# Supplementary material for: Exploration of Potential Integrated Models of N6-Methyladenosine Immunity in Systemic Lupus Erythematosus by Bioinformatic Analyses
Source: Front Immunol. 2022 Feb 7;12:752736. doi: 10.3389/fimmu.2021.752736 (PMC8859446; doi:10.3389/fimmu.2021.752736)
Supplement: Supplementary Table 2 — Clinical information of GSE49454 dataset. [file Table_2.xls]

## Sheet: Sheet1
Acc	Platform	Organism	Source	group	age	gender	race	country of origin	years since diagnosis of sle	low c3	low c4
GSM1199352	GPL10558	Homo sapiens	Whole Blood	SLE	52	F	White	France	21.3	N	N
GSM1199353	GPL10558	Homo sapiens	Whole Blood	SLE	58	F	White	France	18.56	N	N
GSM1199354	GPL10558	Homo sapiens	Whole Blood	SLE	56	M	White	France	0.94	Y	N
GSM1199355	GPL10558	Homo sapiens	Whole Blood	SLE	42	F	White	France	7.16	Y	Y
GSM1199356	GPL10558	Homo sapiens	Whole Blood	SLE	50	M	White	France	17.23	N	N
GSM1199357	GPL10558	Homo sapiens	Whole Blood	SLE	44	F	White	France	0.22	Y	Y
GSM1199358	GPL10558	Homo sapiens	Whole Blood	SLE	25	M	White	France	7.9	N	N
GSM1199359	GPL10558	Homo sapiens	Whole Blood	SLE	54	F	White	France	14.62	Y	N
GSM1199360	GPL10558	Homo sapiens	Whole Blood	SLE	45	F	White	France	17.68	Y	N
GSM1199361	GPL10558	Homo sapiens	Whole Blood	SLE	39	F	White	North Africa	0.89	Y	N
GSM1199362	GPL10558	Homo sapiens	Whole Blood	SLE	42	F	White	France	7.66	Y	Y
GSM1199363	GPL10558	Homo sapiens	Whole Blood	SLE	41	F	White	France	18.85	N	N
GSM1199364	GPL10558	Homo sapiens	Whole Blood	SLE	28	F	White	North Africa	12.42	N	N
GSM1199365	GPL10558	Homo sapiens	Whole Blood	SLE	32	F	White	North Africa	4.74	Y	Y
GSM1199367	GPL10558	Homo sapiens	Whole Blood	SLE	47	F	White	North Africa	32.96	Y	Y
GSM1199369	GPL10558	Homo sapiens	Whole Blood	SLE	23	F	White	France	13.21	Y	Y
GSM1199373	GPL10558	Homo sapiens	Whole Blood	SLE	31	M	White	North Africa	8.73	Y	Y
GSM1199376	GPL10558	Homo sapiens	Whole Blood	SLE	35	F	White	North Africa	22.46	N	N
GSM1199379	GPL10558	Homo sapiens	Whole Blood	SLE	56	F	White	North Africa	9.99	N	N
GSM1199388	GPL10558	Homo sapiens	Whole Blood	SLE	20	F	White	France	2.6	Y	Y
GSM1199391	GPL10558	Homo sapiens	Whole Blood	SLE	71	F	White	France	41.3	Y	Y
GSM1199394	GPL10558	Homo sapiens	Whole Blood	SLE	56	M	White	France	1.02	Y	N
GSM1199396	GPL10558	Homo sapiens	Whole Blood	SLE	27	M	Asian	Vietnam	7.1	Y	Y
GSM1199398	GPL10558	Homo sapiens	Whole Blood	SLE	47	F	White	France	3.91	Y	Y
GSM1199399	GPL10558	Homo sapiens	Whole Blood	SLE	43	F	White	France	8.03	Y	Y
GSM1199400	GPL10558	Homo sapiens	Whole Blood	SLE	56	M	White	France	1.45	Y	N
GSM1199401	GPL10558	Homo sapiens	Whole Blood	SLE	36	F	Black	Cuba	0.45	Y	Y
GSM1199402	GPL10558	Homo sapiens	Whole Blood	SLE	54	F	White	North Africa	0.44	N	N
GSM1199403	GPL10558	Homo sapiens	Whole Blood	SLE	32	F	White	North Africa	4.63	Y	Y
GSM1199404	GPL10558	Homo sapiens	Whole Blood	SLE	40	F	White	France	17.63	N	N
GSM1199405	GPL10558	Homo sapiens	Whole Blood	SLE	47	F	White	France	3.81	Y	Y
GSM1199406	GPL10558	Homo sapiens	Whole Blood	SLE	27	F	White	France	0.46	N	Y
GSM1199407	GPL10558	Homo sapiens	Whole Blood	SLE	38	F	Black	New Caledonia	7.88	N	N
GSM1199408	GPL10558	Homo sapiens	Whole Blood	SLE	56	M	White	France	1.19	Y	N
GSM1199409	GPL10558	Homo sapiens	Whole Blood	SLE	48	F	White	North Africa	7.85	N	N
GSM1199410	GPL10558	Homo sapiens	Whole Blood	SLE	41	M	White	North Africa	2.26	N	N
GSM1199411	GPL10558	Homo sapiens	Whole Blood	SLE	54	F	White	North Africa	0.06	Y	Y
GSM1199412	GPL10558	Homo sapiens	Whole Blood	SLE	42	F	White	France	23.94	Y	Y
GSM1199413	GPL10558	Homo sapiens	Whole Blood	SLE	20	F	White	France	3.33	Y	Y
GSM1199414	GPL10558	Homo sapiens	Whole Blood	SLE	54	F	White	France	26.37	N	N
GSM1199416	GPL10558	Homo sapiens	Whole Blood	SLE	56	M	White	France	0.79	Y	N
GSM1199417	GPL10558	Homo sapiens	Whole Blood	SLE	43	F	White	France	25.11	Y	Y
GSM1199419	GPL10558	Homo sapiens	Whole Blood	SLE	23	F	White	France	12.49	Y	Y
GSM1199420	GPL10558	Homo sapiens	Whole Blood	SLE	50	M	White	France	17.99	N	N
GSM1199421	GPL10558	Homo sapiens	Whole Blood	SLE	39	F	White	North Africa	0.62	N	N
GSM1199422	GPL10558	Homo sapiens	Whole Blood	SLE	47	F	White	North Africa	33.06	N	Y
GSM1199423	GPL10558	Homo sapiens	Whole Blood	SLE	42	F	White	France	7.9	Y	Y
GSM1199424	GPL10558	Homo sapiens	Whole Blood	SLE	38	F	White	France	21.85	N	N
GSM1199425	GPL10558	Homo sapiens	Whole Blood	SLE	52	F	White	France	20.94	N	N
GSM1199426	GPL10558	Homo sapiens	Whole Blood	SLE	46	F	White	North Africa	6.11	N	N
GSM1199427	GPL10558	Homo sapiens	Whole Blood	SLE	70	F	White	France	40.46	Y	Y
GSM1199428	GPL10558	Homo sapiens	Whole Blood	SLE	30	M	White	France	10.01	Y	Y
GSM1199429	GPL10558	Homo sapiens	Whole Blood	SLE	51	F	White	France	13.33	Y	Y
GSM1199430	GPL10558	Homo sapiens	Whole Blood	SLE	49	F	White	North Africa	30.54	N	N
GSM1199432	GPL10558	Homo sapiens	Whole Blood	SLE	47	F	White	North Africa	33.02	N	N
GSM1199433	GPL10558	Homo sapiens	Whole Blood	SLE	40	M	White	North Africa	1.76	N	N
GSM1199434	GPL10558	Homo sapiens	Whole Blood	SLE	30	F	White	France	21.61	N	N
GSM1199435	GPL10558	Homo sapiens	Whole Blood	SLE	26	F	White	France	0.13	N	N
GSM1199436	GPL10558	Homo sapiens	Whole Blood	SLE	41	M	White	North Africa	2.53	N	N
GSM1199438	GPL10558	Homo sapiens	Whole Blood	SLE	45	F	White	North Africa	5.29	N	N
GSM1199441	GPL10558	Homo sapiens	Whole Blood	SLE	25	F	White	North Africa	15.04	N	N
GSM1199442	GPL10558	Homo sapiens	Whole Blood	SLE	26	F	White	France	0.25	N	N
GSM1199443	GPL10558	Homo sapiens	Whole Blood	SLE	51	F	White	North Africa	32.56	N	N
GSM1199444	GPL10558	Homo sapiens	Whole Blood	SLE	35	F	White	France	0.68	N	N
GSM1199445	GPL10558	Homo sapiens	Whole Blood	SLE	54	F	White	France	14.95	N	N
GSM1199446	GPL10558	Homo sapiens	Whole Blood	SLE	32	F	Black	Zaire	9.21	N	N
GSM1199447	GPL10558	Homo sapiens	Whole Blood	SLE	49	M	White	France	16.65	N	N
GSM1199448	GPL10558	Homo sapiens	Whole Blood	SLE	41	F	White	France	23.63	Y	Y
GSM1199449	GPL10558	Homo sapiens	Whole Blood	SLE	71	F	White	France	41.09	Y	Y
GSM1199451	GPL10558	Homo sapiens	Whole Blood	SLE	27	F	White	France	5.93	Y	N
GSM1199452	GPL10558	Homo sapiens	Whole Blood	SLE	60	F	White	France	30.52	N	N
GSM1199453	GPL10558	Homo sapiens	Whole Blood	SLE	42	F	White	France	24.29	Y	Y
GSM1199454	GPL10558	Homo sapiens	Whole Blood	SLE	42	F	White	France	7.5	Y	Y
GSM1199455	GPL10558	Homo sapiens	Whole Blood	SLE	45	F	White	North Africa	5.56	N	N
GSM1199456	GPL10558	Homo sapiens	Whole Blood	SLE	54	F	White	North Africa	0.3	N	N
GSM1199457	GPL10558	Homo sapiens	Whole Blood	SLE	35	F	White	North Africa	22.55	N	N
GSM1199458	GPL10558	Homo sapiens	Whole Blood	SLE	27	F	White	France	5.41	Y	N
GSM1199459	GPL10558	Homo sapiens	Whole Blood	SLE	34	F	White	North Africa	22.29	N	N
GSM1199460	GPL10558	Homo sapiens	Whole Blood	SLE	37	F	White	France	0.08	Y	Y
GSM1199461	GPL10558	Homo sapiens	Whole Blood	SLE	31	M	White	North Africa	8.3	N	N
GSM1199462	GPL10558	Homo sapiens	Whole Blood	SLE	43	M	White	France	1.44	N	N
GSM1199463	GPL10558	Homo sapiens	Whole Blood	SLE	27	F	White	France	6.06	Y	N
GSM1199465	GPL10558	Homo sapiens	Whole Blood	SLE	50	M	White	France	17.84	N	N
GSM1199466	GPL10558	Homo sapiens	Whole Blood	SLE	36	F	White	France	15.78	Y	Y
GSM1199467	GPL10558	Homo sapiens	Whole Blood	SLE	36	F	Black	Cuba	0.92	N	N
GSM1199470	GPL10558	Homo sapiens	Whole Blood	SLE	31	F	White	France	22.57	N	N
GSM1199471	GPL10558	Homo sapiens	Whole Blood	SLE	55	F	White	France	27.2	Y	N
GSM1199472	GPL10558	Homo sapiens	Whole Blood	SLE	27	F	White	North Africa	3.04	N	N
GSM1199474	GPL10558	Homo sapiens	Whole Blood	SLE	50	M	White	France	17.51	N	N
GSM1199475	GPL10558	Homo sapiens	Whole Blood	SLE	58	F	White	France	19.29	N	Y
GSM1199476	GPL10558	Homo sapiens	Whole Blood	SLE	42	F	White	France	7.32	Y	Y
GSM1199477	GPL10558	Homo sapiens	Whole Blood	SLE	38	F	White	France	5.14	N	N
GSM1199478	GPL10558	Homo sapiens	Whole Blood	SLE	27	F	Asian	Philippines	2.99	N	N
GSM1199479	GPL10558	Homo sapiens	Whole Blood	SLE	32	F	White	France	6.43	N	N
GSM1199480	GPL10558	Homo sapiens	Whole Blood	SLE	39	F	White	North Africa	2.73	N	N
GSM1199481	GPL10558	Homo sapiens	Whole Blood	SLE	55	F	White	North Africa	0.9	N	N
GSM1199482	GPL10558	Homo sapiens	Whole Blood	SLE	38	F	White	France	4.8	N	N
GSM1199483	GPL10558	Homo sapiens	Whole Blood	SLE	36	F	Black	Cuba	0.82	N	N
GSM1199484	GPL10558	Homo sapiens	Whole Blood	SLE	51	F	Black	Comorres	20.33	N	N
GSM1199485	GPL10558	Homo sapiens	Whole Blood	SLE	54	F	White	North Africa	0.09	N	N
GSM1199486	GPL10558	Homo sapiens	Whole Blood	SLE	23	F	White	France	12.89	Y	Y
GSM1199487	GPL10558	Homo sapiens	Whole Blood	SLE	51	F	White	France	22.73	N	N
GSM1199488	GPL10558	Homo sapiens	Whole Blood	SLE	20	F	White	France	3.22	Y	Y
GSM1199489	GPL10558	Homo sapiens	Whole Blood	SLE	49	F	White	North Africa	30.92	N	N
GSM1199491	GPL10558	Homo sapiens	Whole Blood	SLE	34	F	White	France	0.28	Y	Y
GSM1199493	GPL10558	Homo sapiens	Whole Blood	SLE	54	F	White	North Africa	2.35	N	Y
GSM1199494	GPL10558	Homo sapiens	Whole Blood	SLE	25	F	White	France	3.62	Y	N
GSM1199495	GPL10558	Homo sapiens	Whole Blood	SLE	25	F	White	North Africa	3.43	N	N
GSM1199496	GPL10558	Homo sapiens	Whole Blood	SLE	21	F	White	France	4.22	Y	N
GSM1199497	GPL10558	Homo sapiens	Whole Blood	SLE	36	F	White	North Africa	9.81	Y	N
GSM1199498	GPL10558	Homo sapiens	Whole Blood	SLE	67	F	White	France	16.69	Y	N
GSM1199499	GPL10558	Homo sapiens	Whole Blood	SLE	36	F	White	North Africa	0.85	N	N
GSM1199500	GPL10558	Homo sapiens	Whole Blood	SLE	44	M	White	France	2.93	Y	N
GSM1199501	GPL10558	Homo sapiens	Whole Blood	SLE	52	F	White	France	23.3	N	N
GSM1199502	GPL10558	Homo sapiens	Whole Blood	SLE	55	F	White	North Africa	9.53	N	N
GSM1199503	GPL10558	Homo sapiens	Whole Blood	SLE	36	F	Black	Cuba	0.56	Y	Y
GSM1199504	GPL10558	Homo sapiens	Whole Blood	SLE	26	F	White	North Africa	2.43	N	N
GSM1199505	GPL10558	Homo sapiens	Whole Blood	SLE	33	F	White	France	6.97	N	N
GSM1199506	GPL10558	Homo sapiens	Whole Blood	SLE	26	F	Asian	Philippines	1.88	N	N
GSM1199507	GPL10558	Homo sapiens	Whole Blood	SLE	36	F	White	North Africa	0.39	N	N
GSM1199508	GPL10558	Homo sapiens	Whole Blood	SLE	35	F	White	France	1.01	N	Y
GSM1199509	GPL10558	Homo sapiens	Whole Blood	SLE	37	F	White	North Africa	0.53	N	N
GSM1199510	GPL10558	Homo sapiens	Whole Blood	SLE	46	F	White	France	3.58	Y	Y
GSM1199511	GPL10558	Homo sapiens	Whole Blood	SLE	31	F	White	France	22.18	N	N
GSM1199512	GPL10558	Homo sapiens	Whole Blood	SLE	52	F	White	North Africa	28.89	N	N
GSM1199513	GPL10558	Homo sapiens	Whole Blood	SLE	59	F	White	France	29.62	N	N
GSM1199514	GPL10558	Homo sapiens	Whole Blood	SLE	36	F	White	North Africa	9.37	Y	Y
GSM1199515	GPL10558	Homo sapiens	Whole Blood	SLE	27	M	Asian	Vietnam	6.89	Y	Y
GSM1199516	GPL10558	Homo sapiens	Whole Blood	SLE	38	F	White	France	22.1	N	N
GSM1199517	GPL10558	Homo sapiens	Whole Blood	SLE	37	F	White	France	0.27	Y	N
GSM1199518	GPL10558	Homo sapiens	Whole Blood	SLE	48	F	White	North Africa	7.87	N	N
GSM1199519	GPL10558	Homo sapiens	Whole Blood	SLE	26	M	White	France	8.16	N	N
GSM1199520	GPL10558	Homo sapiens	Whole Blood	SLE	22	F	White	France	12.44	Y	Y
GSM1199521	GPL10558	Homo sapiens	Whole Blood	SLE	27	M	White	France	20.35	Y	N
GSM1199522	GPL10558	Homo sapiens	Whole Blood	SLE	52	F	White	France	21.53	N	N
GSM1199523	GPL10558	Homo sapiens	Whole Blood	SLE	52	F	Black	Comorres	21.29	N	N
GSM1199525	GPL10558	Homo sapiens	Whole Blood	SLE	33	F	White	France	6.85	N	N
GSM1199527	GPL10558	Homo sapiens	Whole Blood	SLE	36	F	Black	Cuba	0.7	Y	N
GSM1199528	GPL10558	Homo sapiens	Whole Blood	SLE	54	F	White	France	15.31	N	N
GSM1199530	GPL10558	Homo sapiens	Whole Blood	SLE	22	F	White	France	5.11	Y	Y
GSM1199532	GPL10558	Homo sapiens	Whole Blood	SLE	38	F	White	France	21.39	N	N
GSM1199533	GPL10558	Homo sapiens	Whole Blood	SLE	29	F	White	France	7.07	Y	Y
GSM1199534	GPL10558	Homo sapiens	Whole Blood	SLE	35	F	White	North Africa	22.97	N	N
GSM1199535	GPL10558	Homo sapiens	Whole Blood	SLE	39	F	White	North Africa	0.99	Y	N
GSM1199536	GPL10558	Homo sapiens	Whole Blood	SLE	35	F	White	France	0.5	N	N
GSM1199537	GPL10558	Homo sapiens	Whole Blood	SLE	25	M	White	France	7.49	N	N
GSM1199538	GPL10558	Homo sapiens	Whole Blood	SLE	18	F	Asian	China	1.11	N	N
GSM1199539	GPL10558	Homo sapiens	Whole Blood	SLE	40	F	White	North Africa	3.24	Y	Y
GSM1199540	GPL10558	Homo sapiens	Whole Blood	SLE	54	F	White	North Africa	2.13	N	Y
GSM1199541	GPL10558	Homo sapiens	Whole Blood	SLE	50	M	White	France	17.63	N	N
GSM1199542	GPL10558	Homo sapiens	Whole Blood	SLE	27	M	Asian	Vietnam	6.81	Y	Y
GSM1199543	GPL10558	Homo sapiens	Whole Blood	SLE	46	F	White	France	3.3	Y	N
GSM1199544	GPL10558	Homo sapiens	Whole Blood	SLE	48	F	White	North Africa	30.24	Y	Y
GSM1199545	GPL10558	Homo sapiens	Whole Blood	SLE	29	F	White	France	7.4	Y	Y
GSM1199546	GPL10558	Homo sapiens	Whole Blood	SLE	52	F	Black	Comorres	20.76	N	N
GSM1199547	GPL10558	Homo sapiens	Whole Blood	SLE	44	F	White	France	0.18	Y	Y
GSM1199548	GPL10558	Homo sapiens	Whole Blood	SLE	56	F	White	North Africa	9.93	N	N
GSM1199381	GPL10558	Homo sapiens	Whole Blood	Healthy control of SLE	38	M	White	France	NULL	NULL	NULL
GSM1199384	GPL10558	Homo sapiens	Whole Blood	Healthy control of SLE	25	F	White	France	NULL	NULL	NULL
GSM1199386	GPL10558	Homo sapiens	Whole Blood	Healthy control of SLE	51	M	White	France	NULL	NULL	NULL
GSM1199415	GPL10558	Homo sapiens	Whole Blood	Healthy control of SLE	18	F	White	France	NULL	NULL	NULL
GSM1199418	GPL10558	Homo sapiens	Whole Blood	Healthy control of SLE	38	F	White	France	NULL	NULL	NULL
GSM1199431	GPL10558	Homo sapiens	Whole Blood	Healthy control of SLE	65	F	White	North Africa	NULL	NULL	NULL
GSM1199437	GPL10558	Homo sapiens	Whole Blood	Healthy control of SLE	35	F	White	North Africa	NULL	NULL	NULL
GSM1199439	GPL10558	Homo sapiens	Whole Blood	Healthy control of SLE	43	F	White	North Africa	NULL	NULL	NULL
GSM1199440	GPL10558	Homo sapiens	Whole Blood	Healthy control of SLE	40	F	White	North Africa	NULL	NULL	NULL
GSM1199450	GPL10558	Homo sapiens	Whole Blood	Healthy control of SLE	45	F	Black	French West Indies	NULL	NULL	NULL
GSM1199464	GPL10558	Homo sapiens	Whole Blood	Healthy control of SLE	37	M	White	North Africa	NULL	NULL	NULL
GSM1199468	GPL10558	Homo sapiens	Whole Blood	Healthy control of SLE	21	F	White	France	NULL	NULL	NULL
GSM1199469	GPL10558	Homo sapiens	Whole Blood	Healthy control of SLE	57	F	White	France	NULL	NULL	NULL
GSM1199473	GPL10558	Homo sapiens	Whole Blood	Healthy control of SLE	19	F	White	France	NULL	NULL	NULL
GSM1199490	GPL10558	Homo sapiens	Whole Blood	Healthy control of SLE	37	F	White	France	NULL	NULL	NULL
GSM1199492	GPL10558	Homo sapiens	Whole Blood	Healthy control of SLE	50	F	White	France	NULL	NULL	NULL
GSM1199524	GPL10558	Homo sapiens	Whole Blood	Healthy control of SLE	52	F	White	France	NULL	NULL	NULL
GSM1199526	GPL10558	Homo sapiens	Whole Blood	Healthy control of SLE	29	F	White	North Africa	NULL	NULL	NULL
GSM1199529	GPL10558	Homo sapiens	Whole Blood	Healthy control of SLE	42	F	White	North Africa	NULL	NULL	NULL
GSM1199531	GPL10558	Homo sapiens	Whole Blood	Healthy control of SLE	67	F	White	France	NULL	NULL	NULL
