# Supplementary material for: Exploration of Potential Integrated Models of N6-Methyladenosine Immunity in Systemic Lupus Erythematosus by Bioinformatic Analyses
Source: Front Immunol. 2022 Feb 7;12:752736. doi: 10.3389/fimmu.2021.752736 (PMC8859446; doi:10.3389/fimmu.2021.752736)
Supplement: Supplementary Table 3 — Datas of the gene expression of GSE61635. [file Table_3.xlsx]

## Sheet: Sheet1
ID	GSM1509610	GSM1509611	GSM1509612	GSM1509613	GSM1509614	GSM1509615	GSM1509616	GSM1509617	GSM1509618	GSM1509619	GSM1509620	GSM1509621	GSM1509622	GSM1509623	GSM1509624	GSM1509625	GSM1509626	GSM1509627	GSM1509628	GSM1509629	GSM1509630	GSM1509631	GSM1509632	GSM1509633	GSM1509634	GSM1509635	GSM1509636	GSM1509637	GSM1509638	GSM1509639	GSM1509640	GSM1509641	GSM1509642	GSM1509643	GSM1509644	GSM1509645	GSM1509646	GSM1509647	GSM1509648	GSM1509649	GSM1509650	GSM1509651	GSM1509652	GSM1509653	GSM1509654	GSM1509655	GSM1509656	GSM1509657	GSM1509658
A1BG	4.0876	4.04257	3.93863	4.23141	3.6652	3.87043	3.65095	3.75212	3.43584	3.75835	4.14787	3.59445	4.44776	4.06059	3.85247	4.14142	3.99152	4.17927	3.49817	3.68696	3.86987	3.90783	3.97118	4.05169	4.32149	4.23435	4.20382	3.80339	3.36412	4.1849	3.74639	3.78917	3.79997	4.15025	4.7406	3.91818	4.18166	4.3356	3.64908	3.53478	4.53427	3.88857	3.59402	3.63555	3.77366	3.34332	3.43862	4.09064	4.25696
A1BG-AS1	6.90119	6.63672	6.86758	6.59466	6.40438	6.71356	6.37578	6.72152	6.43354	6.78005	6.60182	6.09034	6.96978	6.64299	6.76535	6.90425	6.55383	6.77209	6.73101	6.97839	6.45211	6.72508	6.8941	6.78253	6.66682	6.88814	6.78516	6.42623	6.5275	7.17648	6.76208	6.5133	6.93045	6.74967	7.23838	6.5099	6.73103	6.68241	6.32674	6.64638	6.50056	6.49308	6.97294	6.44441	6.40919	6.5446	6.3463	6.51084	6.66834
A1CF	3.19557	2.83952	2.8818	3.2113	3.62821	2.80778	3.84273	3.79174	3.88581	3.23356	2.76557	3.67202	2.47559	2.72018	2.71456	3.01364	2.94959	3.24347	3.37258	3.1584	2.81406	2.76972	2.74164	3.30815	3.33338	2.90089	2.76849	2.74283	3.73784	2.61347	2.67913	4.68712	2.55045	3.65899	2.57922	3.5644	3.01061	2.78104	4.1904	3.33504	2.75427	2.96667	4.1572	2.99551	3.57808	3.17575	4.49987	3.25616	2.89215
A2M	4.68541	4.70464	4.48581	4.6231	4.80539	4.56691	4.68293	4.35586	4.93154	4.5711	4.0747	4.84978	4.7723	4.4847	4.28449	4.92903	4.31804	4.56243	4.84563	4.61	4.89023	4.43351	4.1917	4.61489	4.34633	4.14513	4.56317	4.56645	4.06485	4.66132	4.59316	4.49796	4.41678	4.96936	4.43481	4.73748	4.46095	4.22396	4.7192	5.09445	4.46054	4.97131	4.56027	4.37795	4.4758	4.44732	4.53671	5.09287	4.18281
A2M-AS1	6.21406	6.40487	6.14434	4.90838	5.2395	4.86682	4.1994	5.32335	5.02525	5.9109	5.06283	3.76553	6.08623	4.8882	4.07366	5.91187	4.34962	4.60029	4.62748	5.77019	6.39147	5.26526	4.78257	5.0911	4.97439	5.02357	4.10219	4.93229	4.11465	5.69925	6.18182	4.41824	4.36675	6.05473	5.41737	4.42946	4.50144	4.70262	4.79023	6.26646	7.18988	6.13274	5.91941	5.13542	4.33769	4.71646	3.37375	6.72978	4.31165
A2ML1	2.70614	2.57158	2.57578	3.03195	3.66713	2.59845	3.56316	3.27926	3.20603	2.85879	2.75287	3.45126	2.67603	2.74132	2.86025	3.32708	3.05172	3.17177	3.53688	2.67046	2.73617	2.82691	2.97114	2.80822	3.06944	3.14812	2.85427	3.193	3.31922	2.57007	2.81057	3.89167	2.68073	3.64258	2.75809	3.44611	2.71412	3.20482	4.12505	3.07371	2.87558	2.91085	3.78182	2.98128	3.69261	3.15959	4.17921	3.04779	2.90738
A2MP1	5.44632	5.76943	5.24841	5.45179	6.50456	4.86143	5.62005	5.60949	5.20393	6.60686	4.76747	5.33364	4.80471	4.46693	3.92788	5.61267	4.9934	5.85258	5.7908	5.13888	5.68265	5.308	4.91221	4.90962	4.227	4.81792	4.23316	4.9026	4.82676	4.99884	5.69344	5.50226	5.14767	5.44626	5.50637	4.95575	4.47345	5.14291	5.43938	6.0058	6.41873	5.19517	6.22356	4.50004	5.98985	6.15755	5.70524	6.24993	5.69762
A4GALT	5.85246	5.64609	5.76517	5.8486	5.91744	5.90019	6.16011	5.90537	5.92613	5.98839	5.44642	6.32178	6.41055	5.82335	5.84414	5.87072	5.58618	6.38949	5.97417	5.65177	5.65553	5.79385	5.64649	5.83917	5.94834	5.93321	6.216	6.0584	5.71091	5.78336	5.85075	6.07497	5.64666	5.82335	5.77774	6.01854	6.18956	5.91805	5.8459	5.81891	5.54111	6.19272	5.73503	5.84335	5.71728	5.83031	6.11355	5.95886	5.62895
A4GNT	2.54987	2.27154	2.32895	2.28642	2.22274	2.3254	2.23786	2.02125	2.333	2.35591	2.70968	2.14441	2.61944	2.6065	2.5246	2.10194	2.40447	2.59874	2.28295	2.04179	2.08435	2.23329	2.35591	2.06716	2.3059	2.34625	2.48293	2.46059	2.2739	2.5921	2.32912	2.60591	2.19707	2.35888	3.07837	2.02696	2.29472	2.72364	2.11535	2.08662	2.26554	2.56077	2.17136	2.11432	2.23093	2.64007	2.10745	2.49284	2.39732
AA06	4.24209	3.69635	4.03032	3.48706	3.83261	3.55517	3.89468	3.91422	3.98357	3.77796	3.64603	3.66457	3.93727	3.96247	4.12679	3.51197	3.74311	3.77413	4.25	3.62515	3.8447	3.62818	3.59192	3.87889	3.69307	3.92768	4.09809	3.80955	3.60871	3.86131	3.76133	3.68075	3.78635	3.92366	3.71078	4.07235	3.81444	3.77556	3.6409	3.51487	3.71431	3.73517	3.48654	3.44158	4.01527	3.55256	3.57365	3.64984	3.80811
AAAS	7.64701	7.58821	7.69311	6.83958	6.70642	7.54514	6.96757	7.37204	7.25616	7.56961	7.79766	7.40815	7.94778	7.29884	7.42143	7.13413	7.58003	7.31526	7.16536	7.69869	7.53014	7.59063	7.76278	7.36172	7.35535	7.48042	7.17429	7.04674	7.44834	7.74275	7.43025	6.6826	7.94316	7.67909	7.86275	7.18228	7.19418	7.44908	7.0144	7.54991	7.90281	7.31794	7.19155	7.23092	6.80008	7.18687	7.03902	7.11681	7.48875
AACS	7.09871	6.83995	6.94792	5.95864	6.39096	6.7382	5.97505	6.3682	6.28871	6.27162	7.67328	5.92263	7.41757	6.51781	6.63129	6.08708	6.60275	6.88987	6.28405	6.78646	6.49399	6.54666	6.79083	6.83445	6.78437	6.6865	6.16623	6.60648	6.39332	7.52939	6.63404	6.7214	7.07466	6.15129	7.57057	6.53103	6.41368	6.71153	6.45554	6.11934	6.59961	6.64147	6.71017	6.616	5.59187	6.24443	6.04529	6.50125	6.66037
AACSP1	2.7994	2.97269	2.75717	3.14411	3.12522	2.82472	3.56809	3.57963	3.31433	3.35898	2.99344	3.83194	2.4152	2.81353	3.13487	3.35161	2.67297	3.0104	3.37284	3.25137	3.35827	2.94093	2.67298	2.97291	2.79449	2.89174	3.0659	2.80564	3.06838	3.13503	2.85333	4.15135	2.42586	2.97937	2.7635	3.67475	2.83066	3.27333	3.52697	3.6855	2.98418	2.79878	3.78782	2.96058	3.20918	3.06513	3.36127	3.14445	2.68208
AADAC	3.10719	2.78021	2.63778	4.36753	4.71964	2.58886	4.11522	3.58229	5.1251	4.66857	2.57743	3.63771	2.70259	2.90292	2.93354	4.02698	3.04397	6.61807	4.06237	2.65414	3.11999	2.718	2.82541	3.16021	3.09776	3.06984	2.69195	3.30952	3.38954	2.59602	3.72072	4.9301	2.47391	3.21122	2.6387	3.06786	3.14448	4.23549	3.75268	3.38511	2.50715	2.91727	3.44287	3.28222	4.448	4.95846	3.43905	3.42106	2.89201
AADACL2	3.1666	2.77303	2.32698	4.08618	5.97033	2.01644	3.58492	3.52753	5.49373	4.93558	2.06919	3.92891	2.11283	2.02149	2.233	4.4047	2.22119	5.93099	4.89421	2.58166	2.96275	2.82904	2.18918	2.52824	2.36842	2.49169	2.81564	2.44696	2.46549	2.1088	4.21405	3.97849	2.08452	2.29324	2.29315	2.60017	2.76458	3.50967	4.25072	3.48368	2.36424	2.10644	3.57459	2.30449	4.89696	4.33035	2.49659	3.47059	2.3636
AADACP1	2.22276	2.21214	1.9304	2.1803	2.27014	1.82714	2.53175	2.20027	2.48085	2.30781	2.23661	1.91352	2.34926	2.07502	2.20129	2.29522	2.1056	2.17452	2.82604	1.78454	2.59893	2.07966	2.05169	1.90045	2.11798	1.86563	2.23037	2.30176	2.16939	1.96369	1.78945	2.2665	2.02396	2.1056	2.00211	2.1056	2.07638	2.07502	2.63963	2.42392	2.20533	1.98884	2.34795	2.1056	2.19747	1.88843	1.93617	2.8312	1.96241
AADAT	2.9955	2.9961	3.11496	3.51327	3.78067	3.23598	4.30606	3.60337	3.46172	3.66218	2.81819	4.90176	3.3308	3.09148	3.4926	3.44233	3.27987	3.42809	3.98927	2.98155	3.35272	3.215	2.84039	3.06302	3.35161	3.55105	3.46856	3.22478	3.33507	2.92665	3.45546	4.75795	2.89069	3.58604	3.20343	3.54574	3.83691	3.27333	4.31007	3.9176	3.53414	3.00448	3.58702	3.71125	4.26983	4.20834	4.01253	3.19147	3.51238
AAED1	5.62868	5.79473	5.30958	5.21473	5.20157	6.13733	4.9533	5.68343	4.91455	4.88464	6.73368	5.06959	7.20217	5.32665	5.66623	5.55601	6.34411	5.214	5.21786	6.10933	5.73442	5.8355	5.44962	6.15539	5.97643	5.87599	5.51018	5.49507	5.81341	6.90537	5.9599	4.86178	6.84185	5.62524	7.15045	5.91924	6.01458	6.54402	4.78436	5.58986	6.10385	5.54418	6.1516	6.1444	4.44515	5.78298	5.80668	5.73487	5.91353
AAGAB	7.1089	7.07645	6.89051	6.91768	6.88356	7.04161	7.06946	6.8566	6.87322	7.13012	7.0643	6.76572	7.33929	7.05086	6.9181	7.21603	6.99435	7.17373	7.38635	7.12908	7.00155	7.15724	6.70981	7.10751	6.82542	6.92703	6.84333	6.74955	7.0949	7.32617	7.22388	7.00397	7.13132	7.0833	7.39357	6.84105	6.60825	6.99759	6.87951	7.15757	7.34031	7.08273	6.6585	6.99805	6.9349	7.25612	6.61249	6.98438	6.93928
AAK1	5.01985	4.83432	5.37818	5.07852	4.45888	5.01055	4.63693	4.52416	4.78426	4.84599	4.60429	4.70877	5.14288	5.17211	4.56463	5.49105	4.78244	5.22454	4.69193	5.42026	4.40325	5.03046	4.94785	4.82974	4.73977	4.61974	4.52229	4.86477	4.78659	4.53295	5.12685	5.11253	5.35498	5.01129	5.07684	4.82433	4.61023	4.33769	4.03167	5.17155	5.06429	5.02444	4.87955	4.40765	4.78244	4.82647	4.29491	5.55713	4.47325
AAMDC	6.30604	6.26555	6.19419	6.78837	5.97908	6.55756	5.3796	6.17275	5.81297	6.11199	5.76575	5.65582	7.2502	6.47835	6.46344	5.80085	6.75918	6.01834	5.53365	6.26127	5.8752	6.49589	5.98815	6.56359	6.74728	6.38084	5.94308	6.40348	5.93048	6.83671	6.03314	4.97774	6.75748	5.74962	7.05653	6.24936	6.07255	6.36697	5.96646	6.01691	6.51196	6.0342	5.29216	5.94851	5.69272	6.15743	5.85079	6.19057	6.48513
AAMP	7.18115	7.16474	7.03189	6.7513	6.86788	7.20472	6.65328	7.1869	6.91224	7.10075	7.26678	6.86311	8.07068	7.12053	7.08728	7.06666	7.03222	7.15201	7.03834	7.28068	6.94588	7.24741	6.93086	7.40868	7.31688	7.13034	6.81043	6.93061	6.92849	7.78906	7.1466	7.11583	7.75743	6.9505	8.12782	7.21254	7.04687	7.33991	6.58335	6.96177	7.44171	6.69489	7.42758	7.22131	5.66837	6.94344	6.82517	6.86409	7.27049
AANAT	3.31697	2.74382	2.54828	2.47878	2.76871	2.52667	2.52753	2.92507	2.81192	2.77657	2.38838	2.73003	2.57617	3.05557	2.73656	2.51175	2.94135	3.61215	2.57064	3.16121	2.69338	2.48603	2.78712	2.93582	2.85195	2.8147	2.76845	2.6619	2.91439	3.34457	2.43718	2.81079	2.70791	2.91228	2.75017	2.82255	3.20772	3.12297	2.5018	2.43266	2.86942	3.46695	2.89224	3.05955	2.60635	2.31557	3.27241	2.76974	2.73996
AAR2	8.00486	7.93948	7.49892	7.15073	6.66961	7.91671	7.40637	7.55161	7.31204	7.66658	8.05355	7.30889	8.52956	7.74173	7.34229	7.83552	7.86259	7.50829	7.79143	7.9045	7.78607	7.70603	7.86374	7.70485	7.85956	7.7257	7.56624	7.59736	7.30009	8.51257	8.01321	7.19184	8.49448	7.36316	8.85727	7.37341	7.40127	7.8194	7.42585	7.39338	7.94637	7.4042	7.70711	7.51944	6.49128	7.67638	7.56768	7.74287	7.88716
AARS	8.27883	8.26651	8.09561	7.41004	7.43301	8.22169	7.73487	8.08293	7.39332	7.84353	7.91998	8.26678	8.7957	8.14381	7.89564	8.13445	8.43322	8.0196	7.71497	8.37917	8.19132	7.77344	8.72948	7.92833	7.90443	7.56019	7.70754	7.80127	7.80755	8.7068	8.35249	7.607	9.13007	7.8105	8.90989	8.20995	8.09715	7.6112	7.71536	8.18295	8.30458	8.21504	8.65302	7.87948	6.39014	7.561	7.9567	8.64062	8.40419
AARS2	6.84314	6.95756	6.99883	6.33512	5.87804	6.723	6.10694	6.37842	6.4797	6.95747	6.79964	5.97882	6.92783	6.51734	6.46718	6.7607	6.96409	6.71953	6.14215	6.89641	6.84616	6.66542	6.8495	6.67986	6.67318	6.64844	6.00674	6.94925	6.33188	6.71312	6.82967	6.40719	7.10482	6.5672	7.09974	6.35161	6.55525	6.52991	6.41446	6.88696	7.2497	6.43108	6.88089	6.29847	5.90662	6.51767	6.17454	7.02386	6.71382
AARSD1 /// PTGES3L /// PTGES3L-AARSD1	6.97912	6.83682	6.80357	5.84413	6.16291	6.60195	6.06724	6.07072	6.13584	5.99187	6.53394	6.10081	6.92478	6.16775	6.28518	6.39173	6.47201	6.01368	5.85867	6.4972	6.40503	6.48664	6.62736	6.35301	6.35895	6.27396	6.05753	6.15721	6.20263	6.88485	6.36903	5.85538	6.95801	6.44748	7.07429	5.99169	6.41768	6.47818	5.66568	6.47818	6.82077	6.38129	6.40782	6.26258	5.4103	6.14243	5.73525	6.31948	6.58761
AASDH	7.9203	7.69637	7.91758	7.04287	6.31255	7.77004	7.04532	7.54545	6.88943	7.61006	7.52747	6.73534	7.85215	7.66925	7.30252	8.06616	7.76946	7.64595	6.83121	7.68494	7.21248	7.45981	7.66699	7.62824	7.52384	7.31816	7.24488	7.71532	7.38471	7.96154	7.51717	6.92579	8.20631	6.97232	8.15578	7.31813	7.17485	7.42513	6.77686	7.54244	7.67603	7.47565	7.66941	7.55053	6.44749	7.28242	6.69533	7.70946	7.65216
AASDHPPT	7.84255	7.57888	7.63806	7.53111	7.81031	7.77801	7.96605	7.8225	7.89263	7.6304	7.8851	7.99852	8.15497	7.53309	7.29312	8.08921	7.38811	8.19198	7.95049	8.22371	7.78336	8.02595	7.40885	7.5485	7.5996	7.46592	7.56087	6.95645	7.3441	8.04574	8.09576	8.16971	8.17076	7.46498	8.43558	7.82023	7.16677	7.80278	7.84161	7.75025	7.78396	7.30102	7.6631	7.44169	7.84365	8.12666	7.80582	7.64788	7.90994
AASS	3.42858	4.01255	4.34722	4.08475	4.13553	3.9185	3.81296	3.93099	4.59443	3.82646	3.84882	3.79396	3.2493	3.58437	3.89821	3.47862	3.51817	4.04967	3.79189	3.26871	4.21159	3.40989	3.88672	3.54039	3.58094	3.65868	2.83018	3.61366	3.77141	3.56042	3.63474	4.19404	3.32856	3.78435	3.15921	3.53737	3.59533	3.21667	3.3824	3.56447	3.45386	3.13007	5.3676	3.75617	3.47795	3.41893	4.12077	4.09934	4.02874
AATF	9.37205	9.10894	9.21854	9.40001	9.21929	9.22491	9.06035	9.55136	8.69423	9.21448	9.35821	9.00228	9.74052	9.3749	9.48476	9.14029	9.31	9.27325	9.03574	9.50022	9.29098	9.31549	9.11557	9.46127	9.73047	9.3827	9.41605	9.38885	9.39545	9.77371	9.35534	8.93665	9.55699	9.31836	9.75836	9.60343	9.53761	9.65773	9.1052	9.15504	9.37912	9.63703	9.5068	9.54036	8.97815	9.3452	9.30444	9.19424	9.4429
AATK	6.64831	6.9385	7.0907	7.29429	6.62718	7.00432	7.10186	7.37792	7.16473	6.29549	7.11964	6.78481	5.76037	7.37165	7.82806	6.42438	6.95253	7.32739	6.72806	6.72037	6.88355	7.0571	7.30777	6.60881	7.36721	7.34513	7.48883	7.63989	7.61435	6.23549	6.23216	6.6596	5.52834	6.3715	5.22371	7.10113	7.3547	7.4635	6.99332	6.62728	7.17063	7.87754	6.96122	7.59737	7.20469	7.01387	7.26416	6.58532	7.18012
AB074162 /// MIR181A2HG	6.2266	6.37443	6.19769	6.0995	6.27394	4.48421	4.7904	4.5524	6.62973	6.16348	5.51726	5.50429	5.72423	5.94309	4.52948	6.20382	5.01314	6.56271	6.39073	5.81889	4.81004	4.62816	5.77522	4.84829	6.80005	5.19918	4.91688	5.74574	5.38591	4.76688	6.28793	5.91106	5.89964	5.62078	5.22714	5.46665	5.34526	4.31724	5.09385	5.07015	5.03531	5.2335	6.15374	5.56138	6.03325	5.61931	5.87885	5.87437	4.97521
AB488780	8.11618	8.50828	8.33663	7.31731	7.43119	8.16586	7.71391	7.24747	7.89743	8.27144	7.83637	7.75986	7.06712	7.58609	7.4912	8.33678	8.10406	7.26928	7.8404	7.89507	8.0002	7.90885	7.98052	7.38699	7.56241	7.84236	7.39568	7.65631	7.61809	6.78667	8.05126	7.63474	8.2532	7.93685	7.78285	7.19214	7.44899	6.95856	7.7426	8.07016	8.23798	7.2436	7.68446	7.37223	7.26951	7.37044	6.68263	8.3676	7.74834
ABAT	9.28405	9.27401	9.97988	9.94121	9.14883	8.68077	9.03622	9.34651	9.29654	8.85723	9.54769	9.1836	8.76871	9.6703	9.49084	8.85776	8.97589	8.41015	7.74514	8.6291	8.8376	9.09271	9.15183	9.10997	9.95908	9.66578	9.54398	9.49379	8.9678	9.18217	8.60266	8.99414	8.7816	9.07269	8.73044	9.29176	9.75933	9.46589	9.36792	8.67611	8.63603	9.53166	8.37266	9.53297	9.43464	9.52172	9.12034	8.93658	9.19165
ABCA1	6.41121	6.61158	5.83971	5.59404	6.99129	6.87727	6.51133	6.728	6.54401	5.20388	6.42478	7.01623	5.32634	6.75533	7.11235	6.17599	6.2417	6.87211	6.17497	6.16329	5.68349	6.35278	6.62376	6.33744	5.80016	5.97795	4.80546	7.27918	6.82109	5.14431	6.16584	6.00853	5.59243	6.46036	5.29608	6.86364	6.75753	6.88525	6.6784	6.22471	6.11356	7.11275	5.88421	6.80694	6.63438	6.95371	6.84636	6.754	6.08946
ABCA11P	5.10127	4.37315	4.94114	3.49764	3.96972	4.72404	4.58098	4.67394	3.47496	4.74348	4.9735	4.35277	4.76595	4.87101	4.16112	4.51346	4.76305	4.27278	3.44063	4.31554	4.22119	4.73938	4.70198	3.6123	4.72537	4.0155	3.66634	3.96101	4.19798	4.73161	5.0207	3.91357	5.08439	4.33807	5.16538	4.40993	3.94107	4.38223	3.92563	4.38375	5.15972	4.87333	3.64092	4.52191	4.66177	4.28674	3.84045	4.83455	4.4127
ABCA12	2.87508	3.34215	3.06412	3.21094	3.44801	3.26043	4.57132	3.2031	3.52209	3.36383	2.9619	3.88794	3.27033	3.1211	3.1897	3.1044	3.24001	3.52798	4.17512	3.24509	3.36664	3.33229	3.15879	3.02609	3.33985	3.43542	3.14997	3.42145	3.25021	3.10434	3.31586	4.44289	2.92019	3.34934	3.40375	3.44177	3.37609	3.27333	4.22491	4.12408	3.04274	3.55929	3.52594	3.2621	3.9952	3.65839	3.62643	3.02243	3.07752
ABCA13	3.20583	3.25405	2.56098	5.02843	2.76871	4.40014	2.32087	3.30157	2.82144	2.1643	2.63806	2.49247	3.59979	5.23552	6.10052	2.42689	8.71276	3.17463	2.69619	2.55343	4.1435	6.40035	5.55733	2.95169	4.07806	3.66882	4.31518	7.20618	4.4775	7.43925	4.94316	2.5808	2.75077	4.0213	4.42874	5.36991	4.13943	4.40626	3.36723	5.30669	4.98985	5.27235	2.70619	3.23532	2.78642	3.61879	2.38114	2.54736	3.48074
ABCA17P	5.63406	5.39765	5.85106	5.39673	5.77499	4.92854	5.386	5.31095	5.4053	5.71555	5.35683	5.2826	4.91965	5.33571	4.95557	5.73267	5.06111	6.06358	5.25555	5.01518	5.08239	5.09724	5.59424	5.12601	4.83286	5.21198	5.52882	5.55145	5.69675	5.18236	5.14291	5.69869	4.89277	5.02011	4.72316	5.7786	4.84075	5.33018	5.67864	5.57663	5.5527	5.00958	5.78492	5.68173	5.44264	4.73772	6.09771	5.96262	5.65692
ABCA2	6.26805	6.13236	6.38517	6.53875	6.16812	6.14335	6.25112	5.95193	6.21271	6.09875	6.04743	5.95958	5.50514	6.29814	6.64145	6.11232	6.1763	6.03086	6.19611	5.74735	6.36638	6.07168	6.38692	6.22309	6.48948	6.5906	6.42841	6.32329	6.45822	5.67518	5.99359	5.55123	5.51828	6.43755	5.62689	5.80734	6.50972	5.83103	6.1833	6.2397	6.44552	7.31362	6.39515	6.25108	5.96714	5.95777	6.10676	6.10031	6.20932
ABCA3	6.3546	6.54056	6.22371	5.96827	6.2816	6.02505	6.16775	6.4222	5.99899	6.25646	6.29263	5.66551	6.15037	5.97606	6.04086	6.239	6.08108	6.14934	6.56843	5.85792	6.50465	6.21564	6.10871	6.10986	6.11975	6.32009	6.24238	6.52345	6.04304	6.50341	6.30436	6.59449	6.06884	6.44247	6.40656	6.25734	6.45045	6.06803	5.7654	6.27722	6.30191	6.09036	6.12592	6.19383	5.64855	6.28749	6.69157	6.12878	6.15091
ABCA4	3.78443	3.10914	3.54034	3.33144	3.57404	3.16864	3.34713	3.48244	3.4503	3.59033	3.43858	3.56289	3.34175	3.74699	3.49049	3.27033	3.29521	3.63752	3.50172	3.21179	3.67062	3.12505	3.26689	3.30665	3.61491	3.73637	3.96278	3.47036	3.63795	3.53237	3.5157	3.73106	3.48149	3.45438	3.51701	3.44867	3.9312	3.82744	3.57741	3.50749	3.17475	3.67098	3.41595	3.78574	3.46532	3.5829	3.46903	3.61348	3.30633
ABCA5	8.24813	8.48325	8.25485	8.58648	8.00338	8.20246	8.06108	7.52583	7.92234	8.02107	7.87101	8.35193	7.1695	8.17202	7.8632	7.9523	7.9756	7.70329	7.60222	7.78547	7.95903	7.68283	8.12904	7.33526	7.95976	7.79624	7.96349	8.51102	8.01919	7.31773	7.97088	7.76969	6.73639	7.65607	6.50889	7.13882	7.84365	7.79043	7.59262	8.12087	8.16032	7.77711	6.92833	8.00313	8.16399	7.71862	7.88459	8.64443	7.72724
ABCA6	2.86081	3.00002	3.44223	3.2352	3.30809	3.66438	3.06513	3.02583	3.288	2.79695	3.23996	2.94195	2.75472	2.88856	2.70885	2.1995	3.43999	2.57956	3.54931	2.78506	2.88355	2.66018	2.91481	3.02164	3.3358	3.22196	2.86881	3.15335	3.14697	3.24493	3.05466	3.46368	3.27777	3.28063	3.2603	3.56296	2.86413	3.13734	3.50296	2.8943	3.32231	3.1802	3.26714	3.06513	2.62979	3.04396	2.93844	2.31232	3.09639
ABCA7	7.65104	7.88832	8.49367	8.73405	8.47986	8.39589	7.66795	7.59038	8.2752	8.1987	8.47299	7.526	6.62282	8.4791	8.7758	7.17868	7.82393	8.83077	7.8494	7.94684	8.13388	8.34724	8.13614	8.09178	8.26696	8.46616	8.73292	7.70569	8.27246	6.80498	7.99208	7.29781	6.6628	7.85503	6.51944	8.16213	7.59266	7.31347	8.42947	8.06647	8.18404	8.78661	8.27494	8.56637	8.29238	8.65003	7.59353	8.06683	7.92355
ABCA8	3.09365	3.04575	2.59881	3.17981	3.46917	2.93658	2.80756	2.77633	3.13438	3.09983	2.81821	3.15041	2.67497	3.1948	2.82188	2.87401	3.02973	3.52113	3.43825	2.95407	2.95196	3.15882	2.67537	2.81034	2.71607	2.65211	3.03562	3.22957	2.72234	3.01298	3.22335	3.33219	2.81082	3.10512	2.95989	3.10327	2.94397	3.01873	3.30931	2.5574	3.25169	3.22889	3.83007	3.22617	3.44317	3.83301	3.86646	3.12736	2.83343
ABCA9	3.23995	3.8436	3.47685	3.60653	4.52825	3.31833	4.026	3.85	3.66981	3.43646	3.46054	4.10417	3.2047	3.7655	2.97666	3.67386	3.4475	4.08137	3.68587	3.35983	3.31932	3.3382	3.63265	3.18284	3.41212	3.48111	3.55404	3.2481	3.75125	3.3806	3.69013	4.15057	3.3923	3.5155	3.4593	3.67279	3.52703	3.67713	4.12516	3.95419	3.32687	3.64982	3.59804	3.51343	3.62917	3.76522	3.30072	3.49563	3.31338
ABCB1	7.04746	7.0316	6.55889	6.05723	5.91786	5.74868	4.90213	5.89881	6.29314	6.87911	6.33831	4.92945	6.18921	5.57034	5.41141	6.58511	4.91153	6.52194	5.54291	6.0461	6.74311	5.1063	5.94175	5.34664	6.12124	5.96486	5.60168	5.74013	5.14285	5.97129	6.87374	5.98527	6.17261	6.59501	7.08395	5.81355	4.72193	5.08601	5.7112	5.92865	6.27393	5.72598	6.63527	6.19904	6.05218	5.84664	6.06083	5.96397	6.38434
ABCB1 /// ABCB4	7.72121	7.84414	7.70395	6.67278	6.92415	6.59315	6.29443	6.64212	6.51348	7.76577	6.88953	5.78992	6.53727	6.78654	6.24363	7.53495	5.69525	7.01219	6.38647	7.02182	7.28701	5.98576	7.03505	6.59521	7.15503	6.67997	6.03942	6.08907	5.99888	6.66743	7.67382	7.4235	7.07112	7.28259	7.74529	6.23927	5.62738	5.60665	6.56867	7.19135	7.21856	6.43905	7.55247	6.74609	6.39189	6.52387	7.19558	6.35987	7.56838
ABCB10	8.82448	8.92402	8.53856	8.33634	8.38454	8.99798	8.34286	8.48521	8.20145	8.80712	9.49422	8.59097	9.80013	8.4739	8.43491	8.85813	9.10326	8.50997	8.35065	8.9396	8.64083	8.72784	9.24393	8.92827	8.67937	8.58838	8.58904	8.62961	8.0553	9.65385	8.99768	8.17767	9.55409	8.69016	9.19125	8.60214	8.28853	8.63553	8.22947	8.70059	8.85055	8.29048	8.30578	8.55242	7.80235	8.63452	8.44596	8.68119	8.69219
ABCB11	2.44678	2.65394	2.53236	2.67932	2.88746	2.44494	2.59921	2.6439	2.53468	2.75101	2.54312	2.66905	2.38136	2.70705	2.83629	2.54413	2.48651	3.14302	2.57536	2.54333	2.71158	2.55621	2.50941	2.77082	2.54131	2.51676	2.84697	2.7405	2.41847	2.65733	2.61122	2.88632	2.53765	2.70225	2.50537	2.85918	2.63854	2.67196	2.55816	2.57991	2.49891	2.58944	2.34436	2.71179	2.77471	2.7121	2.89308	2.75027	2.74703
ABCB4	5.37073	5.49964	5.82817	4.73149	4.55603	4.24565	5.83805	5.00461	5.20949	5.56277	4.34312	5.10437	3.88382	5.22514	4.79802	5.73079	3.93711	4.56454	5.66176	4.35117	5.36002	3.6595	5.24943	4.80692	5.91405	4.64593	3.6542	4.60395	4.00094	4.13413	4.82083	6.5986	4.88086	5.15368	4.8027	4.37695	4.71673	4.18001	4.94219	6.04317	5.43441	3.97289	5.2876	4.83643	6.16134	4.97658	4.63318	4.50216	5.26914
ABCB5	2.73191	2.66803	2.78823	3.39055	3.24627	2.9132	3.81861	2.96894	3.25396	2.92983	2.74595	3.3698	2.85576	3.15534	2.89032	2.77162	2.73734	2.89522	3.39271	2.92351	2.86382	2.94148	2.93687	3.01364	2.93583	2.98027	3.11144	3.40891	3.08303	2.62145	2.7339	4.04269	2.71352	3.14415	2.78943	3.323	3.17518	2.84901	3.87032	3.33674	2.71523	3.3138	3.8412	3.27196	3.15081	2.6559	3.17503	3.18773	2.89789
ABCB6	6.13922	5.97004	6.11639	6.2893	5.90522	6.06618	6.18715	6.05352	6.12483	6.02858	6.05869	6.25488	6.23778	6.33172	6.37806	6.1136	6.20103	6.31642	5.48285	6.16392	5.89694	5.99423	6.42462	6.1192	6.35114	6.42283	6.66962	6.18532	6.38103	6.04867	5.69773	5.65343	6.04491	5.94313	6.11475	6.25541	6.54019	6.34438	5.89243	5.77512	6.05377	6.67667	5.77166	6.11008	5.99097	5.83279	6.07019	6.02352	6.16889
ABCB7	8.75484	8.64602	8.59441	7.91045	8.2117	8.69375	8.20658	8.52367	8.21971	8.72897	8.65923	8.13519	9.55433	8.44127	8.37644	8.85835	8.76467	8.34734	8.50008	8.91316	8.45267	8.63463	8.50575	8.58818	8.73485	8.4557	8.32638	8.08595	8.03508	9.11907	8.74132	8.57969	9.22868	8.59235	9.48194	8.35769	8.11908	8.68058	8.26653	8.6463	8.99266	8.11476	8.60361	8.58654	7.63846	8.65203	7.90475	8.14511	8.56778
ABCB8	5.18901	5.01671	5.26955	4.6292	4.70526	5.35731	4.92833	5.0949	4.78503	4.95442	5.22381	4.96805	5.45368	5.29274	5.37826	4.94881	5.31008	5.32453	5.02929	5.29486	5.06165	5.0269	5.50608	5.14565	4.96321	5.07472	5.07726	5.11733	5.30861	5.47443	4.98079	4.67833	5.44956	4.64466	5.57249	5.02091	5.12587	5.09797	4.4692	4.71624	5.31257	5.43024	4.85811	5.02871	4.63663	4.6151	4.95582	5.21101	5.05741
ABCB8 /// ASIC3	4.69793	5.08375	4.7783	4.48727	4.253	5.27696	3.91295	4.46111	4.82496	4.30194	5.00659	4.52251	4.32281	5.01887	5.43661	4.52728	5.08221	4.35278	4.30187	4.77553	4.40022	4.47413	5.07374	4.21216	4.34199	4.95804	4.45883	4.37191	4.60076	4.30435	4.19055	3.83255	4.45627	4.04522	4.34274	4.09662	4.29205	4.09662	3.99313	4.03534	5.56706	4.1251	4.12048	4.66914	4.35664	4.21417	3.80691	4.51601	4.20026
ABCB9	4.30524	3.44472	3.722	3.77302	3.77855	3.88142	3.53863	3.67684	4.34581	3.82234	4.19721	3.86922	4.19986	4.2437	4.74946	4.35393	4.12918	3.26735	3.31089	4.12228	4.22846	3.79964	5.47556	3.85402	4.49795	3.87281	3.84515	3.40022	3.68749	5.09274	4.02252	2.95586	5.41642	3.82224	4.56306	3.8294	3.61254	3.82395	4.01102	3.94657	3.76958	5.20371	3.89766	3.06771	3.68998	3.60811	4.19841	4.70671	4.52825
ABCC1	9.02423	9.0253	8.97241	8.46002	8.67238	9.26875	8.29349	8.45999	8.38456	8.98208	9.53664	8.91666	9.1899	8.80793	8.76179	8.94011	8.88524	8.72111	8.81824	9.12004	8.76553	9.0534	9.09287	8.99829	8.62895	8.47095	8.86455	8.76995	8.55289	9.21824	9.01993	8.81437	9.67599	8.7203	9.33005	8.62203	8.42553	8.57337	8.78637	8.91967	9.22946	8.85089	9.25241	8.92128	8.47718	8.7727	8.84163	8.89731	8.70819
ABCC10	7.52698	7.4867	7.51886	7.43239	6.62536	7.67007	6.66807	7.5237	6.82198	7.17354	7.86217	7.14173	7.45137	7.21256	7.27449	7.23888	7.37564	7.50628	7.18403	7.68558	7.56117	7.23026	7.31442	7.31455	7.22673	7.20709	7.13216	7.44987	7.48251	7.39041	7.76149	6.63689	7.71035	7.37845	7.39079	7.28779	7.28888	6.99214	7.01051	7.13258	7.82785	7.47113	7.7564	7.57112	6.56524	7.21169	7.0672	7.83811	7.07181
ABCC11	3.29396	3.09113	3.55439	3.16866	3.3151	3.10249	3.21636	3.28503	3.43096	3.09681	3.35676	3.3842	3.04171	3.25719	3.31262	3.51256	3.2319	3.22433	2.96057	2.97244	3.26734	3.29307	2.9417	3.00101	3.13071	3.00513	3.52591	3.1513	3.2789	3.1639	3.11498	3.36766	3.00138	3.11319	3.19399	3.06061	3.24616	3.21639	3.06228	2.79671	3.04573	3.57309	3.02549	3.18228	3.40636	3.28686	3.70642	2.67264	3.19847
ABCC12	2.7016	2.49812	2.27623	3.15523	2.94715	2.43061	2.93736	2.79548	2.61042	2.51362	2.57549	2.73602	2.70661	2.40489	2.70005	2.721	2.59067	2.94723	2.93624	2.57681	2.68173	2.64723	2.58401	2.41225	2.63082	2.4623	2.5728	2.29966	2.54536	2.87177	2.39833	2.84896	2.58519	2.93682	2.80641	2.90182	3.19173	2.7594	2.86068	3.12245	2.54784	2.47533	3.43947	2.74322	3.0968	2.65711	2.80541	2.79878	2.70518
ABCC13	5.62833	5.24431	3.99565	4.82981	5.27625	4.29037	3.40219	4.07676	4.2798	7.55104	3.17837	4.3929	6.57866	4.09076	5.59964	4.0365	3.97458	4.49521	4.78897	4.24095	4.95516	4.73182	6.737	6.442	4.76032	4.39828	5.93848	4.13945	4.48679	4.48841	4.40854	3.9377	3.60719	4.23221	3.0478	3.62503	3.58493	4.12123	3.80885	3.85229	3.91528	4.42399	4.63511	3.55789	6.13811	5.17735	3.62086	5.85476	4.00237
ABCC2	5.53921	5.91477	6.4265	5.94643	6.07224	6.44021	5.79681	6.58048	6.0546	5.73468	6.0376	5.81658	5.15528	6.37194	6.44005	4.84371	6.33542	5.7623	5.14895	5.5452	6.00097	6.15976	5.98832	5.97692	6.10569	6.54589	5.98455	6.23501	6.5272	5.80075	6.03759	5.51791	5.12714	6.08219	5.01943	6.13222	5.88393	5.73973	5.11785	5.66512	6.08954	6.2423	5.15076	6.20414	5.55951	6.10774	5.19386	5.91223	6.10592
ABCC3	5.3785	5.69586	5.35189	5.40018	5.14519	5.54111	5.14439	5.86521	5.04343	5.54885	5.18073	5.4656	6.00515	6.03938	5.85787	5.24596	5.96632	5.15866	5.54881	5.77547	5.65024	5.65069	6.12136	5.94674	5.79714	5.82303	6.10364	5.25288	5.76533	6.11975	5.41919	5.06718	5.38356	5.25504	5.70114	5.75252	6.02024	5.74986	5.33778	5.22702	5.48467	5.29141	4.6595	5.41826	5.16063	5.04029	5.77285	4.84579	6.56722
ABCC4	4.78371	5.54388	5.33136	5.06764	4.83474	5.98878	5.32989	5.20119	5.28193	4.83927	4.97839	5.90925	5.71682	6.14187	6.65063	4.7762	5.19865	4.51389	5.03139	4.8397	4.63561	5.21563	7.51203	5.08146	5.28542	5.53228	5.82632	4.91876	5.43311	5.76075	5.13707	5.55217	5.658	5.96019	5.03456	4.62696	5.69344	5.07264	6.11282	5.31133	4.88035	4.86636	5.14429	4.54211	5.49823	5.17956	5.23783	5.10568	6.52667
ABCC5	7.96762	8.33301	9.72656	9.359	8.2511	7.9291	8.09288	7.72079	7.08769	8.92111	8.51153	8.55608	7.27898	9.02128	9.13246	7.86606	8.58038	8.29168	8.22504	8.31473	8.22005	9.06996	7.92392	8.47839	8.93839	9.00245	9.52576	9.03066	8.61586	7.84324	8.49315	8.90141	7.75782	7.99192	7.67273	8.9862	9.04285	8.98436	8.11068	8.43914	8.3448	8.93486	7.98158	8.66895	9.18568	9.17134	7.78974	7.99407	8.74358
ABCC6 /// ABCC6P1 /// ABCC6P2 /// LOC101930322	4.79713	5.22812	5.34515	5.31523	4.31369	6.12855	4.60971	4.66237	3.88827	4.85748	5.31642	4.56364	6.42311	6.04363	5.47445	4.11973	5.6693	4.13952	3.41183	5.24062	4.37845	6.4332	4.95146	5.89311	6.00653	5.621	5.77083	6.17116	4.57549	6.68123	4.66216	4.34666	5.71853	4.3577	6.84332	5.89048	5.29107	6.23904	4.56073	4.87601	5.4386	5.53356	3.71124	5.34636	3.66709	6.02863	4.40912	4.0452	5.31004
ABCC6 /// LOC101930322	4.77046	4.70797	4.87765	5.21858	4.77522	5.10171	4.69391	4.75518	4.44972	4.44477	4.59201	4.83594	4.84813	5.45741	5.53595	4.69125	5.03132	4.65017	4.361	4.89168	4.47801	5.51822	5.09853	4.61686	5.19048	5.12127	5.57444	5.23148	4.5621	5.11914	4.25411	4.48512	4.93504	4.81473	5.05471	5.24705	5.00041	4.99582	4.36172	4.51949	4.97666	5.11322	4.21334	4.85398	4.85386	5.01787	4.2145	3.95926	4.63293
ABCC6P1	3.27808	3.41951	3.34174	3.54023	4.12299	3.61755	4.20524	3.53455	3.74596	3.14519	3.65897	3.55036	3.13122	3.47815	3.39262	3.17215	4.0047	4.47755	4.0047	3.00168	3.77896	3.59984	3.26975	3.45447	3.35753	3.10656	3.58163	4.06399	3.29641	4.28465	3.01755	3.67728	2.83917	3.86321	3.36467	3.9575	3.82989	4.02624	4.21946	4.40629	3.36148	3.46753	3.89581	3.68571	4.36384	3.01872	4.50957	4.46144	3.52829
ABCC8	4.36519	4.19672	4.1254	4.27766	4.57157	3.79884	4.4661	4.40353	4.14316	4.02839	3.93948	4.57399	3.89462	4.39051	4.36722	3.92556	3.91983	4.22825	4.16329	4.34065	4.00387	4.17661	4.05453	4.14418	4.18696	4.18127	4.58925	4.34495	4.45268	4.0755	4.10778	4.13481	3.88239	4.57942	4.20183	4.4321	4.42138	4.32397	4.15536	4.29042	4.05643	4.77217	4.16399	4.12264	4.1328	3.9655	4.69165	4.05108	4.15157
ABCC9	3.5955	3.35025	2.93603	4.43657	4.60841	2.53974	4.44955	4.05379	4.13278	4.16413	2.50223	4.27935	2.62992	2.50688	2.6521	3.91015	2.94505	4.32484	4.86704	3.01478	3.91398	3.72756	2.74559	3.10741	2.51074	2.8217	3.20517	3.08663	3.29203	2.6928	4.28135	4.82196	2.39039	3.29935	2.63542	4.00421	2.92934	3.91732	4.22889	4.48336	2.73234	2.51498	3.97929	3.09961	4.19139	4.42894	3.71169	3.70916	2.74512
ABCD1	6.44956	6.44932	5.71272	5.29925	5.58863	6.62569	5.79059	5.81727	5.73541	5.43825	6.48139	5.57129	6.97976	6.2253	6.60012	5.86872	6.01432	6.07731	4.85379	6.1745	5.95027	6.37881	6.08545	6.51901	6.50167	5.99991	6.0964	6.74634	6.49944	6.53215	5.89407	4.45198	6.40905	6.02865	6.49469	6.29024	6.52415	6.90976	5.57645	5.28757	6.3495	6.79434	5.65452	6.66346	5.70118	6.45491	5.99681	6.04795	5.98062
ABCD1P2 /// ABCD1P2	4.16346	3.95482	3.98936	4.04571	3.88494	4.03689	3.7165	3.91685	3.84681	3.65866	3.88928	3.79977	3.95599	4.00155	4.05547	3.91015	3.87702	4.03814	3.25175	4.17453	3.62966	4.10063	3.74863	4.04118	3.96374	4.14517	3.98233	4.06688	3.80804	4.05869	3.70802	3.35929	3.90657	3.88139	4.01392	4.14159	4.22539	4.35207	3.02995	3.33805	3.82431	4.02362	3.79841	4.14162	3.79977	3.47762	3.73555	3.74191	3.90216
ABCD2	5.49874	5.47493	5.96256	4.67984	4.26197	5.29714	4.08855	4.9062	4.59898	4.94501	5.1325	3.57602	6.05835	4.79858	4.45645	5.70748	5.26195	4.08454	4.71522	4.74468	4.13208	4.91972	5.66566	4.21668	4.58108	4.69525	4.62969	4.11399	4.5878	4.80954	5.77182	3.92335	5.72939	4.80387	6.22914	3.84262	4.50753	4.0618	4.92682	5.65239	5.57132	4.81058	4.80634	4.49824	4.01232	4.51526	3.56239	6.42286	5.45739
ABCD3	7.28845	7.35032	6.9223	6.85102	7.39047	7.12592	7.38481	7.43968	7.46937	6.98227	7.48897	7.91734	8.0839	6.73651	6.89147	7.47957	7.64004	7.69732	7.76379	7.41552	7.01701	7.48025	7.10672	7.27711	7.00181	7.16169	7.16299	6.92154	6.959	8.16163	7.72325	7.29745	8.11818	6.95287	7.93192	6.83325	6.65156	7.30188	6.99036	7.21493	7.83326	6.71028	6.84659	6.64703	7.47853	7.64156	6.41889	7.01959	7.08322
ABCD4	6.11618	6.39425	6.03341	5.58694	5.13241	6.03991	5.71999	5.74702	5.94771	5.63411	6.04891	5.65171	6.1515	5.96289	5.86245	6.09753	6.23184	5.44151	5.35421	5.85393	6.08685	5.73361	5.99138	5.86094	5.54243	6.09882	5.82127	5.6448	5.60396	5.66432	6.03233	5.48438	5.94327	5.79208	5.87462	5.37359	5.6193	6.00291	5.67134	5.66581	6.17659	5.80206	5.66212	6.0449	5.09332	5.63364	5.70519	6.01369	5.74467
ABCE1	9.76669	9.63141	9.55872	8.80202	9.32787	9.33969	9.26508	9.3715	9.3958	9.70956	9.10136	9.62059	9.90055	8.94856	8.79261	9.78721	9.27369	9.37776	9.7362	9.59277	9.37445	9.2774	9.50857	9.16075	9.11965	8.93559	8.86467	8.84415	9.0694	9.75251	9.67981	9.82933	9.99758	9.47407	10.0566	9.25765	9.11813	9.16835	9.47179	9.67961	9.45798	8.94686	9.80245	8.83344	9.00483	9.19339	9.23776	9.73321	9.55622
ABCF1	9.02813	8.82878	8.55161	7.8174	8.26347	8.71066	8.22862	9.01064	7.97774	8.77412	8.91615	8.4536	9.51142	8.5484	8.5871	8.71135	8.58741	8.79734	8.48006	9.11331	8.73909	8.21423	8.84411	8.66875	8.84746	8.44374	8.21085	8.26888	8.76962	8.90212	8.79403	8.20375	9.25803	8.78422	9.53616	8.97992	8.57288	8.43674	8.40126	8.60516	9.06555	8.27368	9.06911	8.75131	7.50678	8.23044	8.69124	9.00217	8.95212
ABCF2	6.35101	6.35893	6.45341	5.40232	5.85757	6.08381	6.15027	6.11625	5.63464	6.04365	6.12434	5.64568	6.92732	6.05243	6.35055	6.07731	5.77314	5.68961	5.28732	5.98297	5.74507	5.60682	5.91637	5.81105	6.29676	6.07732	5.83156	5.41964	5.74455	6.69315	6.19654	5.47151	6.38411	5.81688	6.76191	5.94347	5.84647	6.00158	6.19099	5.64074	6.54462	6.31976	6.32219	5.82803	5.19611	5.55728	6.22172	6.16164	5.91301
ABCF3	7.698	7.68371	7.48562	6.94606	7.15014	7.46911	7.12691	7.38779	7.07315	7.38472	7.59716	7.15985	7.46144	7.37607	7.55534	7.46214	7.42895	7.65627	7.09086	7.37432	7.46086	7.37231	7.5325	7.40792	7.58721	7.53149	7.29088	7.23168	7.31245	7.30647	7.35442	7.09874	7.60495	7.43753	7.69069	7.29415	7.34868	7.24659	7.19054	7.05734	7.72686	7.30792	7.70668	7.34042	7.02129	7.07183	7.35154	7.21677	7.36655
ABCG1	7.48093	7.80662	8.07508	7.50921	8.99476	8.30537	7.64783	7.57836	7.96973	6.2249	7.85618	8.54889	6.50366	8.84188	9.11561	7.60494	8.30415	8.26151	7.55364	7.66053	7.38284	8.13224	8.54976	7.45233	8.22131	7.28866	6.96275	9.01056	9.2589	6.03643	7.65822	7.18237	6.73839	8.53705	6.86823	8.53509	9.07379	8.9603	8.12925	7.98017	7.64944	8.71239	7.22842	8.60471	8.56941	8.78843	8.28604	8.548	7.9931
ABCG2	4.77366	5.20151	4.1638	4.13814	4.64724	4.7414	4.2064	4.36114	4.09364	5.2174	4.08247	4.96305	7.97047	4.50797	5.18012	4.36905	3.74939	4.13874	4.50503	4.4229	4.089	4.02058	7.35831	5.25952	3.99677	4.12122	6.26359	4.58879	4.63606	5.42343	4.80945	4.74394	5.7524	4.81607	4.17206	4.13094	4.51941	3.66546	4.50821	4.31205	4.4272	4.44122	5.05903	4.30752	4.58879	4.02488	4.44607	5.12175	4.44552
ABCG4	4.23805	4.16167	4.01366	4.41904	4.10129	4.11586	4.54712	4.14392	4.35338	4.11251	4.24294	4.44335	4.18017	3.94035	4.43794	3.97439	4.05011	4.73788	4.3427	3.9625	4.31321	4.29719	4.03497	4.25974	3.99864	4.09677	4.45646	4.27903	4.38376	4.16934	4.22374	4.48745	4.08225	4.42886	4.2834	4.08993	4.44857	4.61242	4.4322	4.41843	3.95839	4.36201	4.46159	4.31863	4.18897	4.45246	4.35927	4.35327	4.20941
ABCG5	3.51793	3.61913	3.59216	3.9951	4.64698	3.8038	3.95586	4.06328	4.23484	3.39119	3.48225	4.24238	3.98777	3.89225	3.85684	4.04587	3.74939	4.52423	3.81352	3.41861	3.81849	3.87167	3.58899	3.71343	3.9662	3.68808	3.80038	3.86562	3.87203	3.91126	3.46024	4.04483	3.89002	4.14704	4.03629	3.63215	3.96831	4.26053	3.66758	3.95231	3.90401	3.91765	4.73271	3.80897	3.91442	4.09997	4.14368	3.90077	3.80414
ABCG8	3.73624	3.67721	3.37597	3.72905	3.60322	3.72193	3.60344	3.5971	3.81087	3.5511	3.65717	3.89619	3.07085	3.62877	3.686	3.43891	3.60745	3.82081	3.77278	3.23728	4.0934	3.88938	3.48453	3.75855	3.43686	3.64096	3.91331	3.99429	3.68221	3.82901	3.59875	3.64767	3.31385	3.77364	3.6808	3.96891	3.76286	4.12369	4.17755	3.84727	3.78496	4.07326	3.99226	3.99567	3.69844	3.51307	3.88939	3.80038	3.51614
ABHD1	3.37238	2.66225	2.94526	3.27512	2.73217	2.85752	2.68398	2.73217	2.67291	3.00088	3.67328	2.80674	3.41002	3.13928	3.23396	2.77301	2.94203	3.2196	2.87918	3.95732	3.2693	2.84644	2.81509	2.91776	2.87127	3.24961	2.86304	3.14175	2.93433	2.9893	3.20616	2.69177	3.59203	2.64392	3.35862	3.04611	3.01742	3.47078	2.54412	2.87311	3.23022	3.23625	3.41422	2.91968	2.6918	2.47452	2.75914	2.99284	2.73944
ABHD10	8.40503	8.38508	8.52533	7.91678	8.47859	8.65824	8.2144	8.28717	8.44587	8.61868	9.10576	8.00089	8.72325	8.13698	8.25332	8.64117	8.40378	8.55151	8.68586	8.54708	8.3948	8.4633	8.48397	8.4081	8.35818	8.29562	8.04093	8.26244	7.47691	8.74066	8.71597	7.91798	9.08352	7.59569	8.75736	7.81025	7.64983	8.42983	7.84581	8.3171	8.55533	7.63789	7.95901	8.22072	7.73723	8.70816	7.98096	8.35556	8.38132
ABHD11	5.11444	5.13624	5.23945	5.59551	4.73335	5.65148	4.82863	5.42546	4.96637	4.81912	5.40243	5.39518	5.76316	5.61238	5.30539	5.39979	5.12896	4.99207	5.23179	5.52913	4.52704	5.35345	5.14622	5.70809	5.63131	5.80677	5.85015	5.35236	5.11349	5.78167	5.42339	5.21897	5.77851	5.28747	5.49334	5.27168	5.62975	5.49897	4.60913	5.47922	5.73751	5.4553	5.34786	5.53682	5.3159	4.88043	5.14749	5.22332	5.49049
ABHD12	5.70564	5.41361	5.66812	4.90231	4.40086	5.5914	4.78935	5.27509	4.96077	5.58906	6.37944	5.02715	6.31712	6.24886	5.98362	5.25196	5.62223	5.21301	5.44999	5.67438	5.86826	5.52251	5.25135	6.14097	5.43563	5.13882	5.51748	5.40668	5.30041	6.54006	5.80745	6.02945	6.47098	5.55329	6.74778	5.53075	5.07893	5.44136	6.1039	5.02613	5.79804	5.31145	5.28899	5.60801	4.88369	5.20471	4.89485	5.53807	5.46804
ABHD12B /// MIR4454	2.77311	2.95617	3.50868	4.31182	3.81914	3.54395	3.64041	3.08868	3.4288	2.98933	3.21547	3.23216	2.6597	3.72413	3.32578	3.2632	3.2538	3.40048	3.0896	3.04436	3.11872	3.82137	2.85913	3.64618	3.12045	3.46356	3.90796	3.79404	3.70218	3.02476	3.01755	3.78959	2.96517	2.91434	2.81182	3.46656	3.40475	3.22413	3.0885	3.27047	3.29631	3.63544	3.52684	3.44428	4.19566	3.33466	3.40449	3.53307	2.77196
ABHD13	6.68315	6.91245	6.93844	7.339	6.13453	6.81778	5.77559	6.61801	5.85222	6.22126	7.4272	6.06808	7.20764	6.80185	6.98211	6.36053	6.84462	6.28941	6.00341	6.69557	6.73081	6.94243	6.79014	7.21988	6.76647	7.29592	7.26806	6.84467	6.7827	7.58671	6.75934	5.51839	6.82172	6.25812	7.00136	6.25552	6.60968	7.45716	5.53687	6.41165	7.16389	6.75924	5.87107	6.68359	6.67248	6.85223	5.84492	6.60736	6.72001
ABHD14A /// ACY1	6.84418	6.50225	6.18909	5.49748	5.3296	6.22294	5.23029	6.26446	5.10102	6.18063	6.3884	5.65847	6.95144	5.73205	5.83072	5.99351	5.92309	6.02315	5.41503	6.0137	6.24384	5.06152	6.25666	5.11939	5.54729	5.92439	5.78572	5.6181	5.84612	6.75628	6.30761	5.52326	6.29476	6.15231	6.91051	6.04126	5.5721	5.55568	5.2887	6.1855	6.20059	6.08311	5.72301	5.54028	5.71046	5.02047	5.39425	6.735	6.24725
ABHD14A-ACY1 /// ACY1	5.97832	6.07441	5.60531	5.29262	5.22107	5.90379	4.82618	5.54399	5.90716	5.5446	5.66752	5.39559	7.2873	5.76971	5.75731	5.84419	5.48468	5.41968	5.20145	5.77065	5.64201	6.00319	5.60046	5.61703	5.67653	5.16585	5.48577	5.57625	5.34969	6.32144	5.84569	4.30897	6.6126	5.69424	6.81229	5.93061	5.26203	6.02202	5.31449	5.22884	6.23153	5.74489	5.4525	5.49946	4.59148	5.47806	4.85197	5.46796	6.01198
ABHD14B	9.2173	8.98128	8.96788	7.97201	8.19594	8.73466	8.37219	8.81556	8.29444	8.79528	8.73548	8.01941	9.90933	8.40321	8.60207	8.92791	8.62258	8.6641	8.08476	8.95496	8.82537	8.32003	8.79484	8.42037	9.07709	8.48521	8.37069	8.34339	8.21433	9.42411	8.89062	8.11556	9.12731	8.85609	10.1097	8.54035	8.51926	8.45672	7.80258	8.68266	9.10137	8.51067	9.34092	8.33947	7.58248	7.80808	8.43377	9.13223	9.17332
ABHD15	7.04383	7.05119	6.69851	5.23704	6.08115	6.78242	5.36098	6.55579	5.29306	6.57972	6.83003	5.56318	7.29096	6.10966	5.74329	6.68335	6.59354	6.28009	6.1614	7.16922	6.62437	5.90261	6.62794	6.31378	6.88858	6.4894	5.834	5.92221	5.78767	7.21923	6.81787	5.11451	6.99434	6.84801	7.69273	6.15962	6.17621	6.40523	6.00784	6.36244	7.04931	6.25453	6.95968	6.35328	5.03383	6.18211	6.51131	6.65964	6.65254
ABHD16A	6.93319	7.16205	7.02599	7.45266	7.19015	7.52353	7.4029	7.47076	7.02722	7.1539	7.41295	7.15792	6.90952	7.5033	7.50685	7.09563	7.35651	7.31651	7.2206	7.23939	7.30649	7.3189	7.27215	7.50814	7.41879	7.5453	7.64119	7.7429	7.63466	6.83523	7.22686	6.90168	7.0378	7.12867	7.06016	7.33017	7.70295	7.491	7.35	7.01692	7.41455	7.35285	7.01737	7.6022	7.39666	7.31908	7.3026	7.14982	7.30586
ABHD16B	4.43932	4.69911	4.76749	4.56078	4.39576	4.67991	4.21018	4.83174	4.2624	4.16811	4.57652	4.39382	4.89299	5.05203	5.00715	4.32925	4.62361	4.66518	4.31934	4.69856	4.16502	4.61617	4.63342	4.80279	4.67217	4.8647	5.02428	5.21907	4.50217	4.8388	4.08635	4.37402	4.56916	4.40066	4.84379	4.12882	4.94866	4.9688	4.29793	4.52575	4.44971	5.18706	4.26016	4.79763	4.42528	4.77434	4.55956	4.39437	4.7361
ABHD17A	6.66675	6.60446	6.54154	6.69461	5.84371	6.48746	6.05159	6.48453	5.89098	6.73954	6.78371	6.34658	7.01679	6.22785	6.27944	6.28443	6.51031	6.21515	6.35654	6.73663	6.77247	6.21368	6.52029	6.48294	6.8509	6.66377	6.71866	6.22003	6.31623	7.10214	6.93107	5.75346	6.75124	6.40746	7.31306	6.40485	5.9562	6.72057	6.18342	6.45198	7.14335	6.88859	6.67201	6.43987	5.99991	6.46776	6.19113	6.66157	6.82114
ABHD17B	4.78095	4.67116	4.34759	4.77195	4.33318	5.25133	5.37582	4.75373	4.34199	4.4345	5.02122	5.00926	4.81461	4.92042	4.36717	4.82504	4.59772	4.64052	5.50053	4.33644	5.18159	4.84913	4.82263	4.73544	4.53394	5.0356	4.86349	4.60788	4.50633	4.79802	4.8842	5.95512	5.03892	4.57463	5.50148	4.71215	4.70914	4.74149	5.72311	5.79503	4.75691	4.94529	4.98665	4.31915	4.66944	4.86498	4.79852	4.53471	4.68615
ABHD17C	4.24337	5.16219	4.43906	5.64791	4.53191	5.02652	4.68627	4.78527	4.59945	4.77688	5.56192	5.73959	4.75134	6.06587	6.59633	4.21855	4.9154	4.14015	4.83754	5.29482	4.62329	4.78387	4.21033	4.91943	5.77456	5.42337	5.96002	4.25837	4.62119	5.51445	5.29957	5.28487	5.63377	4.23555	5.34612	4.3364	6.33683	6.83383	4.86781	5.2361	5.4448	5.24119	4.90589	5.27344	4.58748	4.94969	4.36933	5.31276	4.90963
ABHD2	8.58746	8.59004	9.01737	9.66376	8.47458	8.56884	8.5653	8.65503	8.71632	9.01434	9.33119	7.99559	7.86655	9.07301	9.03757	8.49567	8.55884	8.89442	8.22953	8.37678	9.53175	9.07179	8.45374	8.7978	9.18195	9.38635	9.43102	8.87711	8.86477	8.45255	8.51272	8.57229	8.19858	8.64404	8.25191	9.00734	9.03704	9.17259	8.5532	9.12382	8.81489	8.98511	8.38121	9.14072	9.28998	9.03834	8.64127	8.18457	8.72456
ABHD3	10.4255	10.6961	10.5206	10.5824	10.9722	10.7069	10.8991	11.0711	11.3331	10.4974	10.6777	10.7724	9.44696	10.8202	10.9345	10.5287	10.4794	10.7942	10.4369	10.4691	10.568	10.5446	10.6012	10.6718	10.8628	10.9068	10.9088	10.5724	11.0325	9.09904	10.5539	10.5414	9.61667	10.4869	9.38202	10.7905	10.8035	10.6475	10.7845	10.3721	10.1228	10.5983	9.87463	10.6855	11.2424	10.7125	10.6907	10.8554	10.7137
ABHD4	6.80577	6.86658	6.85647	6.90325	6.77778	6.86253	6.31585	7.04049	7.08392	6.38191	7.28303	6.68004	6.82233	7.36958	7.39799	6.07956	6.82276	6.91965	5.87401	6.26748	6.71265	6.6912	7.13591	7.00884	7.1448	7.00074	7.37408	7.48036	7.39543	6.24542	6.37073	6.30889	6.51554	6.37472	6.8567	7.28453	7.14334	7.0608	5.84868	6.61404	6.93593	7.02776	6.50592	6.76837	6.92449	6.9079	7.13902	6.44584	7.38591
ABHD5	8.46222	8.65494	9.16385	9.74678	9.58639	8.91957	9.24602	9.04927	9.40133	8.79227	8.83831	8.77562	7.33979	9.3484	9.4177	8.21654	9.00929	8.82987	8.4496	8.74878	8.9982	9.38496	8.59246	9.07034	9.48718	9.33258	9.53323	9.89048	9.35666	8.82791	8.75623	8.63475	7.73137	9.1158	7.87831	9.22662	9.33282	9.53623	9.00455	8.6495	8.60836	9.43529	7.85256	9.57577	10.1091	9.7252	8.93187	8.42944	8.72152
ABHD6	5.94308	5.82913	5.59634	5.54331	5.64673	5.95011	5.8536	5.81663	5.80222	6.13317	5.88915	5.61455	6.70032	5.90114	5.83133	6.24977	5.27067	5.62678	5.72255	6.23362	6.24773	5.97286	5.75873	5.55234	5.95113	5.696	6.45798	5.77799	5.54315	7.12823	6.3428	5.46537	6.50404	6.05872	7.07972	5.99676	5.62887	6.33589	5.62249	6.06193	6.19086	6.18971	6.03971	5.63825	5.21464	6.08206	6.24728	5.55427	6.04204
ABHD8	4.32874	4.14639	4.50002	4.10053	3.99963	4.20575	4.1991	4.20152	3.91147	3.7836	4.36605	3.38367	4.67917	4.29768	4.39236	4.24986	4.5393	4.25465	3.80304	4.1444	4.09746	4.14344	4.1034	4.33454	4.60038	4.6074	4.62868	4.60711	3.76044	4.86089	3.77125	4.23329	4.15276	4.20344	4.26242	4.36181	4.56973	4.16436	4.09035	3.86073	4.00512	4.6573	4.07043	3.86954	4.5332	3.20386	3.70399	3.93971	4.1678
ABI1	9.70652	9.94769	10.0261	10.1509	10.1289	10.1393	10.0705	9.97426	10.0492	9.98811	10.0047	9.96219	9.50688	9.99792	9.89044	9.84286	9.91893	9.70925	9.7013	9.81373	9.85104	10.0715	9.89916	10.0206	10.025	10.208	10.1869	10.1722	10.1686	9.79282	9.95728	9.79447	9.72483	9.84909	9.64348	9.73271	10.1349	10.1745	10.1959	9.79065	9.8365	10.2016	9.36767	9.95988	10.4071	10.2549	9.98949	9.88135	10.1379
ABI2	5.5467	5.57195	4.91502	4.59184	4.8312	5.31959	4.85325	5.30336	4.62882	4.84353	5.08152	4.91215	5.64903	5.2266	5.12048	4.67272	5.02071	5.02758	4.83907	5.20637	5.20454	5.04432	5.40258	5.10948	5.86466	5.31709	5.02746	4.72812	5.41107	5.51385	5.18988	5.07699	5.88369	4.86851	5.57678	5.27213	5.00125	5.10396	5.00921	5.11637	4.84652	5.02539	5.85034	5.03243	4.89055	4.97597	5.42104	5.30406	5.31894
ABI2 /// RP11-363J17.1	4.42401	4.08402	4.17597	4.55103	5.60423	4.74266	6.16322	5.82491	5.88475	5.03063	3.83141	5.51901	4.60438	4.47822	4.91921	5.02691	4.52711	4.83224	6.48902	4.71855	4.67082	4.46306	4.79088	4.00399	4.64244	4.85519	4.75525	4.22367	5.56096	4.29399	4.70731	7.04175	4.63013	5.06445	4.21718	5.77985	5.52726	4.68031	6.10246	5.29343	4.74266	4.33344	5.96145	4.74266	6.05047	5.39671	5.95807	5.67824	5.09231
ABI3	8.77179	8.30351	7.95184	7.83053	7.86946	8.47326	7.87827	8.41642	7.85424	8.33276	8.23926	7.80494	9.43739	7.85692	7.98966	8.78826	7.75714	8.0343	8.65415	9.08578	8.61561	8.36515	7.84881	8.85611	8.33175	8.16017	7.71017	8.30465	7.49716	8.73858	9.00526	7.82179	9.58054	8.59555	9.65908	8.28582	7.0993	8.22801	8.4027	8.3224	8.73795	8.5587	8.47856	8.11508	7.26951	8.63807	8.42601	8.23091	7.99126
ABI3BP	2.48718	2.61279	2.91084	3.29092	2.81608	3.21337	3.0956	2.5423	2.57098	2.47815	2.47674	2.53075	2.42405	2.62172	2.50734	2.67245	2.38157	2.80316	3.24074	2.52988	2.66027	2.74236	2.50739	2.38121	2.32562	2.39009	2.41319	2.38833	2.70498	2.54689	2.7046	3.37545	2.34994	2.96529	2.51346	2.96277	2.45482	2.58747	2.95165	2.86336	2.33182	2.69252	2.61007	2.76906	2.95946	3.1297	2.71721	2.79483	2.83779
ABL1	7.2756	7.23655	7.36501	6.63348	6.43108	7.48807	6.48242	7.0921	6.95894	7.08346	7.29485	6.76632	7.61583	7.07288	6.99374	7.16329	7.11431	6.99975	6.84648	7.19699	7.11201	6.972	7.20297	7.07459	7.26424	7.14482	7.00942	6.89459	6.96011	8.00059	7.36055	5.85809	7.82167	7.44524	7.8517	7.02988	6.84521	6.97078	6.82007	6.76998	7.41647	6.97344	6.96467	7.05193	6.17864	7.04331	6.52383	7.12198	7.16578
ABL2	7.90665	7.84595	7.81175	7.75955	7.50841	8.0576	7.28504	7.37708	7.63778	7.32046	7.28405	7.61437	8.01672	7.63709	7.80423	7.6878	7.61596	7.41576	7.11426	7.49443	7.77901	7.86707	8.02218	7.72905	7.66158	7.67025	6.91955	7.98087	7.37813	7.68538	7.7478	7.05477	7.94292	7.44248	8.36418	8.07906	7.73625	7.30122	7.49729	7.65937	7.85643	7.58426	6.51099	7.52528	7.13641	7.56888	7.65485	7.56897	7.62282
ABLIM1	11.7418	11.7464	11.6081	10.0724	10.9658	11.1717	10.7991	10.7863	10.7796	11.3641	10.8574	11.2982	11.0727	10.9716	10.7921	11.7738	11.1	11.3003	11.5411	11.5661	10.7636	10.6307	11.8689	10.5421	10.5677	10.5991	10.296	10.0657	10.7402	11.1027	11.2562	11.2262	11.2412	10.9455	12.0894	10.8519	11.1584	10.54	10.6613	11.4411	11.4084	10.0525	11.3637	10.72	10.6913	9.87541	10.6963	11.5307	11.4231
ABLIM2	4.42546	4.21369	4.10129	4.08847	3.38823	3.89476	3.68768	3.95816	3.76104	4.05793	4.17918	3.69166	4.12465	3.90503	3.91343	4.0724	3.96039	3.91827	3.8583	4.01634	4.13087	3.51224	4.09322	3.91485	4.4206	4.09215	3.7453	3.88904	3.97446	3.94995	3.94946	4.28767	3.85861	3.91835	3.78499	3.73257	3.94107	3.73164	3.21179	4.16753	4.4491	4.06209	3.85898	3.72252	3.39467	3.67162	3.81471	4.04724	4.18538
ABLIM3	7.46612	7.89629	6.37313	7.91784	8.01395	8.13539	7.10812	7.76106	7.17287	7.78174	6.96107	8.25409	7.99496	8.3452	8.18912	5.69711	8.62153	7.8208	6.59317	6.95618	7.00142	7.61281	9.34569	8.38958	8.62612	8.57887	8.73062	7.04517	8.40133	7.75856	5.91217	6.83363	7.07893	7.34788	7.32558	8.41512	8.82729	8.33043	8.28695	7.13815	7.02461	7.07139	6.38013	7.95156	8.12722	6.29332	8.10144	7.51623	9.24253
ABO	5.37179	5.1876	5.35528	5.35379	5.71173	5.31881	6.19299	5.88753	5.549	5.3453	5.42178	6.05101	5.12069	5.72267	5.68279	5.52871	5.27074	5.6077	5.55804	5.6755	5.20376	5.64609	5.18347	5.22272	5.4503	5.45578	5.84352	5.42949	5.77881	5.3502	5.39804	6.09103	5.17708	5.9078	5.82571	5.86794	5.9181	5.69956	5.97815	5.42464	5.36459	5.87315	6.38312	5.71127	5.49953	5.43422	5.99824	5.65737	5.33497
abParts /// IGKC /// IGKV4-1 /// IGKV4-1	8.645	8.02243	7.28472	7.59702	7.09614	8.05484	7.89316	7.1823	6.27476	6.77284	7.69498	10.0905	9.16905	8.65365	7.85207	8.96252	8.40995	7.09878	7.49558	8.15299	9.07401	6.68963	10.878	7.61217	7.2303	5.61885	6.53013	7.13475	8.01326	9.28632	8.17587	7.57501	10.9211	6.25288	8.06159	7.02188	5.73233	6.91234	8.34998	7.69707	6.86195	9.15735	7.75512	6.38005	5.85422	6.42332	7.87096	9.26344	9.17019
ABR	7.36021	7.28725	7.44592	7.21802	7.09957	7.58249	7.20399	6.98066	7.03233	7.14475	7.48099	7.01851	7.07856	7.39667	7.70023	7.1456	7.4587	7.15587	7.35274	7.25467	7.46449	7.6481	7.55612	7.39297	7.64555	7.68158	7.74151	7.72292	7.40428	7.36289	7.29141	6.81439	7.51077	7.42943	7.44639	7.30127	7.51187	7.81332	7.13528	6.93733	7.56435	7.93471	6.94381	7.50159	7.19703	7.40724	7.34795	7.26135	7.49583
ABRA	3.58499	3.77666	3.71894	3.40759	3.19157	3.9249	3.34725	3.30824	3.18273	3.82464	3.28777	3.47707	3.89746	3.85597	3.809	3.65122	3.4169	3.53486	3.80032	3.75544	3.53104	3.77001	3.57221	3.61634	3.53582	3.55532	3.56795	3.49531	3.24235	3.61159	3.56559	3.34323	3.82068	3.49071	3.89047	3.77659	3.05642	3.66316	3.33365	3.55894	3.43959	3.46118	3.01652	3.58444	3.32215	3.52211	3.41645	3.8277	3.5417
ABRACL	11.8735	11.8196	11.6833	11.2959	11.3086	11.8514	11.4341	11.5779	11.6366	11.6246	11.7824	11.5891	12.2732	11.5605	11.4982	11.9638	11.907	11.4785	11.5994	11.8273	11.4672	11.3754	11.7882	11.7788	11.6119	11.4488	11.3317	11.5703	11.5912	12.1086	11.6662	11.4607	12.141	11.6217	12.1667	11.7773	11.7974	11.8412	11.7231	11.5462	11.5286	11.6953	11.6433	11.617	11.2096	11.7944	11.6272	11.9125	11.446
ABT1	7.74751	7.47062	6.96922	6.89953	6.56779	7.33638	6.82083	7.32125	6.40725	7.36194	7.68049	7.18608	7.9631	7.16838	7.15537	7.28476	7.41379	7.27076	6.79002	7.40552	7.47755	7.27599	7.37179	7.39433	7.63702	7.44161	7.38499	6.99229	7.10943	7.95013	7.49211	6.31489	7.85573	7.27862	8.36799	7.17748	7.30525	7.58909	6.86396	7.29532	7.7795	7.46454	7.23247	7.16446	6.53755	7.35959	6.88852	7.49324	7.71361
ABTB1	8.08806	7.97075	8.21555	9.04943	8.14854	8.17951	8.116	8.07546	8.10018	8.23003	8.46943	8.11957	7.13675	8.69637	8.96988	7.36334	8.22407	8.39083	7.51475	7.75775	8.68264	8.6242	8.25989	8.50002	9.03327	9.07483	9.46091	8.87291	8.44526	7.38032	7.72486	8.27933	6.62763	7.95162	6.69056	8.11695	8.88793	9.35733	8.23815	8.09436	8.24199	9.27293	7.66769	8.57839	9.16832	9.05721	8.33517	7.56458	8.68481
ABTB2	4.61516	4.52629	4.25825	4.85381	4.5364	4.70404	4.72378	4.91857	4.3808	4.27097	5.55954	4.60794	4.33912	4.91167	5.07522	4.44137	4.65928	4.39078	4.20779	4.84365	4.11184	4.73704	4.55271	4.9687	4.72206	4.82189	4.98888	5.14858	5.07342	4.97068	4.65171	4.15874	4.72386	4.39037	4.82403	4.68356	4.96821	5.0977	4.51513	4.37725	4.4876	4.97224	4.57897	5.43553	4.1365	4.73362	4.53566	4.30276	4.439
AC000111.3	2.03366	1.81096	2.14021	2.62321	2.77777	1.92397	3.43225	2.62638	4.19273	2.54804	2.07335	3.87673	1.76864	2.03299	1.89849	2.9583	2.08871	3.40347	3.69493	1.80916	2.48411	1.99344	1.83901	2.31354	1.89836	1.96327	1.63966	2.43645	2.14377	1.91337	2.28451	4.37797	1.8632	2.40887	2.1663	2.36258	2.05406	2.44512	3.80215	2.0335	2.09609	2.54005	2.32601	2.24042	3.7276	2.53481	2.76583	1.93485	2.17581
AC002059.10	2.92254	3.25715	3.80544	3.69724	3.65882	3.49886	3.69555	3.28962	3.47667	2.88979	3.63249	3.56507	3.59931	3.68137	3.89957	3.23828	3.9259	3.79761	3.39663	2.9616	3.23676	3.43198	3.67225	3.4383	3.46899	3.28469	3.37574	3.55534	3.97365	3.27108	3.67636	3.71675	3.74506	3.37692	2.66143	4.01505	3.08408	3.75152	3.21986	3.37612	3.47667	3.71765	3.16435	3.46465	3.33036	3.49438	3.47512	3.13907	3.47667
AC002064.5	2.51195	2.17509	2.30694	2.60697	2.12854	2.17349	2.54497	2.2101	2.13517	2.20264	2.30422	2.47101	2.50322	2.40218	2.14482	2.5011	2.1284	2.22378	2.4491	2.28811	2.31815	2.2782	2.25838	2.06143	2.20808	2.12702	2.44304	2.20932	1.93483	2.27572	2.24146	2.16762	2.2924	2.23893	2.57969	2.50251	2.13397	2.46727	3.15918	2.39673	2.52304	2.34624	2.01379	2.24042	2.07909	2.72653	2.36029	2.51861	1.66402
AC002310.12 /// AK056973	8.11009	8.12342	8.28765	8.16662	8.25903	7.95973	8.78163	8.45108	8.59765	8.29004	7.94837	8.56696	8.15425	8.0524	8.27602	8.21838	8.07227	8.45524	8.46781	8.45348	8.09883	8.00234	7.97622	7.67097	7.98884	7.95343	7.96602	8.44296	8.23483	8.36867	8.14015	9.45899	7.93673	8.81308	8.26608	8.53124	8.08557	8.02694	8.84936	8.62807	7.97056	8.05342	9.13762	8.20238	8.62391	8.17571	8.94935	8.29766	8.23283
AC002310.7 /// ZNF785	3.7276	3.33507	3.26676	4.09817	3.72513	3.56901	4.05558	3.70229	3.87446	3.64785	3.7424	4.13632	3.73904	3.97687	3.69923	3.28248	3.77558	3.93792	4.23166	3.70958	3.77654	3.59366	3.63833	3.66223	3.66399	4.02389	4.28989	3.65161	3.59746	3.67857	3.78051	3.53848	3.7546	3.64022	3.76027	3.7718	4.08397	3.83879	3.97485	3.45284	3.52667	4.23053	3.69438	3.84866	3.72683	3.61179	3.87953	3.31111	4.18224
AC003973.4	1.97921	2.08789	2.39791	2.01797	2.22803	2.1526	2.82446	2.16063	2.63363	2.47469	2.28757	2.54789	2.29343	2.31219	2.23536	2.25552	2.34931	2.76446	2.46485	2.28629	2.30301	2.52593	2.24304	2.31827	2.08414	2.15509	2.57254	2.61754	2.17357	2.49027	2.09218	3.09459	2.16402	2.00331	2.7773	2.10641	2.45821	2.58191	2.85473	2.73087	2.47901	1.98905	2.32166	2.03827	2.40197	2.29996	2.36601	2.60014	2.30078
AC003986.5 /// BC043576	4.76872	4.43493	4.74527	4.844	4.5601	4.61617	4.61708	4.31679	4.48922	4.77626	4.28898	4.90618	4.62837	4.58039	4.63199	5.02834	4.40053	4.58247	4.60751	4.61708	4.66262	4.62816	4.3668	4.56913	4.26961	4.65109	5.18709	4.49689	4.72338	5.20681	4.57304	5.24544	4.48714	4.62797	4.73472	4.83121	4.76873	4.77785	4.68831	5.02127	4.41699	4.84107	5.00805	4.77785	4.66211	5.0819	4.61501	4.54939	4.62777
AC003989.4	3.64038	3.31729	3.36402	4.38969	3.92957	3.37575	5.25442	3.94518	3.91769	4.79166	3.5565	4.91457	3.72667	3.30893	3.87291	3.98276	3.50622	3.52286	6.80572	3.89414	5.07864	4.19764	3.51992	3.439	4.07051	3.81254	3.77991	4.16592	4.07844	2.9551	4.77046	5.7537	3.44872	3.98436	3.2837	4.39732	4.10607	3.69398	5.6278	5.11128	3.47417	3.74583	5.1948	3.68296	6.41132	5.77405	4.06821	3.81133	3.52319
AC004158.3 /// AK055364	2.60931	2.45476	2.5392	2.77869	3.04313	2.31097	3.77708	3.32847	2.95075	3.82193	2.61042	3.46112	2.57408	2.29983	2.47939	2.40281	2.79323	3.01409	3.54903	2.70568	2.96488	2.93011	3.08023	2.58885	3.30652	2.44475	2.52883	2.78031	2.6135	2.63251	3.01763	4.3819	2.44188	2.35112	2.4523	3.02354	2.75522	2.48304	3.90349	2.8654	2.73903	2.56625	2.82929	2.5322	4.39466	3.8367	2.6941	2.55053	2.7384
AC004490.1 /// AX746733	4.72617	4.95799	4.15636	4.58479	3.65163	4.31748	4.48019	4.80825	3.92079	4.20544	4.68031	4.13915	4.58274	4.12612	4.51136	4.06562	4.6612	4.48317	4.54245	5.17164	4.55173	4.47413	4.66214	4.36736	4.49565	4.67869	4.47901	4.37708	4.46678	4.80603	4.26939	4.39583	4.9516	4.58396	5.14107	4.62734	4.50567	4.77547	4.14138	4.23401	4.00446	4.81973	4.54177	4.48125	4.30466	3.8917	4.21018	3.95637	4.25216
AC004538.3 /// BC040327	3.20583	3.58684	3.35842	5.54569	6.02377	3.7471	5.19453	4.36542	6.5951	5.05907	3.16403	5.66572	3.26154	2.97325	2.79009	4.00594	3.34782	5.81219	6.78846	4.39836	4.09819	3.54552	3.0955	3.29003	3.13717	3.3548	3.53503	3.76076	3.75575	3.40589	4.97583	5.93851	3.18859	3.53512	3.61653	3.92021	3.55832	4.47091	5.2001	4.23546	3.30567	2.85715	4.2986	3.39905	6.2935	5.64087	4.24373	3.63215	3.20269
AC004692.5	7.43998	7.28587	7.48012	7.14697	7.47938	6.89419	6.80417	7.65918	7.33931	7.40336	6.75998	7.1277	7.6217	7.16026	7.18022	7.5456	7.13159	7.59875	7.06162	7.30686	7.07005	7.02741	7.0222	6.98884	7.30815	7.19956	7.25149	6.99565	7.25188	7.29334	7.17248	7.17097	6.99003	7.4025	7.46092	7.41819	7.22892	7.50007	7.33512	7.47796	7.26443	7.10191	7.89276	7.21946	7.05569	6.93713	7.5332	7.38976	7.4732
AC004941.5	10.0908	10.1526	10.0367	10.2211	10.7213	10.3517	10.4818	10.506	10.5549	10.0237	10.1696	10.3805	9.32303	10.4666	10.7962	10.0733	10.0141	10.5553	10.1607	10.2906	10.3345	10.356	10.3128	10.4493	10.3051	10.2578	10.4044	10.6773	10.6342	9.47257	10.1451	10.1421	9.79359	10.4034	9.45267	10.5162	10.4945	10.4401	10.5824	10.0391	10.0442	10.8085	10.3388	10.7104	10.6806	10.4513	10.6365	10.336	10.13
AC004951.6 /// AX747182	7.88473	7.90681	8.30466	8.25188	8.63606	7.8247	8.24152	8.20667	8.27853	8.19842	7.62721	8.81327	7.77201	7.99037	8.08209	8.78619	8.08543	8.15619	8.25927	7.96045	7.84563	7.92405	8.08831	7.90155	7.81823	7.73471	7.72515	8.11714	8.32973	7.35224	7.988	8.84304	7.93519	8.52041	7.37642	8.58382	8.11049	6.95135	8.20187	8.51277	7.79092	8.28555	9.47867	8.04676	8.42242	7.80524	9.25706	8.50781	7.62797
AC005162.4	3.58291	2.90128	2.95312	3.51445	3.34145	2.83914	3.99212	3.39409	3.56757	3.31849	3.00657	4.16708	2.96763	3.01459	2.89201	3.91417	3.04397	4.0304	3.27423	3.15149	2.71398	2.98174	2.82863	3.24062	3.09313	3.18531	3.78825	3.21486	3.18612	3.25976	3.04433	4.27624	3.3174	3.52173	3.07793	3.25157	3.54322	3.50569	4.013	3.09868	2.95892	3.35485	3.59839	2.65038	3.58965	2.85474	3.08415	2.97352	3.40916
AC005224.2	5.29728	5.24304	5.439	4.59286	4.64099	4.94382	4.74192	4.75048	4.70105	4.83142	4.9936	4.50835	5.4873	4.97707	4.44856	5.3048	4.43359	4.54876	3.63186	4.94056	5.03464	4.39908	5.35269	4.82707	4.38842	4.25857	4.74622	5.38369	4.14019	4.67339	4.66256	5.08488	5.58736	4.91983	4.56923	4.58393	3.3943	3.30216	4.26908	4.78831	5.5689	4.98269	4.29031	4.67076	4.74779	4.50912	4.19819	3.8928	4.90951
AC005256.1	4.85361	4.42353	4.42535	4.46716	4.42405	4.53397	4.73797	4.76534	4.66847	4.59416	4.65027	4.88968	4.54384	4.90683	4.60978	4.56285	4.67141	4.71341	4.85325	4.34449	4.7051	4.49921	4.3668	4.28707	4.59831	4.81559	4.60435	4.89577	4.36031	4.50963	4.28645	3.97229	4.2297	4.60985	4.51399	4.49494	4.89064	4.86569	4.71364	4.53577	4.19096	5.13383	4.01021	4.45638	4.54384	4.30747	4.59716	4.39111	4.5344
AC005306.3	7.83331	7.96621	8.43384	7.9001	7.72202	8.16287	7.8737	7.77965	8.41549	8.06192	8.13049	7.00149	6.12424	8.12996	8.60945	7.47106	7.65791	7.48923	7.56122	7.65752	8.3333	8.47602	8.55491	7.95985	8.21094	8.30535	8.22008	7.75714	8.3291	6.03681	7.42164	7.74511	7.12188	7.80703	6.24407	8.16762	8.17173	7.92503	7.90579	7.74025	8.12038	8.1672	6.9794	8.47024	8.13485	8.52586	6.97056	7.93989	7.41337
AC005498.3	3.89434	3.57662	3.97863	3.6564	3.9546	3.62307	3.7457	3.27302	3.68262	3.45578	3.54802	3.75931	3.92217	3.46925	3.38886	3.80464	3.90649	4.14088	3.77683	3.61483	3.47028	3.83938	3.66705	3.49315	3.64741	3.77476	3.74127	3.64689	3.81519	3.77291	3.86089	3.72674	3.88242	3.56391	4.63075	3.92808	4.04178	4.30842	3.23551	3.53967	3.80137	3.70204	3.64274	3.78521	3.76322	3.47932	3.95713	3.6549	3.68892
AC005523.2	9.60538	9.4013	9.34663	9.22848	9.19251	9.66446	9.25224	9.18246	9.09147	9.83235	9.81592	9.0822	10.3532	9.17578	8.84711	9.29291	9.44435	9.15215	9.31009	9.30961	9.68094	9.81616	9.54208	9.42709	9.37849	9.66644	9.93419	9.02759	9.02238	10.2279	9.84522	9.11592	10.1571	9.17487	10.0373	8.95249	9.16988	9.823	9.14853	9.79517	9.61886	9.29717	9.11919	9.17834	8.9756	9.40968	9.07261	9.45191	9.54989
AC005523.3	4.27402	3.66796	3.68184	3.90169	3.93998	3.86811	3.96858	4.29759	3.79519	3.91189	4.18746	4.15882	4.04431	3.93541	4.05778	3.68059	3.96858	3.99492	3.65703	4.07987	4.04637	4.07752	3.73447	4.01955	4.29229	4.19103	4.27039	3.83646	4.14376	4.16996	3.83501	3.68224	3.90846	4.23449	4.28903	4.06705	4.26733	4.24979	3.72759	4.06123	3.95193	4.18729	4.05714	3.88249	4.03447	3.87476	4.52404	4.10339	4.19801
AC005537.2	3.26766	2.90957	2.86096	3.17148	3.50214	3.26164	4.1918	3.12968	3.14255	4.33142	2.95549	4.1414	2.62819	2.83029	2.80743	2.95242	3.01906	3.37998	5.08624	2.79428	4.22925	2.73506	2.96656	2.77281	2.91787	2.73737	3.45288	3.49354	3.36378	2.7192	3.49945	5.20203	3.15842	3.28752	2.86336	3.01319	2.9047	2.66117	4.26328	3.47132	3.25054	3.13736	3.48811	3.028	5.03163	5.2626	3.23532	2.97063	3.16199
AC005592.3	3.20583	2.54129	2.31397	4.24999	3.28097	2.39754	3.41108	3.28821	3.87719	2.553	2.39743	3.09698	2.26848	3.19807	2.55056	3.68967	2.66245	3.85924	3.82663	3.24685	3.40844	3.15487	2.65189	3.14779	2.21176	2.86042	2.78127	2.95175	3.56726	2.38127	3.32828	4.43792	2.12254	3.19924	2.51414	3.20232	3.33994	2.46747	4.37398	2.58168	2.80215	2.40642	5.11451	3.51473	3.58217	3.57524	3.9584	3.9375	2.57319
AC005606.14	7.15817	7.09094	6.70005	5.71231	6.10461	7.04221	6.06358	6.50358	6.39925	6.63416	6.99774	6.10081	8.23572	6.98794	7.06249	7.12427	7.18032	7.17503	6.72953	6.90237	6.7403	6.86144	6.72435	7.23205	7.04716	6.95578	6.50312	7.08806	6.68341	7.64701	6.94451	5.7043	8.09649	6.90981	8.04143	6.31597	6.77234	7.35271	6.04569	6.33606	7.04539	6.65262	6.35457	6.77499	5.67177	6.87684	6.54553	7.0558	7.44513
AC005754.7 /// BC016751	2.31933	1.95469	2.19509	1.91435	2.04871	2.09832	2.09062	2.07212	2.10569	1.91124	2.08445	1.90574	2.20045	2.43956	2.331	1.90303	2.14287	2.17392	1.91312	2.00214	2.44452	1.98946	1.93614	2.18089	1.83795	2.0663	2.06432	2.19155	1.98451	1.84962	2.05235	1.94286	2.16085	2.12918	2.31011	2.44155	1.9476	2.50739	1.98364	2.04435	1.97407	2.00533	2.65912	2.55046	2.55511	2.22239	2.32315	2.34058	2.28387
AC005785.2	4.86572	4.9081	5.13673	4.52056	4.67022	4.67737	4.41837	4.27051	4.69195	4.52493	4.70268	4.35065	4.98346	5.05745	4.94945	4.39215	4.52384	4.55491	4.54753	4.82835	5.16652	4.6247	5.1148	4.37949	4.93366	4.73888	5.02044	4.94306	4.54479	4.31157	4.68144	4.76342	4.94787	4.53773	4.94397	4.47527	4.83109	4.57923	4.29885	4.57493	5.03685	4.78312	4.34193	4.9536	4.54372	4.51413	4.38633	4.15404	4.56053
AC005838.2	3.80957	4.1311	3.99296	3.9435	3.55059	4.04178	3.91552	4.19304	4.12942	3.78751	3.68764	3.71821	3.72564	3.81129	3.74644	3.78078	3.84	3.58243	3.60012	4.23917	3.49815	3.59157	3.47743	4.1037	4.15108	3.9571	3.67733	3.78509	3.89335	3.62584	3.86299	3.82476	3.95108	3.79535	3.66266	3.907	3.66834	3.60505	3.63991	3.82239	3.64226	3.55481	3.87908	3.38958	3.59727	3.56746	3.92759	3.21904	3.70887
AC006026.13	4.57406	4.39649	4.19811	4.50484	4.67004	3.71461	4.16915	4.95738	4.10937	4.03964	4.23802	3.57866	4.76122	3.94009	3.83365	3.56317	4.09658	3.92741	3.80321	4.03971	3.92917	3.56307	4.31113	3.79314	4.35276	4.36185	3.63179	3.55165	3.56726	3.95663	3.75795	3.88602	3.7731	3.79172	5.27367	4.22244	3.99358	4.26761	3.53947	3.8244	3.88976	3.65507	3.3979	3.86677	4.00665	3.85279	3.74464	3.84479	3.49313
AC006129.2	7.67237	8.16388	8.21947	6.59466	7.04258	7.23244	6.79929	6.62319	7.9639	8.42224	7.12798	7.40937	5.0531	6.87497	6.65183	7.37585	7.34661	6.8306	7.68239	6.9586	7.47984	6.68371	7.84631	6.50106	6.84248	7.04647	6.30993	5.7993	6.48906	4.39428	7.2108	7.82224	6.20824	7.29997	5.2338	6.23256	6.80258	6.30849	7.49795	8.24453	7.96101	6.28347	7.31801	7.1074	7.26951	6.08981	7.07264	7.65361	7.44265
AC006538.1	3.90926	3.00002	2.82295	3.15234	3.23001	2.95654	3.30646	3.52141	2.93099	2.84558	3.76305	3.4968	3.16051	3.4731	3.55601	2.72028	3.42131	2.88062	3.20692	3.06683	2.92699	3.16781	3.33412	3.0792	3.70198	3.28474	3.7322	3.05427	3.31368	3.48967	2.82247	3.27747	3.60695	3.43724	3.05407	2.58747	3.43251	2.93	3.08433	2.99516	2.76577	3.83363	2.84719	3.03361	3.29395	3.07863	2.76463	2.73883	2.96821
AC007228.11 /// BX647249	3.89269	3.31969	3.44585	3.11442	3.64156	3.52729	3.0637	3.06179	3.22878	3.44556	3.56358	3.48478	3.70471	2.94592	3.12854	3.34843	3.43015	3.88857	4.00554	3.0749	3.24462	2.93233	3.03183	3.04641	3.7487	3.52821	3.45869	3.07308	3.33397	3.54835	3.02566	3.50956	3.22561	3.57308	3.71872	3.62002	3.57615	3.67458	3.38951	3.39494	3.0227	3.02895	3.57669	3.22623	3.65019	3.35521	3.30692	3.5583	4.10177
AC007255.8 /// BC038570	3.14806	3.06533	3.28313	3.16235	3.79052	3.26008	3.03194	3.49327	3.34406	3.26607	3.49297	3.12048	3.51038	2.88488	3.4723	3.94677	2.97537	3.55763	3.22867	3.15149	3.3788	3.46903	3.35604	3.59245	3.21378	3.16851	3.53926	3.09179	3.22061	3.45006	3.52089	3.74309	3.23081	3.67105	3.39755	3.68426	3.39023	3.27333	3.38814	3.32798	3.21279	2.84383	3.46222	3.37156	3.7887	3.60958	3.36561	3.69943	3.25497
AC007292.3	5.21778	5.61687	5.38127	5.94354	6.02605	5.42038	5.79283	5.91344	5.97705	5.17831	5.1588	5.97662	5.38613	5.73553	5.64283	5.36329	5.51236	5.7111	5.70177	5.34479	5.97813	5.44367	5.44763	5.32754	5.66224	5.57459	5.9278	6.12606	5.81085	5.22799	5.4757	5.82615	5.37436	5.97667	5.48612	5.57709	6.00915	5.26184	5.82688	5.26242	5.66037	5.99389	5.61053	5.75867	5.49037	5.68468	6.46478	5.79676	5.61462
AC007349.5	2.82575	3.06729	2.77608	3.16117	2.89248	2.79451	4.97912	3.42212	2.67453	3.75645	3.31798	4.4329	2.85448	2.81076	2.44159	3.43934	3.41067	2.58308	3.96649	3.43248	3.66276	3.2482	2.48385	2.70726	2.82447	3.16111	2.57202	2.54899	3.18719	2.89248	3.12592	5.14989	2.87979	2.87037	2.64773	3.86363	2.89547	3.37937	4.51703	3.91002	2.9041	3.04362	4.67028	3.08541	4.15753	2.79532	3.56945	3.01536	3.77992
AC007362.3	4.29904	4.20057	4.11612	4.48054	4.55609	4.14868	4.30548	4.39057	4.67251	4.31283	4.26007	4.37784	4.09347	4.15822	4.44453	4.29729	4.25167	4.84234	4.52916	4.16113	4.53912	4.34346	4.19101	4.24654	4.52361	4.32533	4.2687	4.70211	4.43628	4.43628	4.15083	4.64275	4.23391	4.56719	4.63896	4.36262	4.82765	4.37971	4.31445	4.19065	4.06352	4.63975	4.76931	4.46715	4.14275	4.38859	4.94743	4.07521	4.482
AC007364.1 /// FLJ32955	5.01206	4.52436	3.60869	5.67695	7.6967	3.73185	5.79708	4.47562	6.96923	6.76988	3.41542	6.02671	3.79079	2.97889	4.03228	5.81991	3.43477	6.80659	7.06909	3.63978	4.93545	4.17213	3.73522	3.9954	3.24175	2.73802	4.16432	3.65989	4.04227	3.44282	5.36597	6.00489	3.62853	4.62482	3.5703	5.24334	3.71309	5.17002	6.55326	5.16475	4.37998	3.92399	5.63917	4.29115	6.90386	5.91528	5.66771	4.37656	3.56933
AC007365.3	6.01244	6.04702	6.33356	6.42563	6.12543	6.09666	6.22152	6.21622	6.76639	6.06214	5.99817	6.07006	6.19917	6.36685	6.04563	6.3286	6.13269	6.21119	6.62997	6.23559	5.97009	6.20362	5.98193	6.01036	6.3666	6.59193	6.55536	6.58899	6.38933	6.19775	6.18567	6.2227	5.94168	6.80751	5.93832	6.28906	6.42002	6.40604	6.20362	5.67447	6.22233	5.96202	6.66001	6.32099	6.13851	6.0635	6.71622	6.28176	6.04195
AC007389.3	2.90713	2.98675	3.32116	3.95902	3.25239	2.78699	3.58205	3.9077	3.21401	2.85911	3.05875	3.78034	2.43022	3.02691	3.19902	3.301	2.73499	3.66772	3.19218	2.83336	3.09715	2.81752	3.00056	2.7207	3.00879	3.02009	3.0746	2.9763	3.03166	2.87469	3.14354	3.48326	2.53412	3.70735	3.14976	3.7073	3.12277	3.02196	4.16107	3.13773	2.96661	3.17441	4.27017	3.13572	2.98472	2.67416	3.63803	3.16684	2.94983
AC007401.2	5.56446	6.0793	5.75871	5.62744	5.39871	6.22524	6.35626	6.51741	6.57562	5.80025	5.74131	4.59489	6.42157	6.15846	5.63893	6.07245	6.59512	6.31379	6.07394	6.19907	6.0753	6.00476	6.22622	6.42828	5.66275	5.95687	6.21165	5.99096	6.03189	5.53184	6.22194	5.39534	6.27718	6.16335	5.11813	5.30562	5.68391	4.94955	5.85658	5.70765	5.81642	4.5166	4.88888	6.90285	6.66574	5.76751	4.23685	5.75273	5.52162
AC007557.2 /// BC031974	2.85735	2.57905	3.0913	2.91138	3.6448	2.67069	3.54312	2.9154	2.89977	3.05321	2.85735	3.45302	2.81525	2.7401	2.5492	3.17179	2.98117	3.58772	3.14083	2.44968	2.69338	3.13753	3.00483	2.78639	2.96061	2.75436	2.87916	2.79933	3.26535	2.72601	2.84422	3.44988	2.78395	3.07153	2.81298	2.68633	3.05986	3.21368	3.71561	3.30263	2.50629	2.72335	3.09202	2.72609	3.58987	3.67755	2.62354	2.53927	2.78551
AC007680.2	3.54885	3.81567	3.506	4.59047	4.99741	3.51619	4.69193	4.1746	5.07391	4.44976	3.26794	5.14307	4.12076	3.78533	3.33085	4.27865	3.63872	4.84083	4.68927	3.47116	3.89381	3.6459	3.6772	3.48524	3.32687	3.41719	4.0736	3.69342	3.75323	3.41671	4.14448	5.07596	3.42321	3.92881	3.49152	4.24185	3.48261	3.97674	5.06055	4.18709	3.31717	3.50761	4.22528	3.91953	4.82544	4.69034	3.98801	3.32812	3.51701
AC007787.2	4.69926	4.94763	5.04946	4.94317	4.96038	5.13399	4.86097	5.08867	4.58799	4.82517	5.43503	5.24924	5.30974	5.4341	5.18084	5.15725	4.95472	4.76097	5.07651	5.17002	5.32809	4.85461	4.994	4.78905	5.34243	5.07815	5.13419	5.47018	5.42309	5.36977	5.27021	5.2116	5.42725	5.13877	5.26681	5.07083	5.54438	5.66027	5.18574	5.03214	5.26894	5.46278	4.82343	5.55346	4.82848	4.95128	5.02555	5.28965	5.43946
AC007967.3 /// RBMY2TP /// RBMY2TP	2.39725	2.57935	2.51383	2.61735	3.06199	2.44649	2.6005	2.98324	2.69724	2.92932	2.11706	2.91165	2.60108	2.43717	2.80244	2.82414	2.39822	2.86915	2.93365	2.61748	2.89127	2.87904	2.24101	2.556	2.57824	2.42406	2.8731	2.44523	2.79638	2.50739	2.46371	2.36421	2.22988	3.45748	2.44738	3.04338	2.51381	2.82154	2.6188	2.7076	2.54695	2.50998	3.24487	2.68512	2.78814	3.01897	2.98725	2.64747	2.56935
AC008088.4	5.41767	5.12678	4.89836	4.71576	4.39193	5.05742	4.8721	4.79043	4.70112	4.94431	5.33676	4.35787	4.34093	4.42946	4.65361	4.41298	5.36522	4.72583	4.40654	4.82025	5.2964	5.35345	4.73862	4.75983	4.80141	4.57849	5.13995	4.90907	4.64495	4.23095	5.06545	5.00638	4.42897	5.12103	4.61136	5.20213	4.61938	4.35402	4.32779	5.07869	5.16201	4.90054	4.87639	4.62792	4.21092	4.55305	4.62459	4.80292	4.61966
AC008746.12	5.43592	5.90701	5.77357	5.32037	5.05926	5.57695	3.7201	3.93242	5.94727	5.2939	5.77045	3.62448	4.40555	5.8283	6.27703	5.48741	5.43736	4.59202	4.98829	5.63627	5.67857	5.99144	6.23976	5.32592	5.49676	4.96455	5.51183	5.32391	4.94611	4.58706	5.18095	4.53119	5.32771	5.56763	4.31	4.92996	4.55777	4.77851	4.06511	5.55752	5.82635	5.54178	4.4879	5.00571	5.61667	4.26275	4.03252	5.66766	4.85183
AC008753.4	5.94365	5.98415	6.09099	6.38572	6.03495	6.31675	6.26336	5.8373	6.17799	5.55943	6.44333	5.74099	5.95844	6.43438	6.20863	5.61429	6.12638	6.5889	5.60183	5.86298	6.09275	6.23395	6.10817	6.56709	6.55936	6.2422	6.84297	6.4633	6.62553	5.99082	5.5955	5.94311	5.72642	5.82023	6.13184	6.07014	6.44517	6.33539	6.33651	5.85285	6.37619	6.24633	5.65312	5.65723	6.57788	6.46216	5.77483	6.02292	6.06906
AC009120.6	9.88377	9.89523	9.84709	9.4802	9.4369	9.69841	9.45282	9.54148	9.32267	9.69078	9.86774	9.54601	10.3784	9.78007	9.65578	9.67713	9.89798	9.67791	9.6488	9.81983	9.63711	9.63421	9.60108	9.79067	9.75329	9.72682	9.61876	9.46688	9.40721	10.3037	9.77121	9.43984	10.1803	9.66516	10.2182	9.55267	9.62916	9.78403	9.58859	9.76851	10.0321	9.48254	9.88705	9.58642	9.25267	9.71869	9.49088	9.81278	9.63665
AC009133.15	4.32838	4.11949	4.13686	3.54534	3.89596	4.24087	3.96304	4.00827	3.2951	3.70608	4.3981	3.17516	4.44264	4.44713	4.4628	3.96073	4.24051	3.59692	3.23266	4.05652	3.61126	3.66365	4.72367	3.89827	4.53962	4.54812	4.34759	4.15284	3.68051	4.55919	3.91856	3.43686	3.97956	4.03284	4.55323	4.2853	4.25146	3.9213	3.56249	3.52745	4.12641	3.99815	3.86169	3.74843	3.81824	2.9046	3.64927	4.11146	4.74973
AC009237.8 /// AK055967	4.41391	4.123	3.77143	4.27698	4.83269	4.341	6.1211	5.65007	4.78396	4.47714	4.07499	6.02061	3.55108	4.15958	4.54974	4.69566	4.07511	4.31969	5.73456	4.6235	4.42625	3.66032	5.06595	4.37871	4.64669	3.95293	4.02659	4.19449	4.99234	4.09368	4.67033	6.55468	3.99127	4.6855	3.39375	5.16329	5.03619	4.00205	6.59202	5.51467	4.0374	4.35362	5.93083	4.92765	5.56479	4.95128	5.34523	5.47497	5.11924
AC009502.4	3.27426	3.46372	3.63195	4.24065	4.68009	3.28646	3.50593	5.0135	4.01827	3.66616	4.01193	3.67754	3.40525	3.23833	3.66968	4.06505	3.52845	4.29604	3.57542	3.65909	3.37705	3.97751	3.57217	3.46816	3.28101	3.69757	3.75675	4.17059	4.79094	3.77108	3.47087	4.0579	3.31731	4.03241	3.6818	3.96561	3.62712	3.75152	3.56298	3.62509	3.50923	3.67789	5.35449	3.91953	4.12396	3.84725	4.41773	4.91282	3.29346
AC009947.3 /// RBMY2AP /// RBMY2AP /// RBMY2BP /// RBMY2BP /// RBMY2DP /// RBMY2DP	2.96282	2.70895	2.91997	2.71315	3.00556	3.18346	3.38228	3.02512	3.01721	2.90221	2.67944	3.01348	2.98989	3.03554	2.81591	3.05798	3.1373	3.47667	3.17532	3.18105	2.93909	3.03722	2.82329	3.10614	2.97717	2.90556	3.39457	3.26547	3.0102	3.06091	2.80244	3.21015	2.89663	3.24866	2.39971	3.0722	3.76074	3.82308	2.81134	4.16727	3.13177	3.34489	2.97999	2.7329	2.75258	4.02696	3.23536	2.79874	2.72677
AC010095.5 /// RP13-1039J1.3	3.71293	3.81545	3.44952	4.08774	4.49038	3.77446	4.36328	3.96321	3.96066	4.09502	3.76305	4.13931	3.75647	4.13166	4.07568	3.90471	4.03592	3.89731	4.16918	3.40542	3.92948	3.81819	3.87032	3.87376	3.58543	4.17807	3.84749	4.18052	4.05745	3.95582	4.18811	4.68203	3.67408	4.0127	4.43221	4.0626	4.06124	4.10291	4.59188	3.59196	3.88856	3.84416	4.79008	3.88881	4.14275	4.22818	4.08638	3.80128	3.80662
AC010145.3 /// MYCNUN	3.99942	3.7011	3.53734	3.76239	3.77323	3.27375	4.3721	3.89993	3.90256	3.55577	3.29078	4.56154	3.6386	3.74781	3.68954	3.93469	3.51405	4.04265	4.39511	3.80767	3.7011	3.81729	3.54604	3.60791	3.52275	3.82759	3.86024	3.85518	3.78278	3.45995	3.57854	4.60344	3.01603	4.02966	3.42184	4.23512	4.34286	3.51512	4.09704	4.27704	3.41368	3.97426	4.03949	3.66076	3.60635	3.66608	3.92212	3.59432	3.42249
AC010145.4	2.58008	2.54541	2.72904	2.40366	2.4965	2.36705	2.85114	3.61976	2.93249	2.63523	2.33676	3.09471	2.38691	2.57542	2.63291	3.0124	2.35962	2.29694	3.26934	3.106	2.42774	2.25289	2.07502	2.62706	2.67964	2.64075	2.58906	2.31908	2.99399	2.16663	2.32836	3.28285	2.87842	2.61052	2.79343	3.17906	2.85267	2.98913	2.79764	2.51739	2.24357	2.77697	3.37951	2.34685	2.40918	2.85215	2.98725	2.15751	2.28387
AC010524.4	2.33031	2.37531	2.58	2.61616	2.36096	2.5795	2.87207	2.92653	2.74043	2.56288	2.46706	2.69157	2.18723	2.70458	2.40263	2.33449	2.29668	3.075	2.79707	2.38325	2.2077	2.55938	2.23908	2.50651	2.55866	2.73156	2.65435	2.82979	2.74871	2.40013	2.54641	2.50793	2.35947	2.67404	2.64319	2.98717	2.64902	2.58582	2.41209	2.62784	2.23019	2.50963	3.40981	2.55461	2.5639	2.87305	3.03012	2.5743	2.4832
AC010980.2 /// LOC440934 /// LOC440934	3.41279	3.40408	3.42262	4.13917	3.59617	3.78064	3.42092	3.2849	3.33745	3.29633	3.95264	3.61017	3.76694	4.10959	3.55325	3.13487	4.5986	3.99653	3.30711	3.47555	4.13188	4.20869	4.01895	3.76262	4.22665	4.09306	4.14349	4.06688	3.43427	3.76603	3.72859	3.46527	3.246	3.19731	3.93212	3.98611	3.92525	3.96762	3.67647	3.66383	3.9011	4.03583	3.66039	3.79566	3.75759	3.32753	3.17425	3.09689	3.59338
AC011997.1 /// BC021693	2.53111	2.27154	1.99862	3.43048	3.33327	3.42981	2.53561	2.23733	2.71965	3.17401	2.3812	3.21855	2.33127	2.34977	2.05553	3.60912	2.70724	3.78619	3.61524	2.59887	2.99681	3.06056	2.90972	2.51952	1.8165	2.00531	2.29858	1.91214	2.304	2.32789	2.60641	2.49515	4.81294	2.32134	2.6696	2.21403	2.86587	2.82397	2.83326	2.63751	2.42463	2.45837	2.01916	2.00699	2.9864	2.6601	2.19118	3.80038	2.34756
AC012065.7	5.30972	5.69887	6.00644	5.56013	5.39065	5.58686	5.1129	5.63411	6.02497	5.68216	5.2656	5.40088	5.55812	5.24712	5.37843	6.08128	5.60352	5.22831	4.69926	5.18503	5.0981	5.26944	5.74085	5.32642	5.94073	5.83404	5.45436	5.5898	5.42843	5.61789	5.32692	5.26944	5.40374	5.88551	5.80665	5.4594	5.35542	5.36877	4.5968	4.645	5.79884	5.90475	5.03086	5.624	4.77525	4.76928	5.38469	5.92413	5.81811
AC012360.6	4.21018	4.24467	4.47413	4.07658	4.28442	4.25566	4.15876	4.14392	4.38614	3.91251	4.67568	3.89308	4.4208	4.16114	4.07378	3.65998	3.99289	4.22946	4.29361	3.71666	4.41009	3.94843	4.18758	4.19302	4.07299	3.90292	4.35154	4.67838	4.08225	4.21323	4.10526	4.14206	3.87265	4.06375	4.30785	4.18204	4.71484	4.33769	3.73135	4.31655	4.04201	4.51622	4.02936	3.86908	4.1794	3.7283	3.99282	4.20646	4.26152
AC012499.1	1.93391	2.46477	2.05143	2.07927	2.12104	2.21874	2.2836	2.19492	2.49857	2.01079	2.17114	2.45691	2.10894	1.9413	2.18918	2.1379	2.04534	2.14342	2.16054	2.03319	2.66616	2.00457	2.14342	2.51468	1.86901	2.10714	2.13528	2.52198	1.76934	2.00595	2.12325	2.49436	2.76631	2.06641	2.70648	2.2987	2.0835	2.04462	2.43136	2.42962	1.82149	2.01289	1.9769	2.00026	2.57472	1.76373	2.52946	2.0029	1.936
AC012531.25	2.21643	2.32204	2.15948	2.07515	2.38765	1.98209	2.2833	2.13803	2.04005	2.0594	2.10334	2.29012	2.15943	1.98543	2.11244	2.36789	2.25419	2.54628	2.99818	2.01637	2.36203	2.08978	2.07502	2.16605	2.05135	2.21173	2.43835	2.25356	1.99504	2.17818	2.01637	2.07234	2.12878	2.21716	2.05802	2.26452	1.98282	2.27163	2.28219	2.2463	2.19726	2.18173	1.91757	2.12656	2.21716	2.36998	2.61223	2.45454	2.25127
AC013463.2	4.32506	4.75879	5.04946	5.30681	5.58898	4.94221	6.09979	4.92756	5.85331	6.53874	4.38135	5.85746	4.7022	5.24196	5.23416	5.47731	5.26285	4.7866	6.84845	4.38393	5.87203	5.21867	4.7717	4.91031	4.9704	5.14104	4.8999	5.23621	5.10085	5.31693	5.47808	6.39011	4.58663	4.85358	4.72287	5.08742	5.20608	5.24752	6.00259	5.75554	5.06747	4.74876	5.53788	4.72389	6.86024	6.16437	5.01087	5.16255	4.88458
AC013733.4	2.14411	2.07154	2.04238	2.21149	2.23795	2.10779	2.2116	2.14981	2.12324	2.44481	2.11588	2.27101	2.00036	2.23972	1.95861	2.11826	2.02042	2.39898	2.22871	2.01506	1.94268	2.11433	2.19786	2.60696	2.19085	1.99035	2.25933	2.01347	2.18249	2.12064	2.17993	2.41097	2.08392	1.94266	2.21954	2.04891	2.24634	2.48088	2.22779	2.14822	1.95138	2.28358	2.28954	2.14328	1.95927	2.40362	1.92976	2.2535	1.99168
AC016831.7	3.15706	2.61491	2.80915	2.82838	2.38026	3.28815	2.858	2.64323	2.88104	2.44163	2.34822	2.81625	2.63507	3.08216	3.41448	3.28813	3.12345	3.08669	2.83662	2.43202	3.15503	2.46465	3.03352	3.54435	3.66867	2.95106	3.56175	3.41843	3.46004	3.28127	2.76019	2.86215	2.6956	2.76503	3.32245	3.1263	2.81916	4.01205	2.49204	2.80499	3.0098	2.64896	2.64318	2.91617	2.54167	2.85215	2.82422	3.2838	3.11542
AC016999.2	4.33614	4.56638	4.30913	4.58904	3.78401	4.64316	3.95231	4.51859	4.58802	4.29888	4.52072	4.38923	4.26589	4.69263	4.2951	4.02023	4.59073	4.17967	4.87939	4.56759	4.38659	4.62816	4.45627	4.85979	4.48576	4.52589	4.86804	4.27561	4.53913	5.67606	4.42602	3.87488	5.04645	4.34206	5.18104	4.7802	4.7044	4.77861	4.39034	4.10623	4.56924	4.58789	4.54265	4.57312	4.01166	4.52118	4.63071	4.51713	4.48896
AC017002.2	7.26207	7.26976	6.80556	7.02425	7.38404	7.0349	7.61916	6.74975	6.86581	6.90851	6.97838	6.74673	6.59924	7.8421	7.25439	7.14405	7.35768	6.09296	6.54065	7.18666	7.59611	7.09758	7.51317	7.58047	7.02233	7.12146	6.46535	7.1856	7.84302	6.50187	7.37251	6.10088	7.85216	7.45945	6.25059	7.33535	7.64365	6.11717	6.87422	6.8831	7.10728	8.0746	6.17666	7.44169	7.61718	6.59242	6.08495	7.50587	6.75732
AC017104.6	6.68969	6.88215	6.57201	6.72236	6.77526	6.95384	6.55227	6.71087	6.96708	7.09499	6.33457	6.90666	6.69175	6.86592	6.74671	6.96779	6.31054	6.85017	6.60361	6.98957	6.79134	6.64651	7.06605	6.53702	6.4702	6.70755	6.8389	6.85428	6.48753	6.49441	6.73335	6.81061	6.49042	6.60025	6.64581	7.17554	6.90704	6.39991	6.7397	6.79287	6.46419	6.66295	7.05591	6.8086	7.07137	6.50655	6.99465	6.51914	6.88112
AC018462.2 /// BC071802	3.45221	3.58848	3.93291	4.82863	5.13239	3.63846	5.19547	4.75852	4.57911	4.51768	3.21617	6.02994	3.33294	3.76065	4.19905	4.5168	3.78837	3.75323	6.20938	4.12546	5.32272	3.83893	3.71308	3.62065	3.8873	3.46878	3.80063	4.24177	4.85045	3.29742	4.11112	6.29613	3.60529	5.58788	3.08665	5.18249	4.69211	3.65924	5.71554	5.43592	3.63545	3.94387	5.98601	4.58316	5.8351	5.09211	6.12377	4.63697	4.08331
AC018755.16	4.93562	5.03009	5.12827	4.63828	4.43957	4.94841	4.43925	4.36574	4.78144	4.82927	4.96351	4.30572	5.01156	4.99752	4.91885	5.09829	4.55077	5.16554	4.46755	4.92856	5.18096	4.98398	5.08078	4.89594	4.84921	5.08621	4.89995	5.1637	4.7775	5.19019	5.00024	4.64367	4.92997	4.99966	5.32869	4.98749	5.38519	5.1191	4.92312	4.97287	5.23491	4.83658	4.63482	4.97453	4.22302	4.5678	5.20184	5.09453	4.86345
AC018755.17	3.82106	4.36859	3.13973	3.17731	3.54155	3.86723	3.95765	3.24585	3.40121	3.15413	3.84363	3.19683	3.50161	3.57708	3.17676	3.04642	3.30827	2.86254	3.39009	3.59014	3.72292	3.60375	4.53306	3.56038	3.68992	3.07496	3.56116	3.72991	3.41383	3.31892	3.43112	3.96599	3.44738	3.4835	3.18963	3.53439	3.67076	3.55204	3.9196	3.10012	3.6326	3.31723	3.26932	3.46969	3.55777	3.80794	3.42802	3.00714	3.59014
AC018766.6	4.49148	4.76162	4.90392	4.18799	4.24197	4.75254	4.30526	3.94382	4.82496	4.27684	4.93878	3.764	4.06904	4.81332	4.28185	4.19989	4.22227	4.21789	3.8849	4.3559	3.95207	4.62466	4.34026	4.78701	4.32564	4.88496	4.92836	4.39242	4.44909	4.2319	4.18867	4.11072	3.79306	3.81729	4.46643	4.20348	4.64055	4.77851	3.67313	4.59849	5.01704	4.57768	4.30705	3.9565	4.34352	3.75958	4.10995	3.22303	4.59478
AC018816.3	5.11391	5.50438	5.59361	4.66415	4.97011	5.0696	3.40802	4.21548	4.06515	5.02793	5.52417	4.1414	5.71227	4.54129	4.57103	4.48734	4.93766	4.6809	5.04632	4.5604	4.74864	4.74938	5.05604	4.9029	4.83454	5.00185	4.64995	4.23802	5.01099	4.99183	4.77198	4.29904	4.86913	4.47623	5.77807	4.78539	5.21439	4.29177	4.6199	4.82091	5.03078	5.04183	5.09922	5.33457	4.21006	3.91326	3.66062	4.60079	5.26349
AC024560.2	3.03844	3.0396	3.63383	3.45324	3.07555	3.07555	2.87657	3.3773	3.03113	3.29452	3.84492	3.15463	2.86583	3.24899	3.35879	2.95889	3.81836	3.17397	2.76917	3.40542	2.91291	3.21104	3.05797	3.12287	3.15297	3.6479	2.81564	3.2726	3.12827	3.12767	3.01964	3.07858	3.73239	3.21947	3.76858	3.07854	3.08069	3.50695	3.04343	2.86741	3.50695	3.21224	3.16297	3.37929	3.02751	3.30338	3.47976	3.31737	4.05269
AC025442.3	4.94332	5.03874	5.26015	5.02609	4.58495	4.98751	4.83986	4.56258	4.91984	4.85902	5.12187	4.60278	5.24137	5.04723	4.91978	4.67009	5.0888	4.54196	4.60709	4.68726	5.06271	4.99212	4.99292	5.17351	5.19369	5.36397	5.27642	4.90032	4.74188	5.04962	5.08103	4.52371	5.20608	4.81895	5.38089	4.55081	4.98677	5.64503	4.46181	4.72544	5.08185	5.30283	4.2046	4.90651	4.83554	4.59867	4.40092	4.66656	5.08638
AC064852.4	5.84344	5.56529	4.21971	5.89587	7.06059	4.29091	6.63032	5.97282	7.52517	6.51729	3.98757	6.16471	3.70297	3.68123	4.89768	6.23721	4.13548	6.72251	7.20958	4.85098	5.23948	5.70956	4.85898	4.99162	4.68151	4.21207	5.34335	4.59849	5.17725	4.01011	5.75994	7.05541	4.07987	5.24393	4.03103	5.82819	5.08327	4.88932	6.27111	5.42058	4.57871	3.9294	6.34562	5.09745	7.04865	6.52228	6.66192	4.80627	4.68839
AC067956.1	1.94602	1.91931	1.96339	2.30225	2.59124	2.06705	2.18617	2.35838	2.5191	1.87587	2.18617	2.13055	2.0877	1.98828	1.92943	2.34929	2.15449	2.35741	2.25194	2.11785	2.17998	2.32461	2.26946	2.18901	2.0178	2.1281	2.17803	2.04271	1.89791	1.95858	2.62153	2.5184	1.97404	2.11057	2.05906	1.82881	2.09782	2.19182	2.3014	2.28119	2.07097	2.11121	2.22189	2.50164	2.12003	2.6172	2.69821	2.31232	1.87589
AC068039.4	3.85508	3.79294	4.19805	5.03426	5.4525	3.71521	4.64964	4.85107	4.79551	4.77472	3.91034	4.49754	4.00456	4.13305	3.95632	4.61862	4.12534	4.80458	5.58775	4.39836	4.24931	4.21752	3.70013	3.96422	4.63098	3.93249	3.79517	4.37104	4.71782	3.19101	4.41431	5.35316	3.57285	4.89598	3.78817	4.89477	4.69045	3.8119	4.56316	4.06458	3.93239	3.96711	4.95263	4.3751	5.29416	4.39074	5.35411	5.16182	4.24246
AC068138.1	3.91195	3.80194	3.66721	3.84662	3.91089	3.8795	4.21971	3.70735	3.74002	3.99392	3.88792	3.93355	3.72667	3.75232	3.89145	3.89614	3.51935	3.34021	4.08195	3.43167	3.68633	3.57864	3.87167	3.70735	3.68819	3.82302	4.19053	3.67186	3.50512	4.00162	3.69463	4.04071	3.73808	3.58847	3.29881	3.58799	3.70735	3.48037	3.48659	3.66439	3.22209	4.00914	3.52886	3.72882	3.97255	3.57225	3.49383	4.07128	3.65273
AC068831.3	4.59297	4.1468	4.6673	4.46363	4.16746	4.28056	4.43909	4.28308	3.61109	3.86085	4.43307	4.22144	4.32036	4.60124	4.45338	4.54435	4.38485	4.5666	4.37974	3.96344	4.33385	4.11863	4.30526	4.37949	4.07081	4.25457	4.74432	4.58648	4.14848	4.47067	4.1856	4.28052	4.35909	4.60475	4.82035	4.47248	4.55792	4.49175	4.32613	4.21188	4.21146	4.84477	4.44506	4.35935	4.18817	4.25789	4.11886	4.34392	4.30526
AC069277.2 /// AF279782	2.18151	2.39876	2.38059	2.26995	2.44149	2.47499	2.91275	3.31126	2.23641	2.76998	2.3493	2.32639	2.49838	2.36139	2.46584	2.20362	2.3417	2.39318	2.45734	2.46101	2.26356	2.92674	2.16615	2.40217	2.38551	2.70872	2.6949	2.5463	2.38949	2.67795	2.43752	2.84093	3.82262	2.50683	3.36538	2.25792	2.74171	2.56493	2.55727	2.65633	2.64435	2.4266	2.71338	2.49589	2.43752	2.55732	2.56847	2.28529	3.72977
AC073283.7	6.22533	6.22105	6.31709	6.11828	6.09499	6.135	5.69223	5.64631	6.62518	5.62151	5.94606	6.26516	7.31135	6.62384	6.18138	6.54111	5.75228	5.55422	6.33785	6.24327	6.11702	6.15157	5.99194	6.65883	5.93516	6.1236	5.54749	6.28459	5.70383	6.3987	6.35042	6.12643	7.50258	5.81615	6.49527	6.23417	6.35864	5.44539	5.59194	6.39505	6.32276	6.02916	5.27034	6.54157	5.39623	5.67285	5.50331	5.62568	5.75957
AC073321.4	5.69675	5.66089	5.72613	6.40906	5.36525	6.01566	5.80385	5.83168	5.653	5.64375	5.97539	5.49048	6.27024	6.06317	5.91884	5.58627	5.7526	5.96811	5.48472	5.61756	6.27894	5.97574	5.55824	5.96435	6.01165	6.13446	6.07297	5.84849	5.86773	6.13225	5.55579	5.82956	6.18317	5.69804	6.09439	5.90835	5.8575	6.45365	5.53865	6.08665	5.65382	6.00006	5.36278	5.75495	5.87573	5.93999	5.62631	5.61074	6.12198
AC074212.6	4.23158	4.1569	4.22504	4.38959	4.14429	4.20859	4.32505	4.17115	4.42113	4.19971	4.28789	4.35715	4.47885	4.49423	4.5038	3.91593	4.45589	4.35441	4.54678	4.37312	4.58183	4.46446	4.23317	4.35872	4.49078	4.71948	4.91378	4.471	4.25275	4.48618	4.40018	4.45568	4.49885	4.20231	4.50643	4.57275	4.87406	4.77279	4.62929	4.07896	4.2358	4.80879	4.43995	4.51188	4.12688	4.3624	4.64093	4.34492	4.33612
AC078842.4 /// AK094915	2.69234	2.24473	2.27554	2.20506	2.09925	2.20631	2.13059	2.07912	2.10537	2.23488	2.18444	2.64855	2.18834	2.20727	2.35605	2.55421	2.21255	2.14676	2.57042	1.83938	2.52087	2.12518	2.29117	2.00452	2.18049	2.27267	2.39507	2.29142	1.96251	2.12726	2.35885	2.52573	1.89121	1.78164	2.21686	2.45359	1.98175	2.51659	2.28753	2.349	2.19791	2.20506	2.11705	2.19304	2.7556	2.46716	2.03474	2.23352	2.04758
AC078883.3 /// AC078883.4	5.0639	5.08374	4.91502	4.63573	4.39368	4.47314	4.50365	4.54346	4.58802	4.55268	4.91554	4.59181	4.80486	4.6268	4.50107	4.50619	4.57265	5.08753	5.209	4.89732	4.68358	4.72397	4.86535	4.85556	4.21018	4.63651	4.67501	4.42091	4.64613	5.41169	4.96733	4.39995	4.88325	4.4748	5.44841	4.58704	4.29266	4.95073	4.5025	4.4793	4.79426	4.91504	4.63677	4.95203	4.10851	4.86611	4.63226	4.92681	5.18122
AC079305.10	3.91846	3.67956	3.64345	3.15189	3.01082	4.01298	2.94695	3.77184	3.00288	3.56394	3.3381	3.97112	4.68925	4.32581	4.09639	3.11075	3.78996	2.59535	2.97978	3.77178	3.99072	3.57695	3.82281	4.34337	3.26086	3.17167	4.8075	4.46123	4.57234	4.76629	3.27499	3.11412	2.92437	3.6425	3.59821	3.18851	4.02168	4.37676	2.73371	3.07919	3.77184	4.21369	2.99708	3.19496	3.33432	3.13538	4.00287	4.05921	4.89907
AC079741.2	3.54942	2.78399	3.21806	2.4609	2.16775	2.80067	2.02981	2.12493	2.59595	2.38113	2.66351	2.49164	2.54559	3.67986	3.71581	2.35226	2.31376	2.76438	2.45259	2.19995	2.3433	2.54303	2.48552	2.70726	2.94074	3.37959	2.50815	2.68014	3.52042	2.64035	2.34658	2.34821	2.03258	2.3515	2.69841	2.35576	2.77482	2.45429	2.49733	2.38485	3.21265	3.57716	2.73906	2.87811	3.30188	2.92557	2.21097	2.7258	2.43293
AC079767.4	6.59737	6.63666	6.66904	4.30268	4.86473	4.86893	5.54111	6.34908	5.23258	6.58352	5.96944	4.78166	6.53086	5.53662	4.73116	5.73834	5.19718	4.45749	3.4164	5.72428	6.0478	4.97244	7.81682	5.71921	6.59888	5.95081	4.93545	4.73184	4.40119	6.66455	5.14205	6.31487	6.18051	6.29325	6.48962	5.21225	4.39524	5.76467	3.77668	5.96029	5.80447	3.49063	4.58806	5.35505	5.14565	2.77265	5.44497	6.12569	6.75089
AC079807.4	2.28256	3.2254	2.90122	3.3788	3.93484	3.55308	3.16196	2.90536	2.17942	2.61736	2.96585	3.0133	2.72544	3.82602	3.75806	2.35593	4.59262	2.30671	2.84424	2.73064	2.34399	3.30092	2.69152	3.09617	3.09389	3.25599	3.21253	2.5941	2.46675	4.28683	2.71317	2.6806	2.65429	2.70586	2.85622	2.82927	3.21263	3.24734	3.23253	3.48192	3.813	2.37249	2.25728	2.7508	2.52485	2.55539	3.92212	2.48986	3.4187
AC083843.1	3.964	4.59095	4.2434	3.56601	3.49621	4.5366	3.93082	3.65171	4.30966	4.3052	4.41212	3.55312	4.02185	4.38731	4.61107	3.94769	4.28837	3.9127	4.34297	3.88306	4.4799	4.45341	4.32867	4.09457	4.0537	3.97764	4.05861	4.16242	3.87206	3.54024	4.37188	3.84367	3.98657	3.7657	3.57884	4.22774	4.15312	3.78443	3.90145	4.14892	4.87619	3.87855	3.75287	4.09906	3.4015	4.2207	3.75549	3.76706	3.77416
AC083949.1	8.1133	8.12274	8.3835	7.93692	7.68721	7.84917	7.41656	7.49159	7.56144	8.01591	7.84004	7.39961	7.40206	8.27345	8.02323	7.94985	7.82119	7.24188	7.1551	7.79232	7.69377	8.09317	7.97399	7.9368	7.67294	7.88634	7.97354	7.75393	7.64549	7.53184	7.9939	7.17377	7.71537	7.36191	7.88157	7.4467	7.84022	8.23375	7.30779	7.62561	7.85286	7.60127	7.30297	7.63462	7.08133	8.28189	7.51338	8.2116	7.48122
AC084219.3	4.27066	4.51993	4.66893	3.83721	3.3776	4.38181	3.47943	3.41502	4.32709	3.67658	4.48057	3.54944	3.86113	3.95297	3.95438	3.28867	3.98823	3.69012	3.43761	4.1499	4.19729	4.21668	4.2205	4.4138	4.15108	4.20173	4.68272	3.82299	3.86533	3.82625	3.74668	3.09805	4.31097	3.52668	3.85533	3.22739	4.04178	4.43368	3.79414	4.41838	4.48151	4.17087	3.33132	4.07277	3.80838	3.86029	3.62938	3.80038	4.17302
AC087501.1	2.81886	3.07973	3.38538	3.0354	3.28285	3.35512	3.41204	3.13447	3.39344	3.31023	3.09112	2.91146	3.34121	3.09071	3.23354	3.65991	2.89678	3.559	3.50709	3.22342	2.93644	3.00862	3.84624	3.06428	3.26693	3.10673	3.28285	3.68516	3.2967	3.03329	2.9023	2.91362	3.66773	3.19949	3.49564	3.19049	3.291	3.02245	2.9344	3.21811	2.76259	3.19123	3.55103	3.05008	3.38173	2.76706	3.41213	3.48327	3.11279
AC090627.1	6.2438	6.85751	6.87538	5.76458	6.18668	6.28923	6.24024	6.24971	6.37794	6.81527	5.35064	6.40964	7.50511	6.29861	5.71819	7.98722	6.08787	6.29556	6.87822	6.93702	6.52243	5.82889	6.72217	5.29242	5.8482	5.63096	5.1393	4.56638	6.30782	6.3804	7.65323	7.02768	6.80712	6.0993	6.60093	6.50844	5.56999	4.85941	6.45981	7.03755	6.93075	5.52523	7.31571	5.75398	6.64108	6.70882	6.2466	7.48743	5.81795
AC091133.1	6.507	6.56706	6.37794	6.37003	6.36559	5.87046	6.31434	6.39418	5.6252	6.49717	6.54766	6.21304	6.96753	6.17193	6.28366	6.3157	6.69153	6.52399	6.41426	6.50421	6.80619	6.58967	6.60791	6.59928	6.48843	6.37763	6.49463	6.29328	6.16123	6.12618	6.6103	6.48377	6.63842	6.47051	7.13797	6.18523	6.44863	6.04096	6.17886	6.37606	6.89903	6.22606	6.32604	6.61788	5.76394	6.26469	5.67526	6.32124	6.71501
AC091633.3	4.15006	4.078	2.94993	2.65706	3.19975	4.11774	2.7829	3.66375	2.74859	3.53213	5.13299	2.73159	4.42858	3.2512	3.61072	3.48953	3.64286	3.51027	2.43994	3.47961	3.25168	3.90066	3.53591	4.43389	3.5048	3.48627	3.25377	3.02852	3.30171	4.59484	3.32617	2.84598	4.08683	3.26859	4.30137	2.92347	3.49994	3.62964	3.2082	3.46341	3.55096	2.74409	3.31586	3.69696	3.13615	2.72817	3.48149	3.3762	3.55648
AC092155.4 /// BC038779	2.69065	2.28446	2.83979	2.46531	2.65113	2.46264	2.88838	2.35456	2.62063	2.5921	2.56377	2.76088	2.53634	2.47319	2.40565	2.79075	2.82547	3.06141	2.89182	2.62013	2.4777	2.38205	2.46149	2.46413	2.55785	2.87347	2.55915	2.95094	2.3025	2.54221	2.39391	3.00568	2.41948	3.03354	2.68992	2.29764	2.65927	3.01852	2.92401	2.64749	2.60974	2.77958	2.53769	2.39135	2.89377	2.77191	2.72087	3.00622	2.85743
AC092192.1	3.83255	4.28551	4.60016	7.31376	8.41464	4.33286	7.09046	5.86766	8.5493	7.2581	3.17279	7.74581	3.28709	4.79004	4.8589	7.65289	5.18636	9.09247	8.19275	5.00323	6.554	4.95796	3.35473	3.56542	4.3716	3.97511	4.10024	5.0362	5.56121	3.839	6.78356	8.30119	3.64591	6.36685	3.45621	5.0451	4.78844	6.42177	7.81359	6.85279	3.45119	4.6514	6.54128	4.66423	7.96682	7.75098	6.46902	6.232	4.2479
AC092620.2	7.83685	7.93696	8.03705	8.03681	8.17119	7.97816	8.47007	7.97227	8.45527	8.02653	7.68245	8.30927	7.8593	8.67745	8.71166	8.03567	7.49195	8.22499	7.8494	8.01975	7.90501	8.09999	7.43653	8.12516	8.096	8.3803	7.75285	8.56458	8.48845	6.89178	7.83763	7.4235	7.07799	8.35558	5.73075	7.97099	8.31638	7.06384	7.67165	7.50475	7.88808	8.13139	7.32713	8.32694	8.72988	8.1642	7.64699	7.67314	7.43035
AC092660.1	2.6387	2.4685	2.23966	2.47504	2.88429	2.3968	3.19394	2.38494	2.63488	2.29635	2.34891	3.07703	2.49849	2.61848	2.43571	2.54468	2.26484	2.65777	3.35755	2.24042	3.08919	2.5173	2.18524	2.36589	2.28846	2.41486	2.51838	2.02013	2.50645	2.3148	2.49822	2.24621	2.68518	2.47257	2.3283	3.03616	2.74943	2.32948	2.62482	2.53331	2.40005	2.28325	2.43099	2.67642	3.01903	2.63348	3.10322	2.66027	2.6887
AC092667.2	2.348	2.21572	2.91046	2.45978	2.51231	2.14677	2.28642	2.46282	2.39138	2.08082	2.76435	2.22676	2.18649	2.41732	2.11504	2.1644	2.59452	3.25739	2.88894	2.36842	2.47504	2.78172	2.23861	2.57064	2.07572	2.29558	2.27073	2.43021	2.28309	2.52275	2.11196	2.67156	1.96386	2.20939	2.69404	2.84195	2.36019	3.01085	2.87866	2.45189	2.36977	2.40366	2.23656	2.1016	2.31693	2.63691	2.60733	1.97669	2.46778
AC099684.1 /// BC040634	4.23407	4.0457	4.27782	3.96059	4.64589	4.56813	4.24839	4.28039	4.29169	4.10445	4.25779	4.04847	4.23407	4.10833	4.26244	4.34194	4.1597	4.54437	4.13838	4.10954	4.25261	4.3667	4.31107	4.08096	4.12442	4.298	4.57074	4.79099	3.89465	4.52335	4.34404	4.33534	4.29506	4.52406	4.48445	4.38284	4.5136	4.59911	4.39141	4.14198	4.33595	4.24173	4.16166	4.32079	4.11409	4.13276	4.26136	4.34527	4.03301
AC099850.1 /// BC017255	2.55218	3.41846	3.79122	2.90234	2.7446	3.33793	2.92567	2.9147	3.61534	3.11811	2.87035	2.46701	4.23005	2.5738	3.30181	2.50779	3.19266	2.55289	2.54279	2.61736	2.92699	3.05965	3.16982	3.6135	2.99197	3.1845	3.00071	3.19671	3.01606	3.70162	3.09969	3.02865	3.94566	3.63331	3.29935	2.90244	2.60742	3.45555	2.73602	2.79596	3.10499	3.43975	2.89509	3.00146	2.81786	3.32257	3.33953	3.25942	3.98796
AC100830.4	4.44881	4.82716	4.84446	3.83304	4.2317	4.1338	3.55087	4.02529	4.50555	4.23929	5.05717	3.63164	5.11635	4.36208	4.97879	5.21329	4.00477	3.75069	4.46449	4.21914	4.35112	4.55983	4.73893	4.2507	4.79284	4.6706	3.5233	4.40064	4.32582	4.9127	4.1729	3.7699	4.9111	4.05188	3.84109	3.98611	4.01747	3.08534	3.60854	3.98051	4.98502	3.70482	3.91581	3.82292	3.68039	3.5045	3.56214	3.12584	4.76181
AC104537.2 /// TCEB1P28	4.06358	3.70067	4.59418	4.35715	4.3934	3.59845	4.08048	3.95015	4.14951	3.88087	3.74633	4.09717	4.06806	4.06909	4.01299	4.4151	3.85343	4.8447	4.52245	3.9924	3.71971	4.3063	3.6972	4.35791	4.25117	4.37883	4.3557	4.47811	4.32889	4.21899	4.12386	3.76009	4.14892	4.75212	4.47883	4.38614	4.6228	4.31275	4.52725	3.76874	4.55176	3.92017	4.30119	3.64718	4.38052	3.63626	4.53135	3.97409	4.41291
AC104667.3	4.55367	4.08847	4.12137	4.14816	4.44714	4.04588	3.93186	4.53477	3.63754	3.72782	4.21227	4.44418	4.12464	4.28175	4.18365	4.51626	3.69152	3.97313	3.86232	4.15181	4.1589	3.79014	3.84339	4.07899	4.45821	4.10746	4.6113	4.23604	4.57649	4.26351	3.8637	3.51484	4.04439	4.4449	4.28903	4.23524	4.61605	4.48748	3.87469	4.05497	3.8899	4.25669	4.16748	4.04935	4.08335	4.21329	5.61753	4.11031	4.21192
AC106801.1	2.90397	2.78729	2.49273	3.2642	2.67029	3.05923	2.60345	3.37576	2.67405	2.49463	2.58984	2.762	2.7482	2.82857	2.87464	2.57499	2.59561	3.43751	2.57241	2.53154	3.10927	2.73277	2.29843	2.61071	2.76445	3.29637	2.72361	2.8162	2.76272	2.62022	2.54142	2.80166	2.6023	2.37577	2.77586	3.57977	2.79101	3.2142	2.60109	2.72748	2.79631	2.9417	2.95708	2.67866	3.09101	2.7213	2.69302	2.959	2.73299
AC108056.1	4.0044	4.37199	2.91162	5.3268	6.75728	2.72202	5.06183	3.63177	6.40769	5.81966	2.43269	4.71051	2.28832	2.65664	2.56954	5.18868	2.67075	7.11774	6.00561	2.88932	3.43223	4.04904	2.83839	4.34664	2.75572	2.74921	3.71612	2.99195	3.01059	2.55952	5.03963	5.56056	2.60895	4.13348	2.80186	4.5119	2.98725	3.02196	5.07113	5.19677	3.3942	2.82978	3.57542	3.30736	6.0706	4.80727	4.39408	3.01998	2.86928
AC112198.1	3.92848	4.07566	4.21896	5.27855	6.55938	4.58354	5.15299	6.04896	6.21331	5.59668	4.10983	5.98857	4.30355	3.77156	4.09777	5.32808	4.17621	6.68778	6.78137	4.76969	5.0613	4.29918	4.19896	4.12641	4.79523	3.79287	4.78161	4.32753	5.94434	4.00098	4.93513	6.29376	3.69764	5.78558	3.98191	5.23595	5.5385	5.1515	6.06427	4.99603	4.45484	3.91245	7.2638	5.01267	6.07569	6.59605	6.49316	5.6627	4.37826
AC114730.11	4.05828	4.29319	4.46394	4.59956	4.09899	4.03363	3.63762	3.65554	3.51127	3.64841	4.55885	3.70588	4.42814	4.45163	4.15538	4.32034	4.3043	4.21271	3.0763	4.69419	4.25727	4.2142	4.20034	4.33383	4.32904	4.31111	4.68723	4.01128	4.54699	5.18896	3.9925	3.20343	5.17247	3.9689	5.11209	4.35317	3.84393	5.03963	4.04581	3.25669	4.32997	4.12213	3.59053	3.94972	3.27063	3.5767	4.15649	4.14873	4.43906
AC114752.3	4.93219	4.83498	5.89755	4.53326	5.40903	5.75896	4.60005	5.03933	4.89527	5.02701	4.73784	4.95844	4.53296	4.73858	4.42679	4.57929	4.91386	4.61329	5.16151	5.2154	4.40758	4.88278	6.93767	6.44673	6.38323	6.64033	4.99944	5.43355	4.80064	4.67808	4.66265	4.70892	4.94345	4.74606	4.94974	4.78539	7.16677	6.61795	4.76891	4.66133	4.61046	5.15881	4.34846	4.18524	4.63158	4.12144	5.54874	5.4418	5.44158
AC124997.1	2.20988	2.68868	2.65322	2.51638	3.22377	2.3263	2.9952	2.78266	3.38216	3.39307	1.89869	3.92707	2.10894	2.40218	2.94836	2.91646	2.30045	2.08605	3.83797	2.97948	2.62381	2.79922	2.15622	2.50374	3.37397	2.13736	2.61434	2.76736	3.48231	2.32315	2.19109	2.70498	1.98264	3.08224	2.52368	4.44663	2.43038	2.21287	2.55217	2.22969	1.91249	2.51498	4.59377	2.86231	2.23093	2.6758	5.24783	2.32011	3.12427
AC128677.4 /// CH17-132F21.1 /// IGKV1OR-1 /// IGKV1OR-1 /// IGKV1OR10-1 /// IGKV1OR10-1 /// IGKV1OR2-2	9.81268	8.9458	7.77276	8.14625	8.60346	8.89682	9.09206	8.66664	7.03816	8.15372	8.4553	10.2849	9.66126	9.46448	7.93209	9.68404	9.882	7.4731	8.86858	9.31667	9.41484	6.92728	10.8641	8.28614	7.81484	6.39164	5.9431	7.96867	8.98133	10.1701	9.18252	8.09249	11.033	6.97766	8.7368	7.91911	7.02304	7.13201	9.60309	8.18516	7.14872	10.0889	9.04233	7.18026	6.78732	6.20464	8.87269	10.354	9.92967
AC136289.1	2.7631	2.2355	2.65322	2.3748	2.32379	2.35306	2.65602	2.40173	2.20112	2.56756	2.797	2.44438	2.6681	2.37411	2.25387	2.67135	2.66245	2.86874	2.27063	2.40761	2.38598	2.20398	2.19248	2.41511	2.55043	2.70653	2.77905	2.55947	2.3133	2.39313	2.28047	2.35203	2.40761	2.37365	2.38666	2.24871	2.47187	2.63331	3.05993	2.59235	2.3786	2.38343	2.41351	2.16749	2.23942	2.39495	2.55701	2.47536	2.2972
AC139100.2 /// PARD6G-AS1	3.74559	4.27995	4.84446	4.55996	4.35033	4.18522	4.37373	4.67739	4.50555	4.3747	4.79827	3.96297	4.83784	4.30773	4.34589	3.7776	4.68646	4.58824	4.04482	3.9625	4.4516	4.38704	4.4239	4.55011	5.16172	4.71891	4.90518	4.06565	4.14773	4.64791	3.75426	4.3954	4.56395	4.27749	5.02884	4.52724	4.26769	4.48395	4.23982	3.95374	4.34166	4.47458	4.09361	4.25537	3.92832	3.97303	4.49144	4.39429	4.69362
AC139100.3	2.31562	2.07888	2.17232	1.96184	2.0398	2.57215	2.36335	2.21448	2.5398	2.06985	2.44829	2.32253	2.37268	2.36057	2.29169	2.2067	2.09796	2.37485	2.68248	2.26059	2.07769	2.16745	2.27877	2.22571	2.32889	2.4483	2.36917	2.38645	2.33553	2.48141	2.24211	2.65534	2.13853	2.48697	2.348	2.16012	2.21517	2.76027	2.63687	2.28038	2.37682	2.1715	2.25748	2.56121	2.40667	2.31252	2.10696	2.33021	2.16436
AC141928.1	4.04758	4.08777	4.15049	4.16141	4.16376	4.01441	4.54317	4.33913	4.17154	4.28943	3.83158	4.47801	4.01337	4.0666	4.08326	4.11527	3.89656	4.29484	4.21347	4.01579	3.83866	3.88815	4.06409	4.1066	4.10196	3.92728	4.46966	4.37855	4.13282	3.87944	3.8765	4.2742	3.66161	4.03075	3.86506	4.35581	4.41713	4.26743	4.04904	3.87985	3.76344	4.30758	4.12556	3.94473	4.11876	3.89764	4.33688	4.06278	3.97393
AC144652.1	5.97648	6.99182	5.94452	5.77017	6.05683	6.31864	5.93109	6.10703	5.39365	5.92023	6.16952	6.01291	6.19581	6.29605	5.87838	5.56343	5.53289	5.58568	6.05885	5.98125	5.77318	5.7317	6.73514	6.43986	6.30683	6.20906	5.83523	6.04231	5.8405	6.60561	6.05778	5.72197	6.31211	5.63899	6.14718	5.7194	6.02852	5.95994	5.98074	5.71411	6.03037	5.69192	5.73806	6.03007	5.1532	5.53028	6.80806	6.61346	6.55555
AC145343.2	4.83884	4.15658	4.58848	4.24047	4.25163	5.36768	3.89763	4.67347	4.65505	4.07667	4.33924	4.00364	4.94561	4.41919	4.23038	4.14602	4.41066	4.121	4.13009	4.46374	3.76009	4.05018	4.05142	4.80046	4.14191	4.2473	4.1691	4.18377	4.40076	4.21746	3.95306	3.9192	4.11186	4.22923	4.46339	4.63448	4.5379	4.48888	3.66962	3.64644	4.09854	4.42969	4.68296	4.21908	4.41717	4.35018	4.68848	4.15898	4.48387
ACAA1	9.1838	9.11057	9.15673	9.89138	9.46144	9.472	9.74672	9.67899	9.49037	9.36543	9.55213	9.60524	9.27152	9.48597	9.81239	9.01351	9.63712	9.30728	9.16452	9.45455	9.71001	9.51325	9.40063	9.44565	9.55378	9.631	9.8559	9.72087	9.64866	9.23961	9.05479	9.52138	9.11117	9.23728	9.07536	9.57782	9.628	9.71392	9.47522	9.45172	9.55072	9.7259	9.53129	9.76301	9.61935	9.6945	9.31794	8.91166	9.4806
ACAA2	8.33745	7.92789	6.75228	7.05971	6.55571	6.94073	7.41993	7.93344	5.74357	7.93099	6.96112	5.74789	7.2478	6.57461	6.17719	7.27785	7.13533	7.33704	5.78364	6.57332	7.16475	7.16415	6.75186	7.21066	6.99163	6.94215	7.12844	7.11507	5.85287	8.03792	8.07168	6.41967	7.7523	7.30904	8.50192	6.6689	6.0013	6.03722	6.46723	7.47059	7.41454	6.56225	7.73654	7.03555	6.00515	7.58807	6.3533	7.60543	7.02828
ACACA	6.35611	6.09227	6.35049	5.99484	5.73346	6.39295	6.27996	6.3148	5.95198	6.35166	5.90034	6.32368	6.60579	6.22516	5.71239	6.25925	6.55192	6.09845	6.42934	6.50765	6.5491	5.96173	6.42697	6.22072	6.06546	6.07977	6.12409	6.11669	6.05944	6.82993	6.4066	6.69144	6.82259	6.32125	6.90315	6.43529	6.19704	5.97827	6.29729	5.95385	6.09296	6.13167	6.34452	6.11491	5.67294	6.26581	6.40299	6.54213	6.05829
ACACB	7.35882	6.94766	7.45813	6.92023	7.49437	6.98925	7.24847	6.9325	7.51286	7.55185	7.99395	7.28999	7.10661	7.1566	7.21981	7.57268	6.99359	7.37389	7.64455	7.49449	7.30098	7.26408	7.17244	6.81419	7.12986	7.29465	7.31935	6.69914	6.88589	6.82847	7.38061	7.63984	6.93321	7.54123	6.94773	7.18503	7.33657	7.24094	7.18271	7.24718	7.08169	6.84401	6.92163	7.48096	7.29366	7.26688	7.11017	7.19121	7.14435
ACAD10	5.54063	5.72193	5.79035	4.91066	5.31754	5.52477	5.14324	5.09284	5.41397	5.09868	6.19015	5.14701	5.22895	5.41852	5.66144	5.23627	5.35276	4.99652	4.66284	5.65142	5.18271	5.85874	5.51354	5.53141	5.36535	5.47877	5.42033	5.22813	5.47323	5.04085	5.12322	4.92467	5.56243	5.59403	5.24641	4.74085	5.21883	5.08635	5.22417	5.28228	5.96235	5.62916	5.24207	5.60213	4.96852	5.18123	5.555	5.31135	5.27362
ACAD11 /// NPHP3 /// NPHP3-ACAD11	7.84799	7.86081	7.78446	7.04499	7.37676	7.79339	7.10855	7.32259	7.12004	7.80086	7.84256	7.06791	6.86024	7.34507	7.65275	7.08105	7.7315	7.83082	7.38083	7.77118	7.56775	7.28053	7.65475	7.29577	7.15898	7.56824	7.22315	6.81815	6.98033	6.12046	7.73918	7.4212	7.29697	7.41879	6.63589	6.89493	7.06954	6.68786	7.14535	7.54755	7.89131	7.32967	7.86302	7.17367	6.59496	7.23808	6.93931	7.78669	7.09677
ACAD8	6.60882	6.7757	6.68128	7.40124	5.84215	6.47373	5.48279	5.79438	6.20561	6.66694	7.0027	5.88692	6.35912	6.90433	6.98032	6.37601	6.50313	5.88493	5.70009	6.76766	6.6649	6.89742	6.58644	6.45164	6.9291	7.29556	6.30993	6.33009	6.10323	7.01254	6.51685	5.81901	6.6639	6.18438	6.29664	5.72135	5.89634	6.36495	6.0894	6.18589	6.74449	6.47258	5.97722	6.81351	6.278	6.83274	6.13048	6.42542	6.18538
ACAD9	7.24255	7.23014	6.79678	6.68347	6.38438	7.0446	6.42534	6.90762	6.56233	7.02585	7.11242	7.0017	7.6564	6.74332	6.88867	6.93249	7.37487	6.91531	6.84539	7.13667	7.0653	7.01466	6.89739	7.16434	7.02404	6.54617	6.7696	6.70014	6.71421	7.53811	7.11485	6.05029	7.71121	6.64793	7.72701	6.79397	6.7768	6.87255	6.70896	6.99746	7.33953	6.72999	6.94056	7.6762	5.74619	6.87506	7.25164	7.80273	7.20442
ACADL	2.66182	2.39208	2.58095	2.72193	2.94083	2.66628	3.0626	2.75664	2.74368	2.9015	2.6305	3.1006	2.504	2.46644	2.48404	2.47713	2.44294	2.95503	2.56526	2.41878	2.68508	2.95843	2.49831	2.55126	2.88159	2.29929	2.39007	2.66635	2.60442	2.54493	2.37821	4.1354	2.46615	2.82624	2.60681	2.7477	3.00774	2.80966	3.60903	3.07791	2.48694	2.35231	3.46437	2.51704	2.9729	2.95905	2.72197	2.64844	2.63804
ACADM	7.51251	7.52698	7.34978	6.95807	6.36285	7.39097	6.37799	7.22897	6.87395	7.28362	7.51642	6.82685	8.01494	7.18225	6.93895	7.71459	7.71207	7.07339	6.73422	7.66619	7.20888	7.03103	7.60489	6.87308	7.19871	6.90925	6.74664	7.22478	6.89962	8.39566	7.52477	6.58537	8.03773	6.87412	8.13994	7.46791	6.66653	7.12152	6.85588	7.00111	7.06998	6.87949	6.15765	7.10369	6.30011	7.04046	6.92985	7.62411	7.46698
ACADS	6.57884	6.31666	6.06363	6.16657	6.28216	6.56308	6.44533	6.41133	6.3073	6.46661	6.68551	6.88562	6.7948	6.46515	6.47857	6.3157	6.4715	6.71442	6.27579	6.32735	6.37789	6.13342	6.37059	6.5939	6.51878	6.48516	6.66391	6.4642	6.25198	6.64798	6.30013	6.27221	6.82269	6.19776	6.94444	6.28785	6.8095	6.70495	6.06111	6.30365	6.49039	6.80996	6.33689	6.35558	6.27801	6.35304	6.45647	6.29669	6.43839
ACADSB	6.86981	6.84403	6.80121	6.50641	6.00696	6.84738	5.92262	6.06102	6.49378	6.6372	7.27545	6.38337	7.31339	6.29182	6.27227	6.66148	6.43302	6.63868	5.92422	6.46568	6.37353	6.33354	6.71173	6.30806	6.52484	6.39254	6.24409	5.76748	6.3541	7.19506	6.95024	5.97023	6.79476	6.5533	7.09423	6.24822	6.09969	6.29089	6.03373	6.62228	7.14126	6.04967	6.34602	6.2027	6.02008	6.34978	5.92182	6.72221	6.52635
ACADVL	9.73278	9.76684	9.46209	9.46385	9.19654	9.34214	9.40774	9.53721	8.95849	9.63306	9.837	9.15912	9.44114	9.33445	9.53082	9.13458	9.50049	9.71169	9.17871	9.63718	9.49943	9.49901	9.15781	9.63466	9.46383	9.34193	9.38343	9.13127	9.57829	9.08049	9.0768	9.0917	9.09882	9.48608	9.01295	9.2432	9.41657	9.2148	9.00404	9.43685	9.8878	9.23447	9.95035	9.45176	8.51865	9.24057	9.34829	9.23229	9.43124
ACAN	5.20556	4.81119	4.86651	5.07779	4.8792	4.8323	4.92554	5.09748	5.20377	4.87639	4.88028	5.4897	4.93234	5.09194	4.99898	4.71164	5.01828	4.62817	4.98994	4.89895	5.05492	4.67285	4.82069	4.96718	5.04793	5.15472	5.29359	5.07909	5.1063	4.90772	4.68101	4.67385	4.55743	5.09236	5.15933	5.36134	5.34354	4.94646	4.86078	4.6695	4.68475	5.33322	4.89551	5.03519	4.84713	4.64129	5.11277	4.97617	4.83047
ACAP1	9.21991	9.21536	9.37856	10.1778	9.08516	9.23607	9.3078	9.28987	9.14607	9.28011	9.6827	9.21207	8.87787	9.52709	9.79547	9.13547	9.54365	9.40767	9.10137	9.37649	9.34372	9.03124	9.3447	9.25741	9.34166	9.47782	9.62209	9.33335	9.94518	8.9097	8.78727	9.11494	8.49072	9.08766	8.66911	9.13073	9.73829	9.50038	9.12218	9.10775	9.49	9.99297	9.62331	9.50003	9.19412	8.93052	9.32754	9.40609	9.41002
ACAP2	9.02831	9.33881	9.6279	9.58009	9.73082	10.0291	9.74982	9.86673	9.77497	9.20415	9.16012	9.44611	8.50446	9.98268	10.07	9.03535	9.55548	9.20701	8.87821	9.25805	9.30682	9.93609	9.49555	9.91747	9.69119	9.87992	9.88647	9.9528	10.1417	9.02982	9.19741	9.21673	8.6859	9.69521	8.59313	9.56017	9.57389	9.62437	9.52191	8.96237	9.39957	10.121	9.01429	9.74277	9.93792	9.9936	9.98372	9.35991	9.71819
ACAP3	5.29284	5.38576	5.48808	4.93188	4.81904	5.42931	4.43837	5.27205	4.4763	5.18602	5.73811	4.56599	5.23295	5.32543	5.6451	4.93037	5.34372	5.09218	4.80426	5.5823	5.13207	5.36929	5.2949	5.28465	5.31548	5.32569	5.64241	5.34154	5.22633	5.35883	5.05868	4.13337	5.15865	4.98103	5.24333	5.21662	5.68349	5.55757	4.66651	4.78904	5.79685	5.42872	4.81792	5.44421	4.58049	4.99922	4.69815	4.89543	5.0834
ACAT1	4.26522	4.51271	4.62866	4.71895	4.36346	4.58473	4.70277	4.14258	4.83301	4.87842	4.55366	4.49956	4.57836	4.90326	4.30975	5.61202	5.45169	4.70285	5.05419	4.72822	4.1559	5.27619	4.66272	4.18225	4.21459	4.66053	4.72109	3.91018	4.04721	4.88952	5.11012	4.88849	4.89461	3.96432	5.04508	4.03067	4.20197	4.01823	4.60157	5.10064	4.75435	5.00244	5.14347	4.12693	4.58216	3.84725	4.48922	5.08052	4.05006
ACAT2	8.76871	8.53631	8.50646	8.17462	7.64201	8.60385	8.30419	8.31201	7.56433	8.40091	8.7044	8.16206	9.18922	8.36162	7.88039	8.49974	9.04577	7.81979	8.0646	8.74785	8.48877	8.24024	8.63848	8.44784	8.63124	8.54383	8.3735	7.87373	8.45923	9.50297	8.59739	8.14087	9.49063	8.13331	9.38605	8.20079	8.49496	8.4723	8.43997	8.076	8.48774	8.37265	8.65767	8.18907	7.39785	8.24398	8.26436	8.90223	8.7808
ACBD3	7.84926	7.92928	7.96246	7.54514	7.3727	7.84917	7.52565	7.6425	7.86099	7.93314	7.7641	7.99589	8.31696	8.42988	8.45185	7.99845	7.57625	8.00291	7.279	7.92291	7.20655	7.82102	8.06827	8.24512	7.73372	7.52043	7.79608	7.60663	7.76755	8.46547	7.94954	8.03803	8.56554	7.87988	8.43706	8.13125	7.40602	7.5465	7.52872	7.89027	7.96563	7.67265	7.65808	7.93605	7.77065	7.3259	7.78047	8.17215	7.71439
ACBD4	5.90092	6.45847	6.00559	5.4939	5.22107	5.62354	5.35268	5.26374	5.3728	5.92564	5.95771	5.41488	5.78837	5.8868	5.86745	5.69711	6.01797	6.35539	5.45198	5.82756	5.81558	5.7372	5.93824	5.56166	5.67908	5.64177	6.1288	5.46573	5.60283	5.59767	5.90843	5.52856	5.70706	5.58953	5.28932	4.89979	6.06601	5.97435	5.34603	5.96661	5.92709	5.75707	5.75131	5.57983	5.4851	5.71766	5.50606	5.93037	5.99596
ACBD5	7.9973	8.05139	7.91403	7.7142	7.9432	8.14542	7.66603	7.93471	7.72923	8.00785	8.12063	7.37418	8.18327	8.06147	7.86039	8.28488	8.05354	7.51497	7.76898	8.25262	7.93677	8.11	7.90997	8.04787	8.01889	7.89336	8.0828	7.7557	8.00475	8.15591	8.02516	7.13662	8.33474	7.86306	8.30796	7.89638	7.89187	8.13591	7.92612	8.08328	8.15869	8.12313	7.76851	7.94264	7.55502	8.10078	7.41	8.10042	8.15336
ACBD6	7.75881	7.36914	7.27363	7.61937	7.23387	7.43026	7.08333	7.23399	7.02244	7.27667	7.57693	7.0504	8.57851	7.36514	7.69555	7.34906	7.53765	7.40258	6.80571	7.80816	7.33737	6.91711	7.23653	7.54165	7.54362	7.48003	7.48003	6.99503	7.48528	8.09646	7.33371	6.72959	8.01311	7.80455	8.19371	7.12405	7.26646	7.48003	6.89559	7.05734	7.61251	7.20502	7.76593	7.09728	7.06855	7.06484	7.34443	7.28642	7.60277
ACCS	7.56605	7.66205	7.68508	6.43562	8.48941	7.74961	7.39116	7.03025	7.21013	7.83458	7.92168	7.19351	6.58828	7.47055	7.67652	7.68883	7.06396	7.74904	7.54685	8.06034	7.67056	9.07983	7.52964	7.50493	7.38995	7.37068	7.5541	7.37596	7.40683	6.41385	8.8753	7.21585	6.75959	8.90828	7.298	8.63271	7.57006	7.08396	7.4252	7.14023	7.90281	6.5545	7.57541	9.19644	6.67916	7.52127	7.48139	7.00687	7.07297
ACD	9.18974	9.04886	8.96163	8.82849	8.63437	8.90034	8.42461	8.97728	8.40555	8.92165	9.05804	8.34261	8.87968	8.6262	8.67559	8.69875	8.91085	8.93956	8.6677	8.87885	8.89405	8.84517	9.10189	8.53007	8.88667	8.89748	8.67832	8.73359	8.52673	8.79435	8.9986	8.27825	9.03286	9.07299	9.24574	8.42775	8.69825	8.9186	8.31991	8.80388	9.11024	8.75399	8.82925	8.63511	8.22188	8.76836	8.36383	8.90793	9.04724
ACE	3.83966	3.66273	3.74097	4.02061	3.6421	3.50205	3.61816	3.75076	3.58906	3.39672	3.551	3.74444	3.88989	4.07101	3.81318	3.6915	3.58573	3.90607	3.34478	3.77927	3.74652	3.73578	3.53627	3.75103	3.73765	3.98136	3.95709	3.72779	3.61277	3.68005	3.75196	3.81418	3.55883	3.76147	4.02607	3.47481	3.62727	4.23584	3.38875	3.54334	3.91637	3.91805	3.90738	3.61157	3.56327	3.36677	3.66684	3.4745	3.49013
ACE2	2.4489	2.23111	2.27481	2.39115	2.61877	2.34604	2.49508	2.27232	2.52395	2.14353	2.54005	2.58967	2.22053	2.35653	2.31286	2.42362	2.42078	2.87982	2.54875	2.3018	2.37208	2.31941	2.41972	2.23962	2.37859	2.28423	2.58779	2.58588	2.49872	2.2062	2.25793	2.67932	2.19937	2.57676	2.28194	2.49931	2.43883	2.37926	2.36078	2.20701	2.26818	2.3091	2.64608	2.43328	2.48055	2.13698	2.55753	2.75425	2.36887
ACER1	4.00833	4.28053	3.97863	3.9951	3.46549	3.74974	3.85933	3.91143	3.60583	3.61352	3.30639	3.43427	3.76607	4.1921	3.96983	4.00952	4.03608	3.25739	3.75019	4.01989	4.18335	3.46693	3.85716	3.7139	3.63399	3.93444	3.81193	3.78158	3.88618	3.80738	3.76649	3.08402	4.25167	3.45131	3.9565	3.82539	3.88854	3.65827	3.63036	3.81175	3.05428	4.01502	3.81606	4.06025	3.68039	3.84408	3.695	3.63142	4.07201
ACER3	7.2695	7.72276	8.00153	9.02965	7.58833	8.16831	6.99953	7.54772	7.27048	7.86894	7.85714	7.61583	8.60725	8.0466	8.02901	7.95364	8.4161	7.24805	7.46872	8.02192	7.96059	8.59509	8.05585	8.79389	8.57461	8.56506	8.28722	8.03804	8.73224	8.80546	7.56431	7.13232	8.84178	7.61146	8.3156	8.13608	8.62307	8.54571	7.53695	7.07963	7.90238	7.97415	7.0998	8.15169	6.90916	7.75702	8.04827	7.46335	7.86768
ACHE	4.21018	3.98617	3.771	4.32366	3.86858	4.0782	4.06921	3.8111	4.20763	3.89019	3.94995	4.52369	4.62288	4.40609	4.36882	3.90042	3.74631	4.08454	4.0123	4.1499	4.15959	4.08801	4.61115	4.37949	4.12811	4.28117	4.8401	4.14986	4.17077	4.21171	3.98491	3.76462	4.16323	4.32469	4.30422	3.86773	4.53943	4.31832	3.84299	3.75147	3.7083	4.60617	4.06987	4.10808	4.26538	3.91162	3.67456	3.8059	3.90159
ACIN1	8.08393	8.01153	7.95183	8.08022	7.76184	7.9828	7.97869	7.8312	7.88038	7.78932	8.04119	7.95399	7.33432	7.87013	8.01304	7.76663	7.7944	8.24209	7.73537	7.87607	8.17707	7.98541	7.91454	8.00986	7.8838	7.93957	8.01737	8.02834	8.18688	7.31536	7.77453	7.36929	7.62239	7.77819	7.19061	7.8318	7.7987	7.85218	7.8205	7.8052	8.00238	8.23798	7.37037	7.9564	7.98477	8.03956	7.37615	7.94302	7.76677
ACKR1	3.35875	3.60821	3.52979	3.49833	3.73059	3.4799	3.63682	3.67578	3.1034	3.84715	3.26688	4.01228	3.55085	4.16411	5.72624	3.87188	3.40637	3.33775	3.98646	3.32789	3.36666	4.00049	3.34791	3.82052	3.76692	3.89636	3.76826	3.57269	3.00562	3.23636	3.55033	3.87399	3.67182	3.61027	3.42747	3.66327	3.99787	3.73602	2.97716	3.74606	3.38693	3.76468	3.78047	3.54342	3.84033	3.28122	3.5458	4.39133	3.29838
ACKR1 /// CADM3	3.05921	2.90332	2.61404	2.88452	2.93412	2.56513	2.64149	2.90614	2.77092	2.93692	3.33161	2.63082	2.85812	2.8558	2.91844	2.4954	3.10728	3.33275	2.82655	2.89287	2.97929	2.4279	2.60108	3.11253	2.70861	2.85216	3.14846	3.07308	2.81633	2.99157	2.60099	2.94396	2.81716	2.74632	2.87496	2.71325	3.18326	2.66796	2.74413	2.8286	2.82323	3.11131	2.63336	2.56779	2.56123	2.55551	2.70398	2.71669	2.62965
ACKR2	4.00963	3.70011	3.6845	3.55313	4.42421	3.72743	3.88468	3.91685	3.60407	3.80416	3.72888	3.57025	3.8918	3.55092	3.86571	3.49475	3.76534	3.26754	4.12721	3.21407	3.5005	3.76347	3.68406	3.78292	3.24248	3.75096	3.82313	4.09084	3.58884	3.35545	3.30884	4.29904	3.41223	4.00776	3.60491	4.14954	3.99106	4.16106	4.26586	3.70757	3.6785	3.53774	3.71019	3.5379	3.66516	3.10124	4.38323	3.7687	3.73156
ACKR3	5.18754	5.2866	5.33082	4.42879	4.91891	5.34565	4.96776	5.04773	5.30614	5.28083	5.19503	4.88305	5.24882	5.00336	4.81492	5.10474	5.19926	5.08134	5.18073	5.35483	5.82132	4.72856	4.96283	5.05186	5.07006	5.04863	4.76688	4.97845	4.92622	5.69484	5.62811	5.28612	5.22794	4.93021	5.90402	5.14018	4.92887	5.0682	5.14645	5.28776	5.18041	5.07191	5.18041	5.0174	4.71229	5.22237	5.13124	4.97106	5.16094
ACKR3 /// AK023507	5.74808	5.67889	5.82696	4.68168	5.25834	5.56979	4.89478	4.98463	5.95796	6.10585	4.9912	5.03046	6.48776	5.24275	6.11912	6.06285	5.31832	5.6299	5.90879	5.72576	6.12695	5.44251	5.77701	5.14058	5.51281	5.27228	5.01267	5.34786	5.31788	6.17708	6.40632	5.29704	6.14615	5.45258	6.24017	5.9214	5.77824	4.69605	5.47086	5.13424	5.66779	5.79431	6.08597	5.79183	5.46035	5.15789	5.84829	5.85866	5.46045
ACKR4	4.28534	4.03596	4.66472	6.22103	6.11537	3.67708	6.09411	5.97275	6.47117	5.3477	3.88333	5.91261	3.58246	3.84958	4.51713	4.6357	4.07138	5.26469	5.65815	4.89088	4.72141	4.32669	4.08324	4.69445	4.34013	4.16363	3.55412	5.1569	5.81793	3.24241	5.27549	7.11805	3.57316	5.45368	2.7827	5.87387	5.00804	3.70591	6.46075	5.887	4.04488	3.79199	6.71639	4.87682	6.40048	5.50014	6.38	6.202	3.93519
ACLY	8.53809	8.15088	8.1775	8.72011	8.44781	8.41105	8.5507	8.72551	8.24638	8.41774	8.62221	8.16205	8.82727	8.2842	8.54492	8.31684	8.36023	8.33345	8.32108	8.70991	8.52901	8.35735	8.26768	8.53232	9.02122	8.50359	8.62412	8.69114	8.60001	8.83813	8.56671	8.35553	8.59169	8.77789	8.89174	8.82219	8.47972	8.60335	8.46264	8.30227	8.45927	8.30511	8.98062	8.88314	8.31887	8.60071	8.75694	8.25545	8.48198
ACMSD	2.11853	2.20745	2.16674	2.08832	2.49778	1.95905	2.57777	2.37485	2.84105	2.33172	2.11462	2.69985	1.86363	1.98333	2.08148	2.26725	2.20341	3.83627	3.04203	2.10331	2.34005	2.6175	2.14445	1.88664	2.09981	1.90778	2.12531	2.20228	1.91345	2.0739	2.17252	2.88167	1.92374	2.24795	1.93239	2.45378	2.16529	2.19429	2.5568	2.39128	2.313	2.26035	2.32601	2.1077	2.22541	2.11144	2.07455	2.64667	2.06864
ACN9	7.22994	7.18357	7.62398	9.31282	6.89468	7.27213	6.55291	7.34326	7.11018	6.8728	7.52656	6.11132	8.35879	7.29423	7.25764	6.94402	7.49345	6.37815	6.39097	7.08962	7.84121	7.21184	6.93557	7.88403	8.05063	8.2043	8.18862	7.45659	8.52926	8.27547	7.21412	5.89345	7.68077	7.50729	7.99027	8.00605	7.35924	8.00138	6.48225	6.59069	7.35974	8.33824	6.24405	7.35625	7.54352	6.85878	6.88135	7.11814	8.13962
ACO1	5.5586	5.50687	5.25436	5.17803	5.44454	5.95275	5.01494	5.42134	5.49102	5.24778	5.72553	5.02212	5.48693	5.45809	5.53674	5.45962	5.54343	5.53728	5.35724	5.59811	5.60487	5.93969	6.10116	5.84793	5.85463	5.6448	5.03091	5.53357	5.80403	5.27472	5.2304	4.84408	5.50805	5.12549	5.55108	5.86973	5.14989	5.17382	5.44268	5.16191	5.25139	5.59158	4.66219	6.12334	5.53606	5.98159	4.68874	5.76579	5.33142
ACO2	6.27754	5.87713	5.77742	5.49383	5.58163	5.99113	5.40153	5.79017	5.40093	5.74955	6.01103	5.84708	6.49936	6.09684	6.03672	5.8045	5.85006	5.60135	5.15681	5.94602	5.68961	5.81043	5.74081	5.78133	6.22495	5.90655	6.00896	5.95023	5.79475	6.34007	5.89642	5.3398	6.48818	5.82278	6.52527	5.95815	5.88138	5.90609	5.45229	5.57314	5.92585	6.05049	5.73951	5.96682	4.64576	5.80049	5.68227	5.37866	5.94238
ACOT1 /// ACOT2	6.47615	6.66033	6.30086	5.36161	5.34214	6.34663	5.90875	5.78492	4.74542	6.13751	6.42649	5.63957	7.55032	6.14615	5.82597	5.89801	6.37238	5.32949	5.92334	6.44226	5.72115	6.08079	6.43975	5.87113	5.80341	5.75197	5.73682	5.8319	5.16209	7.00286	6.77088	5.22791	7.10387	6.09052	7.23646	5.9606	6.41102	6.72644	5.90012	5.73191	6.54384	5.86347	5.588	5.82509	4.53058	4.30915	6.16339	6.85216	6.46837
ACOT11	4.88165	4.37627	4.76194	4.59189	4.84518	4.66329	5.02257	4.58583	4.63367	4.64136	5.02289	4.84606	4.50073	4.58633	4.81543	4.83	4.99777	4.61596	4.86834	5.13596	4.81431	4.75555	4.48236	4.67859	4.39168	4.96263	4.9004	4.93872	4.79092	4.57991	4.55617	4.82578	4.5995	4.90599	4.69698	5.0628	4.94794	4.84445	4.60156	4.5692	4.64614	4.92233	4.80933	5.25467	4.84969	4.48757	4.83964	4.64709	4.52438
ACOT12	2.74788	2.71006	2.30919	2.67773	2.65386	2.44253	3.32141	2.56582	2.62516	2.38167	2.55221	3.24788	2.69467	2.44397	2.3552	2.98182	2.57218	3.21572	4.18703	2.56949	2.57853	2.47661	2.38142	2.5818	2.08905	2.50358	3.09105	2.56582	2.83323	2.18374	2.01856	4.61127	2.43747	3.69854	2.88962	3.19712	2.54266	2.60155	3.77566	3.33299	2.53417	1.96597	3.41513	2.3609	3.21623	2.85215	3.2857	3.03418	2.65935
ACOT13	9.94354	9.80201	9.58727	9.47458	9.83935	9.98927	9.63148	9.83315	9.53983	9.6152	9.75599	9.59033	10.3992	10.0643	9.62796	9.6758	10.2583	9.41331	9.13525	9.87408	9.75773	9.9802	9.72946	10.1523	9.85046	9.89158	10.1316	9.81912	10.1266	10.0852	9.62641	8.89681	10.2876	9.83907	10.4144	9.97784	9.93176	10.2131	9.80574	9.54838	9.78947	10.2025	9.19092	9.67645	9.3594	10.1875	9.9181	10.1735	9.9807
ACOT4	5.68986	4.99318	5.68143	4.34355	4.35435	4.68696	4.62352	5.23524	4.28999	5.20148	6.67347	3.71641	5.83271	4.46995	4.91809	4.75091	5.41052	4.9421	4.5755	6.14445	4.30596	3.7377	5.42622	4.87919	4.81918	4.86415	4.87858	4.46123	4.79606	6.7992	6.73296	4.40921	6.13635	4.8815	7.30045	5.61464	4.69009	3.72732	4.92412	4.75925	6.35473	6.06305	5.19263	5.73834	3.16705	5.45556	5.03162	6.16985	5.54491
ACOT6	3.07021	2.71528	3.19014	3.02787	3.12948	2.81715	2.87533	2.86147	2.56047	2.55841	3.18754	2.68562	2.86269	3.0033	2.7515	2.83804	2.93976	3.00372	2.76911	2.51374	2.97207	2.87471	2.87759	2.8621	2.86362	2.64781	3.03302	3.24895	2.6572	2.88543	3.09599	3.11107	2.56678	2.69566	2.79107	2.93079	3.00879	3.10468	2.71528	3.17124	2.85323	2.84372	2.80452	2.79667	2.95591	2.50807	3.10689	2.75351	2.95357
ACOT7	5.90789	5.93457	5.47785	5.97371	4.99977	6.1174	5.66782	5.82727	5.32428	5.46676	6.0004	5.42756	6.581	5.91456	5.79152	5.525	5.92159	5.8274	5.14863	5.96347	5.82526	5.63689	6.41406	5.89734	5.91124	5.70805	6.13502	5.64217	6.05786	6.24794	5.75361	5.181	7.18405	5.65615	6.48765	5.7246	5.96917	5.7652	5.807	5.7107	5.88842	5.83871	5.97612	5.78427	5.13342	4.99085	5.77576	6.18318	6.30077
ACOT8	6.16183	6.29565	5.89107	6.31766	5.42223	6.4108	5.5073	5.99359	5.61589	5.51328	6.83314	5.65974	6.87136	6.4084	6.09349	5.38633	6.30589	5.78932	5.63107	6.28447	6.17023	6.20386	6.1408	6.43869	6.53864	6.11132	6.28932	6.03425	6.02734	6.40781	5.90792	5.06941	6.56609	5.83824	6.79854	5.8574	5.93159	6.76693	5.36244	5.50394	6.47483	6.45812	5.31461	6.15372	5.32813	6.32553	5.67521	6.21146	6.4727
ACOT9	10.7846	10.976	10.3724	10.3087	10.6127	11.2558	10.9115	11.0437	10.8791	10.3383	11.0142	11.0416	10.6981	11.0884	11.2182	10.4071	10.8043	10.9341	10.9066	10.9144	10.951	10.9683	10.88	11.1204	10.4934	10.7471	10.8846	11.248	10.8817	10.751	10.8673	10.4805	10.8951	10.5899	10.5363	10.9214	11.1241	11.3301	11.0551	10.3844	10.6371	11.3291	10.3117	11.2041	10.8492	10.9515	10.6627	10.694	10.6531
ACOX1	8.63705	8.50464	9.48889	9.50229	8.6455	8.83454	9.17968	9.2539	9.19146	9.21628	8.69601	8.78861	7.65009	9.73932	9.83865	8.09351	8.84488	9.07401	8.36651	8.66042	9.4367	9.2272	8.70343	8.84906	9.71366	9.65344	10.0937	9.57545	9.5491	8.42727	8.63229	8.99411	7.94268	8.84497	8.05322	9.31755	9.93849	10.0642	9.30808	9.11793	8.6086	9.40892	7.99659	9.25497	9.85324	9.4234	9.40737	8.51538	9.10725
ACOX2	4.19093	3.67629	3.96103	4.31	3.51041	4.06202	4.86537	4.41224	4.19675	3.8441	3.56444	4.76884	4.79656	4.39423	4.19329	3.60172	4.07938	4.26426	4.64064	3.91146	4.29079	3.99183	4.46928	4.04259	4.69743	4.57392	4.5244	3.67705	4.89597	5.71242	3.66673	4.15839	4.60445	4.30564	5.07274	4.19758	6.78637	5.56503	4.33629	4.07506	3.85452	4.19637	4.29742	4.58547	4.6017	4.64609	3.98542	4.0851	4.27305
ACOX3	5.87394	5.78768	5.85474	5.6389	5.01314	5.9688	5.14266	5.92516	5.23689	5.75422	6.12305	5.24162	6.59348	5.98533	6.10342	5.48574	5.64339	5.44534	5.16681	5.89079	5.34772	5.99158	5.6272	5.72572	6.08925	5.66937	5.85903	6.21875	5.54701	6.5329	5.86456	4.52039	6.38537	5.7006	6.45535	5.95821	5.76877	6.28268	5.02921	5.24836	6.14358	5.86169	5.54047	5.52851	4.81027	5.42868	5.23364	5.33057	5.89865
ACOXL	3.38964	3.35783	3.40272	3.68724	3.42911	4.14884	4.07994	3.70424	3.42096	3.01959	3.49276	3.39869	3.18189	3.40181	3.79441	3.03005	3.64033	3.88581	2.98164	3.33342	2.99722	3.31975	3.80226	3.48865	3.23969	3.4047	3.14057	3.50362	3.86762	3.43791	3.37012	3.63459	3.3224	3.85932	3.28716	3.5791	3.39011	3.44416	3.6331	3.35116	3.06257	3.92596	3.37256	3.81946	3.40796	3.41599	3.45707	3.65823	3.81288
ACP1	9.07546	8.84974	8.64656	8.5097	8.20013	9.0052	8.58873	8.67238	8.12435	8.97115	8.63573	8.63642	10.0413	8.84227	8.38288	8.91071	9.15587	8.39158	8.65822	8.95907	8.72958	8.82089	9.26262	9.13274	8.73704	8.65656	8.98672	8.43676	8.4685	9.69619	9.02508	8.3238	9.78229	8.69857	9.84772	8.6288	8.51717	9.01001	8.79212	8.86861	8.94179	8.66967	8.66414	8.39312	7.82339	8.67568	8.47317	9.16442	9.1379
ACP2	7.09697	6.84648	6.5341	5.73196	6.22776	7.05532	6.52202	7.26129	6.10818	6.25964	6.84105	6.54219	7.58827	6.83149	6.35948	6.89664	6.24748	6.1348	6.47846	7.01229	7.25355	7.51687	6.84486	7.09347	6.7542	6.77826	6.52824	6.15873	6.58622	7.58676	7.06409	6.18563	8.30418	6.32602	7.80648	7.32465	6.56457	7.04901	7.13647	6.40086	6.67178	6.62114	6.59605	7.1011	5.30793	7.17665	6.11813	6.27285	6.16219
ACP5	6.68718	6.41986	5.87789	6.50578	5.79744	6.68959	5.35455	6.42281	5.89193	6.76106	7.31406	5.83147	7.77775	6.36935	6.21821	6.20059	6.08178	5.60792	6.25823	6.99533	5.93625	6.39025	7.05983	6.20438	6.69564	6.00009	6.58043	6.33078	5.66487	6.85361	5.89303	5.14282	7.65	6.01929	7.4113	6.33502	6.21467	6.6852	5.67443	6.79115	6.43398	5.90744	5.9732	6.40972	5.09467	5.48837	6.20424	6.92673	6.85956
ACP6	5.49075	5.68215	5.58843	6.26911	5.25661	5.08777	4.64166	5.1778	4.85072	5.35646	5.67889	4.76626	5.47145	5.59901	5.26809	5.22304	6.44644	5.06438	4.70103	4.9039	5.03345	5.32065	5.49176	5.19868	5.32978	5.40167	5.58042	5.99852	4.77876	6.19353	4.80017	4.19178	5.11876	4.79863	5.63305	4.93739	5.94799	5.69113	5.17532	5.21291	5.32932	6.04933	5.21805	5.49773	5.09267	4.8671	5.25929	5.4208	5.27377
ACPP	6.55608	6.7016	7.42703	7.17283	5.30964	7.4488	5.90002	6.75245	5.99611	6.82235	7.68331	5.88447	7.58307	6.94864	7.29001	6.12676	8.14954	6.27586	5.52826	6.88759	6.31631	7.10603	6.03631	7.57835	7.8753	8.4723	7.27212	6.75856	6.34922	8.44117	6.17233	5.8271	7.45798	6.53457	7.57626	6.99937	7.00562	7.11237	5.0951	5.96023	7.26088	6.13355	5.47688	7.26913	6.60945	6.71728	6.23641	5.60359	6.91023
ACPT	5.75172	5.74804	5.74752	6.12791	5.75757	5.73204	6.29146	5.87557	6.0691	5.76907	5.60974	6.69718	5.28122	5.80769	5.83211	6.10469	5.61888	5.58563	6.4335	5.71341	5.84005	5.60786	5.69991	5.80233	5.78685	5.77385	5.97684	6.08263	5.94945	5.45267	5.93195	6.23855	5.5636	6.0501	5.41272	6.00802	6.10398	5.45606	6.04705	6.11749	5.53326	6.16191	6.4931	5.9073	6.13356	5.82315	6.2741	5.81511	5.56673
ACR	3.84725	3.57479	3.67996	3.85326	3.56091	3.64063	3.65064	3.67284	3.64842	3.60177	3.93583	3.86308	3.98013	3.91722	3.48111	3.7616	3.97659	3.69023	3.90925	3.78778	3.91751	4.16681	3.57495	3.90494	3.96344	3.97712	4.1129	3.71664	3.78769	4.14834	3.60531	3.82805	3.55081	3.93269	3.97539	4.05282	4.91279	3.98428	3.98515	3.10012	3.63755	3.83949	3.90272	3.74244	3.85391	3.7117	4.12655	3.92665	3.99162
ACRBP	9.4285	9.89133	9.5486	9.27952	10.4658	10.0345	9.32185	10.076	8.72846	9.75032	8.79077	9.84626	9.30009	10.198	10.047	8.20445	9.89898	9.69724	8.75056	8.90783	8.52554	9.40461	10.6363	9.82473	9.69653	9.87903	10.1933	9.18109	10.1815	8.41234	9.08069	9.09322	8.40706	9.11849	8.68919	10.1155	10.5744	9.92765	10.4432	9.0332	8.90168	8.86545	8.05764	9.23675	9.56606	7.44299	10.6041	10.3139	10.8451
ACRC	6.82556	7.21189	6.87538	6.49174	5.5874	6.72258	5.83003	6.70167	6.68323	6.78716	6.87123	5.75243	6.55728	6.76994	6.99044	6.239	6.17331	6.02891	5.9314	6.90023	7.1537	6.22746	6.58865	6.69597	6.34622	6.65474	6.29699	6.44045	6.77803	5.58611	6.64031	5.71024	6.29591	6.39074	6.14208	6.68795	6.21782	6.08849	6.22517	6.5527	6.75283	6.58361	6.55195	6.65008	5.96141	5.90058	5.53847	6.93136	7.05344
ACRV1	2.88711	2.8238	2.82346	3.20772	3.06093	2.7668	3.11546	3.2779	3.27371	2.88985	2.74221	3.28552	2.92799	3.12059	2.99945	3.05355	2.70456	3.40975	3.62166	3.0799	3.12087	2.8928	2.91245	2.94143	2.75033	2.92312	2.87441	2.95247	3.06815	2.97857	3.00096	3.1854	2.87001	2.99139	2.64256	3.32754	3.2046	3.00727	3.24562	3.13259	2.78373	3.13945	3.44037	3.13664	2.95465	2.89623	3.15973	2.97253	2.78597
ACSBG1	5.03314	5.41033	4.48253	5.11562	5.36024	5.1754	4.7723	4.93193	4.49714	4.94773	4.17316	5.06346	5.20031	4.98121	5.22375	3.92035	5.36174	4.61904	4.55058	4.12629	4.58376	4.79656	5.163	5.1468	5.42292	5.26679	5.36228	4.77318	5.55293	4.90304	4.32981	5.09921	4.03318	4.73723	4.43547	5.24072	5.83597	5.38279	5.27319	5.02606	4.7284	4.05309	4.76504	5.2203	5.32643	4.19022	5.10586	5.11336	6.45653
ACSBG2	2.42919	2.70286	3.0631	2.57944	3.14334	2.987	2.91791	2.77287	2.76027	2.6944	2.73496	2.75877	2.78363	2.85335	2.90234	2.64891	3.29564	2.67851	2.98001	2.88371	2.96606	3.45249	3.2589	2.89739	2.78204	2.4827	2.70686	2.75768	2.771	2.99298	2.83315	3.196	2.96827	2.76503	2.86676	3.19392	2.7501	2.74442	2.85735	2.90182	3.24609	2.97314	3.37195	3.0179	2.85735	2.67676	3.02321	2.58199	3.38145
ACSF2	6.27041	6.5353	6.35733	6.26803	6.1324	6.54893	6.4721	6.18204	5.86491	6.31769	8.44812	6.60765	7.10848	6.65127	6.96249	6.2172	5.79382	6.57331	6.39261	7.12083	6.19045	6.88127	6.92979	6.63746	6.48332	6.88065	6.53752	6.45967	6.20141	6.16421	6.58428	6.13036	6.98442	6.12535	6.56307	6.06485	6.36153	6.71143	6.064	5.9521	6.83756	5.83381	6.0438	7.17909	5.61002	6.48605	6.40129	6.43525	6.52899
ACSF3	6.22549	6.0793	6.00699	5.93376	5.50317	6.14156	6.5225	5.86004	6.00547	6.15032	6.27448	5.65226	5.99453	6.19311	6.22532	5.82679	5.96692	6.32144	5.8672	6.1138	6.10026	6.16042	6.15847	6.29268	6.25964	6.06904	6.13576	6.08298	6.23569	5.85943	5.86666	5.84009	6.33175	6.04562	6.11365	5.9934	6.17331	6.2905	6.10634	6.08408	6.31976	6.15606	5.95185	6.05512	5.55519	5.66176	5.93635	6.02393	6.02451
ACSL1	11.2148	11.4383	11.9377	12.5705	12.0688	11.772	12.3284	11.9719	12.4154	11.7049	11.6456	11.9248	10.2817	11.9854	12.1837	11.2241	11.8872	11.8163	11.4804	11.4751	12.2017	11.7837	11.7335	12.2082	12.2627	12.262	12.3359	12.2936	12.4373	11.3959	11.3137	11.9778	10.4032	11.7133	9.62444	12.2553	12.0402	12.0456	12.0717	11.7755	11.8751	12.4586	11.6238	12.1893	12.4226	11.9276	12.0588	11.8436	11.9027
ACSL3	8.22089	8.318	8.32463	8.96086	8.97879	8.30804	8.64175	8.59128	8.73781	8.64307	8.31324	8.70996	8.02847	8.74201	8.67023	8.71753	8.45234	9.54594	8.67619	8.51249	8.71624	8.76455	8.63029	8.89667	8.79436	8.56222	8.59363	9.18947	9.02328	8.68664	8.63045	8.80205	8.5766	8.16409	8.67654	9.12366	8.99615	9.11571	8.95392	8.48074	8.36078	9.18499	8.39472	9.16339	9.27707	9.06483	8.76303	8.79478	8.22809
ACSL4	6.68632	6.98348	7.28961	7.85191	7.01125	7.43881	7.59954	6.32834	7.9387	6.52179	7.15871	7.08842	5.53197	7.74456	7.74454	6.17426	6.4301	6.00908	7.53744	7.04887	7.5919	7.6908	6.95706	8.09472	7.46876	7.90229	7.43058	7.62385	7.33275	5.44138	6.72272	7.48609	6.54844	6.68514	4.73367	6.76813	7.1268	6.91357	7.69281	7.16102	7.18474	7.48797	6.07644	7.66226	8.21445	7.0797	6.40827	7.30212	6.32373
ACSL5	9.80374	9.67029	9.44069	9.16718	9.22263	9.69992	9.45991	9.6883	8.81999	9.43242	9.69922	9.38863	9.92581	9.54001	9.40639	9.57743	9.5329	9.3362	9.42263	9.75424	9.5917	9.61947	9.68533	9.43754	9.71869	9.56621	9.41944	9.28626	9.70509	9.8052	9.97356	9.28617	9.98706	9.45579	9.87489	9.06034	9.4718	9.35037	9.90341	9.7166	9.92141	9.57331	9.85446	9.65747	8.79271	9.41914	9.50263	10.0137	9.51604
ACSL6	4.51466	5.11158	5.25676	4.18437	4.77704	4.73893	5.00151	4.78272	4.83784	4.78632	4.89645	5.02002	5.76568	4.62599	4.66225	4.83753	4.8021	5.05525	4.48639	4.84551	4.71099	4.62451	5.20388	5.01157	4.93469	4.66232	4.80925	4.4039	4.90253	4.85918	4.73893	4.59379	4.99689	4.63455	5.37812	4.69872	4.72675	4.39242	4.66831	4.54552	4.69394	4.21049	4.78656	4.48198	4.6017	4.40648	4.67084	4.79297	4.94354
ACSM1	3.96276	3.35705	3.44297	3.18927	3.13347	3.48914	3.69029	3.3566	3.42883	3.04102	3.50963	3.26201	3.80629	3.42778	3.41101	3.55091	3.61718	3.62851	3.04522	3.36369	3.45301	3.39966	3.45751	3.46263	3.68845	3.51532	3.39249	3.38793	3.61517	3.48339	3.31349	3.44598	3.36335	3.21272	3.6131	3.4864	3.5585	3.68497	3.5561	3.23337	3.61545	3.43992	3.57338	3.65122	3.2252	3.55353	3.37048	3.29663	3.45784
ACSM2A	4.08288	3.86732	3.278	6.12312	6.21565	3.42531	5.67009	5.10022	6.32029	6.28137	2.56672	5.28413	2.13187	3.07921	3.92575	5.16016	3.58286	6.08155	6.37446	4.36588	4.91425	4.42479	3.77631	3.52468	4.35602	3.96195	3.84382	4.18096	4.81305	2.43467	5.46347	6.19722	2.28531	5.20289	2.34074	4.97419	4.96758	4.86439	5.55691	5.09366	3.59904	3.94907	6.23935	4.58532	5.99496	5.85422	5.32991	4.88687	4.39114
ACSM2A /// ACSM2B	3.3474	2.89785	2.8982	2.88624	3.35807	2.81447	3.85346	3.21833	3.00771	3.23766	2.82952	3.75607	3.11748	2.73149	3.01458	3.53261	3.1622	3.74799	3.20581	2.77305	3.08121	3.17807	2.65383	2.81577	3.25713	3.13636	3.195	3.03207	3.11423	3.12586	2.98756	3.58433	2.9084	3.56581	2.84134	3.5236	3.31853	2.91113	3.59705	3.19202	2.84891	3.05981	3.31036	2.89392	3.80213	3.22707	3.50201	3.31569	3.03385
ACSM2B	2.09681	1.92991	2.06525	1.8919	2.17016	2.0841	2.10638	2.19732	2.05541	2.15001	2.07385	2.26739	2.21599	2.27818	2.27145	2.06913	2.09681	2.38937	2.74409	1.78945	2.09545	2.07336	2.30535	2.1005	2.14143	1.97408	2.02305	2.20228	2.3077	2.21011	1.87333	2.52069	1.89539	2.4703	2.08894	2.108	1.99674	2.48703	2.31786	2.477	2.37602	2.04404	2.58316	2.24042	2.29586	2.1328	2.1764	2.37725	2.17581
ACSM3	5.73639	4.78578	5.46141	4.30122	4.6596	5.17779	4.98731	4.57725	4.1547	5.20787	7.02377	4.93239	6.3929	5.1657	5.81417	4.80832	4.88211	4.18563	5.04277	5.10761	4.85484	4.80431	5.74981	4.24953	4.52241	5.07125	5.01215	4.7477	4.17281	5.30598	4.98531	5.16481	5.11118	4.74242	5.92628	4.50751	4.03416	4.46978	5.15927	5.09856	5.37833	4.04159	4.9287	5.22537	4.37616	4.00587	4.23971	4.8968	4.80759
ACSM5	4.69565	4.52072	4.61383	6.15662	6.14827	4.5104	6.65567	6.25031	6.12487	4.75895	4.16259	6.6693	3.39364	4.4132	4.74413	5.55958	5.28547	5.13725	6.15149	5.893	5.73373	4.83738	3.91592	4.49541	4.87528	4.73767	4.20766	5.04039	6.50535	3.70648	4.99408	7.67627	3.92091	6.21281	3.77246	5.80423	5.83573	4.76315	5.95413	5.80142	4.01283	5.05253	7.40274	4.80072	6.30799	5.37913	6.83505	5.55093	5.26021
ACSS1	4.88417	4.87598	4.54119	4.39434	4.42967	4.72118	4.05064	4.65703	4.2663	4.43899	4.66392	4.08385	4.28354	4.89064	4.79209	4.87241	4.27246	4.99289	4.4703	4.61157	4.46523	4.74927	4.25435	4.52253	4.55928	4.61974	4.65212	4.89694	5.17001	4.54672	4.7587	4.523	4.63602	4.72191	4.79732	4.52892	4.95669	4.93568	4.28308	4.30596	4.70389	4.58901	5.08096	4.74654	4.31076	4.30554	5.31907	5.13988	4.43824
ACSS2	7.64941	7.73619	7.90199	8.30609	7.8309	8.18321	7.88084	8.0701	7.77052	7.67047	8.23745	7.49723	8.21155	8.2188	8.44692	7.5062	8.12436	8.15555	7.32705	7.83898	8.20019	8.05719	7.63213	8.39269	8.37093	8.31974	8.32073	8.05598	8.17171	8.19321	7.56168	7.3948	7.80738	7.94773	8.13759	8.16033	8.2086	8.07202	7.71809	7.54182	8.17483	8.07982	7.44029	8.10977	7.69044	8.19543	7.57996	7.25966	7.93072
ACSS3	2.56246	2.39222	2.45993	2.81219	2.74609	2.66796	3.13591	2.77126	3.08345	2.75493	2.49807	3.47162	2.43608	2.99211	2.7479	2.55147	2.31905	2.68793	4.07554	2.50375	2.91119	2.89155	2.35596	2.68709	2.48642	2.44509	2.56471	2.43675	2.66773	2.56989	3.15987	3.23253	2.16546	2.44066	2.52037	3.04672	3.16785	3.44183	2.83695	2.91013	2.79787	2.76532	2.64786	2.69003	3.94317	3.40592	2.9192	2.73637	2.57182
ACTA1	3.08776	2.77769	3.01372	3.18499	3.06754	3.58438	2.80825	2.95013	2.89483	3.17967	3.45902	2.46546	3.58848	2.81974	2.92456	2.7395	2.83384	2.80316	2.75032	3.02657	3.24861	3.43915	2.82784	2.84573	3.10256	3.28469	3.56116	3.06723	3.10611	3.18019	2.76153	3.09227	3.04292	2.98111	3.12045	2.69264	3.48395	3.50259	2.73554	2.87647	2.92472	3.01638	2.54972	3.26564	2.80893	3.28122	2.42191	2.75279	3.307
ACTA2	5.34464	4.96862	5.55572	6.45138	6.2122	6.10816	6.71766	5.88029	5.34166	5.369	5.43372	6.241	5.64091	5.50118	5.66017	5.15322	5.33704	6.02224	5.98545	5.62613	6.41524	5.57478	5.69724	5.00892	5.23973	5.23088	5.27796	5.61702	6.62298	5.5375	5.7357	6.39487	5.86435	5.35998	5.32298	5.98726	5.71545	5.71882	6.72875	6.19383	5.01166	5.87997	5.54904	5.29447	6.56786	5.9738	6.058	6.80387	5.52258
ACTA2 /// ACTA2	4.54552	4.33325	4.5249	4.67867	4.0061	4.29005	4.23344	3.98067	4.16019	4.01547	4.10395	4.72852	3.78723	4.41178	4.6201	4.08736	4.36864	4.0646	4.66167	3.85115	4.2008	4.05343	4.52187	4.06334	4.11203	4.34948	4.0453	4.62555	4.83398	3.65519	4.60099	4.53137	4.35317	4.05575	3.68204	4.21464	4.57508	3.88367	4.55904	4.4292	4.4418	4.05011	3.88911	3.99716	4.17654	3.44995	4.07516	5.07015	4.24237
ACTA2-AS1	5.62574	5.55449	5.87342	6.57245	5.91864	6.19144	5.74701	5.86826	5.62271	5.28874	5.80066	5.59734	6.07408	6.11389	6.41383	4.94255	5.87747	5.72269	5.97623	5.68234	5.82369	6.05081	6.40881	5.82228	5.88369	5.74102	6.01892	5.98781	6.31612	5.80096	6.14732	6.197	6.27145	5.11011	6.06668	6.2242	6.10104	6.04341	6.12587	4.98081	5.71051	6.04693	5.17611	5.79826	6.4458	5.98	5.36789	5.99283	6.38438
ACTB	13.4879	13.6371	13.6117	13.7625	13.832	13.6371	13.8683	13.7265	13.9	13.7563	13.663	13.8825	13.5304	13.6181	13.6584	13.7555	13.6191	13.8194	13.8489	13.6553	13.6765	13.6879	13.5353	13.6357	13.6383	13.6634	13.7257	13.7813	13.7807	13.5877	13.747	13.898	13.58	13.7442	13.4567	13.7338	13.6891	13.6975	13.853	13.7439	13.5679	13.6761	13.745	13.7521	13.852	13.8005	13.8358	13.67	13.6194
ACTB /// ACTG1	12.7239	12.5833	12.7195	12.8038	12.7644	12.6389	12.5415	12.6944	12.6385	12.758	12.8472	12.8048	12.8792	12.6999	12.7051	12.7186	12.8339	12.722	12.4625	12.6654	12.6816	12.676	12.6086	12.583	12.9359	12.7779	12.8907	12.7633	12.772	12.8744	12.5369	12.6321	12.8301	12.8064	12.6645	12.74	13.0355	12.9418	12.5725	12.7384	12.6103	12.8204	12.8342	12.6667	12.5726	12.7025	12.8429	12.8562	12.7625
ACTBP9 /// ACTBP9	6.8936	6.97407	7.03415	7.42257	7.0898	6.96659	7.43612	7.19384	7.15851	7.07739	7.32784	7.47186	7.29444	7.37671	7.13853	7.40091	7.10895	7.225	7.00899	7.03261	6.99534	7.19753	6.99762	7.1172	7.08533	7.25229	7.79447	7.22916	7.24912	7.62599	6.98996	7.09722	6.98907	6.97436	6.83361	7.23158	7.43666	7.57769	7.40521	7.33245	6.99515	7.31081	6.93351	7.30959	7.43621	7.40417	7.14372	7.11514	7.35097
ACTC1	2.97061	2.90735	2.69565	3.66717	3.44393	2.98121	3.55666	3.10711	2.70872	3.0444	3.14511	3.39999	3.1425	3.01833	3.00653	2.96309	3.21328	2.60487	3.78741	2.8678	2.78469	2.58783	2.88975	3.04669	3.17761	3.16649	3.12904	3.42496	3.15183	3.02944	2.75645	3.26624	3.06238	3.0487	3.10799	3.0227	3.27475	3.56487	3.1793	3.02944	2.99759	3.32771	3.14893	2.84044	3.25371	3.36913	3.06763	2.87989	3.29838
ACTG1P4 /// AMY1A /// AMY1B /// AMY1C /// AMY2A /// AMY2B	9.40108	9.56362	8.96304	8.91285	9.07209	8.9285	9.59645	9.0677	9.5735	8.98424	8.82105	9.315	7.52069	9.23928	9.60371	8.75512	8.79655	8.81896	9.19145	9.04959	8.66614	8.90201	8.87299	8.83344	8.72185	9.02516	8.69623	8.71911	9.33984	7.33651	8.57336	9.14507	6.91999	8.97407	6.5749	8.60099	8.68671	8.16317	9.08791	8.90834	9.14916	9.2019	9.15075	9.19081	9.61252	9.12204	8.96031	8.68068	8.34402
ACTG1P4 /// AMY2B /// RNPC3	7.99446	8.30559	8.56623	7.8793	7.76818	8.2916	7.92383	7.98098	8.38338	8.32571	8.40926	8.04954	6.43159	8.19183	8.57923	8.24011	8.10495	7.8208	8.15631	8.1448	7.9261	8.15637	8.16754	8.16126	8.0173	8.15087	8.01829	8.24709	8.1499	6.14259	7.70337	7.78456	6.96742	8.05815	5.78493	7.72541	7.9721	7.60239	7.93445	8.23896	8.23153	8.19996	7.68984	8.35672	8.26804	7.86904	7.57822	7.83723	7.70289
ACTG2	4.12438	3.29882	3.39413	3.74714	3.89533	3.6297	3.7138	3.67549	3.82781	3.37887	3.96802	3.75528	3.70123	3.8488	3.98739	3.63617	3.61118	4.01645	3.7351	3.89121	3.72742	3.62489	3.65578	3.75734	3.57511	3.73169	3.81815	3.94814	3.62784	3.97994	3.63763	4.01492	4.07275	3.51645	3.71211	3.7264	3.84615	3.97352	3.7177	3.75277	3.43431	3.92522	3.26301	3.8372	3.63046	3.52281	3.57997	3.76663	3.90046
ACTL10	5.99531	5.83162	5.88904	5.68249	5.38331	5.72127	5.66213	6.23172	5.93516	5.8873	5.94492	5.93309	6.19652	5.94106	5.92183	5.91366	5.73921	5.96811	5.60408	5.62803	5.85538	5.76787	5.93285	5.84516	5.77056	6.08364	6.01132	6.06523	5.95104	5.67518	5.79971	5.95266	5.88369	6.28199	6.15464	6.3407	5.90398	6.00445	5.69006	5.56335	5.77513	5.95791	6.10419	5.95528	5.67824	5.5785	6.05568	5.97861	5.8289
ACTL6A	6.4016	6.79025	6.92442	5.75397	5.18872	6.52305	5.34155	6.47575	5.71671	6.62154	7.02988	5.24485	7.49996	6.2676	6.08088	6.49576	6.81902	5.48596	5.41667	6.7658	6.4215	6.17147	6.71401	6.22987	6.54569	6.6208	6.07976	6.21036	6.41929	7.18218	6.68808	5.01472	7.5043	6.24076	7.3745	6.07385	6.14235	6.00153	5.31594	5.99944	6.52664	6.15815	5.63658	6.2596	5.18863	5.71296	6.02972	6.52322	6.78546
ACTL6B	4.03769	3.9034	3.96123	4.08464	3.88011	3.83876	4.07802	4.1292	4.21305	3.7818	4.21725	4.24393	4.11887	3.94296	4.16014	3.97991	3.83665	3.84531	3.4079	3.90631	3.96617	4.17078	3.68363	3.91547	4.04361	4.42105	4.52153	4.00559	3.99914	4.03287	3.88336	4.02062	4.02954	4.13922	4.07515	3.93302	4.3053	4.385	3.80209	3.80404	3.71386	4.06942	3.79705	3.7215	3.99393	3.96852	3.95024	3.5794	3.79708
ACTL7A	2.69788	3.00002	2.73499	2.67973	2.66009	2.82073	3.06415	2.75785	2.90586	2.88819	2.88392	2.92782	3.20291	3.13272	3.17082	2.59925	2.9444	3.0634	3.06616	2.80699	2.67931	2.88392	2.85084	2.97192	2.88392	3.24109	3.51661	3.14955	3.09206	2.96712	2.61767	2.96723	3.27974	2.50057	3.14465	2.68661	2.9434	2.88392	2.66325	2.78173	3.08555	2.999	2.88653	3.11723	2.65231	2.49908	2.93101	2.61404	2.69805
ACTL7B	5.603	5.40632	5.19028	4.98866	5.29625	5.3055	5.26372	5.30229	5.36423	5.15984	5.17605	5.42147	5.79961	5.69264	5.71452	5.25691	5.05458	4.95387	5.11496	5.17285	5.4257	5.21846	5.54471	5.22662	5.42561	5.45388	5.65573	5.57183	5.63708	5.35181	5.0796	5.41506	5.37273	5.46021	5.46898	5.54081	5.56479	5.32831	5.14363	5.39431	5.22131	5.7107	5.25066	5.49687	5.2762	5.20639	5.22212	5.32868	5.42102
ACTL8	3.62095	3.76234	3.75866	4.18815	4.27837	3.8349	3.98737	4.00231	4.20936	3.7757	3.54181	4.12263	3.86835	3.50126	3.58188	4.15438	3.69637	3.99115	4.03722	3.7088	4.2628	3.89993	3.63785	3.7529	3.96871	4.08066	3.59866	4.06688	4.12006	3.83248	3.98399	4.27223	3.61259	3.61434	3.96682	4.29516	4.41349	3.71011	4.32196	4.06375	3.3373	4.01496	3.99879	3.89407	4.01247	4.14815	4.29025	4.15778	3.58588
ACTL9	3.1352	3.47236	2.94555	2.73995	3.17724	2.97364	3.2811	2.78699	2.83943	2.9953	2.94769	3.45667	2.78685	3.02186	3.1905	2.45523	2.83224	3.70808	3.01152	2.94344	3.28052	3.34365	3.09994	2.82354	3.07213	3.01024	3.09123	3.074	2.94651	3.44224	3.0328	2.79879	3.12888	3.06773	3.1676	2.96155	3.00044	3.50357	2.81771	2.86077	3.03908	3.24013	2.9249	3.00953	3.11185	2.68897	2.87937	2.82658	3.10079
ACTN1	9.56852	9.44859	9.51914	10.3862	9.74964	9.50086	9.80213	9.86934	9.7116	9.52837	9.70976	9.56378	8.46365	10.2177	10.1728	8.7888	10.2854	9.92432	9.10589	9.39526	9.6141	9.91554	9.80951	10.0637	10.191	10.0579	10.2616	10.1065	10.0422	9.2507	9.01404	9.36513	8.09019	9.46598	8.58351	9.95922	10.2904	10.193	9.73366	9.4478	9.56994	10.2785	9.58831	10.1304	10.0771	9.78557	9.89755	9.15317	10.1186
ACTN2	2.4495	2.4991	2.59492	3.16738	2.88248	2.71505	2.87836	2.88352	2.81143	2.74124	2.66237	3.05355	2.50745	2.46192	2.79954	2.80187	2.78918	3.09759	3.01573	2.6668	2.8469	2.81614	2.75396	2.8867	2.57599	2.64831	2.69837	2.85347	2.99458	2.71653	2.58704	3.04272	2.36819	3.10954	2.59752	3.15959	2.89895	2.80985	3.10847	2.87787	2.67946	2.60084	2.86449	2.8072	2.87946	2.9423	2.92646	2.77562	2.71449
ACTN3	3.37121	4.13697	3.74452	3.8753	3.70946	3.99156	3.7046	3.74303	3.33525	3.61385	3.97118	3.75983	3.57176	3.86169	4.08635	3.44292	3.99779	4.18767	3.32369	3.58404	3.72969	3.92709	3.76369	4.00824	4.0942	4.05805	4.3953	4.29405	3.55479	3.91297	3.42311	3.86652	3.67963	4.03216	3.71285	3.8986	3.64774	4.34638	3.76835	3.44213	3.81315	4.01173	3.56474	3.80714	3.47633	3.94245	4.02187	3.5671	3.64126
ACTN4	9.09229	9.07687	9.48671	9.33891	9.06004	9.28693	9.02977	9.24343	8.88596	8.93717	9.53478	8.68351	9.04467	9.47937	9.6997	8.87631	9.41281	9.25006	8.71121	9.43324	9.25006	9.50035	9.35747	9.32155	9.61465	9.5476	9.62245	9.53734	9.48238	9.57708	9.20475	8.79605	9.31863	9.35995	9.20011	9.41002	9.62337	9.58669	8.91736	9.0706	9.61869	9.60539	9.44891	9.54869	8.92158	9.38606	9.3851	9.02741	9.42261
ACTR10	9.83456	9.69412	9.85946	10.3298	9.75777	9.69251	9.80453	10.0064	9.63085	9.66848	9.92225	9.70311	10.4486	9.86224	9.94419	9.61143	9.77947	9.65685	9.58738	9.93074	9.87507	9.76053	9.92727	9.75243	10.144	9.94943	10.0007	9.83337	9.94521	9.99283	9.67508	9.48834	9.66677	9.80217	9.86434	10.0123	9.99151	10.0772	9.65385	9.49225	9.82341	9.84645	9.80832	9.92867	9.77956	9.70557	9.99357	9.83631	9.85668
ACTR1A	9.47438	9.39554	9.74733	10.2697	9.25428	9.83874	9.40452	9.77321	9.37204	9.75737	10.1014	9.3848	10.3584	9.8271	9.8485	9.39108	9.72231	9.63069	9.12058	9.75286	9.89564	9.92449	9.72408	9.96059	10.0908	10.1275	10.0921	9.76089	9.68475	10.207	9.68083	9.2441	10.1437	9.52121	10.31	9.7448	9.80549	10.063	9.55123	9.64447	9.91369	9.82408	9.5239	9.75052	9.4668	9.73167	9.52392	9.56157	9.98749
ACTR1B	7.6235	7.6956	7.77753	7.30505	6.93888	7.1332	7.15332	7.31036	7.06019	7.54856	7.72973	6.6724	7.69759	7.28353	7.40058	7.58751	7.37263	7.58563	7.03606	7.80061	7.5583	7.31207	7.33491	7.44271	7.37123	7.47086	7.25043	6.79208	7.27997	7.73249	7.59347	7.08627	7.76926	7.46398	7.62576	7.51686	7.21375	7.37662	6.9483	7.32163	7.86236	6.69749	7.65957	7.484	6.83812	7.09383	7.28578	6.98616	7.58065
ACTR2	9.38004	9.20793	9.86741	10.0528	9.26599	9.33643	9.34125	9.50855	9.37524	9.48774	9.74306	9.15074	9.65663	9.64965	9.61417	9.28748	9.56051	9.32977	9.13423	9.71588	9.87496	9.82146	9.46185	9.84641	10.032	9.97879	10.1136	9.63445	9.4696	10.0436	9.35742	9.52339	9.76324	9.45098	9.90756	9.41397	9.66556	10.0321	9.22193	9.59464	9.69666	9.70024	9.3905	9.56169	9.65404	9.67338	9.38727	9.28914	9.67513
ACTR3	11.6463	11.8396	12.0238	11.9801	12.0137	11.8759	12.0245	11.9976	12.0374	11.9439	12.1824	12.0345	11.8352	11.8221	11.8792	11.9537	11.8133	12.0025	11.8757	11.8406	11.9314	11.8876	11.8047	11.7968	11.8423	11.9588	11.969	12.0099	12.1308	11.9228	11.9653	12.0894	11.8428	11.9585	11.7958	12.1169	11.9639	11.8473	11.9619	11.8867	11.7339	11.812	11.8843	12.0561	12.0238	11.9091	12.1345	11.8803	12.0142
ACTR3B	6.82098	6.89729	6.60613	6.2095	6.63884	6.92378	5.64614	6.8251	5.93811	6.60715	6.96635	6.13766	6.71935	6.82341	6.63025	6.226	6.89215	6.29369	5.68245	6.24386	6.2134	6.6523	7.07864	6.6917	7.00868	6.87291	6.72018	6.42287	6.69048	7.02532	6.46188	5.84084	6.53031	6.13241	7.0777	6.71181	6.90483	6.5408	6.45216	6.24951	6.87866	6.12755	5.83835	6.38489	5.98495	6.18109	6.63495	6.47971	7.12454
ACTR3BP2	5.32628	5.29746	4.20668	7.50741	8.76263	4.22099	7.31504	7.65146	8.71402	7.23004	3.9632	7.65906	3.52141	4.56005	4.72394	6.63485	5.28284	8.30874	8.07817	6.01448	5.92409	5.84309	4.22618	5.06353	5.93942	5.07452	4.70928	5.58144	6.44942	3.77188	6.41976	8.39781	3.81726	6.99775	3.62391	6.88733	6.21783	6.79009	7.83078	7.63639	4.08125	5.19467	8.6091	6.35206	7.70513	7.63388	7.48165	6.45676	5.12807
ACTR3BP2 /// ACTR3BP5	4.83455	5.29213	4.04813	7.11794	8.37734	4.28191	7.37665	7.41775	8.4906	7.07111	3.40472	7.40565	3.26654	3.49208	4.25899	6.53618	5.0811	7.64555	7.55537	5.77696	6.03676	5.54051	3.99906	4.47126	5.65042	4.74955	4.94255	5.72344	6.41925	3.29597	6.28212	8.02408	2.87616	6.91329	3.7755	6.28132	5.88204	6.72637	7.69145	6.96128	4.15567	4.83049	8.43543	6.29671	7.85735	7.518	6.99768	5.98298	5.26732
ACTR3C	4.26815	4.60566	4.75596	4.54384	4.11057	5.01152	4.20291	4.61374	4.3812	4.28631	4.89645	3.71158	4.4058	4.84997	4.95351	4.07413	5.08594	3.96762	3.44457	4.96705	4.14773	5.40915	4.74796	4.76451	4.30571	5.11253	5.1957	4.99924	4.60397	5.45473	4.24501	4.40949	4.68203	3.96651	5.00349	4.42257	4.72656	5.1191	4.18087	4.67678	5.14895	4.73988	4.73726	4.9597	4.37409	4.19269	4.06154	4.77827	4.76706
ACTR3P2 /// ACTR3P2	3.01292	2.93246	3.20901	3.06001	3.06655	3.13309	3.1137	2.92044	2.97186	3.11882	2.93885	3.12456	3.27155	2.97079	3.11564	3.18671	3.3704	2.93415	2.71332	2.7566	3.28767	3.48504	3.11524	2.63114	2.92721	3.2795	3.02073	3.48388	3.00915	3.03375	2.78147	3.09595	3.04093	2.77522	3.02379	2.96829	2.75009	4.14241	3.21986	3.03073	2.91966	2.999	2.84536	2.86287	3.11332	2.82848	3.24701	3.92567	3.37912
ACTR5	7.15886	7.38351	7.18238	6.35583	6.4619	7.09091	6.44859	6.48379	6.68504	7.04077	7.14524	6.35311	7.09534	6.66464	6.87885	6.9135	7.01039	6.90416	6.67115	7.26487	6.87856	6.47447	6.8296	6.9302	6.615	6.87326	6.55972	6.72139	6.16423	6.8717	6.8376	6.90701	7.17745	6.67352	7.26216	6.56245	6.43811	6.62409	6.59246	6.89018	7.53715	6.66984	6.97773	6.5904	5.91212	6.48238	6.46966	7.02162	6.8877
ACTR6	6.63855	6.57117	6.54791	6.17112	6.16796	6.20144	6.10385	6.30728	6.14942	6.44414	6.35841	6.43712	6.61029	6.19776	5.95037	6.48326	6.12613	6.56674	6.54634	6.27632	6.2778	5.99604	6.48316	6.17184	6.27829	6.13877	6.19281	6.66216	6.41251	6.49681	6.52923	6.09582	6.60427	6.35902	6.51776	6.30054	6.09636	6.38612	6.70824	6.46472	6.33556	6.21411	6.4272	6.23222	5.86117	6.32915	5.95845	6.49291	6.36773
ACTR8	6.694	6.59448	6.46172	6.13537	5.64368	6.56435	5.70543	6.51756	5.79185	6.42762	6.86883	6.02398	7.01961	6.2445	6.08793	6.23694	6.60011	6.29029	6.16758	6.69779	6.6971	6.36357	6.60752	6.63173	6.41216	6.50216	6.34231	6.02867	6.02675	7.12787	6.7813	5.53952	7.18346	6.12263	7.26224	6.05152	5.88948	6.54204	5.72797	6.32867	6.88661	6.30248	6.16582	6.24242	5.60903	6.37525	5.93698	6.2677	6.51143
ACTRT2	3.68772	3.48738	3.86186	3.14153	3.80664	3.71798	3.88718	3.50521	3.22773	3.36229	3.9317	3.8134	3.82483	3.92546	3.5175	3.65383	3.57556	3.50546	3.35657	3.85891	3.76448	3.32163	3.51914	3.41029	3.94152	3.22551	4.1193	3.15504	3.53164	3.68607	3.50939	3.46098	3.51251	3.5152	3.72748	3.86959	4.04855	3.35663	3.6546	3.26154	3.87448	4.13543	3.60686	3.80293	3.74433	3.98317	3.80935	3.18166	3.4266
ACTRT3	2.51931	2.30031	2.4619	2.63419	2.38827	2.63926	2.57239	1.88959	2.37839	2.54797	2.61962	2.59862	3.12952	2.5321	2.55367	2.53175	2.39184	2.41362	2.4552	2.52155	2.93504	1.98005	2.36218	2.71695	2.20804	2.68562	2.88695	2.22911	2.20696	2.46883	2.57131	2.75457	2.45897	2.11003	2.50329	2.27225	2.85176	2.19522	2.27446	2.22723	2.24697	2.53358	2.45653	2.59599	2.06819	2.26803	2.40078	3.4886	2.49892
ACVR1	7.68074	7.75506	7.47432	7.13463	7.33492	7.68145	6.77248	7.66781	6.55612	7.45564	7.26422	7.41481	8.19694	7.18238	7.35667	7.13743	7.54391	7.32989	6.36821	7.25288	7.20911	7.26862	7.78018	7.65677	7.60013	7.75608	7.58327	6.81016	7.28936	7.8639	7.23296	7.11258	7.81266	6.70371	8.01564	7.43663	7.50025	7.47422	7.36157	7.13616	7.26048	6.65199	7.01136	7.3208	7.13252	7.01292	6.9688	7.45271	8.28075
ACVR1B	3.8426	4.11904	4.60379	4.99076	3.84036	4.4251	3.9901	3.88543	4.08652	3.96123	4.97185	4.30999	4.86071	4.80335	4.47614	4.00678	4.74565	4.17002	3.87852	4.30856	3.99736	4.67126	4.18037	4.72028	4.32822	4.88399	4.97327	4.90367	4.14156	5.01424	4.30349	4.13453	4.80797	4.57362	4.65669	3.8988	4.02297	5.042	4.17511	3.86385	4.35158	5.27477	3.93478	4.35426	4.32627	4.11813	3.78819	4.04801	4.43896
ACVR1C	5.62699	5.98806	5.9359	4.68757	6.1204	4.84776	5.50751	4.57252	5.44032	5.74558	5.21506	5.63549	6.21169	4.23391	5.28512	5.61171	5.3321	6.3952	5.99569	4.46334	5.29247	4.69247	5.42637	3.94833	4.71483	4.23876	4.56936	3.84078	4.87634	5.53536	5.42076	6.16348	4.42052	4.46317	5.75972	3.84246	4.84286	5.25734	5.629	5.44557	5.30208	3.97448	4.87624	4.82974	5.71054	5.22908	3.99546	5.16483	5.14204
ACVR2A	8.35829	8.62302	8.39567	7.95185	8.59755	8.00933	7.97473	7.91005	8.68824	8.33041	8.00966	7.92563	8.30407	7.62704	7.66631	8.43263	7.92141	8.55005	8.27783	7.86958	7.93445	7.90724	7.53245	7.94616	8.1791	7.84711	7.57226	7.31269	7.48686	8.16312	8.36529	8.18791	7.87615	7.94351	8.2685	7.34047	7.30985	7.79993	7.79154	8.03972	8.08343	7.02649	7.66749	7.82199	7.95557	7.78766	7.33517	7.62693	7.98693
ACVR2B	4.22731	4.16809	4.50266	3.48347	3.74223	4.09988	3.91168	3.73866	4.18195	4.39492	4.12998	4.1556	4.46123	4.06571	3.90005	3.72518	4.45824	4.38838	3.57854	4.31554	4.00996	3.78925	4.06854	4.08343	4.36369	3.89776	4.52877	4.48464	4.15421	4.39832	4.14419	3.71074	4.27822	3.6826	4.09257	4.27934	4.46748	3.8769	3.63349	3.95505	4.36938	4.50865	4.46019	4.36999	3.48166	3.89066	4.42297	4.35447	4.36066
ACVR2B-AS1	6.03482	6.06415	6.09695	7.2025	7.47568	5.66379	7.84469	6.75123	7.16857	6.78884	6.03853	7.83377	5.0625	5.82613	6.16009	7.41665	6.15608	7.0848	7.86205	6.20225	6.72398	6.22516	5.63041	6.13678	6.07192	6.13316	6.04565	6.45301	6.75361	4.92249	6.19557	8.11504	5.46292	7.1741	4.38177	7.00701	6.56399	5.68597	7.77918	7.04209	5.88179	5.98655	7.79642	6.86796	7.98457	6.60735	7.91017	6.76653	6.20042
ACVRL1	4.36243	4.44016	4.7691	4.77963	4.70198	5.24123	4.73231	4.74722	4.76988	4.07434	4.46277	4.67511	5.39755	4.97898	4.90104	4.76288	4.5757	4.79605	4.30524	4.38734	4.52864	4.82484	4.6238	5.38675	4.77395	5.00769	4.6985	4.75678	4.74221	5.53596	4.89811	4.34725	5.49012	4.79162	5.34576	4.82287	5.39168	5.41334	4.13674	4.34549	4.60595	4.92696	4.2495	4.45304	4.1295	4.52546	4.58354	4.433	4.56649
ACY1	4.47131	3.82094	3.93031	4.23573	3.57665	3.67046	3.79861	4.05783	3.98585	3.94027	3.8974	4.12454	4.13758	4.47014	4.33241	4.40727	3.83107	4.06933	3.8616	4.05589	3.98888	3.71973	3.98739	3.77217	4.27022	4.42302	4.40876	4.2778	4.31869	4.23802	4.01415	4.39995	3.98468	4.5578	4.49833	4.32091	4.34009	4.7518	3.87711	4.18684	3.91353	4.76418	4.05326	4.04991	3.94977	3.56855	4.08414	3.80038	3.83403
ACY3	3.82431	3.40332	3.62285	3.50889	3.37481	3.7074	3.88099	3.5122	3.51486	3.50212	3.59836	3.3454	4.49353	3.71063	3.73142	3.67137	3.51129	3.34858	3.46432	3.56763	3.62644	3.70247	3.46607	3.76765	3.51551	3.73718	3.81757	3.49642	3.40575	3.77582	3.54314	3.54666	3.92794	3.33283	3.80102	3.64668	3.79835	3.70409	3.58353	3.35628	3.4773	3.68144	3.45478	3.56726	3.22396	3.65818	3.22125	3.39756	3.52979
ACYP1	9.3181	9.55658	9.04991	8.08239	8.39077	9.06366	8.1552	8.19403	8.38558	8.77026	9.05546	8.7773	8.833	8.40803	8.29132	9.16998	9.31944	8.55579	8.80963	9.27422	8.57065	8.36815	9.17236	8.66242	8.43918	8.53614	8.05556	8.66371	8.58641	8.93513	9.11657	8.54834	9.25162	8.91647	8.8133	7.9646	8.32104	8.31139	8.39166	8.84351	9.12427	8.58518	8.97093	8.26297	7.56134	8.63111	8.41547	9.07351	8.8671
ACYP2 /// LOC101927144	8.01542	8.09277	7.8286	7.32851	7.33512	8.06869	7.24173	7.84185	7.27681	8.03925	7.90743	7.60939	8.71198	7.77348	7.09346	7.75769	7.75354	7.54592	7.50377	7.5943	7.57088	7.64136	7.91632	8.01197	7.94653	7.62622	7.70229	7.8963	7.35398	8.65306	8.07543	7.43779	8.42811	7.50303	9.0399	7.80814	7.78548	8.20336	7.48206	7.78836	7.85915	7.54541	7.39291	7.23084	6.72223	7.81858	7.47526	8.10038	8.12168
ADA	7.9444	7.75647	6.39676	7.12555	6.31945	7.54286	6.9159	7.77554	6.1471	7.13614	7.633	7.34807	8.21218	6.96291	7.11646	7.6197	7.1097	7.09924	7.30408	8.22202	7.67754	6.58061	7.49826	7.54807	7.15197	6.99353	6.67692	7.32554	6.97834	7.23205	7.77294	6.56213	8.29039	7.64489	8.31957	7.23499	6.88564	6.62155	7.02119	7.15725	7.72485	7.46694	8.06666	6.88751	4.96682	6.50727	7.49174	7.9957	7.2325
ADAD1	3.69183	3.41049	3.38436	4.08612	3.83513	3.5135	3.88741	3.68596	4.26108	3.73746	3.20194	3.81419	3.49864	3.51065	3.17793	3.92421	3.21341	3.87546	4.6028	3.57356	3.29489	3.97614	3.37176	3.43636	3.27192	3.24352	3.3736	3.75902	3.77991	3.1892	3.48798	4.18649	3.20818	4.00097	3.42365	3.41935	3.29881	3.99319	3.98999	3.65565	3.44737	3.15187	3.87661	3.54503	3.62161	3.49809	4.35876	3.6702	3.54747
ADAD2	5.4235	5.28465	5.32599	5.72999	5.26571	5.32434	5.96382	5.55093	5.49153	5.52639	5.23123	5.71157	5.62664	5.48826	5.68765	5.53637	5.58045	5.354	5.23947	5.56348	5.72116	5.49325	5.47322	5.42956	5.72606	5.63168	5.88369	5.81294	5.60582	5.8479	5.85246	5.86152	5.64666	5.78697	5.89656	5.83021	5.73434	5.86424	5.31992	5.5149	5.72733	5.79924	5.64173	5.7774	5.74703	5.82313	5.96244	5.48013	5.71047
ADAL	3.60783	3.96328	4.1164	4.2528	4.03075	3.75428	3.80413	3.7352	3.9119	3.82431	4.70628	3.9518	3.90513	3.75388	3.97711	4.25824	3.63388	3.83503	4.5828	3.89361	3.76325	3.80188	3.84223	3.60277	3.1772	3.72427	3.60704	4.38813	3.69266	4.06485	3.89361	3.83255	3.75901	4.04591	3.6207	4.00593	3.61131	3.76114	4.38388	3.49394	3.54715	4.02839	3.99639	3.54342	4.11409	4.28718	4.08436	4.05952	3.90143
ADAM10	8.13862	8.34019	8.01891	8.56918	7.83718	8.50133	8.05919	8.29379	8.24278	8.21984	7.98717	7.64692	8.09971	8.24835	8.50981	7.85394	7.91358	7.82222	7.59165	7.94458	8.33811	8.47946	7.65018	8.38719	8.65651	8.56743	8.68596	8.23611	8.22365	8.59491	8.42723	7.82009	8.13492	8.05461	8.40994	8.28903	8.14915	8.64515	8.39878	8.26169	8.10164	8.38667	7.63856	8.1362	8.33942	8.66593	7.92424	7.69365	8.36433
ADAM11	3.84158	3.79416	3.60835	4.06407	4.12021	3.95973	4.13734	3.78042	3.97761	3.85208	3.92467	4.10698	3.73746	4.13218	4.13623	3.67139	3.96204	3.91351	3.9906	3.90637	3.98288	4.09609	3.93811	3.88101	3.9838	4.04432	4.2598	4.07118	3.70025	3.75429	3.88755	3.79208	3.91817	3.90535	3.84761	3.66191	4.05321	4.12797	3.98572	3.77725	4.02719	4.25744	3.95827	4.10257	3.96318	3.83153	4.01523	3.82665	4.04774
ADAM12	3.92466	3.58436	3.88646	3.31833	3.50172	3.22638	3.70791	4.49762	3.79519	3.26123	3.59379	3.7822	3.4981	3.44791	3.62168	3.61044	3.35791	3.60219	3.10999	3.21309	3.53025	3.05397	3.64539	3.65207	3.9843	3.6731	3.85469	3.31833	4.13065	3.59512	3.27999	3.69136	3.0983	4.19853	3.60903	3.72644	3.61255	3.37129	3.37105	2.90466	3.2818	3.37277	3.73211	3.594	3.66126	3.20538	3.70512	3.32227	3.51747
ADAM15	5.79651	5.76238	5.8148	6.06217	5.51084	5.88065	5.73816	5.79373	5.77499	5.59992	6.07658	5.74493	6.53984	5.97745	6.05093	5.57064	6.08176	5.78678	5.71087	5.76567	5.82053	5.90092	5.56469	5.9463	5.62272	5.88298	5.97323	5.84455	5.93978	6.40512	5.79465	5.66908	6.16955	5.53765	6.46048	5.97025	5.75276	5.88971	5.29228	5.75899	5.64145	5.82477	5.20453	5.779	5.54216	6.10712	5.79904	5.39314	5.83026
ADAM17	9.87598	9.9049	9.94809	10.4157	9.70235	10.0332	10.0502	9.96808	10.7158	10.0568	10.0612	10.0776	9.8876	9.99115	10.3029	10.0823	10.0205	9.95326	9.9514	10.0424	10.1322	10.3503	9.93972	10.1498	10.143	10.2431	10.5681	10.1325	10.1907	9.83825	9.91885	9.71061	10.117	10.1931	9.68434	10.0436	9.52442	9.68973	9.98958	9.84581	9.98192	10.587	9.55877	10.1087	10.4994	10.1519	10.4301	9.96492	9.75284
ADAM18	4.12164	3.63874	3.48806	4.26771	4.61048	2.87078	4.66221	4.05278	4.56632	4.50068	2.85145	4.42497	2.92889	2.88465	3.14999	4.05825	3.13503	4.36313	4.80875	4.00939	3.56387	3.76964	3.10662	3.59289	2.78133	3.76611	3.43885	3.23312	3.80215	2.82371	3.5869	4.8934	2.68938	4.0262	2.89114	4.31432	3.54524	4.14196	4.29106	4.4477	3.39688	2.95435	4.42292	3.84133	4.68489	4.33323	4.2775	3.92106	3.71096
ADAM19	7.60046	7.50439	7.90477	8.29689	8.16033	7.69979	7.84415	7.60773	7.84571	7.69078	7.99173	7.87468	7.33936	7.95338	7.96631	7.74772	7.4526	7.78411	7.79064	7.65165	7.46593	7.78859	7.67871	7.75628	8.07371	8.0337	8.23139	8.05828	7.64595	7.66156	7.62932	8.10773	7.77494	7.59506	7.35389	7.82712	8.20868	8.40259	7.88276	7.93795	7.34093	8.28036	7.76485	7.91127	8.28641	8.02711	7.79796	7.65916	7.65907
ADAM1A /// ADAM1A	6.30395	6.61143	6.51498	5.32334	5.37834	6.54152	5.55425	6.40376	6.43529	5.58378	6.32805	5.89839	6.49871	5.67694	6.20442	6.4612	6.48976	5.60959	4.87403	6.34679	6.18639	6.08304	6.51781	6.0217	6.32773	6.12946	5.40107	6.00829	6.19379	5.78319	6.27812	4.8919	5.91284	6.38459	6.21518	6.04917	5.58397	5.77522	5.64862	6.07321	7.02905	5.93016	5.92254	6.32493	5.12676	6.01567	5.34136	6.02854	6.28303
ADAM2	2.54068	2.2287	2.30331	2.34783	4.43349	2.10628	3.39994	2.92044	2.89483	2.95442	2.07764	4.19449	2.10982	2.24207	2.66142	2.80525	2.30694	3.47667	3.4396	2.67689	3.06192	2.66818	2.36349	2.25641	2.48368	2.90237	2.47222	2.33983	2.76404	2.0673	2.92901	3.42467	2.08371	3.17833	2.00505	2.80386	2.45001	3.17356	3.4407	3.65099	2.57563	2.24546	3.76472	2.62514	4.53396	2.85548	3.80127	2.45265	2.36292
ADAM20	3.85242	3.58758	3.6482	3.81858	4.40112	3.66881	5.24284	4.09349	3.99968	4.6608	3.40225	5.0027	3.73888	4.14899	4.09638	4.42499	3.46353	4.32476	5.96751	3.3913	4.64619	4.13586	3.90291	3.80049	3.37638	3.91652	3.47686	4.14699	4.15817	3.36862	4.56341	5.33009	3.40624	4.49915	3.50352	4.5938	3.87737	3.55862	5.14935	5.08726	3.50471	3.57759	4.51619	3.9686	5.93605	5.49306	4.55239	4.49967	3.58505
ADAM21	2.99839	2.94125	3.1358	3.60831	3.63126	2.96335	3.5181	2.90234	2.97294	3.04735	3.01792	3.4075	3.31966	3.03573	2.90342	3.06999	3.24334	3.34954	3.5863	2.96408	3.00011	3.01348	3.14315	3.13885	2.84529	3.23678	3.21531	2.90524	3.06911	3.07152	2.9034	2.84737	2.78899	3.2462	3.3226	3.11345	2.8337	3.17904	3.46624	3.34408	2.88994	3.04027	3.32421	2.92408	3.43396	3.14574	3.0196	3.36423	3.17207
ADAM22	3.53527	3.58529	3.51885	4.27125	4.21446	3.15337	3.79797	3.79691	4.41261	3.92429	3.31121	4.17871	3.25922	3.36747	3.42241	3.89583	3.24703	4.11977	5.1296	3.40455	4.03569	3.80886	3.42912	3.53925	3.41551	3.43784	3.86643	3.57228	3.29874	3.31507	3.94882	4.76131	3.17575	4.01529	2.97255	3.67849	3.60269	3.77345	4.13417	3.98061	3.74942	3.48941	4.30978	3.23982	4.52238	4.07587	3.78062	3.77934	3.13455
ADAM23	4.94117	5.19385	4.83566	3.79526	3.74242	4.36338	4.3211	3.98889	4.13591	4.79808	3.57566	4.16434	3.96358	3.60935	3.73845	4.24398	3.44771	4.27521	4.36313	3.60393	3.8133	3.74567	3.77976	3.90108	4.13204	4.06433	3.42094	3.79869	3.63166	3.79355	4.16904	4.89089	3.75371	3.6919	4.74929	3.65552	3.37988	3.69005	4.19508	4.31733	4.29368	4.0232	4.23308	3.52566	4.3272	4.16576	3.67792	4.36671	4.58146
ADAM28	6.97302	7.0839	7.39924	5.93757	6.83052	6.40947	6.41164	6.24732	6.48693	6.83555	7.51679	6.92261	6.42246	7.1734	7.10023	7.18933	5.28864	6.65169	5.40794	6.58472	6.34879	7.00221	7.21366	6.4958	7.03806	6.44021	6.56632	5.50706	6.24036	6.07773	6.64731	6.79963	6.27116	6.53517	5.60255	6.11517	6.54199	5.83211	5.61322	7.04839	6.94156	6.45566	6.26666	6.69773	6.85571	6.627	6.55826	6.37895	7.0678
ADAM29 /// LOC101928551	2.29538	2.34865	2.71921	1.94795	3.17282	1.88073	4.38148	2.54501	3.25384	2.38147	2.47991	4.23835	2.08845	2.31128	2.43439	2.67072	1.99514	3.3466	3.07462	2.56675	2.55315	2.17392	2.14649	2.329	2.13055	2.41041	2.34514	2.49634	2.71961	2.13029	2.26992	5.01981	2.24296	2.42012	1.9779	2.60017	3.19634	2.21288	4.35147	3.40229	2.02267	2.31735	3.41556	3.29576	2.47729	2.80943	2.34906	2.78112	2.21216
ADAM30	3.21145	2.99661	2.75412	3.86368	4.53547	2.87949	3.5755	3.7628	3.84911	3.87788	2.81865	3.64061	2.71845	3.022	2.84236	3.69896	3.24542	4.4066	4.38758	3.30348	3.4733	3.20298	3.00247	3.36422	3.05275	3.2848	3.08735	3.2557	3.84742	2.8771	3.8043	3.97199	2.89169	4.35595	3.15747	4.07419	3.87098	3.28578	3.57823	3.49448	2.93565	3.11592	4.76786	3.27202	4.29059	3.49607	4.08408	3.50079	3.26832
ADAM32	4.42986	4.46123	3.23752	5.50456	6.19282	2.70588	4.93595	4.63768	5.73563	4.86247	3.09114	5.56453	2.78203	3.20868	2.96216	5.03113	3.31613	5.90144	5.31214	3.78343	3.73962	4.84482	3.44064	4.90504	3.03349	2.98807	4.46543	3.41073	3.10611	2.56464	4.5886	6.0211	2.29882	3.8063	2.59892	5.06829	3.35381	4.30417	5.20164	4.9932	3.51401	2.81138	4.42656	3.92833	5.21401	5.05579	4.40375	3.5769	2.73299
ADAM33	5.15001	4.94355	4.77571	5.33216	5.91041	5.00825	5.94289	5.34875	5.39579	5.50286	4.59876	6.03763	4.79766	5.05797	5.32925	5.54304	5.08841	5.34563	5.71043	5.2135	5.2545	5.07238	4.85564	5.01147	5.24432	5.10691	5.0591	5.40965	5.37362	4.78337	5.15103	5.87146	4.43538	5.57842	4.49367	5.69268	5.26639	4.93159	5.68041	5.53284	4.67188	5.34617	5.93286	5.23442	5.68559	5.51282	5.84408	5.25462	5.1353
ADAM3A	3.50788	3.70466	3.20741	3.4885	4.29025	3.04758	3.9378	3.47844	3.23546	4.47377	3.16747	3.40454	3.23776	3.08216	3.11876	3.77672	2.88954	3.96599	3.73562	3.87931	3.11131	3.03231	3.04499	3.86996	2.84176	3.13295	3.20163	3.29443	2.94639	3.02666	3.63215	3.26551	2.87622	3.20613	3.4215	4.50648	3.61254	3.77806	3.12124	3.68726	3.07719	3.23625	3.53507	3.10846	4.29509	4.50724	3.90804	3.42907	3.27562
ADAM3B /// ADAM3B	3.49371	2.78729	2.73311	3.045	3.16698	3.00813	3.4543	3.39397	3.35962	3.01958	2.90936	3.55208	2.93347	2.76964	2.82177	3.06436	3.19747	3.46162	3.4012	2.85818	3.45051	3.41023	2.93204	2.92732	2.88968	2.98033	3.59352	2.74904	3.2929	2.9234	3.10553	4.04356	3.20406	4.0839	3.16489	3.07369	3.10247	3.02176	3.41659	3.4617	2.59058	3.03356	3.7784	3.16025	3.29395	3.32396	3.23532	3.27645	3.26843
ADAM5	2.82769	2.40003	2.37358	2.5785	3.00328	2.18022	2.9688	2.55364	2.14922	2.45891	2.11696	2.98265	2.18358	1.97776	2.18258	2.45214	1.9501	2.94473	2.80598	2.51643	2.44137	2.08371	2.07007	2.42766	1.93168	2.18867	2.27847	2.4748	2.32027	2.08955	2.26952	2.2404	2.03768	2.30996	2.2233	2.63528	2.45153	2.56182	2.05784	2.23399	2.08798	2.39595	2.6048	2.62247	2.60269	2.33887	2.58493	2.55594	2.26788
ADAM6	4.41842	3.85257	3.78478	4.01047	4.01495	3.69511	3.89662	3.93386	3.91307	3.67683	4.17664	4.00107	3.78779	4.08734	3.95376	3.95942	4.05587	4.38843	4.07636	3.71532	4.5751	4.02037	3.87474	3.81369	3.59572	3.95942	4.39836	4.63078	4.38804	3.71126	3.86006	3.89735	4.23802	3.96498	4.02493	3.94273	3.90034	4.34882	4.3391	3.90537	3.91716	4.18485	4.37612	4.13827	4.11592	4.44007	3.93841	4.28869	3.95942
ADAM7	3.20583	3.06839	3.30558	3.47777	3.84454	2.84664	3.8508	3.00369	3.04881	3.32087	3.17195	3.71071	3.24331	2.69802	3.01302	3.60618	2.94505	3.89361	4.00679	2.88593	3.47693	3.09251	3.13109	3.52447	3.13109	2.7618	3.14596	3.11576	3.23903	3.34457	3.49972	3.43464	2.74872	3.28388	3.29849	3.19452	3.02489	3.27912	3.27245	3.37376	3.29422	3.23236	3.612	2.79036	4.28382	3.69341	2.6266	3.19414	3.11768
ADAM8	8.38637	8.26513	8.40128	8.93793	8.36492	8.45968	8.62708	8.62827	8.28102	8.54513	9.09215	8.31485	7.13811	8.68727	8.80438	7.96042	8.37252	8.23492	7.8365	8.32149	8.44208	8.46065	8.37434	8.72131	8.98079	8.91672	9.04074	8.61984	8.80256	7.61849	8.13739	8.32667	7.65751	8.32231	7.51548	8.47673	8.7553	8.98531	8.34314	8.15731	8.5938	8.96317	7.9643	8.72739	8.65851	8.72448	8.22921	7.9002	8.76814
ADAM9	5.19508	5.58352	5.00214	6.86169	5.65707	5.917	5.63912	5.54864	6.27847	5.74294	4.86515	6.10105	5.33715	5.32083	5.25616	5.87554	5.78981	5.44638	5.83923	4.95712	5.83044	6.09764	5.27889	6.24133	5.42679	6.29373	6.15007	5.48011	6.10086	6.46708	5.19377	5.6264	5.44835	5.79057	5.97261	5.70099	5.56799	6.38625	6.22187	6.13926	5.30494	5.68518	5.91503	6.05649	6.09106	6.40924	5.52869	5.29951	5.50136
ADAMDEC1	4.1661	4.21886	3.88384	4.67357	5.21738	3.47157	6.14519	4.89128	5.47638	5.14123	4.90876	5.83517	5.12387	3.146	3.47389	5.06357	3.27368	5.88833	5.56746	4.8061	4.87213	4.84901	3.85737	4.77389	4.2404	3.96709	4.50463	4.08185	4.66539	6.02305	4.74205	7.00398	4.63544	4.91942	4.11059	4.35389	3.87039	5.36927	6.63822	5.54773	4.4448	4.32841	5.46012	5.29512	5.17083	4.78952	4.86725	4.35316	4.8132
ADAMTS1	4.3212	4.09708	4.58016	3.95427	4.00518	4.20683	3.78674	3.86797	4.11984	3.82028	4.13003	3.18826	4.65426	3.74998	3.25088	4.00946	4.1329	4.39935	3.91905	4.05863	4.29795	3.91138	3.71678	4.17058	4.33272	3.5085	3.57084	4.42928	3.76565	4.39593	4.40665	3.7969	4.33208	4.01529	4.5597	3.5437	4.1182	3.83925	3.32197	3.19806	3.44484	4.57892	3.52228	4.33788	3.76873	3.87586	3.41485	3.47146	3.63697
ADAMTS10	5.0831	4.68741	4.69266	4.69484	4.46517	4.66823	4.75148	4.43382	4.51863	4.68524	4.65634	4.69401	4.84989	4.84879	4.64515	4.35815	4.46633	5.0005	4.67967	4.66453	4.41625	4.53252	4.54345	4.53899	4.9261	4.90063	4.77095	4.67201	4.36468	4.66323	4.79699	4.69647	4.74345	4.64114	4.57341	4.03742	4.4691	4.86819	4.69449	4.59192	4.88915	4.79319	4.60137	4.59771	4.84206	4.59227	4.20712	4.24174	4.29667
ADAMTS12	3.97663	3.69242	3.62138	4.00312	4.46287	3.6429	4.51461	4.17157	4.14442	3.75543	3.77668	4.36251	3.74119	3.89664	3.84092	3.97981	3.94441	4.42158	4.95495	3.86757	4.05764	3.57432	3.52668	3.79031	4.11135	3.87263	3.97955	4.05047	3.88742	3.97125	3.80895	4.59035	3.83066	4.18467	3.90754	4.05508	3.98543	4.07359	4.06497	4.29063	3.72645	3.93425	4.21967	4.23195	4.35822	4.32059	4.16378	4.04002	3.58824
ADAMTS13	5.34462	5.32838	5.34337	5.1579	5.20883	5.351	5.70697	5.29409	5.0026	4.97212	5.32091	5.53907	5.34628	5.47846	5.62286	5.23877	5.24336	5.27939	5.658	5.1125	5.26574	5.325	5.25026	5.21544	5.2291	5.3795	5.45942	5.19702	5.4238	5.43821	5.05973	5.3158	4.93877	5.49087	5.38344	5.56014	5.5115	5.35698	5.17381	5.13502	5.1566	5.45831	5.49922	5.26947	5.19791	5.0809	5.46587	5.27193	5.22525
ADAMTS14	4.05983	4.09078	4.32774	4.17457	4.00834	3.85212	3.91498	4.4346	3.61673	4.2742	4.08256	4.36856	4.21018	4.50399	4.32653	3.91015	3.93514	3.99059	3.68279	3.996	3.99793	3.83571	4.028	4.12641	4.23202	4.19572	4.58662	4.07905	3.79568	4.15229	4.027	3.79912	4.07667	4.08599	3.93342	3.92357	4.63558	3.82162	3.95651	3.8767	3.85116	4.81884	3.68051	4.07667	4.07667	4.42545	4.00022	4.2724	4.27158
ADAMTS15	4.3061	3.9608	3.78315	3.77672	3.7878	3.92931	3.50395	3.74727	3.76493	3.73055	3.98673	3.82081	3.98509	4.18384	4.18956	4.06684	3.77947	4.45554	3.93311	3.86232	3.80498	4.0126	3.92679	3.96931	3.86076	3.92341	4.16519	3.92564	3.74024	4.12053	3.7621	3.96433	3.82787	4.02771	4.09323	4.26139	4.39027	4.26706	4.01906	3.93735	3.76851	4.3071	3.7386	3.62849	4.07155	4.03391	4.08831	3.88964	3.82919
ADAMTS16	5.30104	4.69419	4.74225	5.73436	5.48653	5.11012	5.48225	5.3657	5.59428	4.88293	5.03835	5.4614	5.04973	5.18847	5.05721	5.24318	5.17515	5.66087	5.69063	5.33433	5.46915	5.21887	5.00678	5.15071	4.8126	5.30226	5.17515	5.27816	5.27071	5.30164	5.15117	5.52755	4.89269	5.57425	5.27554	5.56166	5.44618	5.48499	5.6043	5.48338	5.10298	5.08243	5.8083	5.4839	5.46733	5.37457	5.99591	5.14022	5.36614
ADAMTS17	4.2966	3.93779	4.72976	3.19841	3.7112	3.28757	4.02242	3.88534	3.87875	4.05306	3.75659	4.42949	5.51851	4.10456	3.37993	4.36551	3.94846	4.17509	3.69458	4.14284	4.43703	3.32592	4.0003	3.79653	3.80347	3.93695	4.52678	3.87249	3.76824	3.5767	3.65194	3.72648	3.35429	4.06545	4.19515	4.22943	4.31812	3.60552	3.92123	3.85928	4.45627	4.14004	3.63454	4.12707	3.94657	3.19116	3.83645	4.41872	3.61004
ADAMTS18	3.29254	3.28446	3.00845	3.65653	3.87493	3.09238	4.25907	3.97059	3.6415	3.26456	2.95384	4.03404	3.11007	3.34226	3.29806	3.39964	3.01735	4.05508	3.7951	3.38299	3.11515	3.19508	3.02683	3.20197	3.29997	3.10421	3.39585	3.52868	4.01128	3.05306	3.05138	4.45841	2.78713	4.09901	2.94832	3.30113	3.30262	3.51211	4.2773	4.03507	2.61193	3.10175	4.46671	3.47639	3.29111	3.61205	4.35347	3.42729	3.20295
ADAMTS19	2.70303	2.90141	2.45571	3.4973	3.69653	2.57992	4.30452	2.64722	3.11109	4.5348	2.42576	3.69798	2.55446	2.61368	2.52381	3.0285	2.51959	2.72234	4.85038	2.74506	3.23024	2.93617	2.64065	2.83252	2.46832	2.71657	2.87508	2.78283	2.87007	2.49212	4.09004	4.4013	2.53681	2.72573	2.72641	3.29231	2.67346	2.96158	3.89576	4.05767	2.75251	3.06995	3.56382	3.08025	4.93724	4.73179	3.45477	3.56447	2.75465
ADAMTS2	3.96596	3.73495	3.72595	5.67078	3.66481	3.9881	4.70188	4.34266	5.32974	3.65391	3.9571	3.83944	5.30255	4.17565	4.36026	4.16922	4.34854	3.98184	3.45046	3.64568	3.83446	4.02525	3.7917	3.84114	3.95908	4.20228	4.79913	4.31654	3.90799	5.64428	3.76791	3.34664	3.94168	5.32807	4.20542	4.18425	4.31274	4.36396	3.95543	4.42061	3.71689	4.21369	3.69931	4.2568	4.37174	3.79677	3.74862	3.83924	4.6806
ADAMTS20	2.83765	2.60755	2.66288	3.15768	3.34352	2.48898	3.34713	2.84022	3.09498	3.22262	2.56388	3.11092	2.24706	2.29095	2.67369	3.04501	2.60218	3.75874	3.29076	2.54508	2.64968	2.76576	2.54445	2.86666	2.5443	3.12173	2.73858	2.94764	2.92044	2.42204	2.8055	3.48064	2.29417	3.03597	2.24322	2.8163	2.78945	2.85453	3.11754	2.70493	2.50045	2.83761	3.10746	3.22492	3.32925	3.23192	3.14629	3.12574	2.64826
ADAMTS3	3.22083	3.60197	2.51203	5.53953	5.06562	2.555	5.46559	3.20583	4.54821	3.91149	2.44703	5.2303	2.80373	2.38558	3.14447	3.60618	3.3602	4.13775	5.86078	2.7937	3.84917	4.97572	3.02797	2.85782	3.21659	2.66624	3.85037	2.51848	2.95554	3.15563	3.49027	5.00506	2.78936	3.9655	2.85768	3.37439	3.74778	3.05078	4.79023	4.84865	3.35541	4.41431	4.12554	3.02196	5.67305	3.3942	4.3013	3.80038	2.75892
ADAMTS4	3.59625	3.80603	4.03846	3.56721	3.19111	3.78275	3.82208	3.68378	3.23679	3.49117	3.75493	3.45601	3.76586	4.17394	3.93472	3.34214	4.02264	3.7186	3.73435	3.23917	3.64998	3.50114	3.86105	3.60748	3.64325	3.67627	3.99396	4.17772	3.91438	3.92531	3.68727	3.59919	3.66238	3.63478	4.02923	3.47692	4.32713	3.99957	3.48668	3.47535	3.84209	3.90393	3.55091	3.83057	3.50484	3.70429	3.99124	3.63215	3.90728
ADAMTS5	5.01074	4.97413	5.30387	5.5994	6.83407	4.92495	5.24868	5.60982	7.09584	6.42439	3.26709	4.98911	5.16192	4.66753	4.46453	5.67808	5.15631	6.91495	5.76103	4.55982	4.80032	5.12633	3.27603	6.01159	6.03189	5.79895	4.9626	4.03025	4.13586	3.09695	5.49755	5.60394	2.97922	5.53714	4.87708	5.04162	4.53894	5.65997	4.59509	4.9687	4.65123	2.94084	5.04907	5.54781	5.99979	6.48189	4.2386	3.93586	5.47023
ADAMTS6	3.55922	3.87155	2.96899	3.15318	2.95618	3.23576	2.99492	3.24033	3.06912	3.727	2.91108	3.25487	3.28371	3.33266	2.79391	3.95742	3.09249	3.21189	3.17899	3.44568	3.09902	3.25785	3.08663	3.15419	3.18799	3.17324	2.88056	3.39	3.56726	3.30524	2.70931	3.07216	2.86168	3.20636	3.33231	2.95782	3.05451	2.86871	2.86451	3.71119	3.51836	3.55851	4.02318	3.13962	3.34397	3.00405	3.08157	3.81877	3.45025
ADAMTS7	4.52089	4.22062	4.32448	4.55275	4.28439	4.57088	4.35643	4.15191	4.12087	4.33924	4.42127	4.49986	4.41062	4.34783	4.6032	4.36603	4.43904	4.27106	4.28563	4.33361	4.43703	4.094	4.33924	4.42982	4.21159	4.52033	4.76142	4.35589	4.15455	4.34943	4.1009	4.05362	4.41979	4.69222	4.4072	4.29806	4.56187	4.85548	4.55435	4.3039	4.37266	4.59341	4.29772	4.38291	4.33612	4.24388	4.33191	4.48533	4.35931
ADAMTS8	4.53706	4.3358	4.10557	4.46921	4.31764	4.37299	4.56548	4.5949	4.29571	4.45161	4.39472	4.47612	4.29924	4.0931	4.37486	4.38058	4.78532	4.87085	4.85024	4.75416	4.39289	4.23677	4.3908	4.30263	4.23343	4.51389	4.62895	4.65122	4.20374	4.47363	4.20092	4.50693	4.33895	4.83559	4.75009	4.82565	4.64422	3.97018	4.34021	4.44136	4.60045	4.5573	4.36802	4.42406	4.47562	4.02344	4.39848	3.98048	4.46291
ADAMTS9	3.4279	3.28479	3.44699	3.76382	4.15261	3.31279	4.50046	3.43359	4.39386	4.22588	3.34136	4.24292	3.5678	3.57579	3.52008	3.62806	3.35261	4.27227	4.41535	3.33221	3.92326	3.41825	3.24805	3.26358	3.38744	3.26986	3.51815	3.53894	3.57033	3.53795	3.85446	4.35865	3.34815	4.16103	3.45261	3.56846	3.4529	3.51811	4.16324	4.26286	3.22376	3.6111	3.96258	3.50426	4.26614	4.39119	3.75366	3.58147	3.47548
ADAMTS9-AS2	3.20583	3.15281	3.36241	3.89753	4.56245	3.15069	4.37908	3.83062	4.54155	4.2272	3.28304	4.12833	3.02177	3.25498	3.31966	4.10266	3.48146	4.21117	5.49957	3.09084	3.78151	3.49047	3.15299	3.44246	3.48021	3.4422	3.18161	3.4408	3.85207	3.3707	3.84391	4.90607	3.08363	3.94128	3.44645	4.46508	3.61254	3.88319	4.55653	4.07166	3.24837	3.24948	5.09156	3.73688	5.29136	3.92248	4.46173	4.28973	3.42856
ADAMTSL1	2.81116	2.69666	2.85932	2.84138	2.92792	2.76297	2.89044	2.77626	2.7828	2.6188	2.76441	2.7637	2.5993	2.68241	2.63003	2.62586	2.54119	2.96484	2.9744	2.80361	2.54524	2.77225	2.67317	2.58837	2.65876	2.61896	2.5606	2.6991	2.57896	2.81628	2.68154	2.74025	2.58625	3.03227	3.03478	2.80372	2.64465	3.0257	2.75441	2.80769	2.61193	2.57914	2.96092	2.59615	2.50737	2.58947	2.76358	2.80193	2.76416
ADAMTSL2	4.36391	3.90532	4.16278	3.9473	3.40462	4.25221	4.36151	3.82531	3.95425	4.07667	4.16996	4.0701	4.7762	3.99873	4.36411	3.91287	3.88706	4.40264	4.54366	4.05652	3.84574	4.29856	4.26102	4.18212	4.36606	4.17083	4.65212	4.44776	3.96833	4.21066	3.96762	4.13443	4.50315	3.51074	4.67519	4.27765	4.27671	4.41577	3.69327	3.59679	4.29125	4.67575	4.07043	4.16996	3.93873	3.6095	4.3013	3.93804	4.41293
ADAMTSL3	3.18391	3.1378	3.42562	3.70698	3.62486	3.47915	3.48199	3.74845	3.82678	3.24694	3.39641	3.30758	3.42515	3.3018	3.72955	3.65768	3.23916	3.02695	3.83867	3.55898	3.5529	3.40822	3.35603	3.24091	3.42794	3.3508	3.61219	3.72948	3.67297	3.49998	3.25705	4.0359	3.22033	3.31391	3.42243	3.72138	3.75416	3.76601	3.66984	3.55449	3.34155	3.73368	3.72447	3.62373	3.71773	3.18385	3.55354	3.54255	3.66825
ADAMTSL4	7.60414	7.77177	7.63675	7.53271	7.13838	8.30143	8.02324	8.07898	8.6601	7.4055	7.32315	7.55121	6.82486	8.09029	8.57071	7.50835	7.85753	7.9119	7.26419	7.89776	8.04276	7.80032	7.56905	8.75595	7.44832	7.90792	7.65679	8.43376	8.31294	6.55261	7.69808	6.74	7.27212	7.57895	6.80568	8.28431	7.73034	7.62029	7.64117	6.49873	7.32636	8.27265	6.76466	8.4468	7.91362	8.16311	7.27386	7.23532	7.31854
ADAMTSL5	5.20703	5.13069	5.20192	5.03019	5.23355	5.10363	4.98078	5.19719	5.15993	4.9268	5.04786	5.26124	5.36792	5.36191	5.47563	5.24922	5.08324	5.69289	4.73913	4.99059	4.81761	5.31826	5.26668	5.48831	5.32928	5.20059	5.44619	5.21106	5.15805	5.23804	5.17984	5.00506	5.18867	5.40948	5.07548	5.06569	5.45338	5.33223	5.13322	4.92606	4.94213	5.05855	5.33957	5.13052	5.52207	4.4895	5.18768	4.69375	5.33759
ADAP1	7.13821	7.32554	7.61808	7.68872	6.98679	7.52815	7.14839	7.52851	7.10871	6.91388	7.60609	6.7763	7.87571	7.83233	8.02458	6.95806	7.3159	7.61078	6.82878	7.50526	7.30185	7.76223	7.17827	7.6952	7.90195	7.65526	7.89782	7.81072	7.73525	7.67467	7.27634	6.59288	7.50378	7.36463	7.78341	7.58453	7.7462	8.2462	6.87364	7.08382	7.70434	7.88424	7.12854	7.68928	7.46451	7.79184	7.41948	6.86486	7.62606
ADAP2	7.21641	7.45869	7.04075	7.2442	7.11772	7.98447	7.30645	7.47175	7.4193	7.08749	7.00486	7.00688	8.6049	7.58519	7.69071	7.24494	7.39648	7.12862	7.41836	7.87111	7.63631	7.59742	6.56825	8.09376	7.61238	7.58838	7.39367	7.7225	7.42224	8.32007	7.21941	6.84811	8.35843	7.15323	8.27666	7.76914	7.40527	8.07538	7.19768	7.15608	7.38455	7.1236	6.99134	7.52229	6.2655	7.55914	7.04606	6.39255	7.40707
ADAR	12.9587	12.9717	12.7943	12.941	13.0976	13.0674	13.0658	13.0439	13.0968	12.6429	12.8553	13.0875	12.3403	13.0948	13.208	12.9807	12.9492	13.1331	13.0139	13.0057	12.9269	13.0507	13.1474	13.0335	12.7265	12.7986	12.8735	13.2679	13.159	12.6635	13.0503	12.8532	12.7513	13.0045	12.5842	13.0997	13.1235	13.0017	13.1773	12.8339	12.8152	13.2468	12.8654	13.244	13.185	13.1808	13.0801	13.1172	12.7452
ADARB1	4.87663	4.61959	5.03149	4.25693	4.64589	4.98542	4.57009	4.58016	4.2919	4.68318	5.00829	4.68396	4.63779	5.03992	4.95903	4.59489	4.4328	4.78919	4.52938	4.86419	5.0981	4.37199	5.1275	4.68086	4.77125	5.04839	4.72417	4.68562	5.02334	5.66376	5.0151	4.47057	4.89931	4.75902	4.97106	4.88785	4.61085	4.76388	4.79023	4.73266	4.6155	5.1524	4.76445	4.86088	4.1904	4.11264	4.38323	4.87338	4.7294
ADARB2	4.11763	3.519	4.13734	4.90187	4.18027	3.61651	3.92602	4.12001	3.86476	4.04129	3.85324	3.60953	3.65427	3.96394	4.31627	3.94798	3.73329	4.2577	3.69834	3.87412	3.73296	3.74535	3.63236	3.61781	3.61228	3.73021	4.01114	3.99324	3.78852	3.7755	3.92996	3.79045	3.46071	3.83724	3.81414	4.06896	4.00925	3.99894	3.81886	3.62773	3.60933	3.83115	3.94399	3.95748	3.90964	4.89648	4.28085	3.87052	3.68479
ADARB2-AS1	4.55945	4.70628	4.34411	4.66223	4.55965	4.64143	5.0434	4.78192	4.27977	4.51915	4.80566	4.49528	4.72389	4.96974	4.9776	4.51518	4.75715	4.87438	4.98311	4.67548	4.52852	4.4902	4.54889	4.97534	4.63199	4.92374	5.29741	4.61458	4.7841	4.60593	4.61399	4.89442	4.7783	5.08485	4.7101	4.78539	4.77197	4.77715	4.71546	4.76868	4.68578	4.87106	4.6714	4.74846	4.77525	4.5023	4.45851	4.98198	4.77183
ADAT1	8.29379	8.45298	8.47595	7.86442	7.58659	8.51662	8.06506	8.29442	7.94865	8.53068	8.82055	8.44421	8.50291	8.12454	8.14903	8.15611	8.33081	8.64184	7.73211	8.47873	8.59515	8.66862	8.54825	8.23424	8.45431	8.5184	8.27839	8.45501	8.27663	8.70528	8.29123	8.21197	8.7336	8.4429	8.38288	8.0889	7.70807	7.90242	8.00961	8.35294	8.37231	8.74667	8.43497	8.14801	8.18613	8.04036	7.9545	8.29003	8.54299
ADAT2	6.23189	6.06413	6.23681	5.07821	5.02681	6.07055	5.28603	5.34004	4.97977	5.92349	5.89229	5.3322	5.86221	6.14573	5.67356	5.78789	5.68964	5.26628	5.13934	5.93039	5.76301	5.36189	6.29464	5.52057	5.35499	5.31825	5.03538	4.82078	5.04024	4.76119	5.74	5.05042	5.9536	5.53406	5.80143	5.57531	5.74996	5.46872	5.38874	5.8334	6.62498	5.58309	5.99309	5.37423	5.04716	4.85999	5.12477	6.28622	5.77512
ADAT3	4.87071	4.95853	4.81174	4.78862	4.57142	5.15709	4.67277	4.84332	4.67108	4.47299	5.22303	4.60042	5.09548	5.1529	4.95795	4.33589	5.19483	4.72307	4.77506	4.87593	4.75973	4.86619	5.00779	4.8955	4.92976	4.91326	5.04284	4.95566	4.71622	5.45417	4.85775	4.17071	5.05506	4.85895	5.3685	4.79957	5.04279	4.8865	4.2316	4.64249	4.96654	4.94124	4.90395	4.96568	4.12031	4.45815	4.89229	4.5823	4.88288
ADAT3 /// SCAMP4	4.85042	5.31046	5.42221	5.16273	4.94596	5.99165	5.13714	5.58579	3.89226	4.42812	6.03782	4.45427	5.84709	5.41539	5.15086	4.6646	6.1765	5.0625	4.87868	5.52297	4.83034	5.09106	5.67891	4.90504	5.36956	5.38242	5.2106	5.62689	4.8458	5.97759	5.38578	4.34853	6.19999	5.72204	6.06858	5.31629	5.239	5.27924	4.62638	4.826	5.46114	5.2388	5.22622	5.18692	4.4084	5.076	5.04941	5.03343	5.1875
ADCK1	6.57722	6.64758	6.28215	5.4644	5.28464	6.64182	5.87026	6.17613	6.3644	6.3576	6.49932	5.95429	7.18105	6.59755	6.77706	6.18237	6.03946	6.2907	5.85928	7.01419	5.7647	7.27501	6.46687	6.82967	6.40298	6.14308	5.94493	6.31076	6.16972	6.90278	6.38163	5.81709	6.72785	6.32929	6.92231	6.01815	5.9982	6.66226	5.98659	5.92426	6.63613	5.91648	6.03676	6.39286	5.3115	6.16765	5.51766	5.82919	6.42034
ADCK2	6.1877	5.97797	6.23407	5.75936	5.29987	5.97143	5.29219	5.95885	5.26261	5.67633	6.046	5.39515	7.12077	5.92948	5.85086	5.84993	5.90828	5.95085	5.40484	6.20682	5.54239	5.82554	5.90261	6.00277	6.13565	6.00194	5.70845	5.83911	5.81761	6.67112	5.93226	5.02312	6.33371	5.8625	6.52682	5.26488	5.67807	5.6841	4.79351	5.5361	6.16791	5.53885	5.8803	5.79474	5.1782	5.48717	5.52952	6.36097	5.9973
ADCK3	8.05062	7.90337	8.25726	7.94261	7.59889	7.72476	7.84157	7.79812	7.88486	8.0312	8.19145	7.65888	7.90099	8.03056	7.95437	7.96426	7.59455	7.92138	7.66646	7.94134	7.58216	8.19747	7.82361	7.75251	7.95947	7.91196	8.07691	7.65829	7.64532	7.9212	7.67851	7.60691	8.054	7.83886	8.19318	7.42978	7.97042	8.23955	7.66605	7.88017	8.03633	7.97856	7.68743	7.74371	7.95248	7.93759	7.76119	7.38094	7.98686
ADCK4	5.51515	5.70002	5.48837	5.72151	5.58814	5.62718	5.53388	5.80252	5.8765	5.55799	5.78716	5.71263	5.47424	5.82025	5.88352	5.37552	5.87817	5.90018	5.52989	5.57447	5.824	5.9958	5.76192	5.75401	5.85158	5.89565	5.87633	6.06374	5.72783	5.68353	5.49717	5.45268	5.43686	5.83855	5.54147	5.25596	5.88741	5.90972	5.3953	5.67486	5.67605	5.95988	5.60935	5.69212	5.67719	5.79629	5.74812	5.39379	5.64687
ADCK5	4.87299	4.88814	4.80193	4.72704	4.53527	4.66841	4.53538	4.73212	4.39383	4.91703	4.91006	4.5156	4.90413	5.21451	4.68603	5.27115	4.46919	5.02482	4.85404	4.8312	5.07521	4.8802	4.84192	4.8074	4.80892	5.20911	5.21347	4.64095	4.70985	4.97139	4.69029	4.18527	5.22347	4.30362	4.8939	4.95704	5.016	5.34254	4.03912	4.29586	5.01868	4.88002	4.27296	4.98798	4.47742	4.65767	4.87952	4.68602	4.9692
ADCY1	3.71752	3.46257	3.46032	3.2249	3.30865	3.35429	3.38476	3.33709	3.56811	3.45347	3.45656	3.73951	3.66791	3.37947	3.72544	3.60605	3.50763	3.67568	3.68088	3.35875	3.42638	3.51151	3.36805	3.33689	3.59802	3.37289	3.798	3.55508	3.43428	3.51703	3.23247	3.59648	3.22407	3.41523	3.52593	3.51596	3.5074	3.92854	3.17385	3.42903	3.53195	3.54862	3.36788	3.30847	3.45347	3.29083	3.64352	3.38612	3.8305
ADCY10	2.95797	2.70724	2.55628	3.23825	3.46793	2.58497	3.45891	3.1287	3.89031	3.35309	2.50608	3.23101	2.46605	3.23069	2.56391	3.32412	2.68638	4.14896	3.67805	3.4476	3.0764	2.95981	3.00211	2.4906	2.62283	2.89624	2.92583	2.82743	3.23074	2.34208	3.03818	3.87719	2.61509	3.47737	2.5207	3.16273	3.28309	2.72109	3.56826	3.11576	2.79242	2.80629	3.55111	3.25637	3.63497	3.41933	3.63783	2.92021	2.97554
ADCY10P1	5.66319	6.11718	6.3849	6.42903	5.7831	6.45652	6.18529	6.49526	6.51847	6.30113	5.88922	6.30205	4.63333	6.38694	6.9356	5.89959	6.2372	5.85158	5.42953	6.20012	6.85875	6.35949	6.44031	5.92662	5.99979	6.33725	6.98843	6.5872	6.48693	4.43481	6.00498	5.52804	5.17758	6.25125	4.38442	5.93112	6.87291	6.29641	5.48526	5.93445	6.43134	6.77217	5.38763	6.83849	6.29416	6.27373	5.4796	6.46865	6.1207
ADCY2	4.01732	3.81183	3.69352	3.82846	4.61054	3.91514	4.88991	4.35933	4.28716	4.57764	3.73261	4.36	3.93432	4.14362	3.61588	4.55254	4.04906	4.32747	4.83879	4.20893	4.25188	3.86234	3.886	3.84211	4.18104	4.09364	4.15778	4.32911	4.48874	3.92486	4.19652	4.79876	3.49978	4.4007	4.09905	4.53813	4.02449	4.28615	4.79023	4.38216	4.02294	3.97214	4.59943	3.88582	4.39096	4.46451	4.79437	4.40938	4.04368
ADCY3	6.79209	7.43884	7.05319	7.57442	6.40543	7.49788	7.19822	7.17746	7.23285	7.00181	7.11451	7.59647	7.90027	7.75839	7.5255	6.63725	7.94934	6.9875	6.72131	7.16504	6.87516	6.70048	8.01226	7.94006	7.08447	7.24423	7.09751	7.07952	8.05358	8.40217	7.09521	6.65567	8.15592	7.23181	7.79329	7.37572	7.09836	6.52977	7.99543	6.87246	7.3323	7.72604	7.03796	7.3491	6.65705	6.44605	6.55318	7.25509	7.64004
ADCY4	7.63176	7.73794	8.01454	8.66719	8.60308	8.35803	8.28389	8.50385	8.02166	7.41863	8.31571	8.20946	6.11	8.55108	8.93169	6.96354	8.75443	8.42055	7.92392	8.15808	7.91091	8.36216	8.51042	8.37458	8.02681	8.14084	8.80372	8.98611	9.26799	6.85341	7.70941	7.06102	6.21457	8.10176	6.00756	8.24909	8.84852	8.58972	8.39373	7.52046	7.89356	9.22123	7.61654	9.06262	8.19584	8.74075	8.37869	7.91869	7.76184
ADCY5	4.22815	3.75402	4.23156	3.83379	4.13489	4.02407	4.24492	4.20161	4.34211	4.02309	3.92742	4.13012	3.88526	4.07829	3.84639	4.0188	3.882	4.46464	4.20424	3.97032	4.29782	3.93894	3.78878	4.12974	3.95499	4.06707	4.32177	4.06548	4.02736	3.8953	3.92454	4.02158	3.57543	3.98404	3.6262	4.12457	4.25768	4.03656	3.82006	4.00323	3.81033	4.20742	3.82909	4.08972	4.27194	4.31663	4.02584	4.39644	3.6844
ADCY6	2.50427	3.02377	2.66053	3.01903	2.85952	2.99651	2.37197	2.50981	2.59346	2.27673	2.93394	2.73915	2.7148	2.65832	2.53407	3.05675	3.04142	3.29669	3.31022	2.69898	2.94142	2.91158	2.81514	2.98029	2.71226	2.74825	2.83007	2.82391	2.88184	2.70788	2.59048	2.74193	2.76367	2.91458	3.03966	3.4493	2.72368	2.98455	2.81785	3.21811	2.68534	2.58973	3.41234	3.14996	3.01958	2.89879	3.30577	2.92218	3.59693
ADCY7	8.55055	8.82038	8.6577	7.80051	7.83693	8.83863	8.37125	8.33299	8.2028	8.60264	8.69226	8.32468	8.59125	8.52181	8.56724	8.56211	8.35314	8.73358	8.38419	8.68076	8.5341	8.80716	8.50395	8.94795	8.32513	8.70815	8.59661	8.52111	8.52239	8.71635	8.62548	7.91376	8.77761	8.17432	8.25745	8.25651	8.36893	8.46583	8.45691	8.06898	8.74002	8.63766	8.36995	8.59816	8.1792	8.61848	8.40677	8.51402	8.20262
ADCY8	3.94831	3.89356	4.50318	3.96263	4.09132	3.98096	3.68039	3.9487	3.42222	3.90593	3.9817	4.32097	4.41267	3.99579	4.12054	4.2884	3.8086	4.29009	4.09318	3.83593	4.09116	3.9776	3.92719	4.12641	4.21018	4.35898	4.10159	4.25249	3.97106	4.08037	3.71598	3.84564	3.8055	3.94776	4.60313	4.61708	4.38552	4.33769	4.00879	4.26488	3.93243	4.44602	3.60722	3.7457	3.89521	4.23946	3.70193	3.9397	3.85252
ADCY9	5.52682	5.65484	5.51363	4.92751	4.88445	5.98625	5.07986	5.9164	5.57816	5.53805	5.40988	5.50932	5.7458	5.60345	5.7654	5.27758	5.48848	5.58526	4.95531	5.28265	5.70014	5.08179	5.47553	5.8093	4.969	5.82975	5.29226	5.34865	4.30131	5.52552	5.8419	5.22843	6.12548	5.02138	6.46445	5.3695	4.48652	5.05867	5.30067	4.81753	5.97297	5.75549	5.66895	5.24719	5.6082	5.71382	5.67743	5.26885	5.28804
ADCYAP1	2.79711	2.05782	2.54096	2.49092	2.91049	2.27832	3.19792	2.59654	3.20033	2.8388	2.54465	2.14252	2.38341	2.55111	2.57598	2.73729	2.48791	3.3609	3.02368	2.43547	2.73011	2.62847	2.55525	2.47967	2.28796	2.57205	2.5694	2.84682	2.51081	2.4914	2.67383	3.05069	2.2783	2.71001	2.31078	2.35005	2.75992	2.61825	2.68135	2.47113	2.3368	2.36067	3.06376	2.70215	2.8903	2.54819	2.92131	2.25087	2.63858
ADCYAP1R1	3.40369	2.93893	3.27771	3.32864	3.55009	3.13269	3.61716	3.15239	3.49783	3.13165	3.14997	3.58021	3.18998	3.25042	3.20664	3.33101	3.33169	3.34333	3.36824	3.09149	3.54266	3.34005	3.09121	3.38102	3.19189	3.14584	3.01392	3.24502	3.16739	3.07817	3.25354	3.87978	3.05212	3.48671	3.33405	3.03621	3.44419	3.73687	3.08437	3.44145	3.20187	3.28201	3.095	3.20117	3.47996	3.17179	3.27449	3.13483	2.98083
ADD1	8.46031	8.55993	8.53923	8.54376	7.95564	8.53553	8.17137	8.15682	8.03895	8.15286	8.74686	8.24566	8.67893	8.55701	8.50651	8.13278	8.46014	8.17126	7.80405	8.34498	8.48495	8.34694	8.59012	8.50622	8.48058	8.61446	8.69274	8.47837	8.33121	8.71162	8.59722	8.22202	8.57853	8.22014	8.77606	8.36811	8.5621	8.74748	8.2421	8.42362	8.69436	8.66131	8.30943	8.37584	8.18453	8.6695	8.1359	8.3338	8.6669
ADD2	4.58521	4.53089	4.63049	4.61576	4.57517	4.47074	4.66837	4.44224	4.70526	4.66234	4.57596	4.66297	4.9834	4.50762	4.88715	4.68741	4.51606	4.73139	4.84466	4.67638	4.66993	4.49352	4.70791	4.68663	4.60158	4.66822	4.58068	4.69201	4.65242	4.68097	4.45592	4.67075	4.4935	4.69831	4.7533	4.93257	4.62495	4.72225	4.83479	4.75809	4.32164	4.5386	5.01634	4.45919	4.42296	4.25403	4.78327	4.75093	4.7607
ADD3	10.5358	10.4853	10.7459	10.7579	10.2767	10.2529	10.1998	10.4579	10.1974	10.2874	10.7602	10.3796	10.4137	10.4863	10.4414	10.5635	10.4896	10.2728	10.256	10.6343	10.0302	10.2679	10.5627	10.1697	10.4641	10.4239	10.519	10.264	10.467	10.5813	10.3816	10.1263	10.2453	10.3485	10.5396	10.3232	10.4861	10.4369	10.0607	10.3479	10.5071	10.4164	10.7258	10.4247	10.4085	10.0131	10.4611	10.7845	10.4961
ADD3-AS1	5.3082	4.86944	4.87835	6.00952	5.07166	4.87135	5.02552	5.05137	4.83066	5.15736	5.50384	4.46709	4.34456	5.48263	5.23241	5.16792	5.06831	4.97075	4.90318	4.94834	3.69798	4.63748	4.9938	4.97372	5.24133	5.60036	5.37973	5.62324	5.75919	4.36959	4.59015	4.58895	4.17296	4.64826	4.85627	4.65931	5.42964	6.01455	4.57752	4.33853	5.37624	5.10609	5.03629	5.17114	5.54203	4.76383	5.01212	4.08444	5.46006
ADGB	2.34771	2.47532	2.32478	2.81956	2.53552	2.18604	3.2734	2.60312	2.51913	2.49806	2.23058	2.38551	2.20275	2.34843	2.38682	2.35715	2.38483	2.85311	2.81405	2.49527	2.41757	2.30618	2.34279	2.30615	2.08561	2.05905	2.227	2.47004	2.37131	2.15086	2.41393	2.38921	2.41914	2.58723	2.13634	3.04726	2.56739	2.22556	2.82615	2.34072	2.36771	2.41284	2.922	2.34974	2.63222	2.9084	2.60055	2.91529	2.36707
ADH1A	2.93713	2.38722	2.71148	2.97269	2.71314	2.49981	3.26584	2.35741	2.74573	3.19068	2.79526	2.93608	2.4495	2.29957	2.53263	2.54762	2.75899	2.79829	2.71219	2.4397	2.87142	2.51561	2.60108	2.61118	2.61628	2.51113	2.76007	2.66101	2.43657	2.57498	2.71347	3.10741	2.42948	2.57806	2.57408	3.00666	2.66927	2.76027	2.9279	2.71382	2.49189	2.82419	2.71219	2.41791	3.02632	3.00956	2.74524	2.59852	2.64823
ADH1B	2.24117	2.28344	2.28882	2.54859	2.44516	2.03785	2.58982	2.26334	2.47452	2.2447	2.2763	2.68522	2.19916	2.36739	2.16488	2.5307	2.17998	2.86559	3.27538	2.27142	2.6909	2.42588	2.22993	2.25046	2.12199	2.22492	2.24667	2.2116	2.14789	2.37818	2.37796	3.57145	2.18123	2.3568	2.13297	2.68404	2.33923	2.54359	3.19435	2.70887	2.23809	2.21233	2.48101	2.41098	2.7275	2.65765	2.59967	2.77766	2.13567
ADH1C	3.72884	3.19545	3.22625	3.27104	3.43168	3.01523	4.09813	3.82706	4.20266	3.94198	3.07354	4.4471	3.21323	3.85541	3.38057	3.58843	3.09567	4.42216	5.3259	2.98972	3.66408	3.3521	3.01667	3.44025	3.35443	3.17493	3.36069	3.15526	3.0568	3.33879	3.63429	3.86102	2.91978	3.41682	2.98697	3.80761	3.56317	3.46226	3.50194	3.91952	3.14862	3.67733	3.90725	3.13109	3.71037	3.7329	3.5703	3.71696	3.23609
ADH4	2.86431	2.91861	2.85094	3.39594	3.52486	2.55784	4.45939	3.77299	3.79947	3.42139	2.74225	4.05286	2.56006	2.92849	2.81873	2.71435	2.89181	3.80071	4.03158	3.26879	3.13639	2.75215	2.74322	2.54973	2.68479	2.70526	2.95907	3.29944	2.95426	2.61397	3.04501	5.07344	2.71469	3.59653	2.60877	3.44984	3.55504	3.10092	4.76031	4.33706	2.63435	2.91587	4.31952	2.8263	3.52373	3.31642	4.21912	3.19792	2.97006
ADH5	8.50258	8.3348	8.38038	7.91392	7.97309	8.18115	7.83944	8.2112	7.80867	8.21069	8.62767	7.99485	9.0323	7.81194	7.63147	8.48058	8.18881	7.75613	8.2606	8.39477	8.22153	7.99055	8.07879	7.96126	8.12419	7.89686	7.80991	7.61679	7.71877	8.85655	8.5713	7.91935	8.74541	8.00524	8.98592	8.06486	7.84097	8.02774	8.00614	8.46892	8.47726	7.94759	8.19473	7.92926	7.37065	8.12518	7.84936	8.49946	8.48804
ADH6	3.26796	2.74472	2.79819	3.13247	3.87207	3.07356	3.71398	3.05801	3.30015	4.26719	2.82746	3.71344	3.02536	2.90437	2.91324	3.52197	3.23395	3.90828	4.19627	2.81574	3.19394	2.89249	2.99309	2.91842	3.00306	2.89874	2.99962	2.90649	2.76668	2.84352	3.93433	3.86307	2.8794	2.95944	3.00392	2.8889	2.81596	2.86117	3.70886	3.19584	2.9194	2.78268	3.1517	3.03596	4.27615	4.20043	2.8198	3.2975	3.07435
ADH7	2.14897	1.94463	1.9846	2.40416	2.19618	2.06429	2.33747	2.14828	2.15267	2.2906	2.11337	2.92388	2.26995	2.16931	1.79379	2.04497	2.02818	2.24413	2.56889	2.30209	2.36605	2.38265	2.13732	2.13423	2.0874	2.22599	2.28521	2.08776	2.15256	2.2015	2.06496	2.27833	2.03905	2.18546	2.52132	2.65223	2.07808	2.35828	2.29546	2.14849	2.40361	2.222	2.22462	2.33747	2.75801	2.81848	2.2208	1.89152	2.1097
ADHFE1	8.69962	8.67159	8.96462	7.41459	8.04216	8.75535	7.73717	7.45247	8.6367	8.78318	8.91387	8.05787	7.41338	8.3506	8.38078	8.55526	8.2137	8.25245	8.47879	8.64907	8.80632	8.63276	8.3021	8.59505	8.43665	8.62187	8.40701	7.43619	7.66094	7.49957	9.06947	8.54906	7.19751	8.42055	6.95354	7.75817	8.05537	8.14919	8.38774	8.71672	9.31822	8.16234	8.31592	8.89968	7.65255	8.10477	7.21096	8.59946	8.11007
ADI1	9.55091	9.47349	9.38716	8.77338	8.88764	9.38383	8.09606	8.96103	8.80976	9.31516	10.0369	8.70521	10.5092	9.39988	9.21134	8.49768	9.38536	9.04483	8.82939	9.44913	9.19885	9.46377	9.25332	9.75182	9.89988	9.48569	9.58163	9.06714	8.84671	10.3319	9.15884	9.11494	9.841	9.09536	10.1775	9.54601	9.46067	9.76463	8.8648	8.82883	9.02797	8.78226	9.24338	9.27261	8.35404	9.49928	9.42012	8.23653	9.3832
ADIG	4.53723	4.16918	4.21975	4.63009	5.14621	4.21026	5.0371	4.89959	4.94672	4.51602	4.51313	5.29042	4.17009	4.39663	4.40871	4.61632	4.26049	5.09298	4.98724	4.63049	4.435	4.41805	4.27082	4.22825	4.39415	4.42044	4.70794	4.51567	4.69825	4.23479	4.42467	5.16871	4.36506	4.73503	4.20493	4.58748	4.85743	4.36009	5.14938	4.72075	4.04002	4.62526	5.43351	4.65507	4.76049	4.59336	5.00032	4.86161	4.56177
ADIPOQ	3.18732	2.87092	2.51001	2.8763	4.06444	2.85281	3.92711	3.16163	3.05799	3.43143	2.81063	4.74259	2.38463	2.85537	3.01601	3.90659	2.53347	3.29162	4.17546	3.36006	3.79171	2.90552	2.97464	2.59241	3.11407	2.58281	3.04631	3.07308	4.52699	2.32233	3.11003	4.50071	2.40607	3.33285	2.74878	3.8712	3.20262	2.76599	4.78289	3.72974	2.8241	2.67813	3.95057	3.63681	4.70178	3.75661	4.05459	3.56962	2.84704
ADIPOR1	10.3981	10.3243	10.3105	10.9432	10.7603	11.0596	10.4582	10.8123	10.6716	11.1931	10.4841	10.4992	11.7353	11.0428	11.4849	10.153	10.3622	10.5242	10.2431	10.1219	10.6167	10.6711	11.4271	11.1322	10.7839	10.7786	11.4866	10.5425	10.6396	10.529	10.1921	10.7158	10.0747	10.3545	9.86036	10.6588	10.7185	10.7051	10.4638	10.372	10.5572	10.6913	10.6162	10.599	11.2464	10.7921	10.5484	10.5032	10.785
ADIPOR2	9.46684	9.44687	9.44111	9.43804	9.42151	9.59218	9.32328	9.32206	9.18886	9.57535	9.84131	9.27866	9.65478	9.49946	9.34473	9.34743	9.68346	9.40668	9.30958	9.65291	9.59403	9.67999	9.51656	9.44509	9.6958	9.63982	9.51276	9.45361	9.35401	9.9135	9.6916	9.25581	9.75345	9.62716	9.91367	9.46554	9.48621	9.50791	9.39574	9.65186	9.71582	9.34831	9.41673	9.45257	9.36782	9.58659	9.41869	9.46843	9.4467
ADIRF	4.51681	4.55216	4.20954	4.40464	4.4093	4.45113	4.40895	4.33287	5.07183	4.13408	4.19137	4.34001	3.88641	4.00288	4.3333	4.19047	4.3915	5.0625	4.25644	4.37408	4.14186	4.33557	4.12026	4.17293	4.45247	4.32725	4.81728	4.1775	4.03588	4.3565	3.8155	4.45872	4.09397	4.64742	4.20039	4.53405	4.51486	4.50219	4.27916	3.95654	4.59628	5.02699	4.29174	4.4729	4.30925	4.54726	4.30661	3.56182	4.27804
ADIRF-AS1	4.93219	4.51993	4.40314	4.38454	3.38639	4.58966	3.74622	3.2031	4.14174	4.36791	3.99884	3.84149	3.86434	4.09265	4.73475	3.2439	5.14075	4.0346	3.60847	3.9518	3.82711	5.4813	4.3668	4.19224	4.5299	4.38522	5.08663	4.45585	4.21401	3.6641	4.02594	3.79811	3.41126	4.00881	3.02511	3.94625	4.20849	3.84479	3.6409	4.26386	5.03374	4.11594	3.95966	5.08516	4.08298	3.94052	3.54263	3.02614	4.66306
ADK	7.01705	7.07637	7.60433	5.89239	6.40616	6.66773	6.6841	7.40802	5.85732	6.84398	7.36448	6.21386	7.84478	7.41707	7.40104	6.91377	6.65927	5.98786	6.42089	6.90662	6.37369	6.63736	7.36116	6.59422	7.71213	7.27402	7.17549	6.38532	6.3353	7.55476	7.1276	6.26502	7.49545	6.61296	7.59622	6.59279	6.3358	6.86362	5.99498	7.01607	7.40465	6.45547	6.52123	7.21515	5.67269	6.36688	6.70523	6.59189	7.95495
ADM	10.177	10.4008	10.0541	11.3253	11.0681	10.754	11.3111	11.2953	11.0074	10.2679	9.7958	10.7791	8.93686	10.9548	10.7187	9.92642	10.7495	10.6161	10.4539	10.6136	11.1244	9.46941	10.803	11.4323	10.669	11.2683	10.394	10.7474	11.4712	9.4381	10.2295	10.891	9.08334	10.2881	8.65867	11.3185	11.0277	10.8928	11.1518	10.3499	10.7274	11.2315	10.7662	11.2063	10.8539	10.6715	10.6525	10.6311	11.1507
ADM2	6.13714	5.60146	5.73533	6.01741	5.76687	5.8091	6.16876	6.06315	5.85928	5.85908	5.48175	6.23843	6.16184	6.04363	5.89805	6.25927	5.8602	5.85436	6.40529	6.06797	5.86826	6.05302	5.86135	5.90266	6.13654	6.14883	6.28818	6.1258	5.91822	6.17886	5.74502	6.50336	6.05224	5.63186	5.90913	6.31424	6.38937	6.20296	6.13974	6.25431	5.94786	6.17583	6.01863	5.74182	6.21527	5.54135	6.37066	6.04085	5.69372
ADM5	4.48771	4.39608	4.04176	4.37986	4.1159	4.25435	4.19155	4.26747	4.1245	4.03573	4.45297	4.66516	4.26452	4.38503	4.37783	4.22667	4.1897	4.63893	4.46546	4.25657	4.46302	4.14601	4.25435	4.43767	4.3935	4.37351	4.20212	4.13562	4.30573	4.51928	4.18481	4.19229	4.06832	4.20738	4.24348	4.25282	4.60583	4.0036	4.12743	4.44024	4.6024	4.49357	4.39101	3.78195	3.94597	4.25486	4.2046	4.17443	4.27663
ADNP	10.3294	10.3986	10.4058	10.1089	9.90848	10.2812	10.0377	9.92537	10.0852	10.3204	10.2022	9.99338	10.1872	10.023	9.96969	10.4461	10.0176	10.0155	10.1668	10.2595	10.2788	10.1405	10.2797	10.0352	10.2109	10.2293	10.1698	10.077	9.93908	10.475	10.4592	10.1505	10.4977	10.2603	10.4787	10.0046	9.97584	10.0224	9.93096	10.3959	10.3744	10.0751	9.90226	9.93101	10.1374	10.1224	9.93653	10.0983	10.1681
ADNP2	8.33408	8.36922	8.17921	7.7219	7.79335	8.20874	7.86158	7.92134	7.508	8.0573	8.23274	7.70751	8.41948	8.06237	7.875	8.34709	8.32301	7.95038	7.79406	8.13612	8.08891	8.02426	8.1413	8.27487	8.06428	8.09388	8.06635	8.04044	8.10728	8.44596	8.2899	7.76632	8.61754	8.06371	8.65883	8.06343	7.69006	8.02359	7.80455	8.37312	8.56777	8.16046	8.17079	7.7542	7.67698	8.07453	7.62615	8.38093	8.17522
ADO	9.03163	8.65876	8.69042	8.41762	8.66732	8.99225	8.34576	8.93778	8.59694	8.88803	8.8007	8.46965	9.44309	8.80926	8.48383	9.00918	9.2223	8.37373	8.84606	9.09456	9.02669	9.12478	8.91293	8.81721	9.02118	8.4886	8.6747	8.77065	8.73667	9.14566	9.1909	8.57547	9.5137	9.00117	9.67694	8.65511	8.70295	9.00245	8.44439	9.02088	8.38199	8.3766	8.57526	8.7762	7.75178	8.84301	8.34947	9.02504	9.33901
ADORA1	5.09588	4.93107	4.99227	5.35001	5.36928	5.05552	5.66796	5.18886	5.06955	4.98753	5.01883	5.43274	5.09549	5.22974	5.21941	5.36395	4.99984	5.54535	5.25279	5.01007	4.98329	4.94657	4.94841	5.088	5.13459	5.47651	5.51762	5.71812	5.22053	4.99406	5.03012	5.52535	4.89062	5.12246	5.86359	5.24546	5.51274	5.18191	5.11225	5.34581	4.87577	5.28116	5.15595	5.19083	5.19745	5.1056	5.48843	4.73379	5.13119
ADORA2A /// SPECC1L-ADORA2A	8.91371	9.03862	8.94308	9.74236	8.90943	8.74095	8.55595	9.28907	8.27079	8.89215	9.14421	8.4486	9.03301	9.28944	8.97079	8.40805	9.61833	8.46682	8.51817	8.85176	8.78936	8.97821	9.78611	8.26001	9.47015	9.43205	9.32797	8.95675	9.43131	9.33661	8.70957	8.87642	8.77984	9.08045	9.65544	9.10288	10.1577	9.90189	9.09427	9.11141	9.142	9.30593	9.10109	9.23426	8.37539	8.52124	9.18621	9.0448	9.4227
ADORA2A-AS1	3.66102	3.39834	3.56516	3.63329	3.88458	3.4076	3.78217	3.81685	3.48358	3.48697	3.50966	3.80099	3.53491	3.45906	3.62825	3.56141	3.41904	4.01219	3.53354	3.67573	3.58881	3.69037	3.39991	3.62644	3.61194	3.82423	3.8039	3.84483	3.66012	3.66734	3.42381	3.58217	3.5261	3.65929	3.41743	3.81495	3.71907	3.46171	3.90587	3.29025	3.49117	3.70283	3.44579	3.5459	3.75088	3.39201	3.55709	3.31879	3.44643
ADORA2B	5.09833	5.77542	5.94245	5.88454	5.63674	6.28891	5.17951	6.06153	5.6581	6.17342	6.99438	5.83887	6.34141	6.19079	6.02451	5.81932	6.44655	5.354	5.51937	5.95592	5.64962	6.13526	6.07121	6.40185	6.93347	6.6939	6.73881	5.76387	5.91285	7.50481	5.24516	5.78769	6.81272	4.89438	6.92286	5.93764	6.46431	7.01215	5.41751	4.3243	4.621	5.83897	5.4525	5.00006	5.00766	6.39774	6.2917	5.74711	5.7365
ADORA3	6.5076	5.93335	5.83012	7.63126	6.38033	7.96875	4.65914	5.7577	5.77952	5.40448	8.78752	6.07174	6.45017	6.59625	8.90615	4.56355	5.36247	5.65583	4.97828	7.31309	5.8102	8.48696	5.93731	6.73566	7.90913	6.67237	9.08221	8.2058	6.0595	8.54746	5.64053	6.53744	6.6142	6.7558	5.70437	5.68265	6.81991	8.32089	5.42916	5.09415	6.10391	8.90028	4.96358	8.00418	7.14145	7.9228	8.51457	4.74904	6.3625
ADPGK	9.26058	9.34062	9.24737	9.23998	8.97044	9.57225	9.28088	9.00332	9.37933	9.39427	9.18928	9.25863	9.43287	9.27009	9.26748	9.40171	9.33712	9.10333	9.17156	9.36829	9.67646	9.62559	9.18235	9.62614	9.56858	9.52934	9.60462	9.32417	9.15516	9.37324	9.29297	9.36055	9.52924	9.11744	9.28313	9.19113	9.31771	9.43692	9.40697	9.32833	9.54392	9.20497	8.78834	9.55088	9.31099	9.5806	8.90658	9.15394	9.20015
ADPRH	5.27523	5.29465	4.72509	4.10632	4.74865	6.20149	4.1454	4.8307	4.11551	4.56275	5.77873	4.92086	6.83852	5.05045	5.60994	5.37783	5.23049	4.05903	4.4395	5.90218	4.79599	5.56115	5.10882	5.92195	5.65045	5.31467	5.21115	5.4704	5.00057	6.96769	5.38616	4.48781	6.89121	4.80387	6.72412	4.61853	5.18466	6.25933	4.71084	4.52804	5.21403	5.11458	3.42072	6.02696	3.85928	5.89986	4.48905	3.9625	5.31465
ADPRHL1	3.8914	3.72645	3.79386	3.8811	3.54784	3.63216	3.45972	3.88309	3.48014	3.40511	3.90943	3.30979	3.8056	3.79318	3.99185	3.5823	3.8333	3.90876	3.68687	4.00037	3.84221	3.94722	3.88758	4.04011	3.89046	3.86203	4.04603	3.78451	4.36607	3.94673	3.56276	3.49328	3.82017	3.56803	4.13969	4.3033	4.1328	4.30375	3.38209	3.5272	4.012	4.75092	3.80864	3.85916	3.51626	3.88373	3.8544	3.76907	3.94009
ADPRHL2	9.73135	9.74097	9.25725	9.14057	9.84031	9.86178	9.52946	10.0274	9.13636	9.62005	10.0125	9.81874	10.0051	10.0732	9.99328	9.67602	9.70009	9.94461	9.74011	10.1466	9.50482	9.91308	9.6816	9.80472	10.1346	9.63361	9.64716	10.2555	9.73541	9.76582	9.81571	9.45899	10.14	9.42679	10.3105	9.93901	10.0858	10.1037	9.98081	9.26995	9.44899	10.1662	9.95378	10.6142	9.73079	9.92277	9.77543	9.66821	9.4223
ADPRM	8.45042	8.32667	8.07623	7.41958	7.80926	8.16672	7.76535	8.06672	7.61444	7.6331	8.11745	7.7207	8.38945	8.04545	8.14078	8.01654	7.9341	7.84922	7.54561	8.06614	7.68804	7.88281	7.958	8.24515	7.81735	7.79425	7.92331	7.94822	7.51603	8.52459	8.02317	7.32116	8.05859	7.66651	8.77603	7.48229	8.12635	8.56158	8.29842	7.86554	8.10239	8.0609	7.42072	7.78667	7.65536	7.76158	7.57397	8.29712	8.23486
ADRA1A	3.5015	3.27761	3.11924	3.54741	3.55206	3.44143	3.94766	3.54204	3.52438	3.47858	3.20101	3.28092	3.51788	3.51701	3.49207	3.12559	3.50652	3.64083	3.56557	3.47402	3.30636	3.62719	3.38603	3.48677	3.20869	3.49696	3.62267	3.78989	3.7216	3.50861	3.30315	3.58724	3.07082	3.54779	3.20244	3.29422	3.66893	3.8287	3.5301	3.44374	3.4906	3.73947	3.42776	3.54449	3.30393	3.68982	3.81291	3.66367	3.46049
ADRA1B	4.64257	4.65228	4.58848	4.08574	3.88325	4.46012	4.38376	3.83255	4.04234	4.21248	4.49015	4.16812	4.57148	4.9745	4.45172	4.12078	4.43755	4.03828	4.08623	4.61617	4.22269	4.4424	4.29954	3.97676	4.85822	4.40699	4.92983	4.35795	4.22364	4.82218	4.25644	3.44916	4.67142	4.4151	4.66895	3.98611	4.50713	4.59642	4.14765	4.39032	4.41226	4.7537	4.20201	4.15209	3.68388	4.08623	4.22707	3.58473	4.37266
ADRA1D	3.35325	3.07981	3.19342	2.94123	3.12326	3.18072	3.28003	2.97792	3.10375	2.90853	3.20272	3.20067	3.28277	3.41352	3.38224	2.98712	3.38107	3.3763	3.49859	3.11855	3.43062	3.30043	3.26602	3.22743	3.09276	3.29926	3.45612	3.30782	3.13921	3.27213	3.14015	3.18885	3.0601	3.46912	3.68884	3.34449	3.45495	3.55789	3.14132	3.01479	3.13959	3.2952	3.27044	3.34085	3.14184	2.98675	3.2452	3.00914	3.22221
ADRA2A	3.57824	3.75615	3.96658	3.49025	4.19752	5.30433	3.31017	3.52609	3.92011	3.93615	3.68079	4.53357	4.96046	5.05324	4.90992	3.28851	5.12606	4.85468	3.8066	3.98948	3.88734	4.66795	4.45966	4.66732	4.72081	4.71162	5.2496	2.91298	5.34232	5.4813	4.1381	3.56792	3.5152	4.18263	4.41756	4.66619	6.7325	5.62711	3.76714	3.54148	3.48735	4.48157	4.15347	4.11749	4.28322	3.28382	4.68777	3.37097	5.63732
ADRA2B	5.36458	5.24478	5.52955	5.57224	5.3243	5.46403	5.85301	5.52254	5.4082	5.23064	5.47077	5.35248	5.11842	5.4982	5.46551	5.37825	5.52153	5.6757	5.76797	5.176	5.32543	5.6903	5.34523	5.30568	5.27427	5.53769	5.8487	5.70464	5.24564	5.54737	5.24753	5.81489	4.84963	5.37267	5.379	6.01373	5.38884	5.62311	5.44697	5.30876	5.42093	5.69964	5.75962	5.32993	5.59552	5.55201	5.49302	5.39387	5.39015
ADRA2C	4.96254	4.76569	4.97419	4.94647	5.27359	5.15803	5.62299	5.25906	5.49153	5.06325	4.89891	5.59524	4.71119	5.19972	5.15589	5.31541	4.83917	5.69799	5.49393	5.07374	4.90837	4.86165	4.77443	4.76678	4.99097	5.32587	5.45422	5.10449	5.25787	4.80167	5.16229	5.50906	4.94449	5.33022	5.22485	5.36259	5.28692	5.66932	5.21004	5.32491	4.49908	5.11405	5.2455	5.30433	5.41388	5.32526	5.17454	5.02593	5.04039
ADRB1	2.96499	2.95927	2.90761	3.84421	3.34147	2.93693	3.20296	3.41957	3.35297	2.84779	3.37686	3.56532	2.92072	3.15478	3.09629	2.96877	2.9183	3.65441	3.73085	3.23846	3.23329	3.15264	3.00562	3.50334	2.92126	3.17413	3.2149	3.08166	2.9316	3.21286	3.25792	3.52387	3.15045	2.8733	3.29935	3.15341	3.57219	3.95485	2.99161	3.66439	3.10905	3.24284	3.76335	3.08139	3.5506	3.43427	3.36974	2.73506	3.21186
ADRB2	9.29963	9.43434	9.53568	9.39782	9.27249	9.27434	9.19735	9.94596	9.09642	10.1853	10.2993	8.53037	9.23556	9.58122	9.33437	9.2543	9.77085	8.86998	9.35492	10.0502	10.0108	10.0711	9.45332	9.05732	9.87363	9.42305	9.77668	9.85015	9.3547	9.61054	10.4458	8.98531	9.48639	10.204	9.69472	8.93792	9.68491	9.69592	9.44573	10.0981	10.1319	9.76581	9.85895	9.44254	8.86348	9.49549	9.4104	9.6764	9.33359
ADRB3	3.70153	3.91806	3.76502	3.89291	4.22217	3.81828	4.00616	3.80728	4.06042	3.6214	3.98906	3.97505	3.84493	4.03045	4.05518	3.68415	4.20667	4.26247	4.0758	3.69402	3.79787	4.14518	3.81732	3.98041	3.83041	4.09417	4.22392	4.13604	3.87127	3.81883	4.02273	4.04297	3.65623	4.04153	3.97115	4.12275	4.10551	4.09613	4.05293	3.69027	3.80775	4.23993	3.70372	3.68607	3.96747	4.04406	4.04491	3.69251	3.93683
ADRBK1	5.47307	5.41726	5.68516	5.80438	5.51952	5.42171	5.94477	5.62734	5.85759	5.76624	5.58978	5.97783	5.2929	5.72412	5.76666	5.31938	5.52153	5.49633	6.27612	5.56841	5.72063	5.47376	5.39746	5.58466	5.51134	5.59572	5.63538	5.84258	5.73569	5.33833	5.43125	5.76	5.36606	5.84187	5.38257	5.47407	5.88461	5.84707	5.56379	5.87821	5.52506	5.84171	5.46135	5.72112	6.26083	5.90981	5.7242	5.39849	5.69104
ADRBK2	7.7097	7.67371	7.38434	6.89923	7.06059	7.79447	7.77876	7.90331	7.11828	7.50554	7.87754	7.11128	8.71579	7.91553	7.80423	7.69439	7.55671	7.67347	7.56935	8.20451	7.69151	8.20442	7.47132	8.45531	8.11341	8.0068	8.0275	7.67518	7.5172	8.32578	7.53994	7.36927	8.62739	7.30298	8.76984	7.92003	7.4424	8.18106	7.18696	7.3327	7.88197	6.99865	6.95351	8.04485	6.49291	8.00469	7.62361	6.93574	7.96995
ADRM1	8.50367	8.48098	8.12889	8.44084	8.21798	8.42802	8.14175	8.51375	7.77303	8.19309	8.64659	8.09241	8.86149	8.39272	8.43875	8.0838	8.32825	8.35743	7.95938	8.33983	8.40105	8.34121	8.29553	8.42824	8.41435	8.32732	8.60997	8.37457	8.39529	8.64825	8.25151	7.74922	8.7953	8.16325	8.78551	8.62616	8.37492	8.70931	8.22762	8.1778	8.41322	8.46838	8.47456	8.38754	7.75719	8.24654	8.26027	8.45937	8.45836
ADSL	9.65228	9.70495	9.39951	8.86781	8.85206	9.54035	9.11113	9.39387	8.56016	9.24423	9.46189	9.28943	10.5355	9.26453	9.21998	9.46552	9.72223	9.24027	9.37368	9.71062	9.27917	9.26866	9.45821	9.36918	9.35859	9.18202	9.17368	8.91512	9.07514	10.0033	9.28674	9.04981	10.1906	9.23275	10.3475	9.3937	9.28392	9.32736	9.04731	9.26134	9.69601	9.03806	9.85285	9.08034	8.17761	8.99245	9.18084	9.53413	9.60913
ADSS	9.00207	8.8882	8.75775	8.72151	8.61604	9.00766	8.35748	8.78416	8.63312	9.02771	8.9919	8.76987	9.09532	8.9396	8.90733	8.81137	9.59955	8.77061	8.51211	8.90569	8.72985	8.64056	8.97496	8.6707	9.05254	9.09012	8.58521	9.13701	8.58977	10.0104	9.09145	8.64493	9.18972	8.7987	9.44956	8.76329	8.47939	8.66863	8.50374	9.11811	9.03583	8.74038	8.55003	8.60313	8.90425	8.9	8.37354	8.56054	8.92758
ADSSL1	4.49255	4.73665	4.76925	4.51703	4.52907	4.52489	4.45151	4.87172	4.57019	4.6877	4.87068	4.48712	5.28571	4.51697	4.53622	4.52363	4.52124	4.53029	5.33897	5.0382	4.98438	4.86902	4.85837	4.90444	4.85542	4.72336	5.0487	5.13781	4.68888	4.96326	4.35856	4.73569	4.84307	4.73668	5.36362	4.7241	4.68204	5.18306	4.64984	4.71332	4.81789	4.89276	4.60886	4.55968	4.39004	4.70582	4.48268	4.59869	5.01124
ADTRP	7.36369	7.2519	7.22657	5.81363	7.01231	7.58598	6.80412	6.67002	6.07296	7.00257	6.41066	7.3884	8.01295	6.1529	6.22545	7.11294	6.89928	6.43851	7.42787	7.6872	6.21129	6.96183	6.96228	5.98452	6.70116	7.02036	6.37498	5.89522	6.82644	7.29419	6.61168	6.84346	7.04917	5.78338	7.63108	6.54146	7.83732	7.38138	6.59532	7.05037	7.18051	6.60034	7.22304	7.08231	6.29215	6.01002	6.3914	7.45733	7.19264
AEBP1	6.86884	7.00163	6.55523	5.69663	6.6627	6.40079	6.37741	6.44474	6.62628	6.5916	6.58941	6.59498	6.25555	6.79746	6.94595	7.07435	6.24668	6.91221	6.33385	6.76626	6.29949	6.21206	6.93429	6.55622	6.1359	6.26931	6.13811	6.07138	6.12177	5.94465	6.29633	6.26614	6.36558	6.38902	6.7006	6.62187	6.89078	6.32211	6.09343	6.19449	6.36777	6.14185	6.87415	6.3886	6.35216	6.22643	6.56539	6.44297	6.57755
AEBP2	6.1924	6.09918	6.2214	6.27503	6.36927	6.00652	5.56411	6.42251	6.63302	6.55131	6.04059	5.78855	6.38262	5.7339	6.21868	6.80462	5.96901	6.50687	6.32691	6.34444	6.15452	6.54495	6.41181	6.08659	5.84731	6.40179	5.72968	6.01208	6.41036	6.33339	6.53718	6.1068	6.41363	6.94945	6.40909	6.31493	6.13781	6.17524	6.11215	6.20782	6.48581	5.48362	6.04883	5.87624	6.22578	6.20833	6.46887	6.67385	6.35236
AEN	8.2362	8.22351	7.78063	7.64468	7.58363	8.4247	7.4433	7.59567	7.21885	7.68294	7.64306	7.89007	8.10526	7.69551	7.91832	8.08877	7.94876	7.75123	7.73211	8.03386	7.74745	7.69943	8.12105	7.54774	7.88068	7.76945	7.50805	7.4743	7.53698	8.39273	8.14316	7.45218	8.47602	7.35565	8.47368	7.30336	7.48591	7.42775	7.57106	7.64295	7.98144	7.94844	7.7444	7.4499	7.17273	7.76604	7.81252	8.11059	8.13141
AES	9.94827	9.66299	9.45837	8.74905	8.71888	9.42684	8.90653	9.39385	8.24011	9.31152	9.69633	9.10796	9.98709	9.03307	8.96319	9.62041	9.11354	9.18867	8.78472	9.51869	9.2563	8.65273	9.74056	8.94687	9.29618	8.76836	8.64219	8.97874	8.93138	9.77887	9.77066	8.90714	9.99436	9.35085	10.3994	8.98513	8.71699	8.55775	8.80603	9.40809	9.80149	9.10637	9.77761	8.90551	7.94974	8.79737	9.20975	9.78285	9.65744
AF001548.5	9.44378	9.30398	8.92038	9.13523	10.5991	10.2878	9.60451	9.62899	10.0452	10.4324	9.11708	9.12067	7.74754	9.59794	9.65253	8.98555	9.51241	9.01533	8.74899	8.7961	9.10653	9.36856	9.50973	8.63768	10.2836	10.2829	9.72355	9.57649	9.56944	7.57882	9.93977	8.80571	8.00263	10.139	8.32083	8.95332	10.2734	10.1711	9.06612	9.87433	9.63698	10.4428	9.32581	10.1444	9.66768	10.571	9.93861	9.16491	10.3884
AF007147	8.81	8.82119	9.08426	9.13054	8.96429	8.9955	8.87828	8.60905	9.40283	8.70749	8.44318	8.49282	8.2338	9.31511	9.78259	8.71058	8.93966	8.80618	8.46734	8.57959	8.95629	9.85273	8.87387	8.78811	9.4664	8.96233	9.32271	9.74372	9.43352	8.12394	8.74189	8.59366	7.73552	9.04263	7.42359	8.77082	9.26627	8.54666	8.52916	8.84141	8.77929	9.73977	7.98959	9.38612	9.24964	8.74275	8.88285	8.98302	8.46908
AF067845.1	3.30631	3.0156	3.02237	3.48706	3.12679	2.86631	3.5372	3.15902	3.21479	2.92718	3.23602	2.75693	3.10131	3.14178	3.61821	3.4032	3.01987	2.98724	2.9885	3.1887	2.99492	3.35645	2.92718	3.07255	2.92025	2.91003	3.36561	3.43472	3.22724	3.14335	2.94688	3.10505	3.15715	3.08883	3.05299	3.19955	3.33738	3.14315	3.00344	3.2196	3.1035	3.41995	3.3897	3.07183	3.24332	2.74102	2.96637	3.38488	2.82617
AF070581	3.01178	3.48699	4.48818	5.24909	6.61113	3.08257	5.09124	3.87426	6.15708	5.83118	2.98239	4.718	3.2847	2.56649	3.06942	5.59879	3.26148	6.23877	6.41553	3.09316	4.73088	3.18661	3.08205	3.1342	3.29372	3.60905	3.27125	3.20249	3.50123	2.92014	5.37892	5.53655	3.11688	3.24419	3.24586	3.60528	3.0989	4.10891	4.87934	3.41333	2.7298	2.29763	3.63493	3.29339	6.21972	4.48342	3.90763	3.68729	3.55136
AF075036 /// OR7D2	4.87361	5.02456	4.43828	4.17157	4.38981	4.4317	4.31334	4.49165	4.78408	4.52562	4.78391	4.64687	4.79669	5.1382	4.92769	4.7737	4.76089	4.36716	4.72619	4.73334	4.19818	4.3197	4.39371	4.3072	5.00564	5.08485	4.49162	4.24599	4.58517	4.5043	4.76865	4.75925	4.41354	4.88025	4.49214	4.98731	4.61533	4.64095	4.37291	5.03313	4.30867	4.83247	5.04862	4.86252	4.62859	4.59377	4.761	4.58275	4.56074
AF086102 /// RP5-994D16.3	4.0288	4.44763	3.33404	2.71315	3.20745	3.89989	3.09937	3.1144	3.2397	2.72332	3.31857	3.07805	3.46905	3.82549	3.38024	3.09558	3.48678	3.33616	3.14848	3.4433	4.02619	2.94488	3.47765	2.59075	3.33174	4.06704	3.29507	4.59475	3.53266	3.61036	3.53299	2.98801	3.8917	3.51381	4.3805	3.28329	3.28056	3.11608	3.1478	2.99682	3.75089	4.11343	2.58952	3.15809	2.96472	3.02772	2.92607	3.10052	3.80414
AF086125 /// RP11-61A14.1	2.18883	2.50293	2.2143	2.33169	2.00553	2.34477	2.17197	1.89691	2.45426	2.2515	2.21734	2.28099	2.37259	2.07219	2.28087	2.13055	2.26934	2.06468	2.38223	2.16721	2.5084	2.23327	2.52463	2.1933	1.98471	2.27556	2.22518	2.29849	2.27556	3.60639	2.25786	2.15374	2.14981	2.18399	2.70012	2.66353	2.15107	2.70791	2.69342	2.3832	2.66762	2.2908	2.19353	2.2985	2.18957	2.33348	2.57936	2.46204	2.33699
AF086126 /// C16orf52	5.23762	5.18871	5.30434	5.40887	4.84383	5.49596	4.28349	5.47973	4.6053	5.42905	5.72795	4.56223	6.22468	5.27931	5.36609	5.23514	6.10097	5.34687	4.92562	5.30876	5.28081	5.94505	5.31316	5.77769	5.55765	5.30126	5.51051	5.68102	5.16628	6.64342	5.4994	4.63816	5.90237	4.86594	6.43012	5.49097	4.90354	6.34612	5.0321	5.19837	5.71871	5.31972	4.63318	5.35518	4.96362	5.82315	4.88032	5.24788	5.3697
AF086154 /// RP11-432J24.5	2.9288	3.0189	2.97079	2.71401	3.27053	3.61101	2.76621	3.12607	2.94416	2.54415	2.98099	3.04427	2.89352	2.62589	3.27504	3.21147	2.97079	3.54154	2.89317	2.872	3.26595	2.74944	3.32699	2.84043	3.29083	3.86034	2.95134	2.90349	3.02741	2.89374	2.91471	3.60942	2.4293	2.97004	2.9809	2.97623	3.39601	3.09349	3.24696	2.63811	3.09559	2.75449	3.06133	3.16214	3.18355	2.99196	3.21365	4.10339	3.73096
AF086184	3.20583	3.645	3.42637	2.90277	2.83453	3.20717	3.69833	3.42612	3.09194	3.05342	4.08435	3.34138	4.57885	4.01777	3.64812	3.62691	2.49728	3.95592	3.37235	3.02349	3.85805	3.25525	4.3668	2.68824	3.41968	3.84461	3.33759	3.84939	3.76412	4.81268	3.0927	4.20547	3.46296	3.18553	4.61427	3.81254	3.59058	3.75871	4.27845	4.04681	3.87729	3.54552	3.19245	2.70266	3.46277	2.39944	3.95747	3.53895	5.38952
AF086219 /// CTD-2647L4.1	3.75141	3.19322	3.43417	3.41472	3.0298	3.57618	3.63532	3.46425	3.6263	3.57514	3.43924	3.67525	3.38855	3.87442	3.63899	4.17734	3.20249	4.66301	3.74734	3.79274	3.79171	3.33316	3.32667	3.69226	3.20901	3.45247	3.98387	3.67014	3.38823	3.45726	3.36261	3.54923	3.80911	3.67336	3.54593	3.90083	3.62216	3.29205	3.43718	3.49643	3.41163	3.5887	4.00531	3.30217	3.41348	3.45303	4.04118	3.69468	3.00619
AF086288 /// RP11-768F21.1	4.55872	4.60891	4.31667	4.54704	5.1041	4.97123	4.47513	4.50294	4.51261	4.77311	4.3063	4.57923	4.34093	5.59111	5.23005	3.92212	5.03781	3.87689	4.83091	4.16762	4.03451	4.49388	5.28131	4.92235	5.19973	4.99634	5.46244	4.30235	5.24882	4.36909	4.55154	4.26119	4.65266	4.5349	4.36312	4.98583	5.43323	4.77851	4.55869	4.43609	4.59628	4.60461	4.0697	4.89752	4.67071	4.06514	4.60956	4.35833	6.22415
AF086294 /// RP11-485M7.3	3.25205	2.80666	2.76513	3.04647	3.17381	2.71845	2.94066	3.35033	3.25966	2.77083	2.8233	3.01589	2.72865	2.98475	2.88384	3.39079	2.7885	3.17669	3.4699	2.88977	3.3012	3.17741	2.57792	2.96824	3.0477	2.7925	3.30651	3.09905	3.28304	2.92005	3.09943	3.0813	2.60369	3.54734	2.79044	3.61186	3.36564	2.96814	3.15487	2.92005	2.79368	2.79156	2.92167	3.16417	3.05819	2.80139	3.20733	2.86401	3.20687
AF090939	3.42484	3.413	3.87388	3.72766	3.3754	3.26597	3.43747	3.65958	3.71796	3.50026	2.98301	3.63423	5.12665	3.30739	3.6198	3.81538	2.97993	4.49442	3.44756	3.78257	3.44927	3.0809	3.46761	3.58418	3.19627	3.55351	3.66924	3.40427	3.34457	3.62905	3.71863	3.84425	3.40789	3.98456	3.97234	3.63215	3.83458	3.31591	4.17757	3.83123	3.3539	2.94113	4.26552	3.38146	3.77566	3.47932	3.49906	4.17415	3.45817
AF131215.3 /// C8orf15	3.00119	2.79058	2.68374	3.79276	3.6251	3.06358	2.80249	3.22922	3.13384	3.13641	2.92707	3.09589	3.33985	3.26195	3.19731	3.38389	3.06334	3.40206	3.10558	3.27217	3.56216	3.28645	3.13468	3.11473	3.09725	3.29486	3.08899	3.54369	2.96237	3.06299	3.07977	3.24839	3.06425	3.52346	3.76418	3.05464	3.15276	2.82796	3.32264	3.48528	3.34624	3.71904	3.51045	3.03757	2.98725	3.49668	3.36551	3.06735	2.88963
AF131215.4	2.23812	2.31888	2.31314	2.72819	3.53809	2.60324	2.17234	2.74523	2.72001	2.3541	2.56398	2.38311	2.77037	2.67564	2.20278	3.28122	2.72601	2.27569	2.57794	2.61672	2.602	2.5629	2.77118	2.4239	2.42805	2.27049	2.50846	2.72819	2.26939	2.71327	2.64344	2.24175	2.30204	2.42947	2.6654	2.54631	2.20265	2.67633	2.39546	2.32558	2.59057	2.61031	2.89773	2.6212	2.92428	2.48118	2.87524	2.48769	2.88313
AF131215.8	3.35177	3.45453	3.51693	2.79028	3.50749	3.4895	3.17157	3.19035	3.36513	3.43105	3.31304	2.86873	2.7605	3.36296	3.05029	3.29609	3.14826	3.10223	2.79785	2.9216	3.4837	2.5472	3.90255	3.51955	2.81682	3.21791	3.26326	3.44629	3.10454	2.57148	3.0899	2.67878	3.0166	3.30149	2.54382	3.39884	2.73231	2.76027	3.14697	3.69584	3.06912	2.68306	3.44312	3.09909	3.08543	2.7646	2.95023	2.9159	2.98936
AF186192.1	4.15938	3.97893	4.17267	4.4119	4.20334	4.05723	4.3589	4.28916	4.3133	4.07667	3.94115	4.81036	4.03692	3.90757	4.32617	4.08833	4.24081	4.34512	4.17211	3.92439	4.07667	4.27865	3.8406	4.17293	4.23793	4.13136	4.34624	4.84093	4.24624	4.02454	3.89514	4.31778	3.93532	4.20056	4.07667	4.26022	4.51994	3.97405	4.1259	3.7563	4.33894	4.60758	4.50749	4.04144	4.25928	3.79233	4.75644	4.26907	4.04451
AF198444	2.94025	3.12904	2.86394	4.15551	4.71983	3.78539	3.82146	4.5974	3.14481	4.77922	4.49015	3.73649	2.16964	2.20232	2.58774	3.98065	3.28781	3.94998	5.04282	3.82487	3.44224	2.46545	2.83278	3.85465	3.37405	3.28824	4.02278	3.69322	4.12877	2.62206	3.19542	4.17362	2.00468	4.84809	3.1335	4.90295	4.47973	3.05471	3.98862	2.86048	3.38675	2.82797	5.46293	3.43642	3.7473	4.52315	5.52671	3.13601	3.53266
AF213884.2	4.52089	4.46163	4.51518	4.62216	4.41344	4.49089	4.40377	4.14894	4.44665	4.48133	4.1928	4.65248	4.46123	4.56463	4.53498	4.76717	4.13216	4.24391	4.31459	4.51861	4.60034	4.69913	4.43343	4.4788	4.56424	4.73759	4.96275	4.65528	4.30569	4.25351	4.36411	3.79857	4.8766	4.46554	4.6036	4.64529	4.65724	4.48626	4.32466	4.57998	4.03037	4.84661	4.24705	4.71978	3.80904	4.29143	4.71605	4.27063	4.72804
AF279780	3.69422	3.86707	2.79129	5.53365	6.60395	3.2657	5.23294	4.39057	6.08616	5.23416	3.10836	5.70916	3.13695	2.91258	3.62349	5.87197	3.53343	7.22866	5.51709	3.30531	4.49572	3.92719	2.88889	3.53271	3.39762	3.62469	3.77618	3.6925	4.03045	3.44176	5.03655	6.40176	3.21848	4.79155	3.32801	4.24874	4.01196	5.15508	5.55569	4.84254	2.80215	3.62941	5.09634	3.68193	4.84492	5.47554	3.67788	4.99828	3.0804
AF289551	6.42505	6.67534	5.84675	6.40184	6.30498	6.11564	6.14265	6.28292	6.21755	6.65238	6.8877	5.45654	5.5987	5.92357	5.84091	6.35937	6.01808	6.18685	6.06317	6.54486	6.49604	5.73029	5.95335	5.83422	6.41968	6.239	5.87088	6.13732	6.23391	5.6242	6.66855	6.17344	6.21842	6.53085	5.67884	5.98591	5.97748	5.71044	6.20403	6.4396	7.2826	6.13916	7.19662	6.24225	5.32866	6.12869	6.8688	6.28734	5.64091
AF520793	7.48113	8.14481	8.34854	7.67339	8.05509	7.96042	7.38939	7.82172	8.53775	8.07381	8.24867	8.2354	7.48275	8.48214	8.70918	8.22385	7.38413	7.48996	7.60054	7.94978	7.536	8.22044	8.08946	7.8579	8.72305	8.32893	8.0939	8.40675	8.08886	6.97408	7.66921	7.62611	7.25105	8.34005	6.85206	8.43233	8.22574	7.4152	7.4452	7.71659	8.14102	8.24805	7.64789	8.42377	8.86427	8.05147	7.87487	8.01365	7.85752
AFAP1	4.2104	4.34435	5.6418	5.62815	4.3603	4.15454	3.14993	4.16353	3.09587	4.38849	4.12705	2.89082	4.40258	3.78793	4.02829	4.07054	4.50947	3.76629	3.3543	4.10043	3.3788	4.98883	4.66317	4.23806	4.40925	4.68098	4.342	4.65726	4.01758	4.77107	3.81598	4.22916	4.09916	2.97937	4.94623	4.96566	4.46369	3.79517	4.04603	3.87878	4.259	3.62059	3.49104	3.56907	3.65832	2.18844	3.92212	4.23985	5.33318
AFAP1-AS1	4.79596	4.49912	5.09655	4.81316	5.32137	4.37387	4.54052	5.68894	4.29692	4.20972	4.51821	4.22522	4.1769	4.34586	4.71267	4.4366	4.56634	5.18111	4.5007	4.52221	4.285	4.74761	4.41324	4.73175	4.89487	4.78048	4.94692	4.69428	5.24831	4.25711	4.3035	4.79527	4.18529	4.69384	4.1449	5.81025	5.50061	4.64509	4.38999	4.33985	4.40182	4.71788	5.80903	5.10461	4.6218	3.91625	6.45064	5.22938	5.31519
AFAP1L1	3.45038	3.48849	3.7572	3.32518	3.49214	3.36388	3.70594	3.69441	3.59481	3.57608	3.51107	3.83214	3.60473	3.46217	3.70682	3.53634	3.38333	3.6266	3.5542	3.43037	3.749	3.72433	3.51519	3.69962	3.58801	3.48311	3.81902	3.75521	3.68228	3.52149	3.71398	3.72772	3.44423	3.634	3.44765	3.77663	3.8425	3.94455	3.65539	3.39811	3.54405	3.57235	3.95949	3.63469	3.40503	3.54303	3.74349	3.5315	3.62238
AFAP1L2	5.53561	6.03173	5.92491	5.75279	5.60725	5.60762	4.63107	5.26745	5.09392	5.67728	5.12446	5.32986	5.70402	5.28642	5.13632	5.56089	5.40572	4.8063	5.45691	5.53052	5.4257	4.93465	6.78524	5.69336	5.36058	5.43702	6.12392	4.25975	5.95399	4.99497	5.31972	4.61406	5.66405	5.41486	5.8538	4.99797	5.23276	5.02694	5.44433	4.92234	4.45627	4.90766	5.47728	4.7079	5.04362	5.06969	6.03162	5.48503	5.9156
AFF1	8.21361	8.13355	7.81336	8.68773	7.94934	7.98904	8.28481	8.49706	8.18965	7.3962	7.70761	7.13246	7.74643	8.52579	8.5887	7.84755	7.97415	8.43885	7.46719	8.41786	8.94421	8.52586	7.97457	8.76241	8.23267	8.0941	8.33073	8.36728	8.85701	7.74614	7.93319	7.04802	7.75338	7.76276	7.33237	8.91219	8.41519	8.31108	7.7303	7.7659	7.98747	8.38685	7.57147	9.02716	8.18457	7.92513	7.992	8.25365	7.92543
AFF2	2.91002	2.71392	3.03237	2.83177	2.90218	3.2702	3.52108	3.15508	3.0797	2.82494	2.94385	3.07023	2.8891	2.86355	2.83693	3.11167	3.58665	2.83782	3.42515	2.63315	2.91056	2.88392	2.98964	2.85826	2.87024	2.94105	3.14477	2.93341	2.9344	3.66546	2.72303	3.16274	2.67538	2.79557	2.76999	3.34121	3.54922	3.02196	3.00335	2.77611	2.90488	2.96303	3.13824	2.61221	2.74721	2.72578	3.0071	2.78681	2.86277
AFF3	4.21338	3.94581	4.19319	3.71287	3.96453	3.82433	3.65576	3.801	3.93559	4.18708	3.73705	3.87061	3.89278	3.86998	3.95442	3.87501	3.83813	3.63244	4.10585	3.97103	3.93575	3.41464	4.17625	3.98475	4.07555	4.16141	4.02175	3.65493	3.73074	4.18209	3.92988	3.84162	4.18798	4.16096	4.18632	3.89928	3.99089	3.93952	3.75128	4.10611	4.11728	4.06339	3.81446	3.69024	3.84843	3.72139	3.70184	3.80127	4.20831
AFF4	6.06325	6.44119	5.9461	6.20148	6.0994	5.93509	6.1696	5.63452	6.47876	5.955	5.86281	5.93084	5.32581	5.95981	5.4955	6.0187	6.09985	6.26695	5.83195	6.15463	5.76288	6.28526	6.12529	6.0994	6.00244	6.23691	5.74796	6.62476	5.75206	6.03512	5.92319	6.26258	6.08785	5.69167	5.97691	5.70129	6.37016	5.79835	6.25664	6.49635	5.6838	6.24662	5.67259	5.61926	5.7984	5.70782	5.63841	6.07409	5.65806
AFG3L1P	6.74102	6.78611	7.00688	6.07317	5.9012	6.69173	6.14597	6.16356	6.61846	6.52693	6.91572	6.27104	6.24544	6.45465	6.32787	6.08938	6.41012	6.2366	6.27102	6.55449	6.55798	6.51246	6.46384	6.35573	6.14827	6.46631	6.04739	6.17355	6.03228	6.49997	6.57235	6.02397	6.55582	6.27041	6.20267	6.37999	6.11749	5.37627	6.00906	6.2947	7.11968	5.9745	6.11637	6.111	5.46618	6.32585	6.17146	5.42572	6.34099
AFG3L2	7.39205	7.54434	6.98602	6.88628	6.7155	7.6037	6.69218	7.36826	6.44731	7.4365	7.79135	7.01216	8.27503	7.19487	7.23815	7.43725	7.46645	7.50111	7.1445	7.65588	7.3248	7.21161	7.47677	7.35892	7.38192	7.1727	7.19278	7.44606	7.21402	8.08209	7.26025	6.84039	8.10183	7.43487	8.26359	7.54109	7.18741	7.61707	6.93359	6.98847	7.62303	6.99422	7.32826	7.21856	5.85048	7.11236	7.24017	7.11661	7.6176
AFM	2.79426	3.06329	2.8516	3.50758	5.4833	3.06725	4.97991	3.50273	4.90285	4.18109	3.80236	4.25093	2.80686	2.86373	2.7442	4.60612	3.13723	4.79095	5.20248	2.96293	4.17495	3.38733	3.01868	3.31261	3.34596	2.6607	3.56116	2.90357	3.02741	3.1363	3.95527	5.83071	2.6607	3.29709	3.02085	2.79354	3.13333	2.98651	5.07652	3.86158	3.352	3.13815	4.58231	3.09381	5.56272	5.20376	4.45695	3.05671	2.89544
AFMID	4.93937	4.64616	4.74708	4.47513	4.62576	5.11799	4.63291	4.76292	4.78854	4.5524	4.7612	4.6568	4.87635	4.7129	4.79013	4.8145	4.78891	4.18229	5.03914	4.91106	4.75133	4.63638	4.85898	4.99373	4.04334	4.59128	4.54438	5.27511	4.80249	5.26152	4.66451	5.14286	5.08188	4.62686	4.81893	4.60168	4.5696	4.37815	4.91009	4.6497	4.84516	4.78373	5.11799	4.50647	4.86253	4.96248	4.74763	4.91564	4.11837
AFP	3.12776	3.34726	3.53457	4.11204	4.10792	3.60483	3.91188	3.38381	3.98674	3.09291	3.37024	4.38941	3.56784	3.4593	3.61835	3.99845	3.78019	3.42364	3.71792	3.25965	3.89074	3.8696	3.33085	3.2174	3.438	3.55952	3.90582	3.46406	3.16112	3.65606	3.44287	4.68203	3.15062	3.58004	3.36556	3.53888	3.68383	3.64684	3.96512	3.44708	3.25171	3.53723	3.5639	3.14696	4.37648	3.08792	3.52736	3.25942	3.57014
AFTPH	10.9706	10.9753	11.0197	11.0763	11.1431	11.0486	11.129	11.2525	11.1645	11.0557	11.1134	11.1356	10.9722	11.0684	11.0829	10.9407	11.0345	11.0582	10.952	11.0101	10.9385	11.0244	11.1237	11.0918	11.1333	11.1519	11.0578	11.214	11.1941	11.0068	10.9564	11.0837	10.8955	10.9959	10.9252	11.1232	11.1334	11.0935	11.0453	10.9185	10.9659	11.1042	10.9442	11.1279	11.095	11.0952	11.1209	11.0655	11.0781
AGA	8.49444	8.28236	8.10301	7.90851	7.73709	8.07842	7.75688	7.96637	7.56978	8.39563	8.93156	7.88319	9.01781	8.08914	7.81111	8.10292	8.60928	7.92364	8.26924	8.85791	8.26697	7.52031	8.36389	8.0834	8.62239	8.66062	8.18955	7.99494	8.1835	8.80924	8.7713	7.3854	9.04767	7.97099	9.12175	7.64486	8.10034	8.752	7.88306	8.72056	9.12601	8.49679	8.50642	8.21385	7.23359	7.69268	7.80846	8.52898	8.33525
AGAP1	4.38068	4.46607	4.1111	4.14127	4.31463	3.61041	4.50518	4.19853	4.42218	3.95105	5.24246	4.08238	4.85975	3.78005	3.99725	3.98354	4.0116	4.44107	3.7111	4.39836	5.00187	3.85654	3.52066	3.95601	4.34339	4.01621	4.02378	4.037	3.70055	4.99405	5.20908	3.98645	4.04379	3.99781	4.39671	3.60956	4.31243	3.95058	4.37328	4.75242	6.28329	4.17011	4.25928	4.00145	3.83216	4.3959	4.28373	4.83631	4.16511
AGAP10 /// AGAP11 /// AGAP4 /// AGAP5 /// AGAP9 /// BMS1P5 /// CTGLF12P /// LOC101060581	8.48242	8.53911	8.55557	7.18046	8.91936	7.88106	8.71733	8.83031	8.06466	8.35987	8.01675	7.87887	7.90037	8.67099	8.6976	8.02225	7.70622	8.70059	7.67871	8.16218	7.98836	8.47265	8.0976	7.76664	8.49638	8.64122	7.83798	8.22131	8.01892	6.9129	8.0061	7.59821	7.61405	8.53668	6.76988	7.95223	8.66282	8.20159	7.36574	7.97313	8.33568	7.96356	8.55712	8.54824	8.60671	8.89554	7.57822	8.22947	8.0501
AGAP11	3.89533	3.56723	3.73325	3.52264	3.79803	3.79296	3.4172	3.8525	3.93562	3.44478	3.75495	3.51337	3.56232	3.71657	3.65675	3.54248	3.80908	3.54819	3.65836	3.53706	3.58893	3.66037	3.44201	3.50103	3.44842	3.47381	3.66381	3.52822	3.71305	3.28934	3.35585	3.44192	3.48538	3.83318	3.44953	3.99503	3.74689	3.31543	3.54135	3.3359	3.35513	3.53926	4.57944	4.00123	3.70506	3.64388	4.06085	3.76554	3.58738
AGAP11 /// AGAP4 /// AGAP6 /// AGAP7P /// CTGLF12P /// LOC101060581	8.87127	8.93973	8.98395	7.68106	9.26578	8.19236	9.1382	9.22878	8.56799	8.76448	8.49564	8.41776	8.25739	9.03279	9.09284	8.4336	8.06096	9.1467	7.95473	8.36044	8.31276	8.86499	8.49315	7.99385	8.97856	9.00022	8.28801	8.59527	8.49973	7.21291	8.40089	8.14247	7.83844	8.9943	7.28096	8.39047	9.09776	8.64551	8.00588	8.31957	8.72242	8.3745	8.76293	9.05338	9.13225	9.16995	8.1059	8.63734	8.54094
AGAP2	6.95054	6.87829	7.07111	7.54057	6.35367	6.79246	6.59253	6.7248	6.71248	6.3978	7.04947	6.65654	6.46337	6.8669	6.99278	6.48524	7.15952	6.72522	6.43075	6.6246	7.00064	6.69262	6.78073	6.88667	6.53325	6.66182	7.12152	7.03218	6.82343	6.98741	6.70688	6.67268	6.53708	6.63734	6.72879	6.48762	6.8095	7.31945	6.54967	6.801	6.74499	7.35978	6.77448	6.97985	6.91814	6.87458	6.61458	6.96554	6.92094
AGAP2-AS1	4.32029	3.38209	3.83923	4.27182	3.99751	3.91929	4.50128	4.4452	4.26666	3.95834	3.91084	4.05011	4.38762	4.03079	4.52948	3.73479	4.32581	4.23597	3.59729	4.15246	4.43703	4.59623	4.23717	3.90556	3.94949	4.26727	4.40621	3.99417	3.89084	3.9833	4.01399	4.04479	4.01515	3.942	4.29682	4.34152	4.31579	4.57742	3.50458	3.96736	3.71297	4.36785	4.24718	4.40932	4.42555	3.474	4.02213	3.83191	4.13623
AGAP3	5.6978	5.34813	5.66428	5.71898	5.96003	5.58952	5.7432	5.83887	5.60047	5.28377	5.63677	5.7663	6.12921	5.97533	5.65248	5.77744	5.57882	5.39948	5.72764	5.64751	5.65766	5.88623	5.30757	5.70028	5.60507	5.56312	5.81307	5.73664	5.3629	5.89726	5.50637	5.63239	6.08079	5.96036	5.92863	5.76723	6.1276	5.85117	5.60936	5.22702	5.61863	6.09934	5.71464	5.77407	5.38503	5.59704	5.68909	5.39136	5.60993
AGAP4	5.194	5.07114	5.81565	4.98027	6.01128	3.96967	5.06749	5.28352	5.28643	4.91762	5.36322	4.67214	4.54255	5.51226	5.23476	5.61554	4.36132	5.26344	4.41282	5.07426	4.48509	5.17458	5.03104	4.52713	5.43025	5.29136	4.40703	5.16339	5.42309	3.7696	4.58395	5.16583	4.74757	5.37577	4.09185	5.36477	5.17267	3.88192	4.83488	4.6602	4.68401	4.30539	5.06315	5.30823	5.72148	5.19383	5.52936	5.55159	4.75409
AGAP6	6.75551	6.55487	6.4611	6.28275	6.34602	6.51779	6.48646	6.02013	6.23064	6.06666	6.01691	6.7192	5.75485	5.99283	5.78547	6.18201	6.30363	5.79045	5.85998	6.21568	6.28081	6.37036	6.03766	6.23685	5.68656	6.07404	6.01443	5.75838	6.07096	5.88778	6.40493	7.01966	6.28118	6.34243	5.73083	5.75445	5.94797	6.18095	6.68635	6.6959	6.6715	6.06747	7.08545	5.89945	5.71884	6.14702	6.47027	6.4082	6.16165
AGAP6 /// AGAP9 /// BMS1P5	3.87574	4.05114	3.88744	3.00299	2.84363	3.97148	3.13497	3.19039	2.88998	2.62553	3.5006	3.62079	3.98038	3.4622	3.61063	3.41755	3.58204	3.53851	3.54667	3.43617	2.47359	3.56783	3.70594	3.47607	3.3788	3.34209	3.3022	3.77212	3.56726	3.84242	4.17157	3.34196	4.12618	2.73135	3.37279	3.51947	3.2945	3.91032	3.56686	3.74312	3.53945	3.56218	3.55174	2.9227	3.39467	3.53477	2.98725	3.56458	3.32426
AGAP9	6.09983	5.9784	6.26584	6.15801	7.60867	5.81443	6.53659	7.20999	6.24852	5.97829	5.25213	6.56706	5.45756	5.51292	5.78808	7.24142	5.70579	5.64188	5.82066	6.04116	5.95962	6.06581	5.56833	5.66518	5.8302	5.31175	5.0161	6.08329	6.72063	5.44271	5.8363	6.73045	5.60852	6.4365	5.04455	6.62271	6.56324	5.1103	6.5168	6.11328	5.76394	5.78387	8.38193	5.96253	5.94524	5.49222	8.12886	7.01813	5.60354
AGBL1	2.89108	3.02309	2.8627	3.64401	4.2395	3.17377	6.09534	3.75929	3.46306	4.71131	2.318	5.44603	2.40365	2.40218	3.07945	4.14722	3.19565	5.06757	5.80586	3.35252	4.03263	3.28648	2.77566	3.03585	3.20353	2.97916	3.11643	3.23982	3.68729	2.86798	4.01659	6.54654	2.55903	3.6149	2.87787	3.59137	3.54901	3.54494	5.682	5.49182	2.71606	2.9417	5.00942	3.49741	5.83751	4.86087	4.41273	4.40362	3.0379
AGBL2	5.37463	4.92136	4.5682	4.24232	4.12388	4.8155	4.41126	4.36221	4.58288	4.84999	5.20975	4.29962	3.86368	5.1993	5.25915	4.49017	4.31163	4.02453	4.55521	5.23704	4.37235	4.23341	5.40156	4.21894	4.49264	3.75707	3.86664	4.46775	4.46335	4.1355	4.79136	4.2739	4.52913	4.42681	4.35246	4.56094	4.00832	4.41121	4.48363	4.74582	5.33825	4.23118	4.73726	4.0927	4.04094	4.89882	4.51377	4.92418	5.08633
AGBL3	3.44565	3.52854	3.10218	4.54384	4.78928	3.99135	4.65901	5.00196	5.71655	5.33984	2.91087	5.03425	3.32181	3.97588	3.52236	5.28337	3.39505	4.68588	4.85417	4.1728	4.13905	4.23156	3.91035	3.41131	2.81473	3.4074	3.70723	3.2853	3.99769	3.15843	4.77983	5.20616	2.77396	5.1724	3.05407	4.23749	3.61917	4.16491	4.97975	4.6107	3.55117	3.24221	4.90845	4.01828	4.20351	4.17968	3.66473	4.33787	3.62458
AGBL4	3.76439	3.32304	3.39114	3.46226	3.38408	3.34567	4.32629	3.51888	3.43582	3.60602	3.23789	4.37166	3.32111	3.46972	3.22715	3.34404	3.05312	3.48115	4.2525	3.24641	3.82187	2.99275	3.09234	3.0705	3.51686	3.4745	3.67134	3.39737	3.50144	3.234	3.52932	4.50451	2.97245	3.27285	3.44659	3.38973	3.54922	3.28013	4.03129	3.69848	3.31851	3.46204	4.10991	3.30674	4.31534	3.90267	3.57185	3.2797	3.22185
AGBL5	5.74099	5.74359	5.64671	5.36599	5.06813	5.53845	4.50777	5.30108	3.91156	5.30182	5.81578	4.48474	5.95795	5.64402	5.89422	4.7532	6.23885	4.7583	3.73454	5.17329	5.16025	5.42538	5.85055	5.75583	5.78131	5.74115	5.94223	5.13383	5.26755	6.00487	5.20608	4.29	5.84951	4.85126	6.11527	5.21632	5.61929	5.46106	5.21566	4.50988	5.78756	5.25613	5.14331	5.14988	4.9362	4.32004	5.08816	5.13847	6.09341
AGER	8.51371	8.76689	8.60723	8.41043	8.21537	8.86617	8.63678	8.46612	9.28913	8.27169	8.54326	8.0452	6.44757	8.51981	8.88024	8.27756	8.40653	8.52732	8.03268	8.36764	8.39804	8.57274	8.8356	8.41567	8.4107	8.82534	8.60927	8.75611	9.11881	6.50258	7.82585	8.04384	6.9968	8.67713	6.39077	8.09799	8.5311	8.36145	8.32769	7.90112	8.49498	8.67888	8.00255	8.61103	8.53444	8.26075	8.48893	8.18951	8.33377
AGFG1	8.20436	8.58544	8.79612	9.05484	7.28444	8.72356	7.17296	7.76659	7.72088	8.23555	8.40616	7.46292	8.70289	8.28406	8.91968	7.927	8.31783	8.00684	7.59728	7.94993	8.26118	8.63352	8.26001	8.99933	8.81372	8.87106	9.13096	8.67375	8.11615	9.33647	8.13231	7.56745	8.50614	8.07543	8.71922	8.26195	8.69425	9.0773	7.28685	8.29026	8.72845	8.71263	7.54051	8.31185	8.48601	7.99094	7.97764	7.85636	8.04709
AGFG2	4.84017	4.60264	4.71105	4.44808	4.46414	4.39037	4.35974	4.61118	4.24822	4.53951	4.5459	4.52144	4.41962	4.48217	4.55244	4.42216	4.37155	4.62158	4.55523	4.83589	4.66452	4.74763	4.39133	4.40461	4.75095	4.50186	4.64931	4.37812	4.80786	4.47183	4.5218	4.44245	4.86249	4.90126	4.86494	4.36187	4.77611	4.42783	4.68736	4.99724	4.532	4.60921	4.66428	4.79458	4.26659	4.62833	4.72026	4.62115	4.59949
AGGF1	7.69644	7.4487	7.25354	7.44193	7.43436	7.23505	7.29699	7.37031	7.38619	7.42913	7.65245	7.28883	7.16706	7.12763	7.02607	7.49203	7.14313	7.80595	7.62788	7.43935	7.42541	7.37777	7.2495	7.27711	7.31459	7.51811	7.40955	7.17558	7.05296	7.60952	7.3186	7.17791	7.39942	7.22873	7.5872	7.16225	7.22129	7.64816	7.50996	7.54527	7.29807	7.30236	7.32722	7.43477	7.39725	7.57073	7.53141	7.35482	7.28406
AGK	8.34975	8.14116	7.86386	7.30714	7.37805	8.0926	7.02296	7.56806	7.26116	8.24256	7.98657	7.36025	8.39097	7.60092	7.06036	8.20142	7.6797	7.34941	8.20065	8.22473	7.83385	7.5242	8.07429	7.46574	7.66059	7.3696	7.3203	7.4307	7.51177	8.40656	8.39428	6.93491	8.57809	7.65996	8.61757	7.36896	7.28042	7.21538	7.55922	7.9629	8.31101	7.85688	8.32223	7.35295	6.81664	7.54678	7.42083	8.32491	7.63787
AGL	8.47035	8.31765	8.86575	8.67611	7.85129	8.28892	7.38657	8.23687	7.64644	8.1724	8.97949	7.89643	8.44838	8.30891	8.42581	8.55934	8.88438	7.89441	7.54268	8.37285	8.15348	8.17285	8.66321	8.05789	8.36938	8.29389	8.19634	8.12348	8.14416	9.01314	8.43178	7.48982	8.45907	7.95165	8.51831	8.03543	8.04547	8.18565	7.32157	8.36717	8.61368	8.01027	8.14657	8.07695	7.99936	7.92132	7.59895	8.44786	8.31555
AGMAT	5.7319	5.66952	5.16055	4.86373	4.48537	5.32285	4.35544	4.76235	4.15664	4.63252	4.84137	4.70011	6.08732	5.36301	5.28601	5.14509	5.18471	4.14885	4.98199	5.67671	5.05351	4.80476	5.29033	5.32026	4.95901	4.41772	4.90669	4.59601	4.50402	5.49102	4.34481	4.32782	5.89198	3.97352	6.45265	4.95321	4.98426	5.12273	4.13603	4.27684	5.29046	5.00123	4.92811	4.77851	4.2633	4.00592	4.10395	5.07015	5.6219
AGO1	6.89321	7.21542	7.42232	6.78191	6.83454	7.35229	7.13584	6.73301	7.2742	7.15013	7.17709	6.48705	6.77668	7.03234	7.2321	6.63741	7.24976	6.77285	6.44901	6.90749	7.13157	7.05358	7.12115	7.14866	7.19757	7.27163	7.37471	7.23111	7.33394	6.93291	7.02037	6.66392	6.95946	6.89024	7.24885	6.80856	6.7953	6.68074	6.44484	6.86099	7.08713	7.01394	6.42636	7.00924	6.83661	7.09762	6.11299	6.75509	7.19467
AGO2	7.93168	7.85462	7.89086	8.30343	7.96296	8.18987	8.36021	8.85842	8.63422	7.9275	8.03624	7.7298	8.69836	8.68534	9.27078	7.48184	7.86969	7.91727	6.95938	8.21309	8.27351	8.2959	8.09068	8.32963	8.75298	8.75288	8.73124	8.29264	8.57311	7.902	7.39767	7.80047	7.85839	7.86165	7.62219	8.077	8.11824	8.33519	7.20455	7.56242	8.27402	8.58651	7.46652	8.1832	8.61706	8.35751	8.34654	7.71131	8.504
AGO2 /// CASC7 /// CASC7	7.41592	7.33877	7.42339	6.8243	7.46296	7.53343	7.71061	7.04607	7.51804	7.38854	7.36909	6.75511	7.74211	7.52581	7.67446	6.71235	7.15809	6.63174	6.82767	7.10309	7.66486	7.378	7.53247	7.3875	7.47185	7.50559	7.68025	7.11022	7.15615	6.61237	6.99777	6.89299	7.31863	6.99695	6.91453	7.02465	6.86074	7.37828	6.87122	6.89723	7.48589	7.23766	6.73478	7.38319	7.75855	7.1491	6.81933	6.5029	7.18236
AGO2 /// CASC7 /// CASC7 /// DQ574852	6.96923	6.86736	7.08906	6.51264	6.70499	7.56863	7.4931	7.08654	7.72807	7.74663	6.54131	6.79224	9.13227	7.15833	7.3797	7.19762	7.11759	6.87763	6.21078	6.43075	6.9027	7.37922	7.86299	7.31017	7.45227	7.3157	7.95752	7.0612	7.66002	6.78548	6.84186	6.86381	7.13556	6.52263	7.1626	6.89108	7.02342	6.72243	6.90129	6.801	6.67229	7.33542	6.51622	6.92163	7.32026	6.90173	6.74818	6.97423	7.25481
AGO3	7.02828	7.20927	7.27724	6.78606	6.91298	6.87	6.79598	7.00443	6.9394	7.21516	7.14627	7.0579	6.95937	6.82595	6.87415	7.45951	6.86822	6.95267	6.8583	7.36947	6.72764	7.1028	6.98032	6.78956	7.04906	7.00129	6.78313	7.0386	7.13612	6.54564	7.0081	6.58825	6.86353	7.10241	6.867	7.17786	6.99448	6.85222	6.46171	7.12892	7.21485	6.89344	6.57554	7.14452	7.26358	6.86425	6.51631	6.84568	6.39803
AGO4	9.37339	9.43545	9.7582	10.4328	9.37482	9.63053	9.70966	9.21566	9.94746	9.4665	9.66752	9.39403	8.73978	9.70223	9.538	8.83937	9.52907	9.37619	9.23706	9.08675	9.82113	9.83582	9.27242	9.74371	9.88971	10.2408	10.4092	9.76054	9.50277	9.4278	9.38228	9.59697	8.78768	9.49152	8.90855	9.33485	9.5297	9.90048	9.45298	9.62115	9.54909	9.79607	8.88862	9.53134	10.2537	9.91717	9.23187	9.03829	9.80826
AGPAT1	7.559	7.48	7.52291	7.76569	8.12242	8.29012	7.18742	7.87185	7.6852	7.68547	8.09766	7.68722	8.09891	8.0364	8.28542	7.22422	8.19054	8.20876	6.85203	7.48663	7.2912	7.81688	8.04786	8.03766	8.41362	8.10793	8.26691	8.11429	8.23495	7.67209	7.31142	6.92735	7.72907	8.05946	8.06188	8.38593	8.55756	8.4827	8.06631	7.37831	7.81311	7.96314	7.26218	8.07317	7.69955	7.98362	8.39824	7.83057	8.38698
AGPAT2	7.18086	6.97579	7.13092	7.81253	7.11297	7.10934	7.17228	7.24189	7.18848	7.12906	7.5499	7.2936	7.42201	7.48958	7.62486	7.06937	7.58805	7.49465	7.10672	7.15249	7.36876	7.34243	7.10459	7.61858	7.50249	7.4547	7.89912	7.52433	7.40386	7.74988	7.1742	6.90401	7.24798	7.24068	7.21638	7.34731	7.55499	7.74482	7.21782	7.1101	7.0797	7.77995	7.17468	7.55638	7.27585	7.44541	7.31136	6.85012	7.36356
AGPAT3	7.30281	7.25934	7.28219	6.81626	6.3807	7.56496	7.15105	7.46999	6.37012	7.09559	7.32275	7.22668	8.36899	7.14457	7.4107	7.10028	7.23282	7.29875	7.13091	7.51125	7.45451	7.40051	7.43503	7.70651	7.75742	7.44142	7.33303	7.18553	7.51555	7.74714	7.28481	6.7991	8.06893	7.23905	8.42357	7.49956	7.45952	7.59805	6.91318	7.05746	7.32265	6.63159	7.30713	7.60389	6.00901	6.93232	6.90168	7.05384	7.11385
AGPAT4	6.51377	6.69001	6.348	6.96216	5.14547	6.97009	5.85745	7.03426	5.93131	6.45462	6.47356	5.54836	6.77843	6.70585	6.58413	6.72173	6.43999	6.57419	5.93661	6.80775	6.96695	6.53332	6.405	6.94886	6.93409	7.12474	6.56868	7.31726	6.32866	7.09483	7.20374	5.58432	7.115	6.85032	7.14302	6.48977	5.97291	6.01065	6.38865	7.11549	7.09711	6.57827	5.87131	6.64509	5.74188	6.73372	6.48255	6.66692	6.60334
AGPAT4-IT1	5.30253	5.64137	5.38768	5.84942	5.41168	5.50863	5.28332	5.60356	5.72761	5.26863	5.11553	4.6131	5.94223	5.93493	5.75316	5.61208	5.3722	5.91353	5.60747	5.83378	5.89322	5.7034	5.3688	6.07284	5.92073	5.35166	5.45643	5.98781	5.96698	6.12071	5.92807	4.61949	6.43605	5.52969	5.50412	5.81831	5.17627	5.06029	5.67789	5.64198	6.03734	5.99964	5.93862	5.75458	5.63942	5.31405	5.63149	5.69856	4.94952
AGPAT5	7.41569	7.5556	7.32857	5.74739	6.86241	7.45167	5.574	6.68818	6.23076	6.95861	7.26745	6.51905	7.59527	6.8158	6.99289	7.80077	6.73679	6.76698	6.63903	7.34545	6.97048	6.80905	7.62808	7.03652	7.14363	6.96866	6.35297	5.98665	5.83174	7.27409	7.37833	6.50371	7.93182	6.89484	8.03818	6.56584	6.2568	6.68171	6.45805	7.07404	7.10744	6.48801	6.45284	6.85217	5.80762	6.36474	6.04679	7.1387	7.54537
AGPAT6	6.04314	5.81373	5.95441	5.94962	4.60739	5.70721	4.60546	4.83072	4.37018	5.95056	5.89203	5.36253	6.0095	5.46602	5.6917	5.14718	5.18858	5.46799	5.23179	5.65344	5.90752	5.17741	5.78004	5.57003	5.71609	5.79356	5.45377	4.82916	5.75697	5.81848	5.63283	5.19288	5.7567	4.93461	5.90741	4.79563	5.32391	5.30617	4.3558	5.31071	6.24107	5.91164	4.44059	5.28716	4.99858	5.12327	4.48195	5.67562	5.96151
AGPAT9	10.59	10.7735	11.5704	11.996	11.2092	11.1728	11.3863	11.2272	11.0595	11.1757	10.8976	11.3778	10.6735	11.707	11.4361	10.6215	11.4311	11.2242	10.7176	10.5389	11.2695	11.7923	11.3458	11.3	11.5718	11.7273	12.1341	11.9058	11.6041	11.267	10.6991	11.3639	10.4046	11.0077	10.7769	11.621	12.07	11.9982	11.2647	11.6988	11.2553	11.8129	10.91	11.8366	11.6847	11.7456	11.4494	10.8887	11.4519
AGPS	8.18293	8.15292	7.84923	8.04374	7.9638	8.11748	7.6742	7.90869	7.78826	8.25133	8.42831	7.843	8.67424	8.03209	7.76874	8.17285	9.07923	7.72141	8.57975	8.38263	8.12847	8.59864	7.9409	8.45772	8.14757	8.10839	7.65803	8.05164	7.69155	9.43168	8.67094	7.77046	9.04008	8.11049	8.7101	7.97929	7.83464	8.42831	8.01133	8.12705	8.11829	7.80853	7.37856	7.9802	6.63839	8.42921	7.78545	7.58219	8.0149
AGR2	2.7928	2.77968	2.53917	2.58128	3.10182	2.80034	3.35785	2.71893	2.92247	2.78458	2.65891	3.15676	2.61359	2.77824	2.7556	2.85869	2.85572	3.45009	3.22682	2.61576	2.46184	2.90255	2.67932	2.90371	2.80054	2.92543	2.78709	2.65057	2.75077	2.75027	2.58989	3.65942	2.72654	3.05077	2.71833	2.88252	3.17785	2.77561	3.10222	2.98863	2.64674	2.90433	2.89976	2.66067	2.92283	2.78193	3.21025	2.64087	2.68118
AGR3	2.03366	1.72456	2.51231	1.76307	2.23342	2.05237	2.32685	2.23549	2.02834	1.99855	2.10334	2.34509	1.87518	1.94607	1.86377	2.3141	2.18847	2.05948	1.94735	1.75783	1.81874	2.07381	2.23182	2.03153	2.0544	2.06546	2.1134	2.29577	2.32078	2.22791	1.93529	2.41884	2.16715	1.83494	2.24098	2.26354	2.16352	2.05948	2.00992	2.17164	2.33752	2.17852	2.23974	1.76286	1.8221	2.26526	2.54841	2.14706	1.95022
AGRN	6.58943	6.55537	5.44998	5.70025	6.33491	6.83205	6.47174	6.6821	6.1257	5.71854	6.27191	6.47304	6.0492	6.70071	6.83605	6.44445	6.26377	6.73208	6.32003	6.60879	5.97706	6.38234	6.2792	6.47971	5.83306	5.96467	5.98299	6.80096	6.38927	6.39845	6.30923	5.54397	6.51047	6.69515	6.31647	6.686	6.62491	6.75609	6.36619	5.73755	6.04336	6.82212	6.07849	6.79491	6.64522	6.50622	6.55996	6.45767	5.86739
AGRP	4.775	4.37116	4.97419	4.80106	4.57839	4.75254	4.54878	4.75852	4.79967	4.28253	4.51602	4.70566	4.54769	5.12846	5.0558	4.62818	4.56934	4.77018	4.42604	4.61277	4.68281	4.58434	4.60349	4.60671	4.78257	4.82299	4.84026	4.50176	5.26167	4.43707	4.42962	4.91739	4.61689	4.90316	5.22822	4.74784	5.03399	5.18044	4.779	4.80775	4.71243	5.10871	4.49156	4.71603	4.61136	4.6454	4.86792	4.24029	4.59198
AGT	2.7957	2.89773	2.95312	3.17295	2.99561	2.66943	3.08391	3.0143	3.4292	3.06929	3.02847	2.8925	2.89483	2.84318	2.81778	2.59925	2.92699	3.39885	3.19069	2.72023	3.07085	3.09823	2.91388	3.43456	2.97079	3.13231	3.10287	3.14079	3.02472	2.73009	2.92818	3.18752	2.56673	2.99228	2.93413	3.23803	3.09922	3.37831	2.84192	2.84413	2.59671	3.16742	2.97985	2.82349	3.0882	3.1121	2.94324	3.1919	2.94079
AGTPBP1	9.08141	8.99751	9.45367	10.4738	9.02959	9.11562	9.44291	9.33331	9.45652	9.48971	9.63978	8.94065	9.24945	9.47571	9.46849	9.02656	9.5114	9.09088	8.7104	9.03532	9.55939	9.62319	9.13251	9.60926	9.88677	10.0084	9.93135	9.54524	9.41956	9.50779	9.0661	9.38378	8.8298	9.3178	9.20196	9.72648	9.59179	9.65066	9.06874	9.61168	9.68227	9.62384	8.78692	9.36444	10.0435	9.44336	9.04222	8.90227	9.41523
AGTR1	3.00712	3.40131	2.93976	3.73583	4.13073	3.1623	5.42074	3.77047	4.08763	4.27016	2.98443	4.97055	3.0965	3.17497	3.54365	3.76837	2.88176	4.10158	5.60398	3.31226	4.06759	3.45167	3.3507	3.33956	3.29417	3.34523	3.35902	3.68407	3.65873	3.23343	3.81083	5.84728	2.83049	4.18773	3.16895	4.11231	3.27858	3.38958	5.73521	4.30572	2.79509	3.60463	5.10282	3.56848	5.4958	4.12381	4.56609	4.0301	3.49105
AGTR2	2.53661	2.53191	2.29001	2.54674	2.92305	2.77736	2.77154	2.47022	2.84017	2.79443	2.5775	3.14046	2.648	2.40546	2.53034	2.54129	2.75057	3.08488	3.95816	2.38022	3.16492	2.70633	2.4239	2.57064	2.47688	2.52	2.93186	2.51739	2.52027	2.74966	2.52475	2.99261	2.40765	2.55915	2.42994	2.63981	2.97994	2.77909	2.57488	2.63751	2.52301	2.41928	2.38865	2.52518	2.95122	2.96825	2.39932	2.40091	2.71156
AGTRAP	8.94088	8.82176	8.87336	9.40143	9.04992	9.29046	9.4436	9.49124	9.05613	8.56994	9.19891	9.07221	9.34474	9.56991	9.55481	8.52514	9.60914	9.13347	8.84806	8.88745	9.61565	9.52114	9.23225	9.31442	9.69254	9.35639	9.90796	9.54468	9.60995	9.6784	8.53555	8.72624	9.0561	8.99459	9.41649	9.31107	9.66616	10.2388	9.51593	8.89847	9.14176	10.0323	8.36545	9.70063	9.44251	9.69306	9.29696	8.71029	9.46641
AGXT	3.52822	3.68551	3.59502	3.60227	3.62102	3.63177	3.83584	3.80308	3.87836	3.58269	3.59308	3.6768	3.38236	3.72002	3.54846	3.50469	3.67485	3.45827	3.68587	3.32059	3.18607	3.50522	3.58416	3.61472	3.83053	3.80042	4.39836	4.00633	3.34688	3.59747	3.31784	3.06074	3.30951	3.79561	3.82024	3.40774	3.66903	4.39342	3.69058	3.12032	3.8233	4.06078	4.07043	3.35456	3.4082	3.04426	4.10521	3.57154	3.58416
AGXT2	2.35796	2.3331	2.55703	2.20631	3.04292	2.45897	2.79665	2.37485	2.41474	2.79579	2.36779	2.43068	2.41918	2.87711	2.30312	2.45485	2.46231	2.39617	2.94769	2.3656	2.27014	2.37093	2.42728	2.33574	2.30316	2.20324	2.49895	2.6869	2.05875	2.34578	2.53974	2.56098	2.22988	2.28979	2.48873	2.42216	2.79258	3.07017	2.51955	2.54493	2.52301	2.10333	2.72397	2.15442	2.59342	2.12745	2.46207	2.73544	1.84509
AHCTF1	9.50853	9.50423	9.90233	9.87693	10.0228	9.60642	10.0457	9.95112	9.72911	9.66615	9.43033	9.68335	8.64912	9.82288	9.86861	9.30996	9.63664	9.87485	9.08102	9.27214	9.46391	9.84079	9.75204	9.60405	9.98225	10.0163	9.85667	9.94581	10.0846	8.53626	9.51461	9.47903	8.58656	9.7171	8.53053	9.64174	10.006	9.87907	9.61617	9.70054	9.6829	10.088	9.45683	9.83638	9.95633	9.93768	9.62152	9.51337	9.89153
AHCTF1 /// AHCTF1P1	4.57935	5.09724	5.19644	5.69352	5.80664	4.70478	5.42807	5.66463	6.29014	5.21133	4.41709	5.1214	3.58274	5.47304	4.66649	5.06503	4.65101	5.21345	4.86943	5.49909	5.50747	5.25782	4.86756	5.38143	5.254	5.38379	5.44644	5.55526	5.24713	3.70273	5.49981	6.24153	4.54689	5.91461	4.48089	5.48408	5.14615	5.38285	5.34361	5.20885	5.01429	4.85897	5.9148	5.13915	5.66134	5.35028	5.82125	5.46836	5.13403
AHCY	7.91019	7.8443	7.83506	7.81498	7.14941	7.74811	7.02553	7.65136	6.97111	7.73395	7.73691	7.60144	9.20293	7.68652	7.75749	7.79325	8.20923	7.67314	7.79975	8.18844	7.89088	7.87843	7.64815	7.99056	8.01635	7.63763	7.72937	7.87324	7.44676	8.62033	7.86253	7.19525	8.87629	7.72984	9.00733	7.90164	7.68757	8.16143	7.38639	7.78333	7.80094	7.51199	7.89249	7.38427	6.61275	7.68321	7.28666	7.57502	8.12055
AHCYL1	9.05477	9.08741	9.34485	9.24208	8.62714	9.12407	8.77388	8.69923	8.89993	9.13591	9.21433	8.65476	9.30308	8.88231	8.79131	9.07178	9.07369	8.72644	8.84967	9.06377	9.29407	9.29975	8.87168	9.39671	9.2919	9.3116	9.31879	9.02517	8.78434	9.45816	9.13046	8.84108	9.54222	8.9428	9.51173	9.04644	8.77881	9.23278	8.78743	9.07293	9.21392	8.79541	8.41877	8.90106	8.9163	9.16385	8.78236	8.85509	9.20649
AHCYL2	5.83875	6.17551	6.32383	5.84652	5.78911	6.10487	5.52773	5.94994	5.77637	6.03618	6.37265	5.61149	6.41315	6.10135	6.23412	6.20493	6.02467	5.6387	6.09108	6.20642	6.21056	6.55314	6.12539	6.16929	6.44128	6.44265	6.16291	6.05633	5.81144	6.62169	6.21748	5.7949	6.64501	5.96999	6.5259	5.70206	5.83408	5.61653	5.76556	5.66052	6.09609	5.45726	4.97945	6.05402	5.54694	6.10027	4.9827	5.55044	5.84905
AHDC1	5.51321	5.23744	5.39052	5.00779	5.44382	5.29262	4.39183	5.50332	5.06262	5.2697	5.24386	5.08632	5.48479	5.34164	5.62502	5.3741	5.3217	5.25661	5.19024	5.41539	5.37081	5.35068	5.50772	5.39534	5.48267	5.52934	5.46367	5.57623	5.54014	5.47295	5.36597	5.15214	5.47368	5.48055	5.67444	5.42227	5.4163	5.53577	4.67117	5.0674	5.30494	5.55554	5.31615	5.44474	4.94416	5.2228	5.31214	4.79966	5.29913
AHI1	4.64316	5.09941	4.26934	4.0694	4.02021	4.04486	5.02297	3.91417	4.10876	4.6949	4.1632	4.84127	3.27974	4.20974	3.7826	4.78892	4.69114	4.8199	4.73598	4.23788	4.76495	3.78872	4.53523	3.99534	4.09053	3.69722	4.31837	3.92964	3.78335	4.29045	4.19382	5.01797	5.0001	3.61073	3.69255	4.51193	4.47636	3.61747	4.88574	4.27914	3.33673	4.32904	4.50721	4.30109	4.54993	4.95128	4.46173	4.84136	4.06227
AHNAK	6.88273	6.64962	6.81794	5.86476	6.01532	6.82582	6.01022	6.42138	5.86414	6.36222	6.33394	5.29035	7.48412	6.529	6.22454	7.12429	6.51541	6.81468	6.11471	6.76659	6.65881	6.85909	6.20176	7.0455	6.81938	6.80875	6.51879	6.00049	6.17646	7.58042	6.99031	5.33923	7.64385	6.47816	7.62702	6.70507	6.15215	6.56663	6.02564	6.60848	7.0518	6.27733	5.92464	6.44689	5.57038	6.45589	6.36997	6.69311	6.55504
AHNAK2	3.80018	4.03772	3.9013	3.42559	3.36886	3.7098	3.55046	3.89812	3.38727	3.85027	4.15796	3.62875	3.98007	3.90059	3.32898	3.94721	3.24781	3.57596	4.32364	4.1421	3.71211	3.73211	4.16654	3.9343	3.7582	4.02029	3.82524	3.59755	3.42713	3.65457	3.86952	3.55021	4.09269	3.55152	4.34974	3.8277	3.93553	4.05072	3.43543	3.30986	3.90828	3.53248	3.77704	3.92531	3.27477	3.74472	4.22734	3.02106	3.98109
AHR	8.41959	8.70445	8.715	8.3273	8.27422	9.14049	8.66899	8.77199	9.07222	8.65053	9.51536	8.40849	9.78673	8.563	8.67485	8.88133	8.60634	8.61409	8.64297	8.93499	8.77218	9.49785	8.09779	9.30162	8.99786	9.27439	9.4016	9.07843	8.71524	9.90658	8.80525	8.3691	9.50604	8.99599	9.43029	9.06798	8.01996	8.56378	8.10944	8.62925	8.60484	8.41086	7.73949	8.98779	8.57293	9.06138	8.89333	7.73052	8.87114
AHRR	2.77429	3.2714	3.55329	3.30495	3.33332	3.1603	3.19877	3.05234	2.98523	3.15534	3.22605	3.10258	3.16689	3.32379	3.36599	2.39214	3.41717	3.7543	3.25377	2.96341	2.87017	3.15158	3.87412	3.54193	2.87326	3.33112	3.37212	3.38899	3.65155	3.02375	3.23106	3.23603	2.85591	2.95694	2.89357	3.63215	3.4205	3.47058	3.21816	2.88898	3.70972	4.30598	3.522	3.82773	2.95223	3.41944	3.65554	3.07949	3.83639
AHSA1	9.53378	9.45038	9.31905	9.14825	9.14432	9.30742	8.9088	9.13705	8.81256	9.29249	9.36175	9.21455	9.91701	9.13759	9.30427	9.26721	9.29445	9.15326	9.11272	9.73639	9.43075	9.20124	9.29748	9.32182	9.47789	9.21518	9.19191	9.29393	9.14212	9.71591	9.44659	9.07629	9.96877	9.31902	10.1143	9.42931	9.35307	9.46524	8.98192	9.22449	9.38457	9.3169	9.71567	9.32873	8.58708	9.06802	9.38727	9.48038	9.52525
AHSA2	9.0796	9.29956	9.49366	8.51622	8.94326	8.96982	8.95804	8.71071	9.13005	9.22573	9.26983	8.6163	7.53602	9.2302	9.33386	9.45497	8.77859	9.00801	9.22015	9.15929	8.80791	9.21804	8.99268	8.8035	8.79145	9.22645	8.81499	8.75099	8.52363	7.11653	9.0649	8.73838	7.92085	9.20876	7.26628	8.48821	8.693	8.0846	8.75442	9.25605	9.9203	8.60213	8.84022	9.07264	9.37689	9.10983	8.28957	8.84988	8.5016
AHSG	3.21299	3.35424	3.33588	3.55133	3.93512	3.1612	3.36582	3.69711	3.40444	3.53607	3.39473	3.39853	3.23794	3.48243	3.41108	3.72573	3.27165	3.19701	3.57473	3.09874	3.3878	3.29833	3.15734	3.28196	3.38279	3.54248	3.58872	3.28098	3.18888	3.43442	3.13605	3.63018	3.27879	3.51771	3.18826	3.18724	3.45412	3.61323	3.59115	3.41664	3.29666	3.42794	3.70265	3.17573	3.40669	3.47151	3.30522	3.10709	3.71314
AHSP	7.05724	7.12613	4.75936	6.2479	3.88901	7.37802	4.1859	6.77261	4.07995	8.57363	5.07425	5.54198	12.0933	8.02289	9.24397	3.45023	5.98996	4.6965	4.86704	5.73532	5.78305	6.17936	11.3889	8.87768	5.97006	6.04428	9.49309	5.91816	5.08975	8.94147	4.75873	4.30082	7.36758	3.87195	4.7992	4.26078	4.96495	4.57742	3.89575	4.29381	5.02577	6.20662	7.4134	5.23921	6.24221	5.62189	4.43007	7.84476	5.43141
AICDA	3.40713	3.27893	3.40359	3.99044	3.16688	3.11186	3.88517	3.85063	3.31772	3.41833	4.25066	3.78193	3.51931	3.65851	3.87301	3.39572	3.59887	3.17394	3.11068	3.29814	3.19799	3.78379	6.04125	3.37162	3.96815	3.21807	4.02194	3.37603	3.35128	3.72619	3.51344	3.4572	4.38666	3.37539	4.24751	3.44853	3.19823	3.91835	3.88096	3.50012	3.25838	3.90136	3.78892	3.46692	3.41882	3.96795	4.00038	3.54004	3.87106
AIDA	9.72313	9.69622	9.27989	8.85027	9.41531	9.63349	9.14565	9.45143	8.98261	9.52446	9.36741	9.25409	10.0977	9.30354	9.10382	9.59835	9.3293	8.78482	9.2451	9.63257	9.24855	9.30602	10.1042	9.5954	9.35865	9.23483	9.3818	9.16473	9.20891	9.77756	9.8162	9.04833	10.0744	9.35336	10.1249	9.34648	9.17164	9.57909	9.34553	9.40327	9.54589	9.32549	9.12955	9.44069	8.94995	9.2228	9.3552	9.88724	9.66292
AIF1	12.7693	12.608	12.7467	12.4503	12.5614	12.7202	12.6586	12.7824	12.686	12.8873	12.634	12.5543	13.0524	12.8553	12.8567	12.5776	12.5924	12.5815	12.6715	12.8538	13.0712	12.9879	12.3342	13.07	13.023	13.0445	12.9703	12.7302	12.3738	12.8219	12.5999	12.8154	12.9796	12.683	12.9749	12.8995	12.7694	12.9266	12.6944	12.7212	12.8121	12.5619	12.5432	12.7923	12.3017	12.9155	12.475	11.9236	12.8939
AIF1L	3.73229	3.72608	3.25832	3.90467	3.70167	3.4941	3.44017	3.74638	3.52291	3.40721	3.56246	3.71792	3.90416	3.86262	3.72336	3.70362	3.42009	3.5721	3.89131	3.63936	3.72135	3.50408	3.64812	4.05848	3.86009	3.87508	3.72276	3.98756	4.1672	4.02695	3.33175	3.65592	3.72692	3.50493	4.00613	3.37386	3.9741	3.81533	3.51392	3.49582	3.31389	4.00983	3.60903	3.44491	3.66961	3.26169	4.12367	3.47212	3.72078
AIFM1	8.29638	8.25714	7.97915	7.79867	7.74422	8.12584	8.11583	8.01069	7.43759	7.7771	8.09332	7.93976	8.81915	8.06294	7.87278	8.1883	8.24152	7.65073	7.91264	8.53693	8.15983	8.04615	8.26616	8.10895	7.95597	7.92524	7.85216	8.05076	7.80287	8.89367	8.39057	8.10254	8.98032	8.02652	9.03476	8.12934	8.14471	8.2743	8.09269	8.22166	8.30802	8.03062	8.38463	7.90031	7.00636	7.99135	8.30941	8.34439	8.18202
AIFM2	6.04636	5.76938	5.89122	5.61995	5.18081	5.94505	5.34243	5.70329	5.19077	5.7003	5.61963	5.27752	5.8971	5.78202	5.50258	5.715	5.58917	5.43393	5.43327	5.3423	5.96936	5.41245	6.08753	5.47389	5.4415	5.42941	5.51307	5.43853	5.63232	6.1952	5.83946	5.04429	6.3743	5.40079	5.88445	5.4849	5.45391	5.787	5.34249	5.42107	5.85439	6.01537	5.3605	5.52202	5.30373	5.28582	5.67032	5.86785	6.01009
AIFM3	5.0589	5.47007	5.10808	4.46996	4.44166	5.12553	4.66142	5.0648	4.71421	4.83589	5.64191	4.42888	5.33607	5.33189	5.57153	5.20411	5.07669	4.87869	4.30187	5.76676	4.68848	5.56377	4.8829	5.7327	5.42972	5.30002	4.99029	5.51097	5.12572	5.3409	4.79593	4.5691	5.4226	4.95231	5.63557	5.56063	4.69377	5.31819	4.45454	4.71896	5.73875	5.21723	4.94434	5.3262	4.89973	4.84115	5.26503	3.73571	4.99865
AIG1	5.06882	5.64287	5.28431	6.68003	5.65294	6.11711	5.2311	5.95704	4.83233	5.52638	4.76883	5.49141	5.81224	5.92246	5.35937	4.41433	6.03124	4.78199	4.81209	4.764	5.52006	5.76089	6.58712	5.82704	5.99026	6.32782	6.61585	5.30451	6.03361	5.84951	5.26411	4.74198	4.26737	5.6854	5.73002	5.37065	6.74156	6.05089	5.14018	5.25561	5.23624	5.6621	4.42048	5.61503	5.61312	5.37874	5.75805	5.64565	6.76497
AIM1	11.0611	11.136	11.2557	11.2484	11.0091	11.2292	11.1097	11.177	10.9669	11.003	10.5567	11.1574	10.8062	10.9483	10.9808	11.0026	11.3185	10.8497	10.9071	10.8818	11.0983	11.3072	11.1576	11.1437	11.2568	11.1285	11.4574	11.4351	11.3049	11.2798	11.1741	10.9962	11.2186	11.1155	11.0435	10.9736	11.384	11.2972	11.0548	11.1549	11.0839	11.3555	10.7997	11.2537	10.9544	11.1833	11.0394	11.1616	11.2827
AIM1L	4.44282	4.59788	4.70753	4.95672	4.17574	4.68073	4.28303	4.33826	4.47036	4.04596	4.58564	4.28632	4.16227	4.78843	4.59826	4.2915	4.58172	4.32975	3.66067	4.0896	4.16439	4.69098	4.46601	4.35081	4.47239	4.72506	4.99143	5.28681	4.31299	4.78266	4.31015	4.07195	4.34022	4.09117	4.37575	4.69147	4.85705	4.91566	4.33103	3.95275	4.56865	5.2089	4.015	4.95134	4.29012	4.60359	4.45873	4.24206	4.52985
AIM2	10.1265	10.2846	9.12405	10.9989	10.7351	11.3268	11.2844	11.531	10.5061	9.30575	9.52433	10.6481	9.1943	11.2822	11.3062	9.69335	10.928	10.4626	10.4199	10.4365	11.5805	11.1062	10.671	11.4918	10.3547	10.339	10.865	11.2923	11.6497	9.58582	10.3732	10.1309	10.3416	10.4939	9.5155	11.2675	11.3103	11.4751	11.7021	9.79196	9.73995	11.9493	10.6431	11.7414	10.4047	10.059	11.2575	10.9766	10.4402
AIMP1	9.66094	9.57306	9.30114	8.73926	8.64088	9.56932	9.01423	9.17347	9.06008	9.22737	9.27621	9.30461	10.0349	9.02669	8.96619	9.62345	9.40053	9.11819	8.77732	8.99805	8.84298	9.33808	9.18909	9.43998	9.07677	8.86121	8.91625	9.06961	8.8658	9.99201	9.50247	8.98878	9.68219	9.35102	10.1707	9.03533	8.92266	9.12022	9.1588	9.32584	9.52053	8.66342	9.28125	9.13602	8.87895	9.34956	8.86371	9.43828	9.31658
AIMP2	8.87943	8.71471	8.49936	8.31264	8.39083	8.98238	8.13898	8.55487	8.13082	8.54283	8.70826	8.39829	9.55678	8.50964	8.67656	8.39177	8.53669	8.32295	8.4611	8.88344	8.71192	8.76652	8.72745	8.84119	8.86397	8.49826	8.72885	8.83968	8.44856	9.43298	8.78692	8.10285	9.37863	8.57357	9.44105	8.31607	8.77562	8.92926	8.3844	8.40289	8.70096	8.76134	8.63632	8.47298	7.65213	8.71092	8.43442	8.79429	8.76332
AIP	9.37875	9.16259	9.11757	8.72532	8.36989	9.02562	8.41277	8.92249	8.122	8.87463	9.29642	8.47166	9.66185	8.87299	8.86899	8.82129	9.07685	8.97365	8.93643	9.20388	9.06578	8.86008	9.17416	8.89922	9.15443	8.93702	8.92167	8.795	8.74269	9.34217	9.11671	8.60527	9.66123	8.99011	10.1405	8.87997	8.92576	9.3506	8.72757	9.0554	9.24383	8.90624	8.97315	8.76518	8.22256	8.79361	8.6796	9.33333	9.42803
AIPL1	4.10773	3.82245	3.93321	4.39629	4.24838	3.96569	4.17253	4.18736	4.13019	3.81099	3.8966	4.06422	4.03629	4.05875	3.89318	4.16322	4.01992	4.40907	4.25939	3.92108	4.23017	3.99525	4.17551	4.01837	4.01399	3.98366	4.15381	4.07212	4.08955	4.16824	3.97238	4.27693	3.79462	3.90534	4.04502	4.08917	4.27348	4.32139	4.15064	3.84533	3.78052	4.19691	4.19383	3.84678	4.07468	4.11308	4.33218	3.93192	3.89065
AIRE	4.52427	4.34342	4.61415	4.60178	4.30632	4.74304	4.4811	4.74244	3.89186	4.22364	4.36999	4.50345	5.00747	4.65962	4.38175	4.10386	4.57649	4.70285	4.54297	4.4728	4.7785	4.50744	4.63095	4.22944	4.376	4.66496	4.50621	4.48825	4.93418	4.77915	4.50651	3.93949	4.82896	4.62107	4.61912	4.73019	4.74909	4.95455	4.1443	4.71817	4.59204	4.91428	4.7414	4.436	4.45737	4.16676	4.96097	4.68447	4.66158
AJ011981 /// DPY19L1	3.83255	4.25625	3.99601	4.44469	5.98172	3.60507	4.86439	4.26596	5.61919	5.5876	4.36999	5.12807	4.39296	3.95148	3.62368	5.59956	4.24301	5.11571	5.1906	4.39836	4.30213	4.24376	3.49162	3.93516	3.7974	4.10086	3.97305	4.29861	4.05858	4.23832	5.36597	5.45311	3.7551	4.22621	3.74939	4.37439	3.89587	4.50364	5.40419	4.66215	4.00313	4.02024	4.80201	4.23321	5.22256	4.90036	4.16825	4.36044	3.98048
AJ420595 /// GOPC	7.22601	7.61413	7.94686	7.16623	7.38701	7.26907	8.11226	6.8012	8.14048	7.95685	7.12331	7.88315	6.32051	6.99146	6.95385	8.13455	6.67773	6.81506	8.02977	7.34375	7.54567	7.37492	7.01543	7.27204	6.51881	6.97792	6.53015	6.40389	7.1394	5.97043	7.63898	8.37165	6.92433	7.56694	6.085	7.3749	6.46384	6.61062	7.77349	8.04963	7.49149	6.66539	7.3938	7.00292	7.76414	7.45763	6.70954	7.27091	6.40749
AJ606316 /// LOC644135	3.78413	3.92633	3.2977	2.43391	3.05495	3.55079	2.6063	2.40964	2.82389	2.96803	4.1244	2.62946	4.35305	2.89252	2.48797	3.54274	3.01517	2.84528	2.88433	2.90531	3.26794	2.74129	3.17196	2.64939	3.09436	2.78096	2.5891	2.11662	2.05214	3.89903	3.68745	2.59587	3.96252	2.55915	4.82661	2.596	3.00054	2.28387	3.06984	2.981	3.70784	2.45775	3.12536	3.1928	3.049	2.92312	2.79474	2.88841	3.66983
AJAP1	2.94129	2.86713	2.97653	2.63811	2.55268	2.92251	2.69267	2.82623	2.63617	2.55558	4.70895	2.3988	2.82334	3.16759	2.74161	2.4212	2.70863	2.96489	2.8715	3.04162	2.66391	2.92091	2.60649	2.94447	2.86666	3.00732	3.24558	2.98637	2.64398	2.72027	2.81395	2.97426	2.82375	2.75388	2.89843	2.80695	3.05606	3.13552	2.8977	2.62352	2.78103	2.92731	2.8984	2.90934	2.76168	2.99341	2.65247	2.82596	2.87085
AJUBA	2.88906	2.61589	2.75305	2.65774	2.89688	2.87735	2.64799	2.71112	2.96107	2.82355	2.77615	2.28113	2.97713	2.72209	3.0977	2.66499	2.68752	2.46634	2.63267	2.75128	2.70717	3.06692	2.84849	2.54482	2.41641	2.8388	2.67431	2.8372	2.63194	2.88006	2.61119	2.62899	2.74947	2.84517	3.067	2.69243	2.76314	2.7915	2.68465	2.60026	2.96206	2.74002	2.77961	2.90896	2.32392	2.63103	2.91486	2.83948	2.87165
AK000798	2.7254	2.72208	2.95312	2.78379	2.43958	2.45436	2.48853	2.91733	2.25672	2.35591	2.85187	2.30646	2.86451	2.74008	2.44236	2.4008	2.2208	3.13744	2.09448	2.82141	2.46886	2.60087	2.48527	2.37155	2.78573	2.59019	2.3684	2.82105	2.8524	2.59796	2.81026	2.08918	2.36584	2.49991	2.7495	2.78837	2.98725	2.47392	2.36633	2.41024	2.83418	2.33824	2.96275	2.55519	2.02235	2.47596	2.65554	2.89331	3.13912
AK021537	4.80834	4.894	4.97419	4.77851	5.3155	4.39126	6.37321	5.25437	4.27703	4.88002	4.63371	5.85024	3.8487	4.63481	4.42377	4.9389	4.38118	5.32182	5.90562	4.91076	4.43851	4.62816	4.41709	4.45498	4.67856	4.70067	4.45309	5.56184	5.44985	4.3225	4.88007	5.19616	4.513	5.64601	4.60002	5.43594	5.24527	4.90613	6.25644	5.19279	4.43991	4.80029	6.0194	4.67585	5.60326	4.66385	5.67079	5.06821	4.24851
AK021804	4.48959	4.51111	3.51349	6.53714	7.90695	2.95262	6.10527	5.22119	7.34344	7.05944	2.98982	6.45826	3.05562	3.16414	3.54056	6.604	3.32443	7.96531	7.18373	3.25602	5.39039	4.26922	3.68773	3.82689	4.05599	3.14854	4.12404	4.06123	3.935	2.97426	5.67858	6.76832	2.77813	4.10701	2.94823	4.4947	3.89222	4.59905	6.16026	5.22478	3.80501	3.6954	5.69027	3.54157	7.05197	6.66448	5.10342	4.8596	4.40781
AK021933	2.43133	2.66884	2.95377	3.08105	3.04705	2.85668	2.91338	2.93358	2.80866	2.68402	2.74703	2.96952	2.73364	2.67909	2.83455	3.09064	2.78204	3.09829	2.64053	2.96022	2.59436	3.10452	2.76818	2.71038	2.91572	2.87927	2.56933	2.73843	2.5865	2.96453	2.68591	2.93039	2.56148	2.7368	3.14563	3.0241	3.13098	3.19995	2.87633	2.8098	2.64837	2.8987	2.6109	2.95004	2.5546	2.311	2.80689	2.64707	2.57981
AK021977	2.78581	3.22776	2.9737	4.23864	5.67176	3.12609	4.61966	4.5622	5.28908	5.01241	2.93855	4.58472	2.74304	2.97079	3.07924	4.5913	3.16501	5.29671	5.89622	3.39334	3.80488	3.64822	2.90585	3.12014	3.133	3.06148	3.0537	3.45638	3.56555	2.77772	5.26738	5.09889	3.02497	3.45439	2.97399	3.33719	4.48151	4.05446	5.22812	4.48723	3.45904	3.14846	3.78859	3.44438	5.57364	5.05706	4.44436	4.21597	3.51747
AK022030 /// TROVE2	10.4472	10.4902	10.4821	10.2167	10.0553	10.2912	10.158	10.2876	10.3298	10.3342	10.3491	10.0456	10.1208	10.1405	10.0929	10.3779	10.357	10.1563	10.0593	10.2619	10.1799	10.2022	10.4219	10.2055	10.2323	10.2063	9.98538	10.1537	10.2892	10.4833	10.6061	10.0599	10.446	10.2613	10.4481	10.2419	10.013	9.93156	10.1891	10.3523	10.5255	10.2542	10.1549	10.2481	10.113	10.1408	9.94985	10.4173	10.3092
AK022793 /// BC043213 /// CTB-175P5.4	3.28622	2.91194	2.9154	3.19826	3.31301	2.65861	4.60485	3.73631	3.53147	3.02326	3.3088	4.9413	3.10879	3.08968	3.43106	3.95679	3.65733	3.08302	5.42313	3.10068	4.09422	3.12847	3.17562	2.68338	3.12345	2.95524	3.08778	2.81956	3.3465	3.11042	3.44593	5.69268	2.78518	3.44027	3.04403	2.99845	3.49787	3.98053	5.39812	4.12912	3.10038	3.3279	4.16292	3.15955	5.04299	4.24841	3.84897	2.9771	3.64646
AK023627 /// TCTE3	5.76399	5.80649	6.37686	5.18285	5.80075	5.94745	5.03956	5.20747	6.19202	6.09309	5.62116	4.45244	4.72908	5.89726	6.12948	6.1599	6.52204	5.58757	6.15394	5.58254	5.66554	5.518	6.47627	5.51867	5.85075	5.14052	4.46926	5.22281	5.76523	4.46812	5.77287	5.75766	5.41628	5.50944	4.04687	5.38445	5.72044	4.75176	6.20082	6.47909	5.69644	5.20794	5.1439	5.69837	4.80345	4.63341	5.08207	5.8196	5.95148
AK024119 /// CTC-378H22.2	5.37794	5.19213	4.99308	4.38559	4.69723	5.29157	4.30489	4.51134	4.02296	5.00122	5.33484	4.52618	6.43579	4.87104	4.98061	4.69431	4.90786	4.79793	4.12187	4.92093	4.29806	4.33788	4.95804	5.0604	4.89796	4.76285	4.14924	4.36495	4.36586	5.72652	4.94808	4.36155	5.31099	4.86741	5.95758	4.61015	4.4045	4.64455	4.24977	4.62626	5.87746	4.46229	4.08029	4.54827	4.21724	4.48418	4.07347	4.64488	5.09316
AK024134 /// PPM1H	4.53215	4.40831	4.23696	5.05381	5.06831	4.66476	4.64199	4.88877	5.20328	4.42573	4.18405	4.4419	4.2516	4.86692	4.63668	4.20931	4.54564	4.42573	5.47017	4.70686	4.53366	4.86249	4.33835	4.41096	5.00122	4.58613	4.9787	4.97051	4.80169	4.58382	4.61845	5.21897	4.48539	4.91022	4.48867	4.78539	5.04052	4.54299	4.99521	4.30526	4.45627	4.77933	6.0532	4.43253	4.23546	4.60031	6.04743	4.65767	4.03385
AK024242 /// RP11-758M4.4	3.47585	3.41142	3.27807	3.84482	4.32334	2.73266	5.18728	3.61312	4.68387	4.22162	2.83782	5.17166	2.69663	2.60608	2.95729	3.69365	2.67801	4.51305	6.28769	3.42658	4.7339	3.63594	3.32699	3.58469	2.72524	3.4795	3.37058	3.74106	3.36713	2.68836	4.00257	5.12869	2.81762	3.70741	2.90238	4.67367	3.44932	4.70609	4.09545	4.27546	3.66265	2.84382	4.58282	3.40351	6.34803	4.31734	3.6983	3.31259	3.61026
AK024936	2.92237	2.89773	3.09158	3.90019	3.91877	2.9215	2.95985	4.08734	2.83492	3.28793	2.43076	3.79138	3.1621	2.9024	3.05163	3.54486	2.63447	2.80878	3.0865	3.29961	3.477	3.4528	2.46612	2.70726	3.1397	3.28469	3.31745	3.67198	2.86042	2.68896	3.09975	4.54946	3.24368	3.47685	2.87207	3.90771	2.8715	2.85776	3.29554	3.67105	2.5711	2.74067	4.037	3.16554	3.36896	4.01186	4.81786	3.38861	2.84455
AK025117 /// GPATCH2L	7.97111	8.29915	8.33807	8.32382	8.22711	8.67509	8.00687	8.02867	8.24136	8.23041	8.08041	7.96835	8.09583	8.59233	8.55169	8.47346	8.26626	8.3115	8.42003	8.62469	8.19294	8.70075	8.08621	8.42944	7.97827	8.28043	7.92567	8.30877	8.475	8.07849	8.39451	8.18016	8.16217	8.2205	7.83196	8.15483	8.37631	8.12601	8.32085	8.43047	8.47455	8.20425	7.46878	8.26898	8.03238	8.11038	7.68306	8.17549	7.39807
AK025288	7.56605	8.03825	8.68674	10.0364	8.79065	8.51378	9.10191	8.77303	9.32279	8.74787	7.32212	8.53538	9.7001	9.03557	9.3427	9.54162	8.24448	8.6952	9.14669	8.89834	8.64897	9.05094	8.30794	9.1915	8.89835	8.71424	8.53055	9.31824	9.22069	7.8962	8.52966	9.17253	9.1641	9.07753	8.23783	9.8055	9.08655	7.73857	8.55166	8.747	8.36333	8.64415	8.62272	8.83276	9.20235	8.67294	8.7133	8.36383	7.40433
AK025975 /// RP1-74M1.3	2.52642	2.60884	2.60532	2.65313	2.68564	2.89159	2.70215	2.74793	2.96157	2.383	3.10954	2.87322	3.03835	3.01695	3.17603	2.762	3.02291	2.37246	3.12213	2.95922	2.76384	2.85235	2.29677	2.70726	2.87326	2.64075	2.66373	2.3672	2.73164	2.8296	2.24277	3.141	3.04816	2.70784	3.03066	2.83621	2.8609	2.77663	2.60628	2.75351	2.82103	3.38756	2.65912	2.95271	2.71335	2.64923	3.10329	2.05994	2.90719
AK026714 /// PELI1	9.81803	10.3649	10.5648	10.1339	10.3127	10.6413	10.4791	10.296	10.687	9.5864	9.92107	10.5375	8.89519	10.9731	11.4359	10.2078	9.5057	10.1453	9.81091	10.0476	9.90122	10.8964	10.051	10.6259	10.4079	10.3539	10.472	10.9172	10.2417	8.94101	9.97497	9.44641	9.06173	9.97895	7.62776	10.5439	10.3569	9.51339	9.81346	9.35033	10.3427	10.6178	9.42208	10.5032	10.7136	10.3282	10.1155	10.122	9.04271
AK026905	7.77753	8.17347	8.42286	7.56645	7.82094	7.59324	7.99347	7.64031	8.66432	8.22174	7.55355	7.76566	7.86682	8.19388	8.83818	7.19792	6.90909	7.93951	7.17355	7.11711	8.08093	8.72336	7.51096	8.20865	7.69431	8.33191	7.59664	7.8224	7.34138	6.90178	7.49513	7.78423	7.2148	7.83125	6.00856	7.81712	7.60151	7.01961	7.2987	7.52053	8.23303	7.82721	7.33837	8.07521	7.9962	7.92405	7.02867	6.26213	7.06761
AK054708 /// RP11-547D24.1	3.16543	2.84985	2.78374	3.16718	3.2352	2.79749	2.72948	2.90576	3.19776	2.83937	3.06894	3.12655	2.77	3.05175	3.23793	2.96462	2.80867	3.20216	3.0162	2.92158	3.03563	2.75108	2.85718	2.98583	2.96334	3.33688	2.88057	2.85124	2.97462	2.8978	2.87688	3.20892	2.82252	2.96468	2.9421	3.06498	3.51547	3.2765	3.21403	2.83337	2.85258	3.27751	3.16425	2.93783	3.09015	2.91236	3.12718	2.66657	2.93703
AK054988	3.23761	3.51693	3.37271	3.55308	3.70263	3.33192	4.39109	3.41674	3.63503	3.59065	3.22526	4.54251	3.21282	3.62745	3.44667	3.62297	3.52291	3.8391	4.72776	3.37772	3.9402	3.58852	3.32699	3.35632	3.49966	3.43743	3.2984	3.49809	3.3428	3.36887	3.44234	3.46073	3.35246	3.48816	3.35727	3.72164	3.48573	3.51658	4.80813	3.24106	2.82058	3.79516	3.65249	3.48778	4.88312	3.54786	3.96247	3.49701	3.42405
AK054988 /// TPTE2P1 /// TPTE2P1	2.79499	2.48797	2.84584	2.72236	2.56824	2.64684	3.23514	2.63926	2.5066	2.54419	2.7375	2.40952	3.22753	2.39319	2.26866	2.3132	2.81256	2.61679	2.51219	2.2293	2.63693	2.61679	2.82444	2.55223	2.43049	2.79552	2.8133	2.47171	2.40584	2.93456	2.42605	2.59361	2.64075	2.44687	2.94038	2.95623	2.87356	3.29176	2.77855	2.46862	2.82857	2.90835	2.85333	2.23808	2.49052	2.51638	2.61679	2.37098	2.91113
AK055055 /// RP11-752D24.2	2.6796	2.80775	2.54725	2.85013	3.88293	2.48369	3.6338	2.57486	3.45035	3.01509	2.52445	3.84265	2.68969	3.21861	2.85567	3.14955	2.5116	3.05397	4.12262	2.82832	3.13789	2.57581	2.60088	2.67313	2.62233	2.83625	2.65433	2.66775	2.83936	2.68818	2.79367	3.61953	2.60829	2.78273	2.99266	3.56078	2.70226	2.41605	3.31625	3.42093	2.31421	3.12549	2.96212	2.79085	3.26667	3.21053	3.5672	2.79085	2.74365
AK055458	6.3118	6.31679	5.84235	5.40186	6.53751	6.6945	6.70499	6.32231	6.74489	5.79928	5.40568	6.74886	5.47399	6.46713	6.04003	6.48323	5.83556	6.30494	7.22792	6.95409	6.39726	6.54522	6.57876	6.48676	5.79525	5.75318	6.17049	6.52006	6.48252	4.96201	6.73871	6.20812	5.63366	6.13321	5.10841	6.64438	5.98228	5.7782	6.89755	6.2719	5.84112	6.38005	7.17082	7.32315	6.53461	6.72774	6.43053	6.85126	5.47403
AK055910 /// ZBTB1	4.19594	4.14309	4.75613	3.90372	3.95484	3.75258	4.54055	3.88931	4.40891	4.26617	3.57158	4.52618	3.33031	3.63292	3.91078	4.13988	4.1897	3.53129	3.99023	3.65422	4.66229	3.80188	3.99986	4.05936	4.31126	3.38788	3.61525	4.01707	4.51253	3.34732	3.82061	5.47151	4.58663	3.65853	3.4293	4.80034	4.0017	2.71208	4.43534	5.28098	4.25789	3.72821	5.10864	4.07604	4.25828	4.37181	4.30286	4.23178	4.26586
AK055981	5.95314	6.43752	5.94811	4.32366	4.2536	6.0562	4.80892	5.19622	4.50555	5.49302	6.40399	4.31868	5.97465	5.32752	4.78579	5.87763	5.72402	4.6975	4.71724	6.06459	5.33577	5.17336	5.9391	5.3301	5.06862	5.42276	5.14542	4.78498	4.93271	6.02838	5.77492	4.9308	5.92826	5.41453	5.75665	5.15455	4.58918	5.15624	4.95125	5.4309	6.3423	4.97356	5.145	5.08246	4.59438	4.61423	4.26786	5.08107	5.61733
AK055981 /// RP11-617F23.1	7.08378	7.42647	7.02311	5.9498	6.37249	7.06378	5.87694	6.5764	5.8174	6.46903	7.33013	5.71633	7.14982	6.55767	6.05497	7.08277	6.61624	6.25487	6.04881	7.0936	6.55591	6.3604	7.0205	6.47963	6.35937	6.25153	6.13228	6.372	6.46575	7.01145	7.08443	5.61005	7.17691	6.58933	7.0704	6.01953	5.92115	5.79823	6.1864	6.86425	7.62067	6.48132	6.84642	6.40531	5.79172	5.78797	6.04071	6.95519	6.66101
AK056098	5.13001	4.7168	4.69879	4.69634	4.20028	4.56425	4.71338	4.3485	4.17385	4.44282	4.53111	4.71852	4.51708	4.40954	4.56571	4.68225	4.40546	4.57475	4.92812	4.72636	4.22879	4.62959	4.74683	4.07008	4.72835	4.48556	4.28191	4.94105	4.48151	4.76073	4.37598	5.0345	4.59988	5.27553	5.03379	5.10417	4.92517	5.019	4.71195	4.49963	4.80148	4.39812	4.43757	4.57703	4.01782	4.0362	4.99383	4.29117	4.59271
AK056982	5.03885	5.01536	5.06863	5.46005	6.90329	5.03217	6.96559	5.85627	6.03665	6.65727	4.99421	6.92171	4.88078	4.91797	5.09586	6.69057	4.94755	6.87024	7.28751	5.86251	6.13348	4.95768	4.85963	4.7484	5.22548	5.09081	4.81369	5.23966	6.05052	4.9634	6.36448	7.4007	4.90492	5.83863	5.06145	5.67413	5.25172	5.33043	6.86874	6.25805	4.98526	5.24593	6.37316	5.58957	7.25628	6.85933	6.26938	5.11975	5.09862
AK057259 /// AK096803	3.82887	3.87864	3.37377	4.17618	4.46766	3.65512	3.99211	4.03678	4.3133	3.68374	3.2943	4.55086	3.60767	3.87036	3.63313	4.53476	3.70879	3.46096	3.92353	3.55894	3.3788	3.9854	3.38136	3.76192	4.21431	3.621	3.67421	4.47537	4.62824	3.41176	3.76242	3.91621	3.3642	4.13582	3.28934	3.96365	3.8904	3.84451	3.86082	3.18102	4.16292	4.3168	6.31047	4.11923	3.76245	3.59621	5.08106	3.82534	3.31241
AK057554 /// RP11-144L1.4	3.33376	3.64488	3.30062	3.64647	4.65966	3.4878	4.37391	3.48234	4.56728	4.01982	3.0653	3.83443	3.01209	3.09472	3.23049	4.53415	3.0685	5.01013	4.99318	3.34558	3.65505	3.46711	3.0726	3.16558	3.05411	3.26402	3.39977	3.26772	3.9331	3.29636	4.90163	4.22701	3.21233	3.30767	3.48008	3.54511	3.52914	3.70139	4.29193	3.58656	3.17318	3.61105	3.91987	3.18971	4.57519	4.46385	4.12258	3.653	3.2601
AK057657 /// RP11-473I1.9	10.4807	10.7121	11.198	11.0145	10.5443	10.6232	10.7707	10.5169	10.9831	10.8582	10.6003	10.391	9.98849	10.8204	10.7868	10.6554	10.6466	10.5202	10.5187	10.5564	10.8369	10.6928	10.4514	10.852	11.0584	11.2083	10.9317	10.7373	10.8736	10.1844	10.5195	10.7123	10.1847	10.7479	10.1246	10.4393	10.7854	10.3543	10.4179	10.8485	10.884	10.6378	10.3886	10.7121	11.0002	10.3571	10.4077	10.4862	10.6304
AK057978 /// MKLN1	9.40757	10.0912	9.97663	9.74369	10.0204	10.033	10.2025	9.64596	10.3799	9.79544	9.70615	10.3092	9.48839	10.1845	10.3205	9.59301	9.67312	9.83331	9.89633	10.001	9.57903	10.4757	9.9458	9.98053	9.67948	9.82257	9.79575	9.95446	9.8833	9.17666	9.86471	9.82172	9.52985	10.1413	8.85189	9.94626	9.9291	8.57787	9.72302	9.81948	10.2152	9.97663	10.1117	9.8916	10.0752	9.9082	9.603	9.25452	9.28701
AK074476	3.19281	3.30475	3.36206	3.78817	3.30178	3.39238	3.55074	3.23674	3.79371	3.20769	3.44194	3.0825	3.45178	3.53117	3.03965	3.2663	3.77314	3.36388	3.50345	3.16496	3.01331	3.58168	3.50597	3.62133	3.44957	3.60359	3.67016	3.66715	3.74202	4.10058	3.15964	3.55489	3.52308	3.72255	3.84744	3.70214	3.64654	3.99539	3.48813	3.22826	3.71297	3.17168	2.96506	3.87366	3.34179	3.59533	3.18018	3.19153	3.54517
AK090844	9.17981	9.50966	9.59476	10.1768	9.889	9.41906	10.0026	9.76322	10.4511	9.90475	9.4085	9.6901	8.13594	9.71297	9.84688	9.54679	9.3227	9.77453	9.65418	9.21156	9.70727	9.70846	9.59324	9.50171	9.55646	9.37128	9.52516	9.7679	9.91896	7.5343	9.29963	9.58229	8.43121	9.56916	7.17157	9.92661	9.69716	8.95997	9.72416	10.0843	9.40831	9.80375	9.04929	9.74351	10.4843	9.94316	9.22925	9.79104	9.27835
AK091028 /// GMDS-AS1	4.96214	4.97257	4.88583	5.49382	5.89698	5.2703	6.63317	5.73688	5.60733	5.80108	4.91554	6.92039	5.36688	5.11613	5.2547	5.74785	5.24101	5.27825	6.33785	5.75353	5.94407	4.95128	5.18637	4.72013	5.13636	5.28601	5.14547	5.48169	5.39374	4.89357	5.71793	7.28545	4.44385	5.8269	4.99081	6.03968	5.70442	5.58542	7.24887	6.36254	4.88576	5.00616	6.29853	5.49596	6.82328	6.21854	6.81799	5.87687	5.26056
AK091729	6.78941	7.11328	7.09466	6.54946	6.16079	7.40407	6.42084	7.03187	7.54214	7.02605	7.19596	6.80266	4.73523	7.05999	6.84991	6.52419	7.0017	6.52399	6.36148	7.01774	6.55371	6.88354	7.07379	6.78903	6.77826	6.73162	6.53911	6.96368	6.91323	5.5479	6.63823	6.58379	6.08601	7.34752	5.11291	6.23768	7.11154	6.42032	6.92308	6.77967	7.17899	6.68644	6.86966	7.06146	7.08781	7.10024	7.01781	6.76333	6.37714
AK093205	3.19415	2.6048	2.27179	6.32268	8.5103	2.49471	7.01973	4.57737	7.39429	7.63175	2.28822	6.83957	2.142	2.41192	2.49564	7.11475	3.11376	7.94062	8.60437	3.03307	5.2166	3.47683	2.39583	2.9524	3.10317	2.72785	2.55396	3.45813	3.62856	2.30001	6.70571	6.87577	2.10048	5.06492	2.14542	4.43125	3.40427	3.02909	6.02642	5.51206	2.95872	2.58675	5.08582	2.80225	8.327	7.49582	4.83504	4.91879	3.05214
AK093256 /// RP3-486I3.7	2.31046	2.36265	2.14995	2.94933	2.80186	1.94635	2.18398	2.37485	3.83595	3.32089	2.29359	2.14493	1.97197	2.07502	2.64688	2.70152	2.03543	3.40812	3.27127	2.08506	1.91808	3.38497	2.50739	2.44777	2.04106	2.48042	1.99029	2.19692	2.28512	2.17426	2.81086	2.53374	2.01181	2.18401	2.05464	3.43487	2.10524	2.63619	2.66037	1.97566	1.92707	2.40121	3.10766	2.24042	2.21295	2.88281	3.82846	3.43428	2.42687
AK093301 /// RP11-862G15.1	2.39398	2.68108	2.7688	2.73249	2.56808	2.72525	2.95008	2.6627	2.90815	2.77087	2.74139	2.73163	2.86605	2.72927	2.82913	2.93068	2.69627	2.96581	3.27152	2.7034	2.78088	2.7676	2.70775	2.94885	2.72643	2.51337	2.94934	2.85123	2.77651	2.80812	2.9335	2.74851	2.29173	2.9717	2.73577	2.91188	2.58409	2.81432	3.15206	2.92519	2.61185	2.81433	2.88907	2.58185	2.6631	3.24319	2.83638	2.6183	2.8445
AK093356 /// RP11-10L12.4	5.8675	6.1012	6.17266	7.1041	5.93028	6.662	5.6827	6.3063	6.03884	5.758	6.60038	5.80307	6.47119	6.60715	6.27937	5.8582	6.69102	5.67754	5.7274	6.49153	6.07879	6.20334	6.41481	6.70132	6.85961	6.41984	6.50282	6.62844	6.68127	6.44602	6.23246	4.87597	5.89074	6.62958	6.49988	6.06401	6.41112	6.92482	6.0859	5.34385	5.74142	6.87835	5.89672	6.4434	6.22097	6.40397	6.21411	6.47053	6.47825
AK093362 /// RP11-774D14.1	3.69454	4.38151	3.56891	5.01816	5.65923	3.32141	7.05474	4.94088	5.32536	5.42789	3.35319	6.87059	3.60438	3.52029	3.98179	5.72337	3.73287	4.50713	7.45896	4.25864	5.03601	4.30244	3.6088	3.7728	4.1132	3.94397	3.84211	4.17466	5.08994	3.35995	4.34604	7.57312	3.29542	4.5912	3.52228	4.73278	4.79812	3.57293	7.16073	6.23112	4.14273	3.58052	6.31435	4.58182	6.79094	5.60201	5.79442	4.90056	4.13695
AK093370 /// CTD-3046C4.1	2.62686	3.10687	2.80406	2.75357	3.26983	2.53014	2.83216	3.15306	3.84862	3.5191	2.74467	2.98543	2.75131	2.68306	2.71318	3.38298	2.73993	3.47667	3.43241	2.58925	3.133	2.58792	2.53542	2.84043	2.69623	2.92467	2.8835	2.80644	2.80045	3.24027	3.19208	3.66707	2.76132	2.91643	3.11539	3.042	2.79868	3.08887	3.45448	2.61094	2.6061	2.80017	3.44241	2.74115	3.27939	3.3505	2.87369	2.9576	2.39732
AK094644	4.57951	4.83527	4.58848	7.06546	7.9492	3.92397	6.27565	6.22862	8.085	6.98529	4.19148	6.71529	3.38451	4.01729	4.67249	6.26855	4.53276	7.60556	8.00808	5.90755	5.95709	5.54402	4.30417	4.70635	4.95352	4.6196	4.4776	5.30646	5.89318	3.34457	6.04922	7.16924	2.89339	6.86338	3.15742	6.13898	5.87873	5.91689	6.38374	6.02169	4.27355	4.5723	7.76425	5.48994	7.25183	6.82705	6.87228	5.96274	5.20949
AK094733 /// RP11-114G22.1	3.0149	2.84999	3.15533	3.19609	3.97261	3.1101	3.20588	3.41425	3.23639	3.35893	3.76305	3.86105	3.03106	2.75854	2.95515	3.15149	2.96304	3.96436	3.73183	3.09988	3.91885	3.19369	3.10397	3.09685	2.95507	3.18274	3.70244	3.39467	3.07518	3.3581	2.95064	3.87134	3.10787	3.01787	3.15149	3.34585	3.20047	4.1136	3.19874	3.1665	2.79714	3.30497	2.96756	3.19946	4.06248	3.9954	3.145	3.00947	2.97153
AK096159	2.9549	3.14044	3.09994	3.70854	4.28146	2.34213	5.04671	3.43746	4.43307	4.78683	2.86117	5.06412	2.4067	2.94194	2.89509	4.15405	2.70227	4.06291	5.43186	3.54529	3.30867	3.3286	2.70842	3.46508	2.6711	3.05109	2.8367	2.73691	3.69096	2.50739	3.43046	6.05605	3.22698	3.48068	2.25335	3.0672	3.12487	3.48993	4.70714	3.93493	3.04879	2.58999	4.45942	3.20444	5.95378	4.68288	3.24217	3.69358	3.02816
AK096335 /// AP000662.4	2.33549	2.61413	2.83708	2.81956	3.3964	2.78857	2.92906	3.36784	3.33634	2.41154	2.53249	3.53699	2.25432	2.8711	2.34631	2.89463	2.32636	3.30353	2.91724	3.12515	2.46377	2.57524	2.42904	2.84728	2.59808	2.18836	2.6126	2.59411	3.33636	2.26739	2.43931	3.05874	2.44736	2.91317	2.55177	3.43487	2.9545	2.75162	3.76736	3.27054	2.22913	2.5639	4.02859	3.3392	2.60879	2.61464	3.66419	3.20228	2.39732
AK096592 /// YLPM1	7.1463	7.35865	7.12147	7.08748	7.7605	7.01283	8.67409	6.97497	8.41346	7.74715	6.39972	8.90828	6.88904	6.96185	6.82839	8.30074	6.92186	8.15168	9.34531	7.89019	7.51438	7.4301	7.24892	6.53356	6.65364	6.87695	6.26831	6.97958	7.02269	6.05545	7.70394	9.12049	7.03474	7.79375	6.45117	7.30364	6.51924	6.47301	8.67157	8.44617	7.19303	6.84887	8.13644	6.94009	8.79993	8.01553	7.76077	7.14764	6.23732
AK096803 /// RP11-395B7.2	5.71167	5.57886	5.73571	6.17651	6.49312	5.87328	8.17066	6.68611	6.56338	6.45107	5.52008	8.73371	5.63686	5.97974	5.93157	6.55979	5.81602	5.88425	8.77917	6.07787	7.1233	5.63838	5.53515	5.87351	5.68716	5.84032	5.9924	6.40671	6.15765	5.69232	6.72017	9.02502	5.37169	6.27024	5.31888	6.63483	6.40096	5.73159	7.69867	7.59794	5.68184	5.92279	7.42727	6.03082	8.32746	7.81242	6.80362	6.55208	6.04235
AK097119 /// RP11-73M18.6	4.52089	4.86223	4.13579	4.81622	4.01569	4.96445	3.32127	3.79251	3.95525	4.13922	3.96186	5.43199	4.18274	5.38754	4.79637	4.2986	4.22916	3.45029	4.0123	4.78926	4.49653	4.34999	4.89325	4.36359	4.60113	4.82189	4.29804	5.12757	5.44498	4.38144	4.22937	3.96085	4.35909	4.06516	3.89328	5.60552	4.56367	4.50219	4.27593	3.9843	5.16838	5.41027	3.39071	5.36606	3.95728	4.70536	5.2949	4.9876	4.09032
AK097242 /// CTB-127C13.1	3.27083	2.90711	3.13931	3.13925	3.08029	3.28642	3.14838	3.10149	2.81054	2.97789	3.34753	3.275	3.25799	3.11702	3.1108	3.22498	3.18165	3.03492	2.21902	3.53783	2.49601	3.24598	2.96931	3.24538	3.4619	2.59955	3.24478	3.94986	3.14048	3.33918	2.64029	2.8744	2.97154	3.32031	3.99111	2.79851	3.49872	3.32587	3.21405	2.87158	3.31331	3.13535	3.5848	2.78524	3.37816	3.02527	3.23532	3.44629	3.33426
AK097370	6.18584	5.71069	5.62898	5.43907	5.38429	5.86724	5.49146	5.52101	5.03183	5.14205	4.89593	4.89023	5.93706	5.43813	5.24587	5.41271	5.4694	5.65163	4.96606	5.2155	4.56418	6.09697	5.53312	5.46051	5.63702	5.6429	5.76642	6.30965	5.24586	5.82459	5.13572	4.64586	5.4148	5.90579	5.76714	5.1678	5.9494	6.38625	4.95243	5.29092	5.63857	5.13375	4.63229	6.14357	5.27543	5.95337	5.25999	4.96109	5.58918
AK097453	9.90541	10.0292	10.1669	10.2693	9.9549	9.88764	10.0491	10.0302	10.4331	9.34122	10.0252	9.78818	7.52292	10.3299	10.4056	9.25753	9.61296	9.98514	9.51076	9.84822	10.0513	9.78143	9.65287	9.86804	9.8605	10.0631	10.1353	10.1852	10.2004	7.1034	9.30544	9.89383	7.46595	10.0008	7.01695	10.0873	10.1659	9.82401	9.75948	9.54473	9.63798	10.5201	9.49676	10.0387	10.3071	10.3098	9.70457	9.8768	9.73723
AK097836 /// RP5-971N18.3	2.29217	2.61189	2.87276	2.71471	4.31034	2.69947	3.58368	2.85569	3.06932	3.63313	2.66812	4.05195	2.53654	2.51982	2.66821	2.86152	2.92472	3.48897	4.57058	2.89962	2.92933	2.64816	2.86831	2.85812	3.07873	2.78825	2.86831	2.63874	2.57112	2.7398	3.27965	3.7898	2.40523	3.02553	2.77944	2.41571	3.39612	3.19324	4.16576	3.21811	2.78454	3.17908	3.288	2.79433	4.27938	3.65633	2.94302	2.42936	2.95374
AK098263	3.93286	5.06433	4.85963	3.67567	4.10487	5.23126	4.14361	4.63372	3.76428	3.39825	4.21283	2.94012	3.04565	4.30773	4.29793	3.43089	5.29816	5.06383	3.75863	4.41518	3.22777	4.07333	5.44425	4.95876	3.54504	3.88965	4.89467	5.24552	4.9975	4.50217	4.13869	3.55523	3.42032	4.68723	3.24409	4.158	3.86563	4.16106	5.57994	3.21811	4.01311	6.17476	4.45994	4.89334	3.94059	4.78949	3.86493	4.30262	3.71546
AK1	7.58935	7.54463	7.77169	6.80759	6.92882	7.59667	7.14726	7.11224	6.4599	7.64439	7.28715	7.07055	6.81055	7.10162	7.2621	7.13046	7.28308	7.75422	7.07742	7.23797	7.28494	6.75451	7.75847	6.83657	6.87852	7.17197	7.00327	6.66556	7.06245	6.34899	7.37336	6.75224	6.2869	6.96325	5.96743	6.66608	7.11554	6.49048	6.93386	7.38755	7.77858	7.04947	7.54286	7.00407	6.11641	6.37742	6.79723	7.72882	7.12446
AK123826 /// RP11-510M2.2	2.85735	3.31581	3.25374	3.52803	3.64088	3.58289	3.50848	3.44655	3.79519	3.58438	3.28347	3.55323	3.3793	3.68372	3.41811	3.53356	3.37417	3.73624	4.0234	3.2724	3.81377	3.29838	3.49896	4.1643	3.64645	3.54658	3.83113	3.84913	3.87509	3.66771	3.41937	3.36247	3.28388	3.89549	3.53216	3.88162	3.5994	3.52064	3.52276	3.96477	3.4	3.45861	3.7554	3.4241	3.62989	3.0625	4.61708	3.80764	4.02475
AK125860 /// RP11-582J16.4	5.01891	4.79856	4.87425	5.05209	4.49094	5.08462	4.05059	4.5573	4.64635	4.52488	5.05605	4.61073	4.98876	5.11253	5.01492	4.78809	5.23071	4.83429	4.97791	4.7003	4.19626	4.80361	4.925	4.98067	5.19931	5.03895	5.40128	4.70705	4.87425	5.08776	4.65209	4.68203	5.05249	4.84601	5.1254	4.87425	4.94758	5.22248	4.45291	4.56981	5.15442	5.54773	3.9301	4.81481	4.60024	4.87425	4.46304	4.42328	4.88444
AK126278 /// CUL4A	7.12685	7.44817	6.94413	6.07825	6.14131	6.57913	6.15622	6.55906	7.23761	7.75978	7.64348	5.77276	6.10486	6.78125	6.63085	6.42438	6.57698	6.44328	6.4839	6.65132	7.298	6.76204	6.91006	6.6648	6.31322	7.218	6.83236	6.82473	6.07482	6.00604	6.88993	5.8573	6.94183	7.24107	5.85815	5.1616	5.28628	5.75715	6.27174	6.2976	7.43244	6.21663	6.59774	7.00681	6.56824	6.9646	6.3011	6.24786	6.52423
AK128734 /// JAK1	4.76506	5.72337	5.82612	5.12789	5.16464	4.88193	4.23932	4.37002	5.35748	4.73471	5.20842	4.62181	5.20901	6.07615	5.27353	5.30656	4.54372	5.11098	4.76832	5.2515	4.28137	5.14825	4.76146	5.48412	4.69743	5.20726	4.78779	5.10361	5.11861	4.24356	5.39006	4.14652	5.03735	4.61975	4.50529	5.10037	4.93338	4.9554	5.11327	5.09959	5.10594	4.49964	4.82381	4.82848	5.1981	5.25294	4.47541	4.62258	4.69066
AK130486	5.29957	5.40395	4.84455	4.71054	4.45087	5.4233	4.5002	4.72302	4.52505	5.10113	5.16207	4.43318	4.56954	4.81344	5.2255	4.35984	5.08	4.5515	4.9225	4.45639	4.87263	5.11557	5.07012	4.89502	4.78847	4.91817	5.02385	4.30523	4.79544	4.81729	4.50462	4.49616	5.11286	4.79807	4.61436	4.72802	4.62726	4.9958	4.38065	5.0202	5.30335	4.66171	4.3361	4.78564	4.62282	4.77588	4.44329	5.12597	4.91001
AK131021	4.04508	3.93275	3.69408	4.0459	3.93831	4.26678	5.2242	4.24714	4.5858	4.42567	4.07292	4.49053	4.09164	4.14263	4.17971	4.26358	4.18298	3.99936	3.91762	4.07407	3.78685	3.86015	3.93671	3.67928	3.86108	4.31274	3.90283	4.26702	3.98611	3.86329	4.47085	5.31149	3.56899	4.54425	3.71373	4.21148	4.64084	4.44266	4.52219	4.53273	3.43906	4.27753	4.90736	3.81748	3.56938	4.3409	4.11442	3.92684	4.19381
AK2	8.55205	8.52562	8.33942	7.8601	7.97361	8.75474	8.0564	8.14564	7.61473	8.1046	8.68523	8.27496	9.23391	8.37458	8.36778	8.33057	8.91924	8.18503	8.15708	8.6722	8.305	8.50402	8.36654	8.45998	8.56617	8.43266	8.33937	8.44145	7.87142	9.27898	8.5388	7.96164	9.22647	8.41524	9.413	8.36125	8.48887	8.85539	8.14765	8.20468	8.47507	8.29	8.0803	8.37809	7.27325	8.51778	8.09271	8.38132	8.70265
AK291611 /// TRGV7 /// TRGV7	5.95104	5.49327	5.9616	4.98112	5.28716	5.28641	5.46754	6.12352	5.4848	5.49656	5.78114	4.73348	5.52671	5.05685	5.04244	5.67026	5.17691	5.56106	5.60408	5.46545	5.5609	5.60036	5.26315	5.08467	5.7087	5.20388	5.17123	4.98983	5.33972	5.53197	5.95987	5.14522	5.37894	5.71637	6.61597	5.26713	4.95669	5.22683	5.72982	6.10352	6.46235	5.57662	5.49922	5.56653	4.82848	5.27627	5.38737	5.91458	5.28947
AK3	7.92257	7.96364	7.33497	7.72504	7.21697	7.78385	7.04284	7.73302	7.15862	7.7607	8.15665	7.09806	8.25032	7.3947	7.22668	7.80361	7.862	6.62807	6.96086	7.83688	7.59361	7.365	7.8196	7.68802	7.2595	7.1937	7.73846	7.02391	7.13182	8.26428	7.8566	7.18525	8.2044	7.29854	8.26459	7.41043	7.29048	7.49214	7.56773	7.51011	7.82721	7.09889	7.12961	7.24475	7.1158	7.36355	7.15714	8.1585	7.78799
AK311120 /// LSAMP	3.94181	3.55601	3.58398	3.35848	3.51715	3.64008	3.55256	3.48263	3.83219	3.6606	3.71928	3.49831	3.60723	3.46945	3.42434	3.75359	3.43228	4.19833	3.7209	3.52912	3.79171	3.58705	3.51993	3.72373	3.32486	3.50417	3.60744	3.83405	3.48789	3.57905	3.59935	4.1638	3.30566	3.75002	3.4362	3.31132	3.81943	3.78055	3.70541	3.58641	3.85538	3.50367	3.49001	3.64413	3.35035	3.97769	3.47614	3.59415	3.80978
AK4 /// LOC100507855	4.31557	4.35487	4.23949	4.99077	4.92575	4.40646	5.53078	4.53706	4.96636	5.0663	4.36749	5.65148	5.32688	4.53212	4.51669	4.27172	4.60104	4.97251	5.97055	4.35175	5.32343	4.9169	4.40867	4.91629	4.67009	4.39505	4.54176	4.85013	4.89755	4.63483	5.3303	5.92579	4.62014	4.9959	4.71797	5.13056	5.01646	5.27182	5.68415	4.98463	4.13366	4.62023	5.28575	4.52855	5.97876	5.57904	4.97125	4.58223	4.329
AK5	6.46131	6.32212	6.46924	4.76572	5.44865	5.93818	5.69095	5.42182	5.95896	6.2121	6.03836	6.24001	6.62252	5.731	6.32771	6.59891	5.80394	6.69139	6.62912	6.56189	5.21366	5.2122	5.96392	5.01436	5.45589	5.43415	5.09077	5.2771	5.52569	5.9609	5.4757	6.53786	5.48871	5.032	7.30448	5.83012	5.47011	5.86983	5.85862	6.1577	6.44833	4.39653	5.78848	6.22628	6.07775	4.78022	6.93503	5.98572	6.37434
AK6	9.32043	9.16214	8.67743	8.56746	8.40569	8.88923	8.58352	8.86265	8.31499	9.11459	9.17578	8.75451	9.67016	8.72024	8.40525	9.10676	9.21932	8.72656	9.03167	9.37751	8.97467	8.71194	9.15685	8.83879	8.91905	8.74411	8.7175	8.72748	8.65271	9.49202	9.21431	8.74215	9.71975	9.1729	9.8381	8.90248	8.67069	9.13561	8.83397	8.99865	9.1805	8.756	8.98075	8.76861	7.81819	8.48203	8.96913	9.31982	9.14391
AK6 /// TAF9	10.2138	10.001	9.9563	9.23618	9.69652	10.1516	9.40841	9.47502	9.20573	9.9124	10.0656	9.74923	10.9258	9.67892	9.60335	10.068	10.2386	9.36879	9.66075	10.0521	9.63986	9.83443	9.84624	9.82603	9.84151	9.79083	9.69778	9.59315	9.53024	10.6847	10.0365	9.46254	10.5094	9.94124	10.6676	9.63362	9.48624	10.0536	9.63567	9.68358	9.97575	9.60386	9.58431	9.54276	9.08126	9.69324	9.66971	10.061	10.0992
AK7	3.34606	2.8948	2.91645	3.40995	3.29372	2.83248	3.15597	3.57647	3.46626	3.18864	2.93483	3.51011	3.34085	3.11348	3.02108	3.02364	3.03153	3.59069	3.12019	3.10128	2.91573	3.01082	2.95812	3.06162	3.05262	3.16837	3.18581	3.15054	3.69196	2.89078	2.96154	3.16237	2.80895	3.14673	3.20831	2.9622	3.53749	3.1572	3.20933	3.12646	3.0221	3.20128	4.04486	2.97803	3.5709	3.0252	3.78064	3.1437	2.78728
AK8	3.35384	3.17654	3.63661	3.76951	3.93281	3.38471	3.43933	3.65708	3.47142	2.86844	3.63614	3.59989	3.64098	3.30156	3.37763	3.32125	3.41735	3.85337	3.46529	3.7736	3.5844	3.33618	3.52607	3.38125	3.29935	3.3468	3.41343	3.75929	3.45164	3.5545	3.43257	3.6727	3.71244	3.83387	3.68258	3.67595	3.24585	3.60478	3.42226	3.55466	3.2826	3.7678	3.69096	3.38498	3.39372	3.07017	3.55753	4.02639	3.43474
AK9	6.33478	6.66655	5.88728	6.16482	6.029	6.06893	5.47245	5.69225	5.99098	6.11442	6.15399	6.13303	5.90806	6.2182	6.09707	6.02311	5.9473	5.5038	6.00896	6.24208	5.91604	6.08435	6.36048	6.32717	5.50137	5.91127	6.01733	6.22708	5.55747	6.03775	6.41064	5.83393	6.04011	5.64062	5.80983	5.22726	5.95949	6.42289	5.62952	5.61256	6.2522	6.40418	5.30211	5.40236	5.72266	6.52782	5.76348	5.80424	6.11568
AKAP1	5.24843	5.36465	5.37144	4.89928	4.784	5.23715	4.78997	4.93805	4.67216	5.0881	5.29161	4.90742	5.22182	5.17108	5.24792	5.11438	5.29533	4.89088	4.64087	5.20951	4.9768	5.20113	5.5384	5.09255	5.03555	5.0618	5.08794	4.98745	4.95165	5.46568	5.06299	4.23499	5.3967	4.75268	5.65349	4.81316	4.94266	5.48245	4.51114	4.77848	5.57681	4.75823	4.94493	4.88497	4.25406	4.37587	4.7362	5.59286	5.46984
AKAP10	7.90355	8.12566	8.48025	8.26061	8.29509	8.28843	8.80191	8.04004	8.45709	8.35215	7.47956	8.5399	8.32009	8.58769	8.32007	8.8821	7.94184	8.36168	8.40071	8.42863	8.43035	8.55961	8.21519	8.29383	8.1715	8.33766	7.88753	8.68361	8.26651	7.63999	8.19717	8.36769	8.65462	8.35032	7.66273	8.4687	8.10769	7.73827	8.39863	8.74749	8.22039	8.27088	8.25223	8.18803	9.00906	8.28746	8.21373	8.42118	7.69576
AKAP11	7.64392	7.84277	7.73171	6.58756	6.77099	7.26694	6.8823	6.87645	7.52121	7.39736	7.46374	7.48378	7.29092	7.37117	7.1948	7.71517	7.28927	7.01095	7.65003	7.44681	7.41377	7.24827	7.62004	7.22166	7.05671	7.27302	6.60976	6.82979	6.81004	7.06758	7.72656	7.49824	7.80738	7.37012	7.36606	6.84254	6.73196	6.48874	7.5516	7.70793	7.75291	6.68114	7.14581	7.06161	7.13145	7.28904	6.77711	7.48536	7.5183
AKAP12	5.02744	4.74858	4.86607	4.17451	5.55001	4.68801	3.92744	4.22863	4.50555	4.12579	5.70794	4.09291	5.40232	4.54456	5.00154	4.00474	4.53126	4.60143	4.30032	5.86251	4.5578	6.06659	4.19731	4.8863	4.56281	5.47709	4.91436	4.13904	4.44861	4.81931	4.43477	4.43495	4.37821	4.49618	5.91636	4.0145	5.40587	5.06791	4.10197	4.97027	5.45284	4.29011	4.71581	5.01892	4.10243	4.47938	4.9027	4.24029	5.12421
AKAP13	8.50488	8.6517	9.0689	8.82878	8.392	8.87436	8.35798	8.12936	8.66994	8.52376	8.86028	8.40335	8.40824	8.66621	8.69969	8.66148	8.44594	8.2743	8.44375	8.76016	9.11454	9.1731	8.71848	9.04777	9.04567	8.87337	9.31798	9.26746	8.55948	8.93896	8.94011	8.13568	8.85009	8.70434	8.87036	8.55323	8.8359	8.92135	8.83287	8.85432	8.80292	9.44834	7.91428	8.98434	8.86475	9.0392	8.42457	8.61149	8.45949
AKAP14	2.81822	2.87845	2.95601	2.90101	2.95579	2.72465	2.99604	3.03917	2.91698	2.9657	3.14159	3.24724	2.74839	2.70197	2.6753	3.11677	2.80119	3.68598	2.6805	2.90387	2.92699	3.0725	2.77963	2.76698	2.85221	2.8583	3.06358	2.79216	3.23208	2.73797	2.79868	3.08838	2.79176	2.85769	2.67134	3.02132	2.94257	3.53229	2.88241	2.78703	2.79303	2.7586	3.72825	2.9404	3.22601	3.05603	3.86356	2.7809	3.10805
AKAP17A	7.18253	7.27859	7.03013	6.77775	6.95659	7.30799	6.49822	7.04756	6.81975	6.97824	7.31423	6.72706	6.57128	7.22427	7.37731	6.49857	6.856	7.18837	6.73249	7.36555	6.89382	7.21463	7.1767	7.19438	7.4591	7.42204	7.20677	7.32275	7.13553	6.51797	6.82211	6.74073	6.7543	6.80875	6.40656	6.94565	7.5077	7.41852	6.71021	6.83447	7.35771	7.51519	7.06798	7.63565	7.01094	7.21134	6.89609	6.97486	7.10636
AKAP2 /// PALM2 /// PALM2-AKAP2	4.03708	3.53526	3.41458	3.88607	4.17207	3.6333	4.39913	4.04268	4.25946	4.19685	3.76143	4.26338	3.8248	4.2315	3.97082	4.01071	3.65357	4.50084	4.15446	3.90123	3.65354	4.04928	3.7176	3.72611	4.13828	4.20831	4.39503	3.57198	4.05887	4.04809	3.64878	4.15567	3.57186	4.22687	4.0282	4.24455	4.23039	3.82182	4.16968	3.84602	3.34127	3.9662	3.94464	3.83229	3.7168	3.60414	4.20905	3.64825	3.95357
AKAP2 /// PALM2-AKAP2	8.46188	8.39024	7.80498	7.61786	7.85129	8.9175	7.78555	8.17467	7.05226	7.98501	8.01343	8.47178	8.13295	8.39183	7.86781	8.72467	8.39119	7.8173	8.27464	8.53736	7.84705	6.96202	9.91943	8.24754	7.50727	7.31116	7.25683	7.92474	8.19938	8.98005	8.87635	7.5212	9.49373	7.56275	8.78431	7.16532	7.87098	7.41892	8.54858	8.22437	7.93753	8.74108	7.76588	8.60257	6.81179	7.17127	8.36656	9.47477	8.84456
AKAP3	2.80169	2.52839	2.75324	2.81956	2.1809	2.57907	2.31908	2.87612	2.28056	2.47083	2.47238	2.57976	3.37824	2.56022	2.70739	2.32589	2.34459	2.02258	3.02705	2.22779	2.80615	2.25733	2.92222	2.43684	2.56889	2.41395	2.58286	2.75378	2.35143	2.51312	2.57697	2.56961	3.39456	2.35951	2.45149	2.54419	3.25209	2.48715	2.40648	2.62829	2.72454	2.75649	2.98199	2.57153	2.13531	2.458	2.41541	3.12036	2.83478
AKAP4	3.20583	2.78481	2.8673	3.33159	3.16764	2.84979	3.54106	3.02182	3.55348	3.2126	2.73048	3.0638	2.89943	3.3082	2.94287	3.01404	2.94552	2.94374	3.08991	3.23472	3.52898	2.72498	2.98725	2.92058	2.82207	3.09894	3.29991	3.58616	3.06679	2.86264	3.05167	3.14664	2.93306	3.04216	2.71465	3.35056	2.90769	3.34984	3.35403	3.05587	2.63282	3.17268	3.10976	2.9898	3.2708	3.21697	2.89686	3.04632	2.95268
AKAP5	4.38936	4.2384	4.20118	4.22379	4.21616	4.14576	4.14731	3.89006	3.97652	4.49067	4.79843	3.9187	4.54946	4.12528	3.52843	4.84276	3.80199	4.2646	4.48162	4.28388	4.13587	3.63915	4.49819	4.2277	4.67984	4.29446	3.6472	4.0458	3.70911	4.31438	5.08733	4.46713	4.83516	4.09046	5.21331	3.60423	4.02139	4.42327	4.53142	4.20564	4.20157	4.05314	4.53152	4.29608	3.7745	4.47269	4.60647	4.1709	4.21439
AKAP6	3.98613	3.43519	3.53741	3.55671	3.86586	3.45773	4.20685	3.39363	3.72681	3.58578	3.58024	4.17525	3.52203	3.83489	3.41346	4.21331	3.1917	3.63579	4.80085	3.56102	3.9015	3.66197	3.34391	3.39443	3.728	3.37296	3.48366	3.73915	3.51989	3.50281	3.7535	4.7619	3.37713	3.72886	3.66509	3.75562	3.75676	3.44479	4.33165	3.90335	3.11516	3.60067	4.00131	3.73339	4.39196	3.95561	3.71724	3.43595	3.74811
AKAP7	7.24365	7.43491	7.44825	6.6799	7.22379	6.93839	7.17038	7.33004	7.00105	7.32501	7.12627	7.06076	7.64276	7.02639	7.22592	7.39618	7.33483	7.16557	7.93506	7.51913	7.19463	7.085	7.10478	7.17166	7.03746	6.9867	6.91132	6.748	7.02415	7.19787	7.1864	7.64651	7.28589	7.2813	7.73076	7.31228	7.3201	7.17173	7.29587	7.46385	6.98251	6.97529	7.50999	6.88776	7.05243	6.98238	6.90043	7.23976	7.24336
AKAP8	9.06645	8.88196	8.9102	8.52966	8.39986	8.91465	8.7282	8.65033	8.56789	8.92469	8.95001	8.6054	8.9148	8.7622	8.62505	8.75679	8.77289	8.50677	8.5304	8.80517	8.81944	8.8851	8.95156	8.81045	8.73612	8.85823	8.71731	8.43708	8.59469	8.71204	8.73419	8.63362	8.92604	8.66324	8.77505	8.3666	8.50888	8.53646	8.57315	8.63617	9.10816	8.62385	8.84952	8.67507	8.5878	8.84585	8.08796	8.60636	8.71666
AKAP8L	5.64799	5.84713	5.66678	5.53365	4.96498	5.87997	5.31572	5.06947	4.99257	5.29954	5.87926	5.2129	5.6105	5.76637	6.00625	5.16282	5.51308	5.51252	5.4102	5.24026	5.6186	5.12946	6.03374	5.33046	5.69773	5.64793	5.64095	5.30961	5.38404	5.16042	5.50823	4.79298	5.62802	5.1043	5.2957	5.54455	5.42936	5.3802	5.14142	5.05449	5.98114	5.51434	4.94424	5.58895	4.86852	5.22955	5.24654	5.31855	5.69752
AKAP9	5.95302	6.50477	7.31694	5.90493	6.5906	4.9845	6.32326	5.95606	6.80114	7.03123	6.87277	4.61182	5.75199	7.09111	7.03504	5.47381	5.91959	6.4921	5.73331	5.45768	6.25273	7.35991	6.36464	4.93962	6.72676	7.15692	6.52215	6.33078	5.14444	5.51428	6.43004	6.58169	6.12119	7.17677	5.13712	5.72912	4.01868	4.50219	6.76392	6.252	6.57307	4.74996	4.68288	6.71396	7.08672	6.04879	5.87429	6.28347	5.62914
AKIP1	7.98833	7.75971	7.07064	6.89457	7.16587	7.70357	6.60259	6.78589	7.0194	7.33195	7.25064	7.46867	8.41715	7.27618	7.0443	7.29146	7.93649	7.24034	7.39243	7.64108	7.52745	7.21748	8.04204	7.56205	7.37122	7.47147	7.41683	7.55509	7.44334	8.65767	7.78517	6.78535	8.39449	7.15947	8.38303	7.43375	7.19262	7.62195	7.44618	7.3453	7.57838	6.96188	6.96619	7.3019	7.00955	7.5058	7.33624	7.3791	7.59983
AKIP1 /// NUAK2	11.8616	12.0196	11.9718	12.0109	12.0867	11.8985	12.0857	11.9873	12.2716	11.912	11.9466	11.8228	10.7813	12.0967	12.0804	11.5821	11.8626	11.9439	11.7639	11.8589	11.8461	11.8306	11.8819	12.0865	11.9741	12.2394	11.9776	12.0515	12.2943	10.6106	11.8579	11.8802	10.9658	12.0467	11.1771	11.8609	11.9548	11.8841	11.8856	11.8141	12.072	12.1044	11.6221	11.875	12.4067	12.0079	11.694	11.6104	12.0081
AKIRIN1	9.79704	10.1561	10.2726	10.2004	9.90416	9.99992	9.96357	9.91524	9.86945	9.85535	10.1393	9.90309	9.80391	9.97201	9.87769	9.92568	9.77928	9.74793	9.56652	9.89653	10.0012	9.99363	9.98384	10.0866	10.0228	10.4495	10.2566	10.1124	10.0998	9.78619	10.0552	9.81803	9.82631	9.96126	9.89345	9.8202	10.037	10.314	9.89677	9.66503	9.78792	10.0153	9.50151	9.85435	10.2344	10.2047	9.91034	10.0675	10.1679
AKIRIN2	8.97635	8.95527	8.98383	9.42787	9.56815	9.21158	9.21614	9.76232	9.52226	8.6607	9.23858	9.16785	8.78369	9.43633	9.98204	9.09037	8.92483	9.53423	8.70775	8.80283	9.11119	8.96846	8.85315	9.28344	9.41767	9.23342	9.53915	9.59776	9.5395	8.96324	9.02362	8.84492	8.56786	9.41695	8.46677	9.5691	9.44783	9.71798	9.45833	8.91943	8.77767	9.56886	8.88073	9.77795	9.35252	9.32623	9.36176	9.31001	8.87555
AKNA	7.79579	7.99512	8.21124	8.23457	7.86794	7.93853	7.68065	7.96282	7.94029	7.88858	8.10829	7.79379	7.69226	8.29303	8.38359	7.77754	8.05923	8.15082	7.3587	7.86409	7.91669	8.09633	8.15987	7.71621	8.31834	8.26699	8.48016	8.20937	8.03036	7.54775	7.89662	7.59262	7.71249	8.04856	7.70351	7.81065	8.26243	7.99931	7.78885	7.8765	8.1303	8.17219	7.60326	8.27809	8.06181	8.54423	7.75643	7.68025	8.12
AKNAD1	2.73329	2.60157	2.29088	2.81672	3.7448	2.53974	2.98549	2.90261	3.03113	2.94097	2.7107	3.126	2.76414	2.26129	3.13993	2.90675	2.61938	3.1457	3.87767	2.55728	2.78254	2.63211	2.58924	2.78023	3.02041	2.60128	3.07186	2.48179	2.81575	2.70802	2.37246	3.56532	2.40494	2.64221	2.25147	2.47058	2.87801	2.79431	3.6409	2.82489	2.30384	2.2777	2.98139	2.71936	3.36998	2.84473	2.39932	3.28265	2.78316
AKR1A1	10.2976	10.137	10.1337	9.2441	9.60812	10.3801	9.78443	10.0975	9.59544	10.1486	9.79166	10.0853	11.0742	9.83696	9.66297	10.2465	10.0821	9.89261	10.1078	10.5307	10.4715	10.3111	9.96213	10.5215	10.1309	9.91445	10.1466	9.77199	9.60942	10.8258	10.1488	9.89825	10.9965	10.1373	11.0486	10.2833	9.8054	10.3135	9.97251	10.2153	10.2846	9.51825	9.93147	10.1112	8.74673	10.2001	9.69741	9.83218	10.232
AKR1B1	10.2341	10.1082	10.0805	9.52816	9.553	9.49932	9.57879	9.77771	9.64395	10.1959	9.92273	9.82186	10.7094	9.63114	9.32656	10.035	9.43874	9.88474	9.77366	9.95986	9.81517	9.21914	10.0692	9.67728	9.69362	9.53825	9.31488	9.62302	9.30424	10.0579	10.2079	9.81754	10.349	10.0713	10.9002	9.75721	9.56814	9.63468	9.70372	10.0764	10.2579	9.11143	9.76763	9.37478	9.20071	9.34942	9.77099	10.358	10.1263
AKR1B10	4.42401	3.74403	3.51359	4.8547	4.14028	3.54418	5.25469	4.53243	4.25786	4.76294	3.52802	4.64852	3.80985	4.04003	3.85199	4.29245	3.48258	4.27945	5.99841	3.85355	4.11289	3.85321	3.49345	3.70059	4.09816	3.97096	3.93022	4.62926	4.21336	3.72649	4.39275	4.95071	3.31916	4.78908	3.53078	4.28677	4.79695	3.94252	5.16812	4.46005	3.85966	4.14125	5.33923	4.03084	5.08552	5.48132	4.92265	4.2459	4.19254
AKR1C1	5.49465	4.99925	5.18897	5.65062	5.92608	5.19923	5.65073	5.64055	5.57094	5.44274	4.85407	6.13263	4.86141	5.17556	5.41634	5.50937	5.39699	5.60959	6.11862	5.5545	5.53018	5.41714	5.33791	5.32416	5.29934	5.35194	5.15538	5.88027	5.72106	5.12134	5.82493	5.62869	5.12113	5.99261	5.30906	5.65477	5.78446	5.08546	5.98847	5.81527	5.16388	5.65849	5.93676	5.73834	5.93067	5.7233	6.09172	5.48327	5.09158
AKR1C1 /// AKR1C2 /// LOC101930400	2.86002	2.27111	2.51631	3.56461	2.882	2.59976	3.21994	2.77159	3.66171	3.8231	4.69116	3.71804	2.65172	2.28607	2.38858	3.54273	2.75356	4.26973	4.68553	2.33151	2.62396	2.99704	2.5336	2.8257	2.38253	2.43696	2.43103	2.56408	3.41809	2.62762	2.74236	3.45202	2.28692	2.71198	2.24434	2.22052	3.12487	2.76027	3.31874	3.14238	2.72728	2.52132	3.16101	3.08713	4.01634	3.74522	3.70399	3.14879	2.76664
AKR1C2 /// LOC101930400	4.42465	5.06833	4.97514	5.15456	5.05921	4.89043	3.863	3.83255	4.18856	4.41019	6.20044	4.25078	5.14639	4.91066	4.51107	4.94147	4.7974	5.0625	4.35982	4.90815	4.70087	4.70551	4.3803	4.75698	4.98124	4.76673	4.30217	5.04262	4.98586	5.30488	5.81098	4.53376	5.23475	4.71809	5.24417	4.75801	4.81087	5.00048	4.43868	3.88519	4.75449	5.0426	4.95222	5.37445	4.6124	5.35149	5.1097	4.9876	4.41219
AKR1C3	9.1129	8.61186	8.57362	8.39821	8.3186	8.24669	6.60797	6.86484	7.60326	7.79483	9.3252	5.63096	8.47941	7.0839	7.18286	8.77007	7.70329	8.89932	7.58501	8.97908	8.27548	7.60845	7.78076	8.17462	8.5263	8.17842	7.80873	8.20017	7.7841	8.57606	10.2357	7.50382	8.86473	7.92547	9.94321	7.47451	8.18398	8.43388	6.70896	6.91439	8.11554	8.49461	8.20834	8.70078	7.53247	8.89599	8.47244	8.74084	7.52608
AKR1C4	3.7435	3.12425	3.06157	2.7291	3.62467	3.09078	3.13795	3.2174	3.23548	3.38546	3.22096	3.44437	2.92594	3.15668	3.19206	3.64933	3.01869	3.25046	3.48535	3.20296	3.25327	3.1578	3.09385	3.0678	3.06161	3.07637	3.36069	3.23036	3.27853	3.16379	3.05466	3.42918	2.80778	3.53698	3.41275	3.47297	3.5718	3.81368	3.57319	3.40309	2.86016	2.91765	3.28203	3.3324	3.5062	3.26825	3.36714	3.21135	3.00685
AKR1C6P	3.5807	3.07712	3.09256	3.48556	3.15546	3.22408	3.8251	3.30932	3.48705	3.70574	3.33238	3.58206	3.10979	3.61314	3.192	3.20442	3.03598	4.04414	3.4055	3.04257	3.18051	3.23138	3.14574	3.42328	3.24284	3.28006	3.1629	3.25739	3.12241	3.16888	2.88318	3.49784	3.24411	3.0037	3.3435	3.6105	3.31667	3.54659	3.60242	3.38682	3.0045	3.10432	3.35761	3.22861	3.5525	3.05088	3.21871	2.96587	3.21557
AKR1D1	2.85735	2.3707	2.05662	2.95858	2.90656	2.06715	1.93944	2.56172	2.98822	2.18161	2.20506	2.0849	2.0326	1.8854	2.49503	2.83224	2.67271	1.91998	2.60871	2.11785	2.01309	2.24527	2.26622	1.95812	2.76892	2.29361	1.91246	2.31908	2.47072	1.91337	2.05078	2.31449	2.03458	3.42912	2.05483	3.0878	2.63482	1.82469	2.14885	2.26622	2.72871	2.49623	3.3979	2.26622	2.25878	2.86483	3.78253	3.21562	2.31038
AKR1E2	2.95877	3.24323	3.07817	3.14711	3.2789	3.65539	3.29969	3.65958	3.12086	3.47074	3.32461	3.44537	3.24647	3.32364	3.63743	3.37589	3.32364	3.25739	3.60579	3.54372	3.74475	3.25224	3.48752	3.45591	3.3136	3.38554	3.56453	3.39403	3.28039	3.25138	2.93563	3.7426	3.14123	3.47604	3.66232	3.42285	3.57686	3.35362	3.36359	3.28906	3.53479	3.79961	3.85804	3.36913	3.50251	3.33614	3.55213	3.19491	3.46181
AKR7A2	8.2469	8.15277	7.83593	7.44132	7.21375	8.17088	6.92338	7.50146	7.55374	7.98825	8.16696	7.26473	9.66931	7.87014	7.59186	7.9692	8.18886	7.80757	7.83911	8.17791	8.02683	8.07315	7.94857	8.66375	8.42402	7.98444	8.11218	7.95012	7.56984	8.7889	8.30983	7.44712	8.86124	7.90083	9.18976	8.16097	7.79452	8.42804	7.58458	7.9115	8.26932	7.52192	8.18883	7.83974	6.87742	8.09069	8.5365	7.97275	8.53746
AKR7A3	5.70731	5.47017	5.41778	4.66971	4.89316	5.43239	5.14811	4.76579	5.01961	5.13762	5.45423	5.07942	6.86514	5.3653	5.15637	5.20568	5.42824	5.44921	5.34588	5.38295	5.50929	5.4164	5.39691	5.67452	5.35386	5.43766	5.43129	5.12082	5.1939	5.98318	5.44206	4.94466	6.043	5.14738	6.1997	5.37214	5.14484	5.6232	5.36395	5.2965	5.49051	5.33397	5.34538	5.3757	4.88014	5.22403	5.37751	5.20193	5.65564
AKT1	9.71512	10.0174	9.80114	9.34936	9.57779	9.79435	9.64839	9.65223	9.63478	9.64411	10.7182	9.5423	9.69212	9.76755	9.87909	9.51811	9.55852	9.76113	9.38447	9.96671	9.62213	9.90885	9.43305	9.63902	10.2067	10.2676	10.1259	9.82559	9.74226	9.81637	9.67872	9.58917	9.67013	9.87604	9.70899	9.51614	9.87448	10.1616	9.17653	9.71009	10.0484	9.95223	9.60575	9.94654	9.89149	10.2147	9.74617	9.13346	9.88886
AKT1S1	5.10246	4.87378	5.19375	4.73015	4.15761	5.04661	4.28134	4.6066	4.46722	4.72537	5.13461	3.89798	5.909	5.07762	5.28668	4.09654	4.90514	4.91204	3.95893	4.80208	4.85389	5.19699	4.97915	5.22671	5.42858	5.4395	5.44682	4.84544	4.61957	5.72612	4.5872	3.87821	5.40009	4.67241	5.59619	4.65132	5.14248	5.85076	3.85501	4.1646	5.28493	4.58461	3.68175	4.81372	3.90476	4.14445	3.53434	4.3599	5.2649
AKT2	5.86247	5.47837	5.64778	5.50729	5.50176	5.69395	5.29052	5.18783	5.55482	5.50949	5.62913	5.37087	5.54866	5.39761	5.34127	5.48484	5.3921	5.76635	5.33816	5.63849	5.73813	5.50441	5.47999	5.4234	5.23946	5.62554	5.58721	5.40937	5.49995	5.4394	5.25697	4.96151	5.47176	5.44542	5.75874	5.73449	5.26679	5.53821	5.16439	5.50892	5.81705	5.64131	5.70219	5.7438	5.09963	5.06449	5.54386	5.48574	5.26117
AKT3	6.97027	7.08593	6.85911	6.47107	6.72977	6.83991	6.23111	7.12844	6.27638	6.86315	6.96717	6.11094	7.36567	6.23111	6.51927	6.70783	6.67574	6.63617	5.7773	6.41034	6.23272	6.11405	6.73049	6.79913	7.27108	6.7779	6.49815	6.27592	6.19249	7.12116	7.02181	6.39963	6.56815	6.40287	7.66717	6.73533	6.72533	6.85556	6.49983	6.20442	7.0379	5.38762	6.449	6.54456	6.30215	5.92692	6.56743	7.10415	7.21162
AKTIP	8.9771	9.02317	9.42203	9.43356	8.55099	8.63352	8.82294	9.03406	8.58679	8.68697	8.7224	8.8424	8.35759	8.86431	8.53329	8.47965	9.03271	8.57979	8.57553	8.56367	8.68578	9.34581	8.94929	8.49368	8.93296	9.13448	9.22449	8.46616	9.08832	8.8741	8.66372	8.67366	8.13271	8.2721	8.80353	8.59606	8.81363	9.13159	8.40327	9.08496	9.12341	9.00323	8.71937	8.66877	9.06549	8.66325	8.51149	8.92614	9.05881
AL022341.3	5.62303	5.46146	5.53854	5.41793	5.67698	5.77352	5.82071	5.60739	5.58115	5.4908	5.4684	5.75483	5.32763	5.76179	5.65777	5.28175	5.57134	5.63755	5.91628	5.45438	5.64698	5.57856	5.53552	5.28724	5.76942	5.60523	6.03465	5.86275	5.67514	5.74846	5.43557	5.97442	5.7313	5.89054	5.8826	5.17161	6.10211	5.82808	5.83889	5.50481	5.41523	5.90746	5.5762	5.68065	5.53988	5.75593	5.91521	5.56891	5.78973
AL022344.5	5.14614	4.87571	4.19284	6.05352	7.23417	3.89829	7.16173	5.90551	7.10664	7.04316	3.4771	7.27223	3.77355	3.44477	4.23617	6.80761	3.96313	7.19675	7.86524	4.94152	5.647	5.18649	4.59024	4.98717	4.40249	4.2175	5.03806	4.83955	5.6338	2.63482	6.15245	7.65739	3.22835	5.2153	2.51414	6.06032	4.95611	5.38757	7.10808	5.87805	4.10777	4.2064	5.9929	5.05137	7.61392	6.69022	5.74895	5.12114	4.47553
AL109706	5.00157	5.23046	5.05652	6.67883	5.21613	5.05552	4.90742	5.7364	5.73839	5.67231	5.37769	4.72988	3.51697	5.99213	6.52695	4.93926	6.31172	5.44184	4.55992	5.01211	5.12481	6.16875	5.67802	4.99452	6.5663	6.94221	5.37607	5.539	5.09107	5.68402	4.59765	4.73115	4.55075	5.69613	4.05354	5.72331	5.66547	5.30773	4.98156	5.13394	5.94833	5.48971	4.17048	4.82848	5.42985	6.18012	5.52796	4.90056	5.26162
AL110181 /// RP11-390E23.6	4.80397	5.28551	4.69913	3.93556	4.40947	5.13008	4.53784	4.45461	4.18405	4.67909	5.09956	4.12343	6.30167	5.05106	4.45172	4.61754	5.229	4.40407	4.05367	5.19039	4.42463	4.49367	4.94697	5.11566	4.91475	4.92514	5.1177	5.0623	4.33133	5.67133	4.65925	4.3896	5.39089	4.62804	5.91699	5.07585	5.05481	5.06728	3.96581	4.30165	5.15626	5.07185	4.30769	4.55342	4.38705	4.38661	3.53185	5.05477	5.36902
AL132709.8	2.88091	2.89773	2.65138	3.08378	3.07693	2.84191	4.8065	3.10893	3.06122	3.05466	2.34448	4.7381	3.07086	2.30104	2.7471	3.42394	3.29169	4.26035	4.81899	2.75351	3.52165	3.09117	2.55353	2.99329	2.59238	2.80826	2.68637	2.78088	3.23357	2.62291	2.62409	5.95695	2.6268	3.28	2.54714	3.05293	2.82326	2.93954	5.30773	4.74997	2.66997	2.74433	4.07234	3.03386	4.57813	3.52375	2.89012	2.91997	3.12116
AL133493.2	2.99191	3.23273	3.3061	3.27569	3.65992	3.08349	3.27587	3.62293	3.45984	3.3724	2.97449	3.03197	3.20291	2.88724	2.95713	3.19505	3.15084	3.19142	3.68738	3.21343	3.08229	3.68892	3.04731	3.52581	2.95871	3.21722	3.18145	3.66235	3.64681	3.03649	2.86149	3.57816	3.28602	3.08227	3.21028	3.07327	3.5408	3.11982	3.56419	3.07095	3.72087	2.87884	3.1493	3.07327	3.18214	3.28122	4.21018	3.34969	2.89385
AL590762.11	5.54713	5.42099	5.41665	5.84413	5.0226	5.59429	4.82716	5.40289	5.32355	5.33878	5.87914	5.24217	6.01922	5.2216	5.52169	5.53204	5.37085	5.66991	5.13964	5.71199	4.95089	5.31606	5.58017	5.42842	5.82529	5.60371	5.67867	5.83853	5.87303	6.00373	5.50699	4.68583	5.97628	5.73645	5.49265	5.54279	5.79876	5.43119	4.68478	5.16464	5.3861	5.71347	5.18246	5.3481	5.29881	5.26201	6.1236	5.84656	5.23803
AL831948 /// RP1-197B17.3	4.97062	4.31223	4.54576	4.46235	4.41566	4.75807	4.87639	5.04441	4.3641	4.23042	4.3718	4.71686	3.9169	4.74436	4.92298	4.4406	4.66071	4.49626	4.61057	4.52405	4.86697	5.06106	4.27277	4.94432	4.31442	4.54493	5.23823	4.36539	4.64747	4.19466	4.59746	4.35782	3.62581	4.37403	3.65744	4.93993	5.07791	4.44012	4.74629	4.12708	4.43359	5.39042	4.95984	4.87595	4.67637	4.58335	4.39897	4.69127	4.43091
AL832163	2.11191	2.25676	1.8226	2.46874	3.12054	1.83279	2.17648	1.96224	2.882	1.97852	1.841	2.42974	1.91265	1.98647	1.82805	2.53796	1.73477	4.30286	3.05735	2.75351	2.28488	2.08131	1.857	2.05282	1.70699	1.97344	1.89293	1.93951	2.37671	1.91337	2.37345	2.68691	1.75177	2.31075	1.95137	2.34015	1.8345	2.45147	2.53228	2.49625	2.0816	1.87674	2.65465	2.00164	2.90457	2.91722	3.65777	2.53823	1.88688
AL832615 /// AX747639	4.49685	3.87806	4.19215	4.40721	4.16265	4.72295	4.98339	4.81905	4.20244	3.8696	3.54848	4.49279	3.44268	4.1472	4.31884	4.28534	3.91084	4.1243	4.33321	4.15462	4.08244	3.76806	4.82108	4.00948	3.82866	3.93574	3.64152	4.75567	4.40031	3.89655	4.09959	4.10417	3.76714	4.54545	3.68803	4.51083	3.94288	3.98735	3.89802	3.44527	3.3457	3.94353	4.77871	3.80155	4.30764	4.5472	5.07416	4.54828	4.06653
AL832909 /// LINC00984	10.1817	10.449	10.1758	10.0373	10.6014	10.512	9.94436	10.1151	9.92734	10.4596	10.5476	10.3516	10.2908	10.3702	10.015	9.80495	10.5691	10.155	9.81074	10.1566	9.96299	10.3219	10.5391	10.4311	10.5033	10.5697	10.5357	10.4622	10.3811	10.2951	9.87487	10.2508	10.2891	10.2743	10.4811	10.3381	10.5387	10.5128	10.7177	10.2548	10.3106	9.6468	9.29451	9.99015	10.4923	10.0886	10.5694	9.85393	10.5691
AL832909 /// LINC00984 /// LINC00984 /// LINC00984	9.01837	9.25392	9.15275	8.85436	9.43681	9.31283	8.78952	8.88331	8.8935	9.18515	9.44965	8.90828	9.15101	9.12112	8.98977	8.58352	9.45834	9.04506	8.60581	8.7844	8.79141	9.14204	9.33866	9.22072	9.44272	9.32276	9.41337	9.20909	9.1581	9.11485	8.70691	9.0911	8.97697	9.10479	9.31066	9.16764	9.3766	9.36274	9.40022	9.1268	9.15948	8.40814	8.25576	8.8117	9.15763	8.89581	9.37653	8.70858	9.44523
AL833181	6.69737	7.1781	7.42455	6.3902	7.62434	6.32589	7.03117	6.78122	7.64061	7.39824	5.39806	7.04187	7.49033	7.49899	6.59023	8.73091	6.78856	7.13172	6.68181	6.88077	6.4725	6.43029	7.46014	7.02572	6.53751	6.24513	4.25435	6.79295	6.67115	6.48482	7.0479	7.37518	7.74068	6.74037	6.91006	7.12874	6.30916	6.29889	6.32826	7.46763	6.87591	5.11063	6.71686	6.22103	7.21115	6.43189	6.40589	6.53731	7.24663
AL928742.12	5.62887	4.89041	5.25779	5.47043	5.25975	5.2192	5.20341	5.60173	5.08846	4.89401	5.16864	5.49973	5.24059	5.47376	5.37438	5.38794	4.86264	5.39184	5.20149	5.22656	5.54517	4.88531	5.02264	5.16853	5.36294	5.24068	5.69064	5.24695	5.30594	5.33594	5.13793	4.90406	5.62178	5.50874	5.39542	5.38043	5.63475	5.60403	5.24914	5.13819	4.86399	5.49161	5.39976	5.2242	5.45352	5.30713	5.80098	4.92306	5.24096
AL928768.3 /// Ig alpha 1-[alpha]2m /// IGH	8.69034	8.03517	7.6165	7.94461	6.89567	6.97474	8.51727	8.49918	7.49318	8.01317	7.49332	8.04649	7.72794	7.89713	6.62644	7.87277	8.14917	6.73539	7.69443	8.1303	8.62205	5.83615	9.30302	6.92591	7.45227	6.11668	5.63875	6.30618	6.62313	8.38941	8.23227	7.53383	10.2017	6.42042	7.82741	6.75453	5.51793	6.05615	7.74546	7.64696	6.91794	8.6567	8.83679	6.49174	5.1159	4.59153	8.07882	9.32572	8.64378
ALAD	6.49001	6.70891	6.84758	6.62373	6.07516	6.86623	6.17652	6.51959	6.37297	6.6658	7.12619	6.75106	7.47774	6.74908	6.71106	6.5524	6.77849	6.37947	6.13915	6.71913	6.63324	6.73141	6.96844	6.74848	6.8325	6.97628	6.93623	6.82286	6.32272	7.43283	6.66297	5.95071	7.10271	6.46317	7.42562	6.37538	6.85951	6.75194	6.31646	6.28897	6.87872	6.75571	6.60698	6.60785	6.06346	6.57177	6.41617	6.15032	6.85647
ALAS1	7.74422	7.91782	7.82956	7.97778	7.65829	7.98811	7.37718	8.09459	7.41445	7.41327	9.13027	7.49005	7.66845	8.38249	8.55311	7.1659	8.97964	7.9102	7.17263	8.08575	7.95346	8.23378	7.85284	8.18213	8.12767	7.81955	8.41349	8.48718	8.61337	7.98222	7.68111	6.83574	7.86512	7.3989	7.90723	8.05581	8.32219	8.6219	7.35729	7.44125	7.74087	8.48867	7.36598	8.19018	7.94418	7.9765	7.86539	7.75013	7.95339
ALAS2	6.56738	6.52569	4.92876	5.90447	5.36965	6.99022	5.40325	7.55715	5.28969	6.93754	5.10018	4.99503	7.8709	6.94657	8.17163	4.33148	5.05141	5.26439	5.87469	5.73782	5.90848	6.38218	7.97055	7.42945	5.79962	5.98826	7.45819	5.90416	5.72314	6.67485	5.31479	5.59581	5.98062	4.92202	5.29056	5.42078	4.87192	4.57708	4.22356	4.41406	5.28568	5.63092	6.8297	5.18438	6.61937	5.38659	5.90138	8.09966	5.63047
ALB	3.2738	3.40132	2.84505	3.41011	4.37704	2.89383	3.89152	3.56153	3.67634	3.46015	3.09714	3.70125	3.27916	3.0161	3.20069	4.04839	3.02463	3.61076	3.37357	3.89281	2.98696	3.65536	3.01647	3.18441	3.30503	3.15381	3.22047	3.07421	3.69415	2.81257	3.48561	3.76871	2.80276	4.13938	3.16048	3.80294	3.73116	2.99874	3.86984	3.29363	3.36171	3.66872	4.16668	3.10579	3.8383	3.42384	3.92279	3.95693	3.59855
ALCAM	7.94937	8.03914	7.9219	8.63231	7.82253	7.80894	7.74073	7.23885	7.75666	8.04005	8.18935	8.29557	7.86761	7.55476	7.64484	8.09979	8.26065	7.84749	8.17006	7.73068	8.47594	8.63291	7.80355	7.99546	8.65508	8.57023	8.72881	7.74621	7.88139	8.95684	7.79631	8.55418	8.23355	7.84511	7.98908	7.90703	8.04218	8.24347	7.54577	7.75707	7.86628	7.8526	7.52439	7.29093	8.09121	7.62521	7.6416	7.21909	8.69579
ALDH16A1	6.83924	6.58652	6.42753	5.69798	5.50317	6.28372	6.11349	5.89661	5.8019	6.16962	6.80384	5.91254	6.84658	6.39952	6.30258	6.56173	6.36013	6.41428	5.60316	6.66465	6.25402	6.4151	6.31038	6.45794	6.25226	6.21782	6.14023	6.07858	5.97575	6.58527	6.28491	6.48117	6.75959	6.31849	7.03845	6.19879	6.10899	6.20711	6.01784	6.45978	6.67726	5.91608	6.47868	6.38878	5.23542	5.84813	6.11363	6.10191	6.40666
ALDH18A1	7.49406	7.29664	7.08054	6.40297	5.74575	6.95524	6.23538	6.60847	5.73803	6.87901	6.96091	6.66611	7.57751	6.73355	6.21896	6.98986	7.02489	6.57092	6.33491	6.88082	7.05698	6.39275	7.32226	6.56511	6.56301	6.43863	6.12629	6.19883	6.23406	7.46603	7.42199	6.19484	7.80279	6.61414	8.02757	6.56897	6.65327	6.26164	6.48161	6.80017	7.07199	7.07376	7.12937	6.16906	5.61128	6.15437	6.36913	7.32169	7.22293
ALDH1A1	9.2345	9.57432	9.50668	8.17938	8.78273	9.23021	8.72162	8.82635	9.28471	9.08728	8.41634	8.54661	10.36	9.0246	9.22695	8.60415	8.64084	9.08441	9.85691	9.75905	9.82045	10.5116	7.01488	9.615	9.61082	8.98157	9.94424	9.407	8.75477	10.6505	8.97483	9.45224	8.98584	9.61187	10.8061	9.83573	7.67726	9.4909	9.50319	9.4977	9.23851	7.87937	7.92401	10.0156	8.44324	10.0042	7.74887	6.76789	9.60594
ALDH1A2	4.30054	4.34387	4.46259	4.40464	4.67908	4.40786	4.93398	4.46608	4.21262	4.14463	4.27496	4.63443	4.26792	4.34392	4.4035	4.37959	4.45538	4.87872	4.27247	4.37352	4.7402	4.19657	4.31107	4.3632	4.19004	4.7159	5.01267	4.48724	4.18761	4.35664	4.18761	5.13412	4.01607	4.63531	4.52775	4.54501	4.65715	4.48646	4.55975	4.46223	4.37303	4.78146	4.182	4.18527	4.83622	4.74741	4.62294	4.65358	4.38727
ALDH1A2 /// LOC101928635	3.63356	3.43536	3.89751	4.05348	3.58364	3.59524	3.27611	3.51711	3.49702	3.16976	3.46008	3.44846	3.56001	2.87354	3.5713	3.11167	3.3586	3.42795	2.57064	2.97256	3.22726	4.11026	3.83129	4.14298	3.04766	3.18274	3.3228	3.4004	4.47453	3.3724	3.02199	3.64937	2.79852	3.7738	3.07727	4.17178	4.31676	3.96634	3.05909	3.28273	3.59928	3.98802	2.84126	3.33171	4.00885	3.17711	3.46773	3.09664	3.658
ALDH1A3	3.50008	3.40013	3.02828	3.1123	3.04551	3.27619	3.20941	3.2145	3.16896	2.76412	3.31628	3.02696	3.10085	3.05337	3.10869	3.15849	3.37184	3.38807	3.3731	3.18151	3.04432	3.52596	3.56733	3.64703	3.35183	3.21448	3.4672	3.53078	3.26252	3.08549	2.96968	3.26947	3.03582	3.24348	2.98988	2.93212	3.04413	3.36198	3.42492	3.1226	3.08966	3.25546	3.71064	3.05312	3.09888	2.99578	3.34247	3.41877	3.30999
ALDH1B1	6.50827	6.19465	6.30214	6.55409	6.71711	6.24484	6.81138	6.57015	6.69135	6.4565	5.98817	6.96309	6.57454	6.22963	6.38502	6.69583	6.45193	6.57773	6.81063	6.36443	6.56548	6.13754	6.1858	6.20075	6.31963	6.18406	6.19203	6.39822	6.43182	6.49135	6.48674	6.96458	6.30417	6.79967	6.56921	6.84345	6.54362	6.18524	6.83011	6.57261	6.1898	6.36177	6.98855	6.29127	6.87171	6.52597	6.78205	6.54241	6.20217
ALDH1L1	5.53099	5.32538	5.40175	5.76454	5.68209	5.35031	5.71589	5.62021	6.10823	5.46564	5.26459	5.85739	5.24448	5.39048	5.57967	5.64091	5.37359	5.76749	5.96934	5.19773	5.42019	5.61092	5.39034	5.40843	5.42269	5.48838	5.62032	5.87017	5.76546	5.27661	5.30864	5.79868	5.07575	5.79291	5.37351	5.69425	5.93952	5.65221	5.67926	5.61836	5.28992	5.63044	5.91678	5.55488	5.58294	5.392	5.88316	5.50892	5.39517
ALDH1L1-AS2	4.20469	4.14738	3.99678	4.12846	4.0296	4.30013	4.38333	4.12335	4.65429	4.10347	4.43307	4.55647	4.49377	4.41	4.27667	4.14293	4.06527	4.10475	4.34411	4.28318	4.18948	4.13253	4.22267	4.49006	4.29356	4.33345	4.26055	4.52948	4.21128	4.0598	4.0664	4.4994	3.80366	4.34625	4.05729	4.35963	4.58536	4.33769	4.36819	4.48699	4.18415	4.90239	4.25473	4.11979	4.1028	4.1571	3.93581	3.91037	4.01329
ALDH1L2	2.83722	2.56368	2.96644	2.89596	3.02196	3.19515	3.35964	3.54663	3.17878	3.15572	2.91807	3.51287	3.04061	3.50561	3.08361	2.99339	2.97253	3.47667	3.16177	2.9637	3.4328	2.77455	3.52541	3.19955	2.86214	2.93368	3.15266	3.16003	2.80926	3.62417	2.85915	3.59248	3.34121	2.80731	3.02035	3.4782	2.99339	3.06599	3.36359	3.32659	2.95409	3.29892	3.49996	3.19558	3.16946	2.82216	3.11719	2.96881	2.98789
ALDH2	10.4769	10.2609	10.197	10.6948	9.86084	10.36	10.4992	10.9141	10.6961	10.432	11.0773	10.329	11.578	10.8907	10.6716	10.3584	11.0526	10.5636	10.4458	10.5628	10.6043	10.928	9.14335	10.9723	10.8019	10.6699	10.6011	10.8193	10.1241	11.5052	10.1293	10.1917	11.3853	10.8768	11.6916	11.2347	9.9838	10.7459	9.84282	10.7241	10.8658	9.56973	9.65085	10.9142	10.1671	10.8538	10.1284	8.58326	10.7306
ALDH3A1	4.42401	4.19445	4.33725	4.60276	4.04855	4.61617	4.5363	3.97947	4.29308	4.17886	4.39691	4.2439	4.13905	4.4148	4.66809	4.30046	4.39141	4.45181	4.45943	4.55464	4.2219	4.29956	4.30069	4.58769	4.47014	4.47573	4.91363	4.48529	4.19511	4.46206	4.48912	4.33451	4.65337	4.23435	4.32904	3.90555	4.22723	4.6425	4.19989	3.86525	4.21548	4.61928	4.17895	4.21046	4.06564	4.78142	3.74846	3.43736	4.32474
ALDH3A2	8.09363	7.90396	7.98129	7.13481	7.19199	8.05866	6.73782	7.72379	7.11396	7.87883	8.34551	7.13258	8.81577	7.85541	8.02296	7.85366	8.2189	7.50111	7.34514	8.22584	8.04958	7.97219	7.44253	8.04101	8.1628	7.72666	7.70079	7.91026	7.2503	8.64901	7.76396	7.40151	8.32511	7.40276	8.83009	7.85342	7.48585	8.11078	7.26083	7.40474	8.08163	6.91604	7.54051	7.91861	6.13115	7.96331	7.14153	7.57228	8.04061
ALDH3B1	7.07047	6.69823	6.64526	7.18056	7.26754	7.34053	6.27017	7.24075	7.08457	6.94347	8.34273	6.95655	7.99983	7.61217	7.62772	6.74849	7.90549	6.95271	6.9759	7.20802	7.18211	7.4335	7.01543	7.47909	7.52191	7.37675	7.78661	7.75912	7.1122	8.13025	6.76605	6.39052	7.4274	6.93351	7.80496	7.30742	7.75759	8.2073	7.17917	6.87823	7.24383	7.40061	6.2719	7.87356	6.2409	7.41199	7.00545	6.61782	7.20214
ALDH3B2	3.52576	3.16726	3.3011	3.3409	3.17124	3.29858	3.49788	3.4617	3.54003	3.29311	3.41233	3.65044	3.25121	3.64052	3.4259	3.54652	3.35643	3.72243	3.52523	3.39919	3.20486	3.24559	3.18834	3.32994	3.11947	3.41707	3.49216	3.39574	3.28989	3.46069	3.22439	3.09199	3.13786	3.36211	3.30379	3.6019	3.43586	3.65123	3.10453	3.1843	3.10062	3.67063	3.11131	3.78416	3.47573	3.55686	3.54224	3.26743	3.1293
ALDH4A1	5.90866	5.9224	5.9053	6.11963	5.71342	5.93435	5.78984	5.92825	5.3814	5.81354	6.06428	5.74473	6.13964	6.08573	6.19405	5.25948	6.30469	5.81558	5.47817	5.83625	5.94996	5.99401	5.86417	6.21654	6.17009	5.91458	6.27708	6.29779	5.88786	6.59622	5.55786	5.66112	5.93227	5.89084	6.41756	6.18384	6.35252	6.03045	5.73735	5.65189	5.93599	5.85649	5.51692	5.51114	5.46556	5.82263	5.82807	5.55969	5.77041
ALDH5A1	6.50732	6.50206	6.26863	5.5213	5.70112	6.23677	5.66918	6.35998	5.75235	6.56863	6.40706	5.70985	7.63955	6.43912	6.8331	6.35862	5.81463	6.01713	5.45772	6.23072	6.01973	5.62538	6.48449	6.37462	5.93985	5.83812	6.48705	5.61862	5.60365	6.45227	6.15842	5.9928	6.43053	5.99695	6.85994	5.86067	5.71467	5.6031	5.52205	6.21835	6.20573	5.86634	6.13912	5.58089	5.79271	5.49322	5.71319	6.40801	6.51408
ALDH6A1	5.28943	5.385	5.03149	4.39402	4.48227	5.32433	4.33894	4.97649	3.91529	4.86905	6.73405	4.77501	6.36612	5.07332	5.56675	4.60043	5.01302	4.74723	4.43048	5.40169	5.39876	5.32859	5.17143	5.20452	5.44753	5.31318	4.93442	5.06108	5.21353	6.30824	5.47673	5.06227	5.94296	4.72851	5.99367	4.85294	4.75091	5.36028	4.66308	5.09821	5.17144	4.98379	4.87297	5.13669	3.47137	4.60957	4.6432	4.7942	5.38199
ALDH7A1	5.20808	4.76658	4.7053	4.24309	4.88489	4.57044	5.10752	4.62808	4.71021	4.20462	4.34066	4.8073	5.259	4.64284	4.48195	4.28161	4.62147	4.006	4.66046	4.64507	4.16664	3.75639	4.62305	4.35409	4.51844	4.46563	4.66694	4.42235	4.7019	4.7675	3.87891	4.62497	4.14956	4.74972	4.74745	4.73874	4.68031	4.58579	4.85707	4.4687	4.69438	4.47591	5.30916	4.15434	4.65304	4.25997	4.3013	4.97698	4.36415
ALDH8A1	4.36652	4.30721	4.82955	3.29339	4.41695	4.67043	3.68039	4.2183	3.61076	3.13501	5.311	3.07697	3.99465	4.08752	3.77742	3.88046	4.61835	3.7958	3.608	4.60507	3.69719	3.58603	4.90439	5.23572	4.49295	4.20351	3.27437	3.91776	4.75378	4.06582	4.76492	4.0738	4.91774	4.26986	4.58141	4.47647	3.6987	3.34651	3.91684	4.19823	5.05344	4.89382	4.83663	4.79815	3.51778	3.20875	4.22498	3.65418	3.69167
ALDH9A1	9.40064	9.33958	9.67904	9.2656	9.18545	9.32269	9.29832	9.44913	9.19018	9.54815	9.63757	9.31763	9.77372	9.44122	9.52732	9.54851	9.33758	9.42604	8.92547	9.50662	9.50854	9.29155	9.20003	9.39168	9.73417	9.57824	9.3134	9.51461	9.62907	9.56915	9.30477	9.5146	9.69012	9.29016	9.76862	9.44268	9.67635	9.67898	9.1372	9.56942	9.4805	9.53336	9.49464	9.28109	9.42858	9.39733	9.20375	9.57697	9.67851
ALDOA	12.157	12.0768	12.2794	12.5651	11.9981	12.2667	12.0406	12.1321	11.9937	12.1734	12.2232	12.1492	12.4778	12.4108	12.3448	12.0178	12.4821	12.232	11.9902	12.1507	12.2842	12.3652	12.1419	12.3063	12.5927	12.4721	12.6224	12.342	12.2909	12.7202	11.9697	12.0942	12.5033	12.1066	12.5528	12.2959	12.5728	12.7311	12.1083	12.2488	12.3012	12.4745	12.0625	12.2422	12.1433	12.3454	12.1296	11.9439	12.3294
ALDOAP2	6.31188	5.34666	5.03327	6.58586	7.9625	4.43498	7.45641	7.9139	7.7957	6.51683	4.53211	7.27508	3.34121	4.2712	5.94273	7.31959	6.0531	7.15715	7.68752	6.70039	5.74673	6.11908	4.697	5.02372	6.43953	5.17517	5.38442	6.19053	7.26671	3.796	5.96907	7.35139	3.72328	6.88197	3.95673	6.99158	6.68201	5.16382	6.89838	6.41484	5.19997	5.4706	8.83225	6.50245	7.24762	6.7673	8.51451	7.14558	5.74675
ALDOB	3.11917	2.83404	3.22502	3.35706	3.04126	3.02094	3.6208	3.45437	3.19982	3.11102	3.30812	3.18223	3.10616	3.40909	3.58941	3.02605	3.10594	3.22442	3.54198	3.07173	3.79473	3.4249	3.20982	3.11253	3.26231	3.23625	3.08416	3.66734	3.44991	2.64071	3.03879	3.68114	3.39437	3.5342	3.12466	3.34744	2.9034	3.75152	3.40067	3.72702	3.0361	3.2853	3.66462	3.50983	3.67571	3.4503	3.5666	3.28231	3.35466
ALDOC	7.56384	7.40985	8.00146	7.397	7.10223	7.17825	7.23565	7.6005	7.11132	7.83681	7.55012	6.90687	7.90715	7.26106	7.25777	7.4376	7.51583	7.45512	7.01559	7.44986	7.44976	7.08264	7.28479	7.13668	8.20847	7.68427	8.44819	6.74086	7.50913	7.87839	7.38538	7.64467	7.56666	6.81328	8.23872	7.11367	7.32427	7.27905	6.63911	7.3426	7.61849	7.33777	7.53397	7.08037	6.88478	7.20927	7.1453	7.92166	7.8617
ALG1	5.85608	5.91412	5.66675	5.49748	4.97613	6.23009	5.07906	5.89632	5.31037	5.30809	5.98719	5.32733	6.69627	5.87434	5.70531	5.9453	5.76364	5.54609	5.14039	5.692	5.56186	5.46796	5.82146	5.97029	5.5591	5.50145	5.86319	5.46488	5.43983	6.31187	5.95963	4.59011	6.75437	5.70056	6.9243	5.51598	5.2209	6.00733	5.08468	5.59648	6.11411	5.92658	5.4525	5.61851	4.90845	5.18914	5.25485	5.98433	6.10635
ALG1 /// NAGPA-AS1	4.38865	5.23029	5.01093	4.76775	3.99686	4.79274	4.4829	4.96241	4.73575	4.93544	4.98868	4.43697	5.64866	4.38868	4.35831	4.51721	4.41171	3.97782	4.2755	4.66162	4.24717	4.30554	4.88703	4.62646	4.15993	4.52028	3.44667	4.04206	4.91171	4.67355	4.61663	4.58895	5.12381	4.62978	4.85502	4.17331	4.1102	4.11227	4.31017	4.64765	5.26761	4.40849	5.39356	4.73674	4.00995	4.02883	4.89795	4.9876	5.12869
ALG10	5.20103	5.40569	4.81818	5.00389	5.56067	5.09213	5.29136	4.96555	5.47865	5.43239	5.52562	5.29919	5.4654	4.9661	4.96387	5.09781	5.61471	5.03355	5.22888	5.04255	5.37824	5.25847	5.05818	5.06863	5.0056	4.78491	4.79169	4.93992	4.75619	5.62723	5.28076	5.04164	6.02695	4.82997	5.51822	4.85259	4.89374	5.59127	5.60794	5.08674	4.8968	5.12005	4.75279	4.71444	4.61808	5.25011	4.82816	5.13478	5.40024
ALG10 /// ALG10B	6.0798	6.35061	6.69378	4.8663	5.21241	6.091	5.01997	5.40155	5.70008	6.25765	6.1664	4.9233	5.72418	5.80371	5.46836	6.78739	6.16786	5.13683	5.37812	6.21292	5.86604	5.9121	6.42439	5.66598	5.95416	5.58867	5.57887	5.41137	5.59086	5.66766	6.12284	5.33007	6.31341	5.24258	5.85323	4.80338	5.73533	5.2408	5.31523	6.27162	6.35314	4.91317	5.17765	5.56138	5.13198	4.90357	4.56202	6.21345	6.007
ALG11 /// UTP14A /// UTP14C	7.71185	7.48681	7.15269	6.97078	6.30918	7.36461	6.64065	7.31306	6.59302	7.3225	7.29993	7.0386	8.27347	7.13267	7.17805	7.50342	7.36158	7.09761	6.6046	7.50364	7.298	7.03845	7.37875	7.11348	7.51872	6.76814	6.81686	7.09946	6.96856	8.02078	7.36904	6.91142	7.95433	7.04547	8.31199	7.1779	7.32902	7.35335	6.602	6.95325	7.36627	7.33151	7.52298	7.02072	6.43167	6.93177	6.74558	7.22234	7.40328
ALG11 /// UTP14C	9.34898	9.41557	9.34379	8.9809	9.37931	9.45806	9.19578	9.38227	9.26698	9.39745	9.38208	9.27189	9.39089	9.11701	9.09319	9.4418	9.45278	9.10307	9.25785	9.42249	9.15996	9.3722	9.54087	9.15822	9.21322	9.01255	9.10974	9.39648	9.0745	9.48536	9.69864	9.14414	9.60311	9.44209	9.60366	9.37991	9.31991	9.14529	9.29955	9.43715	9.24979	9.43204	9.12649	9.4423	8.92981	9.09394	9.1004	9.3596	9.44543
ALG12	6.82605	6.2762	6.52799	6.5445	6.35038	6.34632	6.5292	6.862	6.62495	6.47369	6.58535	6.5467	6.86216	6.60827	6.60638	6.239	6.33495	6.52399	6.33785	6.44183	6.29647	6.73977	6.42415	6.25741	6.76765	6.55261	6.68348	6.65743	6.51585	6.49415	6.29274	6.39941	6.49936	6.42691	6.66363	6.32781	6.32591	6.69985	6.39826	6.52961	6.48752	6.72343	6.52799	6.50568	6.3533	6.45989	6.32023	6.52954	6.4904
ALG13	7.58681	7.54828	7.47794	7.03143	6.67638	7.61137	6.2749	7.31289	6.91615	7.25171	7.5438	7.15224	8.23285	7.31411	7.49361	7.41915	7.5273	7.09437	6.99216	7.68656	7.5687	7.32005	7.51131	7.6024	7.78976	7.54037	7.72003	7.21823	6.94841	7.95098	7.5307	6.96339	8.26996	7.42187	7.94254	7.47814	7.09256	7.86409	7.22338	7.33747	7.53051	7.14946	7.28689	7.36731	6.52652	7.38839	7.1001	7.53208	7.80959
ALG14	6.2996	6.33482	6.05469	5.63218	4.25369	6.41252	5.09657	5.55884	4.74339	5.65597	6.35191	5.66725	7.41519	6.64375	5.81126	5.56968	6.61317	5.45725	5.26892	6.163	5.89261	5.94462	6.65663	6.32202	6.26434	5.94252	5.78385	5.67396	5.67787	7.55434	6.20934	4.84428	7.7998	5.03296	7.32201	6.08158	6.00132	6.59373	5.35943	5.56972	6.39534	6.41979	5.34863	5.2459	4.44656	5.82526	5.61123	6.57108	6.38904
ALG2	8.40122	8.45746	8.12065	7.85796	8.03045	8.41169	8.12796	8.2482	7.77027	8.51853	8.41911	8.10693	8.84555	8.05687	8.0164	8.2722	8.49612	8.08289	7.96665	8.43294	8.2121	8.25389	8.44671	8.35435	8.52815	8.28407	8.13437	8.16403	7.9033	8.70208	8.68781	7.95077	9.05042	8.29326	9.07289	8.1654	8.18572	8.27971	8.00591	8.10946	8.3299	8.05875	8.4931	8.12624	7.44183	8.24243	8.04799	8.34729	8.54233
ALG3	8.10921	8.0747	7.67418	6.86169	7.24541	8.06278	6.89196	7.61317	6.94754	7.51589	7.81709	7.41481	8.59137	7.69551	7.57838	7.71203	7.85247	7.3786	7.44413	7.85977	7.75599	7.63651	7.89776	7.95592	7.69972	7.4576	7.54715	7.35101	7.22938	8.66494	8.11182	7.37871	8.81019	7.79863	9.19199	7.64916	7.51379	8.18777	7.55307	7.53105	7.94165	7.53808	7.57744	7.63273	6.51718	7.93811	7.32161	7.93599	7.89452
ALG5	8.33806	8.11447	7.94941	7.64107	6.98564	8.13482	7.48951	7.72631	7.46627	8.20051	8.18361	7.76059	9.10912	7.9768	7.07455	8.33821	8.47689	7.23236	7.95637	8.32413	8.29983	7.92208	8.46844	8.34668	7.94136	7.98656	7.58215	7.64507	7.42961	9.05027	8.44865	6.73056	9.19532	8.2712	9.21734	7.63688	7.37414	8.09473	7.69417	7.93754	8.38776	8.05002	7.53973	7.54019	6.84329	7.67081	7.34781	8.69615	8.57795
ALG6	8.78308	8.79068	8.97229	8.91014	8.34546	8.80022	8.31641	8.57664	8.57977	8.74837	8.96377	8.44222	8.62817	8.77783	8.85795	8.91102	9.11109	8.59573	8.56085	8.8969	8.55185	8.66497	8.69846	8.67592	8.87941	8.71491	8.76264	8.78159	8.43001	8.72156	8.78346	8.04949	8.93038	8.58431	8.81881	8.73914	8.68594	8.8608	8.38249	8.81981	8.83766	8.99006	8.33718	8.7715	8.64455	8.70109	8.30765	8.81672	8.67063
ALG8	8.34653	8.06604	8.3275	7.11063	7.22844	8.03357	7.55228	7.91328	7.12548	8.08678	7.93489	7.72646	8.84438	7.93672	7.94286	8.36209	8.09606	7.38411	7.6104	8.53013	8.14945	7.872	8.23964	7.81291	8.14258	7.91934	7.3198	7.9085	7.82516	8.68083	8.13605	6.81911	9.03116	7.7966	8.8677	7.69474	7.87157	8.12021	7.48072	7.76744	8.10026	7.69373	7.10257	7.59973	6.55631	7.54255	7.45636	8.23722	8.16551
ALG9	7.466	7.58643	7.29881	6.67427	6.30335	7.29756	6.83071	7.03345	6.34122	7.25626	7.47484	6.88706	7.67666	7.13439	6.94268	7.28935	7.479	6.71855	7.23913	7.39687	7.20321	6.89766	7.38182	6.81986	7.01846	6.80497	6.54828	6.54291	6.82723	7.59337	7.5415	6.93959	7.83329	6.91085	7.92889	6.31161	6.95174	6.7088	6.68072	7.26023	7.76065	6.92924	7.25823	6.61279	6.50439	6.82219	6.66855	7.4278	7.33702
ALK	4.20177	4.06288	4.45798	4.25358	4.45214	4.18808	4.68171	4.6623	4.35978	3.93556	4.07083	4.35886	3.94355	3.95418	4.09455	4.32576	4.26936	4.53653	4.65336	4.30293	4.10604	4.17104	3.88018	4.08409	3.90071	4.15018	4.20247	4.05662	4.53484	4.06693	4.2158	4.56256	4.21396	4.79109	4.12624	4.54762	4.4868	4.55488	4.26815	4.1106	3.77605	4.26812	4.63216	4.20133	4.06105	3.89255	4.77691	4.34919	4.00188
ALKBH1	6.13218	6.09877	5.67204	5.60926	6.05989	6.34442	5.55217	5.84969	5.87873	5.64807	5.96719	5.3612	6.30606	5.76028	6.12169	6.00654	6.27678	5.71654	5.46037	5.89283	5.92303	5.92908	6.4657	5.92962	6.35034	5.65443	6.21539	6.13561	6.28924	6.10668	5.91343	5.4444	6.73411	5.79971	6.74188	6.28825	6.11473	6.22649	5.82711	5.97562	5.81631	6.36805	5.58651	6.12434	5.13373	5.93215	5.82822	6.10398	6.14081
ALKBH2	6.67465	6.44557	6.42462	5.04249	5.26305	6.04685	5.2094	5.83806	5.41078	5.97129	5.99566	5.29665	6.76474	6.00764	5.55803	5.86605	5.94326	5.75361	5.56641	6.11358	5.8084	5.71357	6.11557	5.45307	5.86213	5.84692	5.38987	5.39912	5.63879	6.24888	5.80859	4.85407	6.31062	5.54209	7.15002	5.32426	5.79899	6.34612	5.07158	6.11624	6.39398	5.52251	5.5411	5.47443	4.61385	5.92274	5.60717	6.06527	6.14637
ALKBH3	8.39693	8.18996	8.03186	6.83953	7.27882	8.10572	7.6831	7.84783	7.42174	7.95545	8.10742	7.46448	8.92524	7.8479	7.86525	7.98441	7.89408	7.83364	7.96133	7.96791	7.65126	7.86019	8.03951	7.89863	7.89351	7.75446	7.51856	7.07487	7.85695	8.55422	8.15825	7.17528	8.67729	7.61175	9.04584	7.62235	7.8967	8.24608	7.77729	7.79881	8.24467	7.67087	7.96312	7.62626	6.86205	7.84833	7.38755	8.02922	8.10928
ALKBH3-AS1	2.96271	2.97581	3.02075	3.09196	3.48752	3.14568	3.27146	3.57282	3.1805	3.02594	3.09517	3.82602	2.81784	2.99927	2.71	3.00943	3.0316	3.23029	3.62821	3.11083	3.04396	2.84008	2.75526	2.941	2.81713	2.90639	3.16419	3.19077	3.60384	2.79971	2.8994	3.83872	2.76823	3.4194	2.7752	3.36158	3.86122	3.19062	3.82141	3.61742	2.78512	2.79714	3.8495	2.97398	3.42701	3.45455	3.19467	3.27222	2.67009
ALKBH4	5.58299	5.70334	5.38208	5.1281	4.22349	5.49795	4.20426	5.27534	4.93506	5.42153	6.04802	4.59865	6.46833	5.65313	5.50784	4.80376	5.74951	5.0625	4.80592	5.48531	5.71617	5.5125	5.48788	5.4696	5.66026	5.81525	5.64778	5.54015	4.79955	6.54502	5.62044	4.33344	6.29048	4.88976	6.69697	5.21979	4.83436	5.74133	4.82304	5.02544	5.77723	5.61664	4.47912	5.36597	4.89756	5.15631	4.28299	5.05961	5.42859
ALKBH5	9.33746	9.2207	9.23094	8.82996	8.58855	9.17629	8.72938	8.71163	8.66887	9.1512	9.46698	8.82429	9.29808	8.89335	8.73091	9.23246	9.0877	8.82633	8.62675	8.84537	8.88065	9.0938	8.99163	8.92964	9.13461	9.20886	9.23926	8.82246	8.59147	9.77115	9.35989	8.85345	9.61283	9.04629	9.70736	8.56108	8.62466	9.48403	8.83251	9.25651	9.10262	8.93281	8.43348	8.6781	8.86365	9.01735	8.65583	9.3766	9.34844
ALKBH6	6.92525	6.53549	6.12084	6.74055	5.61458	6.62661	6.00177	6.01528	5.969	6.23012	6.85524	6.1925	6.18352	6.29973	6.6116	5.94506	6.39706	6.05531	6.22409	6.47492	6.33876	6.12949	6.59371	6.23876	6.1359	6.35776	6.39777	6.19697	6.22288	6.3598	6.51819	5.7246	6.28786	6.22345	6.4516	6.10015	6.10878	6.63083	6.09361	6.22202	6.65186	6.25534	6.34566	6.06444	5.73474	6.3527	5.82984	6.42758	6.12822
ALKBH7	7.66308	7.5843	7.49592	7.03626	6.46338	7.46483	6.71905	7.18636	6.38227	7.39166	7.6212	6.36756	8.85314	7.36566	7.25302	7.34744	7.11402	7.27912	6.9236	7.52876	7.49742	7.34126	7.59405	7.59689	7.88339	7.70176	7.832	6.66606	7.06857	8.23237	7.19566	6.81346	8.1209	7.1735	8.77481	7.27659	7.2988	8.09108	6.36815	7.48262	7.66296	6.89595	6.88863	7.2184	6.43686	7.3594	6.57038	7.35841	8.02437
ALKBH8	5.95447	5.90001	5.93281	5.56898	6.35783	5.87814	5.92669	6.04718	5.93801	6.51627	5.80711	6.29677	6.02315	5.48095	5.37997	6.5274	5.72287	6.13345	6.48022	6.13417	6.19832	5.52095	5.98287	5.64335	5.85727	5.65353	5.43956	5.66449	5.45379	6.15455	6.63612	6.50462	6.30837	6.19982	6.55652	5.54108	5.69503	5.46663	6.39226	6.04028	6.13396	5.79931	5.85175	5.76591	6.48515	6.16934	5.91535	6.31367	5.85518
ALLC	3.06943	2.66101	2.54733	2.60184	3.26106	3.08151	2.69575	2.84872	2.60937	2.54019	3.02343	3.07427	3.0491	3.44041	2.88473	2.43605	2.54842	2.80316	2.94769	3.24586	2.72594	2.61971	2.64567	2.90769	3.13109	3.14382	3.31645	2.81143	2.77929	2.97749	2.71849	2.69151	2.8558	2.70662	2.93696	2.60017	2.98725	2.93517	2.84609	3.24586	2.81671	3.15183	3.48496	2.85886	2.88932	2.84632	3.01142	3.01827	2.69773
ALMS1	7.2332	6.92381	7.16452	5.5862	5.95757	7.06015	6.13211	7.25542	5.80295	6.90266	7.37559	5.84581	7.50457	6.6602	6.79998	6.58222	7.03756	5.56373	5.93751	7.28236	6.71407	7.09156	7.09503	6.59498	7.23567	6.98043	5.95568	6.77458	6.41666	7.12265	7.3722	5.47151	7.40688	6.95464	6.88608	6.99225	6.23797	5.96853	6.0914	7.15061	7.39259	6.10345	6.49619	6.93248	4.64941	6.34212	6.33867	7.51645	7.03609
ALMS1-IT1	5.50539	5.65509	5.3436	5.95893	6.52771	5.30122	4.76246	5.65661	5.37862	5.50772	5.53575	4.98284	4.27584	5.05115	4.81197	5.59987	5.48746	6.43765	5.48088	5.30038	5.01129	5.86389	5.20087	5.39314	4.71024	4.87374	5.37973	5.32263	5.93175	5.46092	5.67332	6.39052	5.89178	5.9816	5.97303	5.67187	4.93071	4.80494	5.82294	5.27302	5.3999	5.13903	6.18576	5.13123	5.54351	5.13841	6.43721	5.29262	5.31084
ALMS1P	4.64855	4.41063	4.13889	4.40464	5.19439	4.19277	5.29567	4.75852	4.69873	4.34346	4.50235	5.47993	4.48333	4.68591	4.37043	4.60347	4.63629	4.01242	5.14895	4.49277	4.26029	4.52932	4.38736	4.47826	4.4482	4.33835	4.43506	4.50307	5.01596	4.36395	4.23629	5.61721	4.0606	4.88506	4.25092	4.98163	4.5759	4.64617	5.21238	5.61147	4.40929	4.42335	4.96757	4.66807	4.60473	4.67632	5.19843	4.37691	4.42833
ALOX12	7.33946	7.77981	7.17879	7.18426	7.98841	7.68474	5.91323	7.4407	7.04967	7.14291	6.80787	7.69864	7.52226	7.89955	7.82835	5.73393	8.04766	7.09939	5.83904	6.55519	6.11205	7.49432	8.53725	7.40694	8.14343	7.784	8.34685	7.0863	8.23325	7.34072	6.05594	6.00248	5.98385	7.08751	7.30026	7.97692	8.62641	7.69422	8.06385	6.39807	6.57309	6.92248	5.95752	7.84599	7.6145	5.14446	7.97726	7.0742	8.73237
ALOX12B	3.94428	3.65911	3.74049	3.49608	3.33834	3.51609	3.40488	3.71028	3.47101	3.26803	3.55765	3.10603	3.80422	3.60063	3.60856	3.7159	3.65384	3.83945	3.3029	3.52944	3.01139	3.8901	3.68496	3.44967	3.89952	3.49673	3.85175	4.03563	3.91405	3.71223	2.99612	3.13319	3.61991	3.49151	3.93539	3.29944	3.98085	3.57289	3.40372	3.42107	3.81203	3.46753	3.75675	3.6386	3.20857	2.85215	3.75404	3.2237	3.95357
ALOX12P2	4.04899	3.72058	3.43239	3.42983	3.80138	3.5981	4.45553	3.56856	4.19771	3.67815	3.50647	3.40511	3.59596	3.90469	3.76069	3.91015	3.40978	4.49472	4.34195	3.77783	3.97568	3.74948	3.80203	3.41462	3.91435	3.94107	3.68387	3.56116	3.88581	3.6705	3.75579	4.02493	3.77783	4.31185	3.206	3.72402	4.02016	4.19771	3.79795	3.56631	3.46534	4.19604	4.12966	3.84391	4.22558	3.70172	3.94593	4.05529	3.44247
ALOX15	6.43121	6.14226	5.15352	3.1248	6.86846	6.95606	4.35017	4.28043	2.70065	5.7619	9.2699	5.00548	3.76316	6.11789	6.72214	4.70751	3.96394	5.35	5.39405	8.35563	4.98872	6.80271	5.66037	6.86206	6.56815	7.12075	5.89753	4.54181	4.12282	2.43197	6.1502	7.13387	6.22236	5.8254	4.32696	5.81173	6.38044	5.69836	4.98175	4.99449	6.68573	5.03627	5.4615	8.02634	3.99101	5.34025	6.81726	3.25755	3.16903
ALOX15B	3.79243	3.4103	3.88709	5.69028	4.16841	4.28664	4.00147	4.1021	4.61902	3.75128	3.99067	3.85672	5.4943	4.40925	5.7801	3.88549	3.60148	3.91142	4.111	4.17663	3.92989	5.58167	3.60796	4.70903	5.12408	3.95622	6.52541	4.67507	4.12411	8.10026	3.88835	4.32989	4.54103	4.16164	5.22035	4.69065	4.25576	5.50563	3.87659	3.86078	4.17206	7.372	4.21759	4.49188	4.25237	5.29889	4.25612	3.34936	4.00882
ALOX5	8.00879	8.2726	8.63568	10.0206	8.60929	8.75314	9.14179	9.04415	8.66986	8.44234	9.25413	8.46508	7.89788	9.07597	9.16075	7.7707	9.04322	8.71259	8.06879	8.38977	9.34268	8.89349	8.49757	9.44291	9.25624	9.35392	9.58627	9.20928	9.12775	8.65038	8.12417	8.45272	7.82409	8.4322	8.06509	9.39001	9.31056	9.46383	8.73531	8.53208	8.86345	9.53313	8.25812	9.41555	9.10371	9.18202	8.69014	7.83045	8.93317
ALOX5AP	11.488	11.5399	12.0936	12.7658	12.0475	11.8838	11.6301	11.4459	12.0264	11.7924	12.0654	11.7309	10.3249	12.2406	12.0147	11.421	11.9526	12.0011	11.6798	11.6994	11.9084	12.1244	12.0741	12.0236	12.2455	12.2691	12.4764	12.3772	11.829	12.0372	11.9827	12.0931	10.9478	12.0612	10.7765	11.8183	12.3497	12.5923	12.1944	11.8157	11.5195	12.4261	11.5118	12.3404	12.4149	12.5186	12.0901	12.2311	11.1734
ALOXE3	3.41419	3.32683	3.22223	3.26835	3.50052	3.25225	3.77637	3.3072	3.58699	3.36056	3.36438	3.3266	3.11808	3.31237	3.30901	3.11074	3.20029	3.40239	3.21753	3.14561	3.1656	3.26597	3.24412	3.38896	3.17353	3.45749	3.18837	3.26053	3.18304	3.42035	3.08518	3.46883	3.06307	3.18241	3.36143	3.70415	3.54177	3.82497	3.50814	3.0817	3.42837	3.33525	3.4268	3.00369	3.15248	3.34515	3.6371	3.39283	3.09143
ALPI	5.42997	5.14098	5.21021	5.06983	5.00122	4.95394	5.09439	5.04103	5.21421	4.95205	4.96035	5.19963	5.28793	5.35707	5.06511	5.07909	5.00711	5.30113	5.10283	4.936	4.82746	4.89883	5.12944	4.91008	5.24172	5.25474	5.46544	5.17504	5.22415	5.08831	4.87385	5.07013	5.05095	5.35325	5.26373	5.10278	5.27346	4.95793	4.86022	4.99737	5.2293	5.21791	5.00347	5.09317	5.28793	4.97454	5.24181	4.94672	5.23433
ALPK1	8.06701	8.12391	8.14222	9.03965	9.07505	8.35409	9.37178	8.84971	9.17431	8.22486	7.80183	8.8541	7.26212	8.65478	8.76149	8.42277	8.42034	8.51451	8.93167	8.52304	8.83586	8.58268	8.19363	8.64776	8.63509	8.61003	8.77102	9.00674	9.12809	7.82899	8.10258	9.0632	7.32684	8.98157	6.89072	9.19721	8.98549	8.5917	8.99334	8.54439	8.51155	8.97058	8.65161	8.71279	9.11162	8.68924	8.72412	8.31044	8.40387
ALPK2	2.6796	2.7289	2.54246	2.83876	2.80447	2.73147	2.99046	2.78083	2.68328	2.62928	2.88168	2.58215	2.5064	3.00711	2.79914	2.64205	2.66315	2.86605	2.93677	2.76098	2.75801	2.60108	2.55346	2.57064	2.63057	2.78933	2.879	2.95433	2.56255	2.6084	2.60369	2.617	2.97488	2.6378	2.97024	2.62623	2.86772	2.8511	2.81982	3.04785	3.2897	3.07753	3.0916	2.75084	2.26726	2.62424	2.84615	3.08377	2.64576
ALPK3	3.93939	4.13429	4.30596	4.66309	4.16644	4.29542	4.41426	4.66776	4.58685	3.73862	4.1272	3.92425	3.7462	4.49265	4.91115	4.44707	4.8112	4.26049	3.63548	3.77044	3.54789	4.58781	4.62628	4.32268	4.67281	4.18433	4.66551	4.59325	5.04275	4.42232	3.92134	3.89305	3.64134	4.66276	4.13395	4.59504	4.81433	4.72806	3.94939	3.9154	4.44331	4.9054	4.35457	5.05052	4.16118	4.03116	4.34985	3.54943	4.52405
ALPL	7.05478	7.36001	7.68987	10.1085	7.38462	7.66954	8.95119	8.71691	8.37983	8.29708	7.78599	7.53274	6.04448	8.6455	9.10503	5.94088	7.92814	7.47419	6.05445	6.64226	9.81853	7.91963	7.83608	8.83149	8.05052	9.13623	8.43609	8.22218	9.14217	6.3552	7.33411	7.96699	5.50618	7.31356	4.6424	9.00013	7.66352	7.67004	8.13371	8.11295	8.30795	9.38387	7.32101	8.11639	8.73129	7.5106	7.81715	6.22141	8.84052
ALPP	5.28491	5.1183	5.21345	5.14032	5.27017	5.14198	5.29981	5.56308	5.70346	4.98289	4.91925	5.43795	4.80584	5.64053	5.19573	5.38415	5.39737	5.6172	5.19975	5.34828	5.67411	5.41329	5.1706	5.04347	5.25463	5.18337	5.57676	5.39941	5.40792	5.12458	5.13586	5.74074	5.01978	5.45838	4.98578	5.47478	5.67548	5.15024	4.8752	5.67502	4.85359	5.25171	5.35364	5.23392	5.14608	5.44171	5.63363	5.65603	5.2646
ALPP /// ALPPL2	5.00157	4.15797	4.49761	4.42786	3.68655	4.61624	4.53914	4.5813	4.37231	4.42812	4.62212	4.49759	4.58884	4.76182	4.53867	4.64555	4.47029	4.44256	4.11599	4.58626	4.80581	4.39109	4.42576	4.30244	4.54355	4.65342	4.8576	4.76777	4.49513	4.78756	4.46617	3.81616	4.54934	4.72496	4.67367	4.70247	4.77527	4.55589	3.70989	4.20687	4.21635	4.81031	4.44599	4.49824	4.40732	4.47585	4.35318	4.36554	4.6333
ALPPL2	4.51908	4.35612	4.75999	4.54329	4.83995	4.10762	5.09513	4.53022	4.62822	4.53191	4.57428	4.97261	4.3959	4.70981	4.85544	4.62998	4.38795	4.80985	4.80968	4.20682	4.6919	4.56952	4.25222	4.51837	4.6082	4.6901	4.99332	4.64752	4.64184	4.35241	4.21354	4.73559	4.57891	4.72066	4.74277	4.59015	4.89258	4.53375	4.49729	4.7971	4.28333	4.82392	4.87612	4.70023	4.82302	4.52674	4.64403	4.42927	4.26229
ALS2	6.20875	6.68926	6.62835	5.44115	4.66566	6.04011	5.49853	6.04161	4.99726	6.47965	7.86584	6.06744	6.90865	5.71352	5.45055	5.8868	6.36309	4.86559	5.6382	6.67914	5.97275	6.46661	5.51484	6.92948	5.8352	6.62087	6.5284	6.40452	5.76535	7.12649	6.75411	4.27796	7.00264	5.73906	7.19133	6.11516	5.50292	5.85421	5.47848	5.27627	6.58831	5.86347	4.73726	5.80238	6.10479	6.45832	4.84283	5.99044	5.92438
ALS2CL	5.68475	5.95589	5.92702	4.62325	5.0596	5.5157	5.36498	5.52545	5.25687	5.16276	5.24235	5.2165	5.36597	5.49579	5.68619	5.49687	5.21927	4.83084	5.35198	5.61476	5.30948	5.25582	5.17046	5.41598	5.4833	5.21426	5.31494	5.19015	5.17182	4.75796	4.95417	5.49766	4.77714	5.42501	5.29274	5.20055	5.60513	5.1249	4.92944	5.15132	5.78937	5.03451	5.37164	5.40948	5.01804	5.16058	5.53981	4.94617	5.47034
ALS2CR11	3.04359	2.78058	2.34737	2.86847	3.12807	2.52309	2.98821	3.60102	3.47436	3.06262	2.7911	3.33955	2.10082	2.54724	2.77075	3.40728	2.71266	2.97848	2.82808	2.63788	2.6929	3.06316	2.32487	2.57561	2.82131	2.75129	2.70135	2.61348	3.06688	2.33054	2.6702	4.29443	2.35263	3.54335	2.44613	3.17862	3.1467	3.07016	3.26872	3.03992	2.53688	2.43535	4.26015	2.79827	2.76901	2.71959	4.08805	3.20425	2.5785
ALS2CR12	5.10528	5.48303	5.12092	4.74554	4.95327	5.94407	5.46019	5.36083	5.40257	5.39167	5.10886	5.35137	6.22642	6.10219	7.26569	5.36925	5.06771	5.56783	4.72717	5.45852	5.18872	5.41453	6.2691	5.55644	4.94384	5.21983	5.74399	5.56489	5.43698	5.12737	5.10879	4.87074	4.86139	5.64932	5.1069	5.05402	5.61172	5.04394	5.1032	5.136	5.74662	5.38378	5.23219	5.1246	5.42338	4.88295	5.38767	5.8819	5.06576
ALX1	3.20583	3.36996	2.76924	4.29273	5.55174	3.23273	4.18475	3.36298	5.02408	5.02964	3.01143	4.1298	2.87789	3.14733	3.23482	4.34959	3.0168	6.07455	5.31887	3.24378	3.97046	3.55585	3.03084	3.28133	3.03606	2.94542	3.20978	3.47889	3.24855	3.47725	3.84027	5.42524	2.80179	3.42036	3.30986	3.20897	3.95852	3.55297	4.73708	4.19	2.98382	3.10435	4.16982	3.25719	4.73623	4.80337	3.78316	3.57758	3.03889
ALX3	4.64528	4.71088	4.55197	4.89357	4.76815	4.63251	4.93099	4.42739	4.58802	4.44657	4.76803	4.22539	4.56535	5.0774	4.90602	4.63473	4.73835	5.06185	4.55273	4.47312	4.71659	5.48413	5.16921	4.87271	4.90354	5.08369	5.00985	4.88928	4.91286	4.8415	4.44715	4.31457	4.55691	4.50353	4.872	4.01324	4.83436	4.72011	4.48704	5.10308	5.00071	4.78623	4.30386	4.49814	4.58953	4.74091	4.27014	4.91424	4.86281
ALX4	5.58896	5.55665	5.28133	5.32778	5.53112	5.25048	5.35038	5.46784	5.07836	5.13215	5.53694	5.82226	5.36336	5.53802	5.55379	5.20449	5.33823	5.00482	5.06944	5.3171	5.34825	5.35345	5.47583	5.50028	5.44773	5.78506	5.68719	5.37369	5.16877	5.17494	5.34439	4.86369	5.2371	5.24125	5.56776	5.39971	5.5776	5.5175	4.91598	5.27661	5.43666	5.83435	5.47476	5.49674	5.23332	5.13389	5.34874	5.17887	5.41591
ALYREF	7.05358	6.89776	6.3198	6.4161	6.34053	6.82629	5.75687	6.73543	5.45019	6.35588	7.01175	5.93346	7.82232	6.44247	6.24153	6.58852	6.98593	5.87455	6.2944	6.92356	6.42504	6.74121	6.50704	7.12267	7.27693	6.52753	6.45761	6.61191	6.50718	7.87945	6.71493	5.83882	7.96984	6.31247	7.7492	6.73904	6.92659	7.65109	6.23799	6.23039	6.73362	6.89011	6.54264	6.66761	5.18753	6.42361	6.18461	6.70104	6.8635
AMACR	4.84627	4.48035	4.90206	4.75592	4.30844	4.57749	4.74326	4.77775	4.2698	4.59315	4.56469	4.87218	4.46123	4.63777	4.58798	4.82894	4.61495	4.03085	5.06991	5.07622	4.66606	4.64385	4.1424	4.28252	4.73623	4.9154	4.70928	4.23303	4.26562	4.65501	5.15225	4.60246	4.78279	4.72267	4.80378	4.44002	5.09571	4.67088	4.59626	4.57887	4.28634	4.86504	4.74254	4.72389	4.91963	5.04807	4.58684	4.59224	4.48803
AMACR /// C1QTNF3-AMACR	6.23639	6.35373	6.58419	6.9258	6.03412	6.33564	5.83581	6.87308	5.87862	6.04753	6.16329	5.02586	5.30272	6.09726	6.66893	5.1325	6.62763	5.61254	5.6193	6.06294	5.71459	6.08079	6.03577	5.87983	6.39857	6.31874	5.06557	5.85209	5.79628	6.25863	6.26415	5.55142	5.94303	5.06743	6.32038	6.24652	6.37794	6.63	5.77752	5.46656	5.63746	5.4799	5.20958	6.05526	5.99908	6.64513	5.40526	6.20092	5.88836
AMBN	5.15331	4.61657	4.80504	4.79512	4.99767	4.74888	5.15442	5.20109	5.2386	4.97298	4.7851	5.37391	4.29191	4.85176	4.70806	5.3977	4.64052	5.18841	4.52908	4.72571	4.90158	5.11893	4.7634	4.96859	5.1129	4.91702	5.43169	5.14519	4.8363	4.68866	4.64383	5.13975	4.48763	5.0113	4.68377	4.89013	5.46925	5.05916	5.20602	4.94267	4.75279	4.82639	5.03144	5.01267	4.93314	4.657	5.06137	4.73044	4.79506
AMBP	3.68734	3.52264	3.29797	3.45081	3.68952	3.55082	3.46086	3.4779	3.4707	3.38238	3.47345	3.77757	3.44125	3.62818	3.75914	3.43241	3.69388	3.79493	3.60737	3.45416	3.6955	3.5886	3.50947	3.43975	3.65275	3.66622	3.65047	3.60426	3.4518	3.69723	3.56066	3.53063	3.5449	3.55059	3.95271	3.72539	3.78032	3.53747	3.35256	3.41187	3.49373	3.71989	3.55765	3.66314	3.45748	3.27548	3.57866	3.32651	3.73068
AMBRA1	5.8845	5.71288	5.71964	5.71772	5.98404	6.12672	5.80718	6.05483	5.7888	5.66472	5.67541	5.81644	5.58236	5.73105	5.65404	5.91969	5.72922	6.18602	5.91788	5.83597	5.90888	5.87197	5.94208	5.63837	5.8503	5.92265	5.82352	5.95911	5.74716	6.03915	5.94691	6.2128	5.94621	6.00884	6.05086	6.09339	5.79878	5.73086	5.97251	6.06631	5.72603	5.93126	6.13945	5.87998	5.64135	5.65454	6.17802	6.38868	5.92725
AMD1	10.5726	10.6747	10.8004	10.2051	10.9734	10.7193	10.7721	10.8396	10.6747	10.6445	10.7269	10.6813	10.1573	10.6433	10.9218	10.492	10.3938	10.6448	10.467	10.5722	10.5376	10.6491	10.5569	10.3793	10.9191	10.9715	10.5315	10.7239	10.955	10.0983	10.6083	10.5132	10.0825	10.6723	10.2167	10.7606	10.926	10.8526	10.5803	10.4345	10.2208	10.7154	10.5277	10.6342	11.0879	10.8674	10.9369	10.3718	10.6018
AMDHD1	5.51814	5.35448	5.54968	4.62582	5.33593	5.71127	3.90004	4.69695	5.3729	4.65781	5.29748	4.57122	5.99421	4.96835	5.40658	4.98913	5.32802	4.66361	4.55027	4.90084	4.45487	4.41965	4.69466	5.25003	5.5066	5.28194	5.17579	5.8192	4.04908	5.20613	4.78375	3.39581	5.63763	4.83761	4.40522	3.95289	3.96971	4.69977	3.95513	3.42605	4.45627	5.08106	4.42712	4.60334	3.58365	5.37412	4.85272	5.21371	5.03102
AMDHD2 /// CEMP1	5.74521	5.81935	5.6751	5.73452	5.48658	5.69129	5.64759	5.6523	5.85737	5.5933	6.1376	5.9777	5.59687	5.907	5.9691	5.40078	5.74975	5.72976	5.5077	5.63346	5.62029	5.79439	5.6268	5.64914	5.94744	5.74538	6.15726	6.13833	5.63478	5.70803	5.40321	5.4581	5.58681	5.64954	5.76255	5.6116	6.01638	6.25045	5.46363	5.54395	5.88712	6.20087	5.78362	5.85092	5.34732	5.6777	5.7142	5.78981	5.56647
AMELX	3.54728	3.18216	3.09594	2.9873	3.54865	2.8805	3.22102	3.07588	3.77728	3.38626	3.14403	2.95363	3.32133	2.73943	2.82764	3.60983	3.13658	3.47552	3.43196	3.14375	3.29977	2.99536	2.89613	2.96676	3.21313	2.88875	3.07399	3.12487	3.49405	2.70363	3.12866	3.99859	2.97137	3.05988	2.66017	3.1748	3.40655	3.27333	3.32709	2.95096	2.88109	3.12552	3.50651	3.47985	3.35343	3.0458	3.67943	3.00714	3.21776
AMELY	2.322	2.27285	2.23043	2.5541	2.44419	2.11805	2.41372	2.20469	2.35355	2.09566	2.31566	2.75727	2.77321	2.33501	2.17712	2.60906	2.31123	3.01501	2.61902	2.4539	2.28503	2.43655	2.10589	2.44426	2.396	2.37619	2.45324	2.20228	2.04548	2.56316	2.15513	2.37801	2.07871	2.68767	2.15144	2.87025	2.63242	2.39898	2.86487	2.32924	2.41418	2.42779	2.65321	2.31373	2.17687	1.91175	2.39858	2.64298	2.08739
AMER1	5.86243	5.92779	5.66906	5.24729	4.55965	5.74314	5.38821	5.74784	5.53707	5.81183	5.24973	5.41656	5.74752	5.24592	5.12138	5.89117	5.35484	4.44033	5.36288	5.93235	5.82457	5.86823	5.56894	5.79694	5.35966	5.24585	5.25134	5.44207	5.13407	6.15302	6.03021	5.50926	6.43174	4.49605	6.40999	5.74046	5.23504	5.5286	5.26461	5.5263	5.54124	5.34359	4.83719	5.58833	4.77525	5.51392	4.89141	5.44732	5.76314
AMER2	2.50427	2.93415	2.38576	4.00613	3.7183	2.77658	3.91239	3.83255	3.55348	3.82431	2.53347	3.60954	2.61313	2.65373	2.54542	3.54101	2.90595	3.95003	3.61346	2.90859	2.93737	2.79336	3.21724	3.22219	2.77932	2.80292	2.71609	2.78629	3.34457	2.48995	3.09374	4.24367	2.67176	3.60198	2.72426	3.22739	2.81744	2.76718	3.63643	3.32815	2.92079	2.91936	4.03722	2.8796	3.77809	3.84725	4.11453	3.40822	3.55817
AMER3	4.58868	4.54413	4.8622	4.90838	5.08751	4.59777	4.69222	4.77114	5.00916	4.34725	4.6411	4.90898	4.62288	4.59419	4.69596	4.80627	4.78701	4.94428	4.76832	4.81711	4.70091	4.56098	4.70995	4.75091	4.54021	5.02693	5.20494	5.0524	4.9212	4.61709	4.45065	5.15048	4.41302	4.96615	4.66489	4.9333	4.65188	5.00308	4.8826	4.80093	4.66263	4.58689	4.95417	4.84901	4.50146	4.56574	5.26234	4.80627	4.64207
AMFR	5.06921	5.31126	5.08085	5.41985	5.09722	5.54175	4.53726	5.10248	4.91324	5.44583	5.74047	4.86014	6.45094	5.42022	5.65108	5.32547	5.45699	5.4702	4.45826	5.04204	5.93824	5.13773	6.07031	5.8147	6.1261	5.97255	6.06858	4.80075	5.168	6.417	4.87086	4.35482	5.53005	5.17357	6.20829	4.90859	5.07518	5.75547	4.54643	4.50904	5.26924	5.39344	5.04488	5.30654	4.28134	4.56376	4.65798	5.16425	6.14883
AMH /// MIR4321	6.13244	5.47843	5.68101	5.52583	5.64292	5.6611	5.90559	5.8662	5.47453	5.84383	5.82399	5.93546	5.97429	5.77102	5.8627	5.75768	5.68577	5.79392	4.6293	5.7699	5.52699	5.51057	5.79845	5.78622	6.15175	6.0648	6.22581	5.80583	5.4173	5.84465	5.54688	5.21343	5.64666	5.89935	6.24447	5.91933	6.45514	6.07339	5.39354	5.79473	5.91019	5.97946	5.82392	5.39084	5.39001	5.17595	5.44489	5.62595	5.91108
AMHR2	4.59355	3.92314	4.27527	4.16216	3.92381	3.92512	4.10782	4.14043	4.40351	4.24347	4.07306	4.68811	4.21803	4.18987	4.27324	4.44243	3.93181	4.13791	4.43818	4.13906	4.13359	4.38151	4.15089	4.04747	4.22836	4.35298	4.21822	4.00669	4.11279	4.05709	3.99657	3.8803	4.08169	3.97444	4.43069	4.43139	4.45094	3.90285	3.90349	4.07631	3.89405	4.30652	3.97188	4.12838	4.52632	3.72604	4.42292	4.28971	4.19256
AMICA1	12.3727	12.3971	12.7798	12.8085	12.7371	12.5388	12.5147	12.5055	12.4986	12.6807	12.8741	12.4339	11.7832	12.9006	12.8848	12.4295	12.3737	12.6398	12.4546	12.6146	12.6635	12.8801	12.4399	12.6905	12.9288	12.9444	12.9321	12.8162	12.7584	11.4557	12.231	12.6763	12.0103	12.567	11.868	12.6688	12.8789	12.7948	12.6648	12.5886	12.6142	12.7365	12.4769	12.9374	12.6144	12.7132	12.4535	12.2712	12.5518
AMIGO1	8.67809	8.60403	8.34857	7.00902	7.3277	7.69725	7.5509	7.70492	7.69151	8.36165	8.36957	7.67778	8.46668	7.3108	7.60845	8.24692	7.54337	8.16749	7.61852	7.9481	7.46617	7.45405	8.27354	6.86238	7.03997	7.24524	6.92877	7.12372	7.54725	8.07106	7.89785	7.57577	7.27609	8.18234	8.94086	7.05709	7.43144	7.08412	7.14211	7.99183	8.4009	7.12745	8.64416	7.44303	7.12552	7.30005	7.52704	7.84216	8.21965
AMIGO2	8.64813	8.60329	8.37236	7.38745	7.46318	7.99959	7.416	8.1542	7.48668	8.04327	8.40718	7.59181	8.1679	7.92172	8.2565	8.01826	8.25183	8.03112	7.23035	8.15766	7.60212	7.25972	8.74999	7.72631	7.57864	7.81674	7.57218	7.56976	8.00001	8.06525	8.18153	6.72757	7.45153	7.98339	8.4528	7.64649	7.84708	7.61551	7.282	7.90493	8.54071	7.84204	7.8571	8.01048	6.74839	7.10831	7.54256	8.91225	8.43122
AMIGO3 /// GMPPB	6.01461	5.45613	5.5148	5.63411	5.72616	5.58952	5.66089	5.67758	5.02877	5.44463	5.73818	5.85731	5.74752	5.87658	5.60679	5.47534	5.5148	5.7283	4.78785	5.51065	5.79316	5.39945	5.34523	5.7216	5.76942	5.68134	5.81739	5.8427	5.30166	5.58324	5.47737	5.61888	5.59955	5.74681	5.65487	5.56389	5.99948	5.80051	5.76655	5.63411	5.576	5.77816	5.79217	5.81618	5.29084	5.33038	5.57159	5.39414	5.37344
AMMECR1	7.25945	7.36233	7.16069	6.91786	6.97843	7.11669	6.90851	7.05447	7.05971	7.29153	6.85832	6.94379	7.43102	7.01959	7.01203	7.44956	7.08265	6.84387	6.9451	7.41871	6.97243	6.80175	7.30479	6.55339	6.96842	7.41888	6.64264	6.58047	6.90712	7.3551	7.29951	7.21813	7.43968	7.23327	7.36416	6.70344	6.78775	6.7398	6.84675	7.25293	7.28251	6.26838	7.26386	6.92577	7.03633	6.41579	6.62953	7.65249	7.19967
AMMECR1L	9.11147	8.94876	8.81351	8.55247	8.86074	8.97624	8.63401	8.78217	8.98127	9.06581	9.23769	8.61984	8.79856	8.8879	8.7756	8.96213	8.95899	8.46342	8.82524	8.83288	9.00444	8.81989	8.95476	8.55446	8.79972	9.06027	8.79266	8.68213	8.74959	8.77095	9.01334	8.84261	8.94922	8.90377	8.90316	8.66201	8.65855	8.63778	8.77925	8.89365	9.06153	8.68536	8.66682	8.92411	8.74659	8.80464	8.46056	8.75868	8.90331
AMN	4.85822	4.54882	4.62148	4.97561	4.67919	4.62649	4.88218	4.7174	4.57479	4.80518	4.49156	5.08135	4.80128	4.80848	4.83281	4.64643	4.68917	4.68613	4.75291	4.52972	4.75871	4.78148	4.52401	4.71668	4.93047	4.89707	5.20346	4.62738	4.40691	4.88412	4.33983	5.19673	4.69101	4.93796	4.78581	4.50162	5.24901	4.67345	4.67318	4.61457	4.61082	5.05671	4.61926	4.30526	4.91258	4.79894	4.45624	4.55192	4.57327
AMN1	7.93175	7.99525	8.76242	8.90327	8.67445	8.20457	8.34003	8.63055	8.26739	7.82255	8.18617	8.3942	7.19101	8.64764	8.76706	7.94842	8.44048	7.83386	7.40902	7.84657	7.82822	8.42418	8.72368	8.67464	8.5691	8.68847	8.7384	9.14749	9.06714	7.20914	7.89767	6.7812	7.22483	8.10458	7.32925	8.74321	8.83095	8.83699	8.40562	7.83382	8.2311	9.24605	6.91613	8.69247	8.77471	8.57015	7.98232	8.55371	8.31617
AMOT	4.33228	4.29288	4.49829	3.9519	4.6031	3.84772	4.19925	4.27621	3.36726	4.14878	4.24427	4.05011	4.40976	3.83559	4.02903	4.28935	4.36066	4.54693	4.35278	3.99449	4.43258	3.92168	3.9548	3.82002	4.23624	4.38788	4.26154	3.674	3.74781	4.62424	4.2046	4.20457	4.3107	3.75161	4.82196	4.14518	3.8305	3.96762	3.99028	4.26828	4.12087	3.98583	3.88162	3.82089	3.82467	3.88106	3.57123	3.92258	4.16189
AMOTL1	4.23398	3.87884	3.86832	3.94807	3.92414	3.93325	4.13539	4.1993	4.22876	4.04107	3.88646	3.68087	4.26936	4.0585	4.19621	3.87477	4.3335	3.64472	4.04226	4.33361	4.36328	3.91133	3.83457	3.86741	4.28555	3.90992	4.12632	4.08291	3.99582	4.69859	3.91188	4.15114	3.96344	4.2729	4.34999	3.96745	4.25366	4.34211	3.91792	4.07857	4.17734	3.97512	4.20073	4.13697	4.17021	3.74891	4.09628	3.97123	3.88377
AMOTL2	3.20253	3.22935	3.01675	3.59088	4.84586	3.42588	3.92798	4.30402	3.88934	3.66987	3.32086	4.0389	3.17986	2.9702	3.73909	3.6155	3.68822	4.17342	4.18624	3.26086	3.57618	3.34406	3.36339	3.33545	3.15167	3.18488	3.122	3.63523	4.23133	3.29809	3.50871	4.43733	3.11415	3.21712	3.40667	3.78244	3.20134	3.62276	4.11758	4.32336	3.01223	3.2127	4.12028	4.09114	3.70373	3.84725	3.8112	3.75853	3.21909
AMPD1	2.87039	3.09551	2.67277	4.24094	4.39507	3.23414	3.65709	3.7471	5.04846	3.9551	2.93585	4.34714	3.12114	3.60887	3.13662	3.1675	3.19778	5.00551	4.66984	3.15149	2.91765	3.49622	3.16111	3.64352	2.78188	3.4803	3.25492	3.577	3.56726	3.19868	3.44945	4.16142	3.24573	3.78636	2.7427	4.22275	3.60701	3.96695	3.76404	3.37078	3.27835	3.57527	3.17088	3.29211	4.47571	4.07046	4.32395	3.48393	2.85043
AMPD2	10.7172	10.7042	10.8203	10.1093	10.338	10.2856	10.4195	10.8401	10.8138	10.8635	10.9076	10.1633	10.2562	10.5566	10.9068	10.3493	9.89219	11.1772	10.1841	10.5479	10.6996	10.5539	9.97442	10.6676	10.8267	11.0847	10.3407	10.1921	10.1732	9.48126	9.93011	10.8916	9.95028	10.6168	9.92324	10.4828	10.4049	10.3413	9.84144	10.3342	10.9305	9.81303	10.7488	10.4521	10.818	10.4014	10.4736	9.18531	10.5661
AMPD3	8.82068	8.81859	9.23043	9.70189	9.23808	9.32505	9.3132	9.58731	9.95882	9.32815	10.3428	9.30059	8.97394	9.58924	9.7428	8.62325	10.818	8.41527	8.12414	9.04481	9.31533	9.70219	9.25228	9.39826	9.33075	9.4882	9.68256	9.71858	9.29318	9.99275	8.68436	9.21853	8.78234	9.21856	9.05074	9.18111	9.59932	9.42713	8.91704	9.22376	9.46926	9.28392	8.90572	9.60053	9.23808	9.21109	9.15719	8.45299	9.68653
AMPD3 /// CAND1.11	5.12234	5.06664	5.25772	5.18718	4.52629	5.00895	4.68005	5.08731	4.8987	5.11886	6.13947	4.75032	4.7475	5.39619	5.47562	4.48614	6.33449	4.60565	3.81121	5.23902	5.45528	5.1671	5.19921	5.59171	5.24623	5.41446	5.50113	5.49703	4.49212	6.0586	4.73063	4.33519	5.36735	5.051	4.9866	4.98163	5.28047	5.51567	4.69232	5.00398	5.43382	5.36046	4.06687	5.40236	4.56421	5.16106	4.11453	4.11086	5.0847
AMPH	4.31554	4.49468	3.87342	6.82359	4.52575	4.4584	4.45407	3.99484	4.32207	4.04469	4.22153	4.36936	4.57687	4.18082	4.12886	4.36472	4.35968	4.14488	4.93417	4.0462	4.49817	4.21734	4.85669	4.40223	4.41374	4.07286	4.07117	3.97116	4.12847	6.15124	4.50222	4.39995	4.88237	4.50197	5.19659	4.45932	4.19414	3.88522	4.6153	4.68784	4.72643	5.41139	4.62946	3.99799	5.27668	4.30187	4.02213	5.08056	3.93131
AMT	7.46943	7.57107	7.29975	6.47556	6.32925	7.54507	6.91204	6.74873	7.21799	7.39517	7.50272	6.636	6.07522	7.41581	7.95864	6.8703	7.20578	7.16857	7.22803	7.62403	7.42126	7.00164	7.54908	7.03605	6.98472	6.96916	6.81431	6.85007	6.83451	5.89055	6.77928	6.78176	5.93658	7.43995	5.39123	6.72222	7.03587	6.20711	6.87797	7.05362	7.76431	6.73163	7.02632	7.12023	6.19478	6.83658	6.29638	7.29726	6.90727
AMZ1	5.31895	5.01584	5.09363	5.01977	5.04633	5.05298	5.12972	5.4908	5.34474	4.94773	4.98144	5.33521	5.02314	5.24965	5.28608	5.12046	5.08136	5.30994	5.3871	5.15976	5.16912	4.95237	5.19323	5.25376	5.34108	5.35097	5.27394	5.43369	5.17211	5.23415	4.95599	5.11961	5.04742	5.22218	5.10937	5.38078	5.30422	5.42685	4.88366	5.03097	5.00896	5.17434	5.09664	5.15606	5.31491	5.14482	5.12518	5.16361	5.26089
AMZ2	9.53909	9.71937	9.56561	9.32224	9.24684	9.52463	9.33045	9.20128	9.12829	9.49645	9.78112	9.20368	9.53923	9.53024	9.43512	9.29719	9.48926	9.24483	9.4796	9.54358	9.59153	9.41793	9.63548	9.29858	9.45032	9.497	9.51035	9.53314	9.64198	9.51545	9.65024	9.36772	9.56557	9.46447	9.64441	9.15219	9.48826	9.80325	9.37706	9.68975	9.80611	9.69749	9.82272	9.3316	9.30796	9.40521	9.32671	9.82595	9.48064
AMZ2P1	8.01192	8.03726	8.08868	7.55461	7.52535	8.4709	7.90599	7.73405	7.74048	8.09398	8.6932	7.74187	8.0631	7.95574	8.01951	7.95275	7.77772	7.20178	7.44413	8.11506	7.95263	8.15637	7.97332	7.93818	7.81401	8.0546	8.23212	7.9797	7.84664	7.99719	8.08167	7.33234	7.86698	7.73455	7.89354	7.76847	8.2211	8.73902	7.64715	7.84961	8.23895	8.19532	7.40201	7.88191	7.88332	8.32634	7.59201	8.05864	7.61817
ANAPC1 /// LOC101930107 /// LOC285074 /// LOC730268	9.58377	9.63017	9.40131	8.88224	9.81103	9.57955	9.99036	10.1212	9.58489	9.34426	9.75888	9.63975	9.40082	9.61757	9.89619	9.23223	9.4812	9.4381	9.04078	9.53242	9.50055	9.59065	9.29192	9.4661	9.48167	9.66136	9.40549	9.35704	10.0745	8.89003	9.39841	9.16678	8.99823	9.53963	8.98839	9.42224	9.62501	9.41657	9.12661	9.5652	9.81614	9.76702	9.51075	9.39096	9.71536	9.84534	9.74984	9.54664	9.51908
ANAPC1 /// LOC730268	7.25709	7.30116	7.23435	6.13038	6.29274	6.88528	6.4464	6.83125	6.54563	7.01387	6.93686	6.64601	7.52027	6.6143	6.904	6.95754	7.10055	6.76403	6.79359	7.10954	6.80253	6.4647	7.2801	6.68753	6.8738	6.55785	6.41292	6.58653	6.6311	7.27364	7.25903	6.3867	7.50793	6.98923	7.62444	6.47098	6.33696	6.35679	6.45102	6.88684	7.36446	6.76802	7.27395	6.60448	5.95024	6.12087	6.7989	7.37371	7.22527
ANAPC10	6.26072	6.27976	5.74664	5.22626	5.18308	6.06931	5.58451	6.03854	5.364	5.86522	6.40454	5.73019	6.88807	6.02475	5.52241	5.81581	6.2562	5.5343	5.80874	6.37595	5.94022	6.16713	6.05995	6.17181	6.0723	5.94896	5.74937	5.65616	5.59856	7.07755	6.43436	5.19121	6.80143	5.60367	7.08674	5.52473	5.55541	6.3399	5.66803	6.12325	6.52541	5.7023	5.7727	5.91373	4.99501	5.97638	5.36304	6.09034	6.26547
ANAPC11	6.756	6.78202	6.54429	6.55861	6.54849	6.98656	6.50235	6.55757	6.45857	6.47705	6.95579	6.67622	7.2989	6.99892	6.61405	6.63534	7.01304	6.57906	6.59905	6.84774	6.71364	6.65458	6.80705	6.71049	7.01227	6.78085	6.79283	6.69051	6.62927	7.18764	6.54532	6.59705	7.39152	6.61566	7.29224	6.69361	6.9485	7.12465	6.23075	6.58507	6.71575	7.1338	6.79476	6.54083	6.18131	6.817	6.3606	6.83678	6.78119
ANAPC13	6.69165	6.44386	6.97091	6.04124	6.72755	6.58223	6.79955	6.78736	7.01248	6.51219	6.73567	6.84105	6.56654	6.50101	6.72596	6.7381	6.45829	6.71271	6.26445	6.40158	6.60632	6.64773	6.5369	6.44917	6.77782	6.8881	6.63438	6.61979	6.68304	6.38539	6.35947	6.47417	6.54805	6.78134	6.50127	7.12249	6.69222	6.93611	6.56477	6.34779	6.47119	6.4626	6.35743	6.35008	6.72154	6.89274	6.50375	6.7257	6.67944
ANAPC15	9.08741	9.10431	9.26653	10.1675	8.48854	9.06464	8.91218	8.88221	8.3221	8.92273	9.27239	8.78854	10.3113	9.20336	8.95704	9.04256	9.71226	8.92676	8.78033	8.91453	9.175	9.21692	9.04845	9.35558	9.38906	9.24672	9.54207	9.04164	9.20503	10.2578	8.92896	8.88935	9.47845	8.86956	9.89695	9.23551	9.46771	9.89275	8.63301	9.27838	9.44252	9.04371	9.12037	8.92866	8.84419	9.12056	8.64717	8.67776	9.54377
ANAPC16	9.66395	9.49177	9.67704	9.54283	9.65794	9.1224	9.75734	9.6165	9.47578	9.56507	9.42358	9.72232	10.0482	9.02958	9.05729	9.79752	9.21923	9.16349	9.91403	9.37654	9.45477	9.29774	9.29565	9.07113	9.40273	9.15179	9.35159	9.3498	9.44497	9.94806	9.36619	10.1702	9.365	9.63796	9.89153	9.41612	9.43055	9.3887	9.8826	9.76286	9.39958	9.31154	10.0195	9.32888	9.74798	9.53308	9.99011	9.53004	9.58423
ANAPC2	6.67232	6.30081	6.50339	6.05842	6.06435	6.30267	6.63889	6.23079	6.33645	6.38637	6.50698	6.5243	6.51528	6.51757	6.24973	6.42216	6.36186	6.7901	6.3913	6.48603	6.57414	6.39208	6.52858	6.68933	6.42158	6.42555	6.54499	6.08354	6.60334	6.37797	6.30436	6.10104	6.21485	6.51919	6.20763	6.67412	6.66911	6.75225	6.49972	6.43929	6.35455	6.54673	6.48677	6.50211	6.41156	6.22163	6.25892	6.15473	6.5012
ANAPC4	10.8181	10.8827	10.7794	10.0349	10.4353	10.8463	10.4734	10.4633	10.6267	10.4545	10.7954	10.7641	10.1159	10.5697	10.6614	10.756	10.7053	10.6709	10.7766	10.7313	10.5759	10.627	10.7843	10.6339	10.2704	10.3215	10.2041	10.5845	10.4787	9.90422	10.7194	10.4345	10.3787	10.419	10.0389	10.1753	10.4094	10.1604	10.5655	10.6063	10.9159	10.5033	10.6084	10.8098	10.3514	10.379	10.3942	10.5861	10.308
ANAPC5	7.8281	7.95331	7.94511	7.01724	7.19471	7.50706	6.97124	7.14837	7.72084	7.68818	7.72776	7.16618	7.57393	7.65752	7.58242	7.71166	7.38786	7.47216	7.60923	7.84246	7.66349	7.58393	7.5434	7.44806	7.41378	7.31501	7.21515	7.28875	7.19259	7.26365	7.55859	6.93525	7.91455	7.51585	7.26435	7.36719	7.34223	7.19195	7.5107	7.73136	7.72802	7.09744	7.65151	7.44679	7.10973	7.38678	7.23054	7.64433	7.37648
ANAPC7	7.90505	8.0207	8.06263	7.37664	7.15918	7.986	6.89461	7.76908	7.44385	7.72342	8.2701	7.55997	8.23878	7.75753	7.7633	7.8088	7.90549	7.35981	6.93109	7.93012	7.66036	7.75426	8.12952	7.80731	7.93801	7.7779	7.51519	8.00295	8.01876	8.09767	7.84401	6.79471	8.16154	7.5232	8.14956	7.46529	7.69493	7.89712	7.09145	7.50831	8.03853	7.99242	7.51493	7.78036	7.16805	7.50415	7.33632	7.96204	7.89696
ANG	7.72127	7.43589	7.22389	7.47374	6.47787	8.18307	6.99181	7.32287	8.14757	6.55853	6.60162	7.45745	8.85411	7.68687	7.69743	7.50527	7.29202	7.6439	7.05574	7.31994	8.13771	7.41772	7.10859	7.7053	7.7572	7.50241	8.04666	7.85124	6.9783	9.35329	7.1229	6.52254	8.30528	7.43585	8.80648	8.02818	7.32829	8.72315	6.94815	6.70146	7.14633	7.3899	5.50875	7.51429	5.98583	8.17821	7.57161	6.95069	7.34828
ANGEL1	7.71862	7.75735	7.4345	6.47694	6.8217	7.75114	6.94233	7.18995	7.30196	7.67662	7.20648	7.02855	7.9772	7.01212	7.01982	7.11367	7.72175	7.05338	6.91463	7.68364	7.39507	7.49494	7.52439	7.43878	7.44892	7.35136	7.01047	6.8543	6.8772	7.66234	7.61872	7.00897	7.79235	6.81029	7.98102	6.9814	6.52603	6.8312	6.82534	7.24433	7.65282	6.78026	7.25932	6.93846	6.58632	7.22536	7.05993	7.53299	7.29026
ANGEL2	6.984	7.00944	6.82071	6.23953	6.47911	7.18199	6.71249	7.20026	6.72571	6.28709	6.9238	7.1329	8.09225	6.53902	6.76741	6.8926	7.48389	5.87574	6.3957	7.08265	6.85183	6.77196	6.76783	7.1704	7.01769	6.99135	6.93773	6.78408	6.6615	7.59048	6.3557	6.83434	7.08923	6.80836	7.31509	6.22588	6.497	6.67656	7.26266	6.47095	6.99193	7.18101	6.94043	6.89962	6.43101	6.56284	6.5769	7.02892	7.15535
ANGPT1	4.42578	4.58782	5.08555	4.43982	6.04213	4.32377	3.21242	4.61662	4.9116	4.8373	4.89246	4.49857	4.1041	4.28506	4.49029	5.33038	4.23106	6.09111	4.32284	4.40903	4.44441	5.1206	4.47623	4.49363	5.76299	5.2935	4.61628	4.94669	4.74902	3.71223	4.88439	4.47402	3.50259	4.84398	4.13069	4.82102	4.83441	4.64714	4.44403	4.65872	4.31511	4.55281	4.66472	5.14275	5.90093	5.92917	5.02312	4.43066	5.18072
ANGPT2	3.70498	3.96868	3.64992	3.62224	4.2444	3.81035	4.45003	3.8888	3.94288	3.82908	3.85948	4.16332	3.99718	3.82717	3.62065	4.0704	3.58735	3.50738	4.60621	3.87647	4.17915	3.86465	4.06897	3.92399	3.98549	3.71245	3.79505	4.03184	3.79397	3.8361	4.12526	4.65305	4.20861	4.18107	3.90383	4.10898	3.71543	4.146	4.22101	4.00861	4.07785	3.74931	4.19933	3.62588	4.21471	4.12006	4.21354	3.94901	3.54627
ANGPT4	4.62923	3.8386	4.68398	4.23276	4.36785	4.04178	4.16324	4.00329	4.18383	3.92125	3.93583	4.004	4.11093	4.30543	4.31033	3.99223	3.82836	3.88774	3.96214	3.38192	4.23005	3.81685	3.81274	4.02855	4.01069	4.455	4.66723	3.80324	4.27745	4.07211	3.92289	3.9593	4.3131	4.384	4.50472	4.50813	4.36027	3.99795	3.7376	4.04006	4.08836	4.78449	3.89135	4.17377	4.2516	3.71796	3.68239	3.98011	4.13013
ANGPTL1	3.90628	4.24096	3.73959	5.18778	5.43296	3.68206	5.33483	4.40453	5.47753	5.21732	3.58822	5.086	3.82828	4.20392	3.98753	5.48365	3.6501	4.68615	5.80963	4.22587	4.70094	3.94684	4.1443	3.99334	3.64779	4.04297	4.26417	4.10262	4.27758	3.51254	4.6079	5.7264	3.70855	5.05601	3.84404	4.4657	3.93001	5.03421	5.20049	5.17015	3.94	4.00791	4.64069	3.93885	5.73614	4.64411	4.51384	4.58434	3.74143
ANGPTL2	3.66511	3.71209	3.72972	3.26904	3.74047	3.29816	3.77436	3.80502	3.91034	3.61131	3.82649	4.03754	3.36868	3.75599	3.80114	3.74544	3.3163	3.70576	3.57464	3.36659	3.45666	3.61653	3.36452	3.61492	3.62881	3.67478	4.06924	3.78636	3.82721	3.23423	3.60605	4.0678	3.50283	4.04511	3.09849	3.80234	3.86402	3.54493	3.67054	3.53636	3.24088	3.84564	4.01034	3.49715	3.49254	3.29147	3.75599	3.49245	3.53958
ANGPTL3	2.56673	2.6796	2.68157	2.88885	4.20658	2.53636	3.87406	2.871	4.07347	3.00176	2.46629	3.6616	2.43915	2.40218	2.46725	2.69627	2.46982	3.16842	4.33556	2.39953	3.31591	2.79224	2.46731	2.54715	2.80251	2.72378	2.77373	2.81997	2.55104	2.52947	3.39176	4.24004	2.31193	2.60359	2.51508	2.55846	2.79159	3.23129	3.57327	3.67047	2.39343	2.70283	3.0788	2.65082	4.48233	4.27404	3.19404	2.66808	2.47354
ANGPTL4	4.85238	4.39019	4.44747	4.47675	4.55247	4.41702	4.53442	4.56013	4.71446	4.51546	4.61173	4.93995	4.60725	4.74927	4.76865	4.71047	4.42943	4.64189	4.86418	4.47811	4.66474	4.55059	4.32218	4.68207	4.77485	4.57311	5.07662	4.69674	4.33071	4.60546	4.37155	4.39836	4.31057	4.61651	4.5679	4.75281	5.04148	5.05554	4.29741	4.60426	4.40468	4.95529	4.73797	4.49442	4.54877	4.61132	4.71208	4.54279	4.51853
ANGPTL6	7.10249	7.07525	6.11308	6.15183	6.71259	7.18755	6.562	7.02882	6.37822	6.08319	6.70812	6.37477	6.38215	6.90311	7.09724	6.38892	6.79632	6.97306	5.92999	6.81433	6.59824	6.63343	7.06194	7.02129	6.17433	6.14122	6.3533	7.33667	7.03428	6.3531	6.77956	5.74818	6.56371	6.56037	6.29994	6.96576	6.88624	7.08889	6.73629	6.3474	6.66153	7.50214	6.29303	7.63955	6.75065	7.1869	6.49316	6.88839	6.41378
ANGPTL7	4.42401	3.90099	4.13108	4.09436	4.22747	3.882	4.27706	3.88525	4.51235	3.88146	3.92607	4.42381	3.94205	4.15049	3.9999	4.27706	4.15049	4.36437	3.65979	4.05197	4.35883	4.18055	4.095	4.08349	4.06736	4.37268	4.07606	4.3219	4.07771	4.25295	4.20071	4.52167	4.05261	4.12031	4.00106	3.93467	4.55671	4.16106	4.29286	4.18535	3.80235	4.24975	3.96722	4.30526	3.95918	4.08289	4.05425	3.97844	4.02598
ANHX	4.3176	4.38711	4.52247	4.30525	4.55544	4.39818	4.5515	4.41643	4.73141	4.48557	4.59065	4.61149	4.23625	4.45003	4.48009	4.39827	4.37936	4.6153	4.30379	4.18708	4.36854	4.35018	4.48251	4.41467	4.28311	4.53176	4.70844	4.70794	4.44299	4.54693	4.3137	4.97016	4.41919	4.61505	4.34588	4.66209	4.80072	4.68584	4.787	4.36525	4.35591	4.8392	4.94821	4.45984	4.35921	4.43464	4.80699	4.55567	4.45308
ANK1	5.83406	5.7302	5.49306	4.96361	4.86434	6.21146	5.13691	5.699	5.06224	6.11794	4.63187	4.79836	8.77371	6.4528	6.91755	4.76648	5.67503	5.30277	5.20591	4.86447	4.97479	5.50501	7.74378	6.55823	5.62411	5.48123	7.33673	4.97997	4.98036	6.20938	4.98175	5.06631	5.78344	5.51337	5.50637	5.74156	5.57293	4.86304	5.21769	4.80158	5.14895	5.06498	5.4525	5.28452	5.6381	4.80848	4.83892	5.96866	6.08279
ANK2	3.05111	2.86034	2.7891	3.23524	3.31708	2.64952	3.40669	3.15614	3.22087	3.21762	2.96809	3.25743	2.74927	3.08644	2.93705	3.48653	3.03503	3.64691	3.41327	3.07129	3.13278	3.04846	2.84601	2.89043	2.93112	3.07404	3.07815	3.14825	3.02133	2.81725	2.90804	4.0862	2.77635	3.31618	2.86594	3.16397	3.21645	3.17295	3.17117	3.60988	2.90921	2.86558	3.57687	2.7976	3.90882	3.09796	3.08483	3.03256	3.2078
ANK3	6.81293	6.53485	6.31494	6.03697	6.36215	5.86478	6.36869	6.74545	5.85851	5.7967	5.79422	6.87351	6.51361	5.73018	6.024	6.70226	5.76151	6.69335	6.67402	6.42287	5.22349	5.62311	5.71297	5.85025	5.73191	4.77048	5.4087	4.90608	6.08544	5.69168	5.86956	6.50773	6.05339	6.26658	6.93699	6.34734	6.40471	5.29533	5.726	6.29098	5.85283	4.59081	6.94995	5.79261	5.29588	5.17244	6.43546	6.70028	6.01237
ANKAR	3.32775	3.23204	3.17416	2.93956	3.4601	3.06962	3.33608	3.17116	3.12391	3.2994	3.39398	3.33233	3.02435	3.22019	3.02348	3.22948	3.24842	3.5436	3.42935	2.95561	3.15361	3.21025	3.27314	3.09555	2.88241	2.94322	3.04759	3.08596	3.06303	3.08011	3.22666	3.5543	3.23875	2.93482	3.19905	3.06128	3.16258	3.27525	3.39945	3.17197	3.29652	3.26612	2.92876	3.00495	3.06302	2.99375	3.15343	3.16305	3.02241
ANKDD1A	6.8635	7.09643	7.80598	7.77025	7.88565	7.70261	6.53465	6.67966	7.66656	7.3064	6.31856	5.82458	5.60065	6.49517	6.56729	6.25751	6.87884	6.03172	6.51638	6.70822	7.82667	6.4906	7.49178	6.78308	6.71128	6.75443	7.74797	6.38753	6.55511	6.26795	6.3463	5.88255	7.82048	7.42882	5.81553	6.27712	7.86981	7.37921	6.5016	5.94177	6.90572	6.82353	6.34687	8.11419	7.48381	6.61278	6.19481	7.71219	6.40926
ANKEF1	5.22426	5.40375	5.98734	4.30708	5.12315	5.30518	5.75944	5.35018	4.57355	5.76574	5.63469	5.71741	5.33838	5.10372	5.05591	5.69712	5.4288	5.47586	6.03355	5.59455	5.57022	5.09527	5.54322	5.04437	5.36021	5.52064	5.2404	5.15353	4.85991	5.27282	6.04113	6.25981	5.29089	5.63173	6.06288	4.97666	4.90473	4.61826	5.78225	6.09729	5.47007	5.19351	5.53426	4.9417	5.97647	5.49906	4.93614	5.76701	5.10198
ANKFN1	3.29695	3.10141	3.12267	3.93371	4.01917	3.28775	4.91964	3.83326	3.6027	3.93987	3.18615	5.13785	3.09648	3.32079	3.26263	3.84382	3.13388	3.67862	5.17551	3.62041	3.85201	3.41477	3.06588	3.35622	3.63927	3.29107	3.55163	3.44651	3.78537	3.21089	3.93232	5.68086	3.24291	4.74505	3.05486	4.2253	4.07172	3.58715	4.57588	4.52492	3.27655	3.36368	4.30949	3.81664	5.10853	4.71366	3.81078	3.58091	3.24342
ANKFN1 /// BC037494	2.48215	2.50183	2.5458	5.50519	6.85721	2.38105	5.5302	3.79906	6.99931	5.78526	2.32424	6.14103	2.36107	2.34937	2.3103	5.70077	2.42083	7.04254	7.26275	3.22885	5.04244	3.43198	2.80642	3.18844	2.29423	2.92688	2.71311	3.25423	2.746	2.76029	5.17922	6.74987	2.30263	4.13682	2.54262	3.62203	2.86697	3.32128	6.15265	5.12358	2.56031	2.55654	4.07725	3.0276	6.57287	6.4765	3.76061	3.7585	2.96904
ANKFY1	5.79638	5.87854	5.82974	5.33408	5.52208	6.24283	5.67066	5.68421	5.73398	5.4505	5.48831	5.53634	5.28995	5.8632	5.94688	5.72852	5.97665	5.51893	5.5205	5.90634	6.02592	6.3221	5.94224	5.96941	5.53707	5.66117	5.931	6.26075	5.73067	5.93593	5.91613	5.22462	6.08223	5.74282	6.09657	5.51572	5.8521	5.92615	5.66256	5.49762	5.86803	6.26562	4.98316	6.24179	5.77733	5.74749	5.41505	5.75176	5.78134
ANKH	5.39954	5.63434	5.88306	4.47203	4.80086	5.16823	4.71609	5.01914	4.43147	5.60186	5.5099	4.52574	6.74365	4.68102	4.92843	4.71344	4.56764	4.97057	5.12464	4.92283	4.93891	4.77348	5.62451	5.32581	4.97828	5.20366	5.47377	4.74609	4.43359	5.17876	5.22904	4.94736	5.58766	5.13734	5.84842	4.92615	4.50672	4.74162	4.16232	5.27684	5.82792	4.64585	4.92055	4.54579	4.56961	4.45826	5.09641	5.19256	5.29058
ANKHD1	7.50153	7.90342	8.08648	7.28666	7.11484	7.83355	7.54875	7.12032	8.22064	7.62943	7.56299	7.6586	7.91154	7.91591	7.82308	8.08447	7.43499	7.41931	7.11931	7.61964	7.48557	7.89042	7.81327	7.9389	7.36417	7.85173	7.45994	7.85312	7.71679	7.09639	7.73064	7.13472	8.02021	7.58843	6.93504	7.77113	7.23753	6.71909	7.33079	7.74074	8.1513	7.77125	7.0512	7.77104	7.99407	7.54255	7.12908	7.98483	7.13472
ANKHD1 /// ANKHD1-EIF4EBP3	9.19887	9.07329	9.22693	9.15301	8.97929	9.16915	9.18319	9.06297	9.01503	9.00874	9.21302	9.03341	9.25177	9.34104	9.26597	9.05756	9.16635	9.28472	8.88596	9.2066	9.19628	9.4528	9.19188	9.28562	9.31368	9.32188	9.26539	8.98953	9.12913	9.19572	9.04351	8.9172	9.37279	9.06671	9.16914	9.08787	9.02758	9.10645	9.02601	9.24251	9.3631	9.18778	9.00864	9.04453	9.16491	9.1512	9.09018	9.02276	9.12214
ANKHD1 /// ANKHD1-EIF4EBP3 /// EIF4EBP3	9.24204	9.29777	8.79922	9.30233	9.02885	9.41315	9.22324	9.36947	8.85968	9.02624	9.08879	9.03549	9.18991	9.3305	9.64373	8.9129	9.15466	9.34932	8.59846	9.23147	9.45028	9.36385	9.31754	9.42156	9.42078	9.22358	9.3485	9.12328	9.44321	8.96187	9.10075	8.68306	9.0958	9.0624	9.31358	9.37623	9.3501	9.44999	9.03713	9.10884	9.16731	9.4342	9.08749	9.39087	9.09263	9.47204	8.81526	8.84927	9.04977
ANKIB1	7.28032	7.10751	7.3705	7.12705	6.71866	7.02424	7.37434	7.04893	6.65759	7.2813	7.41776	7.08306	7.30615	7.19959	7.08627	7.60011	7.208	7.21452	7.05386	7.72634	7.02618	7.35187	7.37529	7.28039	7.34575	6.8652	7.05578	7.41215	6.98951	7.24947	7.63623	7.52456	7.74472	7.07634	7.43561	7.12945	7.05656	7.19243	7.57824	7.53817	7.61199	7.20614	7.28268	6.9205	6.85694	7.18759	7.16776	7.59111	7.12193
ANKLE1	5.96063	5.76526	5.35345	5.27395	5.30307	4.93256	5.20401	5.50741	5.63018	5.46503	6.46553	5.85213	6.12424	4.5117	4.83537	5.03553	5.65854	5.7559	5.35768	5.51054	6.33213	5.54607	6.0013	5.85367	5.00245	5.58796	5.036	5.02083	5.35345	5.77923	5.40086	4.83775	6.04075	5.25183	6.31272	5.71378	5.10291	6.04395	4.94909	5.9332	5.63771	4.96742	4.96489	5.25966	4.74249	5.35291	5.06628	5.00043	5.90238
ANKLE2	7.48403	7.64771	7.46757	7.02169	6.86295	7.57752	6.86105	6.95877	6.84437	7.26332	7.63772	6.56782	7.03998	7.44088	7.64526	7.09652	7.78894	7.24322	6.39367	7.34808	7.26688	7.65516	7.3716	7.35026	7.7284	7.5631	7.66426	7.39158	7.02293	7.20764	7.33008	6.72613	7.48582	7.48703	7.33852	6.9101	7.51883	7.6378	6.90521	7.34812	7.96652	7.73835	7.04645	7.42187	6.85354	7.17059	6.99847	7.04884	7.47407
ANKMY1	5.95352	5.9128	6.03991	5.16586	4.82121	5.97098	5.15204	5.73417	5.52222	5.20572	6.01106	5.26173	6.19317	5.59303	5.70411	5.01016	5.23913	5.26067	4.97414	6.05377	5.81014	5.56115	5.79654	5.31167	5.80927	5.77939	5.745	5.66465	5.67363	5.47594	5.98222	5.12286	5.70206	5.44502	5.66403	5.34055	5.69293	5.56604	4.87766	5.68612	6.1906	5.71679	5.554	5.56902	5.49136	5.56843	5.45622	5.68424	5.70411
ANKMY2	8.19983	8.29954	8.13105	7.80947	7.62728	8.39604	8.04288	8.25325	7.59273	8.12214	8.79413	8.05969	8.67319	8.01843	7.87292	8.03677	8.57377	7.86807	7.90079	8.60143	8.18967	8.24391	8.42111	8.42249	8.13173	8.29264	7.8903	8.19397	7.92048	8.71293	8.4326	7.98107	8.71202	8.48984	8.88488	8.18297	7.96773	8.23551	7.98503	8.28689	8.56308	8.19527	8.59762	8.23888	7.40852	7.96751	8.11458	8.32391	8.20424
ANKRA2	8.07332	8.21859	8.45182	8.03508	7.90894	8.34865	7.35943	8.02921	7.96337	8.0791	8.57425	7.61979	8.07348	8.026	8.14424	8.19931	8.03394	7.75105	7.08523	7.99265	8.13011	7.94279	8.18539	7.93445	8.04666	8.35806	8.24196	8.19025	8.33242	8.04128	8.14082	6.98589	8.00316	8.027	7.71075	7.98404	7.76908	8.30616	7.76798	8.00854	8.35843	8.28114	7.09677	8.16616	7.95231	8.13186	7.5615	8.42979	8.10321
ANKRD1	2.05812	2.35845	2.79441	2.911	3.8265	2.4245	4.62255	3.11274	2.81802	3.22836	2.34671	3.77027	2.34913	2.61902	2.51964	2.93658	2.62916	4.08454	5.84121	3.02573	3.79171	2.92381	2.31434	2.28041	2.46951	2.51886	2.28233	2.8797	3.20755	2.10067	3.15242	5.70142	2.14949	2.91657	2.55529	3.28253	2.86732	2.28233	4.6044	2.83737	2.39343	2.45361	3.52987	2.5122	4.50843	4.06102	2.7266	3.04792	2.47273
ANKRD10	7.58075	7.7325	7.94454	7.37539	7.4218	7.85244	7.20217	7.27126	7.61461	7.78754	7.88	7.44688	7.51771	7.83347	7.78515	7.77076	7.46903	7.24608	7.04258	7.42572	7.60285	7.55774	7.72114	7.4566	7.61833	7.66287	7.56091	7.62294	7.27499	7.30528	7.64546	7.38633	7.79631	7.36706	7.30054	7.48484	7.37582	7.29389	7.35189	7.51677	7.642	7.35761	7.23552	7.46946	7.86587	7.27991	7.3334	7.61292	7.81069
ANKRD10-IT1	7.39576	7.68914	7.50023	7.63422	7.86725	7.49131	8.35631	7.37237	8.2195	8.07355	7.18555	8.39347	6.29121	7.57589	7.54906	7.90894	7.46364	7.95242	8.45862	7.38605	7.80277	7.53694	7.37348	7.42066	7.17953	7.39634	7.36876	7.62702	7.46125	6.63563	7.65666	8.8627	7.01711	7.61421	6.02093	7.40529	7.16772	6.70831	8.51572	8.31268	7.32947	7.31689	8.14211	7.52506	8.53583	7.77496	7.76959	7.8361	7.23365
ANKRD11	8.15639	8.15727	8.07606	8.33906	7.89173	8.12929	8.10157	8.20215	7.70217	8.02187	8.06263	7.79714	8.04494	8.1827	8.23245	7.71445	8.15709	8.2986	7.72424	8.15761	8.09602	8.21732	8.27013	8.12203	8.34927	8.20548	8.41944	8.31427	8.11258	8.27176	7.92169	7.91253	8.18783	7.93836	8.12022	8.33906	8.28758	8.20856	7.77628	8.15476	8.2674	8.28091	8.33056	8.30552	7.97232	7.97541	8.27426	7.84108	8.14724
ANKRD12	9.58848	9.5727	9.78988	9.54984	9.90411	9.43224	9.72735	9.70678	9.97197	9.77585	9.65004	9.55786	8.98038	9.62006	9.68599	9.76486	9.45653	9.54603	9.63926	9.41122	9.50991	9.66282	9.60051	9.52022	9.65273	9.69475	9.49412	9.58997	9.74755	8.93706	9.64374	9.80467	9.12563	9.72016	9.06678	9.73127	9.55549	9.30569	9.51497	9.53152	9.5817	9.55693	9.42727	9.62389	9.85174	9.67322	9.57639	9.63493	9.56367
ANKRD13A	8.96712	9.08286	9.17245	9.35137	9.23413	9.16316	9.13623	9.38696	9.43395	8.88149	9.29245	8.50601	8.32656	9.67527	9.33934	8.78699	9.19139	9.01888	8.87543	9.17417	9.1263	9.52412	9.39692	9.3287	9.31603	9.29107	9.50249	9.38388	9.60581	8.26481	8.98279	9.05111	8.73021	8.99531	8.23282	9.35618	9.27435	8.86964	9.14579	9.08212	9.12603	9.23904	8.74461	9.58879	9.34517	9.16718	9.22612	8.99459	9.18849
ANKRD13B	6.32011	6.2053	5.85718	5.67998	5.19974	6.01725	5.74457	5.54874	5.44723	6.03342	6.22799	5.51708	6.0815	5.72294	5.84717	5.83279	6.26691	6.1787	5.53365	6.3671	6.07653	6.04916	6.208	6.25243	6.00705	5.69268	6.0168	5.96214	5.64066	6.00932	6.62815	5.55542	6.14473	6.58828	5.52211	5.45161	5.8771	5.115	6.30921	5.73527	6.45382	6.21755	5.84485	5.67126	5.54774	5.53094	6.38064	6.19478	6.07193
ANKRD13C	7.14378	7.36829	7.24064	6.69101	6.61447	7.40169	6.40059	6.90462	6.52793	7.47295	7.41119	5.92276	7.3895	6.66815	6.08907	7.52132	6.71697	6.88262	6.68751	7.12162	7.17398	7.06454	7.2676	7.24766	7.06488	6.93409	6.69181	6.32743	6.67073	7.62527	7.63068	6.72605	7.59336	6.8224	7.60656	6.52884	6.75277	7.00147	6.62223	7.15757	7.55689	6.46669	6.62512	6.6029	6.05245	7.1426	5.87377	7.22122	7.21988
ANKRD13D	7.12972	7.33639	7.50005	7.67637	7.15963	7.17612	6.82858	6.91818	7.50675	7.04276	7.59728	6.8653	6.69749	7.57381	7.93381	6.83106	7.40959	7.2653	6.9566	7.23438	7.44639	7.31046	7.26813	7.44047	7.30155	7.65312	7.60103	7.62702	7.35841	6.12823	6.82845	6.65663	6.62377	7.0622	6.13667	7.04905	7.37489	7.06029	6.87621	6.97163	7.6497	7.3454	6.57524	7.62454	7.29011	7.28774	6.39048	6.94157	6.94068
ANKRD16	4.64266	4.38002	4.10604	4.09005	3.55023	4.31513	3.89976	4.25331	4.11315	4.37021	4.38869	4.53909	4.87038	4.42772	4.34601	4.05737	4.09313	4.14184	3.66769	4.10536	4.20936	3.92681	4.31961	4.60997	4.1398	4.08781	4.12637	4.05232	3.93031	4.93307	4.05666	4.0561	4.6014	4.08304	4.99026	4.39032	3.96013	3.7235	3.68457	4.33683	4.1262	4.11254	4.08244	4.10572	3.60847	3.82248	3.78084	4.25662	4.24741
ANKRD17	8.83768	8.68107	8.65567	8.70253	8.53243	8.5963	8.54318	8.7261	8.61215	8.57925	8.56569	8.41225	8.58441	8.51792	8.51332	8.836	8.47983	8.6334	8.28546	8.85747	8.73467	8.61829	8.52937	8.65725	8.55129	8.52315	8.41554	8.47832	8.63063	8.693	8.70705	8.21247	8.82003	8.63805	8.83284	8.56549	8.46096	8.35871	8.38617	8.55947	8.64169	8.43947	8.65262	8.62675	8.40902	8.63911	8.35018	8.62618	8.42971
ANKRD18A	3.91188	3.97846	4.26482	3.89124	4.33167	4.30823	3.83622	4.04613	4.37937	3.24051	4.79477	3.71137	3.90746	4.08059	4.11179	3.91569	5.26528	4.2222	3.62534	3.78755	4.01814	4.49441	4.31069	3.69535	3.83846	4.17123	3.59193	4.67532	4.37676	4.32512	3.67938	4.12563	3.73972	4.23604	3.92256	4.28601	4.34534	3.42031	3.71796	4.40001	4.30112	3.24589	4.87867	4.19792	3.95887	4.22596	4.28063	3.70851	4.00621
ANKRD18B	3.84764	4.13657	4.14306	4.1669	5.12121	3.87295	5.471	4.90396	4.47628	4.72847	4.46686	5.89839	3.73517	3.93383	4.01228	4.59159	4.05519	4.81764	5.7818	4.30187	4.45877	4.39109	3.95324	4.02422	4.21257	3.85853	4.07791	4.28057	4.6741	4.19436	4.58467	6.14831	3.60434	4.74557	3.82097	4.88785	4.4903	4.00232	5.39468	5.02711	3.98809	4.06312	5.50417	4.38472	5.80289	5.3967	5.31817	4.65342	4.15778
ANKRD19P	10.093	9.96477	10.1281	9.94061	9.82632	9.75245	9.66618	9.89099	9.77655	10.0415	10.1057	9.7167	10.1281	9.84051	9.9805	10.0947	9.92408	9.89066	9.9032	10.0072	10.0015	9.9661	9.90985	9.71842	9.98579	9.88511	9.97325	9.64411	9.63195	10.0893	10.0583	9.92305	9.99482	9.99805	10.2198	9.94495	9.96749	10.1632	9.65112	10.2004	10.1262	9.67034	10.0723	9.80261	9.85311	9.87279	9.60862	9.92053	9.79941
ANKRD2	4.42401	4.25239	4.72976	4.8522	4.40952	4.60498	4.66396	4.43193	4.95153	4.48924	4.57811	4.64123	4.56908	4.64581	4.99946	4.3728	4.43739	5.17394	4.4489	4.72748	4.58895	4.62195	4.69471	4.79842	4.62631	4.77403	4.88735	4.66472	4.84917	4.72851	4.25846	4.68203	4.35265	5.27675	4.74478	4.38617	4.18931	4.95358	4.88294	4.57174	4.52457	4.7303	4.35747	4.69325	4.14467	4.54854	4.44632	4.26315	4.65372
ANKRD20A1 /// ANKRD20A11P /// ANKRD20A2 /// ANKRD20A3 /// ANKRD20A4 /// ANKRD20A5P /// ANKRD20A9P /// LOC102723891 /// LOC102725051	7.15944	7.02901	7.51003	5.19385	5.5593	6.20808	5.84735	5.56462	6.27005	6.26478	8.79223	6.44823	7.19407	6.19869	6.10722	6.79053	6.08702	5.82077	6.24683	6.66022	5.8617	7.14284	7.43321	5.82191	6.80723	6.49852	5.75458	6.03871	5.33855	5.77827	8.10951	4.26712	5.82097	5.87714	5.19801	5.27591	6.50887	5.75526	5.95683	7.55382	8.12575	5.67563	6.26621	7.29955	5.41473	5.91286	5.76066	6.68242	5.92616
ANKRD20A1 /// ANKRD20A12P /// ANKRD20A2 /// ANKRD20A3 /// ANKRD20A4 /// ANKRD20A5P /// ANKRD20A8P	5.46334	6.12482	4.28475	7.44708	8.56161	4.10775	8.06948	6.95559	8.79996	7.74978	4.32159	8.37767	3.6386	4.17482	4.93311	7.7151	4.52524	8.23108	8.77924	4.80667	7.23175	6.3691	4.9168	4.68262	4.83101	3.60389	5.43713	4.97565	6.26889	2.82112	6.81696	8.99063	3.45771	6.11344	2.93651	6.69425	4.88312	6.30769	8.31679	7.59176	4.76029	3.87968	7.61407	5.32991	9.01123	7.9193	6.87812	6.2738	4.30305
ANKRD20A1 /// ANKRD20A2 /// ANKRD20A3 /// ANKRD20A4	2.34484	2.57577	2.08775	2.81956	3.31534	2.42576	3.09365	2.61396	3.65021	3.9408	1.9832	2.66259	2.28966	1.88098	1.89664	3.60618	2.25843	3.96169	2.83462	2.20817	2.61019	2.75643	2.30531	2.3078	2.13187	2.03672	2.33446	2.26065	2.02205	2.26742	2.64627	3.99093	2.28089	2.53308	1.89293	2.53612	2.15187	2.98158	2.59292	3.12252	2.30032	2.22285	2.95202	2.52408	4.51714	3.12189	2.52462	2.91519	2.28751
ANKRD20A11P	7.29117	7.06922	7.24613	7.10086	7.21443	6.60858	7.59811	7.25586	7.55105	6.95739	8.04995	7.53138	7.15223	6.95991	7.01171	7.18056	6.74749	7.23775	7.75554	6.83786	6.52466	7.09512	6.90878	6.58079	7.13298	7.034	6.40498	7.15387	6.81128	6.66471	8.27373	7.4302	6.28589	7.30254	6.34246	7.21958	7.18496	6.65361	7.39749	7.36683	8.00476	6.46292	7.17684	7.25464	7.07966	6.78834	7.03202	7.3332	6.57917
ANKRD20A12P	4.51351	4.37643	4.05795	4.67593	5.91314	4.00133	5.25935	5.24184	5.41767	5.05627	4.19231	5.31295	4.20787	4.25178	4.48968	5.37718	4.22881	5.17252	5.89332	4.64403	4.64016	4.19196	4.05718	3.89665	4.77294	4.45773	4.43269	4.7923	5.08767	4.03941	4.93608	5.80685	3.71298	5.43621	4.04695	5.04117	4.80919	4.89086	5.28029	4.98521	4.10335	4.44172	5.80694	4.70414	5.61675	5.493	5.22366	5.14911	4.59551
ANKRD20A12P /// LOC101059949 /// LOC101060632 /// LOC101927345	4.58271	4.10806	3.80017	5.97895	6.65561	4.22014	8.10605	5.36682	5.8049	6.18455	4.91324	7.71598	3.79205	3.48168	4.37922	5.97081	4.52619	5.80952	8.73727	4.61617	6.72492	4.5879	4.8987	4.68906	4.95826	4.31531	4.03381	4.88624	5.84295	3.82258	5.19363	8.41122	4.45634	5.49236	3.07679	5.41366	4.83282	4.44067	7.64471	7.0904	4.27562	4.05011	7.18777	5.21826	7.79774	7.09329	6.48254	4.7899	4.5216
ANKRD20A5P /// ANKRD20A5P	6.88581	7.12644	6.30231	6.97767	8.78662	6.40491	10.632	8.41771	8.5905	8.29346	6.56366	10.6848	6.48218	5.69391	6.48698	8.72166	6.54146	8.1442	11.2029	7.39648	9.03479	6.86878	6.57757	6.32621	6.95921	6.54893	6.13144	7.33355	7.82431	6.05367	7.83296	10.9856	5.3929	8.6772	5.88994	8.40027	7.56423	5.64263	10.3882	10.1178	7.29173	6.43618	10.4334	7.81141	10.6465	9.00148	9.59167	8.52329	7.16413
ANKRD22	6.19169	6.44726	6.92678	9.76238	7.40046	7.63847	6.63012	8.14518	5.04975	5.67313	6.89103	5.99319	6.8419	8.81786	8.11892	5.30302	7.90819	6.74393	7.45542	7.57568	9.61408	9.55607	7.68217	9.72267	8.43747	7.98775	10.1207	8.03186	8.56553	8.72292	7.6708	6.43582	7.78275	7.49424	6.93599	8.05287	8.9112	9.55879	8.01869	7.40679	7.35382	8.69129	7.29363	9.37437	7.22189	7.20248	7.16139	7.69027	7.82374
ANKRD23	4.72679	4.13099	4.85822	3.71406	3.49092	4.26835	3.78432	3.92115	3.7002	3.64905	4.67837	3.86181	3.91676	3.99084	4.20061	4.73693	3.9018	4.29257	3.30997	4.44289	4.36254	3.73297	4.38496	4.55889	4.1897	4.35024	3.69036	3.68835	3.92947	3.81016	4.13642	3.89813	4.09828	4.27979	4.61163	3.85565	4.19788	4.53578	3.44336	3.38244	4.78668	4.23575	3.26609	4.29996	3.84154	4.69116	3.58975	4.46379	3.69129
ANKRD23 /// ANKRD39	5.55506	5.11346	5.14324	5.40371	4.86929	5.2032	5.12231	5.1018	4.90554	4.83131	5.03223	5.23632	4.97974	5.08839	5.4047	4.9509	4.83844	5.01111	4.9341	5.13239	5.09561	5.2318	5.25096	4.75124	5.15902	5.16337	5.16348	4.6379	5.32547	5.07942	5.11649	4.65985	4.88947	5.25219	4.8959	4.90086	5.11383	4.93521	4.54266	4.65524	5.31964	5.25773	5.00404	4.86299	4.80329	4.49503	4.47427	4.77954	5.01123
ANKRD24	5.3222	5.32377	5.2414	5.43813	5.27391	5.31062	5.71144	5.38951	5.3983	5.14792	5.26215	5.39128	5.34157	5.53606	5.54268	5.42583	5.43736	5.36786	5.08051	5.44212	5.3148	5.25934	5.29836	5.45667	5.48823	5.59228	5.64638	5.64631	5.48367	5.53939	5.20759	4.99615	5.19805	5.70146	5.4443	5.61031	5.66573	5.77177	5.1361	5.08554	5.29162	5.77492	5.2021	5.57908	5.13118	5.3611	5.4212	5.33869	5.53433
ANKRD26	4.93482	5.30352	4.82313	4.52679	5.16181	5.3175	5.10262	4.88489	4.69036	4.79554	5.12841	5.02844	5.12261	4.44182	5.11472	4.83274	4.60201	4.49803	4.79033	5.11946	4.98124	4.74179	5.01928	4.79827	4.85929	4.99104	4.56288	4.4322	4.61962	5.33182	5.56857	5.0431	5.5186	4.64994	5.67908	4.70431	4.56729	4.21252	4.46889	4.85647	4.88323	5.17648	4.65763	4.89194	4.97877	4.96293	4.76466	4.75697	4.98598
ANKRD26P3	2.64802	2.91429	3.54676	3.45891	3.29918	2.64804	4.25321	2.98475	3.94392	3.67373	2.74812	4.19386	3.00389	3.01944	2.60543	4.43073	3.02142	3.32228	3.99677	3.05503	3.21424	2.84294	2.82078	2.93907	2.78814	2.78553	3.41066	3.00519	3.21424	3.50821	3.29185	4.82578	2.43493	3.77436	2.75082	3.54305	3.10762	3.42345	4.38462	4.37528	2.77689	3.32322	3.52092	2.87231	4.1748	3.06513	3.63978	3.28855	2.96527
ANKRD27	9.51928	9.43883	9.26082	9.80285	9.42662	9.36981	9.26586	9.64762	9.34377	9.36745	9.87639	9.45151	9.56348	9.27552	9.30646	9.53018	9.52487	9.39342	8.99939	9.46943	9.28285	9.21583	9.35063	9.27285	9.65966	9.41962	9.35981	9.53548	9.63633	9.31094	9.48089	9.42818	9.58785	9.6164	9.81911	9.59875	9.2465	9.45565	9.04616	9.3026	9.42501	9.56717	9.83215	9.65621	8.92699	9.36599	9.71632	9.3169	9.65297
ANKRD28	8.95902	8.94371	8.56896	9.45517	9.54931	7.85996	9.05236	9.28758	10.0055	9.17865	8.2644	9.26656	6.87354	8.38371	8.50936	8.80677	8.709	8.92566	8.51069	8.6762	9.0552	9.07483	8.47924	8.49529	8.44825	8.80418	9.04254	8.60101	9.11605	7.80642	9.14539	8.57984	7.19469	8.31155	7.4538	9.04681	8.90922	8.76835	9.56284	8.44969	8.35191	8.10138	8.11114	8.73377	9.35014	8.29203	9.58471	8.75244	8.79496
ANKRD29	1.99721	1.82984	1.88868	1.86119	2.05952	1.91386	2.03917	2.02111	1.92129	1.86611	1.87834	1.85519	1.94375	1.77814	1.87164	2.2117	1.74676	2.33362	2.14801	1.84469	2.06106	1.73009	1.84759	2.04039	1.80892	1.93119	1.84969	2.15697	1.99824	2.03383	1.75618	2.28476	2.05794	1.86614	2.03509	1.94232	1.8599	1.87957	1.91572	2.07147	1.8779	1.82583	1.94105	1.86585	1.77357	2.00271	2.00505	2.04178	2.04639
ANKRD30A	2.78832	3.74652	2.96494	4.47909	5.22107	2.78815	3.47912	3.56532	5.15098	4.71501	3.02291	4.38977	2.64258	2.89822	2.83536	4.25239	2.93614	6.33904	5.68896	2.81593	3.40995	3.26559	2.93841	3.234	2.93087	2.77258	3.27321	3.25399	3.24081	2.71915	4.56194	4.15127	2.67609	3.50924	2.6171	3.52495	3.12487	3.93845	3.6409	3.76506	3.01956	2.54261	3.75675	3.19242	4.95031	4.79801	3.27129	3.24723	2.61628
ANKRD30B	5.93905	5.48009	4.29591	6.91254	7.93042	3.45161	5.72235	5.92363	8.18712	6.84441	3.36076	5.73128	2.6335	2.5625	3.41513	6.63384	3.566	7.79574	6.97669	5.53794	4.76443	6.01918	3.57949	5.32564	3.03016	3.401	5.19511	4.08559	5.13124	2.79553	5.99833	6.18285	2.58714	6.40878	2.8564	5.89196	4.11751	5.73858	5.83646	5.4357	4.49153	3.21446	5.98797	5.47353	6.82669	6.69027	6.27413	5.51987	3.91519
ANKRD30BL /// ANKRD30BP2 /// LOC100132004 /// LOC100132154	3.53244	3.47029	3.62799	3.54168	4.14388	3.4674	5.87498	3.85599	3.82729	3.61691	3.11895	5.57592	3.40927	3.19487	3.46425	4.16243	3.39409	4.11939	5.74528	3.63569	4.12108	3.8178	3.55226	3.39205	3.60167	3.72404	3.33474	3.62396	3.85569	3.20469	3.63803	6.42306	3.34194	4.00516	3.09168	3.6093	3.4125	3.86257	5.70064	5.53013	3.19509	3.43769	4.67336	3.33617	5.75014	4.53794	4.35603	3.69835	3.62898
ANKRD30BP2	3.43495	3.84629	3.87709	3.76875	4.2018	3.56898	4.85485	4.06976	4.26685	4.04552	4.10923	5.95427	3.48846	3.50728	3.76794	4.34062	3.70778	4.02889	5.8173	3.55957	4.21298	4.02809	3.57582	3.59845	3.66334	4.08999	3.53916	4.2655	4.08665	3.53794	4.04571	5.94861	3.32574	4.96234	4.18074	3.84807	4.05158	3.86543	5.62441	5.56855	3.7523	3.56225	5.61604	4.17119	4.89901	4.22222	5.14547	4.93757	4.23903
ANKRD30BP3	2.86334	3.05607	3.27258	3.97443	3.75927	3.04569	4.41515	3.61357	4.16788	3.97486	3.21958	4.31135	3.00657	2.96381	3.1186	3.90649	3.30985	4.22708	4.15943	3.26154	3.54087	3.4647	2.81708	3.29877	3.32946	2.93197	3.52028	3.47901	3.58545	3.39903	3.60566	4.45375	2.79995	3.55289	3.46153	3.89302	3.40311	3.79422	4.20839	4.04681	3.10796	3.23625	3.89009	3.4537	4.57183	3.45926	3.43434	3.63215	2.99241
ANKRD31	3.0153	3.24051	2.94665	4.16497	5.29099	3.10313	4.68281	3.33119	4.76595	4.505	2.44557	4.29161	3.39388	2.86119	3.05816	3.60618	3.09311	4.81188	5.30411	2.83853	3.59669	3.39759	3.03358	2.62084	2.74691	3.26605	3.35692	2.78817	2.93147	3.22232	4.66337	4.973	3.1607	3.04643	3.02715	3.43487	2.60459	4.33862	5.2361	3.8021	2.85762	2.61896	3.33119	2.91928	5.2047	4.70029	3.03761	3.65666	2.90023
ANKRD32	5.69859	5.78268	5.59441	6.21961	5.82324	5.90399	5.98412	6.45434	6.04502	5.83581	6.14749	5.58395	5.47555	5.77977	6.32439	5.71009	5.84022	5.92032	5.37207	5.58243	5.99393	6.10241	5.94187	5.85695	6.09704	6.10055	6.33447	6.40534	5.34914	5.48827	6.06283	5.71194	5.72665	6.05064	5.50905	5.91838	5.71852	6.07995	5.7158	5.55671	5.70275	6.71407	5.70275	5.92105	6.44188	6.06714	5.87007	5.76373	6.16482
ANKRD33	2.49339	2.18736	2.65322	2.56448	2.58926	2.38618	2.74601	2.45024	2.956	2.57286	2.68819	2.40581	2.40581	2.17348	2.24643	1.98666	2.29147	2.68446	2.41932	2.38699	2.51685	2.28399	2.56533	2.58076	2.291	2.75436	2.39801	2.46917	2.32078	2.40368	2.02623	2.42802	2.30923	2.76045	2.62513	2.67871	2.62559	2.45171	2.63828	2.65253	2.37716	2.51498	2.33829	2.16001	2.22874	2.23655	2.87332	2.0029	2.40299
ANKRD33B	6.26424	6.47347	6.01607	7.43621	6.26952	6.71101	5.68979	6.58537	6.55598	6.00949	7.6366	6.34251	6.64442	7.16514	6.96624	5.97582	7.79399	5.41323	5.53329	6.63237	6.21649	6.79865	6.83664	6.82446	6.81088	6.88284	7.43911	6.81815	7.46039	7.52155	6.15204	5.90555	6.41926	6.01019	6.32873	7.43584	7.37449	7.26901	6.43437	6.40859	6.72926	6.98899	6.05489	7.5854	7.10186	6.19018	6.3953	6.14181	7.46727
ANKRD34A	4.69641	4.37605	4.4353	4.41967	4.46697	4.22139	4.46825	4.24273	4.4017	4.38623	4.58262	4.31612	4.34093	4.57364	4.38076	4.16934	4.4146	4.28776	4.42604	4.31949	4.42946	4.34342	4.6184	4.46627	4.2657	4.18642	4.23681	4.36228	4.29749	4.58837	4.50651	3.95522	4.27144	4.14613	4.28152	4.16259	4.04741	5.0472	3.99264	4.42111	4.59263	4.8915	4.12358	4.36271	3.87334	4.85184	4.15181	4.24581	4.40047
ANKRD34C	2.34818	2.3226	2.46344	2.56423	2.78626	2.31551	3.35808	2.21886	2.20584	2.7032	2.21644	2.55289	2.16592	2.248	1.9011	2.07642	2.22738	2.66924	3.14034	2.23976	2.28624	2.63809	2.28612	2.22611	2.26136	2.13743	2.12468	2.42071	2.35768	2.2009	2.93364	2.7152	2.14098	2.32133	2.37573	2.50246	2.65966	2.72727	3.0436	2.32802	2.18882	1.9777	2.63605	2.12229	2.542	3.06892	2.67745	2.23103	1.94661
ANKRD35	3.67182	3.63693	3.22463	3.8807	3.21445	3.41471	3.76198	3.80439	3.3756	3.39874	3.8474	3.16508	3.30605	3.54255	3.04723	3.15675	3.13748	3.39653	2.95037	3.25081	3.69596	3.64474	3.38235	3.61661	3.76876	3.57441	3.7154	3.36983	2.8325	4.74817	4.01207	3.33407	5.07344	3.29172	4.74029	3.38158	4.54425	3.90668	3.20154	3.71275	4.10494	3.60675	3.21328	3.89	2.99584	4.06385	3.17081	3.04091	3.722
ANKRD36	6.57069	6.78357	6.69641	6.0914	7.0907	6.45125	6.39874	6.25203	6.74343	6.86992	6.46445	6.33592	6.84656	6.57519	6.35009	7.03496	6.76654	7.14823	6.93564	6.69634	6.43959	6.18776	6.8147	6.12936	5.96485	6.13779	5.25371	6.02245	5.85943	6.72377	6.89421	6.75849	6.59258	6.70064	6.46367	6.3425	6.25948	5.99341	6.46894	6.6771	6.82011	5.98848	6.76251	6.08967	6.74682	6.36726	6.28817	7.29685	6.0633
ANKRD36B	8.84939	8.61118	8.93553	8.65	9.48633	8.23556	9.16954	8.87584	9.29849	9.12591	7.37126	9.52758	8.39697	8.23955	7.99836	9.56151	8.42218	9.20674	9.73695	8.86477	8.3612	8.10002	8.75898	7.64866	8.02696	7.79768	7.18489	8.1741	8.89046	7.3974	8.73479	9.57395	8.23528	9.28486	7.57394	8.85036	8.59216	6.92529	9.21403	9.1572	8.58694	7.79101	9.91431	8.49212	9.36172	8.48974	9.51816	9.41868	7.85733
ANKRD36BP2	5.19273	4.77101	4.15993	4.52544	5.98249	5.28393	4.84473	4.61933	6.39979	5.57221	4.12941	5.84644	4.14772	5.34385	4.13306	5.40338	4.66846	5.28174	5.90593	4.79937	4.1483	3.75863	5.70866	3.66319	3.68957	2.77702	3.37107	3.674	4.53766	4.06303	4.71863	4.77798	5.34468	3.7435	3.07262	3.36234	3.61406	4.53691	5.44103	3.88702	3.90382	5.10207	5.28695	3.50712	5.70645	5.32411	4.0522	5.16157	4.07595
ANKRD36C	4.61207	5.17387	5.08932	4.80274	5.89389	5.23212	6.19017	5.29444	6.23559	6.27813	4.60179	5.95559	4.51854	4.40221	4.35101	5.87433	4.88169	5.40971	7.83865	4.48954	5.74789	4.82604	4.44572	4.58918	4.12063	4.83236	4.4476	4.84174	5.24781	4.69971	6.11185	7.14108	5.36686	4.71451	4.18309	4.41953	3.71244	4.94905	6.30156	6.17824	5.10298	4.13432	5.30107	4.62178	7.4379	6.45517	4.96429	5.21937	3.85152
ANKRD37	5.27507	5.00448	4.86967	4.84788	4.9673	5.06158	4.55985	5.19407	4.48526	5.04505	5.2268	4.91744	5.22934	5.02904	4.97798	5.08671	4.92435	4.77782	4.44662	5.0409	4.97335	4.76206	5.07304	4.84995	5.34753	5.096	5.31118	4.61873	4.83077	5.1548	5.16292	5.08308	5.91493	4.86838	5.29671	4.55282	5.08106	5.02151	4.9715	4.81675	5.26901	4.94505	5.07803	4.97074	4.58239	4.70371	4.81325	5.0664	5.04652
ANKRD39	5.34828	5.24337	5.09302	4.78614	4.21451	5.3472	4.94334	5.32314	4.60466	4.68363	5.31406	4.99266	6.00515	4.87453	5.03402	4.84544	5.0179	4.66534	4.66167	5.81833	5.21928	5.00886	5.41285	5.12606	5.07563	5.34025	5.16926	5.26262	4.90344	5.87874	5.03376	4.41148	5.89248	5.41476	5.72984	5.0798	5.04264	4.88566	4.3332	4.67838	5.56121	5.51626	5.26652	4.73103	4.61864	5.00477	4.8791	5.55006	4.84604
ANKRD40	6.29717	6.35746	5.86737	5.77404	5.40506	6.21296	5.99837	6.1771	5.31326	6.3557	6.53742	5.69074	6.84975	5.92826	6.03686	6.17839	6.45596	5.34622	5.57524	6.63202	6.36812	6.06296	6.4137	6.12071	6.27338	6.23311	5.90088	5.71422	6.0887	7.11987	6.55317	5.50803	7.16786	6.05067	7.10548	5.75309	5.46971	6.54421	4.96594	5.52507	6.11493	5.74241	5.30647	5.79068	5.02752	5.87201	6.2958	6.25744	6.29227
ANKRD44	7.73879	7.56748	8.01734	7.53826	7.31622	7.65756	7.68902	7.71251	7.51618	7.67911	8.12092	6.9998	7.39793	8.12393	7.85937	7.77084	7.61716	7.03216	7.11118	7.61953	7.70544	8.26738	8.18407	8.22324	8.00969	8.0723	8.0649	7.95013	7.96239	7.16282	7.41271	7.48539	7.62758	7.58272	7.5017	7.70158	7.67487	7.74402	7.42731	7.91886	8.13032	8.17419	7.51915	7.84036	7.82995	8.01103	7.36667	7.89276	8.02444
ANKRD44-IT1	5.08547	5.54172	5.74752	5.00942	5.14804	5.62782	5.5801	5.26354	6.18895	5.14548	5.2168	6.09057	4.47379	6.11945	5.90827	5.44161	4.90406	5.1664	5.83942	5.80206	5.47938	5.97067	5.85729	5.7154	5.76603	6.14399	5.51043	5.44333	5.69358	4.92702	5.45061	6.1581	5.24122	5.49307	4.55771	5.44404	5.4787	4.97463	5.86804	6.1343	5.32786	5.22632	5.21388	5.67043	6.06393	5.60075	5.52791	5.10465	5.56103
ANKRD45	2.02077	2.37051	2.36771	2.04694	1.94999	3.77486	1.88096	2.33839	2.44385	2.30225	2.00372	3.08982	2.11085	2.59509	2.22722	2.28179	2.55155	2.86605	2.20378	2.38788	2.11267	1.85335	3.34147	1.94668	2.37516	1.92637	2.2098	3.01499	2.21606	2.28972	2.52587	2.42768	3.77101	2.0423	2.38291	2.04542	3.17935	2.27045	2.45454	2.40368	2.04507	4.19373	2.13298	2.08105	2.18058	2.11154	3.13376	4.31241	2.35239
ANKRD46	8.97419	8.7804	8.64814	8.26372	8.64424	8.59427	8.49991	8.4661	8.97399	9.17577	8.64429	8.38074	8.61209	8.25816	7.91878	9.33214	8.95303	8.40144	8.72954	8.49025	8.71197	8.19867	8.792	7.9217	8.75021	8.21223	8.20391	8.0908	8.4257	8.57717	9.06435	8.76548	8.90418	8.85774	9.35252	8.58659	8.21011	8.40076	8.69432	9.00542	8.44439	8.13498	8.53002	8.52026	8.05962	8.39311	8.47489	9.11823	9.13097
ANKRD46 /// GAPDHP62	5.97721	6.06479	6.28551	6.01202	5.53744	5.40842	6.26407	5.77922	6.20764	6.11545	5.50256	6.6097	6.16176	5.53288	4.83006	6.07731	5.42011	5.48954	6.33261	5.81058	6.03297	5.79459	6.33307	5.82366	5.76964	5.67294	5.41963	5.43037	6.12891	5.69455	5.56411	6.98112	6.01422	6.48741	5.82453	5.95899	5.41472	5.00336	6.44672	6.67683	5.87112	5.36858	6.39568	5.98046	5.882	5.10712	5.18582	6.21883	5.99291
ANKRD49	10.0353	9.86285	9.94749	9.58231	9.75987	9.81803	9.73847	9.87755	9.90052	9.92312	10.0492	9.51993	9.29169	9.77744	9.75359	10.008	9.68262	9.68953	9.5893	9.67496	9.83262	9.68414	9.84728	9.49417	9.74534	9.79973	9.6469	9.81831	9.85637	9.23959	9.79677	9.76573	9.37279	9.92157	9.48525	9.57904	9.77031	9.67897	9.68442	10.0062	9.88317	9.93297	9.63938	9.73728	9.69876	9.6831	9.55902	9.98622	9.71763
ANKRD50	5.12073	5.54676	5.64498	5.545	5.55046	6.09291	5.49586	5.6979	5.94918	5.6258	5.33973	5.31622	6.10523	5.61423	5.52135	5.61605	5.34821	6.09961	5.62517	5.46824	5.97051	6.12794	5.08404	5.94905	6.58797	6.35572	5.67231	5.4314	5.27345	6.48307	5.41346	4.97134	6.93987	5.47053	6.52556	6.11133	5.64421	5.68039	5.44494	5.42347	5.44391	5.75707	5.07417	6.12067	5.61667	5.54195	4.87663	4.38279	5.53003
ANKRD52	6.37068	6.27422	6.23064	5.8282	5.37542	6.17198	5.7164	5.99906	5.81851	6.12424	6.17736	5.76528	6.11379	5.98303	5.81145	6.22885	6.22202	6.04141	5.86902	6.17936	6.26543	6.07323	6.36685	6.13504	5.88564	5.95306	5.59051	5.70108	5.85115	6.10634	6.21089	5.54748	6.44833	5.85712	6.3161	5.82616	5.8793	5.46852	5.75707	6.02164	6.42536	6.23577	5.91991	5.90523	4.99848	5.7943	5.71234	6.36776	6.18918
ANKRD53	4.06975	4.07102	4.14918	4.56436	4.41363	4.0266	4.10061	4.45536	4.54257	4.06349	4.24461	4.48494	4.0256	4.34877	4.23203	4.43753	4.13785	4.29999	4.35741	4.14738	4.27204	4.19329	4.05133	3.942	4.0125	4.02987	4.59144	4.3018	4.48682	3.89248	4.1385	4.79936	3.91872	4.65864	4.04047	4.48307	4.42905	4.23259	4.12762	3.96107	4.25914	4.47056	4.5606	4.25258	4.25631	4.02745	4.72615	4.54497	4.37667
ANKRD54	6.32432	6.02884	5.97299	5.95711	5.75387	6.29377	5.82683	6.11466	5.8014	5.93119	6.31046	5.69262	6.5339	6.00522	6.07893	6.10726	6.19093	5.94184	5.68907	6.12009	5.86444	5.69196	6.15092	6.30415	6.02222	6.10809	5.78895	5.83378	6.01093	6.4432	5.74153	5.7076	6.52013	5.8534	6.41308	6.10675	5.91926	5.96114	5.45495	5.72921	6.14329	6.13741	5.82127	5.9301	5.48747	5.45193	5.95589	5.9421	6.25785
ANKRD55	7.8447	7.78633	7.57282	9.56035	7.52828	7.90203	5.96559	6.8451	7.23442	6.96536	8.79289	8.01199	7.95276	8.10999	8.4647	7.60191	6.75732	7.24815	7.19705	7.44814	7.1622	7.95474	7.87149	7.2256	8.2055	7.67826	8.67888	8.08311	7.92245	8.25733	6.51852	7.70785	6.43402	7.10784	7.44379	7.45432	8.50103	9.01799	6.75849	6.68231	6.78117	8.848	6.94282	8.43192	7.65269	7.23343	8.43686	7.55669	7.74008
ANKRD6	6.71328	6.8256	6.87528	7.62953	6.60066	6.84676	5.97866	6.45064	6.75216	6.4337	7.37404	6.12284	6.18138	7.00317	7.13692	6.81076	7.00115	6.15794	5.957	6.78568	5.86411	6.90731	6.89612	6.66826	7.28541	7.13896	7.16965	7.49953	6.6819	6.52332	6.50129	5.83286	5.96303	6.37589	6.40123	6.54961	7.63675	7.6836	6.3132	6.58833	6.69915	7.33819	6.19731	7.27252	7.13506	7.28001	6.53069	6.44573	6.84574
ANKRD60	3.46473	3.59667	3.51359	4.01257	3.95068	3.79397	3.91948	3.58214	3.77078	3.61374	4.1632	3.57354	3.81305	3.91948	3.96131	3.41672	4.14028	3.47667	4.14464	3.23396	3.96444	4.00115	3.69849	4.21668	3.60561	3.8928	4.27942	4.29985	4.09517	3.9762	3.79397	4.1757	3.69366	3.70312	4.23789	4.19681	3.85784	4.21187	3.9816	4.06715	3.95765	4.19523	3.69805	3.86429	2.80995	4.07341	4.04182	3.56655	3.90049
ANKRD65	4.49048	4.45301	4.38042	4.49366	4.60529	4.18981	4.39602	4.46237	4.32066	4.44477	4.36269	4.69038	4.4139	4.55197	4.49735	4.41521	4.24453	4.56492	4.85646	4.46403	4.42314	4.28887	4.40207	4.41458	4.36419	4.55826	4.70193	4.35442	4.28271	4.34987	4.49578	4.60302	4.40728	4.60764	4.33744	4.71683	4.64208	4.38399	4.37239	4.44314	4.30987	4.72472	4.72749	4.54981	4.52635	4.41292	4.82653	4.56551	4.61035
ANKRD7	2.69294	2.5887	2.68626	2.40863	2.82829	2.53974	2.4743	2.75966	3.11082	2.89523	3.16039	2.61448	2.74759	2.45823	2.60621	3.15741	2.48279	2.63001	2.92051	2.54775	2.56634	2.63947	2.43313	2.46801	2.5682	2.57169	2.81564	2.5493	2.61755	2.75966	2.73239	2.70498	2.38243	2.55915	2.73765	2.91411	3.09294	2.64719	2.74435	2.99659	2.71992	2.91179	3.45588	2.89537	3.03283	2.71192	3.24931	3.05912	2.55675
ANKRD9	4.24208	3.5291	3.50582	3.85049	3.17724	4.1269	3.42696	3.84829	3.486	3.68095	3.74643	3.63698	7.28379	4.04267	4.2811	3.54885	3.46794	3.49382	3.1639	2.81368	3.82362	3.35437	6.28103	3.86508	4.55854	4.37774	5.22139	3.93963	4.00975	4.68832	3.33202	3.29506	3.74902	3.73925	4.15695	4.206	3.79274	3.42739	3.34494	3.61612	3.46794	3.5596	3.91081	3.71075	3.3265	3.20165	3.31399	3.78621	3.94056
ANKS1A	7.57991	7.59723	7.48351	8.42776	7.64975	7.98097	7.48624	7.59596	7.91021	7.46922	7.62269	7.26485	7.23445	7.94866	7.9688	7.66612	7.75559	7.83922	7.5792	7.62446	8.29753	7.8211	7.77144	7.88286	8.26742	7.85823	8.16776	8.30612	7.65543	8.11226	7.68646	7.25786	8.06696	7.62667	7.8308	7.98431	7.95674	8.11852	7.73122	7.54929	7.59875	8.03222	7.14172	8.16656	8.32575	8.09671	7.68308	7.5182	7.63913
[truncated: 22,525 more rows]
[truncated: 80 more columns]
