# Supplementary material for: Exploration of Potential Integrated Models of N6-Methyladenosine Immunity in Systemic Lupus Erythematosus by Bioinformatic Analyses
Source: Front Immunol. 2022 Feb 7;12:752736. doi: 10.3389/fimmu.2021.752736 (PMC8859446; doi:10.3389/fimmu.2021.752736)
Supplement: Supplementary Table 4 — Datas of the gene expression of GSE110169. [file Table_4.xlsx]

## Sheet: Sheet1
ID	GSM2981057	GSM2981058	GSM2981059	GSM2981060	GSM2981061	GSM2981062	GSM2981063	GSM2981064	GSM2981065	GSM2981066	GSM2981067	GSM2981068	GSM2981069	GSM2981070	GSM2981071	GSM2981072	GSM2981073	GSM2981074	GSM2981075	GSM2981121	GSM2981122	GSM2981123	GSM2981124	GSM2981126	GSM2981133	GSM2981135	GSM2981136	GSM2981140	GSM2981141	GSM2981142	GSM2981143	GSM2981144	GSM2981145	GSM2981147	GSM2981149	GSM2981155	GSM2981161	GSM2981163	GSM2981198	GSM2981199	GSM2981202	GSM2981203	GSM2981204	GSM2981205	GSM2981207	GSM2981208	GSM2981209	GSM2981210	GSM2981211
---	3.50101	3.42849	3.40864	3.61903	3.40532	3.54844	3.40494	3.37147	3.49415	3.442	3.42482	3.37967	3.43171	3.44157	3.46929	3.47448	3.38048	3.47782	3.445	3.95463	3.89006	3.91379	3.89265	3.88832	3.92384	3.94304	3.93977	3.95968	3.91935	3.94762	3.95962	3.94822	3.95987	3.89528	3.93797	3.9019	4.0243	4.01993	3.40288	3.44989	3.42953	3.44843	3.47449	3.47699	3.48087	3.44783	3.47348	3.43788	3.46531
A1BG	2.908	2.796	2.916	2.444	3.057	3.063	2.545	2.688	2.938	2.465	2.9	2.922	3.085	2.589	2.892	2.791	3.041	2.913	2.92	4.101	3.878	3.748	3.665	3.567	3.813	3.661	3.69	3.383	3.79	4.037	3.641	4.1	3.627	3.806	3.715	3.946	3.33	3.531	3.296	3.14	2.96	2.786	3.297	2.849	2.985	3.073	2.919	3.055	3.026
A1CF	2.4785	2.156	2.3735	2.853	2.577	2.2565	2.334	2.403	2.5955	2.3535	2.4295	2.1385	2.3	2.1645	2.2865	2.1115	2.2845	2.267	2.1105	2.82	2.763	2.558	2.8555	2.7665	2.776	2.6645	2.784	2.6445	2.7145	2.7485	2.6515	2.82	2.9105	2.837	2.7185	2.755	2.9095	2.787	2.447	2.2565	2.2465	2.2485	2.3875	2.3395	2.3785	2.488	2.2625	2.3665	2.3225
A2BP1	2.5973	2.2996	2.2855	3.0179	2.3271	2.6713	2.3298	2.2901	2.5857	2.3436	2.2839	2.2267	2.2984	2.4136	2.2844	2.3437	2.2777	2.3356	2.4041	2.9674	2.9484	2.9464	3.0001	3.0024	2.9566	2.9742	3.0236	3.0145	2.9507	3.076	3.0325	3.0012	2.9955	2.9597	3.0144	3.0679	3.1604	3.1419	2.3688	2.3611	2.4026	2.3778	2.4617	2.4401	2.4701	2.378	2.4241	2.4574	2.3981
A2LD1	2.103	2.497	2.579	2.664	2.925	2.094	2.441	2.505	2.653	2.625	2.367	2.536	2.51	2.978	2.891	2.233	2.402	2.141	2.288	3.29	3.667	2.98	3.244	3.091	3.214	3.534	3.832	3.569	3.344	3.203	2.97	3.327	3.372	3.146	3.316	3.088	3.077	3.053	2.867	2.633	2.695	2.641	2.572	2.367	2.799	2.388	2.358	2.681	2.278
A2M	3.698	4.515	3.893	3.64	4.194	3.063	3.795	3.982	3.561	3.703	3.826	3.955	3.563	3.787	4.438	4.42	3.672	3.542	3.955	4.066	4.383	4.784	4.404	4.46	4.23	4.555	4.339	4.513	4.521	4.531	4.401	3.964	5.176	4.195	4.202	4.091	4.508	4.033	2.903	3.798	3.546	3.261	3.387	3.437	3.16	3.976	3.01	3.236	3.436
A2ML1	2.4315	2.371	2.5515	2.513	2.5235	2.2765	2.3675	2.524	2.3255	2.4735	2.4415	2.456	2.4095	2.507	2.2565	2.344	2.2285	2.3335	2.307	2.952	2.9035	2.895	3.0105	3.004	2.773	2.8605	2.906	2.967	2.8325	2.8945	3.0235	2.8915	3.072	2.8485	2.9365	2.7805	2.685	2.9555	2.409	2.4695	2.5105	2.349	2.319	2.479	2.488	2.445	2.6475	2.395	2.449
A3GALT2	2.537	2.802	2.8	2.517	2.498	2.662	2.464	2.501	2.748	2.533	2.868	2.642	2.732	2.679	2.565	2.451	2.486	2.483	2.92	3.112	3.165	3.17	3.325	3.09	3.404	3.349	3.133	3.176	3.338	3.536	3.17	2.965	3.181	3.171	3.277	3.228	3.054	3.275	2.637	2.488	2.505	2.576	2.605	2.418	2.564	2.443	2.601	2.474	2.488
A4GALT	2.908	2.5975	2.62025	2.78975	2.4955	2.70625	2.53875	2.59375	2.56075	2.614	2.45275	2.4405	2.56125	2.41725	2.57675	2.5945	2.44475	2.51025	2.46125	3.26725	2.932	2.9065	3.024	2.99725	3.09675	3.03625	3.14375	3.1035	3.094	3.08225	3.0085	2.99675	3.07975	3.01025	3.23025	2.98425	3.3115	3.10525	2.18575	2.36525	2.218	2.175	2.33475	2.29475	2.29625	2.4165	2.30275	2.24725	2.34575
A4GNT	1.929	1.968	2.012	2.073	2.224	2.368	1.924	1.98	2.164	2.182	2.119	2.125	2.263	2.038	2.127	2.135	2.063	2.033	2.265	2.927	2.556	2.795	2.69	2.671	2.772	2.852	2.727	2.795	2.516	2.669	2.79	2.651	2.821	2.679	2.522	2.823	2.712	2.762	2.278	2.193	2.202	2.372	2.157	2.301	2.321	2.462	2.34	2.619	2.177
AAA1	2.5534	2.3253	2.2388	2.6347	2.2225	2.4338	2.2395	2.3	2.4015	2.2419	2.2185	2.2366	2.3264	2.3094	2.3523	2.2717	2.2475	2.3362	2.2936	2.9142	2.8548	2.8492	2.7236	2.8041	2.7873	2.8526	2.8275	2.9586	2.8526	2.8465	2.7979	2.9265	2.7911	2.7347	2.8376	2.829	2.9463	3.1363	2.471	2.4284	2.3676	2.5041	2.518	2.4477	2.5704	2.4131	2.4762	2.5014	2.5013
AAAS	6.493	6.358	6.58	6.461	6.416	5.861	6.588	6.498	6.64	6.773	6.358	6.33	6.816	6.083	6.788	6.336	6.732	6.247	6.601	6.116	6.168	6.08	6.062	6.497	6.028	6.504	6.235	6.059	6.596	6.132	6.153	5.741	6.028	6.151	6.413	6.159	6.211	6.221	5.725	5.652	5.561	6.11	5.481	5.816	5.932	6.038	5.895	5.577	5.344
AACS	2.83375	2.9185	2.99625	2.80125	3.0495	3.19125	3.29075	3.0315	3.15725	3.05975	3.1825	3.15525	3.064	2.83475	3.2065	3.02975	3.01375	2.938	2.88325	3.6565	3.58225	3.51675	3.65975	3.6495	3.7275	3.6565	3.68625	3.73175	3.73375	3.584	3.66975	3.6395	3.591	3.63925	3.60525	3.699	3.80575	3.68725	3.29	3.2135	2.86325	3.1185	3.19775	3.13	3.2335	3.18925	2.98575	3.0335	3.06025
AACSL	2.484	2.791	3.042	2.45	2.511	2.901	2.52	2.699	2.931	2.673	2.603	2.404	2.456	2.713	2.583	2.847	2.579	2.669	2.412	3.198	3.246	3.432	3.293	3.03	3.468	3.137	3.208	3.208	3.148	3.289	3.161	3.254	3.397	3.195	3.208	2.964	3.254	3.172	2.528	2.294	2.367	2.54	2.572	2.448	2.484	2.527	2.698	2.451	2.497
AADAC	1.694	1.836	1.995	2.065	1.806	2.187	2.033	1.879	1.905	1.731	1.927	1.858	1.827	1.82	1.837	1.957	1.863	1.947	1.859	2.49	2.477	2.672	2.493	2.539	2.397	2.469	2.553	2.589	2.654	2.567	2.473	2.55	2.564	2.466	2.542	2.447	2.477	2.575	2.39	2.125	1.966	2.088	1.89	2.082	1.925	2.06	2.094	2.164	2.298
AADACL2	2.1	2.001	2.064	1.975	2.114	2.328	1.826	2.035	1.942	1.937	1.999	2.251	1.987	1.959	1.903	2.089	1.916	1.965	2.113	2.718	3.026	2.993	2.994	3.059	2.996	2.929	2.993	3.08	2.981	3.029	3.135	3.22	2.939	2.969	2.904	2.962	3.085	2.898	2.389	2.415	2.395	2.267	2.373	2.236	2.267	2.291	2.252	2.5	2.678
AADACL3	2.678	2.246	2.201	2.254	2.239	2.412	2.276	2.321	2.476	2.125	2.107	2.116	2.624	2.086	2.371	2.238	2.251	2.31	2.302	3.104	2.839	3.143	2.975	3.085	3.081	2.937	2.986	3.117	3.05	3.001	2.748	3.025	3.246	3.09	3.107	2.958	3.081	2.956	2.614	2.576	2.292	2.301	2.383	2.32	2.462	2.545	2.134	2.456	2.375
AADACL4	1.901	2.044	2.276	1.963	1.817	2.096	1.962	1.977	2.022	1.785	2.07	1.895	2.001	2.035	2.117	1.864	1.941	1.934	2.076	2.795	2.828	2.781	2.795	2.719	3.096	2.765	2.739	2.918	2.634	2.728	2.819	2.718	2.818	2.687	2.893	2.738	2.786	2.803	2.358	2.233	2.293	2.185	2.154	2.324	2.132	2.467	2.224	2.268	2.511
AADAT	2.071	2.082	1.914	2.642	2.134	2.322	2.135	2.03	1.932	2.022	2.196	2.116	1.88	2.161	2.015	2.248	1.915	2.158	2.102	2.683	2.628	2.777	2.56	2.655	2.56	2.641	2.658	2.789	2.563	2.465	2.601	2.865	2.693	2.672	2.584	2.734	2.679	2.664	2.737	2.219	2.146	2.31	2.545	2.114	2.821	2.061	2.253	2.441	2.78
AAGAB	6.469	6.507	6.59567	6.51767	6.674	6.43767	6.49767	6.547	6.38567	6.645	6.56367	6.50333	6.46933	6.23067	6.74533	6.39933	6.52333	6.34967	6.50267	6.267	6.43333	6.62567	6.64033	6.689	6.473	6.71967	6.561	6.568	6.68533	6.49733	6.77133	6.33767	6.74533	6.32567	6.665	6.41933	6.40467	6.30133	5.53867	6.176	6.39967	6.34367	5.99767	6.394	5.68467	6.35	6.23333	5.93533	5.90533
AAK1	5.021	5.09967	4.782	5.11	5.06233	4.923	5.0515	4.693	4.9755	5.20167	5.02983	5.11517	5.052	4.96433	5.166	5.3515	4.96917	4.89333	4.8885	4.89383	5.22117	4.87983	5.10033	5.189	5.17333	5.526	5.25033	5.25167	5.47067	5.00583	5.2045	4.9395	5.56217	5.33917	5.1815	5.24417	5.18717	4.86867	4.12367	4.61333	4.64717	4.95517	4.499	4.66733	4.75717	4.8085	4.836	4.47133	4.42683
AAMP	5.6825	5.572	5.5915	5.7035	5.4005	5.2475	5.4535	5.501	5.5975	5.632	5.376	5.468	5.8475	5.3365	5.4945	5.3	5.4955	5.29	5.623	6.5065	6.38	6.2135	6.5005	6.5545	6.3465	6.497	6.6285	6.183	6.6065	6.409	6.508	6.208	6.3995	6.23	6.4145	6.262	6.213	6.265	4.567	4.5405	4.3705	4.8345	4.2585	4.664	4.5165	4.9205	4.1205	4.1475	4.065
AANAT	2.392	2.336	2.411	2.727	2.358	2.345	2.255	2.348	2.229	2.372	2.537	2.208	2.498	2.256	1.914	2.333	2.213	2.247	2.688	3.257	3.125	3.344	3.129	3.196	2.963	3.112	3.305	3.052	3.243	3.172	3.183	2.902	3.357	3.246	3.373	3.269	3.261	3.11	2.438	2.697	2.42	2.304	2.494	2.67	2.531	2.527	2.789	2.542	2.14
AARS	5.655	5.2635	5.483	5.6635	5.251	4.6875	4.963	5.4355	5.645	5.7525	5.2995	5.5565	5.442	5.0135	5.573	4.7565	5.6545	4.982	5.3595	5.662	5.7915	5.6485	5.7105	6.134	5.3205	5.6715	5.8225	5.5155	5.8675	5.217	5.853	5.2025	5.421	5.5715	5.902	5.5585	5.603	5.4685	4.104	4.378	4.1515	4.468	4.225	4.3665	4.5955	4.683	4.496	4.073	3.621
AARS2	5.4445	5.2635	6.0305	5.4305	5.7095	5.023	5.64	5.6985	6.0885	5.5355	5.2585	5.715	5.669	5.398	5.363	5.283	5.9385	4.9975	5.4255	6.712	6.6645	6.6005	6.5975	6.919	6.122	7.164	6.6	6.748	6.724	6.1605	6.844	6.155	7.1	6.264	6.896	6.825	6.5565	6.503	4.9335	5.501	5.674	5.875	5.4005	5.6435	5.887	5.6775	5.555	5.796	5.1565
AARSD1	2.742	2.86933	3.165	3.167	2.91633	3.02667	2.882	3.07567	3.059	3.11633	2.98967	3.02833	3.054	3.16267	3.20867	2.83333	3.17767	2.86733	3.00467	3.53533	3.678	3.71467	3.71233	3.89	3.627	3.77267	3.729	3.62367	3.52467	3.59533	3.51667	3.732	3.79067	3.795	3.775	3.605	3.64233	3.46433	2.94267	2.94333	2.98533	3.15667	3.064	3.15133	3.08333	3.139	3.02467	3.17967	3.105
AASDH	5.28733	5.137	5.718	5.18733	5.54467	4.29333	5.48967	5.59933	5.35333	5.58467	5.47567	5.48733	5.38467	5.37	5.508	5.48167	5.92533	5.54367	5.31133	5.714	5.702	6.202	5.63067	5.845	5.96767	6.05567	5.81133	5.847	5.77067	5.74167	5.54033	6.057	6.05133	5.83633	5.92667	5.73367	5.45167	5.692	5.642	5.49967	5.53767	5.78967	5.63733	5.312	5.65267	5.23867	5.44133	5.557	5.51667
AASDHPPT	6.857	7.018	7.10533	6.311	6.992	6.207	7.22367	7.217	6.441	6.62467	6.93267	7.40033	6.43767	7.17	6.82167	6.82567	7.27933	7.077	6.88633	7.97367	8.01567	7.776	7.748	7.85667	7.66867	7.64033	7.83	8.073	7.54667	7.665	7.642	7.897	7.83567	7.896	7.75867	7.86833	7.79567	7.56067	7.577	7.17367	7.49867	7.58733	7.358	7.24233	7.467	6.858	7.42667	7.882	7.65433
AASS	3.47675	3.40075	3.2255	3.70375	3.254	3.691	3.1595	3.51625	3.22025	3.1145	3.3975	3.687	3.03075	3.02225	3.14975	3.39725	3.73425	3.0895	3.26775	3.8	3.36925	3.351	3.51825	3.841	3.5255	3.46975	3.72675	3.79825	3.8585	3.383	3.49775	3.888	4.41475	4.37725	3.5395	3.68875	3.50375	3.87975	3.62975	3.286	3.25575	3.589	3.077	3.432	3.142	2.9805	3.669	3.64975	3.494
AATF	6.685	6.744	6.621	6.717	6.777	6.319	6.419	6.411	7.266	6.838	6.715	6.536	7.078	6.215	6.93	6.608	6.551	6.67	6.889	6.858	6.946	6.629	7.399	6.864	6.961	7.005	6.91	6.723	7.546	7.347	7.122	6.751	6.675	6.616	6.982	6.762	7.21	6.734	5.657	6.251	5.568	6.085	5.222	6.04	4.974	6.449	4.639	4.602	5.019
AATK	5.578	6.155	5.547	5.456	6.054	5.332	5.636	4.93	6.305	4.76	6.209	5.952	6.096	5.954	5.88	5.752	4.581	5.937	5.596	5.699	5.992	5.313	6.186	5.288	6.105	5.733	5.618	5.353	6.09	6.178	5.979	5.849	5.285	5.692	5.174	6.424	6.18	5.599	4.911	5.488	5.078	5.251	5.303	5.068	4.687	5.374	4.898	5.056	5.465
ABAT	5.084	5.678	5.5045	5.042	5.9045	5.6215	5.4015	5.8005	5.8745	5.1455	6.395	5.245	4.903	5.6075	5.7055	5.667	4.771	4.9745	5.682	6.2145	5.7835	5.5915	7.0355	5.663	6.2665	6.4115	5.7005	5.6505	5.8205	6.114	6.2765	5.753	6.2295	6.0315	5.442	6.383	6.3525	5.6165	4.428	5.406	5.704	5.1	4.5655	5.179	5.323	5.1145	4.2015	4.6305	4.985
ABCA1	4.384	5.48867	4.22733	4.52633	5.655	5.268	4.745	4.92533	4.72567	4.44133	5.053	4.98233	4.83367	5.16	4.54333	5.499	4.29033	5.205	4.61733	4.892	6.10367	5.12467	6.08733	4.942	5.804	5.437	5.57	5.434	5.19967	5.849	6.126	5.06467	6.265	5.67633	5.60233	6.06633	5.943	5.92233	4.85033	4.98233	4.49433	5.42867	4.75067	4.31267	4.906	4.864	4.90333	5.25233	5.38433
ABCA10	2.54	2.218	2.6595	2.6955	2.84575	2.71225	2.64975	2.68125	2.51275	2.551	2.563	2.911	2.5185	2.50125	2.5565	2.64475	2.73575	2.76575	2.2555	3.47725	3.64425	3.40225	3.40475	3.608	3.2985	3.239	3.3185	3.6715	3.33675	3.36275	3.23075	3.715	3.7695	3.622	3.30325	3.63625	3.39325	3.279	3.56175	2.68775	2.86275	2.73025	3.266	2.86275	2.9205	2.837	3.29675	3.4195	3.446
ABCA11P	2.735	2.536	2.776	3.301	2.829	3.115	2.498	2.708	2.893	2.67	2.491	2.83	2.766	2.843	2.668	2.604	2.815	2.925	2.463	3.338	3.084	2.731	2.546	3.038	2.944	3.22	3.148	3.111	2.707	2.926	3.082	3.134	3.551	3.3	2.983	3.114	3.536	2.995	2.555	2.787	2.859	3.043	2.961	2.584	2.6	2.721	2.889	3.03	2.825
ABCA11P /// ZNF721	2.577	2.05	2.012	3.86	2.005	2.603	2.089	1.826	2.698	1.975	1.962	1.755	1.954	2.379	1.988	2.169	2.04	2	2.142	3.146	2.779	3.095	3.034	2.563	2.736	3.104	2.803	3.08	2.76	2.754	2.997	2.874	3.414	3.19	2.957	2.912	4.061	3.62	2.51	2.964	2.355	2.302	2.705	2.563	2.287	2.204	2.097	2.394	3.123
ABCA12	2.3765	2.2015	2.3985	2.491	2.1905	2.4255	2.377	2.32	2.4155	2.2525	2.088	2.0945	2.322	2.3455	2.1865	2.3335	2.115	2.5625	2.269	2.727	2.759	2.8265	2.777	2.71	2.703	2.9125	2.79	2.887	2.6535	2.7175	2.7465	2.779	2.9365	2.715	2.7745	2.7225	2.873	2.891	2.268	2.3215	2.32	2.195	2.2235	2.3395	2.2525	2.3165	2.385	2.288	2.218
ABCA13	2.369	2.15	2.735	1.79	2.231	2.68	2.405	2.809	1.828	2.491	2.647	2.317	2.339	2.052	1.852	2.18	2.455	2.31	1.803	2.871	3.099	3.131	3.706	2.944	3.231	3.253	3.212	3.388	2.829	2.987	2.662	3.492	2.748	3.141	3.421	2.775	3.869	3.292	3.132	3.018	4.486	3.047	2.874	2.645	2.622	3.583	3.686	3.124	4.098
ABCA2	3.282	3.1905	3.423	3.5495	3.747	3.3105	3.51	3.474	3.169	3.32	3.492	3.382	3.344	3.34	3.3965	3.2745	3.132	3.0525	3.2345	3.6335	3.5465	3.5575	3.4755	3.511	3.7365	3.2385	3.803	3.5185	3.7485	3.6025	3.508	3.597	3.725	3.624	3.8885	3.73	3.728	3.439	2.4225	2.5435	2.713	2.4885	2.7595	2.696	2.8075	2.6375	2.68	2.5075	2.4815
ABCA3	3.40167	3.04467	3.01767	3.23567	3.16267	3.23167	3.09067	3.21767	3.34433	3.20933	3.12933	3.048	3.39233	2.826	3.336	3.14533	3.01833	3.098	3.15033	3.71267	3.58433	3.69033	3.551	3.55367	3.384	3.68167	3.76933	3.57033	3.64333	3.56233	3.49433	3.49	3.683	3.38667	3.61867	3.47867	3.302	3.622	2.63567	2.78767	2.626	2.75333	2.54	2.53767	2.97867	2.92133	2.77767	2.47767	2.70467
ABCA4	2.6845	2.4945	2.511	2.693	2.491	2.514	2.3505	2.5625	2.5815	2.6245	2.493	2.547	2.4415	2.576	2.544	2.518	2.384	2.506	2.8015	3.1945	3.13	2.9875	2.8165	2.9575	2.892	2.9115	3.0285	3.0185	3.0095	3.0755	3.001	2.95	2.952	3.0185	3.231	3.1405	2.9535	2.9455	2.3015	2.308	2.381	2.369	2.2565	2.5035	2.4275	2.311	2.3305	2.4205	2.338
ABCA5	4.89633	5.16233	4.77733	5.27767	5.233	5.594	4.99033	5.35967	5.23667	4.726	4.873	5.36	4.58167	5.266	4.80033	4.82733	5.354	5.19533	5.67833	5.73467	5.63	5.765	5.12867	5.29833	5.22867	5.38867	5.536	5.612	5.09067	5.42467	5.28533	5.98	6.053	5.69533	5.37733	5.518	5.25833	5.83833	5.73833	5.08733	5.78	5.438	5.66767	5.19167	5.37133	4.74667	5.47033	6.63433	6.143
ABCA6	2.59933	2.71567	2.811	2.77	2.77167	3.17833	2.646	2.77633	2.65033	2.784	2.639	2.63	2.57133	2.647	2.62867	2.56933	2.84733	2.46433	2.622	3.28467	3.17667	3.39733	3.187	3.37867	3.211	3.23933	3.22267	3.41433	3.502	3.25133	3.38433	3.36367	3.53967	3.34733	3.55033	3.08567	3.493	3.355	2.50867	2.48767	2.79333	2.49233	2.53567	2.62467	2.60233	2.56967	2.62	2.576	2.48933
ABCA7	4.4365	4.3955	4.583	4.881	4.254	4.8405	4.7165	4.482	5.0395	4.469	4.4785	4.5145	4.766	4.4555	4.6955	4.518	4.604	4.574	4.8895	4.827	4.86	4.469	4.757	4.6455	5.028	5.0405	4.857	4.497	4.7415	4.859	4.9805	4.6875	4.4645	4.59	4.751	5.1125	4.9875	5.071	4.073	4.4105	4.3375	3.8745	4.329	3.822	4.0755	4.487	4.245	3.924	4.163
ABCA8	2.4708	2.4056	2.3404	2.5602	2.2976	2.6118	2.2378	2.3544	2.2762	2.2818	2.3182	2.2666	2.3362	2.2954	2.2618	2.3876	2.279	2.5206	2.5108	2.9522	2.9674	2.8092	2.974	3.056	2.9622	2.8958	2.9792	3.0018	2.9244	2.8754	2.8826	3.082	3.0038	3.0094	2.9304	2.8604	3.0524	3.0336	2.6538	2.4792	2.5854	2.4696	2.5072	2.4242	2.4764	2.4518	2.574	2.6012	2.669
ABCA9	2.2145	2.33	2.36825	2.468	2.20075	2.3085	2.212	2.42425	2.42925	2.307	2.42125	2.32425	2.12675	2.37775	2.388	2.3345	2.435	2.49475	2.40125	2.983	2.95	2.7795	3.00325	2.999	2.98575	2.9735	3.01275	3.01725	2.86325	2.9025	2.91125	3.09875	3.05875	2.975	2.9085	2.8545	3.01825	3.1775	2.6005	2.53775	2.59625	2.545	2.45175	2.582	2.39725	2.44725	2.5185	2.62625	2.50325
ABCB1	3.67275	3.668	3.6015	4.047	3.61275	3.50275	3.8265	3.606	3.41675	3.94375	3.9085	3.7615	3.14775	3.727	4.0445	3.33775	3.68325	3.08625	3.423	3.776	3.9645	4.25825	3.75025	4.0255	3.57875	4.21125	3.955	4.262	3.8685	3.6305	3.571	3.837	4.33125	3.975	3.865	3.93475	3.80475	3.68475	4.03625	3.539	3.60275	3.81575	3.98275	3.39675	3.6925	3.24375	3.47675	3.6515	3.58625
ABCB10	7.206	7.373	7.852	6.378	7.697	8.131	7.801	8.238	6.208	7.593	7.459	7.846	6.865	8.065	6.836	7.706	8.062	7.744	7.844	8.766	8.657	9.355	8.338	8.659	8.102	8.404	8.262	8.783	7.821	8.052	8.155	9.227	8.576	8.958	8.394	8.237	8.082	8.616	8.973	7.901	8.66	8.234	8.551	8.011	8.576	7.091	8.539	9.167	8.847
ABCB11	2.41	2.331	2.288	2.183	2.075	2.148	2.049	1.989	2.229	2.16	2.271	2.256	2.173	2.068	2.438	2.157	2.168	2.283	2.267	2.755	2.799	2.832	3.093	2.679	3.001	2.728	2.685	2.639	2.695	2.714	2.95	2.705	2.901	2.893	2.832	2.685	2.891	2.857	2.232	2.269	2.307	2.473	2.354	2.277	2.264	2.253	2.491	2.364	2.528
ABCB4	2.971	3.1235	4.073	3.626	2.775	4.282	3.6745	4.975	3.023	4.396	3.76	4.405	4.0775	3.3115	3.5675	4.137	4.562	3.738	3.8105	3.9315	5.0955	4.038	3.9425	5.3485	5.139	4.5235	5.134	4.781	4.034	3.7845	4.961	4.7085	4.441	5.922	5.206	4.427	5.738	5.0745	3.0265	3.745	4.066	3.909	3.71	4.93	3.187	3.71	4.3285	3.838	3.6755
ABCB5	2.08375	2.13275	2.149	2.4185	2.09425	2.18225	2.1055	2.07425	2.281	2.1255	2.0975	2.087	2.0795	2.13825	2.08875	2.089	2.115	2.05675	2.1245	2.7655	2.72325	2.7245	2.7475	2.77525	2.74525	2.7045	2.8295	2.7665	2.73725	2.7235	2.691	2.80825	2.73925	2.643	2.869	2.69975	2.83775	2.8715	2.24225	2.2595	2.4255	2.119	2.18575	2.43975	2.3845	2.3435	2.31375	2.446	2.332
ABCB6 /// ATG9A	3.514	3.348	3.6705	3.6245	3.295	3.212	3.3735	3.5045	3.7975	3.6605	3.5285	3.325	3.605	3.521	3.226	3.2	3.2405	3.2295	3.6025	3.737	3.7675	3.982	3.7225	3.706	3.8005	3.889	3.787	3.784	3.8175	3.948	3.9965	3.982	3.6225	3.795	3.959	3.8395	3.7865	3.7815	2.822	2.9465	2.762	2.969	2.877	2.8695	2.9125	3.0645	3.178	2.997	2.891
ABCB7	7.044	6.96	7.067	6.711	7.006	6.59	6.595	7.238	6.71	7.084	6.931	6.986	6.803	6.787	7.083	6.808	7.383	6.648	6.83	7.588	7.388	7.445	7.091	7.534	6.81	7.33	7.374	7.473	7.39	6.81	7.225	7.604	7.417	7.892	7.623	7.275	7.289	7.496	7.516	6.99	7.209	6.979	7.233	7.249	7.074	6.645	6.992	7.361	7.045
ABCB8	3.615	3.57925	3.937	3.81175	3.67275	3.40975	3.5715	3.6475	3.834	3.74175	3.65125	3.7285	3.6025	3.606	3.58775	3.60825	3.8925	3.45025	3.42525	3.95	4.04925	3.9125	4.12	4.1215	3.99325	3.927	3.917	4.00525	4.19825	4.04675	4.10875	4.01025	3.885	3.913	4.27525	4.0785	3.988	4.1125	3.202	3.139	3.1275	2.9895	3.20925	3.22375	3.09675	3.1035	3.2925	3.153	2.99575
ABCB9	3.012	2.732	2.91487	2.95438	2.694	2.78	2.665	2.69925	2.76613	2.79312	2.91188	2.71113	2.79738	2.5945	2.57025	2.75537	2.70012	2.7455	2.62962	3.17512	3.08988	3.14337	3.08438	3.34262	3.107	3.12525	3.223	3.20363	3.17025	3.29275	3.1755	3.12438	3.16113	3.09287	3.184	3.1485	3.20412	3.27862	2.36037	2.58162	2.46025	2.54025	2.47125	2.49587	2.55625	2.6435	2.483	2.4135	2.452
ABCC1	7.84333	7.88033	7.91467	7.954	7.83567	8.131	7.996	8.053	7.602	7.89067	7.80433	7.98567	8.04267	8.154	7.72667	7.79867	7.86	7.59433	8.012	8.20967	8.286	8.11433	8.106	8.17067	8.09833	8.23433	8.209	8.53733	8.33767	8.014	8.53467	8.075	8.30867	8.36967	8.364	8.20433	8.00967	8.242	7.00267	7.12533	7.39633	7.34233	7.20867	7.53267	7.72333	7.789	7.36067	7.43433	7.46333
ABCC10	5.408	5.254	5.782	5.514	5.676	5.684	5.777	5.562	5.88	5.587	5.369	5.394	5.645	5.151	5.726	5.45	5.716	5.466	5.473	6.814	6.668	6.49	6.358	6.81	5.95	6.47	6.22	6.223	6.886	6.618	6.615	6.353	6.846	6.514	6.664	6.371	6.116	6.195	5.819	5.47	5.868	5.566	5.532	5.736	6.052	5.53	5.793	5.685	5.422
ABCC11	2.9345	2.58	2.5605	2.62	2.5155	2.731	2.586	2.815	2.673	2.476	2.7235	2.4795	2.789	2.676	2.6315	2.6615	2.3925	2.5525	2.727	3.12	3.1655	3.1725	3.0925	3.0205	3.102	3.1945	3.1525	3.161	3.0785	3.052	3.021	3.1955	3.0325	3.0325	3.0315	3.0215	3.1345	3.083	2.491	2.7605	2.515	2.657	2.699	2.5455	2.7385	2.745	2.5315	2.488	2.5335
ABCC12	2.3555	2.214	2.2765	2.365	2.107	2.231	1.994	2.1615	2.1815	2.007	2.1495	2.0625	2.24	2.118	2.1245	2.068	2.098	2.14	2.2475	2.68	2.768	2.6455	2.8045	2.783	2.799	2.822	2.7175	2.8305	2.629	2.6795	2.7565	2.8645	2.7375	2.72	2.662	2.642	2.77	2.7905	2.5445	2.5365	2.4485	2.4545	2.3735	2.2155	2.484	2.369	2.252	2.573	2.418
ABCC13	3.335	3.411	4.074	3.599	3.46525	4.4565	3.64625	2.8625	3.8055	4.971	3.94875	2.6125	3.4455	3.92575	4.30125	4.0375	3.114	4.10275	3.4025	5.0745	3.53375	4.9225	3.4715	4.507	4.18825	4.55975	4.097	4.79825	3.9705	4.47525	4.17525	5.26375	3.59775	4.19825	3.86825	3.4155	3.418	3.59725	3.3025	4.26575	3.8925	3.76025	4.1095	3.99125	3.289	3.41925	4.83775	4.06175	4.28475
ABCC2	4.6415	4.737	4.6	3.6005	4.889	4.938	4.6065	4.731	5.0345	4.883	5.203	4.8385	4.6895	4.852	4.614	4.869	4.925	4.6825	4.492	5.1085	4.894	4.9995	5.214	4.9875	5.108	4.7495	4.999	4.9375	4.7925	5.032	4.5935	5.021	4.928	5.139	5.0555	4.895	5.4945	4.96	5.243	4.9585	5.4215	4.6895	5.486	4.95	4.971	4.021	4.822	5.284	5.116
ABCC3	3.324	3.497	3.952	3.915	3.89	2.9255	3.5385	3.6235	3.2255	4.2155	3.343	3.807	3.7415	3.619	4.3605	3.526	4.0285	3.9185	4.0245	3.616	4.0125	3.844	4.1295	3.854	4.0885	3.731	3.498	3.9	3.7655	3.9415	3.633	3.6705	3.7545	3.941	4.123	2.985	3.214	3.1795	2.3385	2.807	2.9265	2.904	2.895	3.038	2.885	3.6845	2.749	2.2785	2.5375
ABCC4	4.4375	4.11425	4.563	4.42575	4.31725	5.035	4.7235	4.276	4.1675	5.5355	4.43	4.5405	4.5625	4.6245	5.1675	4.54375	4.573	5.07275	4.40225	5.31675	4.55425	6.16125	4.62075	4.8065	4.94775	4.5645	4.587	4.89625	4.787	5.11125	4.158	4.96825	4.692	4.637	4.53575	4.42075	4.6505	4.3045	4.123	4.64925	4.48325	5.159	3.95225	4.05275	4.6355	4.298	4.33725	4.356	4.2775
ABCC5	5.87475	5.6825	5.72025	5.655	5.90425	5.90875	5.84	5.5655	5.63525	5.52525	5.83375	5.65575	5.51025	5.804	5.92575	5.5085	5.53775	5.5895	5.71025	6.2635	6.3545	6.02625	6.197	6.2755	6.3565	6.42475	6.3235	6.1505	6.2185	6.22	6.3015	6.45375	6.37775	6.25775	6.34225	6.57525	6.60525	6.4985	5.2035	6.04875	5.805	5.8065	5.8225	5.69825	5.68025	6.218	5.378	6.026	6.09325
ABCC6 /// ABCC6P1 /// LOC100292715	2.571	2.144	2.25	2.724	2.072	2.199	2.183	2.608	2.443	2.654	2.225	2.394	2.385	2.069	2.186	2.354	2.213	2.329	2.493	2.95	3.101	2.766	2.697	2.941	2.822	2.81	3.075	3.053	2.894	2.846	2.934	2.916	2.843	3.119	3.152	2.805	3.287	3.089	2.726	2.586	2.748	2.98	2.618	2.672	2.673	2.644	2.729	2.638	2.646
ABCC6 /// ABCC6P2	2.128	2.817	2.362	2.32	3	2.195	2.306	2.468	2.664	2.375	2.612	2.118	2.581	2.224	1.955	2.357	2.591	2.273	2.406	3.321	3.232	3.574	3.958	3.09	3.876	3.322	3.105	3.212	3.223	3.172	3.276	3.256	3.305	3.371	3.619	3.342	3.733	3.018	2.746	2.657	2.711	2.82	2.786	3.256	2.927	3.134	2.367	2.559	2.83
ABCC6 /// LOC100292715	2.4055	2.831	2.724	2.655	2.742	2.6155	2.4765	2.5955	2.724	2.5365	2.794	2.682	2.652	2.66	2.5	2.571	2.779	2.3665	2.8415	3.4205	3.5425	3.5045	3.5125	3.1855	3.3995	3.493	3.3305	3.4835	3.3825	3.7485	3.644	3.7055	3.208	3.4365	3.414	3.562	3.828	3.2965	2.6495	2.964	2.791	2.567	2.926	2.871	2.9225	3.1215	2.5365	2.7955	2.7055
ABCC6P1	3.091	2.658	2.86	3.945	2.579	3.251	2.549	2.741	2.584	2.728	2.662	2.696	2.532	2.37	2.651	2.745	2.419	2.303	2.786	2.884	2.812	2.788	2.681	2.888	2.905	2.782	2.85	3.179	3.014	2.995	3.005	3.005	3.186	2.992	2.888	2.8	3.1	3.195	2.303	2.376	2.56	2.524	2.483	2.44	2.548	2.311	2.545	2.925	2.183
ABCC8	2.77733	2.66	2.708	2.86567	2.6	2.79167	2.53767	2.679	2.865	2.72233	2.74333	2.68667	2.71733	2.76233	2.658	2.47933	2.40767	2.44467	2.84733	3.02833	3.05633	3.10733	3.09533	3.12767	2.96567	3.07467	3.05933	3.00867	3.079	3.153	3.16633	3.09867	3.121	3.05367	3.11567	3.09767	3.09267	2.97867	2.39967	2.41	2.38667	2.519	2.45667	2.48533	2.36933	2.51567	2.66	2.39533	2.51
ABCC9	2.479	2.19633	2.19667	2.93267	2.15067	2.39333	2.12367	2.26533	2.395	2.16833	2.06333	2.19267	2.01567	2.137	2.02467	2.19767	2.18633	2.36267	2.219	2.871	2.82367	2.86633	2.84833	2.894	2.754	2.77667	2.79167	2.85567	2.86	2.65967	2.81133	3.091	2.88167	2.90567	2.77967	2.66667	2.95533	3.23867	2.472	2.326	2.498	2.71933	2.38133	2.40867	2.431	2.14667	2.31967	2.494	2.632
ABCD1	3.767	4.872	4.449	4.508	4.522	4.516	4.667	4.378	4.455	4.585	4.535	4.414	4.596	4.388	4.098	4.077	4.55	4.179	4.307	5.666	5.386	5.311	5.326	5.206	5.509	5.386	5.296	5.233	6.087	5.695	5.731	5.036	5.533	5.429	5.721	5.569	4.91	5.497	3.187	3.631	2.914	3.495	2.906	3.372	3.09	4.226	3.134	3.07	2.849
ABCD2	3.809	3.0535	3.5925	3.2065	3.193	3.086	4.139	3.9535	3.138	3.1165	3.6095	4.015	3.3825	3.6885	3.676	3.4865	4.0365	3.9055	3.4825	4.2715	4.576	4.4315	4.485	4.202	3.8795	4.4815	4.427	4.6325	4.3835	4.0955	4.1085	4.5505	4.6265	4.387	4.2555	4.557	4.138	4.436	4.8835	3.685	4.4435	4.2935	3.9595	3.968	5.1605	3.369	4.757	4.903	4.978
ABCD3	4.0686	3.8198	3.9592	3.6618	3.9942	4.9068	3.9942	3.9816	3.806	3.8626	3.9492	3.8486	3.7316	3.8862	3.7562	3.8794	3.9074	3.9094	3.8016	4.3542	4.3082	4.4386	4.3596	4.454	4.3644	4.4626	4.292	4.526	4.2726	4.3112	4.2184	4.4922	4.552	4.4922	4.566	4.4196	4.3038	4.4612	4.4644	3.8098	4.0182	4.2144	4.1	3.8998	4.3322	3.7244	4.0916	4.3826	4.4296
ABCD4	4.71867	4.85933	4.928	4.92467	4.94267	5.04833	4.86433	5.00633	5.05833	4.60933	4.62133	4.89367	4.689	4.75967	4.76433	4.46067	4.86733	4.72933	4.793	5.473	5.46333	5.469	5.076	5.27367	5.05	5.16767	5.12967	5.339	5.22167	5.11233	5.372	5.30467	5.37333	5.504	5.43933	5.275	5.09267	5.31867	4.42967	4.38733	4.375	4.33633	4.15467	4.21733	4.24167	4.15867	4.374	4.496	4.52567
ABCE1	6.6688	6.4344	6.8296	6.2774	6.5316	6.5694	6.7802	7.1692	6.2474	6.5494	6.4684	7.2016	6.3028	6.8186	6.7386	6.5834	7.3006	6.5404	6.6328	7.1036	7.5742	7.6754	6.976	7.5868	6.8136	7.2394	7.3512	7.6474	6.8946	6.817	7.1314	7.538	7.3608	7.642	7.3974	7.278	7.019	7.4154	8.258	6.643	7.3338	7.2404	7.4212	7.0374	7.3274	6.384	7.4604	7.9308	7.711
ABCF1	7.358	7.1495	7.3235	7.481	7.006	7.6195	7.0895	7.0865	7.4515	7.67	6.925	7.248	7.168	6.818	7.4785	6.9745	7.246	6.9385	7.183	7.587	7.5535	7.4265	7.7495	7.809	7.034	8.1075	7.5055	7.539	7.7445	7.5285	7.4195	7.315	7.659	7.5355	7.661	7.573	7.547	6.9805	7.34	6.9375	6.643	7.0265	6.717	7.0405	6.952	7.447	6.937	6.554	6.506
ABCF2	4.827	4.34675	4.966	4.903	4.6205	3.99175	4.673	4.79175	4.974	4.824	4.6035	4.64175	4.9835	4.6735	4.8515	4.41075	4.84375	4.49075	5.06075	4.81325	5.0155	5.4115	5.03425	5.17825	4.73675	5.0585	4.87625	4.90525	5.508	4.937	5.01775	4.895	5.1825	4.75225	5.15725	5.09575	4.77	4.77875	3.75775	4.0175	3.5635	4.22975	3.77175	3.7535	3.526	4.29425	3.67175	3.532	4.074
ABCF3	4.82475	4.7405	4.8565	5.006	4.8355	5.373	4.896	4.81625	5.09475	4.7505	4.91525	4.87625	4.94475	4.56675	4.9535	4.78825	4.948	4.78825	4.76625	5.4115	5.4195	5.173	5.267	5.295	4.96875	5.27975	5.3725	5.05425	5.362	5.5495	5.38275	5.07975	5.18475	5.08675	5.55625	5.53375	5.4145	5.315	4.03075	4.494	4.35925	4.524	4.3155	4.3615	4.23725	4.729	4.4025	4.3125	4.314
ABCG1	7.4398	8.5486	7.2292	7.5078	8.6332	7.08	7.7908	7.937	8.4184	7.5436	8.0348	7.9436	8.0266	7.9528	7.7806	8.0088	7.2468	7.7976	7.7368	7.0276	7.5172	6.9128	8.3322	7.5244	7.7232	7.6054	7.779	7.6054	7.603	7.3788	8.141	7.0154	8.2548	7.4702	7.9422	8.3294	8.0518	7.9218	6.8026	7.3426	6.229	7.816	6.9284	6.6926	6.5344	7.3944	6.9796	7.1016	7.2862
ABCG2	2.9695	2.8075	3.292	3.328	2.89	3.7185	3.003	2.6925	3.503	4.659	3.4325	3.3585	3.362	3.373	3.5715	3.9315	3.6365	4.14	3.0495	4.1885	3.3825	5.6145	3.2145	3.7015	3.8935	4.21	3.678	4.9695	4.002	3.9205	3.3425	5.3125	3.7825	4.3065	3.8705	3.87	3.549	3.564	3.382	3.1295	3.5965	3.8	2.9935	3.3385	2.9925	3.3795	3.8515	3.9445	3.4355
ABCG4	2.189	1.88	1.98767	2.19667	2.04233	1.967	2.047	1.99933	2.08133	2.00233	2.028	1.98233	1.95633	1.93933	1.99867	1.95733	1.983	1.889	1.95733	2.75733	2.58767	2.67567	2.682	2.755	2.74933	2.63033	2.699	2.70833	2.77567	2.70967	2.71	2.71967	2.73567	2.61367	2.77	2.75167	2.74933	2.658	2.05367	2.271	2.13733	2.14767	2.26633	2.17433	2.09	2.159	2.15033	2.18233	2.20333
ABCG5	2.227	2.433	2.303	2.554	2.26	2.145	2.226	2.204	2.492	2.279	2.31	2.235	2.175	2.176	2.145	2.451	2.358	2.485	2.356	3.045	2.986	3.018	3.053	3.007	3.046	3.075	3.01	3.192	2.984	2.983	2.904	2.928	3.018	3.113	3.019	2.779	2.996	2.967	2.288	2.51	2.349	2.492	2.812	2.301	2.379	2.448	2.425	2.426	2.389
ABCG8	2.58	2.614	2.521	2.576	2.848	2.719	2.494	2.631	2.509	2.768	2.604	2.415	2.412	2.388	2.436	2.391	2.71	2.48	2.793	3.295	2.968	2.833	2.906	2.831	2.998	2.939	2.969	2.944	2.942	3.106	3.039	2.76	2.77	2.998	3.151	2.918	3.122	3.076	2.351	2.733	2.312	2.119	2.36	2.321	2.751	2.695	2.355	2.414	2.336
ABHD1	2.234	2.448	2.719	2.724	2.761	2.54	2.486	2.734	2.673	2.6	2.886	2.491	2.785	2.624	2.47	2.506	2.714	2.623	2.846	3.112	3.198	2.943	3.058	3.057	3.031	3.216	3.238	3.134	3.257	3.268	3.072	3.158	3.177	3.182	3.429	3.105	3.077	3.329	2.681	2.925	2.724	2.582	2.685	2.465	3.639	2.623	2.379	2.659	2.42
ABHD10	4.88933	5.14233	5.504	4.623	5.40067	5.22633	5.33067	5.91833	5.07767	5.36533	5.33933	5.89533	5.01167	5.48167	5.427	5.06	5.902	5.22567	5.09067	5.98467	6.06367	6.33233	5.74867	6.32667	5.59733	5.818	5.86167	5.96967	5.88567	5.51033	5.728	6.38567	6.059	6.35733	6.30967	5.82467	5.496	6.09867	6.76367	5.58733	6.201	5.86933	6.28467	6.01267	6.58833	5.17833	6.232	6.999	6.58367
ABHD11	3.58567	3.60567	3.507	3.52233	3.78083	3.42917	3.367	3.3615	3.642	3.5435	3.68633	3.466	3.53533	3.4285	3.56267	3.398	3.41117	3.1705	3.75	3.701	3.667	3.75367	3.75867	3.62183	3.84833	3.65417	3.81167	3.46283	3.76783	3.7115	3.61	3.67267	3.69617	3.66967	3.75217	3.75367	3.68433	3.7295	2.88083	3.1125	3.10133	2.9355	3.16833	3.07317	3.1515	3.3215	3.0165	2.986	3.03017
ABHD12	3.6148	3.7494	3.5714	3.9488	3.6564	3.6972	3.7576	3.6892	3.8538	3.726	3.4098	3.5656	3.8902	3.621	3.6276	3.6244	3.3898	3.7648	3.6092	4.5138	4.3408	4.2236	4.213	4.4242	4.157	4.5346	4.6932	4.2658	4.374	4.3514	4.3738	4.17	4.7224	4.2456	4.3392	4.1608	4.143	4.217	3.4516	3.254	3.4088	3.4614	3.2722	3.3572	3.859	3.7116	3.1256	3.1366	3.3042
ABHD12B	4.3715	4.618	4.0555	3.737	4.206	3.3145	4.1115	3.918	4.3525	3.35	4.503	3.859	3.9505	4.5235	3.318	4.152	3.416	3.928	3.716	3.606	3.454	3.0765	4.206	3.352	4.055	3.388	3.711	3.5905	3.817	4.356	3.8015	3.6735	3.338	3.631	3.8755	3.999	4.0885	4.2885	2.9405	3.556	3.6605	3.82	3.1615	3.672	2.5985	3.507	3.575	3.4365	3.8195
ABHD13	6.22	6.547	6.558	5.063	6.1545	6.977	6.64	6.972	5.8225	5.702	6.677	6.9165	5.8345	6.954	5.6075	6.495	6.7035	6.6675	6.462	7.4915	7.818	7.6525	7.1065	7.5485	7.595	7.475	7.321	7.748	6.6125	7.2285	7.0465	8.3495	7.274	7.8115	7.038	7.1025	7.2335	7.7515	8.1	6.985	8.009	6.9865	7.6835	7.087	7.8705	6.32	7.5355	8.296	8.302
ABHD14A	4.82	4.383	4.968	4.78	4.488	5.023	4.902	4.729	5.142	4.995	4.881	5.037	5.026	4.995	5.208	4.696	5.285	4.552	5.298	5.16	5.256	4.476	5.574	5.578	4.37	5.272	5.156	5.366	5.891	4.974	4.735	5.172	5.761	4.926	5.371	5.189	4.946	4.894	4.445	3.617	3.154	3.718	3.669	3.538	4.884	3.721	3.884	3.508	3.627
ABHD14A /// ACY1	2.459	2.445	2.46	2.298	2.39	2.703	2.224	2.611	2.42	2.738	2.614	2.206	2.785	2.338	2.635	2.734	2.58	2.276	2.436	3.093	3.049	3.194	3.21	3.023	3.314	3.237	3.018	3.397	3.123	3.396	3.107	3.296	3.339	3.036	3.111	3.004	3.199	3.087	2.401	2.759	2.798	2.476	2.564	2.458	2.705	2.562	2.673	2.701	2.435
ABHD14B	5.9915	5.7225	5.791	5.8735	5.3775	5.8615	5.6415	5.7965	5.894	5.988	5.8265	5.862	6.001	5.257	5.866	5.7525	5.776	5.4525	6.013	6.459	6.1745	6.191	6.1365	6.3535	5.941	6.55	6.35	6.4485	6.5915	6.0185	6.292	6.129	6.494	6.4135	6.425	6.382	6.234	5.822	5.4465	5.388	5.0415	5.626	5.1155	5.435	5.5145	5.5955	5.576	5.003	5.1695
ABHD15	5.8155	5.8985	6.2275	5.724	5.9435	4.6355	6.041	5.949	5.4805	5.974	5.7565	6.0255	5.9505	5.772	6.344	5.5905	5.9685	5.3915	6.0325	5.9135	5.7535	5.7245	5.6635	6.3925	5.2575	5.6835	5.7535	5.802	5.9285	5.5355	5.7665	5.372	6.047	5.5695	6.0325	5.6805	6.037	5.35	5.708	5.305	5.039	5.2475	4.661	5.067	5.3815	5.105	5.5035	5.447	4.86
ABHD2	7.0645	7.33475	6.454	6.8305	7.229	6.2905	6.8255	6.44575	7.242	6.533	7.3985	6.984	7.015	6.9745	6.90575	7.11025	5.97475	6.81925	7.247	7.547	7.461	7.05	8.12425	7.26	8.1925	7.4575	7.56825	7.26525	7.55325	7.7575	7.99075	7.2865	6.925	7.47175	7.42125	7.67475	7.769	7.693	6.373	6.96275	6.46	6.747	6.57575	6.89875	6.37375	7.34225	6.54475	6.2075	6.35725
ABHD3	7.7265	7.6045	6.915	6.581	7.617	8.256	7.713	7.524	7.1235	6.337	7.485	7.597	7.137	8.0715	7.1595	7.693	7.3395	7.628	7.696	7.8795	8.163	8.5615	8.2915	7.871	8.3935	7.733	8.253	7.9415	7.79	8.203	8.0335	8.311	7.7185	8.5175	7.9225	8.431	8.2725	8.8765	8.7985	7.9835	8.1585	7.813	8.589	7.632	7.8975	7.2675	7.835	9.056	8.472
ABHD4	3.90533	4.31033	4.058	4.257	4.25167	3.73667	4.14867	3.97133	4.411	3.88667	4.14633	3.92233	4.248	4.177	4.09967	4.19933	3.81567	4.14533	4.27667	4.139	4.27067	4.06767	4.242	4.067	4.228	4.10667	4.19167	4.08967	4.29267	4.34567	4.359	4.03667	4.042	4.009	4.083	4.42433	4.471	4.25733	3.44633	3.83833	3.50367	3.56767	3.676	3.54633	3.628	3.90767	3.60233	3.232	3.555
ABHD5	7.77917	8.57433	7.2905	7.34617	8.46467	7.34433	7.8805	7.638	8.23283	7.00017	8.17483	7.984	7.75233	8.22517	7.90283	8.56467	7.10183	7.99467	8.042	8.327	8.60533	7.85767	8.5875	7.61367	8.73517	8.46383	8.25983	8.30433	8.27883	8.72283	8.8495	8.44517	7.70083	8.46983	8.17883	9.07817	8.95433	8.79017	7.49283	8.6455	8.405	8.15133	8.259	8.11167	7.67733	8.265	7.83733	7.8185	8.38767
ABHD6	3.71467	3.785	3.59533	3.019	3.89133	2.71367	3.79867	3.69067	3.59267	3.66167	3.49367	3.71233	3.777	3.46567	3.64133	3.55867	3.43667	3.54067	3.63267	3.99767	3.99333	4.22967	4.12867	4.251	4.223	4.235	4.14533	4.06533	4.18367	4.19267	4.17267	3.86667	4.246	4.19167	4.029	4.05067	3.88067	3.944	3.53633	3.31933	3.46067	3.80833	3.646	3.52633	3.29433	3.52767	3.265	3.31267	3.68067
ABHD8	3.179	2.96233	3.12233	2.98267	2.963	3.10033	2.98367	3.00767	2.98633	3.227	3.05633	3.13367	3.22167	2.841	3.121	2.97833	2.82	2.85233	3.121	3.589	3.39233	3.48733	3.41533	3.46267	3.42233	3.753	3.51467	3.337	3.58133	3.442	3.60233	3.41267	3.28433	3.305	3.473	3.76767	3.53833	3.396	2.48167	2.72067	2.489	2.44667	2.72567	2.582	2.581	2.849	2.43333	2.32733	2.57967
ABI1	7.98567	7.99587	7.66173	7.7556	7.96067	8.34893	8.1352	7.94087	7.81887	7.57107	8.04893	7.97893	7.5166	8.07107	7.6712	8.05893	7.8116	7.93953	8.05367	7.98547	8.25913	8.24247	8.39873	8.05293	8.3366	8.12453	8.3252	8.18427	7.87047	8.196	8.22947	8.25747	8.24207	8.19347	8.1478	8.34227	8.59653	8.61387	7.80113	8.17587	8.15273	8.14007	8.0964	8.03427	7.83107	7.7446	8.07513	8.1806	8.17907
ABI2	3.831	3.78111	3.69933	4.22544	3.75589	3.77033	3.80133	3.73233	3.63722	3.81956	3.702	3.84622	3.61544	3.91644	3.94144	3.87267	3.98722	3.90567	3.573	4.21467	4.22589	4.17511	4.08833	4.317	4.14	4.39244	4.22778	4.13067	4.25189	4.05289	4.07233	4.06967	4.45389	4.24911	4.27411	4.24078	4.08244	3.97189	3.78467	3.50178	3.49267	3.70722	3.52089	3.586	3.62267	3.72133	3.936	3.85456	3.79689
ABI3	8.101	8.38	8.574	8.195	8.643	6.581	8.391	8.267	8.324	8.547	8.164	8.102	8.791	7.8	8.537	7.787	8.28	7.869	8.373	9.046	9.171	9.159	9.321	9.46	8.502	9.199	9.445	8.913	9.444	8.992	9.238	8.527	9.485	8.683	9.269	8.757	8.929	8.558	7.788	8.034	8.042	8.318	7.808	7.925	8.209	8.556	7.335	7.264	7.285
ABI3BP	2.146	2.1625	2.022	2.199	2.2175	2.2345	1.988	2.193	2.205	2.0595	2.1535	2.355	2.2555	2.1545	2.358	2.2935	2.1265	2.2215	2.408	2.671	2.803	3.0015	2.952	2.9025	2.878	2.9535	2.8905	3.01	2.8725	2.934	2.9815	3.0815	3.0945	2.956	2.7795	2.9875	2.7565	2.9695	2.783	2.5465	2.4475	2.303	2.418	2.4265	2.3675	2.248	4.0005	2.592	2.2865
ABL1	4.50925	4.3245	4.22675	4.13475	4.467	4.187	4.278	4.40975	4.437	4.4635	4.3435	4.30175	4.28975	4.02875	4.65825	4.419	4.44425	4.1605	4.40825	4.432	4.43525	4.46375	4.55925	4.36825	4.302	4.63025	4.48975	4.76525	4.75825	4.75425	4.48425	4.30625	4.5345	4.43375	4.56225	4.39375	4.797	4.3005	3.66825	3.52325	3.4405	3.9485	3.382	3.6765	3.5495	3.9495	3.15225	3.43475	3.46475
ABL2	5.05275	4.964	5.13575	5.20125	4.818	5.0575	4.93075	5.051	4.869	5.10625	5.0455	4.969	4.862	5.04575	5.12225	5.10325	5.1485	4.8715	5.028	5.21025	5.15525	4.844	5.39275	5.35725	5.28	5.18375	5.22625	5.30275	5.176	5.248	5.344	5.1605	5.3835	5.14175	5.36775	5.2485	5.40025	5.08725	4.61125	4.53525	4.803	4.8815	4.9535	4.9215	4.79	4.8845	4.83325	4.996	4.79375
ABLIM1	9.84175	9.147	9.48175	9.9195	9.31475	9.4565	9.26175	9.563	9.64475	9.72625	9.192	10.0813	9.41825	9.5865	9.897	9.72125	9.867	9.151	9.46125	9.4805	9.3735	9.13825	9.433	9.573	9.56225	9.68025	9.5455	9.809	9.93325	9.235	9.657	9.17825	9.62125	9.8155	9.94575	9.8575	9.917	9.39125	9.036	8.77625	8.8085	9.70325	8.98475	9.51925	8.95875	9.4145	9.21475	9.32975	8.99375
ABLIM2	2.9786	2.9234	3.169	3.088	2.8974	3.0798	2.977	3.3326	3.1786	2.99	2.9234	3.0734	3.1796	2.9656	2.8568	3.0074	2.9992	2.8998	3.0974	3.8246	3.6866	3.6872	3.7528	3.6876	3.7542	3.631	3.8264	3.6796	3.6586	3.8144	3.8146	3.7082	3.751	3.8196	3.9308	3.7972	3.9032	3.6554	2.7206	2.6938	2.7334	2.693	2.7146	2.827	2.755	2.719	2.754	2.5496	2.621
ABLIM3	2.92433	2.85767	3.36467	3.396	3.21067	3.271	3.25	3.081	2.88867	3.96867	3.041	3.21967	3.53133	3.507	3.59233	3.20733	3.335	3.269	2.96433	3.88267	3.707	3.69067	4.091	3.76033	3.95367	3.939	3.26333	3.784	3.606	4.09333	3.39833	4.03067	4.001	3.95067	4.09333	3.232	3.32633	3.34133	2.792	3.25367	2.77033	3.00467	3.328	2.91367	3.357	3.04567	3.23233	2.738	2.77533
ABO	2.664	2.499	2.573	2.682	3.268	2.713	2.367	2.657	2.711	2.741	2.589	2.591	2.505	2.305	2.597	2.522	2.567	2.483	2.823	2.818	2.754	2.783	2.707	2.649	2.604	3.07	2.7	2.686	2.926	2.79	2.754	2.819	2.555	2.705	2.682	2.905	2.898	2.935	2.199	2.155	2.108	2.02	2.184	2.24	2.308	2.268	2.318	2.136	1.73
ABP1	3.693	4.284	4.051	4.231	4.211	4.173	4.646	4.318	4.211	4.409	4.322	3.935	4.953	4.004	4.212	4.154	3.87	4.224	4.816	4.946	4.663	5.514	4.435	4.526	5.097	4.984	4.757	4.523	5.353	5.588	4.951	5.133	4.282	4.881	4.777	5.061	4.25	4.759	3.427	3.668	3.287	3.611	3.443	3.353	4.298	3.502	3.424	3.679	3.112
ABR	6.829	6.987	7.07025	6.737	6.889	7.0685	6.83825	6.77075	7.1895	6.8885	7.01275	6.88025	6.976	6.8955	6.8525	6.57875	6.55075	6.6695	7.1085	7.63475	7.46825	7.34075	7.7255	7.39525	7.59575	7.49875	7.671	7.366	7.743	7.86775	7.71525	7.17075	7.321	7.42425	7.69875	7.61525	7.70375	7.33675	6.06925	6.6	6.11375	6.3685	6.30175	6.401	6.00875	6.691	6.40725	5.99375	6.17
ABRA	3.1035	2.6605	2.9025	3.1215	2.8985	2.821	2.9205	3.0495	2.91	3.5525	2.894	3.1405	3.275	2.9395	3.2675	3.283	3.2475	3.609	3.0995	3.546	3.338	3.7415	3.512	3.7515	3.634	3.743	3.732	3.5095	3.8465	3.578	3.655	3.866	3.657	3.405	3.2925	3.383	3.8265	3.7825	3.3195	3.5265	3.389	3.598	3.106	3.4865	3.605	3.4815	3.261	3.431	3.2855
ABT1	5.918	5.845	5.96	5.4805	5.6805	6.0735	6.061	5.874	5.7685	5.8515	5.926	6.0715	5.747	5.8455	5.8275	5.596	6.073	5.672	6.1905	5.91	6.267	6.1045	6.2825	6.2165	5.846	5.981	5.876	6.1175	5.997	5.4035	6.09	6.086	5.857	6.0115	6.404	6.1395	5.736	5.6815	5.5925	5.357	5.3395	5.5155	5.384	5.441	5.7315	5.3355	5.713	5.6515	5.788
ABTB1	5.7496	5.9946	5.4268	5.7246	5.7558	5.3252	5.3806	4.9338	6.2898	5.4884	5.9212	5.391	5.8578	5.7766	5.573	5.9698	4.6724	5.3548	5.7044	6.0772	6.0356	5.6142	6.0402	5.3894	6.5908	5.6788	5.9154	5.7012	6.1304	6.2782	6.1054	6.101	5.0564	5.5926	5.6452	6.0322	6.0552	6.011	4.0884	5.2026	4.8144	4.788	5.0002	4.6748	4.5248	5.383	4.3218	4.1676	4.7986
ABTB2	3.7	3.517	4.0075	4.176	3.6845	3.962	3.912	4.163	4.033	3.748	4.0565	3.98	3.913	4.114	3.688	3.8065	3.8025	3.6985	3.6515	4.027	4.322	4.3095	4.3255	4.196	4.182	4.119	4.0695	3.9835	4.3645	4.453	4.4385	3.9065	3.911	4.7345	4.7345	4.1905	4.414	4.377	2.964	3.707	3.2485	3.2845	3.0905	3.0705	3.558	3.5755	3.272	3.3315	3.1805
ACAA1	5.50683	5.43833	5.4785	5.57833	5.40233	5.419	5.54833	5.29267	5.73617	5.26117	5.54267	5.33317	5.465	5.56283	5.17733	5.14217	5.20517	5.00467	5.38333	5.6345	5.509	5.36233	5.61317	5.16683	5.78933	5.41317	5.4585	5.1555	5.722	5.653	5.732	5.53967	5.1645	5.40467	5.6825	5.4395	5.375	5.7385	4.057	4.8765	4.718	4.5365	4.76417	4.63683	4.39783	4.91233	4.617	4.66317	4.71733
ACAA2	8.154	7.767	8.101	7.858	8.053	7.756	8.03	8.126	7.896	8.34	8.049	7.835	8.131	7.862	8.225	7.756	8.031	7.629	8.137	8.719	8.825	9.129	8.775	8.995	8.557	8.544	8.845	8.75	9.056	8.75	8.62	8.677	9.021	8.908	8.974	8.91	8.764	8.57	8.956	8.203	8.417	7.668	8.115	8.111	8.282	7.879	8.255	7.817	7.61
ACACA	3.81333	3.66967	4.00933	3.77967	3.768	3.91867	3.87367	4.00133	4.07467	3.69	3.69	3.95867	3.61867	3.776	3.627	3.641	3.61967	3.605	3.68533	4.46133	4.368	4.395	4.20333	4.56067	4.082	4.39333	4.42167	4.40867	4.348	4.331	4.48367	4.07033	4.48867	4.34133	4.428	4.29333	4.374	4.16667	3.77	3.68967	3.64633	3.843	3.68467	3.652	3.48333	3.92167	3.56267	3.587	3.443
ACACB	3.73533	3.548	3.69733	3.782	3.685	3.821	3.78767	3.71967	3.93667	3.79433	3.764	3.84033	3.846	3.67233	3.85567	3.75733	3.65833	3.44467	3.649	4.22667	3.982	3.86433	4.07667	4.02633	4.28333	4.05533	3.896	4.429	4.27067	4.15267	4.15267	3.821	4.02167	4.27667	4.22333	4.04167	4.183	4.35467	3.11333	3.758	3.225	3.40233	3.27367	3.61933	3.05367	3.41967	3.44667	3.30467	3.24933
ACAD10	3.79667	3.7765	3.71983	3.59883	3.78183	3.8575	3.81317	3.73033	3.899	3.8025	3.7255	3.6825	3.71267	3.6295	3.66933	3.64683	3.761	3.5025	3.95567	4.2255	4.16933	4.12967	4.1865	4.16067	4.32133	4.407	4.347	4.13983	4.43367	4.29567	4.36267	4.093	4.299	4.07317	4.43833	4.34033	4.28817	4.29767	2.98067	3.41967	3.41383	3.48017	3.39333	3.42183	3.39733	3.556	3.167	3.212	3.34217
ACAD11 /// NPHP3	4.4585	4.167	4.159	4.4715	4.6235	4.645	4.4015	4.5365	4.638	4.54	4.437	4.853	4.4825	4.4885	4.8285	4.5435	4.21	4.5285	4.2385	4.625	4.786	4.7275	4.5125	4.648	4.495	4.835	4.6295	4.794	4.4735	4.327	4.764	4.676	5.1965	4.8145	4.767	4.792	4.516	4.6705	3.959	4.105	4.5085	4.4955	4.1165	4.524	4.2935	4.4945	4.582	4.4525	4.441
ACAD8	3.76867	3.82833	3.95833	3.60367	4.21667	3.723	3.786	3.97967	3.83017	3.84017	3.77483	4.02917	3.809	3.93867	3.8255	3.72683	4.0115	4.0525	4.11467	3.897	3.89767	4.02517	3.9675	4.01933	3.96367	3.941	3.901	3.888	3.98983	3.87633	3.93267	3.76867	3.94883	3.84117	3.96917	3.8685	4.00517	3.75483	3.30783	3.491	3.673	3.73417	3.498	3.55267	3.40717	3.482	3.6585	3.463	3.64917
ACAD9	4.966	5.02625	5.33625	4.98	5.023	4.42075	5.0945	5.007	5.27475	5.07525	5.05275	5.15375	5.338	5.053	5.211	5.05375	5.27525	4.85375	5.1155	5.5595	5.55875	5.501	5.431	5.52025	5.34825	5.573	5.499	5.45175	5.659	5.5385	5.78275	5.38025	5.92875	5.2355	5.632	5.66525	5.3905	5.56725	4.852	4.79775	4.9865	5.133	4.72175	4.984	4.54125	4.95775	4.69	4.789	4.70025
ACADL	2.294	2.3005	2.2345	2.83625	2.1655	2.438	2.12925	2.22375	2.28675	2.20075	2.32475	2.30675	2.292	2.1745	2.122	2.2305	2.138	2.313	2.325	2.64175	2.7125	2.87925	2.87425	2.851	2.80625	2.958	2.793	2.8445	2.7555	2.8955	2.81925	2.96625	2.85075	2.861	2.86725	2.86	2.95825	3.24425	2.38475	2.38425	2.31425	2.27725	2.36275	2.26525	2.367	2.3365	2.45825	2.46825	2.32325
ACADM	6.67529	6.67086	6.982	6.35714	6.56743	5.41571	6.88357	7.27457	6.12657	7.216	6.83457	6.88957	6.26357	7.05043	7.09171	6.56886	7.21657	6.54157	6.69743	6.922	6.93757	7.34643	6.82171	7.28943	7.78757	7.13314	7.007	6.977	6.143	6.76014	6.93243	7.32243	6.97186	7.54714	6.66214	6.88786	6.85571	6.80857	7.38386	6.81657	6.88857	6.86814	7.332	7.18557	7.19829	6.50957	6.834	7.455	7.33929
ACADS	2.805	2.6185	2.6295	2.429	2.6315	2.2585	2.4765	2.5775	2.744	2.88	2.557	2.5475	2.741	2.413	2.529	2.3945	2.6145	2.4985	2.7025	3.021	2.9225	2.8265	3.06	3.0565	2.9685	3.147	2.9505	2.795	3.232	3.1765	3.034	2.7805	3.0855	3.1575	3.292	3.1395	2.842	2.9285	2.4055	2.664	2.281	2.229	2.3335	2.403	2.3465	2.4215	2.5645	2.184	2.318
ACADSB	4.2425	4.032	4.291	3.939	4.617	4.5825	4.387	4.748	4.4985	4.1285	4.3415	4.533	4.1055	4.326	4.3535	4.0305	4.496	4.5905	4.309	4.703	4.967	4.7875	4.6725	4.9965	4.3905	4.733	4.623	5.1045	4.667	4.437	4.5655	5.259	5.0405	5.038	4.6195	4.7915	4.7585	4.993	5.3845	4.4145	4.924	4.709	4.998	4.564	5.2495	4.1795	5.2325	5.5175	5.137
ACADVL	6.66367	6.44567	6.549	6.26533	6.45533	6.566	6.21933	6.19533	6.76467	6.30333	6.11633	6.21767	6.68033	6.164	6.46267	6.06733	6.19867	6.246	6.43133	6.653	6.62467	6.69267	6.535	6.43433	6.698	6.67933	6.55033	6.21467	6.92733	6.51033	6.72	6.59067	6.00167	6.387	6.67367	6.39033	6.54	6.439	5.57567	6.08133	5.697	5.77033	5.401	5.76767	5.65567	6.157	5.64767	5.22467	5.356
ACAN	2.84325	2.7895	2.88375	2.8285	2.813	2.99625	2.682	2.776	3.096	2.793	2.85375	2.69525	2.98375	2.75775	2.77475	2.843	2.77075	2.70825	2.86575	3.11	2.871	3.1415	3.0815	3.091	3.05625	2.97975	3.16625	3.2625	2.913	3.18125	3.0505	3.11125	3.14875	2.9095	3.19125	3.03025	3.161	3.134	2.70475	2.646	2.625	2.5875	2.57325	2.49575	2.624	2.60425	2.67425	2.58225	2.4985
ACAP1	8.241	7.951	8.448	8.574	7.718	8.3	8.146	8.356	8.778	8.28	8.198	8.244	8.427	8.21	8.144	8.278	8.434	7.982	7.983	8.681	8.55	8.35	8.477	8.588	8.924	8.729	8.715	8.455	8.982	8.739	8.635	8.526	8.732	8.504	8.869	8.909	8.518	8.853	7.54	8.061	7.803	7.745	7.844	7.635	8.295	7.925	8.169	7.597	7.919
ACAP2	8.2055	8.226	7.865	7.596	8.106	7.7055	8.1595	7.75	7.9575	7.3595	8.135	8.028	7.6395	8.2865	7.697	8.113	7.6995	8.2265	8.044	8.627	8.6595	8.6245	8.6975	8.2745	9.187	8.559	8.796	8.592	8.588	8.823	8.6715	8.8715	8.417	8.7045	8.5775	8.821	8.9075	8.867	7.989	8.482	8.3645	8.236	8.332	8.364	8.048	8.2635	8.4655	8.3755	8.559
ACAP3	3.916	4.135	3.9015	3.834	3.8695	4.484	3.7105	3.8875	3.905	3.752	3.754	3.479	4.034	3.578	3.608	3.6375	3.826	3.713	3.751	4.434	4.274	4.2825	4.134	4.323	4.137	4.569	4.0965	4.206	4.442	4.294	4.2975	4.032	4.387	4.275	4.335	4.116	4.2615	4.299	3.264	3.447	3.168	3.2045	3.1835	3.295	3.4875	3.287	3.4395	3.1735	2.895
ACAT1	4.842	4.767	4.8955	4.483	4.637	4.6215	4.6225	5.0025	4.7145	4.6435	5.013	5.069	5.052	4.928	5.4415	4.869	5.25	4.784	4.5445	5.227	5.3935	5.2035	5.343	5.3965	5.049	5.535	5.064	5.1745	5.429	5.034	5.183	5.653	5.4675	5.666	4.9745	5.103	4.9065	5.158	5.465	4.753	5.235	4.923	5.3725	4.99	5.223	4.4985	5.328	5.418	5.149
ACAT2	8.02533	7.64433	8.13633	7.92533	7.63733	8.211	7.85467	7.78233	7.91667	7.943	7.74167	7.85	7.99933	7.78033	7.949	7.814	8.01	7.76133	7.847	8.562	8.531	8.38767	8.234	8.44233	7.92367	8.449	8.275	8.33533	8.612	8.113	8.199	8.38867	8.436	8.533	8.56533	8.20067	8.334	8.38667	8.06467	7.81533	8.036	7.93667	7.79733	8.15733	8.20867	8.09867	8.17667	8.15867	7.93367
ACBD3	6.1265	6.1005	5.275	5.363	5.887	5.6475	6.095	6.025	5.4515	4.9575	5.7665	6.1375	5.945	5.5715	5.6405	5.856	5.898	5.7975	5.5725	5.844	6.3495	6.0785	5.9465	6.5185	6.564	5.965	6.4205	5.9205	6.1565	5.891	6.35	6.043	6.197	6.3145	5.9765	6.4465	6.2025	6.3305	6.38	5.876	5.736	5.685	5.735	6.137	5.8685	5.502	5.512	5.696	5.85
ACBD4	4.681	4.194	4.8905	4.0115	3.7565	3.8215	4.176	4.1625	4.758	4.3505	4.081	4.744	4.8245	4.338	4.7315	4.271	4.6465	4.344	4.4665	4.989	5.193	4.7935	4.8605	5.186	4.6525	5.2365	5.258	5.0925	5.195	4.86	4.883	5.4205	5.285	5.24	5.288	5.0995	5.1455	4.4355	4.605	3.753	3.9035	4.031	4.197	4.073	4.357	4.1005	3.839	4.0705	3.941
ACBD5	7.2165	7.492	7.438	6.8725	7.648	7.4505	7.6715	7.3575	6.845	6.991	7.2775	7.533	6.9105	7.5405	7.436	7.519	7.3675	7.6605	7.5605	7.938	8.199	8.267	8.036	8.074	7.8875	7.8515	8.229	8.1355	7.7995	7.7205	7.9945	8.1175	8.605	8.1045	7.899	8.0565	8.118	7.8035	8.2615	7.5405	8.1405	7.881	7.7375	7.624	7.634	7.534	7.9105	8.101	8.016
ACBD6	6.4385	6.687	6.419	6.4745	6.394	7.4705	6.501	6.6935	6.851	6.5675	6.6505	6.7185	6.691	6.2735	6.785	6.642	6.878	6.2595	6.227	6.9055	7.1625	6.948	6.9075	7.034	6.6435	7.287	6.99	7.0705	7.3765	6.7115	6.882	6.8555	7.3885	6.987	7.0775	7.0545	6.753	7.273	7.17	6.5185	6.6805	6.493	6.448	6.385	6.7885	6.809	6.4795	6.382	6.7405
ACBD7	2.706	2.561	3.1115	2.778	2.7315	3.134	3.1005	2.8175	3.153	2.656	2.6495	2.6955	2.723	2.7065	2.7005	2.678	2.49	2.6455	2.804	3.0665	2.974	3.0885	2.9095	3.123	3.041	3.138	3.3395	3.1495	3.148	3.1285	3.1215	3.3695	3.1485	3.1975	3.08	3.0365	3.2265	3.0485	2.558	2.444	2.5205	2.4625	2.693	2.584	2.4645	2.711	2.5835	2.5635	2.917
ACCN1	2.6455	2.7215	2.711	3.101	2.716	2.92	2.7285	2.728	2.8885	2.9	2.808	2.6915	2.7815	2.714	2.719	2.787	2.687	2.9165	2.811	2.9015	2.942	3.0545	3.058	3.0815	3.0845	3.073	3.0585	2.988	2.8955	2.933	3.126	3.152	3.2165	2.977	3.0815	2.9185	3.0805	3.172	2.632	2.643	2.796	2.7135	2.7385	2.578	2.6205	2.528	2.489	2.5335	2.4265
ACCN2	2.87767	2.33567	2.305	2.69933	2.35667	2.41067	2.20667	2.358	2.73567	2.22333	2.503	2.40633	2.48733	2.47267	2.50233	2.50167	2.53167	2.40067	2.51833	2.97867	2.82233	2.83833	3.02167	2.92633	2.94667	2.805	3.065	2.938	3.024	3.049	2.94433	2.92167	2.976	2.96833	2.97467	2.86433	3.113	3.106	2.62967	2.46067	2.467	2.58067	2.85567	2.51367	2.49733	2.33433	2.38067	2.46267	2.66333
ACCN3	4.305	3.707	4.157	3.881	3.703	5.386	3.491	3.835	4.226	4.29	4.408	3.8	4.355	3.746	3.911	3.971	4.473	3.693	4.074	5.592	5.464	5.651	5.145	5.732	4.524	6.062	5.112	5.397	5.908	5.039	5.662	5.72	5.373	5.727	6.266	5.152	4.889	5.165	4.309	4.136	3.73	3.933	3.471	4.404	3.927	4.642	5.152	4.168	3.864
ACCN4	3.369	3.3875	3.4	3.4	3.347	3.14	3.009	3.258	3.2905	3.4125	3.206	3.238	3.558	3.171	3.363	3.1945	3.397	3.257	3.4695	3.46	3.2565	3.325	3.5545	3.54	3.6575	3.555	3.3185	3.7085	3.352	3.63	3.352	3.445	3.6335	3.354	3.5235	3.3925	3.672	3.4625	2.4835	2.597	2.6785	2.5055	2.665	2.614	2.432	2.58	2.5755	2.674	2.515
ACCN5	2.017	1.947	2.139	2.296	2.037	2.353	2.128	2.158	2.107	2.093	2.321	2.179	2.162	2.058	2.334	2.282	2.33	2.232	2.164	3.361	3.034	3.02	3.045	3.137	3.018	2.929	3.215	3.127	3.113	3.014	3.083	3.093	3.058	3.034	2.998	3.046	3.212	3.127	2.618	2.492	2.518	2.527	2.59	2.564	2.5	2.682	2.441	2.651	2.751
ACCS	4.1155	4.34975	4.046	4.38225	4.14675	4.2095	3.97475	4.055	4.2725	3.9415	3.9885	3.925	4.081	4.6285	4.0115	4.264	4.0485	3.84225	4.27525	4.28075	4.1335	4.2115	4.09675	4.4395	3.9605	4.048	4.106	4.24175	4.02825	4.04525	4.27375	4.08425	4.2605	4.12975	4.3445	4.27775	4.253	4.4065	3.3595	3.6835	3.6195	3.437	3.985	3.98975	3.69225	3.63675	3.64825	3.44875	3.27175
ACCSL	2.073	2.01	2.049	2.278	1.936	2.032	1.981	1.936	1.945	1.948	1.999	2.126	2.128	2.009	2.165	1.938	1.829	2.359	2.147	2.802	2.713	2.713	2.515	2.727	2.579	2.594	2.528	2.898	2.495	2.642	2.83	2.649	2.673	2.665	2.709	2.608	2.816	2.6	2.163	2.194	2.283	2.187	2.31	2.367	2.383	2.318	2.214	2.256	2.154
ACD	4.082	4.28167	4.155	4.211	4.14833	4.07533	4.069	4.11967	4.50367	4.236	4.08767	4.20967	4.19167	4.10567	4.21467	4.00833	4.15433	4.021	4.264	4.75633	4.9	4.67933	4.84267	4.96433	4.771	4.878	4.84867	4.74567	5.17167	4.89567	4.911	4.78867	4.803	4.776	4.98	4.83833	4.918	4.76067	4.21733	4.36767	4.07133	4.204	4.23433	4.15867	4.21467	4.53033	4.48067	3.978	4.23933
ACE	2.63425	2.66475	2.51875	2.75525	2.58375	2.54975	2.54525	2.52225	2.6545	2.5335	2.564	2.486	2.667	2.44325	2.46425	2.524	2.503	2.29375	2.5565	3.102	3.1245	3.06425	3.09525	3.0555	3.0445	3.00475	3.0735	3.05725	3.13175	3.04375	3.035	2.98125	3.07625	3.012	3.09675	3.045	3.236	3.13325	2.4185	2.585	2.513	2.4095	2.51	2.48925	2.552	2.52575	2.5015	2.47625	2.455
ACE2	2.792	2.654	2.44067	2.72467	2.72967	2.73667	2.46533	2.51167	2.453	2.62	2.68633	2.428	2.48433	2.57367	2.53433	2.52133	2.49933	2.616	2.41167	3.02833	3.01233	3.12633	2.98833	2.95867	3.037	2.97733	2.988	3.00867	2.94833	3.01033	3.00833	3.10667	2.987	2.855	2.96733	2.97567	3.15667	3.22767	2.531	2.65767	2.503	2.354	2.44067	2.43567	2.59667	2.45833	2.47533	2.543	2.47967
ACER1	2.187	1.931	1.963	2.213	1.772	2.045	2.115	1.749	2.153	2.046	2.026	1.832	2.298	2.052	1.981	1.862	2.123	1.944	2.388	2.812	2.876	2.757	2.828	2.719	2.755	2.699	2.831	2.599	2.822	2.706	2.834	2.909	2.883	2.853	2.786	2.881	2.815	2.891	2.497	2.665	2.537	2.417	2.435	2.61	2.565	2.558	2.895	2.479	2.649
ACER2	2.323	2.278	2.176	2.304	2.188	2.294	1.965	2.174	2.189	2.469	2.273	2.196	2.072	2.029	2.387	2.353	2.55	2.563	1.988	2.758	2.769	2.766	2.802	2.887	2.909	2.812	2.686	2.885	2.721	2.729	2.774	2.811	2.972	2.855	2.831	2.987	2.836	3.038	2.125	2.475	2.405	2.171	2.217	2.439	2.528	2.202	2.292	2.611	2.249
ACER2 /// LOC645978	3.179	2.778	2.9075	3.0925	2.845	3.1215	2.8865	3.0285	2.9885	2.7665	2.82	3.104	3.136	3.3095	3.025	3.0695	3.21	3.172	2.988	3.7505	3.5885	3.6175	3.71	3.644	3.691	3.5405	3.7505	3.7475	3.783	3.7425	3.6445	4.0515	3.899	3.9795	3.846	3.507	3.7045	3.7425	3.201	2.6595	2.6605	3.112	2.686	3.4325	3.009	3.2165	2.6985	3.0085	2.7305
ACER3	4.63967	4.62367	4.93217	4.42117	4.86517	4.936	4.65317	4.64167	3.9695	4.83167	4.5125	4.5815	5.045	4.73667	4.48567	4.36567	4.71117	4.61867	4.78233	5.764	5.05467	5.36283	5.38833	5.2605	5.49183	5.52933	5.31217	5.2555	5.39117	5.28133	5.26833	5.23183	5.00833	5.49	5.19067	5.19033	5.08	5.44183	4.61517	4.606	4.822	4.92233	4.68417	4.77367	4.20067	4.9915	4.462	4.93567	4.752
ACHE	2.349	2.346	2.5055	2.292	2.417	2.279	2.331	2.233	2.6375	2.6175	2.574	2.262	2.3035	2.3145	2.335	2.6185	2.2575	2.4635	2.421	3.6005	3.1115	3.9555	2.889	3.0665	3.074	2.8795	3.091	2.998	2.963	3.1475	3.131	2.991	2.901	3.1655	3.051	3.1255	3.2105	3.0665	2.538	2.7605	2.6785	2.547	2.528	2.585	2.4405	2.6885	2.589	2.6235	2.5325
ACIN1	7.09767	7.11767	6.90033	7.02267	7.09067	6.968	6.98867	7.03467	7.26567	7.07033	7.05533	7.09167	7.292	7.03267	7.14433	7.23967	6.92967	7.001	7.19867	7.56233	7.46167	7.547	7.708	7.51833	7.887	7.748	7.806	7.538	7.89667	7.79667	7.77467	7.38967	7.65367	7.445	7.547	7.872	7.53633	7.69333	6.377	6.937	6.67067	6.89367	6.958	6.66467	6.335	7.096	6.64833	6.78967	6.68733
ACLY	7.905	8.194	7.867	8.009	7.9735	7.5475	7.924	7.838	7.848	7.8395	7.776	7.7765	7.9105	7.5785	8.1085	7.646	7.7735	7.679	7.983	8.2035	8.099	8.0565	8.258	8.299	8.092	8.285	8.066	7.7455	8.319	8.2415	8.27	7.977	8.1685	8.24	8.193	8.093	8.27	7.959	7.695	7.427	7.215	7.7045	7.176	7.4255	6.7945	7.679	7.364	7.2235	7.1945
ACMSD	2.637	3.202	2.758	2.957	2.884	3.046	2.99	2.789	3.081	2.92	2.897	2.972	3.18	2.916	2.592	2.812	2.926	2.914	3.399	3.145	3.361	3.102	3.349	3.143	3.041	3.111	3.162	3.026	3.185	3.117	3.221	3.209	3.212	3.088	3.28	3.013	3.219	3.314	2.35	2.488	2.408	2.475	2.456	2.558	2.473	2.674	2.513	2.586	2.445
ACN9	6.962	6.677	7.257	5.776	6.396	6.899	6.969	7.382	6.116	5.991	7.078	7.101	6.25	7.177	6.731	6.873	7.303	6.521	6.965	8.062	7.682	8.132	7.483	8.128	7.552	7.708	7.513	8.009	7.924	7.341	7.647	8.285	8.21	7.946	7.676	7.737	7.561	7.738	9.136	7.116	8.263	6.977	7.516	7.194	8.249	7.075	7.933	8.59	8.353
ACO1	4.606	4.614	4.23	4.298	4.1775	3.7305	4.5355	4.537	4.249	4.499	4.309	4.214	4.6615	4.4845	4.3365	4.2075	4.2785	4.8375	4.152	5.376	5.4635	5.531	5.5615	5.44	5.367	5.3685	5.37	5.6865	5.591	5.589	5.522	5.16	5.5455	5.411	5.2835	5.511	5.1785	5.1635	4.4005	4.0985	4.0515	4.1135	4.101	4.1395	4.054	4.3565	3.5895	3.9445	3.943
ACO2	6.126	5.9215	6.1595	6.2925	5.988	5.346	5.728	5.8305	6.134	6.615	5.957	5.762	6.3005	5.618	6.3785	5.8325	6.1325	5.889	6.055	5.3815	5.4895	5.4755	5.5865	5.518	5.534	5.629	5.5555	5.378	5.7455	5.479	5.617	5.578	6.1775	5.26	5.457	5.636	5.4375	5.3635	5.4315	5.195	4.8245	4.869	4.52	4.8775	4.528	5.2695	4.666	4.2785	3.9805
ACOT1 /// ACOT2	5.156	4.493	4.429	4.797	4.738	5.256	4.755	5.063	4.809	4.88	4.47	4.462	4.984	4.465	4.728	4.75	5.175	4.19	4.386	4.415	4.597	4.298	4.371	4.292	4.267	4.373	4.449	4.167	4.551	3.998	4.442	3.741	4.657	4.562	4.778	4.03	4.464	4.375	4.386	4.028	4.168	4.135	3.935	4.056	4.33	4.305	4.157	3.938	4.132
ACOT11	3.20133	2.92733	3.44833	3.04967	2.86867	3.054	3.19767	3.26	3.22767	2.86633	2.91867	2.822	3.27567	2.899	2.94967	2.78633	2.96567	2.99367	3.07967	3.741	3.423	3.57433	3.69067	3.444	3.449	3.43933	3.643	3.61233	3.92433	3.697	3.79533	3.48767	3.498	3.44133	3.64433	3.37133	3.51367	3.97267	2.59033	3.035	2.67567	2.76433	2.77233	2.56967	2.53467	2.87533	2.73533	2.72567	2.55467
ACOT12	2.404	2.2435	2.3405	3.0515	2.1355	2.6845	2.469	2.3025	2.5275	2.2355	2.263	2.138	2.2585	2.156	2.5585	2.3	2.3305	2.376	2.204	2.8795	2.705	2.886	2.9005	2.869	2.893	2.9785	2.98	2.9625	2.864	2.8715	2.703	2.9395	2.819	2.712	2.8845	2.808	3.282	2.929	2.439	2.3485	2.384	2.3455	2.2305	2.372	2.3145	2.4555	2.3085	2.4275	2.331
ACOT13	7.464	7.378	7.453	7.313	7.076	6.951	7.002	7.292	7.598	6.927	7.535	7.232	7.386	7.202	6.96	7.9	7.498	7.094	7.622	7.829	7.852	7.453	7.587	7.747	7.531	7.62	7.655	7.155	7.435	7.356	7.436	8.023	7.436	7.465	7.939	7.425	7.957	8.119	7.945	7.586	7.841	6.848	7.918	7.602	7.802	7.283	8.143	7.908	7.825
ACOT4	3.435	2.955	3.996	2.639	3.567	3.506	3.459	3.184	3.226	3.708	3.124	2.872	3.532	3.126	3.826	2.91	3.119	2.994	3.155	4.244	4.339	4.447	3.733	4.231	3.503	3.921	4.17	3.105	3.869	3.532	3.427	3.935	4.905	3.733	3.919	3.647	3.355	3.451	4.469	3.047	3.332	3.128	3.444	2.936	4.287	3.399	3.394	2.89	3.087
ACOT6	2.244	2.106	2.143	2.403	2.447	2.251	1.993	2.238	2.672	2.308	2.088	2.059	2.436	2.293	2.052	1.909	2.098	2.234	2.252	2.762	2.709	2.72	2.833	2.879	2.686	2.796	2.645	2.827	2.738	2.895	2.864	3.155	2.775	2.975	2.785	2.841	2.783	2.781	2.288	2.242	2.268	2.404	2.125	2.354	2.443	2.275	2.373	2.559	2.268
ACOT7	3.2065	3.872	3.406	3.545	3.4785	3.656	3.3935	3.44	3.6655	3.739	3.377	3.6405	3.533	3.4925	3.4675	3.18	3.479	3.2865	3.603	3.9805	3.6625	3.6885	3.921	3.955	3.492	4.0315	3.8825	3.9055	3.9615	3.791	4.057	3.6905	3.9575	3.744	3.7225	3.675	3.7935	3.6055	3.173	3.2505	3.0135	2.877	2.81	2.9365	3.2925	2.9225	3.0305	2.7345	2.6455
ACOT8	3.13833	3.15067	3.1015	3.073	3.1505	3.121	3.07067	2.97233	3.1365	3.001	3.207	3.14067	3.296	2.95633	3.13233	3.0315	3.1295	2.94817	3.20867	3.32367	3.252	3.26567	3.28367	3.1675	3.37467	3.33883	3.34417	3.3075	3.37433	3.42083	3.34033	3.225	3.14833	3.1865	3.3415	3.26883	3.222	3.41567	2.69883	2.91017	2.83183	2.759	2.63667	2.80683	3.05817	2.94667	2.76383	2.7915	2.76483
ACOT9	7.2105	7.4535	6.94225	7.261	7.3175	6.7625	7.40975	7.13975	7.204	7.209	7.1525	7.02475	7.03975	7.20075	7.15375	7.03825	6.87875	7.2595	7.19	7.2605	7.23225	7.2155	7.45225	7.09375	7.648	7.00875	7.63025	7.0995	7.20875	7.171	6.96025	6.84575	7.093	7.0525	7.22725	7.13675	7.40625	7.35725	6.355	7.11875	7.143	6.80425	7.2835	7.20775	6.65775	7.10125	6.71925	6.5015	6.80425
ACOX1	8.66333	8.94967	8.01133	8.32833	8.91167	6.73833	8.12833	8.12933	8.683	7.98867	8.88267	8.23667	8.473	8.949	8.63033	8.81233	7.66033	8.56333	8.893	9.04567	8.27467	8.277	9.30267	8.47533	9.72267	9.02867	9.05667	8.629	9.022	9.17167	9.37067	8.53867	7.80633	8.63267	8.49933	9.119	9.34633	8.83467	8.01533	9.25267	8.5	8.34567	8.827	8.538	7.78	9.076	8.36267	8.09967	8.18967
ACOX2	2.94	2.873	2.891	2.895	2.63	2.572	2.239	2.387	2.732	2.866	2.63	2.723	2.813	2.458	2.614	2.869	2.903	2.551	2.891	3.339	3.168	3.261	3.335	2.974	3.326	3.208	3.273	3.029	3.646	3.216	3.102	3.048	3.26	3.151	3.307	3.288	3.11	3.262	2.31	2.725	2.688	2.74	2.485	2.629	2.751	2.438	2.517	2.691	2.499
ACOX3	4.28	4.073	4.469	3.642	4.587	2.392	4.514	4.274	4.094	4.801	4.725	4.783	4.882	4.137	4.216	3.938	4.521	4.422	4.475	4.882	4.633	4.606	5.062	5.117	4.662	4.78	4.951	4.739	5.388	5.068	4.984	5.228	5.07	5.315	5.975	4.965	4.572	4.847	4.762	3.407	3.7	4.491	3.982	3.682	4.197	4.846	4.231	4.537	3.999
ACOXL	2.18775	2.026	2.094	2.18875	2.11675	2.332	2.09975	2.02775	2.3625	2.0475	2.094	2.1165	1.9545	2.008	2.25575	2.0185	2.01575	2.013	2.03175	2.76575	2.756	2.76925	2.79775	2.932	2.75975	2.76375	3.0295	3.05775	2.68025	2.728	2.74175	2.737	2.7635	2.6545	2.8175	2.743	2.92375	2.70875	2.3355	2.1705	2.24275	2.08975	2.2095	2.144	2.22525	2.15625	2.254	2.215	2.197
ACP1	5.91475	5.76025	6.14725	5.89575	5.7485	6.35625	5.87575	6.07275	5.865	6.34375	5.97875	5.973	5.9235	6.004	6.11225	6.153	6.05775	6.03025	5.8395	6.69525	6.50375	7.04875	6.24925	6.62	6.38175	6.46275	6.5025	6.659	6.3945	6.377	6.36875	6.847	6.8135	6.5735	6.41675	6.44875	5.74	6.3255	6.06325	6.0675	6.1365	5.956	6.2535	6.0555	6.2465	5.964	6.2675	6.1975	6.153
ACP2	3.36933	3.15956	3.29856	3.19578	3.23267	2.98378	3.04778	3.11756	3.203	3.29856	3.12567	3.03433	3.31289	3.08033	3.24733	3.05789	3.22422	2.964	3.30522	3.671	3.59233	3.501	3.47922	3.52956	3.351	3.34489	3.49633	3.35356	3.51611	3.47833	3.64011	3.41222	3.53789	3.408	3.64989	3.48022	3.56378	3.47856	2.654	2.86656	2.70333	2.78444	2.66767	2.76467	2.65789	2.83789	2.708	2.69233	2.67956
ACP5	3.394	3.719	3.389	3.781	3.596	3.43	3.399	3.468	3.578	3.883	3.521	3.457	3.459	3.888	3.25	3.319	3.697	3.937	3.369	3.722	3.759	3.373	3.846	3.687	3.441	3.737	4.132	3.46	3.56	3.62	3.758	3.532	3.523	3.534	3.29	3.654	3.596	3.798	2.804	2.958	2.679	2.604	2.732	3.017	2.756	2.721	2.875	2.674	2.707
ACP6	5.216	5.167	4.986	5.395	5.521	5.518	5.221	5.413	6.083	5.092	5.86	5.803	5.739	5.145	5.592	5.766	5.83	5.408	5.084	5.362	5.952	5.54	5.932	6.132	6.301	6.29	6.133	6.183	7.008	6.195	6.305	6.108	6.271	5.98	5.749	5.877	6.161	5.661	5.387	5.678	5.467	4.565	4.92	5.154	5.449	5.67	5.823	5.949	5.963
ACPL2	4.22975	4.27325	3.826	3.93075	4.1975	4.63775	4.242	4.11075	4.10075	4.03825	4.0955	4.5505	3.86225	4.6005	4.101	4.7665	4.2965	4.54475	4.148	4.63275	4.9515	4.955	4.94475	4.7765	5.01625	4.817	5.098	4.922	4.81975	4.844	4.75775	5.08675	5.258	5.10875	4.487	4.94525	4.93925	4.715	5.58175	4.4425	4.74625	4.47	4.72625	4.3915	5.14025	3.89775	4.52425	5.221	4.993
ACPP	5.642	6.0856	5.0036	4.7486	5.298	5.2726	5.0388	4.6	4.7508	5.2644	5.1338	5.2856	5.4386	5.164	5.3736	5.36	4.7434	5.318	5.4134	5.472	5.737	5.4118	5.3306	4.648	6.8084	6.1408	5.8078	4.9262	5.4652	6.5536	5.5104	5.6574	4.664	5.9526	5.3244	5.3004	6.6066	5.446	4.0622	5.3748	5.1456	5.3144	4.3446	5.3176	4.261	5.5584	4.158	4.6758	4.9972
ACPT	2.306	2.42	2.322	3.027	2.461	2.259	2.214	2.026	2.494	2.631	2.708	2.292	2.514	2.174	2.53	2.583	2.354	2.187	2.679	3.257	3.091	2.855	3.185	3.025	2.767	3.081	3.208	3.277	3.106	3.041	2.961	3.146	3.023	2.947	2.99	3.093	3.272	3.062	2.199	2.558	2.264	2.371	2.389	2.586	2.229	2.358	2.372	2.408	2.418
ACR /// LOC645529	2.818	2.476	2.34	2.783	2.347	2.566	2.375	2.498	2.506	3.068	2.534	2.208	2.469	2.459	2.373	2.238	2.378	2.689	2.571	3.284	3.107	2.957	3.043	3.152	3.444	3.295	3.162	3.351	2.993	3.1	3.07	3.289	2.923	3.057	2.908	3.094	3.222	3.382	2.461	2.642	2.608	2.397	2.478	2.676	2.597	2.527	2.629	2.415	2.42
ACRBP	8.403	8.068	8.154	8.962	7.966	7.715	8.499	8.147	8.435	9.062	8.13	8.04	8.71	8.47	8.733	9.169	8.295	8.576	8.589	8.958	8.529	8.699	8.819	8	8.115	8.962	7.961	8.452	8.893	8.801	8.311	8.651	8.26	8.243	8.454	7.811	8.45	8.233	7.641	9.01	6.806	7.985	8.563	7.453	9.405	8.846	8.066	6.876	6.493
ACRC	3.012	3.369	2.742	2.768	3.302	3.483	3.39	3.243	3.247	2.611	3.039	3.05	3.121	3.342	2.793	3.394	2.824	3.088	3.106	3.614	3.495	3.326	3.312	3.347	3.351	3.614	3.867	3.594	3.478	3.494	3.497	3.3	3.337	3.387	3.309	3.35	3.478	3.269	3.093	2.946	2.977	2.617	2.601	2.886	2.151	2.717	2.908	3.079	2.624
ACRV1	2.66	2.283	2.09	2.145	2.146	2.391	2.178	2.077	2.425	2.25	2.142	2.165	2.639	2.003	2.055	1.982	1.846	1.894	2.151	2.625	2.705	2.775	2.682	2.739	2.602	2.674	2.677	2.815	2.579	2.538	2.645	2.901	2.816	2.644	2.629	2.765	2.731	2.794	2.435	2.202	2.088	2.239	2.21	2.253	2.322	2.088	2.245	2.22	2.083
ACSBG1	2.7545	2.745	2.82	3.0405	2.7755	2.8365	2.7135	2.664	2.7285	3.0035	2.6345	2.734	2.8365	2.6425	2.8355	3.2065	2.8125	2.8085	2.8145	3.164	2.9035	3.225	3.334	3.198	3.1735	3.409	2.9855	3.189	3.016	3.203	3.0125	3.32	3.0535	3.153	3.165	2.951	3.029	3.0075	2.41	2.7235	2.4285	2.59	2.7075	2.4495	2.6725	2.8115	2.4825	2.4505	2.604
ACSBG2	2.78	2.537	2.212	2.489	2.563	2.468	2.775	2.534	2.423	2.471	2.666	2.768	2.491	2.565	2.635	2.67	2.51	2.558	2.608	3.49	3.123	3.577	3.324	3.313	3.113	3.142	3.384	3.42	3.365	3.014	3.473	3.157	3.435	3.278	3.324	3.379	3.172	3.345	2.532	2.745	2.815	2.862	3.177	2.778	2.988	2.464	2.642	2.756	2.79
ACSF2	4.165	4.364	4.972	4.054	4.258	4.441	5.2	4.823	4.859	4.503	4.371	4.417	5.562	4.095	4.95	3.948	5.162	4.507	4.36	6.172	5.563	5.739	5.542	5.87	5.293	5.249	5.505	5.302	5.843	5.737	5.931	5.363	5.685	5.396	5.319	5.319	4.696	6.089	4.582	4.553	4.413	4.446	4.181	4.134	4.896	4.242	3.934	3.897	3.955
ACSF3	4.139	3.768	4.2935	3.5135	3.8885	3.8985	3.6325	3.823	3.965	3.889	3.889	3.847	3.9915	3.683	3.7955	3.8295	3.8275	3.687	3.794	4.466	4.6635	4.6875	4.486	4.682	4.424	4.972	4.7235	4.632	4.6345	4.715	4.56	4.4565	4.567	4.749	4.8445	4.82	4.465	4.3255	3.486	3.443	3.3765	3.328	3.3255	3.5945	3.6475	3.6315	3.375	3.241	3.29
ACSL1	9.792	9.707	9.2995	9.7065	9.451	9.757	9.7275	9.157	9.7745	9.022	9.818	8.9865	9.1225	9.9735	8.73	9.666	8.6345	9.5135	9.385	10.002	9.8405	9.7265	10.4485	9.14	10.589	9.466	10.2875	9.863	9.742	10.5265	10.2495	10.184	9.108	10.0435	9.7775	10.1945	10.503	10.5755	9.1865	9.686	10.0205	8.871	9.558	9.5855	8.949	9.7745	9.8255	9.983	9.7545
ACSL3	6.5275	6.897	6.762	6.735	7.243	7.9965	6.7775	6.845	6.63	6.596	7.185	6.9505	6.509	7.266	6.3365	6.8635	6.6925	6.7655	6.714	7.776	7.799	7.781	7.925	7.7625	7.993	7.7675	7.916	7.6325	7.111	7.752	7.835	7.964	7.802	7.8795	7.754	7.6035	7.8215	7.988	7.5775	7.28	7.585	7.518	7.4295	7.167	7.3685	6.87	7.3105	7.753	7.629
ACSL4	7.048	7.5415	7.1755	6.5315	7.272	6.7505	7.3255	7.381	6.987	6.887	7.205	7.153	7.069	7.4775	6.93	7.46	7.214	7.3345	6.7975	7.3865	7.698	7.8385	7.8745	7.496	8.251	7.606	7.8235	7.669	7.682	8.0655	7.8235	7.7305	7.523	7.659	7.333	7.4575	7.5875	8.1205	7.6445	7.7175	7.98	7.3065	7.693	7.509	7.533	7.1	7.2	7.4135	7.5575
ACSL5	5.892	6.20633	6.08933	6.33467	6.06667	5.60333	6.10667	6.11467	6.05867	6.357	6.05133	6.18333	6.15767	5.97533	5.98667	5.77167	6.23333	5.80967	6.19967	6.59433	6.46267	6.731	6.822	6.68833	6.237	6.59033	6.68567	6.54267	6.43367	6.477	6.69833	6.375	6.84833	6.40333	6.743	6.417	6.274	6.33733	5.83367	5.826	5.95933	5.89133	5.72567	6.06667	5.86833	6.00067	6.04667	5.927	5.712
ACSL6	3.8806	3.7498	4.7852	4.216	3.6136	4.2492	4.1082	4.1212	4.061	5.1114	4.3782	4.2604	4.1052	4.3748	4.5448	4.5196	4.42	4.6028	4.0388	5.3384	4.4362	5.3728	4.3006	4.881	4.9744	4.6596	4.7188	4.9722	4.5842	4.7304	4.4694	5.6046	4.9252	5.0212	4.4648	4.7056	4.2846	4.46	4.6528	4.206	4.6318	4.4058	4.513	4.1508	4.636	4.0744	4.7154	4.7536	4.5894
ACSM1	2.596	3.641	2.852	3.306	2.83	2.923	2.558	3.045	3.028	2.724	3.054	2.818	2.86	3.083	3.229	3.139	2.959	2.719	3.011	3.399	2.895	3.198	3.224	3.703	3.167	3.041	3.26	3.074	2.932	2.959	2.937	3.354	3.208	3.347	3.547	3.454	3.227	3.313	2.818	2.482	2.751	2.544	2.814	2.489	2.764	3.053	2.845	3.007	2.696
ACSM2A	2.342	2.22567	2.229	2.27367	2.28567	2.06133	2.271	2.219	2.17967	2.271	2.22933	2.31067	2.154	2.00567	2.37133	2.20033	2.28733	2.15	2.193	3.02933	2.83733	2.841	2.87567	2.86933	2.867	2.929	2.88333	3.05367	2.877	2.98967	2.92867	2.94633	2.81867	2.99533	2.88167	3.03233	3.10467	2.874	2.27867	2.26	2.23567	2.25833	2.375	2.38467	2.35633	2.447	2.254	2.21533	2.43267
ACSM2A /// ACSM2B /// LOC100291873	1.9175	1.8795	1.758	1.86825	1.84875	2.002	1.86375	1.86475	1.9755	1.87775	1.7955	1.86775	1.89425	1.81975	1.77825	1.95175	1.7775	1.827	1.92325	2.61875	2.555	2.533	2.586	2.4425	2.648	2.50925	2.57325	2.632	2.568	2.65025	2.63375	2.5925	2.53575	2.51225	2.52975	2.555	2.56525	2.63175	2.20275	2.17425	2.2065	2.23675	2.168	2.23325	2.20475	2.07875	2.2985	2.1655	2.212
ACSM2B /// LOC100291873	2.182	2.116	1.965	2.185	1.875	2.301	2.285	2.114	2.402	1.993	2.268	2.117	2.442	1.982	2.092	2.085	2.081	2.102	2.131	2.836	2.762	2.892	2.906	2.707	2.952	2.875	2.845	2.676	2.924	2.692	2.874	2.989	2.688	2.749	2.723	2.754	2.937	3.135	2.583	2.415	2.507	2.521	2.452	2.614	2.46	2.546	2.275	2.591	2.689
ACSM3	4.8745	4.3775	4.789	4.5805	4.866	4.7855	5.614	5.227	5.1295	4.6695	4.9245	5.228	4.9505	5.448	5.1185	4.8575	4.9515	5.267	4.7205	4.4845	4.753	4.729	4.289	4.5495	4.1525	4.4465	4.4925	4.788	4.5835	4.432	4.306	4.846	4.182	4.6585	4.45	4.5105	4.2495	4.9595	4.886	4.2745	4.2245	4.048	4.268	4.214	4.825	3.755	4.202	4.3325	4.791
ACSM4	2.011	1.932	1.975	1.984	1.825	2.064	1.932	2.069	2.04	1.944	1.939	1.822	2.075	2.058	2.039	1.79	1.766	1.743	1.813	2.692	2.78	2.511	2.618	2.694	2.702	2.749	2.543	2.987	2.882	2.701	2.746	2.824	2.477	2.603	2.634	2.666	2.613	3.24	2.154	2.323	2.053	2.169	2.217	2.246	2.138	2.02	2.034	2.169	2.113
ACSM5	3.298	3.422	3.386	3.9525	3.2855	3.63	3.545	3.5595	3.668	3.2735	3.313	3.4005	3.415	3.657	3.573	3.3185	3.347	3.217	3.595	3.5485	3.542	3.366	3.6095	3.5645	3.4235	3.5395	3.791	3.532	3.5555	3.756	3.597	3.5575	3.508	3.5195	3.5895	3.4495	3.4775	3.8555	2.6955	2.835	2.838	2.828	3.0975	2.923	2.8025	2.8605	3.069	2.632	2.6615
ACSS1	7.20433	7.126	6.862	7.28267	7.028	6.99467	7.24667	7.161	7.12067	7.24867	6.62467	7.14933	7.262	6.78367	7.16267	6.941	7.01367	6.681	6.763	7.19933	7.40433	7.22433	7.278	7.55467	7.11633	7.32433	7.495	7.14367	7.47167	7.11433	7.30133	6.823	7.516	7.24833	7.27867	7.42867	7.13233	7.26467	5.75233	6.54867	6.285	6.63733	6.11567	6.60667	6.11133	6.73967	6.29533	5.832	6.008
ACSS2	6.29	6.5095	6.464	6.046	6.242	6.456	6.201	6.123	6.36	6.146	6.274	6.055	6.556	6.334	6.3585	6.4305	5.9675	6.0915	6.082	6.7165	6.5985	6.4375	6.837	6.326	7.1475	6.7685	6.7205	6.749	7.067	6.8655	7.178	6.62	6.451	6.692	6.8095	6.873	6.718	6.366	5.276	6.037	5.845	5.6145	5.767	5.728	5.461	6.5305	5.3815	5.4085	5.5525
ACSS3	1.938	2.14333	1.98733	2.329	2.021	2.34267	2.054	2.03367	2.04967	2.01533	2.146	2.131	2.00767	2.38567	2.016	1.982	2.022	2.234	2.111	2.85	2.836	2.76233	2.81533	2.701	2.662	2.76267	2.754	2.805	2.71467	2.736	2.78633	2.78333	2.71367	2.863	2.8	2.69933	2.887	2.99067	2.472	2.452	2.33967	2.404	2.37467	2.50467	2.44833	2.34367	2.375	2.49067	2.45133
ACTA1	2.44933	2.404	2.52133	2.535	2.554	2.192	2.28633	2.26667	2.576	2.54867	2.501	2.22667	2.47933	2.37867	2.30633	2.438	2.45067	2.36567	2.62033	2.712	2.70133	2.67367	2.754	2.684	2.78367	2.71833	2.74733	2.66867	2.868	2.92	2.851	2.671	2.803	2.594	2.829	2.74767	2.83833	2.81033	2.219	2.408	2.31867	2.22533	2.35867	2.27867	2.31733	2.37067	2.40033	2.11633	2.03267
ACTA2	3.258	3.548	3.71233	2.97967	3.16	2.74867	3.584	3.295	3.45233	3.47533	3.52133	3.41567	3.627	3.27	3.43733	3.30033	3.09767	3.05233	3.47367	3.88833	4.24933	4.692	4.358	4.11	4.47433	4.45067	4.10333	4.11233	3.66367	4.33133	4.014	4.30367	4.55167	4.291	4.34733	4.445	4.546	4.20433	3.668	3.64333	3.03533	3.442	2.976	3.29933	3.15333	3.352	3.15633	3.432	3.26067
ACTB	12.0863	12.0108	11.807	12.0938	11.9795	11.5592	11.868	11.7858	12.0383	11.9043	11.879	11.8753	11.9213	11.8395	11.9468	11.8757	11.8463	11.7788	11.9265	11.2383	11.2238	11.1488	11.4838	11.2925	11.6752	11.3068	11.272	11.295	11.5172	11.539	11.4398	11.0972	11.1623	11.2048	11.45	11.4153	11.5863	11.5577	10.2282	11.2362	10.786	11.346	10.6617	11.1808	10.3382	11.3197	10.583	10.2653	10.549
ACTBL2	2.097	2.321	2.167	2.1875	2.075	2.436	2.2115	2.1675	2.1865	2.175	2.165	1.971	2.198	2.202	2.24	2.1085	2.238	2.2605	2.2715	2.7235	2.734	2.8025	2.801	2.7695	2.7875	2.672	2.925	2.908	2.823	2.753	2.808	2.813	2.8735	2.7865	2.732	2.7475	2.8595	2.823	2.503	2.343	2.405	2.332	2.266	2.371	2.3915	2.2065	2.2225	2.564	2.2765
ACTC1	2.4335	2.4715	2.2455	2.402	2.2975	2.3925	2.1625	2.264	2.4285	2.342	2.346	2.137	2.2535	2.3865	2.1845	2.2635	2.1725	2.464	2.5085	3.0195	2.9645	3.051	3.2275	2.9135	3.0795	2.925	2.9125	3.1645	2.959	3.0575	2.979	3.1185	3.0045	3.1135	2.9345	2.882	3.063	3.3	2.362	2.284	2.326	2.331	2.3175	2.3875	2.3835	2.3425	2.1645	2.534	2.4205
ACTG1	11.0206	10.941	10.8604	11.1006	10.9626	10.5242	10.8604	10.8706	11.0528	10.8178	10.913	10.9106	10.9646	10.8154	11.029	10.8804	11.0258	10.8228	10.902	10.7508	10.8752	10.7178	10.8332	10.9782	10.974	10.9514	10.6236	10.8292	11.1026	10.9572	10.867	10.6208	10.956	10.756	10.8568	10.9298	10.8364	10.855	10.3148	10.4882	10.265	10.6108	10.253	10.4878	10.016	10.5894	10.1492	9.944	10.1856
ACTG2	2.0926	2.0516	2.0024	1.9078	2.106	2.0656	2.0884	1.997	2.0142	2.0838	2.038	2.0012	1.9784	1.9662	2.15	2.1026	2.0048	1.997	2.0694	3.0926	2.7746	2.7458	2.7076	2.6998	2.8098	2.7904	2.777	3.0416	2.8832	2.7994	2.6904	2.8346	2.7108	2.6942	2.8656	2.758	2.7568	2.8014	2.3926	2.2382	2.246	2.3028	2.2484	2.2878	2.284	2.2276	2.2114	2.2474	2.3268
ACTL6A	7.184	6.975	7.399	7.053	7.079	5.548	7.305	7.557	7.228	7.263	7.332	7.494	7.114	7.331	7.283	7.14	7.569	7.208	7.314	7.328	7.375	7.584	7.184	7.688	6.878	7.359	7.177	7.604	7.379	7.243	7.295	7.69	7.392	7.616	7.423	7.377	7.036	7.052	7.646	7.292	7.256	7.131	7.351	7.304	7.679	6.942	7.557	7.646	7.572
ACTL6B	1.973	1.957	1.877	2.149	2.101	1.877	2.171	1.963	1.972	1.874	1.798	2.065	1.757	2.05	2.195	1.95	1.891	2.115	2.068	2.977	2.705	2.867	2.855	2.781	2.83	2.693	2.751	3.012	2.795	2.801	2.89	2.836	2.855	2.751	2.924	2.716	2.827	3.001	2.32	2.35	2.427	2.21	2.181	2.271	2.119	2.372	2.581	2.364	2.265
ACTL7A	2.195	1.955	1.862	2.069	2.128	2.021	1.918	1.857	1.868	1.972	2.023	2.084	1.924	1.823	1.96	2.234	2.247	1.845	2.075	3.25	2.767	2.853	2.793	2.634	2.889	2.771	2.768	2.969	2.977	2.879	2.705	2.856	2.978	2.849	2.754	2.898	2.988	2.929	2.502	2.267	2.296	2.295	2.228	2.341	2.25	2.125	2.38	2.316	2.394
ACTL7B	2.67	2.88	2.763	2.82	2.547	2.704	2.754	2.858	2.868	3.129	3.005	2.777	2.885	2.642	3.071	2.992	2.901	2.65	2.923	3.378	3.25	3.356	3.418	3.216	3.089	3.296	3.293	3.246	3.384	3.464	3.212	3.251	3.237	3.274	3.553	3.245	3.448	3.373	2.532	2.809	2.536	2.687	2.606	2.561	2.982	2.36	2.676	2.91	2.528
ACTL8	2.918	2.785	2.482	3.14	2.67	3.201	2.732	2.596	3.136	2.815	2.575	2.48	2.853	2.905	2.721	2.184	2.628	2.605	2.651	2.941	3.099	2.962	3.021	3.089	2.969	2.893	3.112	2.989	2.881	3.093	3.109	3.225	3.215	3.033	3.204	3.16	3.349	3.104	2.325	2.394	2.61	2.505	2.355	2.571	2.407	2.639	2.521	2.569	2.338
ACTL9	2.604	2.27	2.421	2.446	2.249	2.315	2.23	2.245	2.317	2.372	2.259	2.271	2.361	2.214	2.071	2.159	2.143	2.405	1.995	2.615	2.55	2.465	2.439	2.534	2.588	2.86	2.525	2.346	2.672	2.846	2.523	2.455	2.446	2.609	2.598	2.81	2.544	2.589	2.321	2.268	2.12	2.263	2.601	2.326	2.151	2.477	2.33	2.155	2.559
ACTN1	7.06357	7.07871	6.48214	7.02643	6.85071	6.38586	6.65914	6.31886	7.28414	6.63643	7.166	6.58543	6.89271	6.866	6.893	7.144	6.18814	6.62829	6.82614	6.76686	6.61171	6.25271	7.11271	6.27286	7.395	6.66657	6.77357	6.58114	6.82129	7.121	6.95714	6.539	6.31757	6.54957	6.65129	6.96543	7.18986	6.79971	5.47914	6.25557	5.82986	6.056	5.81986	5.87029	5.56829	6.38429	5.64257	5.40914	5.59543
ACTN2	2.41083	2.17283	2.17567	2.85583	2.17967	2.4885	2.28483	2.11533	2.37683	2.3175	2.31933	2.275	2.3115	2.2875	2.14383	2.212	2.15983	2.27483	2.2545	2.828	2.87917	2.7885	2.89117	2.92733	2.85117	3.27083	2.79267	2.92	2.76533	2.70517	2.8165	2.95233	2.8045	2.891	2.74467	2.827	2.89017	3.04117	2.3425	2.38167	2.41917	2.42317	2.46467	2.4725	2.5235	2.41683	2.48867	2.47683	2.51
ACTN3	2.8	2.993	3.174	3.052	2.983	2.967	3.268	2.914	3.099	2.925	3.151	3.022	3.104	2.828	3.001	3.016	2.931	3.026	3.338	3.377	3.304	3.034	3.199	3.21	3.123	3.122	3.151	3.122	3.115	3.252	3.27	2.943	3.249	2.925	3.137	3.067	3.255	3.207	2.438	2.445	2.535	2.483	2.625	2.345	2.586	2.559	2.646	2.52	2.5
ACTN4	6.2666	6.409	6.19	6.4136	6.241	6.4456	6.12	6.0072	6.4698	6.0828	6.3126	6.0408	6.4408	6.1078	6.2056	6.1798	5.8214	5.855	6.2912	6.9044	6.7578	6.5728	6.8578	6.6494	6.9378	6.7902	6.8296	6.7102	7.0004	6.9438	6.9004	6.3948	6.737	6.5438	6.9006	6.7782	6.9602	6.6248	5.5978	6.0712	5.4048	5.9202	5.3728	5.8468	5.4434	6.289	5.3408	4.9954	5.1292
ACTR10	7.6765	7.7455	7.7885	7.718	7.7395	7.9715	7.7775	7.7855	7.9025	7.8145	7.88	7.7845	7.7125	7.9055	7.7165	7.702	7.893	7.927	8.094	8.745	8.6895	8.771	8.6715	8.5035	8.591	8.235	8.4785	8.63	8.2635	8.4095	8.511	8.758	8.492	8.503	8.37	8.435	8.8405	8.6765	8.7095	8.377	8.3545	7.9965	8.4055	8.1825	8.5275	8.0695	8.6565	8.505	8.4415
ACTR1A	7.4708	7.6836	7.4526	7.407	7.3694	7.4312	7.3564	7.1742	7.5522	7.611	7.5898	7.2802	7.71	7.298	7.5784	7.313	7.2164	7.2476	7.6556	7.8686	7.6144	7.6022	7.9666	7.7162	7.6728	7.6034	7.784	7.405	7.9432	7.983	7.7748	7.535	6.9672	7.4386	7.5632	7.8258	7.6776	7.5288	7.4448	7.4428	7.0886	7.0258	7.1116	7.499	7.055	7.7556	7.0438	6.4922	6.684
ACTR1B	6.6795	6.5165	6.6365	6.6665	6.3985	6.9275	6.5235	6.5205	6.8235	6.525	6.6455	6.5375	6.5845	6.5525	6.4735	6.336	6.7665	6.353	6.5355	7.04	7.2835	7.0255	6.888	7.2755	6.7235	6.98	7.025	6.7455	7.372	6.88	7.038	6.4295	6.7135	7.0365	7.244	7.103	7.0915	6.8035	6.6575	6.2375	6.1705	6.384	6.259	6.272	7.066	6.3145	7.519	6.1525	6.383
ACTR2	8.64389	8.59644	8.39689	8.52789	8.66867	8.50644	8.53856	8.30067	8.41822	8.34956	8.51	8.44789	8.56089	8.46311	8.50378	8.58089	8.19189	8.52422	8.41156	8.87744	8.99667	8.93	9.10967	8.80511	9.37778	9.04011	9.03733	8.85544	9.02767	9.128	9.09522	8.73333	8.93622	8.914	8.99756	9.08267	8.94478	9.01267	8.43067	8.54678	8.48189	8.75256	8.415	8.51444	8.37056	8.69167	8.07156	8.12667	8.25644
ACTR2 /// LOC284441	9.355	9.1345	8.986	9.556	9.28	9.3405	9.2295	8.444	9.2435	9.0805	9.174	8.9585	9.721	8.806	9.007	9.3535	8.4115	9.2885	9.02	8.9	9.3435	9.159	9.7975	8.959	10.081	9.481	9.5305	9.0515	9.6855	9.7895	9.7645	9.1435	9.2875	9.25	9.5245	9.6905	9.312	9.421	8.802	9.2715	9.008	9.447	8.9895	8.855	9.151	9.386	7.832	8.2905	8.336
ACTR3	10.6955	10.763	10.556	10.4375	10.663	10.1385	10.635	10.6845	10.314	10.6355	10.6565	10.7395	10.502	10.709	10.6815	10.779	10.5485	10.7145	10.6655	10.816	10.708	10.8195	10.9415	10.7695	11.135	10.835	10.8815	10.9605	10.762	10.91	10.8815	10.774	10.7265	10.882	10.7835	10.886	10.9065	10.904	10.196	10.6965	10.6315	10.6755	10.443	10.681	10.3355	10.6095	10.5235	10.48	10.5
ACTR3B /// LOC100290215	4.639	4.57	4.329	4.103	4.59	4.861	4.082	4.763	4.696	5.306	4.495	4.598	4.646	5.069	5.004	5.011	4.387	4.453	5.021	4.584	4.547	4.7	4.862	4.456	4.433	4.262	4.51	5.313	4.531	4.478	5.095	4.354	4.457	4.125	4.934	4.611	4.366	4.246	3.757	3.905	3.794	3.359	4.055	3.631	3.349	3.854	3.572	3.607	3.426
ACTR3C	3.349	2.769	2.374	3.219	2.717	3.139	2.817	2.674	2.743	2.548	2.887	2.79	3.27	2.35	2.421	2.329	2.676	2.841	2.775	3.533	3.447	3.102	3.273	3.59	3.722	3.971	3.371	3.859	3.658	3.44	3.447	3.354	3.677	3.561	3.493	3.181	3.691	2.947	2.961	3.23	2.911	3.517	3.65	2.886	2.638	3.016	3.542	2.869	2.817
ACTR5	6.16	6.128	6.248	6.119	6.24	6.897	5.909	6.672	6.408	6.555	6.201	6.731	6.527	6.19	6.565	6.256	6.416	6.266	6.802	6.545	6.805	6.839	7.067	7.334	6.36	7.07	7.019	7.094	7.32	6.831	7.224	6.926	7.262	7.187	6.862	7.134	6.837	6.529	6.108	6.136	5.969	6.035	5.962	6.317	6.393	5.99	6.439	6.637	6.38
ACTR6	4.665	4.591	5.257	4.701	4.729	4.595	5.152	5.373	4.742	4.63067	5.116	5.25467	4.536	4.911	4.55867	4.853	5.34167	4.89667	4.851	5.386	5.88933	6	5.242	5.882	5.04733	5.761	5.34767	5.83167	5.04367	5.27733	5.34033	6.32167	5.72533	5.79233	5.07933	5.48933	5.19333	5.70167	6.50267	5.285	6.209	5.33	6.02	5.32033	5.99867	4.34667	5.968	6.61833	6.40233
ACTR8	5.316	5.736	5.6425	4.907	5.3795	5.451	5.5165	5.721	5.462	5.5275	5.408	5.7395	5.433	5.599	5.5025	4.977	5.7245	5.0185	5.811	5.9655	5.992	5.7115	6.005	6.2545	5.697	5.9175	5.666	5.8355	5.7515	5.43	6.038	5.5675	5.7135	5.978	6.0325	5.8335	5.508	6.049	5.5275	5.2875	5.387	5.2965	5.511	5.2755	5.215	5.206	5.0575	5.315	5.445
ACTRT1	2.381	2.704	2.526	2.372	2.496	2.842	2.581	2.411	2.22	2.447	2.537	2.394	2.513	2.589	2.322	2.522	2.365	2.656	2.471	2.904	3.196	2.883	2.995	3.188	3.38	2.915	3.089	2.817	3.09	3.298	2.922	3.097	2.835	3.094	3.04	3.05	2.919	3.055	2.203	2.45	2.58	2.708	2.458	2.537	2.821	2.437	2.749	2.92	2.403
ACTRT2	1.72	2.591	2.454	2.102	2.406	2.54	2.292	2.159	2.374	2.201	2.607	2.048	2.118	2.41	2.295	2.242	2.084	2.277	2.481	2.85	2.904	2.982	2.857	2.958	2.832	2.843	2.985	2.751	3	2.822	2.827	2.955	2.863	2.768	2.888	2.872	2.944	2.765	2.249	2.347	2.291	2.255	2.175	2.34	2.184	2.445	2.497	2.407	2.367
ACVR1	5.39525	5.002	5.35425	5.2735	5.40525	5.5385	5.4145	5.33125	5.15975	5.55525	5.12225	5.3985	5.026	5.55825	5.5705	5.56775	5.608	5.40425	5.27575	5.22	5.30125	5.65725	5.48	5.47575	5.538	5.71475	5.42875	5.81975	5.585	5.62825	5.5045	5.41525	5.37225	5.534	5.43825	5.6385	5.45525	5.20125	5.5085	4.83175	4.85775	5.21075	4.86175	4.84525	5.0245	4.8805	4.56375	5.00725	5.00475
ACVR1B	4.2746	4.7358	4.4398	4.25	4.6478	3.8446	4.432	4.465	4.425	4.4458	4.307	4.3402	4.4622	4.4144	4.3468	4.4954	4.3888	4.271	4.5616	4.9008	4.7028	4.7358	4.9172	4.5964	5.2612	4.7306	4.9388	4.8136	5.0916	4.8526	4.9984	4.7074	4.7048	4.6732	4.88	4.8562	4.8258	4.7212	3.7516	4.314	4.1276	4.3702	4.0096	4.3548	4.039	4.6682	4.017	4.0734	4.3004
ACVR1C	3.852	3.08367	3.423	3.591	3.26933	3.68	3.69733	3.39667	3.41667	3.244	3.397	3.869	3.24733	3.778	3.57233	3.665	3.63133	3.96533	3.732	4.11667	3.81033	3.983	3.80733	3.89667	3.891	4.066	3.866	4.083	3.80633	3.57233	3.78833	4.33033	3.501	4.62367	3.814	4.18767	3.975	3.82967	4.54567	3.03833	3.943	3.64767	3.55533	3.64933	4.21767	3.08533	3.903	4.678	4.261
ACVR2A	5.72133	6.48733	6.42367	6.17667	6.64033	6.35267	6.32867	6.512	5.994	5.99467	6.29733	6.49567	6.239	6.221	6.32867	5.91433	6.652	7.02833	5.90467	7.14933	7.12967	7.45933	6.73333	7.07933	6.91767	6.97467	6.635	7.062	6.82333	6.58333	6.63467	6.92667	7.58067	7.17633	7.13733	6.94167	6.26233	6.74567	6.56067	6.149	6.40533	6.70367	6.02867	6.786	6.38533	6.15767	6.64067	6.78133	6.38833
ACVR2B	4.2175	3.6745	3.607	3.6705	3.9665	3.8735	3.977	4.129	3.8865	3.4095	4.2025	4.0405	3.733	4.1135	3.6685	4.3625	4.2465	3.707	4.275	4.585	4.226	4.1845	3.945	4.015	4.188	4.793	4.291	4.467	4.413	4.304	4.441	4.7565	4.288	4.26	4.64	4.4145	4.03	4.1105	4.3405	3.6725	3.7685	3.65	3.9425	3.637	4.5645	3.5015	4.0225	4.2975	4.1975
ACVRL1	2.503	2.4605	2.5765	2.5875	2.4575	2.6775	2.4745	2.8445	2.692	2.533	2.561	2.2885	2.4965	2.5825	2.445	2.5905	2.8115	2.549	2.627	3.227	3.3665	3.376	3.2325	3.4065	3.041	3.165	3.31	3.0695	3.384	3.4725	3.242	3.132	3.304	3.0665	3.371	3.2015	3.4845	3.3695	2.488	2.6295	2.6165	2.4975	2.45	2.6805	2.5845	2.59	2.3675	2.5175	2.3085
ACY1	3.50933	3.454	3.54033	3.412	3.35833	3.41833	3.21933	3.582	3.35233	3.74333	3.538	3.54133	3.65767	3.25633	3.61167	3.56033	3.51433	3.299	3.42567	4.492	4.282	4.072	4.108	4.28133	4.132	4.18967	4.183	4.01467	4.147	4.34767	4.16	4.12533	4.326	4.14367	4.425	4.23567	4.481	4.19733	3.47033	3.30833	3.19633	3.29533	3.386	3.37633	3.36233	3.377	3.24	3.21033	3.09133
ACY3	2.39867	2.48233	2.562	2.57	2.47067	2.52967	2.35867	2.36367	2.509	2.46233	2.55767	2.39833	2.699	2.46967	2.473	2.39733	2.38533	2.43033	2.59133	2.978	3.03667	2.87933	3.049	3.114	3.099	3.05767	3.15633	3.10033	3.14533	3.02067	3.07133	3.15367	3.10633	3.022	3.11333	3.15833	3.33967	3.062	2.60533	2.601	2.451	2.56933	2.493	2.44267	2.61833	2.586	2.53133	2.60867	2.44333
ACYP1	7.615	7.121	7.542	7.692	7.789	7.093	7.661	7.788	7.327	7.726	7.836	7.669	7.613	7.849	7.943	7.48	7.917	7.455	7.562	7.92	8.34	8.452	7.726	8.135	7.938	8.39	8.222	8.418	8.053	7.877	8.005	8.547	8.685	8.193	8.175	8.608	7.546	7.756	8.824	7.757	7.864	7.755	8.342	7.942	8.463	7.365	8.373	8.592	8.166
ACYP2	4.869	5.373	5.853	4.371	5.276	4.838	5.056	5.808	4.581	4.784	5.284	5.009	5.006	5.269	4.73	5.395	5.615	5.67	5.589	6.049	5.968	5.188	6.169	6.421	5.345	5.409	5.747	5.984	5.785	5.442	5.837	6.063	5.692	6.036	6.004	5.665	5.823	5.237	6.091	4.947	5.315	4.896	5.434	5.097	5.556	5.171	5.576	5.882	5.86
ADA	6.6225	6.6575	6.862	6.0165	6.4605	6.726	6.744	6.8105	6.712	6.5265	6.4565	6.663	6.8845	6.0625	6.857	6.094	6.7115	6.1555	6.8205	7.785	7.751	7.5555	7.753	8.233	6.6975	7.7005	7.463	7.498	8.251	7.1505	7.716	7.3045	8.086	7.4405	7.7445	7.344	7.2455	7.8	6.869	6.434	6.5035	6.6535	7.084	6.1715	7.2495	6.6075	6.661	7.044	6.5675
ADAD1	2.261	2.196	2.382	3.484	2.274	3.706	2.464	2.745	2.655	2.301	2.352	2.112	2.119	2.367	2.32	2.291	2.188	2.44	2.355	2.861	3.207	2.843	2.896	2.949	2.843	3.108	2.715	3.09	2.873	3.012	2.894	3.145	2.678	2.998	3.06	2.86	3.276	3.132	2.53	2.161	2.232	2.505	2.428	2.272	2.259	2.376	2.646	2.268	2.39
ADAD2	2.452	2.599	2.742	2.395	2.567	2.707	2.596	2.34	2.199	2.835	2.557	2.541	2.917	2.339	2.616	2.576	2.336	2.241	2.218	2.855	2.749	2.96	2.631	2.885	2.658	2.726	3.001	2.726	3.006	2.999	3.157	3.05	2.786	2.731	3.138	2.831	2.778	2.768	2.181	2.444	2.267	2.334	2.154	2.736	2.397	2.326	2.405	2.244	2.375
ADAL	3.278	3.1892	3.4622	3.1288	3.0532	2.9392	2.9866	3.1118	2.933	3.1474	3.0878	3.2588	3.1738	2.9546	3.0582	3.2388	3.8166	3.1316	3.0074	3.531	3.5914	3.6052	3.4886	3.6518	3.7772	3.6186	3.4626	3.7512	3.5702	3.514	3.3818	3.6492	3.669	3.4506	3.5786	3.6796	3.5248	3.3814	3.1934	3.1656	3.3208	3.161	3.3728	3.0032	3.2916	3.1256	3.235	3.1352	3.2904
ADAM10	6.1475	6.45875	6.27475	5.3635	6.655	6.32	6.47575	6.10525	5.66175	6.29775	6.42125	6.271	5.5985	6.326	5.828	6.39325	6.106	6.45325	6.3595	6.645	7.008	6.96525	7.06875	6.8175	7.3595	6.9425	6.846	6.90075	6.347	6.73825	6.92425	6.954	6.11225	6.93025	7.15025	6.7175	6.996	6.81975	6.5335	6.4545	6.817	6.687	6.665	6.511	6.98925	6.48575	6.4505	6.7365	6.737
ADAM11	2.76	2.76833	2.96033	2.786	2.829	2.687	2.64067	2.78533	2.79133	2.88367	2.92267	2.73	2.87533	2.80533	2.83867	2.91067	2.78467	2.649	2.88033	3.53	3.32533	3.38633	3.329	3.34267	3.39067	3.35867	3.358	3.43533	3.34967	3.33467	3.43667	3.39267	3.38467	3.35967	3.451	3.323	3.50433	3.363	2.46267	2.57433	2.47767	2.41533	2.53367	2.72967	2.49133	2.52467	2.44333	2.36667	2.46333
ADAM12	3.1214	2.777	2.8864	3.3422	2.9368	2.9734	2.8306	2.8916	2.7478	3.1976	2.8916	2.9568	2.6064	2.9494	2.9684	3.0458	2.6846	2.8788	2.8264	3.5942	3.4892	3.3902	3.5196	3.493	3.3792	3.6452	3.687	3.9168	4.029	3.7218	3.2642	3.6454	3.4816	3.5604	3.487	3.4238	3.4424	3.5124	2.9584	2.6646	2.8358	3.0866	2.9544	2.5592	2.9254	2.834	2.9856	2.857	2.797
ADAM15	4.0005	3.945	3.92083	3.8455	3.97583	4.18	3.61367	3.74567	4.16917	3.94933	3.80017	3.76317	4.2505	3.975	3.95317	3.708	3.94183	4.0125	4.02267	4.7355	4.29967	4.52767	4.32533	4.265	4.43067	4.36383	4.44267	4.04417	4.33117	4.43417	4.58883	4.18067	4.24983	4.2995	4.3465	4.2765	4.22133	4.1775	2.98367	3.40283	3.1755	3.238	3.23833	3.136	3.10467	3.73983	3.06017	2.83583	2.91
ADAM17	5.5375	5.4715	4.8255	5.279	5.4265	5.174	5.3035	5.106	5.29025	5.14875	4.95725	5.30975	4.955	5.244	5.16425	5.28625	5.0945	5.3245	5.248	5.62825	5.72125	5.74625	5.78375	5.411	5.95825	5.7355	5.988	5.43325	5.65925	5.79	5.63275	5.221	5.791	5.64725	5.402	5.809	5.5975	5.61175	4.78775	5.00025	5.17525	5.20125	5.136	5.13675	4.66225	5.2635	4.82725	4.85825	5.00625
ADAM18	2.51333	2.32767	2.34567	3.12633	2.368	2.89067	2.41333	2.45167	2.73867	2.25967	2.317	2.18333	2.291	2.48633	2.41533	2.348	2.204	2.48167	2.338	2.93933	3.08133	3.15867	3.05167	3.04567	3.06233	3.20533	3.08767	3.188	2.86867	3.08333	2.929	3.227	3.16033	3.039	3.09867	3.04467	3.09067	3.29533	2.699	2.69367	2.43767	2.422	2.46367	2.44267	2.56533	2.424	2.623	2.761	2.73333
ADAM19	4.79375	4.77075	4.51275	4.8465	4.568	4.8675	4.75075	4.67525	4.787	4.627	5.004	4.62225	4.66475	4.6905	4.50375	4.75875	4.63625	4.6325	4.6915	5.446	5.3445	5.059	5.377	5.28325	5.4325	5.44425	5.25175	5.38425	5.474	5.422	5.43	5.42125	5.27925	5.39625	5.459	5.31125	5.51175	5.357	4.469	4.88325	4.61	4.58775	4.597	4.80025	4.70825	4.68275	4.63775	4.6425	4.63175
ADAM2	1.865	1.914	1.791	2.724	1.644	2.058	1.939	1.755	1.753	1.818	1.6	1.675	1.933	1.956	1.724	1.744	1.723	1.673	1.815	2.695	2.664	2.645	2.666	2.581	2.69	2.628	2.629	2.618	2.484	2.641	2.722	2.835	2.789	2.558	2.686	2.554	2.697	2.979	2.218	2.007	2.201	2.026	2.211	2.089	2.23	2.079	2.403	2.425	2.304
ADAM20	3.825	3.56	3.733	3.384	3.11	3.112	2.818	3.433	3.36	4.262	3.768	3.387	3.381	3.159	3.177	3.619	3.182	3.109	3.264	3.857	3.845	3.756	4.39	3.699	3.802	4.152	3.743	3.88	3.823	3.812	4.416	3.918	4.127	4.091	4.021	4.014	4.138	3.919	2.834	3.222	3.353	3.635	3.067	3.631	3.193	3.74	3.294	3.973	3.396
ADAM21	2.991	2.496	2.594	3.58	2.656	2.918	2.684	2.663	2.532	2.692	2.36	2.587	2.613	2.742	2.401	2.435	2.479	2.722	2.258	3.271	3.169	3.17	3.193	3.433	3.248	3.485	3.678	3.201	3.304	3.236	3.171	3.635	3.365	3.534	3.265	3.509	3.21	3.413	2.664	2.811	2.7	2.598	2.69	2.559	2.837	2.673	2.635	2.761	2.647
ADAM21 /// ADAM21P1	2.455	2.307	2.503	2.403	2.156	2.357	2.337	2.291	2.593	2.361	2.424	2.319	2.182	2.346	2.649	2.232	2.185	2.235	2.05	2.718	2.613	2.809	2.726	2.701	2.556	2.699	2.622	2.762	2.555	2.548	2.814	2.555	2.595	2.668	2.858	2.82	2.714	2.699	2.017	2.277	2.189	2.177	2.144	2.177	2.275	2.253	2.587	2.094	2.102
ADAM22	2.40225	2.31125	2.36475	2.80375	2.33475	2.44825	2.4415	2.2025	2.349	2.175	2.192	2.3765	2.1925	2.2495	2.309	2.50275	2.304	2.42575	2.2205	2.909	2.9215	3.14875	3.01975	2.98825	2.8715	3.00475	3.0595	3.02925	3.00525	3.02025	3.04	3.05425	3.073	2.97725	3.04125	2.884	2.91425	2.94525	2.49725	2.64875	2.54625	2.6725	2.43625	2.47725	2.6335	2.422	2.45175	2.717	2.6165
ADAM23	3.568	3.317	3.326	3.68	3.449	3.477	3.115	3.174	3.364	3.347	3.485	3.645	3.238	3.223	3.4	3.079	3.093	3.182	3.551	3.314	3.234	3.493	3.326	3.272	3.255	3.374	3.326	3.526	3.39	4.011	3.308	3.285	3.305	3.435	3.53	3.291	3.295	3.496	2.601	2.691	2.735	2.959	2.87	2.999	2.8	3.06	2.77	2.765	2.784
ADAM28	7.0395	6.594	6.676	6.421	6.51475	7.51275	6.546	7.056	6.145	7.0835	6.82975	7.212	7.1515	6.35825	7.17075	7.053	6.93925	6.921	6.6865	6.52575	7.28775	6.704	6.648	7.149	7.6805	7.18925	7.25625	7.66075	7.171	7.3255	7.342	7.28375	7.60125	8.00925	7.03275	7.12425	7.814	7.40525	5.236	7.0505	6.5495	6.9565	6.40525	7.298	6.12875	6.52	6.74725	5.95975	6.92
ADAM29	1.852	2.455	1.988	2.34	2.219	2.577	2.129	1.935	2.376	2.678	2	1.904	2.119	1.976	2.395	2.193	1.956	2.245	1.957	2.612	2.652	2.635	2.655	2.666	2.632	2.642	2.567	2.795	2.652	2.698	2.529	2.675	2.65	2.546	2.797	2.537	2.902	2.839	2.489	2.228	2.012	2.36	2.408	2.293	2.16	2.084	2.667	2.497	2.139
ADAM30	2.827	2.924	2.831	4.399	2.751	3.361	2.592	2.757	3.623	2.948	2.75	2.744	2.766	3.111	2.727	2.636	2.62	2.643	2.896	3.33	3.395	3.26	3.114	3.277	3.117	3.087	3.385	3.345	3.351	3.173	3.543	3.426	3.113	3.347	3.034	3.432	3.51	3.411	2.939	2.838	2.661	2.752	2.803	2.968	2.842	2.768	2.795	2.784	2.821
ADAM32	3.013	2.634	2.59	3.539	2.349	3.055	2.837	2.544	2.824	2.623	2.417	2.484	2.472	2.994	2.464	2.61	2.412	2.631	2.983	2.971	2.962	2.843	2.812	3.046	2.793	2.942	3.053	2.854	2.923	3.038	2.878	3.011	2.861	2.979	2.86	3.347	3.693	3.495	2.613	2.719	2.674	2.386	2.236	2.934	2.791	2.333	2.792	3.077	2.521
ADAM33	3.29257	3.15871	3.27071	3.41114	3.16443	3.45786	3.07371	3.15686	3.35257	3.317	3.22443	3.107	3.16243	3.153	3.21457	3.08871	3.08586	3.08429	3.23671	3.38829	3.32886	3.33386	3.28786	3.27257	3.29257	3.35371	3.36457	3.34243	3.35757	3.40671	3.36086	3.38086	3.293	3.35514	3.51957	3.34343	3.46257	3.403	2.48729	2.81743	2.50429	2.58571	2.69629	2.72986	2.52129	2.65286	2.68843	2.546	2.52129
ADAM3A	2.688	2.916	2.628	2.813	2.405	2.78	2.549	2.777	2.654	2.664	2.676	2.555	2.721	2.759	2.658	2.612	2.326	2.543	2.495	3.346	3.014	3.265	3.389	3.3	3.312	3.217	3.207	3.506	3.361	3.215	3.295	3.483	3.344	3.267	3.403	3.275	3.574	3.993	2.457	2.145	2.288	2.191	2.203	2.524	2.195	2.196	2.384	2.414	2.615
ADAM7	2.42067	2.44467	2.382	2.82533	2.36767	2.477	2.392	2.49933	2.514	2.469	2.39967	2.50667	2.54	2.60267	2.413	2.424	2.316	2.396	2.457	2.84067	2.86233	2.86033	2.899	2.876	2.83367	2.83133	2.86733	2.745	2.92167	2.67	2.89333	2.84933	2.881	2.81033	2.976	2.86833	2.87833	3.03967	2.483	2.48933	2.528	2.49567	2.52533	2.54733	2.47833	2.44233	2.497	2.65233	2.399
ADAM8	6.73325	6.87875	6.629	6.7585	6.609	6.917	6.3825	6.38125	6.956	6.24375	6.86575	6.3975	6.7635	6.62375	6.4795	6.78925	5.99975	6.54775	6.56625	6.48775	6.6665	6.14525	6.6305	6.26875	7.0995	6.35575	6.73325	6.48125	6.63775	6.885	6.6805	6.53325	5.9425	6.335	6.57725	6.83625	7.0445	7.1135	5.15525	6.0225	5.658	5.29475	5.8445	5.44125	5.6735	5.76375	5.56875	5.46175	5.573
ADAM9	4.44075	5.264	5.16025	4.12075	5.22625	5.62825	4.93375	5.22825	4.22775	4.9815	5.188	5.1035	4.8375	5.58125	4.65025	4.75025	4.9905	5.239	4.862	5.815	5.7135	6.03725	5.803	5.55925	6.369	5.53075	5.231	5.571	5.445	5.53825	5.72625	5.953	5.3	5.77675	5.85875	5.5585	5.69375	5.299	4.91	5.128	5.39375	5.11975	5.243	5.08425	4.5575	5.21725	4.58525	5.40175	5.356
ADAMDEC1	2.9246	2.765	2.6176	3.803	2.4022	3.2836	2.6992	2.592	3.0608	2.8438	2.6734	2.4686	2.6062	2.7452	2.4952	2.732	2.4142	2.6754	2.6568	3.1582	3.246	3.3488	3.3316	3.1856	3.3494	3.113	3.2364	3.5552	3.3088	3.5904	3.1234	3.65	3.256	3.2972	2.963	3.0428	4.1414	4.1022	2.7974	2.567	2.8008	2.6156	2.7246	2.5414	2.7332	2.4806	2.7334	2.7724	3.0562
ADAMTS1	3.53	3.125	3.031	3.362	3.7745	3.056	3.076	3.4345	3.118	3.488	2.815	3.5455	3.147	3.3925	3.727	3.2085	3.1175	3.107	3.627	3.866	4.1065	4.2335	3.9215	4.2055	3.4485	3.431	3.999	3.77	3.6575	3.412	3.5505	3.855	4.09	3.93	4.291	3.816	3.758	3.6275	4.2455	3.325	3.827	3.687	3.784	3.6335	3.0715	3.2705	3.4395	3.749	3.2835
ADAMTS10	2.698	2.814	2.621	2.385	2.737	2.652	2.592	2.999	2.581	2.959	2.684	2.629	2.644	2.564	2.613	3.046	2.618	2.729	2.659	3.217	3.139	3.01	3.053	2.952	2.846	3.14	2.953	3.111	3.045	3.066	2.971	3.003	3.087	3.031	2.984	2.966	2.858	3.052	2.582	2.411	2.151	2.28	2.199	2.458	2.299	2.386	2.142	2.297	2.312
ADAMTS12	2.4945	2.479	2.3445	2.6445	2.4755	2.7005	2.4105	2.432	2.4995	2.561	2.3925	2.3195	2.343	2.4345	2.332	2.462	2.4085	2.538	2.5445	3.271	3.066	3.029	3.1865	3.111	3.036	3.03	3.2795	3.2175	3.121	3.1725	3.173	3.196	3.252	3.191	3.287	3.055	3.1545	3.3085	2.514	2.6	2.7655	2.525	2.5985	2.5775	2.551	2.7045	2.6005	2.5835	2.52
ADAMTS13	2.892	2.781	2.715	3.2565	2.7775	3.1555	2.9445	2.76	2.808	2.9585	2.9545	2.936	2.8455	2.8765	2.617	2.6005	2.957	2.908	2.7385	3.3575	3.327	3.361	3.2985	3.3435	3.317	3.2415	3.2785	3.246	3.4705	3.445	3.2865	3.1855	3.461	3.372	3.1635	3.4595	3.451	3.2175	2.856	2.6725	2.5245	2.648	2.586	2.607	2.558	2.768	2.7645	2.796	2.761
ADAMTS14	2.6165	2.684	2.578	2.2785	2.5125	2.6295	2.495	2.6535	2.6	2.6605	2.423	2.5125	2.297	2.4825	2.674	2.3685	2.624	2.551	2.517	3.113	3.077	3.0355	3.059	3.144	2.837	2.9765	3.222	2.968	3.041	3.2295	3.0615	3.1255	3.024	3.166	3.2845	3.1705	3.188	3.171	2.33	2.5575	2.4815	2.416	2.3775	2.4895	2.416	2.526	2.5665	2.499	2.2485
ADAMTS15	3.527	3.064	2.878	2.885	2.9445	3.0775	2.836	3.084	2.951	3.083	2.899	2.8285	2.8985	3.135	3.1165	2.9765	3.0545	2.8795	3.1955	3.623	3.2875	3.2175	3.205	3.288	3.3095	3.345	3.5285	3.3715	3.5035	3.3705	3.5375	3.383	3.28	3.3045	3.309	3.452	3.6335	3.52	2.5015	2.515	2.5155	2.5605	2.776	2.714	2.456	2.548	2.5305	2.385	2.6135
ADAMTS16	2.751	2.4215	2.307	3.056	2.512	2.6135	2.269	2.3285	3.042	2.365	2.667	2.3505	2.447	2.5115	2.418	2.4105	2.389	2.3645	2.4915	3.0625	3.074	3.0725	2.9985	3.0645	3.1185	3.042	3.105	3.2605	3.202	3.0285	3.1715	2.988	3.2175	3.1805	3.1575	2.8965	3.4665	3.4845	2.4635	2.383	2.562	2.609	2.4275	2.552	2.561	2.531	2.474	2.431	2.6625
ADAMTS17	4.779	4.281	4.324	4.576	5.124	4.351	4.344	3.626	4.527	4.431	4.142	5.053	4.831	4.991	5.08	4.763	5.297	4.152	4.585	5.383	5.094	4.803	5.095	4.465	5.335	5.192	5.414	5.715	5.54	4.423	5.306	4.9	5.559	5.253	5.352	5.098	5.299	3.882	3.968	3.813	3.858	4.841	4.718	3.461	3.913	4.54	6.275	4.741	5.192
ADAMTS18	2.4625	2.52925	2.541	2.6235	2.3535	2.568	2.348	2.54025	2.682	2.5525	2.43825	2.446	2.379	2.504	2.44125	2.408	2.4865	2.447	2.53925	3.00375	2.9625	2.9945	2.93725	2.99225	3.014	3.01725	2.99475	3.0155	2.91775	2.999	2.87925	3.0385	2.988	2.963	2.92975	2.918	3.035	3.0815	2.52425	2.59925	2.53975	2.53475	2.4205	2.4545	2.46475	2.43775	2.45725	2.56	2.43625
ADAMTS19	2.521	2.4745	2.274	2.4615	2.2705	2.6565	2.4095	2.4635	2.7255	2.4525	2.366	2.2995	2.342	2.4745	2.308	2.33	2.373	2.4915	2.55	3.185	3.2185	3.293	3.1125	3.04	2.9225	3.0285	3.1785	3.1295	3.021	3.101	3.1445	3.3725	3.186	3.153	3.1525	3.245	3.3495	3.4195	2.7455	2.935	2.72	2.5735	2.88	2.735	2.892	2.771	2.917	3.0325	2.8545
ADAMTS2	2.381	2.336	2.258	2.289	2.205	2.374	2.175	2.205	2.3445	2.401	2.332	2.305	2.241	2.3155	2.1215	2.191	2.233	2.1575	2.261	2.943	2.925	2.786	2.8935	2.838	2.928	2.8375	2.861	2.967	2.867	2.8495	3.0745	2.844	2.801	2.83	2.8605	2.9095	2.939	2.87	2.382	2.524	2.3155	2.324	2.305	2.643	2.415	2.665	2.355	2.2855	2.213
ADAMTS20	2.5335	2.3465	2.3245	2.7185	2.318	2.2455	2.2095	2.4025	2.8665	2.3345	2.366	2.371	2.313	2.4575	1.97	2.2585	2.3725	2.3255	2.352	2.8585	2.8835	2.596	2.829	2.8295	2.728	2.7275	2.8935	2.813	2.8135	2.9025	2.97	2.9815	2.8475	2.804	2.783	2.8525	2.9195	3.0055	2.3245	2.3245	2.4775	2.349	2.2795	2.372	2.6025	2.386	2.3765	2.428	2.2485
ADAMTS3	2.70633	2.888	2.895	2.992	2.82033	2.94367	2.832	2.91067	2.71967	2.86067	2.83533	2.754	2.719	2.81867	2.82767	3.021	2.72667	2.989	2.81767	3.19167	3.114	3.192	3.14167	3.06733	3.23067	2.983	3.19467	3.199	3.04733	3.11267	3.138	3.28067	3.204	3.03133	3.05333	3.17567	3.252	3.17867	2.78767	2.50133	2.64767	2.70133	2.70633	2.68533	2.569	2.52833	2.717	2.803	2.679
ADAMTS4	3.9725	3.375	4.031	3.3865	3.6435	3.633	3.777	3.5185	3.4555	3.371	3.6565	3.771	3.4245	4.109	4.024	3.7675	3.961	3.459	3.7445	4.2475	4.4405	4.29	4.005	4.3445	4.12	4.3925	4.329	4.3685	4.59	4.0825	4.7035	4.577	3.9845	4.442	4.7945	4.6025	4.681	3.7915	4.193	4.148	3.8165	3.7785	3.7445	3.7845	4.1215	3.769	4.297	3.861	4.3245
ADAMTS5	2.846	3.40525	3.58625	3.278	3.97525	2.9335	3.4935	3.8935	2.974	3.11975	3.46825	3.24875	3.7195	3.95525	2.975	3.19975	3.39575	3.73275	3.2035	5.102	4.556	3.96425	4.00625	4.1995	4.3985	3.66625	3.76425	3.86425	3.99225	4.20825	4.11225	4.413	3.71625	4.36275	4.39175	3.7015	3.50975	4.81225	4.40675	4.338	4.26725	3.46125	4.114	4.004	3.95375	3.71525	3.64825	4.69625	3.97175
ADAMTS6	2.2325	2.3465	2.23	2.2895	2.25	2.9645	2.1535	2.376	2.401	2.1955	2.318	2.397	2.0285	2.2615	2.337	2.8225	2.3415	2.2	2.667	2.7955	2.905	2.8725	2.602	2.92	2.8435	2.69	2.843	3.154	2.6795	2.844	2.425	2.8745	2.9305	2.9265	2.8125	2.7535	3.022	2.924	2.8645	2.2825	2.1535	2.205	2.2655	2.3215	2.514	2.047	2.4535	2.446	2.3855
ADAMTS7	2.47333	2.44533	2.73767	2.74467	2.6	2.45067	2.546	2.525	2.65067	2.44567	2.40367	2.34467	2.52967	2.44967	2.46733	2.387	2.33867	2.34867	2.62567	3.02267	2.82667	2.92	2.88133	2.89967	2.896	2.95567	3.03567	2.89767	2.95967	2.99167	3.11833	2.91033	2.87567	3.042	3.13867	2.85833	3.085	3.11667	2.15933	2.307	2.253	2.21233	2.23567	2.28833	2.23667	2.35633	2.37567	2.17633	2.18767
ADAMTS8	2.997	3.157	3.359	3.272	3.364	3.786	3.176	3.398	3.41	3.573	3.281	3.41	3.173	3.186	3.425	3.109	3.254	3.281	3.632	3.429	3.124	3.163	3.307	3.2	3.246	3.078	3.36	3.158	3.017	3.596	3.343	3.125	3.187	3.303	3.36	3.335	3.384	3.391	2.442	2.665	2.726	2.505	2.814	2.604	2.553	2.511	2.421	2.435	2.564
ADAMTS9	2.1005	2.0675	2.0005	2.1975	2.006	2.001	2.06	2.132	2.035	1.821	2.0575	2.143	2.2145	2.0555	2.064	1.9595	1.976	1.922	2.0625	2.678	2.4525	2.462	2.472	2.4945	2.672	2.5935	2.5105	2.623	2.5075	2.493	2.5845	2.5905	2.4905	2.4465	2.58	2.4855	2.5495	2.7755	2.0865	2.1655	2.082	2.1485	2.249	2.2135	2.0615	2.1835	2.137	2.2115	2.1505
ADAMTSL1	2.59725	2.61287	2.60775	2.72288	2.55175	2.65925	2.53812	2.58012	2.56062	2.67975	2.6035	2.64237	2.60225	2.5865	2.63275	2.667	2.61325	2.467	2.70275	3.15488	3.1115	3.14588	3.22	3.17975	3.16737	3.20125	3.21175	3.23088	3.14075	3.19837	3.14725	3.22562	3.17425	3.203	3.34687	3.17	3.29475	3.24288	2.47838	2.5735	2.52537	2.55075	2.52125	2.59325	2.68375	2.53025	2.5895	2.62375	2.54838
ADAMTSL2	2.37	2.4045	2.4335	2.559	2.4855	2.931	2.3435	2.243	2.4635	2.448	2.394	2.193	2.468	2.449	2.4265	2.309	2.279	2.341	2.51	3.1915	3.083	3.149	3.2705	2.9985	3.138	3.2365	3.164	3.0385	3.064	3.004	3.327	3.0965	3.102	2.8985	3.2405	3.033	2.958	3.0865	2.1825	2.472	2.2215	2.3305	2.2395	2.211	2.28	2.362	2.4735	2.118	2.123
ADAMTSL3	2.379	2.067	2.233	2.181	1.969	2.325	1.996	2.225	2.129	2.147	2.21	1.885	2.108	2.167	1.991	2.062	1.996	2.271	2.315	2.962	2.877	2.876	3.094	3.011	2.692	2.684	2.85	2.754	2.789	2.615	2.972	2.777	2.919	2.794	2.97	2.828	2.891	3.004	2.24	2.322	2.289	2.23	2.387	2.26	2.275	2.151	2.229	2.411	2.265
ADAMTSL4	4.27333	4.576	4.68667	4.31233	4.83667	4.91867	4.36967	3.63367	4.72667	4.774	4.73967	3.94667	4.05933	4.36067	3.848	3.997	4.418	4.29667	4.38367	4.94967	4.852	4.92933	4.941	4.56733	5.10733	4.62167	4.77633	4.51267	5.08467	5.46533	4.94733	4.92533	4.48467	4.23567	5.02733	4.67933	4.71567	4.847	3.69167	3.99867	4.02567	3.764	4.274	3.141	3.941	4.437	4.01633	3.35333	3.885
ADAMTSL5	2.743	2.626	2.91233	2.79533	2.72733	2.755	2.79467	2.741	2.76567	2.61833	2.97367	2.55167	2.92267	2.712	2.537	2.87033	2.90667	2.734	2.736	2.99267	2.88167	2.95467	2.98967	2.87167	2.866	3.03067	2.93333	2.88633	3.158	2.968	3.195	2.97067	3.09067	2.947	3.035	3.013	2.93233	3.00533	2.57433	2.61367	2.58167	2.54167	2.62767	2.53	2.534	2.669	2.777	2.581	2.603
ADAP1	3.9625	3.956	3.746	3.93	3.868	3.728	3.75	3.541	3.8	3.945	3.906	3.8215	3.845	3.826	4.0495	3.534	3.8405	3.875	4.127	4.1645	4.119	4.042	4.2475	3.983	4.3325	4.276	4.1235	3.685	4.1655	4.184	3.9415	4.164	3.899	3.8515	4.332	4.0745	3.8875	3.98	2.9655	3.414	3.0915	3.1075	3.0805	3.201	3.2985	3.2145	3.197	2.869	3.165
ADAP1 /// COX19	3.261	2.93367	2.69833	3.16633	2.887	2.753	2.79	2.70533	2.79167	2.87067	2.88967	2.665	2.99767	2.69833	2.91533	2.782	2.596	2.82333	2.737	3.649	3.556	3.353	3.41233	3.295	3.29867	3.441	3.34367	3.155	3.40467	3.37067	3.514	3.45633	3.40533	3.59467	3.53833	3.67433	3.51933	3.50267	2.51633	2.63467	2.58367	2.775	2.586	2.70267	2.682	3.04267	2.66267	2.57933	2.48267
ADAP2	5.526	5.312	5.4035	5.2825	5.5085	4.322	4.8735	5.0355	4.7155	5.365	4.741	4.838	5.6895	4.949	5.0105	4.535	5.1125	4.8515	4.7535	6.1475	5.271	6.0455	5.608	5.45	5.834	5.586	5.761	5.224	6.059	5.5035	5.6615	5.398	4.9815	5.4085	5.35	4.9415	5.399	5.331	3.4045	4.3695	4.1265	4.681	4.695	4.835	3.5965	5.6685	3.9395	3.813	3.997
ADAR	9.322	9.49167	8.73867	9.586	9.26167	8.5675	9.264	8.81933	9.265	9.09217	9.19933	9.08933	9.40567	9.12383	9.24433	9.4105	8.67683	9.29883	9.09183	8.879	9.0485	9.0455	9.36983	8.79033	9.43867	9.09333	9.445	8.93233	9.50283	9.57067	9.28617	8.80767	9.08633	8.93383	8.877	9.2895	9.32517	9.10367	8.19967	8.908	8.65017	8.9145	8.4615	8.60683	8.5575	9.0835	8.357	8.16033	8.41517
ADARB1	4.2606	3.9774	4.22	4.2344	4.0694	4.2548	4.219	4.379	4.244	4.5188	4.2138	4.3234	4.2078	4.048	4.4416	4.407	4.362	4.0586	4.234	4.67	4.5412	4.6364	4.3316	4.5938	4.352	4.4136	4.6242	4.4184	4.794	4.4108	4.547	4.5126	4.7894	4.5054	4.57	4.3746	4.459	4.435	3.5152	3.5246	3.5748	3.838	3.3914	3.8884	3.5436	3.7214	3.626	3.5078	3.4378
ADARB2	3.0324	2.7394	2.9628	3.0622	2.8748	2.956	2.8146	2.7304	2.8678	2.8958	3.4038	2.7278	2.9862	2.7856	2.721	2.9364	2.6712	2.9018	3.6612	3.2938	3.466	3.2874	3.3256	3.3038	3.4816	3.1518	3.4228	3.2306	3.2768	3.2666	3.3388	3.2654	3.218	3.2024	3.4104	3.1052	3.6452	3.527	2.479	2.6632	2.4884	2.4228	2.6636	2.6102	2.7058	2.7094	2.6788	2.5496	2.35
ADAT1	5.6125	5.5725	5.253	5.488	5.33	4.86	5.504	5.2605	5.147	5.2505	5.253	5.527	5.364	4.9315	5.5785	5.385	5.307	5.0925	5.1805	5.4015	5.502	5.626	5.5745	5.24	5.982	5.7875	5.4315	5.6175	6.0295	5.653	5.4375	5.278	6.019	5.3525	5.184	5.529	5.41	5.2275	5.043	5.1315	4.637	5.444	4.917	4.838	4.678	5.348	4.556	4.662	4.7625
ADAT2	4.317	4.436	4.15467	4.823	4.66767	5.116	4.664	4.68067	5.061	4.757	4.70033	4.853	4.54967	4.4	4.83533	4.97667	5.15567	4.28567	4.22567	5.23533	5.426	5.50033	5.02567	5.45933	5.195	5.381	5.06867	5.251	5.18867	4.84967	5.389	5.495	5.804	5.646	5.147	5.431	4.76867	5.14467	4.551	4.39367	5.20433	5.13867	4.85167	4.91567	5.26933	4.194	4.04167	5.547	5.22267
ADAT3	3.041	3.04	3.222	3.272	3.139	3.228	2.948	2.921	2.734	3.178	3.121	3.049	3.308	2.866	2.946	3.003	2.838	2.923	3.28	3.447	2.987	3.288	3.126	3.199	2.82	2.922	3.306	3.032	3.391	3.158	3.446	2.808	3.201	3.289	3.242	3.153	2.83	2.816	2.105	2.444	2.135	2.136	2.231	2.44	2.262	2.386	2.316	1.988	2.475
ADC	2.92182	2.86991	2.76282	3.11064	2.85345	2.89691	2.74282	2.81955	2.98245	2.82118	2.868	2.79864	2.84055	2.91127	2.90227	2.83945	2.87536	2.84573	2.86618	3.36409	3.17109	3.17236	3.18355	3.19355	3.15555	3.214	3.23482	3.139	3.20891	3.30864	3.24673	3.23109	3.25018	3.29464	3.341	3.16555	3.31291	3.30773	2.51091	2.59136	2.52664	2.63018	2.54182	2.64427	2.64155	2.66255	2.63	2.57818	2.55027
ADCK1	4.29725	4.66475	4.844	4.41125	4.167	4.718	4.162	4.378	4.5475	4.4005	4.26875	4.44125	4.62775	4.2795	4.049	4.181	4.4585	3.9075	4.513	5.546	5.3095	5.22925	5.40625	5.81325	5.01125	5.40425	5.51675	5.08075	5.41	5.1955	6.083	5.4525	5.64425	5.4435	5.715	6.14675	5.127	5.20275	4.009	3.87525	4.008	3.972	4.0745	4.032	4.1475	4.23025	4.001	3.94825	3.593
ADCK2	4.31967	4.447	4.348	4.51233	4.213	3.66267	4.37133	4.43067	4.203	4.59667	4.364	4.448	4.43967	4.22833	4.52633	4.27367	4.436	4.21167	4.261	4.05667	4.49533	4.35733	4.57433	4.33233	4.17367	4.574	4.47067	4.37433	4.65033	4.408	4.14067	4.602	4.482	4.30467	4.55967	4.55433	4.164	4.21033	3.327	3.58933	3.489	3.689	3.517	3.668	3.63833	3.94567	3.74467	3.34	3.40767
ADCK4	6.097	6.016	5.903	6.031	6.31	5.92	6.246	6.152	6.584	5.92	5.989	5.787	6.367	6.137	6.211	6.14	5.913	6.065	6.274	6.296	6.622	6.343	6.603	6.073	6.696	6.425	6.24	6.357	6.962	6.557	6.361	6.429	6.133	6.365	6.118	6.885	6.351	6.309	4.793	5.361	5.329	5.104	5.259	5.381	5.703	5.665	4.945	4.719	5.148
ADCK5	2.598	2.782	2.642	2.171	2.676	2.547	2.453	2.538	2.867	2.528	2.389	2.607	2.551	2.312	2.657	2.548	3.019	2.633	3.057	3.255	3.246	3.44	3.245	3.518	3.189	3.419	3.33	3.201	3.606	3.291	3.138	3.483	3.243	3.071	3.588	3.222	3.32	3.011	2.681	2.578	2.701	2.513	2.589	2.725	2.644	2.574	2.573	2.595	2.419
ADCY1	2.681	2.445	2.421	2.775	2.578	2.994	2.04	2.516	2.562	2.404	2.69	2.42	2.542	3.132	2.435	2.567	2.426	2.324	2.381	3.207	3.243	3.179	3.176	3.176	2.913	3.341	3.254	3.36	3.067	3.191	2.907	3.107	3.126	3.286	3.344	3.214	3.314	3.185	2.799	2.615	2.652	2.852	2.642	2.798	2.538	2.613	2.791	2.848	2.655
ADCY10	3.345	2.907	2.34	4.075	3.624	3.176	2.886	2.496	2.742	2.302	2.751	2.143	2.561	3.074	2.882	3.257	2.668	3.384	3.314	2.834	3.017	2.748	2.871	3.217	3.281	3.242	3.58	2.947	3.021	3.296	3.056	3.331	2.9	2.783	2.694	3.083	3.023	4.24	2.696	2.477	3.428	2.8	2.878	2.838	2.947	2.905	2.878	2.292	2.544
ADCY2	2.845	2.63075	2.71325	3.12125	2.68025	2.86525	2.73575	2.75275	2.87	2.5495	2.67525	2.63475	2.6855	2.62975	2.714	2.80475	2.6165	2.65875	2.761	3.23825	3.20175	3.2245	3.248	3.28525	3.2015	3.2915	3.279	3.22975	3.26825	3.33425	3.28	3.285	3.15325	3.211	3.334	3.21625	3.6885	3.62125	2.7025	2.7775	2.77925	2.61125	2.682	2.6845	2.657	2.6365	2.652	2.81125	2.6595
ADCY3	6.023	5.988	5.84	6.105	6.03	6.496	6.088	6.156	6.259	6.196	6.03	6.07	6.365	6.126	6.559	5.769	6.363	5.904	6.428	6.338	6.328	6.32	6.12	6.225	6.622	6.344	6.276	6.24	6.463	6.129	6.273	6.082	6.509	6.618	6.643	5.796	5.805	6.131	5.776	5.323	5.014	5.772	5.334	5.753	4.976	5.736	5.743	5.21	5.267
ADCY4	5.361	5.767	5.936	5.706	5.805	6.291	5.536	5.519	6.67	5.453	6.001	5.471	5.92	5.609	5.818	5.712	4.885	5.346	6.157	5.919	6.704	6.11	6.862	5.722	6.926	6.045	6.893	6.347	7.134	7.151	6.939	6.782	8.041	6.293	6.513	6.504	7.143	7.254	5.369	6.521	5.993	5.259	6.219	5.531	5.684	6.189	5.87	5.772	6.282
ADCY5	2.721	2.833	2.404	2.854	2.457	2.741	2.817	2.578	2.754	2.634	2.549	2.286	2.394	2.493	2.286	2.309	2.132	2.278	3.003	3.159	2.881	3.166	2.833	2.862	2.827	2.906	3.175	3.107	2.848	3.185	3.119	3.057	2.782	2.946	3.218	2.868	3.078	3.117	2.468	2.918	2.283	2.472	2.311	2.297	2.377	2.489	2.717	2.21	2.408
ADCY6	2.423	2.343	2.352	2.3125	2.546	2.4685	2.211	2.3185	2.1485	2.3175	2.4095	2.1955	2.4485	2.3085	2.3945	2.4655	2.147	2.354	2.361	2.8445	2.8515	2.6705	2.706	2.8015	2.77	2.7535	2.8175	2.926	2.9225	2.965	2.802	2.942	2.7935	2.6385	3.23	2.7475	2.8885	2.9535	2.273	2.378	2.3525	2.4065	2.274	2.3735	2.571	2.4095	2.214	2.236	2.1795
ADCY7	6.92067	7.042	6.585	6.68033	6.95767	6.76667	6.65633	6.824	6.27167	6.763	6.639	6.78033	6.443	6.89867	6.75767	6.58167	6.757	6.52267	6.834	6.75567	6.63333	6.746	6.85567	6.62033	6.79933	6.81667	6.80233	6.40067	6.71167	6.406	6.54267	6.39667	6.606	6.59033	6.647	6.765	6.62567	6.52267	5.67167	6.17167	6.05667	6.499	6.083	6.289	5.556	6.381	5.837	6.455	6.14967
ADCY8	2.45	2.084	2.314	2.262	2.239	2.377	2.384	2.221	2.697	2.959	2.367	2.318	2.332	2.075	2.37	2.316	2.239	2.38	2.178	2.836	2.745	2.719	2.807	2.606	2.698	2.668	2.609	2.61	2.497	2.993	2.629	2.807	2.569	2.581	2.728	2.631	2.601	2.712	2.254	2.052	2.236	2.222	2.066	2.055	2.122	2.599	2.236	2.089	2.317
ADCY9	3.94033	4.10333	4.083	4.06367	4.09533	3.76467	4.023	4.054	3.75933	3.964	4.126	4.12567	4.216	3.72633	3.83767	3.63433	3.716	3.826	3.825	4.069	4.07333	3.876	4.19533	4.11533	3.815	4.199	4.024	4.21967	3.99933	4.33733	4.02	3.97767	3.93267	4.086	4.086	4.3	3.81233	3.71667	3.439	3.14733	3.17133	3.40867	3.39833	3.499	3.11333	3.5	3.17333	3.46167	2.92967
ADCYAP1	2.549	2.369	2.25867	2.81533	2.33	2.78167	2.31533	2.29333	2.47333	2.33367	2.43267	2.246	2.50833	2.42733	2.41233	2.343	2.131	2.50767	2.477	3.01233	2.847	2.829	2.77267	2.77567	2.93733	2.75367	2.89367	2.86967	2.81033	3.07833	2.89067	2.846	3.019	2.855	2.87133	2.852	3.01133	3.115	2.41367	2.39867	2.258	2.455	2.48767	2.34233	2.339	2.38767	2.47133	2.42933	2.372
ADCYAP1R1	3.08433	2.82433	2.804	3.26367	2.61667	3.012	2.86967	2.73967	2.75067	2.713	2.596	2.703	2.83667	2.71	2.905	2.775	2.69433	2.83567	2.89833	3.43567	3.24133	3.315	3.28467	3.303	3.26467	3.36667	3.52833	3.25833	3.361	3.18433	3.273	3.406	3.21467	3.17067	3.29233	3.30067	3.501	3.312	2.84267	2.70133	2.61367	2.45667	2.66867	2.75667	2.70867	2.60933	2.594	2.655	2.59633
ADD1	7.3338	7.3204	7.0154	7.3526	7.2516	7.307	7.2086	6.9588	7.3292	7.6544	7.1494	7.0558	7.3602	7.1988	7.3878	7.3806	6.9456	7.3092	6.9374	7.3908	7.2462	7.3488	7.338	7.1812	7.7582	7.3674	7.4976	7.3412	7.4928	7.6644	7.2908	7.0616	7.3768	7.1716	7.2988	7.5286	7.2732	7.0004	5.9626	6.8132	5.974	6.8824	6.0376	6.6698	5.9882	6.9652	6.325	5.6716	5.947
ADD2	3.009	2.8375	3.01683	3.20267	2.789	2.9765	2.90967	2.9325	2.921	3.295	2.891	2.76517	2.98083	3.09517	3.06367	2.878	2.80233	3.26867	2.97333	3.6275	3.45567	3.50717	3.55133	3.50583	3.59133	3.43967	3.65867	3.6995	3.63667	3.67683	3.651	3.6705	3.43517	3.56467	3.6515	3.46117	3.6945	3.48917	2.8625	2.8855	2.75933	2.65317	2.71833	2.8425	2.7855	2.5625	2.83917	2.77033	2.61733
ADD3	9.8154	9.475	9.477	9.5176	9.6604	9.771	9.8938	9.9884	9.4178	9.5616	9.6712	9.9798	9.4028	9.8028	9.704	9.842	9.9276	9.7978	9.6254	10.255	10.4068	10.4006	10.0162	10.2988	10.2842	10.2824	10.238	10.4188	10.1878	10.1592	10.202	10.4692	10.6114	10.485	10.2482	10.3108	10.2116	10.2494	10.3338	9.7992	10.0804	10.0504	10.023	9.9966	10.3044	9.5994	10.0948	10.1996	10.2654
ADH1A	3.2265	2.9345	2.9075	2.963	2.66	3.105	2.812	2.8295	2.921	2.8895	2.847	2.715	3.0995	2.876	3.068	2.942	2.785	2.9505	3.0245	3.135	3.149	3.344	3.149	3.2075	2.9565	3.053	3.2515	3.092	3.164	3.211	3.1585	3.267	3.0825	3.173	3.2425	3.1835	3.215	3.321	2.7	2.6415	2.588	2.653	2.57	2.728	2.8385	2.8145	2.6865	2.655	2.797
ADH1A /// ADH1B /// ADH1C	3.459	3.064	3.043	3.156	2.904	3.35	3.053	3.177	3.484	3.344	3.114	2.786	3.004	3.059	3.092	2.77	2.815	3.224	2.983	4.211	4.027	3.949	4.261	4.024	3.885	3.849	4.22	4.063	3.978	3.835	4.222	4.305	3.7	4.029	3.759	3.873	4.358	3.954	2.88	2.481	2.884	2.626	2.463	2.601	2.882	2.87	2.601	2.86	2.655
ADH1B	2.339	2.4236	2.3414	2.6842	2.4042	2.3758	2.3578	2.3208	2.4366	2.584	2.4652	2.2966	2.3506	2.4056	2.2714	2.2384	2.4144	2.314	2.509	2.9628	2.955	2.8622	2.8632	2.8806	2.7998	2.8136	2.9244	2.9742	2.81	2.8126	3.0396	3.0788	2.8956	2.928	2.9036	2.7736	3.1012	3.0758	2.3778	2.306	2.3636	2.2464	2.3702	2.3232	2.44	2.2642	2.4788	2.4696	2.4408
ADH1C	2.3215	1.824	1.979	2.1265	1.919	2.1435	1.9	1.8825	1.891	1.972	1.877	1.908	2.035	2.0375	2.0495	1.899	2.046	1.8575	1.8555	2.581	2.6665	2.671	2.674	2.725	2.617	2.597	2.6675	2.7345	2.5815	2.641	2.564	2.6385	2.659	2.6085	2.7725	2.7155	2.698	2.585	2.049	2.163	2.165	2.0395	2.17	2.1505	2.207	2.09	2.176	2.1745	2.0335
ADH4	2.421	2.794	2.531	2.737	2.618	2.706	2.658	2.565	2.68	2.533	2.439	2.619	2.605	2.438	2.507	2.488	2.364	2.383	2.751	3.382	3.074	3.034	3.069	2.953	3.156	3.178	3.103	3.346	3.035	2.977	3.206	3.04	3.072	2.977	3.057	2.977	3.059	3.074	2.458	2.705	2.562	2.601	2.625	2.762	2.824	2.79	2.567	2.792	2.647
ADH5	5.5585	5.48775	6.001	5.50025	5.6295	5.025	5.8535	6.38375	5.655	5.59625	5.822	5.99125	5.3285	5.9065	5.42925	5.9	6.437	5.54675	5.6305	6.32975	6.70925	6.338	6.17725	6.5735	6.07625	6.25825	6.26625	6.6055	6.43375	5.797	5.83525	6.47875	6.5525	6.50125	6.27375	6.30325	5.746	6.15775	6.936	6.03475	6.42375	6.0505	6.14525	5.81025	6.51225	5.15425	6.34075	6.9745	6.59925
ADH6	2.36533	2.14733	2.21967	2.30233	2.03767	2.08233	2.144	2.22367	2.34567	2.25767	2.17967	2.17033	2.22933	2.09633	2.19933	2.221	2.14733	2.28133	2.26067	2.874	2.759	2.915	2.848	2.72833	2.80333	2.83567	2.77733	2.95033	2.71333	2.922	2.87733	2.88433	2.94833	2.76133	2.789	2.77533	2.833	2.83	2.40833	2.33533	2.486	2.34533	2.42933	2.35533	2.475	2.44333	2.31433	2.511	2.25733
ADH7	1.917	1.8605	1.7935	2.1755	2.128	2.024	2.01	1.976	2.109	2.0665	2.0815	1.9265	2.0145	1.8225	1.963	2.241	1.9615	2.031	1.9665	2.7405	2.72	2.7785	2.643	2.6645	2.7105	2.7265	2.8095	2.8	2.8085	2.727	2.7245	2.7325	2.7495	2.594	2.574	2.759	2.7515	2.778	2.39	2.3795	2.2755	2.3445	2.3155	2.3145	2.4305	2.32	2.2475	2.363	2.3335
ADHFE1	4.9685	5.218	4.9155	5.029	5.57	5.348	5.2285	5.675	4.8775	4.7675	5.214	5.596	5.354	4.9915	4.747	4.7995	5.3885	5.0375	5.0285	4.9675	5.2055	5.412	5.2535	5.5325	4.658	5.267	5.173	5.342	5.141	4.9595	5.221	5.143	5.7835	5.48	5.311	5.193	4.861	5.631	4.221	4.536	4.704	4.563	5.002	4.461	4.528	4.707	4.4885	4.79	4.923
ADI1	6.82333	6.48033	6.894	6.93633	6.849	6.55167	6.78567	6.45567	6.36433	6.406	6.82833	6.30267	6.728	6.451	6.36167	6.81833	6.93667	6.80367	6.484	7.157	7.647	7.103	7.342	7.91733	7.75567	7.25933	6.988	7.524	7.62733	7.802	7.76067	7.28367	7.97967	7.286	7.27233	6.702	6.97533	7.58667	6.33533	6.56567	6.15667	6.42333	5.92233	6.66	7.08767	6.501	5.95367	6.34	6.62167
ADIG	2.223	2.578	2.331	2.289	2.34	2.376	2.267	2.205	2.272	2.373	2.218	2.177	2.108	2.144	2.06	2.227	2.224	1.994	2.268	2.841	2.659	2.886	3.032	2.829	2.811	2.624	2.85	2.913	2.722	2.898	2.989	3.15	3.151	2.717	2.934	3.037	2.893	2.857	2.411	2.395	2.54	2.44	2.525	2.396	2.467	2.526	2.39	2.645	2.539
ADIPOQ	2.73925	2.62075	2.46525	3.08525	2.4745	2.94975	2.522	2.445	2.618	2.42625	2.3615	2.38225	2.568	2.54075	2.3965	2.41275	2.41625	2.64825	2.453	3.229	3.01875	3.02825	3.12025	3.18025	3.0435	3.16925	3.11975	3.10475	3.16525	3.138	3.104	3.056	3.05875	3.20225	3.14275	3.0765	3.3635	3.5275	2.5385	2.65075	2.42525	2.5755	2.52925	2.565	2.6035	2.60525	2.52	2.619	2.62075
ADIPOR1	10.315	10.1463	10.4902	10.0597	10.403	10.714	10.473	9.29175	10.359	11.3075	10.5785	9.527	10.4548	10.3125	10.8503	11.0862	9.6665	10.9195	9.9535	11.0668	9.5195	11.114	10.1527	10.1523	10.9908	10.4503	10.1728	10.8655	10.4373	10.9132	10.2278	10.774	10.3075	10.0162	9.99725	10.4443	10.1605	10.0348	8.23075	10.612	9.64075	10.6258	9.877	10.1113	9.611	10.4185	10.027	9.445	9.95125
ADIPOR2	7.5545	7.6075	6.984	7.161	7.464	6.689	7.575	6.963	7.2705	7.5075	7.486	7.167	7.717	7.1635	7.698	7.5975	7.066	7.4685	7.151	8.021	7.8455	7.9735	8.1885	8.0485	8.023	8.1835	7.976	8.0545	8.464	8.196	8.0425	7.6575	8.098	7.796	7.729	8.146	8.1105	7.954	7.389	7.765	7.772	7.856	7.661	7.5295	6.7985	8.15	7.038	6.944	7.286
ADK	5.852	5.693	5.977	5.379	6.688	5.843	5.8535	6.093	5.596	6.1275	5.99	6.599	5.5605	5.7485	6.006	6.3195	6.0915	6.209	5.8645	6.5745	6.9765	6.847	7.1905	7.3395	6.8515	6.2605	6.8155	7.412	6.406	6.6835	6.7935	6.971	7.396	7.47	7.4885	6.811	6.5155	6.565	6.88	5.9045	6.769	6.282	6.4605	6.752	6.6235	5.9555	6.386	6.438	6.5365
ADM	7.61367	7.48867	7.25833	7.71767	7.18467	8.135	7.63133	6.998	7.82067	6.91967	7.721	6.73633	7.42767	7.93	7.15933	7.68267	6.373	7.619	7.332	7.644	8.077	7.62867	8.20133	7.02833	8.078	7.13333	8.30667	7.83	7.474	7.85933	7.91667	8.14633	7.265	7.595	7.77833	7.81233	8.16167	8.18133	6.778	7.36167	7.268	6.42233	7.142	7.03567	6.88033	7.09533	7.373	7.279	6.90533
ADM2	2.68	2.4215	2.463	2.3885	2.609	2.519	2.401	2.2045	2.4535	2.5595	2.594	2.3015	2.418	2.519	2.4615	2.4925	2.4135	2.3345	2.332	3	2.897	2.9855	3.0245	3.034	3.0195	3.0845	2.961	3.1525	2.9345	3.0265	3.1325	2.9845	2.812	3.0885	3.132	3.277	3.236	3.0845	2.298	2.365	2.1965	2.2135	2.476	2.3675	2.1925	2.2965	2.4745	2.319	2.2335
ADNP	9.46233	9.57067	9.545	9.19267	9.86133	9.06133	9.61867	9.87533	9.259	9.42967	9.47367	10.0533	9.155	9.65467	9.385	9.38833	9.84733	9.31367	9.93867	10.0377	9.99867	9.915	10.1937	10.131	9.93933	9.97667	10.006	10.281	9.73567	9.68833	10.1393	9.888	10.2817	10.074	10.1357	10.0203	10.192	9.94067	10.0847	9.86	9.78867	10.0403	9.798	9.96433	9.65433	9.76733	9.88667	10.28	9.9
ADNP2	7.05	7.0005	7.043	7.071	7.082	8.139	7.1175	7.0325	7.0465	6.7845	7.0115	7.3315	6.9755	7.0535	7.163	6.8105	7.1405	7.166	7.1615	6.902	7.2025	7.1725	7.1815	7.2635	6.99	7.081	7.152	7.279	6.963	6.7695	7.0745	7.0425	7.2055	7.1315	7.402	7.1825	7.2325	6.7655	6.558	6.4805	6.5485	6.799	6.431	6.98	6.5855	6.9235	6.935	6.7975	6.6535
ADO	7.51833	7.65267	7.75633	7.327	7.66167	6.84433	7.78133	7.92567	7.169	7.59767	7.41167	7.93467	7.275	8.10067	7.33267	7.39533	7.89833	7.519	7.73567	8.77933	8.49933	8.86567	8.53367	8.78233	8.24867	8.358	8.459	8.61433	8.43433	8.375	8.40467	8.40267	8.617	8.64367	8.553	8.54067	8.29533	8.42167	8.26467	7.832	8.02433	8.32167	7.90667	8.01467	7.77067	7.982	7.90633	8.463	8.15133
ADORA1	2.20967	2.237	2.17967	2.26467	2.10567	2.13867	2.14967	2.127	2.13733	2.18433	2.21133	2.146	2.189	2.11267	2.14867	2.15533	2.365	2.07333	2.22133	2.60167	2.64467	2.62867	2.624	2.66667	2.70767	2.65533	2.72967	2.74033	2.67067	2.58533	2.71667	2.68633	2.58567	2.65033	2.70533	2.72667	2.706	2.697	2.30267	2.33867	2.123	2.214	2.23267	2.235	2.40267	2.08567	2.19367	2.21667	2.24267
ADORA2A /// CYTSA	6.346	5.896	5.7975	6.0635	5.866	6.052	6.0065	6.052	6.2925	6.14	5.983	6.0015	6.198	6.033	6.2215	6.099	6.0485	5.741	5.819	6.0465	6.0345	5.764	6.178	6.1555	6.2585	6.4815	6.1925	6.237	6.2085	6.1305	6.26	5.893	6.1105	6.1715	6.1275	6.255	6.314	5.9975	5.2385	5.5175	5.3035	5.565	5.597	5.631	5.7545	5.7865	5.391	5.016	5.392
ADORA2B	4.458	3.245	3.391	2.393	2.867	3.075	4.597	2.957	2.556	3.341	3.207	4.229	3.437	3.515	3.119	3.823	3.336	4.314	4.247	4.892	4.582	5.324	4.193	4.399	4.618	3.744	3.904	4.834	3.628	4.527	4.317	4.411	4.748	5.102	3.805	5.028	4.133	3.388	4.314	4.238	4.008	3.755	4.639	3.893	4.444	5.226	4.043	4.986	4.237
ADORA3	4.615	4.764	5.314	4.4395	4.665	3.577	6.2235	5.4025	5.0095	4.5105	5.23	4.961	5.618	5.4075	5.1465	5.042	5.3095	4.841	4.904	5.2745	5.449	5.232	5.5245	4.854	5.3895	5.145	5.476	5.2995	6.038	6.244	6.291	5.4935	4.251	5.3305	5.284	5.295	4.938	7.055	4.8495	5.4315	4.4335	4.1455	4.478	4.1185	5.4695	4.512	4.7675	3.858	5.001
ADPGK	6.33667	6.503	6.114	6.03033	6.41367	6.274	6.277	6.137	6.13367	6.03467	6.214	6.42867	6.17333	6.47767	6.24467	6.19833	6.307	6.295	6.29433	6.36267	6.33733	6.516	6.477	6.363	6.492	6.35767	6.477	6.35433	6.41367	6.49267	6.556	6.38667	6.48433	6.621	6.256	6.456	6.49733	6.585	5.91333	6.028	6.18267	6.17333	6.085	6.12	6.062	6.205	5.97567	6.20367	6.11967
ADPRH	4.70933	4.542	4.501	3.85967	4.006	3.309	3.96733	4.365	4.18433	4.27733	4.13333	4.05467	4.321	4.00033	4.061	4.13333	4.30967	4.00667	4.28633	4.63333	4.47767	4.53733	4.593	4.43	4.56067	4.691	4.456	4.369	4.48967	4.50533	4.501	4.09933	4.418	4.69467	4.41533	4.36833	4.618	4.498	4.257	4.08767	3.82333	3.75167	3.72533	3.96367	3.29067	3.93167	3.68333	3.35567	3.71533
ADPRHL1	3.06433	3.1	3.085	3.31333	2.97733	3.136	2.78733	2.96733	2.97133	3.073	3.19	2.96067	2.94833	3.00867	2.86133	2.82833	2.75733	2.707	3.22633	3.62233	3.63467	3.93233	3.78167	3.67133	3.753	3.77433	3.77467	3.78967	3.83967	3.773	3.58433	3.86933	3.69967	3.51467	3.727	3.88533	3.74067	3.76967	2.81633	2.898	2.86067	2.87167	2.87033	2.89933	2.69467	3.06633	2.928	2.65067	2.66133
ADPRHL2	7.0435	7.5225	7.249	7.4235	7.3115	5.8525	6.9765	7.115	7.3815	7.34	7.196	7.3105	7.292	6.9955	7.2265	7.221	7.1635	7.196	7.4285	6.955	7.171	6.851	7.129	6.893	6.9255	7.0605	7.0105	7.0595	7.401	7.1205	7.1185	7.063	6.755	6.9605	7.137	7.1095	7.267	6.966	6.0805	6.8555	6.6305	6.459	6.617	6.519	6.8535	6.7035	6.3945	6.38	6.0715
ADRA1A	2.3726	2.3628	2.3884	2.489	2.366	2.6246	2.3616	2.3432	2.4006	2.3964	2.3872	2.329	2.3904	2.3978	2.2406	2.2578	2.3002	2.4258	2.5186	2.8646	2.7788	2.8258	2.8492	2.8346	2.7398	2.8444	2.8834	2.7872	2.7112	2.7702	2.8964	2.7894	2.811	2.7362	2.8566	2.8258	3.0092	2.9396	2.2276	2.331	2.306	2.3456	2.3286	2.376	2.3996	2.2612	2.5636	2.488	2.357
ADRA1B	2.009	2.074	2.05	2.254	2.155	2.139	2.054	1.841	2.171	2.29	2.219	1.932	2.018	1.999	1.98	2.063	2.026	2.225	2.012	3.013	2.804	2.871	2.618	2.641	2.707	2.726	2.754	2.823	2.73	2.763	2.695	2.631	2.602	2.62	2.726	2.718	2.652	2.733	2.037	2.446	2.244	2.098	2.509	1.996	2.002	2.25	2.394	2.218	2.438
ADRA1D	2.569	2.4935	2.4855	2.6	2.5945	2.621	2.3285	2.49	2.7045	2.668	2.5625	2.5235	2.5985	2.581	2.375	2.4745	2.583	2.5705	2.5935	2.936	2.727	2.9565	2.9065	2.9435	2.819	2.9065	2.9905	2.8915	2.829	2.9085	2.8415	2.9005	2.851	2.865	3.0335	3.026	2.895	3.1465	2.2545	2.3955	2.447	2.426	2.524	2.483	2.6175	2.258	2.4555	2.3835	2.388
ADRA2A	2.964	2.726	2.456	3.467	3.142	3.093	2.741	2.699	3.043	3.231	2.969	3.102	3.061	3.264	2.87	3.364	2.746	3.092	2.759	3.647	3.394	3.091	3.162	3.235	2.882	3.363	3.041	3.346	3.063	3.217	3.191	3.854	3.053	2.939	3.218	2.936	3.552	3.177	3.004	2.598	2.561	2.57	2.803	2.71	2.562	3.014	2.704	2.601	2.612
ADRA2B	3.391	3.184	3.205	3.272	2.903	2.924	2.643	3.161	2.904	2.85	2.989	2.929	3.34	2.918	3.057	2.806	3.019	2.646	2.841	3.221	3.209	3.036	3.203	3.276	3.301	3.333	3.229	3.273	3.371	3.229	3.356	3.401	3.265	3.084	3.48	3.444	3.363	3.113	2.73	3.054	2.826	3.148	2.968	2.828	3.042	2.9	2.814	2.786	2.744
ADRA2C	2.7755	2.4155	2.6105	2.6925	2.599	2.688	2.4555	2.3545	2.796	2.6095	2.5595	2.4425	2.74	2.5355	2.653	2.491	2.4665	2.58	2.6085	3.5	3.488	3.364	3.3485	3.3445	3.4265	3.403	3.422	3.4055	3.36	3.449	3.5675	3.2625	3.536	3.379	3.48	3.3975	3.7415	3.517	2.5495	2.7815	2.7745	2.579	2.658	2.882	2.6405	2.8035	2.938	2.627	2.5825
ADRB1	2.9855	3.2605	3.561	3.011	2.8355	3.7765	3.167	4.144	3.1705	2.9775	3.275	3.4395	3.3445	3.085	3.3305	3.0445	3.303	2.9375	2.955	4.031	4.3335	3.802	4.816	3.8585	4.194	3.733	4.428	4.3025	4.1615	4.083	3.8265	3.652	3.9445	3.485	4.6055	3.8265	3.775	4.175	3.552	2.971	3.4725	3.1315	2.6975	3.327	3.271	3.4565	3.3435	3.838	3.0225
ADRB2	9.023	9.706	9.521	9.07	9.619	7.864	9.925	9.855	9.199	9.635	9.389	9.752	9.263	9.363	9.399	9.021	9.185	9.257	9.829	10.355	10.07	10.553	10.022	10.717	9.752	10.142	10.381	10.48	9.893	9.918	10.35	10.187	10.932	9.965	10.232	9.908	9.463	10.161	10.213	9.487	9.975	9.739	9.84	9.568	9.872	9.438	9.663	9.848	9.805
ADRB3	2.708	2.562	2.4555	2.372	2.4295	2.3875	2.4845	2.379	2.617	2.7165	2.376	2.3415	2.379	2.488	2.492	2.5035	2.465	2.5945	2.525	3.4145	3.2415	3.3145	3.2945	3.225	3.1865	3.5675	3.487	3.2	3.2295	3.2185	3.361	3.325	3.391	3.393	3.292	3.1475	3.282	3.346	2.8745	2.5665	2.5715	2.677	2.6265	2.7525	2.784	2.6515	2.6015	2.9245	2.7485
ADRBK1	7.391	7.272	6.6765	6.9225	7.0605	6.98	7.0665	6.731	7.4585	6.8175	7.123	6.901	7.3905	6.9155	6.932	7.1845	6.581	6.9675	7.1275	6.5305	6.9825	6.5325	7.059	6.4645	7.4845	7.02	6.865	6.4395	7.329	7.2005	6.977	6.6025	6.6465	6.5895	6.933	7.1635	6.6275	6.9225	5.2155	6.7505	5.847	6.204	6.174	6.0935	5.6935	6.7055	5.6075	5.138	5.7175
ADRBK2	6.3948	6.6784	6.689	5.6362	6.6912	5.9708	6.1598	6.5422	5.8374	6.7324	6.0884	6.1782	6.2066	6.152	6.571	6.0654	6.526	6.3226	6.2522	7.1972	6.8808	7.0462	7.1798	6.933	7.2308	6.9364	7.055	6.8318	6.9014	7.046	7.1098	6.6586	6.5746	7.2302	7.1262	6.7144	6.4896	6.6878	5.8862	6.363	6.1846	6.779	5.8704	6.3762	5.1234	6.59	5.5714	5.6166	5.8104
ADRM1	6.576	6.537	6.36567	6.563	6.395	6.50433	6.27633	6.22633	6.824	6.39767	6.48	6.11933	6.69867	6.30733	6.451	6.30767	6.158	6.37667	6.57433	6.743	7.06833	6.73533	7.14567	6.89867	6.87967	6.85667	6.962	6.63367	7.157	6.91267	7.18267	6.78467	6.824	6.62367	7.073	6.883	6.97433	6.99367	5.531	6.47533	5.79767	6.20767	5.94767	5.99833	6.08567	6.202	5.78367	5.43533	5.46433
ADSL	5.1715	4.7745	5.122	5.706	4.898	5.222	4.952	5.0625	5.154	5.035	5.002	5.0385	5.1075	4.8835	5.141	4.8825	5.2195	5.211	4.7595	5.8195	5.934	6.112	5.8395	6.1145	5.8615	6.0885	5.8415	6.045	6.0975	5.8645	6.0565	6.0735	5.9635	5.897	6.044	5.917	5.772	6.0545	5.71	5.258	5.3195	5.212	5.2755	5.2545	5.4625	5.225	5.2695	5.389	5.1305
ADSS	8.19833	8.31433	8.17167	7.938	8.33767	7.125	8.02867	8.229	8.07833	8.057	8.033	8.348	8.04733	8.07167	8.30033	7.82033	8.05533	8.14967	8.18067	7.87467	8.26467	8.34233	8.204	8.32067	8.32233	8.29133	7.97733	8.36267	8.01367	8.10367	8.24133	8.16633	8.16833	8.12567	7.96667	8.03	8.059	7.80333	7.97767	8.07933	8.08033	8.33867	7.87833	8.067	7.72767	7.27833	7.54667	8.01967	8.087
ADSSL1	2.937	3.348	3.894	3.23	3.755	3.506	3.396	3.34	3.48	3.503	3.429	3.438	3.796	3.43	3.191	3.152	4.016	2.685	3.194	4.531	4.337	4.47	4.359	4.72	3.888	4.416	3.998	4.253	4.764	4.209	4.451	4.095	4.585	4.892	4.826	4.173	4.056	3.716	3.329	3.53	3.487	3.199	3.838	3.377	3.468	2.818	3.598	3.597	3.247
AEBP1	5.987	5.181	6.078	5.641	5.389	6.055	5.475	5.878	6.131	5.522	5.684	5.508	5.894	5.964	5.507	5.825	6.264	5.595	5.527	5.388	5.554	5.455	5.334	5.48	6.073	5.469	6.406	5.633	5.785	5.603	5.89	5.509	5.38	5.801	5.544	6.12	5.931	6.221	4.806	4.462	4.626	5.163	5.683	4.896	5.288	5.262	4.918	5.102	4.466
AEBP2	5.7224	5.1968	5.0822	5.1584	5.4264	5.3822	5.7792	5.6312	4.9264	5.1464	5.445	5.6502	4.854	5.756	5.2972	5.4788	5.611	5.7842	5.3684	6.0866	6.14	6.0096	5.6976	5.9084	5.781	5.934	6.0412	6.1208	5.7594	5.5998	5.8484	6.3572	6.4984	6.1828	5.9908	6.133	5.6324	5.8406	6.1632	5.4004	6.1806	5.9992	5.8486	5.9088	6.1898	5.4832	5.9124	6.5372	6.4554
AEN	7.48	6.932	7.513	7.67	6.748	8.005	7.547	7.777	7.653	7.489	6.957	7.43	7.347	7.269	7.465	7.247	7.546	7.078	7.254	8.818	8.727	8.588	8.401	8.869	8.556	8.421	8.645	8.46	8.745	8.787	8.986	8.646	8.787	8.512	8.876	8.646	8.512	8.515	8.069	7.589	7.358	7.788	7.291	7.617	7.71	7.611	8.397	7.372	7.749
AES	7.46867	7.17067	7.60233	7.713	7.15267	7.46733	7.34167	7.459	7.762	7.52067	7.261	7.354	7.558	7.311	7.655	7.32833	7.805	7.20133	7.39533	7.47967	7.74533	7.46067	7.264	7.72167	7.29467	7.67467	7.55133	7.47467	7.91467	7.66067	7.48967	7.47933	7.98467	7.222	7.68767	7.765	7.28433	7.40967	7.225	7.04167	6.64267	6.89367	6.99933	6.84467	7.65467	7.05033	7.19367	6.65233	6.84567
AFAP1	4.2165	4.40075	4.24525	4.004	3.751	3.64875	3.54725	4.1535	4.37375	3.9565	4.29475	3.74025	4.4115	3.423	4.261	3.767	4.02575	3.66875	4.15125	4.36325	4.47625	4.859	4.832	4.19275	4.7275	4.66875	4.41325	4.7345	4.35325	4.8955	4.0725	4.65475	4.177	4.376	5.036	4.9855	4.2595	3.628	3.64175	3.6315	3.181	3.74975	3.34425	3.529	3.61925	4.6025	3.84425	2.966	4.11675
AFAP1L1	2.43775	2.5175	2.631	2.63525	2.52725	2.57975	2.43175	2.3835	2.67375	2.461	2.62875	2.47175	2.6145	2.66	2.45525	2.50925	2.47025	2.41575	2.5175	3.04925	3.09	2.98275	2.9285	3.01275	3.07975	2.937	3.0375	3.047	3.044	3.03675	3.0485	3.09125	2.99175	3.03675	3.16675	3.0235	3.13275	3.16575	2.32375	2.345	2.344	2.26175	2.3915	2.44	2.37225	2.312	2.36975	2.46175	2.2805
AFAP1L2	3.28067	3.49533	3.68767	3.74267	3.54567	3.308	3.666	3.83867	3.59867	4.12167	3.516	3.66433	3.71667	3.932	3.67467	3.43467	3.674	3.63733	4.00167	4.31133	4.35733	4.058	3.659	3.88033	3.33233	4.231	3.827	3.83433	3.75633	3.671	3.774	3.84133	3.96867	3.88267	4.24733	3.64067	3.826	3.684	3.722	3.53533	3.42333	3.44233	3.39733	3.64433	3.28033	3.40067	3.49867	3.67767	3.68367
AFF1	6.372	6.7126	5.8652	6.508	6.2158	5.8764	6.3004	5.9554	6.1342	6.0488	6.2784	6.128	6.3266	6.323	6.2912	6.377	5.7924	6.403	6.149	6.2472	6.206	6.3212	6.796	5.9264	6.5228	6.3306	6.5532	6.375	6.3716	6.8148	6.4142	5.9838	6.1854	6.1426	5.9794	6.2614	6.4652	6.4866	5.173	5.584	6.2034	5.914	5.718	5.9538	5.6904	5.928	5.5266	5.5994	5.5098
AFF1 /// MLL	5.792	6.111	4.631	5.925	4.968	4.043	5.573	4.767	4.94	5.854	5.489	4.486	5.694	5.179	5.69	5.777	4.471	5.883	5.209	4.647	4.791	5.544	5.183	4.446	5.493	5.551	5.566	4.833	5.472	6.198	5.067	4.434	5.123	4.415	3.956	4.643	4.529	4.819	5.112	4.715	5.051	5.249	4.334	5.162	3.956	5.9	3.633	3.547	3.874
AFF2	1.97433	2.01733	1.98867	2.137	2.08833	2.17233	1.92067	2.002	2.108	1.94333	2.05333	1.86267	2.032	1.97133	1.95267	1.913	1.91333	1.936	2.09233	2.705	2.62333	2.634	2.66233	2.78767	2.71367	2.706	2.722	2.74267	2.63067	2.70233	2.84567	2.74867	2.76533	2.718	2.74967	2.669	2.69033	2.75367	2.254	2.21233	2.217	2.22333	2.24967	2.28933	2.31	2.276	2.346	2.38033	2.267
AFF3	4.2905	4.22875	4.496	4.00275	4.0005	4.9335	4.50975	5.05825	4.1495	4.9965	4.24975	4.81425	4.42325	4.306	4.4955	4.48875	4.88575	4.49725	4.40125	4.939	5.40525	4.95075	4.75825	5.44725	5.63475	5.49725	5.42575	5.55375	4.9115	4.96475	5.50625	5.42125	5.6045	5.87575	5.49725	5.1025	5.711	5.35525	5.02475	4.57775	4.58725	5.07475	4.70275	5.282	4.13275	4.46625	5.0155	4.80475	4.701
AFF4	4.78483	4.845	4.67033	5.046	4.87267	5.3205	4.73533	4.82183	4.8545	4.805	4.67233	4.70117	4.77733	4.63867	4.74933	4.762	4.70217	4.73417	4.84783	4.96017	4.89117	4.806	4.86783	4.88333	5.08367	4.88367	5.04333	5.07783	5.00333	4.9745	5.09817	4.88167	5.111	5.032	4.95217	4.91433	5.27167	4.97917	4.15333	4.63233	4.72183	4.6115	4.54217	4.61683	4.40233	4.71183	4.298	4.28283	4.4455
AFG3L2	6.082	5.826	6.179	6.047	5.895	5.467	5.698	6.045	6.008	6.017	5.705	5.774	6.008	5.879	6.126	5.595	6.378	5.613	5.984	6.321	6.306	6.578	6.163	6.277	5.981	6.018	6.025	6.084	6.291	6.23	5.781	6.001	6.093	6.041	6.094	6.556	5.909	5.534	5.025	5.336	5.098	5.578	4.715	4.992	4.328	5.471	4.745	4.764	4.508
AFM	2.038	1.997	2.355	2.379	2.087	2.042	2.045	2.175	2.205	1.994	2.084	2.245	2.251	2.469	2.391	2.423	2.277	2.303	1.896	2.676	2.697	2.705	2.758	2.833	2.775	2.614	2.763	2.993	2.652	2.946	2.768	2.917	2.818	2.792	2.802	2.724	2.842	2.955	2.404	2.426	2.426	2.523	2.438	2.382	2.746	2.486	2.612	2.511	2.579
AFMID	3.2	2.876	3.0655	3.4675	3.034	3.0385	2.973	2.8235	3.1995	2.845	2.9355	2.874	2.994	2.964	3.2105	3.032	3.1835	2.9035	3.0025	3.07	3.0495	2.899	2.9585	3.1235	3.046	2.982	3.067	2.935	3.178	3.058	2.972	3.064	2.9215	2.927	3.1085	3.059	3.0875	2.9855	2.606	2.7195	2.623	2.4665	2.717	2.712	2.491	2.5415	2.456	2.5875	2.547
AFP	2.1845	2.0055	2.0765	2.1035	1.931	2.1115	2.0155	2.013	2.1755	2.156	2.0575	2.048	1.9555	2.069	1.9735	2.151	2.0635	2.042	2.374	2.7515	2.649	2.4755	2.6135	2.602	2.637	2.6355	2.667	2.605	2.577	2.5415	2.698	2.5565	2.589	2.7595	2.6195	2.5695	2.6995	2.894	2.2625	2.2655	2.2545	2.2055	2.342	2.2985	2.556	2.339	2.199	2.318	2.334
AFTPH	8.63175	8.71625	8.80025	8.727	8.713	8.08025	8.6705	8.765	8.78975	8.6545	8.7625	8.7395	8.717	8.7235	8.70425	8.78025	8.6525	8.76825	8.783	9.0825	9.0755	8.86075	9.07425	9.088	9.30775	8.98025	9.14125	9.158	9.1275	9.12825	9.27875	9.054	8.985	9.0665	9.04225	9.1985	9.30675	9.18025	8.29875	8.84225	8.6645	8.70125	8.522	8.67675	8.22125	8.8565	8.84375	8.432	8.2635
AG2	2.832	2.807	2.767	2.86	2.8	4.514	2.963	3.434	2.674	3.319	2.755	2.884	3.059	2.895	3.204	2.583	2.724	2.864	2.856	3.95	3.531	3.69	3.775	3.43	3.618	3.294	3.858	3.585	3.757	3.617	3.723	3.616	3.539	3.78	3.915	3.525	3.635	4.176	3.722	3.284	2.943	2.935	3.053	2.846	3.071	3.052	3.305	3.146	3.202
AGA	6.9705	6.827	6.75825	6.6605	6.761	6.83575	6.97375	6.73875	7.0325	6.9935	6.85175	6.668	6.7555	6.37925	7.212	5.98175	6.79375	6.94975	6.7275	7.341	7.58175	7.217	7.116	7.74725	6.77125	7.609	6.95475	7.5585	7.51675	6.80875	7.191	7.3095	7.4825	7.442	7.58225	6.9545	7.19725	7.43375	7.3445	6.93025	7.0415	6.3305	7.26775	6.55675	7.397	6.68575	7.3445	7.3725	7.1875
AGAP1	2.86967	2.95867	2.708	2.88567	3.11867	3.22983	2.73017	2.78467	2.77333	2.70217	2.752	2.898	2.856	2.51483	2.765	2.76267	2.531	2.62717	2.95283	3.12767	3.45133	3.35817	3.452	3.26383	2.99467	3.36917	3.2285	3.31017	3.31633	3.24017	3.08433	3.185	3.974	3.066	3.20367	3.03683	3.11983	3.22267	3.15367	2.51367	2.61733	2.67083	2.47483	2.42833	2.6025	2.4835	2.52683	2.64317	2.48033
AGAP10 /// AGAP9 /// BMS1 /// BMS1P1 /// BMS1P4 /// BMS1P5 /// LOC642826	4.215	4.473	4.38	4.435	3.866	4.284	4.385	4.418	3.925	4.408	4.256	4.506	4.542	4.068	4.85	4.59	4.093	4.254	3.722	4.061	4.23	4.87	4.263	4.316	4.518	4.741	4.412	4.751	4.425	4.145	4.267	4.27	4.669	4.404	4.459	4.56	4.348	3.921	3.432	3.449	3.735	4.087	3.144	3.826	3.383	3.777	3.27	3.134	3.344
AGAP11	3.326	2.983	2.256	3.318	2.841	2.492	3.224	2.446	2.41	3.001	2.897	2.794	2.98	2.649	3.57	2.79	2.9	2.982	2.853	3.242	3.073	3.194	3.103	2.897	3.204	3.008	2.94	3.111	3.18	3.282	2.847	3.353	3.498	3.403	4.35	3.039	3.038	3.181	2.623	2.867	2.733	2.716	2.652	2.943	2.112	2.706	2.548	2.719	2.585
AGAP2	5.41	5.23433	5.05867	5.33133	5.01	4.96133	5.08267	5.017	5.35767	5.05467	5.22533	5.01267	5.27667	5.03	5.19033	5.103	4.96167	5.00567	5.05667	5.142	5.25467	5.15067	5.317	5.175	5.402	5.37967	5.367	5.14767	5.46433	5.34233	5.24667	5.10733	5.21833	5.04433	5.32767	5.54533	5.334	5.196	4.22833	4.51867	4.231	4.554	4.47167	4.55633	4.387	4.52233	4.295	3.75333	4.36033
AGAP3	4.158	3.95333	4.25233	4.072	4.149	4.171	3.917	3.97	4.165	3.95333	3.88367	3.776	4.27467	4.054	3.79267	3.944	3.996	4.01267	4.07533	4.722	4.46033	4.32	4.556	4.28733	4.40233	4.32867	4.43133	4.171	4.45567	4.721	4.54567	4.34033	4.41967	4.497	4.74167	4.46767	4.36367	4.551	3.1	3.621	3.22067	3.52333	3.197	3.20167	3.235	3.50533	3.35667	2.904	3.11533
AGAP4	6.562	6.895	6.044	6.543	7.148	7.374	6.435	6.199	6.597	6.063	6.843	6.839	6.548	6.727	6.294	6.444	6.33	6.676	7.095	7.057	7.619	7.054	6.683	6.66	6.391	6.844	7.019	6.59	7.157	7.118	7.169	6.653	6.829	7.016	7.119	7.527	7.231	7.304	6.18	6.584	6.325	6.138	6.94	6.399	6.564	6.213	6.911	6.266	6.228
AGAP4 /// AGAP7 /// AGAP8 /// LOC100294038	6.572	6.654	6.164	6.204	7.012	6.968	6.633	6.161	6.713	5.934	6.692	6.745	6.38	6.567	6.22	6.153	6.192	6.725	6.979	6.816	7.022	6.319	6.36	6.298	6.449	6.577	6.677	6.157	6.685	6.743	6.367	6.522	6.148	6.412	6.509	7.125	6.675	6.774	4.743	6.483	5.592	5.314	6.086	5.77	5.767	5.538	6.215	5.816	5.513
AGAP5	5.66	5.973	5.352	5.051	6.191	6.149	5.691	5.617	5.823	5.232	6.051	6.076	5.307	5.77	5.554	5.289	5.569	5.579	5.997	5.478	5.977	5.349	5.239	5.415	5.315	5.204	5.315	5.242	5.549	5.472	5.183	5.108	5.229	5.414	5.24	6.018	5.411	5.434	4.565	5.195	4.466	4.402	4.613	4.507	4.541	4.395	4.878	4.358	4.437
AGAP6 /// AGAP7	7.535	8.013	7.156	7.259	8.115	8.066	7.604	7.454	7.656	7.287	7.914	7.78	7.465	7.683	7.409	7.439	7.407	7.757	8.282	7.885	8.357	7.784	7.571	7.438	7.445	7.719	7.876	7.665	7.914	7.957	7.696	7.671	7.572	7.551	7.476	8.081	7.794	7.991	7.096	7.909	7.364	7.111	7.811	7.034	7.623	7.227	7.475	7.215	7.044
AGBL1	2.479	2.647	2.6725	2.8705	2.688	2.7705	2.4795	2.7145	2.696	2.569	2.7125	2.692	2.786	2.563	2.6875	2.6475	2.59	2.664	2.631	3.2625	3.0985	3.16	3.22	3.1085	2.94	3.0845	3.1045	3.168	3.1165	3.0665	3.118	3.035	3.151	3.0605	3.2225	3.035	3.143	3.2775	2.6715	2.55	2.5465	2.7455	2.6465	2.718	2.5165	2.604	2.754	2.752	2.6435
AGBL2	2.5785	2.56225	2.72175	2.837	2.6715	2.845	2.6115	2.73575	2.7455	2.52525	2.3675	2.5085	2.738	2.6535	2.48975	2.4645	2.838	2.68475	2.38725	3.4365	3.7765	3.23875	3.17575	3.728	3.272	3.36525	3.164	3.31625	3.1775	3.06	3.5045	3.49625	3.24875	3.3085	3.5325	3.22775	3.50825	3.0965	3.08075	2.44575	2.755	2.682	3.039	2.641	3.13675	2.51975	3.2495	3.05925	2.82575
AGBL3	2.701	2.044	2.05	3.695	2.425	2.171	1.836	2.328	2.105	2.046	2.04	2.039	2.021	2.638	2.153	2.072	1.962	2.028	1.945	2.747	2.819	2.926	2.902	2.821	2.837	2.791	3.081	2.921	3.081	2.76	3.267	2.998	3.023	3.329	2.738	2.905	4.039	3.015	2.39	2.349	2.827	2.531	2.4	2.326	2.444	2.448	2.439	2.204	2.488
AGBL4	2.741	2.75933	2.61133	2.935	2.63033	2.78633	2.55167	2.84667	2.83233	2.77633	2.718	2.603	2.73967	2.60067	2.64767	2.72467	2.734	2.598	2.615	3.33533	3.13733	3.22933	3.28	3.341	3.40033	3.29433	3.435	3.47833	3.203	3.36567	3.308	3.398	3.26833	3.25567	3.40067	3.20033	3.48833	3.448	2.425	2.72433	2.46833	2.346	2.52667	2.52667	2.54433	2.43533	2.489	2.64567	2.49133
AGBL5	3.357	3.3945	3.787	3.5245	3.3585	4.334	3.5575	3.56	3.4095	4.028	3.409	3.705	3.5275	3.288	3.728	3.662	3.853	3.919	3.698	3.9005	3.906	3.8955	3.8035	4.091	3.759	4.3835	3.8665	3.661	4.0295	3.928	3.8825	3.8615	3.944	4.1635	4.0975	3.735	3.8015	4.073	3.2715	2.943	3.107	3.058	3.1495	2.9935	3.1495	3.21	3.266	3.2245	3.176
AGER	6.0517	6.0816	6.0957	6.1706	6.1095	6.1747	5.8867	5.8128	6.7218	5.7761	5.8977	5.7569	6.1696	5.9203	5.9089	5.8051	5.5502	5.8916	5.7407	5.595	6.1802	5.5501	5.7664	5.6941	6.0767	6.0836	5.9541	5.621	6.2456	6.0853	6.1796	5.9478	5.715	5.6729	5.9547	5.9889	5.8966	6.3553	4.4553	5.2044	4.6879	5.0978	5.1631	5.0577	4.9388	5.3602	4.9474	4.7993	4.9281
AGFG1	6.71183	6.689	6.73433	6.13333	6.90383	7.43467	6.60467	6.98417	6.40783	6.4855	6.63683	6.963	6.43617	6.97167	6.30717	6.80217	6.92383	6.7615	6.76067	7.51833	7.676	7.64933	7.513	7.5175	7.84083	7.71567	7.58367	7.544	7.18817	7.29833	7.2905	7.87917	7.3075	7.63783	7.3465	7.49917	7.36683	7.56483	7.43033	7.06917	7.6065	7.19367	7.49483	7.25967	7.42983	7.22833	7.11033	7.49767	7.697
AGFG2	4.8114	4.9672	4.7316	5.0546	4.7098	3.993	5.193	4.9538	4.808	4.8278	4.7066	4.875	5.0278	4.5486	5.1092	4.663	4.792	4.4496	4.8464	5.1914	5.3082	5.1576	5.0798	5.1038	4.8268	5.4844	5.1682	5.269	5.4372	5.0926	5.0878	5.0226	5.6832	4.9224	5.35	5.1784	5.0662	4.8368	4.5562	4.581	4.2784	4.6064	4.4118	4.7512	4.455	4.9064	4.531	4.3124	4.3896
AGGF1	4.73671	4.70529	4.58914	4.343	4.83286	4.128	4.91743	4.79386	4.28071	4.58443	4.60586	4.98314	4.31514	5.03157	4.74729	4.62414	4.80671	4.90957	4.63071	5.20586	5.52171	5.422	5.246	5.25871	5.22029	5.23786	5.35386	5.41443	5.16586	5.19	5.23343	5.50643	5.31043	5.46443	5.133	5.35157	4.88829	5.11986	5.40129	4.40486	4.94557	4.79514	4.84514	4.645	4.97357	4.43643	4.68686	5.22071	5.06086
AGK	3.92433	3.90867	3.952	4.02733	3.966	3.88567	4.22767	3.813	3.93833	4.25633	3.895	4.19933	3.905	3.85967	4.07833	3.89567	3.987	4.081	4.058	3.981	4.21133	4.297	4.22533	4.38133	4.14733	4.283	4.24833	4.36933	4.143	4.03767	4.20767	4.24267	4.64	4.34433	4.32167	4.284	4.264	4.09867	4.669	3.98	4.071	3.90867	3.81533	3.978	3.859	4.056	3.867	4.27567	4.02167
AGL	4.795	4.34367	4.385	4.373	4.41967	4.781	5.169	4.82733	4.41967	4.159	4.362	4.787	4.34233	4.718	4.57733	4.71733	4.521	4.64	4.35	5.37733	5.6	5.51467	5.08167	5.39033	5.332	5.435	5.40233	5.368	5.19733	5.221	5.001	5.63233	5.82633	5.652	5.09633	5.364	5.05033	5.465	5.58733	4.673	5.77067	4.95133	5.30567	5.102	5.7	4.57567	5.22767	5.617	5.86467
AGMAT	3.5805	3.321	3.778	3.442	3.357	3.492	3.5575	3.5435	3.9025	3.943	3.2205	3.491	3.9945	3.731	3.5685	3.611	3.8195	3.291	3.1715	4.5595	5.032	4.32	4.4475	4.803	4.279	4.5085	4.6025	4.1325	4.5955	4.099	4.306	4.631	4.581	4.7805	4.52	4.605	4.121	4.08	4.053	3.195	3.1745	3.208	3.5835	3.399	3.8435	3.1175	3.9395	3.3865	3.461
AGPAT1	5.2145	5.22075	4.82	5.09425	5.12175	4.9365	4.99125	5.0315	5.49275	5.01725	5.29575	5.467	5.48275	5.0875	5.489	5.1945	4.7505	5.13075	5.43725	4.8355	4.48975	4.557	4.97525	4.4845	4.7825	4.63575	4.744	4.5435	4.7005	5.07	4.93225	4.48525	4.714	4.5695	4.64975	4.6045	4.8785	4.80425	4.39575	4.3055	4.113	4.16075	4.67625	4.478	4.46	4.494	4.5065	3.82625	4.19775
AGPAT2	4.9815	4.9	5.0255	4.7815	5.1375	4.6025	4.8905	4.6415	4.639	5.2835	4.986	4.7835	5.2045	4.977	4.7065	4.822	4.974	4.719	4.821	4.9035	4.7425	4.476	4.7635	4.605	4.9965	4.6965	4.977	4.446	4.808	4.938	4.7015	4.6625	4.5875	4.4515	4.937	4.7655	4.7635	4.7395	3.408	3.9835	3.63	3.37	3.6215	3.7305	3.689	3.767	3.4625	3.1605	3.1915
AGPAT3	5.186	5.13986	5.11343	5.30557	5.16671	5.05129	5.075	4.89114	5.017	5.24857	4.961	4.848	5.35043	4.92571	4.98471	4.79814	4.93443	4.91514	4.867	5.65414	5.24029	5.73029	5.63071	5.35186	5.37629	5.54286	5.47014	5.05714	5.59271	5.42986	5.39343	5.29429	5.42786	5.26186	5.50929	5.196	5.00314	5.18771	4.11029	4.30729	4.15471	4.54043	3.95414	4.35443	3.96714	4.71871	4.10686	3.95614	3.95871
AGPAT4	3.46113	3.61713	3.32088	3.40775	3.59612	3.2025	3.56588	3.366	3.78963	3.687	3.19912	3.44888	3.54462	3.42437	3.6285	3.468	3.44475	3.38275	3.63362	4.18013	4.00713	3.93012	3.872	3.9875	3.6995	3.84325	3.88225	3.852	3.72938	3.78662	3.97637	3.77237	4.1365	3.79125	3.82737	3.68575	3.8025	3.88238	3.04438	3.23325	3.39075	3.28512	3.27712	3.39675	3.26337	3.35012	3.12938	3.13388	2.99213
AGPAT5	5.604	5.36125	5.65725	4.8755	5.3945	4.794	5.94325	6.18675	5.271	5.91425	5.46225	5.91775	5.34925	5.691	5.69225	5.51225	6.18075	5.6665	5.7515	6.02	6.6055	6.28775	6.0605	6.641	6.39025	6.26325	6.39725	6.687	5.96525	5.942	6.4535	6.573	6.44275	6.68725	6.11875	5.978	6.1145	6.17025	6.91525	5.876	6.203	6.22625	6.1005	6.226	5.95725	5.14	6.44075	6.565	6.3705
AGPAT6	6.21	5.973	6.287	6.101	6.258	6.3155	5.891	6.282	6.088	6.2595	6.4065	6.2845	6.336	5.8185	6.1295	5.883	6.189	5.938	6.4455	6.689	6.5085	6.504	6.8825	6.68	6.7	6.5325	6.665	6.841	6.812	6.677	6.8935	6.3525	6.627	6.475	6.8655	6.459	6.5775	6.265	5.1285	5.6725	5.4545	5.8145	5.5515	5.7735	5.2935	6.199	5.5135	5.4235	5.373
AGPAT9	9.212	9.654	8.722	8.964	9.564	8.596	9.086	8.833	9.279	8.698	9.237	9.329	9.103	9.513	8.845	9.556	8.798	9.26	9.246	9.628	9.282	9.329	9.967	9.22	10.483	8.936	9.909	9.516	9.534	9.809	9.967	9.118	8.54	9.49	9.405	9.831	10.374	9.353	8.228	9.315	8.874	9.449	8.977	9.004	8.242	9.356	8.134	9.115	9.104
AGPHD1	2.40225	2.2625	2.48	2.4825	2.3335	2.78325	2.3665	2.38875	2.55175	2.332	2.4405	2.24575	2.71875	2.37075	2.442	2.57975	2.5015	2.51575	2.674	3.19775	3.2525	3.11575	3.10425	3.34025	3.158	3.14725	3.0765	3.40625	3.19525	3.08525	3.089	3.36375	3.253	3.049	3.11875	3.16725	3.3605	3.20075	3.05425	2.5535	2.66125	2.65775	2.62625	2.77	2.6975	2.48125	2.72425	2.70275	2.56525
AGPS	6.0484	5.9968	6.4784	5.9322	6.315	6.027	6.3894	6.5636	5.7512	6.2528	6.2128	6.3514	6.0458	6.482	6.2754	5.9028	6.5696	6.2658	6.1454	6.8628	6.8164	6.9296	6.7554	7.0644	6.4494	6.656	6.5034	6.7456	6.805	6.5224	6.5852	6.8014	6.64	6.809	6.7846	6.4772	6.3118	6.5778	6.5696	6.5688	6.8004	6.3332	6.6346	6.5208	6.5788	6.1494	6.4756	6.6844	6.7406
AGR2	2.35075	2.169	2.37	2.35275	2.17675	2.513	2.26125	2.254	2.31375	2.36875	2.3815	2.22325	2.2175	2.29975	2.2975	2.2565	2.1875	2.2515	2.23925	3.0495	3.01575	2.93725	2.98175	2.9455	2.9655	3.1415	2.97475	2.9805	2.9795	3.019	3.0895	3.0735	3.039	3.05925	3.0065	2.93875	3.23175	3.139	2.52225	2.45625	2.56175	2.3525	2.41875	2.44225	2.4575	2.4095	2.40525	2.5415	2.4685
AGR3	1.883	2.058	2.055	1.937	1.995	2.106	1.902	2.107	2.012	1.835	2.036	2.084	1.772	2.146	1.979	1.874	2.009	2.005	2.228	2.53	2.693	2.535	2.714	2.719	2.701	2.631	2.656	2.561	2.556	2.571	2.5	2.718	2.745	2.604	2.722	2.537	2.736	2.568	2.183	2.307	2.397	2.174	2.433	2.35	2.215	2.169	2.386	2.613	2.152
AGRN	4.8225	4.7305	5.066	5.2945	4.724	4.8745	5.072	4.461	4.927	5.3525	4.4845	4.694	5.091	4.7965	4.635	4.4745	4.967	4.4995	4.918	5.116	4.797	5.1285	4.784	4.977	4.9235	4.99	5.1865	5.095	5.557	5.6985	4.983	4.882	5.833	5.3085	5.2035	5.3325	5.2565	4.8105	4.4955	4.101	4.246	4.243	4.9725	4.6205	5.2985	4.669	4.107	4.1765	4.2655
AGRP	2.6975	2.785	2.727	2.7365	2.786	2.858	2.622	2.65	2.9875	2.6315	2.7565	2.6985	2.972	2.944	2.7895	2.69	2.74	2.6725	3.1735	3.3345	3.073	3.173	3.008	3.1625	3.1315	2.9815	3.2655	3.0835	3.158	3.3665	3.2105	3.192	3.094	3.137	3.41	3.1685	3.0985	3.0585	2.344	2.3985	2.3165	2.387	2.305	2.548	2.503	2.5755	2.3935	2.279	2.3555
AGT	3.0795	2.6985	2.5695	2.9555	2.69	2.557	2.6505	2.559	2.616	2.689	2.6085	2.619	2.544	2.5885	2.5985	2.615	2.6415	2.6255	2.5775	2.996	2.962	2.871	2.968	2.8925	3.03	2.877	2.921	3.0945	3.0315	3.32	3.148	3.0515	2.973	2.9915	3.229	3.1655	3.2565	3.133	2.2235	2.526	2.294	2.2975	2.1665	2.4805	2.413	2.21	2.4405	2.356	2.3275
AGTPBP1	6.88133	7.04367	6.66	6.33433	7.29433	7.70533	6.858	6.70733	7.09633	6.688	7.17933	6.77567	6.53167	7.16067	6.726	7.339	6.37233	6.91367	6.77967	7.286	7.46233	7.29233	7.42533	6.72367	7.73867	6.92767	7.207	7.33833	6.92567	7.28667	7.287	7.728	6.749	7.364	7.00233	7.215	7.573	7.454	7.38633	7.21767	7.52733	6.827	7.21567	7.18567	6.83933	6.717	7.466	7.56367	7.44733
AGTR1	1.862	2.0765	1.9735	2.3845	2.1555	2.1565	1.976	2.0685	2.2075	1.9345	2.1225	1.9675	1.962	1.9735	1.9715	1.875	2.1015	1.9825	2.01	2.611	2.6985	2.7305	2.6925	2.722	2.6075	2.7375	2.851	2.895	2.526	2.7155	2.655	2.82	2.672	2.565	2.687	2.629	2.663	2.717	2.103	2.1495	2.211	2.25	2.391	2.068	2.1625	2.116	2.2515	2.222	2.1105
AGTR2	1.8495	2.12	1.997	2.1255	2.04	2.094	1.908	1.908	2.0155	1.9065	2.045	1.988	1.905	1.981	2.0035	1.921	2.0345	2.0855	1.9445	2.603	2.646	2.6665	2.648	2.6215	2.5275	2.6075	2.712	2.6145	2.6115	2.6555	2.5985	2.6485	2.712	2.491	2.5685	2.645	2.6145	2.497	2.351	2.1135	2.2005	2.203	2.265	2.15	2.1675	2.191	2.191	2.0895	2.1035
AGTRAP	6.9725	6.9545	6.571	6.3085	6.7515	6.22425	6.53025	6.058	6.897	6.36125	6.6445	6.24625	7.02675	6.64375	6.08875	6.4955	6.37175	6.3945	6.52375	6.59825	6.4425	6.221	6.88175	6.09225	7.162	6.2465	6.64825	5.91475	6.909	6.69925	6.33775	6.37875	5.8165	6.049	6.38125	6.63275	6.35375	6.4825	4.83875	6.11975	5.87675	5.61025	5.875	5.498	5.4685	6.49925	5.49925	4.7525	5.7365
AGXT	2.40367	2.19067	2.17	2.683	2.12967	2.436	2.14367	2.41067	2.33933	2.21067	2.19333	2.13033	2.23433	2.25533	2.06467	1.96033	2.17067	2.16967	2.32067	2.835	2.712	2.70667	2.80533	2.97367	2.79833	2.75033	2.83667	2.838	2.70533	2.81167	2.91333	2.90433	2.843	2.92033	3.04333	2.82	3.033	3.051	2.25567	2.334	2.37167	2.26933	2.29267	2.46967	2.37467	2.349	2.33667	2.33667	2.245
AGXT2	2.818	2.1515	2.3795	2.462	2.325	2.5105	2.4685	2.334	2.6295	2.609	2.392	2.3575	2.252	2.201	2.37	2.393	2.2365	2.2405	2.2655	2.984	3.052	2.9985	2.907	2.9005	3.047	2.8265	3.002	3.0265	2.9105	3.007	2.8185	3.003	2.8975	2.8095	2.91	3.003	2.9495	3.1895	2.3995	2.383	2.468	2.415	2.628	2.3465	2.6365	2.441	2.484	2.5065	2.447
AGXT2L1	2.1005	2.1625	2.0945	2.243	2.1795	2.3875	2.036	2.153	2.0765	2.0655	2.071	2.0465	2.1625	2.1695	2.0765	2.131	2.1345	2.0855	2.1905	2.661	2.75	2.6725	2.721	2.7815	2.67	2.7815	2.7145	2.864	2.658	2.8115	2.6535	2.8825	2.7115	2.5695	2.6815	2.7145	2.823	3.052	2.338	2.125	2.2875	2.236	2.2955	2.2495	2.3535	2.183	2.27	2.4205	2.197
AGXT2L2	6.904	6.539	6.781	7.149	6.665	6.709	6.773	6.625	7.019	6.676	6.502	6.656	6.981	6.602	6.428	6.491	6.813	6.555	6.589	6.561	6.728	6.551	6.787	6.648	6.821	6.796	6.815	6.292	6.979	6.373	6.963	6.787	6.292	6.547	7.119	6.95	6.742	7.381	5.607	6.185	6.263	6.466	6.422	6.748	6.073	6.601	6.163	6.12	5.745
AHCTF1	7.068	7.3665	7.2035	7.1505	7.7835	8.0915	7.636	7.328	7.517	7.1975	7.7555	7.5195	7.047	7.6265	7.2455	7.4305	7.23	7.419	7.569	8.105	8.2045	8.0915	8.2195	7.815	8.228	7.8715	8.13	8.113	7.786	8.259	8.1375	8.5525	7.683	8.4115	7.938	8.4145	8.493	8.2875	8.445	8.07	7.8275	7.6625	8.261	7.8225	7.813	7.337	7.7585	8.3705	8.4145
AHCY	6.09033	5.73233	6.03633	5.63233	5.70467	6.00533	5.80167	5.809	6.10567	6.04533	5.59867	5.86333	6.012	5.91967	5.79367	5.64633	6.05733	5.72367	5.81467	6.362	6.541	6.29767	6.588	6.65	6.20833	6.576	6.51867	6.369	6.56867	6.26733	6.56767	6.324	6.087	6.30567	6.42167	6.35567	6.42	6.512	6.196	5.75767	5.81867	5.55267	5.918	5.529	6.334	5.89	6.06833	5.60433	5.73867
AHCYL1	6.86717	6.87383	6.68483	6.62017	6.90983	5.94233	6.75783	6.8015	6.6475	6.78767	6.71967	6.7955	6.979	6.50767	6.83367	6.68667	6.77517	6.61067	6.83383	6.60133	6.4625	6.54033	6.83417	6.631	6.8825	6.79467	6.6955	6.77033	6.84933	6.78383	6.67367	6.444	6.4385	6.52717	6.68067	6.67517	6.85833	6.47617	5.9865	6.50517	6.32817	6.60867	5.9815	6.51517	5.79667	6.7615	5.96883	5.9815	6.0705
AHCYL2	5.77	5.7535	5.7405	5.443	5.8665	5.5845	5.515	5.5795	5.6445	5.509	5.4195	5.88	5.6185	5.3345	5.527	5.443	5.865	5.733	5.5545	6.2625	6.228	6.279	6.457	6.5675	6.2025	6.175	6.485	6.282	6.354	6.2625	6.498	6.5975	6.356	6.3235	6.708	6.3575	6.293	6.0725	5.295	5.6415	5.083	5.6605	5.146	5.4375	5.049	5.81	5.43	5.11	5.403
AHDC1	3.1	3.088	3.337	3.81	3.508	3.236	3.194	3.166	3.32	3.091	3.162	3.297	3.482	2.929	3.012	3.342	3.211	3.251	3.082	3.659	3.345	3.366	3.59	3.8	3.471	3.649	3.79	3.057	3.847	3.886	3.791	3.476	3.536	3.594	3.727	3.729	3.563	3.44	2.455	2.947	2.441	2.814	2.691	2.726	2.513	2.905	2.87	2.702	2.787
AHI1	4.5015	3.772	4.48275	4.55225	4.17375	4.47625	4.86775	4.5715	4.37475	4.79425	4.84825	4.88625	4.04275	4.3885	4.90425	4.8405	4.68925	4.90275	4.09	5.032	4.58875	5.32225	4.732	5.10025	5.13175	4.79925	4.83475	5.37425	4.65525	4.65925	4.6655	5.568	5.63675	5.3585	4.9455	4.93325	4.72575	4.92575	5.1305	4.936	5.214	4.16875	4.787	4.73575	4.0725	4.4015	4.56625	4.9045	4.34875
AHNAK	8.6855	9.0285	8.8965	8.737	8.967	9.0595	8.6915	8.929	8.779	8.922	8.769	8.576	8.884	8.6405	8.8705	8.193	9.1345	8.629	8.704	9.693	9.585	9.555	9.6225	9.627	9.2685	9.5035	9.335	9.545	9.5105	9.4375	9.5415	9.616	10.025	9.4755	9.469	9.4355	9.459	9.2665	9.0265	9.0005	9.44	9.011	9.008	9.367	9.321	9.332	8.99	8.7185	8.657
AHNAK2	3.54233	3.37267	3.65	3.42033	3.65433	3.57233	3.465	3.48267	3.66167	3.78333	3.513	3.53067	3.623	3.71433	3.52533	3.389	3.60433	3.75367	3.79233	4.17467	4.27867	4.078	4.163	4.358	4.09867	4.432	4.36367	4.253	4.49133	4.22267	4.38933	4.31267	4.06767	4.34133	4.489	4.375	4.35033	4.30533	3.24467	3.335	3.285	3.68367	3.27567	3.34233	3.19	3.19233	3.19	3.22867	3.15067
AHR	7.72133	7.61067	7.78733	6.64667	7.65167	8.34167	7.666	7.78767	6.98733	7.197	7.24333	7.508	7.058	7.57867	7.63967	7.20833	8.12433	7.93633	7.603	8.97933	8.403	8.883	8.11533	8.29733	8.09267	8.246	8.18933	7.99033	8.06567	8.503	8.39067	8.39167	8.117	8.19167	8.41667	8.32867	8.16567	8.44733	8.08967	7.844	8.285	7.64333	8.233	7.91967	7.835	8.013	8.053	7.441	7.76367
AHRR	2.7435	2.9865	2.364	2.687	2.6615	2.6365	2.502	2.535	2.7405	2.771	2.622	2.629	2.732	2.623	2.797	2.4125	2.361	2.7205	2.5745	3.4665	3.0835	3.2645	3.1795	2.992	3.1895	3.1305	3.294	3.1515	3.1455	3.091	3.3935	3.212	3.1605	3.2205	3.2085	3.184	3.0555	3.096	2.5195	2.638	2.491	2.3755	2.529	2.5205	2.658	2.5815	2.5485	2.6125	2.6145
AHSA1	7.6	7.47467	7.496	7.56967	7.26733	6.60367	7.52233	7.619	7.589	7.56333	7.443	7.56433	7.55767	7.57333	7.51833	7.549	7.68467	7.31067	7.661	7.32867	7.624	7.33167	7.64533	7.684	7.50167	7.57967	7.579	7.613	7.86267	7.57767	7.84067	7.54233	7.709	7.48667	7.62233	7.63933	7.42833	7.70033	7.142	7.294	6.778	7.08267	7.03967	7.09367	6.741	7.51967	6.905	6.842	6.557
AHSA2	6.9185	6.536	6.765	6.8205	6.6095	6.992	7.1095	6.677	6.8175	6.6215	6.8065	6.9805	6.8295	6.782	6.9015	6.5375	6.6185	6.4965	6.4535	7.5965	7.1715	7.148	7.284	7.497	7.188	7.4675	7.5375	7.2535	7.617	7.5655	7.4505	7.1725	7.4405	7.155	7.375	7.495	6.9395	6.954	7.011	6.6655	7.555	6.841	6.9055	6.975	6.7855	7.0455	6.879	7.208	6.749
AHSG	2.296	2.435	2.566	2.608	2.3165	2.664	2.344	2.5985	2.5585	2.5745	2.31	2.4355	2.417	2.7485	2.3595	2.2655	2.545	2.498	2.765	2.938	2.9725	2.974	3.1535	3.0065	2.8885	2.956	3.044	2.993	3.12	3.019	3.0325	3.122	3.0435	2.9745	3.1525	3.141	3.0875	3.1965	2.5775	2.7165	2.6345	2.4655	2.4985	2.587	2.7615	2.636	2.6255	2.4855	2.471
AHSP	6.598	6.407	8.387	6.225	5.95	7.348	6.213	5.585	6.631	9.201	7.183	4.658	7.44	7.119	7.916	8.331	6.357	9.058	5.83	9.477	4.921	9.562	6.449	6.693	7.638	8.071	6.849	8.575	6.357	8.23	6.643	9.705	7.461	7.329	6.245	6.973	4.697	5.727	6.279	8.06	7.456	7.046	7.929	7.717	7.348	7.212	8.591	7.302	8.007
AICDA	2.50575	2.6695	2.48225	2.70725	2.36725	2.7585	2.52975	2.4605	2.62	2.699	2.61125	2.4095	2.56075	2.35875	2.513	2.585	2.5445	2.61625	2.50625	3.1405	2.896	3.009	2.96675	2.889	2.9405	2.99875	3.039	3.07	3.0265	3.10425	3.0285	3.11575	3.1035	2.99275	2.97525	3.04075	3.03025	3.0685	2.609	2.52125	2.56475	2.47075	2.521	2.56375	2.42475	2.593	2.44775	2.4275	2.57675
AIDA	7.34425	6.997	7.41175	6.98	7.12	7.14575	7.463	7.5285	6.99025	7.44525	7.12025	7.4245	7.01525	7.2555	7.26	7.516	7.4035	7.55325	6.99775	8.22425	8.14875	8.58175	7.7765	8.17625	8.01975	8.0555	8.0455	8.3975	7.9375	8.1595	8.0675	8.4805	8.2195	8.31825	7.86675	7.952	7.8985	8.014	7.73975	7.423	7.764	7.718	7.48625	7.7305	7.73625	7.20075	7.76725	7.725	7.8165
AIDA /// LOC646890	6.2475	6.1435	6.2295	6.3	6.0655	6.034	6.202	6.3225	6.306	6.731	6.04	6.284	6.3945	6.2275	6.6245	6.799	6.3435	6.5725	5.9685	7.343	6.3945	7.182	6.278	6.583	6.9565	6.7615	6.747	7.032	6.59	6.6645	6.6965	6.8935	6.8015	6.8015	6.1875	6.4415	6.2845	6.389	5.945	6.1695	6.0845	6.5815	6.1205	6.107	6.1775	6.0855	6.5045	5.751	5.977
AIF1	9.3118	9.3068	9.6282	9.172	9.2384	9.1452	9.0806	9.0842	9.501	9.1934	9.3246	9.0264	9.5094	9.0968	9.1654	9.0046	9.3544	8.9708	9.0174	9.701	9.7832	9.5376	9.6896	9.6464	10.051	9.6204	9.7616	9.4812	9.7442	9.7184	9.7766	10.101	8.8128	9.5414	9.6676	9.4816	9.7366	10.1132	9.04	9.4112	9.5436	9.149	9.5248	9.4944	9.424	9.3228	9.7106	9.4662	9.4252
AIF1L	2.4724	2.3304	2.3442	2.3204	2.399	2.5626	2.2864	2.3208	2.2056	2.375	2.2914	2.2714	2.3372	2.2978	2.2598	2.2212	2.3282	2.3258	2.3034	2.944	2.944	2.9506	2.9202	2.961	2.8694	3.0206	2.915	2.8742	2.9344	2.9174	2.8594	2.8928	2.8486	2.7858	3.08	2.9308	3.0266	2.928	2.2634	2.5042	2.3174	2.3358	2.3668	2.495	2.3908	2.4064	2.381	2.418	2.2836
AIFM1	7.285	7.237	7.5	7.318	7.311	6.674	7.109	7.347	7.495	7.382	7.196	7.636	7.462	7.182	7.166	6.927	7.541	7.171	7.228	7.395	7.413	7.434	7.377	7.778	6.907	7.461	7.109	7.289	7.76	7.095	7.3	6.956	7.39	7.259	7.511	7.237	7.289	7.519	6.456	6.648	6.599	6.852	6.728	6.998	6.575	7.027	6.611	6.461	6.321
AIFM2	3.96325	3.9755	4.02075	3.916	3.60575	3.74575	4.17725	3.81775	3.858	3.93375	3.7975	3.82125	3.81225	3.8155	3.905	4.0965	4.0715	3.94225	3.8975	4.516	4.87	4.6615	4.77125	4.82625	4.17425	4.6035	4.42675	4.82175	4.427	4.42225	4.6255	4.23075	4.9925	4.507	4.6045	4.6475	4.54	4.2115	3.73025	3.66975	3.81	3.7425	3.571	3.6785	3.84025	3.68875	3.457	3.65	3.36975
AIFM3	2.7405	2.916	2.9105	2.6115	3.028	3.1495	2.67	2.947	2.741	3.0205	2.9355	2.657	3.083	2.8785	2.9775	2.525	2.851	2.9025	2.8975	3.2385	3.6745	3.919	3.4435	3.5665	3.61	3.473	3.5385	3.2725	3.832	3.335	3.602	3.4295	3.4335	3.229	3.543	3.381	3.127	3.362	2.6245	2.7605	2.403	2.5535	2.973	2.83	2.844	2.9575	2.7305	2.76	2.615
AIG1	4.856	5.0995	4.9345	4.9975	5.1645	5.1035	5.555	4.8425	5.0095	5.933	5.3675	5.309	4.9645	5.131	5.6675	5.2555	4.887	5.498	5.3135	5.568	5.2735	5.356	5.6185	5.0055	5.86	5.5645	5.3865	5.904	5.51	5.654	5.4545	5.33	5.6525	5.8615	4.864	5.095	5.5355	5.2855	4.7875	4.6485	5.0745	4.952	5.226	4.9565	4.443	4.894	4.3995	4.7305	4.8845
AIM1	7.31467	7.38467	7.248	7.34367	7.39067	7.5	7.45933	7.301	7.26467	7.236	6.993	7.27067	7.35667	7.24167	7.41567	7.48	7.271	7.37433	7.17267	7.67033	7.665	7.65467	7.7	7.38	8.096	7.683	7.89733	7.82633	7.92533	7.874	7.72333	7.42833	7.86067	7.73867	7.65333	7.65733	7.77833	7.36367	6.53533	7.12167	6.87033	7.30467	6.72	7.34267	6.482	7.349	6.839	6.80167	6.91433
AIM1L	3.267	2.696	2.693	2.447	2.522	2.369	2.833	2.583	2.625	2.61	2.39	2.783	2.609	2.447	2.953	2.24	2.284	2.483	2.549	3.447	3.231	3.257	3.328	3.427	3.477	3.228	3.199	3.485	3.385	3.686	3.265	3.649	3.187	3.379	3.48	3.35	3.253	3.161	2.362	2.494	2.443	2.401	2.45	2.29	2.825	2.53	2.395	2.546	2.394
AIM2	6.7325	7.0585	6.311	7.151	6.339	6.233	7.4115	6.3635	6.961	7.027	6.7545	6.4725	7.291	6.8785	6.2335	6.3105	6.6015	6.9895	6.9175	6.6825	7.5325	7.609	8.717	7.171	7.866	7.3555	8.2585	7.7245	7.1705	7.8285	6.779	8.214	7.997	7.675	6.3125	6.784	6.982	7.5265	7.85	6.4055	8.155	6.7025	7.8615	6.949	7.549	6.217	7.126	7.325	7.28
AIMP1	6.4336	6.4958	7.049	6.4812	6.734	7.074	6.5708	6.8972	6.374	6.8856	6.964	6.9652	6.6976	6.6378	6.51	6.8364	7.2248	6.6338	6.522	7.1816	7.5756	7.5154	7.0884	7.5348	6.9488	7.7034	7.2364	7.5556	7.0488	6.827	7.1016	7.8066	7.2118	7.6482	7.8422	7.072	7.249	7.139	7.9294	6.8758	7.4028	7.218	7.4386	7.131	7.5246	6.3796	7.4038	8.0078	7.7378
AIMP2	7.114	7.1375	7.089	6.9405	7.1555	6.3325	7.1335	6.992	6.889	7.478	6.8965	6.9535	7.2385	6.9015	7.048	6.754	7.4575	7.028	6.807	7.937	7.579	7.723	7.73	7.6555	7.4865	7.654	7.6905	7.4825	7.786	7.617	7.4815	7.114	7.603	7.3535	7.3325	7.318	7.45	7.6605	6.337	7.064	6.4365	6.9995	6.5935	6.9265	6.323	7.302	6.8465	6.6755	6.4985
AIP	7.285	7.134	7.44	7.578	7.061	7.015	7.285	7.284	7.715	7.361	7.303	7.204	7.436	7.272	7.387	7.043	7.318	7.088	7.426	7.533	7.832	7.295	7.653	7.704	7.551	7.82	7.818	7.726	8.131	7.858	7.729	7.563	7.551	7.518	7.914	7.947	7.464	7.909	6.729	7.069	6.55	6.829	6.691	6.651	7.377	6.898	6.875	6.45	6.605
AIPL1	2.4762	2.3804	2.3608	2.557	2.198	2.4238	2.1758	2.351	2.2756	2.2638	2.21	2.1396	2.2802	2.2536	2.243	2.2292	2.2386	2.1784	2.3624	3.0408	2.8064	2.8798	2.8644	2.86	2.842	2.8728	2.9314	2.788	2.8356	3.0634	2.8994	2.84	2.9274	2.8616	2.922	2.9194	2.874	2.961	2.3268	2.3604	2.312	2.215	2.411	2.3288	2.3052	2.304	2.4548	2.2936	2.3828
AIRE	3.327	3.0015	3.2005	3.1275	3.0595	3.2775	3.2265	3.213	3.0245	3.3115	3.165	3.096	2.937	3.0175	3.134	2.771	2.9865	2.9665	2.9885	3.355	3.1855	3.3145	3.3345	3.243	3.1725	3.273	3.177	3.286	3.4475	3.667	3.465	3.0675	2.935	3.2315	3.6205	3.1535	3.172	3.2255	2.303	2.768	2.442	2.3555	2.4855	2.5185	2.452	2.541	2.5975	2.3575	2.5075
AJAP1	2.24533	2.38333	2.22733	2.46533	1.955	2.21633	2.136	2.27867	2.42	2.31933	2.04233	2.38233	2.24	2.11267	2.05033	2.13967	2.21333	2.11133	2.3	2.76	2.985	2.869	2.99	2.97333	2.81633	2.94067	2.905	2.88767	2.96433	2.856	2.90867	2.84567	2.88267	3.03933	2.85467	3.02567	2.917	3.00733	2.35233	2.31433	2.41433	2.24533	2.24967	2.48533	2.35667	2.39133	2.35233	2.39333	2.29267
AK1	6.684	6.514	7.241	7.0005	6.669	7.3785	7.021	6.7365	6.608	7.7075	6.8505	6.4915	7.225	6.543	7.2075	7.046	6.433	7.008	6.9355	7.7275	7.611	7.5755	7.017	7.612	7.0035	7.363	7.3525	7.496	7.544	7.68	7.305	7.304	8.041	7.361	7.546	7.255	6.919	6.831	6.331	6.91	6.632	6.4975	6.5985	6.857	6.832	6.81	7.266	6.3655	6.4725
AK2	6.403	6.40937	6.43225	6.22088	6.36013	5.85675	6.31375	6.45737	6.25063	6.60225	6.343	6.46363	6.46363	6.28525	6.30987	6.15875	6.505	6.21413	6.36637	6.89787	6.98712	6.822	6.903	7.094	6.7395	6.94975	6.88887	6.83763	7.02	6.92387	7.03875	6.84975	6.7825	6.98688	7.109	6.9035	6.98813	7.07038	6.1215	6.4295	6.12437	6.54525	6.243	6.4905	6.47312	6.60013	6.60575	6.443	6.31062
AK3	6.5115	6.18125	5.89175	6.04	6.05	6.3505	6.618	6.632	6.3305	6.22025	6.495	6.55825	6.0135	6.28075	6.62875	6.43225	6.691	6.401	6.50725	6.6855	6.81925	7.0365	6.5945	6.865	6.58975	6.87275	6.63425	6.99325	6.5905	6.56075	6.75325	7.034	6.99025	7.1135	6.61875	6.83175	6.801	6.88875	6.6685	6.29775	6.3655	6.374	6.14	6.5885	6.64575	6.221	7.21375	6.5975	6.53225
AK3L1	2.70967	2.596	2.79	3.178	2.81333	2.88867	2.63467	2.93267	2.73933	2.81767	2.65267	2.555	2.81433	2.77467	2.44167	2.23433	2.82533	2.53267	2.54	3.28933	3.126	3.141	3.315	2.97567	3.16533	3.02167	3.18933	3.05	3.09967	3.218	3.05767	3.49967	2.96633	3.38867	3.15667	3.33433	3.53133	3.377	2.72433	2.60467	2.52633	2.60433	2.75533	2.59633	2.572	2.80033	2.81	2.51567	2.62733
AK5	4.25567	3.549	3.98967	3.567	3.46967	4.13733	3.31933	3.799	3.92533	3.93	3.94567	4.37	3.66233	4.034	4.55667	4.462	4.36467	4.50667	3.64933	4.595	4.491	3.555	4.80533	4.94067	4.748	4.80767	4.37333	4.71967	4.205	4.22333	4.45133	5.12633	3.96433	4.74267	4.53033	4.44067	4.28167	3.80833	4.684	2.95133	3.48467	3.65633	3.53033	4.574	4.025	3.37633	3.854	4.98467	4.40867
AK7	1.964	1.967	2.039	1.99	1.896	1.888	2.111	1.903	1.908	1.959	1.981	1.913	1.915	1.997	1.904	2.05	1.995	1.91	2.208	2.392	2.566	2.497	2.537	2.668	2.493	2.411	2.394	2.515	2.554	2.763	2.686	2.537	2.608	2.543	2.456	2.475	2.527	2.558	2.232	2.169	2.381	2.167	2.199	2.126	2.313	2.233	2.312	2.398	2.461
AKAP1	5.1322	4.717	4.7106	4.949	4.7428	4.5816	4.6938	4.8768	4.9188	4.8142	4.8658	5.0724	4.8548	4.7406	5.0742	4.8628	5.0822	4.7166	4.8556	5.0392	5.0106	4.9416	5.0282	5.0188	4.7862	5.0954	4.9546	5.167	5.2282	4.9834	5.3424	5.1174	5.2626	5.246	5.2858	5.07	5.0116	5.1114	4.8194	4.2008	4.123	4.3546	4.152	4.3102	4.3634	4.5164	4.436	4.3746	4.381
AKAP10	6.96325	6.93975	6.401	6.29125	7.27125	6.576	6.80175	6.459	6.682	6.32225	6.84525	6.8585	6.6255	6.8645	6.47525	6.8145	6.49	6.6985	6.5395	6.8595	6.7825	6.88375	7.07975	6.57675	7.25025	6.92275	7.093	7.36775	7.0955	7.0795	6.8495	7.06575	7.38525	6.917	6.9205	7.05975	7.088	7.056	5.2735	6.87925	6.36225	6.7435	6.46475	6.59375	5.67925	6.87325	6.0195	6.53225	6.5735
AKAP11	7.93067	7.67433	7.579	7.461	7.85767	7.578	8.09933	8.09667	7.452	7.46667	7.75467	8.29667	7.29067	7.845	7.63033	7.695	8.11	8.072	7.60667	8.46467	8.82933	8.73133	7.941	8.555	8.578	8.56	8.65633	8.706	8.42433	8.50433	8.35	8.694	8.91467	8.82867	8.42967	8.615	8.29767	8.618	8.81633	8.09367	8.417	8.53167	8.525	8.47833	8.81733	8.14033	8.52767	8.59133	8.711
AKAP12	2.402	4.159	3.1575	4.5925	2.7605	3.829	4.4065	2.876	3.6145	2.7375	4.7855	2.8655	4.7375	5.1425	5.443	4.9765	2.95	4.9325	5.1555	3.4465	6.288	3.88	5.9175	3.4845	3.171	3.2825	3.9815	3.4175	3.4525	3.4455	6.177	3.6635	3.8685	3.7145	4.16	5.007	4.1765	4.5355	2.799	3.8925	2.871	3.0805	2.8505	4.3345	5.5075	3.0455	3.4	4.0905	4.3275
AKAP13	6.855	6.744	6.3768	6.7118	6.5398	6.8718	6.6764	6.4964	6.6902	6.6784	6.3434	6.4762	6.9276	6.3378	6.8112	6.5836	6.47	6.4144	6.3898	6.8784	6.7846	6.7974	7.0836	6.7828	7.1788	6.9204	7.221	6.969	7.1822	7.0454	7.0386	6.5378	7.0098	6.843	6.8652	6.8466	6.7914	6.556	5.357	6.2256	5.9414	6.2796	5.7484	6.2084	5.665	6.5228	5.4794	5.4038	5.4762
AKAP14	2.213	2.323	2.498	2.6075	2.32	2.724	2.4255	2.4655	2.2945	2.337	2.278	2.324	2.348	2.389	2.4355	2.4695	2.765	2.3665	2.4865	2.844	2.97	2.955	3.044	3.019	2.8665	2.852	2.978	2.982	2.814	2.8215	2.8905	3.231	2.9905	3.056	2.9015	3.145	3.2045	3.1525	2.735	2.453	2.6185	2.465	2.4985	2.474	2.56	2.3645	2.585	2.8	2.4765
AKAP2 /// PALM2-AKAP2	5.67325	5.6435	5.8345	5.42275	5.3245	5.455	6.217	6.1965	5.123	6.50025	5.4335	6.02225	5.92525	5.18	6.00925	5.70425	6.23075	5.88275	5.73025	5.9685	6.42	6.093	6.107	7.0595	6.42875	6.20225	6.587	6.60425	6.0325	5.88425	6.37375	5.90875	7.2295	6.6655	6.11125	6.45125	6.43425	5.95525	6.1315	5.06575	5.355	5.72425	5.106	6.083	5.45025	5.53075	5.38	4.8415	5.21425
AKAP3	2.625	2.101	2.461	2.285	2.449	2.556	2.424	2.155	2.579	2.221	2.587	2.387	2.436	2.49	2.715	2.132	2.145	2.467	2.386	2.85	2.81	2.631	2.832	2.776	2.799	2.918	2.827	2.69	2.796	2.875	3.174	2.931	2.808	2.989	2.91	2.863	2.926	2.778	2.16	2.234	2.331	2.295	2.191	2.644	2.311	2.574	2.337	2.214	2.264
AKAP4	2.497	2.495	2.345	2.563	2.148	2.325	2.32	2.272	2.197	2.269	2.018	2.315	2.029	2.3	2.318	2.133	2.209	2.278	2.283	2.774	2.833	2.926	2.771	2.849	2.849	3.237	2.944	2.842	2.786	2.877	3.211	2.946	2.701	2.834	3.031	2.76	2.938	3.188	2.242	2.417	2.435	2.088	2.237	2.09	2.156	2.245	2.223	2.291	2.231
AKAP5	3.106	3.008	2.8235	2.2275	2.691	2.7795	2.823	2.6	2.5595	2.659	2.628	3.197	2.342	2.6485	2.8555	3.0295	2.7955	2.982	2.831	3.5465	3.664	3.491	3.305	3.6055	3.412	3.5915	3.421	3.5265	3.0535	3.416	3.26	3.4935	3.622	3.438	3.5445	3.657	3.7045	3.512	4.0545	2.844	3.7495	2.8095	3.052	2.801	3.537	2.6145	2.8555	4.1475	2.7935
AKAP6	2.65667	2.57833	2.66233	2.68	2.59733	2.59167	2.398	2.61367	2.47133	2.59333	2.628	2.61867	2.50333	2.589	2.46633	2.69933	2.466	2.471	2.68733	3.20167	3.09033	3.181	3.21933	3.19167	3.55067	3.06833	3.035	3.40767	3.09667	3.17467	3.24	3.409	3.57167	3.30067	3.26167	3.217	3.25667	3.43033	2.71833	2.589	2.60967	2.65133	2.70033	3.022	2.65267	2.702	2.561	2.82033	2.66933
AKAP7	4.83757	4.87586	5.23143	4.95	4.98414	4.91114	4.84229	5.13957	4.82757	4.821	4.918	5.07829	4.77271	5.00943	4.79771	4.88014	5.50557	4.79686	4.74929	5.51657	5.38357	5.47486	5.25629	5.433	5.199	5.33643	5.32271	5.653	5.33971	5.34157	5.17671	5.50057	5.40043	5.775	5.33686	5.38643	5.38486	5.41686	5.26629	4.80343	5.09829	5.06571	5.13071	5.07657	5.20571	5.01186	5.40986	5.60257	5.54729
AKAP8	5.622	5.68375	5.552	5.70425	5.91225	6.30625	5.58675	5.70525	5.625	5.745	5.49975	5.78325	5.71425	5.634	5.564	5.6475	5.75725	5.57475	5.66925	6.039	6.0615	6.134	6.2005	6.12625	6.0875	6.33925	6.17225	6.10325	6.4055	6.23775	6.1915	6.02275	6.273	6.2745	6.316	6.10175	6.048	5.804	5.52325	5.77275	5.7215	5.86775	5.72375	5.85625	5.718	5.9585	5.53175	5.7325	5.599
AKAP8L	3.1645	3.798	3.096	3.072	3.041	3.176	3.1845	2.9805	3.616	3.0105	2.8225	3.275	4.184	2.9555	3.5605	3.2895	3.3635	2.9655	2.773	3.437	3.4885	3.0075	3.1095	4.7425	3.7115	3.1875	3.164	3.589	3.936	3.6805	3.6505	3.0575	3.228	3.407	3.363	3.282	3.031	3.4085	2.5195	2.6325	2.6015	2.6805	2.5085	2.722	2.513	2.8015	2.287	2.757	2.577
AKAP9	6.23525	6.58825	6.29625	6.68325	6.52425	6.39025	6.48325	6.60275	6.55975	6.20575	6.333	6.49825	6.359	6.20925	6.449	6.489	6.54175	6.17525	6.45125	7.20675	7.3425	7.1925	7.179	7.26725	7.10075	7.2205	7.275	7.29775	7.17325	7.21025	7.354	7.4485	7.277	7.31675	7.23025	7.232	7.26175	7.128	6.8905	6.6695	6.9895	6.99275	6.91575	6.7035	6.81075	6.564	6.7885	6.91525	6.97675
AKD1	3.07375	3.23	3.01825	3.25525	3.15325	2.842	3.15025	3.2125	3.36375	3.107	3.25925	3.24075	3.156	2.94275	3.35125	3.46975	3.38275	3.4815	3.105	3.495	3.446	3.65925	3.65325	3.6245	3.51025	3.6955	3.55675	3.69925	3.64775	3.649	3.6805	3.466	3.66425	3.73325	3.464	3.70975	3.6375	3.44525	3.01725	3.224	3.3635	3.0795	3.146	3.38325	3.25825	3.09325	3.21	3.2485	3.219
AKIRIN1	8.47325	8.29025	7.8655	7.96162	8.3225	7.91275	8.36562	8.16875	8.02875	7.93075	8.27063	8.4615	7.958	8.48162	8.06438	8.5585	8.14	8.40888	8.37462	8.894	8.85238	8.84788	8.87162	8.71837	9.19962	8.90162	8.91013	9.00475	8.86163	8.89075	9.05162	8.85287	8.77988	8.8805	8.66687	9.07087	9.04663	8.82963	8.1595	8.66075	8.53875	8.61	8.36525	8.67088	7.96725	8.52088	8.52838	8.6275	8.88637
AKIRIN2	5.7715	5.8415	5.564	5.7265	5.904	6.078	5.6135	5.5245	5.7125	5.606	5.698	5.481	5.5295	5.643	5.701	5.7155	5.4095	5.657	5.623	6.225	6.0195	6.2825	6.4175	6.0715	6.394	6.217	6.3665	6.206	6.1335	6.305	6.4525	6.2095	6.1585	6.164	6.0785	6.26	6.2235	6.105	6.081	6.014	5.782	5.6875	5.66	5.8255	5.7285	5.8075	5.8265	5.706	5.89
AKNA	8.79433	8.95733	8.66	8.932	8.83433	8.65467	8.76433	8.61133	9.10867	8.72567	8.72133	8.832	8.92367	8.55	8.841	8.65	8.51133	8.48933	8.92433	8.86667	9.08033	8.72333	9.49533	9.001	9.18367	9.12633	9.15567	9.038	9.29533	9.35267	9.212	8.654	9.22667	8.82467	9.2	9.11633	9.43133	9.12033	7.80533	8.18733	8.11133	8.346	7.94933	8.241	7.92267	8.548	7.92333	7.85067	8.00533
AKNAD1	2.61433	2.33833	2.29033	2.91933	2.39967	2.47167	2.51867	2.42667	2.847	2.362	2.371	2.34	2.24267	2.24733	2.33533	2.40667	2.29067	2.46333	2.45567	2.93333	3.04133	2.91733	3.09633	2.853	2.89467	2.93433	2.98733	2.95833	2.94567	3.06	2.98333	2.94867	3.12767	2.878	3.06	2.82267	3.323	3.22833	2.469	2.36567	2.31567	2.30467	2.45833	2.57633	2.39633	2.37733	2.46867	2.64233	2.38067
AKR1A1	7.084	7.145	7.419	7.283	7.081	6.57	7.048	7.285	7.056	7.304	6.914	6.87	7.443	6.931	7.066	6.746	7.438	6.875	7.144	7.189	6.998	7.038	7.113	7.305	7.094	7.295	7.1	6.916	7.368	7.091	7.059	7.11	6.719	7.055	7.316	7.134	6.802	7.159	6.324	7.021	6.672	6.855	6.848	6.978	6.893	7.101	6.68	6.465	6.424
AKR1B1	7.322	7.341	7.621	7.77	7.382	7.057	7.301	7.707	7.788	7.721	7.382	7.695	7.509	7.24	7.437	7.293	7.728	7.081	7.348	7.193	7.632	6.956	7.207	7.544	7.024	7.404	7.137	7.18	7.712	7.322	7.395	7.358	7.508	7.33	8.21	7.561	7.159	7.41	7.035	7.156	6.807	7.019	6.732	7.118	7.045	7.273	7.09	6.794	6.615
AKR1B10	2.355	2.248	2.275	2.469	2.1315	2.5705	2.269	2.312	2.3295	2.076	2.453	2.2325	2.245	2.3925	2.245	2.3785	2.256	2.262	2.5655	2.826	2.773	2.887	2.891	2.718	2.853	2.861	2.809	2.898	2.746	2.7555	2.8675	2.8595	2.6585	2.782	2.7325	2.7375	2.827	2.919	2.3875	2.3265	2.1925	2.2025	2.207	2.1565	2.2605	2.202	2.2695	2.361	2.316
AKR1B10 /// AKR1B15	2.568	2.369	2.327	2.709	2.289	2.279	2.23	2.389	2.846	2.446	2.392	2.414	2.283	2.186	2.393	2.317	2.314	2.228	2.244	2.881	2.885	3.078	3.135	3.033	2.945	2.79	3.136	3.199	3.057	3.143	3.075	3.233	2.948	3.028	3.065	3.039	3.084	3.094	2.42	2.276	2.568	2.475	2.658	2.376	2.513	2.436	2.474	2.526	2.53
AKR1B10 /// AKR1B15 /// LOC340888	1.999	1.928	2.054	2.363	1.836	2.187	1.839	1.982	2.283	2.008	1.858	1.983	1.944	2	1.85	1.998	2.044	1.85	1.715	2.407	2.47	2.592	2.754	2.658	2.523	2.552	2.514	2.834	2.473	2.771	2.458	2.542	2.65	2.563	2.546	2.586	2.491	2.701	2.156	2.315	2.015	2.115	2.206	2.094	2.04	2.353	2.263	2.202	2.022
AKR1B15	2.057	1.953	2.067	1.986	1.898	2.41	1.927	1.842	2.068	1.845	2.13	2.036	2.005	1.929	1.858	1.956	1.912	1.968	1.935	2.615	2.721	2.7	2.767	2.662	2.649	2.751	2.744	2.689	2.689	2.819	2.77	2.686	2.858	2.921	2.627	2.554	2.76	2.754	1.954	2.227	2.03	2.044	2.187	2.124	2.249	2.207	2.189	1.917	2.055
AKR1C1	2.629	3.4945	3.618	3.1065	2.971	3.902	3.634	3.3325	3.474	3.1155	3.583	4.051	4.305	5.0175	3.4085	4.3735	4.856	3.4355	3.833	4.2925	4.3185	3.5885	5.1775	4.1035	5.182	3.764	4.0035	3.484	4.637	3.728	4.579	5.6875	3.5635	5.237	4.6795	4.3185	3.6155	5.535	2.9915	3.2825	3.8175	2.534	4.233	5.423	5.453	3.694	4.1235	4.8695	3.5675
AKR1C1 /// AKR1C2	2.265	3.813	2.893	3.454	3.056	3.214	3.351	3.473	4.878	2.809	4.211	4.223	2.945	4.415	2.907	3.32	3.465	3.627	2.426	3.107	4.809	3.18	3.511	3.278	4.433	3.778	3.379	2.879	4.233	3.19	3.349	5.361	3.169	3.671	3.379	2.982	3.352	4.494	2.752	3.424	3.103	2.8	3.448	4.708	4.005	3.294	4.093	3.603	3.396
AKR1C2	2.1354	2.465	2.199	2.9872	2.4736	2.2842	2.343	2.2692	2.6578	2.077	2.696	2.6494	2.2312	2.2106	2.0698	2.1326	2.1896	2.3806	2.125	2.7754	3.5364	2.8762	2.8822	2.8946	3.153	3.2086	2.82	2.8644	3.262	3.1892	3.0644	3.21	2.8974	2.918	2.923	2.8594	2.911	3.346	2.5008	2.3628	2.4034	2.4184	2.4632	2.9034	2.9506	2.4244	2.5492	2.5184	2.5174
AKR1C3	4.1175	4.257	4.324	4.2115	4.191	4.119	3.8455	4.2585	3.7955	4.35	3.9795	4.7	4.404	4.026	4.182	4.0615	4.3105	4.0515	3.8335	4.5725	5.211	5.218	4.6235	5.5235	4.425	4.9935	4.7615	4.28	4.7245	4.5525	4.662	5.0375	4.8155	5.246	5.115	4.3015	4.2285	4.6735	5.1355	4.9255	5.0035	5.0015	5.113	4.6725	5.2045	4.3515	4.8615	5.2765	4.3655
AKR1C4	2.546	2.941	2.996	2.831	2.879	2.754	2.693	2.684	2.858	2.771	3.054	2.769	2.713	2.651	2.891	2.727	2.683	2.705	2.844	3.321	3.305	3.408	3.359	3.373	3.38	3.212	3.365	3.117	3.381	3.504	3.448	3.3	3.277	3.363	3.458	3.199	3.346	3.409	2.593	2.358	2.49	2.475	2.394	2.468	2.5	2.499	2.466	2.589	2.508
AKR1CL1	2.296	2.146	1.786	2.486	1.915	1.992	1.946	2.124	1.786	1.981	2.081	2.109	2.035	1.931	2.066	2.217	1.963	1.82	2.225	2.583	2.453	2.453	2.794	2.502	2.557	2.512	2.651	2.611	2.631	2.481	2.658	2.601	2.617	2.495	2.46	2.722	2.562	2.677	2.029	2.266	2.15	2.277	2.014	2.418	1.986	2.097	2.025	2.214	2.212
AKR1D1	2.219	1.765	1.878	2.033	1.961	1.965	1.793	2.024	2.044	2.102	1.953	1.959	1.833	1.808	1.9	1.865	1.996	1.972	1.761	2.517	2.552	2.521	2.657	2.427	2.529	2.699	2.604	2.701	2.552	2.521	2.574	2.711	2.554	2.491	2.721	2.463	2.711	2.701	2.014	2.043	1.979	2.133	2.219	2.025	2.124	2.006	1.977	2.032	1.948
AKR1E2	2.5268	2.6722	2.7704	2.6348	2.592	2.5676	2.5748	2.618	2.68	2.6442	2.7246	2.513	2.748	2.5888	2.442	2.4504	2.6176	2.6136	2.6054	3.15	3.031	3.2962	3.1044	3.167	3.0518	3.2124	3.228	3.0136	3.1494	3.0732	3.087	3.2184	3.0488	3.1162	3.2954	3.0502	3.2116	3.1192	2.4122	2.5758	2.4772	2.4098	2.4794	2.4674	2.322	2.576	2.4746	2.5172	2.3294
AKR7A2	6.22067	6.199	6.02167	6.216	6.15867	5.71	6.06233	6.12267	6.33767	6.396	6.24067	6.002	6.46433	5.90833	6.41967	5.76733	6.06	5.97367	6.23067	7.157	7.12733	6.978	6.926	6.96167	6.728	7.02433	6.87267	6.791	7.20867	7.198	6.939	6.803	7.095	6.90733	7.01133	7.02033	6.631	6.64067	6.24733	6.04067	5.965	6.08633	5.91867	6.265	6.452	6.53467	6.02667	5.927	5.88867
AKR7A3	2.695	2.87	2.841	3.472	2.729	2.786	3.008	2.911	2.988	2.73	2.897	2.689	3.141	3.269	2.588	2.652	2.827	2.841	2.901	3.025	3.209	3.026	3.045	3.273	2.949	3.107	3.253	2.938	3.242	3.179	3.132	3.389	3.437	3.379	3.43	2.963	3.129	3.091	2.858	2.369	2.489	2.556	2.306	2.265	2.479	2.655	2.495	2.323	2.439
AKR7L	2.865	2.704	3.165	3.954	2.754	3.851	2.892	2.631	2.643	2.913	2.776	2.855	2.836	2.537	3.245	2.945	2.779	2.399	2.805	3.248	3.415	2.919	2.997	2.965	2.833	3.055	3.111	3.083	3.12	2.784	3.065	2.825	3.154	2.877	2.818	3.346	3.406	3.156	2.785	2.408	2.334	2.388	2.637	2.722	2.82	2.727	2.651	2.694	2.558
AKT1	4.99467	5.24867	5.071	5.206	5.20767	5.103	5.44233	5.00567	5.27133	4.871	5.13967	5.06933	5.30667	5.111	5.13333	5.205	4.975	5.058	5.42633	5.26367	5.341	5.33933	5.41567	5.37067	5.584	5.467	5.53867	5.39967	5.66633	5.417	5.59033	5.281	5.58367	5.31033	5.43633	5.53333	5.36167	5.47967	4.33133	4.748	4.42433	4.693	4.638	4.65733	4.39833	5.00033	4.51067	4.43	4.629
AKT1S1	4.07933	4.11633	4.24	3.78967	3.75367	4.30833	3.79467	3.63433	4.28867	4.31633	3.93567	4.024	4.291	4.028	4.33233	4.10767	3.87333	4.072	3.89067	4.86367	4.288	5.04033	4.21967	4.51533	4.34067	4.38567	4.31633	4.58333	4.47933	4.53967	4.34667	4.39	4.39867	4.19267	4.38167	4.46767	4.27933	4.15467	2.97667	3.416	3.19333	3.31333	3.11433	3.38067	3.42367	3.45	3.26633	3.07567	3.30933
AKT2	3.80333	3.60242	3.66983	3.85083	3.6935	3.79975	3.59058	3.63033	3.72192	3.73333	3.74083	3.57475	3.74183	3.61767	3.71108	3.65508	3.60242	3.64733	3.75025	4.20325	4.19542	4.03325	4.26717	4.12867	4.16825	4.18142	4.19467	4.17758	4.26742	4.22	4.26342	4.09175	4.32792	4.13817	4.25517	4.23892	4.14875	4.13492	3.282	3.46458	3.30625	3.41042	3.39925	3.42617	3.44058	3.61167	3.48683	3.37192	3.35492
AKT3	5.42033	5.5305	5.13683	5.34083	5.49983	5.0735	5.71133	5.64633	5.11133	5.40533	5.328	5.73533	5.09417	5.22983	5.41267	5.37533	5.62117	5.21367	5.56817	6.0385	5.93733	5.9205	5.51517	6.0695	5.5745	6.22967	5.71767	6.27733	5.65117	5.496	5.56533	5.6565	6.38917	5.93783	5.89733	5.63683	5.43167	5.32067	5.60867	5.01767	5.16933	5.61633	4.8805	5.41433	5.17533	5.277	5.188	5.56167	5.60717
AKTIP	8.12817	7.88833	7.906	7.89467	8.14233	7.93933	8.05	8.03617	7.97417	7.69183	8.01883	8.1875	7.87183	8.14233	7.92167	8.26617	8.1195	8.03033	7.93533	8.55983	8.41967	8.3505	8.51567	8.57533	8.4805	8.376	8.472	8.6305	8.55217	8.26567	8.403	8.35083	8.54833	8.55483	8.45767	8.73617	8.6695	8.46183	8.36833	8.06033	7.94333	8.1755	8.06667	8.06967	8.0315	8.03533	8.20617	8.36733	8.28
ALAD	5.0415	4.977	4.8305	4.9365	4.9355	4.9165	4.873	4.7895	4.8455	5.6185	5.0935	4.853	5.0685	4.9215	5.348	5.001	5.215	5.1	4.787	5.7775	5.583	5.7825	5.5725	5.5945	5.725	5.753	5.602	5.5265	5.9035	5.548	5.711	5.448	5.806	5.744	5.519	5.6905	5.5415	5.5815	4.6425	4.7235	4.586	4.6625	4.571	4.5325	4.6015	4.598	4.9275	4.5105	4.5005
ALAS1	6.40775	6.85675	6.31075	6.21225	6.4945	6.1495	6.44675	6.36425	6.837	6.48825	6.678	6.28375	6.58025	6.37325	6.1765	6.3665	5.9145	6.025	6.4445	6.849	6.47525	6.4435	7.26925	6.7515	7.32725	6.759	6.9075	6.78975	7.0945	7.09325	7.164	6.57225	6.54925	6.744	6.90225	7.33375	6.91	7.13575	5.647	6.45675	5.5345	5.94025	5.2555	5.96025	5.397	6.3755	5.14975	5.275	5.83875
ALAS2	11.0297	10.0243	11.2857	10.4543	9.95067	10.9437	10.705	8.61633	10.436	12.2207	11.4847	8.606	11.0747	10.266	11.703	12.093	9.25767	11.215	9.567	11.7427	8.57033	12.107	9.62067	10.2803	11.57	10.8863	10.885	11.505	11.4973	10.9303	9.91333	11.7957	10.8833	10.5557	9.91633	10.1337	9.25	8.83133	7.74733	11.0357	9.882	10.404	10.5477	10.239	10.0637	10.049	10.1853	10.105	9.783
ALB	2.17333	2.14867	2.27033	2.515	2.17333	2.20267	2.14033	2.237	2.27567	2.26267	2.193	2.156	2.20133	2.21867	2.186	2.166	2.23367	2.38733	2.31033	2.81633	2.88833	2.86267	2.72667	2.81167	2.806	2.76267	2.89667	2.825	2.68767	2.74467	2.86533	2.733	2.844	2.76833	2.798	2.74067	2.81633	2.95667	2.37067	2.29567	2.28867	2.30367	2.39367	2.285	2.39833	2.22167	2.37767	2.45233	2.39733
ALCAM	4.22262	4.92138	4.16962	4.119	4.09725	4.58713	4.68037	4.4585	3.99487	3.95075	4.52513	4.48425	4.13687	4.77013	4.18475	4.53287	4.1245	4.53413	4.62763	4.72125	5.10088	5.03437	5.15825	4.94125	5.159	4.83688	4.789	5.11487	4.95263	4.93487	4.77187	5.09962	4.676	4.94588	4.71063	4.63675	4.83025	5.14537	4.597	4.461	4.80187	4.79312	4.62975	4.56412	4.44738	4.37025	4.50713	4.5685	4.82012
ALDH16A1	4.762	4.546	5.164	4.442	4.386	4.822	4.613	4.803	4.754	5.147	4.884	4.667	4.995	4.481	5.234	4.167	4.654	4.402	4.574	5.277	5.467	5.227	5.358	5.467	5.555	5.695	5.413	5.222	5.674	5.233	5.668	5.17	5.517	5.147	5.586	5.225	4.84	5.112	3.606	4.043	4.001	4.014	3.694	4.001	4.304	4.382	3.854	3.578	3.625
ALDH18A1	5.4505	4.986	5.4615	4.9365	4.9595	5.114	5.3625	5.471	5.333	5.095	5.1925	5.591	5.3755	5.0245	5.468	5.058	5.3715	4.699	5.2315	5.759	5.898	5.553	5.878	6.242	5.292	5.8565	5.919	6.0425	6.087	5.7005	5.649	5.7685	5.997	5.8055	6.088	5.8595	5.3955	5.455	4.992	4.7515	4.807	5.016	4.5655	5.133	4.923	5.143	5.1495	4.8445	5.0075
ALDH1A1	8.653	9.30533	8.09733	8.307	8.80067	8.201	8.172	8.47167	7.84333	8.90733	7.67833	8.14433	9.142	8.131	8.34067	7.857	8.63933	8.435	8.13367	8.137	8.228	8.87033	9.19533	7.92	8.44067	8.60467	8.39333	7.989	8.48133	8.653	8.20067	7.55767	7.27467	8.569	8.34733	8.44667	7.84733	8.40867	6.926	8.97967	8.365	8.606	7.54833	8.215	6.826	8.54467	6.48833	6.866	7.47033
ALDH1A2	2.26933	2.323	2.54967	2.48633	2.262	2.43933	2.167	2.28067	2.42133	2.46733	2.296	2.227	2.29267	2.188	2.269	2.34167	2.24567	2.45867	2.27833	2.90167	2.877	2.89067	3.043	2.882	2.89067	2.88567	3.079	2.91533	2.77933	2.93367	3.05433	3.08	2.86967	2.875	3.006	2.87667	2.91633	2.765	2.30833	2.179	2.48733	2.25467	2.40833	2.33133	2.79367	2.404	2.206	2.48833	2.43033
ALDH1A3	2.44	2.408	2.28675	2.3855	2.357	2.323	2.38575	2.3475	2.35725	2.20775	2.29475	2.37275	2.35525	2.28175	2.342	2.27075	2.314	2.2255	2.41875	2.933	2.819	2.84025	2.82075	2.82475	2.8385	2.72975	2.88975	2.867	2.79675	2.9785	2.807	2.77825	2.81925	2.862	2.78275	2.812	2.90675	2.8245	2.51975	2.5005	2.383	2.51825	2.54575	2.5045	2.42325	2.54075	2.44425	2.623	2.5175
ALDH1B1	2.9425	2.7765	2.8335	2.8255	2.9635	2.496	2.852	2.9325	2.4945	2.909	2.873	2.8945	2.475	2.4785	2.8745	2.547	2.954	2.699	2.747	3.2885	3.3925	3.235	3.169	3.2135	3.209	3.109	3.1135	3.5265	3.109	3.022	3.3485	3.2155	3.357	3.0555	3.067	3.162	3.168	3.0355	2.963	2.5275	2.5925	2.908	2.717	2.631	2.6195	2.6285	2.5245	2.6125	2.6265
ALDH1L1	2.6585	2.5155	2.8325	2.754	2.4935	2.711	2.507	2.7255	2.775	2.6985	2.9215	2.4485	2.603	2.7085	2.6355	2.5795	2.8945	2.3885	2.84	3.176	3.0655	3.2645	3.182	3.113	2.9965	3.0155	3.02	3.132	3.078	3.182	3.182	3.023	3.2975	2.985	3.1335	3.0965	3.205	2.94	2.5565	2.471	2.5815	2.5295	2.328	2.6855	2.5885	2.583	2.741	2.481	2.414
ALDH1L2	2.515	2.685	2.53	2.854	2.498	2.456	2.6015	2.623	2.8075	2.6085	2.731	2.7515	2.785	2.6155	2.4465	2.6355	2.468	2.643	2.569	3.041	3.11	3.219	3.0345	3.155	3.151	3.1585	3.0725	3.307	3.0395	3.124	3.178	3.0425	3.0475	3.016	3.2	3.276	3.413	3.1495	2.426	2.469	2.4955	2.3445	2.5025	2.4335	2.5625	2.3895	2.5555	2.5055	2.559
ALDH2	7.725	7.588	7.4275	6.972	7.6965	7.334	7.116	7.4405	7.507	7.777	7.264	7.062	7.4885	6.889	7.088	6.6225	7.776	7.0645	7.4725	7.726	7.169	7.516	7.609	7.455	7.6025	7.454	7.187	7.0085	7.63	7.8865	7.5385	6.907	6.5205	7.096	7.608	7.4905	7.5135	7.7245	5.8385	7.2045	6.9505	6.6865	6.344	7.5595	5.4785	7.6705	5.537	5.841	6.0405
ALDH3A1	2.158	2.163	2.143	2.145	2.324	2.136	2.051	1.977	2.234	2.132	2.058	1.972	2.128	2.012	1.936	2.166	2.201	2.33	2.409	2.862	2.7	2.627	2.747	2.706	2.778	2.818	2.677	2.57	2.666	2.823	2.708	2.634	2.679	2.779	2.589	2.701	2.826	2.657	2.497	2.364	2.464	2.238	2.128	2.19	2.311	2.416	2.243	2.214	2.299
ALDH3A2	6.16633	6.22733	5.97067	5.91867	6.239	5.551	5.77233	6.095	5.80167	5.85633	5.918	6.11733	5.90767	5.93067	5.867	5.56	6.129	5.827	5.86867	6.31167	6.296	6.22867	6.266	6.48567	6.226	6.68133	6.33967	5.96667	6.16233	6.017	6.20633	6.10233	6.54633	6.38433	6.41833	6.22433	6.08567	6.15967	5.581	5.86367	5.73833	5.99733	5.38733	5.609	5.55233	6.05433	5.30967	5.38833	5.66167
ALDH3B1	6.055	6.31067	6.12933	5.54933	6.34067	5.401	5.973	5.79767	6.104	6.22033	6.05033	5.51633	6.34333	5.96167	6.113	5.842	5.79633	5.37933	5.88067	6.08967	5.70033	5.442	5.87067	5.73167	5.74833	5.79033	5.66133	5.78833	6.28767	6.04267	5.95067	5.555	5.44	5.71933	5.974	5.73433	5.799	5.64433	4.386	5.33433	5.05333	5.05733	5.25367	5.217	4.84767	5.798	4.69633	4.80467	4.75233
ALDH3B2	2.7755	2.7185	2.73425	2.77275	2.782	2.60625	2.7295	2.8375	2.79275	2.7945	2.8135	2.7215	2.7735	2.658	2.88675	2.656	2.7425	2.64075	2.79375	3.137	3.1355	3.1655	3.1335	3.2295	3.19275	3.07775	3.215	3.17825	3.264	3.2465	3.22375	3.27225	3.16625	3.154	3.40575	3.16225	3.38425	3.46	2.4835	2.673	2.5595	2.467	2.50275	2.6185	2.64725	2.58075	2.4815	2.63325	2.34375
ALDH4A1	4.818	4.996	5.048	4.9275	5.1765	4.8125	4.663	4.9535	4.8985	4.7515	5.0585	4.489	4.9075	4.7465	4.805	4.489	4.6305	4.774	5.0115	5.239	5.185	5.038	5.239	5.482	4.807	5.067	5.138	5.0515	5.188	5.0755	5.2645	4.8855	5.106	5.0625	5.16	4.864	5.1095	4.969	3.869	4.4195	3.978	4.4025	4.2985	4.504	4.0955	4.6035	4.4415	4.209	4.2995
ALDH5A1	4.967	4.5605	5.4405	4.374	4.7835	4.817	4.982	4.6065	4.9745	6.672	5.289	5.0635	4.649	4.896	5.61	5.615	5.082	6.37	4.641	5.637	4.8775	5.843	5.0915	5.412	6.174	5.4305	5.421	6.2	4.8885	5.6715	5.183	5.996	5.3005	5.859	5.194	5.358	5.608	4.9615	4.9855	5.068	4.843	5.7065	4.622	4.9565	4.803	4.8185	5.9065	5.1205	5.118
ALDH6A1	3.847	3.038	3.793	3.806	3.512	3.037	4.155	4.356	4.592	4.189	3.571	4.397	4.24	3.994	4.443	3.761	3.711	3.657	3.146	5.648	4.632	4.744	4.428	5.319	4.004	4.482	5.06	4.484	4.829	5.232	5.387	4.795	5.851	5.251	4.019	5.395	4.752	5.416	3.997	3.621	3.468	3.709	3.164	3.333	3.61	3.462	3.764	2.897	3.928
ALDH7A1	2.86325	2.521	2.28075	2.93825	2.562	2.84	2.48275	2.69225	2.96225	2.48175	2.4405	2.6645	2.50675	2.514	2.74625	2.50525	3.07525	2.5295	2.418	3.03925	3.048	3.2075	3.12525	3.191	2.982	3.45825	3.126	3.17675	3.14025	3.15	3.3115	3.2045	3.24225	3.41275	3.2505	3.416	3.48	3.3955	2.469	2.481	2.706	2.5245	2.6585	2.373	2.78725	2.46225	2.587	2.75	2.51425
ALDH8A1	3.299	2.84	2.6645	2.586	2.723	3.9275	3.0595	3.4965	3.6315	2.8425	2.9935	3.064	3.014	2.922	2.9875	2.686	3.431	2.881	3.0985	3.5175	3.7825	3.5785	3.16	4.113	3.3455	3.541	3.7395	3.614	3.749	3.565	3.5035	3.751	3.831	3.4485	3.361	3.8565	3.522	3.0665	2.9565	2.719	3.1155	2.8975	2.473	2.993	2.3285	3.029	2.6375	2.921	3.479
ALDH9A1	7.25167	7.21467	6.868	7.23233	6.907	6.41233	6.602	6.74367	7.007	6.92633	7.03633	6.91567	7.176	7.034	7.16333	7.311	6.93267	7.041	7.126	6.33167	6.64333	6.161	6.724	6.50533	6.91167	6.54767	6.87033	6.93767	6.42867	6.441	6.689	6.51033	6.46233	6.48867	6.619	6.822	6.81267	6.36233	5.89733	6.86533	6.40033	6.915	5.891	6.67133	5.63367	6.88833	5.99533	5.93467	6.13733
ALDOA	10.253	10.1875	9.987	10.2885	10.1655	9.762	9.803	9.687	10.37	10.03	10.055	9.793	10.2755	9.9695	9.962	9.922	9.8545	9.754	10.212	9.918	9.695	9.576	10.074	9.7485	10.472	9.9325	9.9685	9.7595	10.3015	10.1805	10.119	9.559	9.723	9.7705	10.113	10.059	10.16	10.1615	8.381	9.5595	8.775	9.386	8.755	9.2755	8.7505	9.7645	8.589	7.9035	8.44
ALDOAP2	4.414	3.002	2.75	6.033	2.971	4.857	3.31	3.324	4.227	3.075	2.965	2.629	3.625	3.794	3.156	2.947	2.894	2.964	2.876	3.108	3.946	3.107	3.258	3.577	3.515	3.26	4.102	3.623	3.789	3.437	3.14	4.014	3.27	3.864	3.329	3.749	4.49	4.587	3.141	3.167	3.678	3.195	3.357	3.375	3.884	3.273	3.717	3.581	3.396
ALDOB	2.1435	2.318	2.329	2.345	2.2115	2.34425	2.18375	2.1445	2.27225	2.358	2.28	2.24025	2.1995	2.245	2.266	2.20025	2.261	2.27775	2.457	2.894	2.81625	2.8425	2.88	2.83375	2.9675	2.9035	2.898	2.93175	2.917	3.06125	2.85475	2.94125	2.9385	2.85525	3.0095	2.79925	2.9455	2.975	2.34225	2.339	2.39075	2.3405	2.447	2.3505	2.378	2.4415	2.351	2.37625	2.3105
ALDOC	5.6644	5.3798	5.78	5.6584	5.2682	5.3178	5.3036	5.2474	5.737	5.8364	5.624	5.7668	5.7514	5.5792	5.8156	5.8132	5.7804	5.1706	5.464	5.5572	5.1134	5.4136	5.671	5.5958	5.2658	5.4178	5.6132	5.8624	5.907	5.4552	5.6346	5.2142	5.2508	5.4376	5.7506	5.6138	6.0442	5.3486	5.17	4.7326	4.486	4.9098	4.2822	4.9046	4.7114	5.1188	4.5744	4.266	4.28
ALG1	4.343	4.521	4.683	4.747	4.221	4.722	4.845	5.114	4.813	4.467	4.689	4.893	4.816	4.507	5.341	4.481	4.691	4.057	4.21	4.365	4.608	5.042	4.948	5.002	4.353	4.858	4.487	5.019	5.228	4.343	4.464	4.605	5.11	4.672	4.728	4.754	4.833	4.367	4.502	3.917	3.931	4.511	4.12	3.805	4.237	4.094	4.842	4.178	4.952
ALG10 /// ALG10B	4.35967	3.823	4.23867	4.125	3.964	3.26667	4.522	4.734	4.50967	4.17567	4.40133	4.456	3.637	4.463	3.95933	4.06	4.679	4.368	4.613	4.973	5.41333	5.00367	5.341	5.64467	4.55233	4.738	5.062	5.52567	5.04867	4.355	4.66167	5.35067	5.129	5.29533	4.68367	4.94467	4.64267	4.84267	5.42567	4.19167	4.664	4.477	4.09467	4.32867	4.591	4.02667	4.637	5.11833	4.573
ALG10B	5.521	5.281	5.976	5.03	5.352	5.973	5.815	6.752	5.133	5.077	5.963	6.233	4.896	6.588	5.728	5.838	6.638	6.299	5.93	6.195	6.176	6.348	5.794	6.611	5.709	6.329	6.092	6.611	5.566	5.704	5.651	7.294	6.045	7.092	5.825	6.435	5.546	6.056	6.958	5.898	6.632	5.976	6.327	6.25	7.237	5.159	6.896	7.756	7.408
ALG11 /// UTP14C	5.3475	5.4195	5.07	5.1045	5.678	5.3855	5.807	5.3115	4.8295	5.573	5.436	5.585	5.028	5.34	5.8175	5.625	5.352	5.6655	5.127	5.391	5.324	5.568	5.348	5.07	5.549	5.483	5.3085	5.6705	5.257	5.105	5.3995	5.1645	5.875	5.4855	5.095	5.5995	4.945	5.019	5.151	5.024	5.11	5.7335	5.1175	5.3155	4.994	4.778	4.957	5.4735	5.4235
ALG12	4.238	3.851	3.591	3.783	4.011	3.894	4.375	3.942	4.328	4.255	3.96	4.146	4.152	3.499	3.896	4.113	4.3	3.885	4.422	5.096	4.953	4.763	4.99	4.906	5.024	5.166	5.215	4.506	5.386	5.12	5.192	4.666	5.032	4.86	5.093	5.372	4.649	4.943	3.651	3.708	3.08	3.523	2.982	3.534	3.265	3.679	3.306	3.288	3.772
ALG13	5.1864	5.114	5.4094	4.991	5.3272	5.8078	5.2886	5.704	4.7222	5.1298	5.2958	5.6106	4.9902	5.3416	5.2786	5.53	5.948	5.7596	5.4752	5.658	5.753	5.9528	5.4784	5.9892	5.384	5.6906	5.6818	5.9298	5.4772	5.5222	5.3794	6.085	5.5384	5.9824	5.7666	5.639	5.293	5.8776	6.407	5.1022	5.6686	5.4978	5.814	5.4744	6.13	5.0178	5.8682	6.2616	6.1614
ALG14	4.09	4.184	4.072	3.252	3.515	4.536	4.168	4.191	4.227	4.099	3.866	3.755	4.122	3.8	4.044	3.604	4.87	4.238	3.66	4.87	5.215	5.113	5.132	6.115	5.309	5.404	5.413	5.015	5.011	5.217	5.115	4.981	5.301	5.301	5.482	4.919	5.239	5.179	5.09	3.977	4.511	4.363	4.555	4.427	4.944	3.918	4.264	4.954	4.808
ALG1L	2.308	2.099	2.168	2.164	2.137	2.335	2.392	2.13	2.587	2.137	2.171	1.954	2.117	1.993	2.195	2.009	1.899	2.142	2.248	3.182	2.838	2.988	2.981	2.781	2.87	2.922	2.758	3.055	3.09	2.952	3.047	2.957	2.942	3.005	2.919	2.935	2.956	2.898	2.202	2.214	2.113	2.132	2.163	2.159	2.379	2.206	2.166	2.216	2.026
ALG1L2	2.27	2.295	2.182	2.779	2.333	2.133	2.079	2.331	2.644	2.533	2.311	2.267	2.224	2.185	2.129	2.217	2.22	2.263	2.534	3.447	3.272	3.034	3.374	3.375	3.339	3.128	3.305	3.281	3.269	3.326	3.214	3.295	3.219	2.869	3.434	3.21	3.351	3.172	2.698	3.006	2.939	2.636	2.756	2.902	2.937	3.006	2.746	3.014	3.021
ALG2	5.099	5.24033	5.49867	4.91767	5.30433	4.681	5.341	5.456	5.16733	5.187	5.322	5.55333	4.983	5.59167	5.01933	4.94833	5.52433	4.99967	5.44267	6.00333	6.06067	6.03567	5.868	6.322	5.60167	5.90133	5.88033	6.22833	5.74667	5.726	5.81967	5.88667	6.06633	5.93933	5.98633	5.87633	5.71867	5.95367	5.853	5.319	5.647	5.57433	5.648	5.50733	5.46067	5.204	5.535	6.061	5.58633
ALG3	6.307	6.127	6.4165	6.192	6.157	6.163	6.1315	6.372	6.236	6.5715	6.1275	6.374	6.712	6.0375	6.597	6.1685	6.6265	5.831	6.259	7.072	6.9315	6.9085	6.826	7.0915	6.5645	7.043	6.933	6.8995	7.495	6.796	6.977	6.4675	6.958	6.9425	6.847	6.9555	6.4665	6.3875	6.1565	6.071	5.6895	6.172	5.8015	5.956	6.0575	6.6285	5.6035	5.437	5.777
ALG5	7.697	7.596	8.148	7.426	7.822	8.145	7.869	8.23	7.492	7.773	7.792	8.076	7.802	7.637	8.012	7.793	8.307	7.812	7.608	9.127	9.256	9.072	8.813	9.448	8.429	8.995	9.034	8.929	8.979	8.442	8.693	9.199	9.253	9.162	9.153	8.943	8.537	8.503	8.902	8.263	8.645	8.084	8.751	8.265	8.83	8.03	8.652	8.854	8.627
ALG6	4.68333	4.613	4.65867	4.31367	5.097	4.84633	5.19133	4.93733	4.88967	4.555	4.91633	5.12933	4.783	5.07433	4.68633	4.70167	5.15167	4.73	5.09233	5.51733	5.478	5.65133	5.556	5.64833	5.42967	5.66867	5.56967	5.54967	5.48033	5.36233	5.49633	5.784	6.08767	5.94833	5.51433	5.71433	5.39733	5.39967	5.14033	5.17067	5.24267	5.07533	5.48667	5.214	5.59133	4.77833	5.39433	5.86267	5.66667
ALG8	7.09	6.803	7.012	6.782	6.935	6.488	6.961	6.924	6.734	7.092	6.656	7.074	7.032	6.571	7.094	6.306	7.212	6.769	7.086	8.107	8.159	8.38	8.286	8.594	7.701	7.804	8.373	8.199	8.594	7.948	8.19	7.789	8.237	8.365	8.281	7.996	8.041	7.762	7.865	7.181	6.898	7.431	6.615	7.258	7.041	7.392	7.262	7.185	7.129
ALG9	5.0542	5.078	5.2436	5.4228	5.5182	5.897	5.2262	5.4032	5.2114	5.3322	5.3126	5.5076	5.2728	5.3222	5.3118	5.094	5.5406	5.2136	5.3568	6.1546	5.8496	5.9594	6.0092	6.163	5.605	5.8372	5.9184	6.0276	6.1374	5.739	5.987	5.7954	6.154	6.2	6.3388	5.8988	5.9146	5.4722	5.538	5.059	5.4146	5.3662	4.9664	5.6982	5.279	5.2496	5.334	5.5242	5.4528
ALK	2.3485	2.1665	1.8065	2.293	1.9185	1.969	2.0085	2.1045	1.916	2.203	2.003	2.2965	2.049	2.061	2.091	2.4775	1.911	2.235	1.9075	2.4855	2.59	2.5	2.4325	2.431	2.535	2.62	2.6125	2.626	2.633	2.6805	2.5405	2.503	2.5215	2.6315	2.5195	2.7745	2.6685	2.565	2.16	2.433	2.0865	2.365	2.0985	2.336	2.1835	2.4235	2.149	2.1425	2.1815
ALKBH1	4.819	4.9165	4.791	4.4265	5.003	3.6455	5.079	5.1665	4.7625	4.967	4.875	5.0335	4.939	5.0165	5.0175	4.3605	5.188	4.5645	5.2275	5.5365	5.2355	5.253	5.14	5.1795	4.717	5.656	5.25	5.284	5.1625	4.7955	5.218	5.253	5.161	5.0255	5.3755	5.481	5.492	4.9035	5.128	4.617	4.6855	4.366	4.7075	4.794	4.6265	5.101	5.3015	4.903	4.831
ALKBH2	4.294	3.9965	4.333	3.9675	4.2225	4.3655	4.188	4.3295	4.519	4.152	4.2525	4.561	4.32	4.2755	4.274	4.4	4.727	4.0835	4.1815	4.3675	4.6335	4.408	4.3895	4.5765	4.427	5.173	4.5575	4.099	4.4565	4.293	4.3475	4.307	4.58	4.647	4.682	4.4435	4.532	3.9535	3.344	3.618	3.354	3.456	3.459	3.3615	3.7565	3.5885	3.703	3.2415	3.7105
ALKBH3	5.594	6.345	6.63	5.92	6.365	6.275	5.947	6.431	6.285	6.401	6.702	6.675	6.152	6.309	6.231	6.062	6.84	5.961	6.27	6.611	6.518	6.748	6.761	7.03	6.649	6.804	6.508	6.713	6.707	6.49	6.581	6.799	7.028	6.928	6.992	6.584	6.455	6.862	6.74	6.267	6.04	6.216	5.834	6.069	6.293	5.848	6.293	6.528	6.102
ALKBH4	4.775	4.833	4.57	4.791	4.438	3.878	4.801	4.32	4.596	4.584	4.533	4.73	4.594	4.635	4.97	4.524	4.636	4.429	4.56	4.973	4.736	5.155	4.812	4.764	5.007	4.867	5.101	4.68	5.175	5.311	4.922	4.772	5.012	5.118	4.931	4.968	4.985	4.678	3.111	3.639	3.44	3.77	3.593	3.556	3.597	3.894	3.156	3.429	3.704
ALKBH5	5.71467	5.81	5.91333	5.76667	5.81767	5.76033	5.74967	5.75567	5.77533	5.84033	5.59433	5.84333	5.80567	5.676	5.72067	5.73267	5.70333	5.66	5.79167	6.00833	5.83067	5.873	5.86667	5.97267	5.83067	5.93133	5.88433	5.841	5.878	5.99833	6.013	5.62367	5.92833	5.793	5.95933	5.87067	5.92633	5.84833	5.03233	5.31367	5.12233	5.28733	5.10267	5.33467	5.08267	5.24067	5.10567	5.05933	5.10867
ALKBH6	3.93733	3.10067	3.30967	3.28933	3.088	3.218	3.20833	3.14033	3.49067	3.31633	3.081	3.05367	3.46867	2.99567	3.11967	3.029	3.001	3.17833	3.247	3.49367	3.43467	3.38967	3.38667	3.45367	3.372	3.504	3.555	3.66167	3.56167	3.39167	3.56833	3.485	3.57233	3.32467	3.64267	3.50767	3.53733	3.58633	2.35233	2.69333	2.65667	2.49467	2.64767	2.603	2.79467	2.891	2.82933	2.49067	2.40367
ALKBH7	5.024	4.9405	4.9295	4.9325	4.73	4.87125	4.7735	4.8625	5.104	4.59325	4.9105	4.92275	5.08275	5.11175	4.875	4.8095	4.9025	4.9735	4.94425	5.06275	4.883	4.6885	4.6305	4.8745	4.8685	4.91575	4.74425	4.85325	5.03975	4.68625	4.83475	4.87325	4.74425	4.82975	4.81175	5.04025	4.5255	4.69625	4.46525	4.2285	4.02425	4.13975	4.565	4.208	5.0935	4.46675	4.56025	4.18525	4.48275
ALKBH8	4.1205	4.3445	4.167	4.246	4.3405	3.8695	4.231	4.608	4.1925	4.3285	4.3615	4.7435	4.003	4.57	4.3805	4.152	4.7975	4.5225	4.4435	4.9725	5.5275	5.194	4.8755	5.1265	4.697	5.014	4.874	5.168	4.496	4.73	4.966	5.292	5.2275	5.3775	5.3535	5.117	4.726	5.1215	5.2895	4.0965	4.6425	4.724	4.6085	4.495	4.7525	4.2925	4.742	5.066	4.9175
ALLC	2.204	2.227	2.322	2.402	2.27	2.27	2.226	2.24	2.27	2.326	2.293	2.46	2.28	2.071	2.357	2.075	2.358	2.041	2.376	2.701	2.7	2.682	2.539	2.745	2.74	2.731	2.766	2.755	2.749	2.758	2.684	2.69	2.675	2.518	2.934	2.874	2.779	2.833	2.404	2.217	2.239	2.288	2.142	2.438	2.37	2.192	2.126	2.31	1.999
ALMS1	5.795	5.124	5.603	6.069	5.261	5.124	5.268	5.9	5.87	5.901	5.508	5.658	5.713	5.287	5.791	5.353	5.462	5.438	5.121	5.825	5.075	5.241	5.363	5.667	5.395	5.906	5.328	5.943	5.578	5.539	5.368	5.274	6.198	5.609	5.763	5.579	5.582	5.266	4.137	4.816	4.989	5.241	4.504	4.811	4.712	5.716	5.28	4.129	4.311
ALOX12	5.075	4.801	5.228	5.394	5.191	4.251	5.056	4.906	4.783	6.52	5.013	5.347	5.65	4.93	5.863	5.347	5.099	5.228	4.716	4.426	4.814	4.908	5.079	4.677	4.853	5.531	4.211	5.127	5.181	5.525	4.906	5.185	5.578	4.941	4.903	4.484	4.753	3.786	3.62	4.811	2.932	4.38	4.869	3.661	5.028	5.42	3.957	3.483	3.532
ALOX12B	2.301	2.15	2.286	2.408	2.18	2.289	2.194	2.255	2.139	2.279	2.047	2.315	2.241	2.157	2.194	2.111	2.354	1.89	2.316	3.017	3.158	3.039	3.114	3.184	3.035	3.019	3.094	3.128	3.13	3.112	3.068	2.946	3.956	3.087	3.057	3.022	3.207	2.904	2.506	2.453	2.393	2.381	2.349	2.39	2.329	2.53	2.16	2.297	2.356
ALOX15	5.184	4.68867	5.197	4.047	4.336	4.97433	6.60633	6.317	5.25667	3.937	5.84833	5.82033	6.421	6.27433	6.09967	4.561	5.67333	4.69533	4.458	4.681	4.90667	4.30033	4.252	4.60633	4.11433	4.70867	5.69133	5.38467	5.80967	6.39467	5.48167	4.284	3.26267	5.36333	4.52333	4.63767	3.29567	7.14133	3.399	5.14033	3.39167	3.80567	4.45	2.94733	4.151	3.64267	3.20533	2.80167	3.53733
ALOX15B	2.6326	2.6206	2.7452	2.8572	2.7166	2.807	2.4956	2.798	2.723	2.5806	2.6524	2.4676	2.79	2.7804	2.5084	2.5726	2.6154	2.6648	2.6998	3.0602	3.0994	3.0012	2.994	3.094	3.2544	3.2908	3.201	3.1194	3.176	3.3214	3.1472	3.116	3.088	3.05	3.245	3.2128	3.4234	3.2154	2.281	2.536	2.5372	2.4226	2.391	2.5056	2.5972	2.469	2.466	2.4618	2.3346
ALOX5	6.8935	6.8975	6.3495	6.338	6.794	6.462	6.652	6.151	7.1905	6.1575	6.8825	6.3435	6.656	6.549	6.371	6.784	6.0345	6.599	6.561	6.189	6.4885	6.0485	6.764	5.905	7.1165	6.2555	6.646	6.128	6.712	7.139	6.557	6.376	5.5115	6.2935	5.9605	6.4515	6.4545	6.7945	5.1965	6.603	6.0565	5.9675	5.7465	5.9955	5.357	6.6295	5.6285	5.38	5.7235
ALOX5AP	11.235	11.54	10.901	11.406	11.561	10.951	11.47	11.071	11.763	11.002	11.329	11.428	11.429	11.493	11.261	11.353	10.56	11.253	11.63	11.175	11.213	10.916	11.528	11.106	11.439	10.945	11.499	11.207	11.672	11.487	11.732	10.975	10.944	11.235	11.302	11.704	12.059	11.588	10.549	11.479	10.842	11.007	10.966	10.996	10.998	11.311	10.994	11.082	11.212
ALOXE3	2.4195	2.20575	2.40125	2.40725	2.24375	2.40225	2.168	2.24725	2.218	2.44325	2.33575	2.24025	2.41675	2.33975	2.21425	2.18325	2.269	2.20725	2.32725	3.17875	2.8715	2.92825	2.94275	2.84075	2.88925	2.86425	2.96075	3.073	2.88875	2.97075	2.8785	2.90825	2.9385	2.905	2.89725	2.859	3.0495	2.92475	2.3465	2.683	2.403	2.30175	2.39225	2.44475	2.45825	2.52275	2.5585	2.4895	2.4565
ALPI	2.5495	2.4785	2.5955	2.526	2.7335	2.443	2.6445	2.6755	2.44	2.617	2.5055	2.503	2.6575	2.677	2.5535	2.478	2.4175	2.5195	2.5385	3.056	2.806	2.8685	2.964	2.7775	2.8325	2.9095	2.855	2.832	2.798	2.85	2.839	3.074	2.7105	2.847	2.962	2.871	3.069	2.9955	2.2095	2.415	2.16	2.1695	2.413	2.2325	2.457	2.313	2.2035	2.2505	2.181
ALPK1	6.961	7.135	5.98833	6.329	6.92867	6.336	6.739	6.101	6.64833	6.33967	6.64433	5.835	6.303	7.037	6.32367	7.235	5.55633	6.39067	6.63633	6.73	6.327	6.96933	7.615	5.92433	7.725	6.91933	7.633	7.357	7.092	7.65067	6.95767	6.86433	6.12333	6.59767	6.10133	6.49733	7.50967	7.02467	5.283	6.08467	6.93033	5.943	6.69733	6.74233	5.843	6.41133	5.61633	6.165	6.50133
ALPK2	2.172	2.325	2.525	2.254	2.256	2.522	2.412	2.226	2.193	1.891	2.728	2.157	2.074	2.211	1.799	2.046	2.131	1.899	2.119	2.881	2.801	2.867	3.004	2.839	2.492	2.623	2.591	2.851	2.828	2.801	2.902	2.909	3.088	2.656	2.945	2.868	2.937	2.845	2.072	2.584	2.436	2.086	2.232	2.288	2.192	2.217	2.28	2.263	2.693
ALPK3	2.73667	2.73767	2.733	2.82433	2.79233	2.68533	2.583	2.61067	2.61033	2.57933	2.76	2.61	2.83933	2.57033	2.68033	2.93967	2.63433	2.74733	2.78667	3.45133	3.06133	3.19767	3.34	3.146	3.291	3.24233	3.17567	3.35233	3.257	3.38267	3.39433	3.251	3.23767	3.28533	3.64267	3.194	3.30267	3.35267	2.522	2.62367	2.47633	2.51333	2.63967	2.66233	2.489	2.58867	2.614	2.584	2.60733
ALPL	8.9794	8.303	7.7014	8.3702	7.828	8.7432	8.4168	7.5228	8.3726	7.4688	8.6264	7.073	7.9212	8.3006	8.0216	8.7876	6.4008	8.5566	8.0518	8.8306	9.0434	7.2592	8.9256	7.1896	8.9908	8.0788	9.1122	7.9402	7.88	8.8564	8.9786	8.2884	6.6432	8.233	8.088	8.2872	8.5536	8.8976	7.2516	7.8054	7.8174	6.7198	7.8752	8.0108	7.2656	8.3004	8.1878	7.12	7.5116
ALPP	2.6365	2.5765	2.6415	2.5565	2.7345	2.682	2.343	2.677	2.5455	2.6415	2.8225	2.5545	2.6455	2.675	2.5975	2.6215	2.557	2.51	3.006	3.1905	2.985	3.2565	3.191	3.0605	3.2005	3.1375	3.0385	2.996	2.944	3.1985	3.1555	3.234	3.054	3.1465	3.158	3.049	3.1205	3.0565	2.4185	2.531	2.435	2.342	2.499	2.664	2.2285	2.549	2.4135	2.467	2.497
ALPPL2	3.201	3.326	3.269	3.491	3.155	3.339	3.05	3.156	3.752	3.141	3.21	3.27	3.216	3.053	3.114	3.079	3.117	2.905	3.364	3.4	3.52	3.334	3.491	3.558	3.143	3.22	3.368	3.351	3.414	3.166	3.326	3.321	3.163	3.383	3.845	3.314	3.816	3.648	2.209	2.419	2.704	2.494	2.262	2.929	2.878	2.554	2.908	2.587	2.215
ALS2	3.8502	4.4932	4.179	3.9298	4.1444	4.085	4.125	4.0332	4.0402	4.0046	3.969	4.4388	4.3308	4.467	4.0734	4.067	4.247	4.423	4.1974	4.727	4.7458	4.774	4.9504	4.8426	4.6184	4.6916	4.6766	4.978	4.6882	4.7772	5.0224	4.9246	5.0672	4.7804	4.9322	4.7534	4.945	5.0384	4.2276	4.44	4.3874	4.3994	4.1556	4.2028	4.237	3.9276	4.3404	4.5192	4.7206
ALS2CL	3.875	3.47133	4.09933	4.15833	3.91767	4.33867	3.36033	3.98333	3.771	4.01567	3.71733	3.58967	4.061	3.77867	4.24467	4.038	4.756	3.75667	3.792	3.69133	3.724	3.72067	3.727	3.72	3.645	4.125	3.592	3.69033	4.017	3.75467	3.95867	3.568	3.711	3.84933	3.944	3.95233	3.35067	3.55867	3.03133	3.10067	2.97933	3.082	2.989	3.146	3.23	3.11733	3.484	3.00067	2.98533
ALS2CR11	5.246	4.487	6.067	6.543	5.34	4.965	5.511	5.788	5.697	6.438	4.544	5.789	4.504	5.797	5.358	5.206	5.632	5.57	4.966	5.119	5.25	5.208	5.3	6.726	5.624	5.714	6.031	6.003	5.518	4.807	6.231	6.178	6.185	6.406	6.751	6.345	6.14	6.87	5.415	6.004	5.591	5.352	4.853	5.912	5.186	5.37	6.015	5.553	5.168
ALS2CR12	3.0265	2.5305	2.7495	2.76	2.7045	2.493	2.8545	2.4835	2.5895	3.6515	2.668	3.0135	3.0965	2.8925	3.5985	3.3345	2.714	3.626	2.753	3.31	3.196	3.43	3.0555	3.027	3.3315	3.2175	3.412	3.3055	3.146	3.249	3.188	3.5275	3.22	3.0485	3.1045	3.3265	3.1775	3.217	3.0425	2.78	3.195	2.937	3.1	2.7205	3.0085	2.7835	2.8075	2.987	2.968
ALS2CR4	3.633	3.99825	3.74325	3.9635	4.09425	4.8085	4.03425	4.13475	3.55675	4.4915	4.13475	4.2395	3.865	4.03275	3.92525	4.30175	4.659	4.20975	4.27025	4.3305	4.44575	4.46	4.6715	4.483	3.845	4.56525	4.24775	4.326	4.2045	3.8875	4.353	4.73075	4.951	4.9575	4.94875	4.527	4.32175	4.59925	5.81725	3.61975	4.6845	4.1505	4.15875	3.978	4.66825	3.64775	4.5075	4.799	4.88625
ALS2CR8	3.73433	3.77467	3.57617	3.72833	3.81017	3.7865	4.01367	3.71567	3.4395	3.52	3.78133	4.00417	3.5965	3.87133	3.8475	3.914	4.02283	3.94267	3.70267	4.08383	4.2755	4.08	3.61567	4.06817	4.0545	4.2575	4.09467	4.322	3.93533	4.185	3.86383	4.32667	4.64683	4.35217	3.9945	4.1555	4.03233	4.09067	4.09583	3.59567	3.775	4.06683	3.61683	3.96117	3.98517	3.565	4.1785	4.34033	4.219
ALX1	1.791	1.886	1.747	1.964	1.683	2.431	1.776	1.827	2.01	1.712	1.788	1.757	1.957	1.873	1.584	1.785	1.686	1.758	1.959	2.489	2.423	2.687	2.576	2.691	2.357	2.521	2.483	2.61	2.393	2.478	2.671	2.536	2.391	2.526	2.367	2.375	2.665	2.579	2.181	2.167	2.115	2.268	2.321	2.203	2.186	2.002	2.287	2.092	2.155
ALX3	2.297	2.365	2.411	2.697	2.51	1.965	2.351	2.598	2.313	2.704	2.488	2.486	2.419	2.439	2.267	2.454	2.634	2.597	2.515	2.695	2.84	2.806	2.842	2.961	2.859	2.859	2.89	2.775	2.98	2.739	2.783	2.622	2.822	2.879	2.749	2.975	2.955	2.56	2.274	2.354	2.409	2.239	2.41	2.356	2.462	2.371	2.348	2.345	2.342
ALX4	2.964	3.027	2.829	2.829	3.123	3.255	2.576	2.733	3.219	3.11	2.477	2.958	2.891	3.244	2.62	2.899	2.988	2.389	2.962	3.174	3.274	2.968	3.136	3.077	2.948	3.179	3.222	3.006	3.307	3.096	3.326	3.082	3.003	3.163	3.463	3.263	3.472	3.333	2.211	2.432	2.392	2.544	2.276	2.516	2.402	2.604	3.064	2.388	2.224
AMAC1	4.6605	4.3295	4.6535	4.9545	4.511	4.5085	4.235	4.594	4.7545	4.646	4.502	4.28	4.26	4.527	4.496	4.5075	4.339	4.4025	4.358	4.645	4.532	4.547	4.529	4.4315	4.468	4.4445	4.634	4.3075	4.604	4.3755	4.36	4.85	4.553	4.338	4.3775	4.973	5.126	4.7755	3.827	3.964	3.7785	3.7145	3.973	3.49	3.964	3.727	3.8835	3.6655	3.573
AMAC1L2	4.606	4.389	4.376	4.262	4.121	4.394	4.122	4.212	4.387	4.187	4.303	3.828	3.969	4.253	4.013	4.017	4.096	4.088	4.451	4.696	4.161	4.294	4.461	4.3	4.117	4.199	4.322	4.839	4.369	4.417	4.561	4.563	4.563	4.248	4.48	4.587	4.621	4.321	2.879	3.203	3.32	3.007	2.848	3.181	3.262	2.993	3.208	2.689	3.088
AMAC1L3	2.763	2.829	2.984	3.779	2.832	2.93	2.586	2.712	3.341	2.992	2.553	2.634	2.67	2.373	2.985	2.835	2.779	2.727	2.634	2.954	2.863	3.285	3.11	3.043	3.045	3.168	3.241	3.163	2.874	3.251	3.08	3.747	3.302	3.033	3.157	3.296	3.656	3.163	2.207	2.377	2.426	2.381	2.512	2.47	2.588	2.435	2.556	2.307	2.445
AMACR	4.1685	3.951	3.639	3.993	4.414	3.654	3.9555	3.9115	4.672	3.5655	4.347	4.126	4.459	3.91	4.34	4.4415	3.94	4.0425	4.258	4.5215	4.6275	4.2065	4.652	4.326	4.671	4.3685	4.1485	4.39	4.3235	4.199	4.366	4.4175	4.479	4.5025	4.425	4.7335	4.203	4.8685	3.1075	4.116	3.414	3.73	4.0885	4.098	3.8575	4.0815	3.4665	3.6495	4.101
AMACR /// C1QTNF3	3.23117	3.38733	3.12367	3.317	3.82683	3.21667	3.30667	3.41983	3.58517	3.2895	3.55533	3.54983	3.23917	3.55083	3.3725	3.8905	3.27767	3.53783	3.40333	3.8185	4.34167	3.8335	4.04183	4.0265	4.3235	3.92433	4.1055	3.85933	3.86217	3.80517	4.05883	3.92633	3.77567	3.904	3.86067	4.29983	3.85567	3.9345	3.554	3.6025	3.21217	3.46717	3.76983	3.64017	3.8335	3.62067	3.055	3.34767	3.43017
AMBN	2.039	2.082	2.303	2.194	2.155	1.984	2.113	2.152	2.017	2.299	2.227	2.3	1.98	2.292	2.321	2.152	2.108	2.08	2.177	2.819	2.598	2.964	2.785	2.604	2.777	2.706	2.605	2.835	2.618	2.726	2.615	2.675	2.681	2.576	2.671	2.748	2.821	3.09	2.366	2.23	2.389	2.11	2.3	2.408	2.462	2.471	2.124	2.416	2.337
AMBP	2.48633	2.293	2.296	2.26633	2.272	2.13667	2.24867	2.232	2.31933	2.37267	2.32667	2.155	2.27067	2.20133	2.16067	2.357	2.33367	2.38633	2.49033	2.81333	2.952	2.944	2.87067	2.97067	2.74433	2.88367	2.836	2.97	2.84067	2.93267	2.839	2.824	2.93967	2.78133	2.89	2.81767	2.868	2.964	2.36467	2.29533	2.41467	2.37333	2.49967	2.41767	2.375	2.34467	2.382	2.39367	2.23133
AMBRA1	3.71733	3.70867	3.854	3.95533	3.69733	3.399	3.67867	3.62233	3.501	3.76567	3.66633	3.729	3.766	3.56867	3.84767	3.588	3.69767	3.41267	3.811	3.97833	3.975	3.89433	3.918	3.899	3.976	3.88567	3.862	4.13167	4.08867	3.776	3.994	3.71833	3.99967	3.918	4.12533	3.915	4.09233	4.07867	3.20533	3.20833	3.17967	3.19933	3.227	3.27133	3.187	3.35967	3.06767	2.97367	3.05033
AMD1	7.914	8.42443	7.74486	7.50471	8.04271	7.86286	7.86286	7.70586	8.06629	7.22086	7.99043	7.94343	7.85686	7.84771	7.76986	8.39114	7.54271	7.97286	8.087	8.58871	8.40886	8.394	8.78314	8.16971	8.737	8.63	8.49786	8.45157	8.48729	8.53143	8.873	8.46729	8.12129	8.53329	8.609	9.01843	8.78429	8.73557	8.08971	8.79471	7.955	8.267	7.97986	8.391	7.90271	8.43014	7.864	7.646	8.10686
AMDHD1	3.827	4.32	3.837	3.629	4.429	3.545	4.714	4.651	3.803	4.449	3.653	3.877	4.16	4.76	3.744	4.147	3.728	3.014	4.933	4.757	5.142	4.39	5.517	5.853	4.663	3.515	4.72	4.16	4.988	4.289	5.049	6.235	6.45	6.13	5.596	5.115	4.696	4.171	5.897	5.029	5.168	4.097	5.087	4.912	5.921	3.477	5.247	5.25	5.267
AMDHD2	3.60425	3.3935	3.37975	3.4915	3.41025	3.659	3.5075	3.26225	3.954	3.431	3.1125	3.251	3.651	3.32925	3.26725	3.19475	3.00125	3.26	3.518	3.86525	3.58625	3.7185	3.498	3.62625	3.673	3.64	3.70125	3.38475	3.92	3.72625	3.63775	3.5405	3.56275	3.5125	3.8765	3.954	3.90925	3.80575	2.63175	2.991	2.5785	2.73875	2.719	2.807	2.953	2.948	2.96075	2.4015	2.761
AMELX	3.3535	2.995	3.2505	3.951	3.152	3.383	3.2875	3.3875	3.323	3.334	3.121	3.37	3.345	2.8845	3.4755	3.0545	3.069	3.381	3.062	3.6955	3.4745	3.544	3.4795	3.649	3.544	3.8325	3.5525	3.7785	3.576	3.7355	3.6495	3.683	3.5355	3.625	3.657	3.5795	3.667	3.797	2.8685	3.109	3.045	2.9695	2.948	3.212	3.245	3.125	3.231	3.1285	3.072
AMELY	2.93867	2.73133	2.86567	3.06067	2.87167	2.93833	2.68067	2.80933	2.89033	3.10233	3.04267	2.87933	2.843	2.904	2.82633	2.93267	2.794	2.934	3.11433	3.101	3.15	3.22067	3.136	3.142	3.04267	3.15733	3.19433	3.27433	3.09633	3.324	3.17233	3.21167	3.09367	3.15467	3.301	3.13567	3.22667	3.24767	2.388	2.42233	2.33533	2.328	2.46833	2.41333	2.479	2.55	2.584	2.405	2.24433
AMFR	4.8265	4.9705	4.9205	4.6325	5.125	6.0245	4.962	4.595	4.94	5.3895	5.1545	4.683	4.94	4.998	5.2025	5.1245	4.7485	5.2225	4.8115	5.4675	5.475	5.412	5.1495	5.405	5.5825	4.962	5.1285	4.9575	5.0295	5.046	5.182	4.868	5.1525	5.4675	5.2235	5.086	4.899	4.9255	4.407	4.361	4.0365	4.424	3.93	4.3805	4.3805	4.4295	4.0025	3.9035	4.307
AMH	2.59433	2.50567	2.45133	2.734	2.54167	2.68267	2.544	2.42	2.74133	2.62967	2.60667	2.45333	2.577	2.482	2.393	2.494	2.25133	2.54433	2.71	3.56333	3.31267	3.37967	3.252	3.299	3.339	3.31067	3.325	3.20567	3.414	3.386	3.30233	3.396	3.22467	3.18167	3.48367	3.46033	3.232	3.27533	2.594	2.67033	2.61933	2.495	2.619	2.748	2.533	2.837	2.697	2.41267	2.35033
AMHR2	2.96367	2.865	2.62733	2.87367	2.88733	2.94	2.74	2.83567	2.73167	3.02333	2.80633	2.86733	2.83633	2.75067	2.89533	2.89267	2.841	2.75167	2.96967	3.33067	3.17333	3.06333	3.23567	3.121	3.116	3.17467	3.246	3.13167	3.229	3.309	3.08167	3.18333	3.19033	3.11133	3.24167	3.18533	3.32967	3.356	2.61467	2.64	2.58167	2.48433	2.53333	2.60133	2.565	2.641	2.519	2.47967	2.529
AMICA1	8.051	8.429	7.733	7.945	8.1435	7.111	8.2795	7.817	8.319	7.656	8.213	8.065	8.128	8.1815	7.809	8.3295	7.4225	7.6915	8	7.95	7.9415	8.1465	8.3355	7.75	9.01	8.0785	8.3205	7.9335	8.5415	8.5415	8.2735	7.9025	7.373	8.1615	7.8655	8.5035	8.314	8.626	6.6005	8.0255	7.9075	8.1255	7.8495	7.5905	7.358	8.1585	7.448	8.0215	8.088
AMIGO1	3.966	3.304	4.045	3.511	3.678	2.579	3.627	3.682	3.915	3.488	3.834	4.259	4.061	3.487	3.462	3.927	3.975	3.23	3.577	3.569	4.054	3.102	3.263	3.354	3.721	3.426	3.449	3.25	3.699	3.818	3.401	3.32	3.76	3.658	3.654	3.892	3.314	3.234	3.747	3.083	3.027	2.951	3.311	2.731	4.014	3.776	3.802	4.049	3.652
AMIGO2	4.3724	4.314	4.3906	4.13	4.486	5.0714	5.0218	4.866	4.3298	4.4244	4.7456	5.089	3.867	4.9192	4.4334	4.4938	5.3148	4.5544	4.736	5.3772	5.4948	5.4616	5.2534	5.1632	4.5756	5.5776	4.8942	5.8078	4.89	4.5558	5.019	5.6246	5.795	5.7668	5.2752	5.5786	4.923	4.886	6.242	4.442	5.31	5.0202	5.2484	4.4544	5.9446	4.0938	5.6122	6.3426	5.572
AMIGO3	2.825	2.925	2.897	2.918	2.932	3.073	2.759	2.787	2.8565	3.0395	2.9525	2.77	2.938	2.7495	2.9135	2.8605	2.8965	2.893	3.0505	3.3755	3.231	3.222	3.3915	3.2675	3.323	3.174	3.234	3.18	3.2405	3.3345	3.374	3.2385	3.2735	3.2785	3.2495	3.2225	3.2805	3.5225	2.648	2.662	2.604	2.5175	2.5505	2.5805	2.6735	2.709	2.58	2.4925	2.568
AMMECR1	7.8045	7.6215	8.0015	8.001	7.7595	8.089	8.043	8.2365	7.7055	7.855	7.8645	7.978	7.985	7.7425	7.885	8.019	8.1085	8.063	7.823	8.7735	8.6965	8.7785	8.548	8.865	8.289	8.6815	8.708	8.9715	8.6255	8.3585	8.613	8.729	9.117	8.8135	8.872	8.591	8.6535	8.458	8.3805	7.7895	7.9945	7.8985	7.8375	8.23	8.08	8.029	8.582	7.97	8.309
AMMECR1L	5.8082	6.0546	5.8464	5.796	6.1116	5.991	5.9516	6.1698	5.855	5.953	5.9636	5.9866	5.979	5.947	5.9296	5.9064	5.7272	5.7618	6.0146	6.3468	6.2942	6.277	6.3312	6.2358	6.405	6.2428	6.2704	6.321	6.2626	6.1998	6.2506	6.1452	6.3022	6.2688	6.2934	6.3232	6.3464	6.5036	5.2304	6.0078	5.7164	6.1562	5.8994	6.1236	5.6328	6.0232	5.674	5.7796	5.8644
AMN	2.62433	2.672	2.56433	2.51033	2.519	2.68833	2.58933	2.47467	2.668	2.68733	2.55733	2.53467	2.596	2.47967	2.68867	2.65833	2.559	2.59633	2.65433	3.11933	2.98233	3.07467	3.15433	3.023	2.92867	2.93967	3.00433	2.983	3.00767	3.10867	3.16	3.099	2.973	2.842	2.96367	2.98767	3.10533	3.13267	2.576	2.67733	2.534	2.53433	2.474	2.52767	2.52133	2.552	2.593	2.514	2.52367
AMN1	5.741	6.063	5.517	5.4885	5.9735	5.8675	6.1725	6.0495	6.5115	5.408	6.1045	6.1025	5.7375	6.504	5.3235	6.33	6.156	6.398	5.777	6.3025	7.0195	6.5775	6.9005	6.134	7.1815	6.6565	7.139	6.9075	6.4585	6.543	6.34	7.5375	6.631	7.0175	6.579	7.143	6.9335	7.2665	7.088	6.8375	7.2855	5.9	7.212	6.5635	7.1255	5.95	6.79	7.515	7.5715
AMOT	2.8225	2.77525	2.596	2.89675	2.63625	2.89975	2.55125	2.92875	2.529	2.49125	2.60575	2.91875	2.675	2.258	2.74825	2.85675	2.67	2.65625	2.77925	2.92875	3.08575	3.0115	3.05925	3.0225	2.73175	2.977	3.00375	2.95325	2.9895	2.69975	3.0585	3.0055	3.1375	3.04825	2.98675	2.89	2.97825	2.8725	2.98525	2.58975	2.6965	2.7395	2.6785	2.9045	2.57325	2.51775	2.64275	2.73425	2.43225
AMOTL1	3.3115	3.127	3.145	3.1875	3.4235	3.065	3.0755	3.2335	3.0305	3.2425	3.095	3.08275	3.3115	3.06875	3.138	2.96075	3.2595	2.95775	3.2285	3.71125	3.33125	3.53125	3.61575	3.805	3.45225	3.66875	3.50475	3.58	3.72225	3.469	3.41875	3.36475	3.35275	3.462	3.78025	3.27125	3.71	3.47275	2.864	3.18825	2.7985	2.87875	2.9455	3.016	2.7005	3.10875	2.69525	2.903	2.655
AMOTL2	2.752	2.53533	2.68033	2.58867	2.60167	2.46667	2.479	2.533	2.56533	2.648	2.63433	2.554	2.606	2.584	2.53333	2.625	2.47133	2.39333	2.65633	3.24033	3.243	3.215	3.27967	3.18733	3.203	3.153	3.30067	3.224	3.136	3.324	3.353	3.24533	3.267	3.193	3.456	3.25867	3.51233	3.429	2.427	2.52167	2.49967	2.478	2.42467	2.54633	2.57	2.57767	2.47133	2.55667	2.48933
AMPD1	2.377	1.785	1.984	2.98	1.891	2.773	2.191	2.149	2.049	1.934	2.033	1.931	2.119	1.73	2.072	1.959	1.968	2.307	2.075	2.674	2.968	2.567	2.701	2.913	2.551	2.615	2.721	2.627	2.654	2.397	2.386	2.581	2.496	2.595	2.501	2.588	2.82	2.889	2.273	2.164	2.031	2.552	2.204	2.203	2.307	2.459	2	3.117	2.275
AMPD2	5.9905	6.51125	5.89925	5.95925	6.5395	7.00475	6.143	5.55225	6.716	5.58075	6.3645	5.877	6.20675	6.2895	6.26475	6.295	5.45575	6.2195	6.397	5.6485	6.05825	5.66075	6.38325	5.7285	6.3365	6.06925	5.80975	5.9695	6.124	6.2315	6.275	6.06925	5.332	5.789	5.9895	6.085	6.365	6.19275	4.5105	5.494	4.9235	5.0475	5.26	5.1035	4.73	5.35525	4.78025	4.526	4.90925
AMPD3	5.56871	5.61414	5.52157	5.204	5.76129	4.91357	5.66943	5.34129	5.402	5.19643	5.69671	5.66329	5.32286	5.665	5.45471	5.49629	5.273	5.78243	5.36571	6.23357	6.05357	5.56114	5.90529	5.88057	6.24386	5.57286	6.08471	5.76057	5.88329	6.114	6.30629	6.017	5.642	6.022	5.58971	5.93929	6.37186	6.122	5.07671	5.30586	5.10814	5.412	5.70143	5.24171	5.18371	5.35357	5.07657	5.735	5.51657
AMPH	3.3405	3.9125	3.647	3.809	3.9395	3.264	4.0335	3.887	3.5965	3.3525	3.7315	3.645	3.274	3.6615	3.7745	3.5995	3.7185	3.598	4.189	4.2285	4.21	3.944	3.8355	3.883	3.7755	4.1455	3.7915	4.17	3.8165	3.687	3.5935	3.8025	4.0725	3.6755	3.954	3.9835	4.021	3.8125	2.4915	3.017	3.7755	3.1635	2.962	3.115	3.1655	3.223	2.726	3.1685	3.148
AMT	3.88238	3.85375	4.24737	4.11775	3.99187	4.078	3.88137	3.9145	4.25625	4.08338	3.633	3.93463	4.1505	3.85562	3.87062	3.86625	4.07313	3.69263	3.76037	4.38625	4.24263	4.041	4.3705	4.384	4.15888	4.33887	4.30575	4.05638	4.3605	4.06337	4.31937	4.23912	4.337	4.266	4.51475	4.22912	4.02725	4.2265	3.15175	3.438	3.48612	3.59888	3.51788	3.73125	3.62113	3.71513	3.76437	3.4	3.50188
AMT /// NICN1	3.277	2.357	2.64	2.481	2.855	2.674	2.544	2.443	2.717	2.493	2.728	2.615	2.778	2.274	2.612	2.639	2.837	2.632	2.318	3.168	3.06	2.749	2.881	2.949	3.073	3.12	3.028	3.181	3.165	2.899	3.014	2.953	3.06	3.229	3.118	3.135	3.216	3.027	2.49	2.423	2.597	2.436	2.68	2.415	2.524	2.527	2.325	2.346	2.432
AMTN	2.267	2.22	2.122	2.34	2.119	2.351	2.198	2.219	2.276	1.981	2.09	2.048	2.146	2.192	2.215	1.9	2.006	2.039	2.37	2.698	2.858	2.732	2.792	2.724	2.804	2.743	2.818	2.637	2.656	2.698	2.912	2.837	2.842	2.85	2.758	2.752	2.953	3.031	2.632	2.467	2.279	2.541	2.49	2.229	2.441	2.371	2.376	2.502	2.515
AMY1A /// AMY1B /// AMY1C	7.187	7.253	7.433	7.489	7.802	8.152	7.613	7.389	7.856	7.284	7.826	7.245	7.201	7.905	7.299	7.4	7.298	7.316	7.191	8.8	8.572	8.677	8.619	8.892	8.162	8.514	8.662	8.756	8.839	8.919	8.569	9.162	8.773	8.957	8.899	8.62	8.623	8.844	8.259	8.06	8.247	8.216	8.326	8.177	8.282	8.034	8.385	8.722	8.459
AMY1A /// AMY1B /// AMY1C /// AMY2A /// AMY2B	4.857	4.86	4.6345	4.8135	4.9335	4.97	4.838	4.7485	4.7985	4.646	4.9125	4.8275	4.602	5.1095	4.5255	4.8875	4.681	4.704	4.9025	5.3855	5.304	5.529	5.375	5.281	5.247	5.1215	5.4205	5.267	5.5365	5.4725	5.2485	5.5125	5.5845	5.6545	5.428	5.2905	5.6545	5.7415	4.688	4.9725	5.0355	5.1215	5.1735	5.0855	4.823	4.7685	5.153	5.523	5.018
AMY2B	6.406	6.864	6.641	6.811	7.226	7.595	7	6.914	7.057	6.388	7.132	6.977	6.63	7.466	6.588	6.968	6.638	6.664	6.759	7.67	7.541	7.725	7.783	7.636	7.351	7.602	7.715	7.669	7.876	7.772	7.785	8.007	8.036	8.152	7.946	7.68	8.108	8.104	6.515	6.62	7.03	7.179	7.085	6.878	6.542	6.847	7.228	7.652	7.263
AMZ1	2.7715	2.7845	2.7405	2.7435	2.573	3.0285	2.5685	2.6645	2.694	2.511	2.855	2.6625	2.947	2.591	2.5425	2.4815	2.274	2.595	2.425	3.1605	3.312	2.808	3.018	3.0675	3.2185	3.079	3.1485	3.0545	3.1795	3.1615	3.0175	3.2175	3.1725	3.024	3.1285	3.216	3.117	3.0995	2.441	2.6425	2.6145	2.4795	2.4265	2.376	2.578	2.6295	2.6495	2.4465	2.425
AMZ2	8.373	8.564	8.738	8.645	8.646	8.667	8.716	8.645	8.788	8.736	8.527	8.682	8.615	8.556	8.64	8.442	8.459	8.46	8.314	9.141	9.206	9.191	9.175	9.379	9.121	9.104	9.283	9.206	9.148	9.006	9.248	9.106	9.498	9.146	9.257	9.187	9.047	8.856	8.467	8.652	8.73	8.754	8.38	8.648	8.853	8.724	8.676	8.791	8.735
ANAPC1	7.152	6.732	7.214	7.484	6.916	6.693	6.91	7.329	7.243	7.415	7.043	7.245	6.947	6.799	7.23	6.917	7.657	6.85	7.203	7.184	7.165	6.76	7.142	7.306	6.699	6.832	7.027	7.404	7.365	7.12	6.801	7.124	7.414	7.365	7.282	6.995	6.827	6.371	7.093	6.99	6.625	6.99	6.686	6.951	7.154	6.884	7.062	6.97	6.585
ANAPC10	4.145	3.861	5.177	3.765	4.803	4.541	4.782	5.392	4.978	4.213	4.868	5.101	4.357	4.596	5.032	4.339	5.576	5.413	4.583	5.017	5.729	6.348	4.94	5.759	5.2	5.582	4.946	5.5	4.495	4.791	5.012	6.216	5.744	6.198	5.088	5.344	5.729	6.633	6.827	5.198	6.255	5.211	6.141	5.66	6.695	3.889	6.071	6.793	6.762
ANAPC11	6.3632	6.5934	6.6676	6.5008	6.5068	6.516	6.4694	6.6206	6.6152	6.5746	6.5172	6.3028	6.8772	6.4662	6.6016	6.4388	6.623	6.5648	6.539	6.9092	7.071	6.88	6.9926	7.1144	7.0264	7.0222	6.978	6.9564	7.2308	7.1384	6.8796	6.9348	6.9298	6.9248	6.9308	7.0266	6.7506	6.9036	6.2522	6.763	6.4372	6.528	6.615	6.374	6.9186	6.6474	6.4012	6.0866	6.4186
ANAPC13	7.2965	7.5955	7.249	7.226	7.4565	7.409	7.387	7.2	7.708	7.286	7.6915	7.465	7.5285	7.6355	7.3855	7.351	7.351	7.33	7.5355	7.7715	7.785	7.5885	8.045	7.55	7.9715	7.736	7.7335	7.716	7.284	7.9115	7.79	7.6565	7.721	7.7255	7.9355	8.201	8.0655	8.176	8.151	7.951	7.7015	7.356	7.7065	7.4915	7.7595	7.5765	8	7.8385	7.8635
ANAPC16	8.9425	8.5175	8.8245	8.6275	8.6255	8.59	8.758	9.1875	8.8235	8.212	8.6645	8.9655	8.57	8.7685	8.555	8.7935	9.2315	8.6265	8.8695	9.8175	9.743	9.689	9.6735	9.6845	9.62	9.662	9.706	9.7145	9.747	9.427	9.749	9.845	9.167	9.856	9.8225	9.7225	9.514	9.696	9.593	9.034	9.379	9.165	9.3545	9.1925	9.857	9.152	9.5755	9.5865	9.483
ANAPC2	3.357	3.195	3.245	3.0365	3.3265	3.2525	3.2295	3.198	3.3665	3.2185	3.18	3.215	3.277	3.1065	3.329	3.1405	3.379	3.1055	3.2965	3.56	3.8915	3.679	3.766	3.7085	3.8205	3.6425	3.5945	3.613	3.846	3.728	3.761	3.458	3.9695	3.716	3.966	3.8935	3.5095	3.551	3.063	2.918	2.8315	2.858	2.9325	2.7645	3.2395	3.0425	2.617	2.871	2.7685
ANAPC2 /// LOC650621	2.646	2.645	2.926	2.709	2.674	2.61	2.659	2.561	2.685	2.672	2.579	2.668	2.974	2.434	2.861	3.018	2.519	3.21	2.634	3.479	3.255	2.933	3.202	3.184	3.431	3.491	2.973	3.195	3.185	3.234	2.963	3.354	2.972	2.996	3.267	3.485	3.034	3.017	2.692	2.929	2.728	2.45	2.431	2.787	2.622	2.902	2.579	2.619	2.836
ANAPC4	8.377	8.282	8.623	8.695	9.128	8.6	8.817	8.845	8.617	8.746	8.607	8.864	8.465	8.572	8.713	8.544	9.281	8.327	8.838	8.936	8.953	9.038	8.668	8.979	8.702	8.837	9.032	9.002	8.777	8.624	8.824	9.378	9.358	9.336	9.205	8.79	8.89	9.121	8.862	8.895	9.423	9.09	9.258	9.189	8.975	8.191	9.062	9.556	9.181
ANAPC5	9.2935	9.3015	9.6305	9.639	9.335	9.238	9.291	9.4635	9.615	9.47	9.2015	9.3965	9.605	9.1185	9.565	9.0735	9.677	9.007	9.391	9.992	9.8585	9.693	9.703	10.144	9.5975	10.038	9.8715	9.815	10.1615	9.8105	9.932	9.6925	10.2605	9.862	10.1785	9.791	9.6955	9.77	8.6925	9.409	9.169	9.5445	9.0165	9.4245	9.1475	9.504	9.3645	8.9195	8.8025
ANAPC7	5.41233	5.69167	5.779	5.613	5.62	5.461	5.481	5.838	5.80767	5.48867	5.44133	5.82	5.66733	5.66167	5.60933	5.46367	6.11567	5.69933	5.54367	6.61633	6.86067	6.843	6.64967	6.68267	6.40933	6.49167	6.78333	6.565	6.629	6.59633	6.51567	6.551	6.856	6.611	6.69433	6.74733	6.50733	6.57567	6.02767	5.66633	5.86633	5.74233	5.85667	5.79167	5.91	5.61433	5.68733	5.751	5.72333
ANG	4.325	5.154	5.849	3.809	5.326	4.831	4.218	4.835	4.805	5.315	4.907	4.286	5.346	4.86	4.168	4.687	5.063	4.833	5.354	5.967	4.972	5.827	5.851	5.36	5.687	5.183	4.58	4.675	5.66	5.332	5.456	4.451	5.341	4.514	5.287	5.645	4.616	4.942	3.366	4.563	4.627	4.151	3.846	4.075	3.698	4.863	3.695	3.367	3.729
ANGEL1	4.3485	4.092	4.5805	4.349	4.3445	3.883	4.3525	4.345	4.2285	4.4315	4.259	4.3385	4.4155	4.119	4.1805	4.2935	4.5295	4.1505	4.366	4.7895	4.755	4.673	4.6665	4.9065	4.6145	4.8085	4.7345	4.7525	4.7675	4.7175	4.7495	4.467	4.7575	4.752	4.932	4.7335	4.6865	4.626	4.3195	4.3715	4.401	4.6485	4.5105	4.5635	4.691	4.5185	4.7555	4.4845	4.2575
ANGEL2	5.81833	6.20467	5.88033	5.22633	6.255	6.26867	5.90867	6.20567	5.68133	5.897	6.06833	6.38467	5.821	6.20033	5.978	6.02233	6.63233	6.15733	5.85833	6.495	6.823	7.57533	6.438	6.746	5.985	6.82233	6.437	6.8	6.35667	6.47833	6.654	6.886	6.95833	6.852	6.47333	6.458	6.43767	6.71533	7.159	5.832	7.046	6.39433	6.60767	6.058	6.95567	5.85233	7.34833	7.11433	7.06767
ANGPT1	3.17425	3.798	3.11425	2.8735	2.9555	3.26475	3.2525	3.15625	3.3115	3.03125	3.09225	3.322	3.257	3.1565	2.97825	3.29325	3.44675	3.29325	3.27	3.63275	4.41425	4.28875	4.43075	4.0205	3.826	4.0405	3.4895	4.50625	3.985	5.02825	3.7915	5.12475	3.915	4.321	4.24625	4.207	3.61525	4.5285	4.68625	5.1375	4.008	3.47275	3.954	3.23	4.3035	3.28575	3.71525	4.2735	4.4305
ANGPT2	3.80667	3.43967	3.349	3.52867	3.23467	3.473	3.44267	3.35867	3.28	3.296	3.63567	3.41967	3.14667	3.53867	3.459	3.27367	3.37667	3.571	3.34533	3.612	3.66533	3.76533	3.473	3.66633	3.40467	3.73833	3.89833	3.69433	3.70367	3.56133	3.653	3.56333	4.165	3.846	3.74867	3.69	3.744	3.593	2.74533	3.095	3.14467	3.338	2.84467	3.385	2.989	3.27433	3.09367	3.06467	2.84033
ANGPT4	2.3955	2.4335	2.294	2.468	2.3	2.2675	2.3305	2.0955	2.5	2.4335	2.32	2.0345	2.2465	2.215	2.231	2.4185	2.38	2.2575	2.4035	2.847	2.7525	3.021	2.851	2.865	3.0635	2.957	3.1705	2.966	2.988	3.0085	2.935	2.909	2.9695	2.77	3.098	3.0115	3.048	2.9435	2.316	2.385	2.5035	2.03	2.414	2.2805	2.511	2.285	2.29	2.332	2.118
ANGPTL1	5.15467	4.544	4.229	4.55133	4.37367	5.29567	5.11267	5.084	4.327	4.35667	4.284	4.80633	4.469	4.246	4.59767	4.91367	4.57733	5.57967	4.17267	4.557	4.89533	4.929	4.53033	4.839	5.84067	5.266	5.625	5.409	4.95867	4.925	4.93633	5.11567	6.08833	5.687	4.777	5.09767	5.08933	5.17167	4.24667	4.68	4.97133	5.54967	4.7	5.51733	4.475	4.66367	4.73433	4.42767	4.91633
ANGPTL2	2.48033	2.63767	2.51833	2.56567	2.45133	2.43467	2.482	2.38333	2.421	2.52933	2.54067	2.44733	2.466	2.39933	2.40867	2.33567	2.427	2.487	2.47733	3.11367	2.91167	2.99933	2.93733	3.05433	2.996	2.812	2.97867	3.02	3.02233	2.98767	2.93867	2.93067	2.84733	3.089	3.10333	3.06733	3.07933	3.00567	2.457	2.55467	2.47767	2.688	2.54067	2.52467	2.367	2.594	2.38133	2.39633	2.39733
ANGPTL3	2.008	2.06	1.9655	2.454	1.8615	2.6035	2.0525	1.9775	1.993	2.049	2.104	1.9875	2.1065	2.0475	1.987	1.9405	1.959	2.042	1.969	2.5975	2.527	2.582	2.6215	2.555	2.622	2.8105	2.7305	2.8285	2.6115	2.5355	2.6905	2.8155	2.755	2.8635	2.6355	2.583	2.8435	2.9115	2.324	2.1255	2.145	2.3545	2.387	2.213	2.396	2.2225	2.3415	2.202	2.227
ANGPTL4	2.073	2.258	2.357	2.481	2.188	2.462	1.989	2.273	2.312	2.268	2.199	2.021	2.061	2.228	2.219	2.268	2.347	2.187	2.583	3.092	2.704	2.832	3.073	3.029	2.759	2.934	2.915	2.755	2.812	3.123	3.116	2.997	2.9	2.984	3.229	2.951	2.788	2.871	2.306	2.142	2.486	2.175	2.365	2.298	2.338	2.485	2.557	2.414	2.173
ANGPTL5	1.962	1.954	1.757	1.91	1.818	1.87	1.785	1.789	1.676	1.864	1.81	1.818	1.904	1.969	1.956	1.754	1.868	2.181	2.077	2.662	2.684	2.556	2.542	2.554	2.701	2.496	2.521	2.741	2.417	2.453	2.482	2.628	2.564	2.549	2.565	2.485	2.667	2.654	2.696	2.136	2.289	2.043	2.304	2.164	2.519	2.127	2.243	2.396	2.323
ANGPTL6	4.123	4.057	4.487	4.607	4.171	4.27	4.276	3.974	4.155	4.332	4.283	4.196	4.405	4.068	4.246	4.217	4.148	4.046	4.293	4.418	4.718	4.427	4.57	4.874	4.57	4.954	5.021	4.445	5.078	4.862	4.746	4.654	5.138	4.445	4.553	4.711	4.541	4.317	4.06	4.115	4.625	3.609	3.938	3.315	4.136	4.069	3.825	3.705	3.808
ANGPTL7	3.784	3.654	3.348	3.768	3.892	3.827	3.75	3.469	4.022	3.171	3.401	3.69	3.562	3.622	3.619	3.95	3.555	3.942	3.898	3.925	3.436	3.651	3.923	3.702	3.991	3.713	3.732	3.957	3.524	3.706	3.782	3.708	4.128	3.546	3.858	3.994	3.86	3.722	2.724	3.133	3.3	3.197	3.149	3.187	3.005	3.565	2.958	2.847	3.218
ANK1	5.38429	5.15614	5.86143	5.19871	5.26671	6.04186	5.20043	4.21043	5.50386	7.61914	6.00829	4.13871	5.86529	5.80343	6.51743	6.60829	5.521	6.78071	5.041	6.955	4.768	7.52671	5.00514	5.87371	6.59429	5.997	5.72829	6.74414	5.49586	6.85186	5.289	6.75629	5.91086	5.71871	5.01871	5.157	5.297	4.50929	4.01857	5.235	4.27429	5.47057	3.94286	5.30871	4.05786	5.04414	4.96471	4.19314	4.50057
ANK2	2.8788	2.4462	2.4824	2.9314	2.3154	2.5334	2.4466	2.5256	2.7778	2.4942	2.4626	2.552	2.6052	2.4226	2.443	2.4128	2.3602	2.4588	2.4654	2.9158	2.8628	2.8238	2.799	2.9176	2.8654	2.7864	2.8406	3.031	2.9352	2.9602	2.88	3.052	2.8916	2.8496	2.9956	2.842	3.023	2.9824	2.4254	2.3818	2.5126	2.3876	2.4182	2.4712	2.4978	2.364	2.4084	2.3876	2.4036
ANK3	5.02025	4.93425	5.617	6.16025	4.5725	3.158	5.37625	5.271	4.42525	4.72025	5.28225	5.6255	3.877	4.99275	5.3025	4.63125	5.70425	5.1245	5.398	5.16175	4.705	5.06525	5.093	5.489	4.59175	4.65375	5.049	5.50025	5.34325	4.78225	4.893	5.092	5.80075	5.2715	5.09125	5.0575	4.9225	3.9195	4.47575	3.93125	4.47025	4.4485	4.0215	4.73	4.02025	4.42075	4.92475	4.25725	4.537
ANKAR	3.00667	3.14733	2.84	3.05133	2.92667	2.866	2.94067	2.89	2.91633	2.95233	2.99833	3.134	2.92367	2.72733	2.95867	3.10767	3.00967	2.97333	2.95467	3.359	3.53333	3.473	3.39033	3.468	3.67467	3.39667	3.26667	3.385	3.385	3.31833	3.35967	3.36733	3.71933	3.611	3.44833	3.424	3.344	3.43033	3.32767	3.10267	3.159	3.08367	3.09367	3.133	3.144	2.995	3.05733	3.70567	3.28133
ANKDD1A	5.01567	5.42767	5.10533	5.42667	5.962	5.67433	5.588	5.046	5.48033	5.61167	5.54333	5.59167	5.64133	5.714	5.51533	5.145	5.57333	5.034	5.612	6.53567	6.19933	6.448	6.451	6.44767	6.65767	6.49767	6.88533	6.06333	6.403	6.57533	6.25133	6.08133	6.72667	6.18667	6.189	6.496	6.757	6.17133	4.61467	5.15367	5.31733	5.471	5.103	5.58	4.82267	5.31367	5.00467	5.85367	5.56033
ANKFN1	2.26	2.17	1.952	2.114	2.22	2.963	2.16	2.163	2.176	2.22	1.944	1.97	2.188	2.069	2.036	2.133	2.057	1.926	2.261	2.698	2.794	2.741	2.878	2.886	2.648	2.871	2.837	2.87	2.552	2.651	2.694	2.884	2.844	2.802	2.688	2.648	2.693	2.895	2.37	2.132	2.031	2.155	2.289	2.221	2.271	1.985	2.199	2.295	2.158
ANKFY1	5.6395	5.823	5.12	5.62917	5.76233	4.33167	5.72517	5.24533	5.35083	5.514	5.27367	5.56867	5.7125	5.634	5.7135	5.3915	5.37667	5.49733	5.33467	5.62017	5.70683	5.701	6.073	5.57183	5.845	5.929	5.95867	5.7755	6.17883	6.20467	5.79983	5.3075	6.30217	5.71833	5.7125	5.822	5.716	5.59233	4.06033	5.1665	5.01967	5.75483	4.82183	5.449	4.68367	5.7125	4.6315	4.56533	4.832
ANKH	5.79625	5.605	6.19875	5.95975	5.924	5.582	6.01425	5.814	5.9655	6.52975	5.8985	6.0745	5.9975	5.93325	6.524	6.61575	5.8955	6.1505	5.9285	7.01525	6.011	7.21775	5.825	5.996	6.27075	6.08825	6.0345	6.70425	6.127	6.4555	6.0665	6.2875	6.22225	6.08175	6.174	6.10425	6.23075	5.81825	5.28825	5.96825	5.37925	6.02475	5.23475	5.663	5.6645	5.7575	5.697	5.47375	5.6155
ANKH /// TSPAN3	9.037	8.876	8.477	8.341	8.703	8.459	8.66	8.782	8.246	8.772	8.35	8.904	8.806	8.839	9.094	9.035	8.754	9.07	8.197	8.597	9.262	8.893	8.601	9.227	9.581	9.066	9.185	8.829	8.801	8.981	8.925	8.652	9.44	9.683	8.747	9.253	8.867	8.944	9.408	8.614	8.564	9.53	8.445	9.202	8.713	8.835	7.845	8.632	9.157
ANKHD1	6.2275	6.629	5.968	5.9885	6.3465	8.538	6.249	5.92	6.443	6.4035	6.1915	6.058	6.1525	6.008	6.352	6.2885	5.936	5.992	5.929	6.524	6.7415	6.884	6.8765	6.949	6.837	6.7935	6.9415	6.764	6.7245	6.831	6.588	6.375	6.7275	6.592	6.5625	6.6815	6.868	6.883	6.067	6.3895	5.8865	6.4825	6.0395	6.3865	5.7875	6.537	6.857	5.579	5.894
ANKHD1 /// ANKHD1-EIF4EBP3	8.4525	8.704	8.4745	8.64275	8.61025	8.298	8.48875	8.4435	8.61225	8.49425	8.545	8.526	8.5365	8.35725	8.57975	8.3875	8.518	8.413	8.432	8.5785	8.70475	8.556	8.80675	8.772	8.87125	8.72625	8.81775	8.94025	8.8875	8.7375	8.846	8.55975	8.8945	8.82525	8.86125	8.8235	8.9895	8.64875	7.74075	8.306	8.1705	8.6235	7.9535	8.491	7.8415	8.61475	8.0665	8.042	8.07975
ANKHD1-EIF4EBP3 /// EIF4EBP3	7.693	7.902	7.648	7.587	7.637	6.878	7.595	7.435	7.919	7.365	7.244	7.472	7.941	7.458	7.599	7.464	7.355	7.336	7.928	7.921	8.006	7.284	8.203	7.866	7.969	7.934	8.106	7.756	8.305	8.101	8.226	7.504	7.566	7.846	8.086	8.124	7.949	7.886	7.009	7.508	7.196	7.423	7.48	7.299	7.259	7.866	7.554	6.582	6.718
ANKIB1	6.247	6.38067	6.43933	6.05533	6.58267	6.81633	6.99633	6.89933	5.595	6.41333	6.49633	6.88867	6.02767	6.67467	5.989	6.47767	6.85233	6.66533	6.541	7.35333	7.58067	7.70633	7.43567	7.75967	6.922	7.17633	7.37933	7.24767	7.14733	6.992	7.27167	7.58067	7.61967	7.60333	7.272	7.573	7.13333	7.448	7.67367	6.444	7.27667	7.174	7.14767	6.95	7.61567	6.365	7.27833	7.57267	7.57967
ANKK1	2.884	2.654	2.993	3.117	2.344	2.944	2.551	2.658	2.752	2.675	2.322	2.291	2.732	2.688	2.804	2.427	2.627	2.442	2.378	3.65	3.01	3.06	3.115	3.295	3.15	3.456	3.432	3.308	3.453	3.195	3.237	3.443	3.251	3.104	3.472	3.088	3.309	3.415	2.796	2.768	2.881	2.631	2.585	2.678	2.771	2.974	2.903	2.569	2.584
ANKLE1	3.202	3.1455	3.09917	3.21317	3.08417	3.22883	3.10967	3.05883	3.1125	3.10717	3.1005	3.02433	3.03483	3.13867	3.09467	3.07633	2.94683	3.1755	3.182	3.73867	3.51217	3.57367	3.64333	3.5665	3.537	3.51533	3.73817	3.65183	3.5755	3.6835	3.52	3.54833	3.422	3.5495	3.64433	3.612	3.66483	3.59283	2.84217	2.88183	2.76717	2.9035	2.9105	2.85717	2.96733	2.85	2.88083	2.80317	2.71183
ANKLE2	6.76725	6.82475	6.74925	6.62325	6.70025	7.22325	6.89275	6.73075	6.58375	6.38025	6.73625	6.76775	6.57425	6.85125	6.56075	6.7365	6.889	6.7305	6.64725	6.99425	7.185	6.9725	7.188	7.0395	7.15525	7.29	7.16575	7.06575	7.2975	7.063	7.14525	7.197	7.26275	7.179	7.2345	7.23575	7.06675	6.81725	6.64825	6.43925	6.386	6.37	6.2595	6.48275	6.17825	6.2785	6.097	6.29375	6.23875
ANKMY1	3.182	3.29967	3.40067	3.39133	3.237	3.49	3.36533	3.55467	3.23833	3.47833	3.42633	3.142	3.548	3.24067	3.43033	3.18767	3.38467	3.17233	3.24167	3.59467	3.47933	3.60833	3.66267	3.67	3.55867	3.61633	3.88467	3.56	3.663	3.48767	3.71267	3.53633	3.79833	3.65133	3.70967	3.579	3.65933	3.672	2.72167	2.67567	2.71367	2.97767	2.95167	2.94133	2.84433	3.03167	2.97567	2.83333	2.853
ANKMY2	6.189	6.102	6.51	6.54	6.507	6.796	7.264	6.56	6.369	6.647	6.506	6.728	6.342	6.695	6.673	6.448	6.575	6.381	6.354	7.997	8.4	7.891	7.522	7.803	6.828	7.505	7.811	8.038	7.212	6.778	7.531	8.222	8.297	8.045	7.729	7.422	6.409	7.672	8.44	7.108	7.738	7.269	8.032	6.781	7.816	6.725	7.361	8.189	7.626
ANKRA2	4.2115	4.919	4.8135	4.1785	5.454	5.908	5.3175	5.304	4.7145	4.9215	4.7915	5.592	4.051	5.6655	4.259	5.1095	5.602	5.456	5.7865	5.337	5.915	5.51	5.7235	5.5645	5.044	5.093	4.906	5.6495	4.8025	4.5485	5.011	6.2235	5.5385	5.895	5.2785	5.632	5.048	5.955	6.941	5.1855	6.059	5.375	5.8955	5.067	6.4085	3.898	5.9875	7.1765	6.466
ANKRD1	2.241	2.166	2.128	2.921	1.946	1.818	2.099	2.047	2.196	1.963	2.336	2.115	1.948	2.259	2.06	1.994	2.214	1.854	1.867	2.781	2.863	2.519	2.727	2.71	2.709	2.775	2.685	2.698	2.813	2.729	2.666	3.003	2.871	2.62	2.734	2.669	2.829	3.331	2.428	2.333	2.657	2.546	2.496	2.399	2.321	2.185	2.488	2.715	2.438
ANKRD10	9.4	9.4735	9.5595	9.1615	9.7335	10.16	9.8015	9.7965	9.422	9.46	9.595	9.9335	9.4035	9.814	9.223	9.4615	9.716	9.6065	9.7305	9.81	10.11	10.0385	9.9655	10.1345	9.558	9.812	10.092	9.948	9.7775	9.6565	9.9455	9.8355	10.1635	10.1525	10.1375	10.0585	10.0425	10.3095	9.62	9.7995	9.8315	9.7815	9.966	9.903	9.8105	9.415	10.001	10.257	9.9625
ANKRD11	7.18	7.50133	7.009	7.40567	7.34967	7.145	7.09567	7.01367	7.349	7.217	7.24933	7.19633	7.20233	7.11733	7.327	7.23233	7.04833	7.04467	7.17133	7.028	7.24333	6.90367	7.298	7.03	7.56367	7.349	7.10767	7.155	7.53533	7.316	7.38467	6.78133	7.48933	7.10467	7.23167	7.409	7.19933	7.00667	6.11567	6.71133	6.47367	6.626	6.55433	6.51667	6.321	6.89567	6.07667	6.18767	6.391
ANKRD12	6.974	6.91725	6.747	6.403	6.846	6.87675	7.2215	7.19125	6.57075	6.503	7.0865	7.13425	6.68025	7.139	6.688	7.2435	6.9675	7.41125	6.80375	7.11725	7.6725	7.76925	7.1795	7.07825	7.67375	7.42775	7.4235	7.62725	6.9045	7.28725	7.03225	8.0675	7.2845	7.74125	7.05525	7.50825	7.0525	7.46775	8.0485	7.278	7.688	7.45575	7.77625	7.531	7.77375	6.693	7.39725	8.0705	8.01825
ANKRD13A	8.29533	8.44367	7.96233	8.17467	8.22867	8.20867	8.15333	7.96533	8.215	7.87633	8.21633	8.12833	8.21967	8.188	8.08633	8.162	7.91433	8.15933	8.196	8.35733	8.344	8.42433	8.62367	8.354	8.57767	8.32	8.57767	8.463	8.44433	8.61	8.505	8.42267	8.371	8.38633	8.34367	8.54933	8.655	8.54967	7.72567	8.11067	7.86167	7.85167	7.898	8.014	7.656	7.95233	8.07567	7.84367	7.97867
ANKRD13B	3.462	3.496	4.156	3.993	3.509	3.561	3.663	3.77	4.547	3.672	3.725	3.536	4.221	3.357	3.384	3.684	4.059	3.512	3.128	4.824	4.912	4.39	4.388	4.37	3.962	4.615	4.307	4.426	4.499	4.157	3.851	3.821	5.157	3.768	4.379	4.103	4.314	4.085	2.559	2.761	3.493	2.985	2.623	2.693	2.972	3.047	2.881	3.004	2.758
ANKRD13C	4.39057	4.17157	4.56343	4.03429	4.46657	4.67571	5.00229	5.13771	4.19329	4.18229	4.60414	4.876	4.29657	4.74157	4.28129	4.57771	5.14029	4.84829	4.41729	5.56943	5.76586	5.86986	5.64671	5.80957	5.07314	5.39957	5.59986	5.78671	5.27971	4.96729	5.28429	6.02357	5.95329	6.03057	5.78543	5.53257	5.389	5.23571	6.38457	4.66514	5.71114	5.22414	5.63714	5.032	5.82414	4.02443	5.50371	6.20843	6.113
ANKRD13D	6.2785	6.087	5.7965	5.757	6.065	6.0665	6.264	5.7135	6.57	5.619	6.22	5.6885	6.1385	6.1865	6.2945	6.3205	5.5085	6.2185	6.1505	5.3385	5.633	5.542	5.6495	5.1615	6.1415	5.8	5.7235	5.3605	6.22	6.327	5.834	5.707	5.6535	5.2255	5.3435	5.979	5.0625	5.8455	5.0335	5.399	4.768	4.8965	5.684	4.754	4.916	4.926	4.772	4.167	4.8175
ANKRD16	3.0635	3.1205	2.765	3.4355	2.9055	3.14	2.661	2.799	3.2305	2.8935	2.888	2.8665	3.215	2.836	2.8685	2.8485	2.823	2.9595	2.9335	4.27	4.426	3.9625	4.119	4.357	4.0575	4.336	4.176	4.4555	4.222	4.3415	4.246	4.2105	4.3045	4.252	4.219	4.443	4.201	4.4305	2.875	2.966	2.998	2.967	3.125	2.981	3.1735	2.9855	3.261	2.9845	2.9135
ANKRD17	7.886	7.998	7.9312	7.9718	8.0482	7.902	8.0046	8.0274	7.8884	7.9834	7.7928	8.047	7.7688	7.8788	7.9524	7.814	8.0724	7.8704	7.941	8.5144	8.4612	8.4898	8.6954	8.8018	8.4492	8.4956	8.5868	8.633	8.4862	8.4238	8.6512	8.5404	8.6658	8.5526	8.6526	8.4648	8.5378	8.1862	8.329	7.7988	7.8694	8.11	7.807	8.1368	7.643	7.994	8.3702	8.0742	7.9758
ANKRD18A	2.461	2.294	2.302	3.0965	2.278	2.069	2.3665	2.3295	2.426	2.209	2.3495	2.303	2.4805	2.3655	2.4125	2.335	2.2145	2.4615	2.4515	2.787	2.806	2.7795	2.8935	2.8035	2.813	2.9015	2.858	2.938	2.889	2.928	2.747	2.9965	2.728	2.8995	2.867	2.773	3.0435	2.9385	2.438	2.3105	2.427	2.259	2.539	2.519	2.5995	2.389	2.3315	2.553	2.3645
ANKRD19	3.96975	3.88175	3.88975	4.04825	3.958	4.00675	4.04025	3.95125	3.88175	3.77225	3.8565	4.089	3.76625	3.83725	3.7915	3.87325	3.922	3.93275	3.9285	4.641	4.6785	4.7505	4.72225	4.7155	4.6035	4.6575	4.735	4.78475	4.617	4.599	4.6885	4.8455	4.91925	4.72075	4.82725	4.56075	4.63575	4.757	4.0975	4.098	4.15375	4.03	4.06975	4.1555	4.14075	3.9895	4.09	4.36625	4.027
ANKRD2	3.064	2.898	2.967	3.174	2.516	2.978	2.89	2.6	2.99	2.412	2.673	2.835	2.695	3.014	2.665	2.856	2.742	2.308	2.492	3.234	2.97	3.232	3.393	3.209	3.578	3.223	3.283	3.234	3.365	3.278	3.25	3.56	3.011	3.272	3.203	3.094	3.445	3.652	2.51	2.501	2.189	2.565	2.381	2.468	2.589	2.549	2.612	2.367	2.548
ANKRD20A1 /// ANKRD20A2 /// ANKRD20A3 /// ANKRD20A4	2.178	2.284	2.355	2.4	2.297	2.417	2.461	2.05	2.145	2.148	2.263	2.136	2.175	2.28	2.348	2.066	2.147	2.081	1.952	2.706	2.791	2.832	2.853	2.71	2.811	2.81	2.642	2.687	2.631	2.587	2.811	2.899	2.794	2.76	2.766	2.783	2.796	2.696	2.523	2.18	2.3	2.104	2.212	2.211	2.58	2.254	2.241	2.628	2.256
ANKRD20A5	6.652	6.6	7.607	7.823	6.754	6.055	6.821	7.53	7.675	7.298	7.516	7.648	7.119	7.091	7.49	7.173	7.687	6.23	7.544	7.888	7.098	7.707	7.541	7.723	6.941	7.614	7.791	7.943	7.512	6.672	8.262	7.599	8.692	8.032	7.97	7.452	7.996	7.288	5.471	7.233	6.743	7.466	6.171	7.214	5.392	6.486	7.991	7.061	7.516
ANKRD22	4.176	4.737	3.257	4.5975	3.89	3.8435	3.489	3.895	4.53	4.177	3.75	3.4005	4.8235	4.499	3.6565	3.5495	3.969	4.6145	3.4055	3.7665	3.726	6.063	6.698	4.431	4.913	4.426	5.427	4.1165	4.649	5.508	4.6095	4.5145	4.6365	4.1825	3.5555	4.1855	4.9985	4.113	3.5425	3.8885	5.352	3.6935	4.3025	3.6865	5.0175	3.828	3.5865	4.169	4.4785
ANKRD23 /// ANKRD39	3.3195	3.0005	2.994	3.337	3.257	3.4555	3.079	3.2825	3.695	3.5955	3.3585	3.2275	3.376	3.0985	3.064	3.1935	3.213	3.048	3.2885	3.9695	4.043	3.706	3.6935	3.6745	3.5985	3.65	3.9595	4.051	3.8785	3.6855	3.824	3.8445	3.7155	3.484	3.9685	3.739	3.909	3.7805	2.9245	2.905	2.6765	2.8355	2.717	2.8495	2.97	2.7945	2.8425	2.7345	2.808
ANKRD24	2.832	3.025	3.366	3.175	2.818	3.525	2.865	3.253	2.871	3.446	3.163	2.773	3.14	2.49	2.616	2.695	2.818	3.29	2.901	3.611	3.394	3.449	3.352	3.356	3.737	3.374	3.286	3.948	3.344	3.708	3.399	3.905	3.506	3.417	3.627	3.172	3.592	3.665	2.13	2.897	2.559	2.422	2.392	2.661	2.528	3.062	2.452	2.741	2.484
ANKRD26	3.2735	3.4325	3.456	3.065	3.236	3.2795	3.538	3.8375	3.112	3.2005	3.16	3.706	2.9505	3.8535	3.4765	3.4495	3.824	3.0555	3.2615	3.5395	4.2235	3.9045	3.758	4.1615	3.462	3.907	3.4915	3.7325	3.6245	3.8305	4.0085	4.714	3.566	4.039	3.804	3.758	4.054	3.573	4.79	3.438	4.0145	3.368	4.0765	3.553	4.277	3.115	4.138	4.766	4.4175
ANKRD27	7.796	7.828	7.892	7.746	8.142	7.738	7.967	8.007	7.76	7.981	7.632	7.913	7.79	8.102	7.942	7.786	7.811	7.83	7.742	8.091	8.452	8.301	8.509	8.148	8.235	8.584	8.45	8.298	8.278	8.262	8.475	8.252	8.384	8.459	8.186	8.61	8.014	8.15	8.177	7.888	7.847	8.061	7.832	8.126	8.125	8.042	7.632	7.867	8.057
ANKRD28	4.83075	4.51925	4.36625	4.25275	4.5205	5.4225	4.945	4.735	4.60525	4.61125	4.5245	4.872	4.1055	4.769	4.673	4.75	4.50175	4.96825	4.65	5.17875	5.4555	5.24125	5.01425	5.1565	5.08375	5.224	5.5095	5.38525	4.7245	4.85	5.241	5.5865	5.4215	5.2845	4.94725	4.90625	4.994	5.288	4.98	4.7865	4.981	4.80775	4.7625	4.88725	5.39275	4.4535	5.0425	5.0175	4.9315
ANKRD29	2.25	2.21	1.979	2.358	2.222	2.463	2.266	2.158	2.058	2.187	2.216	2.051	2.722	2.045	2.194	1.998	2.182	2.501	2.39	3.031	3.036	3.076	2.891	3.041	2.967	2.965	3.097	2.95	2.829	2.718	2.949	3.014	3.019	3.052	2.935	2.941	2.906	3.26	2.761	2.495	2.858	2.776	2.751	2.573	2.731	2.522	2.449	2.597	2.741
ANKRD30A	1.852	2.11	2.198	2.059	2.176	1.917	2.034	2.338	2.265	2.054	2.092	2.018	2.085	2.101	2.207	2.016	1.989	2.044	2.163	2.747	2.692	2.745	2.889	2.939	2.969	2.938	2.787	2.799	2.704	2.835	3.056	2.838	2.985	2.95	2.763	2.875	2.807	3.014	2.555	2.634	2.722	2.287	2.53	2.425	2.721	2.51	2.406	2.597	2.504
ANKRD30B	2.169	2.129	1.964	2.122	1.957	2.266	2.251	1.949	2.476	2.085	2.146	2.25	2.208	2.108	1.912	2.094	2.017	2.147	2.205	2.711	2.955	2.564	2.513	2.59	2.713	2.541	2.719	2.419	2.59	2.626	2.534	2.635	2.588	2.749	2.553	2.615	2.483	2.693	2.602	2.453	2.313	2.771	2.461	2.339	2.373	2.39	2.843	2.379	2.447
ANKRD32	5.57375	5.991	5.3535	5.0375	6.058	5.874	6.3235	6.129	5.4	5.32475	6.19875	5.978	5.53175	5.988	5.91575	5.81075	6.1455	6.4355	5.77725	6.347	7.118	6.91475	6.59825	5.7845	6.96025	5.888	6.7425	7.02725	6.5045	6.51975	6.18075	7.26625	6.85075	6.6765	6.5295	6.5695	6.17475	6.949	7.853	6.5775	7.0665	6.049	6.78675	6.48925	7.12725	5.57425	7.0605	7.50725	7.50075
ANKRD33	2.6915	2.6	2.707	2.729	2.5975	2.5995	2.514	2.6555	2.431	2.562	2.519	2.624	2.5545	2.465	2.525	2.5745	2.5545	2.4865	2.5595	3.2965	2.975	2.912	2.929	3.0095	2.991	2.9835	2.9335	3.024	3.111	3.0585	2.9695	3.039	3.08	3.0845	3.032	2.9695	3.312	2.986	2.354	2.5625	2.4655	2.275	2.336	2.31	2.475	2.352	2.2995	2.2995	2.2765
ANKRD34A	3.481	3.351	4.074	4.328	3.562	3.832	3.477	3.718	3.575	4.306	3.715	3.805	3.761	3.298	3.837	3.556	3.474	3.621	3.975	4.357	4.063	4.38	4.23	4.284	3.69	4.414	4.51	4.166	4.606	4.114	4.479	4.33	4.656	3.914	4.54	4.521	4.445	3.745	3.807	3.318	3.381	3.647	3.314	3.341	3.642	3.332	3.279	3.379	3.248
ANKRD34B	3.574	3.614	2.874	3.6205	3.863	4.628	3.501	3.331	2.804	2.988	3.88	3.679	3.3945	4.116	3.029	3.092	3.5985	3.7335	3.3765	2.8155	3.7305	3.9685	5.4865	3.6635	5.87	2.734	4.3825	3.6815	2.783	4.4865	3.833	4.829	4.007	4.7825	3.387	3.7525	3.908	4.32	4.191	3.922	6.024	3.551	5.7715	4.11	4.334	3.384	4.598	4.4035	4.192
ANKRD34C	2.30267	2.229	2.272	2.848	2.25567	2.318	2.15667	2.176	2.389	2.179	2.28367	2.15133	2.289	2.39833	2.269	2.20533	2.26833	2.48033	2.319	3.04267	2.99067	2.991	2.89067	3.02333	2.877	2.97533	2.88567	3.019	2.81033	2.956	3.02333	3.14433	3.02967	3.02667	2.99933	2.97933	3.17133	3.11367	2.53833	2.52767	2.52267	2.346	2.50267	2.46667	2.526	2.475	2.719	2.58933	2.51367
ANKRD35	2.9355	3.465	3.401	3.0565	2.968	3.0815	2.8175	3.3525	3.4065	3.1475	2.948	2.967	3.237	2.948	2.9115	3.066	3.0885	3.0385	3.086	3.564	3.5805	3.2025	3.4065	3.659	3.3355	3.278	3.369	3.381	3.2595	3.28	3.1845	3.32	3.362	3.348	3.433	3.239	3.457	3.4355	2.695	2.7535	2.805	2.5735	2.641	2.7945	2.6685	2.8585	2.978	2.8885	2.442
ANKRD36	5.62833	5.489	5.027	5.78533	5.36067	4.866	5.562	5.45433	5.09467	5.398	5.46233	5.58433	5.271	5.12533	5.777	5.564	5.254	5.96333	4.74733	5.20467	5.384	5.31567	4.75	5.05	5.182	5.393	5.34967	5.111	5.55233	5.178	5.27867	5.122	5.85267	5.681	5.048	5.50067	4.91967	4.76633	4.59833	5.02667	5.005	5.488	4.87033	5.147	5.23733	4.99933	5.11	5.092	5.112
ANKRD36 /// ANKRD36B	4.9505	5.553	5.0915	5.306	5.435	4.754	5.29	5.4585	5.539	6.337	5.1965	5.6025	5.322	4.9435	6.112	5.426	6.0225	4.8575	5.185	6.528	6.5105	6.1085	4.8095	6.806	5.351	7.0285	6.452	6.984	5.5135	5.8055	5.9105	6.842	6.699	6.354	5.637	6.1625	5.8215	5.6565	6.2715	5.197	6.2185	5.548	5.655	5.6565	6.0515	4.47	6.2645	7.0545	6.109
ANKRD36 /// ANKRD36B /// FLJ40330 /// LOC400986 /// LOC400987	3.632	2.822	2.933	4.438	2.623	3.788	2.906	2.602	3.138	2.611	3.5	3.022	2.782	3.117	2.696	2.834	2.654	2.603	3.322	2.912	2.966	3.448	2.947	3.031	3.083	3.431	3.564	3.035	3.153	3.246	3.489	3.111	3.483	3.447	3.357	3.294	3.563	3.359	2.769	3.496	2.645	2.997	2.489	2.718	3.509	2.827	2.863	3.176	2.68
ANKRD36 /// ANKRD36B /// LOC100134365 /// LOC400986 /// LOC400987	4.505	4.173	4.09	4.829	4.551	4.018	4.54	4.138	4.25	4.324	4.293	4.274	4.342	4.341	4.601	4.583	4.647	4.696	3.937	3.594	3.606	3.834	3.231	3.509	3.988	4.032	3.962	3.914	3.913	3.822	3.816	3.611	4.391	3.868	3.561	3.964	3.454	3.593	2.629	3.506	3.428	3.64	2.887	3.227	3.717	3.39	3.524	3.029	3.311
ANKRD36 /// ANKRD36B /// LOC400986	7.62	7.576	7.158	8.063	7.924	8.158	8.239	7.231	7.612	7.485	7.865	7.886	7.49	7.856	8	8.009	7.865	7.758	7.452	7.758	8.08	8.182	7.162	7.58	7.331	8.029	7.961	8.029	7.678	7.776	7.493	7.624	9.134	8.328	7.875	8.076	7.885	7.659	8.091	7.769	8.269	8.116	7.303	7.765	7.718	7.241	7.675	8.442	8.274
ANKRD36 /// LOC400986	8.148	7.137	7.014	8.84	7.474	7.702	7.875	7.464	7.641	7.598	7.453	7.713	7.49	7.584	7.991	7.667	7.314	7.735	7.234	7.423	7.394	7.347	6.798	7.334	6.744	7.33	6.869	7.692	6.599	7.389	6.935	7.304	8.209	7.708	7.212	7.687	7.863	7.881	5.201	6.806	7.153	7.987	6.844	7.18	7.379	7.385	7.285	6.901	6.987
ANKRD36B	5.51	5.509	5.705	6.387	5.6	6.645	5.417	5.607	5.733	5.706	5.887	5.498	6.176	5.475	5.87	5.293	5.566	5.398	5.069	6.087	5.861	5.832	6.049	5.828	5.77	5.834	5.96	6.306	5.959	6.102	6.049	6.127	6.609	6.277	6.016	5.977	5.948	6.568	4.797	5.378	5.355	5.154	5.047	5.35	5.141	5.526	5.295	5.286	5.132
ANKRD36B /// FLJ40330	4.881	3.996	4.476	4.691	4.109	5.34	3.884	3.378	4.596	4.52	5.785	4.448	4.481	4.45	3.679	4.127	4.76	4.314	4.161	4.267	4.761	4.829	4.595	6.262	4.182	5.145	4.628	5.267	4.468	4.538	4.306	4.645	5.498	4.438	5.526	5.019	5.239	5.479	3.557	5.963	4.134	4.636	3.732	4.227	5.152	4.169	3.758	5.58	4.519
ANKRD37	5.172	4.711	5.4105	4.893	5.091	4.6865	5.175	5.331	4.991	5.185	5.274	5.3705	4.879	5.047	5.166	5.2295	5.701	5.2985	5.222	6.0025	6.3515	5.9065	6.0355	6.536	5.3615	5.9075	6.1345	6.369	5.877	5.666	5.876	6.383	6.3385	6.1655	6.1185	5.9645	5.767	5.8205	6.3815	5.181	5.7905	5.6885	5.538	5.415	6.212	5.2925	5.704	6.0615	5.9715
ANKRD39	4.445	3.436	3.7	3.941	3.761	4.055	4.117	3.907	3.65	4.012	3.57	3.919	4.188	3.608	4.218	3.852	3.875	3.719	3.93	4.285	4.455	4.51	4.045	4.256	4.495	4.401	4.303	4.492	4.675	4.241	4.263	4.456	4.526	4.145	4.31	4.455	4.195	4.221	3.256	3.547	3.178	3.373	3.176	3.652	3.405	3.63	3.51	3.374	3.444
ANKRD40	7.731	7.7185	7.815	7.2745	7.717	6.7285	7.3985	7.84	7.5365	7.759	7.2415	7.8865	7.7675	7.4735	7.897	7.2725	8.014	7.3115	7.7105	7.8375	7.921	7.7685	8.0895	8.055	7.269	7.938	7.657	7.751	7.777	7.5095	7.976	7.371	7.8615	7.7945	8.051	7.6665	7.8125	7.437	7.4965	7.4205	7.2815	7.7035	7.096	7.4325	7.1745	7.7875	7.3785	7.69	7.291
ANKRD42	5.23	5.1075	5.6135	4.741	5.2485	4.6855	5.7895	5.7455	4.9035	5.639	5.6375	5.569	5.4475	5.2705	5.013	5.3295	5.3045	5.6655	5.643	6.808	6.572	6.6625	6.1895	6.8105	5.7505	6.2185	6.29	6.534	6.5235	5.808	6.683	7.061	6.395	6.9415	6.7595	6.503	6.6055	6.121	5.6655	5.3285	5.869	5.6235	5.739	6.2095	5.7125	5.3	6.373	6.581	5.546
ANKRD43	2.4785	2.4495	2.389	2.4415	2.4605	2.4855	2.3645	2.3175	2.572	2.4725	2.553	2.396	2.5255	2.372	2.502	2.5955	2.4175	2.4915	2.4385	3.189	3.0775	3	3.014	2.9725	3.0055	3.0105	2.9935	3.072	2.8905	3.0465	2.875	3.0575	3.008	2.959	2.858	3.005	2.9615	2.9555	2.353	2.5145	2.533	2.212	2.533	2.3335	2.6925	2.4795	2.4185	2.602	2.547
ANKRD44	6.8135	6.9075	6.12475	6.6815	6.87875	6.9725	6.82925	6.3855	6.5685	6.5105	6.8205	6.73675	6.80725	6.6585	6.967	6.976	6.32475	6.5085	6.53675	6.46125	6.63825	6.8835	6.6925	6.40975	7.178	7.033	7.00175	6.8715	7.07225	6.94025	6.939	6.47525	7.1495	6.8355	6.88525	7.01525	7.1645	6.877	5.1525	6.45475	6.4475	6.74925	6.166	6.694	5.704	6.8305	6.12175	6.117	6.2265
ANKRD45	2.811	2.4615	2.6195	2.933	2.496	2.841	2.5075	2.521	2.6255	2.4715	2.588	2.491	2.584	2.564	2.498	2.5745	2.5165	2.579	2.519	3.231	2.8965	2.99	3.032	3.1495	2.98	3.0415	2.9905	3.068	3.0855	2.968	3.2065	3.004	3.2115	3.104	3.32	3.019	3.4255	3.317	2.554	2.274	2.561	2.5075	2.485	2.4395	2.649	2.482	2.511	2.5245	2.4285
ANKRD46	5.1135	4.8085	5.47	4.985	5.171	5.2645	5.7135	5.6355	5.1085	5.104	5.2255	5.702	4.9875	5.539	5.0115	4.8795	5.514	5.364	5.613	6.156	6.262	6.1735	6.178	6.702	5.7225	5.786	6.0925	6.3545	5.973	5.9395	6.134	6.768	6.202	6.4405	6.4955	6.152	6.115	6.218	6.2145	5.4625	5.7895	5.659	5.9185	5.6315	5.9755	5.093	5.8735	6.3235	6.2675
ANKRD49	7.553	7.172	7.459	7.035	7.835	8.304	7.973	7.84	7.004	6.782	7.497	7.933	7.004	7.975	7.35	7.74	7.797	7.805	7.517	8.802	9.262	9.317	8.52	8.783	8.81	8.653	8.711	8.976	8.55	8.582	8.446	9.586	8.816	9.236	8.697	8.829	8.551	9.007	9.784	8.578	9.315	8.582	9.337	8.624	9.541	7.957	9.214	10.074	9.643
ANKRD5	3.8055	3.983	3.985	3.7315	3.798	3.425	4.318	4.1755	4.032	3.797	3.9685	4.2765	3.414	4.426	4.1995	4.039	4.0395	3.5155	4.281	4.2305	4.3395	3.857	4.403	4.6335	3.8155	3.881	4.0215	4.583	4.3875	3.8235	4.2405	4.4775	4.596	4.324	4.2705	4.4305	4.1055	4.4515	4.1505	3.729	3.7795	4.007	3.533	4.0855	3.6155	3.6535	3.4645	4.311	3.744
ANKRD50	4.9905	5.4675	5.5285	4.9025	5.6785	4.476	5.1165	5.6145	5.096	5.3605	5.232	5.265	5.2155	5.5305	5.3415	5.345	5.4505	5.8485	5.212	6.1675	5.9655	6.285	5.9095	5.6365	6.136	5.944	5.7385	5.871	5.462	5.9475	5.8495	6.2865	5.2675	6.0135	6.0905	5.8065	5.3065	5.8875	5.178	5.4775	5.8095	5.33	5.9835	5.6485	5.1265	5.323	5.465	5.5395	5.561
ANKRD52	5.752	5.394	5.698	5.718	5.618	5.629	5.294	5.632	5.995	5.755	5.234	5.423	5.522	5.595	5.576	5.229	5.382	5.197	5.447	5.319	5.489	5.6	6.02	5.96	5.486	5.913	5.666	5.832	5.998	5.603	6.034	5.392	5.572	5.566	5.871	5.788	5.738	5.633	4.528	5.138	4.856	4.931	4.964	5.361	4.476	5.681	4.754	4.887	4.75
ANKRD53	2.463	2.539	2.934	2.715	2.476	2.175	2.36	2.301	2.641	2.494	2.568	2.365	2.701	2.458	2.464	2.236	2.47	2.532	2.274	3.323	3.095	2.86	3.175	3.213	3.048	3.104	3.006	3.081	3.415	3.043	3.18	3.152	3.001	3.032	3.479	3.312	3.259	3.102	2.343	2.453	2.423	2.113	2.158	2.643	2.489	2.507	2.613	2.426	2.177
ANKRD54	5.362	5.199	5.387	5.391	5.225	5.152	5.144	5.211	5.613	5.162	5.339	5.176	4.959	5.343	5.427	4.965	5.297	5.184	5.637	5.424	6.126	5.119	5.533	5.61	5.349	5.918	5.387	5.147	5.806	5.332	5.581	5.603	5.444	5.602	5.64	5.583	5.332	5.943	4.57	4.227	4.319	4.169	4.39	4.371	4.594	4.986	4.25	4.456	4.371
ANKRD55	5.896	5.93	7.175	7.413	6.409	6.998	6.642	7.074	6.743	6.663	6.837	6.832	6.724	6.509	6.703	7.69	6.498	6.742	6.658	7.036	5.979	5.742	6.974	6.314	7.266	7.251	7.208	6.025	7.587	7.333	7.921	6.532	7.03	7.918	7.402	7.018	6.962	7.456	6.932	7.031	6.549	6.491	6.717	5.858	7.559	6.698	7.349	7.232	6.762
ANKRD56	2.401	2.047	2.174	2.122	2.161	2.209	2.195	2.123	2.318	2.353	2.479	1.945	2.412	2.198	2.211	2.127	2.183	2.069	2.156	2.842	2.824	2.897	2.859	3.011	2.915	2.942	2.933	2.844	2.844	2.865	3.002	2.843	2.967	2.86	2.749	2.714	3.016	2.877	2.304	2.432	2.281	2.385	2.469	2.268	2.317	2.484	2.307	2.233	2.497
ANKRD57	3.0415	3.025	3.519	3.069	3.434	3.2455	3.036	3.648	3.0505	3.246	3.1105	3.4945	3.7095	3.455	3.4805	3.4705	3.5845	3.738	3.135	3.4715	3.5985	3.9865	3.758	3.621	3.991	3.7305	3.9055	3.873	3.7745	3.783	3.719	3.8885	3.373	3.8925	3.8915	3.8055	3.8045	3.7395	3.931	3.2075	3.5835	3.378	3.609	3.781	3.9245	3.1785	3.509	3.5255	3.6495
ANKRD58	4.879	5.604	4.776	4.548	5.151	3.651	4.674	4.889	5.758	5.174	5.226	5.288	5.244	5.439	4.711	5.517	4.942	5.225	5.182	5.364	5.631	5.579	5.985	5.364	5.555	5.91	5.702	5.169	5.665	5.776	5.959	5.664	5.19	5.258	5.792	5.632	5.03	5.14	4.348	4.731	3.865	4.435	4.805	4.247	4.789	4.687	4.189	4.513	4.404
ANKRD6	5.4755	6.0135	5.766	5.1935	5.766	5.517	5.9095	5.821	5.682	5.224	5.877	6.156	5.679	6.0225	5.32	5.3055	5.801	5.9335	6.083	6.4195	6.201	6.329	6.21	6.3735	6.1155	6.2545	6.5215	6.505	6.1225	6.668	6.6235	6.6745	6.5085	6.622	6.5405	6.37	6.538	6.4205	5.9745	6.258	6.266	6.101	6.191	5.601	6.3725	5.2835	5.768	6.4525	6.3115
ANKRD7	1.944	2.17	2.069	3.08	2.121	2.231	2.018	2.035	2.286	2.063	2.644	2.258	2.14	2.581	2.072	2.31	2.08	2.178	2.158	2.826	2.797	2.828	2.823	2.831	2.846	2.675	3.092	2.811	2.649	2.905	2.812	3.011	2.749	2.817	2.78	2.813	3.149	2.682	2.604	2.407	2.337	2.252	2.719	2.324	2.252	2.268	2.663	2.756	2.384
ANKRD9	4.4755	4.1515	4.728	4.254	4.5125	5.5745	4.4565	4.067	4.382	5.449	4.6565	4.7255	4.924	4.853	5.074	5.0105	4.4495	4.8195	4.616	6.2605	5.024	6.3845	5.4155	5.027	5.347	5.5995	5.047	5.096	5.181	5.622	5.0255	5.9105	5.3975	5.309	5.133	4.588	4.679	4.677	4.5535	3.982	3.3925	3.8025	3.683	3.61	4.6455	4.1985	3.8885	3.3675	3.2085
ANKS1A	4.3266	4.3012	3.8716	4.1502	4.1706	4.0176	4.1854	4.028	4.188	4.0468	4.1504	4.1822	4.2446	4.095	4.0966	4.3222	3.9142	4.093	4.3368	4.7328	4.7144	4.6722	4.8298	4.5302	4.94	4.8024	4.8038	4.7498	4.8546	4.8046	4.7698	4.6588	4.7614	4.7046	4.7096	4.8668	4.7022	4.8226	3.7716	4.158	3.9252	3.9974	3.749	3.934	3.819	4.216	3.615	3.7364	3.8104
ANKS1B	2.9304	2.9358	2.8013	3.0346	2.9144	2.9543	2.8866	2.9044	2.9383	2.8698	2.844	2.9287	2.8882	2.8817	2.9093	2.9032	2.8087	2.875	2.9686	3.4521	3.3792	3.3929	3.4433	3.3329	3.4842	3.4666	3.4402	3.4804	3.2927	3.4427	3.4502	3.398	3.4294	3.3928	3.4327	3.3613	3.4609	3.556	3.1072	3.0431	3.0516	3.002	3.1039	2.984	3.0617	3.0043	3.0426	3.0536	3.187
ANKS3	3.716	3.45875	3.69275	3.73975	3.5935	3.45825	3.31225	3.36625	3.715	3.97125	3.819	3.39425	3.6455	3.648	3.4135	3.5695	3.40775	3.521	3.5245	3.8695	3.54225	3.784	3.70275	3.5665	3.57425	3.6865	3.66375	3.78375	3.89075	3.73125	3.828	3.684	3.655	3.75475	3.83275	3.67125	3.7715	3.67825	2.5465	3.07325	2.84625	2.7695	2.78225	2.92525	2.9455	2.9025	2.83175	2.74575	2.67325
ANKS4B	2.267	2.123	2.2005	2.3685	2.2525	2.3465	2.385	2.375	2.227	2.2975	2.333	2.25	2.297	2.2565	2.3365	2.3845	2.1715	2.4035	2.259	2.674	2.8685	2.7555	2.725	2.862	2.8385	2.732	2.7565	2.925	2.7895	2.7805	2.916	2.8345	2.994	2.8325	2.8515	2.881	2.948	2.9685	2.254	2.3125	2.248	2.3925	2.425	2.463	2.3405	2.393	2.4405	2.4235	2.52
ANKS6	4.836	4.637	4.95367	4.80467	4.76333	4.874	4.49067	4.84333	5.16067	4.791	4.733	4.88333	4.647	5.017	4.80333	4.71933	4.88533	4.57867	4.903	4.87	4.97233	5.08533	5.14767	5.29833	5.04467	5.31533	5.096	5.33567	5.42767	5.143	5.15867	5.141	5.35633	5.09433	5.64267	5.253	5.191	4.91567	4.127	4.65	4.526	4.413	4.24133	4.569	4.52667	4.542	4.48233	4.563	4.419
ANKZF1	6.3495	6.2745	6.0115	6.1145	6.3305	5.628	5.995	5.902	6.4775	5.84	5.961	6.1085	6.2905	5.8825	6.399	6.379	6.239	6.2355	5.9695	5.608	5.94	5.8815	5.689	5.8175	5.882	6.0575	5.871	5.826	6.1015	5.775	6.0895	5.6265	6.0475	6.017	5.7415	5.973	5.846	5.505	5.483	5.294	5.4295	5.7655	5.256	5.429	5.3235	5.9145	5.7135	5.264	5.4285
ANLN	2.9155	3.23075	3.12775	3.4775	3.02	3.45925	2.8025	2.97725	3.30475	2.92825	3.3155	2.86475	2.99825	2.90775	3.0405	3.0735	3.03325	3.20275	3.132	3.8095	3.3575	3.75975	3.8185	3.995	3.299	3.69025	3.461	3.77825	3.4675	3.38625	3.727	3.606	3.61025	3.5005	3.47625	3.35325	3.69975	3.836	3.3295	2.8	3.43075	3.156	3.37075	2.9485	3.58775	2.99475	3.4265	3.26775	3.37175
ANO1	2.253	2.09833	2.12033	2.20167	2.21133	2.10267	2.133	2.20567	2.65067	2.15633	2.175	2.182	2.259	2.115	2.108	2.08933	2.10667	2.104	2.15167	2.925	2.78367	2.74867	2.74133	2.827	2.87	2.79	2.73967	2.90933	2.78667	2.80067	2.83533	2.829	2.81967	2.77133	2.75367	2.802	2.95967	2.83933	2.46867	2.159	2.26533	2.22533	2.20067	2.33	2.21	2.15	2.26967	2.09433	2.24933
ANO10	4.426	4.468	4.512	4.174	4.515	4.448	4.169	4.277	4.63	4.308	4.207	4.087	4.626	4.342	4.341	4.118	4.353	4.533	4.697	4.334	4.284	4.264	4.547	4.165	4.38	4.461	4.287	3.864	4.555	4.74	4.643	4.169	4.338	4.268	4.248	4.378	4.144	4.554	3.257	3.796	3.618	3.377	3.639	3.803	3.481	4.094	3.508	3.088	3.371
ANO2	2.003	2.08	2.176	1.931	1.946	1.805	1.977	2.099	1.87	2.313	1.744	1.939	1.948	1.809	1.931	1.727	1.94	2.179	1.874	2.32	2.519	2.398	2.405	2.453	2.688	2.28	2.438	2.249	2.43	2.377	2.34	2.343	2.449	2.432	2.477	2.457	2.517	2.546	2.504	2.132	2.051	2.068	2.099	1.911	2.239	2.572	2.126	2.113	1.893
ANO3	2.4815	2.5065	2.41675	2.374	2.42175	2.5715	2.466	2.53275	2.526	2.38025	2.47275	2.5135	2.43775	2.661	2.301	2.58925	2.36275	2.55525	2.52375	3.0675	3.0155	2.895	2.9635	2.90975	2.90475	2.9815	2.97325	2.98875	2.9315	2.96575	2.92775	3.049	2.9695	2.99525	2.924	2.9955	2.9545	3.0475	2.6465	2.576	2.4935	2.42475	2.5975	2.43625	2.45225	2.5135	2.448	2.464	2.51375
ANO4	2.49967	2.60433	2.608	2.662	2.51933	2.6	2.57367	2.51233	2.40767	2.591	2.538	2.425	2.74233	2.59433	2.58733	2.55233	2.52367	2.50367	2.56733	3.07433	3.04233	3.03933	3.003	3.01133	2.98933	3.087	2.95367	3.09033	3.00033	3.044	3.115	3.061	2.97033	3.069	2.999	2.966	3.126	3.07967	2.586	2.60133	2.403	2.41267	2.38267	2.58867	2.46533	2.41433	2.51233	2.44233	2.60467
ANO5	2.8365	2.827	2.9765	3.511	2.6665	2.4735	2.75	2.951	2.8645	2.7535	2.9765	2.954	2.6645	3.156	2.149	2.855	3.457	3.266	2.892	3.125	3.4655	3.6405	3.471	3.4045	3.394	3.843	3.4205	3.2255	3.6895	3.502	3.022	3.9635	2.9565	3.61	3.449	3.34	3.3845	3.412	3.3815	3.3115	3.722	3.024	3.2645	3.476	2.9785	2.8485	4.141	3.1325	2.986
ANO6	5.71933	5.70917	5.8195	6.43417	5.67433	5.91067	5.6525	5.78917	5.70433	5.87483	5.56533	5.6655	5.604	6.10383	5.73433	5.8235	5.828	6.27983	5.63583	6.43367	6.20717	6.4655	6.42167	6.42833	6.26733	6.34033	6.26417	6.4175	6.18633	6.56267	6.1945	6.46633	6.285	6.52083	6.539	5.98383	6.13383	6.60767	5.76867	5.7915	5.5525	5.50333	5.52233	5.60133	6.01833	5.76	5.598	5.6075	5.77833
ANO7	3.248	2.86733	2.945	2.96367	2.964	3.274	2.816	2.90967	3.02667	3.131	2.841	2.669	2.83433	2.90667	2.71167	2.88033	2.849	2.81133	2.89067	3.903	3.66767	3.67333	3.65567	3.63133	3.63967	3.60333	3.789	3.746	3.852	3.821	3.61933	3.66733	3.752	3.54533	3.80367	3.62567	3.68433	3.62267	2.55133	2.789	2.91333	2.68	2.65567	2.677	2.81467	2.90133	2.896	2.645	2.62967
ANO8	4.068	3.036	3.615	3.915	3.413	4.224	3.208	3.327	3.418	3.004	3.545	3.206	3.338	3.197	3.736	3.472	3.31	3.135	3.152	4.069	4.113	3.609	3.96	4.204	3.653	4.185	3.859	4.054	3.826	4.185	3.899	3.833	3.743	3.637	3.553	4.049	3.854	3.735	3.084	3.05	2.834	2.821	3.073	3.198	3.635	3.132	2.795	2.785	3.081
ANO9	4.1195	3.856	4.474	4.236	3.815	4.5355	3.9795	4.128	4.546	4.0125	4.1915	4.041	4.1205	4.05	4.332	3.937	4.133	3.8015	4.128	4.8475	4.5795	4.8055	4.6415	4.8425	4.588	5.0085	4.7025	4.6605	4.939	4.9055	5.0135	4.8765	5.147	4.825	5.2115	4.8915	4.6785	4.6465	3.323	3.5215	3.4195	3.4565	3.295	3.7165	3.6995	3.8385	3.797	3.4655	3.6165
ANP32A	8.5265	8.74275	8.486	8.2815	8.68875	8.01625	8.368	8.40375	8.27475	8.14575	8.728	8.56075	8.55925	8.52475	8.6795	8.694	8.14275	8.51075	8.64	8.39325	8.06725	8.14225	8.6385	8.246	8.895	8.446	8.46	8.439	8.5225	8.6855	8.712	8.145	7.94275	8.2915	8.5405	8.5275	8.65725	8.39275	6.56	7.9025	7.8955	8.19225	7.468	8.171	6.655	8.09425	6.889	7.28	7.64025
ANP32B	10.029	10.142	10.2995	10.1235	10.132	10.2385	10.095	10.454	10.0665	10.8145	10.286	10.4395	10.306	10.152	10.675	10.5865	10.649	10.2565	10.2295	10.769	10.675	11.099	10.5585	10.786	10.502	10.7235	10.6945	10.878	10.7635	10.5335	10.659	10.6365	10.6635	10.8505	10.8175	10.7225	10.28	10.311	10.5315	10.2365	9.9615	10.4575	10.0335	10.3285	10.099	10.315	10.018	10.3025	10.154
ANP32C	1.945	2.064	1.973	2.116	1.893	2.16	1.969	1.899	2.034	2.306	2.15	1.963	2.131	1.867	1.894	2.182	1.841	2.092	2.073	2.721	2.609	2.636	2.695	2.585	2.824	2.724	2.758	2.835	2.741	2.82	2.692	2.801	2.652	2.479	2.637	2.463	2.709	2.606	2.295	2.234	2.256	2.245	2.493	2.423	2.238	2.379	2.295	2.181	2.42
ANP32D	2.2405	1.809	2.111	2.394	1.883	1.8555	1.8625	1.941	1.903	2.2255	2.0675	1.951	1.9665	1.716	1.893	2.2115	2.0455	1.895	1.8605	2.6095	2.524	2.583	2.5675	2.5675	2.5715	2.552	2.6275	2.6715	2.655	2.601	2.505	2.761	2.481	2.607	2.5715	2.472	2.7845	2.714	2.265	2.0675	2.224	2.186	2.117	2.1775	2.3585	2.0305	2.182	2.246	2.079
ANP32E	4.9258	5.425	5.2086	5.3728	5.443	5.4594	5.6952	5.496	5.2136	6.0106	5.4294	5.6938	5.5216	5.2628	5.6784	5.6174	5.464	5.5086	4.9874	5.7754	5.801	5.6566	5.6346	6.0776	5.6224	5.3822	5.6456	6.1512	5.3194	5.8702	5.5952	6.0834	6.0098	5.8488	5.4616	5.9022	5.1762	5.0006	6.557	5.196	5.3306	5.7004	5.6268	5.4888	5.6598	5.1142	4.9952	6.0292	5.633
ANPEP	7.6335	7.8245	6.9165	7.1275	7.729	7.646	7.1295	6.6015	8.0595	7.2015	7.6565	6.9915	7.5385	7.4745	6.829	7.433	6.781	7.1795	7.616	7.627	7.147	6.48	7.645	6.956	8.7285	7.158	7.073	7.3005	7.9815	8.0395	7.5505	7.1875	6.0675	7.4275	7.221	7.738	8.1565	7.3605	5.783	7.5775	6.658	6.602	6.8305	6.6955	6.3815	7.311	5.9755	6.111	6.5525
ANTXR1	2.37375	2.51075	2.282	2.8085	2.2625	2.63925	2.58925	2.247	2.33425	2.49	2.3075	2.31225	2.247	2.368	2.302	2.2425	2.2235	2.36625	2.45725	2.71075	2.83925	2.83025	2.87975	2.86975	2.8885	2.75625	2.84475	2.88275	2.85675	2.869	2.847	2.79775	2.74025	2.88825	2.8685	2.77875	3.0005	4.00475	2.263	2.3445	2.39075	2.38	2.33875	2.363	2.36175	2.22325	2.42475	2.44475	2.312
ANTXR2	7.15575	7.1795	6.468	6.61425	6.8405	6.062	6.70275	6.58325	6.62275	6.28225	6.77425	6.75825	6.38625	7.0805	6.6745	7.1755	6.27275	7.1155	6.66075	7.09825	7.104	7.088	7.19125	6.74275	7.7085	7.11175	7.28975	7.03425	6.8655	7.36475	7.159	7.168	6.59025	6.899	7.038	7.28125	7.33	7.21875	6.507	6.8285	6.27325	6.45875	6.24275	6.953	6.0745	6.642	6.599	6.28325	6.54425
ANUBL1	5.6905	6.0675	6.306	5.9575	6.082	5.7405	6.243	6.2635	5.643	6.0235	6.049	6.5365	5.9395	6.1325	5.816	5.9075	6.3185	6.021	6.159	6.7445	6.6275	6.9425	6.738	6.9535	6.0305	6.7475	6.505	7.265	6.248	6.254	6.538	7.091	7.079	6.7685	6.5475	6.7045	6.3265	6.419	6.7945	5.7225	6.4345	6.456	6.307	6.228	6.439	5.847	6.4935	6.7295	6.581
ANXA1	8.162	7.6308	8.3656	7.962	8.1332	7.9248	8.056	8.5042	7.817	8.0958	8.1232	7.9126	8.142	8.1756	8.1562	7.6776	8.8796	7.9918	7.9142	9.0262	9.2044	9.3284	8.4462	9.0514	8.6002	8.7636	8.4588	8.6002	8.4056	8.7712	8.7798	9.352	8.5884	8.8416	8.899	8.457	8.3858	9.0694	9.2194	8.6074	9.325	8.179	9.0054	8.7884	9.1238	8.284	9.0034	9.018	8.9854
ANXA10	2.268	2.039	2.037	2.273	2.104	2.027	1.957	2.087	2.257	2.13	2.031	2.217	2.313	2.137	2.052	2.063	2.122	2.421	2.074	3.169	2.997	2.943	3.155	3.029	3.081	2.992	3.175	3.047	3.086	2.971	2.933	3.146	3.104	3.067	3.176	3.021	3.083	2.993	2.735	2.438	2.739	2.308	2.234	2.445	2.303	2.333	2.214	2.384	2.354
ANXA11	9.298	9.42788	9.26013	9.3875	9.2495	9.14288	9.03513	8.92938	9.61425	8.994	9.36063	9.1925	9.41887	9.17838	9.30875	9.30475	8.94363	8.90212	9.26838	9.75275	9.65912	9.24962	9.799	9.43675	9.98837	9.52337	9.73775	9.469	9.76262	9.88875	9.98462	9.2805	9.312	9.41375	9.75425	9.60975	9.96738	9.79787	8.28163	8.94775	8.62425	8.71888	8.52437	8.77737	8.31738	9.1785	8.4835	7.89275	8.259
ANXA13	2.197	2.0825	1.968	2.1795	2.108	2.093	2.1065	2.1045	2.1	2.085	2.0235	1.968	2.0955	1.9625	1.9655	2.047	2.119	2.176	2.114	2.7605	2.8105	2.5985	2.712	2.6955	2.6855	2.8175	2.6145	2.764	2.6885	2.7375	2.7435	2.7145	2.788	2.6705	2.7345	2.7675	2.707	2.7915	2.3645	2.3035	2.255	2.218	2.3125	2.2185	2.227	2.392	2.266	2.421	2.334
ANXA2	8.94417	9.21617	9.1755	9.03467	9.02217	8.1505	8.77783	9.00383	8.598	9.09383	8.7745	8.84233	9.1495	8.61983	9.18817	8.68083	9.2615	8.83633	8.94767	9.471	9.1855	9.40883	9.25067	9.28767	9.0775	9.1805	8.92483	8.87933	9.24917	9.34217	9.37467	8.779	9.342	8.9485	9.47683	8.85333	8.80917	8.83717	7.75767	8.505	8.07467	8.45317	7.8285	8.66567	7.20167	8.8255	7.71867	7.5245	7.69017
ANXA2P1	2.619	2.483	2.657	2.743	2.677	2.73	2.661	2.833	2.744	2.794	2.561	2.749	2.673	2.629	2.749	2.863	2.785	2.704	2.757	3.299	2.926	2.979	3.1	3.075	3.097	3.007	3.082	2.943	3.225	2.975	3.06	2.883	3.125	2.996	3.324	3.192	3.249	2.874	2.309	2.698	2.483	2.436	2.31	2.389	2.677	2.304	2.338	2.585	2.348
ANXA2P2	10.93	10.781	11.058	10.992	10.835	10.023	10.491	10.858	10.524	10.971	10.561	10.682	10.956	10.38	10.857	10.29	10.998	10.546	10.744	10.564	10.239	10.498	10.423	10.549	10.418	10.388	10.096	10.256	10.468	10.549	10.471	9.958	10.184	10.249	10.723	10.109	10.419	10.55	9.337	10.444	10.047	10.365	9.525	10.492	8.797	10.618	9.756	9.291	9.231
ANXA2P3	2.68	2.857	3.021	3.297	2.801	2.836	2.712	2.948	2.859	2.856	2.848	2.883	2.839	2.887	2.953	2.747	2.803	3.06	3.017	3.173	3.134	3.236	3.277	3.2	3.175	3.14	3.18	3.284	3.159	3.251	3.216	3.067	3.266	2.915	3.359	3.161	3.166	3.105	2.418	2.589	2.495	2.435	2.356	2.503	2.506	2.723	2.468	2.646	2.519
ANXA3	8.0235	7.633	8.1195	7.1395	7.139	8.7325	7.8775	7.765	7.7875	7.3335	8.1	6.447	7.272	8.167	6.5885	8.019	6.7325	8.1955	7.576	8.5085	8.86	8.3375	9.14	7.5665	8.9845	7.2415	8.909	8.296	7.722	8.9955	8.3335	9.7375	6.6995	8.3745	8.0425	7.726	8.541	9.28	8.7385	8.023	9.8265	7.0835	9.108	8.6495	8.402	7.733	9.8195	9.511	9.253
ANXA4	6.86289	6.88656	6.83878	6.58989	6.80967	6.449	6.67822	6.70544	6.25533	7.03244	6.63733	6.74611	6.73967	6.62456	6.73533	6.42756	6.762	6.69433	6.94978	7.66233	7.07356	7.58556	7.19256	7.44056	7.07167	7.30867	7.244	7.18467	7.248	7.277	7.39567	7.16278	7.58456	7.13433	7.46967	6.77833	6.944	7.18022	6.62367	6.56489	6.75978	6.49589	6.42089	6.99733	6.43744	6.82122	6.53256	6.36389	6.37767
ANXA5	8.623	8.39083	8.39417	8.51533	8.41733	7.7445	8.225	8.36567	8.20117	8.4785	7.887	8.09883	8.29967	7.75433	8.325	8.217	8.52133	8.261	8.25033	8.34733	8.15533	8.60033	8.479	8.345	8.549	8.47517	8.41433	7.95867	8.43133	8.298	8.4165	7.634	8.26533	8.095	8.43233	8.0575	8.50767	8.2235	7.40317	7.92533	7.75133	7.78867	7.24133	7.87583	6.55617	8.38667	7.04783	6.65583	7.49383
ANXA6	9.211	8.717	9.145	9.701	9.057	8.405	9.023	9.398	9.487	9.201	8.87	9.242	9.421	8.524	9.371	8.74	9.384	8.792	9.206	9.303	9.424	9.031	9.33	9.683	9.078	9.262	9.427	9.549	9.983	9.384	9.383	9.25	10.08	9.147	9.686	9.302	9.423	9.412	8.634	8.834	8.571	9.186	7.826	8.958	8.036	9.383	8.578	8.035	8.069
ANXA7	9.286	9.375	9.5915	9.4165	9.4825	9.3285	9.2945	9.387	9.3855	9.422	9.4805	9.504	9.2835	9.295	9.396	9.372	9.4765	9.372	9.5125	9.4655	9.386	9.457	9.4785	9.537	9.575	9.6175	9.4125	9.456	9.536	9.516	9.561	9.538	9.689	9.4485	9.6255	9.515	9.5475	9.5505	9.03	9.4125	9.0105	9.2915	9.099	9.4215	8.8775	9.4265	9.112	9.032	9.05
ANXA8 /// ANXA8L1 /// ANXA8L2	2.53675	2.392	2.47725	2.59	2.544	2.59125	2.3505	2.438	2.5015	2.3795	2.63325	2.39125	2.6135	2.3825	2.62	2.3955	2.561	2.379	2.508	3.118	2.97	3.446	3.15325	3.047	3.16275	3.0075	3.0585	3.199	3.081	3.02975	3.067	3.0435	2.92425	2.971	3.196	2.9475	2.993	3.08325	2.3895	2.609	2.4195	2.3385	2.50625	2.4315	2.41125	2.28625	2.57575	2.47175	2.357
ANXA8L1	2.6895	2.5555	2.275	2.2995	2.5715	2.3555	2.324	2.3885	2.3515	2.4895	2.406	2.3845	2.4425	2.39	2.494	2.4625	2.209	2.4455	2.4705	2.965	2.879	2.842	2.859	2.844	2.6725	2.8185	2.807	3.0465	2.8145	2.9365	2.82	3.015	2.8195	2.804	2.812	2.858	3.0325	2.955	2.535	2.486	2.418	2.5085	2.671	2.4975	2.5995	2.5895	2.423	2.4245	2.7085
ANXA9	3.649	3.347	3.391	3.221	3.542	2.855	3.499	3.471	3.14	3.279	3.649	3.509	3.239	3.335	3.154	3.279	3.2	3.327	3.58	3.36	3.633	3.564	3.828	3.535	3.753	3.527	3.864	3.02	3.378	3.424	3.798	3.242	2.99	3.457	3.516	3.841	3.605	3.639	1.996	3.104	2.537	2.992	2.533	2.929	2.166	3.041	3.002	2.415	2.406
AOAH	10.219	10.761	10.503	10.128	10.539	9.887	10.238	10.283	10.833	10.656	10.25	9.768	10.55	10.132	9.763	10.117	10.079	9.728	10.433	10.35	10.682	10.401	10.814	10.735	10.65	10.65	10.701	10.483	10.961	10.733	10.645	10.264	10.263	10.645	10.398	10.586	10.667	10.614	9.463	10.366	10.676	10.245	9.9	10.125	9.874	10.806	10.207	9.902	9.787
AOC2	5.574	6.118	4.504	4.415	5.697	5.257	5.419	4.161	6.002	4.408	5.932	5.342	5.126	5.65	5.146	5.66	4.543	5.459	5.538	5.082	5.935	4.671	5.023	4.75	5.949	5.222	5.105	4.816	5.744	5.414	6.047	5.161	4.505	5.243	4.984	5.743	5.898	5.957	6.415	5.828	4.924	4.67	5.513	4.609	5.054	4.767	4.666	5.213	5.375
AOC3	3.8385	4.1995	3.397	3.464	4.23	3.6915	3.7255	3.3675	4.3695	3.2815	3.864	4.147	3.964	4.214	3.8905	3.91	3.295	4.034	3.7985	4.052	4.759	4.1585	4.3775	4.266	4.9705	4.4385	4.443	4.337	4.88	4.682	4.782	4.351	3.914	4.4215	3.925	4.6795	4.6185	4.9615	4.102	4.4255	3.9695	3.9535	4.3175	3.7735	4.2095	3.8295	3.7955	4.065	4.2725
AOX1	2.682	2.735	2.753	2.398	2.511	2.841	2.5	2.814	2.89	2.771	2.756	2.634	2.748	2.315	2.602	2.723	2.81	2.572	2.645	3.317	3.116	3.006	3.145	3.14	3.146	3.14	3.135	3.351	3.006	3.108	3.114	3.191	3.09	3.119	3.203	3.345	3.145	3.107	2.59	2.716	2.446	2.549	2.386	2.576	2.591	2.481	2.577	2.482	2.479
AP1AR	6.4755	6.1425	6.833	5.9505	6.798	6.5475	6.8465	7.5815	5.9575	6.156	6.4895	7.152	5.7	7.2485	5.8425	6.3865	7.1875	6.951	6.6045	7.577	7.6145	7.987	7.4005	8.0815	7.139	7.4365	7.303	7.8835	6.968	6.978	7.2355	8.3045	7.4015	7.8235	7.3735	7.425	6.998	8.2465	8.6235	6.954	7.9545	7.566	7.934	7.398	8.2075	6.484	7.909	8.6845	8.41
AP1B1	5.389	5.627	5.7255	5.683	5.5525	5.7515	5.433	5.469	5.8535	5.823	5.4715	5.581	5.755	5.3895	5.4645	5.3305	5.6775	5.2105	5.2175	5.85	5.674	5.878	5.8185	5.954	5.76	5.782	6.0145	5.5665	6.044	5.9685	6.0035	5.5125	5.649	5.8375	6.177	5.8805	5.6985	5.4965	4.5135	4.7035	4.487	4.591	4.618	4.7865	4.756	5.1655	4.4685	4.2085	4.2045
AP1G1	6.136	6.02183	5.61783	5.833	6.03817	5.79717	5.91167	5.623	5.9635	5.73333	5.71117	5.85433	5.69017	5.944	6.00667	5.83683	5.58233	5.8115	5.90383	6.24067	6.27233	6.1775	6.436	6.13917	6.31783	6.251	6.41167	6.3595	6.3995	6.46233	6.366	6.163	6.29817	6.21983	6.03817	6.32783	6.39933	6.04067	5.67083	5.82233	5.66517	5.92733	5.559	5.7475	5.498	5.8875	5.47983	5.7065	5.76067
AP1G2	9.403	9.045	9.662	9.72	9.274	9.647	9.168	9.67	9.736	9.352	9.138	9.312	9.652	9.171	9.551	8.976	9.731	9.153	9.41	10.288	10.262	10.158	10.155	10.379	10.144	10.457	10.303	10.068	10.489	10.198	10.376	10.036	10.457	10.254	10.708	10.265	10.118	10.034	9.532	9.618	9.533	9.684	9.489	9.54	9.694	9.834	9.63	9.289	9.43
AP1M1	6.35	6.569	5.877	6.3145	6.1385	5.9455	6.1955	6.0325	6.289	6.242	6.1665	6.0645	6.6085	6.1815	6.4315	6.333	5.891	6.05	5.89	5.885	6.2715	5.885	6.3245	5.6605	6.4605	6.369	6.132	6.097	6.6485	6.273	5.934	5.5035	6.083	6.0595	6.607	6.504	5.5865	5.8655	4.919	5.701	4.8535	5.806	4.9475	5.215	4.9125	6.1535	4.4675	4.516	4.8915
AP1M2	2.416	2.319	2.252	2.341	2.281	2.474	2.312	2.094	2.288	2.352	2.566	2.344	2.3	2.318	2.024	2.804	2.111	2.777	2.332	3.133	2.615	2.902	3.048	2.862	3.066	3.082	2.982	2.997	3.23	2.847	3.274	3.187	3.265	2.715	3.077	2.832	3.023	3.441	2.466	2.987	2.581	2.33	2.79	2.475	2.613	2.641	2.318	2.227	2.135
AP1S1	2.6035	2.84	2.413	2.558	2.6135	2.2295	2.8035	2.6755	2.433	2.5535	2.7345	2.606	2.7705	2.5585	2.7075	2.695	2.6545	2.6685	2.5835	3.109	3.1095	3.0475	3.0235	2.9695	3.0445	3.0885	3.152	2.9095	2.971	2.937	3.0015	2.776	2.931	2.8895	3.117	2.93	2.879	2.6585	2.5065	2.996	2.4325	2.274	2.616	2.4865	2.6825	2.774	2.573	2.2825	2.379
AP1S2	5.9426	6.0244	5.7946	5.5556	5.7936	5.6318	5.9598	5.876	5.1406	5.5182	5.767	5.4152	5.6474	5.976	5.7064	5.9696	6.1656	6.4198	5.4394	6.4936	6.6178	6.8542	6.0978	6.1954	6.4264	6.5298	6.369	6.4966	6.3806	6.7012	6.2744	6.4394	6.3916	6.6966	6.2454	6.4456	6.0354	6.4636	6.4734	6.2444	6.3556	6.3112	6.2846	6.3296	6.3668	5.947	5.966	6.46	6.699
AP1S2 /// LOC653653	2.862	2.815	2.797	2.878	2.691	2.919	3.115	2.588	3.079	2.375	2.728	2.484	2.334	2.78	2.91	2.734	2.988	3.77	2.442	2.97	2.941	3.634	3.033	2.961	3.545	2.97	3.106	2.997	3.175	3.391	3.067	3.531	3.541	3.299	2.763	3.291	2.945	3.361	2.873	2.699	3.211	3.366	3.219	2.694	3.656	2.6	2.508	2.864	2.932
AP1S3	2.75167	2.663	2.85867	2.795	2.74267	3.13233	2.717	2.69167	2.81333	2.76033	2.74967	2.79433	2.76	2.72633	2.66867	2.74933	2.75733	2.66467	2.77567	3.222	3.17067	3.19167	3.209	3.191	3.146	3.17867	3.11167	3.227	3.11867	3.11767	3.14067	3.26633	3.23233	3.26633	3.19667	3.118	3.25933	3.22633	2.498	2.376	2.55	2.55033	2.41	2.41033	2.45667	2.38133	2.51233	2.64767	2.42767
AP2A1	4.42025	4.27325	4.27425	4.43	4.29925	4.314	4.12925	4.06625	4.46225	4.862	4.4525	4.0705	4.554	4.1835	4.4675	4.58475	4.105	4.4295	4.34125	4.563	4.1755	4.54825	4.245	4.18525	4.57275	4.2685	4.25975	4.314	4.303	4.63575	4.28725	4.39975	4.062	3.9875	4.231	4.2525	4.245	4.13	3.0805	3.7595	3.217	3.3745	3.3695	3.4015	3.29225	3.72925	3.43375	2.8965	3.24975
AP2A2	5.564	5.79133	6.04067	5.963	5.78367	5.56433	5.641	5.849	6.15267	6.02367	5.865	5.57967	6.134	5.73967	5.903	5.70333	5.82	5.49033	5.96567	6.34	6.24933	6.13167	6.14133	6.08067	6.203	6.131	6.11667	6.00933	6.31533	6.00933	6.226	5.992	6.05567	6.13033	6.28333	6.29033	6.23267	6.134	5.016	5.41367	5.06	5.05767	4.72167	4.93833	4.82067	5.722	4.83533	4.77867	4.87133
AP2B1	7.3175	7.1425	7.149	7.315	6.9935	5.9385	6.922	7.038	7.303	7.597	6.96	7.0125	7.4	6.8625	7.3765	7.2235	7.176	7.054	7.1055	7.167	6.6255	7.316	7.0455	7.0245	7.2	6.9955	6.88	7.1115	7.2975	7.1985	6.8345	6.8975	6.7065	6.7525	6.8065	6.8055	6.9975	6.3475	6.2645	6.619	6.2815	6.6805	6.111	6.6	5.929	6.921	6.455	5.884	5.772
AP2M1	7.3156	7.036	7.3604	7.1718	6.9868	6.7438	6.867	6.7234	7.3574	7.7572	7.0274	6.7338	7.2968	6.8922	7.3338	7.2088	7.0066	7.0174	7.0598	7.1478	6.917	6.8824	6.7836	6.8278	7.1704	6.9482	6.8404	6.639	7.0436	7.1192	7.017	6.8094	6.6166	6.6898	6.917	6.895	6.9036	6.8348	5.8074	6.6622	5.9372	6.2388	6.1268	6.3742	5.723	6.7772	5.9826	5.266	5.6644
AP2S1	6.87867	6.68533	6.899	6.63567	6.50767	6.07767	6.30067	6.336	6.63433	6.95433	6.587	6.277	6.952	6.38767	6.59633	6.55033	6.48833	6.631	6.592	7.055	6.62633	6.84733	6.74267	6.512	6.90633	6.76267	6.59267	6.399	6.92633	7.21	6.873	6.64733	6.43833	6.59267	6.987	6.734	6.62533	6.551	4.88533	6.086	5.43867	5.58467	5.26933	5.73767	5.55	6.318	5.051	4.34767	4.83833
AP3B1	6.3315	6.963	6.4655	6.755	6.575	5.907	6.6445	6.318	6.4585	6.441	6.4145	6.4735	6.523	6.4635	6.6145	6.4185	6.2545	6.5665	6.1655	6.4285	6.414	6.386	6.636	6.2705	6.8625	6.515	6.4465	6.666	6.6365	6.415	6.428	6.152	6.3125	6.454	6.216	6.342	6.6425	6.2785	6.1725	6.5935	6.4775	6.7195	6.3215	6.475	6.1665	6.812	6.363	5.95	6.301
AP3B2	2.42967	2.34533	2.43867	2.315	2.37667	2.86233	2.263	2.38033	2.31033	2.61933	2.327	2.39667	2.40933	2.537	2.54633	2.23633	2.29467	2.39567	2.404	2.887	2.87633	2.99267	2.94	2.84533	2.92667	2.837	2.95933	2.89833	2.86833	2.93767	2.842	2.943	2.86033	2.882	3.229	2.81167	3.00767	2.883	2.26267	2.418	2.44633	2.297	2.36767	2.331	2.56967	2.31967	2.39533	2.308	2.38567
AP3D1	6.84033	6.806	6.70067	6.61633	6.69967	6.36967	6.619	6.287	6.72633	6.58133	6.52067	6.16	7.00867	6.376	6.756	6.487	6.27233	6.405	6.482	7.08267	6.82333	6.625	7.07	7.123	6.85667	7.05667	6.772	6.366	7.385	7.146	7.13033	6.27467	6.982	6.86867	7.06567	6.97	6.57067	6.567	5.677	5.89567	5.71767	5.866	5.33233	5.40033	5.43367	6.49833	5.41867	5.026	5.31467
AP3M1	6.525	6.533	6.25275	5.934	6.44725	5.6325	6.532	6.3645	6.256	6.39175	6.33575	6.5365	6.18075	6.2555	6.42425	6.44375	6.45	6.3505	6.5055	6.53	6.7985	6.86875	7.08225	6.58925	6.61425	6.78475	6.7255	6.81425	6.812	6.5225	6.5425	6.60975	6.83175	6.96	6.6435	6.6665	6.513	6.31925	6.50075	6.3995	6.42475	6.4785	6.13975	6.53	6.208	6.3965	6.231	6.42775	6.50275
AP3M2	5.59125	4.775	5.186	5.586	5.1435	5.55675	5.082	5.22775	4.9345	5.22525	5.22375	4.979	5.18725	5.105	5.26725	5.15275	5.51975	5.336	4.8795	5.99225	5.675	5.68825	5.17375	5.45425	5.32775	5.77425	5.35	5.59225	5.7675	5.51775	5.4465	5.60575	5.998	5.85325	5.47125	5.6975	5.21725	5.1555	4.81825	4.6835	4.41925	5.10875	4.4865	5.12425	4.56175	5.00775	4.745	4.8235	4.5085
AP3S1	9.817	9.812	10.108	9.561	9.835	10.19	10.021	10.123	9.681	9.602	10.002	9.938	9.748	10.137	9.708	9.801	10.111	10.04	9.755	10.835	10.794	10.693	10.596	10.824	10.695	10.613	10.624	10.738	10.45	10.621	10.642	10.857	10.699	10.788	10.766	10.512	10.638	10.915	10.756	10.159	10.341	10.039	10.313	10.115	10.483	9.83	10.43	10.472	10.694
AP3S2	5.8015	6.2265	6.05825	5.5705	6.231	5.378	5.43775	5.3015	5.8715	5.96775	6.03525	5.5325	6.089	5.51275	5.35	5.6075	5.644	5.61075	5.606	6.1965	6.09425	6.2635	6.49925	6.32225	6.7035	6.02325	6.046	5.905	6.51025	6.305	6.3155	6.055	5.95575	6.3085	6.032	6.30375	6.54575	5.82075	4.96725	5.913	5.49	5.19925	5.15925	5.5825	5.13375	5.8385	5.21025	5.09975	5.3425
AP4B1	6.60633	6.46767	6.37567	6.393	6.39933	6.19667	6.408	6.569	6.20367	6.52567	6.163	6.6	6.529	6.07333	6.50467	6.279	6.59667	6.17233	6.28567	6.93167	6.64867	6.68167	6.57433	6.92533	6.90833	6.627	6.852	6.91867	6.70267	6.39333	6.82467	6.201	7.10533	6.68267	6.933	6.636	7.05633	6.482	5.00133	5.86267	5.89633	6.13167	5.49033	6.16633	5.24	6.18167	5.74533	5.69167	5.472
AP4E1	3.49617	3.51317	3.47817	3.74217	3.5125	3.91083	3.43633	3.403	3.381	3.405	3.46183	3.44233	3.32717	3.77233	3.635	3.33383	3.47683	3.284	3.364	4.09033	4.0265	4.11883	3.98167	4.12033	3.94033	4.03217	4.0975	4.0905	4.00133	4.08717	4.02617	4.0855	3.97967	4.06883	3.97517	4.03633	4.26833	4.09667	3.73783	3.24083	3.52517	3.61183	3.3025	3.43733	3.3865	3.3825	3.35333	3.66733	3.54367
AP4M1	4.3712	4.494	4.3022	4.2792	4.6298	3.1818	4.1818	4.0142	4.2326	3.8088	4.2074	4.3648	4.2874	3.933	4.178	4.0104	4.413	3.7372	4.323	4.2356	4.0498	3.978	4.3794	4.1788	3.9194	4.1624	3.9536	3.9068	4.3022	4.139	4.1294	3.8794	3.9418	4.0152	3.9836	4.064	4.1058	3.7728	3.255	3.3858	3.3438	3.1934	3.3816	3.093	3.5194	3.611	3.176	2.9162	3.0748
AP4S1	3.0285	2.959	3.11	2.968	2.962	2.462	3.134	3.2005	2.717	2.8505	2.961	3.238	3.1355	2.93	3.233	3.241	2.9855	3.0115	2.7845	3.171	3.3015	3.096	3.5075	3.405	3.328	3.2	3.2075	3.433	3.258	3.1725	3.3885	3.173	3.3665	3.4025	3.4975	3.363	3.288	3.3265	2.9695	2.716	2.6915	2.9865	2.774	3.0665	2.9335	3.0705	2.775	3.0795	2.916
APAF1	5.08075	5.02475	4.089	4.79875	4.97525	4.2755	4.74575	4.32975	4.762	4.48325	4.648	4.423	4.75725	4.80425	4.8145	5.021	4.277	4.744	4.59575	4.85825	4.833	4.776	4.99375	4.64525	5.51025	5.4835	5.12675	4.85125	5.12375	5.392	5.22175	4.59475	4.7885	5.012	4.7165	5.25725	5.047	5.349	4.121	4.67975	4.24725	4.757	4.18225	4.29325	3.97725	4.6795	4.155	4.14225	4.38175
APBA1	2.4825	2.746	2.7515	3.157	2.7385	2.6565	2.6045	2.5265	2.955	2.576	2.8445	2.7165	2.82	2.73	2.502	2.5285	2.8	2.63	3.0235	3.08	3.2005	3.376	3.153	3.1285	2.8135	2.997	3.105	3.103	2.997	3.17	3.244	3.0355	3.141	3.2065	3.379	3.1205	3.2545	3.0905	2.779	2.63	2.486	2.5115	2.6795	2.8255	2.879	2.5265	2.633	2.7245	2.7755
APBA2	7.50633	7.09833	7.373	7.78033	7.42867	8.14233	7.299	7.133	7.91	7.47133	7.27	7.52733	7.32833	7.61667	7.30933	7.475	7.53433	6.54267	7.61067	8.09867	8.20233	7.48233	7.98467	7.938	8.098	8.04267	7.989	7.984	8.47733	7.23433	7.998	7.81967	9.15133	8	8.19233	8.24	8.036	7.73033	7.29533	6.463	7.10533	7.10867	7.27533	7.34467	7.674	7.98033	7.295	7.63233	7.12533
APBA3	4.993	5.442	5.349	5.323	5.22	5.252	5.593	5.19	5.679	5.197	5.48	5.279	5.502	5.223	5.12	5.38	5.389	5.328	5.737	5.323	5.628	5.104	5.672	5.624	5.255	5.794	5.659	5.089	5.723	5.602	5.645	5.252	5.661	5.404	5.52	5.936	5.008	5.219	4.469	4.302	4.301	4.296	4.308	4.294	4.994	4.575	4.369	4.024	4.508
APBB1	3.949	3.68743	3.77886	4.11243	3.73186	4.03114	3.61114	3.783	4.12757	3.89757	3.76114	4.00886	3.80871	3.89557	3.98286	3.87286	4.02714	3.67471	3.85186	4.00486	4.19014	3.93257	3.972	4.06357	3.99957	4.27871	4.08129	3.924	4.34071	3.99071	4.11914	3.87671	4.14814	4.02829	4.22171	4.11329	4.05143	3.93586	3.60114	3.10443	2.94986	3.225	3.076	3.11886	3.32771	3.347	3.20086	3.14543	3.15786
APBB1IP	6.986	7.6325	6.461	7.0645	7.152	7.1325	7.115	6.598	7.322	6.3365	7.131	6.912	7.2575	7.193	6.96	7.2275	6.384	6.7325	6.7845	7.418	7.518	8.001	7.883	6.941	7.823	7.557	7.9865	7.4785	7.8455	7.9505	7.572	7.3605	7.5025	7.502	7.476	7.676	7.654	7.4425	6.803	6.815	6.701	6.8485	6.591	6.918	6.2125	7.2435	6.608	6.6455	6.584
APBB2	2.88071	2.91243	2.75229	2.94614	2.93257	3.18486	2.80814	3.02814	2.82257	2.834	2.92229	2.818	3.14157	2.693	2.81271	2.893	2.77529	2.889	2.89386	3.59786	3.51814	3.346	3.59786	3.47471	3.68571	3.46171	3.673	3.49443	3.33157	3.51857	3.59529	3.51957	3.463	3.52686	3.92329	3.48957	3.63586	3.77929	2.83343	2.77229	2.978	2.88229	2.907	3.19829	2.87114	2.92686	2.86629	2.951	3.13929
APBB3	3.533	3.597	3.75433	3.41633	3.621	3.64767	3.434	3.18333	3.70433	3.42467	3.62167	3.348	3.75067	3.43	3.525	3.51033	3.554	3.51233	3.459	3.78167	3.62167	3.48667	3.41167	3.63267	3.814	3.91167	3.837	3.476	3.709	3.77767	3.636	3.56533	3.45067	3.48033	3.63767	3.62833	3.583	3.486	2.50033	3.17633	2.737	2.82767	2.82533	2.87467	2.91567	2.93567	2.96067	2.757	2.934
APC	5.12533	5.50133	5.51867	4.25833	5.435	4.71867	5.308	5.13833	5.21633	5.08	5.35233	5.37333	5.292	5.641	5.13933	5.41567	5.269	5.61067	5.55933	5.54967	6.05667	6.008	5.965	5.91733	6.14867	5.572	5.848	5.881	5.52	5.70067	5.62467	6.18267	5.25733	6.025	5.253	5.92367	5.61033	5.946	6.234	5.767	5.94267	5.201	5.51267	5.211	6.22867	4.723	5.37167	6.23	6.2
APC2	2.448	2.286	2.342	2.107	2.494	2.443	2.248	2.273	2.291	2.224	2.385	2.087	2.363	2.34	2.24	2.709	2.391	2.399	2.606	2.927	2.814	3.085	2.873	2.673	2.874	2.793	2.813	3.016	2.79	2.959	2.93	2.784	2.962	2.737	2.912	2.883	2.98	2.86	2.443	2.317	2.306	2.363	2.414	2.311	2.394	2.343	2.476	2.359	2.372
APCDD1	3.7425	3.2115	3.7165	3.3065	3.7865	4.279	3.5985	3.484	3.498	3.7495	3.7175	3.44	3.871	3.457	3.3725	3.4405	3.448	3.427	3.28	4.714	4.3075	4.465	4.0285	4.0425	4.458	4.219	4.127	3.9655	4.126	4.4995	4.1095	4.68	3.666	4.55	4.5135	4.255	4.309	4.712	3.422	3.265	3.478	3.0455	3.086	3.3085	3.013	3.099	3.3315	3.078	3.457
APCDD1L	2.70667	2.643	2.70467	2.496	2.65433	2.80467	2.56933	2.61067	2.911	2.70367	2.747	2.67867	2.68967	2.64933	2.696	2.53033	2.616	2.701	2.74567	3.027	2.909	2.94167	2.89067	2.874	2.85	2.85367	2.88967	3.089	2.88967	3.06267	3.08867	2.93233	2.92133	2.91767	3.07833	2.82333	2.91867	2.96	2.47367	2.39033	2.30567	2.57767	2.48167	2.35733	2.48633	2.505	2.522	2.38933	2.48733
APCS	2.859	2.644	2.512	2.524	2.597	2.794	2.705	2.613	2.561	2.825	2.431	2.383	2.719	2.787	2.714	2.76	2.612	2.544	2.684	2.78	3.034	2.934	2.979	2.848	2.86	3.209	3.137	3.196	2.87	2.86	3.208	2.946	2.953	3.052	2.888	2.74	3.002	2.934	2.415	2.844	2.669	2.804	2.795	2.669	2.984	2.598	2.338	2.46	2.619
APEH	7.097	7.005	7.289	7.328	7.11	6.418	7.132	6.94	7.477	7.328	7.16	7.165	7.343	6.978	7.106	6.994	7.035	7.061	7.272	7.108	7.218	7.08	7.41	7.426	7.077	7.315	7.178	7.131	7.683	7.402	7.474	7.089	7.22	7.112	7.508	7.307	7.045	7.096	6.96	6.666	6.552	6.653	6.482	6.679	7.086	6.871	6.691	6.175	6.274
APEX1	8.808	8.249	8.98	8.783	8.24	7.908	8.304	8.901	8.823	8.594	8.492	8.759	8.651	8.511	8.561	8.392	8.929	8.453	8.615	8.509	8.794	8.68	8.382	8.901	8.225	8.586	8.588	8.59	8.876	8.382	8.684	8.792	8.748	8.781	8.789	8.506	8.34	8.429	8.884	8.587	8.595	8.708	8.57	8.609	9.003	8.756	8.905	8.612	8.678
APEX2	5.0735	4.859	4.839	4.8265	4.6755	4.343	4.6275	4.8115	4.7785	4.8665	4.898	4.9295	5.042	4.5385	4.8685	4.629	4.827	4.716	4.971	4.5555	4.5265	4.454	4.671	4.641	4.6205	4.3665	4.6245	4.5395	4.658	4.658	4.5705	4.1615	4.393	4.452	4.915	4.472	4.917	4.5965	3.6625	3.7145	3.446	3.7805	3.589	3.817	4.1525	3.8875	3.937	3.4035	3.502
APH1A	6.17371	6.08943	5.79943	5.859	6.02829	5.79771	5.96557	5.90014	5.89886	5.96443	6.00271	5.939	6.07657	5.86729	5.99843	5.808	5.85571	5.85657	6.11786	5.97729	6.07243	6.14257	6.19471	5.98014	6.41714	6.33214	6.19271	6.15529	6.29786	6.31529	6.18014	5.91029	6.09643	6.00843	6.022	6.24471	5.94857	5.77157	5.06443	5.56429	5.29471	5.81614	5.32943	5.51071	5.16214	5.65557	5.215	4.92071	5.29986
APH1B	7.001	6.991	6.78217	6.77783	7.021	6.1335	6.82367	6.8855	6.696	7.0695	6.68983	7.03383	6.82833	6.84967	6.91733	6.8525	7.04267	6.91033	7.09567	7.65	7.34683	7.40683	7.70583	7.387	7.4645	7.31633	7.451	7.28667	7.40183	7.6195	7.41083	7.29117	7.335	7.52033	7.58933	7.7075	7.554	7.326	6.8015	7.047	7.05367	7.01867	6.98417	7.1765	6.699	7.25133	7.09417	6.92517	6.97883
API5	6.2275	6.1005	5.91925	5.72675	6.0545	5.69625	6.4665	6.39775	5.5145	5.68	6.1635	6.3175	5.517	6.1295	6.07475	6.27175	6.503	6.35425	6.17175	6.1405	6.2485	6.262	6.25525	6.33725	5.995	6.116	6.25925	6.3015	6.1045	5.759	6.26475	6.30275	6.28525	6.08625	6.04475	6.15825	5.893	5.9685	6.16425	5.72675	6.067	6.15425	5.8665	5.7825	6.043	5.57425	5.81	6.09575	6.13175
APIP	5.3695	4.899	4.7155	4.922	5.4615	3.9465	5.28	5.512	5.196	5.094	5.9435	5.7675	4.033	5.2815	6.069	4.564	5.197	4.9995	4.8235	3.7775	4.5655	4.311	3.9795	4.2235	4.6085	4.4535	4	5.0125	4.0215	4.466	3.6985	5.3955	4.039	4.5395	4.616	4.678	3.586	4.8255	6.244	5.02	5.96	4.347	5.958	4.9505	5.804	4.179	5.6915	6.49	6.3295
APITD1	4.127	3.428	3.5975	3.5635	3.604	3.7	3.621	4.227	4.1225	3.873	3.8365	4.121	3.158	3.8385	3.706	3.8185	4.5545	3.768	3.781	4.732	4.4905	4.2385	4.7195	4.69	4.4385	4.2865	4.8305	4.4895	4.3225	4.262	4.0195	4.257	4.3845	4.661	4.564	4.3845	4.4295	3.8965	4.57	3.44	3.8985	3.716	4.0925	3.7805	4.153	3.7045	3.9005	4.258	3.8125
APITD1 /// CORT	4.818	4.178	3.846	3.607	3.83	3.968	3.595	4.016	3.976	4.723	4.186	3.101	4.012	4.041	5.271	3.895	4.067	3.89	3.803	4.707	4.036	3.983	3.982	4.498	4.37	4.139	4.067	4.53	3.933	4.295	4.402	3.876	3.978	4.101	4.544	4.671	4.182	3.992	2.894	3.728	3.128	3.384	3.374	3.971	3.452	3.312	2.794	3.157	3.419
APLF	2.7775	2.5075	2.731	2.3435	2.695	3.123	2.6815	2.9935	2.299	2.609	2.7185	2.7195	2.221	2.5265	2.4145	2.809	2.877	2.537	2.6935	3.362	3.307	3.5275	3.001	3.439	2.798	3.2985	3.288	3.537	3.2205	2.9885	3.155	3.5265	3.482	3.317	3.272	3.3025	3.23	3.2505	3.83	2.6435	3.11	2.698	3.072	2.7375	3.0065	2.6725	3.0265	3.701	3.057
APLF /// PROKR1	3.378	2.768	3.322	3.797	3.774	3.518	3.212	3.183	3.08	3.392	3.465	3.27	2.792	3.606	3.465	3.146	3.324	3.233	3.214	3.192	2.725	3.19	2.939	2.814	3.097	3.373	3.15	3.089	3.124	3.053	3.349	3.321	3.153	2.987	3.205	2.944	3.062	3.368	2.938	2.304	2.553	2.732	2.749	2.655	3.45	2.76	2.37	4.019	2.647
APLN	2.657	2.548	2.674	2.781	2.43	2.853	2.575	2.436	2.777	2.401	2.265	2.692	2.815	2.721	2.945	2.583	2.62	2.47	2.346	3.01	2.885	2.97	3.033	2.989	2.954	2.971	3.034	2.843	3.346	3.076	2.842	3.138	2.894	2.895	3.154	2.932	3.173	2.954	2.2	2.681	2.537	2.439	2.324	2.544	2.563	2.526	2.527	2.638	2.314
APLNR	2.3495	2.4935	2.31	2.4135	2.3125	2.62	2.025	2.3355	2.226	2.288	2.298	2.3315	2.327	2.427	2.275	2.143	2.309	2.286	2.425	2.9975	3.018	3.0315	3.01	3.0045	3.0965	3.103	3.092	3.2295	3.0555	2.9675	3.185	3.248	3.088	3.042	3.057	3.05	3.168	3.0285	2.2415	2.4135	2.37	2.5385	2.318	2.4775	2.6005	2.3865	2.4795	2.5435	2.394
APLP1	2.14	2.09733	2.178	2.19333	2.07633	2.172	2.09733	2.12067	2.235	2.14767	2.295	2.094	2.09	2.07767	2.21033	2.15433	2.064	2.09133	2.12633	2.747	2.66567	2.815	2.60967	2.68433	2.73433	2.54867	2.72633	2.767	2.66533	2.687	2.73167	2.73433	2.728	2.7	2.81467	2.717	2.83467	2.67467	2.44567	2.34867	2.348	2.38067	2.43767	2.34233	2.355	2.259	2.41467	2.389	2.22633
APLP2	9.80275	10.059	9.6515	9.831	10.13	9.68725	9.56375	9.66325	9.82075	9.905	9.8625	9.729	9.8575	9.75625	9.7105	9.69275	9.638	9.5575	9.86625	10.1527	9.98875	9.839	10.1525	9.9365	10.5255	10.1375	9.9445	9.88	10.2357	10.1698	10.2662	9.6785	9.48375	10.0367	10.0672	10.1282	10.3845	10.1035	9.05875	9.8655	9.26825	9.80625	9.357	9.838	8.91125	10.0663	8.7875	9.13625	9.15025
APOA1	2.841	2.70267	2.9345	2.7685	2.6975	3.19317	2.6475	2.87633	2.86983	2.91017	2.77033	2.76233	2.77883	2.70383	2.70917	2.76417	2.86617	2.7535	2.906	3.36383	3.11433	3.2285	3.19867	3.237	3.17017	3.26117	3.04733	3.34067	3.1285	3.23333	3.20917	3.17717	3.20983	3.21733	3.4435	3.23617	3.2675	3.20333	2.56833	2.577	2.5645	2.54267	2.45717	2.54633	2.631	2.59983	2.6995	2.5425	2.59517
APOA1BP	5.4265	5.246	5.6095	5.4225	5.1105	5.5245	5.467	5.6295	5.249	5.4885	5.297	5.304	5.454	5.1775	5.4555	4.885	5.6505	5.071	5.731	5.923	5.9835	6.12	5.8315	6.166	5.471	5.8555	6.0375	5.7015	6.348	5.81	5.8185	5.73	5.9985	5.752	6.093	5.8165	5.788	5.7285	5.0225	4.914	4.8805	4.8765	4.9865	5.1495	5.424	5.1675	5.621	4.4855	4.869
APOA2	2.40967	2.27233	2.45967	2.485	2.41433	2.481	2.297	2.369	2.849	2.48233	2.27967	2.32833	2.289	2.42233	2.36	2.34267	2.52333	2.43033	2.459	2.87	2.85833	2.85367	2.78	2.866	2.783	2.75533	2.876	2.86567	2.69733	3.00733	2.84033	3.05033	2.805	2.83	3.02133	2.76	3.07233	3.032	2.28833	2.44433	2.524	2.29167	2.50833	2.513	2.492	2.47533	2.38067	2.52367	2.318
APOA4	3.063	3.522	3.335	3.272	3.162	3.245	3.177	3.344	3.264	3.449	3.563	3.208	3.13	3.353	2.995	3.746	3.22	3.192	3.36	4.248	3.95	3.869	4.124	4.263	4.097	4.077	3.833	3.808	4.228	4.304	4.069	4.053	3.92	4.009	4.178	4.25	4.193	4.124	3.172	3.186	3.25	2.874	3.23	3.08	2.948	3.005	3.154	3.226	2.741
APOA5	2.7025	2.4195	2.7145	2.4645	2.6485	2.7345	2.6325	2.604	2.7405	2.566	2.761	2.7095	2.674	2.6215	2.8255	2.6895	2.6195	2.6085	2.597	3.353	3.528	3.3735	3.651	3.4705	3.347	3.5135	3.4585	3.422	3.4965	3.463	3.6715	3.4875	3.5795	3.433	3.5915	3.582	3.563	3.3975	2.6395	3.07	2.5295	2.629	2.641	2.7775	2.671	2.625	2.576	2.5465	2.691
APOB	2.04225	1.901	2.08975	2.1465	1.99775	2.09725	1.997	2.05025	2.01525	1.9845	2.011	2.0995	2.15	2.022	2.00825	2.02325	2.007	1.965	2.08075	2.66225	2.60975	2.6525	2.74475	2.6815	2.66325	2.544	2.71225	2.82325	2.6485	2.59	2.619	2.668	2.6955	2.68	2.74525	2.631	2.7005	2.72275	2.23175	2.2615	2.30175	2.16475	2.2085	2.1825	2.3345	2.2505	2.446	2.2615	2.18075
APOB48R	6.632	6.627	6.14	6.577	6.367	6.857	6.191	5.631	7.125	6.031	6.786	5.948	6.61	6.245	6.449	6.528	5.283	6.174	6.18	6.337	6.505	6.179	6.984	5.769	7.039	6.394	6.502	6.16	6.659	7.038	6.795	5.835	5.763	6.041	6.28	6.805	6.625	6.983	4.304	5.283	4.427	5.23	5.128	4.85	4.059	5.409	4.242	3.843	4.227
APOBEC1	2.577	2.673	2.88	2.779	2.994	2.786	2.643	2.813	2.486	2.706	2.796	2.451	2.778	2.671	2.485	2.91	2.713	2.673	2.92	3.145	3.12	3.135	2.977	3.025	2.988	2.833	3.052	3.018	2.827	2.925	3.114	3.099	3.055	3.096	3.062	3.146	2.907	3.211	2.708	2.509	2.881	2.75	2.963	2.827	2.747	2.864	2.901	2.985	2.513
APOBEC2	3.9635	4.0735	4.151	3.624	4.1925	3.1355	4.4285	4.2765	4.0735	4.733	4.4625	4.706	4.01	4.2055	4.284	4.4025	4.0205	4.535	4.106	3.6895	3.854	4.131	3.8845	3.98	4.097	3.851	4.001	4.1675	3.9135	3.8225	4.178	3.8685	4.164	4.081	4.2115	4.0115	4.0375	4.056	2.856	3.4765	3.607	3.8475	3.2355	3.759	3.353	3.641	3.701	3.608	3.944
APOBEC3A	8.403	8.427	7.632	8.698	8.132	8.164	8.052	7.468	8.461	8.155	8.336	7.731	8.414	8.396	7.713	8.317	7.68	8.431	8.255	7.321	7.442	7.818	8.023	6.948	8.479	7.569	7.907	7.349	7.958	8.377	7.66	7.628	7.231	7.327	7.254	8.189	8.243	8.806	5.828	7.923	8.298	7.064	8.033	7.646	7.232	8.023	7.407	7.519	7.587
APOBEC3A /// APOBEC3B	7.069	7.293	6.501	7.397	6.932	7.289	6.951	6.325	7.167	7.017	7.297	6.585	7.243	7.268	6.496	6.96	6.364	7.165	6.943	6.545	6.762	6.98	7.126	6.343	7.359	6.386	7.023	6.203	7.083	7.37	6.466	6.566	6.369	6.593	6.114	7.405	7.223	7.513	5.099	6.317	6.857	6.03	6.946	6.41	6.275	6.878	6.196	6.101	6.437
APOBEC3B	3.265	3.11	3.961	2.938	3.138	9.572	3.52	3.687	4.7005	3.4945	3.487	3.3075	3.5555	3.1775	8.682	4.783	4.268	3.886	3.897	4.5255	4.9545	10.4005	5.77	7.439	4.51	10.206	5.9575	4.7045	4.9755	5.286	5.8355	5.054	4.8865	4.2305	4.904	5.4055	4.874	10.67	3.8335	3.5105	10.2325	3.059	3.7065	3.113	3.6165	3.139	3.5115	3.6895	3.9285
APOBEC3C	9.59567	9.406	9.40633	9.48133	9.272	8.80933	9.61567	9.53333	9.42467	9.936	9.214	9.19733	9.77	8.90433	9.76733	9.362	9.226	9.335	9.654	10.2283	10.1117	10.1003	10.0727	10.4177	9.97167	10.381	10.2127	10.1717	10.3053	10.0973	10.2393	9.868	10.5613	9.87767	10.0877	10.0067	9.90833	9.99967	9.245	9.58633	9.273	9.56933	8.89367	9.37533	9.03	9.77133	9.343	8.77533	9.00233
APOBEC3D	9.785	9.089	9.319	9.844	8.842	8.744	9.643	9.399	9.721	9.587	8.81	9.338	9.769	9.011	9.512	9.029	9.439	9.284	9.298	10.312	10.307	10.436	10.076	10.576	9.511	10.266	10.412	10.13	10.407	9.95	10.35	10.044	10.764	10.311	10.483	10.081	10.187	10.227	8.89	9.09	9.104	9.17	8.842	9.415	9.437	9.398	9.666	9.061	8.824
APOBEC3F	5.041	5.0802	5.301	5.1416	5.1646	4.7526	5.2408	5.3144	5.1118	5.3542	4.8842	5.347	5.5516	4.9442	5.4274	4.8146	5.301	5.1966	5.2724	6.004	6.1136	6.4994	6.3496	6.636	5.7192	6.1644	6.2282	6.1998	6.1138	5.9458	6.0758	5.99	6.4644	6.0726	6.7976	5.7824	6.0748	6.0402	5.0914	5.0584	5.0054	5.3512	5.3478	5.2816	5.0704	5.1522	5.3278	5.0362	4.695
APOBEC3G	6.87	6.6455	6.777	6.8805	6.7135	6.547	6.953	6.952	6.679	6.8875	6.8055	6.688	6.875	6.5255	6.909	6.5895	6.8735	6.745	6.862	7.633	7.663	7.8035	7.6755	7.84	7.3295	7.6955	7.883	7.651	7.74	7.584	7.639	7.6245	8.057	7.5555	7.874	7.572	7.6645	7.56	6.7425	6.7725	6.9865	6.497	6.5385	6.8165	6.8655	6.6855	6.721	6.5855	6.5015
APOBEC3H	3.794	4.01733	3.92267	4.418	4.24767	4.049	4.35733	4.17367	4.139	4.02	3.77	3.24567	4.34267	3.68733	3.97567	3.843	4.04367	3.68967	4.44533	4.99333	4.56467	4.633	4.425	4.943	4.06333	4.60767	4.70933	4.767	4.743	4.62467	4.46333	4.31067	5.30733	4.30967	4.41367	4.39567	4.83867	4.256	3.777	3.64933	4.01467	3.16833	3.47633	3.32067	3.753	3.819	3.59867	3.62	3.11467
APOBEC4	2.447	2.598	2.722	2.498	3.118	2.396	2.401	2.163	2.688	2.238	2.548	2.469	2.289	2.569	2.246	2.471	2.452	2.633	3.181	3.108	3.22	3.215	3.186	3.113	3.085	3.044	3.151	2.929	3.092	3.013	3.277	3.086	3.523	3.097	3.052	3.112	3.342	3.163	2.717	2.783	2.756	2.665	3.056	2.759	2.856	2.579	2.896	2.843	3.019
APOC1	3.01567	3.06467	3.08333	3.59633	3.09267	3.07867	2.89833	2.81967	2.96233	3.107	3.086	2.83033	2.861	3.01967	3.01933	3.01867	2.84133	2.91867	2.91067	3.86733	3.733	3.53933	3.69433	3.63567	3.70333	3.62067	4.024	3.701	3.665	3.79533	3.82967	3.75333	3.57033	3.59867	3.75433	3.65033	3.89767	3.87333	2.527	2.66633	2.412	2.39633	2.56233	2.41167	2.73867	2.45567	2.49633	2.67367	2.362
APOC1 /// APOE	3.242	3.586	3.485	3.32	3.312	3.363	3.15	3.248	3.541	3.391	3.566	3.116	3.353	3.254	3.36	3.135	3.585	3.251	3.558	4.912	4.857	4.735	4.702	4.575	4.49	4.711	4.613	4.525	4.422	4.75	4.886	4.648	4.487	4.632	4.902	4.823	4.813	4.536	2.273	2.778	2.535	2.652	2.624	2.458	2.497	2.959	2.369	2.61	2.712
APOC1P1	2.493	2.258	2.533	2.572	2.186	2.426	2.169	2.138	2.398	2.361	2.394	2.239	2.285	2.551	2.371	2.962	2.342	2.182	2.236	2.954	2.812	2.98	2.884	2.876	2.681	3.315	3.116	3.115	3.011	3.325	3	2.837	2.824	3.12	3.018	2.99	2.897	2.972	2.421	2.334	2.267	2.29	2.483	2.557	2.348	2.531	2.593	2.575	2.449
APOC2	3.021	2.743	2.77133	3.09067	2.88667	2.79433	2.70033	2.959	3.022	3.01867	3.07067	2.78167	2.881	2.72867	2.83133	2.94533	2.76833	2.66633	2.92767	3.235	3.239	3.21133	3.23333	3.16433	3.23233	3.08233	3.29233	3.43167	3.18333	3.27767	3.23367	3.27133	3.498	3.084	3.38033	3.576	3.38433	3.42867	2.48267	2.863	2.61333	2.32733	2.58333	2.53433	2.761	2.723	2.52267	2.67967	2.539
APOC3	2.459	2.525	2.302	2.706	2.338	2.475	2.503	2.496	2.591	2.162	2.392	2.283	2.368	2.516	2.412	2.587	2.501	2.461	2.427	3.121	3.12	3.117	3.083	3.052	3.005	3.103	3.298	2.922	3.162	3.128	3.276	3.118	3.3	3.066	3.272	3.261	3.254	3.045	2.402	2.608	2.59	2.345	2.601	2.913	2.529	2.656	2.457	2.531	2.402
APOC4	2.639	2.511	2.733	2.129	2.528	2.563	2.361	2.276	2.839	2.505	2.617	2.46	2.6	2.576	2.317	2.664	2.344	2.372	2.342	3.177	3.187	3.072	3.344	3.245	3.307	3.393	3.209	3.148	3.092	3.48	3.428	3.476	3.324	3.479	3.309	3.263	3.41	3.457	2.261	2.588	2.765	2.543	2.678	2.728	2.815	2.661	2.958	2.905	2.592
APOD	2.09533	2.11067	2.07133	2.22733	2.25333	2.183	2.14167	2.075	2.28533	1.99733	2.244	2.06867	2.12633	2.215	2.038	2.157	1.938	2.07567	2.198	2.82	2.72867	2.763	2.85033	2.83233	3.037	2.831	2.84467	2.852	2.778	2.79333	2.88633	2.86533	2.808	3.07233	2.85933	2.752	2.972	2.704	2.36267	2.39833	2.368	2.21767	2.411	2.31833	2.28733	2.269	2.28167	2.44267	2.361
APOE	2.764	2.643	3.088	2.73	2.634	3.184	2.683	2.701	2.887	2.626	2.825	2.486	2.677	2.763	2.606	2.785	2.694	2.558	2.54	3.387	3.308	3.194	3.615	3.405	3.51	3.404	3.606	3.39	3.484	3.424	3.45	3.475	3.29	3.292	3.542	3.341	3.298	3.343	2.31	2.328	2.585	2.359	2.476	2.365	2.358	2.36	2.473	2.422	2.394
APOF	2.003	2.114	1.839	1.96	2.127	2.719	2.067	2.123	2.323	2.294	2.127	1.985	2.031	1.933	1.751	2.263	2.197	1.973	1.802	3.584	2.597	2.795	2.65	2.93	2.889	2.754	2.734	2.876	2.531	2.868	2.729	2.68	2.888	2.795	2.833	2.889	2.818	2.755	2.616	2.351	2.231	2.661	2.469	2.697	2.401	2.33	2.545	2.708	2.59
APOH	2.121	1.83	2.118	2.172	2.045	2.147	1.952	2.024	2.103	2.01	2.065	2.028	1.91	1.929	2.072	1.658	2.221	2.13	1.88	2.807	2.783	2.88	2.917	2.912	2.759	2.566	2.698	2.817	2.683	2.819	2.576	2.869	2.892	2.804	3.043	2.945	3.002	2.817	2.935	2.561	2.599	2.373	2.555	2.593	2.684	2.381	2.546	2.545	2.505
APOL1	6.15811	6.29533	5.65033	6.56978	5.96578	5.79067	6.10678	5.30178	6.35	6.06278	6.07789	5.75467	6.62944	5.97822	6.17033	6.13167	5.39756	6.05489	6.15244	6.05544	6.05622	6.62544	7.05356	6.16756	6.47444	6.20433	7.03622	6.25011	6.56833	6.90522	6.62644	5.87078	6.23211	5.941	6.14067	6.23111	6.40867	6.24689	4.98289	5.36444	5.40722	5.80622	5.47578	5.64911	5.03178	5.76778	5.33533	4.529	4.71122
APOL1 /// APOL2	9.881	10.03	9.657	10.421	9.749	8.95	9.936	9.297	10.153	9.742	9.856	9.542	10.33	9.84	9.968	9.826	9.457	9.891	9.794	10.326	10.342	10.739	11.128	10.588	10.525	10.457	11.066	10.644	10.912	10.768	10.843	10.413	10.661	10.394	10.585	10.63	10.715	10.54	8.846	9.524	9.749	9.83	9.52	9.703	9.011	9.937	9.551	9.088	9.027
APOL2	5.386	6.02	4.219	5.739	5.678	4.506	5.442	4.531	5.019	4.548	5.348	5.013	5.684	5.118	5.214	5.625	5.265	5.555	5.148	4.357	4.417	4.659	5.414	4.737	5.065	4.555	5.004	4.538	4.901	5.062	4.62	4.462	5.079	4.47	4.595	4.439	5.026	5.077	3.361	4.243	4.545	3.946	4.427	4.498	3.623	4.851	3.999	3.452	3.785
APOL3	8.60767	8.643	8.74367	8.75933	8.44833	7.743	8.39433	8.591	8.61933	8.95867	8.51167	8.722	8.91567	7.95667	8.97133	8.20667	8.612	8.342	8.65233	8.86967	9.011	9.15333	9.16767	9.20167	8.42767	9.24467	9.082	9.176	9.31933	8.89867	8.816	9.20533	9.08167	9.078	8.91267	8.97633	8.48867	8.66533	7.96133	8.33667	8.306	8.76767	8.02867	8.36767	8.07733	8.738	8.19333	8.11233	8.03133
APOL4	2.733	2.69525	2.7655	2.9135	2.51875	2.56475	2.674	2.66125	2.712	2.749	2.587	2.70575	2.81025	2.6275	2.62325	2.62875	2.549	2.6205	2.74575	3.18975	3.09625	2.99275	3.228	3.046	3.1105	2.97225	3.0805	3.088	3.1185	3.078	2.951	2.979	3.1275	3.07	3.2005	3.128	3.16825	3.13	2.3725	2.48075	2.69375	2.56825	2.50225	2.58175	2.60325	2.747	2.58475	2.52125	2.598
APOL5	2.457	2.04	2.224	2.508	2.157	2.557	2.524	1.878	2.125	2.282	2.087	2.179	2.348	2.224	2.048	2.328	2.113	2.234	2.208	2.615	2.677	2.487	2.612	2.77	2.479	2.653	2.767	2.548	2.61	2.496	2.815	2.653	2.538	2.73	2.799	2.596	2.642	3.017	1.984	2.155	2.229	2.206	2.098	2.234	2.26	2.212	2.36	2.117	2.047
APOL6	5.677	5.7946	5.5172	6.192	5.4124	5.404	5.828	5.3638	5.615	5.6418	5.4986	5.5726	5.968	5.3788	5.6826	5.5984	5.5186	5.5006	5.59	6.0212	5.4402	6.4648	6.6424	5.9018	5.5594	6.0722	6.4662	6.0824	5.968	6.2146	6.099	5.9272	6.2498	5.7836	5.9406	5.7454	6.1352	5.6704	5.0194	5.2644	5.7434	5.5318	5.4004	5.5612	5.7644	5.7112	5.3798	5.0612	5.1624
APOLD1	2.9455	3.194	2.665	2.9405	2.9025	3.4145	3.2545	3.1275	2.9315	2.924	3.3345	3.071	3.275	3.113	2.8435	3.1255	2.871	3.012	3.0935	3.532	4.3615	4.173	3.5855	4.129	3.7005	3.817	3.75	3.8095	3.7175	3.745	3.546	3.9645	4.557	3.681	3.688	3.7195	3.5955	3.4225	3.586	3.3665	3.241	3.3705	3.492	2.891	2.948	2.772	3.496	3.7555	3.01
APOM	4.161	4.246	4.342	3.666	3.786	4.73	3.925	3.94	4.163	3.888	4.161	3.669	3.965	3.886	4.107	4.697	4.032	4.126	3.586	4.006	4.016	4.012	3.974	4.434	3.858	3.848	3.486	4.05	3.964	3.994	3.956	3.922	4.104	3.913	3.675	3.921	3.665	3.944	3.175	3.328	3.49	3.819	3.389	3.458	3.42	3.612	3.551	3.536	3.782
APOO	5.629	5.654	6.11	6.28	5.679	6.406	5.651	5.609	6.14	6.059	6.322	5.958	6.291	5.969	5.841	5.635	6.133	6.043	6.211	7.277	7.645	7.059	6.754	7.529	7.134	7.47	7.432	7.428	7.054	6.874	7.342	7.213	6.988	7.014	7.201	6.778	7.361	7.055	7.267	6.523	6.685	6.358	6.436	7.139	6.84	6.465	7.153	6.589	6.562
APOOL	6.2335	6.126	5.9555	6.007	5.9525	5.635	5.8995	6.038	5.761	6.1545	5.3625	5.98	6.033	5.6925	6.3315	5.883	6.122	5.945	5.5655	6.65	6.709	6.6305	6.4715	6.779	6.3575	7.0025	6.83	6.5375	6.898	6.4535	6.7055	6.383	6.9135	6.774	6.695	6.7525	6.373	6.362	6.621	6.046	5.8455	5.8525	5.672	6.418	6.1525	6.463	5.8135	5.6605	5.86
APP	6.63477	6.54823	6.657	6.75162	6.79131	6.51992	6.36646	6.63254	6.28985	7.15123	6.41477	6.52338	6.523	6.60738	6.85677	6.528	6.84792	6.40615	6.694	6.47123	6.19169	6.048	6.60392	6.31631	6.51262	5.98762	6.01338	6.44146	6.32592	6.46338	6.32892	6.04038	6.134	6.37331	6.59985	6.321	6.55908	5.93108	5.62746	5.75546	5.51746	5.90138	5.70292	5.97308	5.02408	6.125	5.88354	5.76169	5.48154
APPBP2	7.3278	7.3064	7.18	6.7034	7.468	6.874	7.4256	7.6376	6.9202	6.9936	7.242	7.5652	6.8828	7.6302	7.031	7.207	7.484	7.4998	7.435	8.0522	8.0576	8.1166	8.0464	8.0904	7.9854	7.9546	7.875	7.9822	7.71	7.8244	7.9166	8.156	8.0742	8.1454	7.976	8.0194	8.2286	7.9248	8.3692	7.7484	7.8066	7.8724	7.87	7.8404	7.6338	7.472	7.81	8.2212	8.1108
APPL1	5.63338	5.52075	5.42875	5.17025	5.424	5.079	5.709	5.99688	4.84125	5.69825	5.40937	5.80013	5.24437	5.58113	5.48588	5.48738	5.56712	5.61838	5.174	6.0395	6.307	6.03062	6.05925	6.11425	6.33237	6.1815	6.17075	6.23637	6.158	5.86587	6.18187	6.191	6.34738	6.43112	5.67225	5.95887	5.80675	5.73075	6.04675	5.25025	5.73163	5.91387	5.25863	5.74587	5.42825	5.76938	6.0275	5.58437	5.87488
APPL2	7.08375	7.17275	6.38225	6.68075	6.90925	7.0455	6.854	6.49825	6.692	6.35725	7.0225	6.8855	6.29875	6.7575	6.698	7.04375	6.35475	6.6485	6.549	6.669	6.9725	7.06725	7.05725	6.5585	7.40425	7.26175	7.15275	7.02775	7.10375	7.3765	7.0215	6.858	7.1795	7.08825	6.87075	7.37725	7.40225	7.00825	6.0525	6.91225	6.933	6.96425	7.0245	6.8465	6.17675	6.83625	6.29875	6.82225	6.6975
APRT	9.678	9.403	9.745	9.915	9.358	9.233	9.42	9.659	9.722	9.763	9.535	9.495	9.72	9.393	9.455	9.654	9.741	9.203	9.305	9.283	9.243	9.212	9.102	9.488	9.077	9.207	9.212	9.255	9.668	9.418	9.232	9.15	8.554	8.957	9.546	9.331	9.214	9.463	8.872	9.203	8.93	9.313	8.944	9.116	9.417	9.305	9.248	8.671	8.916
APTX	5.44717	5.24717	5.86667	4.83717	5.55083	4.95033	5.60433	5.74917	5.61417	5.45083	5.33733	5.63517	5.56783	5.662	5.58433	5.40467	5.97067	5.188	5.28233	6.23017	6.3925	6.375	6.25483	6.586	6.127	6.475	6.19	6.62783	6.49933	6.1905	6.111	6.61883	6.3775	6.51233	6.34583	6.43383	5.98783	5.8695	5.2825	5.574	6.015	5.38417	5.62183	5.52533	5.56367	5.66917	5.76033	5.984	5.82883
AQP1	2.523	2.46367	3.05233	2.323	2.61167	2.604	2.69067	2.50367	2.70833	3.453	2.55933	2.42833	2.61367	2.98167	3.12633	3.16467	2.60933	2.86633	2.69733	3.71833	2.88467	3.32967	3.10533	3.001	3.358	3.17033	2.92467	3.31333	3.10933	3.22967	2.984	3.24167	2.94167	3.035	3.095	3.217	3.05	3.01933	2.52733	2.867	2.779	2.52567	2.48133	2.72733	2.66233	2.52633	2.71067	2.85867	2.71933
AQP1 /// FAM188B	3.306	2.969	3.503	3.366	3.282	3.575	3.242	3.061	2.906	2.905	3.135	3.305	2.965	3.301	3.149	3.212	3.314	3.108	3.264	4.415	3.959	4.134	4.236	4.118	4.249	3.801	4.137	4.16	4.008	4.133	4.151	4.183	4.199	3.92	4.416	4.024	4.237	3.878	2.649	3.076	2.961	2.709	2.927	2.868	3.013	2.433	2.889	3.047	2.876
AQP10	2.5385	2.3725	2.633	2.571	2.4365	2.5995	2.4665	2.483	2.591	3.1855	2.571	2.2905	2.599	2.495	2.8335	2.574	2.5305	2.6	2.5505	3.254	3.0545	3.253	3.2895	3.1895	3.07	3.3335	3.1535	3.2335	3.0895	3.3395	3.1885	3.258	3.3325	3.197	3.2425	3.2415	3.4585	3.31	2.4435	2.6155	2.474	2.3045	2.484	2.5165	2.618	2.376	2.557	2.43	2.307
AQP11	3.994	4.2175	4.1435	4.211	4.227	3.9485	4.247	4.3375	3.9595	4.3265	4.382	4.3735	3.8965	4.1825	4.416	4.6345	4.3985	4.5405	4.192	4.7695	4.8685	4.8395	4.55	4.628	4.6745	4.8025	4.9115	4.686	4.673	4.725	4.6955	4.887	5.1375	4.737	4.502	4.857	4.6355	4.5755	4.1875	4.437	4.32	4.584	4.216	4.506	4.468	4.5055	4.3325	4.5785	4.5085
AQP12A /// AQP12B	2.844	2.794	3.074	2.656	2.844	2.698	2.412	2.519	3.014	2.859	2.824	2.48	2.707	2.669	2.646	2.553	2.93	2.455	2.245	3.347	3.416	3.423	3.615	3.676	3.362	3.398	3.221	3.768	3.687	3.486	3.421	3.555	3.396	3.324	3.55	3.486	3.49	3.575	2.898	2.781	2.801	2.711	2.724	2.747	2.783	2.902	2.631	2.838	2.681
AQP2	3.09667	2.95533	2.96933	3.10133	2.83833	3.12833	2.864	3.163	3.04633	2.92767	2.92933	2.83367	3.074	3.14833	2.94733	3.10933	2.88333	2.89133	3.08433	3.45333	3.459	3.44267	3.44333	3.392	3.34367	3.33133	3.504	3.24467	3.38133	3.33233	3.41467	3.531	3.46467	3.45167	3.61267	3.34667	3.52367	3.409	2.69867	2.79533	2.73433	2.642	2.73667	2.99333	2.81933	2.646	2.85133	2.78067	2.73733
AQP3	6.45533	6.38933	6.212	6.77633	6.07367	5.188	6.648	6.307	5.96133	6.40633	6.57933	6.596	6.249	6.156	6.694	6.477	6.45033	5.88033	5.92433	6.02433	6.255	6.425	6.041	6.504	6.16267	6.649	6.39067	6.77267	6.81367	6.719	6.34267	6.16633	6.38167	6.297	6.43267	6.89233	6.16367	6.06767	5.51733	5.55367	5.352	6.01967	5.55567	6.067	5.116	5.99567	5.25867	5.45967	5.49967
AQP4	1.9556	2.0822	2.068	2.143	1.9328	2.1374	1.9374	1.9906	2.0544	2.0302	2.0114	1.9694	2.1776	2.0392	2.0256	2.1306	2.0548	2.081	2.0202	2.5454	2.6186	2.6584	2.701	2.648	2.6652	2.6542	2.5646	2.7976	2.5364	2.6828	2.6138	2.659	2.7274	2.6652	2.5736	2.5518	2.6246	2.6532	2.3558	2.2546	2.2728	2.286	2.2814	2.2504	2.2438	2.1892	2.2586	2.3688	2.246
AQP5	2.339	2.123	2.233	2.201	2.066	2.231	2.267	2.224	2.41	2.161	2.268	2.105	2.119	2.425	2.351	2.268	1.856	2.045	2.262	2.836	2.606	2.619	2.653	2.808	2.737	2.567	2.84	2.61	2.79	2.968	2.746	2.733	2.694	2.779	3.01	2.891	2.813	2.869	1.953	2.293	2.263	2.172	2.079	2.188	2.035	2.374	2.154	2.133	2.025
AQP6	2.3655	2.2945	2.408	2.322	2.493	2.2475	2.2485	2.2765	2.5325	2.4125	2.5145	2.257	2.3845	2.206	1.989	2.3445	2.1975	2.112	2.5045	3.105	3.134	3.0865	3.137	3.0955	3.11	3.16	2.9675	3.0295	3.032	3.019	3.04	3.13	2.9395	3.07	3.066	3.075	3.188	3.1575	2.479	2.4325	2.373	2.319	2.306	2.201	2.3365	2.5115	2.314	2.573	2.377
AQP7	3.14617	2.9195	2.99867	3.07733	2.94033	3.19	2.939	2.9785	3.06817	3.21783	3.04067	2.78217	3.07867	2.99183	2.8915	2.91917	2.74333	3	3.018	3.218	3.211	3.05883	3.109	3.11567	3.23333	3.15783	3.309	3.09417	3.19567	3.156	3.2065	3.19	3.0775	3.0295	3.295	3.2375	3.23233	3.06483	2.3355	2.54867	2.38933	2.388	2.44183	2.436	2.56983	2.55233	2.40417	2.32483	2.28783
AQP7 /// AQP7P1 /// AQP7P2 /// LOC100132938	1.916	2.351	2.336	2.479	2.571	2.389	2.451	2.279	2.386	2.099	2.422	1.885	2.317	2.223	2.277	2.337	2.248	2.325	2.624	2.826	3.043	2.846	3.005	2.946	2.897	2.919	2.909	2.985	3.2	2.74	3.022	2.792	2.916	2.946	2.88	2.881	2.955	3.128	2.374	2.264	2.343	2.261	2.241	2.491	2.344	2.575	2.609	2.487	2.828
AQP8	2.521	2.693	2.589	2.619	2.593	3.34	2.554	2.549	2.462	2.72	2.653	2.695	2.774	2.379	2.247	2.428	2.619	2.44	2.769	3.09	3.106	3.218	2.961	3.273	3.063	3.077	3.141	2.895	3.108	3.076	3.206	3.021	3.136	3.184	3.246	3.004	3.192	3.089	2.39	2.368	2.646	2.679	2.508	2.735	2.627	2.718	2.622	2.513	2.613
AQP9	9.25867	9.447	8.29567	9.08133	9.144	8.99133	9.01567	8.41033	9.19733	8.237	9.37533	8.467	8.86867	9.43667	8.671	9.36233	7.63	9.08667	9.065	8.96967	9.04867	8.35133	9.478	7.94767	9.687	8.90733	9.39033	8.89833	8.65533	9.51433	9.363	9.025	8.05033	8.89033	8.60967	9.06333	9.64267	9.56133	8.10033	9.02067	9.086	8.538	9.12633	8.89533	8.101	9.11567	8.79633	8.643	8.88867
AQPEP	2.46067	2.70133	2.63467	2.737	2.68133	2.774	2.50667	2.61667	2.582	2.571	2.553	2.69	2.63133	2.68867	2.445	2.739	2.70333	2.629	2.683	3.13267	3.23933	3.15867	3.26633	3.119	3.201	3.24367	3.14467	3.35467	3.167	3.11633	3.15233	3.32867	3.208	3.17667	3.20067	3.239	3.188	3.206	2.52933	2.64167	2.676	2.62333	2.748	2.52333	2.939	2.484	2.67033	2.80967	2.59633
AQR	7.2975	7.3485	7.2625	7.455	7.5775	6.676	7.259	7.4655	7.3035	7.4165	7.262	7.5265	7.4115	7.2915	7.3005	7.549	7.571	7.2295	7.233	7.2475	7.332	7.424	7.534	7.3835	7.7675	7.516	7.5725	7.855	7.6545	7.336	7.41	7.394	7.8375	7.6055	7.462	7.6675	7.915	7.4215	6.9195	7.353	7.1125	7.5465	6.854	7.1885	6.976	7.3255	6.856	7.219	7.048
AR	2.373	2.3605	2.447	2.50125	2.3595	2.33725	2.255	2.3925	2.36375	2.44375	2.457	2.2655	2.347	2.48075	2.343	2.3245	2.24375	2.27575	2.31575	3.04275	2.956	2.91325	3.036	2.95925	2.95675	2.9285	2.91825	3.05	2.9295	2.93175	3.0495	2.914	3.00625	2.88	3.0325	2.88525	3.058	2.91725	2.4475	2.433	2.40025	2.4535	2.49275	2.388	2.421	2.4455	2.359	2.46225	2.403
ARAF	5.6376	5.5556	5.6148	5.7124	5.7684	5.6736	5.5258	5.6188	5.8238	5.6514	5.7086	5.5768	5.779	5.387	5.6268	5.4218	5.6896	5.4926	5.725	6.168	6.0204	5.724	5.917	5.96	6.0574	6.0472	5.9116	5.886	6.2008	6.036	6.0768	6.0158	5.7766	5.9162	6.1628	6.1128	6.0298	6.0412	5.0128	5.321	5.0416	5.1502	5.2286	5.1236	5.367	5.582	5.265	4.9948	5.1586
ARAP1	7.231	7.27	6.6065	7.1105	7.248	6.396	6.9395	6.522	7.535	6.5335	7.3175	6.6255	7.0685	7.217	6.8485	6.894	6.4595	7.0185	7.1325	6.222	6.456	6.146	6.815	6.082	7.208	6.5325	6.631	6.1145	7.0395	6.929	6.781	6.37	5.7265	6.244	6.275	6.7545	6.8565	6.869	5.2865	6.265	5.8415	5.8525	6.0175	5.5835	6.364	6.207	5.5885	5.043	5.454
ARAP2	8.3425	8.806	9.161	8.487	9.0115	8.8275	9.3695	9.65	8.595	9.127	8.8375	9.23	8.46	8.7905	8.767	8.1865	9.2035	8.525	9.1915	9.7335	10.052	10.2365	10.1865	10.319	9.353	9.682	10.019	10.145	9.435	9.4845	9.7	10.206	10.292	9.8235	9.8905	9.6255	9.98	9.832	10.066	9.1725	9.917	9.4095	9.635	9.351	9.858	8.5555	9.932	10.029	9.9205
ARAP3	6.0055	6.071	5.6945	5.947	5.8575	6.2215	5.6965	5.496	6.498	5.465	6.0675	5.6495	6.0275	6.283	5.92	5.8435	5.102	5.8005	6.141	6.006	5.944	5.784	6.357	5.793	6.301	5.6585	6.0415	5.99	6.156	6.312	6.312	6.1575	5.6755	5.952	6.195	6.0385	6.589	6.435	5.134	5.462	4.8745	4.9385	5.2545	5.07	5.0575	5.3755	5.1745	5.309	5.3035
ARC	2.726	2.396	2.752	2.985	2.669	2.865	2.576	2.675	2.568	2.812	2.365	2.622	2.569	2.614	2.363	2.631	2.637	2.614	2.57	3.203	2.925	2.802	2.93	3.096	2.973	2.94	3.028	2.835	2.941	2.88	2.971	2.845	3.307	3.035	2.924	2.911	2.937	2.993	2.432	2.879	2.643	2.45	2.46	2.554	2.395	2.443	2.8	2.652	2.616
ARCN1	7.283	7.563	7.058	7.49933	7.38967	6.21767	7.122	7.21033	7.055	7.152	6.953	7.58933	7.15433	7.02833	7.197	7.14033	6.97	7.18833	7.189	7.492	7.306	7.148	7.54333	7.47767	7.725	7.336	7.44	7.509	7.45667	7.43867	7.49567	7.04	7.012	7.03767	7.352	7.561	7.41933	7.15767	6.31833	6.71967	6.50033	7.269	6.44167	6.999	5.689	7.17833	6.33367	6.26933	6.504
AREG	2.504	2.363	2.477	2.447	2.155	4.297	2.319	2.437	2.613	2.43	2.508	2.584	2.455	2.391	2.588	2.709	2.548	2.188	2.473	2.999	3.086	2.865	2.982	3.03	2.94	3.042	3.061	3.3	2.846	3.156	2.961	2.986	2.981	2.926	3.226	2.903	3.097	3.281	2.661	2.958	2.79	2.416	2.504	2.402	3.006	2.515	2.52	2.727	2.365
ARF1	10.3995	10.5195	10.2445	10.4235	10.4115	10.36	10.276	10.1225	10.3875	10.4665	10.3695	10.2245	10.4235	10.3145	10.4445	10.448	10.195	10.3445	10.4125	10.616	10.44	10.5465	10.613	10.356	10.7355	10.5535	10.5185	10.454	10.6975	10.634	10.62	10.306	10.4415	10.2815	10.4845	10.688	10.461	10.5235	9.3095	10.3155	9.6995	10.1495	9.6675	10.027	9.492	10.394	9.558	9.0215	9.452
ARF3	8.01975	8.508	7.99925	7.92675	8.238	7.9215	8.0485	7.693	7.86325	8.03775	8.00725	7.96275	8.2225	7.86775	8.19175	8.1185	7.8225	8.03125	8.15	8.34025	8.23725	8.242	8.567	8.159	8.59425	8.468	8.33125	8.26975	8.53575	8.521	8.51975	7.908	8.12675	8.11825	8.317	8.58725	8.40075	8.12775	6.92125	7.7465	7.23425	7.586	7.1145	7.4625	6.915	8.04825	6.99375	6.5905	7.11675
ARF4	9.2805	9.463	9.4215	9.074	9.48	9.4255	9.337	9.2265	9.339	9.2095	9.3685	9.3155	9.083	9.561	9.263	9.2135	9.293	9.346	9.44	9.817	9.9035	9.888	10.088	10.258	9.8605	9.814	9.975	9.893	9.9015	9.9495	9.9515	9.6965	9.7035	9.749	9.92	10.0045	10.073	10.053	9.112	9.645	9.2945	9.4205	9.396	9.4835	9.109	9.5325	9.3845	9.375	9.517
ARF5	8.28325	8.4185	7.86275	8.339	8.1625	7.00875	7.87475	7.62675	8.32875	7.937	8.21175	7.86525	8.2595	7.88975	8.01225	8.15625	7.6855	8.141	8.212	6.87425	7.36975	6.89775	7.14025	6.7305	7.6265	7.2065	7.049	6.89225	7.44725	7.33125	7.09	7.14375	6.61525	6.911	6.9185	7.2495	7.26025	7.43175	6.59	7.59925	7.19025	7.16125	7.58575	7.444	7.42825	7.6195	6.88625	6.91125	7.1305
ARF6	10.3893	10.4517	10.4843	10.454	10.4303	10.6243	10.488	10.559	10.2497	10.4543	10.412	10.5567	10.3217	10.3407	10.4823	10.2817	10.4693	10.3457	10.647	10.5633	10.512	10.5533	10.6393	10.653	10.3907	10.52	10.509	10.669	10.4853	10.4187	10.6283	10.4647	10.6353	10.492	10.6733	10.524	10.5617	10.482	10.31	10.141	10.1067	10.2433	10.0253	10.2213	9.99667	10.1357	10.1047	10.0737	9.984
ARFGAP1	4.9632	4.6806	4.5094	4.7618	4.7066	4.2824	4.6812	4.3956	4.8896	4.6474	5.589	4.54	4.7572	4.524	4.6198	4.4564	4.5642	4.7558	4.948	4.9036	4.9042	4.7234	4.7378	4.7366	4.753	4.9352	4.83	4.774	5.0242	4.8486	4.9848	4.7954	4.8906	4.835	4.8892	4.8368	4.8012	4.7492	3.5948	3.9458	3.5388	3.8448	3.6044	3.8404	3.7014	4.0114	3.5192	3.445	3.4732
ARFGAP2	5.275	4.96775	5.113	5.2615	5.19825	4.80525	5.039	5.01975	5.1165	5.16225	5.1045	5.03025	5.39575	4.92775	5.25375	5.09025	5.154	4.8445	5.28625	5.17025	5.124	5.10575	5.18125	5.17025	5.28425	5.22975	5.285	5.19025	5.44175	5.22225	5.423	5.01025	5.26	5.131	5.36475	5.406	5.3815	5.12875	4.15075	4.6025	4.45175	4.677	4.56475	4.63525	4.24725	4.92725	4.36375	4.3235	4.273
ARFGAP3	5.8315	5.6035	5.471	5.267	6.011	5.9195	6.1565	5.57	5.4305	5.312	5.9595	5.7535	5.3485	5.9015	5.5525	5.727	5.603	5.6345	5.836	5.904	6.157	5.7425	6.151	5.9775	5.9505	5.826	6.0595	6.0805	5.7845	6.1195	6.1785	6.046	5.8755	5.9455	5.877	5.9405	6.023	6.125	5.453	5.5545	5.447	5.3605	5.2745	5.5095	4.7665	5.3045	5.0725	5.311	5.355
ARFGEF1	8.194	8.269	8.2065	7.9105	8.3625	8.2245	8.2765	8.416	7.935	8.033	8.2695	8.447	7.8945	8.4485	8.134	8.4535	8.435	8.055	8.329	8.5195	8.7765	8.654	8.7715	8.665	9.0355	8.6675	8.699	8.7545	8.604	8.561	8.6345	8.5425	8.968	8.6015	8.566	8.6915	8.776	8.4275	8.4975	8.49	8.356	8.4865	8.052	8.323	8.1005	8.347	8.225	8.4085	8.2735
ARFGEF2	4.9835	5.2645	5.391	5.144	5.4115	5.7725	5.5445	5.7035	4.9185	5.154	5.2925	5.862	4.7455	5.295	5.292	5.239	5.814	5.246	5.557	6.156	6.2535	6.216	6.1325	6.568	6.151	6.263	6.0635	6.253	6.088	5.9275	5.9905	6.2235	6.224	6.2795	6.0255	6.2035	5.9665	6.056	5.9715	5.5015	5.959	5.7235	5.7485	5.8005	5.821	5.2475	5.739	5.9575	5.9055
ARFIP1	6.334	7.10375	5.95375	5.84525	6.58775	6.1795	6.6175	6.4795	6.30775	6.226	6.60525	6.53075	6.6055	6.739	6.25075	6.43075	6.256	6.88275	6.3025	6.855	6.8655	6.77775	6.66875	6.66025	7.39975	6.73375	6.8885	6.67425	6.6995	7.39125	6.49925	6.97175	6.51125	6.64325	6.45725	7.08175	6.8705	6.73175	6.7055	6.6475	6.84775	6.60375	6.87675	6.8885	6.74825	6.34975	6.356	6.52525	7.0945
ARFIP2	4.99671	4.67929	4.75457	4.73114	4.62414	4.50714	4.69143	4.84686	4.94271	4.83829	4.72629	4.64614	4.92043	4.55671	4.79157	4.59471	4.62843	4.506	4.72857	4.73	4.57729	4.59643	4.61029	4.72329	4.57571	4.80357	4.73971	4.59557	4.84657	4.58871	4.679	4.636	4.76443	4.71486	4.78143	4.68671	4.74886	4.52829	4.11857	4.20571	4.39257	4.12329	4.28171	4.18186	4.40086	4.247	4.09414	4.06714	4.169
ARFRP1	3.87433	3.60033	3.69733	3.73167	3.57133	3.25667	3.64667	3.64067	3.95533	3.69367	3.61333	3.53767	4.06333	3.79133	3.68	3.698	3.58	3.46	3.77433	4.185	4.371	4.022	4.10367	4.06	4.102	4.171	4.18467	3.996	4.312	3.98167	4.021	4.03667	3.96933	3.95433	4.304	4.121	4.12133	4.085	3.099	3.379	3.13767	3.206	3.33567	3.37933	3.15933	3.38667	3.33267	2.95367	3.06233
ARG1	3.813	5.193	4.493	3.041	4.655	4.085	3.9	4.97	2.62	4.26	4.643	3.992	4.576	5.126	3.496	5.881	4.64	4.866	4.713	4.028	6.015	5.602	5.723	4.627	6.648	4.689	5.579	5.204	4.205	6.044	4.866	6.356	3.994	3.824	4.354	4.959	5.175	6.438	4.385	4.958	6.871	4.016	3.175	3.964	6.026	4.3	3.828	5.922	6.359
ARG2	5.879	5.752	5.9485	4.996	5.7905	5.5285	6.1065	5.5945	5.2835	6.4795	5.926	5.458	5.862	5.8915	6.0515	6.513	6.0235	6.469	5.5985	7.2635	6.3195	8.0245	6.0515	6.2435	6.709	6.396	6.2975	6.734	6.519	6.4115	6.205	7.195	6.332	6.516	5.7345	5.9895	5.962	6.174	5.689	6.044	6.076	5.8355	6.558	5.8255	6.5155	5.9525	6.141	5.9105	5.82
ARGFX	2.055	1.891	2.173	2.777	1.943	2.166	2.181	1.988	2.416	2.092	2.08	2.137	2.114	2.288	1.908	2.012	2	2.066	2.227	2.636	2.631	2.414	2.652	2.524	2.551	2.464	2.514	2.625	2.776	2.57	2.733	2.443	2.823	2.653	2.803	2.479	2.573	2.721	1.953	2.063	2.284	2.163	2.231	2.388	2.016	2.307	2.387	2.391	2.331
ARGLU1	6.4388	6.4566	6.1306	6.219	6.368	7.1044	6.7376	6.4184	6.0206	6.0708	6.2824	6.3516	6.1814	6.5568	6.1388	6.4112	6.2596	6.4256	6.2322	6.6394	6.904	6.7346	6.494	6.6008	6.7782	6.7132	6.864	6.8078	6.7536	6.8424	6.5752	6.9074	6.8872	6.7646	6.5046	6.8888	6.5788	6.6158	6.8244	6.2902	6.434	6.5252	6.4698	6.3212	6.7402	6.3126	6.353	6.5338	6.547
ARHGAP1	6.6005	6.631	6.301	6.4435	6.582	6.163	6.333	6.3705	6.4975	6.6585	6.355	6.191	6.549	6.133	6.56	6.4655	6.3765	6.295	6.4535	6.6095	6.425	6.2695	6.6155	6.497	6.602	6.743	6.4855	6.468	6.6545	6.598	6.7135	6.221	6.6795	6.3345	6.893	6.652	6.798	6.6575	5.3305	5.944	5.364	5.8165	5.341	5.805	5.1505	6.21	5.4075	5.1925	5.543
ARHGAP10	5.126	5.036	5.314	4.708	5.124	5.297	5.347	5.014	5.227	5.209	5.249	5.032	5.23	5.155	4.984	4.831	5.109	5.052	4.671	5.477	5.995	4.904	5.179	5.145	5.089	5.137	5.388	4.898	6.251	5.104	5.166	5.121	5.717	5.527	4.601	5.337	4.225	4.879	4.951	4.494	4.774	4.372	4.002	4.207	4.875	4.048	4.291	4.342	4.864
ARHGAP11A	2.165	2.2415	2.2135	2.39575	2.12775	2.694	2.2325	2.30125	2.2685	2.15	2.2715	2.22425	2.1555	2.13275	2.08725	2.11175	2.1255	2.199	2.20225	2.92725	3.01775	2.86625	2.92525	3.07625	2.87625	2.8515	3.025	2.9605	2.9085	3.047	2.90075	3.00575	3.035	2.84025	2.96575	2.89525	2.853	3.211	2.75075	2.385	2.51375	2.37	2.5525	2.38625	3.1045	2.32275	2.506	2.48375	2.66575
ARHGAP11A /// ARHGAP11B	3.163	3.73	3.302	3.433	3.753	3.565	3.617	3.44	3.305	3.287	3.482	3.124	3.679	3.562	3.91	3.692	2.932	3.958	3.157	3.508	3.728	3.519	3.598	4.002	3.629	3.921	4.14	3.925	4.429	4.273	3.859	3.978	4.417	3.276	3.665	3.724	3.48	4.137	2.73	3.441	3.55	3.373	3.217	3.511	3.401	3.154	3.011	3.156	3.233
ARHGAP12	4.7375	4.511	4.744	4.715	5.136	5.2575	5.44	5.252	4.9445	4.9015	4.937	5.6085	4.182	5.106	4.778	5.158	5.091	5.4395	5.0255	5.1585	5.444	5.156	4.958	5.134	5.009	4.7525	5.3265	5.263	4.9215	4.665	4.827	5.791	5.529	5.3135	5.238	5.57	4.974	5.3345	5.6495	4.6575	5.5935	4.998	5.68	5.0805	5.421	4.274	5.5235	5.8945	5.618
ARHGAP15	9.1325	9.283	9.0775	9.222	8.973	9.1975	9.317	8.9305	9.111	8.649	9.364	9.239	9.315	9.375	8.984	9.53	9.171	9.2885	8.989	9.2125	9.3645	8.9735	9.3815	8.792	9.6365	9.224	9.545	9.6615	9.3485	9.5665	9.181	9.381	9.4525	9.2985	9.3115	9.432	9.3255	9.46	8.6695	9.0295	9.3175	8.9825	8.775	9.392	9.069	8.9325	9.417	9.179	9.407
ARHGAP17	6.1746	6.2266	5.8728	6.3474	6.0324	5.7998	6.0056	6.0426	6.038	6.334	5.8718	6.0116	6.4204	5.7932	6.2834	6.0304	6.0656	6.0798	6.118	5.9006	6.0774	5.8886	6.0142	6.2472	6.3816	6.3066	6.2652	6.2374	6.1958	6.1348	6.1928	5.9236	6.3922	6.2302	6.0594	6.0466	5.9738	5.9138	5.0578	5.3956	4.9382	5.6728	5.0406	5.629	4.75	5.7944	4.8698	4.7392	4.9758
ARHGAP18	6.31967	6.33467	6.304	5.61167	6.174	5.675	6.81033	6.08233	5.663	6.80267	6.16233	6.33567	6.41933	6.26567	6.87833	6.531	6.16467	6.74367	6.25667	6.938	6.22133	7.13967	6.55267	6.27767	6.87333	6.75867	6.31633	6.71633	6.31667	6.51767	6.15767	6.56767	6.53067	6.63567	6.18567	5.86833	6.156	6.227	6.16367	6.50767	6.01133	5.977	6.104	6.06133	6.08933	6.11667	5.96	5.47567	5.80367
ARHGAP19	6.40233	6.67133	6.18233	6.52933	6.75667	6.47633	6.617	6.50267	6.59367	6.28233	6.94633	6.55233	6.39167	6.578	6.49533	6.607	6.42533	6.29267	6.857	6.77467	6.898	6.79867	6.89267	6.501	7.16633	6.59	7.23367	6.76533	6.758	6.918	7.099	6.64967	6.477	6.84333	6.97467	7.469	7.01733	6.92167	5.59867	7.013	6.29567	6.42533	6.353	6.40967	5.611	6.62467	5.994	6.32867	6.38733
ARHGAP20	2.504	2.3335	2.442	2.622	2.2655	2.635	2.2845	2.5455	2.3995	2.369	2.338	2.665	2.432	2.335	2.5005	2.2035	2.498	2.4045	2.4575	2.763	3.026	2.818	2.7565	2.969	2.9405	2.839	3.0365	3.0695	2.711	3.064	2.846	3.1725	2.9415	2.91	2.942	2.8625	3.109	2.8925	2.7545	2.4165	2.451	2.405	2.4355	2.501	2.856	2.678	2.792	2.7225	2.8725
ARHGAP21	4.36525	3.895	4.097	3.847	4.2555	4.11525	4.05575	3.72825	3.79	4.25125	3.828	4.0715	4.0295	3.991	4.049	4.1525	3.90725	3.829	4.06825	4.09525	4.21525	4.2195	4.3045	4.215	4.28175	4.31425	4.124	4.32975	4.08525	4.369	4.40425	4.15425	4.44225	4.237	4.206	3.86775	4.2045	4.127	3.75025	3.71625	3.3975	3.76475	3.901	3.637	3.85425	3.89025	3.87175	3.76575	3.44875
ARHGAP22	4.369	4.697	5.566	4.113	5.334	3.315	4.331	4.551	3.884	4.558	5.044	3.883	5.133	4.257	5.001	3.627	5.339	4.619	5.412	4.465	4.492	4.248	4.905	4.677	4.051	4.99	4.622	5.408	4.75	4.484	5.262	4.531	4.555	4.663	4.636	4.067	5.358	4.014	2.974	4.013	3.318	4.354	3.399	4.033	3.608	3.71	3.565	3.922	3.162
ARHGAP23	2.6605	2.7645	2.8385	2.703	2.4785	3.0345	2.648	2.735	2.2585	3.002	2.8675	2.6665	2.995	2.664	2.79	2.523	2.646	2.485	2.6145	3.5975	3.0325	3.6905	3.283	3.564	3.2555	3.2525	3.216	3.433	3.3265	3.8435	3.4905	3.179	3.3955	3.158	3.6345	3.0385	3.112	3.1575	2.635	2.281	2.363	2.309	2.235	2.48	2.2195	2.562	2.2645	2.755	2.3815
ARHGAP24	5.82467	5.65167	5.867	5.65733	5.64233	5.79767	5.34667	5.95533	5.101	5.78967	5.30067	5.64133	5.287	5.22333	5.22	5.457	5.67767	5.55133	5.836	5.70733	5.719	5.67267	6.39733	5.764	6.32333	5.668	6.48767	6.057	5.68167	5.74633	6.26233	5.67433	5.989	6.506	6.10633	4.96067	5.848	4.811	4.29633	5.13667	5.312	4.91	4.57	5.80533	4.13767	5.49633	4.80033	4.64067	5.30467
ARHGAP25	7.493	7.6628	6.4676	7.2042	7.31	6.843	7.2778	6.6702	7.3102	6.7736	7.265	7.0004	7.2362	7.0048	7.3116	7.5056	6.3676	7.256	7.0434	6.519	6.6944	6.5432	6.9236	6.2732	7.2502	6.8046	6.8718	6.6894	6.9776	7.1224	6.8634	6.5636	6.6622	6.6556	6.4762	7.0252	6.9462	6.777	5.8366	6.7204	6.4122	6.6942	6.2662	6.5082	5.8142	6.8774	5.8578	5.6952	6.1266
ARHGAP26	8.3555	8.78617	8.09867	8.201	8.69	8.5005	8.1985	8.09	8.53833	7.99817	8.74483	8.185	8.2265	8.67333	8.34933	8.587	7.65217	8.59733	8.46733	9.03183	8.91133	8.71417	9.17033	8.41183	9.183	8.58383	9.2035	8.6845	8.63067	9.04583	9.094	8.99133	8.3245	8.71067	8.591	8.82767	9.33367	9.08317	8.08917	8.7795	8.66917	8.27317	8.575	8.7065	8.26133	8.606	8.38917	8.558	8.44783
ARHGAP27	5.4426	5.3426	5.0198	5.1764	5.434	4.935	5.052	5.0086	5.174	5.0674	5.1374	4.964	5.2282	5.1564	5.1268	5.3454	4.929	5.1104	5.1904	5.462	5.5928	5.4226	5.554	5.442	5.9944	5.5398	5.585	5.4818	5.6564	5.8408	5.7434	5.5298	5.3716	5.4594	5.5058	5.683	5.6244	5.6342	4.642	4.969	4.9498	4.9082	5.082	4.882	4.9514	5.043	4.9012	4.8486	5.0022
ARHGAP28	2.25533	2.15733	2.082	2.30867	2.27033	2.29	2.15933	2.189	2.35267	2.04933	2.396	2.01867	2.17367	2.206	2.20867	2.20733	2.21367	2.12667	2.154	2.75233	2.67267	2.706	2.73533	2.81167	2.72267	2.76867	2.67767	2.8	2.59867	2.71733	2.731	2.74533	2.74967	2.666	2.709	2.69	2.85267	2.82667	2.37233	2.265	2.33733	2.301	2.33133	2.32	2.37933	2.144	2.27967	2.54067	2.30267
ARHGAP29	2.668	2.49083	2.86083	3.14217	2.49033	2.66033	2.55417	2.6975	2.80983	2.60583	2.22067	2.45017	2.4825	2.58183	2.4965	2.554	2.76483	2.6805	2.48183	3.08383	3.19083	3.43083	3.211	3.17583	3.28367	3.201	3.10667	3.12283	3.16617	3.21683	3.17433	3.4975	3.09983	3.25583	3.19967	3.053	3.14983	3.4305	2.798	2.6085	3.05883	2.6	2.80933	2.52683	2.88333	2.591	2.61183	2.781	2.90583
ARHGAP30	10.296	10.283	10.286	10.351	10.218	9.927	10.173	10.141	10.62	10.065	10.189	10.202	10.441	10.074	10.242	10.261	10.139	9.957	10.299	10.462	10.491	10.365	10.78	10.664	10.716	10.596	10.681	10.467	10.958	10.823	10.74	10.374	10.512	10.407	10.701	10.722	10.903	10.668	9.495	10.114	9.825	10.101	9.778	9.901	9.596	10.262	9.785	9.549	9.644
ARHGAP31	3.15333	3.091	3.34267	3.043	3.07267	2.97933	3.115	3.28	2.75633	3.15033	3.026	3.13767	3.177	3.026	3.04967	3.22433	3.27367	2.86367	2.90267	3.58133	3.70167	3.305	3.58033	3.44933	3.49967	3.71333	3.761	3.58867	3.462	3.79967	3.71233	3.41	3.565	3.39067	3.48333	3.625	3.516	3.33233	2.68533	3.109	3.303	3.04367	2.91967	3.12967	2.93167	3.299	2.81567	2.75367	2.84533
ARHGAP32	4.29967	4.14233	4.55767	4.709	4.43733	4.566	3.75333	4.49133	4.93767	4.76	4.41467	4.38633	4.35	4.385	4.25333	4.39867	4.474	4.20833	4.08733	5.09933	4.66867	4.67167	4.721	4.93067	4.79067	4.93433	4.75567	4.411	4.95367	4.56967	4.898	4.50533	5.005	5.03933	5.212	4.49867	4.895	4.69933	3.699	3.517	3.193	4.027	3.45867	3.83667	3.30667	3.81367	3.373	3.78333	3.77533
ARHGAP33	3.36075	3.24825	3.524	3.365	3.25775	3.21575	3.233	3.15175	3.476	3.38025	3.16625	3.11025	3.496	3.13875	3.4365	3.30575	3.34375	3.16925	3.01275	3.73175	3.5775	3.50875	3.61675	3.5525	3.5225	3.5475	3.5415	3.43575	3.7455	3.4405	3.9095	3.513	3.735	3.6125	3.7565	3.711	3.51525	3.778	2.36575	2.48975	2.55975	2.49075	2.4265	2.682	2.67275	2.83025	2.44225	2.3355	2.501
ARHGAP36	2.0215	1.8795	2.001	1.9855	1.9515	1.984	1.9165	2.086	1.9105	2.0895	1.9515	2.059	1.9565	1.9715	1.872	1.9455	1.985	2.0535	1.7215	2.8035	2.7765	2.908	2.9485	2.823	2.769	2.7365	2.7835	2.851	2.771	2.6905	2.8155	2.8215	2.7435	2.6355	2.8165	2.745	2.9625	2.845	2.4205	2.206	2.206	2.345	2.2305	2.171	2.2905	2.175	2.353	2.333	2.3475
ARHGAP39	2.2695	2.1065	2.332	2.211	2.0885	2.347	2.0675	2.3915	2.3745	2.307	2.2135	2.2985	2.301	2.169	2.4935	2.3345	2.505	2.1455	2.2275	2.9285	2.8655	3.03	3.023	2.8495	2.851	2.8865	3.0015	2.916	2.9415	2.8755	3.134	2.8075	3.0585	2.94	2.9935	2.9705	2.957	2.973	2.5525	2.392	2.237	2.466	2.5445	2.5955	2.329	2.562	2.389	2.2625	2.345
ARHGAP4	7.46375	7.41825	7.80275	7.5455	7.47475	8.22475	7.3715	7.618	7.93525	7.37475	7.52725	7.46875	7.85425	7.50175	7.4595	7.294	7.74125	7.2555	7.64275	8.28025	8.282	7.95525	8.154	8.29025	8.18875	8.38525	8.35625	7.966	8.66025	8.35475	8.314	8.24025	8.205	8.08825	8.44675	8.4065	8.13075	8.28625	6.93375	7.249	7.06575	7.11725	7.36175	7.09475	7.77	7.34475	7.18675	6.98725	7.16525
ARHGAP42	2.3465	2.496	2.526	2.679	2.5175	2.6215	2.3705	2.8795	2.526	2.4875	2.4455	2.617	2.503	2.4355	2.4315	2.6615	2.5925	2.457	2.436	3.004	3.2105	3.448	3.11	4.1705	3.0065	3.0975	3.1705	2.942	2.936	3.0645	3.171	3.1245	3.1485	3.118	3.056	3.0035	2.902	3.127	3.1085	2.333	2.8945	2.5925	2.645	2.911	2.429	2.3335	2.429	2.683	2.642
ARHGAP5	4.93243	4.19029	4.91729	4.01771	4.61543	5.03543	5.11057	5.61143	4.11243	4.30586	4.96429	5.25229	3.98243	5.25471	4.461	5.05586	5.345	5.24343	4.79014	5.54814	5.92071	5.76343	5.10514	5.70671	5.41957	5.57957	5.23114	5.99114	5.16357	5.12414	5.12429	5.94871	5.62843	6.10371	5.45343	5.49814	5.11457	5.28629	6.54829	4.98657	5.36786	5.34071	5.86443	5.70386	5.77514	4.82286	6.529	6.02671	6.142
ARHGAP6	3.16775	2.9375	3.0145	3.09825	2.96225	3.23625	2.9085	2.85	2.98	3.18475	2.96	2.94475	2.90675	3.10175	2.994	3.0875	2.93575	3.00875	3.173	3.49675	3.38975	3.69275	3.50575	3.35625	3.2615	3.43	3.09375	3.3975	3.4555	3.5905	3.2965	3.46225	3.451	3.7085	3.4	3.20925	3.4085	3.33225	2.99825	2.81475	2.65525	2.78175	3.02925	2.581	3.2215	2.852	2.76375	2.56425	2.56075
ARHGAP8	3.228	2.445	2.587	3.435	2.76	2.601	2.547	2.805	2.915	2.483	2.999	2.718	2.78	2.477	2.656	2.789	2.426	2.847	2.405	3.654	3.547	3.357	3.355	3.258	3.46	3.303	3.326	3.512	3.226	3.29	3.326	3.03	3.561	3.469	3.521	3.288	3.364	3.518	2.551	2.473	2.616	2.7	2.779	2.726	3.048	2.714	2.75	3.086	2.865
ARHGAP8 /// PRR5 /// PRR5-ARHGAP8	2.80767	3.003	3.25933	2.842	3.14567	3.142	2.96267	2.819	3.59967	3.284	3.543	2.825	3.334	2.61767	3.17133	2.895	2.79733	2.871	3.141	4.21767	3.229	3.91533	3.60367	3.634	3.27933	3.386	3.59333	3.46267	3.86467	3.396	3.39067	3.39233	4.346	3.75933	3.76733	3.18967	3.617	3.44333	2.57333	2.811	2.891	2.87133	2.96733	2.91933	2.70767	2.961	2.67733	2.66933	2.54333
ARHGAP9	6.67525	6.76275	6.10675	6.40625	6.64325	6.2545	6.617	6.3715	7.06775	6.07475	6.86475	6.393	6.635	6.55375	6.0945	6.663	6.1065	6.3815	6.71125	5.565	6.14575	5.86225	6.20825	5.51575	6.98725	6.2615	6.3235	5.93975	6.11375	6.422	6.5105	5.93725	5.647	5.9135	6.12125	6.526	6.24025	6.64275	4.75725	6.196	5.39225	5.6695	5.36975	5.56075	4.787	5.7605	5.06275	5.4375	5.76775
ARHGDIA	7.00075	6.904	7.1135	7.0965	6.7615	6.8315	6.73375	6.80725	7.00175	6.976	6.88825	6.61425	7.1535	6.509	6.96875	6.62175	6.772	6.4575	7.0065	6.881	6.8265	6.68025	6.84325	6.99	6.857	7.03325	6.76875	6.65725	7.2955	7.01725	6.8615	6.33325	6.8575	6.347	6.9225	6.8185	6.6105	6.6115	5.108	6.2155	5.375	6.10675	5.2725	5.72525	5.23825	6.43825	5.32525	4.646	5.054
ARHGDIB	12.1055	12.077	11.861	12.076	11.9815	11.915	11.954	11.8575	12.0665	11.847	12.0575	11.935	12.0235	11.975	11.9735	11.8995	11.863	11.9275	12.0535	12.2145	12.2015	12.112	12.243	12.167	12.247	12.0895	12.257	12.1305	12.18	12.218	12.2735	12.1035	12.1495	12.145	12.285	12.2025	12.308	12.3175	11.5885	11.8385	11.624	11.784	11.6515	11.7645	11.578	11.9015	11.7755	11.537	11.618
ARHGDIG	3.13	3.491	3.317	3.153	3.328	3.266	3.227	3.368	3.341	3.424	3.362	3.165	3.007	3.224	3.395	3.54	3.362	3.069	3.348	3.499	3.295	3.411	3.723	3.325	3.377	3.287	3.551	3.298	3.372	3.239	3.464	3.47	3.625	3.588	3.648	3.464	3.764	3.703	2.733	2.86	2.645	2.882	2.68	2.89	2.693	2.727	2.959	2.91	2.928
ARHGEF1	7.356	7.0115	7.1425	7.39	7.212	7.41475	6.9785	7.00475	7.86125	7.0785	7.15825	7.02375	7.37725	7.10425	7.07675	6.8995	7.002	6.86525	7.0815	7.12925	7.374	7.08	7.1225	7.16675	7.3705	7.4255	7.33075	6.8715	7.5675	7.29875	7.40275	7.2125	7.3125	7.1005	7.47025	7.5635	7.20475	7.56	5.85975	6.515	6.41875	6.36025	6.4655	6.29625	6.57775	6.75575	6.31975	5.9015	6.0265
ARHGEF10	3.638	3.36033	3.82433	4.02267	3.52367	4.51533	3.52733	3.66733	3.887	3.35433	3.84367	3.587	3.336	3.20867	3.85467	3.73	3.506	3.369	3.99167	3.859	3.94	3.518	3.91067	3.69967	3.54233	5.19067	3.29233	3.698	3.514	3.60933	4.035	3.97333	4.37267	4.187	3.80433	3.36033	3.732	3.641	3.26967	3.34533	3.16833	3.43567	6.317	3.50633	3.411	3.22967	3.83833	3.23867	3.084
ARHGEF10L	3.83933	3.7745	3.672	3.69317	3.697	3.61917	3.4665	3.6225	3.74783	3.7915	3.653	3.5645	3.8025	3.40017	3.5305	3.418	3.676	3.506	3.55467	4.48467	4.30467	4.25733	4.17733	4.29367	4.3265	4.14333	4.29317	4.00917	4.479	4.476	4.37167	4.11683	4.04883	4.13767	4.4175	4.15767	4.14333	4.15983	2.8755	3.12	2.992	3.24483	3.0955	3.18083	2.93267	3.71583	2.96133	3.00967	3.02067
ARHGEF11	5.23933	5.16733	4.921	5.094	5.15233	4.62733	4.882	4.88433	5.37667	5.21333	5.55767	4.962	5.153	5.39033	5.02767	5.1	4.935	5.08433	5.32767	5.07833	5.12567	4.866	5.11267	4.78333	5.48633	5.06433	5.30767	4.77767	5.385	5.394	5.112	4.81967	4.87567	4.91567	5.11133	5.206	5.23267	4.99267	4.144	4.59733	4.22033	4.43833	4.49367	4.573	3.998	4.73233	4.13967	3.97267	4.12367
ARHGEF12	4.7006	4.5816	5.345	4.8066	4.7088	4.933	4.8762	4.4724	4.962	6.0086	4.9166	4.421	4.728	4.9908	5.1644	5.4166	4.6618	4.8876	4.743	5.707	4.6094	6.262	4.7978	5.4288	5.2402	5.2968	4.8066	5.7838	4.6372	5.5498	4.7426	5.6684	5.3586	5.06	4.9274	4.5498	5.0554	4.6796	4.0372	4.452	4.3612	4.9356	4.086	4.4432	4.2996	4.6472	4.6022	4.146	3.9386
ARHGEF15	2.824	2.62	2.8875	2.854	2.6305	2.708	2.7655	2.766	3.0105	2.7745	2.692	2.689	2.7395	2.514	2.648	2.6805	2.584	2.507	2.947	2.9655	3.007	2.9705	3.1085	3.0835	3.189	3.1015	3.037	3.064	3.215	3.4185	3.1275	3.2	3.0685	3.0365	3.059	3.1255	3.214	3.072	2.5515	2.7405	2.727	2.7215	2.661	2.6815	2.7275	2.8575	2.7645	2.6325	2.561
ARHGEF16	2.606	2.344	2.40667	2.48367	2.43367	2.37667	2.44033	2.49367	2.36567	2.56067	2.60233	2.376	2.59867	2.40567	2.44933	2.44767	2.321	2.27533	2.52867	3.02733	2.97633	2.903	2.93767	2.94733	2.908	3.028	3.081	2.93	2.98367	3.10333	3.03733	2.93167	2.968	2.894	3.04367	3.058	3.10633	2.94133	2.111	2.30633	2.10533	2.25333	2.25867	2.28033	2.209	2.35167	2.28867	2.192	2.24867
ARHGEF17	3.869	3.92	3.226	3.409	4.384	3.861	3.058	2.991	3.312	3.154	3.305	3.465	3.371	3.032	3.293	3.484	3.006	3.473	3.457	3.647	3.69	3.49	3.732	3.907	3.558	3.586	3.511	3.766	4.29	3.97	3.558	3.933	3.542	3.57	3.736	3.654	3.591	4.604	3.362	3.949	3.151	3.25	3.357	3.197	3.208	3.43	3.248	3.31	3.374
ARHGEF18	10.507	10.605	10.54	10.626	10.551	10.338	10.557	10.52	10.509	10.494	10.447	10.66	10.736	10.295	10.614	10.581	10.624	10.438	10.657	11.031	11.24	11.031	11.158	11.185	11.17	11.178	11.301	11.081	11.338	11.094	11.292	10.823	11.275	11.169	11.24	11.34	11.142	10.886	10.479	10.511	10.125	10.689	10.138	10.628	10.399	10.715	10.282	9.831	10.255
ARHGEF19	4.549	4.252	4.653	4.477	4.475	4.444	4.295	4.477	4.505	4.587	4.099	4.456	4.426	4.099	4.516	4.5	4.687	4.395	4.144	5.343	5.929	5.611	5.229	5.481	5.047	5.262	5.334	5.473	5.522	5.268	5.46	5.47	5.436	5.153	5.357	5.434	4.927	5.527	4.655	4.364	4.067	4.004	4.296	3.857	4.424	4.393	3.872	4.431	4.45
ARHGEF2	5.83433	5.831	5.76533	5.65767	6.063	5.34833	5.69533	5.66233	5.95533	5.81833	5.613	5.77867	5.658	5.85667	5.72233	5.62133	5.60233	5.55533	5.843	6.00167	5.99	5.87267	6.025	5.913	6.07867	5.976	6.04667	5.85067	6.00067	6.08433	6.03367	5.85067	5.95167	5.85833	6.08167	6.007	6.255	6.103	5.06633	5.49733	5.45933	5.40667	5.33433	5.412	5.26967	5.58767	5.34	5.259	5.225
ARHGEF3	7.65475	7.5245	7.0365	7.602	7.677	6.73825	7.85925	7.3825	7.199	7.64125	7.3455	7.60425	7.56875	7.1245	7.84825	7.61325	7.53425	7.484	7.5455	7.63875	7.632	7.56075	7.48825	7.60875	7.279	7.5765	7.6845	7.4965	7.41875	6.9365	7.31975	6.96875	8.11325	7.5065	7.51525	7.477	7.204	7.031	7.1845	6.9455	7.36275	7.54025	7.13975	7.49525	6.987	7.267	6.88425	7.32125	6.9205
ARHGEF33	2.073	1.947	1.919	1.819	1.778	2.15	1.927	1.977	1.883	2.073	1.844	1.833	1.974	2.052	2.015	3.649	1.72	1.867	1.992	2.623	2.749	2.668	2.418	2.705	2.469	2.932	2.696	2.663	2.464	2.599	2.761	2.826	2.834	2.651	2.583	2.857	2.735	2.617	2.864	2.502	2.498	2.327	2.634	2.5	2.595	2.335	2.233	2.467	2.628
ARHGEF35 /// ARHGEF5	3.254	2.682	2.635	2.587	2.888	2.877	2.89	2.99	2.756	3.435	2.541	2.829	3.267	2.648	2.984	2.674	2.654	2.821	2.927	3.307	3.227	3.177	3.24	3.319	3.415	3.086	3.35	3.355	3.277	3.291	3.154	3.376	3.507	3.372	3.421	3.293	3.384	3.451	2.75	2.703	2.567	2.625	2.674	2.389	2.904	2.511	2.755	2.676	2.971
ARHGEF37	2.94767	2.95867	3.06233	3.035	2.83967	3.082	2.88233	2.93033	2.84967	3.01467	3.037	2.78433	3.04233	2.97367	2.95967	2.97267	2.918	3.179	3.215	3.40867	3.28667	3.581	3.30433	3.28633	3.23533	3.26067	3.34967	3.40033	3.147	3.40167	3.24567	3.307	3.36433	3.25767	3.35567	3.32733	3.53933	3.46733	2.44433	2.66867	2.56967	2.57967	2.54167	2.666	2.80567	2.57333	2.865	2.605	2.61267
ARHGEF38	2.082	1.882	2.13	1.905	1.901	2.18	2.003	2.11	2.071	1.859	1.836	1.826	1.902	1.961	1.742	1.855	1.796	2.06	2.053	2.682	2.713	2.471	2.675	2.507	2.658	2.562	2.621	2.552	2.452	2.563	2.596	2.616	2.533	2.585	2.507	2.508	2.633	2.754	2.427	2.267	2.128	2.121	2.196	2.27	2.167	2.646	2.252	2.508	2.191
ARHGEF4	2.909	2.86375	2.7815	2.97925	2.91825	3.07325	2.831	2.99625	3.0725	3.0045	2.82175	2.909	2.84725	2.88625	2.9475	2.829	2.98875	2.714	2.71475	3.54525	3.52975	3.33725	3.56775	3.33175	3.4705	3.43125	3.422	3.52975	3.57325	3.51625	3.31475	3.422	3.4835	3.372	3.43675	3.5035	3.563	3.566	2.704	2.743	2.60125	2.6165	2.801	2.7865	2.81725	2.93175	2.59175	2.63625	2.76375
ARHGEF5	3.853	3.709	4.037	4.693	3.64	4.541	4.045	4.746	4.555	4.281	3.677	4.411	4.395	3.668	3.896	3.877	4.726	3.775	3.957	4.124	4.264	4.183	4.419	4.705	4.344	4.2	4.332	4.537	4.332	4	4.364	4.665	4.555	4.389	4.465	4.351	4.419	4.021	3.459	3.185	3.231	3.171	4.307	3.276	4.015	3.41	3.53	3.106	3.683
ARHGEF6	6.61633	6.781	6.38567	6.79467	6.621	6.517	6.94133	6.34433	6.26733	6.65533	6.33	6.65467	6.737	6.61067	7.052	6.689	6.54967	6.53467	6.542	6.73033	6.745	6.83967	6.78267	6.44833	6.932	6.69433	6.48067	7.09167	7.00867	6.808	6.731	6.69433	6.55733	6.75033	6.62333	6.73233	6.65167	6.891	6.21333	6.18567	6.19667	6.54967	6.07433	6.24067	6.161	6.48	6.285	6.37333	6.04133
ARHGEF7	5.012	4.932	4.735	4.92114	4.88243	5.05086	5.06757	4.89314	4.92357	5.015	4.84986	5.03286	4.93757	4.99614	5.14243	4.81443	4.865	4.92157	4.77371	5.19986	5.03414	5.28829	5.21414	5.26943	5.30814	5.42086	5.28157	5.43671	5.37386	5.14271	5.349	4.97829	5.43314	5.20229	5.36729	5.27429	5.42671	5.347	4.192	4.50757	4.40214	4.76071	4.40643	4.665	4.248	4.78986	4.35629	4.39529	4.53457
ARHGEF9	5.58467	5.33967	5.57033	5.209	5.53933	5.814	5.52933	5.495	5.511	5.67533	5.43033	5.879	5.42567	5.23333	5.87433	5.53233	5.76767	5.101	5.64767	5.93567	6.208	5.439	5.908	6.19667	5.596	6.10033	5.96733	6.07933	6.10133	5.723	5.96633	5.847	6.77933	6.121	6.47867	6.057	5.94067	5.65967	5.18467	4.93633	5.26267	5.355	5.188	5.39667	5.62967	5.475	4.948	5.30233	5.02967
ARID1A	5.813	5.76133	5.62883	5.94117	5.79533	5.2005	5.6	5.602	5.8075	5.62783	5.68833	5.691	5.84817	5.39017	5.84383	5.73617	5.61967	5.5615	5.79217	5.48183	5.47483	5.36683	5.86817	5.60683	5.94183	5.7165	5.6575	5.58317	5.90317	5.8675	5.8935	5.08983	5.61633	5.32417	5.61567	5.72483	5.76317	5.521	4.70317	5.1315	4.72517	5.18233	4.946	5.04667	4.52283	5.57067	4.54533	4.46967	4.5795
ARID1B	7.7505	7.758	7.613	7.5265	7.3385	7.3585	7.4045	7.6615	7.5865	7.6915	7.4605	7.742	7.4495	7.356	7.719	7.69	7.649	7.303	7.4535	7.864	8.0035	7.9985	8.046	8.214	7.883	8.0805	7.681	8.058	8.134	7.8695	8.073	7.828	8.0435	7.8645	8.264	7.819	8.254	7.5825	7.5305	7.169	6.8595	7.319	6.751	7.312	7.04	7.3925	7.0915	7.062	7.21
ARID2	7.45233	7.39667	7.49767	7.05567	7.475	7.29233	7.51233	7.50833	7.17733	7.45567	7.38767	7.52767	7.055	7.42933	7.361	7.29367	7.54267	7.52133	7.32667	8.132	8.28667	8.01233	8.22067	8.39767	8.223	8.22	8.15033	8.32567	8.117	8.11333	8.219	8.09333	8.21633	8.222	8.18133	8.14967	7.987	8.14933	8.02833	7.50067	7.578	7.69167	7.74667	7.82733	7.85067	7.6	7.829	7.72367	7.59
ARID3A	6.904	6.937	6.124	6.443	6.656	5.899	6.748	6.215	6.974	6.298	6.875	6.223	6.979	6.628	6.866	6.661	5.904	6.407	6.289	6.908	6.611	6.425	7.231	6.785	7.216	6.831	7.214	6.788	7.31	7.224	7.314	6.484	6.311	6.629	6.874	7.346	7.117	7.177	5.143	6.446	5.931	6.051	5.794	6.124	5.642	6.701	5.139	5.515	5.964
ARID3B	5.76867	5.82167	5.87333	5.918	6.11167	6.448	5.84133	5.70433	5.98433	5.84	6.11567	5.85267	5.808	5.80933	5.78033	5.68833	5.624	5.535	6.149	6.454	6.45367	6.26367	6.585	6.36367	6.56167	6.29333	6.465	6.38033	6.49733	6.53133	6.58967	6.198	6.35133	6.25467	6.51533	6.664	6.53067	6.37933	5.033	5.64067	5.05067	5.23167	5.282	5.38467	5.24133	5.668	5.16467	4.85967	5.14433
ARID3C	2.28	2.181	2.375	2.08	2.298	2.252	2.247	2.144	2.09	2.268	2.275	2.298	2.042	2.463	2.262	2.079	2.319	2.296	2.253	2.873	3.186	2.925	2.95	2.979	3.08	2.93	2.683	2.89	2.929	2.817	3.043	2.923	2.921	2.924	3.038	3.031	2.939	2.953	2.404	2.488	2.493	2.468	2.273	2.56	2.297	2.618	2.356	2.507	2.405
ARID4A	7.9868	8.0376	8.02	7.4602	8.3308	8.4152	8.3156	8.0028	7.7644	7.5474	8.2626	8.3182	7.5492	8.3902	7.6836	8.2434	7.9228	8.3204	8.0642	8.6802	8.8338	8.717	8.5614	8.499	8.7228	8.5782	8.6444	8.848	8.2566	8.6074	8.5322	9.0176	8.4186	8.762	8.5594	8.6358	8.558	8.9292	9.2784	8.719	9.068	8.5238	9.146	8.752	9.1288	8.1006	9.016	9.2048	9.1498
ARID4B	5.8988	6.0662	5.45	5.6798	6.2568	5.7402	6.2578	5.887	5.6632	5.542	6.0332	6.1788	5.6784	6.216	5.7986	6.0402	5.9972	6.0748	5.56	6.2812	6.191	6.4488	6.1476	6.114	6.431	6.4866	6.3724	6.5032	6.0616	6.4718	6.0708	6.4326	6.3602	6.2688	5.9276	6.5344	6.259	6.2306	6.1664	5.9178	6.3414	6.1798	6.0184	6.0894	5.8786	5.5888	5.8992	6.3896	6.538
ARID5A	5.443	5.658	5.591	5.5285	5.308	5.888	5.624	5.3245	5.714	5.4565	5.685	5.2715	5.7095	5.647	5.4205	5.54	5.379	5.3795	5.6935	5.8405	5.9125	5.497	6.144	5.7155	5.9275	5.8465	5.9915	5.7155	6.0765	6.2135	5.862	5.7995	5.757	5.6495	5.986	5.9505	6.133	6.1095	5.012	5.2915	5.2145	4.922	5.1065	5.009	5.278	5.2175	5.1695	4.9725	4.749
ARID5A /// LOC100132284	2.178	2.24	1.975	2.069	1.801	2.301	2.02	2.282	2.127	2.393	2.049	1.803	2.042	1.939	2.17	1.982	1.776	2.029	2.153	2.772	2.717	2.627	2.54	2.473	2.751	2.593	2.709	2.67	2.57	2.81	2.707	2.696	2.493	2.57	2.618	2.689	2.689	2.696	2.144	2.311	2.055	2.299	2.296	2.091	2.086	2.422	2.121	1.922	2.099
ARID5B	7.546	6.82033	7.09033	7.19533	6.83967	7.74233	7.47233	7.467	6.92	7.57267	6.84267	7.14633	7.281	7.02867	7.497	7.31667	7.71667	7.041	7.04467	7.266	7.253	7.229	7.03067	7.56467	7.34933	7.14967	7.378	7.40233	7.18133	6.92433	7.351	6.99933	7.85267	7.328	7.61067	7.36733	7.523	6.79033	7.292	6.76033	6.94333	6.68433	6.35433	7.20733	6.91	6.59633	7.219	6.43467	6.63433
ARIH1	7.076	7.254	6.9985	7.0425	7.1265	7.7405	7.238	7.069	6.923	7.035	7.196	7.2015	6.9785	7.12	7.201	7.2855	7.194	7.229	7.0405	7.698	7.3705	7.38	7.5765	7.272	7.5825	7.4785	7.4835	7.678	7.424	7.451	7.432	7.368	7.073	7.569	7.434	7.527	7.5355	7.312	6.8635	7.152	7.0905	7.0745	6.8075	7.0415	6.7195	7.0155	6.961	7.2485	6.8895
ARIH1 /// MIR630	2.309	2.554	2.466	2.389	2.711	3.069	3.138	2.789	2.395	3.016	2.534	3.324	2.891	2.649	2.293	2.429	3.221	4.114	3.393	3.576	3.296	3.909	4.049	3.605	3.677	3.541	3.282	3.759	3.482	3.887	3.534	4.099	3.319	3.996	2.993	3.59	3.206	3.839	3.563	3.073	3.553	2.889	3.225	2.684	4.046	3.376	3.368	3.021	3.561
ARIH2	7.63933	7.58167	7.34033	7.60533	7.633	7.198	7.61333	7.45033	7.61767	7.72133	7.35	7.51533	7.655	7.452	7.612	7.48233	7.46133	7.387	7.44267	7.42667	7.45233	7.36333	7.518	7.50767	7.52667	7.625	7.486	7.464	7.69867	7.35233	7.52567	7.11967	7.671	7.368	7.65	7.79367	7.429	7.48533	6.117	7.01767	7.208	7.404	6.93367	7.154	7.19867	7.26233	6.936	6.68167	6.60633
ARL1	5.08375	5.04725	5.46988	4.73888	5.3245	5.05475	5.49538	5.77238	4.78725	5.45212	5.26537	5.68063	5.06438	5.08087	5.40775	5.02013	6.01138	5.31825	5.006	5.73412	6.3705	6.56112	5.956	6.66475	5.70375	5.996	5.67537	6.16237	5.64675	5.92438	5.86913	6.86175	5.95775	6.42	6.24875	5.66387	5.29788	6.16975	7.47238	5.21	6.29962	5.38788	6.37175	5.45712	6.38775	4.76875	6.05975	6.9655	6.84075
ARL10	2.7555	2.7445	2.651	3.476	2.6065	2.6675	2.874	2.6475	3.045	2.8355	2.974	2.841	2.8035	2.9605	3.039	2.809	2.6535	3.579	2.899	3.2555	3.364	3.3675	3.334	3.353	3.3295	3.418	3.541	3.4885	3.4055	3.248	3.401	3.232	3.637	3.274	3.417	3.474	3.3035	3.4485	2.646	2.7945	2.6065	2.4735	2.5825	2.552	2.8785	2.4135	2.886	2.951	2.9545
ARL11	6.3125	6.163	4.841	5.3305	5.7015	3.3335	5.805	5.315	5.5925	5.1265	5.7515	5.396	5.792	5.9535	5.7455	6.485	4.97	6.1925	5.2035	5.395	5.7345	5.394	5.846	4.533	7.0465	5.5705	6.13	5.4095	6.049	6.237	5.718	5.48	5.311	5.5885	4.881	6.092	5.9195	5.605	4.1285	5.4645	5.3745	5.4275	5.5345	5.142	4.769	5.7745	4.846	4.802	5.4855
ARL13A	1.976	2.088	2.2045	2.744	2.115	2.125	2.151	2.0635	2.1865	2.199	2.1885	1.987	2.0995	2.0635	2.307	1.991	2.0515	1.945	1.946	2.605	2.693	2.7005	2.6945	2.6615	2.797	2.994	2.759	2.901	2.644	2.5865	2.707	2.899	2.861	2.766	2.698	2.634	2.7285	2.722	2.492	2.203	2.3745	2.2905	2.3025	2.3745	2.2925	2.606	2.355	2.441	2.3075
ARL13B	3.127	3.161	3.38633	2.96333	3.32567	3.35333	3.54867	3.731	3.13767	3.15233	3.292	3.55267	2.83133	3.681	2.93067	3.38767	3.76	3.635	3.32467	4.021	3.872	4.22967	3.87867	4.02467	4.021	3.93833	3.99933	4.46867	3.466	4.07567	3.71467	4.225	3.89567	4.25533	3.78733	3.95267	3.74533	3.66767	4.61467	3.29367	4.30033	3.712	4.29033	4.07767	4.326	3.23	3.84233	4.46367	4.33033
ARL14	2.031	2.126	2.095	2.125	2.186	2.135	2.361	2.034	1.932	2.244	2.266	2.1	2.016	2.277	2.139	2.363	2.124	2.221	2.561	2.74	2.902	2.68	3.028	2.795	3.097	2.818	2.921	3.058	2.981	2.76	2.96	3.026	2.843	2.66	2.92	2.738	2.857	2.756	2.546	2.349	2.639	2.308	2.616	2.454	2.592	2.527	2.478	2.674	2.562
ARL15	4.7355	5.1035	4.7835	5.2195	5.337	4.646	5.4565	5.3695	4.589	4.9375	4.962	5.646	4.678	5.5105	5.171	5.4235	5.0185	5.2545	4.9155	5.1365	5.323	5.65	5.6305	5.4535	5.6085	5.5885	4.9865	5.453	4.983	5.36	5.0475	6.264	4.984	5.3835	5.167	5.3635	5.3375	5.5725	5.211	5.1925	5.287	5.164	5.353	5.2585	5.1885	5.1225	5.1705	5.379	5.0745
ARL16	4.4505	4.3565	4.399	4.2435	4.463	4.2095	4.299	4.49	4.2035	3.6405	4.3315	4.3385	4.015	4.328	4.526	4.005	4.27	4.3615	3.877	4.8525	4.8435	5.018	4.5355	4.979	4.4465	4.887	4.877	4.55	4.591	4.579	4.977	5.0735	4.388	4.9625	4.661	5.0475	4.985	5.0055	4.286	4.0605	4.578	4.27	4.5625	4.4915	4.502	3.7855	4.4865	4.7085	4.456
ARL17A	6.6865	5.62275	6.4885	6.185	5.86925	6.3945	6.2025	6.24675	6.542	5.5895	5.38075	5.96425	5.79175	5.75125	6.38275	6.64325	6.0385	5.95775	5.71825	6.9475	7.1385	7.0755	6.54425	6.473	6.25625	6.8505	7.35925	6.279	6.57525	6.70475	6.9645	6.793	6.7945	7.05175	7.10025	7.16225	6.34375	7.632	5.3545	5.35675	5.583	5.664	6.18975	6.421	6.0655	6.04525	6.234	6.106	5.76975
ARL17A /// ARL17B /// LOC100294341	3.729	3.546	4.101	4.3165	4.008	3.795	3.925	4.0095	3.562	3.385	3.4075	3.687	3.494	3.6545	4.116	3.802	3.401	3.437	3.424	3.859	4.4365	4.241	3.738	4.3555	4.231	4.0605	4.0815	4.063	4.4495	4.275	4.1645	4.571	4.344	4.5325	4.1065	4.3835	4.132	4.189	3.14	2.9135	3.3685	3.4435	3.6165	3.0055	3.6425	3.629	3.6225	4.4965	3.694
ARL17A /// LOC100294341	6.664	3.999	5.932	5.74	5.276	4.966	5.094	5.651	6.714	4.694	4.494	4.561	4.719	4.96	6.308	6.848	5.333	6.291	4.815	5.574	8.128	7.158	7.153	6.188	5.682	7.221	8.368	6.039	5.976	6.908	7.458	7.463	6.019	5.893	7.284	7.608	5.202	7.773	4.205	4.328	4.123	5.229	4.538	6.627	4.629	5.308	7.109	5.217	5.274
ARL17A /// LOC100294341 /// LOC646043	4.169	3.558	3.472	3.68	3.568	3.47	3.569	3.12	3.605	3.527	3.307	3.419	3.44	2.929	3.514	3.361	3.477	3.258	3.373	3.746	3.623	3.817	3.61	3.735	3.727	3.732	3.623	3.677	3.776	3.977	3.838	3.559	3.768	3.812	3.713	3.846	3.846	3.823	2.783	2.982	3.079	2.784	2.656	2.852	3.09	2.915	3.022	2.666	2.718
ARL2	4.7605	4.55	4.5765	4.489	4.2915	4.238	4.363	4.4355	4.653	4.739	4.281	4.3445	4.6385	4.1385	4.534	4.44	4.5865	4.432	4.597	4.7905	4.6465	4.6615	4.559	4.6895	4.4355	4.32	4.5895	4.6315	4.9865	4.58	4.514	4.6235	4.8125	4.586	4.7745	4.537	4.617	4.6455	4.0185	3.976	4.025	3.8545	4.039	4.0845	4.176	4.2695	3.99	3.828	3.9155
ARL2 /// SNX15	5.555	4.802	4.849	5.23	4.725	3.791	5.124	5.006	5.415	5.582	5.113	5.043	5.175	4.609	5.073	4.982	5.034	4.59	4.915	4.725	4.629	4.403	4.833	5.108	4.709	4.556	4.533	4.94	5.016	4.705	4.532	4.906	4.787	4.676	4.928	4.984	5.122	4.108	3.449	4.399	3.681	3.884	4.016	3.927	3.836	4.654	3.46	3.34	3.431
ARL2BP	6.32275	5.978	6.21	6.05925	6.068	6.01275	6.1015	6.1995	5.9695	6.0165	6.15775	6.248	6.01975	6.03125	6.0745	6.1575	6.2125	5.9045	5.9825	6.35925	6.40325	6.34225	6.327	6.603	6.3775	6.46125	6.32025	6.48925	6.5395	6.2945	6.388	6.09025	6.34575	6.3545	6.45725	6.5625	6.2905	6.1605	6.07275	5.9855	5.87875	6.102	5.866	6.05325	5.89325	6.4095	5.93175	6.02475	5.95275
ARL3	4.25433	4.37733	4.08867	4.11	4.17167	4.252	4.20867	4.26267	4.42	4.10733	4.48333	4.06733	4.61233	4.524	4.20233	4.146	3.88367	4.40033	4.49833	4.60233	4.90633	4.377	4.42633	4.604	4.803	4.58833	4.827	4.42733	4.79833	4.63533	4.526	5.03733	4.78033	4.608	4.47233	4.40333	4.74033	4.74633	4.63333	4.49533	4.22067	4.146	4.34433	4.39167	4.66067	4.372	4.29367	4.56733	4.364
ARL4A	5.20175	5.005	5.4805	5.15325	5.2305	6.6075	5.35075	5.66925	4.837	5.86725	5.48425	5.32125	5.629	5.4595	5.4895	5.53675	5.40575	5.9905	5.119	6.02125	5.8315	7.27525	5.70375	5.808	6.1485	6.0255	5.975	6.393	5.76225	5.9895	5.5755	6.79625	5.71225	6.08875	5.84175	5.637	5.59	5.77925	6.13425	5.28325	6.00275	5.73725	6.01125	5.9255	5.49075	5.353	5.848	5.4215	5.8005
ARL4C	7.115	6.96433	6.984	6.848	7.02833	6.99733	7.18033	7.14767	6.87633	7.08467	6.89033	7.028	7.03567	6.81833	7.10633	6.86133	7.09733	6.665	6.92233	7.49	7.46333	7.31467	7.385	7.45433	7.02467	7.31	7.26867	7.19133	7.476	7.182	7.37133	7.09067	7.78533	7.18567	7.409	7.39667	7.295	7.01733	6.92367	6.60867	6.851	6.921	6.629	6.801	6.94	6.86567	6.78333	6.785	6.61933
ARL4D	3.684	3.8235	3.886	3.5355	3.373	4.147	3.8105	3.781	3.5975	3.7175	4.076	4.152	3.683	3.705	3.5545	3.9065	3.834	4.2155	3.8505	4.0365	4.304	4.0805	4.2365	4.381	4.2985	4.3165	4.554	4.722	4.1635	4.0605	4.0585	4.672	4.5845	4.6905	4.5905	4.0175	4.279	4.1645	5.1695	3.2595	3.3365	3.843	3.477	3.703	4.2815	3.3185	3.7395	3.972	3.815
ARL5A	6.422	6.5504	6.5848	5.7182	6.2862	6.087	6.601	6.7304	6.0484	6.1244	6.2406	6.7146	6.2144	6.676	6.2018	6.6698	6.8062	6.8342	6.3956	7.3072	7.5304	7.4886	7.1316	7.355	7.2316	7.1642	7.0808	7.1584	7.0022	7.0908	7.1078	7.4684	7.4304	7.4084	7.0326	7.1062	6.8628	7.2614	7.4678	6.9418	7.3742	6.9548	7.2246	7.2232	7.6638	6.5994	7.2642	7.446	7.4862
ARL5B	3.703	4.40533	3.64167	3.34467	4.1	4.45433	4.115	4.14133	3.10133	3.911	4.033	3.79233	3.30167	4.478	3.60467	3.95467	3.828	4.60933	4.11867	4.71533	4.771	5.02533	4.878	5.04567	4.788	4.49067	4.463	5.09767	4.23467	4.505	4.65433	5.45233	4.48467	4.79267	4.627	4.95433	4.56633	4.54833	4.83267	4.52733	4.92433	4.45267	4.63933	4.63267	4.17267	3.973	4.33133	5.30767	5.09233
ARL5C	2.589	2.7435	2.538	2.863	2.7185	2.4695	2.476	2.742	2.6875	2.6885	2.389	2.626	2.5745	2.525	2.599	2.5965	2.615	2.4355	2.66	3.435	3.277	3.4255	3.3755	3.22	3.2445	3.1935	3.209	3.359	3.2515	3.4155	3.3805	3.3705	3.328	3.133	3.2895	3.2755	3.49	3.486	2.398	2.6165	2.567	2.352	2.479	2.5305	2.7185	2.523	2.5355	2.47	2.426
ARL6	2.49975	2.7645	2.936	2.2905	2.75325	2.68025	2.89175	3.327	2.5485	2.457	2.8225	3.1775	2.55125	3.01325	2.901	2.73225	3.41025	2.89125	3.10825	3.51775	3.53425	3.56725	3.34375	3.54275	3.18725	3.3785	3.379	3.581	3.66175	3.3965	3.1535	3.92275	3.724	3.86525	3.22	3.3825	3.55325	3.341	4.4045	3.14	3.563	3.09975	3.24425	3.194	3.68525	2.81	3.46825	3.929	3.91475
ARL6IP1	7.436	7.49433	7.46233	7.377	7.62867	7.65867	7.79167	7.87767	7.29367	7.634	7.46133	7.929	7.13967	7.61067	7.52533	7.557	7.688	7.534	7.61033	7.721	7.72633	8.16433	7.98	8.11767	8.01033	7.77033	7.601	8.05233	7.5	7.67533	7.81067	7.964	7.78133	7.76333	8.09167	7.951	7.89367	7.738	7.5	7.574	7.59467	7.868	7.584	7.51633	7.40133	7.30833	7.73667	7.83967	7.89367
ARL6IP4	6.8595	6.299	6.75025	6.78787	6.37437	6.08975	6.22462	6.39938	6.85825	6.59075	6.47063	6.33462	6.75363	6.301	6.70287	6.31588	6.58212	6.31425	6.3685	6.3115	6.66175	6.50375	6.13938	6.57525	6.36038	6.60137	6.43738	6.271	6.86287	6.26837	6.48163	6.5085	6.371	6.335	6.55187	6.45887	6.13237	6.37937	5.50488	5.56787	5.59112	5.3855	5.75188	5.75925	6.3525	5.96275	5.65212	5.25125	5.57688
ARL6IP5	9.887	9.517	9.6675	9.61725	9.4755	9.05625	9.7975	9.90775	9.33175	9.59125	9.52775	9.5735	9.4845	9.65175	9.6225	9.57625	9.88825	9.6655	9.59725	10.3085	10.2912	10.4253	10.1795	10.2027	10.2878	10.213	10.2528	10.181	10.1512	10.255	10.0935	10.2508	10.2973	10.3525	10.1683	10.1635	10.0612	10.1148	9.98775	9.769	9.832	9.72625	9.79725	9.946	10.037	9.7845	9.90175	9.6755	9.89825
ARL6IP6	9.588	9.497	9.431	8.849	9.32	8.822	9.709	9.854	8.814	9.109	9.447	9.584	8.865	9.697	9.174	9.367	9.362	9.638	9.651	10.227	10.422	10.328	10.237	10.288	10.147	9.955	10.319	10.427	9.835	10.265	10.284	10.478	10.454	10.351	10.21	10.25	10.298	10.688	10.335	9.562	9.773	9.424	9.812	9.619	9.898	9.397	9.74	10.109	10.283
ARL8A	4.145	4.138	4.00267	4.13633	4.04067	4.18	3.98433	3.90967	4.22467	4.11867	4.045	4.01333	4.22467	4.01733	3.93	4.03167	3.842	3.98533	4.187	4.69167	4.476	4.39233	4.676	4.495	4.71867	4.49933	4.717	4.50533	4.627	4.62167	4.69767	4.523	4.53167	4.50867	4.604	4.65133	4.85667	4.891	3.86	4.18033	3.97	3.854	3.949	4.04267	3.90633	4.08867	3.89967	3.86633	3.84633
ARL8B	7.43057	7.46771	7.60486	7.19186	7.57243	6.52071	7.57814	7.56571	7.33914	7.59757	7.49	7.51357	7.26471	7.64314	7.37057	7.29486	7.67743	7.65171	7.40329	7.88057	7.892	8.19557	7.89657	7.83357	8.06529	7.83671	7.81814	7.84786	7.826	7.842	7.88057	7.994	7.63629	7.87629	7.71043	7.74814	7.643	7.87057	7.30957	7.61257	8.01843	7.69914	7.61386	7.77014	7.37943	7.68057	7.592	7.71414	7.708
ARL9	2.755	2.873	2.88	2.809	2.897	3.258	2.837	3.003	3.078	2.74	3.015	3.555	3.077	2.749	2.894	2.813	2.856	3.061	2.96	3.811	3.719	3.512	3.74	3.735	3.542	3.838	3.889	3.588	3.94	3.641	3.695	3.435	3.655	3.628	3.899	3.724	3.785	3.888	2.743	2.55	2.761	2.838	2.724	2.798	2.535	2.827	2.84	2.774	3.007
ARMC1	7.007	6.61	6.9815	6.6865	6.857	5.864	6.893	7.1215	6.656	6.6075	6.6925	7.2585	6.747	6.863	6.7275	6.8285	7.123	6.7675	6.9515	6.82	7.0345	7.2395	7.028	6.8305	7.027	7.0185	7.078	7.2035	6.821	6.78	6.757	6.8375	7.2295	7.1485	7.069	6.9155	7.1505	6.79	6.4445	6.743	6.726	7.0585	6.696	6.6305	6.367	6.4755	6.5025	6.8145	6.916
ARMC10	6.0462	5.7198	5.9306	5.6702	5.7608	5.6466	5.8434	5.9634	5.8966	6.114	6.0392	6.101	5.622	5.9558	5.626	5.56	6.1988	5.9874	5.7486	6.9188	6.7274	6.7668	6.4938	6.8514	6.4494	6.499	6.638	6.4904	6.3738	6.2286	6.6224	6.8686	6.2168	6.6802	6.4858	6.352	6.449	6.961	6.7332	5.9302	6.432	5.727	6.269	6.0104	6.7164	5.7272	6.4884	6.6202	6.3434
ARMC2	3.6035	3.758	3.1	3.4955	3.853	4.247	3.7515	3.6375	3.6075	3.118	3.674	3.536	4.0375	3.9845	3.7865	3.747	3.371	4.0285	3.658	3.8535	4.0965	3.786	4.2635	3.712	3.867	3.84	4.2905	3.553	4.0325	4.327	4.226	4.0775	4.0475	3.697	4.133	4.249	3.574	3.8525	3.1815	3.4175	3.2595	3.1795	3.9805	3.4745	3.441	3.589	3.2395	3.2265	3.968
ARMC3	2.1895	1.8915	2.023	2.1455	2.0765	2.115	1.999	2.0425	2.154	2.489	2.1545	2.0215	2.244	1.9265	2.2105	2.242	2.05	2.0535	2.089	2.65	2.7525	2.7735	2.8685	2.6285	2.7435	2.8385	2.798	2.7445	2.785	2.8075	2.6785	2.759	2.6735	2.6815	2.6995	2.7115	2.7645	2.885	2.3385	2.4895	2.229	2.2505	2.2315	2.17	2.278	2.239	2.2	2.171	2.123
ARMC4	1.91167	1.93667	1.947	2.162	1.90667	2.26567	1.916	2.027	2.03433	1.96933	1.85333	2.04733	1.91333	1.97633	1.97167	2.029	1.94133	2.01367	1.99933	2.637	2.755	2.77167	2.75333	2.658	2.75833	2.71433	2.712	2.58433	2.826	2.69833	2.74633	2.62433	2.721	2.77067	2.74133	2.63567	2.66133	2.76067	2.31433	2.344	2.47933	2.484	2.408	2.31	2.40167	2.36933	2.399	2.517	2.33067
ARMC5	4.919	4.35933	4.28733	4.28833	4.432	6.22233	4.471	4.53967	4.538	4.22467	4.07867	4.318	4.571	4.131	4.58833	3.80867	4.409	3.77067	4.145	4.778	4.8	4.72367	4.428	4.84767	4.26567	4.942	4.745	4.488	4.90367	4.838	4.38267	4.28433	5.09833	4.28033	5.11533	4.87133	4.081	4.63933	3.14833	3.666	2.889	3.333	3.07067	3.19667	3.045	3.66833	3.161	2.888	3.12967
ARMC6	3.78825	3.532	3.81325	3.96075	3.67775	3.58375	3.80725	3.72925	3.9145	3.875	3.69725	3.6195	3.79125	3.5855	3.68225	3.57175	3.765	3.41275	3.7585	4.22125	4.08675	4.1015	4.2535	4.0565	4.179	4.13625	4.1385	3.84525	4.12625	4.1945	4.234	4.00025	3.956	4.0245	4.26025	4.23475	3.9395	4.0335	3.077	3.289	3.10775	2.962	3.18475	3.166	3.399	3.294	3.158	2.86325	3.047
ARMC7	4.3615	4.3175	4.1505	4.399	3.96	3.508	3.9965	4.0655	4.5275	4.0095	4.128	4.3235	4.3055	4.166	4.2715	4.1225	4.0945	3.841	3.957	3.8535	3.934	3.617	3.8335	3.8605	4.2915	3.7095	3.909	3.642	4.199	3.9965	4.079	3.936	3.811	3.807	4.1765	4.08	4.0285	4.0135	3.004	3.5885	3.1585	3.3725	2.9095	3.1355	3.104	3.4015	3.171	2.594	2.8445
ARMC8	5.20917	5.02917	5.31767	4.67917	5.509	5.49867	5.31833	5.37117	4.81183	5.11567	5.15567	5.63033	4.77567	5.37183	4.95517	5.408	5.58933	5.29933	5.26017	5.33383	5.524	5.3775	5.5785	5.73067	5.4075	5.36467	5.27133	5.765	5.20933	5.28333	5.23717	5.53583	5.67067	5.59383	5.1565	5.41867	5.4705	5.33783	5.559	4.91417	5.40267	5.13117	5.13633	5.25883	5.30867	4.69717	4.996	5.5885	5.592
ARMC9	1.911	1.876	1.864	1.789	1.83	2.402	1.79	2.028	1.962	2.001	1.972	2.078	2.155	1.922	2.168	2.263	1.806	1.795	2.034	2.353	2.544	2.395	2.52	2.362	2.658	2.436	2.576	2.661	2.673	2.464	2.544	2.656	2.729	2.453	2.562	2.444	2.491	2.622	2.449	2.174	2.589	2.334	2.39	2.189	2.31	2.125	2.372	2.438	2.62
ARMCX1	4.00733	4.285	4.15667	4.346	4.72367	3.80567	3.846	4.54	4.22833	4.09867	4.12267	5.11667	3.95467	5.02467	4.24667	3.60833	5.05067	4.52567	4.853	5.17933	5.46667	4.96833	4.898	5.17	4.59133	4.972	4.73267	4.95333	5.19133	5.15833	4.71633	4.84133	4.59533	5.04667	5.19133	4.68633	5.049	4.82467	5.18267	4.82767	4.62333	4.63033	4.818	3.585	4.61	4.39467	3.94233	5.10067	4.68533
ARMCX2	4.235	4.349	4.223	4.472	4.089	4.16	3.917	4.454	4.289	4.765	4.241	4.801	4.047	4.488	4.393	4.745	4.648	4.441	4.469	5.218	4.871	5.04	4.958	4.94	5.025	5.009	4.773	5.076	4.846	4.642	4.346	5.404	5.397	5.54	4.987	5.278	5.084	4.896	5.577	4.194	4.519	4.116	4.694	4.356	5.214	3.88	6.522	5.456	4.725
ARMCX3	7.40933	7.65367	7.53867	7.34567	7.768	7.19	7.65767	7.696	6.93767	7.75	7.25067	7.70867	7.32367	7.663	7.56033	7.665	7.71067	7.712	7.305	8.43167	8.522	8.325	8.359	8.65267	8.277	8.76867	8.31033	8.42533	8.09933	8.282	8.28033	8.36433	8.498	8.43867	8.23	8.23833	8.16133	8.20967	8.277	7.53533	7.58667	7.87633	7.8	7.81667	7.676	7.7	7.123	7.93133	7.97667
ARMCX4	3.6675	3.2095	3.3995	3.687	3.5585	3.754	3.3275	3.6355	3.721	3.3625	3.5425	3.481	3.499	3.715	3.5275	3.2305	3.064	3.307	3.6545	3.6125	3.4925	3.47	3.4225	3.5195	3.494	3.4555	3.56	3.568	3.348	3.573	3.665	3.5695	3.733	3.653	3.781	3.4625	3.857	3.7555	2.5015	2.7855	2.8495	2.5505	2.623	2.7725	2.9035	2.7185	2.875	2.486	2.672
ARMCX5	6.385	5.909	6.263	5.975	6.373	6.664	6.508	6.516	5.805	6.454	6.6	6.597	6.111	7.088	6.565	6.489	7.015	6.546	6.434	7.118	7.625	7.366	7.088	7.344	6.46	6.836	6.849	7.25	6.778	6.367	6.721	7.337	7.302	7.36	7.324	6.595	7.069	6.398	8.122	6.243	7.248	6.906	7.339	6.764	7.79	6.186	6.744	7.754	7.389
ARMCX6 /// LOC653354	6.138	5.829	6.207	6.105	5.965	5.592	5.96	6.076	5.897	6.031	5.794	6.311	6.32	5.856	6.035	5.921	6.171	6.177	5.929	6.77	6.767	6.658	6.592	6.686	6.569	6.849	6.55	6.603	6.628	6.025	6.554	6.848	6.671	7.033	6.967	6.613	6.303	6.349	6.618	6.102	6.041	5.816	6.304	6.367	6.725	6.37	6.491	6.33	5.948
ARMS2	2.437	2.549	2.503	2.809	2.556	2.996	2.546	2.461	2.477	2.4	2.611	2.476	2.604	2.712	2.658	2.808	2.563	2.806	2.314	3.328	3.352	3.291	3.064	3.17	3.078	3.247	3.256	3.18	3.02	3.156	3.216	3.308	3.464	3.053	3.146	3.118	3.195	3.334	2.64	2.755	2.685	2.375	2.469	2.583	2.699	2.775	2.492	2.7	2.596
ARNT	6.2668	6.5262	6.478	6.2188	6.2866	5.1722	6.223	6.2934	6.2088	6.0442	6.4394	6.1808	6.526	6.1704	6.3538	6.2394	6.1576	6.109	6.3376	6.4448	5.933	6.425	6.6228	6.3836	6.5426	6.6654	6.3106	6.2988	6.502	6.5472	6.6316	6.2818	6.5658	6.592	6.6594	6.433	6.536	6.2514	5.4536	6.2534	5.6886	6.1066	5.7668	6.284	5.3582	6.2794	5.5402	5.6558	5.2666
ARNT2	2.78725	2.44975	2.61	3.056	2.521	2.8895	2.5925	2.5485	2.60475	2.61525	2.5975	2.55725	2.69125	2.5395	2.67125	2.431	2.4705	2.378	2.533	3.3575	3.184	3.18125	3.06925	3.0585	3.07325	3.00375	3.14925	3.1815	3.01625	3.209	3.188	3.16175	3.13	3.11	3.191	3.14025	3.377	3.3615	2.4515	2.57725	2.696	2.46325	2.529	2.53025	2.619	2.55575	2.558	2.487	2.43475
ARNTL	7.30133	7.64	6.96933	7.05867	7.82833	7.796	7.69733	7.15767	7.24833	6.86367	7.688	7.56933	7.45233	7.175	7.339	7.58133	7.09967	7.21767	7.22633	7.85833	8.01533	7.94267	8.12133	7.71033	7.97333	8.00633	7.91033	8.00467	7.819	8.111	7.72	7.93567	8.02033	7.82467	7.60267	8.11	7.89333	8.05933	7.299	7.63333	7.559	7.71867	7.72167	7.71133	7.13067	7.496	7.269	7.58733	7.44767
ARNTL2	2.198	2.123	2.282	3.1	2.529	2.216	2.352	2.086	2.474	2.372	2.338	2.096	2.303	2.399	2.435	2.362	2.194	2.268	2.208	2.803	3.056	3.087	2.877	3.095	2.939	2.934	3.032	3.093	3.109	3.103	2.992	3.179	3.166	3.097	2.992	2.863	3.201	3.216	2.392	2.706	2.376	2.772	2.456	2.346	2.372	2.641	2.471	2.595	2.684
ARPC1A /// ARPC1B	7.793	7.821	7.795	7.845	7.642	7.362	7.721	7.514	7.94	7.536	7.869	7.74	7.769	7.566	7.807	7.804	7.829	7.845	8.054	7.75	7.712	7.437	7.786	7.449	8.086	7.625	7.59	7.457	7.912	8.029	8.006	7.824	7.223	7.434	7.543	7.534	7.898	8.163	7.036	7.911	7.611	7.479	7.656	7.613	7.601	7.774	7.556	7.148	7.389
ARPC1B /// LOC653888	10.919	10.665	10.707	10.892	10.587	10.206	10.586	10.491	10.983	10.562	10.52	10.419	10.822	10.474	10.646	10.603	10.568	10.527	10.512	10.455	10.472	10.295	10.598	10.418	10.832	10.403	10.444	10.222	10.71	10.657	10.588	10.317	10.274	10.332	10.507	10.469	10.633	10.927	9.016	10.194	9.737	9.956	9.723	10.1	9.75	10.332	9.888	9.13	9.423
ARPC2	11.213	11.299	11.38	11.331	11.445	11.352	11.193	11.214	11.36	11.235	11.401	11.159	11.433	11.163	11.193	11.328	11.28	11.201	11.228	11.363	11.394	11.351	11.409	11.369	11.679	11.402	11.397	11.312	11.48	11.568	11.462	11.39	11.267	11.356	11.439	11.382	11.532	11.603	10.838	11.237	11.115	11.134	11.222	11.216	11.058	11.035	11.105	10.984	11
ARPC3	10.3535	10.272	10.354	10.408	10.2635	10.076	10.1875	10.248	10.523	10.186	10.4185	10.148	10.3295	10.2875	10.2635	10.29	10.307	10.2595	10.035	10.3145	10.427	10.26	10.4655	10.272	10.7105	10.32	10.391	10.308	10.337	10.5305	10.4875	10.5385	10.013	10.3985	10.3795	10.4215	10.609	10.858	9.8365	10.3125	10.2425	10.0385	10.233	10.256	10.043	10.158	10.0755	9.845	10.1445
ARPC4	10.3447	10.3817	10.17	10.3117	10.2137	9.71067	10.1737	9.996	10.4043	10.0883	10.218	10.047	10.355	10.145	10.2477	10.18	9.985	10.227	10.273	10.121	10.0983	9.99333	10.2587	10.0567	10.2243	10.0557	10.0583	9.96533	10.2593	10.213	10.185	10.0307	9.856	9.91067	10.305	10.292	10.268	10.3767	9.154	9.93667	9.54733	9.78533	9.60333	9.781	9.53067	10.044	9.557	9.113	9.46267
ARPC5	9.53867	9.45433	8.95567	9.04867	9.27433	8.43567	9.163	8.96	8.959	8.91733	9.28633	9.059	9.06233	9.19333	9.05367	9.24	8.667	9.381	9.405	9.90033	9.64933	9.519	9.94833	9.43833	10.2403	9.61833	9.825	9.56567	9.74367	9.92633	9.85233	9.55967	9.556	9.656	9.428	9.75733	9.77867	9.78933	8.71267	9.41467	9.08867	9.275	9.039	9.13433	8.79333	9.345	9.02467	8.75267	9.15033
ARPC5L	6.8116	6.7476	6.853	6.793	6.8368	8.3642	7.0548	7.0804	6.592	6.7304	6.8106	6.9572	7.045	6.516	6.7748	6.7022	6.6898	6.4482	6.9776	7.0344	6.9276	7.0896	7.0684	7.414	6.795	6.98	7.0176	7.0318	7.123	6.7274	6.813	6.9396	7.5168	6.7938	7.208	6.7464	6.4562	6.6638	6.4594	6.2488	6.5364	6.5174	6.1186	6.3836	6.3152	6.3598	6.2598	6.2824	6.3124
ARPM1	2.648	2.345	2.429	3.135	2.461	2.398	2.424	2.582	2.247	2.322	2.259	2.371	2.394	2.448	2.398	2.317	2.637	2.578	2.169	3.124	3.093	3.2	3.176	3.29	3.276	3.169	3.271	2.997	2.992	2.856	3.164	3.142	3.124	3.174	3.337	3.267	3.317	3.408	2.521	2.299	2.594	2.207	2.43	2.554	2.528	2.663	2.39	2.552	2.588
ARPP19	5.3372	5.2274	5.3654	4.8502	5.2326	5.401	5.4542	5.4766	5.101	5.0344	5.2422	5.3894	4.9952	5.3478	5.1522	5.4352	5.5304	5.3856	5.3434	5.952	5.909	5.9762	5.7688	6.0032	5.9214	5.8752	5.7648	5.9936	5.7528	5.8302	5.8382	6.1196	5.904	5.8934	5.8622	5.9088	5.8416	5.8628	6.2258	5.5364	5.7372	5.5762	5.7754	5.411	5.93	5.1472	5.699	5.884	5.8234
ARPP21	2.419	2.201	2.32733	2.30533	2.371	2.619	2.156	2.33	2.47533	2.289	2.36167	2.29733	2.28533	2.52167	2.24033	2.214	2.31133	2.35167	2.35	2.898	2.89033	2.96533	2.96767	2.87333	2.785	2.84033	2.83633	2.991	2.82433	2.768	2.861	2.983	2.858	2.90033	2.882	2.78333	2.91233	3.24767	2.49333	2.191	2.26667	2.33633	2.431	2.34333	2.427	2.29	2.39367	2.46933	2.39067
ARR3	2.399	2.931	2.523	3.011	2.396	2.601	2.51	2.489	2.974	2.67	2.932	2.59	2.544	2.612	2.464	2.251	2.443	2.658	2.765	3.288	3.285	3.187	3.363	3.357	3.296	3.127	3.364	3.192	3.261	3.407	3.447	3.276	3.085	3.316	3.299	3.248	3.362	3.423	2.452	2.683	2.563	2.35	2.735	2.756	2.599	2.615	2.709	2.611	2.87
ARRB1	6.36	6.141	6.219	5.736	6.153	4.516	5.962	5.459	6.06	6.2	6.057	5.839	5.932	5.887	6.291	5.833	5.739	5.595	6.365	5.72	5.872	5.759	6.048	5.657	5.756	6.843	6.129	5.626	6.152	5.657	5.934	5.747	5.308	5.872	5.823	5.641	5.774	6.107	4.683	5.986	5.386	5.586	5.804	5.607	5.548	5.607	4.695	4.498	4.567
ARRB2	10.6217	10.609	10.4527	10.6757	10.379	10.583	10.3713	10.105	11.0303	10.5077	10.5857	10.0767	10.6103	10.4413	10.3747	10.5313	10.111	10.415	10.5277	10.4323	10.4617	10.257	10.7067	10.1837	10.785	10.4133	10.4887	10.2223	10.6163	10.8887	10.7223	10.512	10.0133	10.2733	10.501	10.6573	10.8307	11.0423	9.311	10.581	10.24	10.1307	10.2183	10.2327	9.922	10.567	10.4717	9.98	9.929
ARRDC1	5.426	5.793	5.794	5.532	5.712	5.524	5.563	5.598	5.922	5.691	6.033	5.355	6.057	5.449	5.514	5.519	5.552	5.568	5.569	5.653	5.557	5.781	6.001	5.902	6.167	5.836	5.997	5.845	6.171	6.036	5.897	5.781	5.708	5.377	5.619	5.881	5.556	5.953	4.444	5.194	4.872	4.549	5.44	4.36	4.803	4.955	4.617	4.305	4.908
ARRDC2	6.97	7.071	7.315	7.207	6.858	7.422	7.373	7.008	7.218	7.096	6.823	7.277	7.334	7.217	6.988	6.989	7.239	7.001	7.222	7.388	7.804	7.172	7.371	7.31	7.485	7.69	7.541	7.492	7.591	7.626	7.705	7.458	7.574	7.419	7.58	7.694	7.419	7.287	6.379	7.154	6.809	6.882	6.41	6.817	6.97	7.046	6.782	6.514	6.391
ARRDC3	8.25	8.706	7.60867	7.38167	8.44267	8.091	8.59433	7.66167	7.89633	6.731	8.336	8.242	7.61267	8.599	8.207	8.663	8.076	8.68667	8.2	8.374	8.87333	8.41067	8.35267	7.837	9.22333	8.59733	8.52933	8.54333	8.325	8.75767	8.54267	8.654	8.82667	8.56733	7.9	8.896	9.24567	8.58867	8.29867	8.94167	8.903	8.991	9.223	8.41867	9.18167	8.31067	8.66933	8.869	8.87467
ARRDC4	5.57833	5.02833	5.01067	4.61167	5.19133	5.85433	5.02133	5.70267	4.84433	5.21267	5.03033	5.43067	4.974	5.33867	4.52567	5.274	5.25367	5.666	5.60767	6.05833	5.73333	6.065	6.28733	5.72867	6.08667	6.28267	5.23367	5.78167	5.68267	6.04167	5.84467	6.00433	5.141	6.23567	5.75533	5.43767	5.47433	5.906	5.46467	6.345	6.236	4.685	5.56567	5.75267	5.90267	4.918	5.11633	5.69567	5.08967
ARRDC5	5.497	5.325	4.984	4.703	4.983	4.147	5.475	5.246	5.631	5.1	5.221	5.526	5.64	5.262	5.556	5.353	5.881	5.259	5.508	5.032	5.278	5.066	5.26	5.167	5.525	5.062	5.401	4.837	5.522	4.645	5.638	5.058	5.371	5.267	5.28	5.037	5.027	5.735	3.115	3.991	4.297	5.164	3.909	4.464	4.006	4.769	4.311	3.813	3.99
ARSA	3.82367	3.63367	3.54433	3.505	3.72567	3.58067	3.451	3.277	3.73067	3.557	3.714	3.33967	3.79767	3.46167	3.54667	3.66833	3.41267	3.088	3.538	4.092	4.08833	3.948	4.10967	4.053	3.75	3.698	4.19833	3.932	3.95733	4.43067	4.23533	4.09033	3.91133	3.93967	4.08467	4.24733	3.85333	4.06633	2.92167	3.20333	2.79	3.04367	3.108	3.12167	3.11333	3.411	2.768	2.905	3.067
ARSB	4.42075	4.7825	4.86425	4.62025	4.75375	4.67925	4.78025	4.89125	4.50525	4.582	4.7905	4.69625	4.803	4.869	4.49375	4.4195	4.50475	4.67375	4.9385	5.151	5.0535	5.0525	5.16	5.04225	4.96475	4.90725	5.1555	4.845	5.0605	5.15175	5.208	4.9495	4.74625	4.89025	5.2275	4.9455	5.02425	5.19275	4.55725	4.66025	4.5245	4.3805	4.51	4.63275	4.343	4.512	4.5525	4.541	4.4175
ARSD	3.538	3.92933	3.56133	3.597	3.729	3.57267	3.74633	3.63233	3.716	3.589	3.48533	3.39867	3.78467	3.557	3.98833	3.42833	3.75767	3.819	3.89833	4.48967	4.60533	4.47467	4.41167	4.399	4.37467	4.28633	4.417	4.55067	4.49933	4.36133	4.712	4.43167	4.58467	4.273	4.89133	4.55333	4.46067	4.655	3.9	3.99933	3.96533	3.71367	3.86567	3.93367	4.10667	4.04	3.92733	3.99433	3.47967
ARSE	2.97275	2.80825	2.956	3.0225	3.05175	3.01175	2.8395	2.975	2.84125	2.975	3.1045	2.914	2.96625	3.01075	2.79025	2.83875	2.6615	2.56775	2.98575	3.52475	3.3595	3.2595	3.322	3.3335	3.19925	3.1245	3.398	3.3645	3.351	3.35375	3.443	3.348	3.44075	3.36925	3.5655	3.412	3.517	3.5515	2.31925	2.6415	2.475	2.39425	2.3715	2.66425	2.484	2.64375	2.59375	2.399	2.45325
ARSF	2.031	2.071	2.223	2.173	1.967	2.301	1.98	2.303	2.269	2.032	2.231	2.191	2.187	2.372	2.3	2.039	2.142	2.216	2.33	2.583	2.677	2.605	2.791	2.784	2.839	2.828	2.816	2.738	2.681	2.659	2.83	2.651	2.655	2.886	2.912	2.747	2.814	2.848	2.39	2.047	2.227	2.197	2.174	2.21	2.588	2.247	2.41	2.427	2.183
ARSG	6.329	6.298	5.576	5.947	6.572	6.263	6.25	5.417	6.468	6.093	6.514	5.854	6.101	5.999	5.944	6.285	5.931	5.916	6.289	6.268	6.156	5.809	6.532	5.956	6.527	6.174	5.796	6.133	6.297	6.118	6.049	6.157	5.86	5.852	5.973	6.695	6.875	6.181	4.857	5.806	5.409	5.729	5.502	5.682	5.35	6.374	5.573	5.219	5.308
ARSH	2.035	1.782	1.998	1.941	2.202	2.347	2.094	1.897	1.932	1.944	2.174	1.914	1.892	2.239	1.935	2.247	2.111	1.917	2.032	2.353	2.688	2.599	2.682	2.7	2.751	2.557	2.742	2.85	2.626	2.711	2.564	2.655	2.621	2.563	2.786	2.571	2.756	2.484	2.16	2.277	2.212	2.054	1.969	2.25	2.11	2.289	2.361	2.039	2.066
ARSI	2.683	2.4035	2.3835	2.77	2.363	2.593	2.2165	2.4265	2.3625	2.3545	2.333	2.339	2.458	2.4175	2.307	2.357	2.084	2.659	2.4685	3.1265	3.1945	3.081	3.0845	3.111	3.1465	3.1225	3.208	3.089	3.0325	3.3055	3.332	3.3095	3.0655	3.2925	3.266	3.2885	3.3605	3.2275	2.288	2.582	2.3525	2.36	2.4245	2.456	2.4225	2.3285	2.6695	2.4645	2.2605
ARSJ	2.5715	2.4755	2.65825	2.64625	2.476	2.88175	2.50025	2.4745	2.55925	2.69925	2.38175	2.55125	2.57775	2.55975	2.504	2.34475	2.4025	2.526	2.49625	3.063	3.13475	3.093	3.1515	3.14975	3.01125	3.06425	3.17975	3.26425	3.01625	3.113	3.0995	3.11725	3.2875	3.1355	3.161	3.1195	3.27175	3.17625	2.51	2.3185	2.36825	2.462	2.3765	2.4335	2.393	2.3125	2.4505	2.4925	2.4545
ARSK	3.79933	3.476	3.556	4.169	3.698	3.33333	3.88067	4.075	3.82133	4.074	3.46733	3.937	3.34467	3.94633	3.501	4.07167	3.92567	4.11367	3.68267	4.303	4.41733	4.22267	4.042	4.30167	3.834	4.25367	3.96333	4.50967	4.13	3.92667	4.06133	4.50733	4.271	4.317	4.29267	4.23667	4.08633	4.351	4.684	3.776	4.403	4.049	4.31833	3.971	4.326	3.88367	3.95367	4.64233	4.541
ART1	2.82	2.403	2.395	3.031	2.574	2.601	2.401	2.686	3.032	2.483	2.661	2.549	2.506	2.523	2.661	2.561	2.806	2.459	2.534	3.47	2.908	3.354	3.326	3.243	3.203	3.431	3.249	3.278	3.296	3.577	3.311	3.255	3.167	3.233	3.339	3.086	3.272	3.081	2.678	2.946	2.621	2.493	2.507	2.805	2.572	2.639	2.536	2.721	2.668
ART3	2.6732	2.4512	2.3174	2.9624	2.4926	3.0232	2.4624	2.4174	2.5912	2.4094	2.5266	2.2988	2.5934	2.3754	2.3216	2.2678	2.2508	2.5694	2.4688	3.0176	2.9402	2.8742	3.0636	2.9876	3.009	3.018	2.989	3.0016	2.9812	3.1166	3.0494	3.0568	2.9456	3.0022	3.0212	3.0076	3.229	3.4978	2.4728	2.6152	2.533	2.4542	2.579	2.5674	2.6564	2.6756	2.607	2.6358	2.4846
ART4	1.923	2.227	2.113	1.755	1.877	1.903	2.038	2.069	2.204	2.111	1.922	2.188	2.222	2.069	1.903	2.146	2.015	2.191	2.161	2.651	2.7	2.754	2.831	2.754	2.751	2.831	2.845	2.562	2.824	2.702	2.642	2.618	2.564	2.882	2.786	2.786	2.739	2.675	2.199	2.124	2.093	2.253	2.341	2.333	2.241	2.391	2.434	2.288	2.106
ART5	2.4745	2.19	2.3515	2.471	2.241	2.368	2.3025	2.27	2.379	2.1685	2.4	2.313	2.3055	2.23	2.2945	2.4105	2.298	2.221	2.3	2.9425	2.7755	2.925	2.8215	2.8115	2.7795	2.98	2.799	2.8665	2.918	2.7845	3.012	2.8105	2.8535	2.8995	2.805	2.8675	3.02	2.965	2.477	2.3175	2.229	2.143	2.434	2.3555	2.505	2.357	2.504	2.388	2.5295
ARTN	3.0505	2.742	2.964	3.1855	2.5605	2.9585	2.5985	2.9185	2.989	3.121	2.8935	2.661	2.8125	2.769	2.8825	2.8895	2.885	2.475	2.94	3.6845	3.308	3.355	3.429	3.3545	3.474	3.3755	3.619	3.6435	3.393	3.669	3.524	3.42	3.3195	3.3395	3.6775	3.3685	3.7205	3.6105	2.63	2.7285	2.682	2.4895	2.6555	2.7985	2.581	2.728	3.0595	2.6035	2.394
ARV1	5.037	4.941	5.488	4.899	5.182	4.443	4.908	5.392	5.179	5.147	5.516	5.849	5.426	5.315	5.748	5.007	6.495	5.836	5.491	6.042	6.012	5.959	5.696	5.996	5.577	5.913	5.586	5.694	5.959	5.343	5.398	6.109	5.582	6.04	5.959	5.977	5.624	5.317	6.872	5.582	6.083	5.416	5.756	5.925	6.405	5.486	5.991	6.56	6.589
ARVCF	2.446	2.566	2.572	2.584	2.77	2.86	2.399	2.5475	2.645	2.7525	2.446	2.349	2.824	2.4625	2.6215	2.4815	2.4025	2.3815	2.6395	3.194	3.205	3.144	3.007	3.7445	3.0155	3.1225	3.2955	3.0305	3.2615	2.9785	2.9875	3.2965	3.2075	3.1245	3.488	3.0445	2.901	3.0705	2.4165	2.6105	2.6545	2.531	2.5305	2.408	2.534	2.837	2.4785	2.567	2.5545
ARVP6125	4.409	4.239	5.105	4.573	4.25	4.784	4.001	4.507	4.832	4.407	4.4	4.562	4.416	4.51	4.197	4.135	4.159	3.622	4.166	4.125	3.893	3.729	3.925	4.231	4.205	3.832	4.259	3.963	3.877	4.441	4.109	4.071	4.01	3.998	4.86	4.065	4.947	4.521	2.069	2.794	2.726	2.557	2.612	2.742	2.943	2.984	2.661	2.774	2.406
ARX	2.577	2.283	2.136	2.939	2.282	2.254	2.195	2.192	2.679	2.408	2.155	2.049	2.41	2.303	2.137	2.203	2.262	3.037	2.292	2.859	3.191	3.055	2.958	3.091	3.078	3.112	2.967	3.069	3.274	3.142	3.166	3.129	3.121	2.916	3.08	2.871	3.168	3.699	2.809	2.782	2.863	3.007	2.92	3.029	2.916	2.589	2.927	3.134	2.777
AS3MT	6.3515	7.124	7.0695	6.126	6.179	6.0925	6.2735	6.891	6.5455	5.9105	6.3785	6.3945	6.428	6.6415	6.8025	7.0985	7.457	7.1395	6.771	7.7785	7.0955	7.238	7.363	5.7625	7.767	7.2745	6.454	7.8965	7.1295	7.031	7.976	6.7735	7.0845	7.2935	7.5805	7.5455	6.16	5.457	6.3205	7.099	4.7555	6.985	6.4105	7.2005	6.04	7.3255	6.279	5.6655	6.758
ASAH1	9.007	9.5918	8.917	8.8018	9.1644	9.1854	8.8528	8.56	9.2632	8.8722	9.26	8.845	8.8824	8.6738	8.9202	8.7076	8.4112	9.2618	8.687	9.064	9.6318	8.9542	9.4682	9.2382	9.7178	9.2888	9.1768	8.9756	9.5328	9.168	9.1276	9.8508	8.5462	9.6904	9.4208	9.1234	9.9434	9.1778	9.2834	9.2796	8.9774	9.3308	9.3998	8.886	8.4176	9.2174	9.3912	8.897	8.9404
ASAH2 /// ASAH2B /// ASAH2C	2.5835	2.26	2.2585	2.622	2.223	2.6	2.337	2.181	2.3075	2.23	2.182	2.2685	2.335	2.4955	2.2145	2.2385	2.1785	2.3555	2.2425	2.7265	2.992	2.9395	2.899	2.884	2.8575	2.915	3.255	2.974	2.8555	2.996	2.837	2.979	2.886	2.86	2.8835	2.955	2.916	3.156	2.769	2.2955	2.495	2.386	2.7195	2.341	2.472	2.431	2.766	2.727	2.652
ASAH2 /// ASAH2C	3.147	3.173	2.971	3.148	3.43	2.538	3.095	2.94	3.125	3.046	2.909	3.115	3.316	2.912	3.079	3.377	3.412	3.366	3.111	3.689	3.229	3.676	3.641	3.313	3.929	3.668	3.991	3.32	3.657	3.696	3.499	3.267	3.751	3.635	3.464	3.588	3.87	3.638	2.519	3.004	3.386	3.42	3.401	2.854	3.009	2.989	2.374	3.053	2.809
ASAM	3.643	4.12533	3.06067	3.23533	3.31133	2.97967	3.69533	3.10833	3.485	3.38033	3.24467	3.22333	3.41133	3.342	3.24267	3.72033	2.941	3.023	3.26433	3.53067	3.55033	3.95767	4.098	3.46	4.13733	3.54633	3.599	3.91567	3.64267	3.591	3.801	3.35233	3.96367	3.73567	3.452	3.67267	3.63667	3.62033	2.84633	3.30833	3.483	3.593	3.385	3.24767	3.176	3.65767	3.33233	3.333	3.26133
ASAP1	9.244	8.9935	9.03675	9.016	9.00825	9.47525	9.04025	8.821	9.18625	9.1855	9.4225	8.88475	9.0725	9.178	9.06425	9.3445	8.565	9.1345	9.03975	9.79675	9.40225	9.6215	10.0902	9.159	9.98325	9.4505	9.69075	9.448	9.662	9.90325	9.9435	9.38075	9.02475	9.54775	9.632	9.53025	9.93675	9.6485	8.6625	9.36425	9.07275	9.049	8.88025	9.1495	8.5555	9.24375	9.04075	8.71175	8.8915
ASAP2	6.392	6.554	6.856	6.507	6.969	5.978	7.162	7.115	6.371	7.618	7	7.277	6.495	7.391	6.949	6.63	7.333	7.125	6.717	7.828	7.744	8.134	8.07	7.816	7.205	7.609	7.19	7.86	7.189	7.783	7.778	8.237	7.755	7.983	8.014	7.589	7.753	7.698	6.764	7.658	6.954	7.222	7.953	7.082	8.476	7.073	7.536	7.445	7.14
ASAP3	2.6575	2.776	2.571	2.922	2.5105	2.7285	2.6215	2.7345	2.732	2.7515	2.6605	2.6165	2.6385	2.675	2.4765	2.357	2.643	2.6225	2.65	3.174	3.191	3.143	2.989	3.0885	3.0215	2.953	3.0595	3.111	2.989	3.059	3.1145	3.062	3.1065	3.0085	3.138	2.997	3.1175	3.292	2.716	2.7095	2.5825	2.7615	2.585	2.7245	2.537	2.661	2.7695	2.608	2.671
ASB1	6.2765	6.626	6.6765	6.3965	6.2425	6.6525	6.4215	6.6635	6.419	6.7035	6.3535	6.605	6.566	6.514	6.661	6.4345	6.4685	6.1545	6.437	6.4545	6.6975	6.971	6.8935	7.5035	6.6995	6.6225	6.823	6.69	6.984	6.3075	6.864	6.4655	6.8025	6.884	7.16	6.6535	6.49	6.62	6.1005	6.261	6.087	6.3795	5.9855	6.115	6.1835	6.372	6.2495	6.0375	6.0485
ASB10	2.88	2.9305	2.9725	2.9515	3.1975	3.109	3.06	2.883	3.1635	3.1095	2.9935	2.967	2.933	2.7095	2.9335	3.1175	3.0325	2.995	3.251	3.594	3.418	3.4705	3.5245	3.4385	3.4655	3.4245	3.4435	3.4715	3.4765	3.536	3.3735	3.3795	3.6205	3.404	3.5955	3.5135	3.445	3.5225	2.7645	2.761	2.994	2.6365	2.605	2.6435	2.688	2.8325	2.554	2.7025	2.642
ASB11	2.29667	2.338	2.23767	2.871	2.33267	2.57733	2.20233	2.186	2.62167	2.335	2.44267	2.25033	2.21967	2.494	2.273	2.29767	2.27033	2.26733	2.418	2.89133	2.92533	2.852	2.91067	3.00033	2.907	2.92133	3.04033	2.95067	2.797	2.919	2.98667	3.04467	2.98167	3.01033	2.944	2.83633	3.038	3.09467	2.47433	2.543	2.312	2.47933	2.508	2.618	2.53633	2.418	2.691	2.55567	2.483
ASB12	3.032	2.68	2.841	2.775	2.894	2.976	2.711	2.672	2.968	2.853	2.986	2.652	2.85	2.676	2.867	2.793	2.689	2.872	2.76	3.371	3.265	3.539	3.246	3.304	3.592	3.207	3.13	3.352	3.187	3.271	3.286	3.316	3.212	3.071	3.112	3.208	3.272	3.238	2.657	2.851	2.543	2.627	2.878	2.643	2.688	2.643	2.658	2.516	2.73
ASB13	3.225	3.3475	3.7845	3.3535	3.4525	3.108	2.9905	3.2515	3.406	3.4105	3.4555	3.5365	3.8975	3.5725	3.63	3.226	3.3945	3.2885	3.396	4.184	3.8425	4.044	4.2825	4.0065	4.079	3.8665	3.7635	3.775	4.0445	4.0145	3.962	3.8315	3.863	4.049	3.9485	4.017	3.6455	3.67	2.842	3.251	3.099	3.0585	3.3315	3.2065	3.2515	3.462	2.9155	3.1155	3.48
ASB14	3.8825	3.4305	3.592	3.6115	3.7545	4.13	3.883	3.9115	3.866	4.05	3.6315	4.034	3.4125	3.5105	3.721	3.5465	3.911	3.6025	3.304	4.525	4.542	4.369	4.4135	4.605	4.65	4.4995	4.826	4.319	4.3265	4.544	4.768	4.243	4.7175	4.461	4.165	4.352	4.381	4.5445	4.062	3.6455	3.827	4.2545	3.836	3.881	3.8735	3.9485	3.765	3.8755	4.2965
ASB15	2.0615	2.142	2.0575	2.192	2.103	2.2655	2.064	1.9965	2.0805	2.199	2.104	1.961	2.072	2.1655	1.9635	2.0495	2.0395	2.066	2.111	2.717	2.8355	2.7085	2.801	2.938	2.762	2.7565	2.834	2.918	2.835	2.787	2.7175	2.8275	2.8505	2.821	2.882	2.9085	2.865	2.851	2.339	2.248	2.293	2.2705	2.1465	2.29	2.1905	2.1735	2.248	2.448	2.3165
ASB16	2.83867	2.498	2.62867	2.719	2.69367	2.57967	2.521	2.56967	2.64967	2.65667	2.59533	2.43733	2.48633	2.49033	2.58733	2.41733	2.42167	2.56767	2.58467	3.29367	3.03333	2.95367	3.035	3.11067	3.08767	2.99567	3.15067	3.002	3.12533	3.29633	3.09933	3.077	3.24933	3.001	3.16667	3.144	3.33767	3.05067	2.279	2.57233	2.58367	2.43433	2.328	2.55867	2.49633	2.557	2.54967	2.431	2.356
ASB17	1.738	1.702	1.692	2.046	1.949	2.06	1.834	1.681	1.74	1.873	1.785	1.767	1.985	1.736	1.913	1.771	1.754	1.862	1.799	2.705	2.647	2.713	2.738	2.604	2.715	2.641	2.695	2.744	2.711	2.676	2.718	2.756	2.721	2.692	2.662	2.572	2.685	2.888	2.359	2.269	2.249	2.263	2.436	2.159	2.385	2.073	2.045	2.095	2.298
ASB18	1.781	2.088	1.775	1.958	2.108	2.032	2.141	2.087	2.175	1.684	2.018	1.883	2.283	2.173	1.833	2.004	1.938	1.954	2.058	2.639	2.661	2.555	2.721	2.728	2.72	2.624	2.622	2.626	2.687	2.567	3.023	2.622	2.734	2.755	2.875	2.513	2.721	2.818	2.18	2.352	2.12	2.272	2.29	2.418	2.116	2.276	2.379	2.335	2.333
ASB2	2.93	2.844	2.952	2.863	2.89	2.501	3.538	3.233	3.755	2.91	3.157	3.579	3.122	3.12	2.721	2.875	3.013	3.149	3.089	3.557	3.05	3.174	3.243	3.411	2.89	2.992	3.149	3.226	3.203	3.186	3.034	3.063	2.829	3.133	3.034	3.159	2.922	3.474	2.6	2.771	2.426	2.535	2.725	2.514	3.25	2.642	2.463	2.605	2.751
ASB3 /// GPR75 /// LOC100302652	7.65	7.653	7.746	7.678	7.781	8.27	7.618	7.713	7.617	7.397	7.667	8.191	7.552	7.744	7.554	7.61	7.926	7.586	7.81	8.51	8.139	8.354	8.355	8.575	8.185	7.921	8.212	8.546	8.142	8.345	8.311	8.25	8.834	8.44	8.698	8.324	8.336	8.437	7.88	7.74	7.871	8.286	7.694	7.994	7.655	8.072	8.284	8.401	8.173
ASB4	2.397	2.959	3.249	2.998	2.834	2.927	2.7	2.953	2.834	3.425	3.122	2.783	3.006	3.138	2.954	3.018	3.166	2.977	2.974	3.739	3.56	3.487	3.572	3.842	3.748	3.606	3.646	3.693	3.669	3.777	3.583	3.6	3.574	3.341	3.77	3.51	3.793	3.703	2.643	2.642	2.652	2.472	2.66	2.466	2.694	2.607	2.407	2.833	2.614
ASB5	2.1125	1.9985	2.1625	2.2455	2.076	2.456	2.024	2.16	2.076	2.199	2.085	2.044	2.0075	2.1645	2.019	1.9885	2.0595	2.078	2.215	2.602	2.65	2.825	2.7415	2.7705	2.8075	2.6535	2.7225	2.788	2.5645	2.5905	2.812	2.8505	2.6415	2.649	2.7085	2.635	3.0085	2.6565	2.3285	2.3985	2.419	2.288	2.271	2.257	2.4415	2.1925	2.424	2.2735	2.3605
ASB6	4.73333	4.94367	4.88233	4.79133	4.926	5.458	4.761	4.81433	4.93933	4.69867	4.837	4.67533	4.813	4.804	4.61367	4.80767	4.84167	4.60467	4.88367	5.48833	5.71533	5.531	5.50933	5.49967	5.67433	5.61967	5.483	5.21067	5.74933	5.622	5.54967	5.377	5.56167	5.415	5.59	5.564	5.343	5.294	4.53967	4.38967	4.26833	4.39933	4.59733	4.29433	4.56	4.49533	4.33333	4.36967	4.223
ASB7	6.29067	6.271	6.23933	5.98667	6.226	6.19067	6.549	6.286	6.05967	6.08967	6.25033	6.48733	5.98033	6.39433	6.109	6.26233	5.904	6.72567	6.38767	6.39467	6.633	6.844	6.74467	6.70933	7.02767	6.896	6.90233	6.75367	6.903	6.73533	6.801	6.725	6.60833	6.78733	6.51067	6.86567	6.72367	6.83133	6.00033	6.434	6.461	6.62367	6.302	6.48433	5.94333	6.229	6.54233	6.60067	6.48367
ASB8	7.66	7.52467	7.31767	7.15533	7.28	6.831	7.448	7.254	7.27667	7.09467	7.291	7.41333	7.50133	7.32833	7.514	7.40033	6.93867	7.32933	7.29167	7.2	7.07233	7.10367	7.31933	7.17867	7.582	7.237	7.43967	7.21767	7.62867	7.38267	7.44567	6.99033	7.31933	7.20667	7.154	7.33733	7.344	7.514	6.376	7.35967	7.014	7.24067	7.031	7.234	6.92367	7.58567	7.00567	6.567	6.95367
ASB9	3.10233	3.03933	2.954	3.14633	2.921	3.16667	2.93767	2.82433	2.82033	2.939	2.85167	3.023	3.03133	3.01767	2.96633	3.224	2.96833	2.87867	2.91533	3.89267	3.92633	3.61567	3.839	3.71867	3.798	4.07267	3.731	3.71367	3.57133	3.67933	3.82	3.97833	3.598	3.78533	3.811	3.585	3.62567	3.84367	3.24367	3.061	2.875	2.897	2.73533	3	2.866	2.94933	2.925	2.975	2.90767
ASCC1	5.42033	5.6915	5.96367	5.13067	5.814	5.5295	5.9005	5.97433	5.47117	5.9665	5.62433	5.94183	5.84983	5.6925	5.6735	5.81533	6.2495	5.61767	5.68067	5.83367	5.94867	5.98067	5.91217	6.34083	6.13767	6.11133	5.96617	6.06167	5.93817	5.69583	6.27967	6.19467	6.0585	6.07983	6.2385	5.86067	6.48867	6.11167	6.1755	5.77733	5.8775	5.70867	5.76117	5.63067	5.60233	5.5995	5.8175	5.63733	5.64467
ASCC2	7.905	7.318	8.263	7.859	7.393	8.141	7.427	7.132	8.206	9.287	8.509	7.179	8.017	7.469	8.739	8.627	7.467	8.291	7.83	7.881	7.054	7.826	7.036	7.521	7.987	7.869	7.536	8.322	7.725	8.236	7.724	8.379	7.627	7.045	7.252	7.682	7.378	7.068	5.002	7.938	6.394	7.104	6.865	7.13	6.706	7.661	6.974	6.38	6.279
ASCC3	3.962	4.00925	3.88175	3.75475	3.96825	3.98975	4.09775	4.069	3.70275	3.97525	3.75	3.99175	3.784	3.74675	3.95725	4.07125	4.0485	4.02325	3.71275	4.6105	4.62175	4.751	4.59375	5.046	4.4605	4.70925	4.73375	4.67975	4.54125	4.45725	4.55975	4.77	4.72575	4.579	4.51425	4.7635	4.45525	4.25425	4.443	4.09775	4.425	4.48675	3.955	4.0725	4.348	4.06925	4.11575	4.315	4.28825
ASCL1	2.257	2.379	2.32033	2.57733	2.347	2.33433	2.345	2.34333	2.52067	2.29267	2.297	2.227	2.28	2.30133	2.39333	2.31233	2.33233	2.228	2.30333	2.893	2.77533	2.89633	2.81133	2.83067	2.77067	2.936	3.01233	2.81767	2.858	2.88233	2.82533	2.84333	2.872	2.84867	2.863	2.79867	2.93867	2.91	2.259	2.33767	2.41067	2.39133	2.45233	2.368	2.38133	2.50867	2.48067	2.36033	2.27333
ASCL2	6.333	6.884	6.329	5.989	6.433	6.431	6.43	6.58	6.34	6.559	6.003	6.237	6.877	5.985	6.357	6.284	6.106	6.318	6.45	6.752	6.85	6.655	6.859	6.931	6.15	6.655	6.691	5.894	6.467	6.591	6.38	6.083	7.26	5.988	6.379	6.363	6.312	5.952	5.943	6.396	6.501	5.643	5.875	5.907	6.85	6.293	5.865	5.955	5.637
ASCL3	1.929	2.193	2.039	1.936	1.85	2.445	2.037	2.056	2.052	2.19	2.057	1.878	2.119	2.298	2.074	2.11	1.968	2.013	2.1	3.021	2.631	2.912	2.788	2.893	2.96	2.852	2.696	2.766	2.88	2.718	2.765	2.566	2.694	2.906	2.801	2.745	2.854	2.757	2.347	2.258	2.414	2.296	2.275	2.372	2.278	2.178	2.249	2.156	2.101
ASCL4	3.0035	2.952	2.8355	3.0325	2.9795	2.9965	2.7495	2.762	2.7855	2.6925	2.9715	2.762	2.835	2.95	2.757	2.8145	2.794	2.8285	2.966	3.425	3.3445	3.327	3.253	3.3555	3.316	3.2115	3.3905	3.219	3.289	3.321	3.4615	3.3115	3.3245	3.3205	3.2655	3.1415	3.212	3.282	2.658	2.681	2.5965	2.7875	2.65	2.743	2.8215	2.602	2.8495	2.698	2.757
ASF1A	7.40567	7.15233	7.784	7.14067	7.454	5.80567	7.78667	8.01433	7.22467	7.41733	7.60633	8.01167	7.09867	7.619	7.62167	7.55767	7.95167	7.51933	7.74633	8.10333	8.09833	8.32433	7.98267	8.27033	7.77033	7.84033	7.785	8.437	8.065	8.09867	8.009	8.40567	8.166	8.48967	8.175	8.01033	8.05533	8.18833	8.50233	7.62833	8.01167	8.063	7.90667	7.868	7.978	7.64767	8.437	8.76833	8.335
ASF1B	4.20067	4.77933	4.07133	3.63933	4.55533	3.95733	3.91533	3.77433	5.07433	3.77267	4.784	4.37267	4.26533	3.893	4.56633	4.147	3.41067	4.00533	4.78167	4.211	4.413	4.15733	4.57033	4.36733	4.64467	4.68533	4.30333	4.25133	4.59	4.65967	4.70167	4.37367	4.007	4.526	4.74467	5.047	4.91433	4.63433	3.40733	4.454	3.24967	3.78333	3.78333	3.73333	3.41667	3.79433	3.317	3.27433	3.64267
ASFMR1	1.903	1.703	1.841	2.225	1.909	2.187	1.809	1.591	1.674	1.796	1.897	1.88	1.747	1.694	1.925	1.581	1.549	1.795	1.659	2.551	2.587	2.506	2.502	2.478	2.546	2.519	2.514	2.482	2.568	2.513	2.515	2.537	2.469	2.424	2.432	2.618	2.627	2.498	2.243	2.007	2.027	2.037	2.384	2.113	2.225	2.263	1.969	2.153	2.103
ASGR1	5.254	5.347	5.556	5.039	5.5	4.099	4.7325	5.227	4.8225	5.3745	5.424	4.7915	5.651	5.507	5.013	4.7895	5.343	5.1985	5.136	4.846	4.293	4.906	4.71	4.381	4.8845	4.482	4.393	4.1915	4.5825	4.5875	4.306	4.216	4.015	4.414	4.6585	4.341	4.0965	4.3095	2.628	3.915	3.7795	3.7005	3.725	3.722	3.0845	4.597	3.2555	3.219	3.3115
ASGR2	5.447	5.0255	5.686	4.821	5.3965	4.3895	5.1235	5.298	5.82	5.591	5.1155	4.624	4.991	5.2775	4.9055	4.3575	5.0355	4.6695	4.8435	6.1415	4.913	5.132	5.4635	5.613	5.5305	4.9235	4.9175	5.071	4.964	5.662	5.0995	4.98	4.909	4.982	6.0535	5.2655	5.363	5.3655	3.7075	4.396	4.741	4.068	4.11	4.662	4.023	5.2635	4.5405	4.273	4.249
ASH1L	6.8495	6.88875	6.458	6.755	6.836	6.57025	6.72175	6.58025	6.72875	6.56125	6.494	6.60275	6.74925	6.46175	6.719	6.77025	6.5695	6.573	6.67375	6.94725	6.85675	6.784	7.0265	6.8165	7.20825	7.02075	7.02925	6.6995	7.02	6.73675	7.098	6.64275	7.06525	6.96425	6.83825	7.1135	6.737	6.78125	5.75025	6.3435	6.41175	6.7065	6.28525	6.489	6.012	6.9115	6.18075	6.124	6.26225
ASH2L	8.5775	8.824	8.5765	8.627	8.614	7.164	8.6255	8.522	8.5315	8.859	8.578	8.655	8.7605	8.4465	8.8885	8.69	8.615	8.4535	8.4985	8.6715	8.3915	8.61	8.9225	8.408	8.8205	8.569	8.5595	8.796	8.7105	8.816	8.6205	8.371	8.713	8.523	8.56	8.636	8.664	8.4995	7.8585	8.8515	8.2205	8.7545	7.8795	8.8585	7.5635	8.782	7.743	7.9055	7.972
ASIP	2.726	2.892	2.955	2.96	2.628	2.878	2.502	2.766	2.879	2.611	2.814	2.753	2.801	2.806	2.711	2.906	2.979	2.766	2.224	3.384	3.351	3.437	3.476	3.438	3.451	3.516	3.523	3.465	3.719	3.658	3.615	3.382	3.187	3.488	3.766	3.817	3.575	3.535	2.709	2.711	2.498	2.779	2.497	2.416	2.842	2.648	2.669	2.68	2.869
ASL	4.771	4.957	5.0414	4.6306	4.9326	4.9622	4.8	4.782	5.1626	4.841	5.1112	4.4702	5.1698	4.795	4.8254	4.8678	4.897	4.6484	5.087	5.6082	5.5176	5.2656	5.4562	5.6914	5.4984	5.4052	5.4032	5.1546	5.765	5.4998	5.515	5.2538	5.3486	5.15	5.5854	5.4454	5.4326	5.5262	4.1818	4.7572	4.4164	4.3536	4.5512	4.3336	4.767	4.7088	4.3684	3.857	4.3902
ASMT	2.846	3.156	2.961	3.269	3.49	3.286	3.407	3.273	3.793	2.93	3.276	3.818	3.136	3.392	3.525	2.99	3.755	2.888	3.631	3.806	3.799	4.385	3.75	3.535	3.523	3.704	4.332	3.591	3.822	3.83	3.643	3.896	4.024	3.732	3.978	3.711	3.666	3.664	2.839	2.84	2.497	2.961	3.253	2.542	2.653	2.493	2.662	2.964	2.875
ASMTL	6.193	5.994	5.994	6.232	5.874	5.837	5.66	5.755	6.461	5.889	6.129	5.845	6.44	5.8	5.963	5.827	5.89	5.964	5.974	7.173	7.235	6.646	7.196	7.251	7.387	7.233	7.251	6.822	7.697	7.273	7.313	7.046	7.508	7.058	7.219	7.191	7.052	7.224	5.764	6.377	5.714	5.885	5.856	5.74	6.251	6.741	5.693	5.192	5.453
ASNA1	6.5365	6.601	6.525	6.557	6.454	5.8865	6.5485	6.417	6.777	6.886	6.709	6.323	6.931	6.635	6.647	6.485	6.6005	6.836	6.8105	6.715	6.246	6.366	6.4185	6.48	6.2305	6.343	6.3125	6.254	6.6605	6.763	6.2585	6.2815	6.2265	5.8795	6.4115	6.594	6.0785	6.198	5.739	6.449	5.848	5.988	6.2965	6.1045	6.229	6.609	6.033	5.1345	5.7815
ASNS	8.00075	7.596	7.5725	8.538	7.995	8.157	7.59375	7.767	8.0885	8.03675	7.82675	8.19875	7.9605	7.113	7.94175	7.995	8.04375	7.89525	7.37325	8.47925	8.422	8.542	8.1085	8.42025	8.2925	8.537	8.40025	8.7495	8.7515	7.69025	8.42675	8.5105	8.98225	8.9695	8.638	8.4665	8.39475	8.59025	7.94075	7.4475	7.9815	8.12275	7.7745	8.1805	8.083	8.01675	8.41075	8.2895	7.844
ASNSD1	5.687	6.081	6.075	5.9505	6.039	7.1825	6.2315	6.4405	5.911	6.0855	5.943	6.5	6.299	6.455	6.176	6.453	6.38	6.4305	5.8075	6.348	7.147	7.044	6.3035	7.1365	6.9355	6.805	6.747	6.7895	6.709	6.9695	6.519	7.8035	6.179	7.2	6.379	6.635	6.399	6.658	7.801	6.3235	7.2075	6.4765	7.111	6.2285	7.5905	5.8375	7.085	7.673	7.359
ASPA	3.062	2.9	2.607	3.406	2.784	3.336	2.844	2.818	2.843	2.95	2.858	2.853	2.764	2.885	2.83	2.87	2.627	2.775	2.588	3.116	2.941	3.212	2.945	2.937	3.094	3.136	3.018	3.012	3.172	3.137	3.067	2.977	3.116	2.967	2.96	3.047	2.931	3.608	2.392	2.823	2.747	2.68	2.884	2.441	2.841	2.822	2.611	2.385	2.842
ASPDH	2.626	2.558	2.706	2.523	2.43	2.777	2.148	2.502	2.513	2.417	2.457	2.302	2.7	2.607	2.391	2.558	2.136	2.41	2.769	3.182	3.213	3.374	3.115	3.091	3.114	2.934	3.107	3.109	3.014	3.248	3.207	3.036	3.042	2.883	3.093	3.158	3.057	3.072	2.206	2.53	2.082	2.434	2.323	2.458	2.52	2.448	2.298	2.165	2.323
ASPG	2.561	2.7355	2.543	2.614	2.724	2.738	2.712	2.523	2.7785	2.6	2.692	2.569	2.679	2.642	2.715	2.6485	2.77	2.546	2.965	3.3125	2.9475	3.217	3.01	2.95	3.0765	3.0135	2.9415	2.9595	2.9235	2.998	3.1185	2.9355	2.874	2.925	3.1165	2.9405	2.958	3.061	2.333	2.4525	2.319	2.4135	2.3235	2.2415	2.336	2.3555	2.3125	2.197	2.232
ASPH	4.07744	3.96089	3.82389	3.78056	4.08022	4.33844	3.87389	3.81378	3.71111	3.59367	4.005	4.106	3.65589	4.57289	3.60867	4.138	3.71133	4.31511	3.70233	4.70644	4.84533	4.98422	4.55411	4.32267	4.96411	4.17122	4.39544	4.69067	4.43044	4.38033	4.52222	4.87556	4.75344	4.68722	4.52544	4.27656	4.26267	4.79056	4.638	4.37233	4.73611	4.29433	4.53767	4.21011	4.259	4.04678	4.59889	4.535	4.93111
ASPHD1	2.82	2.615	2.596	2.507	2.795	2.643	2.733	2.818	2.582	2.707	2.628	2.429	2.823	2.662	3.275	2.517	2.925	2.676	2.911	3.315	3.326	3.295	3.121	3.121	3.112	3.184	3.089	2.859	3.003	2.989	3.278	3.142	3.21	3.196	3.147	3.119	3.04	3.043	2.373	2.492	2.386	2.53	2.478	2.397	2.511	2.656	2.534	2.407	2.261
ASPHD2	6.4055	6.7065	6.666	6.271	6.874	6.2675	6.65	6.4645	6.6235	6.6665	6.4955	6.448	6.9625	6.5105	6.585	6.8995	6.3975	6.4985	6.572	7.101	6.829	7.519	7.721	7.061	6.9765	6.9935	7.4825	6.8285	7.094	7.3935	7.393	7.0405	6.882	6.9705	6.8225	6.7165	7.2565	6.4855	6.5	7.0215	6.601	6.759	6.391	7.2295	6.304	6.769	5.9245	6.33	6.593
ASPM	2.4375	2.071	2.3385	2.665	2.2985	2.491	2.481	2.3645	2.688	2.1075	2.2285	2.28	2.547	2.2905	2.1715	2.211	2.5515	2.8245	2.493	3.021	3.0825	3.008	3.3105	3.6915	3.092	2.765	3.0295	3.226	2.7945	2.978	3.687	3.5815	3.507	2.895	3.296	2.984	3.4525	3.254	3.075	2.692	2.8605	2.717	3.1075	2.6515	3.0085	2.399	2.3645	2.599	3.0725
ASPN	3.07725	2.77775	2.89675	2.86825	2.6875	2.66125	2.833	2.7445	2.832	2.81025	2.60975	2.67925	2.637	2.5905	2.62875	2.96225	2.827	2.6755	2.7215	3.062	3.0085	3.3745	2.97	3.13725	3.23125	3.4245	3.0285	3.26325	2.95475	3.14825	3.05825	3.20675	3.61	3.0815	3.031	2.96575	3.15725	3.3255	2.488	2.40275	2.6215	2.67	2.8125	2.6005	2.59925	2.466	2.5775	2.581	2.735
ASPRV1	6.78	7.655	6.131	6.787	6.391	6.226	6.711	6.268	7.655	5.818	6.954	6.554	7.534	7.111	6.585	7.444	4.972	6.756	6.679	7.994	8.09	7.519	8.638	6.377	8.223	8.099	8.009	7.64	7.58	8.359	8.086	7.97	6.561	7.414	7.353	8.083	8.284	7.58	5.743	7.27	5.6	6.195	6.232	6.632	6.593	7.208	5.567	5.993	6.554
ASPSCR1	4.3	4.3675	4.4675	4.2065	4.4345	4.4315	4.381	4.5205	4.904	4.5615	4.3855	4.5025	4.8535	3.8485	4.4415	4.081	4.5745	4.343	4.48	5.1165	5.1795	4.9215	4.894	5.806	4.8255	5.3165	5.2405	5.058	5.558	5.0425	5.255	5.029	5.2955	4.9885	5.316	5.2675	4.913	5.1485	3.616	3.6135	3.3765	4.0415	3.8555	3.8665	3.916	4.0915	3.736	3.4055	3.3785
ASRGL1	3.80033	4.32067	4.70167	4.12733	4.129	4.52933	4.272	4.14867	4.27033	4.638	4.25167	4.50233	4.77267	4.68	4.224	4.36133	3.96633	3.99367	4.346	5.04733	4.708	5.14067	4.812	4.779	4.793	4.69133	4.782	4.77167	5.28833	4.77733	4.95433	4.801	4.59733	4.81067	5.219	4.60267	4.58067	5.265	3.948	4.384	3.98133	4.23967	4.22333	4.418	4.27767	4.25733	4.016	4.00933	3.91967
ASS1	3.1565	3.2205	3.345	3.021	3.2715	2.605	3.57	3.49	2.8755	3.257	3.2045	3.2115	3.164	2.6465	3.483	2.8255	3.3745	3.2015	3.134	2.7845	2.758	2.793	2.8395	2.767	2.8125	2.902	2.932	3.0035	3.3625	2.9845	3.0425	2.699	3.3225	2.777	2.9015	2.797	2.9145	2.6765	2.1155	2.327	2.389	2.354	2.327	2.159	2.1995	2.7805	2.412	2.2225	2.606
ASTE1	6.509	6.132	6.397	6.411	6.527	5.352	6.552	6.901	6.3	6.276	6.625	6.548	6.547	6.598	6.687	6.476	6.89	6.502	6.707	7.13	7.273	7.129	6.69	7.008	6.874	7.192	6.983	7.122	7.042	6.796	6.908	6.722	7.649	7.052	6.937	7.228	6.9	7.202	6.961	6.651	6.714	6.614	6.579	6.564	6.948	6.474	6.863	7.004	6.26
ASTL	2.93	2.652	2.548	2.73	2.411	3.058	2.643	2.51	2.957	2.834	2.7	2.723	2.81	2.856	2.778	2.675	2.308	2.845	2.734	3.291	3.126	3.258	3.226	3.139	3.107	3.106	3.559	2.982	3.041	3.182	3.216	2.984	3.046	3.207	3.22	3.013	3.142	2.95	2.227	2.507	2.587	2.407	2.52	2.695	2.698	2.695	2.702	2.347	2.417
ASTN1	3.085	2.8885	2.995	3.0155	2.6965	2.7265	2.6775	2.7895	2.7245	2.918	2.738	2.586	2.854	2.641	2.672	3.067	2.644	2.738	2.4245	3.245	3.115	2.993	3.254	3.223	3.255	3.218	3.21	3.525	3.246	3.2375	3.2685	3.2895	3.1285	3.1915	3.209	3.24	3.2725	3.268	2.594	2.684	2.687	2.7205	2.746	2.7665	2.751	2.655	2.5255	2.572	2.683
ASTN2	3.714	3.666	3.864	3.752	3.57767	3.369	3.73333	3.79433	4.00933	3.80833	3.665	3.817	3.83167	3.60767	4.00167	3.46133	3.65767	3.40333	3.76533	4.303	4.26567	4.01767	4.058	4.06633	3.744	4.10167	3.94133	4.016	4.194	4.04033	4.397	3.95267	3.89667	4.02433	4.07833	4.17567	4.143	3.95233	3.82833	3.538	3.48033	3.50167	3.38	3.449	3.92767	3.471	3.41533	3.51333	3.70533
ASXL1	5.33486	5.149	5.40243	5.41271	5.33186	6.68414	5.50557	5.44486	5.50114	5.468	5.28557	5.40629	5.38343	5.23114	5.44829	5.56343	5.38771	5.06943	5.47586	5.95143	5.95229	5.84143	5.82814	6.01629	5.84086	5.79943	5.96171	6.19886	5.83914	5.78257	5.93	5.77986	6.065	6.00629	5.96414	5.88457	5.61257	5.78486	5.55814	5.12771	5.20514	5.26357	5.15729	5.24314	5.368	5.36629	5.183	5.29786	5.317
ASXL2	6.283	6.263	5.8958	5.9468	5.999	5.504	6.1552	6.006	5.8292	6.1544	5.998	6.1066	6.0274	5.9462	5.9954	6.1734	6.038	5.8526	6.1584	6.3154	6.2796	6.2402	6.3572	6.1552	6.6744	6.4174	6.5194	6.2652	6.3582	6.5698	6.4776	6.0044	6.5264	6.2516	6.3826	6.133	6.1422	6.2558	5.9348	5.911	5.8524	6.1008	5.7896	5.9166	5.5048	6.3104	5.6852	5.7162	5.812
ASXL3	2.3255	2.406	2.5345	2.6165	2.498	2.4015	2.534	2.4575	2.502	2.635	2.46	2.5625	2.308	2.427	2.4305	2.598	2.4625	2.583	2.4045	2.9565	2.877	2.7675	3.144	2.923	2.974	2.802	3.0075	2.8555	2.9895	2.8735	2.9015	2.9165	2.9525	2.929	2.864	2.7465	3.019	2.941	2.4265	2.271	2.4425	2.439	2.638	2.5335	2.543	2.457	2.607	2.5005	2.532
ASZ1	2.407	2.344	2.399	2.8715	2.1305	2.6035	2.305	2.4885	2.6315	2.402	2.489	2.2685	2.313	2.263	2.1575	2.3285	2.201	2.3895	2.319	2.988	2.9195	2.82	2.9185	2.908	2.8725	2.9445	2.7815	2.942	2.881	2.791	2.7455	2.8855	2.7795	2.9615	2.9285	2.8565	3.0195	3.266	2.8405	2.4555	2.707	2.606	2.6345	2.57	2.5305	2.4435	2.7065	2.6665	2.5615
ATAD1	5.56325	5.40875	5.78825	5.337	5.73	5.39325	5.946	6.29575	5.54925	5.659	5.81975	6.05225	5.4305	5.953	5.6755	5.773	6.07525	5.79175	5.594	6.11925	6.429	6.703	6.2455	6.3445	6.04925	6.35	6.03525	6.321	6.1165	6.01475	5.77325	6.819	6.32325	6.24775	6.35025	6.224	5.94525	6.3425	6.86175	5.65025	6.3875	5.97	6.4365	6.1125	6.0755	5.29775	6.295	6.93925	6.7045
ATAD2	3.727	4.3445	4.672	3.067	4.207	5.0715	4.74	5.013	4.2555	4.3385	4.688	4.846	4.0865	4.332	4.6505	4.4445	4.8805	5.105	4.4455	5.349	5.7635	5.928	5.2365	5.9985	4.6895	5.3275	5.231	5.6795	5.1055	5.701	5.159	6.2295	6.0535	5.8535	5.575	5.474	4.7375	5	6.3985	4.3535	5.2505	4.393	5.7505	4.6875	6.0465	4.1955	5.486	5.933	5.7935
ATAD2B	7.3935	7.546	7.6055	7.3845	7.929	7.736	7.8185	8.0485	6.992	7.41	7.351	7.8285	6.746	7.994	6.9255	7.332	7.868	7.9375	7.8495	8.244	8.546	8.671	8.432	8.329	7.988	8.171	8.1265	8.394	7.7265	8.284	8.133	8.6585	8.4365	8.554	8.1875	8.328	8.17	8.216	9.104	8.075	8.573	8.0345	8.6005	8.215	8.7475	7.6655	8.4285	9.1485	8.7845
ATAD3A	6.1615	6.385	6.5905	6.784	6.4105	6.185	6.5075	6.444	6.794	6.4365	6.572	6.6675	6.754	6.342	6.3925	6.321	6.348	6.168	6.588	6.725	6.6965	6.184	6.6285	6.7065	6.746	6.6655	6.946	6.606	7.0435	6.9425	6.7385	6.5665	6.5975	6.635	6.7245	6.5455	6.4895	6.72	5.1765	5.6045	5.5825	5.738	5.346	5.6005	5.6265	5.938	5.6205	4.815	5.2815
ATAD3A /// ATAD3B /// LOC732419	5.42	5.627	6.068	5.806	5.482	5.854	5.533	5.663	6.206	5.325	5.452	5.722	5.955	5.677	5.45	5.415	5.834	5.574	5.978	6.27	6.301	6.242	6.088	6.31	5.699	6.228	6.168	5.848	6.49	6.265	6.472	6.618	6.201	6.185	6.312	6.292	6.283	6.177	3.992	5.108	5.348	5.01	4.908	5.117	5.655	5.56	5.372	4.794	4.916
ATAD3B /// LOC732419	4.188	4.102	4.212	4.6	4.138	4.63	4.137	4.403	4.907	4.095	4.152	4.174	4.372	4.002	4.19	4.093	4.47	4.109	4.157	5.178	5.395	5.056	5.107	5.3	4.836	5.468	5.148	4.874	5.364	5.142	5.315	5.154	5.417	5.119	5.32	5.298	5.021	4.996	3.266	3.747	3.531	3.54	3.474	3.455	3.914	3.901	3.584	3.532	3.144
ATAD3C	2.612	2.6845	2.8705	2.8725	2.6165	2.9075	2.686	2.8105	2.77	2.6095	2.8545	2.5065	2.7415	2.784	2.6425	2.594	2.672	2.685	2.968	3.145	2.995	3.064	3.028	3.265	3.0745	2.977	3.1515	3.176	3.0605	3.071	3.104	3.036	3.039	3.1375	3.241	2.9815	3.082	3.2435	2.586	2.4135	2.568	2.3535	2.548	2.5565	2.7385	2.531	2.63	2.356	2.4525
ATAD5	6.019	5.608	5.322	5.197	5.675	4.808	5.522	5.35	5.001	4.972	5.361	5.644	5.406	5.739	6.044	5.75	5.348	5.989	4.759	5.967	6.145	5.876	5.556	6.2	6.413	5.791	6.264	5.954	6.501	5.887	5.983	6.226	6.461	6.479	5.403	6.425	5.794	5.921	5.101	6.031	5.787	5.836	5.377	6.281	6.174	5.933	5.374	6.123	5.998
ATCAY	2.921	2.75	2.8292	3.135	2.8304	2.9858	2.64	2.8186	2.78	2.7846	2.8332	2.7414	2.756	2.7674	2.6732	2.697	2.748	2.6004	2.728	3.23	3.0792	3.1924	3.2312	3.175	3.0236	3.0634	3.1166	3.067	3.1902	3.1396	3.2176	3.0562	3.129	3.1252	3.2002	3.1486	3.364	3.2686	2.5026	2.5698	2.6428	2.5538	2.5356	2.4804	2.488	2.6676	2.6364	2.5544	2.4778
ATE1	4.37	4.131	3.512	4.132	3.779	4.696	4.135	3.518	4.602	3.888	4.046	3.514	4.057	3.986	3.98	4.263	3.971	4.008	3.848	4.564	3.787	4.217	4.221	3.989	4.062	3.999	3.925	3.725	4.308	4.589	4.218	3.703	4.534	3.784	4.036	4.886	4.072	3.839	4.019	3.649	3.664	3.751	3.385	3.668	3.182	3.564	4.035	4.008	4.295
ATF1	5.524	5.75733	5.69167	5.27533	5.51167	4.85067	5.94633	6.26633	5.574	5.408	5.46933	5.95467	5.49167	5.93733	5.838	5.77633	5.928	6.05133	5.411	6.27967	6.502	6.21367	6.21067	6.65433	6.05833	6.093	6.035	6.66433	5.80967	6.41067	6.264	6.57133	6.13067	6.546	6.08367	6.39033	6.00033	6.05667	6.82133	5.678	5.82567	6.251	5.745	5.77567	6.03267	5.619	5.6	6.434	6.572
ATF2	5.0606	5.0052	4.7196	4.8074	4.928	5.359	5.0784	5.1074	4.8538	4.605	5.161	4.9368	5.0194	5.1076	4.742	5.3684	4.9868	5.0506	5.0226	5.4068	5.3008	5.3226	5.2086	5.135	5.431	5.2942	5.1268	5.3428	5.3134	5.2828	5.0698	5.2848	5.3968	5.1356	5.0472	5.2532	5.0922	5.5594	5.2136	5.2396	5.3424	5.162	5.6554	5.0008	5.0844	4.7286	4.866	5.4842	5.3174
ATF3	2.56029	2.75957	2.71357	2.81271	2.703	3.12729	2.66014	2.525	2.46714	2.83186	2.57929	2.58843	2.66786	2.54971	2.65314	2.67614	2.62057	2.60643	2.66014	3.27757	3.19014	3.49357	3.36929	3.29629	3.22843	3.15814	3.34257	3.15571	3.396	3.42371	3.34357	3.17471	3.35557	3.21743	3.40143	3.21757	3.33829	3.23871	2.36671	2.65671	2.57171	2.47057	2.45943	2.65657	2.64771	2.51114	2.528	2.58	2.319
ATF4	10.371	10.245	10.507	10.422	10.213	11.018	10.566	10.658	10.621	10.466	10.388	10.474	10.363	10.468	10.351	10.303	10.528	10.25	10.157	10.365	10.728	10.686	10.524	10.951	10.611	10.826	10.465	10.742	10.809	10.68	10.567	10.737	10.721	10.71	10.69	10.701	10.542	11.007	10.469	10.688	10.65	10.689	10.776	10.613	10.839	10.632	10.772	10.878	10.615
ATF5	4.04725	4.11925	4.022	3.92	4.05875	4.2695	3.96275	4.0145	4.13425	4.187	3.93375	3.928	4.47425	3.7675	4.07925	3.9985	3.76375	3.85925	3.67275	4.0945	4.34925	4.56975	4.0625	4.0075	3.9035	4.0755	4.17775	3.94	4.11	4.09925	4.09775	3.84	4.14525	3.9255	3.91375	3.865	4.0365	4.01175	3.07225	3.22525	3.196	3.789	2.967	3.38375	2.87825	3.69375	2.97025	3.01325	3.00175
ATF6	6.98433	7.16833	6.355	7.01833	6.35967	6.91833	6.69467	6.268	6.802	6.21167	6.76733	6.08767	6.757	6.878	6.60133	6.92833	6.16067	6.62367	6.62267	6.72333	6.83567	6.45633	7.126	6.136	7.169	6.50367	6.926	6.82	6.973	7.10267	6.95033	6.875	6.43533	6.64633	6.362	6.90267	7.08933	7.26733	5.93133	6.62067	7.01533	6.618	6.73133	6.659	6.12267	6.912	6.71233	6.12933	6.18733
ATF6B	6.092	6.4565	6.431	6.2475	6.5245	6.259	6.3	6.093	6.511	6.369	6.298	6.276	6.3945	6.081	6.201	6.2625	6.2265	5.8415	6.223	6.2185	5.9415	5.8755	6.0485	5.8955	6.316	6.176	6.1685	5.927	6.363	6.041	6.116	5.925	6.146	5.9945	6.0955	6.1215	6.3225	6.0555	4.598	5.2685	5.1725	5.693	5.333	5.4695	4.7965	5.636	5.3605	5.029	5.296
ATF6B /// TNXB	4.933	5.389	4.623	5.251	5.257	4.572	5.039	5.149	5.1	5.391	5.059	5.019	5.406	5.029	5.017	4.947	4.805	4.916	5.259	4.923	4.233	4.615	4.527	4.694	4.643	4.509	4.46	4.477	4.473	4.373	4.541	4.306	4.538	4.32	4.39	4.466	4.468	4.575	2.874	3.247	3.97	4.243	3.81	3.76	2.874	3.786	3.221	3.327	3.589
ATF7	4.1404	4.2634	4.0064	3.771	3.8538	3.9558	4.0466	4.0698	4.0236	3.9462	4.0174	3.7922	4.0406	4.0042	4.0746	4.21	4.0394	4.0518	3.9918	4.4794	4.2356	4.6548	4.3158	4.4582	4.656	4.4646	4.5218	4.4224	4.4296	4.5036	4.5068	4.4076	4.5762	4.449	4.4552	4.367	4.4218	4.2818	4.1066	3.7908	3.9852	3.9394	3.8372	3.827	4.108	4.0316	3.8026	3.9352	3.979
ATF7IP	6.61125	6.7195	6.124	6.4535	6.49275	6.396	6.50575	6.3575	6.26175	6.0785	6.39725	6.33875	6.54525	6.1945	6.68575	6.555	6.1405	6.21925	6.413	6.415	6.63075	6.586	6.58425	6.4855	7.2285	6.78675	6.9585	6.66825	7.07625	6.672	6.666	6.15025	7.2445	6.724	6.375	6.7265	7.006	6.72275	6.32125	6.6425	6.32	6.7385	5.90825	6.385	6.02725	6.63875	6.06775	6.0245	6.05025
ATF7IP2	5.30167	4.98933	5.16967	5.32167	5.19333	6.01	5.388	5.42433	5.41733	5.35967	5.437	5.87067	5.15833	5.454	5.14867	5.568	5.499	5.03667	5.495	5.46367	5.62267	5.58333	5.71067	5.79967	5.43833	5.97767	6.053	6.176	5.87	5.49567	5.722	6.251	6.00867	5.92833	5.97833	5.904	5.815	5.37	5.075	5.06367	5.01867	5.178	5.17367	5.44167	5.05133	5.223	5.69267	5.49333	5.27833
ATG10	2.718	3.096	3.0865	2.76	2.6415	2.8935	2.948	3.175	2.5355	2.709	2.856	2.632	3.077	2.674	2.858	2.7855	2.938	3.094	2.7455	3.5765	3.662	4.0305	4.279	4.3	4.0805	3.897	3.4645	3.9405	4.2025	4.276	3.6455	4.3785	4.126	3.839	3.671	3.834	3.741	3.8505	4.137	3.1495	3.3565	3.4015	3.0935	2.921	3.642	2.878	3.0265	3.173	4.156
ATG12	5.909	5.934	5.863	5.774	6.0155	5.877	5.901	5.9865	5.7065	5.993	6.0555	5.9675	5.8465	6.0155	5.809	5.836	5.904	6.0375	5.9025	6.429	6.3395	6.508	6.527	6.3965	6.374	6.423	6.332	6.5585	6.292	6.4835	6.442	6.322	6.4345	6.3315	6.4365	6.3145	6.5065	6.823	5.855	6.0525	6.017	6.0755	6.0515	6.0995	5.9445	5.9995	6.1525	6.222	6.129
ATG16L1	6.1765	6.248	6.3665	5.954	6.5435	6.72	6.5585	6.4985	6.457	6.3845	6.611	6.5465	6.2565	6.408	6.27	6.309	6.496	6.309	6.7975	6.242	6.2985	6.37	6.424	6.22	6.5425	6.3445	6.181	6.4535	6.468	6.2085	6.407	6.2945	6.398	6.2845	6.412	6.4025	6.387	6.326	5.9475	5.9965	6.1075	6.206	6.0045	6.256	6.159	6.1165	5.8615	6.0705	6.17
ATG16L2	7.567	7.46667	6.90033	7.37933	7.31167	7.568	7.437	6.972	7.992	6.667	7.34067	6.81867	7.39433	7.41533	7.07667	7.31433	6.714	7.09667	7.40833	7.15767	7.375	7.09933	7.42633	6.881	7.774	7.46	7.48133	7.055	7.67533	7.808	7.54867	7.43333	6.784	7.134	7.12933	7.67067	7.55933	8.09467	5.85633	7.014	6.984	6.42233	7.059	6.46633	6.69333	7.05133	6.538	6.16433	6.82
ATG2A	4.3445	4.66625	4.101	4.3565	4.65425	4.70925	4.44875	4.10575	5.00375	4.289	4.44925	4.23975	4.6975	4.1935	4.4415	4.49775	4.001	4.3385	4.42375	4.8485	4.86975	4.68475	4.94125	4.661	4.7935	4.921	4.99375	4.67975	4.90275	4.92575	5.046	4.6985	4.6485	4.8445	4.7775	4.96675	5.2005	4.6815	3.841	3.92525	3.47975	3.90025	4.22125	3.669	4.1815	4.1885	3.56125	3.43775	3.7735
ATG2B	5.47475	5.8295	5.63025	5.412	5.84875	5.82475	5.78325	5.93275	5.666	5.6135	5.77525	6.12075	5.6605	5.841	5.54625	5.80375	5.869	5.69675	6.0595	6.194	6.331	6.201	6.2735	6.1945	5.92275	6.3175	6.248	6.3745	5.91775	5.99525	6.1465	6.2775	6.18975	6.40775	6.184	6.3065	6.2905	6.14275	5.6165	5.5725	5.885	5.7895	5.712	5.60125	5.70225	5.409	5.685	5.79375	5.85775
ATG3	7.65117	7.808	7.69433	7.4865	7.84917	7.9575	7.72083	7.98533	7.625	7.70367	7.8605	7.713	7.66017	7.9575	7.5785	7.88067	7.80617	7.93167	7.90683	8.49783	8.58883	8.68383	8.62167	8.18533	8.70817	8.23533	8.58133	8.47933	8.05333	8.65417	8.47033	9.03367	8.3085	8.518	8.252	8.33333	8.5485	8.624	8.6995	8.471	8.77167	7.95183	8.64917	8.21167	8.50317	7.86283	8.354	8.8235	8.51067
ATG4A	5.5015	5.524	5.617	5.3595	5.68	5.373	5.7995	5.736	5.756	5.814	5.667	5.787	5.5815	5.7765	5.9555	5.8165	5.821	5.706	5.8315	6.149	6.5015	6.369	6.241	6.422	5.669	6.2675	6.2225	6.15	6.2395	6.2235	6.3935	6.2595	6.471	6.373	5.8485	6.154	5.8935	6.4545	6.984	6.007	6.392	5.833	5.7545	5.998	6.201	5.647	6.2955	6.478	6.482
ATG4B	5.69433	5.7515	5.71817	5.5745	5.67683	6.16367	5.60167	5.58633	6.13167	5.69567	5.60067	5.49233	5.93367	5.3425	5.6965	5.54767	5.4755	5.39767	5.68167	5.87833	6.44017	6.022	6.20733	6.121	6.31417	6.46	6.18517	6.0555	6.50533	6.30383	6.37783	5.7535	6.17217	6.231	6.23567	6.3955	6.0325	6.16233	4.9545	5.3	4.97767	5.292	4.98233	5.20733	5.12117	5.65467	5.08817	4.67667	4.99533
ATG4C	4.974	5.425	5.664	4.231	5.528	5.182	5.449	5.946	4.805	4.84	5.449	5.61	5.411	5.542	5.182	5.296	6.083	5.43	5.513	6.078	6.171	6.103	5.763	6.008	5.88	5.955	5.549	6.051	5.668	6.115	5.711	6.252	6.24	6.23	5.984	6.049	5.42	5.601	6.452	5.697	5.994	5.9	6.083	5.877	6.275	5.525	6.344	6.52	6.035
ATG4C /// CTR9	5.355	5.323	5.69	4.946	5.048	3.755	5.584	6.11	4.682	4.922	4.971	5.557	4.832	5.717	4.92	5.591	5.918	5.924	5.488	6.545	6.897	6.7	6.453	6.599	6.312	6.398	6.073	6.709	5.712	5.651	6.407	7.227	5.858	6.914	5.927	6.718	6.458	6.731	7.191	5.118	6.177	5.645	6.165	5.591	6.167	5.015	5.8	6.762	6.319
ATG4D	3.99967	3.973	4.221	3.94967	4.022	4.33233	4.14067	3.89033	4.03833	4.01333	3.981	4.05033	4.15633	3.966	4.13867	3.92233	3.96333	4.068	3.95733	4.438	4.142	4.18233	4.12533	4.01833	4.11933	4.08833	4.23567	3.91367	4.12833	4.273	4.14833	4.00133	4.17767	3.95567	4.25067	4.157	4.06367	4.15533	3.268	3.458	3.46467	3.283	3.56967	3.193	3.655	3.69967	3.44633	3.13033	3.24867
ATG5	5.24167	5.37267	5.48867	5.03667	5.836	6.06867	6.144	6.19667	5.114	5.67	6.033	6.04167	5.474	6.09567	5.44133	5.437	6.256	5.83	5.69233	6.50167	6.58833	6.65167	6.20067	6.34767	5.927	6.60167	6.25567	6.746	5.73033	5.773	5.77133	7.14967	6.29433	6.74333	5.948	5.93933	6.03167	6.694	7.89067	6.31833	7.032	6.15433	6.97567	6.27267	7.121	5.37	7.13833	7.51367	7.341
ATG7	6.39367	6.32333	6.21967	6.319	6.61767	5.40433	6.19133	6.332	6.415	6.50567	6.32933	6.063	6.46367	6.173	6.31033	6.33567	6.26133	6.22	6.361	6.094	6.17733	6.092	6.51167	6.05767	6.86	6.23467	6.271	6.07067	6.44367	6.709	6.44133	5.817	5.81133	6.093	6.21867	6.22467	6.24167	6.30867	4.81767	6.16933	5.59667	5.65767	5.29067	5.95833	5.29633	6.371	5.56067	5.036	5.361
ATG9A	5.6516	5.664	5.682	5.5236	5.5538	5.9596	5.3	5.2536	5.987	6.1246	5.7348	5.3752	5.95	5.518	5.7416	5.6606	5.344	5.7826	5.6596	5.8702	5.5276	6.0134	5.4764	5.4128	5.6974	5.5866	5.4878	5.2808	5.8984	5.7186	5.6216	5.3908	5.3628	5.4286	5.5534	5.5078	5.5572	5.408	4.5954	5.1002	4.6366	4.7052	4.8764	4.7914	4.8144	5.155	4.7082	4.4702	4.6074
ATG9B	4.16325	3.26475	4.0225	4.0795	3.689	3.53575	3.6425	3.88525	4.24625	3.87875	3.93675	4.03	4.1555	3.98525	4.0025	4.15925	4.1335	4.06275	3.80675	4.0435	4.464	4.1375	4.2765	3.964	4.0895	4.2495	4.2455	4.08575	4.8195	4.43025	4.11175	4.10525	3.807	4.4805	4.5065	4.539	3.98075	3.79975	3.747	3.51125	3.0995	3.73175	3.4275	3.6235	3.80475	3.47	3.606	3.46525	3.48175
ATHL1	7.301	6.702	6.502	6.9	6.657	6.835	6.365	6.42	7.601	6.408	6.969	6.362	6.587	6.653	6.34	6.425	6.295	6.462	6.346	6.397	6.612	6.346	6.537	6.225	7.16	7.156	6.87	6.577	7.261	7.403	7.207	6.695	6.697	6.701	6.9	6.932	6.54	7.241	5.661	6.221	6.124	6.537	6.442	5.857	6.047	6.854	5.452	5.827	6.129
ATIC	8.486	7.802	8.257	8.653	7.713	7.418	7.885	8.119	8.209	8.32	7.853	8.264	8.315	7.966	8.357	8.072	8.523	7.695	8.127	8.212	8.297	8.183	8.087	8.537	7.938	8.193	8.368	8.567	8.652	8.134	8.247	7.993	8.52	8.325	8.339	8.154	8.041	7.957	7.676	7.58	7.414	7.988	7.312	7.989	7.385	8.189	7.765	7.372	7.548
ATL1	2.89733	3.21333	3.12567	3.201	2.84467	3.41	3.32867	3.43267	3.111	3.61133	3.147	3.23	3.22033	3.30667	3.158	3.50933	3.39233	3.43067	3.447	4.01567	4.05067	4.22967	4.11967	3.988	3.76067	3.84733	4.01967	4.22467	3.81933	3.96833	3.94267	4.01967	4.40567	4.20367	4.03933	3.90533	3.79667	4.32167	4.93467	3.54733	3.628	3.366	3.22167	3.427	4.26267	3.33167	3.70333	3.75033	3.726
ATL2	5.45167	5.749	5.69833	5.349	6.10933	5.81867	5.93533	6.12533	5.73967	5.26467	5.74267	6.045	5.402	5.99933	5.56433	6.05267	6.004	6.02867	5.73033	5.649	6.314	6.221	6.154	6.15033	5.959	5.88867	5.695	6.016	5.61933	5.99633	6.04633	6.62467	6.10633	6.24867	5.93467	6.02567	5.85767	6.28233	6.504	6.138	6.39567	6.21033	6.24133	6.181	6.39267	5.17967	6.297	7.17033	6.647
ATL3	7.216	7.0845	7.4485	6.7895	7.1165	7.1765	7.1155	7.3345	6.66	7.2305	7.156	7.189	7.109	7.211	7.1985	7.2065	7.3295	7.04	7.5375	8.2765	8.0395	8.099	7.9185	8.108	7.621	7.6885	7.9135	7.925	7.822	7.8375	7.865	7.961	7.946	7.855	8.0505	7.7785	7.6225	8.0225	7.6555	7.4305	7.769	7.5245	7.4915	7.621	7.512	7.191	7.677	7.3395	7.5445
ATM	6.4602	6.3676	6.0958	6.4758	6.5574	6.3894	6.4172	6.245	6.3778	6.3672	6.3324	6.4792	6.1584	6.4474	6.5392	6.656	6.4308	6.2928	6.058	6.4304	6.6638	6.5382	6.299	6.4494	6.4328	6.7054	6.8688	6.8972	6.7082	6.2206	6.4794	6.5952	7.035	6.618	6.4194	6.8484	6.3568	6.6658	6.467	6.453	6.5078	6.8832	6.7814	6.5642	6.7046	6.7004	6.4698	6.9214	6.8964
ATMIN	7.264	7.247	7.506	7.102	7.358	7.788	7.5355	7.557	7.167	7.406	7.3305	7.6365	7.272	7.317	7.445	7.248	7.7265	7.089	7.328	8.176	8.3195	8.174	8.149	8.299	7.849	7.9865	8.0765	8.155	7.9265	7.748	7.878	8.155	8.5855	8.322	8.2025	7.969	8.1135	7.8725	8.013	7.402	7.618	7.6525	7.4615	7.6245	7.8025	7.435	7.446	7.595	7.547
ATN1	3.8045	3.3455	3.552	3.4275	3.4735	3.5915	3.4635	3.5275	3.7985	3.423	3.5565	3.387	3.4855	3.486	3.9425	3.373	3.543	3.3985	3.883	3.6885	3.5595	3.8395	3.616	3.768	3.511	3.5665	3.723	3.791	3.656	3.6105	3.7645	3.5875	3.7755	3.6625	3.907	3.522	3.563	3.5325	2.689	3.1305	2.871	3.078	2.955	2.935	2.932	3.0625	2.8475	2.8925	2.938
ATOH1	2.425	2.536	2.725	2.257	2.287	2.398	2.322	2.65	2.561	2.485	2.723	2.264	2.543	2.74	2.365	2.599	2.462	2.31	2.698	2.545	2.952	2.787	2.945	2.947	2.914	2.729	2.791	2.971	2.738	3.065	2.895	2.943	3.034	2.929	3.199	2.989	3.104	3.146	2.38	2.446	2.567	2.415	2.46	2.761	2.559	2.759	2.64	2.524	2.529
ATOH7	2.578	2.4475	2.1245	2.377	2.323	2.461	2.11	2.1195	2.3625	2.146	2.199	2.1975	2.2665	2.1945	2.246	2.236	2.1965	2.0925	2.334	2.8065	2.972	2.7275	2.8415	2.8225	2.8745	2.7365	2.7875	2.7505	2.7915	2.7885	2.767	2.945	2.852	2.7475	2.8675	2.8965	2.89	2.8655	2.502	2.271	2.323	2.297	2.3825	2.249	2.489	2.2325	2.3505	2.3205	2.289
ATOH8	2.8995	3.0505	2.83	2.669	2.3315	2.58	2.729	2.7545	2.952	2.5865	2.5165	2.3095	2.428	2.648	2.85	2.5585	2.834	2.513	2.4835	3.3635	3.761	3.551	3.526	3.0445	3.6845	3.449	3.364	3.2835	3.322	3.8115	4.1265	3.1345	3.4115	3.1375	3.7435	3.8225	3.581	3.4755	2.3835	2.924	2.7245	3.005	2.5945	2.7745	2.5	3.0985	2.778	2.645	2.4175
ATOX1	8.9075	8.8815	9.2665	8.9175	8.9445	8.878	8.76	8.842	9.2855	8.988	8.843	8.7515	9.3945	8.69	8.884	8.8785	8.9775	8.779	9.0665	9.603	9.422	9.5455	9.5605	9.707	9.656	9.3775	9.5875	9.33	9.8515	9.755	9.5745	9.347	9.301	9.2015	9.757	9.375	9.526	9.7035	8.2705	9.315	8.737	8.734	8.8815	8.7805	9.045	9.2485	8.4675	8.21	8.261
ATP10A	4.272	3.934	4.25625	4.442	3.989	4.20475	3.8455	4.01025	4.14025	3.99525	4.17525	4.14625	4.03675	4.1845	3.86675	4.1965	4.06925	3.76025	3.8965	4.4085	4.39225	4.35775	4.38425	4.50175	4.16525	4.6375	4.48925	4.1335	4.5995	4.22375	4.429	4.22025	4.56125	4.635	4.621	4.46925	4.52875	4.48725	3.23175	3.60725	3.26125	3.6365	3.3305	3.52625	3.33875	3.72575	3.64375	3.435	3.11225
ATP10B	2.347	2.184	2.25914	2.37757	2.28157	2.34671	2.15943	2.247	2.32986	2.24943	2.30614	2.15443	2.25714	2.25686	2.17314	2.24829	2.16686	2.203	2.303	2.90586	2.86514	2.83171	2.97757	2.93043	2.884	2.88271	2.94186	2.94529	2.844	2.90314	2.90543	2.89086	2.87	2.87257	3.01329	2.86571	2.958	2.99686	2.45257	2.42943	2.42586	2.31829	2.36343	2.45043	2.43057	2.39186	2.43614	2.398	2.325
[truncated: 18,847 more rows]
[truncated: 110 more columns]
