# Supplementary material for: Exploration of Potential Integrated Models of N6-Methyladenosine Immunity in Systemic Lupus Erythematosus by Bioinformatic Analyses
Source: Front Immunol. 2022 Feb 7;12:752736. doi: 10.3389/fimmu.2021.752736 (PMC8859446; doi:10.3389/fimmu.2021.752736)
Supplement: Supplementary Table 5 — Clinical information of GSE110169 dataset. [file Table_5.xls]

## Sheet: Sheet1
id	group	Sex
GSM2981057	Normal	Female
GSM2981058	Normal	Male
GSM2981059	Normal	Male
GSM2981060	Normal	Female
GSM2981061	Normal	Male
GSM2981062	Normal	Female
GSM2981063	Normal	Female
GSM2981064	Normal	Male
GSM2981065	Normal	Male
GSM2981066	Normal	Male
GSM2981067	Normal	Female
GSM2981068	Normal	Male
GSM2981069	Normal	Male
GSM2981070	Normal	Female
GSM2981071	Normal	Female
GSM2981072	Normal	Female
GSM2981073	Normal	Female
GSM2981074	Normal	Female
GSM2981075	Normal	Female
GSM2981121	Normal	Male
GSM2981122	Normal	Female
GSM2981123	Normal	Female
GSM2981124	Normal	Male
GSM2981126	Normal	Male
GSM2981133	Normal	Male
GSM2981135	Normal	Male
GSM2981136	Normal	Female
GSM2981140	Normal	Female
GSM2981141	Normal	Female
GSM2981142	Normal	Male
GSM2981143	Normal	Male
GSM2981144	Normal	Female
GSM2981145	Normal	Female
GSM2981147	Normal	Male
GSM2981149	Normal	Female
GSM2981155	Normal	Female
GSM2981161	Normal	Male
GSM2981163	Normal	Female
GSM2981198	Normal	Female
GSM2981199	Normal	Female
GSM2981202	Normal	Female
GSM2981203	Normal	Male
GSM2981204	Normal	Female
GSM2981205	Normal	Female
GSM2981207	Normal	Female
GSM2981208	Normal	Male
GSM2981209	Normal	Female
GSM2981210	Normal	Female
GSM2981211	Normal	Female
GSM2981212	Normal	Female
GSM2981213	Normal	Female
GSM2981214	Normal	Female
GSM2981222	Normal	Male
GSM2981226	Normal	Female
GSM2981234	Normal	Male
GSM2981244	Normal	Female
GSM2981253	Normal	Female
GSM2981257	Normal	Female
GSM2981258	Normal	Female
GSM2981259	Normal	Female
GSM2981260	Normal	Female
GSM2981261	Normal	Female
GSM2981262	Normal	Male
GSM2981263	Normal	Female
GSM2981265	Normal	Female
GSM2981266	Normal	Female
GSM2981268	Normal	Female
GSM2981269	Normal	Female
GSM2981270	Normal	Female
GSM2981271	Normal	Male
GSM2981273	Normal	Female
GSM2981274	Normal	Female
GSM2981275	Normal	Female
GSM2981277	Normal	Female
GSM2981282	Normal	Female
GSM2981284	Normal	Female
GSM2981288	Normal	Female
GSM2981077	SLE	Female
GSM2981078	SLE	Female
GSM2981079	SLE	Female
GSM2981080	SLE	Female
GSM2981082	SLE	Female
GSM2981083	SLE	Female
GSM2981084	SLE	Female
GSM2981085	SLE	Female
GSM2981089	SLE	Female
GSM2981090	SLE	Female
GSM2981094	SLE	Female
GSM2981095	SLE	Female
GSM2981098	SLE	Male
GSM2981099	SLE	Female
GSM2981100	SLE	Female
GSM2981104	SLE	Female
GSM2981105	SLE	Female
GSM2981106	SLE	Male
GSM2981107	SLE	Female
GSM2981112	SLE	Female
GSM2981113	SLE	Male
GSM2981114	SLE	Female
GSM2981115	SLE	Female
GSM2981119	SLE	Female
GSM2981120	SLE	Female
GSM2981131	SLE	Female
GSM2981132	SLE	Female
GSM2981137	SLE	Female
GSM2981138	SLE	Female
GSM2981139	SLE	Female
GSM2981146	SLE	Female
GSM2981152	SLE	Female
GSM2981154	SLE	Female
GSM2981158	SLE	Female
GSM2981160	SLE	Female
GSM2981162	SLE	Female
GSM2981167	SLE	Female
GSM2981168	SLE	Female
GSM2981172	SLE	Male
GSM2981174	SLE	Female
GSM2981176	SLE	Female
GSM2981179	SLE	Male
GSM2981183	SLE	Female
GSM2981184	SLE	Female
GSM2981185	SLE	Female
GSM2981186	SLE	Female
GSM2981188	SLE	Female
GSM2981190	SLE	Female
GSM2981192	SLE	Male
GSM2981193	SLE	Male
GSM2981195	SLE	Female
GSM2981196	SLE	Male
GSM2981197	SLE	Female
GSM2981201	SLE	Female
GSM2981206	SLE	Female
GSM2981217	SLE	Female
GSM2981223	SLE	Female
GSM2981224	SLE	Female
GSM2981242	SLE	Male
GSM2981243	SLE	Female
GSM2981245	SLE	Male
GSM2981246	SLE	Female
GSM2981249	SLE	Male
GSM2981251	SLE	Female
GSM2981264	SLE	Male
GSM2981267	SLE	Female
GSM2981272	SLE	Female
GSM2981276	SLE	Female
GSM2981279	SLE	Female
GSM2981280	SLE	Female
GSM2981281	SLE	Female
GSM2981283	SLE	Female
GSM2981286	SLE	Female
GSM2981289	SLE	Female
GSM2981290	SLE	Female
GSM2981291	SLE	Male
GSM2981293	SLE	Female
GSM2981294	SLE	Female
GSM2981295	SLE	Female
GSM2981296	SLE	Female
GSM2981297	SLE	Female
GSM2981298	SLE	Female
