# Supplementary material for: Exploration of Potential Integrated Models of N6-Methyladenosine Immunity in Systemic Lupus Erythematosus by Bioinformatic Analyses
Source: Front Immunol. 2022 Feb 7;12:752736. doi: 10.3389/fimmu.2021.752736 (PMC8859446; doi:10.3389/fimmu.2021.752736)
Supplement: Supplementary Table 6 — Datas of the gene expression of GSE72509. [file Table_6.xlsx]

## Sheet: normalized microarray dataset
SYMBOL	GSM1863633	GSM1863634	GSM1863635	GSM1863636	GSM1863637	GSM1863638	GSM1863639	GSM1863640	GSM1863641	GSM1863642	GSM1863643	GSM1863644	GSM1863645	GSM1863646	GSM1863647	GSM1863648	GSM1863649	GSM1863650	GSM1863651	GSM1863652	GSM1863653	GSM1863654	GSM1863655	GSM1863656	GSM1863657	GSM1863658	GSM1863659	GSM1863660	GSM1863661	GSM1863662	GSM1863663	GSM1863664	GSM1863665	GSM1863666	GSM1863667	GSM1863668	GSM1863669	GSM1863670	GSM1863671	GSM1863672	GSM1863673	GSM1863674	GSM1863675	GSM1863676	GSM1863677	GSM1863678	GSM1863679	GSM1863680	GSM1863681
3126	30.3	45.9	63	15.6	27.6	18.1	61.6	57.4	71.3	127	51.3	62.8	81	59.5	49.5	47.1	121	57.9	167	53.1	248	60.6	42.7	38	17.8	19.9	43	42.2	97.9	64.4	59.6	28.2	187	20.6	64.9	92.8	97.2	55.9	20.9	35.1	22.9	44.4	66	32.6	16	31.9	53	18.7	68.1
23117	0.0503	0.0731	0.118	0.0992	0.118	0.0583	0.082	0.0954	0.16	0.0379	0.15	0.0734	0.0476	0.0731	0.173	0.138	0.0587	0.0822	0.15	0.15	0.0376	0.0742	0.158	0.0956	0.104	0.142	0.132	0.164	0.0634	0.168	0.157	0.0537	0.026	0.118	0.137	0.108	0.142	0.0236	0.084	0.0588	0.0558	0.107	0.118	0.0661	0.13	0.0504	0.123	0.0831	0.125
2021-03-01	6.91	8.85	7.3	6.64	4.63	8.83	8.94	9.37	9.09	11.9	6.49	8.86	6.08	5.64	7.65	6.6	6.91	5.97	6.86	6.2	4.62	9.68	9.03	10.7	6.47	9.39	7.47	13.5	10.4	8.72	8.45	8.7	8.17	5.13	10.9	10.1	14.1	7.52	4.04	12.2	8.01	13.6	7.59	14.7	9.7	14	13.4	6.69	9.46
2021-03-01	12.3	34	15	61.5	65.9	42.6	8.06	41.3	34.9	18	7.27	15.4	11.6	18.8	11.4	11.8	17	77.9	8.08	10.3	33.1	46.1	5.76	42.7	11.1	41.2	56.2	9.06	9.46	6.57	12.2	20	15.3	60.2	34.3	9.98	9.13	24.4	15.4	45	61.7	13.3	15.2	14.5	18.7	25.7	14.4	8.89	11.5
2021-03-02	93.7	76.1	44.8	35.8	60	40.8	19.7	31.6	21.1	27.1	25.8	36.5	51.8	67	34.3	33.5	43.4	59	41.7	30.5	70.8	22.7	25.7	24.4	24.9	59.3	42.1	21.1	26	31.3	23.4	51.5	53.3	42.7	31	31.9	23.6	35.2	41.3	29.6	30.4	13.5	33.6	19.9	27.1	37	24.1	53.5	26
2021-03-02	0.116	0.393	0.2	0.228	0.16	0.354	0.294	0.199	0.313	0.3	0.155	0.137	0.0822	0.673	0.154	0.283	0.156	0.344	0.0986	0.129	0.173	0.199	0.258	0.319	0.208	0.449	0.29	0.145	0.192	0.0792	0.323	0.0989	0.0597	0.196	0.249	0.138	0.0562	0.179	0.101	0.281	0.118	0.155	0.118	0.159	0.214	0.155	0.128	0.0403	0.207
2021-03-03	0.907	2.46	0.492	0.728	0.495	1.31	0.914	0.542	0.444	0.498	0.629	0.616	0.96	0.572	0.897	0.682	0.487	0.838	0.559	0.573	0.778	0.453	0.711	0.465	0.756	1.46	0.814	0.944	0.412	0.6	0.627	0.806	0.74	1.02	0.888	0.822	0.869	0.66	0.786	0.472	0.946	0.619	0.572	0.59	0.915	0.644	0.832	0.741	0.814
2021-03-04	0	0	0.00252	0.00852	0.0114	0	0.00743	0	0	0.0103	0.0025	0	0	0	0	0.00303	0	0	0.00437	0.00207	0	0.00252	0	0	0.00217	0	0.00467	0.00205	0.00235	0.00702	0.00673	0.00438	0	0	0.00384	0.00653	0	0.00275	0.00652	0	0.0114	0.00183	0.00492	0	0	0.00685	0.00477	0	0.00282
2021-03-05	6.34	6.64	5.78	8.85	8.17	9.52	6.18	6.87	6.84	6.14	4.72	5.57	4.98	4.8	5.54	4.98	6.51	8.28	4.41	4.52	5.54	6.61	5.21	7.21	6.17	10.8	12.4	4.95	5.1	4.62	5.05	5.64	5.13	7.76	9.25	5.09	4.74	5.82	6.2	9.95	8.3	5.28	4.58	5.7	6.83	5.51	5.3	5.34	5.05
2021-03-06	17.9	18.2	15.3	22.8	18.2	26.6	18.1	18.4	24.4	18.7	14.3	12.7	11.6	9.82	14.6	12	14.7	17.7	14.2	12.1	9.75	17	16.8	21.3	20.2	22.6	30.9	14.1	13.9	14.9	12.4	13	7.99	17.3	24.1	16.6	14.5	10.9	14.3	24.4	20.8	16.5	12.1	14.6	23.8	14	17	12.8	11.6
2021-03-07	33.8	44.1	27.9	49.9	42.6	61.4	31.1	41.7	44.3	35.3	25.8	32.3	19.3	21.1	31.8	23.9	32.4	34.4	20.4	19.4	15.4	41.5	35.1	47.7	39.4	53.4	79.6	30.8	29.4	25.5	25.3	30.2	24.8	41.1	56.7	34.3	25.6	23.6	25.6	67.5	54.2	35.2	23	30	47.9	31.3	28.7	28.7	24
2021-03-08	22.2	49.9	15.7	26.4	32.2	29.6	9.88	15.9	15.6	13.9	12.3	12.5	21.3	15.3	15.2	11.8	19.1	15.7	13.4	10.2	5.33	20.2	11.4	12.7	12.7	22.3	28.5	9.89	13.2	14.5	14.6	16.5	6.32	26.4	27	11.2	8.16	8.15	13.2	24.3	27.1	8.02	9.81	9.09	23.6	20.6	15.9	12.1	8.35
2021-03-09	5.59	5.04	6.9	7.58	4.94	5.11	7.52	6.05	6.2	4.93	8.04	7.87	8.14	10.2	8.07	9.6	6.14	3.95	11.2	10.1	7.77	4.75	8.83	4.81	8.84	5.25	3.34	7.94	6.74	7.23	7.64	5.82	5.87	5.18	5.33	8.68	5.87	9.18	8.13	3	4.24	6.1	6.57	6.32	5.56	4.02	5.92	9.6	6.52
2021-03-10	0	0.0177	0.0101	0.0399	0.00761	0.0116	0.0265	0.0397	0.0186	0.023	0.0502	0.0458	0.0845	0.0106	0.073	0.0528	0.069	0.0489	0.0409	0.0527	0.047	0.0203	0.0222	0.0741	0.0262	0.0452	0.0125	0.0413	0.0252	0.0423	0.018	0	0.0142	0.00717	0.0103	0.0306	0.0187	0.0331	0.0262	0.0148	0.0102	0.0196	0.00989	0.0502	0.0324	0.0413	0.0032	0.0334	0.0303
2021-03-11	0	0	0	0	0	0	0.0144	0	0	0	0	0	0	0	0	0	0	0	0.0127	0	0	0	0	0	0	0	0	0	0	0	0	0	0	0	0	0	0	0	0	0	0	0	0	0	0	0	0	0	0
2021-09-01	57.6	40.2	54.6	42.9	43.3	36.6	57.2	46.9	41.4	39.6	75.6	63.6	79.2	102	64.2	78.9	51.2	30.2	101	82.6	81.2	41.3	67.6	46.4	63	37.3	26.7	60.1	53.8	70.9	64.3	60.9	79.9	53.7	37.1	63	51.1	71.4	64.4	26.7	37.1	40.2	66	52.5	38.6	52.5	44.6	66.1	69.3
2021-09-02	39.8	33.6	38	30.3	40.1	30.3	28.6	28.9	24.4	32.6	28.7	31.3	24.2	24.9	30.4	27.6	34.4	34.3	31.2	31.8	24.8	32.8	31.3	29.2	29.2	31.1	36.2	34	32.6	29.5	32.6	26.2	28.5	25.4	26.4	27.8	30.3	24.6	26.6	35.3	34.3	38.6	30.8	28	29.9	26.2	33.6	27	28.4
2021-09-03	0.0168	0.0253	0.0676	0.0203	0.174	0.0289	0.0473	0.0283	0.0132	0.0426	0.0502	0.0626	0.0649	0.0304	0.0705	0.0551	0.0246	0.0349	0.0459	0.0574	0.0209	0.0313	0.0555	0.0216	0.0394	0.0276	0.0134	0.202	0.0876	0.0402	0.0451	0.046	0.0303	0.0256	0.0147	0.0468	0.0761	0.0368	0.0499	0.0282	0.0471	0.075	0.108	0.0448	0.0463	0.0131	0.073	0.0511	0.0594
2021-09-04	2.08	3.55	1.13	0.491	0.991	0.299	3.31	0.566	0.344	0.455	0.44	0.526	0.735	0.945	0.624	0.381	0.769	0.808	1.11	0.511	1.3	0.567	0.32	0.551	0.438	0.549	0.633	0.317	0.647	1.34	1.23	3.43	3.01	11.7	6.49	1.8	0.855	0.904	1.07	3.74	2.99	1.32	2.56	1.44	2.55	2.46	1.66	1.18	6.6
2021-09-05	19.5	17	13.7	15.2	41.1	11.8	1.97	17.6	7.9	9.08	4.58	10	6.63	15.4	6.3	11.2	10.8	29.3	5.79	5.79	17.5	12.1	3.1	14.3	8.89	10.5	15.7	3.97	5.37	4.05	3.95	10.9	10.8	24.4	12.8	4.95	4.79	8.45	11.7	13.3	12	4.13	9.71	2.74	7.5	3.85	4.03	10.3	3.18
2021-09-06	36.6	25.5	40.1	23.5	22.4	30	43	29.4	27.1	28.2	43.4	38.5	40.8	38.2	41.1	43.6	34.7	30.1	35.1	53.3	33	32.4	45.6	28.4	37.3	23.5	25.1	49.6	41.8	38.1	47.2	35.8	36.8	31.3	36.6	42	41.1	41.1	39.7	32.2	32.5	39.8	44.4	39.1	29.4	28.7	36.9	44.2	42.7
2021-09-07	10	10.9	10.9	12.9	15	12.1	12.5	14.9	11.3	11.3	11.3	13.6	11	9.16	12.4	11.7	16	9.73	9.17	10.1	8.96	14.8	12.3	13.6	11.5	14.3	18.7	14.5	11.8	11.4	12.7	11.9	10.2	13.4	13	10.8	10.7	9.28	12.3	17.8	12.2	10.6	9.88	10.6	12.1	10.3	11.7	11.7	8.88
2021-09-08	0.856	0.873	0.647	0.79	0.719	0.922	1.25	0.96	1.1	0.99	1.34	1.43	1.16	1.02	1.19	1.35	1.2	0.496	2.7	1.47	0.697	0.929	1.49	1.38	1.28	0.712	0.619	1.43	1.06	1.85	1.21	0.931	0.678	0.758	0.671	1.17	1.19	1.04	1.29	0.765	0.748	0.933	1.02	1.07	1.3	1.02	0.831	1.16	1.15
2021-09-09	61.4	38.3	74.4	54.9	71.7	39.9	52.5	45.1	36.5	52.7	70.8	72	76.4	89.5	62.2	67.5	67.7	60.3	73.4	87.3	79.8	64.4	62	45.6	53.7	41.9	43.1	55.4	72.1	67.6	71.2	54.1	62.2	48.7	35.1	52.9	59.3	72.1	63.3	50.1	54	44	81.9	52.2	45.7	55.7	56.6	62.6	49.2
2021-09-10	0.152	0.118	0.293	0.116	0.264	0.278	0.244	0.304	0.223	0.455	0.178	0.23	0.133	0.331	0.259	0.224	0.307	0.299	0.28	0.209	0.234	0.344	0.487	0.23	0.199	0.283	0.274	0.348	0.421	0.331	0.161	0.186	0.195	0.0512	0.0787	0.179	0.291	0.214	0.187	0.479	0.347	0.394	0.299	0.259	0.211	0.36	0.202	0.288	0.181
2021-09-11	2.79	2.05	2.37	1.5	2.12	1.75	2.85	1.85	1.86	1.98	2.66	2.72	2.3	2.54	2.3	2.68	2.8	1.31	2.88	2.83	2.04	2.36	3.56	2.31	3.27	2.36	1.25	3.97	3.37	3.23	3.37	2.23	1.67	1.96	1.77	2.05	2.51	2.18	2.4	2.41	1.91	2.77	3.65	2.49	3.08	2.62	3.3	2.54	3.09
2021-09-12	0.0194	0.0438	0.0668	0.0422	0	0	0	0.0367	0.00916	0.0454	0.00827	0.0188	0	0.0131	0	0.01	0	0.0402	0.0289	0.0342	0	0.0333	0	0.00831	0.0143	0.0159	0	0.0204	0.00777	0	0.0111	0.0145	0	0.0708	0	0	0.0658	0.00909	0.0431	0.0366	0.0251	0.0302	0.0244	0.0465	0	0.0113	0.00789	0.0236	0.00934
2021-09-14	0	0	0.00297	0	0.0134	0	0	0	0.00326	0	0	0	0	0	0.00377	0	0.00433	0.00716	0	0	0	0	0	0	0.00255	0.00566	0.00549	0	0	0	0	0	0.0124	0.00629	0	0	0	0	0	0.00434	0	0	0	0	0	0	0	0	0
2021-09-15	53.1	74.1	44.3	63.1	59.8	81.4	63.8	74.5	64.7	61.3	60.4	64	55.6	56.3	64.9	59.9	70.4	75	48.2	47.9	54.9	60.6	62.1	68.6	63.5	100	90.1	71.8	59.1	48.3	52.6	71.7	55.8	60	56.3	64.6	60.7	60.4	50.7	67.5	50.6	61.1	45.6	67.4	58.1	62.9	54.4	61.7	63.9
2021-12-01	0	0	0	0	0.0202	0.0154	0	0	0	0	0	0.0101	0	0	0	0.0108	0	0	0	0	0	0	0	0	0	0	0	0	0.00836	0	0	0	0	0	0	0	0	0	0	0	0	0.00649	0	0.00833	0.0108	0	0	0	0.01
84443	0.501	0.24	0.281	0.359	0.393	0.2	0.65	0.386	0.46	0.155	0.709	0.499	0.549	0.0744	0.393	0.484	0.282	0.0785	2.06	0.44	0.167	0.347	0.3	0.929	0.273	0.164	0.126	0.356	0.19	1.25	0.582	0.69	0.155	0.304	0.283	0.327	0.654	0.119	0.634	0.229	0.0599	0.469	0.519	0.381	0.753	0.57	0.709	0.121	0.797
1/2-SBSRNA4	0.245	0.215	0.458	0.356	0.554	0.542	0.369	0.293	0.735	0.399	0.36	0.424	0.384	0.332	0.462	0.466	0.257	0.226	0.467	0.443	0.489	0.234	0.655	0.292	0.262	0.56	0.391	0.621	0.415	0.212	0.282	0.57	0.492	0.323	0.553	0.531	0.352	0.409	0.425	0.446	0.476	0.62	0.366	0.675	0.267	0.493	0.3	0.63	0.341
61E3.4	0.165	0.138	0.165	0.105	0.103	0.0589	0.176	0.202	0.207	0.0842	0.161	0.111	0.11	0.0542	0.131	0.154	0.114	0.155	0.159	0.164	0.0757	0.17	0.196	0.185	0.166	0.21	0.132	0.194	0.124	0.265	0.22	0.0876	0.0337	0.0827	0.185	0.125	0.13	0.165	0.116	0.0805	0.0999	0.119	0.128	0.153	0.132	0.103	0.124	0.162	0.134
A1BG	1.87	1.77	1.67	2.61	1.36	2.6	2.34	2.51	2.84	3.13	3.26	3.57	2.93	4.63	3.05	3.46	1.93	1.41	5.34	3.77	3.37	1.73	3.69	2.25	2.88	1.75	0.753	1.66	1.93	1.63	1.96	2.28	2.05	1.93	2.2	3.24	2.9	3.05	2.1	1.08	1.47	2.6	1.75	1.77	1.78	1.3	1.36	4.67	1.94
A1BG-AS1	2.3	2.25	2.71	2.26	1.41	2.1	2.73	2.92	2.66	2.99	3.33	3.02	3.2	4.23	3.14	3.35	2.5	1.72	2.75	3.94	3.36	2.16	3.14	1.72	2.61	2.07	0.907	2.57	2.12	1.81	2.89	2.31	2.5	2.45	2.38	2.91	3.11	4.01	3.14	1.64	2.06	2.5	2.91	2.55	1.85	2.1	2.35	4.59	3.01
A1CF	0	0	0.00118	0	0.00265	0.00404	0.00116	0.00346	0	0.0032	0	0.00133	0.00453	0	0.00299	0.00142	0.00172	0.00569	0.00204	0.000967	0.00409	0.00353	0.00968	0.00587	0	0.0045	0.00436	0.00384	0.00219	0.00655	0.00157	0.00204	0	0	0	0.00457	0.00372	0	0.00152	0.00172	0.00354	0.000852	0.0023	0.00219	0	0.0016	0.00111	0	0
A2LD1	1.08	0.619	1.22	0.698	0.94	0.848	1.14	1.2	0.909	0.983	1.3	1.3	1.63	1.01	1.09	1.29	1.2	0.7	1.73	1.36	1.32	0.989	1.67	1.05	0.848	1	0.758	1.24	0.893	1.55	1.55	1.43	1.56	1.04	0.565	1.1	1.42	1.05	1.24	0.916	0.871	1.01	1.58	1.17	1.02	1.57	1.34	1.53	1.5
A2M	0.129	0.076	0.109	0.0611	0.0597	0.128	0.142	0.138	0.231	0.105	0.122	0.142	0.153	0.0835	0.101	0.165	0.088	0.122	0.338	0.0911	0.0796	0.0747	0.143	0.245	0.0456	0.0921	0.0357	0.132	0.112	0.352	0.0708	0.113	0.0961	0.0716	0.0587	0.0812	0.0761	0.0789	0.103	0.109	0.141	0.12	0.125	0.137	0.171	0.108	0.0982	0.109	0.149
A2ML1	0.00486	0.011	0.0251	0	0	0.00358	0.0144	0	0.0115	0.00285	0.00415	0.00709	0.0121	0	0.0106	0.00252	0.00916	0.00505	0.0326	0.0155	0.0182	0.00627	0.0206	0.0104	0.0072	0.00799	0.00387	0.00512	0.0039	0.0146	0.00559	0.0109	0.0176	0.00444	0.00318	0.0108	0.0132	0.0114	0.0108	0.00612	0	0.0106	0.0551	0.0117	0.0151	0.00852	0.0119	0.0207	0.00703
A2MP1	0.282	0.147	0.159	0.174	0.0842	0.144	0.275	0.247	0.596	0.0762	0.463	0.369	0.485	0.162	0.202	0.393	0.259	0.0226	0.89	0.361	0.0974	0.084	0.215	0.587	0.137	0.196	0.0346	0.168	0.0784	0.949	0.15	0.146	0	0.0397	0.0142	0.121	0.0664	0.204	0.483	0.109	0.0562	0.115	0.255	0.234	0.235	0.228	0.115	0.106	0.0837
A4GALT	0	0.239	0.0215	0.0725	0	0.0459	0.0211	0.00788	0.0707	0.102	0.0851	0.109	0.898	0	0.0477	0.155	0.0235	0.0129	0.0743	0.11	0.252	0.0107	0.115	0.00535	0.143	0.43	0.0894	0.149	0.05	0.0373	0.115	1.24	0.0337	0.125	0.18	0.0347	0.0296	0.0175	0.194	0.0785	0.129	0.0155	0.0209	0.0249	0.0708	0.0218	0.0609	0.0607	0.012
A4GNT	0	0.0499	0.0127	0.0642	0	0.0109	0.0622	0.0093	0.0487	0.0431	0.0314	0	0.0366	0.00998	0.0242	0.0229	0.00925	0	0.011	0.0052	0.033	0.00633	0.0104	0.0568	0.00545	0.0121	0.0235	0.00516	0.0295	0.00881	0.0254	0.033	0	0.0134	0.00964	0.0574	0.1	0.00691	0.0246	0	0.0286	0	0.0371	0.0294	0.0304	0.043	0.006	0.0986	0.0426
AA06	0	0	0	0	0	0	0	0	0	0	0	0	0	0	0	0	0	0	0	0	0	0	0	0	0	0	0	0	0	0	0	0	0	0	0	0	0	0	0	0	0	0	0	0	0	0	0	0	0
AAA1	0	0	0	0	0.00408	0	0	0	0	0	0	0	0.00349	0.00286	0	0	0	0.00438	0	0.00149	0.00315	0	0	0	0.00156	0	0	0	0	0.00252	0	0	0	0	0	0	0	0	0	0.00531	0	0	0.00177	0	0	0	0.00172	0	0
AAAS	12.6	12.3	13.7	9.61	11.9	10.1	12.9	8.62	9.77	10.5	13.4	11.8	15.6	17.9	13.6	13	12.2	14.8	15.6	16.4	18.8	11.3	11.7	9.86	10.8	9.8	10.2	11.6	12	12.6	12.6	11.5	16.6	10	9.28	10.8	10.7	16.5	14.7	8.38	10	11.8	14.5	12.1	9.14	11.7	12.3	12.6	13.7
AACS	1.98	1.36	2.48	1.99	2.81	1.71	2.02	1.64	1.78	2.25	2.46	2.12	2.44	2.36	2.1	2.58	3.11	2.5	1.95	2.93	2.98	2.7	2.19	1.89	2.1	1.92	1.82	2.2	2.26	2.02	2.78	1.58	2.47	1.74	1.62	1.74	2.14	2.87	2.18	2.12	1.87	2	2.69	2.01	1.55	1.84	2.31	2.77	1.93
AACSP1	0	0	0	0.00871	0.0349	0	0.00507	0	0.0113	0	0	0.0175	0	0.00812	0	0.00621	0	0	0.00893	0	0.00897	0	0.0212	0	0.00444	0.00986	0	0.0126	0	0	0	0.00896	0	0	0.0236	0	0	0	0	0.00755	0	0.00373	0	0	0.00619	0	0	0.0146	0
AADAC	0	0	0	0	0	0	0	0	0	0.0095	0	0	0.0134	0	0	0	0	0	0	0	0.0121	0	0	0	0	0	0	0	0	0	0	0	0	0	0	0	0	0	0	0	0	0	0	0	0	0	0	0	0
AADACL2	0	0	0	0	0	0	0	0	0	0	0	0	0	0	0	0	0	0	0	0	0	0	0	0	0	0	0	0	0	0	0	0.013	0	0	0	0	0	0	0.00967	0	0	0	0	0	0	0	0	0	0
AADACL3	0	0	0	0	0	0	0	0	0	0	0	0	0	0	0	0	0	0	0	0	0	0	0	0	0	0.00529	0	0	0	0	0	0	0	0	0	0	0	0	0	0.00405	0	0	0	0	0	0	0	0	0
AADACL4	0	0	0	0	0	0	0	0	0	0	0	0	0	0	0	0	0	0	0	0	0	0	0.00586	0	0	0	0	0	0	0	0	0	0	0	0	0	0	0	0	0	0	0	0	0	0	0	0	0	0
AADAT	0	0	0	0	0	0	0	0	0.0103	0.019	0	0	0	0.00735	0	0	0	0	0	0.00383	0	0.00466	0	0.00465	0	0	0.00864	0	0.0087	0.00649	0	0	0	0	0	0	0.00737	0	0.00604	0	0	0	0	0	0	0	0	0	0.00523
AAED1	1.91	1.35	1.23	1.89	1.34	1.41	2.16	1.56	2.22	2.38	2.12	2.59	1.67	2.09	1.82	2.14	2.25	1.24	2.79	1.67	1.48	1.78	2.37	2.57	1.79	2.08	1.36	2.14	2.49	2.2	2.09	2.04	1.79	1.26	1.53	2.27	2.59	1.65	2.03	2.04	1.25	2.98	1.64	2.82	2.27	2.64	2.03	2.09	2.15
AAGAB	10.1	11.6	7.04	6.66	9.11	7.58	9.74	7.89	7.17	9.36	9.13	8.51	9.03	10.7	7.77	7.63	9.69	8.88	8.13	8.62	11.3	9.11	7.94	8.98	7.8	8.17	8.2	9.57	9.17	8.51	10.1	8.71	13	9.92	7.91	8.76	8.68	8.86	8.98	9.47	8.68	8.72	9.12	9.78	8.41	9.06	9.19	8.91	11
AAK1	2.32	1.68	2.9	2.49	2.53	2.8	2.87	2.66	3.05	2.57	3.25	2.59	2.37	2.24	2.9	2.88	2.44	1.68	2.9	3.07	2.59	2.55	3.41	2.74	3.14	2.05	2.41	3.82	3.2	3.62	2.94	1.98	2.13	1.78	2.77	3.27	3.01	2.26	2.68	2.66	2.85	2.96	2.62	2.49	3.36	2.31	2.69	3.6	2.38
AAMP	25.1	17.9	31.8	18.7	27.5	17.7	23.7	18.1	15	27.5	26.3	27.9	36.4	39	24.8	25.8	30.7	30.8	35.3	35	48.8	27.3	22.9	20.6	22.2	24.6	19.2	22.6	30.2	26.4	31.4	24	40.2	21.9	17	23.2	24.6	33.9	28	20.4	21.3	22.2	33.8	26	19.8	24.6	25.6	23.8	26
AANAT	0.523	0.83	0.628	0.353	0.35	0.432	0.848	0.323	0.342	0.197	0.388	0.369	0.505	0.287	0.423	0.561	0.289	0.388	0.585	0.273	0.475	0.23	0.225	0.299	0.341	0.317	0.387	0.192	0.19	0.5	0.329	0.382	0.506	1.46	0.938	0.687	0.453	0.392	0.527	0.635	0.628	0.481	0.685	0.453	0.875	0.546	0.371	0.182	0.901
AARS	9.86	6.81	9.87	5.2	7.97	5	9.11	5.08	4.79	7.17	8.18	8.03	10.2	14.8	8.52	8.76	7.92	8.5	7.53	14.1	12	9.3	6.82	5.68	7.22	7.07	5.14	9.95	9.85	9.54	15.8	7.06	12.4	7.59	5.86	7.26	8.06	10	8.74	6.98	8.8	11.8	12.6	8.17	6.5	8.74	13.7	8.09	11.5
AARS2	1.96	1.87	2.54	1.98	1.85	1.77	2.79	2.82	2.58	2.29	3.32	2.45	2.95	2.54	2.84	3.24	2.21	2.12	4.14	3.61	2.04	2.48	3.04	2.46	2.83	2.3	1.72	2.54	3.15	3.24	2.74	2.09	2.09	1.99	2.21	3.06	3.01	2.93	2.84	1.58	2.08	2.72	3.08	2.68	2.29	2.26	2.47	2.99	2.92
AARSD1	2.37	2.03	2.93	1.59	1.96	2.11	2.81	2.87	2.28	2.51	3.3	2.82	3.63	3.87	2.7	3.21	2.72	2.44	2.97	4.22	4.97	2.06	2.72	2.15	2.49	2.4	1.7	3.48	3.03	2.62	3.11	2.77	4.84	2.38	2.19	2.96	2.72	3.26	3.19	1.83	1.73	2.5	3.21	2.83	1.88	2.83	2.81	3.22	3.52
AASDH	1.81	1.96	2.13	1.64	1.33	2.42	2.62	2.32	2.28	3.05	2.75	2.29	2.03	2.08	2.68	2.25	2.03	1.97	2.02	2.81	1.51	2.37	3.27	2.26	2.52	1.87	1.98	3.34	2.83	2.44	3.15	2.31	2.21	1.48	2.46	2.94	3.22	2.04	2	2.37	2.49	2.7	1.96	2.3	2.52	2.52	2.52	2.62	2.48
AASDHPPT	4.9	5.18	6.26	4.68	5.1	6.09	7.66	6.87	6.51	7.57	7.19	7.23	5.8	4.79	7.54	7.54	7.54	4.33	4.92	6.67	3.85	6.95	8.03	6.87	7	6.2	6.53	9.69	8.26	7.49	8.04	7.5	5.37	5.29	6.74	7.84	9.18	5.25	6.05	8.18	6.58	8.1	6.24	7.76	7.24	6.99	7.38	7.3	6.48
AASS	0.169	0.0803	0.243	0.187	0.0732	0.37	0.31	0.275	0.454	0.263	0.352	0.289	0.438	0.223	0.377	0.534	0.284	0.189	0.225	0.228	0.0897	0.246	0.732	0.337	0.245	0.241	0.0566	0.523	0.321	0.55	0.273	0.139	0.0802	0.142	0.59	0.329	0.332	0.175	0.213	0.143	0.19	0.263	0.198	0.257	0.392	0.096	0.206	0.322	0.22
AATF	23.2	15	22.8	16.5	35.9	14.8	14.1	13	12.3	18.8	13.7	18.2	24.5	30.9	14.7	14.7	25.8	39.5	13.8	22.7	41.1	24.8	12.2	14.9	11.8	22.8	23.8	14.2	18.8	16	21.6	14.1	34.5	23.8	13.8	12.6	12.7	21.6	20.9	25.2	21.7	13.4	23.6	14.1	13.9	22.5	17.5	12	18
AATK	31.5	25.8	25.5	74.8	66.6	63	12.4	25.6	26.3	14.3	11.9	21	16.4	17	25.3	22.6	20.2	61	17.7	16.2	21.6	24.9	14	38.9	25.7	35.1	68.7	3.78	9.85	10.9	6.3	20.8	15.2	52.3	31.4	12.2	5.64	16.1	21.5	27.4	52.7	8.34	27.9	12.4	23.1	15.7	13.1	22.2	8.76
AATK-AS1	0	0	0.0142	0.0601	0.016	0.0975	0.0419	0.0418	0.0235	0.00968	0.0141	0.0241	0.0137	0.0112	0.00905	0.0599	0.0104	0.0172	0.0123	0.0234	0	0.0213	0.0117	0.0567	0.0245	0.0136	0.0132	0.0058	0	0	0.0095	0	0	0.0151	0.0217	0.00921	0	0.00776	0.0092	0.0104	0.0214	0	0.0347	0.00661	0.0256	0.00966	0.00674	0	0.00797
ABAT	6.5	4.96	5.3	5.08	7.93	9.81	3.62	5.38	9.25	5.33	3.65	3.26	3.15	4.31	4.34	4.18	5.41	9.25	3.13	4.2	3.37	7.59	4.15	6.83	5.03	8.48	10.7	4.37	3.7	2.73	3.67	3.21	1.83	6.11	5.54	3.15	2.51	3.96	4.7	11.1	7.05	2.66	4.79	3.82	9.79	3.99	4.38	3.63	2.55
ABCA1	4.33	11.9	4.73	7.47	5.74	8.07	3	3.76	4.88	4.15	1.42	1.71	1.26	1.25	3.81	1.72	1.78	7.29	1.14	1.64	1.36	4.18	3.72	4.07	4.14	7.42	12.7	1.91	3.14	2.42	4.5	6.83	4.36	7.05	26.4	4.65	2.91	2.24	4.08	22.8	22.2	7.92	5	4.66	13	14	7.42	9.76	3.7
ABCA10	0.0782	0.0605	0.0657	0.0688	0.0239	0.0759	0.115	0.0729	0.101	0.121	0.111	0.0781	0.0512	0.0279	0.0834	0.1	0.0336	0.0599	0.129	0.0684	0.0216	0.0567	0.102	0.141	0.137	0.132	0.128	0.0881	0.0611	0.0986	0.0923	0.108	0.0929	0.0602	0.089	0.0849	0.0602	0.0773	0.0573	0.0726	0.115	0.0706	0.149	0.0955	0.142	0.125	0.0604	0.0577	0.0397
ABCA11P	0.797	0.746	0.842	1.05	0.373	0.781	1.13	0.661	1.58	1.39	1.19	1.19	0.923	0.867	1.08	1.2	1.08	0.515	1.08	0.943	0.865	0.84	1.45	0.808	0.993	0.656	1.07	1.63	1.34	1.06	0.933	0.72	0.758	0.729	1.16	1.19	1.37	0.62	0.988	0.719	0.73	1.08	0.93	1.24	0.703	0.731	1.21	1.3	0.935
ABCA12	0.0028	0	0	0.00204	0	0.00207	0.00237	0.00887	0.00266	0	0	0	0	0.0038	0.00154	0	0	0.00292	0.00209	0.000992	0	0.00121	0	0	0.00104	0	0.00224	0.00197	0	0	0	0.0021	0	0	0	0	0	0.00132	0.00312	0.00177	0	0.00262	0.00354	0.00561	0.00145	0	0.00114	0	0.00135
ABCA13	0.112	0.831	0.0314	0.442	0.391	0.205	0.0526	0.0527	0.753	1.19	0.0544	0.0546	0.0239	0.0925	0.0706	0.0432	0.0924	0.894	0.0486	0.0316	0.0477	0.0457	0.0258	0.21	0.0376	0.104	0.175	0.109	0.189	0.133	0.0288	0.177	0.223	0.123	0.226	0.0676	0.604	0.0256	0.157	0.114	0.162	0.125	0.0389	0.179	0.118	0.0993	0.138	0.464	0.111
ABCA17P	0.0871	0.134	0.051	0.0995	0.139	0.11	0.0737	0.0393	0.106	0.0583	0.0638	0.0817	0.0515	0.11	0.0443	0.119	0.0626	0.116	0.116	0.0462	0.0978	0.0803	0.0947	0.0454	0.0622	0.0768	0.0694	0.0437	0.0374	0.0745	0.0394	0.093	0.0731	0.0682	0.0408	0.0659	0.0635	0.108	0.107	0.0627	0.101	0.031	0.0601	0.0547	0.0932	0.131	0.0634	0.0682	0.096
ABCA2	16.5	22	11.4	22.3	19.5	20.7	16.5	16.9	16.7	8.79	15.4	11.7	15.7	9.95	15.8	15	9.09	17.3	30.5	14.5	8.15	10.8	13.1	19.9	17.3	22.7	17.6	7.43	9.03	20.6	9.15	15.9	7.49	15.8	13.8	11.7	11.2	12.7	15.3	14.1	16	10.8	15.6	11.2	19.1	16.9	15.9	17.8	14.7
ABCA3	1.2	0.48	0.897	0.838	0.862	0.589	1.05	0.694	0.899	0.581	1.38	1.01	1.13	1.37	0.92	1.24	0.734	0.438	2.29	1.44	0.825	0.78	1.31	0.929	1.07	0.566	0.521	0.769	0.914	1.36	0.846	0.788	0.608	0.582	0.487	0.796	0.626	0.815	1.05	0.724	0.458	0.659	1.19	0.656	1.02	0.814	0.818	0.87	0.88
ABCA4	0	0.0281	0.00307	0	0.00345	0.0315	0.00451	0.009	0.00337	0.00208	0.00759	0.00692	0.0118	0.00482	0	0.00184	0.00894	0.0961	0.0053	0.00252	0.0133	0.00306	0.00756	0.00916	0.00132	0.00585	0	0.00499	0.00999	0	0	0.00266	0.00642	0.00325	0.00932	0.00198	0.00121	0.00334	0	0.0112	0	0.00111	0.00149	0	0.00367	0.00416	0.00725	0.00217	0.00515
ABCA5	1.15	1.48	1.2	1.89	0.644	2.07	1.65	2.23	2.74	1.94	1.92	1.3	0.81	0.652	1.41	1.72	0.878	0.479	1.97	1.01	0.347	1.24	2.03	2.5	2.27	1.67	2.27	1.68	1.24	1.6	1.66	1.82	0.61	1.41	1.54	1.7	1.38	0.932	1.19	1.65	1.29	1.77	2.11	1.48	2.95	1.93	1.05	1.2	1.08
ABCA6	0.0787	0.0667	0.0382	0.025	0.0143	0.0581	0.0458	0.0404	0.0815	0.112	0.042	0.079	0.0408	0.0634	0.0512	0.0459	0.068	0	0.0624	0.0644	0.0626	0.0741	0.0975	0.0866	0.0456	0.0526	0.0275	0.0535	0.0869	0.0825	0.082	0.0405	0.04	0.045	0.0484	0.0357	0.0736	0.0508	0.0658	0.0248	0.0605	0.0859	0.165	0.0453	0.109	0.0403	0.0301	0.0809	0.0332
ABCA7	56.8	97	55.3	56	101	97.3	31.7	34.7	80.5	46.7	32.6	44	52.4	55.4	27	55.1	37.6	79.4	58.6	43.7	44.6	67.4	48.7	69.5	54.2	76.7	58.8	19.8	30	35.2	34.6	55.5	51.2	104	87.7	43.4	27.2	61.8	48.7	36.9	112	43	36.3	25.6	72.9	27.2	41.5	63.4	43.2
ABCA8	0	0	0	0	0	0.00336	0	0	0	0.00267	0	0	0	0	0	0	0	0	0	0.00322	0	0	0	0	0	0	0.00363	0	0	0	0	0	0	0	0	0	0	0.00214	0	0	0	0	0.00191	0	0	0	0	0	0
ABCA9	0.0661	0.00467	0.0392	0.0271	0.0241	0.0427	0.0227	0.0183	0.0372	0.0654	0.0177	0.0161	0.0103	0.0252	0.0408	0.015	0.0338	0.0258	0.0216	0.0234	0.0217	0.0267	0.0102	0.0497	0.0521	0.0272	0.0494	0.0319	0.0299	0.00991	0.0428	0.0155	0.0224	0.0151	0.0298	0.0138	0.0183	0.0582	0.0253	0.0234	0.0428	0.0335	0.073	0.0215	0.0449	0.0169	0.0219	0.0302	0.0259
ABCB1	1.45	0.431	1.43	1	1.31	1.04	2.18	1.25	2.08	1.61	2.42	1.6	1.53	0.629	2.08	1.55	1.11	0.299	2.15	1.11	1.05	1.14	2.02	2.03	2.21	1.5	1.38	2.7	1.79	3.29	1.27	0.942	0.624	0.848	0.851	1.31	1.53	0.776	1.16	1.24	1.09	0.766	0.989	1.26	1.97	0.656	1.21	1.38	1.45
ABCB10	2.15	4.3	1.77	2.4	1.59	2.89	2.92	2.63	2.74	3.23	2.39	2.46	1.73	1.37	2.29	1.99	1.93	1.12	2.46	1.7	0.91	2.09	3.09	2.67	2.36	1.71	1.88	3.72	2.85	2.97	2.35	2.29	1.48	1.5	2.32	2.86	3.46	1.46	1.51	2.73	2.22	3.43	2.11	3.19	3.05	2.87	3.18	2.05	2.37
ABCB11	0.0109	0.0247	0.00471	0.0317	0.0423	0.0282	0.00923	0.0276	0.0284	0.00639	0.0163	0.00796	0	0.0148	0.00897	0	0	0.0113	0.0122	0.00772	0	0.0211	0.0058	0.0117	0.0121	0.0853	0.0218	0.00957	0.00438	0	0.0126	0.0204	0.00493	0.0299	0.0858	0.0243	0.0148	0.00512	0.00912	0.0241	0.0318	0.0102	0.0138	0.0218	0.0226	0.0447	0.02	0.0166	0.00789
ABCB4	0.189	0.096	0.42	0.385	0.019	0.366	0.464	0.331	0.402	0.0765	0.513	0.34	0.287	0.102	0.562	0.359	0.185	0.143	0.141	0.397	0.249	0.276	0.791	0.25	0.467	0.392	0.375	0.89	0.225	0.317	0.361	0.0684	0.0885	0.448	1.02	0.426	0.213	0.215	0.291	0.111	0.0803	0.222	0.192	0.363	0.378	0.0115	0.741	0.00796	0.334
ABCB5	0.00337	0.0457	0	0	0.00327	0.00249	0.00143	0	0.0016	0.00197	0.00432	0	0.00279	0	0.00369	0	0	0.00351	0	0.00358	0.00252	0.00145	0.00358	0	0.00375	0.0111	0.00269	0	0	0.00202	0.00388	0.0126	0	0.00308	0.00442	0	0	0.00158	0	0.00212	0.00218	0	0	0.0027	0.00348	0.00394	0.00137	0.00411	0.0065
ABCB6	1.96	5.27	1.81	1.96	2.51	2.28	1.57	1.71	2.19	1.67	1.8	1.34	1.67	2.46	1.79	1.62	1.32	2.41	1.93	1.57	2.04	1.3	1.34	1.57	1.81	1.9	1.82	1.42	1.25	1.5	1.78	2.05	2.04	2.67	1.91	1.9	1.24	2.31	2.03	1.63	2.82	1.76	1.47	1.27	1.36	2.35	2.07	2.09	1.55
ABCB7	3.36	3.55	4.62	3.91	3.68	3.37	4.46	3.79	4.15	5.22	4.79	4.54	5.01	5.1	4.53	4.11	4.74	4.56	4.12	5.04	4.51	4.18	4.87	4.16	3.42	3.87	3.23	5.68	5.58	4.69	5.88	4.11	5.24	3.34	3.99	4.99	5.61	5.13	4.89	3.7	3.92	4.87	4.41	5.1	4.26	4.66	4.92	5.2	5.27
ABCB8	4.44	3.6	4.54	3.26	3.54	3.2	4.51	3.74	3.34	3.7	5.13	4.08	5.34	5.74	5.15	5.82	3.45	3.66	6.36	5.95	5.01	3.63	4.83	3.45	4.58	3.33	2.39	3.51	4.52	5.61	5.11	4.69	5.89	3.57	2.74	4.68	4.23	5.26	4.28	2.92	3.61	4.14	5.21	4.66	3.93	4.45	4.06	5.31	5.31
ABCB9	0.544	0.53	0.623	0.286	0.497	0.365	0.528	0.368	0.354	0.252	0.627	0.413	0.478	0.58	0.68	0.584	0.306	0.481	0.51	0.627	0.773	0.406	0.395	0.582	0.704	0.818	0.257	0.38	0.508	0.497	0.852	1.35	1.25	0.469	0.349	0.449	0.502	0.529	0.437	0.371	0.828	1.57	0.729	0.841	0.314	0.537	1.24	0.625	2.17
ABCC1	5.69	4.97	8.36	6.59	7.5	5.12	5.63	7.73	7.51	6.36	7.07	6.52	6.77	5.41	6.12	7.64	5.95	5.17	5.9	7.95	5.2	8.04	6.24	6.3	7.55	5.67	6.45	6.44	5.82	6.59	6.72	5.38	5.16	5.84	6.12	6.89	5.86	8.58	9.74	7.63	7.31	7.26	6.69	6.03	6.95	5.71	7.86	6.64	5.78
ABCC10	5.36	3.89	4.3	4.06	4.18	3.34	4.95	4.22	4.58	3.68	6.26	5.17	5.39	4.14	4.95	5.97	3.92	3.71	9.59	6.09	3.52	3.73	5.41	4.62	5.15	3.84	3.27	3.75	4.29	6.14	5.17	4.74	3.86	4.16	3.56	5.05	4.83	5.46	4.99	4.16	4.31	4.42	6.03	4.52	4.93	5.08	4.81	5.31	5
ABCC11	0.00531	0.006	0.00687	0.977	0.0463	0.403	0.00449	0.0571	0.276	0.00622	0.0159	0.0129	0.0044	0.0036	0.0116	0.011	0	0.0331	0.0198	0.0131	0.00795	0.032	0.0094	0.0843	0.00787	0.188	0.3	0.00559	0.0149	0	0.00305	0.0159	0	0.199	0.129	0.0148	0.00541	0.00249	0.00296	0.0803	0.0618	0.00993	0.00669	0.00849	0.00274	0.0869	0.0368	0.00647	0
ABCC12	0	0	0	0.00367	0	0	0	0	0	0.00295	0	0	0	0	0	0	0	0	0	0	0	0	0	0	0	0.00415	0	0	0	0	0	0	0	0	0.00661	0	0.00343	0	0.00281	0	0	0.00157	0	0.00202	0	0.00295	0	0	0
ABCC13	3.68	6.68	0.0799	0.687	0.847	1.41	0.164	0.212	0.439	1.15	0.512	0.451	0.738	1.5	0.85	0.439	0.649	0.257	1.59	0.147	0.495	0.194	0.234	0.17	0.638	0.886	0.528	0.183	0.258	0.486	1.17	2.34	1.1	0.822	1.79	0.522	0.477	0.414	0.644	0.178	0.325	0.0165	0.0371	0.311	0.907	3.18	0.727	0.672	0.574
ABCC2	0.975	1.1	0.763	1.7	0.996	2.26	1.04	0.812	1.19	0.74	0.645	0.539	0.637	0.504	0.72	0.764	0.716	1.52	0.477	0.573	0.378	0.932	0.838	1.29	1.02	1.47	2.11	0.585	0.59	0.603	0.768	0.721	0.415	0.853	1.88	0.783	0.573	0.724	0.85	1.33	1.68	1.19	0.618	0.642	1.01	0.878	1.11	0.88	0.779
ABCC3	3.04	0.889	3.49	0.87	4.65	0.886	1.12	1.06	1.33	2.19	2.45	1.76	3.42	4.96	1.2	0.971	2.42	3.01	1.68	1.56	3.6	2.51	1.8	1.51	1.82	3.82	1.94	2.54	2.06	1.58	1.8	2.24	1.14	1.12	1.42	0.813	1.21	2.4	2.11	3.32	3.68	1.03	4.04	1.71	1.62	2.61	2.37	1.88	1.28
ABCC4	1.75	1.7	1.04	0.667	1.64	0.95	0.911	0.777	0.59	0.881	0.851	0.967	0.943	0.811	0.829	0.879	0.822	0.962	1.07	0.905	0.671	0.579	0.617	0.791	1	0.6	0.525	1.23	0.923	0.979	1.02	1.01	0.55	0.64	1.02	0.979	0.819	0.622	0.824	1.55	1.17	0.744	0.932	0.582	1.48	0.731	1.38	0.993	0.967
ABCC5	4.56	6.95	8.18	14	10.4	12.5	6.32	13.5	17.8	7.69	7.04	7.21	6.98	5.74	7.67	8.98	7.11	10.9	5.31	4.84	3.65	7.6	6.05	13.4	8.58	10.2	20.7	4.76	3.39	4.07	2.9	3.54	4.82	8.57	12.9	4.21	3.65	5.55	6.24	11.2	12.7	3.99	6.35	5.28	8.12	4.97	4.71	5.78	2.19
ABCC5-AS1	0.0555	0	0	0	0	0.041	0	0	0.0263	0	0	0	0.046	0	0.0304	0.0288	0	0	0.0414	0.0589	0.0416	0.0239	0.0197	0.0238	0	0	0	0.0585	0	0.0333	0	0	0.1	0	0	0	0.0189	0	0	0.035	0	0.0173	0	0	0	0.0325	0.0227	0	0
ABCC6	0.523	1.26	0.707	1.5	0.96	0.744	0.326	0.815	0.612	0.643	0.512	0.552	0.507	0.668	0.453	0.661	0.702	1.29	0.804	0.482	0.601	1.04	0.628	0.776	0.594	0.945	0.845	0.306	0.373	0.311	0.373	0.74	0.658	0.943	0.777	0.331	0.526	1.2	0.455	1	1.16	0.977	0.416	0.441	0.364	0.68	0.377	0.583	0.514
ABCC6P1	0	0	0	0	0	0	0.00404	0	0.00904	0	0.00408	0	0	0	0.00523	0	0.006	0.00993	0	0	0	0.00411	0	0.0123	0	0	0.00761	0	0	0	0	0	0	0	0	0	0.00325	0	0.0106	0	0	0.0149	0.00401	0	0.00493	0	0.00389	0	0
ABCC6P2	0	0	0	0	0	0	0.0156	0.0233	0	0	0.0158	0	0	0	0	0	0	0.0384	0	0	0	0	0	0	0	0	0	0	0.0148	0	0	0	0	0	0	0	0	0	0	0	0	0	0	0	0	0	0	0	0
ABCC8	0	0	0	0	0	0	0	0	0	0	0	0	0	0	0	0	0	0	0	0.00185	0	0	0	0	0	0	0.00417	0.00367	0	0	0	0.00391	0	0	0.0137	0	0	0.00246	0	0	0	0	0	0	0	0.00306	0	0	0
ABCC9	0	0	0.00133	0	0.00896	0	0.00391	0.00389	0.00437	0	0	0	0	0.00418	0.00337	0.00319	0.00193	0.0064	0.0023	0.00109	0.0023	0.00132	0	0	0	0.00507	0.00245	0.00108	0.00124	0	0	0	0	0.00281	0	0.00172	0	0.00145	0	0.00194	0	0	0.00129	0	0	0	0	0.00188	0
ABCD1	6.7	7.2	6.34	5.9	7.79	4.71	3.47	3.81	3.39	5.19	3.71	4.14	5.31	6.78	4.56	4.15	4.06	7.84	5.37	5.1	4.92	6.15	3.93	4.27	4.66	4.97	4.95	2.25	4.28	4.41	5.61	5.77	7.1	7.46	6.19	4.28	4.7	6.07	4.69	7.22	8.57	5.06	7.8	4.5	5.33	8.87	5.9	4.97	5.05
ABCD2	0.771	0.8	0.919	0.795	0.511	1.3	1.78	1.25	1.46	1.29	1.32	1.36	0.873	0.867	1.43	1.49	0.766	0.249	0.873	1.44	0.274	0.907	2.12	1.25	1.65	0.478	0.579	2.86	1.52	1.75	1.29	1.63	0.604	0.566	1.22	1.85	2.33	0.721	0.848	0.784	1.14	1.78	1.26	1.56	1.48	1.39	1.05	1.83	1.2
ABCD3	2.76	3.62	2.96	3.15	1.83	3.13	3.89	3.19	3.57	4.7	3.52	4.02	2.46	2.27	3.16	3.59	3.28	2.27	3.37	2.77	1.43	3.41	4.16	3.79	3.71	2.95	3.39	5.24	4.49	4.04	3.86	3.45	2.84	2.65	3.08	4.05	5.17	2.35	2.05	3.16	2.91	4.4	2.87	4.24	4.3	3.43	3.54	2.97	3.42
ABCD4	6.58	5.82	6.29	6.06	5.9	5.44	7.28	6.69	7.52	5.95	8.23	7.23	7.01	6.58	7.44	7.59	5.98	5.59	9.52	8.15	7.36	5.7	8.29	6.99	7.43	5.62	5.22	6.78	6.79	8.37	6.13	5.87	6.26	6.46	5.33	7.73	7.44	8.14	7.13	4.89	5.54	7.24	7.15	7.56	6.38	5.43	6.31	8.05	7.29
ABCE1	2.14	2.84	2.2	2.34	1.59	2.58	3.44	3.05	2.76	3.86	3.8	3.24	2.58	2.49	3.1	2.93	3.25	1.32	2.68	3.17	1.64	3.02	3.57	3.25	3.65	2.48	1.74	6.1	4.53	3.3	4.23	3.73	3.33	1.96	3.5	4.4	4.33	2.2	2.36	2.58	2.69	4.35	2.39	4.32	3.03	2.76	3.64	3.47	3.6
ABCF1	14.7	9.22	13.6	8.03	13.3	7.55	11	6.94	7.15	13	11.6	11.6	13.9	17.6	11.1	11.1	13	13.1	11.8	18	19.4	12.9	9.87	9.06	10.7	10.2	7.69	14	14.6	13.3	17.9	9.75	15.1	10.3	8	10.4	11.1	13.5	12.7	10.2	11.4	10.7	16.5	11	10.4	12.9	13.8	12.3	13.2
ABCF2	6.47	6.25	7.24	5.42	6.6	4.97	6.45	4.87	4.98	6.58	6.86	6.43	7.32	10.9	6.88	6.9	7.14	6.6	7.42	9.91	10.2	7.18	6.76	5.4	7.03	5.32	4.06	8.53	7.52	6.67	9.58	6.19	8.15	5.54	5.1	6.26	6.44	8.37	6.53	5.47	5.84	6.78	8.14	6.22	5.57	7.75	8.31	6.02	6.8
ABCF3	15.8	10.8	16.7	12.2	17.9	10.7	14.1	11.1	11.2	14	16.1	15.3	17.5	19.9	14.2	15.2	16.3	18.9	17.1	20	22.6	14.3	11.7	13.1	13	13.8	13.4	13	15	15.5	17	11.7	18.4	13.5	10.4	13	12.6	18.7	15.9	12.4	12.3	12.6	17.7	12.9	11.8	13.6	14.4	12.9	14.8
ABCG1	11.4	19	16.4	19.6	26.4	15.2	5.2	11.7	15.7	10.3	6.28	4.68	10.4	7.15	9.41	5.94	7.19	35.6	2.21	7.42	11.1	20.1	7.75	9.77	8.31	16.5	21.8	5	6.61	5.46	13.6	9.93	18	22.2	36.5	6.2	5.57	13.7	14.4	33.7	31.8	13.2	10.9	9.02	17	18.8	12.4	14.2	9.39
ABCG2	0.482	1.24	0.0685	0.0677	0.0956	0.456	0.15	0.0658	0.0233	0.237	0.11	0.0532	0.254	0.104	0.162	0.0652	0.275	0.0398	0.269	0.277	0.041	0.0872	0.0814	0.0282	0.178	0.054	0.0524	0.156	0.13	0.141	0.12	0.364	0.321	0.1	0.226	0.238	0.164	0.0771	0.168	0.0759	0.198	0.133	0.0575	0.226	0.263	0.195	0.179	0.303	0.1
ABCG4	0.00662	0.00748	0.0143	0.0144	0.0128	0.00977	0.0028	0.0126	0.0094	0	0.00848	0.0225	0.00548	0.018	0.0109	0.024	0.00416	0.0275	0.0148	0.014	0.00496	0.0057	0.0281	0.00852	0.00491	0.0109	0.0106	0.0116	0.00531	0.00793	0.0152	0.00495	0.012	0.00605	0.0217	0.0222	0.0113	0.0155	0.00737	0.025	0.0129	0.0248	0.0111	0.0132	0.0308	0.00774	0.0054	0.00806	0.00638
ABCG5	0	0	0.0041	0	0.0461	0	0.0121	0	0.0135	0	0	0.0139	0.0236	0.0129	0.0104	0	0.00598	0	0	0.00673	0.0142	0.00818	0.0135	0.0122	0.00352	0	0.0227	0	0.00382	0	0.0109	0	0.0172	0.0174	0.00623	0	0	0.00446	0	0.012	0	0	0.004	0.0038	0	0	0.00388	0.0116	0.00917
ABCG8	0	0	0	0	0	0	0.00414	0	0	0.00573	0	0	0	0	0	0	0	0	0	0	0	0.00421	0	0	0	0	0	0.00343	0	0.00586	0	0	0	0	0	0	0	0	0	0	0	0	0	0	0	0	0	0	0.00471
ABHD1	1.1	0.876	0.645	0.485	0.612	0.665	0.808	0.786	0.819	0.644	0.831	0.903	1.09	1	0.928	1.32	0.555	0.824	0.806	0.988	1.63	0.651	0.715	0.82	0.547	0.786	0.804	0.746	0.694	0.82	0.881	0.862	1.29	0.609	0.425	0.884	0.894	1.16	1	0.681	0.49	0.764	0.863	0.822	0.577	0.822	0.632	0.79	1.01
ABHD10	4.63	5.8	3.69	4.62	3.02	4.89	5.34	5.1	5.75	7.31	5.93	5.71	4.29	5.51	4.68	6.18	4.78	3.43	6.33	4.49	5.13	5.77	6.05	6.18	5.64	4.73	5.23	8.65	7.77	5.96	6.14	5.48	6.64	4.07	5.39	7.1	8.06	5.3	3.62	5.05	4.43	7.53	4.47	7.3	5.49	5.55	6.42	5.62	7.37
ABHD11	3.81	4.92	4.21	5.54	6.85	5.42	3.77	6.27	4.29	4.14	4.74	3.47	6.3	7.25	5.69	5.59	4.99	7.93	7.88	5.25	5.71	4.86	3.84	4.2	3.78	5.33	5.97	2.7	3.85	4.16	2.67	4.6	8.75	7.05	4.59	3.6	3.26	5.02	5.52	4.54	4.55	4.36	4.83	3.33	3.66	4.06	3.53	4.19	3.25
ABHD11-AS1	0.0551	1.31	0.0475	0.521	0.588	0.488	0.0466	0.209	0.183	0.129	0.165	0.107	0.411	0.486	0.543	0.457	0.277	1.55	0.575	0.253	0.165	0.237	0.254	0.378	0.327	0.227	0.263	0.251	0.265	0.297	0.0317	0.865	1.34	0.705	0.253	0.0922	0.262	0.103	0.307	0.625	0.214	0.618	0.116	0.022	0.199	0.225	0.135	0.134	0.292
ABHD12	6.48	4.31	7	5.27	5.55	4.07	5.52	2.29	4.15	5.89	6.35	6.35	8.35	8.03	5.46	5.54	6.4	6.67	9.35	6.84	11.2	5.69	5.32	4.55	4.02	5.76	3.67	5.31	6.27	6.66	6.37	6.87	9.7	5.11	3.32	5.74	6.81	8.12	5.92	4.91	4.4	5.79	5.91	6.27	4.64	8.26	7.16	5.52	7.53
ABHD12B	0.488	1.02	0.914	2.11	1.36	2.5	0.69	0.724	0.953	0.849	0.215	0.475	0.569	0.476	0.61	0.538	0.844	1.73	0.284	0.308	0.4	1.25	0.475	0.917	0.825	1.63	1.95	0.294	0.269	0.283	0.307	0.285	0.303	1.31	1.19	0.281	0.285	0.645	0.637	1.3	0.928	0.39	0.5	0.366	1.02	0.58	0.473	0.335	0.5
ABHD13	3.13	4.88	2.18	5.68	3.37	5.98	3.92	4.46	5.49	5.17	2.99	3.92	1.88	2.36	3.62	3.44	2.73	2.77	3.57	1.94	1.72	3.82	4.67	6.23	4.62	4.69	7.15	5.39	4.31	3.7	3	4.45	3.26	4.19	6.42	4.94	5.11	2.24	1.72	5.72	5.3	4.64	2.08	5.15	5.11	4.46	2.99	3.27	3.52
ABHD14A	7.99	5	6.03	4.86	4.29	3.96	6.46	5.03	5.18	4.41	7.09	7.54	9.61	11.7	7.22	10.6	6.64	3.98	11.3	10.4	10.7	4.78	7.37	5.12	6.65	4.12	3.02	7.35	6.63	8.24	5.96	9	11.3	4.62	3.9	7.69	7.91	8.78	8.54	3.07	4.25	6.46	7.16	7.37	4.67	6.24	5.25	8.82	8.87
ABHD14A-ACY1	3.76	2.68	3.84	2.9	2.56	2.36	3.5	3.02	2.81	3.1	3.86	3.66	5.43	6.43	4.1	5.55	3.97	2.87	5.2	5.88	6.52	2.82	3.68	2.98	3.25	2.56	1.99	3.78	3.95	4.42	3.3	4.39	5.54	2.93	2.54	3.84	3.95	4.44	4.27	2.29	2.51	3.44	4.45	3.82	2.44	3.96	3.14	4.63	4.99
ABHD14B	18	13.1	21.9	13.8	15.1	15.5	16.8	18.4	16.4	17.5	24	22.9	29.8	32.2	22.5	33.7	22	19.1	23.2	32.8	34.5	17	24.2	16.1	15.3	13.6	11.5	20.1	18.8	21	20.4	21.6	23.3	16.7	13.7	19.4	18.8	28.3	25.4	9.02	12.9	14	20.8	18.6	12.1	17.5	17.7	22.6	19.6
ABHD15	4.72	2.84	4.83	4.06	4.16	3.45	6.47	4.29	5.19	4.84	6.5	5.77	5.94	5.28	5.13	6.76	5.16	3.08	8.98	6.16	4.18	4.72	7.2	5.08	5.59	3.03	3.07	5.02	5.27	7.23	4.9	5.4	2.75	4.09	2.7	5.68	5.3	4.7	5.01	3.13	3.07	4.89	5.58	4.15	4.9	4.69	5.27	4.61	4.82
ABHD16A	35.4	35.3	31.3	31.4	43.5	29.4	25.1	25.4	21.8	22.4	21.7	23.7	26.7	29.9	23.5	22.8	29.9	50.9	28.4	22.4	39.3	25.8	21.2	27.3	23.2	30.5	46.6	16.3	21.6	20.9	20.8	30.6	42.8	39.7	27.4	22.5	20.4	33.1	30.3	34.5	39.3	22.7	28.8	23.4	29.7	30.6	23.1	26.6	25.7
ABHD16B	4.55	4.43	3.38	6.23	3.24	4.77	3.33	3.93	4.59	4.34	3.83	4.02	4.9	5.55	4.48	5.75	2.7	3.42	10.3	4.5	4.36	3.35	4.82	4.23	3.96	4.24	2.87	2.08	2.91	4.67	2.88	3.84	4.37	4.87	3.04	3.71	4.64	3.82	3.27	3.32	3.79	3.8	4.91	3.4	3.2	5.07	3.18	5.43	4.52
ABHD2	18.4	17.8	38.8	34.8	54.8	40.4	17.2	21.1	20.4	26.9	15.3	16.4	18.1	20.1	22.6	17.7	30.5	46.6	14	17.3	12.6	31.7	16.6	25.9	26.6	37.9	67.9	10.8	18.7	16.3	15.5	12.5	11.9	24.5	27.1	13.7	9.21	15.4	20.8	46.9	35.8	12.3	17.3	12.3	32.3	15.5	16.9	13.1	13.2
ABHD3	26.3	42.2	18.5	47.6	23.2	47.1	34.2	30.6	42.1	39.1	18.7	20.1	16	12.5	25.9	19.4	23.1	20.6	22.4	11	21.4	24.4	25.3	39.4	33.2	42.7	54.5	18.4	18.4	21.2	17.8	32.6	20.4	42.3	66.1	31.6	18.1	17.8	22.5	38	43.1	32.8	20	33.5	38	32.3	26.8	17.6	20.8
ABHD4	25	22.2	23.6	33.7	45.1	24.4	12.5	19.4	16.5	13.6	13.7	18.8	19.1	20.8	20.7	15.7	23.7	42.4	13.4	17	25.6	24.1	14.5	16.8	14.2	33.8	48.8	8.39	14.8	10.8	14.8	17.4	16	40.3	18.3	12.3	8.68	23.7	23.2	30.4	30.1	8.92	18.7	10.6	15	16.1	14	16.4	10.4
ABHD5	16.4	15.5	19.1	32.9	46.4	29.3	8.74	23.4	23.3	12	9.44	13.6	10.2	11.7	13.2	11	17.6	34.3	5.87	6.9	17.3	28.9	10.3	19.4	11.2	50.5	71	5.04	11	6.09	9.83	10.5	10.9	31.1	19.4	8.26	5.24	14.5	13.3	30.3	23.5	7.01	7.59	8.05	13	12.9	14.4	9.61	6.19
ABHD6	2.53	1.38	2.66	2.53	2.19	1.67	2.59	2.22	2.21	2.67	2.71	2.54	2.89	2.17	2.24	2.17	2.58	2.21	2.96	2.41	1.96	2.48	2.86	2.31	1.87	2.54	2.07	2.58	5.5	2.95	2.79	2.17	1.65	1.86	1.84	2.37	2.44	2.75	2.33	2.78	1.66	1.75	3.59	2.27	2.26	2.7	2.99	2.56	2.32
ABHD8	5.81	5.52	5.13	5.84	6.35	4.29	3.4	3.61	3.55	5.97	4.5	5.61	5.51	9.51	5.38	5.59	4.74	5.13	6.19	6	6.81	5.04	4.59	4.38	5.4	4.51	3.9	2.67	4.75	4.7	4.27	5.7	5.98	6.37	3.28	4.43	4.89	6.19	4.78	3.82	5.79	4.31	5.75	3.94	3.45	5.62	4.61	7.05	4.95
ABI1	27	30.2	23.7	31.6	34.8	31.5	24.5	28.5	25.2	21.6	19.7	25.2	20.1	18.2	25.3	21	28.6	26.1	17.5	18.9	17.6	29.8	22.4	26.7	22.5	38.8	50.1	22.7	25.2	22.5	23.2	25.8	21.1	36.2	34.8	25.5	22.6	21.7	27.5	56	39.1	23.9	20.8	26.6	28	24.9	25.9	22.8	22.8
ABI2	1.35	0.886	1.55	1.08	1.09	1.55	1.91	1.22	1.95	1.36	1.8	1.51	1.31	1.3	1.76	1.89	1.5	0.815	1.62	1.69	0.837	1.33	2.38	1.71	2.32	1.14	1.05	2.96	2.36	2	2.06	1.51	0.839	0.72	1.37	2.15	2.1	1.38	1.24	1.18	1.21	1.98	1.5	1.89	1.92	1.41	1.48	1.87	1.53
ABI3	25.8	16.6	32	19	26.1	14	23	19.9	13.4	14.3	27.2	23.3	48.4	35.6	17.5	17.2	24.2	17.5	50.7	25.1	30.8	24.1	18.5	20.6	12.2	14.3	17.5	14.4	21.7	37.2	26.2	31.9	40.1	30.6	14.3	21.7	26.3	25.4	21.7	31.1	16.4	15.4	42.4	26.6	21.2	48	31.7	17.9	33.3
ABI3BP	0.0291	0.0329	0.0176	0.0127	0.0339	0.0215	0.0172	0.00737	0.0414	0.0136	0.0199	0.0113	0.00965	0.00395	0.0383	0.00906	0.022	0	0.0217	0.0268	0.00872	0.00752	0.0186	0.03	0.0216	0.00958	0.0279	0.0348	0.0257	0.00698	0.0067	0.00871	0.0368	0.0373	0.0382	0.0065	0.0257	0.0191	0.0389	0.0294	0.0226	0.0381	0.0049	0.0256	0.015	0.0102	0.0332	0.0142	0
ABL1	3.51	2.22	3.89	3.14	3.53	2.16	2.94	2.43	2.55	2.97	3.3	2.97	3.79	3.44	2.96	3.38	3.47	2.92	3.88	4.76	3.49	3.88	3.24	2.73	3.08	2.78	2.22	3.34	4.48	4.4	4.27	2.52	2.65	2.53	2.61	2.74	3.56	3.1	2.65	3.32	3.65	3.39	4.58	2.8	3.3	3.58	4.45	2.9	2.88
ABL2	1.09	1.02	1.01	1.2	0.889	1.25	1.02	0.864	1.29	1.03	0.875	0.978	0.833	0.669	1.14	0.908	0.913	0.919	0.831	1.09	0.757	0.973	1.1	0.889	1.16	1.48	0.964	1.19	1.16	1.15	0.956	0.661	0.554	0.683	1.79	1.03	1.14	0.794	0.703	1.39	1.83	1.15	0.835	0.821	1.37	1.02	1.26	0.908	0.811
ABLIM1	8.3	5.78	12.9	7.99	7.29	9.9	11.1	9.27	10.9	8.8	13.6	10.4	8.6	11.1	13.8	14.2	9.55	4.39	5.13	16	8.43	10.9	15	5.78	15.4	9.07	8	25.3	19.7	10.4	14.9	6.16	7.07	6.29	11.5	13.9	15.6	9.3	9.23	8.8	11.9	12.9	10.9	11.2	8.83	5.68	9.54	16.5	9.18
ABLIM2	0.151	0.0183	0.149	0.173	0.146	0.0875	0.18	0.136	0.186	0.0916	0.216	0.223	0.219	0.19	0.189	0.215	0.176	0.0617	0.269	0.257	0.214	0.16	0.191	0.132	0.178	0.138	0.103	0.214	0.156	0.178	0.13	0.113	0.0925	0.0788	0.0707	0.105	0.139	0.114	0.129	0.0442	0.0523	0.0622	0.125	0.11	0.106	0.101	0.163	0.138	0.065
ABLIM3	4.93	0.843	2.79	1.02	6.77	0.82	0.468	0.509	0.674	0.82	0.382	1.58	0.667	1.98	1.1	0.666	2.07	3.04	0.367	0.778	3.13	0.61	0.394	0.343	1.29	2.93	1.07	1.23	1.03	0.591	1.13	2.55	1.52	2.15	2.62	0.513	0.452	0.452	1.5	2.67	1.61	0.124	2.2	0.144	0.938	1.08	1.35	0.824	0.838
ABO	0.577	0.69	0.384	0.072	0.608	1.5	0.328	0.177	0.351	0.338	0.19	0.393	0.178	0.0559	0.145	0.504	0.197	1.05	0.492	0.438	0.0247	0.234	0.234	0.17	0.342	0.0272	0.132	0.203	0.338	0.138	0.152	0.148	0.0894	0.0603	0.0108	0.285	0.505	0.891	0.248	0.0728	0.267	0.0463	0.236	0.099	1.39	0.28	0.235	0.221	0.0159
ABP1	3.4	2.32	0.0555	0.0156	2.7	0.0554	1.45	0.0747	0.0914	0.918	0.101	1.37	5.82	0.16	0.217	0.523	0.722	0.703	0.464	1.02	0.0964	0.263	0.578	1.79	3	0.106	1.87	1.14	0.0474	0.0514	0.037	2.99	0.0388	0.157	0.921	0.0479	0.441	1.08	2.16	0.0338	0.0625	0.0134	0.194	0.305	0.139	2.54	0.0306	0.954	1.49
ABR	25.8	25.9	29.5	31.9	41.7	27.5	18.4	22	19.6	19.9	17.3	20.6	24.1	24.3	20.4	18.1	24.6	39.1	22.6	21.5	26	30.2	17.1	24.6	21.9	26.1	35.7	13.3	19	20.2	20.9	19.2	20.4	29.1	24.8	15.6	14.6	24.3	25.4	34.9	34.6	17	27	15.5	25.4	22.9	26.8	19.1	17
ABRA	0.0189	0.0107	0.00816	0	0	0.014	0.016	0.012	0.0313	0.0277	0.0121	0.0092	0.047	0.0128	0.0207	0.0049	0	0	0.0141	0.0167	0	0.0244	0.0201	0.0122	0	0.0234	0.0302	0.0166	0.0114	0.017	0.0163	0.00707	0.0171	0.00865	0.0372	0.0106	0.00965	0.00888	0.0211	0.0119	0.00612	0.0295	0.00398	0.00757	0.0244	0.0111	0.0154	0.0115	0.0228
ABRACL	26.7	48.4	30.5	26	24.5	28.4	46.7	39.1	29.8	39.5	46.3	47.6	42.8	39.2	43.7	35.9	43.5	33.8	33.9	31	49	33.2	37.3	28.4	34.4	27.8	26.2	42.8	33.5	22.7	38.2	61.6	42.1	44	29.5	45.9	41.6	42.9	40.7	29.4	30.2	34.3	31.7	39.8	27.2	32	42.8	69.4	37.3
ABT1	14.7	13.3	13.3	14	14.1	12.8	14.7	16.5	13.2	12.5	15.4	18.2	19.6	18.6	18.4	19.4	18.2	14.8	22.6	18.1	23.5	14.4	15.9	12.3	15.3	14.2	15.9	14	14.8	14.6	15.6	20.2	20.2	18.2	10.9	16.8	15.3	19.3	19.1	11.6	12	13.4	15.9	16.2	11.9	13.8	12.5	17.6	14.9
ABTB1	449	441	382	803	1010	518	162	494	474	251	215	316	389	447	312	302	392	774	265	205	629	423	201	462	295	668	989	77.6	191	163	145	298	551	806	405	197	104	361	398	518	566	147	229	152	282	313	198	289	118
ABTB2	1.07	1.39	0.804	1.01	0.892	0.839	0.555	0.914	0.526	0.7	0.683	0.719	0.705	0.836	0.701	1.16	1.41	1.64	0.812	1.34	0.442	0.963	0.628	0.698	1.1	0.647	1.15	0.509	0.994	0.856	1.1	1.16	1.21	1.29	1.07	1.12	0.806	1.67	2.85	1.99	1.6	1.51	1.6	0.786	1.33	1.42	0.639	1.04	0.641
ACAA1	65.3	71	50.1	89.3	89	86.5	51.2	65.5	54	55.2	41.9	56.8	57.3	73.5	49.2	52	56.4	143	64.7	45.6	96.5	54	43.3	71.7	51.5	72.6	98.2	32.9	41.1	38.4	38.4	52.2	85.3	73.5	54	44.4	36.2	76.1	60.5	67	73.5	42.5	54.6	46	49.1	62.3	45.4	56.6	46.5
ACAA2	8.71	7.39	8.26	5.88	10.4	5.68	10.4	9.7	6.57	8.66	9.19	11.7	12.7	10.6	9.1	10.1	12.5	10.2	11	9.79	8.7	8.73	10.3	8.44	6.56	6.3	7.58	8.96	10.4	10.8	7.72	12.9	11.1	9.05	4.22	8.92	9.16	9.86	10.6	6.43	6.71	9.09	11.7	11.4	7.02	12	9.62	7.55	12.3
ACACA	0.744	0.712	1.15	0.649	0.895	0.632	0.97	0.738	0.843	0.758	1	0.869	0.871	0.809	0.895	0.915	0.839	0.636	0.789	1.15	0.725	1.01	0.857	0.751	0.718	0.714	0.599	1.15	1.14	1.1	1.2	0.757	0.759	0.456	0.728	0.843	1.04	0.866	0.819	0.808	0.77	0.899	1.05	0.772	0.858	0.811	1.22	0.866	0.835
ACACB	1.08	0.443	1.2	1.64	0.91	1.2	1.21	1.03	2	0.97	1.59	1.25	1.15	1.3	1.12	2.06	0.935	0.934	0.901	1.97	1.32	1.31	1.57	1.05	1.56	1.19	1.08	1.16	1.68	1.36	1.39	0.744	0.817	0.672	0.87	1.47	0.853	2.22	1.29	0.832	1.1	0.826	1.27	1.06	1.24	0.947	1.09	1.26	0.787
ACAD10	6.11	5.77	6.13	5.95	6.2	6.02	5.59	5.63	6.09	5.03	5.77	5.13	6.02	6.71	5.86	5.91	5.35	7.56	5.45	6.67	7.67	6.08	5.51	5.82	5.55	6.5	7.04	4.84	5.83	5.26	5.29	4.82	7.44	5.79	6.89	5.74	4.89	6.69	5.77	6.34	6.89	5.97	6.51	5.84	5.52	6.25	6.08	6.97	5.75
ACAD11	1.78	2.29	3.17	2.58	1.66	3.01	4.21	3.48	4.99	3.03	4.4	3.25	3.14	2.05	3.05	2.78	2.91	1.89	4.36	3.65	2.16	2.76	4.17	3.83	3.33	2.02	2.16	3.74	3.48	4.13	2.4	2.78	1.95	2.01	3.05	4.59	4.1	2.97	3.14	2.28	2.01	3.94	1.92	4.08	4.16	2.39	3.47	4	3.64
ACAD8	8.27	7.78	8.64	7.91	13.8	10.3	9.35	8.47	8.71	7.42	10.1	8.66	8.94	8.17	7.8	9.58	8.29	9.55	10.1	8.78	8.84	7.72	7.97	8.83	8.2	7.18	9.12	7.78	7.29	9.33	6.98	7.62	6.83	7.84	6.73	8.52	7.77	9.17	9.87	7.44	7.8	7.92	7.98	8.71	7.29	7.62	8.07	8.39	7.88
ACAD9	5.32	4.88	6.09	4.37	5.35	4.66	6.12	5.39	5.25	6.11	7.27	5.81	6.79	8.38	6.61	6.68	6.1	6.27	7.68	7.94	8.53	5.77	6	5.48	5.45	9.69	4.18	5.48	6.54	6.7	11.2	6.01	8.35	4.47	4.3	5.75	6.49	7.19	5.88	4.81	4.7	6.27	6.94	6.08	5.18	7.34	6.92	6.33	7.35
ACADL	0	0	0	0	0.0101	0.00771	0	0	0.0148	0	0.00893	0	0	0	0	0.00542	0	0	0.0156	0.0037	0	0	0	0.0179	0.00387	0	0	0.00734	0	0	0	0	0	0	0	0	0	0	0	0	0	0.00326	0	0	0	0	0.0128	0.0191	0
ACADM	3.28	7.9	4.01	4.95	3.14	5.65	8.41	6	6.25	7.69	7.27	5.04	4.02	4.19	5.16	6.23	4.8	3.47	4.72	5.27	3.3	4.82	6.03	5.91	6.31	5.3	3.39	10.1	7.52	6.68	7.63	9.53	6.44	4.83	7.37	7.78	9.28	3.78	4.73	5.39	4.58	9.46	4.91	9.19	5.82	7.35	6.42	7.25	9.04
ACADS	6.4	4.81	6.04	4.86	5.8	4.6	5.23	4.31	4.29	5.68	6.6	6.29	7.95	10.3	5.85	6.73	5.49	6.01	9.52	7.54	7.98	4.76	6.62	4.63	4.92	4.39	4.15	3.82	6.02	6.82	5.26	6.84	10.7	6.15	3.88	5.4	6.54	6.84	5.97	4.04	4.78	5.05	8.05	6.33	4.47	7.62	5.03	6.52	7.28
ACADSB	0.956	0.982	1.49	1.65	0.732	1.39	1.84	1.69	2.15	1.86	1.69	1.52	0.93	0.904	1.59	1.66	1.38	0.565	1.62	1.48	0.726	1.4	2.01	1.46	1.96	1.08	1.37	2.75	1.86	1.77	1.52	1.3	1.07	0.77	1.89	1.99	2.15	0.931	1.12	1.57	1.23	1.67	1.16	1.56	2.06	1.23	1.38	1.08	1.15
ACADVL	56.8	59.9	64.5	49.7	98.1	54.5	57.9	43.3	55	71.6	69.4	61.6	76.7	89.5	66.4	62.5	70.9	76.6	93.3	71.4	91.1	58	45.2	67	52.4	72.8	74.4	44.3	55.9	66.6	59	46.3	66.6	67.7	29.8	44.4	32.6	94.9	80.2	57.6	50.8	60.8	71	51.2	47.5	65.2	57	47.8	57.2
ACAN	0.00295	0.00666	0.0153	0.00857	0.00858	0.00652	0.00997	0.0242	0.00558	0.00518	0.0201	0.00287	0.0147	0.022	0.00807	0.0137	0.013	0.00306	0.00659	0.0136	0.00221	0.00761	0.0073	0.00633	0.0208	0.00727	0.0047	0.0166	0.0071	0.00706	0.00339	0.0154	0.00532	0.00808	0.00773	0.00986	0.00301	0	0.00657	0	0.00954	0.00735	0.00495	0.00354	0.00457	0.00172	0.00841	0.00898	0.00711
ACAP1	111	118	88.8	100	173	112	83.8	73.4	74.3	81.2	92.9	90.9	104	144	91.8	106	82.7	183	118	108	154	80.1	86	93.7	109	120	122	72.6	63.1	90.9	87.5	81.9	146	127	94.2	81.6	67.6	138	110	78.6	110	70.7	106	77.7	101	91.9	80.3	114	79.9
ACAP2	19.1	24.2	21.4	29.4	31.7	38.9	18.8	22.9	24	24.7	12.7	17	12.2	12	19.3	13.8	19.3	24.3	11.9	12.5	12.3	32.3	17.8	28.4	24	31.1	45.1	17.9	19.4	16.3	16	16.8	14.7	19.9	35.5	18.7	13.4	14.8	15.1	51.3	40.5	24.9	14.1	16.7	30.6	20.2	20.3	17.2	12.7
ACAP3	13	12.9	14.4	14.4	15.1	11.7	10.3	12.4	12.2	13.1	12.8	12.5	15.1	19.3	14.8	14.7	10.3	13.3	21.8	15.2	15.8	11.6	11.6	12.5	12.7	11.9	10.1	7.36	8.66	12.8	10.4	11.5	11.9	11.7	8.62	12.1	10.5	18.8	14.5	8.41	11.9	12.1	16.4	10.3	11.1	14.4	11.4	17.1	11.8
ACAT1	3.83	7.77	2.32	4.17	3.55	4.47	5.55	5.56	4.14	5.88	5.92	5	4.66	6.69	3.84	4.58	5.4	3.79	6.93	3.81	5.34	4.77	5.21	5.78	5.15	4.4	3.08	5.13	6.43	5.34	7.16	10	9.89	6.47	4.31	5.6	6.15	4.34	3.35	3.32	4.01	6.86	3.72	7.93	4.82	7.01	6.17	4.88	9.25
ACAT2	7.74	8.91	5.82	5.61	7.22	5.76	9.05	7.47	5.76	8.12	8.69	8.55	9.7	11.7	7.42	7.73	8.97	7.96	8.77	9.42	10.2	7.26	8.24	6.98	7.69	7.64	5.54	10.6	9.45	6.84	11.3	11.6	13.8	9.73	7.49	10.3	8.45	9.79	9.57	5.94	5.23	9.33	8.35	8.37	7.03	6.26	8.16	9.27	10.2
ACBD3	5.21	5.31	5.53	6.86	5.78	7.01	6.83	6.89	6.4	6.81	5.38	6.47	4.29	3.49	5.72	5.96	6.35	5.34	4.83	5.93	3.67	7.96	6.45	6.75	5.86	6.63	7.99	7.62	7.31	6.53	7.59	5.93	4.52	6.57	7.8	6.52	7.07	4.54	4.97	9.08	7.21	8.74	5.47	6.51	7.21	5.76	8.72	5.24	6.79
ACBD4	4.53	3.98	4.31	4.12	3.99	4.36	5.13	4.24	4.7	3.97	6.03	5.31	5.5	6.03	5.73	6.47	3.49	4.29	6.8	6.47	4.76	3.98	5.55	4.48	5.25	4.64	3.62	3.84	4.77	4.77	4.01	4.17	4.71	4.01	4.03	5.23	4.66	5.39	4.64	3.02	3.56	4.48	4.48	4.52	4	4.31	4.21	6.42	4.74
ACBD5	4.23	4.68	4.3	5.23	4.57	5.71	5.46	4.88	5.37	5.42	4.31	4.51	4.11	2.87	4.46	3.85	4.69	3.92	4.92	3.79	2.9	5.49	5.12	6.13	5.34	4.71	7.17	5.67	5.31	6.13	5.04	4.63	3.72	4.57	5.01	4.6	5.7	3.05	4.16	7.55	5.98	5.88	4.51	5.54	6.27	5.78	5.28	4.09	5.13
ACBD6	4.53	3.92	5.38	5.18	4.07	5.08	4.84	5.4	4.71	5.8	6.02	6.14	6.8	8.06	5.52	6.53	6.39	5.05	5.82	6.23	7.92	4.44	5.95	4.32	4.9	4.32	4.72	6.87	6.14	5.59	6.64	6.31	8.72	4.23	4.04	5.82	5.98	5.56	6.01	4.35	3.7	5.02	6.08	6.35	3.89	5.78	6.39	7.24	5.31
ACBD7	0.00773	0.114	0.02	0.304	0.0825	0.131	0.0294	0.0733	0.183	0.0226	0.0462	0.0263	0.0128	0.0419	0.0508	0.0441	0.0194	0.0482	0.0173	0.0492	0.0289	0.0399	0.0383	0.0531	0.0773	0.254	0.425	0.0787	0.0341	0.0278	0.0889	0.0636	0.0419	0.141	0.106	0.0561	0.0184	0.029	0.0301	0.0682	0.065	0.0892	0.0682	0.0897	0.0439	0.0316	0.0473	0.0565	0.0373
ACCS	4.05	2.6	12.7	10.5	9.62	3.05	4.8	4.08	4.58	5	4.97	4.68	3.89	3.86	4.14	5.2	3.06	12.2	5.64	3.69	5.51	2.54	3.88	2.72	4.61	2.76	3.58	12.7	10.4	4.77	3.69	3.35	4	2.73	3.31	5.74	5.64	5.3	3.9	9.98	13.7	3.82	5	15	3.54	3.5	11.2	3.38	4.24
ACCSL	0.0429	0.0162	0.0185	0.0625	0.333	0.0317	0	0	0	0.0419	0.0245	0.0279	0	0.0194	0.0235	0.0148	0.036	0.164	0.0107	0.0101	0.0429	0.0185	0	0	0.0212	0.0707	0.0228	0.0402	0	0.0429	0.0165	0.0642	0.0259	0.0262	0.0657	0	0.0146	0	0.0319	0.018	0.0371	0.00446	0.00602	0.0115	0.0222	0	0.0233	0.0174	0.0138
ACD	12.5	7.1	10.7	9.79	13.7	8.52	8.91	8.3	9.04	8.71	11	10	12.9	14.3	10.5	10.4	10.5	14	13.3	13	19.6	10.3	8.83	8.34	9.26	10.8	9.38	6.49	8.52	10.1	9.04	9.61	16.2	9.9	8.06	8.04	6.84	13	12.5	7.3	9.01	8.64	11.1	8.37	7.08	9.4	8.31	9.73	9.7
ACE	0.529	0.192	0.301	0.323	0.305	0.195	0.817	0.309	0.338	0.547	0.712	0.471	0.629	0.745	0.602	1.16	0.559	0.405	0.774	1	0.224	0.245	0.633	0.39	0.94	0.271	0.0915	0.848	0.461	0.921	0.434	0.28	0.419	0.0867	0.366	0.599	0.428	0.72	0.723	0.33	0.368	0.629	0.634	0.435	0.402	0.476	0.973	0.645	0.795
ACE2	0.0149	0.042	0.00641	0.0378	0	0.0493	0.0189	0.0423	0.0563	0.0131	0.00634	0.00361	0	0.0101	0.00407	0	0.0187	0.00772	0.0222	0.00788	0.00556	0.0192	0.0158	0.0446	0.00275	0.0428	0.0888	0.0104	0.00894	0.0223	0	0.0111	0.00671	0.0339	0.073	0.0207	0.0253	0.0105	0.0166	0.0234	0.0192	0.00463	0.0125	0.00297	0.0499	0.00869	0	0.00905	0
ACER1	0.168	0.325	0.403	0.557	0.325	0.283	0.446	0.348	0.385	0.168	0.46	0.0815	0.258	0.52	0.302	0.496	0.196	0.149	0.25	0.356	0.179	0.206	0.585	0.206	0.373	0.433	0.286	0.37	0.394	0.359	0.358	0.179	0.173	0.219	0.314	0.321	0.179	0.607	0.253	0.332	0.294	0.246	0.342	0.412	0.309	0.196	0.361	0.627	0.162
ACER2	0.174	0.062	0.106	0.179	0.0709	0.135	0.162	0.139	0.281	0.112	0.168	0.111	0.0908	0.0186	0.07	0.151	0.126	0.0095	0.116	0.171	0.0205	0.0983	0.285	0.149	0.21	0.158	0.0947	0.269	0.165	0.137	0.168	0.0751	0.00825	0.0751	0.234	0.214	0.189	0.0515	0.0916	0.132	0.0946	0.168	0.146	0.0877	0.179	0.107	0.194	0.139	0.0881
ACER3	2.29	3.06	2.34	1.71	2.21	2.87	2.58	1.65	2.12	3.7	1.91	2.44	2.29	2.11	2.31	1.63	2.31	2.99	2.36	2.06	1.48	2.64	2.1	2.68	2.71	2.41	2.23	2.67	2.72	2.29	2.26	1.92	1.46	1.38	2.61	2.25	2.27	2.56	1.89	4.15	2.56	3.05	2.61	2.28	3.35	3.45	3.04	2.63	2.04
ACHE	1.84	2.55	0.0608	0.192	0.239	0.403	0.112	0.123	0.025	0.155	0.222	0.167	1	0.323	0.116	0.0776	0.26	0.147	0.473	0.0467	0.0528	0.0341	0.0343	0.0189	0.15	0.152	0.0983	0.118	0.046	0.153	0.0608	0.922	0.271	0.105	0.11	0.0835	0.0719	0.0248	0.304	0.0666	0.188	0.0275	0.0148	0.0352	0.305	0.103	0.111	0.0966	0.11
ACIN1	41.9	42	34.6	46.9	53.9	46.5	35.1	35.7	45.1	34	34.6	32.6	34.1	32.2	34.8	33.9	36.6	49.9	34.8	38.7	38.9	46.1	33.3	41.3	38.1	43	54.8	31.4	35.4	34	35.8	35.2	36.8	45.4	52.6	33.9	30.7	46.1	40.9	54.2	55.3	33.7	37.7	34	41.3	36.6	37.6	35	33.7
ACLY	19.7	11.7	22	17.1	25.1	13.3	16.3	10.9	11.7	15.9	13.7	16.7	16.7	18.5	14.4	14.5	19.7	22.2	16.4	22.9	23.1	24	13.8	14.1	15.5	18.8	18.6	16.2	20.1	21	22.3	12.4	19	17.4	16.4	13	15.5	15.9	17.8	27.5	22.7	17.6	23.2	14.1	18.6	15.3	22.6	11.4	16.2
ACMSD	0.146	0.259	0.135	0.212	0.0605	0.138	0.158	0.145	0.187	0.232	0.311	0.243	0.293	0.212	0.148	0.205	0.157	0.0865	0.279	0.169	0.109	0.233	0.302	0.357	0.278	0.154	0.199	0.285	0.175	0.199	0.0838	0.187	0.169	0.266	0.246	0.244	0.184	0.176	0.197	0.21	0.189	0.182	0.131	0.142	0.194	0.231	0.212	0.292	0.231
ACN9	2.09	4.05	2.04	2.75	2.87	4.36	3.46	3.59	4.08	2.86	3.01	2.63	2.25	2.15	3.89	4.16	2.83	3.54	1.94	2.02	1.92	2.08	3.13	3.15	2.38	4.86	4.21	5.12	2.7	2.73	2.02	3.35	2.7	2.86	2.68	4.22	3.71	2.74	2.63	2.83	2.79	2.31	1.74	3.68	2.38	2.05	1.89	3.81	2.31
ACO1	4.59	3.38	2.79	3.1	2.71	2.04	2.5	1.44	2.1	2.29	1.85	2.17	2.48	2.81	1.91	1.89	2.44	2.74	2.11	2.8	2.99	2.77	2.23	2.13	2.04	1.96	2.18	2.62	3.24	3.26	3.19	5.57	3.28	2.78	11.1	3.03	3.54	3.03	3.73	8.92	7.22	7.9	3.56	3.58	8.77	7.83	3.07	2.61	2.82
ACO2	18.7	14.3	21.3	13.2	20.8	11.8	15	10.7	9.39	16.3	16.1	15.2	22	25.6	13.9	14.9	17.7	23.6	17.8	23.9	24	17.8	11.8	11	12.5	15.2	11.4	15.1	18.1	16.8	19.7	14.3	25	14.4	12	11.9	13.8	18.9	17.1	14.5	16.3	15.4	20.9	14.5	12.2	19.2	20.1	12.6	18.7
ACOT1	0.0162	0.0184	0.035	0.0118	0	0.024	0.0413	0.0925	0.0154	0.0286	0.0347	0.0158	0.0404	0.0441	0.0089	0.059	0.0817	0.0338	0.0485	0.0402	0.0852	0.035	0.0345	0	0.012	0.0267	0.0648	0.0456	0.00652	0.039	0.0561	0.0365	0.0294	0.0149	0.0533	0.0272	0.0221	0.0534	0.0543	0	0.0316	0.0456	0.0341	0.013	0.042	0.019	0.0199	0.0198	0.0314
ACOT11	0.215	0.443	0.54	0.168	0.335	0.0964	0.169	0.277	0.171	0.311	0.285	0.389	0.433	0.432	0.223	0.641	0.541	0.359	0.624	0.516	0.587	0.628	0.324	0.188	0.646	0.145	0.172	0.248	0.228	0.226	0.225	0.103	0.174	0.14	0.0755	0.261	0.131	1.38	0.488	0.305	0.119	0.148	0.326	0.141	0.262	0.225	0.357	0.243	0.1
ACOT12	0.0131	0.0148	0.00565	0.0191	0.0254	0.0677	0.0111	0.0497	0.0248	0.00767	0.00559	0	0	0	0.00717	0.0611	0	0.0409	0.0488	0.00927	0	0.00564	0.0464	0.0112	0.0146	0	0.0104	0.0138	0.021	0.00785	0.0226	0.0098	0	0	0.0515	0.0146	0.00891	0.0246	0.0292	0.0165	0.017	0.0122	0	0.00524	0.0338	0	0.0107	0.0239	0.00632
ACOT13	5.21	8.88	4.23	5.55	6.12	7.34	5.9	5.7	5.78	5.49	4.09	4.28	3.76	4.55	4.6	4.2	4.37	7.21	4.01	3.9	3.83	4.3	4.46	6.06	5.06	7.44	8.63	5.33	5.37	4.36	4.72	5.82	7.23	5.79	6.82	5.03	4.88	5.03	4.93	8.77	7.37	6.49	4.34	5.76	5.22	6.7	4.6	5.37	6.65
ACOT2	0.857	0.84	0.759	0.981	0.598	0.885	0.918	0.867	0.833	0.817	1.19	1.17	0.805	1.32	1.03	1.26	0.927	0.345	1.3	1.26	0.796	0.816	1.08	0.662	0.877	0.602	0.547	1.11	0.894	1.34	1.1	0.872	1.14	0.867	1.01	1.15	1.19	0.891	1.06	0.612	0.525	0.741	1.12	0.996	0.614	0.788	0.955	1.28	1.37
ACOT4	0.463	0.487	0.592	0.337	0.526	0.448	0.797	0.515	0.234	0.458	0.654	0.808	0.661	0.563	0.507	0.786	0.682	0.183	1.14	0.666	0.43	0.158	0.56	0.343	0.414	0.118	0.42	0.594	0.461	0.909	0.643	0.513	1.12	0.642	0.272	0.641	0.624	0.63	0.791	0.282	0.176	0.438	0.564	0.447	0.429	0.691	0.547	0.447	0.885
ACOT6	0	0	0	0	0	0	0	0.0328	0	0.0456	0.0111	0.0252	0	0	0	0.0403	0.0163	0.027	0	0	0	0.0112	0.00919	0.0111	0	0	0	0.00911	0.0104	0	0	0	0	0.0237	0.017	0	0.0176	0	0	0.0654	0	0	0.0109	0.0104	0	0	0	0	0.025
ACOT7	2.01	1.44	1.67	0.96	2.47	1.1	1.81	1.12	0.666	1.3	1.59	1.22	2.55	2.23	1.51	1.52	1.84	1.1	2.72	1.92	3.34	1.3	1.22	1.13	1.16	0.825	0.956	1.22	1.16	1.84	2.51	3.46	3.48	3.59	0.994	1.05	1.21	1.59	1.68	1.14	1	1.52	3.07	1.59	1.23	2.05	2.83	1.33	3.59
ACOT8	18.1	17.5	13.6	17	20.5	14.9	14.4	16.4	13	12.9	14.9	15.4	19.6	23.2	16.9	16.5	15.7	24.2	19.9	16	28.5	14.6	13.6	15.3	12.8	16.5	19.8	12.6	15.6	14.1	13.1	19.2	30.6	24.4	13.8	13.4	14.2	21.1	17.3	14.2	15.5	14.2	17.4	15.6	12.5	19.1	13.3	17.5	17.2
ACOT9	30.8	47.1	20.6	16.2	29.6	25.9	21.4	16.2	13.4	19.3	14.7	19.7	20	19.3	14.1	11.9	21.9	24.9	18.7	18.6	24.8	21.2	18	18.8	18.7	16.9	33.3	14.7	17.3	22.6	23.6	30	49.8	35.8	46.1	30	21.3	26.1	28.9	51.8	48.5	37.4	30.9	28.6	38.3	38.2	25.4	23.3	24.7
ACOX1	15.5	17.2	21.7	25	42.5	27.7	10.2	15.3	21.8	14.4	8	13.2	11.8	12.7	9.59	9.64	20	27.6	6.59	8.51	18.8	21.6	8.34	20	12.2	26	49.5	7.35	9.73	9.9	9.12	10.8	12.1	27.6	20.7	8.42	6.44	14.1	18.8	41.3	31.4	12	11	7.99	16.5	12.8	11.5	11.5	6.38
ACOX2	0.102	1.57	0.136	0.0656	0.0985	0.0749	0.0525	0.171	0.0855	0.159	0.135	0.0933	0.122	0.184	0.13	0.0526	0.142	0.352	0.135	0.0918	0.194	0.0826	0.0519	0.063	0.0794	0.121	0.117	0.0554	0.0951	0.0811	0.162	0.11	0.194	0.165	0.214	0.0881	0.134	0.207	0.0943	0.107	0.0657	0.172	0.171	0.126	0.07	0.211	0.166	0.131	0.136
ACOX3	2.32	2.52	2.83	2.06	3.02	2.16	2.07	1.79	2.06	2.68	2.97	2.18	2.97	2.99	2.05	2.28	2.29	3.02	2.34	3.16	3.77	3.06	2.21	1.96	2.09	2.25	2.51	2.19	2.33	2.34	2.83	2.43	2.73	2.39	2.27	2	2.63	2.84	2.31	2.65	2.16	2.47	2.66	1.99	2.26	2.68	3.43	1.94	2.57
ACOXL	0.187	0.546	0.218	0.295	0.17	0.243	0.0697	0.111	0.114	0.122	0.113	0.0694	0.0819	0.127	0.12	0.0797	0.117	0.24	0.156	0.144	0.173	0.132	0.132	0.156	0.11	0.217	0.236	0.0732	0.0925	0.151	0.265	0.238	0.446	0.421	0.345	0.178	0.138	0.067	0.202	0.443	0.824	0.572	0.152	0.141	0.21	0.334	0.421	0.214	0.477
ACP1	13.2	26.8	9.18	9.23	7.25	13.6	12.4	12.7	11	14.2	14.1	12.8	16.9	10.6	12.8	13	13.3	7.39	14.9	10.5	10.9	7.66	12	10.5	11.2	7.75	7.35	16.2	10.7	11.7	12.2	16.7	13	10.3	9.56	13.4	14.4	11.2	14.5	6.62	6.8	11.3	9.31	13.9	11.9	12.3	9.57	14.5	12.4
ACP2	7.35	5.76	8.48	4.29	6.19	3.47	6.75	4.87	4.22	6.81	7.43	5.46	9.16	9.77	5.55	5.5	6.16	7.26	7.34	6.91	7.52	6.64	6.25	6.15	3.57	3.55	5.33	5.51	5.64	8.65	6.58	6.9	12.4	6.3	4.96	5.65	7.01	6.64	5.03	7.41	6.52	7.77	9.93	9.01	5.57	12.9	11	6.27	11.1
ACP5	17.5	16.7	11.9	7.14	6.09	12.7	19.8	11.5	8.42	14.6	12.5	18.5	14.1	13.6	14.3	17.5	15.2	12.5	10.9	13.1	29.5	11.3	11	7.78	15.1	14.6	5.77	13.7	16	14.1	17.5	20.6	18.4	16.3	12.6	17.8	13.2	11.8	10.4	7.25	6.81	12.4	14.7	12.2	8.25	29.2	11.7	8.92	26.7
ACP6	2.23	4.43	2.13	3.2	3.21	3.37	2.65	3.64	3.22	1.92	2.71	3.04	2.14	3.4	2.41	3.38	2.31	3.25	2.79	2.66	3.51	2.67	3.25	3.18	2.88	2.48	3.63	2.56	2.78	2.32	2.06	2.09	2.45	4.71	2.49	3.09	2.32	3.24	2.52	2.81	2.53	2.24	2.7	2.24	2.13	1.79	2.26	2.89	2.15
ACPL2	1.62	3.55	2.27	17.6	5.19	7.81	2.32	7.56	4.98	3.58	2.2	2.03	1.89	1.59	2.31	4.21	2.69	6.27	3.99	1.77	1.79	3.63	2.65	4.47	3.69	4.6	7.72	3.68	3	3.06	2.7	2.58	1.7	6.95	4.13	3.35	3.54	2.7	2.28	9.75	3.38	3.29	2.14	2.67	3.73	4.36	3.77	2.04	2.77
ACPP	3.8	4.17	5.61	7.45	5.94	6.92	2.4	2.7	2.74	5.42	2.69	5.33	3.14	3.14	5.76	3.04	8.12	5.02	2.72	3.68	5.47	6.26	2.44	3.59	4.66	6.87	8.75	2.58	2.59	2.62	2.77	2.56	3.14	2.91	2.59	2.39	2.46	4.11	4.72	6.4	5.52	3.07	4.44	2.66	4.87	4.7	2.89	2.71	1.81
ACPT	0.0387	0.0219	0.025	0.0281	0	0	0.0491	0.0489	0.0824	0.0227	0.0578	0	0.016	0.0393	0.0106	0.0802	0.0122	0	0.0288	0.0616	0.0724	0.0333	0.0274	0.0249	0.0287	0	0.0154	0.0136	0.0233	0.0579	0.0334	0	0.0175	0.0177	0	0.0216	0.0526	0.0363	0.0108	0.0122	0.0125	0.0181	0.0244	0.0464	0.00999	0.0339	0.0394	0.0825	0.00933
ACR	0	0	0	0	0	0	0	0	0.018	0.0111	0	0	0	0	0	0	0	0	0	0	0	0	0	0	0	0	0	0	0	0	0	0	0	0	0	0	0	0	0	0	0	0	0	0	0	0	0	0	0
ACRBP	17.4	9.36	11.4	5.94	19.1	6.62	6.38	5.66	6.49	7.67	6.68	7.86	10.3	13.2	10.1	6.34	9.66	15.3	5.08	7.07	14	5.98	5.51	6.1	7.05	12.7	11.9	6.54	6.09	5.69	7.44	15.6	9.01	11.5	10.5	6.07	4.32	9.8	10.5	10	11.1	4.75	10.7	5.52	6.69	8.05	8.58	11.4	8.99
ACRC	0.926	0.871	0.969	1.44	1.3	2.54	1.84	0.97	2	1.35	1.38	0.925	0.917	0.662	1.19	1.24	0.927	1.65	1.12	0.893	0.651	0.893	0.92	1.31	1.08	1.52	1.66	1.08	0.967	1.15	0.82	0.993	0.592	1.06	1.36	0.965	0.984	1.15	1.28	1.13	1.49	0.986	0.847	0.98	1.3	0.714	1.29	0.949	1.2
ACRV1	0.0222	0	0.00956	0	0	0	0.0188	0	0.0105	0.039	0.0379	0	0	0	0	0	0	0.0231	0.0165	0.0157	0.0166	0	0	0.0286	0.00822	0	0	0.00778	0	0.0664	0	0.0497	0.0601	0.0608	0	0.0247	0.00754	0.0104	0.0123	0	0.0287	0.0276	0.0559	0.00887	0.0229	0	0.0271	0	0.0107
ACSBG1	0.262	0.0988	0.17	0.0954	0.67	0.116	0.0814	0.0995	0.0579	0.143	0.116	0.145	0.123	0.243	0.115	0.118	0.143	0.282	0.111	0.114	0.419	0.109	0.0805	0.0488	0.185	0.18	0.167	0.181	0.0877	0.0943	0.146	0.379	0.0869	0.224	0.292	0.0829	0.134	0.0452	0.161	0.182	0.136	0.06	0.129	0.035	0.104	0.0511	0.118	0.197	0.131
ACSBG2	0.0288	0.0869	0.0373	0.0349	0.0186	0.0638	0.0406	0.0729	0.0682	0.045	0.082	0.0467	0.0159	0.0195	0.0631	0.0299	0.0181	0.04	0.0501	0.0272	0.00719	0.0248	0.0612	0.0536	0.0463	0.0316	0.0306	0.0978	0.0501	0.0173	0.0332	0.00718	0.0174	0.0615	0.063	0.0697	0.0523	0.018	0.0321	0.0726	0.0249	0.0539	0.0606	0.073	0.0248	0.0618	0.047	0.0995	0.0371
ACSF2	4.12	4.08	4.78	2.46	3.41	2.22	4.44	2.92	2.3	2.8	3.58	3.27	6.6	5.52	3.52	4.43	3.49	3.87	5.4	4.35	6.93	4.11	3.62	3.12	3.74	2.58	2.39	3.16	3.3	3.83	4.06	3.17	3.93	4.48	2.53	3.78	3.08	7.17	4.44	2.88	3.84	4	5.56	3.5	3.8	2.99	3.46	3.27	4.73
ACSF3	4.77	5.22	4.89	4.14	4.24	3.85	4.27	4.14	3.79	4.67	4.71	5.96	6.87	7.07	4.49	6.04	4.64	4.26	7.2	5.5	7.19	4.39	4.87	4.37	4.68	3.94	3.27	4.56	4.59	5.75	4.94	5	9.55	4.37	3.74	4.69	4.76	5.03	4.83	3.07	3.68	5.2	5.38	5.66	4.5	5.55	5.55	4.54	6.35
ACSL1	444	408	266	557	790	771	277	383	384	210	92.2	241	233	166	192	155	350	701	125	134	254	392	155	499	240	1180	1280	87.9	111	157	136	176	181	553	905	150	171	286	266	928	623	201	208	187	442	374	322	159	190
ACSL3	5.07	6.25	4.71	5.49	8.22	6.39	4.41	5.92	5.24	5.28	3.87	4.29	3.92	3.48	3.9	3.47	5.49	8.56	3.07	3.54	4.45	7.51	3.6	5.69	4.72	7.34	9.04	4.85	4.83	4.13	4.91	4.08	6.23	7.2	7.99	4.29	5.28	4	4.91	12	8.49	5.53	4.88	3.95	8.54	5.82	5.85	4.2	4.23
ACSL4	13	14	12.4	26.3	18.8	28.7	14.3	19.5	18.2	14.2	6.4	12.1	8.36	5.48	12.2	9.06	12.5	11	10.5	6.73	7.27	17.5	10.3	22.4	13.1	46.1	55.4	10.2	12.9	12.5	10.9	12.6	9.05	22.6	36.8	13.6	10.9	8.87	8.99	49.5	24.2	14	11.5	11.4	24.8	17.2	17.1	9.48	10.7
ACSL5	17.7	11.2	17.4	6.94	13.5	10.8	17.9	12.5	9.75	14.6	13.1	12.6	18.7	15.4	12.6	13	16.2	11.2	19.6	15.5	14	13.5	13.6	11.6	11.3	9.02	8.45	14.7	15.5	20.1	19.2	16.2	13.8	14.8	10.9	13.9	15.1	13.1	15.6	12.8	11.6	14.1	17.2	14.6	15.4	16.3	14.5	12.2	19.1
ACSL6	1.26	3.18	0.785	0.844	0.628	1.91	1.27	0.812	1.02	1.55	1.2	1.05	1.14	1.01	1.37	1.56	0.938	0.599	1.07	1.23	0.389	0.82	1.91	1.35	1.72	1.1	0.73	2.21	1.5	1.39	1.33	0.918	0.755	0.661	1.03	1.34	1.55	0.702	0.862	0.603	1.03	1.18	0.848	0.966	1.28	1.17	1.41	1.52	0.937
ACSM1	0.229	0.0431	0.142	0.102	0.148	0.131	0.188	0.112	0.367	0.32	0.206	0.247	0.305	0.164	0.153	0.408	0.168	0.158	0.265	0.166	0.152	0.202	0.297	0.164	0.278	0.188	0.101	0.183	0.189	0.122	0.27	0.123	0.0918	0.453	0.208	0.361	0.177	0.334	0.276	0.16	0.115	0.218	0.347	0.198	0.348	0.297	0.129	0.379	0.159
ACSM2A	0	0	0	0	0	0	0	0	0	0	0	0	0	0	0	0	0	0	0	0	0.00658	0	0	0	0	0	0	0	0	0	0	0	0	0	0	0.0049	0	0	0	0	0	0	0	0	0	0	0	0	0
ACSM2B	0	0	0	0	0	0.00787	0.00451	0	0.00505	0	0	0	0	0	0	0	0	0	0	0	0	0	0	0	0.00395	0	0	0	0	0.00639	0	0	0	0	0	0	0	0	0	0	0	0	0	0	0	0	0	0	0
ACSM3	0.682	2.21	0.863	0.637	0.629	0.772	0.88	1.06	0.937	1.35	1.38	1.04	0.858	1.16	1.02	1.12	0.751	0.698	0.89	0.998	0.528	0.915	1.13	0.82	1.09	0.608	0.798	1.44	1.12	0.627	0.752	0.765	0.863	0.489	0.626	1.34	0.951	1.74	0.804	0.609	0.765	0.851	0.76	1.19	0.682	0.711	0.658	1.37	1.03
ACSM4	0.0448	0.0507	0.00645	0	0.0145	0.011	0	0	0.0566	0.0263	0.0255	0.00727	0	0.0304	0.00819	0.031	0.00939	0.0466	0.0111	0.0159	0.0224	0	0.00529	0	0.0111	0.0123	0	0.00525	0	0.00896	0	0	0	0.0683	0.0294	0.00834	0.0102	0.014	0	0	0.00967	0.00932	0.0188	0.0179	0.0154	0.0262	0.0244	0.0182	0.0144
ACSM5	0	0	0.00925	0	0.0208	0	0	0.00679	0	0	0.00458	0.0104	0	0	0	0	0	0	0.008	0	0.00803	0.00924	0	0	0	0	0.00855	0.0113	0.00431	0.00643	0.0247	0	0.00969	0	0	0.012	0.0219	0	0.0239	0.0203	0.00694	0	0.018	0.00429	0.0111	0.00627	0.00438	0	0.0104
ACSS1	10.8	8.77	13.9	9.58	11	8.72	13.7	11.8	10.3	11.4	15.4	12.4	16.9	11.1	12.4	14	12.5	9.52	18	15.6	16.4	11.1	13.3	12.2	12.6	8.6	8.36	14.9	12.8	16.1	15.7	13.2	12.3	12.4	9.79	11.5	10.8	16.1	14.7	8.98	9.72	12.3	13.7	12.7	10.5	10.9	14.5	12.1	16.2
ACSS2	17.3	10.9	17.1	10.5	16.6	12.2	9.11	8.24	8.67	11.8	7.94	11.3	12.2	15.9	11	9.24	15.6	25.7	8.69	12.6	20	14.3	8.43	10.8	9.72	14.3	20.9	7.15	9.39	8.41	8.73	7.71	15.1	14.8	10.9	7.42	7.21	15.5	14	16.7	16.1	10.4	12.1	8.9	10.1	10.8	9.47	11.1	5.88
ACSS3	0.0601	0.0194	0.0222	0.0687	0.0333	0.177	0.00363	0.239	0.0488	0.0805	0.0183	0.0251	0.0498	0.0699	0.0329	0.00445	0.0432	0.152	0.0128	0.0182	0	0.192	0.0426	0.0664	0.0255	0.106	0.137	0.0151	0.0965	0.0257	0.0198	0	0.00776	0.0942	0.0957	0.0575	0.00292	0.0202	0.148	0.2	0.0278	0.0134	0	0	0.0488	0.01	0.0245	0.0209	0.00414
ACTA1	0.105	0.0395	0.0301	0.0254	0	0.0901	0.0295	0.0331	0.107	0.0818	0.0745	0.0934	0.0578	0.0473	0.0669	0.0814	0.0329	0.0907	0.117	0.0556	0.0784	0.0451	0.0371	0.0899	0.0776	0.0718	0.0557	0.0429	0.091	0.0627	0.0703	0.0261	0.0473	0.0478	0.0572	0.0195	0.0297	0.0246	0.0583	0.066	0.0339	0.0653	0.066	0.0209	0.027	0.0102	0.0427	0.0213	0.101
ACTA2	10.4	4.19	3.77	6.16	7.74	2.77	5.62	2.62	2.39	2.41	3.74	2.79	3.5	5.16	4.21	2.9	5.89	8.09	4.1	4.17	3.93	2.56	1.64	2.08	2.01	2.24	2.47	2.66	2.73	4.49	3.42	3.18	5.63	12.1	7	3.01	3.43	6.01	3.8	3.64	10	4.04	2.25	4.8	3.89	9.51	3.13	2.74	4.16
ACTB	2070	1220	1940	1720	3440	1200	950	1150	824	1330	1000	1440	1880	1970	1300	1200	2060	3830	1250	1750	3220	2270	783	1130	1010	1600	2290	781	1230	1140	1400	981	2210	1890	1110	751	760	1970	1950	2570	1950	980	1760	843	1050	1230	1170	811	903
ACTBL2	0	0	0	0	0	0	0	0	0	0	0	0	0	0	0	0	0	0	0	0	0	0	0	0	0	0	0	0	0	0	0	0	0	0	0	0	0	0	0	0	0	0	0	0	0	0	0	0	0
ACTC1	0	0	0.00913	0.00513	0.0137	0	0	0	0	0	0	0	0	0	0	0	0.00443	0	0	0	0.0106	0	0	0.00606	0.00261	0	0	0.00743	0	0.00423	0	0.00528	0	0.00645	0	0	0	0	0	0	0	0	0.00296	0	0.00365	0.00412	0.00575	0	0.0034
ACTG1	605	507	640	501	891	398	393	435	320	521	447	548	619	725	477	471	654	1110	485	596	756	636	393	394	344	436	587	357	444	431	518	499	613	659	359	323	316	598	635	591	578	379	557	356	321	411	523	376	388
ACTG2	0.0391	0	0.0929	0.0142	0.019	0	0.0248	0	0.0463	0	0.0585	0.0286	0.0162	0.0664	0.0322	0.0406	0.0246	0.102	0.0292	0.09	0.176	0.0168	0.0347	0.0084	0.0218	0.0322	0.0156	0.0412	0.0314	0.0117	0.135	0.117	0.0707	0.107	0.0385	0.0437	0.0133	0.0276	0.0327	0.037	0.076	0.165	0.0494	0.0157	0.0303	0.0229	0.0878	0	0.0189
ACTL10	0.732	0.596	0.709	0.701	0.523	0.54	0.658	0.422	0.645	0.617	0.9	0.75	0.745	1.18	0.76	1.09	0.452	0.361	1.26	0.872	0.866	0.343	0.71	0.568	0.486	0.359	0.256	0.442	0.469	0.824	0.362	0.682	1.06	0.658	0.312	0.552	0.507	0.477	0.651	0.364	0.574	0.509	0.956	0.524	0.252	0.721	0.644	0.751	0.991
ACTL6A	7.64	9.77	9.18	6.47	6.44	8.07	12.2	9.03	8.64	9.38	12.1	11.3	10.4	11.6	11.4	11.7	10.8	7.87	9.41	12.4	7.62	9.77	11.8	9.04	9.48	7.93	6.7	13.7	10.8	9.81	13	13	10.5	8.76	8.24	11.5	11.5	10.3	10.4	6.9	7.17	11.7	10.2	11.9	8.42	8.52	11.7	10.8	11.1
ACTL6B	0.0169	0	0.0292	0	0	0.025	0.0287	0.0322	0.00802	0.0298	0	0.0247	0.014	0.0115	0.0371	0.0176	0.0107	0.0529	0.0379	0.018	0.0127	0.0146	0.042	0.0291	0.0251	0.0279	0.0541	0.0238	0	0.0203	0	0.0127	0.0153	0.062	0.0333	0.0189	0	0	0.0283	0	0.0219	0.0106	0.0356	0	0.00876	0.0396	0.0346	0.0207	0.0164
ACTL7A	0	0	0	0	0	0	0	0	0.00861	0	0	0	0	0	0	0	0	0	0	0.0129	0	0	0	0.0078	0	0	0.0145	0	0.0073	0	0	0	0.0164	0	0.0119	0	0	0	0	0	0	0	0	0.00727	0	0	0.00741	0	0
ACTL7B	0	0	0.00798	0	0	0	0	0	0.00876	0	0	0.018	0	0	0.0203	0	0	0	0	0	0	0	0	0	0.00686	0	0	0.00649	0.0149	0.0111	0	0.0138	0	0.0169	0	0	0.00629	0	0.0103	0	0	0	0.00778	0.0074	0	0	0	0	0
ACTL8	0	0	0	0	0	0	0.00659	0	0	0	0	0.00758	0	0	0	0.00807	0	0	0	0	0	0	0	0	0	0	0.0124	0	0	0	0.00896	0	0	0	0	0	0	0	0	0	0	0.0146	0	0	0	0	0.0127	0	0.00752
ACTL9	0.0183	0	0.0079	0	0	0	0.00775	0	0.026	0.0215	0.0156	0.0178	0.0152	0.0124	0.0301	0.00949	0	0	0	0.0389	0	0.00789	0.0259	0.0315	0.0204	0	0.0146	0	0.0294	0.0329	0	0	0.0331	0.0167	0	0	0.00623	0.0344	0.0204	0	0	0	0.0231	0.022	0	0	0.0149	0	0
ACTN1	121	77.8	121	119	280	106	45.1	53.6	55.7	64.2	38.6	68.4	64	87.4	75.7	50.9	100	252	35.6	68.1	126	121	40	64.9	64.6	156	173	34.5	67.2	43	56.7	42.9	89.8	132	112	40.6	34.6	91.2	112	205	201	44.4	82.8	39.7	87.9	60.8	68.9	57.5	32.8
ACTN2	0.00575	0.00651	0.00744	0	0	0.00425	0.0146	0	0.00817	0.00674	0.00246	0.0028	0.00477	0.0039	0.00315	0	0	0.012	0.00429	0.00407	0	0.00248	0.0122	0.00247	0	0	0	0.00606	0.00924	0	0.00331	0.0043	0.0052	0	0.0151	0.00321	0.00782	0.0135	0.00961	0.00725	0.00372	0	0.00725	0.0046	0.0149	0.0101	0.00938	0.0105	0.00555
ACTN3	0.0469	0.0354	0.0202	0.0171	0.0531	0.0289	0.0298	0.129	0.0222	0.0137	0.0468	0.0457	0.123	0.0212	0.0386	0.0649	0.0393	0.0163	0.274	0.113	0.129	0.0303	0.0249	0.218	0.0203	0.0257	0.0187	0.022	0.0283	0.136	0.0765	0.0585	0.0212	0.0501	0.0103	0.0611	0.0293	0.0441	0.0915	0.0394	0.0152	0.0512	0.0427	0.0501	0.0445	0.101	0.016	0.0381	0.155
ACTN4	53.2	33.3	52.9	58.4	104	44	26.4	28.9	33.6	32.6	27.8	35.5	41.7	42.7	34.7	31.3	40.1	76.7	40.4	43.4	61.7	68.7	25.7	39.4	30	52.4	67.2	17	34.9	38.8	35.3	28.5	48.8	49.8	39.9	18.2	18.7	40.7	45.8	67.1	69.5	33.4	42.5	22.1	45.8	35.7	41.8	23.1	26.8
ACTR10	13	17.1	9.05	14	15.8	15.8	12.4	14.5	11.7	12.5	11.4	13.7	9.41	13.8	12.1	11.1	16.7	16.5	10.7	11.1	12.9	14.2	11.8	15.2	12.3	18.1	20.1	11.7	12.7	8.7	11.8	13.1	16.2	17.6	11.3	12.2	11.6	11.3	12.6	17.2	10.7	11.9	9.32	12.6	12.1	10.7	11.1	11.1	11.8
ACTR1A	39.1	34.7	41.8	35.7	70.2	38	31.1	29.6	24.3	29.7	25.8	33.9	43	45.1	31.5	29.2	42.8	67.6	33.9	37.1	59.3	41.2	24.7	33.7	27.7	42.1	51.8	25.9	27.6	28.8	33.1	31.3	44.6	47.8	28.5	24.3	23	42.6	38.1	41.5	37.2	26.8	39.8	28	30.3	35.3	31.6	27.5	30.1
ACTR1B	20	19.4	20.8	23.2	19.1	19.5	20.6	22.1	24	18.4	25.3	25.4	25.2	23.4	23.1	26.7	21.5	20.3	33.2	25.7	22.2	19.2	25	21	23	17.7	17.8	19.2	22.4	23.5	19.6	22.6	18.2	19.1	15.2	22.5	20.9	24.1	24	14.1	15.3	19	22.8	21.2	17.8	18.4	19.9	25.1	22.4
ACTR2	41.5	46.6	60.6	62.6	90.1	63.4	45.1	52.9	43.4	55.1	35	48.7	39.7	40.9	46	39.1	63.2	77	30.5	44.1	28.5	81.2	39	58.4	46.9	82.7	110	48.3	53.4	45	51.5	37.7	32.9	58.8	57.2	35.7	37.9	36.3	38.3	100	66.5	45.4	42	38.6	59.1	46.6	53.4	33.3	32.7
ACTR3	102	124	108	124	183	132	102	121	88.8	99.4	75.9	108	94.7	99.6	104	84.9	129	169	73.1	92.3	86.2	147	83	122	106	155	193	93.2	105	84.9	115	98.2	96	141	113	95	78	103	106	197	143	96.2	94.4	87.8	120	98.1	108	86.6	81.3
ACTR3B	0.948	0.831	0.92	0.887	1.28	0.787	0.722	0.832	0.791	0.826	1.04	0.939	0.933	1.1	0.941	0.976	0.938	0.825	1.27	0.976	1.14	0.785	1.05	0.687	0.882	0.751	1.35	0.965	0.865	0.901	0.927	0.718	1.02	0.866	0.994	0.852	0.93	1.03	1.1	0.791	0.767	0.683	0.861	0.744	0.753	0.644	0.623	0.989	0.829
ACTR3BP2	0	0	0	0	0	0	0	0	0	0	0	0	0	0	0	0	0	0	0	0	0	0	0	0	0	0	0	0	0	0	0	0	0	0	0	0	0	0	0	0	0	0	0	0	0	0	0	0	0
ACTR3BP5	0	0	0	0	0	0	0	0	0	0	0	0	0	0	0	0	0	0	0	0	0	0	0	0	0	0	0	0	0	0	0	0	0	0	0	0	0	0	0	0	0	0	0	0	0	0	0	0	0
ACTR3C	0.312	0.415	0.324	0.894	0.658	0.582	0.31	0.441	0.347	0.408	0.407	0.17	0.274	0.51	0.291	0.285	0.208	0.42	0.397	0.441	0.275	0.434	0.416	0.465	0.456	0.362	0.38	0.264	0.287	0.616	0.264	0.412	0.166	0.62	0.277	0.348	0.424	0.224	0.307	0.439	0.463	0.217	0.216	0.205	0.294	0.236	0.202	0.469	0.283
ACTR5	3.39	2.52	3.47	3.84	3.13	3.4	4.61	4.45	4.19	4.64	4.69	3.63	4.75	4.06	3.65	5.04	3.85	3.34	6.47	5.79	4.18	3.68	5.48	4.38	4.07	3.91	2.54	4.42	4.72	4.84	5.45	3.85	4.82	2.55	3.27	4.15	5.43	4.45	4.25	3.21	2.66	3.66	3.96	4.39	3.91	3.82	4.43	4.33	4.72
ACTR6	2.75	5.65	1.4	3.22	1.55	3.8	4.31	2.78	4.88	5.11	4.11	3.38	1.22	2.64	1.77	2.49	1.75	2.27	4.66	1.92	1.02	2.6	5.17	6.23	5.28	3.29	2.6	7.33	5.02	3.91	3.49	5.42	5.42	2.46	4.5	5.34	7.39	1.62	1	1.9	2.25	5.58	1.91	7.95	4.91	4.64	2.52	1.79	6.77
ACTR8	2.91	2.71	4.02	3.08	3.57	3.27	3.75	3.26	3.13	3.51	3.49	3.27	3.12	3.26	3.13	3.13	3.78	3.09	3.3	3.58	3.54	3.73	3.79	3.22	3.44	3.24	3.31	4	3.63	3.85	4.04	3.28	3.51	2.9	3.21	3.53	3.83	3.11	3.1	3.84	3.32	3.81	3.82	3.3	3.61	2.76	4.24	3.07	3.94
ACTRT1	0	0	0	0	0	0	0	0	0	0	0	0	0	0	0	0	0	0	0	0	0	0	0	0	0	0	0	0	0	0	0	0	0	0	0	0	0	0	0	0	0	0	0	0	0	0	0	0	0
ACTRT2	0	0	0	0	0	0	0	0	0	0	0	0	0	0	0	0	0	0	0	0	0	0	0	0	0	0	0	0	0	0	0	0	0	0	0	0	0	0	0	0	0	0	0	0	0	0	0	0	0
ACVR1	2.88	1.86	3.51	2.12	4.56	1.96	2.74	1.84	2.25	3.21	2.6	2.92	2.43	2.94	3.12	2.51	3.54	2.72	1.47	3.39	2.6	2.58	2.97	1.98	2.84	2.11	2.08	4.1	3.14	2.27	3.58	2.34	2.52	1.76	2.41	3.16	3.15	2.83	2.78	2.82	3.53	3.74	3.52	2.39	2.89	2.68	2.99	3.17	2.27
ACVR1B	4.13	6.25	5.06	9.14	8.78	7.7	3.59	6.22	5.82	5.28	3.46	4.46	4.32	4.4	3.56	4.01	5.06	8.98	4.22	4.17	5.58	9.02	3.09	7.31	3.95	8.84	10.1	3.46	4.56	3.58	3.6	3.27	3.33	7.78	5.76	3.48	3.97	5.57	3.64	9.77	6.71	3.95	5	3.9	5.38	5.44	5.83	3.61	2.85
ACVR1C	0.0832	0.0357	0.113	0.144	0.0445	0.301	0.324	0.185	0.338	0.296	0.226	0.184	0.0547	0.121	0.156	0.19	0.0974	0.0567	0.135	0.117	0.0451	0.151	0.374	0.144	0.465	0.0897	0.146	0.186	0.176	0.158	0.134	0.118	0.0441	0.0551	0.162	0.234	0.312	0.097	0.0831	0.145	0.15	0.373	0.0591	0.304	0.277	0.0856	0.0925	0.201	0.104
ACVR2A	0.844	0.708	1.16	0.929	0.858	0.968	1.38	1.3	1.36	1.39	1.21	1.26	1.4	1.42	1.38	1.2	1.25	0.666	1.72	1.56	0.71	1.11	1.55	1.28	1.3	0.936	1.15	1.46	1.69	1.35	1.24	1	0.741	0.386	0.931	1.27	1.08	1.35	1.06	1.09	0.704	1.2	1.09	1.23	1.05	0.587	1.15	1.52	0.772
ACVR2B	0.22	0.186	0.282	0.337	0.147	0.409	0.344	0.397	0.563	0.519	0.381	0.526	0.186	0.312	0.282	0.378	0.321	0.141	0.333	0.357	0.242	0.159	0.56	0.347	0.468	0.268	0.208	0.542	0.613	0.48	0.377	0.216	0.211	0.138	0.317	0.363	0.482	0.209	0.362	0.214	0.225	0.328	0.171	0.33	0.361	0.229	0.295	0.643	0.231
ACVRL1	0.231	1.12	0.434	0.172	0.339	0.362	0.285	0.243	0.224	0.995	0.275	0.236	0.324	0.674	0.369	0.304	0.242	0.424	0.216	0.462	0.399	0.402	0.224	0.267	0.274	0.287	0.302	0.448	0.415	0.234	0.436	0.743	0.802	0.173	0.275	0.287	0.537	0.364	0.277	0.529	0.456	0.645	0.259	0.755	0.458	0.578	0.289	0.357	0.573
ACY1	2.03	1.9	2.73	1.8	1.88	1.39	2.38	2.07	1.82	2.27	2.59	2.21	3.56	4.02	2.81	3.16	2.86	2.32	2.87	3.88	5.15	1.91	2.1	2.07	1.86	1.79	1.5	2.5	2.7	2.57	2.29	2.55	3.69	2.27	1.79	2.38	2.47	2.97	2.78	1.87	1.68	2.2	3.15	2.56	1.62	2.82	2.28	2.88	3.13
ACY3	0.461	0.363	0.588	0.146	0.136	0.34	0.22	0.19	0.218	0.517	0.411	0.448	0.565	0.897	0.373	0.27	0.416	0.271	0.553	0.354	0.72	0.371	0.192	0.284	0.26	0.264	0.128	0.26	0.225	0.312	0.807	1.11	0.778	0.421	0.578	0.481	0.375	0.593	0.368	0.253	0.48	0.525	0.876	0.377	0.331	0.422	0.686	0.586	1.14
ACYP1	3.17	2.95	2.15	2.2	1.54	2.31	4.81	3.49	3.61	3.14	3.9	3.8	2.57	3.18	2.75	3.72	2.87	1.53	4.17	3.69	3.05	2.34	3.5	3.71	3.09	2.36	1.9	3.15	3.3	3.37	3.47	4.21	4.02	2.42	2.23	3.6	3.89	2.82	3.87	1.48	1.98	3.81	2.6	4.35	2.87	2.45	2.99	3.13	4.83
ACYP2	1.13	1.73	1.58	1.38	1.98	1.92	1.91	2.18	1.89	2.37	2.52	1.88	2.49	2.28	2.68	1.71	2.07	1.77	1.6	1.42	2.06	1.6	2.72	1.97	1.69	1.65	1.93	2.36	2.02	2.17	2.06	2.64	2.21	2.24	1.21	1.79	2.53	2.39	2.09	1.27	1.74	2.38	1.91	2.24	1.48	1.53	1.64	2.19	2.03
ADA	14.9	12.3	13.4	9.51	13.8	7.78	19.6	11.7	9.81	9.23	16.6	12.7	21.7	17.2	11.1	11.8	12	5.69	23.7	14.5	17.2	8.53	12.1	13.6	9.18	6.2	6.29	15.9	11.8	20.3	19.6	20.3	23.9	16.1	6.68	13.7	14.3	14.5	12.4	9.24	9.4	13	26.7	18.9	12.1	26.8	20.6	12.7	24
ADAD1	0	0	0.00996	0.0252	0	0.0171	0.00977	0	0.0164	0.00677	0.00493	0.0169	0	0	0	0	0	0	0	0.00409	0	0.00497	0.0123	0.00496	0.00856	0.00951	0.0184	0.00811	0.00464	0.0138	0	0	0	0	0.00757	0	0	0.0108	0.0322	0.0218	0	0.0144	0	0.00462	0.00597	0	0.0141	0	0.0111
ADAD2	0.0226	0	0.039	0.0576	0	0.0417	0	0.0143	0.0589	0	0.0193	0.022	0.0375	0.00767	0.0124	0.0762	0.0142	0	0	0.012	0.0169	0.0487	0.044	0.00971	0.0796	0.0093	0.00902	0.0675	0.0136	0.00677	0.0065	0	0	0.031	0.00741	0.0378	0.0154	0.00531	0	0.00712	0.0146	0.0282	0.0143	0.0136	0.0175	0	0.00922	0.0276	0.00545
ADAL	0.473	0.483	0.433	0.521	0.306	0.562	0.803	0.631	0.684	0.635	0.813	0.575	0.599	0.641	0.601	0.766	0.504	0.28	0.597	0.688	0.3	0.475	0.791	0.699	0.589	0.346	0.414	1.01	0.738	0.555	0.521	0.648	0.516	0.504	0.697	0.821	0.817	0.537	0.465	0.439	0.501	0.856	0.511	0.822	0.404	0.488	0.536	0.796	0.71
ADAM1	1.05	2	1.36	1.47	0.658	2.66	2.02	2.38	2.52	2.15	2.15	1.48	1.37	0.784	1.53	1.84	1.24	0.811	1.76	1.68	0.343	1.37	2.54	1.67	2.22	1.19	1.41	2.21	1.59	2.13	1.28	1.14	0.406	0.822	2.53	2.02	2.53	1.24	1.28	1.35	1.35	2.35	1.43	2.02	1.99	1.53	1.54	1.34	1.49
ADAM10	18.8	17.6	19.6	24.4	22.2	30.4	18.3	19.3	21.8	27.5	13.9	16.1	12	11.7	16.8	13	19.5	20	13	13.4	9.62	27.7	16.6	26.5	19.7	33.2	36	19.6	21	22.9	18.4	16.8	14.2	15.1	27.7	18	15.9	14.2	14.8	41.2	31.8	22.4	16.7	21.3	30.5	25.7	23.1	15.4	13.6
ADAM11	0.107	0.127	0.0791	0.056	0.023	0.0655	0.0676	0.105	0.0812	0.0589	0.159	0.0835	0.0785	0.157	0.0778	0.15	0.0856	0.08	0.137	0.113	0.0665	0.0459	0.117	0.0533	0.0987	0.0779	0.0802	0.0561	0.0855	0.117	0.0783	0.115	0.0962	0.108	0.109	0.125	0.0865	0.158	0.145	0.0932	0.199	0.0886	0.157	0.107	0.0887	0.0969	0.0772	0.115	0.0942
ADAM12	0.119	0.0422	0.135	0.0597	0.163	0.0193	0.0442	0.00708	0.118	0.194	0.0876	0.152	0.034	0.0278	0.151	0.0928	0.0797	0.0233	0.0334	0.0554	0.0307	0.0514	0.231	0.048	0.283	0.163	0.128	0.0694	0.0599	0.141	0.0429	0.167	0.00337	0.017	0.0562	0.0978	0.0571	0.0543	0.0561	0.0188	0.147	0.0221	0.0219	0.0298	0.0617	0.0196	0.114	0.0454	0.0738
ADAM15	15.2	19.6	18.8	8.67	13.9	10.9	10.4	10.3	10.1	22.8	10.9	15.3	16.6	24.9	13.6	12.5	11.9	25.8	20.1	19.8	22.1	14.9	13.9	11.6	11.6	11.4	10.8	12.2	12.6	16	15.4	16.6	20.3	9.28	15.6	11.5	16.6	19	16.6	14.2	15.4	17.8	18.8	17.2	9.77	23	17	17.1	14.1
ADAM17	9	6.56	7.65	22	13.1	23	7.39	7.67	14.3	8.64	5.02	7.55	5.8	4.99	8.12	5.88	7.91	8.14	6.06	6.12	6.91	11.2	8.17	10.7	8.44	26.9	15.7	7.2	7.66	7.33	7.25	8.12	4.17	10.6	15.9	6.33	7.76	5.29	6.27	20	13.2	9.54	8.39	7.07	11.6	11.7	14.8	6.16	6.94
ADAM18	0	0	0	0	0	0	0	0	0	0	0	0	0	0	0	0	0	0	0	0	0	0	0	0	0	0	0	0	0	0	0	0	0	0	0	0	0	0	0	0	0	0	0	0	0	0	0	0	0
ADAM19	19.3	17.4	21.3	39.7	52.8	28.8	14.8	29.8	38.6	13	15.7	16.5	14.7	13.9	19	21.3	17.6	24.8	8.46	15.1	25.3	36.5	14.8	30.5	14.3	25.8	51.2	14.7	9.24	13.8	13.8	10	9.86	42.6	35	14	8.65	25.4	14.8	36.6	32.1	19.6	15.6	11.3	23.6	13.9	16.4	7.34	11.7
ADAM2	0	0	0	0	0	0	0	0	0	0	0	0	0.00817	0	0	0	0	0	0	0	0	0	0	0	0	0	0	0	0	0	0	0	0	0	0	0	0	0	0	0	0	0	0	0	0	0	0	0	0
ADAM20	0.0187	0.0106	0.0241	0.0407	0.0181	0.0275	0.0316	0	0.0707	0.0164	0.0398	0.0363	0.00773	0.0253	0.0409	0.029	0.0176	0.0291	0.0209	0.0594	0.021	0.0281	0.0297	0.028	0.038	0.0154	0.0446	0.036	0.03	0.028	0.0161	0.0488	0.0421	0.0682	0.0428	0.0208	0.0222	0.0351	0.0312	0.047	0.0181	0.0262	0.0353	0.0448	0.00482	0.0109	0.0419	0.0398	0.0225
ADAM21	0	0	0.00844	0.0213	0	0	0.00827	0.00619	0.0278	0	0.0125	0	0.0081	0	0.0107	0.0203	0	0	0.00729	0.00346	0.00732	0.00421	0.0139	0.0084	0.0217	0	0.0156	0.00686	0.0157	0.0117	0.00562	0	0	0	0.0128	0.00545	0.0166	0.00459	0	0.00616	0.0127	0.0213	0.00822	0	0.00505	0	0	0	0.00943
ADAM21P1	0	0	0	0	0	0	0	0	0	0	0	0	0	0	0	0	0	0	0	0	0	0	0	0	0	0	0	0	0	0	0	0.00951	0	0	0	0	0	0	0	0	0	0	0	0	0	0	0	0	0
ADAM22	0.2	0.208	0.258	0.361	0.183	0.404	0.45	0.385	0.516	0.305	0.459	0.306	0.354	0.182	0.356	0.386	0.226	0.219	0.437	0.287	0.0923	0.288	0.582	0.553	0.424	0.216	0.236	0.531	0.401	0.41	0.284	0.285	0.0891	0.153	0.278	0.393	0.419	0.215	0.215	0.287	0.177	0.329	0.222	0.297	0.43	0.266	0.259	0.262	0.321
ADAM23	0.0938	0.174	0.224	0.329	0.289	0.164	0.303	0.0701	0.222	0.235	0.277	0.307	0.127	0.601	0.289	0.504	0.45	0.124	0.21	0.226	0.0957	0.0734	0.685	0.0695	0.635	0.175	0.143	0.443	0.325	0.332	0.26	0.108	0.0847	0.0779	0.0782	0.223	0.191	0.312	0.285	0.188	0.27	0.141	0.362	0.0887	0.269	0.00997	0.421	0.208	0.127
ADAM28	2.62	6.77	2.91	7.23	1.9	3.46	3.63	5.15	4.77	1.69	2.93	4	2.88	0.961	3.4	4.25	1.98	2	2.8	3.32	1.77	4.89	4.14	4.3	3.79	6.42	5.2	5.32	2.62	2.39	3.04	2.61	2.07	4.49	9.79	5.43	2.91	2.26	2.62	2.45	1.87	4.07	3.28	4.42	3.69	1.83	4.98	1.53	2.9
ADAM29	0.00783	0.0177	0	0	0	0.00578	0.0166	0	0.00742	0.00459	0.00335	0	0	0	0.00429	0.00406	0	0.0163	0	0	0.0176	0.00674	0.00555	0	0.0029	0	0	0.0055	0.00629	0.00939	0.00901	0	0.0142	0	0	0	0.00533	0.00368	0	0	0.00507	0.0122	0.0198	0.00627	0.00405	0	0.016	0	0.00756
ADAM30	0	0	0	0	0	0	0	0	0	0	0	0	0	0	0	0	0	0	0	0	0	0	0	0	0	0	0	0	0	0	0	0	0	0	0	0	0	0	0	0	0	0	0	0	0	0	0	0	0
ADAM32	0.00955	0.0216	0.00412	0	0.00927	0	0.0121	0.0242	0.00452	0	0.00816	0	0.0238	0.00648	0.00523	0.0099	0	0.00993	0	0	0	0	0.0203	0.0123	0.00354	0.00786	0.0152	0.00335	0	0.00572	0.00549	0	0.00863	0	0.00626	0.00533	0.00974	0.00897	0.00532	0.00602	0.0124	0.0119	0.0201	0.00382	0.0148	0.0112	0	0.00582	0.00461
ADAM33	0.0592	0.0335	0.0128	0	0	0.00546	0	0.00936	0	0.026	0.0158	0.036	0	0.0502	0.0203	0.0307	0.0233	0	0.00552	0.0183	0.0554	0.0191	0.0262	0.00318	0.0357	0	0	0.0312	0.0208	0.00887	0.00852	0.0111	0.00669	0	0.0243	0.00826	0.0101	0.0139	0.0165	0.0187	0.024	0.00923	0.0249	0.0267	0.0306	0.013	0.00302	0.0271	0.0143
ADAM3A	0	0	0	0	0	0	0	0	0	0	0	0	0	0.00671	0	0	0	0	0	0	0.00741	0	0	0	0	0	0	0	0	0	0	0	0	0	0	0	0	0	0	0.00623	0	0	0.00416	0	0	0	0	0	0
ADAM5P	0	0	0	0	0	0	0	0	0	0	0	0	0	0	0	0	0	0	0	0	0	0	0	0	0	0	0	0	0	0	0	0	0	0	0	0	0	0	0	0	0	0	0	0	0	0	0	0	0
ADAM6	0	0	0	0	0	0	0	0	0	0	0	0	0	0	0	0	0	0	0	0	0	0	0	0	0	0	0	0	0	0	0	0	0	0	0	0	0	0	0	0	0	0	0	0	0	0	0	0	0
ADAM7	0	0	0	0.00729	0	0	0	0	0.00949	0	0	0	0	0	0	0	0	0	0	0	0.0075	0	0	0.0043	0	0	0	0	0	0	0	0	0	0	0	0	0	0	0	0	0	0	0.00421	0	0	0	0	0	0
ADAM8	284	402	173	331	351	357	130	153	148	169	112	178	151	176	154	166	179	426	174	154	240	201	149	212	222	304	303	50.7	102	126	99	148	237	211	211	124	91.4	220	236	225	292	130	152	107	247	161	145	151	104
ADAM9	3.86	5.82	2.85	5.52	4.37	5	2.61	3.59	3.54	5.64	2.03	2.79	2.46	2	2.8	1.89	3.59	5.27	2.12	2.36	1.41	4.39	2.69	5.35	2.84	5.03	5.63	3.28	3.3	2.66	3.53	3.14	2.64	2.97	5.63	2.17	4.05	2.12	2.15	7.18	5.77	4.6	3.46	3.53	4.96	5.01	5.52	3.1	2.43
ADAMDEC1	0.107	0.23	0.115	0.218	0.176	0.0867	0.122	0.264	0.0556	0.138	0.105	0.26	0.31	0.123	0.0644	0.122	0.329	0.0556	0.159	0.249	0.424	0.29	0.087	0.133	0.119	0.325	0.145	0.165	0.24	0.134	0.178	0.112	0.319	0.117	0.182	0.232	0.222	0.181	0.274	0.283	0.111	0.19	0.391	0.239	0.193	0.356	0.266	0.234	0.201
ADAMTS1	0.134	0.874	0.536	0.904	0.228	0.161	0.787	0.482	0.355	0.272	0.651	0.45	0.325	0.52	0.23	0.29	0.345	0.157	0.317	0.2	0.185	0.583	0.559	0.291	0.272	0.516	0.929	0.529	0.618	0.423	0.345	0.473	0.0607	0.215	0.319	0.228	0.453	0.11	0.331	0.992	0.127	0.101	0.379	0.592	0.605	0.436	0.69	0.14	0.462
ADAMTS10	2.51	2.34	1.57	3.17	1.87	2.13	2.87	3.83	3.57	2.9	5.22	3.83	4.76	4.02	4.33	2.88	3.27	1.3	12.7	3.01	2.16	2.96	2.78	2.41	6.16	2.73	1.58	3.76	4.26	4.74	2.14	4.03	1.52	1.15	1.3	4.07	2.9	2.87	3.86	1.91	1.5	1.84	2.58	3.19	3.97	1.34	1.26	6.38	1.36
ADAMTS12	0.00526	0	0	0	0	0	0	0	0	0	0	0	0	0	0	0	0	0	0	0.00186	0.00394	0	0	0	0	0.00433	0	0.00185	0	0	0	0	0	0	0	0.00293	0	0.00494	0.00293	0	0	0	0.00442	0.0021	0	0	0	0	0.00254
ADAMTS13	0.174	0.208	0.294	0.177	0.125	0.22	0.318	0.362	0.24	0.236	0.514	0.247	0.28	0.31	0.327	0.35	0.222	0.217	0.471	0.399	0.168	0.141	0.493	0.237	0.306	0.303	0.111	0.29	0.158	0.301	0.209	0.171	0.216	0.245	0.222	0.377	0.304	0.247	0.379	0.0971	0.228	0.149	0.27	0.193	0.249	0.299	0.255	0.466	0.252
ADAMTS14	0.0247	0.117	0.0426	0.0899	0.0671	0.0693	0.092	0.106	0.0702	0.0463	0.11	0.0433	0.135	0.0537	0.00542	0.0282	0.0311	0.0257	0.0922	0.0402	0.0259	0.0617	0.0718	0.0424	0.0348	0.0244	0.102	0.0208	0.0536	0.0889	0.0455	0.388	0.134	0.384	0.13	0.105	0.171	0.0441	0.0661	0.168	0.0608	0.0709	0.0873	0.214	0.0945	0.197	0.214	0.0422	0.153
ADAMTS15	0	0	0.00198	0	0	0	0.00582	0	0.00217	0	0	0.00447	0	0.00311	0	0.00476	0.00289	0	0.00342	0	0	0.00198	0	0	0.0051	0	0.00366	0.00322	0	0	0	0	0	0.0042	0.00301	0	0	0	0	0	0	0.00143	0	0.00367	0	0	0	0	0
ADAMTS16	0.00524	0.00592	0.00452	0.0152	0.00508	0	0.00443	0.00331	0.0322	0.00614	0.0224	0.0051	0.00868	0	0.0115	0.0136	0.0198	0	0.0234	0.00741	0.00784	0.00451	0.0315	0.018	0.0194	0.00862	0.00835	0.0165	0.0126	0.0126	0.0151	0.0118	0	0	0.0103	0.0292	0.0214	0.00492	0.00292	0	0	0.0114	0.0154	0.0105	0.0135	0	0.00427	0.0191	0.0152
ADAMTS17	0.0987	0.0977	0.204	0.201	0.0479	0.331	0.265	0.349	0.337	0.248	0.276	0.23	0.181	0.273	0.325	0.377	0.272	0.0898	0.178	0.326	0.102	0.239	0.462	0.148	0.427	0.108	0.141	0.355	0.325	0.185	0.135	0.12	0.0483	0.0865	0.189	0.218	0.187	0.261	0.147	0.158	0.304	0.114	0.156	0.137	0.0872	0.0337	0.215	0.293	0.119
ADAMTS18	0	0	0	0	0.00427	0	0.00373	0	0.00834	0	0	0.00643	0	0	0	0.00228	0	0	0	0	0.0099	0	0.00156	0	0.0049	0.00725	0	0	0	0	0	0	0	0.00403	0	0	0	0	0.00491	0	0	0.00137	0	0	0	0	0	0	0
ADAMTS19	0	0	0	0	0.00497	0	0	0	0	0	0	0	0	0	0	0	0	0	0	0.00362	0	0	0	0	0	0	0.00408	0	0	0	0	0	0	0	0	0	0	0	0	0	0	0	0.00215	0	0	0	0	0	0
ADAMTS2	0.0111	0.6	0.0191	6.91	2.69	6.07	0.0421	0.475	3.03	0.335	0.085	0.0161	0.0153	0.442	0.0605	0.0382	0.0116	3.19	0	0.16	0.237	0.217	0.00652	0.0949	0.0287	5.61	3.3	0	0.325	0.00662	0.0233	2.21	0.0965	2.46	4.63	0.0103	1	0.0121	0.244	2.96	1.34	0.296	0.00929	1.22	0.00571	7.1	0.921	0.229	1.04
ADAMTS20	0	0	0	0	0.00441	0	0	0	0	0	0	0	0	0.00308	0	0.00707	0	0	0	0	0.0034	0	0	0	0	0	0	0	0.00182	0	0	0	0	0	0	0	0	0	0.00506	0.00286	0	0	0.00191	0	0.00235	0.00266	0	0.00277	0.00219
ADAMTS3	0	0.00506	0	0	0	0.0231	0	0.00566	0	0.00262	0	0	0.00371	0	0.00245	0.00232	0.00281	0.0233	0.00334	0	0	0.00385	0	0	0	0	0	0	0.00718	0.00536	0	0.00335	0	0	0.00293	0.0025	0.00761	0	0	0.00282	0	0.00139	0	0.00179	0.00694	0.00523	0	0	0.00216
ADAMTS4	0.12	0.177	0.132	0.236	0.0992	0.142	0.084	0.186	0.131	0.0634	0.2	0.155	0.13	0.159	0.181	0.209	0.11	0.05	0.0583	0.249	0.117	0.22	0.19	0.0826	0.194	0.158	0.0863	0.203	0.203	0.123	0.187	0.175	0.114	0.0989	0.233	0.258	0.292	0.161	0.137	0.208	0.195	0.165	0.205	0.31	0.149	0.172	0.147	0.487	0.107
ADAMTS5	0.0512	0.00915	0.107	0.0471	0.212	0.213	0.0262	0.148	0.106	0.347	0.053	0.148	0.0648	0.0567	0.0605	0.191	0.0966	0.168	0.0684	0.0763	0.129	0.186	0.0926	0.0694	0.0769	0.0843	0.0989	0.141	0.195	0.0727	0.0171	0.0706	0.0146	0.0197	0.0124	0.0571	0.0284	0.076	0.0631	0.0476	0.0436	0.158	0.0476	0.0787	0.103	0.0378	0.0187	0.0542	0.0052
ADAMTS6	0.0573	0.0324	0.0788	0.0912	0.0174	0.135	0.123	0.0748	0.144	0.0483	0.104	0.0697	0.0743	0.017	0.145	0.134	0.0428	0.0186	0.102	0.133	0.0456	0.0555	0.113	0.105	0.104	0.147	0.0714	0.22	0.0878	0.131	0.122	0.121	0.0648	0.0688	0.291	0.154	0.177	0.0286	0.0479	0.0429	0.0719	0.095	0.0994	0.0989	0.157	0.0566	0.123	0.155	0.126
ADAMTS7	0.00949	0.0215	0.0164	0.0069	0.0322	0	0.01	0.021	0.00225	0.0167	0.00608	0.0115	0	0.0193	0.0208	0.00246	0.0328	0.0395	0.0142	0.0101	0.0178	0.0286	0.0101	0.0183	0.0158	0.00781	0.0114	0.0183	0.00381	0.0114	0.0136	0.0071	0.0343	0.013	0.00622	0.0132	0.0129	0.0223	0.0211	0.0179	0	0.00444	0.00798	0.0171	0.0221	0.0166	0.00194	0.00867	0.00916
ADAMTS8	0.0427	0.0161	0.0092	0.0466	0.0483	0.021	0.0692	0.018	0.0404	0.0167	0.0516	0.0208	0.0648	0.0482	0.0351	0.0405	0.0581	0.0148	0.111	0.0428	0.0426	0.0245	0.0327	0.0275	0.0316	0.0117	0.0397	0.0449	0.0114	0.0469	0.0573	0.0372	0.0193	0.0195	0.014	0.0317	0.029	0.0134	0.0317	0.0224	0.0322	0.0377	0.0299	0.0256	0.0184	0.0457	0.0232	0.052	0.0309
ADAMTS9	0	0	0	0	0	0	0	0.00451	0.00506	0.00835	0	0	0	0	0	0.00369	0	0.00741	0.00266	0	0	0.0046	0.00631	0	0.00132	0.00293	0	0	0.00429	0.00427	0.00205	0	0	0.00326	0.00234	0	0	0	0	0	0	0	0	0.00285	0	0	0	0.00651	0
ADAMTS9-AS1	0	0	0	0	0	0	0	0	0	0	0	0	0	0	0	0	0	0	0	0	0	0	0	0	0	0	0	0	0	0	0	0	0	0	0	0	0	0	0.00402	0.00454	0	0	0	0	0	0.00843	0	0	0
ADAMTS9-AS2	0	0	0	0	0	0	0	0	0	0	0	0	0	0	0	0	0	0	0	0	0	0	0	0	0	0	0	0	0	0	0	0	0	0	0	0	0	0	0	0	0	0	0	0	0	0	0	0	0
ADAMTSL1	0.00326	0	0.0014	0	0	0	0	0	0.00154	0	0	0	0	0.00221	0	0	0	0	0	0	0	0	0.00577	0.0014	0.00121	0	0	0.00114	0.00392	0	0	0	0	0	0	0	0.00332	0	0	0	0	0	0	0.0013	0	0	0	0	0
ADAMTSL2	0.0252	0	0.0217	0.00917	0.0306	0.014	0.0213	0.0199	0.0239	0.0111	0.0431	0.0399	0.0104	0.0128	0.0276	0.0555	0.0198	0.0262	0.0141	0.0223	0.0236	0.00271	0.0536	0.00541	0.021	0.0311	0.00503	0.0465	0.0177	0.0189	0.0145	0.00943	0.0171	0.0115	0.00413	0.0387	0.0107	0.0118	0.014	0	0.0122	0.0059	0.0159	0.0177	0.013	0.0147	0.00257	0.0576	0.0213
ADAMTSL3	0	0.00803	0	0	0	0	0.0015	0	0	0.00208	0	0	0	0	0.00195	0	0	0.00369	0	0.00377	0.00798	0.00459	0	0.00152	0	0.00292	0	0	0.00285	0.00851	0.00204	0	0	0.00325	0	0	0.00121	0	0.00198	0.00224	0.0023	0.00664	0.00298	0	0.00367	0.00208	0.00434	0	0
ADAMTSL4	28.9	17.4	19.4	14.2	22.7	28.1	14.4	7.06	13.3	14.4	9.9	14	16.5	16	11.8	8.46	14.6	41.5	14.8	11.3	23.5	9.75	12	15.6	18	31.6	22.9	6.16	12.5	15.7	11	15.2	18.6	18.3	39	12.9	10.9	13.2	17.3	22.1	27.4	19.7	22.7	14.2	23.9	28	21.2	17.6	14.7
ADAMTSL5	0.447	0.32	0.602	0.796	0.628	0.572	0.798	0.536	0.712	0.417	0.802	1.15	1.38	1.09	1.04	1.3	0.539	0.341	1.55	0.735	0.621	0.471	1.02	0.904	1.07	0.308	0.334	0.618	0.553	0.667	0.855	0.682	0.577	0.542	0.49	0.88	0.471	1.08	0.975	0.454	0.555	0.509	0.809	0.565	0.711	0.65	0.439	1.21	0.699
ADAP1	36.2	49.7	31.5	38.6	60.7	41.1	25	32.4	32.3	32.6	29.3	37.2	47.8	59.4	29.9	26.9	37.2	76.4	45	31.7	59.5	31	24.4	28.4	28.2	45.9	26.3	15.8	22.7	24.1	23.1	43.3	43.6	54.6	28.8	25.6	29.2	39.6	31.8	34.1	42.3	22.6	36.3	30.1	32.8	45.8	27.6	37	26
ADAP2	6.62	6.32	6.95	3.2	4.44	4.38	5.79	3.47	3.19	7.04	3.89	5.84	8.21	8.85	5.27	3.73	6.61	7.09	6.52	6.37	9.18	5.71	4.62	4.73	3.5	4.69	3.46	5.46	5.66	6.04	7.43	5.78	9.76	2.88	4.56	5.31	6.07	6.22	3.93	6.83	5.39	7.73	11	8.48	6.29	11.7	7.85	6.04	6.87
ADAR	193	216	136	133	241	125	96.4	84.2	74.9	78.7	62.1	71.3	88.8	81.5	83	63.7	110	147	76.8	82.7	117	129	67.9	92.1	92.6	122	195	62.1	115	123	154	147	187	248	304	127	89.5	146	169	410	410	156	167	113	220	186	139	121	115
ADARB1	3.16	2.04	3.42	2.55	1.97	2.41	3.71	3.09	3.72	2.03	4.75	3.68	3.32	3.1	3.91	4.32	2.98	1.92	3.71	4.6	2.49	2.9	4.27	2.95	4.51	2.29	1.67	3.94	3.48	3.99	4.14	2.12	1.19	2.11	3.59	3.5	2.33	4.42	3	1.89	2.3	2.48	3.73	2.82	3.68	2.19	3.39	2.72	2.2
ADARB2	0.0896	0	0.004	0.00225	0.006	0.748	0.00523	0.446	0.00439	0.00181	0.00264	0.00301	0.113	0	0.00339	0.0016	0.00194	0	0.0807	0.14	0.199	0.00266	0.181	0.0252	0.00573	0	0.0592	0.152	0.00248	0.276	0	0.00231	0.00838	0.017	0.00203	0.397	0.217	0.286	0.00172	0.277	0.31	0.406	0.0013	0	0.0016	0.00181	0.00126	0.477	0.0567
ADARB2-AS1	0	0	0	0	0	0	0	0	0	0	0	0	0	0	0	0	0	0	0	0	0	0	0	0	0	0	0	0.0142	0	0	0	0	0	0	0	0	0	0	0	0	0	0	0	0.0971	0	0	0	0	0
ADAT1	3.19	2.4	4.29	5.99	3.66	6.5	3.76	3.75	4.96	3.73	3.45	4.1	2.88	2.38	4.47	3.51	3.01	2.21	2.7	3.29	1.79	4.4	6.75	4.35	3.84	4.9	5.1	4.56	2.9	4.74	2.89	3.22	1.08	3.93	4.79	3.36	3.45	2.23	2.03	5.35	3.07	3.55	3.37	3.08	4.46	3.04	4.91	3.04	2.33
ADAT2	1.14	1.24	1.21	1.28	0.578	1.47	1.56	1.67	1.58	1.15	1.85	1.45	1.21	0.89	1.52	1.71	1.06	0.563	1.3	1.47	0.652	1.06	1.57	1.25	1.74	1.04	0.917	1.92	1.6	1.57	1.38	1.44	0.896	1.09	1.82	1.96	1.86	0.98	1.21	1.02	0.82	1.7	1.23	1.71	1.16	1.11	1.51	1.61	1.65
ADAT3	1.9	1.42	1.67	2.4	1.54	1.46	1.6	1.25	1.12	1.29	1.45	2.08	1.97	2.74	2.06	2.54	1.01	0.754	7.12	1.71	1.43	1.21	1.8	1.88	1.66	1.19	0.71	0.712	1.18	2.49	1.65	1.87	1.55	2.08	1.06	1.66	1.87	1.14	1.84	1.01	1.26	1.49	2.17	1.07	1.43	2.11	1.49	2.26	2.89
ADC	0.716	0.459	0.731	0.599	0.822	0.617	0.601	0.816	0.995	0.804	1.19	0.918	0.821	1.56	1.12	1.53	0.78	0.509	1.15	1.27	0.778	0.596	1.23	0.374	1.24	0.57	0.581	0.968	1.21	0.708	0.68	0.884	0.485	0.382	0.438	0.839	0.459	0.97	0.911	0.564	0.587	0.488	0.642	0.654	0.759	0.412	0.38	1.44	0.449
ADCK1	2.23	4.52	2.89	1.74	2.18	1.4	1.99	1.81	2.14	2.23	3	2.48	3.21	3.6	2.4	4.5	2.42	2.19	4.34	2.75	8.22	2.25	2.23	1.67	3.7	1.8	5.98	2.29	2.47	2.56	2.66	2.17	3.39	1.95	1.62	2.35	2.97	3.48	2.56	3.89	1.75	2.54	3.06	4.79	1.69	2.56	2.73	2.03	2.48
ADCK2	5.5	4.27	6.73	4.95	4.01	3.72	5.33	5.1	4.48	5.53	6.68	7.3	7.77	8.8	6.14	6.57	6.3	4.07	6.96	7.6	10.4	5.22	5.66	4.49	5.07	4.72	3.58	5.52	5.48	6.99	5.81	5.9	8.04	4.41	3.59	5.81	6.02	6.69	5.75	3.69	4.05	5.08	7.29	5.94	4.29	7.14	6.09	7.06	6.1
ADCK3	12.5	8.22	16.5	27.5	30.8	16.6	8.11	12.7	17	15.6	13.3	14.3	19.5	22.5	13.6	12.2	13.8	15.3	11	18.6	20	18.3	16.6	14.1	13.1	13.1	29.6	10	15.2	12.6	13.4	7.28	19.3	14.2	9.66	8.63	10.5	18.6	13	15.7	17.4	9.99	12.4	11.3	8.72	11.7	13.2	10.2	8.17
ADCK4	15.7	14.5	12.3	21	20.7	16.4	9.2	12.7	14.5	10	10.4	11.8	15	16.8	12.7	12.5	12.4	21.9	16.4	12.3	19.7	13.2	10.8	15.2	12.1	21.5	21.5	7.53	9.77	10.6	9.39	11.9	18.1	20.3	14.1	10.1	9.34	14.1	13.5	16.2	14.6	9.99	13.4	11	10.6	15.3	11.7	12.4	12.3
ADCK5	4.04	3.18	3.87	4.83	3.2	3.24	5.36	3.63	4.79	4.07	5.68	4.71	4.95	5.64	5.31	5.38	3.2	3.87	9.53	5.32	5.46	3.33	5.93	5	5.34	4.21	2.62	3.71	4.39	5.16	3.84	5.17	4.93	3.49	3.55	5.38	5.04	6.39	3.73	2.26	3.17	5.15	5.38	4.72	4.34	4.56	4.29	4.98	5.15
ADCY1	0.0188	0.00236	0.00809	0.00152	0.00809	0.0138	0.00705	0.0198	0.00296	0.00366	0.00356	0.00406	0.00345	0.00424	0.0103	0.0238	0.00262	0	0.00155	0.00737	0	0.00628	0.00517	0.00179	0.00386	0.00515	0.00332	0.00732	0.00502	0.00749	0.0132	0.00468	0.00753	0.00381	0.00137	0.00465	0.00425	0.00587	0.0058	0	0.00135	0.0136	0.014	0.0075	0.00431	0.00609	0.00935	0.00508	0.0191
ADCY10	0.106	0.0924	0.0435	0.0874	0.0513	0.301	0.128	0.0304	0.0774	0.0507	0.0287	0.0538	0.0279	0.0424	0.0632	0.0498	0.0272	0.11	0.0609	0.0408	0.0108	0.0807	0.034	0.0619	0.0338	0.13	0.13	0.027	0.0328	0.0461	0.0442	0.0575	0.0347	0.0527	0.101	0.0536	0.0278	0.0496	0.0803	0.0727	0.0653	0.0539	0.0666	0.0365	0.0621	0.0281	0.0607	0.0293	0.0394
ADCY2	0.00397	0	0.00686	0	0.00386	0	0.00505	0.00251	0.00188	0	0.0017	0.00387	0	0	0.00218	0	0	0	0	0	0.00298	0	0.00704	0.00512	0.00295	0	0	0	0.0016	0	0	0	0	0	0	0	0	0	0.00664	0.00251	0	0.00124	0.00334	0.00159	0	0.00232	0	0	0
ADCY3	3.14	2.22	3.42	3.54	3.1	2.47	3.57	2.7	3.04	2.64	3.75	2.65	2.89	3.71	2.74	3.76	2.98	1.94	2.8	4.63	2.63	2.53	3.16	2.62	3.82	3.1	1.9	3.9	3.27	3.92	4.18	3.32	2.74	3.79	3.64	2.93	3.07	3.25	3.03	4.59	2.81	2.98	3.87	3.12	2.53	3.23	4.82	2.94	3.57
ADCY4	5.31	9.86	2.79	5.18	7.49	5.63	2.74	4.61	4.3	3.22	2.02	1.94	2.57	2.42	2.82	2.49	2.43	5.29	3.07	2.06	2.99	3.93	2.15	4.61	3.19	4.26	8.41	1.67	1.97	2.37	1.73	2.86	5.61	7.62	7.43	4.02	1.73	4.1	5.27	4.73	9.2	4.85	3.55	3.12	4.46	4.7	2.5	3.79	3.93
ADCY5	0.0999	0.0753	0.101	0.154	0.0606	0.129	0.132	0.142	0.122	0.134	0.119	0.101	0.131	0.124	0.123	0.233	0.133	0.0866	0.137	0.177	0.134	0.0968	0.184	0.143	0.17	0.0788	0.0664	0.0994	0.1	0.0973	0.0814	0.115	0.0978	0.11	0.0901	0.123	0.12	0.123	0.111	0.0761	0.0943	0.0986	0.147	0.13	0.0581	0.0657	0.136	0.0862	0.139
ADCY6	0.0739	0.0396	0.0822	0.0198	0.0717	0.0373	0.0428	0.0221	0.0516	0.107	0.216	0.0851	0.0902	0.121	0.0192	0.0726	0.0831	0.117	0.0841	0.0592	0.105	0.105	0.0496	0.0367	0.0951	0.0544	0.0124	0.056	0.0859	0.107	0.0425	0.0407	0.0316	0.0391	0.0561	0.0325	0.0423	0.0566	0.0715	0.0686	0.073	0.0691	0.085	0.0716	0.0523	0.0364	0.0349	0.0521	0.0544
ADCY7	33.5	47.5	40.2	43.3	29.4	38.9	41.5	32.7	35.4	37.2	31.2	32	27.4	19	32.8	31.1	29.2	24.5	42.4	30.9	13.8	39.9	32.5	36.8	39.9	25.8	43.6	29.7	38.9	48.4	31.8	35	18.1	35	51	42.9	41.7	26.8	26.6	56.3	58.4	43.5	36.6	35.9	53.3	44.4	40.7	32.6	29.2
ADCY8	0	0	0	0	0.0123	0	0	0	0.00601	0	0	0.00309	0	0	0.00696	0.00658	0	0.00661	0	0	0.0476	0	0.00225	0	0	0	0	0	0	0	0	0	0	0	0	0.00354	0	0	0.00708	0	0	0	0.00534	0	0	0	0	0	0
ADCY9	1.4	1.03	1.56	0.929	1.54	0.801	1.87	0.866	1.07	1.71	1.16	1.59	1.3	1.47	1.31	1.22	1.2	0.764	3.91	1.54	1.39	1.24	1.16	1.48	1.07	0.807	0.702	1.29	1.52	1.93	1.2	0.956	0.81	0.524	0.599	1.39	1.52	0.989	1.16	0.897	1.32	1.06	1.74	1.14	1.89	2.01	1.28	0.918	1.73
ADCYAP1	0.00795	0	0	0	0	0	0	0	0.00376	0	0	0	0.0132	0	0	0	0	0	0	0	0.00595	0	0	0	0	0	0	0	0	0	0	0.00595	0	0	0.0104	0	0	0	0.00886	0.00501	0	0.00248	0	0	0	0	0	0	0
ADCYAP1R1	0	0	0	0	0.0154	0.00292	0.00335	0.00251	0	0	0	0.00193	0	0.0107	0	0	0	0.00412	0	0.0014	0.0089	0	0	0	0.00587	0.00326	0	0	0	0	0	0	0.00358	0	0.0026	0	0.00269	0	0.00441	0.0025	0.00256	0	0	0	0	0	0	0	0
ADD1	59.2	45.4	58.1	55.2	103	47.3	37.5	37.9	35	40.1	37.1	42.3	56	54.9	42.3	38.8	54.4	81.8	41.5	54.8	70.3	58.9	36.9	39.2	40.5	61.3	63.6	37.3	45.1	44.3	46.3	32.2	48	58	47.9	30.8	28.6	46.6	49.5	59.5	61.4	37.6	53.9	31.7	46.8	42	50.7	33.3	36.9
ADD2	0.6	2.03	0.8	0.51	0.2	0.518	0.753	0.219	0.448	0.28	0.539	0.497	0.861	0.66	0.792	0.725	0.344	0.424	0.608	0.639	0.489	0.321	0.546	0.164	0.648	0.642	0.287	0.86	0.299	0.449	0.87	0.259	0.36	0.673	1.16	0.658	0.501	0.268	0.322	0.279	0.323	0.43	0.586	0.381	0.537	0.354	1.1	0.379	0.512
ADD3	23.6	35.4	29.5	37.2	38.4	38.3	38.5	49	34.4	37.9	32.7	37.8	23.6	21.5	36.5	34.1	34.2	20.2	26.6	31.2	11.3	45.7	39.9	37	39	33.2	54.7	55.2	39.9	39	43.7	33.7	17.6	31.8	44.8	45.3	42.7	22.9	29.7	62.6	39	48.2	28.6	39.3	38.8	31.7	32.8	37.2	28.2
ADGB	0.581	0.0167	0.00425	0.00716	0.00955	0.0581	0.00208	0.0156	0.0117	0.0115	0.0021	0.00479	0	0.01	0.0027	0.00766	0.00619	0.0256	0.00735	0.00348	0	0.0106	0.00698	0.00634	0.0128	0.0284	0.0668	0	0.00791	0	0.00567	0	0	0.009	0.0194	0.00275	0.01	0	0.00549	0.0124	0.00319	0.00614	0	0.00197	0.00509	0.00288	0.012	0.009	0.00238
ADH1A	0	0	0	0	0	0.0128	0.00735	0	0.00822	0.0102	0.00742	0.0338	0	0	0	0	0.0109	0	0	0	0	0.00748	0.0369	0	0.0129	0	0	0.0122	0.00697	0	0.00999	0.013	0	0	0	0.0387	0.0118	0	0	0	0.0112	0.0325	0	0.0139	0	0	0.00708	0	0
ADH1B	0	0	0	0	0	0	0	0	0	0	0	0	0	0	0	0	0	0	0	0.00344	0	0	0	0	0.0036	0	0	0	0	0	0	0	0	0	0	0.00542	0	0	0	0	0	0	0	0	0	0	0	0	0
ADH1C	0	0	0	0	0	0	0	0	0	0	0	0	0	0	0	0	0	0	0	0	0	0	0	0	0	0	0	0	0	0	0	0	0	0	0	0	0	0	0	0	0	0	0	0	0	0	0	0	0
ADH4	0	0	0.0227	0	0	0.00971	0.0167	0	0.00623	0.0154	0	0.0064	0	0	0.00721	0.00682	0.0248	0	0	0	0	0.00566	0.0233	0.00565	0	0	0	0	0	0	0	0	0	0	0	0	0.00447	0	0	0	0.00851	0.0041	0	0.0105	0.0068	0	0.00537	0	0
ADH5	4.64	5.92	3.81	4.94	4.42	4.76	7.46	5.61	5.64	5.66	7.5	5.81	5.36	6.05	5.63	6.93	7.2	4.12	6.33	5.27	4.94	4.85	6.91	5.2	6.13	5.17	4.2	9.64	6.93	5.33	6.63	6.85	7.13	4.95	4.7	6.57	7.79	5.3	4.98	3.99	3.75	5.81	5.05	6.53	4.9	5.4	5.81	6.21	6.7
ADH6	0.00866	0	0.0262	0.0126	0.042	0.0128	0.055	0.011	0.0656	0.0355	0.0444	0.00843	0.00718	0.0353	0.0427	0.0449	0.0163	0	0.00646	0.0399	0.0389	0.0187	0.0153	0.0298	0.0385	0.0357	0.00691	0.0335	0.0139	0.026	0.00997	0.013	0.0157	0.00792	0.0454	0.0145	0.0206	0.0203	0.00965	0	0.028	0.0405	0.0109	0.0451	0.0403	0.00507	0.0106	0.037	0.0251
ADH7	0	0	0	0	0	0	0	0	0	0	0	0	0	0.00737	0	0	0	0	0	0	0	0	0	0	0	0	0.00867	0	0	0	0	0	0	0	0	0.00606	0	0	0	0	0	0	0	0	0	0	0	0.00662	0
ADHFE1	3.75	2.75	3.5	2.36	1.87	3.28	5.39	4.63	4.67	2.74	5.84	4.53	3.86	2.83	2.99	4.97	2.92	1.7	6.58	3.93	2.74	3.09	3.63	5.84	4.57	3.37	2.73	3.31	3.38	6.35	2.39	3.36	1.81	2.63	1.7	3.98	4.25	4.27	3.64	1.98	2.3	3.52	5.3	4.39	4.75	2.67	3.4	4.36	3.33
ADI1	15.6	13.8	18.5	15.2	18.8	12.4	13	14.4	13.1	19.1	17.2	21.1	17	28.2	12.8	18.6	21.8	20.5	16.5	15.1	20.2	17.9	15.9	14.8	15.4	19	16.1	14.8	17.8	11.9	14.8	18.1	18.4	16.9	11.1	14.5	14.1	29.7	17.6	13.4	12.2	12.9	17	14.5	11	15	12.8	18.2	14.2
ADIG	0	0	0.0146	0.0246	0	0.025	0	0	0.016	0.0396	0.0289	0	0	0	0	0.0175	0	0	0	0.012	0	0.0146	0.012	0	0	0.0278	0.0809	0	0.0136	0.0608	0	0	0.0306	0	0	0.0377	0	0	0.0188	0.064	0.0438	0	0	0.0135	0.0524	0	0	0.0206	0
ADIPOQ	0.00563	0.0127	0.00728	0.0123	0	0.00831	0.0119	0	0.0107	0	0.0024	0	0	0	0.00617	0.00583	0	0	0.00839	0.00796	0.00421	0.00242	0.00399	0.00483	0.00209	0	0.00449	0.00593	0	0.00337	0.0129	0	0	0	0.00369	0.00314	0.00574	0.00529	0	0.0106	0	0.00526	0.00237	0.00675	0.00291	0.00329	0.00229	0.0206	0
ADIPOQ-AS1	0.00756	0.00856	0.00979	0.0055	0	0.0112	0.0192	0	0.0107	0.00443	0.0129	0	0.00627	0.0103	0.00829	0.00784	0.00476	0.0157	0.0113	0	0	0.00977	0.00536	0.00325	0.00561	0	0.0121	0.00531	0	0.00907	0.00435	0	0	0	0.00496	0	0.00515	0.00711	0	0.0191	0	0.00236	0	0.00908	0	0.00885	0.00309	0.023	0
ADIPOR1	629	850	93.5	256	314	504	84.4	119	126	155	158	121	371	200	193	146	187	219	241	67.6	156	111	81.3	96.4	134	262	287	107	96.5	122	119	322	228	324	203	115	72.5	97.8	229	150	161	39.7	61	67.4	222	249	132	151	121
ADIPOR2	14.1	12.2	13.1	12.6	18	12.6	11.9	11.9	11.6	13.1	12	11.6	14	14.4	12	10.8	14.3	16.1	11.3	13	17	15.1	10	12	10.3	12.9	17.6	11.8	12.6	12.6	12.6	11.1	14.8	13.7	11.5	9.7	10.7	12.8	12.6	15.6	14.8	11.5	12.7	11.1	12.4	14.1	13.2	10	13
ADK	2.92	7	4.07	3.75	2.82	2.37	4.44	8.22	3.73	3.5	4.53	7.17	4.74	6.5	5.1	4.59	4.23	3.24	2.45	4.99	5.39	6.8	7.78	3.52	3.9	3.52	3.41	6.69	3.79	4.63	5.1	6.38	4.89	3.47	5.84	6.71	4.57	4.09	4.05	3.28	7.44	4.3	4.5	4.58	5.84	3.56	6.18	4.22	4.92
ADM	123	61.3	25.8	44.5	63.8	95.6	45.6	21.6	28.2	33.4	13.9	37.2	38.9	36.5	26.5	21.2	55	114	20	24.8	44.5	29.3	29.1	29.5	58.2	82.2	69.4	11.1	21.5	38.2	27	38.1	78.9	62.8	84	32.4	21.5	54.2	63.2	75.1	89.2	25.6	28	23.9	63.1	48.2	40.5	33.2	39.3
ADM2	0.668	0.416	0.545	0.348	0.22	0.471	0.371	0.229	0.151	0.223	0.327	0.397	0.351	0.699	0.524	0.423	0.297	1.05	0.274	0.607	0.399	0.28	0.31	0.197	0.479	0.454	0.425	0.295	0.426	0.246	0.543	0.312	0.421	0.258	0.418	0.397	0.34	0.489	0.42	0.382	0.583	0.403	0.435	0.358	0.187	0.358	0.335	0.403	0.316
ADNP	9.44	6.75	13.6	11.4	16.3	12	10.4	9.75	11.9	12	9.18	9.98	8.53	7.44	10.3	9.44	11.9	9.98	7.17	10.8	6	13.4	10.3	10.6	11.1	13.3	14	13.2	12.6	11.3	12	7.41	6.12	9.13	12.1	9.75	9.68	8.54	9.2	16.3	15.4	11.6	10.4	8.96	12.8	9	13.2	8.71	7.88
ADNP2	2.46	1.49	3.03	2.7	2.17	2.29	2.67	2.29	2.36	2.5	2.22	2.63	2.27	1.71	2.37	2.64	2.87	1.93	2.25	2.83	1.75	2.6	2.92	2.24	2.56	2.18	2.77	3.01	3.28	3.24	2.57	1.86	1.8	1.83	2.44	2.31	2.61	1.92	1.99	3.1	2.54	2.71	2.45	2.37	2.58	2.54	2.8	2.2	2.08
ADO	2.84	3.34	3.51	3.75	2.35	3.08	4.28	3.73	3.57	4.31	3.75	3.78	3.54	3.19	3.56	3.97	3.75	1.77	5.12	4.14	2.67	3.7	4.38	3.53	3.86	2.68	2.67	5.01	4.47	4.76	4.29	3.94	2.72	2.53	3.4	4.14	4.93	3.11	2.97	3.75	3.12	4.61	4	4.76	3.64	4.35	4.3	4.54	4.32
ADORA1	0.0714	0.0202	0.624	0	0.139	0.145	0.0378	0.0903	0.0127	0.0784	0.149	0.13	0.118	0.333	0.0293	0.0833	0.0505	0.306	0.0732	0.0884	0.221	0.188	0.0569	0.0536	0.0695	0	0.0712	0.119	0.408	0.155	0.0257	0.0667	0.0242	0.0408	0.0176	0.0697	0.1	0.0461	0.0646	0.0731	0.0173	0.0807	0.0263	0.0321	0.0277	0.0365	0.138	0.0163	0.0646
ADORA2A	17.5	38.9	15.5	13.2	16.5	14.7	12.4	16.9	10.4	13.7	17.5	17.2	20.1	22.5	17	21.7	15.2	11.4	13.5	19.9	15	16.4	15	14.6	19.8	10.3	13.7	14.7	15.1	14.2	14.2	18.1	21.9	16.9	10.5	17.8	13.7	16.1	17.9	11.3	14.9	11.1	14.4	11.7	12.2	10.3	11.1	24	10.4
ADORA2B	0.511	0.703	0.638	0.573	0.804	0.796	0.468	0.42	0.275	0.972	0.567	0.524	0.733	0.553	0.719	0.494	0.521	0.489	0.587	0.543	0.611	0.708	0.954	1.74	0.512	0.694	0.474	1.08	0.749	0.646	0.819	0.403	0.325	0.354	0.353	0.331	0.484	0.811	0.393	0.792	0.868	0.603	0.941	0.735	0.643	0.679	0.913	0.631	0.407
ADORA3	1.73	2.45	1.32	6.82	1.73	1.31	0.66	4.79	3.04	1.1	0.692	1.8	1.7	1.47	1.03	3.09	2.39	2.64	2.07	2.18	4.65	5.12	0.901	4.45	1.89	4.26	4.81	1.05	1.18	0.733	0.998	0.863	1	3.56	1.24	1.28	0.535	9.44	2.44	3.68	1.12	0.591	1.56	0.927	1.08	1.92	2.46	0.908	0.487
ADPGK	33.9	44.7	38.3	50.9	42.7	49.1	41.6	45.1	46.6	45.1	34.3	34.5	31.3	30.5	36.5	36.8	41.9	41.4	39.2	30.8	35.9	44.6	39.7	46.6	41.8	48.8	63.4	33.4	37	32.9	32.6	37.4	37	46	45	39	38	37.5	29.9	49	40.1	43.9	35.7	32.1	44.9	39.7	36.1	32.9	29.8
ADPRH	3.59	3.42	3.64	1.4	3.42	1.92	3.38	1.59	1.37	3.85	2.24	2.44	3.23	4	2.48	2.57	3.08	3.67	2.76	3.89	4.4	3.58	2.01	1.47	1.8	2.76	2.31	3.14	4.2	3.49	4.32	2.58	5.42	1.94	2.89	2.51	3.35	3.22	3.05	4.64	3.62	4.86	5.58	4.38	3.53	5.66	4.03	2.4	5.24
ADPRHL1	0.455	0.434	0.455	0.453	0.244	0.354	0.218	0.334	0.329	0.323	0.154	0.303	0.318	0.317	0.282	0.572	0.241	0.524	0.268	0.31	0.413	0.248	0.144	0.401	0.311	0.158	0.401	0.261	0.226	0.302	0.248	0.314	0.336	0.329	0.189	0.181	0.216	0.524	0.274	0.242	0.388	0.25	0.257	0.23	0.421	0.161	0.152	0.226	0.306
ADPRHL2	22.2	21.4	23.6	17.5	33	14.5	15	21.1	17.1	15.2	20.6	19.8	24.4	26	17.4	20	23.9	23.2	22	19.3	35.9	24	16.6	19.4	15.8	18.1	28	13.6	20.3	18.1	20	21.2	41.9	35.6	16.6	19	17.1	26.6	22.9	26.5	25.1	20.1	23.7	23.1	19.5	23.1	17.1	18.6	19.1
ADRA1A	0	0	0	0	0	0	0.0031	0	0	0	0	0	0	0	0	0	0	0	0	0	0.00548	0	0	0	0	0	0	0	0	0	0	0	0	0	0	0	0	0	0	0.00461	0	0	0	0	0	0	0	0	0
ADRA1B	0	0	0	0	0	0	0	0	0	0	0	0	0	0	0	0	0	0	0	0	0	0	0	0	0.00428	0	0	0	0	0	0	0.00864	0	0	0.00758	0	0.00393	0	0	0	0	0.0108	0	0	0.0119	0	0	0	0
ADRA1D	0	0	0	0	0	0	0	0	0	0.00572	0	0	0	0	0	0	0	0	0.00729	0	0	0.00421	0	0.00419	0	0	0	0	0	0	0	0	0	0	0	0	0.00664	0.00459	0	0.00616	0	0	0	0	0	0	0	0	0.00471
ADRA2A	0.155	0.0684	0.194	0.0587	0.228	0.0397	0.0171	0.0213	0.0223	0.0315	0.0488	0.0458	0.0278	0.082	0.0442	0.0766	0.106	0.224	0.0451	0.0428	0.166	0.0955	0.0333	0.0115	0.13	0.122	0.0911	0.0448	0.0513	0.0564	0.0464	0.0402	0.0668	0.0799	0.0969	0.03	0.0846	0.0442	0.0749	0.114	0.0478	0.0189	0.0565	0.0188	0.0556	0.0236	0.0411	0.0901	0.0324
ADRA2B	0	0	0	0.0058	0.00774	0.0118	0.0101	0.00505	0.0302	0.00935	0.0136	0.0272	0.00661	0.0108	0.0131	0.0165	0.01	0.00829	0.00595	0.00282	0.0299	0.00687	0	0.0171	0.00887	0	0.0127	0.0112	0.0128	0.00956	0	0.0239	0.0144	0.0146	0.0105	0.0133	0.0163	0.0262	0.0133	0.00503	0	0.00497	0.0101	0.00957	0.00824	0	0.00651	0.0243	0.0115
ADRA2C	0	0	0	0	0	0	0	0	0	0	0	0	0	0	0	0	0	0	0.0397	0	0	0	0	0	0	0	0	0	0	0	0	0	0	0	0	0	0	0	0	0	0.00861	0	0	0	0	0	0	0	0
ADRB1	0.146	0.247	0.204	0.139	0.185	0.188	0.273	0.178	0.159	0.325	0.0505	0.319	0.181	0.191	0.105	0.255	0.132	0.00946	1.29	0.155	0.123	0.219	0.113	0.105	0.152	0.0674	0.0218	0.144	0.0365	0.218	0.162	0.266	0.107	0.0666	0.179	0.0812	0.238	0.115	0.101	0.0975	0.194	0.355	0.245	0.12	0.263	0.25	0.29	0.216	0.123
ADRB2	10	7.75	7.51	11.7	10.1	11.5	9.9	8.55	10.9	7.61	7.62	10.4	12.7	7.8	7.88	6.68	10.9	2.69	22.4	6.2	12	13.6	7.86	16.1	8.27	10.8	8.06	7.29	6.07	13.1	7.04	9.84	7.66	6.94	9.41	6.84	9.99	6.49	8.9	11.7	6.3	10.3	11.2	8.53	13.5	14.2	9.98	6.5	11.2
ADRB3	0	0	0	0	0	0	0	0	0	0	0	0	0	0	0	0	0	0	0	0	0	0	0	0	0.00729	0	0	0	0	0	0	0	0	0	0	0	0	0	0	0	0	0	0	0	0	0	0	0	0
ADRBK1	258	249	223	323	361	271	150	206	181	190	164	196	230	260	213	196	196	323	242	203	218	231	178	211	210	231	313	103	156	177	161	195	216	291	202	171	138	229	228	236	289	163	201	148	202	198	173	211	155
ADRBK2	3.75	2.1	5.67	3.1	3.34	3.26	4.94	3.45	3.23	5.99	3.56	3.99	4.76	3.86	3.77	2.98	4.61	4.76	3.6	3.98	4.2	4.95	3.89	3.49	3.19	3.7	3.31	5.06	5	4.63	4.68	2.43	3.28	2.34	4.57	3.77	4.21	4.99	3.46	4.99	3.46	4.67	5.46	3.95	5.25	4.9	6.05	3.26	2.97
ADRM1	53.2	42.9	45.2	46.9	65.6	34.4	33.7	35.9	28.2	37.2	38.9	43.1	62.3	70.2	43.5	43.4	47.6	68.8	53.9	54.4	87.5	47.7	31.9	34.9	32.4	47	42.9	23.8	37.7	40.3	43.8	49.8	90.2	57.4	31.6	31.2	35.2	54.3	49.2	40.8	42.4	34	47.4	37.5	29.7	49.6	41.8	35.9	42.8
ADSL	17.2	22	16.5	15.7	13.6	15.6	20.2	19.9	16.8	20.6	22.8	21.8	22.3	28.8	20.1	21.3	21.4	20.2	19.7	22.6	25.9	17.4	20.5	16.4	21.5	16.9	12.5	26.9	22.6	16.7	22.1	24.8	32.2	17.1	16	22.5	21	24.2	21.5	12.6	14.4	22	20	24.4	15.8	20.4	19.3	24.2	25.1
ADSS	12.6	12.3	12.7	10.2	12.1	12.4	12.9	13.3	12.3	16	14	12	12.8	12.5	13.7	12.3	14.9	18	11.2	12.8	9.75	14.5	12.6	14.2	11.1	11.5	14.4	15.4	14.7	14.3	16.6	12.2	11	9.89	11	12.9	15.2	11.1	14.5	15.2	14.5	12.9	13.4	12	12	12	14.7	14.4	9.92
ADSSL1	0.301	0.241	0.454	0.328	0.255	0.296	0.324	0.539	0.362	0.58	0.434	0.518	0.364	0.289	0.439	0.611	0.41	0.365	0.608	0.421	0.648	0.41	0.448	0.199	0.376	0.392	0.45	0.387	0.704	0.451	0.469	0.459	0.453	0.206	0.37	0.524	0.644	0.33	0.51	0.332	0.406	0.277	0.4	0.406	0.253	0.506	0.455	0.558	0.284
ADTRP	1.08	1.14	0.986	1.21	0.544	2.51	1.93	1.68	2.01	1.45	2.86	1.75	1.19	2	1.84	2.78	1.27	0.889	0.418	1.73	0.714	1.71	2.01	0.698	1.57	0.681	1.24	4.77	2.52	1.23	1.07	1.18	1.23	1.06	1.95	1.38	2.09	1.27	1.12	0.91	0.789	3.12	1.09	1.68	1.34	1.3	0.823	1.56	0.913
AEBP1	1.14	0.606	2.14	1.27	0.347	0.994	1.44	0.904	1.7	1.07	2.02	1.03	1.15	1.84	1.88	1.82	0.803	0.903	0.414	3.9	1.32	1.13	1.11	0.564	1.51	1.15	1.09	2.12	1.92	1.25	1.78	0.582	1.75	2.37	1.21	2.29	1.32	2.31	1.64	0.68	1.09	1.31	1.24	2.05	1.4	0.612	2.18	2.33	1.16
AEBP2	1.37	1.82	1.63	1.78	1.74	1.93	2.13	1.84	2.12	2.32	1.99	2.03	1.22	1.25	2.16	1.78	1.57	1.04	2.07	1.71	1	1.94	2.48	2.48	1.97	1.55	1.72	3.18	2.52	2.72	2.23	2.09	1.38	1.39	1.6	2.16	2.73	1.22	1.45	1.87	1.76	2.39	1.66	2.67	2.21	2.16	2.1	1.81	1.88
AEN	4.42	7.05	4.84	6	3.74	4.91	6.36	7.03	6.41	3.86	6.87	6.27	7.5	6.67	6.42	7.73	5	3.98	8.95	7.75	4.68	4.84	7.67	5.44	6.01	4.38	4.27	7.16	5.62	5.76	7.83	8.51	6.78	4.87	6.43	6.67	7.19	6.3	5.32	3.88	7.44	6.66	6.33	7.63	5.12	8.85	7.03	7.57	9.02
AES	185	168	173	160	155	120	187	168	140	149	238	229	271	296	220	264	169	111	283	255	275	148	214	149	188	130	95	218	196	224	209	257	322	184	113	230	215	233	217	93.2	134	145	197	221	138	214	154	264	240
AFAP1	1.06	0.193	1.33	1.73	0.959	1.34	0.384	1.06	0.544	1.94	0.503	0.7	0.834	1.22	0.369	1.23	0.651	0.296	0.77	1.23	0.296	0.427	1.77	0.328	1.49	0.444	2.6	0.507	1.1	0.998	0.469	1.03	0.179	0.224	0.991	0.411	0.71	0.907	0.458	0.554	1.9	0.713	0.561	0.313	1.28	0.272	0.473	0.451	0.205
AFAP1-AS1	0.0958	0.0303	0.104	0.137	0.108	0.0821	0.0211	0.0606	0.049	0.18	0.036	0.0783	0.0572	0.0936	0.063	0.107	0.0651	0.0439	0.0686	0.118	0.0517	0.038	0.172	0.0395	0.146	0.0505	0.205	0.0444	0.0908	0.113	0.0375	0.106	0.0173	0.0456	0.108	0.047	0.107	0.0504	0.0406	0.0507	0.201	0.0729	0.0757	0.0291	0.145	0.0628	0.05	0.0327	0.0185
AFAP1L1	0.0185	0.00699	0.0187	0.0135	0.024	0.00913	0.00523	0.0156	0.0176	0.0217	0.0185	0.015	0.0461	0.0294	0.0745	0.00641	0.0194	0.0257	0.00461	0.0394	0.00463	0.00798	0.0219	0.0159	0.0115	0.056	0.0394	0.0369	0.149	0.0111	0.0178	0.0139	0.0447	0.0283	0.0284	0.0586	0.00841	0.0407	0.0138	0.0117	0.02	0.0154	0.0208	0.00989	0.0192	0.0145	0.0177	0.0339	0.0209
AFAP1L2	0.694	0.533	0.523	0.519	0.547	0.503	0.732	0.489	0.605	0.48	0.753	0.743	0.69	0.28	0.61	0.553	0.383	0.204	0.479	0.82	0.397	0.381	0.712	0.419	0.51	0.593	0.308	0.741	0.628	0.797	0.893	0.843	0.515	0.761	0.606	0.588	0.864	0.505	0.584	0.438	0.534	0.443	0.683	0.713	0.535	0.418	0.999	0.535	0.547
AFF1	9.72	7.01	9.09	9.28	9.39	10.5	10.3	6.41	7.29	7.14	5.04	4.49	4.73	3.29	5.78	4.94	6.95	6.92	5.84	4.48	3.11	8.42	7.31	6.59	9.56	12.9	12.9	5.89	7.86	9.32	7.15	7.55	3.16	11.2	28.8	7.86	6.79	4.38	6.64	24	15.2	8.59	6.63	6.88	18.2	10.3	10.5	5.55	6.91
AFF2	0.0656	0.155	0.0825	0.131	0.237	0.0748	0.0341	0.0558	0.169	0.26	0.0417	0.0484	0.0451	0.0865	0.0822	0.0437	0.079	0.334	0.0476	0.077	0.0365	0.116	0.0618	0.087	0.089	0.122	0.197	0.083	0.128	0.0405	0.0464	0.0463	0.078	0.122	0.0627	0.0617	0.115	0.1	0.112	0.194	0.141	0.0813	0.0639	0.036	0.0737	0.0702	0.039	0.111	0.0588
AFF3	0.606	0.362	1.62	1.32	0.157	0.894	1.36	0.831	1.39	0.63	1.06	1.01	0.66	0.174	1.52	1.23	0.536	0.524	0.433	1.11	0.461	0.916	1.58	0.539	1.19	1.4	0.822	2.43	0.777	0.922	0.916	0.261	0.315	0.913	2.34	1.14	1.12	0.661	0.73	0.368	0.347	0.983	0.677	0.933	1.18	0.139	2.04	0.238	0.796
AFF4	4.26	4.54	5.46	5.3	5.14	7.02	5.3	5.27	5.69	5.35	3.6	4.05	2.71	2.22	4.23	3.76	4.45	3.67	3.47	3.61	2.78	5.08	5.61	4.88	5.15	5.61	7.7	5.9	5.11	5.45	4.33	3.61	2.63	4.42	7.23	4.63	5.45	2.7	3.61	9.02	7.84	6.01	3.9	4.54	6.83	4.95	5.98	4.25	3.57
AFG3L1P	3.38	2.7	3.32	3.33	2.25	3.36	4.43	3.97	4.24	3.63	4.66	3.6	4.14	2.77	4.13	4.2	2.88	2.47	4.73	3.82	2.62	2.99	4.41	3.78	4.37	3.17	2.83	4	3.3	4	3.44	3.24	2.36	2.7	3.21	4.04	3.45	4.01	3.78	2.44	2.57	3.59	3.74	3.87	3.49	2.94	3.64	4.11	3.53
AFG3L2	5.4	4.92	5.67	4.95	5.27	4.31	5.83	5.26	4.72	6.5	6.41	6.75	6.66	7.38	5.22	5.58	6.83	5.4	5.51	7.06	9.28	6.57	6.02	4.89	5.2	5.28	4.27	6.97	7.39	6.26	8.54	5.76	10.1	5.05	5.06	5.9	6.94	5.97	5.49	5.37	4.99	6.66	7.5	6.6	5.25	6.7	7.11	5.55	6.52
AFM	0	0	0	0	0	0	0	0	0	0	0	0	0	0	0	0.00676	0	0.0136	0	0	0	0	0	0	0.00483	0	0	0	0	0	0	0	0	0	0	0	0	0	0	0	0	0	0	0	0	0	0	0	0
AFMID	1.48	1.27	1.83	0.991	1.13	1.42	1.74	1.56	1.38	1.65	1.82	1.05	1.62	1.31	1.64	1.56	1.4	1.49	1.42	1.74	1.69	1.28	2.37	1.43	1.19	1.17	1.48	1.3	1.57	1.7	1.02	2.05	1.37	1	0.988	1.63	1.76	1.6	1.32	1.31	0.913	1.82	1.88	1.9	1.18	1.51	1.6	1.64	1.73
AFP	0	0	0	0	0	0	0	0	0.00607	0	0	0	0	0	0	0	0	0	0	0	0	0	0	0	0	0	0	0	0	0	0	0	0	0	0	0	0	0	0	0	0	0	0	0	0	0	0	0	0
AFTPH	15.7	16.8	15	15.4	22.8	19	15.6	16.2	13.4	15.2	11.7	14.5	13.8	12.4	15.6	13.4	18.4	21.2	9.36	13.2	14.8	19.5	14.1	16.6	15	23.7	27.8	14.7	16.7	13.2	16.8	11.9	14.9	16.9	17.9	13.1	12.9	14.8	15.2	25	24.9	17.5	14.1	13.6	19.5	14.2	17.2	13	13.6
AGA	4.95	3.46	4.52	4.69	5.76	3.24	5.59	5.33	4.74	6.38	5.7	5.86	7.34	5.75	5.63	5.51	4.28	6.09	6.37	5.16	6.65	6.12	5.31	5.64	5.47	4.85	4.58	7.25	5.66	5.31	4.62	5.76	5.67	4.02	2.96	5.62	6.7	5.31	5.24	3.53	3.66	5.87	5.55	8.26	4.24	5.21	4.99	5.21	5.86
AGAP1	0.263	0.111	0.247	0.206	0.325	0.0685	0.286	0.323	0.21	0.218	0.297	0.336	0.346	0.133	0.232	0.281	0.233	0.0268	1.87	0.151	0.162	0.231	0.385	0.461	0.38	0.195	0.21	0.255	0.19	0.859	0.279	0.228	0.0466	0.0849	0.071	0.118	0.272	0.143	0.282	0.244	0.107	0.0885	0.241	0.0764	0.568	0.241	0.208	0.119	0.269
AGAP11	0.0248	0.028	0.057	0.036	0	0.0487	0.0279	0.0157	0.0586	0.0484	0.0423	0.0683	0.0753	0	0.0317	0.0257	0.0208	0.00859	0.0677	0.0643	0	0.0355	0.0848	0.0213	0.0398	0.0136	0.0132	0.0493	0.0563	0.0346	0.057	0.0432	0.00746	0.0302	0.0325	0.023	0.0168	0.0194	0.0322	0.052	0.0107	0.0386	0.0243	0.0661	0.0213	0.0145	0.0673	0.0704	0.0398
AGAP1-IT1	0	0	0	0	0	0	0	0	0	0	0.0168	0	0	0	0	0.0203	0	0	0	0	0.0588	0	0	0	0.0145	0	0	0	0	0	0	0.0293	0	0	0	0	0	0	0	0	0	0	0.0165	0	0	0	0.032	0	0
AGAP2	16.4	16.5	16	25.5	27.1	17.1	12.1	15.3	14.1	11.1	14.8	14.3	15.3	16.4	14.7	16.7	14.9	24.3	20.5	16.3	12.1	15.5	13	16.9	15.3	21.2	23.2	9.75	12.6	16	13.7	15.2	13	19.1	14	12.8	11.8	16.6	16.1	16.4	19.3	9.31	16.2	11	15.5	13.9	12.8	15.8	13.2
AGAP3	5.63	5	6.35	4.36	5.63	4.84	4.87	5.89	4.1	7.42	5.87	6.89	9.38	10.9	5.55	6.67	7.71	7.56	8.53	9.76	6.96	6.24	6.94	5.74	6.57	4.08	3.59	4.31	6.92	6.94	5.31	5.2	5.94	3.78	2.51	4.52	6.18	8.38	6.32	3.65	4.9	5.51	7.43	4.81	4.89	6.15	5.8	7.07	4.28
AGAP4	0.0214	0.0606	0.0555	0.039	0.0312	0.0949	0.0499	0.0407	0.00507	0.0126	0.0549	0.0365	0.0266	0.0363	0.0293	0.0167	0.0472	0.0111	0	0.0227	0.0241	0.0369	0.0531	0.0506	0.0516	0.0882	0.0342	0.0828	0.0301	0.0257	0.0185	0.0321	0.0871	0.0196	0.0632	0.00598	0.0474	0.0201	0.0358	0.054	0.00694	0.0468	0.027	0.0257	0.0775	0.0188	0.0131	0.0718	0
AGAP5	0.0322	0.0486	0.0371	0.039	0.0417	0.0634	0.0863	0.0543	0.0864	0.0315	0.119	0.047	0	0.0437	0.0588	0.0835	0.0135	0	0.136	0.0646	0.00804	0.0508	0.0646	0.0599	0.0716	0.0795	0.0514	0.0528	0.056	0.0901	0.0494	0.0642	0.0097	0.0491	0.0282	0.0839	0.0767	0.00504	0.0478	0.0135	0.0208	0.0636	0.0406	0.0515	0.0943	0.0377	0.0569	0.0327	0.0518
AGAP6	0.357	0.319	0.45	0.431	0.201	0.416	0.529	0.458	0.699	0.44	0.393	0.53	0.6	0.351	0.556	0.511	0.319	0.283	0.547	0.422	0.225	0.429	0.582	0.468	0.401	0.449	0.337	0.686	0.441	0.586	0.508	0.408	0.272	0.344	0.499	0.519	0.508	0.477	0.298	0.397	0.31	0.53	0.502	0.508	0.452	0.324	0.387	0.464	0.431
AGAP7	1.05	0.207	0.766	1.1	1.46	0.508	0.0956	0.347	1.01	0.713	0.736	0.414	0.464	0.694	0.914	0.357	0.508	0.571	0.377	0.415	1.08	1.68	0.476	0.993	1.2	1.23	1.28	0.563	0.367	0.316	0.204	0.427	0.195	0.699	1.14	0.402	0.0732	0.662	0.821	0.326	0.766	0.221	0.154	0.478	0.823	0.208	0.101	0.8	0.0883
AGAP8	0.0108	0.0243	0.0232	0.047	0.0731	0.00794	0.0273	0.0613	0.0764	0.0189	0.0276	0.00524	0.0357	0.0365	0.0118	0.0837	0.00677	0.101	0.0401	0.0114	0.0242	0.0278	0.0305	0.0185	0.0319	0.0797	0.0515	0.0264	0.0259	0.0452	0.0619	0.00805	0.00973	0.0197	0.00706	0.132	0.0403	0.0809	0.012	0.0678	0.0557	0.00336	0.0452	0.0388	0.0167	0.0441	0.0571	0.0393	0.0104
AGAP9	0.0109	0	0	0.00794	0	0	0.00462	0	0	0	0	0	0	0	0	0	0	0	0	0	0	0.0094	0.00386	0.00468	0	0	0	0.00383	0	0	0	0	0	0	0	0	0.00371	0	0.0122	0.00688	0	0	0.00917	0.00437	0	0	0.00445	0.00665	0
AGBL1	0	0	0	0	0	0	0	0	0	0	0	0	0	0	0	0	0	0	0	0	0.00558	0	0	0	0	0	0	0	0	0	0	0	0	0	0	0	0	0	0	0	0	0	0	0	0	0	0	0	0
AGBL2	0.464	0.32	0.472	0.427	0.155	0.482	0.669	0.573	0.604	0.348	0.526	0.441	0.348	0.246	0.528	0.473	0.219	0.143	0.53	0.423	0.179	0.25	0.66	0.482	0.572	0.364	0.364	0.69	0.486	0.543	0.492	0.342	0.21	0.411	0.779	0.764	0.619	0.361	0.464	0.256	0.366	0.484	0.591	0.656	0.42	0.424	0.503	0.53	0.577
AGBL3	0.111	0.15	0.111	0.156	0.0286	0.136	0.168	0.131	0.147	0.143	0.214	0.0969	0.122	0.09	0.222	0.168	0.0973	0.00767	0.104	0.154	0.0552	0.0952	0.232	0.0791	0.235	0.146	0.0764	0.251	0.127	0.115	0.127	0.154	0.12	0.0741	0.232	0.218	0.286	0.0796	0.0862	0.13	0.162	0.177	0.152	0.227	0.16	0.121	0.165	0.229	0.132
AGBL4	0	0	0.00376	0.019	0	0.00643	0.00369	0.00551	0	0	0.00372	0.00424	0.0145	0	0	0.00452	0	0.00907	0.0065	0.00617	0	0	0.0123	0.015	0.00323	0.0215	0.00695	0.00918	0.028	0.0157	0.00501	0	0.00788	0	0.0229	0.00973	0.00889	0.00409	0	0	0	0.0136	0.00366	0.014	0.00901	0	0.00356	0.0106	0
AGBL5	18.4	16.4	9.13	5.95	11.6	8.32	7.94	10.2	8.16	7.45	8.91	10.4	15.6	13.9	11.1	10.4	10.7	13.9	7.7	9.04	19.2	6.38	7.69	7.09	8.31	11.6	7.67	10.2	7.84	7.36	8.39	14.4	13.2	11	9.15	9.88	7.87	10.4	12	6.14	7.06	6.93	8.81	7.62	6.83	9.3	6.8	13.3	11.7
AGER	29.6	26.8	28.4	25.2	58	37.4	24	20.4	23.6	21.5	16.7	16.2	28.8	31.6	24.9	20.5	18.2	58.8	19.2	18.3	53.2	20.3	11.7	23.3	27.7	30.6	42.4	12.1	13.4	17	19.1	16.2	33.4	28.1	25	18.9	8.45	40.1	39.5	23.3	34.8	19.8	20.7	19.5	25.3	32.5	16.7	27	20.5
AGFG1	5.73	10.1	8.48	13.2	16.1	13.4	6.15	11.7	8.33	8.08	5.63	7.31	6.17	6.8	6.76	5.71	8.52	15.5	5.59	6.23	7.38	12.3	5.7	11.9	6.28	16.3	19.1	7.33	7.46	5.9	6.92	6.02	5.23	14.1	9.46	5.62	6.19	7.02	5.98	21.1	9.02	7.87	6.74	6.09	7.88	7.64	10.4	6.3	5.18
AGFG2	3.48	1.98	3.34	3.02	3.72	2.45	4.52	3.18	2.79	2.87	4.36	4.89	4.73	5.34	3.92	5.39	3.94	2.18	6.4	6.31	3.84	2.92	4.88	3.94	4.2	1.93	1.9	3.8	3.41	5.1	4.41	3.61	3.09	2.45	2.02	3.31	2.96	4.79	4.21	1.82	2.55	2.63	4.07	2.83	3.5	3	2.96	3.06	3.92
AGGF1	3.69	4.29	3.94	4.7	4.22	4.94	4.42	4.63	4.56	5.44	4.28	4.08	3.32	3.21	4.37	4.17	4.46	4.19	3.92	3.61	1.89	5.28	4.81	4.51	4.9	5.66	5.72	6.1	5.65	4.61	4.8	3.85	3.18	4.12	4.59	4.7	5.26	3.27	3.16	6.16	5.06	5.34	4.02	4.44	4.94	4.82	5.21	4.27	4.25
AGK	6	4.23	6.49	4.94	4.09	5.92	10.4	8.43	6.62	5.94	9.59	7.54	7.79	6.03	7.24	8.44	6.73	3.28	8.42	8.42	4.69	6.53	8.97	7.49	7.5	4.83	4.72	8.74	6.97	7.88	9.11	8.04	5.49	5.78	5.26	8.53	8.39	6.75	8.35	5.87	4.46	7.83	7.77	9.32	6.88	5.46	8.05	8.08	8.88
AGL	0.913	1.31	1.06	1.71	0.941	1.53	1.7	1.51	1.84	1.86	1.39	1.3	0.786	0.688	1.38	1.37	0.99	0.808	1.33	1.04	0.468	1.32	1.92	2.05	1.72	1.24	1.52	2.65	1.75	1.89	1.42	1.35	0.871	1.02	1.81	2.04	1.92	0.807	0.796	1.53	1.41	1.95	1.09	1.59	2.2	1.14	1.49	1.2	1.27
AGMAT	0.818	1.02	1.33	0.835	0.649	0.987	1.59	1.42	0.837	0.881	1.68	1.02	1.06	1.79	1.95	1.86	1.01	0.678	0.456	1.65	1.43	1.08	1.78	0.603	1.76	0.856	0.685	2.85	2.17	1.17	1.55	1.8	1.63	1.4	1.32	1.89	1.99	1.19	1.29	0.703	1.32	1.66	1.43	1.53	0.657	1.01	1.31	2.42	1.65
AGMO	0.0947	0.0476	0.00908	0.122	0.0102	0.342	0.0356	0.16	0.0548	0.148	0.027	0.041	0.0174	0.0214	0.0519	0.0273	0.0529	0.0876	0.0235	0.00745	0.00788	0.122	0.0261	0.113	0.0429	0.0866	0.302	0.0222	0.0127	0.0505	0.0182	0.0157	0.00951	0.0577	0.241	0.0176	0.00358	0.0494	0.106	0.0796	0.0749	0.0394	0.0354	0.0211	0.0707	0.00615	0.0172	0.0449	0
AGPAT1	49.4	41	40.1	32.5	59.1	29.5	24.5	24.6	24.1	22.4	24.5	28	34.8	42.2	31.5	28	34	52.4	24.4	32.3	41.4	32.4	24.8	26.7	24.6	33.4	38.7	21.7	25.5	23.9	26.6	37.1	43.2	39.3	27.3	21.8	20.2	34.9	34.7	40.1	49.1	25.6	33.8	23.9	24.4	38.5	28.6	35.4	28.3
AGPAT2	28.9	34.5	21.5	38.8	43.5	31.8	15.7	24.5	19.4	28.7	15	23.5	27.4	34.8	21.6	21.4	23	59.7	30	21.7	46.8	27.1	16.9	28.7	17.8	28.7	30	10.4	18.3	18.1	14.9	24.7	48.9	41.9	20.2	17.2	17.9	26	21.4	21.5	25.3	17.9	27.6	21.3	19.9	28.9	18.9	22.9	18.1
AGPAT3	12.1	12.7	14.8	7.65	10.3	7.56	11.2	7.83	6.7	12	10.6	10.9	15.1	14.1	9.79	9.46	10.8	10.5	15.5	13.1	12.8	10.5	11	9.22	8.31	7.85	6.2	8.69	12.1	13	13.8	12	13.8	13.3	8.08	11.5	12.1	12.8	9.57	11.2	10.6	11.8	16.1	11.7	12.4	15.3	12.8	10.5	12.2
AGPAT4	1.99	1.35	1.53	2.71	1.69	2.08	2.39	2.77	2.88	1.9	2.45	2.24	2.01	1.38	1.63	1.61	1.85	2.06	3.4	1.28	2.38	1.58	2.93	3.06	1.42	2	2.33	1.72	1.72	3.07	1.25	2.3	1.15	1.4	1.79	1.5	2.84	1.83	1.65	1.59	1.17	2.5	1.87	1.89	2.68	2.72	2.23	1.35	2.55
AGPAT4-IT1	0.683	0.457	0.547	0.943	0.541	0.823	0.537	0.899	1	0.572	0.923	0.997	0.474	0.388	0.496	0.592	0.482	0.667	0.904	0.355	1.42	0.432	1.16	0.921	0.604	0.573	0.556	0.641	0.593	1.12	0.449	0.824	0.73	0.408	0.758	0.521	0.995	0.491	0.489	0.659	0.388	0.608	0.615	0.496	1.08	0.994	0.784	0.399	0.84
AGPAT5	1.37	1.48	2.07	1.79	1.02	1.55	2.65	1.98	2.2	2.2	2.48	2.26	1.49	1.08	2.38	2.2	1.61	0.839	1.44	2.04	1.08	1.67	2.95	1.6	2.45	1.65	1.32	4.25	2.45	2.29	2.9	2.04	1.49	1.69	2.58	2.87	2.99	1.36	1.35	1.82	1.74	3.22	1.75	2.96	2.77	2.35	3.43	1.97	2.57
AGPAT6	8.55	8.3	9.49	10.4	10.8	10.1	8.08	10.3	8.91	9.12	9	9.18	9.75	10.7	8.2	9.2	8.76	14.3	11.1	10.5	12.7	9.13	8.54	10.3	8.19	10.7	12.3	9.29	7.84	8.68	9.63	7.37	9.06	9.28	7.23	8.47	8.46	9.98	8.6	7.8	7.24	8.22	10.5	8.17	8.96	8.82	9.91	8.39	7.89
AGPAT9	13.6	30.7	16.7	21.8	32.3	25.2	9.86	17.8	12.1	21.7	6.9	9.74	10.6	9.9	8.66	11.5	13.1	35	7.08	8.86	13.1	30.9	8.31	22.3	13.6	19.6	34.1	8.22	11.1	7.67	9.45	8.98	11.8	20.1	13.4	8.97	6.71	15.2	16.8	20.9	27.3	11.5	12.4	4.96	22.9	7.83	9.14	11.2	5.22
AGPHD1	0.0796	0.113	0.172	0.159	0.116	0.352	0.135	0.126	0.0942	0.14	0.195	0.3	0.0495	0.202	0.294	0.227	0.188	0.124	0.0742	0.148	0.104	0.12	0.197	0.0598	0.177	0.0491	0.0952	0.566	0.176	0.191	0.149	0.179	0.162	0.0364	0.235	0.211	0.325	0.15	0.233	0.0502	0.155	0.168	0.184	0.247	0.113	0.128	0.154	0.279	0.202
AGPS	2.22	3.29	2.65	2.2	2.54	2.79	3.38	3.1	2.54	4.25	2.57	3.03	2.28	2.28	2.76	2.68	2.97	3.48	3.05	2.77	2.14	3.1	3.17	2.96	2.81	2.36	2.43	3.92	3.6	3.52	3.74	3.53	3.12	2.18	2.67	3.24	3.95	2.44	2.33	3.66	2.68	4.07	3.03	3.7	3.45	3.53	3.81	2.99	3.11
AGR2	0	0	0.0343	0	0	0	0	0	0	0	0	0	0	0.018	0	0.0137	0	0	0	0.0187	0	0.0114	0	0	0	0	0	0.0186	0	0.0159	0	0	0	0	0	0	0	0	0	0.0167	0	0	0.0111	0	0	0	0.0432	0	0.0128
AGR3	0	0	0	0	0	0	0	0	0	0	0	0	0	0	0	0	0	0	0	0	0	0	0	0	0	0	0	0	0	0	0	0	0	0	0	0	0	0	0	0	0	0	0	0	0	0.0406	0	0	0
AGRN	5.67	4.21	1.11	1.13	0.504	0.389	0.732	0.603	0.566	0.505	0.59	0.525	0.861	0.553	0.758	0.743	0.418	0.318	1.28	1.34	0.656	0.336	0.658	0.49	0.762	0.384	0.363	0.64	2.21	4.62	3.84	7.44	7.3	2.57	9.84	5.08	3.15	3.3	2.4	6.11	12	6.4	5.96	3.24	4.74	6.33	3.33	4.03	3.44
AGRP	0.17	0.231	0.324	0.57	0.562	0.377	0.231	0.474	0.404	0.26	0.379	0.398	0.452	0.439	0.336	0.212	0.407	0.461	0.432	0.338	0.689	0.25	0.374	0.527	0.455	0.393	0.381	0.203	0.26	0.266	0.157	0.408	0.4	0.436	0.648	0.437	0.255	0.624	0.475	0.43	0.485	0.446	0.43	0.396	0.317	0.459	0.236	0.644	0.526
AGSK1	0	0	0.0526	0.0814	0.0197	0.03	0.0215	0.0257	0.0915	0.0298	0.0261	0.0594	0.00843	0.0414	0.0669	0.0211	0.0128	0.0317	0.0379	0.0288	0.0685	0.0394	0.054	0.0306	0.0905	0.0167	0.00811	0.0714	0.0572	0.0488	0.00585	0.0456	0.0643	0.0279	0.0267	0.0794	0.0277	0.0478	0.017	0.0192	0.0197	0.0285	0.00855	0.0529	0.0263	0.0535	0.0249	0.0682	0.0245
AGT	0	0	0	0	0	0	0	0	0	0	0	0	0	0	0	0	0	0	0	0	0	0	0.0143	0	0	0	0	0	0	0	0	0	0.0273	0	0.0132	0	0.00343	0	0	0	0	0	0	0	0	0	0	0	0.00486
AGTPBP1	18.4	19.5	16.9	29	28.3	43.8	14.3	26.4	22.8	23.3	12.6	17.8	12.9	12.1	15.7	12.5	24.5	33.6	13.1	11.4	14.9	22.7	15.3	25.2	16.8	42.9	45.5	12.2	15.8	14.9	11.2	10.9	10.6	20	24.7	13.2	13	11.7	16.1	31.9	23.5	14.4	11.8	12.8	23.2	14.2	15	14.3	10.2
AGTR1	0	0.0344	0	0	0	0	0	0	0	0	0	0	0	0	0	0.00525	0	0	0	0	0	0	0	0	0	0	0	0.00356	0	0	0	0	0	0	0	0	0	0	0	0	0	0	0	0	0	0	0	0	0
AGTR2	0	0	0	0	0.00872	0	0	0	0	0	0	0	0	0	0	0	0	0	0	0	0	0	0	0	0	0	0	0	0	0	0	0	0	0	0	0	0	0	0	0	0	0	0	0	0	0	0	0	0
AGTRAP	203	243	122	192	213	157	85.1	137	100	135	64.8	88.8	123	174	99.3	95.7	129	261	111	92.7	246	130	75.5	144	102	154	185	50.9	77.1	90.6	77.2	166	268	257	107	86.2	75.9	142	172	169	164	94.7	114	94.6	109	199	106	115	116
AGXT	0	0	0	0	0	0	0.0138	0	0	0	0	0.00793	0	0	0	0	0	0	0	0.00577	0	0	0	0	0	0	0	0	0	0.00977	0	0	0	0	0	0	0	0.00766	0	0.0103	0	0	0	0	0	0	0	0	0
AGXT2	0	0	0	0	0.0315	0	0	0	0	0	0	0	0	0	0	0	0	0.0113	0	0.00383	0.0162	0	0	0	0	0	0	0	0.00869	0	0	0	0	0	0	0	0	0	0	0	0	0	0	0	0	0	0	0	0
AGXT2L1	0	0	0	0	0	0	0	0	0	0	0	0	0	0	0	0	0	0	0	0.00858	0	0	0.0043	0	0	0	0	0	0	0	0	0	0	0	0	0	0	0	0	0	0	0	0.0051	0	0	0	0	0	0
AGXT2L2	24.5	25.8	25.2	28.1	27.3	24	25.3	24.9	22.9	23.2	25.9	22.7	27.8	24.8	25.7	25.3	20.8	34.4	31.5	25.4	20.9	20.1	23.8	28	25	26.8	30.4	19	20.1	23.7	23.6	26.9	28.9	30.6	24.5	26.9	20.5	33.5	33.9	25.2	24	24.4	36.4	24.7	23.1	24.6	24.5	33.5	25.7
AHCTF1	1.39	1.67	1.73	2.54	3.97	2.71	1.25	1.87	2.04	1.37	1.15	1.34	1.42	1.21	1.75	1.24	2.22	2.58	0.794	1.05	1.45	2.43	1.26	1.89	1.8	2.83	4.29	1.35	1.47	1.15	1.3	0.961	1.7	1.66	2.7	1.05	0.763	1.37	1.95	3.84	3.59	1.29	1.1	1.07	2.56	1.12	1.23	1.39	0.809
AHCY	7.26	9.06	11.9	8.53	9.41	8.57	10.4	9.39	8.35	12.3	11.2	9.26	14.5	15.4	10.6	10.8	10.5	13.7	10	11.9	15.2	10.5	8.75	7.83	7.94	8.12	7.51	10.9	11.5	9.18	10.9	13.9	11.6	10.8	7.87	9.99	9.79	12.1	8.23	6.65	8.64	10.3	11.5	11.2	6.41	9.61	11.5	10.2	11.6
AHCYL1	10.3	8.13	14.7	11.6	16.1	11.2	10.6	9.04	9.7	12.1	9.04	11	10.5	10.4	10.5	9.05	12.9	13.9	9.5	11.5	9.93	14.3	9.36	10.8	10.2	16.7	16.3	10.4	12.5	11	10.8	7.62	8.62	10.5	9.83	8.73	8.59	10.7	9.53	15.6	11.9	10.2	12.3	9.06	11.8	10.7	11.9	8.41	8.59
AHCYL2	1.81	1.65	3.63	1.97	2.57	2.38	2.51	1.9	2.24	2.74	2.79	2.34	2.35	2.49	2.64	2.23	2.62	2.38	2.23	2.71	2.33	3.06	2.82	1.89	2.62	2.08	2.03	3.1	2.85	2.6	2.81	1.75	1.23	1.73	2.16	2.49	2.23	2.43	2.07	2.67	2.26	2.28	2.8	2.15	2.43	1.91	2.54	2.26	1.93
AHDC1	1.35	1.11	1.56	1.64	1.44	1.07	1.4	1.01	1.17	0.975	1.67	1.4	1.52	1.31	1.42	1.4	1.01	0.851	2.06	1.79	0.874	1.38	1.47	1.19	1.71	1.19	1.01	1.11	1.87	2.23	1.76	1.43	0.801	1.27	1.4	1.59	1.45	1.1	1.2	1.43	1.51	1.24	1.65	1.26	2.08	1.21	2	1.44	1.2
AHI1	0.0927	0.23	0.387	0.286	0.137	0.251	0.525	0.358	0.548	0.37	0.443	0.254	0.271	0.186	0.276	0.275	0.161	0.133	0.28	0.241	0.142	0.272	0.597	0.248	0.393	0.236	0.173	0.361	0.282	0.363	0.399	0.261	0.251	0.242	0.229	0.379	0.703	0.247	0.234	0.292	0.243	0.421	0.247	0.594	0.354	0.196	0.416	0.153	0.164
AHNAK	30.5	11.6	23.9	16.8	27.7	18.1	33.7	23.6	27.3	37.4	28.2	25.7	27.3	26.9	22.2	26.8	28.9	27.8	32.8	30.7	36.6	25.6	37.2	28.2	25.5	22.7	12.5	36.5	29.5	43.7	26.3	22.3	16.9	9.44	13.7	19.9	32.3	17	23	20.7	19.4	38.7	30.6	23.2	41.8	27.1	32.2	17.4	25.4
AHNAK2	0.0228	0.0434	0.0577	0.0259	0.0124	0.0252	0.0572	0.0459	0.0444	0.0325	0.0486	0.0367	0.0495	0.0386	0.0545	0.0486	0.0367	0.0133	0.0477	0.0478	0.0341	0.0306	0.0655	0.0208	0.048	0.0129	0.0283	0.0704	0.0468	0.0307	0.0393	0.0255	0.027	0.0221	0.0839	0.0539	0.0261	0.0374	0.0372	0.0179	0.011	0.0315	0.0227	0.0336	0.0647	0.0116	0.0661	0.0251	0.0309
AHR	3.25	2.08	3.68	2.88	2.59	3.17	3.33	4.27	3.05	7.3	2.59	5.09	2.23	2.61	3.7	3.56	4.4	4.4	2.38	3.85	4.09	5.15	5.69	4.3	3.21	6.11	3.96	5.11	6.5	4.31	4.07	2.47	2.87	1.22	2.26	3.61	5.97	5.62	2.65	6.31	4.55	6.87	4.2	4.45	4.82	5.43	4.83	3.96	2.34
AHRR	0.653	0.453	0.447	0.813	0.513	0.533	0.44	0.649	0.368	0.466	0.432	0.562	0.519	0.605	0.59	0.429	0.48	0.536	0.597	0.433	0.644	0.566	0.552	0.533	0.411	0.742	0.583	0.341	0.465	0.472	0.458	0.64	0.599	0.749	0.766	0.549	0.422	0.529	0.497	1.86	0.616	0.438	0.354	0.466	0.371	0.396	0.458	0.463	0.493
AHSA1	29.7	32.2	31.3	26.5	45.6	25.2	35.6	24.8	23.3	28.8	35	33.3	39.8	49.4	33.3	33.9	38.6	41.9	32	40.9	52.9	37.4	27.9	28.5	26.3	33.2	29.3	32.5	35.7	29.4	41	33.5	52.5	38.8	24.4	28.2	29.6	48.6	40.3	32.6	31.5	31.5	38	28.1	24.4	31.1	36.6	31.7	33.3
AHSA2	16.7	18.8	17.5	18.8	11.1	26	26	17.1	25.6	19.9	21.9	16.2	15.1	9.04	17.4	17.2	12	12.4	35.6	11.9	9.58	10.6	25.5	23.6	19.4	24.9	24.1	14	9.97	19.1	12.9	15.3	9.82	19.6	26.9	21.1	16.5	20.5	21.3	18.5	17.2	21.6	16.6	24.9	21.4	15	19	16.4	16.1
AHSG	0	0	0.00714	0.012	0	0.0122	0.014	0	0.0157	0.0097	0.0212	0	0	0.0112	0	0.00858	0	0	0	0	0.0124	0	0.0117	0.0142	0.0123	0	0.0132	0	0.00665	0.00992	0	0	0.015	0	0.0109	0	0.0225	0.0156	0	0	0	0.0103	0	0.00663	0	0	0.0135	0	0
AICDA	0.14	0.19	0.0925	0.495	0.208	0.241	0.15	0.271	0.274	0.0492	0.0557	0.0635	0.0464	0.00632	0.0409	0.0532	0.0469	0.136	0.0556	0.0891	0.154	0.353	0.0165	0.212	0.0587	0.376	0.572	0.072	0.0337	0.0782	0.365	0.174	0.118	0.222	0.299	0.146	0.355	0.0701	0.0571	0.417	0.145	0.5	0.341	0.145	0.135	0.142	0.171	0.0284	0.243
AIDA	0.347	0.657	0.221	0.195	0.193	0.339	0.337	0.192	0.246	0.223	0.226	0.253	0.23	0.17	0.271	0.287	0.229	0.117	0.181	0.264	0.0714	0.228	0.295	0.264	0.279	0.3	0.173	0.584	0.292	0.244	0.379	0.279	0.227	0.246	0.472	0.338	0.345	0.203	0.164	0.333	0.179	0.332	0.109	0.385	0.305	0.269	0.396	0.201	0.309
AIF1	122	98.8	104	101	100	124	79.9	97.5	97.3	122	84.9	125	120	215	83.6	68.4	169	234	92.1	77.5	223	122	79	109	83.3	177	152	59.5	106	52.1	64.7	90.2	244	97.7	66.2	84.2	86.6	115	89.4	101	59.2	65.3	72.3	108	78	84.9	57.5	96.6	96.6
AIF1L	0.103	0.15	0.0381	0.00536	0.0643	0.0163	0.028	0.0419	0.0384	0.0431	0.0252	0.0322	0.0305	0.0749	0.0323	0.0534	0.0185	0.107	0.011	0.0651	0.0662	0.0349	0.0104	0.0221	0.0409	0.0364	0.0587	0.0569	0.0769	0.0309	0.0297	0.0551	0.133	0.0269	0.261	0.0657	0.0977	0.0173	0.0369	0.0186	0.0763	0.0413	0.0743	0.0354	0.0495	0.0388	0.0811	0.0583	0.0639
AIFM1	5.23	4.49	5.71	3.39	5.1	3.26	4.91	3.83	3.02	4.66	4.99	4.71	5.83	6.25	4.27	4.77	5.52	5.62	4.64	6.94	8.34	5.96	4.01	3.65	3.76	3.6	3.7	5.79	5.45	5.15	7.34	5.03	7.88	4.68	3.59	4.19	4.8	6.4	5.56	4.64	5.21	5.38	6.4	5.22	3.7	5.7	6.6	4.38	5.38
AIFM2	1.37	1.29	1.12	0.921	0.793	0.935	1.91	1.4	1.26	1.18	2.2	1.49	1.79	1.38	1.4	1.88	0.967	0.783	2.18	1.83	1.24	1	1.41	1.1	1.31	0.923	0.793	1.17	1	1.81	1.79	1.93	1.55	1.22	1.12	1.71	1.43	1.72	1.51	0.844	1.08	1.72	1.91	1.36	0.957	1.4	1.9	1.33	1.98
AIFM3	1.85	1.36	3.12	1.18	1.93	1.06	2.66	0.697	1.3	2.37	2.04	2.6	3.13	3.47	2.4	1.09	2	1.6	2.34	1.74	3	2	2.34	1.51	1.32	1.34	1.03	0.763	1.25	1.87	1.9	1.06	2.3	0.998	0.878	1.86	2.59	2.59	1.17	1.71	1.91	2.46	2.98	2.14	2.12	1.61	1.69	0.546	1.8
AIG1	5.45	4.68	3.04	2.46	3.36	3.76	4.81	4.02	2.52	2.84	2.59	2.42	4.12	4.01	3.53	4.57	3.11	6.75	2.44	3.11	4.41	2.88	3.39	2.26	2.62	5.51	5.23	2.48	2.73	2.66	2.64	6.53	6.46	3.11	2.63	4.05	2.38	3.5	3.93	5.36	3.58	2.45	2.96	2.83	2.62	3.5	2.22	4.42	3.68
AIM1	13.2	15.7	12.3	11.9	17.4	12.7	10.4	12.2	10.6	11.7	8.92	11.9	10.9	11.2	12.2	10.1	13.4	15.9	11.3	14.2	10.9	16.7	10.6	15.3	13	12.2	14.5	13.5	12	12.4	12.5	8.31	12	12.9	13.8	11.5	9.3	12	12.9	22	21	15.2	13.6	10.4	15.4	12.5	15.6	11.9	9.92
AIM1L	0.278	0.635	0.266	0.408	0.742	0.326	0.229	0.421	0.235	0.242	0.322	0.21	0.333	0.249	0.248	0.389	0.265	0.382	0.73	0.293	0.387	0.357	0.223	0.367	0.236	0.233	0.364	0.153	0.215	0.36	0.311	0.349	0.332	0.558	0.182	0.227	0.247	0.324	0.553	0.307	0.338	0.24	0.301	0.282	0.39	0.25	0.243	0.269	0.242
AIM2	18.8	30.4	4.67	12.1	12.7	12.4	33.7	12.3	9.89	5.55	4.83	4.88	5.38	5.75	5.05	7.93	8.92	20.9	10.6	6.13	6.09	5.37	4.73	13.1	10.1	23.6	20	3.45	7.71	8.32	10.8	21.8	19.8	68	42.3	16.8	7.87	7.3	10.2	41.9	24.1	13.8	10.6	15.8	24	15.5	14.1	7.49	32.6
AIMP1	4.86	6.68	3.96	3.64	3.05	5.08	6.69	6.01	6.37	7.46	7.26	6.28	4.23	5.99	5.51	5.68	5.79	3.9	5.52	5.27	3.38	5.24	7.13	5.73	5.76	4.9	3.45	8.58	6.73	5.29	7.26	6.63	7.61	4.36	5.13	6.64	8.46	5.38	5.11	4.66	4.12	7.55	4.95	8.46	5.82	5.9	5.46	6.38	7.89
AIMP2	8.44	11.1	11.2	7.2	10.2	7.68	8.22	8.14	5.66	11	9.45	9.57	14.8	13.2	8.91	9.23	11.2	9.58	10.2	11.6	17.6	9.57	7.79	8.35	6.11	7.97	7.55	9.65	9.32	9.19	11.7	12.2	15.4	9.92	7.61	9.2	8.84	11.3	10.4	9.39	7.91	10.1	11.2	9.99	7.49	11.7	11.6	9.91	10.4
AIP	57.7	47.4	46	52.2	64.2	39	51.9	43.6	40.6	44.4	59.1	59.8	76.4	85.3	56.9	67.7	58.3	63.2	67.5	69.8	119	52.7	50	46	47.9	46.5	44.3	48.2	50.5	55.9	55.7	67.7	112	64	39.4	49	56.6	72.6	62.3	37.9	44.3	47.4	65.4	60.1	39.8	60	47.4	52.8	61.1
AIPL1	0	0	0.00378	0	0	0	0	0	0.00415	0	0	0	0	0.00595	0	0.00909	0.00551	0	0.00654	0	0.00657	0	0.0031	0	0.00325	0	0	0.00308	0	0	0	0	0.00792	0	0.0115	0.00489	0	0	0	0	0	0	0	0	0	0.0103	0	0	0.00423
AIRE	0.5	0.407	0.386	0.281	0.221	0.343	0.857	0.766	0.395	0.627	1.78	0.662	0.458	1.14	0.697	1.19	0.347	0.173	0.308	1.62	0.112	0.287	1.71	0.414	1.16	0.253	0.084	0.539	0.599	0.51	0.676	1.07	0.0872	0.217	0.472	0.778	0.725	0.437	1.04	0.315	0.267	1.06	0.981	0.519	0.413	0.231	0.44	0.658	1.76
AIRN	0.0179	0.0404	0.0334	0.00866	0.0173	0.0615	0.0126	0.0151	0.0536	0.014	0.0178	0.0174	0.0148	0	0.0326	0.0154	0.0225	0.0248	0.0178	0.00211	0.0178	0.0333	0.0401	0.0486	0.0155	0.0196	0.019	0.00836	0.012	0.0357	0.0103	0.0134	0.0161	0.0327	0.0469	0.0166	0.0122	0.014	0.0199	0.0413	0.0424	0.026	0.0025	0.00953	0.0646	0.0348	0.00971	0.0218	0.00862
AJAP1	0.0314	0.0178	0.0237	0.0114	0.0533	0	0.0166	0.0149	0.0223	0.0184	0.107	0.0611	0.0586	0.0639	0.043	0.204	0.128	0	0.0469	0.0917	0.0118	0.0237	0.0501	0.0169	0.198	0	0.025	0.0524	0.104	0.0376	0.00452	0	0.0142	0.00718	0	0.11	0.0107	0.491	0.0437	0.0198	0.0254	0.00735	0.0363	0.022	0.0609	0.00459	0.0128	0.0191	0.00379
AJUBA	0.148	0.248	0.128	0.12	0.0958	0.154	0.137	0.17	0.148	0.145	0.129	0.166	0.0682	0.22	0.123	0.253	0.141	0.0685	0.131	0.179	0.0781	0.085	0.212	0.0989	0.161	0.19	0.127	0.121	0.209	0.141	0.148	0.172	0.0843	0.0401	0.173	0.165	0.179	0.101	0.22	0.159	0.27	0.144	0.134	0.108	0.156	0.157	0.157	0.257	0.0635
AK1	16.3	21.7	5.6	7.31	8.53	7.43	13	8.84	8.37	7.58	10.4	9.49	16.6	10.5	9.24	11.8	8.79	6.81	19.3	11	10.5	5.8	10.5	10.5	9.87	6.79	6.57	8.34	6.19	11.2	7.32	11.7	14	9.21	6.65	7.42	10.8	12.4	11.5	4.18	5.66	7.45	6.63	9.28	9	10.4	7.19	11.6	11.6
AK2	5.49	7.52	6.54	4.49	5.78	5.56	6.37	6.47	5.29	7.38	6.68	6.28	6.97	8.45	6.6	6.77	7.18	6.53	5.78	7.92	7.19	6.36	6	6.19	5.94	5.01	5.44	8.52	7.07	5.88	7.59	6.68	8.15	5.34	5.31	6.78	7.1	7.62	5.96	5.74	4.93	6.77	6.87	7.39	5.61	7.22	6.41	7.48	7.2
AK3	2.2	2.22	2.44	2.43	1.93	2.79	3.49	3.53	3.13	2.58	3.13	3.28	2.56	2.77	3.02	3.48	2.89	1.79	3.28	3.28	1.72	2.6	3.18	2.76	2.9	2.75	2.18	3.86	3.36	3.36	3.22	2.82	1.98	2.46	2.22	4.14	3.47	2.41	3.04	2.54	1.86	3.66	2.93	3.62	2.26	1.99	2.65	3.21	3.71
AK4	0.0252	0.0693	0.0218	0.0262	0.0699	0.0186	0.032	0.0365	0.0341	0.0612	0.00308	0.0456	0.0359	0.0709	0.0138	0.0149	0.0521	0.0337	0.0323	0.0306	0.0729	0.0605	0.00766	0.017	0.0401	0.0119	0.0172	0.0228	0.0347	0.041	0.056	0.0189	0.0391	0.0494	0.0189	0.0261	0.0233	0.0322	0.0301	0.0432	0.0677	0.0539	0.0455	0.0274	0.0615	0.0358	0.0206	0.0549	0.0191
AK5	0.348	0.537	0.695	1.03	0.536	1.19	1.09	0.654	0.831	0.711	1.51	1.33	0.891	2.14	1.28	1.36	1.05	0.556	0.574	0.942	1.15	1.2	1.34	0.286	0.739	0.964	0.891	1.43	2.73	0.428	0.498	0.458	0.738	0.324	0.552	1.39	1.36	1.34	1.32	0.625	1.1	0.659	0.498	1.39	0.382	0.39	0.755	2.51	0.406
AK7	0.0295	0.0667	0.00424	0.00715	0.0191	0.0363	0.0291	0.0187	0.0279	0.0115	0.021	0.0144	0.0163	0.00667	0.0377	0.0051	0.0309	0.0409	0.0293	0.0104	0.0221	0.0169	0.00348	0.00845	0.0146	0.0162	0	0.0449	0.0197	0	0.017	0.0147	0.0178	0	0.0129	0	0.0167	0.0231	0.00548	0.0248	0.0382	0.00613	0.00827	0.0118	0.0254	0.023	0.012	0.042	0.00949
AK8	0.173	0.14	0.048	0.117	0.024	0.0822	0.293	0.282	0.0468	0.0507	0.0792	0.126	0.123	0.0587	0.169	0.25	0.0855	0.0514	0.138	0.293	0.167	0.0586	0.0701	0.0584	0.0596	0.132	0.0789	0.287	0.0794	0.111	0.0569	0.0278	0.168	0.0565	0.114	0.159	0.143	0.203	0.0965	0.0857	0.00801	0.0964	0.114	0.178	0.109	0.0434	0.227	0.0377	0.698
AKAP1	2.13	1.9	3.32	2.66	1.89	3.32	3.36	2.89	3.65	3.25	3.88	3.14	3.11	2.83	3.64	3.83	3.1	2.07	3.22	4.72	2.18	3.38	4.07	2.59	3.85	2.43	2.45	4.54	3.94	3.55	3.98	2.97	2.25	2.14	3.38	3.75	4.01	2.69	2.88	2.59	2.67	3.65	3.12	3.38	3	2.59	4.14	3.87	2.92
AKAP10	10.7	10	9.62	19.2	12.5	16.7	10.6	13.2	15.4	11.5	9.14	9.57	9.13	6.17	10.6	9.11	10.4	9.77	8.88	7.63	5.62	13.5	11.7	13	12.2	14.6	22.7	11.1	11.7	9.85	10.3	8.88	5.74	11.7	14.3	10.1	10.3	8.24	8.84	18.3	17.2	11.2	8.66	12.5	14	12	11.6	12.2	8.94
AKAP11	1.79	1.65	3.01	2.64	1.34	2.47	3.83	3.04	3.41	3.22	2.8	2.85	1.69	1.35	3.17	3.18	2	1.25	2.66	2.6	1.21	2.52	4.19	3.22	3.42	2.21	2.28	5.82	3.88	3.92	3.43	2.42	1.7	2.18	3.68	3.73	4.15	1.78	1.71	2.98	2.83	4.37	2.55	3.34	4.02	2.44	3.61	2.37	2.71
AKAP12	0.4	0.0369	0.463	0.0905	0.477	0.0459	0.135	0.345	0.372	0.559	0.0468	0.0461	0.206	0.44	0.321	0.0676	1.19	0.117	0.148	0.348	0.257	0.154	0.563	0.137	0.523	0.402	0.194	0.0187	0.36	0.0675	0.0733	0.142	0.107	0.268	0.13	0.26	0.0282	0.0877	0.256	0.357	0.372	0.257	0.458	0.019	0.639	0.0173	0.145	0.231	0.0615
AKAP13	21.8	15.5	22.8	26.7	37.3	19.9	20.6	24.6	21.1	17.2	16.1	15.7	19.1	14.3	16.1	16.9	19.7	19	19.4	18	20.3	29.7	15.1	24.5	17.3	27.8	33.1	16.4	19.1	23.2	18.6	12.6	14.4	32.8	28.9	15.3	14.7	17.5	15.6	41.7	29.1	19.6	20	14.7	30.6	19.5	23.4	12.4	17.5
AKAP14	0.114	0.0322	0.0369	0.0415	0.0276	0	0.0362	0.018	0.027	0.0334	0.0243	0.0693	0.0236	0.0193	0.0624	0.0739	0.0537	0.0593	0	0.0504	0.0427	0.0613	0.0706	0.0612	0.0211	0.0938	0.0455	0.05	0.0229	0	0.0656	0.064	0.0772	0	0.0374	0.0318	0.0388	0.0402	0.0476	0.0718	0.0553	0.0533	0.0838	0.0228	0.0147	0.0833	0.0232	0.0868	0.0137
AKAP17A	0.469	0.494	0.599	0.832	0.763	0.996	0.39	0.633	0.891	0.67	0.634	0.444	0.401	0.415	0.618	0.552	0.454	0.826	0.705	0.593	0.262	0.605	0.498	0.76	0.771	0.771	1.06	0.513	0.456	0.571	0.471	0.659	0.129	0.864	0.781	0.669	0.489	0.63	0.677	0.821	0.735	0.532	0.648	0.407	0.509	0.585	0.577	0.653	0.532
AKAP2	2.77	3.63	2.68	2.02	1.48	1.77	3.77	2.41	2.06	1.22	2.37	2.34	2.45	0.772	2.3	2.92	1.55	1.42	1.65	3.21	1.88	1.66	3.17	2.41	2.14	2.38	1.32	4.32	2.53	4.16	6.82	4.5	4.3	2.73	5.63	3.48	4.65	1.56	2.49	3.3	3.46	7.62	4.03	4.49	3.2	4.5	6.67	1.37	7.89
AKAP3	0.19	0.0975	0.16	0.113	0.0669	0.159	0.175	0.0491	0.167	0.096	0.162	0.113	0.0858	0.193	0.17	0.103	0.174	0.0628	0.045	0.11	0.213	0.182	0.29	0.0741	0.112	0.0781	0.144	0.167	0.138	0.109	0.223	0.0968	0.0935	0.103	0.0905	0.154	0.158	0.178	0.216	0.0924	0.123	0.105	0.0943	0.141	0.156	0.0908	0.201	0.221	0.162
AKAP4	0	0	0	0	0	0	0.00367	0	0	0	0	0	0	0	0	0	0	0	0	0	0	0	0	0	0	0	0	0	0	0	0	0	0	0	0	0	0	0	0	0	0	0	0	0	0	0	0	0	0
AKAP5	0.309	0.186	0.258	0.213	0.183	0.311	0.708	0.622	0.384	0.273	0.725	0.34	0.31	0.256	0.37	0.495	0.207	0.209	0.159	0.396	0.0692	0.277	0.471	0.271	0.333	0.139	0.327	0.512	0.535	0.419	0.337	0.43	0.145	0.191	0.242	0.385	0.754	0.253	0.251	0.261	0.151	0.409	0.262	0.308	0.504	0.275	0.273	0.372	0.562
AKAP6	0.0577	0.0255	0.0357	0.0474	0.0146	0.087	0.0318	0.0476	0.118	0.0411	0.0685	0.0952	0.0644	0.0578	0.055	0.105	0.041	0.0443	0.0262	0.105	0.0188	0.101	0.143	0.0248	0.0929	0.0557	0.022	0.0854	0.0695	0.0496	0.0159	0.0113	0.034	0.0275	0.0411	0.0937	0.0614	0.0389	0.0545	0.03	0.0292	0.0242	0.02	0.0321	0.057	0.0044	0.0552	0.0306	0.0339
AKAP7	1.23	1.22	0.844	1.09	0.628	1.19	1.38	1.45	1.41	1.52	1.38	1.33	1.01	1.05	1.32	1.03	0.856	0.751	1.33	1.15	0.761	0.959	2	1.38	1.5	0.663	0.942	3.04	1.94	1.5	1.48	1.66	1.46	0.874	1.47	1.81	2	0.88	0.839	0.972	1.25	1.28	0.851	1.92	1.42	1.61	1.11	1.69	1.34
AKAP8	8.18	7.57	9.71	10.9	9.28	10.4	9.63	10.2	9.79	9.92	10.2	9.71	9.34	8.22	9.89	9.84	8.91	8.85	12.3	11.3	6.62	9.2	9.77	10.4	10.9	10.2	10	9.11	9.69	10.5	9.82	8.36	7.15	8.21	8.98	10.4	9.6	9.2	9.57	9.18	8.98	9.07	9.88	10.2	9.75	8.5	9.49	10	9.56
AKAP8L	28.7	31	32.5	30.3	46.5	25.8	21.9	24.4	22.9	24.1	24.6	24.2	32	33.7	25.2	25.2	25.8	46.6	33.7	30.2	34.8	26.7	18.4	24.8	22.1	29.3	32.9	18.9	20	26.2	25	20.3	31.5	29.9	19.7	23.4	18.2	34.7	30.5	25.6	29.1	18.5	29.7	20.2	20.8	26.7	23	26.5	23.3
AKAP9	2.34	2.25	2.82	2.39	3.11	2.56	2.86	2.89	3.12	2.85	2.68	2.13	2.12	1.68	2.52	2.24	2.51	2.13	2.31	2.47	1.31	2.61	2.66	2.62	2.6	2.79	2.78	3.38	3.47	3.6	2.88	1.83	1.65	2.52	3.47	3.09	2.56	1.93	2.53	2.95	3.35	2.98	2.55	2.5	3.62	2.37	2.93	2.48	2.49
AKD1	0.438	0.511	0.363	0.637	0.254	0.616	0.627	0.548	0.745	0.447	0.473	0.431	0.243	0.229	0.478	0.44	0.518	0.341	0.396	0.366	0.245	0.515	0.464	0.474	0.484	0.5	0.707	0.644	0.551	0.446	0.452	0.39	0.308	0.536	0.696	0.496	0.529	0.379	0.434	0.524	0.585	0.577	0.329	0.553	0.576	0.415	0.526	0.439	0.499
AKIP1	2.23	1.42	2.09	1.88	2.65	1.82	2.1	2.27	2.22	2.27	2.15	2.96	2.93	2.36	1.93	2.72	2.81	2.47	2.98	2.6	3.44	1.9	2.53	2.17	1.92	1.55	1.38	2.31	2.82	2.32	2.98	2.82	3.52	2.22	1.85	2.86	3.09	2.37	2.08	1.68	1.85	2.16	4.45	2.67	2.04	3.24	3.01	2.77	3.12
AKIRIN1	19.3	19.3	16.1	29.3	27	25	20.1	23.3	23.1	20.2	16.5	16.8	14.4	12.6	19.8	19.6	21.6	20.7	14	15	10.9	20.7	19.7	20.6	19.9	27	39.3	20.4	20.1	16.6	15.4	16.7	13.3	23.2	23.5	19.4	16.9	17	18.3	32.1	31.5	18.5	15.8	17.2	21.1	15.8	16.1	21.8	16.7
AKIRIN2	38.2	35.8	30.9	49.7	58	31.6	21.5	30.5	24	22.1	15.7	23.9	24.3	24.3	23	21.2	29	43.8	24.5	19.5	33.7	35.3	20.1	30.7	20.5	37.6	50.7	13.5	20.5	24.5	21.7	23.7	34.4	55.5	29.5	26.4	16.2	32.9	30.5	60.9	55.1	23.5	25.8	21.8	28.9	25.8	25.2	26.8	25.2
AKIRIN2-AS1	4.47	6.61	4.72	9.35	3.43	7.78	5.46	7.99	13.6	6.71	4.44	4.16	2.67	1.24	4.37	3.52	4.21	2.34	4.27	2.69	1.66	5.95	6.4	9.93	5.04	5.3	13.6	6.41	4.44	5.33	3.56	5.22	1.24	6.59	10.2	5.14	7.09	2.48	3.33	10.9	7.43	8.46	3.52	7.61	7.38	5.22	5.45	3.82	4.21
AKNA	102	82.8	85.2	113	145	97.9	60.8	79.6	69.2	63.4	80.1	84.1	87.2	84.1	82.1	77.3	83.2	121	91	96.3	81.9	104	67.4	94.5	79.6	97.5	121	48	75.4	84	75.9	74.6	79.7	107	81.7	59.9	62.7	80.9	82.2	126	133	52.2	82.2	53.4	80.3	76.2	75.8	73.9	67.2
AKNAD1	0.0241	0.0091	0.00347	0.0234	0.0234	0	0.00681	0.0254	0.0114	0.0236	0	0	0.00667	0.00546	0.00441	0	0.0101	0	0	0	0.00602	0	0.0114	0.00691	0.00894	0	0.0128	0.00847	0.00969	0	0.0139	0.00602	0	0	0.00527	0	0.00821	0.0151	0	0.0101	0.0156	0.00251	0.00338	0	0.00831	0.00941	0.00328	0.0098	0.00388
AKR1A1	24.1	24.4	27.6	18.3	23.5	18.8	27.6	21.5	18.2	30.7	28.2	27.4	39	47.7	25.8	24.6	28.5	31.7	32.2	31.1	51.9	24.7	26.2	22	19.6	21.2	16.7	29.7	28.9	22.1	27.2	33.3	49.1	23.6	17.1	27.4	28.2	40.8	25.7	17.3	19.1	29.6	32.1	29.8	18.5	33.8	27.2	28.6	36.3
AKR1B1	14.8	11.7	17.7	12.9	17	11.9	15.8	17.1	11.4	13.8	19.3	19.3	26.1	29.1	16.3	18.5	20.1	19.3	21.8	21.4	27.6	16.4	16.9	14.1	13.8	14.3	9.45	22.4	17.9	18.3	23.9	20.4	18.5	15	9.3	16.3	16.2	20.9	19.7	9.73	11.5	13.7	18.4	15.6	12.4	14.8	17.4	17.8	20.3
AKR1B10	0.0163	0.0185	0	0	0.0158	0.0241	0	0	0	0	0	0.00794	0.0271	0	0	0.0169	0.0103	0	0	0	0	0.0141	0	0	0	0	0	0	0	0	0.00939	0.0244	0	0	0.0321	0	0	0	0.00909	0	0	0	0	0	0	0	0	0	0
AKR1B15	0.016	0	0	0	0	0	0	0	0	0	0	0	0	0.0109	0	0	0	0	0	0.00567	0.024	0	0	0	0	0	0	0	0	0.00961	0	0	0	0	0	0	0.00545	0.00753	0	0.0101	0	0	0.00674	0	0.0166	0	0	0	0.0155
AKR1C1	0.0378	0.128	0.0407	0	0	0.0836	0.032	0.0956	0.00894	0.0775	0.0484	0.046	0.0157	0.0384	0.0207	0.0685	0	0.138	0.0704	0.0535	0.113	0.0407	0.0334	0.0405	0.056	0.0466	0.121	0.0265	0.0455	0.0566	0.0109	0.0283	0.0683	0	0.0248	0.0105	0.0578	0.124	0.137	0.143	0.0734	0.0236	0.0238	0.0453	0.00976	0.0221	0.0539	0.046	0.0547
AKR1C2	0.0122	0.0138	0.0315	0	0	0.0539	0	0	0	0	0	0.00592	0	0.00826	0	0.00631	0	0	0	0.00431	0.0456	0	0	0	0.00451	0	0	0	0.00489	0.0146	0	0.0091	0	0	0	0.0543	0.0331	0.00572	0.0339	0.0307	0.0551	0.00759	0	0.00487	0	0	0	0.0148	0.00587
AKR1C3	1.99	2.48	0.698	1.68	0.919	1.01	1.96	2.05	0.984	1.43	3.01	1.37	2.1	3.72	0.959	0.996	1.01	1.42	1.28	0.777	2.12	1.87	2.39	0.723	0.873	1.49	2.64	1.98	1.91	1.62	1.25	1.52	2.16	1.67	1.17	2.35	1.97	1.42	1.21	1.69	0.443	0.874	0.78	4.02	3.61	0.515	1.41	0.874	2.97
AKR1C4	0.153	0.0247	0.0566	0.0477	0	0.0161	0.0925	0	0.0207	0.0384	0.14	0.0957	0.109	0.0445	0.0239	0.034	0.124	0.0454	0.0652	0.0155	0.0164	0.0564	0.0774	0.0751	0.0324	0.018	0.0349	0.023	0.0439	0.0524	0.0377	0.0981	0.0197	0.0799	0.115	0.0975	0.0297	0.0616	0.073	0.0689	0.127	0.0204	0.0551	0.0874	0.136	0.0511	0.0624	0.0666	0.0422
AKR1CL1	0.0857	0.0831	0.0317	0.0534	0	0.0271	0.0415	0	0.0232	0.0144	0.068	0.0417	0.0101	0.0166	0.0604	0.0381	0.0154	0.0127	0.0457	0.026	0.0367	0.0264	0.052	0.0315	0.0545	0.0101	0.0195	0.0258	0.0295	0.044	0.0493	0.0824	0.0443	0.0336	0.0321	0.041	0.0583	0.0403	0.0682	0.0926	0.0793	0.0305	0.036	0.0882	0.114	0.0501	0.04	0.0224	0.0473
AKR1D1	0	0	0	0	0	0	0.00407	0	0	0	0	0	0	0	0	0	0	0.01	0	0	0	0	0	0	0	0	0	0.00337	0	0	0	0	0	0	0	0	0	0	0.0107	0	0	0	0	0	0	0	0	0	0
AKR1E2	0.437	0.384	0.181	0.212	0.0628	0.334	0.281	0.154	0.176	0.341	0.352	0.197	0.121	0.274	0.239	0.26	0.0915	0.0673	0.109	0.246	0.206	0.32	0.344	0.0347	0.144	0.28	0.219	0.261	0.273	0.194	0.335	0.436	0.249	0.0592	0.276	0.343	0.193	0.296	0.108	0.204	0.251	0.0958	0.211	0.265	0.0334	0.322	0.185	0.217	0.109
AKR7A2	8.61	5.02	9.04	6.51	7.53	4.84	6.9	5.27	5.32	7.94	8.63	9.3	12.4	12.3	8.12	10.6	9.25	9.51	11.9	10.6	17.4	8.64	8.26	5.4	6.44	6.85	5.22	7.49	8.44	7.93	5.63	7.9	11.5	6.98	4.58	6.99	8.47	11.4	8.14	5.48	4.93	5.81	10.2	7.8	4.96	10.2	5.03	7.96	7.55
AKR7A2P1	0	0.0222	0.017	0.0286	0	0.0145	0.0416	0.0124	0	0.0115	0.0504	0.0383	0	0.0133	0.0323	0.0102	0.0124	0.0205	0.0293	0.00696	0	0	0.0279	0.00845	0.0292	0.0162	0.0157	0.0345	0.0237	0.0354	0.0566	0.0294	0	0	0.0258	0.022	0.0268	0	0	0.0124	0	0.0368	0	0.0551	0.0203	0.046	0	0.012	0.0475
AKR7A3	0.063	0.0237	0.226	0.168	0.0204	0.031	0.071	0.119	0.139	0.0738	0.161	0.143	0.244	0.157	0.103	0.141	0.132	0.0655	0.297	0.156	0.22	0.136	0.141	0.0631	0.101	0	0.134	0.133	0.118	0.138	0.181	0.157	0.114	0.154	0.0413	0.316	0.15	0.187	0.292	0.106	0.122	0.19	0.115	0.176	0.0868	0.0491	0.154	0.166	0.122
AKR7L	0.045	0.0127	0.0243	0.0655	0.0437	0.0249	0.0476	0.0285	0.0426	0.066	0.0865	0.0438	0.0373	0.0382	0.0432	0.0467	0.0637	0.0351	0.134	0.0797	0.059	0.0581	0.0439	0.0677	0.0626	0.0463	0.0449	0.0553	0.0768	0.0675	0.0842	0.0421	0.0305	0.0617	0.0443	0.0502	0.0345	0.074	0.0815	0.0426	0.0219	0.0702	0.0899	0.036	0.064	0.0658	0.023	0.0892	0.0543
AKT1	64.8	50	61	89.9	102	59.5	34.7	64.7	52.8	45.9	46.6	63.3	67.4	56.2	55.9	51.5	73	68.8	61.6	48.7	78.4	67.6	46.9	55.8	59.7	72.2	93.2	30.1	45.4	47.6	45.5	50.4	51.9	72.8	44.7	36.9	31.2	67.7	66.9	62.4	59.3	34.6	49.3	37.8	51.2	44.6	37.5	46.6	27.7
AKT1S1	11.8	11.4	8.34	9.55	9.97	7.98	5.45	5.86	5.59	7.2	7.36	8.28	14.1	13.8	8.98	8.56	9.77	9.78	10.7	7.28	11.9	6.31	5.85	5.47	5.84	7.55	6.71	3.94	5.77	6.66	5.38	9.31	9.93	9.47	4.23	5.45	5.05	7.8	8.36	4.97	5.39	4.01	6.88	5.14	5.19	6.65	5.17	7.98	6.22
AKT2	26.8	25.5	27.6	27.9	31.6	22.7	20.8	24.5	19.6	18.7	23.8	24.2	28.8	30	25.5	25.8	25.4	32.5	30	28.5	27.9	24.2	21.5	22.1	24	29	27.1	17	21.4	22.4	23.5	23.8	23.1	29.2	22	20.3	19.3	26.6	26.1	22.3	22.4	19.2	26.5	20.6	20.7	22.5	22.2	26.2	21.5
AKT3	2.04	1.41	1.63	1.96	1.34	1.78	3.21	2.59	2.71	2.77	3.22	2.76	2.26	2.15	2.41	3.43	2.38	1.36	3.3	3.16	1.38	2.25	3.85	2.5	2.86	1.91	1.6	4.17	3.16	3.31	3.07	1.62	1.42	0.908	1.87	2.66	3.03	1.99	2.02	2.15	1.85	2.63	2.33	2.5	3.24	1.38	2.53	2.36	2.24
AKTIP	6.85	8.6	7.84	7.35	11.6	8.89	8.19	10.7	9.07	8.56	8.13	8.85	7.47	5.9	9.63	8.17	8.91	7.45	5.58	7.34	7.72	8.2	8.09	10.3	8.05	8.91	14.1	10.8	9.03	6.33	7.11	6.26	7.41	7.84	7.53	7.38	7.1	7.26	8.56	10.8	8.82	7.14	6.01	8.16	7.95	5.92	6.24	10	5.78
ALAD	11.4	13.6	10.1	9.04	11.7	8.5	9.29	7.45	8.24	10.9	9.77	10.2	10	10.7	9.83	9.89	10.5	11.3	9.85	10.8	9.51	11.4	9.34	8.58	8.29	8.65	8.33	9.45	11.1	10.8	10.2	8.09	7.61	8.88	8.54	7.97	10.2	11.2	9.5	8.74	8.71	8.34	11.4	9.69	9.08	10	9.39	9.83	8.14
ALAS1	18.5	20.3	19	21.2	34	18.3	12.1	13.3	14.4	14.2	9.57	13.1	17.9	18.4	13	13.3	18.1	23.9	10.2	15.2	27.6	23.4	9.88	14.3	13.6	16.2	19.4	11.9	11.7	11.7	16	13.9	19.1	22.2	17.8	10.6	11.6	20.2	16.8	25.9	26.4	13.4	16.3	11.5	14.7	16	18.3	16.1	13.9
ALAS2	2790	5420	54	230	359	1220	106	54.6	75.2	353	413	93.3	1880	322	350	129	293	160	814	27.2	147	66.2	93.7	46.4	219	152	119	373	74.3	213	275	1330	808	384	300	294	69.8	48.6	344	25.4	117	7.38	27.5	49.7	546	686	140	225	235
ALB	0.0348	0.131	0.07	0.0169	0	0.00856	0.137	0.0367	0.0329	0.0204	0.0644	0.00564	0.00961	0.0236	0.0762	0.0721	0.00729	0.0362	0.0173	0.0451	0.00868	0.015	0.0698	0.0199	0.0258	0.0191	0.0277	0.0529	0.0977	0.0486	0.1	0.026	0.0314	0.0106	0.0684	0.0517	0.13	0.0653	0.0387	0.0292	0.143	0.0831	0.0828	0.0325	0.024	0.0271	0.0284	0.0777	0.0503
ALCAM	1.78	2.28	2.11	4.99	2.75	2.63	2.09	2.56	2.74	3.69	1.12	1.78	1.79	1.42	2.12	1.36	2.34	2.62	2	1.66	0.645	4	2	2.05	3.12	2.55	3.76	2.16	1.99	1.57	1.79	1.4	1.21	2.69	2.85	1.83	1.48	1.38	1.33	3	2.27	2.74	1.19	1.4	3.08	1.69	2.11	1.15	1.64
ALDH16A1	11.9	9.08	14.2	10.2	12.6	7.59	10.1	9.41	8.87	11.7	13.2	13.7	14.8	23.7	14.5	15.4	9.69	9.5	17.5	16.8	16.7	9.9	12.3	7.55	12.6	9.63	6.79	8.44	10.4	13.3	12.3	9.56	15.5	10.2	7.17	12	10	14.1	10.7	6.08	8.3	10.1	15.8	10.6	8.88	12	11.4	12.5	12.6
ALDH18A1	3.5	2.63	3.9	2.36	3.29	1.97	3.97	2.8	2.34	2.77	4.01	3.57	3.8	4.11	3.71	3.74	3.56	2.48	3.26	5.48	3.54	3.36	3.53	2.87	3.31	2.65	1.94	4.84	4.35	5.08	5.63	3.56	3.89	3.25	3.07	3.31	3.84	3.57	3.85	2.79	3.41	4.29	4.76	3.38	2.99	3.18	5.44	3.31	4.89
ALDH1A1	5.99	3.26	15	5.01	10.7	6.18	9.72	7.21	5.55	27.5	11.4	9.59	11.4	16.7	10.5	6.34	14.8	9.43	8.36	10.5	33.6	20.7	5.7	7.62	3.8	5.99	7.58	9.26	20.9	5.73	13.3	4.28	7.96	6.45	3.68	5.97	10.9	19.4	11.4	7.29	7.22	6.79	9.65	7.92	5.33	10.2	5.35	8.47	17.9
ALDH1A2	0.165	0.202	0.0473	0.13	0.146	0.142	0.058	0.0564	0.114	0.108	0.0381	0.0334	0.0227	0.102	0.0639	0.0426	0.0991	0.307	0.0869	0.0606	0.113	0.121	0.0777	0.118	0.0788	0.248	0.306	0.0265	0.0963	0.0657	0.0986	0.0615	0.173	0.144	0.427	0.0459	0.049	0.0805	0.0802	0.229	0.288	0.126	0.107	0.0933	0.106	0.16	0.106	0.121	0.142
ALDH1A3	0.0298	0.0337	0.0354	0.0542	0.0289	0.0825	0.0378	0.0283	0.0952	0.0742	0.0286	0.0326	0.0432	0.0152	0.0286	0.0463	0.0281	0.0465	0.05	0.0158	0.00558	0.0385	0.0369	0.048	0.0469	0.0123	0.0594	0.0602	0.0628	0.0134	0.0171	0.039	0.00673	0.0136	0.044	0.0499	0.0709	0.0245	0.0083	0.0235	0.0434	0.0465	0.0344	0.0238	0.0539	0.0349	0.0881	0.0636	0.0647
ALDH1B1	0.749	0.594	1.1	0.889	0.81	0.845	0.9	0.784	1.03	0.787	1.22	1.12	1.42	1.35	0.92	1.26	1.24	0.77	1.53	1.7	1.05	1.27	1.04	0.898	1.18	0.921	0.549	1.21	1.35	1.26	1.09	1.19	0.786	0.803	0.649	0.817	0.931	0.987	1.21	0.993	0.741	1.14	1.1	0.792	0.859	1.41	1.36	1.01	0.831
ALDH1L1	0	0	0.0036	0.00606	0	0	0	0.00527	0.00395	0.00488	0.00356	0	0	0.00565	0.00913	0.00432	0	0	0.00622	0.0059	0.00624	0.00718	0	0	0.00927	0.0137	0	0.0117	0	0.00499	0.00959	0	0	0	0.00546	0.0186	0.00283	0	0	0.00525	0	0	0.021	0	0	0	0.0034	0.0102	0
ALDH1L1-AS1	0	0	0.0257	0	0	0	0	0	0	0.0349	0.0255	0	0	0	0	0.0309	0	0	0	0	0	0	0	0	0.0221	0	0	0.0209	0	0	0.0686	0	0	0	0	0	0.0405	0	0.0332	0.0376	0.0386	0	0.0501	0	0	0.0349	0.0729	0	0.0288
ALDH1L1-AS2	0	0	0	0	0	0	0	0	0.00531	0	0	0	0	0	0	0	0	0	0	0	0	0	0	0	0	0	0	0	0	0	0	0	0	0	0	0	0	0	0	0	0	0	0	0	0	0	0	0	0
ALDH1L2	0.0484	0.086	0.0984	0.0377	0.0469	0.0306	0.0365	0.00656	0.0589	0.0324	0.0162	0.0185	0.02	0.0211	0.0265	0.0322	0.0348	0.0755	0.018	0.0452	0.0181	0.0342	0.0416	0.0193	0.0154	0.037	0.0165	0.04	0.0374	0.0745	0.0914	0.106	0.0718	0.0411	0.0408	0.0173	0.02	0.0276	0.025	0.109	0.132	0.126	0.0653	0.0567	0.0482	0.0566	0.134	0.0232	0.183
ALDH2	40.2	19.6	53	36.8	60.1	36.7	13.8	20.8	17.1	69.9	24.4	28.9	35.7	63.7	22.7	23.4	52	126	22.7	38.9	98.2	43.3	23.8	29.7	15.7	64.9	46	24.2	40.1	32.3	35.1	26.6	49.4	22.5	17.7	17.9	46.6	48.3	28.9	34.1	27.3	30.2	45.3	32.9	20.7	41.4	34.9	22.6	37.2
ALDH3A1	0.0115	0.0131	0.0299	0	0	0	0.00488	0.0073	0.0164	0.0135	0	0.0337	0.00957	0	0.0126	0	0.0145	0	0.00861	0.0122	0	0.00994	0.00817	0	0.0257	0	0.0092	0.00405	0.00463	0	0.0133	0	0	0	0	0	0.0118	0.0108	0.0129	0	0	0	0.0097	0	0.00596	0.00675	0	0	0
ALDH3A2	4.98	4.39	6.54	4.2	4.93	4.54	6.6	5.52	4.87	6.62	6.24	5.64	6.49	6.63	5.69	5.69	5.97	6.11	5.44	6.85	5.59	6.34	6.15	4.55	5.35	4.87	4.44	7.02	8.08	5.87	6.44	5.95	5.9	3.44	3.86	5.54	6.86	6.55	5.08	5.54	4.67	5.88	6.12	6.09	5.26	6.06	6.49	6.24	5.23
ALDH3B1	22.8	24.9	22	21	30	15	9.31	14.4	10.9	18.7	12.4	15.9	20.6	23.7	12.1	13.3	19.3	43.6	16.9	15.2	29.9	23.4	10.5	15.2	9.85	14.4	27.2	7.8	16.7	13.9	11.2	13.5	25.4	27.9	12.4	11.9	13.3	19.9	14.5	25.6	18.8	14.6	22.8	14.4	12.1	25.3	15.9	15.1	11.6
ALDH3B2	0.0872	0.0657	0.0334	0.0634	0.15	0.0572	0.041	0.0919	0.0321	0.0341	0.0496	0.0754	0.0562	0.0526	0.0318	0.0603	0.0913	0.0806	0.0433	0.0788	0.029	0.117	0.072	0.0624	0.061	0.0478	0.0618	0.0136	0.0428	0.0406	0.0613	0.058	0.0788	0.062	0.0381	0.108	0.0659	0.487	0.0378	0.0305	0.069	0.0453	0.0651	0.0465	0.0601	0.0623	0.083	0.059	0.0467
ALDH4A1	0.946	1.63	1.67	1.45	1.76	1.29	1.26	1.05	1.25	1.64	1.21	1.28	1.47	2	1.09	1.15	1.3	1.71	1.94	1.26	2.37	1.88	1	1.45	1.25	1.4	0.957	1.16	1.27	1.25	1.63	1.51	1.64	1.2	1.39	1.19	1.49	1.57	1.36	1.32	1.2	1.53	1.78	1.24	1.22	1.82	1.76	1.78	1.3
ALDH5A1	1.63	4.92	1.51	1.41	1.45	2.03	1.75	1.11	1.63	1.64	1.71	1.56	2.43	1.65	1.9	1.85	1.68	1.16	1.26	2.07	1.09	1.36	1.98	1.07	1.95	1.75	1.18	2.69	2.46	1.92	2.32	1.4	1.35	1.19	2.3	1.92	1.38	1.27	1.68	1.46	1.75	1.51	1.26	1.68	1.68	1.53	2.1	1.78	1.36
ALDH6A1	1.31	1.77	1.86	1.29	1.38	1.44	1.92	1.2	1.26	1.34	1.43	1.52	1.38	1.39	1.63	1.7	1.37	1.51	1.01	2.07	1.26	1.71	1.49	0.989	1.81	1.37	1.13	1.76	1.98	1.54	1.81	1.18	0.97	0.807	1.06	1.38	1.61	1.66	1.33	1.43	1.24	1.31	1.6	1.16	1.57	1.26	1.49	1.32	1.6
ALDH7A1	0.0211	0.0298	0.0501	0.0499	0.087	0.0467	0.0558	0.0534	0.0625	0.034	0.0969	0.0385	0.0481	0.107	0.0983	0.12	0.0597	0.0549	0.0276	0.0485	0.0356	0.0977	0.14	0.034	0.0861	0.0869	0.0379	0.0797	0.104	0.0474	0.143	0.0987	0.0524	0.0531	0.0173	0.0707	0.0592	0.052	0.0265	0.0366	0.0581	0.0263	0.0688	0.0464	0.0191	0.0617	0.131	0.0257	0.0484
ALDH8A1	0.417	0.484	0.606	0.348	0.168	0.586	0.25	0.631	0.241	0.406	0.574	0.377	0.456	0.186	0.268	0.459	0.448	0.169	0.858	0.382	0.351	0.158	0.451	0.433	0.245	0.528	0.568	0.307	0.376	0.189	0.89	0.495	0.313	0.559	0.748	0.562	0.519	0.789	0.391	0.334	0.481	0.74	0.36	0.782	0.158	0.375	0.378	0.366	0.585
ALDH9A1	19.2	12.4	26.2	24	40.8	20.2	15.6	18.3	16.1	16.2	15.9	21.2	21.8	25.1	17.8	16.7	30.4	31.6	11.5	23.1	26	31.4	16.1	16.5	16.1	31.2	33.7	18	21.5	17.4	18.8	14.4	19.3	26.1	16.4	15.2	13.6	22.1	18.4	30.7	25.6	13	24.6	14.9	15.6	18.9	23.2	16.2	15.2
ALDOA	295	223	291	233	456	200	130	190	133	219	144	226	286	389	199	193	284	633	178	254	524	282	131	173	118	241	327	117	156	151	194	168	428	317	135	118	134	311	268	273	234	142	252	144	132	246	183	143	145
ALDOB	0.129	0.0364	0.0602	0.0469	0.0104	0.198	0.0772	0.129	0.102	0.0377	0.0275	0.0313	0.0089	0.00728	0.0471	0.0612	0.081	0.0447	0.024	0.095	0.0241	0.0555	0.0532	0.0784	0.0517	0.053	0.0428	0.0754	0.0646	0.0322	0.0247	0.0241	0.0097	0.0491	0.0774	0.024	0.113	0.0857	0.0837	0.149	0.0208	0.0971	0.0135	0.0601	0.0222	0.00628	0.0657	0.0458	0.0155
ALDOC	11.2	3.69	14.9	8.38	10.1	7.83	7.26	5.86	6.55	6.85	7.93	10.5	13	15.1	8.59	10.9	11.1	17.7	6.54	13.5	14.9	12.7	6.96	5.7	8.1	7.66	10.5	8.95	9.47	6.5	8.98	5.96	13	7.49	5.47	5.84	5.84	13.5	11.1	7.64	6.65	5.06	9.93	5.35	3.83	5.29	5.94	7.17	5.49
ALG1	2.02	1.75	2.29	1.4	2.24	1.19	1.93	1.63	1.49	1.88	2.36	2.02	2.3	2.67	1.9	2.2	1.85	1.92	2.22	2.63	2.58	1.98	1.9	1.65	1.65	1.49	1.21	2.09	2.01	2.44	2.35	2.31	2.94	1.77	1.34	2.06	2.14	2.48	1.92	1.56	1.67	2.17	2.69	2.15	1.61	2.58	2.45	1.95	2.94
ALG10	0.0916	0.32	0.165	0.164	0.194	0.197	0.321	0.221	0.308	0.278	0.231	0.186	0.0966	0.136	0.26	0.155	0.12	0.191	0.199	0.153	0.162	0.186	0.33	0.3	0.265	0.158	0.153	0.398	0.241	0.309	0.331	0.262	0.158	0.152	0.344	0.297	0.453	0.113	0.255	0.289	0.275	0.465	0.21	0.313	0.327	0.355	0.353	0.183	0.209
ALG10B	0.194	0.272	0.254	0.365	0.12	0.477	0.485	0.473	0.584	0.468	0.318	0.269	0.176	0.0894	0.305	0.323	0.18	0.113	0.318	0.22	0.0542	0.292	0.703	0.414	0.549	0.247	0.307	0.794	0.358	0.426	0.308	0.348	0.154	0.177	0.626	0.467	0.762	0.131	0.118	0.298	0.206	0.596	0.155	0.549	0.404	0.399	0.37	0.284	0.328
ALG11	2	1.98	2.06	2.02	1.18	2.31	2.27	1.64	2.72	2.2	1.77	1.62	1.24	1.05	1.97	2.19	1.38	1.05	1.59	1.8	0.524	1.86	2.4	1.86	2.37	1.55	2.01	3.57	2.67	2.44	2.77	2.19	1.06	1.88	3.26	2.5	3.17	1.18	1.28	2.95	2.97	3.36	1.81	2.15	3.02	2.49	2.75	1.82	1.77
ALG12	9.48	7.65	8.87	10.3	9.83	8.09	7.71	9.11	8.4	7.96	8.36	8.19	11.6	10.5	9.04	8.89	7.52	9.64	11.2	10.8	9.77	9.23	8.14	10.3	9.65	8.75	10.6	5.76	8.37	8.47	7.86	9.45	8.45	9.28	6.93	7.51	6.79	10.1	8.02	7.24	8.72	7.94	8.72	8.7	7.91	8.91	8.21	8.23	8.61
ALG13	3.17	2.61	3.1	2.61	1.36	3.78	4.69	3.57	4.78	3.78	4.63	4.2	2.76	2.06	4.27	3.94	2.83	1.77	3.85	3.08	1.7	3.08	4.62	3.85	3.86	3.26	3.19	4.37	3.53	3.83	3.36	3.48	1.55	2.47	3.91	4.73	4.39	3.05	2.82	3	2.22	4.48	2.86	4.89	3.53	2.55	3.29	3.22	3.27
ALG14	1.08	2.48	1.01	0.663	0.932	0.928	1.63	1.28	0.84	1.24	2.41	1.38	2.02	1.35	1.5	1.33	1.61	1.03	1.47	1.21	2.25	1.04	1.18	1.71	1.43	1.74	1	1.82	1.55	0.96	1.81	3.28	2.58	1.44	1.21	1.46	1.57	1.03	1.47	1.04	0.829	2.41	1.29	2.03	0.981	1.28	1.41	1.83	2.19
ALG1L	0.0283	0.032	0.0244	0	0.0274	0.0209	0.0239	0.179	0.0402	0.116	0.0483	0.0688	0.164	0.0192	0.031	0.22	0.0178	0.0882	0.0422	0	0.0212	0.0365	0.0401	0	0.0734	0.0931	0.0902	0.0894	0.0454	0.0847	0.0488	0.0212	0.102	0.0776	0.0371	0.142	0.0192	0.0797	0.0315	0.0178	0.0366	0.0529	0.155	0.0792	0	0.0331	0.0461	0.0862	0.0273
ALG1L2	0.0269	0.0608	0.0928	0.0587	0	0	0.0569	0.017	0.0127	0.063	0.0574	0.0262	0.111	0.109	0.133	0.0139	0.0676	0.168	0.0802	0.038	0.0805	0.0347	0.0762	0.0808	0.0697	0.0885	0.107	0.104	0.0755	0.0161	0.139	0.0804	0.0729	0.0491	0.0352	0.075	0.0457	0.0757	0.0749	0.0508	0.122	0.0251	0.0339	0.0968	0.0278	0.0472	0.0548	0	0.104
ALG2	4.65	4.74	5.13	4.79	4.66	4.99	6.43	5.37	5.62	6.57	6.14	5.73	5.12	5.86	5.74	6.59	6.25	4.47	5.88	6.58	5.85	5.8	6.23	5.64	5.85	4.86	4.39	6.7	6.71	6.03	6.44	6.23	4.59	4.56	4.11	5.5	6.71	5.75	5.34	4.76	4.74	7.24	5.17	5.81	5.28	5.01	6.08	5.54	6.36
ALG3	9.96	8.65	11.7	6.95	8.6	6.04	8.35	6.29	6.02	8.98	9.53	8.79	12	16.7	9.02	9.64	9.6	10.2	11.1	12.9	15.8	8.67	8.12	6.44	6.67	5.89	5.2	9.48	9.01	9.97	11.4	10.1	16.1	7.43	6.24	9.28	9.97	13.7	10.2	6.7	7.69	9.53	11.6	10.5	6.5	11.9	10.3	11	12.9
ALG5	6.52	8.4	5.57	4.31	4.5	4.88	7.45	6.6	5.63	7.39	8	7.02	7.49	7.68	6.49	6.77	7.26	5.31	6.82	6.7	7.17	5.55	7.37	6.95	6.17	5.77	4.06	8.19	7.48	6.33	7.85	11.6	13.3	5.94	4.4	7.23	8.76	6.94	6.32	4.45	4.72	10.9	6.6	10.1	5.92	8.23	7.53	7.45	13.3
ALG6	3.08	4.13	3.13	3.72	3.45	3.97	4.1	3.92	3.78	4.04	3.34	3.08	2.78	2.99	2.88	3.28	3.46	3.74	3.08	3	3.08	3.82	3.32	4.45	3.49	3.82	4.63	4.1	3.62	3.42	3.88	3.57	3.76	3.48	3.84	3.89	3.74	3.07	3.23	4.15	3.74	4.31	3.54	3.82	4.05	3.84	3.96	3.42	3.76
ALG8	5.72	5.83	9.13	3.16	6.19	4.13	6.46	5.71	4.63	6.31	6.71	5.82	8.22	9.34	6.38	6.4	8.38	5.94	4.92	8.95	10.3	5.87	6.14	4.41	5.1	5.25	4.08	8.43	7.53	6.28	10.7	7.6	10.1	5.03	5.1	7.68	6.72	8.4	7.8	5.18	6.05	8.28	7.86	6.83	5.44	7.08	8.04	8.85	8.15
ALG9	0.973	0.667	1.03	0.725	0.739	0.773	1.1	1.1	0.982	0.973	1.14	1.28	1.17	1.07	1.2	1.24	1.01	0.638	1.05	1.34	1.25	1	1.24	0.887	0.967	0.765	0.589	1.44	1.11	1.33	1.27	1.11	1.08	0.736	0.722	1.21	1.02	0.907	1.09	0.768	0.716	1.18	1.12	1.09	0.876	0.791	1.19	0.988	1.22
ALK	0.00831	0.0047	0.0143	0.00605	0.00807	0.00614	0.0158	0.00526	0.0138	0.00244	0.0124	0.0223	0.00689	0.00846	0.0114	0.0194	0.00523	0.00432	0.0155	0.00883	0.00311	0.00358	0.0147	0.0107	0.00462	0.00684	0.00663	0.0073	0.00668	0.00747	0.00957	0.00933	0	0.0114	0	0.00464	0.0099	0.00781	0.00232	0.00524	0.0135	0.00907	0.0122	0.00832	0.0043	0.00243	0.00848	0.00253	0.00602
ALKBH1	3.25	3.36	3.38	2.81	3.23	2.92	3.53	3.27	2.74	3.36	3.32	3.52	4.22	4.1	3.52	3.58	3.87	4.08	3.01	3.68	4.47	3.67	3.05	3.16	2.93	3.33	2.89	3.75	3.73	3.2	4.32	3.47	3.44	3.52	2.71	3.18	3.74	4.24	3.58	3.33	3.33	3.56	3.48	3.66	3.09	3.62	3.52	3.33	3.76
ALKBH2	2.55	2.09	2.16	2.8	1.92	2.43	2.82	3.14	3.31	3.03	4.37	3.79	3.57	3.76	3.18	4.32	2.64	2.38	3	3.84	4.06	2.75	3.37	2.46	2.95	2.18	2.31	3.54	3.54	2.48	3.14	2.28	4.03	1.95	2.85	3.53	3.29	3.47	3.26	1.52	1.68	2.85	2.4	3.87	2.05	2.33	2.59	3.94	2.52
ALKBH3	3.88	3.92	4.32	3.73	2.93	3.39	3.72	4.3	4.02	4.97	5.4	4.86	5.68	6.63	4.67	5.77	5.3	4.58	5.08	4.6	5.69	4.11	4.88	4.28	3.78	3.46	2.93	5.76	5.44	3.87	4.78	5.07	8.14	3.99	3.91	4.66	5.08	4.79	4.91	3.43	3.18	4.33	5.18	5.22	3.64	4.82	3.99	5.05	6.65
ALKBH4	7.72	13.5	9.28	11.9	12.7	12.1	6.73	8	7.54	5.71	5.66	5.72	7.16	6.38	7.41	6.77	6.43	10.3	7.47	6.27	8.98	7.13	5.71	7.69	7.17	7.61	8.29	4.25	5.14	5.39	4.14	7.1	5.69	12.6	11.8	7.75	4.8	6.71	9.17	10.1	10.7	4.95	6.42	6.66	8.9	6.51	4.56	7.72	5.14
ALKBH5	18.1	15.7	22.3	23	27.2	16.7	14.1	15.3	15.5	17.7	16.5	17.2	23	26.1	18	18.8	23	22.8	20.1	21.8	28.8	20.9	16.8	16.3	17.3	18.3	19	16.7	20.6	18.7	19.7	16.9	22.4	17.8	12.8	16.3	15.3	22.4	20.1	17.9	21.9	17	18.3	16	14.4	17	20.3	18.8	19.9
ALKBH6	8.61	8.8	7.19	8.94	8.12	5.96	7.5	7.45	6.79	5.5	8.43	7.38	8.86	8.97	7.51	8.6	5.63	6.02	16	8.23	9.82	5.67	6.91	8.38	6.66	5.84	6.59	5.36	5.62	8.69	5.66	8.44	11.5	9.31	6.14	8.54	7.09	10.4	9.77	5.18	6.83	6.77	10.2	8.49	5.32	9.51	6.31	10.1	10.6
ALKBH7	14.9	12.5	13.7	20.3	14.7	15.4	12.7	15.8	13.4	17	16.8	19.4	17.6	33.3	19.8	27.6	12.7	14.5	23	17.3	24.5	10.9	22.4	11.4	16	16.1	10.4	8.9	12	12.7	8.54	16.8	19.5	15.1	7.45	18.5	14.7	15.2	12.7	6.17	8.21	10.6	14.3	12.3	7.17	14.8	7.93	21.5	14.9
ALKBH8	1.07	0.804	1.55	1.18	0.696	1.44	1.7	1.69	1.72	1.93	1.9	1.45	1.39	1.08	1.66	1.88	1.59	0.759	1.41	1.72	0.47	1.46	1.96	1.68	1.92	1.1	1.23	2.78	2.16	1.94	2.06	1.33	0.891	0.896	1.55	1.92	2.07	1.06	1.19	1.6	1.56	2.07	1.24	1.69	1.6	1.57	2.09	1.78	1.59
ALLC	0	0	0	0	0	0	0	0	0	0.0106	0	0.00877	0	0.0122	0	0	0	0.0375	0	0	0	0	0.00638	0.00774	0	0	0	0	0	0	0	0	0.0163	0.0165	0	0	0	0	0	0	0.0117	0	0	0	0	0	0.00735	0	0
ALMS1	0.574	0.36	0.849	0.532	0.618	0.452	0.786	0.686	0.706	0.621	0.679	0.62	0.647	0.578	0.811	0.597	0.653	0.593	0.528	0.986	0.53	0.691	0.882	0.651	0.643	0.654	0.394	0.998	1.13	1.15	0.913	0.389	0.446	0.295	0.576	0.793	0.766	0.487	0.631	0.648	0.669	0.745	0.747	0.465	0.941	0.594	0.913	0.585	0.566
ALMS1P	0.0326	0.0922	0.0141	0.0356	0.0158	0.0843	0.0621	0.0929	0.0849	0.0287	0.0418	0.0555	0.0406	0.0221	0.125	0.0423	0.123	0.017	0.0608	0.0923	0.0733	0.0281	0.11	0.077	0.0423	0.0268	0.065	0.0458	0.118	0.0684	0.0375	0.0854	0	0.239	0.118	0.218	0.0721	0.046	0.0909	0.103	0.0317	0.0458	0.096	0.111	0.169	1.96	0.991	0.0398	0.142
ALOX12	10.7	5.36	7.75	6.29	13.6	5.72	3.87	3.68	5.06	3.59	4.68	5.89	5.24	5.72	5.79	4.49	5.12	9.42	4.95	4.23	7.16	4.56	4.17	3.79	5.58	6.75	5.48	3.75	3.04	4.39	3.79	6.82	4.35	5.92	7.23	4.68	3.37	3.39	5.66	7.35	7.04	3.45	5.73	3.18	4.59	4.21	5.03	6.61	4.64
ALOX12B	0.198	0.247	0.229	0.273	0.131	0.231	0.295	0.362	0.34	0.171	0.333	0.233	0.388	0.233	0.336	0.513	0.216	0.152	0.264	0.383	0.195	0.188	0.347	0.259	0.359	0.248	0.216	0.362	0.384	0.287	0.21	0.202	0.151	0.181	0.171	0.325	0.297	0.269	0.191	0.171	0.189	0.143	0.232	0.2	0.226	0.0487	0.136	0.393	0.151
ALOX12P2	0.227	0.142	0.141	0.0458	0.0122	0.102	0.155	0.207	0.131	0.0886	0.204	0.141	0.0731	0.094	0.138	0.176	0.0633	0.105	0.169	0.147	0.066	0.206	0.321	0.211	0.131	0.0933	0.141	0.115	0.131	0.279	0.0869	0.311	0.0797	0.0691	0.0661	0.19	0.201	0.101	0.105	0.167	0.139	0.137	0.201	0.297	0.124	0.0884	0.221	0.138	0.176
ALOX15	3.07	2.81	3.7	0.374	1.45	0.043	1.42	0.239	0.418	1.69	3.39	5.49	6.72	2.24	3.46	12.5	5.14	0.848	5.07	0.889	7.35	8.71	4.61	1.42	9.94	0.799	0.697	3.14	0.374	1.74	3.5	0.595	0.719	0.967	0.0764	3.57	0.132	24.2	1.55	1.15	0.327	0.699	3.74	1.16	3.92	0.0511	0.883	1.4	0.0936
ALOX15B	0.249	0.9	0.567	9.49	1.13	1.19	0.138	2.63	2.07	1.05	0.455	0.429	0.199	1.38	0.226	0.313	0.44	3.91	0.308	1.16	0.761	2.06	0.0679	1.1	0.263	3.72	3.89	0.286	0.908	0.356	1.21	0.581	0.607	5.38	1.2	0.246	0.714	0.883	1.08	5.8	1.13	0.718	0.661	0.706	0.124	2.81	1.74	0.707	0.421
ALOX5	237	235	197	305	476	338	112	178	170	146	83.6	138	154	192	139	111	200	591	115	127	250	253	101	230	163	406	395	61.5	102	99.8	84	93.3	149	312	250	108	84.8	208	209	344	315	121	134	100	214	167	125	116	89.7
ALOX5AP	221	720	497	547	1330	467	168	652	333	174	185	324	272	256	272	285	457	568	111	162	780	562	117	387	200	534	1340	115	179	178	109	329	540	1310	382	183	90.1	369	287	542	500	139	208	193	252	259	135	212	212
ALOXE3	0.0302	0.00853	0.052	0.0219	0.0512	0.0167	0.0255	0.0668	0.0143	0.0177	0.0193	0.0624	0.0688	0.0767	0.0165	0.0743	0.0284	0.0235	0.0169	0.0614	0.119	0.039	0.0374	0.0227	0.0252	0.0496	0.0361	0.0318	0.0272	0.0271	0.0304	0.00564	0.0204	0.0345	0.0148	0.0294	0.0205	0.046	0.0462	0.00951	0.00976	0.0282	0.0254	0.0211	0.0351	0.0309	0.0215	0.0459	0.0182
ALPI	0	0	0	0	0	0	0	0	0	0	0	0	0	0	0	0	0	0	0	0	0	0	0	0	0	0	0	0.00359	0	0	0	0	0	0	0	0	0	0	0	0	0	0	0	0	0	0	0	0	0
ALPK1	31	25.8	21.5	25.9	31.5	43.4	23	19	15.2	16.6	6.94	13.4	18.3	16.6	16.3	11.2	25.4	59.3	13.6	13.4	22.7	24.4	11.7	27.6	23.1	42.3	55.3	8.1	11.5	11.7	11.6	16.5	15.5	35.3	41.4	14.6	9.19	20.7	25.5	49.3	40.9	11	13	14.2	31.3	21.4	20.7	15.7	16.6
ALPK2	0.0642	0.00403	0.0262	0.0389	0.00692	0.0763	0.0136	0.307	0.0253	0.0794	0.0914	0.0243	0.0296	0.00968	0.0234	0.133	0.0807	0.0779	0.0505	0.203	0.00801	0.0154	0.0619	0.171	0.0516	0.0323	0.0341	0.0351	0.0372	0.0534	0.137	0.064	0.00645	0.0163	0.0257	0.0716	0.034	0.122	0.123	0.0405	0.00923	0.0856	0.337	0.0357	0.0553	0.0459	0.0364	0.0456	0.086
ALPK3	0.282	0.289	0.268	0.602	0.289	0.999	0.153	0.222	0.346	0.15	0.164	0.101	0.198	0.131	0.244	0.155	0.15	0.774	0.153	0.114	0.0536	0.336	0.191	0.195	0.203	0.275	0.504	0.0829	0.111	0.0929	0.114	0.146	0.108	0.218	0.591	0.178	0.0722	0.186	0.312	0.23	0.414	0.125	0.178	0.0773	0.222	0.225	0.173	0.193	0.119
ALPL	292	133	149	266	283	473	78	99.3	76.6	132	39.6	152	119	210	132	74.6	244	937	54.5	109	411	68.8	94.1	134	150	801	293	27.3	47.6	64.3	21.6	75.3	128	106	256	48.3	53.7	133	227	347	231	31.2	70.9	38.5	104	137	95.4	98.3	32.2
ALPP	0.00908	0	0	0	0	0	0.00384	0	0	0	0	0	0.0151	0	0	0	0	0.00945	0.00678	0.00321	0.0068	0	0	0	0	0.00748	0	0	0	0	0.00523	0	0	0.00831	0	0.00507	0	0	0	0	0.00588	0	0.00382	0	0.0141	0.0106	0.0111	0	0
ALPPL2	0	0	0	0	0	0	0	0	0	0	0	0	0	0	0.0114	0	0	0	0	0	0	0	0	0	0	0	0	0	0	0	0.012	0	0	0	0	0	0	0	0	0	0	0	0	0	0	0	0	0	0
ALS2	1.33	1.34	1.42	1.57	1.04	1.46	1.15	1.29	1.1	1.4	1.26	1.35	1.13	0.951	1.41	1.32	1.61	1.16	1.4	1.4	1.18	1.72	1.38	1.54	1.62	1.09	1.52	1.5	1.61	1.56	1.34	0.869	0.911	1.21	1.3	0.883	1.38	1.79	1.44	1.51	1.68	1.47	1.16	1.33	1.51	1.1	1.28	1.23	0.975
ALS2CL	1.24	0.924	2.05	1.16	0.986	1.57	2.56	1.73	2.02	1.95	2.83	1.88	1.84	3.11	3.36	4.03	1.76	1.2	1.34	3	1.62	1.6	3.93	0.773	3.22	1.35	1.33	2.65	4.42	1.76	2.2	1.27	1.22	0.836	1.53	2.67	1.67	3.24	1.79	1.07	1.53	1.92	1.9	1.86	1.18	1.09	1.61	3.35	1.43
ALS2CR11	0.0105	0.00795	0.00455	0.00767	0.0102	0.0234	0.0193	0.0245	0.0333	0.0124	0.00601	0.0137	0	0.00954	0.0173	0.0201	0.00221	0.00366	0.00787	0.0149	0.0184	0.00303	0.0299	0.0121	0.0169	0.00868	0.0028	0.021	0.0141	0.00632	0.0121	0.00789	0.00953	0.0161	0.0231	0.0216	0.0203	0.00495	0.00784	0.0155	0.0182	0.0132	0.0133	0.0155	0.0164	0.0144	0.0143	0.015	0.0102
ALS2CR12	0.763	0.658	0.536	0.678	0.351	1.02	0.892	0.54	0.894	0.637	0.608	0.611	0.558	0.456	0.539	0.597	0.374	1.1	0.54	0.604	0.262	0.557	0.6	0.733	0.849	1.1	0.805	0.781	0.478	0.837	0.558	0.619	0.292	0.662	0.73	0.585	0.748	0.462	0.533	0.636	0.41	0.718	0.549	0.709	1.02	0.893	0.649	0.623	0.637
ALS2CR8	0.595	0.712	0.983	0.963	0.232	1.35	1.38	1.16	1.88	1.11	1.16	0.834	0.504	0.33	0.999	1	0.565	0.194	0.725	0.636	0.205	0.785	1.71	1.06	1.43	0.622	0.859	1.83	1.13	1.48	0.912	0.913	0.384	0.572	1.39	1.52	1.92	0.455	0.539	0.681	0.725	1.24	0.781	1.41	1.21	0.879	1.16	1.04	0.832
ALX1	0	0	0	0	0.0195	0	0	0	0	0	0	0	0	0	0	0	0	0	0.015	0	0	0	0	0	0	0	0	0	0	0	0	0	0	0	0	0	0	0	0	0	0	0	0	0	0	0	0	0	0
ALX3	1.48	1.06	1.46	1.56	1.42	1.24	1.07	1.46	1.09	1.09	1.03	1.33	1.36	0.956	1.5	1.34	1.5	1.25	1.25	1.26	0.567	1.21	1.17	1.25	1.42	1.04	1.25	0.848	1.17	1.33	1.06	1.32	0.685	1.92	1.98	1	0.737	1.6	1.5	1.44	1.45	1.1	1.31	0.945	1.19	1.29	1.09	0.966	0.927
ALX4	0	0	0.00411	0.0104	0.00462	0.0106	0.00202	0	0.00903	0.00558	0.00204	0.00232	0	0	0.0104	0.00247	0	0.00496	0.00711	0.00506	0.00357	0	0.00506	0.00614	0.0053	0	0	0.00167	0.00191	0.00571	0.00548	0	0	0.0131	0.00625	0.00266	0.00324	0.00224	0.00265	0.003	0	0.00594	0.00401	0.00191	0.00739	0.00279	0	0.00871	0.0023
ALYREF	20.8	20.6	19.4	12	18.3	10.5	16.8	14.3	10.9	20.8	20.8	20.4	24.8	26.5	18.4	20.4	23	21.2	21.6	25.8	39.8	17.9	13	12.9	12.9	13.5	13.1	16.7	18.5	20.2	25.5	30.1	41.4	21.3	11.6	16.5	18.5	25.3	21.9	14.2	15.7	19.3	23.6	20.7	12	22.3	21.7	18.9	23.5
AMACR	2.61	2.63	1.92	2.18	2.02	1.83	1.5	4.28	1.78	1.93	2.19	2.11	2.47	2.99	2.67	1.84	2.02	4.08	1.43	1.85	3.1	2.46	2.55	1.55	1.73	1.48	4.18	2.1	2.73	2.28	2.4	1.79	1.66	2.98	2.22	2.79	1.98	2.42	1.92	4.38	3.16	1.41	1.79	1.64	2.37	1.6	2.03	2.02	1.83
AMBN	0	0.0298	0	0	0.0128	0	0.0111	0	0	0	0	0.0192	0	0	0	0.00683	0	0	0	0.00466	0	0	0	0	0.00977	0.0325	0.0105	0.00463	0.00529	0	0.0152	0	0	0	0	0	0	0	0	0.0083	0	0.0123	0.0111	0.00527	0	0	0.0376	0.00803	0.00636
AMBP	0	0	0	0	0	0	0.00769	0	0.0086	0.0213	0	0.00884	0.0151	0	0	0	0	0	0	0	0	0	0	0	0	0	0.0145	0	0	0	0	0.0136	0	0	0	0.0203	0.0124	0	0	0	0	0	0	0.00727	0.00939	0	0	0	0
AMBRA1	5.35	4.17	4.92	3.62	5.29	3.19	3.74	2.97	2.99	3.35	3.86	4.03	4.52	4.5	4.03	4.12	4.34	4.9	3.87	5.62	4.25	4.57	3.57	3.28	3.42	3.86	3.75	3.91	4.31	5.14	5.27	4.22	5.45	4.86	4.86	3.66	3.86	4.19	4.33	5.72	7.2	4.46	5.58	3.65	4.11	5.48	4.61	3.76	4.57
AMD1	19.4	16.9	20.4	23	29.2	24.9	13.2	18.5	20.2	16.5	14.4	16.6	16.2	13.9	23	15.1	20.2	20.5	9	12.7	11	25.5	16.6	18.4	16.6	25.1	33.9	15.9	16.8	13.4	17.4	16.1	12.5	21.5	24.5	14.7	13.1	16.9	19.6	32.8	32	15.7	12.9	15.7	17.9	15.6	15.3	18.8	12
AMDHD1	0.439	0.4	0.494	0.488	0.319	0.468	0.629	0.401	0.537	0.65	0.531	0.445	0.253	0.174	0.354	0.657	0.414	0.19	0.409	0.267	0.521	0.467	0.618	0.366	0.28	0.733	0.554	1.1	0.274	0.833	0.617	0.739	0.804	0.546	0.823	0.83	0.647	0.43	0.34	0.438	0.75	0.479	0.61	0.532	0.416	1.15	0.925	0.364	0.912
AMDHD2	10.4	13.8	10.5	21.4	17.1	10.3	10.3	16.7	12.1	10.5	11	11.4	11.7	12.8	12.7	14.3	9.35	11.1	16.9	12	14.8	12.2	11.2	14.7	11.2	9.48	13.5	6.96	8.89	11.5	6.41	11.7	16.1	18.8	10.2	11	8.48	14	12.2	9.75	13.3	9.2	14.4	10.2	9.39	10	10.3	14	8.82
AMELX	0	0	0	0	0	0	0.0528	0	0	0.0731	0.04	0.0455	0.0259	0.0423	0.0171	0	0	0	0.0465	0.011	0.0234	0.0134	0.0442	0.0268	0.0578	0.0257	0	0	0	0.0374	0	0.0467	0.0282	0.0285	0	0.0174	0.0106	0	0.0348	0	0.0404	0.0195	0.0131	0.0125	0.0161	0.0365	0.0382	0.057	0
AMELY	0	0	0	0	0	0	0	0	0	0	0	0	0	0	0	0	0	0	0	0	0	0	0	0	0	0	0	0	0	0	0	0	0	0	0	0	0	0	0	0	0	0	0	0	0	0	0	0	0
AMFR	19.4	17.3	14.3	11.9	14.1	13.3	11.5	8.06	10.6	12.8	10.9	13.4	13.5	10.8	13	11.8	13.5	14.3	12.7	11.7	14.8	12.2	12.2	10.1	9.73	12.7	9.61	13.5	12.2	11.5	11.4	11.5	13.1	13.9	10.6	10.2	11	12.8	9.58	9.65	12	11.8	13.2	11.1	12.6	9.84	12.6	8.96	12.5
AMH	0.0903	0.263	0.15	0.216	0.288	0.114	0.224	0.139	0.165	0.189	0.0606	0.0502	0.16	0.0788	0.156	0.147	0.122	0.0403	0.337	0.155	0.0967	0.111	0.133	0.183	0.158	0.138	0.124	0.0227	0.0725	0.232	0.0446	0.116	0.0233	0.142	0.0846	0.0216	0.079	0.139	0.237	0.0569	0.0668	0.00402	0.0705	0.0361	0.12	0	0.0579	0.252	0.118
AMHR2	0.419	0.316	0.44	0.325	0.434	0.392	0.154	0.168	0.258	0.311	0.281	0.415	0.382	0.285	0.299	0.225	0.343	0.611	0.323	0.341	0.387	0.391	0.233	0.282	0.192	0.391	0.357	0.216	0.303	0.176	0.273	0.293	0.467	0.281	0.211	0.203	0.195	0.447	0.35	0.291	0.362	0.187	0.341	0.168	0.275	0.213	0.257	0.29	0.169
AMICA1	407	435	411	282	562	460	264	383	247	321	188	295	349	422	281	285	432	856	196	243	643	481	217	428	318	493	586	165	200	181	194	147	517	421	236	216	121	510	296	448	379	213	269	190	365	197	190	218	163
AMIGO1	2	0.87	2.72	2.85	1.27	2.47	2.48	2.69	3.6	1.83	3.5	2.9	2.17	2.87	3.28	4.79	2.41	1.06	3.13	4.06	1.02	2.3	3.8	2.44	4	2.11	1.19	4.27	4.19	2.32	3.01	1.44	1.04	1.47	1.63	3.71	3.91	2.5	2.27	2.29	2.46	1.92	2.09	2.08	1.63	1.69	2.02	4.77	0.854
AMIGO2	2.02	2.25	1.63	1.7	1.16	1.98	2.51	1.68	2.98	2.22	2.57	2.02	1.42	1.96	2.43	2.01	1.76	0.59	3.47	2.3	1.1	1.51	2.63	2.16	2.49	1.51	1.09	3.31	2.64	2.57	3.04	2.35	1.76	2.02	2.09	3.84	3.69	1.23	1.84	1.81	2.07	3.61	2.33	2.79	2.14	2.45	2.12	3.84	2.51
AMIGO3	1.85	1.49	1.45	1.67	1.35	1.6	1.56	1.74	1.78	1.46	2	1.68	1.87	1.99	1.88	2.23	1.46	1.08	2.88	2.1	1.14	1.6	1.81	1.73	1.92	1.42	1.47	1.09	1.51	2.08	1.39	1.92	1.35	1.89	1.17	1.76	1.51	2.24	1.72	1.09	1.55	1.55	1.85	1.38	1.41	1.75	1.76	1.98	1.81
AMMECR1	1.2	1.58	1.37	1.32	1.04	1.57	2.3	1.57	1.86	1.66	1.77	1.6	1.26	1.18	1.61	1.79	1.4	0.839	1.59	1.75	0.925	1.39	2.21	1.45	1.86	1.09	1.27	2.44	1.58	2.01	1.74	1.68	0.825	1.19	1.65	1.8	2.08	1.44	1.34	1.37	1.61	2.09	1.38	1.82	1.74	1.48	1.78	1.58	1.81
AMMECR1L	4.33	2.97	3.82	4.01	4.25	5.07	4.35	4.21	4.64	4.3	4.21	4.33	3.7	3.22	4.06	4.35	4.67	3.83	4.12	4.02	3.47	4.62	4.96	4.69	4.79	4.79	5.65	4.76	4.11	4.12	4.12	3.48	2.59	3.75	4.23	3.92	3.97	3.47	3.72	4.76	3.92	4.51	3.82	3.87	4.67	3.77	4.4	3.96	3.5
AMN	0.468	0.454	0.382	0.852	0.195	0.58	0.411	0.402	0.602	0.196	0.522	0.366	0.43	0.386	0.669	0.789	0.231	0.261	0.736	0.71	0.363	0.245	0.705	0.302	0.539	0.578	0.32	0.253	0.41	0.491	0.269	0.313	0.393	0.428	0.494	1.14	0.535	0.393	0.41	0.221	0.455	0.313	0.359	0.442	0.303	0.225	0.423	1.24	0.371
AMN1	6.37	11.9	3.38	9.01	7.52	10.8	6.09	6.72	10.1	4.82	3.84	4.28	3.59	3.21	4.79	4.65	4.34	6.89	3.34	2.73	2.12	4.83	4.67	9.31	4.5	9.06	13.5	4.97	4.03	3.37	3.42	5.61	6.79	11.1	13.8	6.3	4.29	5.73	4.48	9.92	12.8	7.19	3.82	6.14	6.64	6.09	4.33	5.16	4.75
AMOT	0.19	0.0957	0.243	0.264	0.301	0.141	0.31	0.25	0.212	0.188	0.291	0.297	0.24	0.239	0.232	0.269	0.168	0.213	0.579	0.374	0.267	0.311	0.272	0.327	0.22	0.255	0.174	0.41	0.313	0.393	0.296	0.185	0.102	0.129	0.104	0.23	0.199	0.176	0.283	0.187	0.103	0.214	0.178	0.186	0.365	0.179	0.375	0.11	0.291
AMOTL1	0.107	0.111	0.134	0.109	0.124	0.0897	0.108	0.0549	0.118	0.227	0.104	0.125	0.084	0.0864	0.0856	0.09	0.122	0.181	0.0864	0.11	0.104	0.159	0.133	0.0895	0.074	0.143	0.145	0.258	0.213	0.147	0.142	0.0714	0.0654	0.0503	0.137	0.0985	0.224	0.105	0.0806	0.255	0.139	0.155	0.113	0.102	0.112	0.149	0.155	0.0758	0.106
AMOTL2	0.0157	0	0.0135	0.0114	0.0152	0.00771	0.00442	0.00992	0.00247	0.00306	0.00223	0.00254	0	0.0248	0.0115	0.00271	0.00329	0.00543	0.0078	0	0	0	0.0074	0.00224	0.00581	0	0.00417	0	0.00839	0.00313	0.0361	0	0.00472	0.0143	0.0103	0.00583	0.00178	0.00736	0.0116	0.0165	0.0271	0.0147	0.0022	0.0125	0.0054	0.0244	0.0149	0.00637	0
AMPD1	0.0108	0.0367	0.0653	0.0394	0.021	0.024	0.0504	0.0274	0.0359	0.0507	0.0462	0.0316	0.0538	0.022	0.0237	0.0841	0.0476	0.0675	0.0323	0.0383	0.0567	0.0373	0.0345	0.0418	0.0722	0.098	0.0777	0.0608	0.0304	0.0324	0.0374	0.0162	0.0489	0.0297	0.0142	0.0121	0.0405	0.0356	0.0241	0.0205	0.035	0.0574	0.0455	0.0563	0.0224	0.019	0.0574	0.033	0.0835
AMPD2	43	36.2	82.6	84.1	82.9	84.6	35.9	50.4	46	62.9	38.9	45.8	46.6	66.9	58.6	44.5	58.1	97.1	60.1	48.3	94	66.7	53.5	58.2	71.4	88.9	122	16.9	41.8	34.5	27.6	37.2	34.2	34.4	38.2	32.1	16.1	45.7	51.6	48.5	53.2	20	37.7	22.8	41.5	28.3	27.3	35	21
AMPD3	9.51	13.8	9.51	10.5	10.8	14.2	8.13	8.75	9.48	14	6.38	9.54	7.9	7.42	9.69	10.6	10	14.7	5.63	10.2	6.75	11.6	10.7	10.3	10.1	10.5	17.7	7.97	8.17	7.76	5.85	6.2	7.48	7.81	11.3	7.87	7.69	8.98	10.8	10.4	10.4	6.02	6.57	6.83	9.76	5.35	5.23	8.65	5.87
AMPH	0.122	0.215	0.174	0.912	0.686	1.04	0.248	0.303	0.72	0.147	0.273	0.155	0.0819	0.067	0.187	0.126	0.191	0.917	0.289	0.105	0.205	0.275	0.183	0.225	0.183	1.11	0.673	0.157	0.177	0.26	0.188	0.336	0.124	0.507	0.807	0.221	0.44	0.143	0.174	0.719	0.31	0.119	0.265	0.189	0.358	1.74	0.474	0.199	0.323
AMT	5.25	5.74	7.12	4.71	4.31	4.09	5.28	5.92	5.18	3.66	7.45	5.34	7.33	4.85	6.9	5.47	4.24	4.74	5.54	6.34	5.15	2.79	5.13	4.92	4.56	4.54	4.32	5.16	3.77	9.09	4.25	3.68	4.22	6.13	5.02	5.79	4.77	6.73	7.06	3.88	4.74	3.8	6.97	7.61	4.47	4.63	4.75	8.16	6.59
AMTN	0	0	0	0	0	0	0	0	0	0	0	0	0	0	0	0	0	0	0	0	0	0	0	0	0	0	0	0	0	0	0	0	0	0	0	0	0	0	0	0	0	0	0	0	0	0	0	0	0
AMY1A	0	0	0	0	0	0	0	0.00815	0	0	0	0	0	0	0	0	0	0	0	0.00456	0	0	0	0.00553	0	0	0	0.00452	0	0	0	0	0	0	0	0	0	0.00605	0.0215	0	0	0.0201	0	0	0	0	0	0	0
AMY1B	0	0	0	0	0	0	0	0	0	0	0	0	0	0	0	0	0	0	0	0	0	0	0	0	0	0	0	0.00498	0	0	0	0	0	0	0	0	0	0	0	0	0	0	0	0	0	0	0	0	0
AMY1C	0	0.0158	0	0	0	0.0103	0.0119	0.00886	0.0133	0.0164	0.00598	0	0	0	0	0	0.0088	0	0.0313	0.00495	0	0.00603	0	0	0.00519	0	0.0112	0.0147	0.00562	0	0	0.0105	0.0253	0.0256	0.00918	0.0234	0.00476	0	0.0156	0.0177	0	0.00873	0.0177	0.0168	0	0.00819	0.00571	0	0.00676
AMY2A	0.0958	0.0361	0.0826	0.0813	0.0155	0.0589	0.0878	0.0909	0.0907	0.0468	0.0477	0.0233	0.0529	0	0.0612	0.0331	0.11	0.0332	0.0595	0.0678	0.0359	0.055	0.0961	0.048	0.0296	0	0.0636	0.0448	0.0769	0.0765	0.00918	0.0478	0.0577	0.073	0.0837	0.0979	0.0706	0.105	0.0711	0.101	0.0517	0.0796	0.0671	0.083	0.0742	0.084	0.0846	0.0778	0.0847
AMY2B	3.8	5.36	3.38	4.06	2.77	5.19	4.39	4.59	5.23	4.23	3.48	2.55	2.39	2.41	3.52	4.03	3.21	3.47	3.5	2.96	2.04	3.54	5.03	4.97	4.24	4.48	7.29	4.2	3.66	3.18	2.89	3	2.59	4.07	5.17	4.23	3.94	3.26	3.69	5.08	4.39	4.88	3.18	4.88	3.89	3.06	3.27	3.85	3.49
AMZ1	0.0413	0.0334	0.0382	0.0815	0.0114	0.0305	0.0349	0.0672	0.095	0.0242	0.0529	0.0947	0.0538	0.012	0.0776	0.0642	0.0223	0.0307	0.044	0.0772	0.00442	0.0279	0.0585	0.0456	0.0918	0.0874	0.00941	0.108	0.0379	0.053	0.0305	0.0441	0.0213	0.0431	0.135	0.0724	0.0722	0.0443	0.0493	0.0297	0.0153	0.0368	0.119	0.0189	0.0396	0.0242	0.128	0.0216	0.0626
AMZ2	13.8	16.2	12.7	13.9	18.4	16.3	15.8	14.7	14.6	12.2	13.1	14.3	15.4	15.8	14.9	13.6	14.1	17	15.4	13.2	16.8	12.9	12.9	15.5	13.9	14.5	17.6	13.5	13	12.7	13.2	15	15.3	16.7	11.2	12.8	12.6	11.8	15.1	13.9	12.6	13	13	14.5	12.2	14.3	11.8	14.1	15.6
AMZ2P1	0.689	0.676	0.398	0.65	0.609	0.855	0.676	0.957	0.828	0.758	0.763	0.582	0.715	0.575	0.676	0.675	0.671	1.45	0.943	0.645	0.442	0.772	0.887	0.757	0.802	0.722	0.947	1.24	0.772	0.717	0.784	0.826	0.704	0.623	1.33	1.41	0.844	0.483	1.23	0.801	0.691	0.717	0.534	0.951	1.39	0.637	0.531	1.28	1.35
ANAPC1	0.483	0.345	0.748	0.558	0.508	0.448	0.688	0.538	0.643	0.476	0.721	0.596	0.527	0.635	0.642	0.646	0.63	0.378	0.52	1.02	0.47	0.666	0.742	0.565	0.708	0.547	0.484	1.02	0.846	0.917	1.05	0.531	0.466	0.404	0.59	0.792	0.675	0.574	0.644	0.588	0.735	0.794	0.685	0.649	0.646	0.526	0.911	0.629	0.617
ANAPC10	0.787	1.09	0.489	0.64	0.492	0.876	0.903	1.16	1.26	1.17	1.53	1.17	0.707	0.859	1.04	0.975	0.847	0.458	1.32	0.859	0.619	0.965	1.38	1.04	1.13	0.691	0.67	1.65	1.16	0.935	1.4	1.48	1.24	0.793	1.15	1.5	2.07	0.783	0.602	0.706	0.768	1.31	0.729	1.77	1.14	1.05	0.838	1.09	1.38
ANAPC11	14	16.2	11.2	12.9	14.9	9.78	12	14	10.6	12.8	13.9	15	17	23	13.8	15.4	13.1	20	23	14.8	27.4	12.5	12.7	12	11.5	12	11.3	9.62	11.8	11.5	12.2	18.7	28.5	17.4	8.25	12.5	13.3	18.5	14.1	8.22	8.86	13	14.7	14	8.86	14.5	10.5	12.9	14
ANAPC13	23.1	20.7	18.6	17.6	26.4	18.2	16.2	23.8	20.7	17.3	15.4	15.8	20.2	16.6	22.3	17.4	26.1	20	11.4	17.4	18.6	18.9	17.9	13.9	16.4	23	29.3	13.3	19	12.4	19.8	18.5	21.2	23.7	15	16.5	14.7	22.2	17.2	30.1	21.2	15.5	14.6	17.4	16.4	16.6	18.6	19	17.6
ANAPC16	18.9	22.7	16.1	23.4	18.7	21.9	19.6	30.6	26.9	20	25	24.5	21.9	24.3	23.3	25.5	22.5	21.8	19.6	21.6	21.1	20.7	22.9	24.1	21.6	23.9	27.8	27.2	23.3	16.9	18.8	22.7	21.2	24.1	20.3	24.4	20.6	24	18.6	18.6	15.6	18.6	15.7	22.4	16.4	19	18.8	22.8	19.4
ANAPC2	14.2	10.1	14.7	14	12.1	11.2	11.4	11.9	12.9	12.3	15.7	14.1	16.3	17.2	14.4	16.2	12	13.8	23.9	17.9	15.8	13.5	14.4	13.4	14	11.1	10.7	10.1	13.1	16.6	13.3	13.7	15.1	11.9	11	12.9	13.4	14.6	14.3	9.3	11.5	12.2	17	12.8	12.5	14.5	12.9	14.8	13.3
ANAPC4	8.12	9.3	7.19	6.84	5.91	7.25	12.3	8.26	9.33	9.14	8.48	7.31	7.27	6.24	7.92	8.64	7.09	6.15	8.06	7.08	5.31	6.85	8.52	9.42	9.54	7.74	8.21	8.61	7.73	8.11	9.63	8.38	8.68	8.01	8.8	9.66	9.48	6.81	7.08	8.59	7.23	11.3	8.76	10.5	9.65	8.15	9.2	7.87	10.5
ANAPC5	30.4	29.3	31.7	27.4	36	27.5	32.4	29.7	26.3	30.2	32.3	32	38.5	42.4	32.2	32.7	32.6	33.2	34.1	36.9	44.9	29.9	29.5	28.1	30.5	29.8	25.9	36.2	29.7	34.1	35.1	32.2	39.1	29.7	27.8	31.6	29.4	37.5	34.7	25.8	28	32.3	34.3	32.8	26.7	32.7	30.6	34.5	37.8
ANAPC7	9.07	7.53	8.03	8.05	8.65	7.89	8.48	8.01	7.4	8.1	8.65	7.97	9.26	9.29	8.29	8.15	8.65	8.67	7.65	9.68	9.36	8.61	7.43	7.87	7.87	8.45	8.86	8.37	8.41	7.59	9.72	7.48	9.73	8.48	7.91	7.83	7.06	9.84	9.2	8.45	8.52	8.18	8.81	7.79	7.32	7.45	8.66	8.7	8.97
ANG	3.25	4.47	3.01	2.56	4.41	2.34	2.01	4.6	2.26	3.34	2.26	4.76	2.53	7.07	1.82	1.79	2.83	8.45	2.07	2.81	5.19	2.79	1.73	2.1	1.46	3.19	3.51	2.34	2.1	1.36	2.72	7.11	7.48	2.09	1.32	1.17	5.4	3.74	2.51	2.69	3.41	3.44	3.02	3.87	2.4	5.35	4.48	2.24	2.85
ANGEL1	2.94	2.11	4.78	3.21	2.22	3.08	3.9	3.7	4.16	3.26	4.64	3.91	4.34	3.49	4.25	4.29	3.17	2.28	4.25	4.92	2.56	4.19	4.91	3.07	4.19	3.11	2.36	5.15	4.19	4.37	3.76	2.9	1.81	2.11	3.39	4.11	4.66	3.36	3.02	2.99	3.09	3.11	4.31	3.48	3.8	3.22	4.51	4.04	3.28
ANGEL2	3.31	3.66	4.01	4.23	2.23	5.33	4.78	4.65	6.13	5.43	5.09	4.51	3.15	2.84	4.39	4.76	4.32	2.39	4	3.57	2.14	4.14	6.1	4.77	5.34	4.15	4.94	6.25	4.65	5.22	4.8	4.14	3.05	3.38	4.47	5.03	5.43	2.85	2.85	5.59	3.72	5.31	3.47	4.84	5.72	5.34	5.31	4.02	4.82
ANGPT1	0.228	0.17	0.598	3.07	0.885	1.68	0.127	1.26	2.67	0.38	0.259	0.342	0.169	0.517	1.22	0.355	0.238	0.112	0.305	0.14	0.0854	0.638	0.466	0.51	1.25	1.5	1.2	0.341	0.552	0.248	0.225	0.391	0.157	0.593	2.5	0.402	0.149	0.175	0.147	1.1	0.595	0.251	0.25	0.312	0.562	0.576	0.0686	0.15	0.104
ANGPT2	0.0593	0.0615	0.0576	0.0503	0.0767	0.0584	0.0795	0.0375	0.0491	0.0637	0.0823	0.0938	0.0819	0.0402	0.0839	0.082	0.0559	0.0617	0.107	0.101	0.0962	0.0638	0.0858	0.0637	0.104	0.0691	0.0434	0.059	0.0694	0.0592	0.0825	0.0555	0.0581	0.0497	0.0421	0.0993	0.0756	0.0998	0.0771	0.0498	0.0832	0.0801	0.0873	0.0633	0.0766	0.0867	0.0806	0.102	0.122
ANGPT4	0.163	0.092	0.187	0.168	0.0789	0.28	0.143	0.197	0.257	0.159	0.0868	0.138	0.18	0.165	0.163	0.176	0.102	0.0846	0.202	0.11	0.0812	0.123	0.158	0.169	0.246	0.0892	0.13	0.0618	0.152	0.138	0.109	0.112	0.049	0.0867	0.187	0.219	0.175	0.178	0.106	0.154	0.0702	0.144	0.131	0.0976	0.196	0.0951	0.111	0.206	0.085
ANGPTL1	0.022	0.0166	0.038	0.0321	0.00713	0.0813	0.0901	0.0372	0.08	0.0129	0.0345	0.0179	0.0183	0	0.0201	0.0343	0.0139	0.00764	0.00548	0.0208	0.011	0.00949	0.065	0.0221	0.0408	0.0423	0.0762	0.0877	0.0059	0.0132	0.0254	0.011	0	0.00672	0.0626	0.0492	0.0325	0.0138	0	0.0139	0.019	0.0344	0.00926	0.0265	0.0342	0.0129	0.0479	0.00448	0.0425
ANGPTL2	0	0	0.0126	0.0212	0	0.0484	0.00309	0.0138	0.0138	0	0.00623	0.0071	0.0121	0	0.012	0.00378	0.00458	0.00758	0.0163	0.0129	0	0.00628	0.00517	0.00313	0.00811	0.006	0.0233	0.00256	0.00878	0.00437	0.00419	0.0109	0.00659	0.00667	0	0	0.00992	0.00685	0.00406	0	0.00472	0.00682	0.00613	0.00584	0.0151	0.0213	0.0178	0.00889	0.0176
ANGPTL3	0	0	0	0	0	0	0	0	0.0058	0	0	0	0.0102	0	0	0.0127	0	0	0	0.00433	0	0	0.00434	0	0.00454	0	0	0.0043	0	0	0	0.0183	0.0111	0	0.00803	0.0137	0.0167	0.00575	0.00683	0.00772	0	0.00382	0	0	0.00633	0	0.00999	0.00747	0.00591
ANGPTL4	0.0821	0.124	0.1	0.199	0.173	0.0505	0.0811	0.121	0.0843	0.12	0.0702	0.107	0.0681	0.111	0.0675	0.128	0.0688	0.0569	0.174	0.136	0.041	0.1	0.0679	0.118	0.198	0.0676	0.142	0.0721	0.115	0.115	0.205	0.0717	0.0371	0.0751	0.0987	0.0687	0.0652	0.0771	0.145	0.0604	0.115	0.0854	0.173	0.0657	0.0283	0.08	0.151	0.117	0.0924
ANGPTL5	0	0	0	0	0	0	0	0	0	0	0	0	0	0	0	0	0	0	0	0	0	0.00474	0	0.00944	0	0	0	0.00386	0	0	0	0	0	0	0	0	0	0	0	0	0	0	0	0.0044	0	0	0	0	0.00531
ANGPTL6	19.7	22.9	10.2	8.62	9.16	5.28	9.38	7.73	7.3	6.07	9.08	7.66	12.2	11.2	8.79	9.85	6.99	7.35	14.1	9.74	11.6	6.88	7.89	8.78	9.4	6.96	9.99	7.04	10.7	13.3	15.7	20.3	33.2	17.1	21	18.5	10.4	15.9	15.6	22.6	25.1	20.7	19.2	15.8	13.7	23.5	9.62	14.6	15.9
ANGPTL7	0.0116	0	0.0201	0	0.0113	0.00859	0.00492	0	0.0331	0.0205	0.00497	0.017	0	0	0.0128	0.0241	0	0	0.00868	0.0206	0.0349	0	0.00824	0.015	0.00431	0.00958	0.0278	0.00817	0.00934	0	0.0134	0	0.0105	0	0.00763	0.013	0.0237	0.00547	0.00648	0.0147	0	0.00726	0	0.00466	0.0241	0.0272	0.00475	0.00709	0.0112
ANK1	6.3	15.6	0.713	1.62	2.67	2.47	0.636	0.462	0.536	2.08	1.47	1.1	3.62	3.47	1.36	1.31	2	1.95	2.29	1.54	1.17	0.886	0.953	0.413	1.94	2.08	0.806	1.5	1.07	1.89	2.5	2.37	3.09	1.79	2.55	1.28	1.38	0.952	1.38	0.914	1.66	0.41	0.819	0.469	3.14	3.53	2.41	1.24	1.23
ANK2	0	0	0	0.0013	0	0	0.00228	0.00227	0.00934	0.0042	0.000766	0.000873	0	0	0	0.00186	0	0.0112	0.00268	0.00317	0.00269	0.000772	0.00508	0	0.000665	0.00443	0.00572	0.00252	0	0.00107	0	0.00268	0	0.00164	0.0223	0.001	0.00244	0	0.005	0.00113	0	0.00112	0.00302	0.00431	0.000927	0	0.000732	0	0.00173
ANK3	0.364	0.116	0.165	0.219	0.131	0.269	0.681	0.464	0.344	0.526	0.53	0.319	0.252	0.425	0.257	0.446	0.288	0.18	0.23	0.555	0.129	0.351	0.632	0.297	0.519	0.248	0.169	0.271	0.562	0.649	0.571	0.14	0.195	0.109	0.446	0.575	0.555	0.256	0.34	0.321	0.418	0.375	0.479	0.272	0.425	0.197	0.351	0.454	0.277
ANKAR	0.283	0.44	0.45	0.433	0.217	0.54	0.559	0.526	0.707	0.353	0.411	0.393	0.391	0.228	0.504	0.526	0.375	0.245	0.326	0.371	0.168	0.335	0.687	0.499	0.439	0.306	0.4	0.768	0.395	0.502	0.356	0.384	0.197	0.34	0.553	0.484	0.497	0.33	0.315	0.342	0.252	0.421	0.337	0.451	0.491	0.29	0.484	0.467	0.339
ANKDD1A	1.43	3.34	3	3.96	1.44	3.03	1.72	2.31	2.59	3.28	3.04	1.2	1.79	1.86	2.61	1.24	1.88	2.42	2.1	1.76	0.815	1.42	2.67	4.02	3.43	1.66	3.08	1.62	1.6	1.71	1.29	2.26	1.17	5.58	3.41	1.79	2.13	1.01	1.63	5.01	5.54	3.65	1.26	1.65	3.33	1.99	1.7	2.86	1.49
ANKDD1B	0.0563	0.0212	0.0566	0.0818	0.0728	0.208	0.0873	0.0119	0.16	0.0989	0.104	0.0821	0.0311	0.0127	0.113	0.0778	0.0943	0.039	0.042	0.073	0	0.0646	0.106	0.177	0.104	0.0617	0.135	0.0197	0.0828	0	0	0.112	0	0.0857	0.135	0.0628	0.0701	0.0617	0.115	0.0355	0.0728	0.117	0.0552	0.128	0.0485	0.0439	0.115	0.0343	0.109
ANKFN1	0.0107	0	0.00463	0	0	0	0	0.0136	0.00508	0	0	0	0	0	0.0118	0	0	0	0.00801	0	0.0241	0	0	0	0	0.00884	0	0	0	0.0129	0.00618	0	0	0.00982	0	0	0	0	0.00598	0	0.0139	0	0	0	0	0	0	0	0
ANKFY1	11.7	11.4	10.5	9.16	8.52	7.93	8.07	6.89	7.53	7.6	6.86	5.88	6.92	6.14	6.92	5.61	7.17	7.75	8.49	7.65	7.57	9.05	6.88	7.1	7.8	7.27	9.85	6.54	10.4	10.9	11.1	10.3	12.1	11.9	18.9	10.3	8.45	9.74	10.1	25.3	21.7	13	12.5	9.55	15.1	14.1	11.3	8.71	9.39
ANKH	9.8	8.04	4.9	5.23	5.52	6.76	5.32	3.94	5.79	4.7	6.89	6.37	9.56	6.21	5.83	6.65	5.26	5.84	7.77	5.89	4.07	3.95	6.51	4.39	6.38	4.72	4.71	6.15	5.38	5.68	5.35	6.93	4.21	4.87	5.77	5.28	5.04	3.87	4.8	4.2	4.49	3.55	3.83	3.81	7.09	4.38	5.38	5.61	4.3
ANKHD1	18.4	14.3	20.6	17.8	26.4	22.4	17.4	15.3	18.5	17.2	15.2	14.7	14.9	15.9	16.9	14.4	17.3	26.2	14.7	18.7	16.8	21	16.6	19	18.7	25.7	28	16.4	18.1	17.9	17.3	11.9	14.5	16.4	20.7	14.9	13.7	16.4	16.1	25.4	23.7	17.2	18.1	13.9	20.8	16.2	20	14.5	14.5
ANKHD1-EIF4EBP3	19.2	15	21.6	18.6	27.8	23.1	17.9	15.7	19	17.7	15.8	15.3	16	17.4	17.5	15.2	18.2	27.9	15.5	19.8	19.5	21.8	17.1	19.5	19	26.4	29	17	18.7	18.5	17.9	12.4	16.7	17.5	21.4	15.7	14.2	17.7	17.1	26.1	24.9	17.6	18.9	14.6	21.5	17.2	20.6	15.3	15.2
ANKIB1	2.72	4.19	3.95	3.65	2.27	3.76	4.56	3.77	4.67	4.13	3.94	3.81	2.26	1.72	3.89	3.92	2.84	1.96	3.5	3.44	0.924	3.59	4.94	4.4	4.56	2.99	3.52	5.68	4.59	4.94	4.68	3.82	1.84	2.85	4.21	4.6	5.56	2.2	2.41	5.53	4.15	5.82	3.22	4.67	5.01	4.17	4.72	3.26	4.08
ANKK1	0.266	0.394	0.247	0.283	0.119	0.438	0.334	0.33	0.495	0.258	0.787	0.319	0.348	0.424	0.269	0.754	0.245	0.373	0.749	0.438	0.253	0.225	0.881	0.339	0.406	0.202	0.188	0.23	0.563	0.773	0.354	0.199	0.407	0.3	0.228	0.691	0.421	0.678	0.342	0.168	0.351	0.339	0.258	0.574	0.238	0.246	0.485	0.587	0.257
ANKLE1	0.648	1.89	0.939	0.724	0.683	0.442	1.08	0.507	0.625	0.721	0.674	0.705	0.812	0.945	0.803	0.76	0.489	0.909	1.05	0.845	0.606	0.795	0.705	0.619	0.447	0.526	0.484	0.816	0.803	1.02	0.983	0.751	1.08	0.755	0.759	0.863	0.933	1.07	0.83	0.495	0.917	0.919	1.37	0.703	0.904	1.03	1.01	0.676	0.672
ANKLE2	11.8	10.8	10.6	15.3	13.3	15	12.5	12.3	15.4	13.4	11.5	11.4	11.8	12.1	11.4	11.5	10.2	14.2	12.6	12.8	12.3	13.7	12.6	14.9	14.1	14.2	14.2	11.9	11.6	11.7	12.2	10.5	10.3	11.2	11.8	11.2	11.4	10.6	10.1	13	12.1	12.1	11.7	11.5	12.5	11.2	12.3	10.4	10
ANKMY1	2.62	2.85	3.46	2.84	2.32	2.74	3.66	4.37	3.56	2.47	5	3.82	4.27	3.19	3.39	4.83	2.86	1.82	5.68	3.87	1.63	2.55	3.97	3.82	3.5	2.83	2.34	2.88	3.94	3.74	2.94	3.24	2.63	2.18	2.26	4.07	3.54	3.54	3.03	1.94	2.03	2.62	3	3.57	3.23	2.96	2.91	3.87	3.74
ANKMY2	3.64	3.77	3.19	2.77	2.63	3.57	4.33	3.81	3.39	3.54	4.13	3.53	3.69	3.24	3.64	4.21	3.61	2.97	3.95	3.62	2.1	3.44	4.06	3.75	4.09	2.96	3.37	4.16	4.15	4.17	5.11	4.18	2.69	2.9	3.88	3.79	4.57	2.93	3.37	3.83	3.27	4.48	3.84	4.18	3.71	3.49	4.26	3.6	5.2
ANKRA2	4.29	4.44	4.08	6.4	4	6.14	6.14	6.79	6.67	5.48	4.94	4.42	3.32	3.06	4.92	5.23	4.28	2.96	4.56	3.53	3.43	5.01	6.2	6.05	5.78	5.96	7.59	5.88	4.88	5.75	4.24	5.03	3.81	5.01	6.03	6.21	6.49	2.97	4.33	6.71	6.16	6.57	3.82	5.94	5.51	4.65	4.89	5.33	4.6
ANKRD1	0	0	0	0	0	0.00974	0	0.00835	0	0.0155	0.0169	0.00642	0.0219	0.0179	0.00723	0	0	0	0.00984	0.0327	0.0198	0.0114	0.00935	0	0.00978	0.0109	0	0.00926	0.0159	0.00791	0	0	0.0119	0.0121	0.00865	0.0221	0.0135	0.0372	0.0221	0.00832	0.0342	0.00411	0.00555	0.00528	0	0.00772	0	0.0241	0.0127
ANKRD10	22.9	27.3	20.1	26.1	19.2	33	32.2	26.2	26.8	24.1	27.5	25.6	21	17.3	27.1	28	23.3	24.7	27.5	24	17.2	22.2	27.6	23.7	29.1	27.4	28.5	27.9	23.2	23	27.7	26.5	19.8	23.4	28	28	26.4	24.1	24.6	24	22.1	27.7	21.5	28.4	24	18.1	26.4	22	31
ANKRD10-IT1	2.31	2.81	2.46	3.52	0.383	7.21	3.61	2.53	7.82	3.43	3.21	2.87	1.11	0.79	3.98	3.56	1.08	0.657	2.86	1.54	0.591	2.07	7.52	4.02	5.92	2.37	3.38	5.65	2.21	3.22	1.96	2.89	0.267	2.06	7.43	4.27	7.34	0.667	1.29	4.18	2.27	3.09	1.95	3.18	5.69	4.08	5.09	2.02	2.01
ANKRD11	7.02	5.37	7.41	13.2	8.84	11.3	6.31	8.21	11.1	6.96	7.55	6.66	5.5	4.86	7.49	6.82	5.92	7.5	8.49	7.14	2.62	8.77	7.91	9.35	9.22	9.08	10.5	5.63	7.38	8.26	5.36	5.6	2.28	7.11	8.53	6.34	6.33	5.24	5.38	9.99	9.02	5.78	6.67	5.26	9.51	5.7	7.67	6.24	4.89
ANKRD12	4.32	4.72	4.27	7.92	5.03	11.3	5.58	6.2	8.8	8.99	4.4	4.66	2.16	2.83	4.61	4.23	4.94	4.1	4.12	3.43	1.77	6.71	7.48	8.53	8.45	6.84	9.71	8.43	6.5	5.73	4.1	4.91	3.36	3.84	8.32	5.38	5.8	2.94	3.55	10.5	7.67	7.99	3.51	5.66	8.95	5.05	5.68	4.16	3.95
ANKRD13A	74.6	60.3	72.7	82.1	103	80.4	50.6	59.8	54.3	47.5	34.3	50.8	49.6	45.1	50.8	43.4	70.2	86.1	37.3	44.1	54.7	68.8	44.4	52.1	53.2	87.7	127	33	46.9	42.2	45.3	45.7	48.3	100	68.2	50.2	27	51.7	66	110	93.2	44.5	53.1	38.9	64	48.1	52.3	47.8	44.1
ANKRD13B	0.337	0.399	0.428	0.346	0.478	0.285	0.462	0.306	0.311	0.25	0.452	0.367	0.592	0.445	0.297	0.46	0.372	0.188	1.13	0.447	0.338	0.205	0.358	0.465	0.42	0.263	0.118	0.291	0.211	0.885	0.458	0.534	0.401	0.405	0.172	0.371	0.327	0.463	0.723	0.171	0.25	0.284	0.559	0.342	0.344	0.758	0.472	0.28	0.729
ANKRD13C	1.38	1.55	1.51	1.65	0.959	1.77	2.46	1.86	2.14	2.28	2.12	1.98	1.53	1.08	1.95	2.02	1.69	0.664	2.17	1.66	0.606	1.69	2.64	2.2	2.43	1.52	1.39	3.12	2.41	2.74	2.15	2	1.37	1.23	1.7	2.48	2.75	1.31	1.22	1.56	1.41	2.74	1.62	2.47	2.09	2.03	2.06	2.05	2.06
ANKRD13D	93.2	109	74.1	128	144	107	58.5	86	84.1	74.8	65.1	68	89.5	94.6	80.8	74.3	70.1	131	95.5	59.7	124	79.5	62.9	91	87	99.1	131	34.7	53.6	57.8	49.5	76.7	127	107	85.7	60.9	44	107	96.6	80.2	114	62.2	75	59.6	74.4	74.6	52.6	88.2	59
ANKRD16	0.889	0.614	0.911	0.919	0.728	0.955	0.99	0.881	0.799	0.752	0.936	1.01	1.04	1.04	1.15	1.08	0.881	0.554	1.35	1.28	0.961	0.867	1.09	0.695	1.01	0.715	0.74	1.1	0.951	0.97	1.04	0.982	1.08	0.803	0.732	1.21	0.843	0.853	0.93	0.66	0.677	1.03	0.892	0.94	0.699	0.693	1.13	1.07	1.11
ANKRD17	5.06	3.61	6.38	4.64	6.69	5.69	6.09	4.29	5.08	5.05	4.86	4.47	4.45	4.21	5.67	4.81	5.34	6.22	4.37	6.3	3.56	6.12	5.01	4.96	5.33	6.89	5.83	6.26	6.51	6.3	6.5	3.77	3.56	4.58	6.05	5.1	5.08	4.44	4.85	7.94	7.57	5.99	5.72	4.66	6.78	4.87	6.98	4.31	4.93
ANKRD18A	0.00697	0	0	0.0304	0.027	0.036	0.0413	0.00882	0.0924	0.0531	0.0685	0.0237	0.0116	0.0142	0.00382	0.0289	0.0131	0.0217	0.0104	0.0123	0.0104	0.018	0.0321	0.012	0.0594	0.0401	0.0111	0.0147	0.0336	0.0251	0.02	0.00521	0.0063	0.00637	0.00914	0.0117	0.0355	0.00982	0.00388	0.022	0.018	0.0239	0.00586	0.00836	0.0504	0.0163	0.0284	0.0212	0.0134
ANKRD18B	0	0.00785	0.00299	0	0	0.00512	0.00587	0	0	0	0	0	0	0	0	0	0	0.0144	0.00518	0	0	0	0	0.00596	0	0.0114	0.0498	0.00244	0	0	0	0.00519	0	0.00634	0	0	0.00236	0	0	0.00437	0	0	0.00875	0.00555	0	0	0	0	0
ANKRD18CP	0	0	0	0	0	0	0.00293	0.00438	0.00328	0.00406	0.0237	0.00674	0	0.00939	0.0303	0.0108	0.0087	0.0072	0.00516	0.0049	0	0.00894	0.0221	0.0267	0.0103	0	0.011	0.00972	0.00556	0.0207	0.0239	0.00518	0	0	0.00454	0.00772	0	0	0.00386	0	0.00896	0.0129	0.0204	0.00554	0.0143	0.00405	0.00847	0	0.01
ANKRD18DP	0.018	0.0203	0.0155	0.0523	0	0.00664	0.019	0.0284	0.0639	0.0158	0.0154	0.0175	0.00745	0	0.0394	0.0186	0.0226	0.0374	0.0268	0.00318	0	0.00774	0.0414	0.0116	0.02	0.0222	0.00717	0.00316	0.00722	0.00539	0	0	0.00812	0.00822	0.0354	0.01	0.0214	0.0169	0.01	0.0113	0.00582	0.0168	0.0189	0.018	0	0.00526	0.055	0.011	0.0217
ANKRD19P	1.06	1.06	1.1	1.4	1.45	1.34	1.14	0.929	1.02	0.787	0.733	0.736	0.983	0.919	1.06	0.948	0.909	1.28	1.21	0.947	1.3	0.987	0.876	1.02	1.03	1.31	1.49	0.82	0.639	0.893	0.818	0.997	1.03	1.19	1.13	0.926	0.741	1.16	1.06	1.1	1.53	0.841	1	0.786	1.04	0.964	0.585	0.977	1
ANKRD2	0.108	0.122	0.0619	0.209	0.122	0.344	0.0835	0.0795	0.085	0.147	0.046	0.0699	0.149	0.11	0.118	0.0558	0.0564	0.317	0.0536	0.0508	0.161	0.0541	0.0381	0.146	0.0665	0.133	0.215	0.0252	0.036	0.0323	0.0207	0.0537	0.0324	0.0985	0.271	0.01	0.0183	0.101	0.04	0.0792	0.139	0.0616	0.0453	0.079	0.139	0.021	0.0512	0.153	0.156
ANKRD20A1	0	0	0	0	0.0072	0	0.00314	0	0	0	0	0	0	0	0	0	0	0	0	0	0	0	0	0	0	0	0	0	0	0	0	0	0	0	0	0	0	0	0	0	0	0	0	0	0	0	0	0	0.00358
ANKRD20A11P	0	0	0	0	0.0462	0	0.0201	0	0.0451	0.0139	0	0.0116	0	0	0.013	0	0.015	0.0247	0	0	0.0891	0.0102	0	0.0204	0.00882	0.0196	0.0759	0	0	0.0998	0	0	0	0	0.0156	0.199	0.00809	0.0112	0.0133	0	0	0	0.06	0	0.0369	0	0.0485	0	0
ANKRD20A12P	0	0	0	0	0	0	0.00632	0	0	0	0	0.00727	0	0	0	0	0	0	0.0111	0.00528	0	0.00643	0	0.00641	0	0	0	0	0	0	0	0	0	0.0137	0	0	0	0	0	0	0	0.00466	0.00628	0	0	0	0.00609	0	0
ANKRD20A2	0	0	0	0	0	0	0	0	0	0	0	0	0	0	0	0	0	0	0	0	0	0	0.00263	0	0	0	0	0	0	0	0	0	0	0	0	0	0	0	0	0	0	0	0.00312	0	0	0	0	0	0
ANKRD20A3	0	0	0	0	0	0	0	0	0	0	0	0	0	0	0	0	0	0	0	0	0	0	0	0	0	0	0	0	0	0	0	0	0	0	0	0	0	0	0	0	0	0	0	0	0	0	0	0	0
ANKRD20A4	0	0.00838	0	0	0	0	0	0	0	0	0	0	0	0	0.00406	0.00384	0	0	0	0	0	0	0.00262	0	0	0	0	0	0.00297	0.00444	0	0	0	0	0	0	0	0	0	0	0	0	0.00311	0	0	0	0	0	0
ANKRD20A5P	0.0422	0.00795	0.0152	0.0102	0.0273	0.083	0.0624	0.0311	0.0965	0.0165	0.075	0.041	0.0233	0	0.0346	0.0619	0.0309	0.00731	0.0314	0.0199	0.00526	0.0302	0.0572	0.0784	0.0912	0.0405	0.0224	0.0197	0.0705	0.118	0.0445	0.021	0.00635	0.00642	0.023	0.0941	0.0884	0.0198	0.0196	0.0354	0.0227	0.0241	0.0413	0.0647	0.0436	0.0247	0.0659	0.0514	0.0373
ANKRD20A8P	0	0	0.00306	0	0	0	0.003	0	0	0	0.0121	0	0.00588	0	0	0	0	0	0	0.00502	0	0	0	0.0152	0.00263	0	0	0.00249	0.00285	0.0128	0.00817	0.00531	0	0	0	0.0158	0.00241	0	0	0.00447	0	0.00221	0.00298	0.00568	0	0	0	0	0
ANKRD20A9P	0	0	0	0	0.000673	0	0.00088	0	0.000657	0	0	0	0.000575	0	0	0.000359	0	0.000721	0.000517	0.000491	0.000519	0	0	0	0	0.00114	0	0	0	0	0.000399	0	0	0	0.000455	0	0	0	0.000773	0.000874	0	0.000216	0.00117	0	0.000358	0.000811	0.00141	0	0
ANKRD22	1.5	7.86	1.01	2.28	2.94	2.06	5.94	4.22	0.829	2.33	0.779	0.862	1.65	1.05	0.712	0.467	1.46	3.21	4.83	0.58	1.93	2.47	0.243	4.37	1.25	2.51	3.08	0.475	1.66	2.04	1.89	4.03	4.4	19.2	1.96	3.57	1.02	1.8	1.75	2.42	0.943	2.48	0.89	1.73	5.73	2.68	1.07	1.12	9.16
ANKRD23	1.05	0.924	1.11	1.75	0.665	1.12	1.62	1.07	2.04	0.816	1.8	1.42	1.32	0.931	1.11	1.63	0.97	0.86	2.53	1.23	0.74	0.704	2.25	1.64	1.69	0.938	0.716	1.01	0.79	1.87	0.934	1.49	0.547	1.06	1.08	1.54	1.52	1.32	1.24	0.604	0.927	1.21	1.23	1.39	1.38	1.13	1.31	1.22	1.51
ANKRD24	0.168	0.176	0.354	0.329	0.1	0.134	0.4	0.221	0.175	0.299	0.246	0.157	0.29	0.197	0.496	0.352	0.159	0.323	0.425	0.247	0.271	0.123	0.19	0.139	0.269	0.378	0.129	0.179	0.203	0.271	0.223	0.155	0.468	0.172	0.0933	0.473	0.262	0.304	0.263	0.147	0.193	0.232	0.237	0.463	0.15	0.182	0.237	0.725	0.35
ANKRD26	0.169	0.339	0.302	0.26	0.145	0.374	0.419	0.343	0.528	0.459	0.44	0.288	0.226	0.245	0.425	0.321	0.249	0.148	0.221	0.347	0.0806	0.389	0.671	0.531	0.461	0.3	0.245	0.799	0.799	0.553	0.433	0.468	0.236	0.26	0.486	0.512	0.66	0.177	0.201	0.477	0.428	0.712	0.368	0.53	0.546	0.429	0.483	0.382	0.436
ANKRD26P1	0	0	0.0055	0	0.00413	0.00314	0.0072	0.00269	0.0242	0	0.00363	0.00828	0.00705	0.00866	0.00233	0.00662	0.00535	0.00442	0.00317	0.00301	0.00956	0.00549	0.00151	0.00548	0.00788	0.0105	0.0136	0.00597	0	0.0178	0.00979	0.00636	0.00384	0.0117	0	0.00475	0.00434	0	0.00237	0.00804	0.00551	0.00265	0.00536	0.00681	0	0	0.00347	0.00259	0.00821
ANKRD26P3	0	0	0	0	0	0.00516	0.00887	0	0	0	0.00597	0	0	0	0	0	0	0	0	0	0	0	0	0.006	0	0.00575	0	0	0	0.00419	0	0	0.00632	0.00639	0	0	0.00238	0.00328	0.00389	0	0	0	0	0	0	0	0.00855	0	0.00337
ANKRD27	6.55	5.88	7.07	8.3	7.8	7.36	6.64	5.28	5.63	7.9	6.37	6.99	6.08	5.61	6.98	6.32	7.58	5.96	6.39	7.47	5.15	9.01	6.44	6.44	6.69	6.02	8.18	8.71	6.94	7.34	7.87	5.6	5.29	6.81	5.81	6.25	7.61	6.19	6.66	7.75	7.73	7.02	7.45	6.36	7.1	6.39	7.55	6.58	7.17
ANKRD28	3.14	1.87	2.39	5.13	3.37	6.88	3.09	4.46	2.82	3.18	1.94	3.32	1.87	1.74	2.88	2.42	2.9	4.49	2.71	2.68	2.56	2.09	2.97	2.86	3.45	12.1	2.56	4.05	2.69	3	3.1	3.08	1.22	2.31	4.4	2.96	2.72	1.42	2.4	3.98	2.41	3.75	2.27	2.22	3.2	2.16	5.37	2.92	3.02
ANKRD29	0.0229	0.0648	0.0445	0.025	0.0111	0.0592	0.0533	0.0145	0.0814	0.0268	0.0391	0.0557	0.0285	0.0155	0.069	0.0653	0	0	0.0769	0.0162	0.00858	0.0296	0.0771	0.0738	0.0722	0	0.0183	0.0402	0.0506	0.0549	0.0132	0.0428	0	0.0105	0.015	0.0575	0.0467	0.0161	0.00638	0.0578	0.0222	0.025	0.0241	0.00917	0.0414	0.0268	0.014	0.0349	0.0111
ANKRD30A	0	0	0	0	0	0	0	0	0	0	0	0	0	0	0	0	0	0	0.00441	0	0	0	0	0	0	0	0	0	0	0	0	0	0	0	0	0	0	0	0	0.00373	0	0	0	0	0	0	0	0	0
ANKRD30B	0	0	0	0	0	0	0	0	0	0	0	0	0	0	0	0	0	0	0	0	0	0	0	0	0.00209	0	0	0	0	0	0	0.00422	0	0	0	0	0	0	0	0	0	0	0	0	0	0	0	0	0
ANKRD30BL	0	0	0	0	0.0233	0	0	0	0	0	0	0	0	0	0	0	0	0	0	0	0	0	0	0	0	0.00989	0	0	0	0	0	0	0	0	0	0	0	0	0	0.00757	0	0	0	0	0	0	0	0	0
ANKRD30BP2	0	0	0	0	0	0	0	0	0	0	0	0	0	0	0	0	0	0	0	0	0	0	0	0	0	0	0	0	0	0	0	0	0	0	0	0	0	0	0	0.0048	0	0	0	0	0	0	0	0	0
ANKRD31	0.00863	0.0342	0.0186	0.0282	0.00837	0.0382	0.0438	0.071	0.0511	0.043	0.0276	0.0336	0.00358	0.0234	0.0473	0.0313	0.0217	0.018	0.0193	0.0382	0.0162	0.0297	0.052	0.0315	0.0448	0.032	0.031	0.0697	0.052	0.0207	0.0298	0.00968	0.0507	0	0.0424	0.0554	0.066	0.00608	0.0216	0.0299	0.0335	0.0632	0.0145	0.0328	0.0156	0.0227	0.0387	0.0526	0.0229
ANKRD32	2.01	2.36	1.17	4.21	2.22	4.1	2.48	2.83	2.76	1.85	2.16	2.33	1.42	1.35	1.67	1.55	1.74	2.42	1.6	1.6	1.06	2.52	1.92	3.47	2.26	3.41	3.9	2.36	1.75	2.03	1.95	3.18	1.69	2.32	4.02	2.1	1.9	1.42	1.53	4.58	3.26	1.87	1.39	2.12	3.03	2.38	2.54	1.94	2.2
ANKRD33	0	0	0	0	0	0	0	0.00831	0	0	0	0.00639	0.0218	0.00891	0.0072	0	0	0	0.0098	0	0	0.0113	0.014	0	0.00487	0.0108	0	0	0.00527	0	0.00756	0	0	0	0	0	0	0	0.00732	0	0.0085	0.00819	0.00552	0.00526	0	0.00768	0	0	0
ANKRD33B	1.07	1.36	0.744	1.26	1.27	0.826	0.685	0.964	0.696	1.08	0.324	0.644	0.4	0.35	0.48	0.771	0.793	0.827	0.468	0.651	0.284	0.608	0.573	0.875	1.1	0.712	0.561	0.699	0.527	0.743	0.543	0.628	0.217	1.45	1.37	0.665	0.635	0.609	0.679	1.3	1.21	0.66	0.571	0.373	1.34	0.53	0.973	0.689	0.623
ANKRD34A	0.447	0.506	0.532	0.698	0.483	0.591	0.726	0.625	0.635	0.393	0.644	0.568	0.508	0.406	0.561	0.748	0.481	0.285	0.979	0.717	0.324	0.475	0.475	0.935	0.687	0.576	0.362	0.435	0.423	0.722	0.448	0.453	0.215	0.501	0.411	0.463	0.348	0.708	0.514	0.332	0.457	0.411	0.57	0.361	0.451	0.713	0.541	0.554	0.383
ANKRD34B	0.132	0.599	0.248	0.785	0.822	1.89	0.613	0.0209	0.834	0.524	0.221	0.522	0.252	0.157	0.493	0.299	0.254	0.282	0.252	0.201	0.342	0.596	0.202	0.878	1.36	1.54	0.116	0.418	0.412	0.333	0.758	0.46	0.335	0.666	0.538	0.314	0.315	0.162	0.266	1.51	0.566	1.15	0.506	0.334	0.917	0.465	0.821	0.468	0.3
ANKRD34C	0	0	0	0	0	0	0	0	0	0	0	0	0	0	0	0.00498	0	0	0	0	0	0	0	0	0	0	0	0	0	0	0	0	0	0	0	0.00268	0	0	0	0	0	0	0	0	0	0	0	0	0
ANKRD35	0.201	0.561	0.337	0.321	0.308	0.343	0.0721	0.24	0.216	0.336	0.205	0.358	0.302	0.142	0.314	0.361	0.453	0.298	0.508	0.247	0.319	0.217	0.14	0.299	0.382	0.204	0.142	0.226	0.23	0.176	0.102	0.243	0.315	0.297	0.223	0.0691	0.411	0.218	0.285	0.361	0.226	0.0676	0.413	0.161	0.212	0.154	0.177	0.137	0.314
ANKRD36	0.0291	0.0517	0.0538	0.0544	0.00403	0.141	0.0703	0.0315	0.153	0.0438	0.087	0.0606	0.0275	0.0366	0.0637	0.0861	0.0209	0.00864	0.0837	0.0544	0.0124	0.0376	0.144	0.0803	0.0785	0.041	0.0265	0.144	0.0484	0.112	0.0502	0.028	0.0188	0.0418	0.079	0.111	0.138	0.0039	0.037	0.0183	0.0323	0.092	0.0733	0.0665	0.114	0.0462	0.0763	0.0658	0.112
ANKRD36B	0.0305	0.00492	0.0488	0.038	0.00844	0.0385	0.0626	0.033	0.0845	0.0408	0.0316	0.0296	0.0144	0.0059	0.0286	0.0496	0.0274	0.00905	0.0519	0.0216	0.013	0.0187	0.0755	0.0392	0.0548	0.0143	0.0278	0.0642	0.0279	0.0678	0.0426	0.0553	0.00393	0.00398	0.0656	0.068	0.071	0.00613	0.017	0.0192	0.0338	0.0461	0.0256	0.0366	0.103	0.0662	0.039	0.0292	0.0462
ANKRD36BP1	1.26	0.647	2.48	1.97	0.975	2.53	2.43	2.05	3.09	2.43	1.72	1.42	0.914	0.521	1.95	1.53	1.48	0.508	1.77	1.25	0.0836	1.9	2.64	2.08	2.47	1.54	1.96	2.8	1.97	3.39	1.77	1.33	0.0378	1.15	3.41	2.78	3.1	0.583	0.785	3.43	1.88	2.82	1.55	1.71	4.39	2.01	2.99	1.55	1.49
ANKRD36BP2	0.286	0.579	0.428	0.23	0.0584	0.122	0.509	0.314	0.185	0.123	0.27	0.227	0.237	0.153	0.33	0.234	0.0662	0.125	0.0898	0.202	0.225	0.0777	0.298	0.187	0.257	0.248	0.12	0.761	0.423	0.523	0.597	0.777	0.707	0.138	0.365	0.462	0.42	0.148	0.126	0.161	1.07	1.3	0.405	0.518	0.163	0.264	0.38	0.257	1.18
ANKRD36C	0.035	0.0119	0.0453	0.0357	0.00679	0.0413	0.0607	0.0354	0.0978	0.041	0.0628	0.0426	0.0203	0.0095	0.0479	0.0399	0.0308	0.0109	0.0653	0.0409	0.0105	0.0211	0.0657	0.0752	0.0766	0.0202	0.0335	0.0983	0.0632	0.0692	0.0282	0.0393	0.019	0.0288	0.0666	0.0723	0.0952	0.0263	0.0254	0.0265	0.0249	0.048	0.0324	0.0518	0.0941	0.0676	0.0528	0.0384	0.0422
ANKRD37	1.81	1.36	1.83	1.44	1.92	2.18	2.31	2.31	1.62	2.34	2.2	1.9	2.64	2.18	1.89	1.89	2.4	2.29	3	1.98	2.09	1.99	2.55	2.48	2.22	2.23	2	2.22	2.33	2.19	2.17	2.57	3	1.84	1.21	2.36	2.84	2.21	1.88	1.76	1.21	3.14	1.35	2.9	1.25	1.34	1.93	1.94	3.58
ANKRD39	3.04	3.89	2.62	2.74	2.33	2.37	3.88	2.84	3	2.97	4.45	3.84	5.13	4.18	3.61	4.31	3.11	2.14	7.51	3.79	4.62	2.33	4.19	3.43	4.21	2.05	1.89	3.03	3.32	5.06	3.45	7.3	4.99	3.97	2.92	3.57	5.11	3.85	3.45	2.43	2.88	3.61	3.47	4.18	3.46	3.88	3.66	3.14	4.73
ANKRD40	4.14	3.22	4.12	3.08	3.65	3.37	4.87	4	3.81	4.32	4.54	4.91	4.68	3.57	4.3	4.51	5.04	3.02	4.23	5.33	3.88	5.05	4.04	3.83	4.08	3.17	2.65	5.8	5.15	5.18	5.23	3.7	3.72	2.72	3.08	4.48	4.37	4.17	4.6	4.11	3.56	5.02	5.19	4.05	4.06	4.16	4.81	4.71	4.1
ANKRD42	0.895	0.31	1.09	0.703	0.631	0.773	0.783	1.05	1.16	1.01	1.01	0.648	0.725	0.71	0.819	0.896	0.952	0.656	0.781	0.701	0.807	0.888	1.24	0.755	1.03	0.879	0.859	0.857	0.988	0.816	0.702	0.738	0.432	0.446	0.887	0.834	0.882	0.797	0.81	0.916	0.678	0.704	0.769	1	0.799	0.761	1.19	0.601	0.873
ANKRD44	18.6	21.3	21	31.6	21	33.9	22.8	28.4	31.8	28.1	16.7	19.5	12	9.62	20.6	17.2	20	13.4	17.3	13.7	10.7	25.3	23.5	29.3	25.9	27.7	42.9	24	21.6	22.6	17	16.2	13.3	21.2	41.4	24.7	18.5	13.1	16.6	47.4	33.2	24.7	14.4	19.6	36.8	18.6	20.4	15.5	13.9
ANKRD45	0.00975	0.132	0.0126	0.0142	0	0	0	0	0	0.0114	0	0.00474	0.0162	0	0	0	0	0	0	0.00345	0	0	0	0	0	0	0	0	0.0157	0.0117	0.0168	0.0146	0.132	0	0.0639	0	0.0597	0	0	0.00615	0.0252	0.347	0.0123	0.105	0	0.16	0.0278	0.00594	0.0753
ANKRD46	1.27	1.9	0.97	1.88	1.21	2.05	2.56	2.7	2.5	2.21	2.67	2.58	1.47	1.14	2.17	2.28	1.59	0.916	1.76	1.75	1.29	2.01	3.03	2.22	2.34	1.69	1.8	3.95	2.96	2.11	2.14	2.25	1.25	1.4	2.06	3.18	2.89	1.46	1.17	1.87	1.52	2.86	1.47	2.91	2.24	1.83	1.83	2.22	2.25
ANKRD49	6.41	9.51	5.36	8.87	4.62	10	10.2	8.76	12.7	9.34	8.4	7.26	4.75	4.29	7.14	7.06	5.34	5.56	9.71	5.2	2.55	6.97	11.1	12.1	10.2	8.41	10.7	11.3	7.88	7.63	6.54	8.57	4.74	7.06	10.5	10.4	10.1	4.96	4.17	8.06	6.59	11.3	4.74	10.7	10.3	7.56	6.45	5.98	8.57
ANKRD5	0.497	0.354	0.588	0.57	0.509	0.508	0.698	0.474	0.784	0.487	0.832	0.564	0.525	0.462	0.858	0.922	0.677	0.283	0.589	0.795	0.276	0.56	0.804	0.5	0.485	0.544	0.353	1.09	0.67	0.874	0.58	0.612	0.252	0.349	0.38	0.669	0.734	0.278	0.509	0.421	0.573	0.812	0.229	0.474	0.518	0.414	0.433	0.643	0.766
ANKRD50	0.622	0.405	1.02	0.872	0.761	0.966	0.544	0.508	0.69	1.3	0.513	0.521	0.447	0.582	0.501	0.358	0.771	0.881	0.435	0.469	0.41	1.02	0.698	0.774	0.573	0.88	1.03	0.858	1.05	0.665	0.605	0.434	0.519	0.319	0.557	0.527	0.71	0.692	0.447	1.11	0.837	0.94	0.678	0.48	0.975	0.734	0.735	0.649	0.35
ANKRD52	5.29	4.3	6.06	5.03	4.47	4.8	5.79	5.45	5.41	4.57	6.3	5.47	5.66	4.52	5.92	5.79	4.78	4.33	7.77	6.79	4.48	5.5	5.58	5.52	6.18	4.86	4.41	5.33	5.27	6.8	6.26	5.29	3.09	5.02	5.04	5.86	5.16	5.41	5.59	4.63	5.16	5.18	6.37	5.18	6.09	5.16	6.66	5.71	5.83
ANKRD53	0.086	0.0278	0.0583	0.0536	0.0119	0.0181	0.0468	0.0933	0.0582	0.072	0.084	0.0897	0.0713	0.15	0.0673	0.108	0.0541	0.0511	0.0916	0.0435	0.0828	0.0688	0.0609	0.0686	0.0455	0.0101	0.0392	0.0216	0.0888	0.0515	0.0777	0.0551	0.0555	0.0899	0.0644	0.0343	0.0543	0.0462	0.0342	0.0387	0.0477	0.0575	0.0568	0.0442	0.0381	0.0934	0.015	0.0674	0.101
ANKRD54	4.54	3.59	3.93	3.29	3.73	3.32	3.77	3.93	3.28	3.61	4.56	4.29	4.93	8.86	4.04	4.48	5.01	3.99	6.18	4.65	6.64	3.38	4.3	3.65	3.72	3.52	3.08	3.46	5.52	4.79	4.38	4.07	4.75	3.46	3.19	3.92	4.13	5.2	4.6	2.58	4.46	3.65	4.98	3.83	3.08	4.26	3.66	4.39	5.2
ANKRD55	0.688	1.64	1.49	3.02	3.5	3.14	1.59	3.06	3.8	2.48	0.801	2.12	1.95	3.02	2.29	2.93	2.12	4.91	0.567	1.43	2.02	4.79	1.18	1.86	1.31	2.38	2.69	2.29	1.68	0.887	1.7	1.84	1.19	3.59	1.56	2.01	2.12	3.27	2.07	3.24	2.12	1.83	1.25	2.66	1.23	0.914	1.22	1.61	1.14
ANKRD6	0.873	1.59	0.882	1.4	1.4	1.59	0.852	1.55	1.52	1.21	0.905	1.13	0.826	0.762	1.01	1.05	0.858	1.59	1.08	0.737	0.66	1.54	1.1	1.52	1.27	1.07	2.17	0.955	0.928	0.734	0.679	0.594	0.912	1.72	1.37	0.923	0.646	0.876	0.995	1.47	1.68	0.952	0.847	1.03	1.37	0.967	0.814	1.11	0.652
ANKRD60	0.0648	0.147	0.0559	0.0943	0.0838	0.0638	0.00914	0.0683	0.0102	0.0127	0.0553	0.042	0.0358	0.044	0.0592	0.0224	0.0136	0.135	0.0483	0.0153	0.0323	0.0279	0.0535	0.0185	0.048	0.0355	0.0861	0.00758	0.026	0.0518	0	0.0646	0.215	0.0592	0.0425	0.0723	0.0147	0.0811	0.012	0.0272	0.154	0.0606	0.00908	0.0173	0.067	0.0253	0.0176	0.0395	0.0521
ANKRD62	0.00355	0.00803	0.00306	0.00517	0.0103	0.00787	0	0.00225	0.00841	0.00416	0	0.00173	0	0.00241	0.00584	0	0.0067	0	0	0	0	0.00153	0.00126	0.00305	0.00527	0.0117	0.0085	0	0.00285	0.00426	0.00204	0.00266	0	0	0	0	0	0.00167	0.00396	0	0	0	0.00448	0.00284	0.00184	0.00415	0.0029	0.00433	0.00171
ANKRD62P1-PARP4P3	0	0	0	0	0	0	0.00716	0	0.016	0.00992	0.0145	0.00823	0.0281	0.0115	0.00927	0.00877	0.0106	0.0176	0.0252	0.00599	0.0253	0	0	0.0145	0	0	0	0.0119	0.0204	0	0	0	0	0	0	0.00944	0	0.0159	0.00943	0	0	0	0.0213	0.0135	0	0.0198	0	0.0103	0.00816
ANKRD63	0.0228	0	0	0.0497	0.0221	0.0168	0	0.0144	0.0108	0	0.0292	0.0111	0	0.0464	0.0125	0	0.0143	0	0.034	0.00806	0	0.00981	0.00807	0	0.0591	0	0	0	0	0.0137	0	0.017	0	0.0208	0	0.0254	0	0.0214	0.0381	0.0144	0.0147	0.00711	0.0192	0	0.0236	0	0.00929	0	0
ANKRD65	0.0356	0.0269	0.0513	0.0432	0.0115	0.0439	0.0251	0.0301	0.0225	0.00696	0.0711	0.0289	0.0295	0.0645	0.0716	0.037	0.0598	0	0.0709	0.0462	0.0445	0.046	0.0715	0.0663	0.0352	0.0293	0.0663	0.0209	0.0525	0.0427	0.00684	0.0622	0.0107	0.0652	0.0545	0.0265	0.0566	0.0558	0.0397	0.0449	0.0154	0.0408	0.015	0.0571	0.043	0.00695	0.0291	0.0434	0.0172
ANKRD7	0	0.0217	0	0	0.0186	0.0142	0.00812	0	0.00908	0	0	0	0.0159	0.013	0	0.0298	0	0	0.0143	0.00679	0	0	0.00679	0.00823	0	0	0	0.0337	0.0077	0.0115	0.011	0.0143	0	0	0.0252	0.0107	0	0.018	0	0	0	0.00598	0	0	0	0	0.0156	0.0351	0
ANKRD9	15.3	12	1.31	2.23	2.89	3	0.556	0.861	0.812	0.986	2	1.04	6.13	1.92	1.42	1.16	1.36	0.783	5.19	0.516	1.24	0.517	0.533	0.605	1.06	1.61	1.09	1.27	0.611	0.874	0.617	5.88	0.839	1.55	2.06	1.34	0.692	0.542	2.87	0.939	0.788	0.245	0.976	0.359	1.56	1.47	0.941	1.58	1.17
ANKS1A	5.01	3.68	6.08	9.83	8.89	8.67	3.38	6.21	6.08	3.61	3.59	4.03	4.16	3.34	3.68	3.85	5.02	8.05	3.94	3.96	4.1	7.07	3.64	5.15	4.13	10.5	12.2	2.75	4.37	4.04	3.75	3.56	3.04	9.13	6.11	3.43	3.15	4.76	3.92	10.1	6.88	3.85	4.74	3.15	5.33	4.99	6.28	3.39	3.08
ANKS1B	2.34	3.31	2.09	2.88	5.86	3.3	1.54	3.12	2.67	2.77	1.31	1.54	1.8	1.99	1.88	1.65	2.27	3.83	1.29	1.22	5.66	3.05	1.24	3.05	1.79	3.2	4.58	1.43	2.06	1.38	1.86	1.51	4.83	3.17	2.56	1.76	1.04	3	2.37	3.7	4.59	2.75	2.44	1.82	2.26	2.21	1.6	2.27	1.5
ANKS3	2.78	1.64	2.18	2.94	1.87	2.19	2.65	2.47	2.54	2.45	3.71	2.73	3.33	4.03	3.12	3.55	2.36	1.86	4.69	3.58	3.24	2.11	3.46	2.12	2.87	2.48	1.56	2.36	2.81	3.29	2.72	2.47	3.63	1.99	1.82	3.12	2.73	3.33	3.05	1.24	2.04	2.32	3.14	2.62	2.21	2.4	2.39	3.76	2.68
ANKS4B	0	0.0101	0	0	0	0	0	0	0	0.0105	0.00766	0	0	0	0.00491	0.00929	0.00564	0	0	0.00317	0	0.00386	0	0.00385	0	0	0	0.00315	0	0.00537	0.00516	0	0.0081	0	0	0	0.0122	0	0.00499	0.00565	0	0	0.00377	0	0	0.00524	0	0.0164	0.00432
ANKS6	0.729	0.441	0.836	0.756	0.647	0.99	1.13	0.892	0.994	0.745	1.35	1.26	0.976	1.09	1.24	1.64	0.933	0.542	1.18	1.37	0.936	0.73	1.35	0.721	1.05	0.84	0.668	1.37	1.31	0.994	0.933	0.717	0.645	0.606	0.788	1.48	1.02	1.09	1.1	0.673	0.616	0.648	0.827	0.903	0.746	0.499	0.932	1.4	0.652
ANKUB1	0.2	0.0833	0.304	0.689	0.296	0.512	0.0846	0.146	0.209	0.21	0.144	0.179	0.148	0.0571	0.202	0.0763	0.165	0.175	0.0549	0.138	0.252	0.534	0.231	0.199	0.168	0.563	0.461	0.0517	0.182	0.0946	0.0484	0.11	0.171	0.154	0.159	0.0704	0.0179	0.0889	0.258	0.345	0.163	0.0853	0.0486	0.0673	0.0598	0.0677	0.0987	0.141	0.0152
ANKZF1	26	20.7	28	29.4	32.7	29.5	25.6	29.7	33	22.2	29.4	23.3	28.5	29.4	25.5	26.9	24.1	33	29	28.9	30.6	24	22.3	29.5	25.8	32	37.1	20	21.2	24.8	23.8	17.3	23.2	28.5	22.5	25.3	17.6	33	30.1	23.6	25.5	19.6	24.5	23.1	21.4	19.8	21.6	27.2	21.2
ANLN	0.169	0.432	0.174	0.195	0.371	0.157	0.268	0.1	0.228	0.429	0.0676	0.093	0.0905	0.063	0.111	0.0736	0.124	0.341	0.0611	0.118	0.0859	0.0588	0.0774	0.199	0.115	0.126	0.0914	0.178	0.127	0.167	0.374	0.564	0.281	0.27	0.222	0.11	0.273	0.0769	0.164	0.158	0.262	0.574	0.211	0.253	0.113	0.233	0.815	0.223	0.321
ANO1	0	0	0.0111	0	0.00997	0.00379	0.00217	0.0065	0	0.00602	0.00439	0.0025	0	0	0.00282	0.00266	0.00323	0.00534	0	0.00182	0.0077	0.00664	0.00182	0.00221	0.0019	0.00846	0.0082	0	0	0	0	0.00384	0.00464	0	0.00337	0.00287	0.0035	0	0	0.00648	0.00333	0	0	0.00206	0	0	0	0.00939	0.00248
ANO10	6.94	8.8	7.07	8.26	16	8.03	3.41	4.97	5.4	7.15	3.57	5.05	4.71	8.44	4.54	3.7	6.51	20.5	3.8	4.88	11.6	8.25	3.92	6.98	4.25	10.9	13.2	3.69	4.95	3.24	3.7	3.36	8.53	8.49	5.59	2.82	3.41	5.49	5.93	7.84	7.14	4.19	5.31	3.3	5.08	6	4.95	4.24	3.36
ANO1-AS2	0	0	0	0	0	0	0	0	0	0	0	0	0	0.0176	0	0	0	0	0	0	0	0	0.0275	0	0	0	0	0	0	0.0155	0	0	0	0	0	0	0	0	0	0	0	0	0.0109	0	0	0	0	0	0
ANO2	0.0701	0.0158	0.0272	0.0612	0.0408	0	0.00889	0	0.00995	0	0.00299	0.0136	0.0116	0.038	0.0192	0.00726	0.00881	0.0437	0.00523	0.0174	0.0577	0.00603	0.00248	0.012	0.0545	0.0519	0.0112	0.0221	0.0253	0.0084	0.0282	0.0262	0	0.0128	0.0276	0	0.0119	0.00329	0.0039	0.0442	0.0181	0.00437	0.00589	0.0028	0.00724	0.0205	0.0171	0.0128	0.00676
ANO3	0	0	0	0	0.017	0	0	0	0	0	0	0	0.00364	0	0	0	0	0	0	0	0	0	0	0	0	0.00361	0	0	0.00176	0	0	0	0.00396	0	0	0	0	0	0	0	0	0	0	0.00176	0	0	0.00537	0	0
ANO4	0	0	0	0	0	0	0	0	0.00299	0	0.0027	0	0	0	0	0	0	0	0	0	0	0.00272	0	0	0	0	0	0.00666	0	0	0	0	0	0	0	0	0	0	0	0	0	0	0.00266	0	0	0	0	0	0
ANO5	0.086	0.252	0.118	0.0939	0.0835	0.11	0.0877	0.0421	0.0907	0.156	0.0718	0.101	0.081	0.17	0.118	0.0932	0.113	0.106	0.108	0.14	0.0937	0.236	0.0789	0.094	0.219	0.0579	0.0249	0.324	0.148	0.0867	0.175	0.178	0.113	0.0393	0.126	0.129	0.259	0.187	0.0392	0.205	0.104	0.446	0.209	0.316	0.111	0.279	0.196	0.0977	0.168
ANO6	4.79	3.09	5.71	3.37	7.76	3.49	3.85	2.99	3.5	6.07	3.38	4.25	3.32	3.68	3.62	3.31	4.76	4.62	3.26	4.09	4.39	5.12	3.53	3.76	4.25	4.85	3.43	5.59	6.05	4.59	5.19	3.8	3.96	3.07	4.97	3.8	4.37	3.79	3.69	7.42	6.43	6.02	5.06	3.42	5.84	5.78	6.02	3.91	3.59
ANO7	0.041	0.0199	0.0253	0.0639	0.0114	0.0475	0.0297	0.0222	0.0582	0.144	0.015	0.0171	0.00971	0.0278	0.0321	0.0182	0.0184	0.0365	0.0175	0.029	0.0351	0.0277	0.0311	0.0201	0.0391	0.0337	0.0327	0.0206	0.00705	0.0175	0.0404	0.0394	0.0265	0.0214	0.0422	0.0131	0.0578	0.055	0.0326	0.0221	0.0265	0.0237	0.0197	0.0398	0.0151	0.0308	0.0191	0.0607	0.00847
ANO8	2.35	1.67	2.9	2.24	2.15	1.67	3.5	1.92	2.51	2.63	3.62	2.82	2.84	2.66	3.22	3.09	2.02	1.66	6	3.29	1.27	1.96	2.78	2.34	3.19	2.23	1.3	2.03	2.57	3.77	2.52	2.46	1.07	1.49	1.67	3.17	2.55	2.98	2.79	1.5	2.14	2.65	3.55	2.51	3.16	2.35	2.61	4.23	2.88
ANO9	10.4	5.84	12.1	7.55	6.97	7.69	15.8	9.66	10.5	7.84	14	11	13.2	16	14.6	15.3	7.38	5.55	11	17.5	12.1	5.49	15.4	7.73	14	7.91	5.15	9.26	8.6	14.4	12.5	8.98	10.7	5.71	6.91	16.9	8.61	18.9	15.2	4.7	8.29	9.69	12.1	12.7	7.29	6.5	7.55	19.6	9.95
ANP32A	45.6	56.6	46.8	52.5	77.3	50.1	33.2	49.4	36.9	42.2	28.1	42.3	46.1	47.7	42.1	37.6	57.6	82.8	23.7	40.4	76.7	53.8	28.5	43.2	31.9	58.1	73.6	31.9	37.4	30	37	35.5	64.2	65.3	40.5	30.6	25.8	53.1	52.5	67.8	59.2	31.8	38.4	34.7	32.3	36	36.1	34.5	30.2
ANP32A-IT1	0.452	0.727	0.877	1.75	0.424	2.85	0.937	0.708	2	0.94	0.529	0.823	0.349	0.232	0.731	0.56	0.529	0.512	0.456	0.41	0.25	0.776	0.987	1.4	1.42	1.17	1.53	0.373	0.481	0.614	0.416	0.463	0.186	0.733	2.01	0.399	0.597	0.313	0.429	1.67	1.02	0.46	0.357	0.362	1.33	0.863	1.08	0.464	0.253
ANP32AP1	0	0	0.0152	0.0257	0.137	0.13	0.0299	0.0223	0.0167	0.0207	0.0301	0.0172	0.0293	0.0479	0	0.0549	0.0222	0.11	0	0.0375	0.0793	0.0304	0.025	0.0758	0	0	0.0563	0.0124	0.0425	0	0.0203	0.0264	0.0638	0.0323	0.0463	0	0	0.0166	0.0393	0.0667	0.0228	0.033	0.0148	0.0424	0.0182	0.0413	0.115	0.0215	0.017
ANP32B	39.5	44.3	25	22.9	29.2	32.9	28	22.8	28.2	36.7	32.1	33.3	37.8	38.6	31.9	30.7	36.2	33.1	25.7	33.3	40.7	28.8	27.3	22.1	23.9	24	22.9	34.9	34.4	23.9	33.3	37.7	47.4	26.1	23.7	28	31.7	33.6	33.7	20.6	23	24.6	30.1	32.7	23.1	29.8	30.8	34.5	28.9
ANP32C	0	0.167	0.0637	0.161	0.0358	0.109	0.0625	0.0701	0.122	0.0649	0.0631	0.0899	0.0612	0.0501	0.0405	0.0575	0.0697	0.192	0.0551	0.0261	0.304	0.0636	0.0654	0.0634	0.0685	0.122	0.147	0.0778	0.0445	0.0221	0.0425	0	0.234	0.0676	0.0242	0.0824	0.0251	0.121	0.103	0.14	0.12	0.023	0.109	0.0739	0.0955	0.0648	0.0603	0.0225	0.0178
ANP32D	0.0658	0.0744	0	0	0.128	0	0.0278	0.0416	0.0311	0.0385	0.0562	0	0	0.0892	0.036	0.0341	0	0.0684	0	0.0233	0.0493	0.0283	0	0	0	0	0.105	0	0	0.0394	0.0757	0.0492	0	0	0	0	0	0	0	0	0	0.0205	0	0	0.068	0.0769	0	0	0
ANP32E	7.01	12.5	5.6	7.39	5.89	7.78	11.3	8.64	7.74	13.2	8.98	9.68	5.88	6.57	8.33	7.74	7.2	6.24	8.13	8.8	4.18	8	11.2	10.8	11.7	7.33	8.48	15	12.3	10.1	14.3	13.6	8.38	7.22	10	10.7	11.5	5.53	5.95	9.09	8.36	12.6	7.6	12.1	10.4	9.41	12.6	8.64	11.8
ANPEP	127	135	107	114	286	128	49.4	112	92.9	122	47.8	78.7	59.7	152	89.5	58.2	88	287	37.8	62.1	199	135	34.3	84.6	71.4	102	120	31.7	60	50.2	41.2	34	92.7	133	58.4	42.5	30.7	95.5	116	181	144	50.2	64.3	38.6	80.4	67	54.8	50.5	15.6
ANTXR1	0	0.0124	0.00158	0	0.0106	0.0054	0	0	0.00519	0.00214	0.00312	0.00889	0.00606	0	0.00601	0.00189	0	0	0	0.00129	0.00548	0.00315	0.00129	0.00314	0.00136	0.00301	0.0175	0.00513	0.00293	0.00438	0.00841	0.00273	0.0033	0.00334	0.00479	0.00612	0.00249	0	0.00204	0.0023	0.00237	0.0057	0.00461	0.00146	0.00378	0	0.00149	0.00223	0
ANTXR2	16.4	11.5	14	18.2	24.8	18.2	8.34	9.41	9.81	14.3	6.39	8.24	9.34	10.9	8.63	6.97	15.5	25.7	5.27	8.01	11.7	19.1	7.34	11.4	11.1	22.1	21.3	7.49	12.2	7.72	10	7.25	9.5	13.6	13.9	7.07	5.48	9.22	12.6	21.1	21	11.2	8.64	6.08	15.7	9.42	12.2	7.49	6.1
ANTXRL	0.0122	0.0692	0.0211	0.0801	0.0356	0.0271	0	0.0155	0.151	0.0789	0.0209	0.0238	0.0101	0.0083	0.0201	0.0127	0.0154	0.293	0.00913	0.00866	0	0.00527	0.0217	0.0263	0.0227	0	0.00976	0.0172	0.0442	0.0367	0.00704	0.0458	0.0442	0.0112	0.0321	0.0205	0.0624	0.046	0.0136	0.0386	0.00792	0.0191	0.00514	0.0245	0.00632	0.0286	0.00499	0.0522	0.0177
ANXA1	186	250	50.2	229	149	157	129	132	135	269	166	168	107	277	94	118	182	328	209	88.5	143	145	187	221	157	345	164	133	229	101	139	181	247	162	111	127	245	141	78.1	80.6	63.9	208	102	219	169	175	107	95.3	216
ANXA10	0.036	0.0611	0	0	0	0.0266	0.0152	0.0114	0.017	0.0211	0.00769	0.0175	0	0	0	0.00933	0	0	0	0	0	0.00775	0.0128	0	0.02	0	0	0.00632	0	0.0324	0	0.0269	0.0488	0.0165	0.118	0.0603	0.0367	0.00845	0	0.0227	0.0466	0.0674	0.0454	0.036	0.13	0.0421	0.0147	0.011	0.0695
ANXA11	158	121	182	208	325	130	67	118	88.9	97.3	74.6	115	129	150	105	113	147	305	77.9	110	266	164	76.2	108	93	196	240	61.5	91.1	77.7	91.9	81.1	222	211	107	68.1	58.8	156	152	219	197	66.8	126	69.7	91.1	108	104	87.5	69.9
ANXA13	0	0	0	0	0	0	0	0	0	0	0	0	0	0	0	0	0	0	0	0	0	0	0	0	0	0	0	0	0	0	0	0	0	0	0	0	0	0	0	0	0	0	0	0	0	0	0	0	0
ANXA2	43.5	39.5	46.8	17.5	47.8	20.4	35.8	25.1	13.2	42.3	26.1	42	57	55.3	31.8	28.5	53.9	58.2	37.7	46.8	101	41.4	29.2	28.4	16.6	28.8	23.4	38.7	38.5	37	55.3	41	85.8	28.3	21.2	29.3	38.9	51.5	39.3	42.9	33.4	43.2	63.9	36.5	29.9	59.3	54.1	35.7	39.4
ANXA2P1	0	0.0219	0.00837	0.0141	0.0188	0.0286	0.00821	0.0123	0	0	0.0166	0.0566	0	0	0.0106	0.0101	0	0	0	0.00686	0	0	0	0.0167	0	0	0.0155	0.00681	0	0	0	0.029	0	0	0	0	0.0066	0.0182	0.0108	0.0122	0.0126	0	0.0408	0.0233	0	0.0227	0.00791	0	0.0187
ANXA2P2	0.159	0.247	0.172	0.159	0.174	0.0587	0.151	0.0252	0.0941	0.117	0.0425	0.397	0.148	0.108	0.0762	0.0618	0.213	0.248	0.0593	0.0915	0.253	0.197	0.106	0.213	0.059	0.131	0.0951	0.119	0.215	0.107	0.126	0.164	0.287	0.0182	0.0521	0.0666	0.149	0.159	0.111	0.138	0.0643	0.0682	0.61	0.342	0.0925	0.372	0.373	0.0485	0.106
ANXA2P3	0.251	0.153	0.166	0.0702	0.112	0.0997	0.188	0.0854	0.0457	0.158	0.0494	0.16	0.208	0.262	0.0634	0.08	0.206	0.241	0.187	0.184	0.477	0.141	0.143	0.108	0.0429	0.0635	0.0462	0.169	0.108	0.127	0.211	0.13	0.349	0	0.0885	0.194	0.125	0.281	0.172	0.158	0.125	0.0722	0.43	0.162	0.0798	0.395	0.15	0.129	0.177
ANXA2R	11.3	7.84	8.61	10.4	7.17	10.7	11.2	12.1	13.2	9.98	14.4	12.2	14.9	14.3	13.3	15	9.99	6.65	23.8	10.8	13.7	6.54	14.3	11.1	11.8	7.84	7.5	14.9	14	10.7	7.53	14	18.9	13.2	11.8	14.2	8.03	12.7	12.2	5.74	6.21	7.71	8.22	10.4	7.84	8.29	6.19	11.3	9.94
ANXA3	64.1	99	12.1	55.4	64.6	91.3	34	47.5	25.9	40.8	8.26	31.6	10.5	36.3	27.5	13.5	53.8	179	15.6	11.6	39.9	31.3	16.7	54.6	43.6	165	70.8	11.7	15.1	18.9	9.2	20.2	42.3	72.5	84.4	21.9	39.7	22.7	40.4	67.6	45.7	15.9	14	17.6	58.1	28.3	26.3	34.4	36.2
ANXA4	14	24.6	12.1	10.7	13.4	8.06	20.4	11.3	7.38	15.9	11.7	12.9	17.8	14.6	11.9	10.7	17	16.7	13.8	13.5	21.1	15.1	9.47	12.7	7.79	9.09	12.4	14.5	11.8	13.6	19.8	16.7	20.2	15.5	13.9	11.8	17.5	12.4	15.2	16.9	14.1	17.8	25.5	15.9	13.6	30.7	19.7	11.8	16.3
ANXA5	144	81.7	118	82.2	113	97.2	101	84.3	34.2	103	65	79.8	142	119	85.9	54.3	137	183	72.3	99.5	180	161	73.3	83.6	60.7	95.3	96.6	79.8	105	91.2	150	80.1	132	114	71.4	60.6	81.1	110	92.3	140	139	96.3	124	88.7	97.9	107	127	65	77.7
ANXA6	78.2	55.7	90.1	55.9	101	51.8	68.7	45.5	39.3	68.6	77	77.6	110	143	65	73.8	83.4	96.2	86.4	140	120	76.1	66.3	75.1	59.6	49.9	38.5	105	78.3	106	123	67.1	107	63.5	57	55.7	74.5	83	84.3	62	51.8	71.8	99.7	62.7	61.4	80.8	96.6	49.7	88.5
ANXA7	38.1	37.1	43.8	34.4	57	36.6	29.2	36.3	25.6	39.2	30.5	42.8	39	42.8	36.6	33.6	53	58.2	27.7	48	59.6	44.6	32.4	34.4	32.8	47.2	53.2	33.8	39.1	29.5	39.8	25.5	42.7	34.7	23.4	29.7	32.3	41.3	40.4	43.4	33.5	31	36.8	29.7	29.1	31	34.6	32.9	29
ANXA8	0	0	0	0	0	0	0	0	0	0	0	0	0	0	0	0	0	0	0	0	0	0	0	0	0	0	0	0	0	0	0	0	0	0	0	0	0.00434	0	0	0	0	0	0	0	0	0	0	0	0
ANXA8L1	0	0	0	0.0097	0	0	0	0	0	0	0	0	0	0	0	0	0	0.0139	0	0.00943	0	0	0	0	0	0	0	0.00468	0	0	0	0	0	0	0.00874	0	0	0	0	0.0084	0	0.00416	0	0.016	0	0	0	0.00812	0
ANXA8L2	0.0128	0.102	0.0111	0.028	0.0498	0	0.00543	0.00812	0	0.00752	0	0.0187	0	0.0174	0	0	0	0.04	0.00957	0.00908	0	0.00552	0	0.00551	0	0	0	0.036	0.0103	0.00769	0	0.0096	0	0	0.0336	0	0.00873	0.00603	0.0143	0	0.0249	0.02	0	0.0359	0	0	0.00523	0.00782	0.00619
ANXA9	8.55	12.6	10.6	9.94	19	17.5	5.81	8.37	8.12	9.13	5.14	7.84	6.64	8.61	8.97	7.86	11.2	17.7	3.91	6.09	9.99	11.5	6.89	9.67	8.46	13	17.8	4.91	6.77	4.05	5.32	6	3.81	11.6	13.2	6.01	2.99	9.19	10.9	11.8	15.9	6.18	7	5.31	9.77	5.14	5.98	9.83	3.73
AOAH	63.5	65.8	80	58	128	59.3	47.8	49.6	41.7	65.7	46.5	39.6	88	87.9	42.3	30.8	57.8	122	45.2	61.4	94.4	74.7	34.7	62.8	46.2	108	104	38.7	50.6	57.1	45.7	40.3	78.8	62.3	46.1	38.4	40.6	68.3	62.3	115	75.6	42.7	69.1	38.6	72.1	81.5	53	36.3	45
AOAH-IT1	1.27	3.08	1.57	2.38	2.65	3.86	1.35	1.35	2.45	1.68	0.815	0.796	1.43	0.617	0.897	0.518	1.03	3.21	1.15	0.852	1.12	1.55	1.21	1.93	1.52	6.14	5.98	0.415	0.693	1.63	0.392	0.714	0.37	2.33	2.35	0.913	0.85	1.62	0.988	2.49	1.5	0.468	1.17	1.02	2.75	2.21	1.78	0.776	1.58
AOC2	4.46	6.02	10.9	17.9	8.02	15	5.02	8.54	15.7	5.45	5.82	4.41	4.32	3.65	8.24	6.03	5.55	3.69	3.19	4.33	5.46	13.5	7.54	11.5	8.48	8.41	21.5	2.56	4.19	3.41	3.59	5.69	5.22	5.98	10.2	4.18	1.31	6.04	7.03	11.2	8.36	5.16	3.69	3.68	8.99	2.98	2.85	6.15	1.98
AOC3	2.26	2.96	6.05	5.63	5.35	5.69	1.97	3.8	5.6	2.71	2.75	1.8	2.78	1.88	4.31	2.45	2.97	2.7	1.04	1.93	3.69	5.36	2.6	4.76	3.12	3.65	9.8	1.04	1.58	1.19	1.5	2.42	2.53	2.47	3.81	1.91	0.409	3.45	4.33	4.34	3.62	2.06	1.62	1.42	3.16	1.06	1.03	1.44	0.952
AOC4	0	0.0284	0.0867	0.0731	0.0122	0.13	0.0159	0.0397	0.0714	0.0368	0.00537	0.0245	0.0312	0.00852	0.0482	0.013	0.0553	0.0392	0.0375	0.0222	0.00941	0.0595	0.0311	0.0539	0.0745	0.0827	0.18	0.0221	0.0303	0.0226	0.00723	0.0564	0	0.0115	0.0741	0.021	0.0128	0.0295	0.077	0.095	0.0895	0.0431	0.0158	0.0302	0.039	0	0.0307	0.329	0.0121
AOX1	0	0.0239	0.00228	0.00384	0.0102	0.0039	0.00447	0	0.0125	0.0526	0.00676	0.00257	0.00438	0	0.00289	0.00274	0.00332	0.0165	0.00788	0.00747	0.0119	0.00682	0.00187	0.00453	0.00391	0	0.021	0.00741	0.0148	0.00633	0.00607	0.0079	0.0143	0.029	0.0104	0.00884	0.0215	0.00744	0.0147	0.0233	0.0103	0.0165	0.00888	0.0106	0	0.0401	0.0108	0.00322	0.00509
AOX2P	0.0139	0.0709	0.0271	0.0203	0.0135	0.0154	0.0206	0.0309	0.102	0.0531	0.0387	0.0102	0.0462	0.00945	0.00382	0.0361	0.0175	0.0145	0.0364	0.0197	0.00522	0.009	0.0123	0.0329	0.031	0.00573	0.0111	0.0391	0.0559	0.0251	0.0241	0.0208	0.0189	0.0127	0.00457	0.0272	0.0118	0.0295	0.0388	0.0176	0.018	0.0152	0.0117	0.0112	0.0216	0.0326	0.0114	0.0382	0.0235
AP1AR	1.73	2.14	1.81	2.4	1.02	2.7	3.55	3.35	3.54	3.99	2.79	3.27	1.52	1.43	3.02	2.68	1.99	0.95	2.62	2.17	0.946	2.68	3.65	3.24	3.34	2.34	2.13	5.63	4.24	3.14	2.73	2.79	1.52	1.84	3.13	3.93	4.14	1.67	1.48	3.27	2.45	3.53	1.74	4.45	3.4	2.84	2.75	2.89	2.7
AP1B1	18.8	13.4	22	15.5	20.3	13.2	13.3	12.8	11.1	18.8	15.1	15.7	20.5	24.4	16.3	15.6	15.3	28.7	19.7	23.6	26.6	20.4	13.7	14	13.4	17.9	13.9	15	19.5	19.3	19.3	13.6	23.2	15	14.5	12.8	15.7	20.9	14.6	17.5	16	15	24.4	14.3	15.1	19.2	21.3	11.7	16.8
AP1B1P1	0	0	0	0	0	0	0	0	0	0	0	0	0	0	0	0	0	0	0	0	0	0	0	0	0	0	0	0	0	0	0	0	0	0	0	0	0	0	0	0	0	0	0	0	0	0	0	0	0
AP1G1	12.3	10.4	13.2	12.1	17.8	13.8	11.4	12.4	11.2	11.7	9.08	10.8	9.82	8.61	11	9.19	13.5	15.9	8.73	10.9	11.7	14.6	10.2	12.5	11.9	17.8	19.5	10.9	11.5	11.5	12.3	8.56	9.02	13	14.5	9.85	8.94	10.2	11	19.3	16.3	12	12.3	10.2	14.6	11	12.9	8.89	10.8
AP1G2	45.6	51.9	47.7	30.8	50.3	35.9	58.9	45.2	41.9	40.7	50.7	38.3	52.4	49.8	50.6	46.9	35.3	54.7	63.1	54.8	56.3	38.4	39.8	44.6	46.6	42.6	44.6	40.9	36.2	50.1	46.4	39.7	52.3	41.8	39.8	48.6	33.1	69.9	56.9	35.2	49.8	42.9	56.5	43.6	44	47.1	41	55.6	53.1
AP1M1	35.6	25.5	35.4	30.7	57.7	25.5	20.1	21.4	21.1	25.7	26.1	30	37.6	45.5	28.2	25.9	34.6	57.2	29.6	40.9	49.6	40.9	22.5	26.3	20.1	32.5	34.5	20.9	27.3	25.6	28.8	18.7	37.2	35.7	18.9	19.5	22.1	33.9	28.3	32.2	28.4	22.1	37.9	21.5	24	26.2	29.6	24	21.8
AP1M2	0.744	1.11	0.905	0.92	2.08	1.49	0.636	0.903	0.817	0.54	0.635	0.688	0.604	1.46	0.334	1	0.954	0.804	0.422	1.36	2.35	1.68	0.279	0.498	0.948	3.65	2.44	0.355	0.645	1.15	0.342	2.09	2.03	1.1	1.41	0.332	0.309	0.803	2.21	1.53	0.655	1.05	1.21	0.964	0.915	2.02	1.15	0.644	0.976
AP1S1	6.04	9.65	5.64	4.75	5.55	4.46	6.9	6.39	4.36	5.8	6.58	7.05	9.15	9.37	6.83	7.1	5.83	7.96	9.08	7.13	12.4	5.51	7.34	6	5.19	5.44	4.8	7.76	5.31	6.15	8.1	11.6	13	8.13	5.17	6.27	7.13	7.33	7.07	4.15	5.32	7.94	8.69	8.42	4.44	10.3	7.4	7.46	9.18
AP1S2	17.4	29.9	16.7	13.8	13.8	26.1	32.5	24.2	22.6	75.7	22.3	24.6	17.3	19.4	20.4	17.8	19.4	24.4	28.3	15.7	20.5	24.4	27.1	31.7	19.6	20	22	46.8	36.1	24.1	22	27.2	29.5	12.6	16.8	37.2	37.5	23.5	16.7	18.9	18.8	47.1	18.2	45.2	25.3	30.5	15	28.2	29.6
AP1S3	0.345	0.346	0.326	0.232	0.152	0.341	0.774	0.301	0.413	0.4	0.542	0.507	0.313	0.3	0.442	0.526	0.221	0.284	0.403	0.449	0.288	0.244	0.615	0.5	0.391	0.434	0.332	0.393	0.193	0.527	0.401	0.424	0.335	0.589	0.474	0.566	0.328	0.373	0.326	0.361	0.4	0.643	0.38	0.474	0.753	0.331	0.39	0.297	0.838
AP2A1	50.8	35.9	41.8	45.6	55.8	41.4	22.7	23.6	24.5	35.4	28.1	31.1	53.4	43.8	34	25.4	34.1	49.4	37	30.5	51.5	34.9	29.8	28.1	26	47	48.9	13.8	28.8	29.2	22.7	29.3	34.6	35.9	30.1	23.2	20	31	31.9	37.1	37	19.3	39.7	20.9	32.3	32.2	32.1	26.1	20.9
AP2A2	10.3	7.62	11.4	9.25	12.3	7.85	8.98	7.91	8.4	8.94	9.82	9.48	11.3	13.7	9.04	9.52	9.05	12.7	11.2	11.9	13.7	9.95	8.8	8.4	9.58	11	8.98	8.22	10.4	9.51	9.42	7.36	10.9	8.84	7.06	7.91	8.05	10.6	9.22	9.27	10	8.06	10.3	8.17	8.56	8.82	11.4	10.4	9.03
AP2B1	23.4	23.4	22.8	16.4	31.1	17.9	20	15.8	14.1	16.5	16.2	17.5	22.5	22.3	17.5	17.2	18.9	25.2	17.6	23.6	21.4	22.2	17	18.9	16.6	19.3	25.8	20.6	21.4	21.2	23.6	15.3	22.1	21.9	18.5	15.8	15.1	20.3	20.4	27.8	25.4	18.3	22.9	15.7	20.2	21.6	20.4	16.8	19.6
AP2M1	124	114	124	91.4	160	91.3	65.8	71.9	61	95.8	81.7	94.1	145	170	84.4	87.6	116	169	91.2	105	193	99.3	64.1	71.4	73	103	101	75.7	80.7	74.9	89.5	86.9	160	118	68.4	61.4	65.9	113	102	90.8	88.6	67.4	105	65.7	79.2	114	85	75.1	82.1
AP2S1	68.6	74.8	46.7	41.8	47.8	36.1	28.5	28.2	23.3	54.7	39.8	41.1	72.8	84.7	38.2	35.3	48.4	67.5	57.8	45.8	106	40.6	32	28.9	26.9	41.9	32.3	34.2	41.2	35.7	40.4	53.4	95.4	50.4	27.9	36.2	40.4	52.4	41.6	35.5	33.2	29.8	51.3	43.6	30.1	63.8	37.3	41.4	49.1
AP3B1	11.4	9.05	12.7	10.4	15.1	8.68	7.74	8.59	7.41	9.69	6.3	9	7.33	10.2	8.95	8.44	11.6	15.9	6.74	10.2	11.4	14.4	6.8	9.48	7.85	13.4	15	10.7	11.4	10.3	12.4	8.1	10.6	10.7	12.7	7.49	7.3	9.85	8.86	20.4	14.9	10.2	11.8	7.91	11.1	10.6	12.4	6.58	9.07
AP3B2	0.112	0.334	0.0788	0.143	0.43	0.275	0.226	0.0845	0.0632	0.4	0.054	0.0616	0.169	0.119	0.0693	0.051	0.155	1.88	0.0839	0.0995	0.116	0.0333	0.0772	0.0875	0.112	3.12	0.235	0.042	0.183	0.0716	6.52	0.142	0.152	0.0643	0.604	0.0745	0.127	0.36	0.258	0.164	0.61	8.69	0.109	0.0422	0.0218	17.4	0.086	0.544	0.0746
AP3D1	19.4	14.5	21.1	18.7	24.5	16.8	14.3	13.5	14.6	18.2	15	17	19.2	21.5	16.8	16.9	17.7	23.4	20.7	22.2	21.4	20.6	14	16.3	16.5	22.7	18.3	12.1	18.5	18.9	18.5	13.9	20.3	17	15.2	13.5	13.7	19.2	16.9	19.1	21.5	16.8	19.7	14	17.3	17.9	19.6	15.4	15.3
AP3M1	7.5	8.54	9.1	7.32	8.84	7.06	8.99	9.32	7.66	8.96	7.97	8.91	8.28	8.56	9.3	7.83	8.9	7.41	7.42	9.43	7.72	11.2	9.19	8.98	8.38	8.43	9.45	11.3	9.85	9.12	10.3	8.61	6.42	7.26	8.8	9.47	8.64	7.89	7.76	9.72	10.9	9.62	8.37	8.68	10.7	8.43	9.05	8.22	8.37
AP3M2	3.51	2.53	3.38	2.27	2.73	3.44	5.61	3.63	3.18	3.98	5.49	4.46	3.53	4.13	4.72	4.5	3.83	2.62	3.17	5.33	2.34	3.35	6.63	2.47	4.2	2.76	3.76	5.52	4.09	3.7	4.94	2.82	3	2.36	2.98	4.5	3.89	4.18	3.9	2.84	3.17	4.88	3.69	4.11	3.58	2.36	3.96	4.11	3.86
AP3S1	1.68	2.88	1.04	2.07	2.41	2.15	1.46	1.82	1.69	1.98	1.16	2.05	1.47	1.47	1.63	1.5	1.61	2.23	1.7	1.05	1.88	1.37	1.46	2.04	1.45	2.03	2.32	1.57	1.36	1.31	1.24	1.69	1.84	2.05	1.67	1.59	1.64	1.15	1.28	2.48	1.94	1.25	1.18	1.58	1.27	1.64	1.12	1.98	1.35
AP3S2	7.5	7.75	8.17	7.64	10.9	8.88	5.68	7.51	5.33	8.81	7.02	8.56	7.1	9.65	7.58	5.59	10.7	12.8	6.78	7.98	10.3	8.4	7.35	7.84	5.39	6.84	9.05	6.11	5.73	6.19	5.23	6.3	7.57	9.17	5.95	4.61	5.7	8.26	8.84	7.59	6.79	4.74	6.68	5.26	6.15	6.89	4.95	7.3	6.88
AP4B1	9.71	8.73	9.04	7.85	9.06	8.91	10.5	10.2	10.1	9.33	11.8	10.1	10.1	10.4	9.2	9.78	8.82	10.6	10.2	11.2	12	10.2	9.75	10.8	8.95	7.77	10.1	10.1	9.78	11.3	10.4	8.9	9.96	8.19	7.62	10	8.56	11.6	10.8	8.83	6.92	9.57	10.2	10.2	8.5	8.59	9.91	8.52	10.1
AP4E1	1.33	1.26	1.32	1.41	1.1	1.7	1.61	1.22	1.57	1.7	1.27	1.18	1.06	1.03	1.34	1.1	1.12	0.935	1.11	1.16	0.917	1.84	1.57	1.55	1.35	1.14	1.25	2.08	1.71	1.76	1.63	1.02	1.1	1.06	1.55	1.41	1.75	1.11	1.02	1.48	2	1.86	1.24	1.66	1.65	1.71	2.1	1.15	1.39
AP4M1	4.5	2.59	3.58	3.36	4.26	3.07	3.23	3.32	2.89	4.49	4.28	4.31	4.32	4.52	3.62	4.59	3.94	5.21	5.51	5.35	6.78	3.91	3.41	4.24	3.17	4.03	3.76	3.19	3.56	3.46	4.21	3.22	5.56	3.35	2.46	2.8	3.69	3.75	3.96	3.16	3.18	4.07	4.69	4.25	2.82	5.06	4.25	2.79	4.01
AP4S1	0.552	0.62	0.691	0.605	0.563	0.651	0.988	0.758	0.692	0.797	0.862	0.826	0.813	0.777	1.04	0.886	0.795	0.664	0.67	0.942	0.722	0.605	0.894	0.598	0.866	0.614	0.706	1.31	0.934	0.721	0.851	0.607	0.659	0.618	0.678	0.922	0.862	0.741	0.76	0.597	0.568	0.597	0.705	0.842	0.732	0.547	0.764	0.818	0.777
AP5B1	54.9	74.9	42.2	83.8	67.8	78.9	30.6	39.6	40.3	29.9	17.4	25.9	27.7	26.9	31.1	26.7	34.1	57.7	38.3	22.5	26.9	41.2	27.4	46.5	36.6	54.8	78.2	10.8	25.3	30.5	26.8	50.5	33.4	104	100	33.2	26.4	31.4	41.4	91.6	96.4	34.6	44.4	27.4	68.1	56.1	36.6	39.6	30.8
AP5S1	2.68	2.72	3.67	2.54	3.06	1.92	2.3	2.55	1.89	2.96	3.54	3.28	4.09	5.1	2.64	3.39	3.31	2.52	4.5	3.67	4.58	2.67	2.96	2.55	2.87	2.21	2.09	2.8	3.3	3.54	3.46	3.5	4.35	3.06	2.49	2.79	3.14	3.16	3.39	2.16	2.84	3	4.28	2.96	2.33	3.36	3.05	3.3	2.94
APAF1	11.3	14.7	13.1	20	24.6	22	9.54	16.1	20.6	16.2	7.64	9.02	8.1	7.43	11.9	9.09	11.2	13	6.76	6.77	13.4	19.2	9.26	16.8	12.8	18	28.4	9.27	12.7	9.01	10.8	8.2	11.4	16.3	21.1	10	7.88	10.9	10.4	28.5	30.7	17.2	11.9	9.5	19.8	13.1	11.6	11.7	7.16
APBA1	0.0633	0.0179	0.125	0.0374	0.0768	0.0496	0.0837	0.0626	0.105	0.146	0.0946	0.11	0.082	0.102	0.124	0.16	0.0846	0.0617	0.198	0.132	0.124	0.129	0.17	0.0527	0.0924	0.0391	0.082	0.0958	0.154	0.064	0.041	0.0651	0.0286	0.0108	0.0156	0.0596	0.0619	0.091	0.0573	0.107	0.154	0.0432	0.0898	0.0206	0.0593	0.0139	0.0629	0.0217	0.042
APBA2	7.85	3.71	7.65	10.5	6.89	11.1	7.19	8.47	11.5	5.63	10.4	8.35	10.5	8.27	7.58	9.21	7.05	2.63	10.3	7.98	5.96	7.19	7.08	12.1	9.77	11	6.51	8.37	11.2	12.9	9.22	6.01	6.15	6.6	6.03	10.4	7.98	5.75	7.24	7.95	6.87	3.91	7.97	6.07	3.98	3.21	8.04	11.8	4.66
APBA3	13.7	11.6	9.62	12.3	12	9.44	9.6	9.38	8.53	8.01	11.9	11.4	12.9	14.4	12.8	13.3	9.54	10.1	18.6	14.3	11.3	9.03	11.1	10.7	13.1	8.81	6.56	5.92	8.93	12.6	9.55	11.6	13.2	13.1	7.78	11	10	10.9	12.1	8.34	11	8.69	12.5	8.44	9.82	10.2	8.06	13	13.1
APBB1	6.13	2.54	6.92	6.85	5.1	6.36	6.46	6.53	7.53	5.2	10.1	8.37	8.05	11.4	9.73	12	7.25	5.03	6.88	11.5	9.19	7.95	8.04	4.77	8.19	7.12	4.93	9.51	12.1	7.43	7.69	5	7.65	5.22	4.51	9.12	6.96	8.42	7.43	3.96	5.74	2.67	6.42	7.29	4.69	4.03	4.98	10.8	3.92
APBB1IP	143	82.7	136	131	258	133	69.1	65.1	67	69.5	44	71.3	86.2	106	78.7	59.6	109	251	53.5	75.2	169	136	51.8	75.4	81.3	180	195	45.5	65.2	65.8	63.7	46.1	115	113	102	50	42.9	103	119	219	185	52.3	95.8	46.8	89.3	99	76.1	64.3	60.2
APBB2	0.187	0.276	0.115	0.353	0.214	0.372	0.0888	0.133	0.174	0.0897	0.0714	0.108	0.106	0.119	0.135	0.0793	0.23	0.156	0.0507	0.109	0.121	0.143	0.0492	0.0888	0.134	0.509	0.332	0.145	0.041	0.0781	0.0473	0.0785	0.115	0.15	0.368	0.0854	0.0733	0.0972	0.0963	0.541	0.24	0.091	0.157	0.111	0.0762	0.146	0.164	0.109	0.0574
APBB3	16.1	20	17.3	19.9	13.9	19.7	15.1	15.3	16.9	13.6	13.7	12	11.4	14.3	15	14.3	11.2	18.7	16.5	13.2	13.7	11.5	14.4	17.9	17.2	17	20.2	9.52	10.7	11.7	10.2	12.5	17.2	14.4	16.5	14.4	11.3	16.3	16.7	16.2	21.6	15.7	15.4	13.5	14.6	14.1	11.2	19.9	12.8
APC	2.97	2.55	3.18	5.17	4.38	6.71	2.65	3.26	5.32	4.08	2.08	1.95	1.71	1.48	2.45	1.76	2.84	3.05	1.99	1.8	1.3	4.12	3.11	3.74	3.92	4.16	6.27	2.86	2.86	2.68	2.33	2.16	1.66	3.05	5.69	2.54	2.29	1.88	2.26	7.03	6.15	3.85	2.32	2.12	5.5	3.65	3.57	2.11	1.71
APC2	0.48	0.479	0.479	0.661	0.6	0.494	0.316	0.45	0.425	0.361	0.408	0.506	0.574	0.513	0.451	0.48	0.482	0.624	0.54	0.595	0.45	0.476	0.435	0.423	0.452	0.427	0.505	0.22	0.389	0.389	0.393	0.397	0.413	0.662	0.34	0.397	0.309	0.384	0.422	0.403	0.422	0.286	0.601	0.32	0.432	0.426	0.359	0.432	0.314
APCDD1	0.874	0.356	0.61	0.214	0.306	0.27	0.409	0.302	0.337	1.43	0.504	0.974	0.211	0.71	0.613	0.437	1.08	0.412	0.773	0.529	0.472	0.368	0.443	0.375	0.396	0.544	0.357	0.525	0.347	0.366	0.526	0.297	1.07	0.27	0.167	0.187	0.66	0.821	0.43	0.718	0.48	0.288	0.936	0.301	0.447	0.797	0.489	0.347	0.206
APCDD1L	0.0335	0	0.00361	0.0122	0.00812	0.0124	0.00354	0.00529	0.0119	0.0049	0.00715	0.0122	0	0.017	0.0138	0	0	0	0	0.00888	0.00627	0	0.00593	0.00719	0.00931	0.0138	0	0	0	0.01	0	0	0	0.00765	0.00549	0	0.00285	0.00393	0.00466	0.0158	0.00542	0.00522	0.00704	0.00335	0.013	0.00489	0	0	0
APCS	0	0	0	0	0	0	0	0	0	0	0	0	0	0	0	0	0	0	0	0	0	0	0	0	0	0	0	0	0	0	0	0	0	0	0	0	0	0	0	0	0	0	0	0	0	0	0	0	0
APEH	21.5	18.2	25.5	20.8	25.6	16.6	20.4	19.9	16.7	20.6	22.8	23.8	27.6	33.2	21	22.6	24.6	31.1	24.4	29.7	35	24.3	20.6	19.3	18.9	20.2	19.7	20	22.4	20.9	21.8	21.4	29.4	23.9	14.9	18.3	21.5	25.5	22.3	20.1	18.8	17	29.5	20.5	16.5	24	23.3	20.9	23.2
APEX1	25.8	30.3	34.3	26.4	27	29.3	29	32.9	29.6	39.8	43.2	39.8	45.7	56.4	38.3	39.3	38.9	32.7	34.9	50.6	53.4	30.9	32.8	27.4	32.7	29.1	21.3	50.5	40.9	33.6	42.6	33.1	42.6	26.1	28.5	41	35.7	43.3	40.4	19.5	24	32.7	45.1	40.1	24.9	31.5	34	45.3	36.8
APEX2	9.71	7.64	9.42	6.3	7.3	5.74	8.27	6.06	5.44	7.19	9.25	8.02	11.1	10.1	8	8.12	8.86	8.74	9.39	11.1	12.6	8.79	7.71	6.31	5.81	6.03	5.54	8.02	7.81	8.03	10.1	9.1	11	8.84	6.06	6.84	7.98	11.9	9.2	6.48	6.67	8.31	10.7	8.15	6.29	8.19	9.21	7.01	8.87
APH1A	63.2	59.6	59.2	53.8	68.9	50.7	50.6	61.5	45.2	51.7	53.1	61.4	69.9	63.7	58.2	56.8	67.8	67.4	63	61.9	87.4	58.6	51.6	52.5	50.2	56.3	63.5	50.2	50.4	55	54.9	69	77.9	76.7	49.6	57.1	51	63.6	64	62.6	56	50	66	60.3	54.7	62.7	51.6	59.8	56.1
APH1B	6.57	7.55	5.98	13.1	12.3	10.7	6.1	6.66	7.29	7.45	5.22	6.05	6.01	5.03	6.65	4.76	7.32	12.3	3.87	5.31	7.48	7.62	4.84	7.05	6.02	10.7	14.8	5.09	5.42	5.18	4.81	5.98	6.42	13	10.9	5.44	5.31	5.71	5.76	17.7	12.4	6.61	7	6.8	5.28	7.75	7.45	6.11	4.44
API5	3.77	4.21	5.16	4.17	4.67	4.16	6.47	5.58	4.46	5.71	5.67	5.37	4.4	4.91	5.64	5.44	5.55	4.53	4.94	6.18	3.15	6.02	6.11	5.52	5.58	5.27	4.31	8.61	6.76	6.15	7.76	5.46	4.42	3.8	5.13	5.78	6.38	4.19	4.21	5.59	4.45	6.14	5.48	5.54	5.69	5.14	6.39	5.42	5.41
APIP	2.15	3.58	1.82	1.85	1.42	2.58	2.9	3.35	2.79	3.19	2.57	2.17	2.02	2.68	2.95	2.95	3.07	2.15	3.36	2.15	2.49	2.82	2.34	2.39	2.85	1.92	2.08	3.64	3.81	1.83	1.58	3.56	3.55	2.31	3.16	3.51	4.47	2.36	1.73	2.07	2.2	3.04	1.63	4.96	2.87	2.15	1.26	1.58	3.89
APITD1	0.453	0.885	0.414	0.399	0.373	0.405	0.72	0.642	0.572	0.547	0.803	0.601	0.375	0.642	0.624	0.676	0.483	0.585	0.543	0.486	0.617	0.402	0.617	0.477	0.493	0.463	0.295	0.636	0.683	0.469	0.553	1.1	0.583	0.728	0.549	0.666	0.737	0.606	0.596	0.277	0.329	0.723	0.565	0.675	0.475	0.514	0.666	0.702	0.993
APITD1-CORT	0.435	0.701	0.307	0.336	0.358	0.409	0.469	0.559	0.512	0.472	0.575	0.52	0.306	0.698	0.528	0.588	0.415	0.686	0.453	0.397	0.405	0.301	0.565	0.357	0.347	0.543	0.274	0.408	0.667	0.506	0.395	0.691	0.477	0.832	0.467	0.64	0.552	0.496	0.397	0.249	0.359	0.568	0.41	0.449	0.423	0.494	0.597	0.683	0.751
APLF	0.291	0.658	0.277	0.295	0.164	0.245	0.461	0.385	0.368	0.575	0.486	0.359	0.314	0.381	0.337	0.323	0.519	0.331	0.257	0.376	0.0659	0.318	0.661	0.372	0.426	0.301	0.345	0.63	0.489	0.308	0.459	0.501	0.275	0.278	0.297	0.442	0.515	0.334	0.366	0.333	0.403	0.483	0.333	0.523	0.367	0.344	0.381	0.487	0.343
APLN	0	0	0	0.0176	0.00784	0	0	0	0.00383	0.00473	0	0.0118	0	0	0	0.00419	0.00508	0.0084	0	0.00286	0.00605	0	0.00286	0.00347	0	0	0	0.00284	0.00649	0.00484	0.0139	0.00604	0.0146	0	0.0159	0.00901	0	0.00379	0.0045	0.00509	0.0105	0	0	0.00646	0	0.00945	0.00989	0.00985	0
APLNR	0	0	0	0.00977	0.013	0.00496	0	0	0	0	0.00574	0.00654	0	0	0	0.00348	0.00422	0	0	0.00238	0	0.00578	0	0	0	0	0	0.00236	0.00809	0.00403	0.00386	0	0.0121	0	0	0	0.00457	0	0	0.00423	0	0	0.00282	0	0.00694	0	0.00274	0	0
APLP1	0.0532	0.192	0.078	0.0773	0.175	0.0628	0.0585	0.0807	0.0554	0.0561	0.0727	0.0776	0.0529	0.123	0.099	0.0386	0.0468	0.144	0.143	0.079	0.175	0.0549	0.0678	0.0548	0.0788	0.0437	0.0678	0.056	0.0768	0.0637	0.0979	0.0636	0.221	0.0778	0.0906	0.0474	0.0723	0.0549	0.118	0.0737	0.0619	0.0829	0.147	0.0468	0.0714	0.0933	0.0477	0.0583	0.0974
APLP2	99.1	91.7	127	96.7	179	102	56.3	58.6	71.9	119	55.2	68.1	72.4	105	59.8	57.1	88.7	221	53	70.8	165	144	53.2	83.3	55.8	134	153	63	97.4	65	92	44.4	134	81.4	83	45.2	63.9	93	63.4	156	151	97	98.1	68.1	112	117	93.3	49	58.9
APOA1	0.0871	0.0657	0.125	0.127	0.141	0.0857	0.184	0.0551	0.151	0.153	0.0744	0.127	0.168	0.118	0.27	0.166	0.11	0.362	0.26	0.195	0.326	0.0875	0.144	0.237	0.0538	0.0239	0.0463	0.0204	0.105	0.139	0.1	0.0652	0.184	0.106	0.114	0.0972	0.079	0.341	0.0324	0.0366	0.094	0.0905	0.159	0.0813	0.135	0.102	0.0355	0.0708	0.196
APOA1BP	14.7	14.8	14.7	9.8	13.2	9.96	13.7	13.3	10.8	14.1	18.8	17.3	22.2	27	16.2	17.4	15.7	12.8	20.3	19.5	30.5	12.4	13.6	11.6	12.7	9.35	8.32	18.1	13.9	15.5	18.2	19.7	27.6	13.3	9.64	15.3	15.6	21.5	17.2	8.43	8.98	14.3	17.1	16.6	10	17.8	13.3	17.4	20.7
APOA2	0.385	0.934	0.594	0.32	0.694	0.569	0.373	0.279	0.156	0.645	0.423	0.107	0.0913	0.0747	0.905	0.0856	0.242	0.229	0.411	0.253	0.0825	0.308	0.41	0.307	0.286	0.634	0.878	0.406	0.155	0.165	0.348	0.535	0.199	0.101	1.01	0.522	0.393	0.155	0.552	0.59	0.606	0.378	0.208	0.353	0.626	0.386	0.382	1.01	0.319
APOA4	0.0357	0.0202	0.0154	0	0	0	0	0.0113	0.00845	0.0105	0	0.00868	0.0296	0.0121	0	0	0	0	0.0399	0	0	0.00768	0	0.00766	0.0132	0	0	0	0.00716	0.0107	0.0205	0	0.0161	0.0163	0	0.00995	0.00607	0	0.0199	0	0.0115	0.00556	0.0225	0.00714	0.0369	0.0104	0.00728	0	0
APOA5	0.0135	0	0	0.00981	0	0	0	0	0	0	0	0	0	0	0	0	0	0	0	0	0	0.0058	0	0	0	0	0	0	0	0.00808	0	0	0	0	0.00884	0	0	0	0.00751	0	0.00873	0	0	0	0.00697	0.00788	0	0	0
APOB	0	0	0	0	0.00179	0	0	0.00117	0	0	0	0	0	0	0	0	0	0	0	0.000653	0	0.000794	0	0	0	0	0	0	0	0	0	0	0	0	0	0.00103	0	0	0	0	0	0	0	0	0	0	0	0	0
APOBEC1	0.0584	0.033	0.0126	0.0425	0.0283	0	0	0.0739	0	0.0171	0	0	0	0	0.016	0.0151	0	0.0911	0.0218	0.0207	0.0875	0.0251	0	0.1	0	0.0721	0.0466	0.0205	0.0352	0	0.0336	0.0437	0.0264	0	0.0383	0	0.0298	0.0274	0.0163	0.092	0	0.0182	0.0368	0.0117	0.0302	0.0512	0.0715	0.0178	0
APOBEC2	0.335	0.559	0.206	0.348	0.17	0.612	0.256	0.313	0.34	0.28	0.293	0.233	0.198	0.205	0.463	0.331	0.371	0.133	0.44	0.231	0.382	0.206	0.378	0.322	0.384	0.302	0.318	0.369	0.365	0.401	0.312	0.203	0.374	0.262	0.282	0.338	0.385	0.135	0.258	0.291	0.268	0.249	0.161	0.274	0.42	0.28	0.241	0.253	0.292
APOBEC3A	135	245	62.4	158	157	181	79.9	89.4	107	75.1	54	58.9	61.2	58	67.2	40.8	66.1	197	76.9	42.2	63.7	95.2	63.6	141	76.6	152	286	27.9	65.6	56.9	78.6	175	168	242	313	103	88.3	124	156	325	275	142	138	108	181	173	100	102	117
APOBEC3B	9.34	1.65	4.21	0.271	0.494	0.375	0.768	6.36	0.217	6.14	0.138	0.223	0.52	0.161	0.334	2.58	4.73	0.688	0.278	0.48	0.648	0.226	0.168	0.553	4.31	0.795	0.365	0.351	0.286	3.7	1.6	1.19	1.79	0.791	0.8	6.61	0.456	0.342	0.472	0.427	18.8	1.75	0.756	7.56	0.245	0.744	1.71	0.31	2.52
APOBEC3C	29.5	29.3	28.7	16.8	25.8	14.9	27.3	21.7	15.2	18.9	27.2	25.4	32.3	27	27.6	26.4	25	23.8	41.4	34.7	29.4	23	24.2	26.7	18.3	17.1	15.2	22.3	19	37.1	41.9	36.6	30.6	38.3	19.6	24.1	23.9	30.8	29.2	24.2	22.3	26.1	39	22.8	25	40.8	38.7	18.7	39.7
APOBEC3D	6.32	4.84	5.4	3.81	3.94	3.44	6.85	5.27	4.83	3.17	6.57	4.87	6.75	4.15	4.82	5.77	4.4	2.52	8.2	6.26	4.47	3.55	5.92	5.71	5.59	3.12	2.59	5.25	3.56	7.47	6.78	7.61	5.19	6.83	5.8	6.47	4.62	7.14	6.79	4.03	4.12	6.75	6.4	5.81	5.36	5.9	6.79	4.92	9.94
APOBEC3F	2.65	2.73	2.25	1.16	1.27	1.12	2.42	1.56	1.35	1.23	2.06	1.54	2.42	1.72	1.74	1.61	1.79	1.08	2.17	2.07	2.15	1.54	1.63	1.35	1.36	1.19	1.07	2.37	1.54	2.77	2.81	3.03	3.51	3	3.49	2.41	1.82	2.25	2.15	2.26	2.72	2.91	3.4	2.57	2.13	3.44	2.69	1.83	3.56
APOBEC3G	35	34	25	17.6	28.9	15.9	32.1	28.2	18.1	16.7	28.4	22.8	34.8	19.1	18.6	24.2	28	15	47.3	20.9	24.5	20.9	21.6	29.6	16.9	16	16.5	24.5	19.6	39.2	35.7	48.4	47.1	55.3	29.5	27.5	23.7	23.5	36.5	30.1	32.5	30	36	35.6	33.4	43.2	31.8	20.2	46.1
APOBEC3H	2.92	2.94	1.61	2.32	3.27	2.2	3.48	2.54	1.93	1.26	3.1	1.82	4.02	1.3	1.34	1.95	2.36	1.18	6.71	1.81	3.36	1.46	2.4	4.4	1.06	0.9	0.981	1.62	0.796	4.9	3.64	12.6	4.49	4.48	2.2	1.96	2.15	2.12	3.69	1.49	2.3	1.65	3.51	3.2	3.01	5.93	3.84	1.35	6.85
APOBEC4	0.075	0.0318	0.0283	0.0341	0.0273	0.0208	0.00793	0.0119	0.00444	0.011	0.012	0.0274	0.0466	0.00636	0.0154	0.00486	0.0236	0.0682	0.028	0.0166	0.0351	0.0686	0.00664	0.0241	0.0104	0.1	0.0673	0.0296	0.015	0.0112	0.0162	0.021	0.00847	0.0428	0.0492	0.0105	0.00956	0.0176	0.00522	0.0473	0.0607	0.0175	0.0158	0.0113	0.0194	0	0.0153	0.00571	0.00904
APOBR	201	190	94.5	134	273	145	56.5	75.7	70.8	94	47.4	65.6	94.4	130	65.7	57.3	97.6	336	75.7	70.2	197	135	44.7	108	85.3	126	168	36.7	70.5	70.8	60.6	88.9	240	159	163	55.1	44.5	107	116	190	247	64.3	128	77.7	102	173	91.7	76.5	81.3
APOC1	0	0	0	0	0	0	0	0	0.0268	0	0.0241	0.0275	0.0468	0.115	0.031	0.146	0	0.0588	0.0843	0	0.0846	0	0.08	0.097	0.0209	0.139	0	0.0595	0.0454	0	0.0325	0.169	0.459	0.0517	0.0741	0.063	0.0384	0.0265	0.0315	0.0356	0	0.159	0.0475	0.0678	0.0876	0.0661	0.0922	0.103	0.136
APOC1P1	0	0	0.0359	0	0	0	0.0117	0	0	0	0	0	0	0	0	0	0	0	0	0	0	0	0	0	0	0	0	0.0195	0	0	0	0	0.0251	0	0	0	0	0	0.0155	0	0	0	0	0	0	0	0	0	0
APOC2	0.0357	0.0404	0.0154	0.026	0.0347	0	0.0302	0.0452	0.0846	0.0209	0.061	0.0522	0.0888	0	0.0196	0.037	0.0225	0.0372	0.0533	0	0.0535	0	0.114	0.092	0.106	0	0.0285	0.0251	0.0143	0.0428	0	0.0267	0.0969	0.0327	0	0.0598	0.0729	0.0503	0.0796	0	0.0231	0.0557	0.0451	0.0286	0.0554	0.0209	0.0583	0.0218	0.0172
APOC3	0	0	0	0	0	0.0721	0	0	0	0	0.0209	0	0	0	0	0	0	0	0	0	0	0	0	0	0	0	0	0	0	0	0	0	0	0	0	0	0	0	0	0	0	0	0.0205	0	0	0	0	0	0
APOC4	0.0424	0	0	0	0	0.0313	0	0	0	0	0	0	0	0.0287	0	0.11	0	0	0.0632	0.015	0	0.0182	0.045	0.0182	0.0471	0.0349	0.0338	0	0.017	0.0254	0.0244	0	0	0.0387	0	0.0473	0.0144	0	0	0	0	0.0396	0	0.0339	0.0219	0	0	0	0
APOC4-APOC2	0.0285	0.0161	0.00614	0.0104	0.0138	0.0105	0.0121	0.018	0.0337	0.00834	0.0243	0.0208	0.0354	0.00966	0.0156	0.0886	0.00895	0.0148	0.0531	0.00504	0.0213	0.00613	0.0605	0.0428	0.0633	0.0117	0.0341	0.01	0.0171	0.0256	0.00819	0.0107	0.0386	0.026	0.00934	0.0397	0.0339	0.0201	0.0317	0.00898	0.00922	0.04	0.018	0.0285	0.0294	0.00833	0.0232	0.0174	0.00687
APOD	0	0.0261	0.0696	0.0168	0.0447	0	0	0.0729	0.0218	0	0.00984	0.0449	0.0573	0	0	0.0119	0.0145	0.024	0	0.114	0	0.0397	0.0245	0	0	0.019	0.0551	0.0243	0.037	0.0276	0.053	0.0345	0.0417	0.0211	0.0302	0.0643	0.0235	0.119	0.154	0	0	0.0791	0.0194	0	0.0238	0	0.0282	0.0281	0
APOE	0.0441	0.15	0.0667	0.112	0.0642	0.0489	0.0934	0.0559	0.167	0.0905	0.151	0.0537	0.165	0.0898	0.0967	0.195	0.0694	0.0459	0.148	0.133	0.0827	0.0475	0.0625	0.104	0.123	0.0908	0.0528	0.0387	0.115	0.0794	0.0889	0.116	0.12	0.202	0.0434	0.0862	0.0676	0.0726	0.148	0.0556	0.0143	0.103	0.0464	0.0795	0.0799	0.0774	0.063	0.121	0.0426
APOF	0.0154	0.0698	0	0.0561	0	0.0114	0.0326	0.00976	0.0438	0.0271	0.0527	0.03	0.0128	0.0105	0.0338	0.04	0.0097	0	0.0575	0.0218	0.0808	0.0266	0.071	0.0397	0.0457	0.0508	0.0369	0.0325	0.0619	0.00924	0.00887	0.0692	0	0.0141	0.0202	0.0172	0.0367	0.0507	0	0.0486	0.02	0.024	0.0259	0.0802	0.00797	0.0271	0.0189	0.0282	0.0893
APOH	0.0217	0	0	0	0.021	0	0.00918	0	0	0	0.00926	0	0	0	0	0.0112	0	0	0	0	0	0	0.00768	0	0	0	0	0	0	0	0	0.0162	0	0	0	0	0	0	0	0	0.014	0	0	0.00868	0.0112	0	0	0	0
APOL1	34	33.5	27.5	11.9	29.4	10.5	27.1	9.57	7.77	13.4	10.6	9.21	22.6	22.8	11.4	9.97	19.4	16.2	21.7	11.2	26.1	18.6	10.1	15.9	16.1	9.49	22.4	8.63	19.3	19.8	23.4	28.1	49.5	72	49.2	22.2	11.8	21.9	29.1	51.6	44.9	23.1	27.8	21	41	38.3	17.3	13.7	37.5
APOL2	82	69	55.7	36.6	88.6	43.6	65.3	37.5	30.1	25.5	35.9	37.8	54.2	47.8	36.4	28.8	61.3	46.3	63.7	32.2	76.8	51.9	27.3	42.1	44.7	44.4	71.4	22.3	32	48.2	41.7	71	117	179	96.3	53.3	26.8	62	78	115	98.5	43.7	53	46.2	78	54.8	44.3	39.3	62.7
APOL3	17.8	20.6	20.4	10.4	14.5	9.82	22.4	12.5	11.7	23.9	24.5	15.7	25.9	25.5	15.9	16.5	21.6	13.4	27.6	25	18.5	14.3	17.8	15.6	17.4	8.47	9.65	19	23	22.8	23.8	21.9	30.3	24.3	12.6	23.5	21.2	18.4	22.5	11.6	15.8	16.8	22.5	22.1	15.8	20.2	14.1	22.2	40.4
APOL4	0.252	0.414	0.642	0.25	0.192	0.124	1.16	0.405	0.213	0.407	0.274	0.215	0.676	0.212	0.221	0.202	0.494	0.206	0.831	0.146	0.308	0.322	0.17	0.216	0.105	0.0816	0.255	0.0884	0.217	0.393	0.496	0.844	0.269	0.746	0.19	0.447	0.205	0.143	0.476	0.264	0.232	0.183	0.43	0.5	0.414	0.357	0.193	0.232	1.52
APOL5	0.0181	0	0	0	0	0	0	0	0.0172	0	0.00774	0	0.03	0	0	0	0	0	0	0	0	0	0	0	0	0	0.0144	0	0	0.0217	0.0104	0.0135	0	0.0166	0.0119	0.0101	0.00616	0.00851	0.0101	0.0342	0.0586	0.00565	0.0152	0.00725	0	0.0106	0	0.011	0
APOL6	18.2	23.5	12.4	8.84	13.1	6.23	18.4	7.67	7.32	10	8.17	6.29	10.9	7.59	7.06	6.52	10	4.37	12.6	6.91	7.34	9.65	7.02	9.24	9.8	3.91	11.7	9.17	16.1	19.7	17.9	25.3	22	36.3	60.3	20.9	15.1	11.2	14.9	56.9	31.2	23.9	15	17.3	35.3	32	17.3	10.7	29.8
APOLD1	0.351	0.299	0.121	0.605	0.251	0.51	0.212	0.379	0.261	0.25	0.18	0.176	0.183	0.212	0.177	0.235	0.238	0.258	0.165	0.231	0.251	0.351	0.159	0.134	0.3	0.235	0.263	0.277	0.147	0.233	0.475	0.238	0.41	0.266	0.421	0.307	0.198	0.233	0.144	0.408	0.321	0.252	0.172	0.298	0.159	0.382	0.216	0.197	0.156
APOM	6.3	5.34	7.75	5.35	8.64	5.28	4.43	4.06	3.93	4.53	4.91	5.33	5.95	5.63	5.6	5.59	5.94	7.23	5.38	6.83	5.64	7.1	4.81	4.8	4.43	5.3	6.37	4.38	5.4	4.99	6.67	4.39	4.89	6.02	4.79	4.41	4.49	5.05	5.1	4.83	5.48	5.21	5.49	4.19	4.93	4.32	5.81	5.37	4.35
APOO	1.75	2.37	1.46	1.17	1.54	1.24	1.49	1.75	1.31	1.38	1.82	1.89	2.16	2.38	1.37	1.45	2.36	2.09	1.88	1.37	2.56	1.07	1.5	1.23	1.52	1.77	1.32	1.71	1.57	1.15	1.99	2.95	3.23	1.46	1.45	1.94	1.59	2.04	1.89	1.06	1.18	1.84	1.44	1.93	1.05	1.83	1.7	2.28	2.26
APOOL	0.797	0.783	0.945	0.63	0.547	0.749	1.05	0.861	0.826	0.953	0.951	0.933	0.851	0.847	0.953	0.941	0.896	0.678	0.541	1.05	0.603	0.927	1.03	0.928	0.885	0.815	0.713	1.57	1.17	1.13	1.29	0.855	0.633	0.53	0.9	0.98	1.28	0.825	0.673	0.733	0.912	1.17	0.875	1.13	0.891	1.26	1.05	1.06	1.18
APOPT1	6.71	8.44	5.04	6.7	6.89	5.74	6.86	6.88	6.21	7.18	7.08	7.41	8.22	8.45	6.44	7.47	7.19	7	7.71	5.51	8.45	5.44	5.55	6.18	5.32	6.21	5.6	6.65	6.1	4.97	5.8	7.75	9.26	6.54	4.95	6.14	6.38	6.14	5.5	4.21	4.33	6.72	6.59	6.78	5.45	6.3	5	6.25	8.35
APP	13.6	8.21	16.2	8.41	20.7	8.51	6.95	3.52	6.76	21.7	6.26	9.37	8.37	13.1	9.11	7.05	11.3	23.8	5.93	12.4	19.9	14.1	7.37	6.73	7.07	13.5	8.79	12	18.2	8.95	13.7	6.41	10.3	6.03	9.86	5.71	9.57	9.6	8.85	15.2	15.9	11.3	15	7.97	11.5	10.3	16.2	6.21	5.85
APPBP2	3.19	3.79	3.04	4.21	3.48	5.12	3.78	3.51	4.08	4.13	3.18	3.13	2.36	2.16	3.43	3.17	3.01	3.14	2.57	2.99	2.03	3.98	3.86	4.28	3.64	4.1	5.47	4.39	3.91	3.7	3.32	3.24	3.21	3.92	4.89	4.03	4.02	2.75	2.91	6.07	5.56	4.51	2.77	4.07	4.34	3.54	3.63	3.51	3.65
APPL1	3.01	3.07	2.96	2.88	2.18	3.44	4.15	3.19	3.69	4.19	3.5	3.86	2.94	2.4	3.58	3.11	3	2.56	2.71	3.46	2.41	3.9	4.17	3.46	3.81	3.79	2.83	6.29	5.03	4.86	4.31	2.73	3.03	2.3	4.4	3.54	4.7	2.37	2.84	5	3.66	5.45	3.03	4.04	4.76	4.41	5.21	3.13	3.31
APPL2	7.52	9.14	8.89	13.2	12	14.8	7.82	9.49	13.6	8.58	7.85	8.21	5.97	5.62	9.22	7.58	9.16	9.31	6.14	6.47	6.53	9.36	8.76	10.8	9.67	14	21.3	7.78	6.96	7.17	6.84	6.83	5.54	11.2	12.9	8.16	6.22	6.62	9.19	13.6	13.8	8.73	7.92	7.21	10.3	6.14	7.71	7.3	5.41
APRT	69.6	69.7	80.4	62.3	59.7	52	65	73.4	56.8	86.6	97	100	115	168	88.6	112	84.4	71	103	114	121	68.1	85.5	59.4	72.1	34.7	41.3	73.3	76.4	77.3	84.2	101	143	66.5	44	78.4	77.7	113	90.3	40.8	42.1	68.6	83.2	82.1	46	50.3	44.7	89.3	81.5
APTX	4.31	4.79	3.62	3.16	3.21	4	4.17	3.88	3.74	4.54	4.65	4.63	4.82	5.54	4.32	4.14	4.18	4.21	4.46	4.38	4.89	3.87	4.21	4.07	3.25	3.47	3.33	5.11	4.67	4.16	4.59	4.49	6.11	4.03	3.59	4.54	5.44	5.04	4.64	3.26	3.09	4.83	4.08	5.43	3.29	4.66	3.87	4.13	5.39
AQP1	2	5.98	0.354	0.95	1.04	0.715	0.34	0.348	0.292	0.51	0.621	1.23	1.42	1.31	0.558	0.983	0.749	2.49	1.24	0.264	0.48	0.3	0.154	0.254	0.441	2.37	0.498	0.187	0.343	0.443	0.335	0.663	0.712	0.901	0.904	0.394	0.257	0.251	0.75	0.254	0.781	0.0845	0.29	0.141	0.9	0.394	0.409	0.906	0.765
AQP10	6.4	0.905	2.55	1.88	4.39	0.333	0.215	1.11	0.441	0.673	1.29	1.2	1.16	1.93	0.9	0.181	2.62	4.81	0.51	0.906	3.72	1.11	0.814	0.743	1.07	1.56	1.53	0.47	0.765	0.715	0.619	3.73	1.77	0.944	2.76	0.227	0.198	0.546	1.35	1.78	1.65	0.15	1.31	0.198	1.2	0.629	1.5	4.41	0.161
AQP11	0.278	0.233	0.381	0.308	0.211	0.348	0.312	0.413	0.43	0.248	0.424	0.247	0.411	0.246	0.437	0.47	0.357	0.252	0.451	0.475	0.163	0.286	0.553	0.384	0.265	0.299	0.26	0.37	0.355	0.247	0.292	0.253	0.0874	0.276	0.42	0.297	0.288	0.347	0.236	0.206	0.204	0.343	0.305	0.261	0.3	0.134	0.37	0.346	0.327
AQP12A	0.024	0	0	0.0175	0.0932	0	0.0203	0.0152	0.0114	0.0141	0.0308	0	0	0	0.0263	0	0	0	0.0179	0	0.018	0.0207	0.00851	0.0206	0.00891	0	0.0192	0	0.00965	0.0144	0.0276	0.018	0.0217	0	0.0158	0	0.00817	0	0.0134	0	0	0	0	0	0	0	0.0098	0.0146	0
AQP12B	0	0	0	0	0	0	0	0	0	0	0	0	0	0	0	0	0	0	0	0	0	0	0	0	0	0	0	0	0	0	0	0	0	0	0	0	0	0	0	0	0	0	0	0	0	0	0	0	0
AQP2	0	0	0	0	0	0	0.00264	0	0.00295	0	0	0	0.00517	0	0	0	0	0	0.00465	0	0	0	0.00221	0.00535	0	0	0	0	0.005	0	0.00717	0	0	0.0057	0.0123	0.00348	0	0	0	0	0	0	0.0105	0	0.00644	0	0.00254	0.0076	0
AQP3	16.5	19.3	22.1	13.6	14	12.4	30.1	16.3	15.9	16.7	25.6	25.4	19.1	32	31.3	30.7	20.9	13.9	12.7	44.9	25.6	16.9	30.6	9.06	26.1	16.3	10.4	30.7	23	21.4	34.6	29	24.3	11.3	16.6	26.3	27.5	36.5	25.2	10.5	27.2	31.9	21.7	22.4	12.6	10.4	28.8	26	27.5
AQP4	0	0	0	0	0	0	0	0	0.00236	0	0	0	0	0	0	0	0	0	0.00372	0	0	0	0	0	0	0	0	0	0	0	0	0	0	0.00456	0	0	0	0	0	0	0	0	0	0	0	0	0	0	0
AQP5	0	0	0	0	0	0	0	0	0	0	0	0	0	0	0	0	0	0	0	0	0	0	0	0	0	0	0	0	0	0	0	0	0	0	0	0	0	0	0	0	0	0	0	0	0	0	0	0	0
AQP6	0	0	0.00423	0.00714	0	0.0145	0	0	0	0	0	0.0191	0	0	0.00538	0	0.0123	0	0	0	0.0294	0	0.00348	0	0	0	0	0.00345	0	0	0	0	0.00887	0	0.0193	0.00548	0.00334	0	0	0	0	0.00918	0	0.00785	0	0	0	0.00598	0
AQP7	0	0.0235	0.0447	0.0151	0	0.0306	0.0614	0.0131	0.00982	0.0365	0.062	0.0101	0.0172	0.0422	0.0454	0.0322	0.0261	0	0	0.0807	0.0155	0.0179	0.103	0.0178	0.0615	0.0512	0.0496	0.0728	0.0166	0.0373	0.0477	0.0155	0.0375	0	0.0272	0.0231	0.0494	0.117	0.0231	0.0131	0	0.0711	0.0523	0.108	0.0214	0.0121	0.0423	0.0379	0.01
AQP7P1	0	0	0	0	0	0	0	0	0	0	0	0	0	0	0	0	0.00515	0	0	0	0	0	0	0	0.00304	0	0	0	0	0	0.00471	0	0.0074	0.00749	0	0	0	0	0	0	0	0	0.00344	0.00328	0	0	0	0	0
AQP7P3	0.0491	0	0	0.107	0	0.0363	0	0	0.0233	0	0	0	0	0	0	0	0	0.0511	0	0	0.0368	0	0	0	0	0	0	0	0	0.0589	0.0283	0	0	0.0449	0.0644	0	0	0.0231	0	0.0619	0	0	0	0.0197	0	0	0.02	0	0
AQP8	0.0597	0	0	0.029	0	0.0147	0.0253	0.0756	0.0377	0.0583	0.034	0.0291	0.0495	0.027	0.0109	0.031	0.0376	0.0414	0.0297	0	0	0.0257	0	0.0855	0.0221	0.0492	0	0.0629	0.032	0.0239	0.0229	0	0.09	0	0.0261	0.0444	0.0813	0	0.0444	0.0251	0.0387	0.0186	0.0167	0.0319	0.0309	0.128	0.0162	0.0121	0.048
AQP9	437	422	320	527	758	709	251	323	309	262	117	270	247	254	273	183	421	939	124	160	275	406	184	393	295	904	1020	85.2	150	180	160	251	224	537	554	186	91	298	344	811	624	137	239	177	398	377	282	214	156
AQPEP	0.0113	0.0829	0	0.0041	0.0328	0.00832	0.00477	0.0392	0.0187	0.0198	0.00963	0	0.028	0.00765	0.00926	0.00877	0.0142	0.0176	0.0126	0	0.00422	0.0194	0.018	0.0145	0.0125	0.0139	0.00899	0.00594	0.0181	0.00338	0.00973	0.00422	0.00509	0.0206	0.0222	0.00943	0.0115	0.00529	0.00314	0.0142	0.0073	0.0141	0.00948	0.0135	0.00583	0.0165	0.0115	0.0103	0.0109
AQR	4.44	4.4	6.67	4.67	6.23	4.59	5.5	5.34	4.32	5.57	4.86	5.37	4.5	4.97	5.37	4.69	5.98	5.93	4.59	6.48	5.92	7.59	5.27	4.98	4.93	5.03	5.43	6.79	7.07	5.97	6.98	3.74	5.24	4.03	5.42	5.76	5.32	4.83	5.24	6.84	6.86	6.73	6.44	4.67	7.04	4.79	6.7	5.05	4.75
AR	0.0232	0	0	0.00421	0	0.0128	0	0	0.00274	0.00679	0.0099	0.00564	0	0.00393	0.00635	0	0.00364	0.012	0.00864	0.00615	0.00434	0.00499	0.0205	0.00249	0.0215	0	0.00462	0.00814	0.00698	0.0104	0.00667	0.00433	0.00523	0	0	0.0097	0.00591	0.00272	0.00323	0	0.00375	0.00181	0.0244	0.00464	0.00599	0.00339	0	0	0.00279
ARAF	33.6	28.7	32.9	27.5	40.3	26.6	21.1	21.9	21.2	25.3	26.6	27.2	34.6	40.7	26.6	25.4	30.4	51.9	27	30.8	47	30.5	20.5	24.9	23.8	32.1	30.7	19.5	21.1	25.2	26	25.2	37.5	30.6	20	20.8	20.6	36.9	31.4	27.3	26.3	20.5	31.1	24.2	24	29.3	22.9	25.1	24.8
ARAP1	130	192	133	162	234	152	130	108	99.3	94.9	72.4	97.7	107	121	155	81.8	126	217	94.9	93.5	157	143	75.8	115	111	148	196	39.9	80.2	75.4	73	80	125	141	103	67.6	52	131	135	162	180	68.5	108	59.7	119	84.1	90.7	90.1	55.4
ARAP1-AS2	17	25.2	16.2	24.8	29.4	22.7	16.5	14.4	14.4	11.8	10.4	14.1	13.4	14.2	22.6	11.1	15.6	25.5	14.6	13.3	12.3	19.7	11.2	16.8	16.8	21.9	24.6	4.13	10.4	11.2	9.42	10	8.32	20	15.7	9.39	7.94	12.7	14.8	21	24.7	8.76	15.2	7.51	17.4	10.6	12.6	12.8	6.6
ARAP2	4.02	3.83	3.95	4.83	3.07	5.13	5.78	5.86	5.78	5.5	4.7	3.95	3.64	1.72	3.67	3.15	3.64	2.07	6.47	3.33	1.41	5.04	4.87	8	4.58	2.73	5.27	6.12	4.47	8.65	4.67	4.73	3	6.17	5.37	5.78	6.48	2.34	3.83	6.58	4.53	6.38	3.58	5.42	9.83	4.7	5.78	3.09	5.78
ARAP3	26.1	32.8	33.5	51.6	66.7	41.2	15.1	24.4	29.4	21.9	15.4	22.5	15	24.9	26.2	18.2	26.1	59.9	20.5	15.1	31.9	40.5	16.9	35.2	32.3	38.2	61.7	7.1	16.4	12	13.7	15	23.2	33.3	30.8	12.9	6.62	33.9	34.2	34.8	49	16.4	19.1	12.2	30	16.1	12	18.4	7.62
ARC	0.0354	0.02	0.0649	0.0451	0.00859	0.00653	0.0786	0.0336	0.0335	0.057	0.0113	0.116	0.0147	0.03	0.0436	0.0367	0.0167	0.0276	0.0792	0.0532	0.0928	0.0191	0.0251	0.038	0.0131	0.0364	0.0212	0.028	0.0284	0.0849	0.112	0.0265	0.016	0.0405	0.0174	0.0395	0.141	0.0748	0.00986	0.0223	0.0286	0.0442	0.126	0.135	0.0274	0.114	0.101	0.0162	0.0982
ARCN1	25.2	20.7	29.4	23.3	42.5	23	22.9	18.8	14.9	23.1	17.5	21.1	24.2	27.2	21.3	20	29.6	36.7	16	28.7	29.8	32.6	18.9	20.4	20.4	31.9	35.1	24.2	26.7	22.6	30.9	17.7	24.6	26	22.7	18.3	18.1	24.6	25.7	39.2	37.7	25.4	28	17.9	23.6	23.6	28.9	18.9	22.6
AREG	0	0	0	0.0306	0	0.0311	0	0	0.0199	0	0.018	0	0	0	0	0	0.0132	0.0219	0.0157	0	0.0315	0.00906	0	0	0	0	0.0503	0	0.00845	0	0	0	0	0	0	0	0	0	0	0	0.0136	0	0	0	0	0	0	0	0.0101
AREGB	0	0	0	0	0	0	0	0	0	0	0	0	0	0	0	0	0	0	0	0	0	0	0	0	0	0	0	0	0	0	0	0	0	0	0	0	0	0	0	0	0	0	0	0	0	0	0	0	0
ARF1	204	191	183	222	316	173	107	151	121	131	125	158	189	194	154	143	207	287	143	163	276	203	119	134	125	239	253	84.3	140	118	138	161	204	247	132	108	105	177	182	212	192	108	154	116	128	147	140	136	123
ARF3	50.2	34.4	74.6	48.3	87.4	45.1	30.6	35.1	30.8	41.1	31.3	44.9	53.1	57.7	41.2	33.4	59.7	96.8	34.1	47.4	76.9	73.7	32.3	39.6	34	59.9	73.7	31.7	37.5	39.2	43.8	33.9	46.2	63	33.8	28.2	28.3	45.2	46.9	64.5	54.5	30.7	47.1	33.6	42.4	41.9	44.9	34.1	34
ARF4	30.8	52.3	37	29.5	46.3	33.3	30.6	41.9	25.4	31.5	26.7	32.7	31.8	30.7	36.2	29	42.6	45.2	24.6	31.4	41.5	34.6	27	34.3	25	39.8	52.9	29.4	29.8	24.5	37	41.5	42.4	41.4	27.2	29.5	28	34.5	34.8	40	37.7	33.9	31.7	31.7	27.4	30.2	32.7	35.1	34
ARF5	141	137	151	157	202	119	86.9	149	90.2	121	105	139	157	206	129	134	166	232	152	126	273	145	110	130	103	158	187	75.4	91.8	91.7	88.2	127	225	192	76.6	101	79.6	130	143	123	102	84.2	114	94.7	95.7	118	89.1	123	101
ARF6	18.8	14.8	15.9	20.7	24.1	15	16.6	14.4	14.1	17.8	15.6	18.5	17.1	16.9	16.3	16.6	19	16.3	22.3	18.3	20.1	17.8	16.7	16.2	16.1	16.3	16.7	17	17.6	19.4	18.5	16.6	20.5	17.8	14	14.6	17.8	15.3	16.8	21.1	19	18.5	19.7	16.7	17.1	19.8	18.5	15.4	17.7
ARFGAP1	24	22.2	23.9	25	27.7	21.7	20.3	25	20.6	21.5	24.9	24.9	31.1	31.4	23.3	28	23.2	30.8	37	26.9	35.5	22.5	22.3	23.1	22.3	23.3	23.9	15.6	20	23.8	19.7	22.8	34.1	28	18.5	23	19.5	31	26.3	18.3	20.7	20.1	29.6	22.5	21.2	26.6	19.9	27.4	22.8
ARFGAP2	34.8	25.3	41	28.7	45.2	26.5	28.9	31.1	26	31.7	34.9	36	44.6	46.5	33.6	34.4	39.3	47.1	34.2	41.3	62.4	36.7	29.7	28.7	29.3	35.4	34.4	30.7	32.8	31.2	33	28.4	45.7	36.6	23.6	28.1	28.9	46.1	36.8	31.7	27.9	25.7	40.7	30.8	26.1	34.5	31.7	28.7	32.7
ARFGAP3	13.4	12.1	13.3	15.8	17.3	22.5	14	12.1	10.3	15.6	11	15.3	11.5	11	13.2	10.6	17.3	23	10.5	13.1	14.3	15.1	12.5	16.1	15.3	27.4	25.5	11.6	13.3	13.3	12.5	10.2	11.4	11.3	16.1	9.5	9.86	13.4	14.1	20.8	16.7	13.7	12.9	10.9	14.9	11.2	14.2	10.4	11.5
ARFGEF1	8.13	9.02	8.69	10.5	12.7	11.1	7.78	8.87	8.84	9.99	6.98	7.9	6.33	6.49	8.19	7.18	10.1	10.7	5.99	7.96	5.59	12	9.62	10.2	9.03	11.9	15	10	10.4	8.86	9.19	5.43	7.37	9.36	10.2	8.25	8.22	6.81	7.68	16.5	14.4	9.27	7.61	7.12	13	8.51	9.56	8.86	6.27
ARFGEF2	1.81	1.68	2.69	2.42	1.5	2.25	3.1	2.62	2.92	3.32	2.84	2.53	1.54	1.58	2.39	2.53	2.1	1.41	2.23	2.3	1.12	2.8	3.38	2.67	3.09	2.22	1.87	4.71	3.72	3.79	3.65	2.24	1.41	1.53	2.87	3.36	3.81	1.62	1.6	3.01	2.95	4.29	2.71	3.08	3.92	2.61	3.81	2.47	2.32
ARFIP1	10.1	16.2	9.29	15.4	13.5	13.9	9	12.3	9.87	13.5	7.33	9.16	7.47	5.97	10.5	9.23	8.58	8.41	7.03	6.53	6.76	13.6	6.88	11.3	6.67	11.2	18.9	7.86	10	8.79	8.21	9.02	12.2	16.7	11.7	10.9	8.35	8.11	7.09	22.3	19.8	12.6	7.12	11.1	12.7	8.19	8.18	11.4	8.88
ARFIP2	4.66	4.93	5.01	4.4	5.33	4.53	5.23	4.71	4.14	5.42	5.81	5.45	6.56	7.44	5.44	5.72	5.24	5.35	6.84	6.32	6.5	4.81	4.82	4.57	5.22	4.5	4.07	5.6	4.96	5.37	5.64	5.57	6.85	4.9	3.8	5.55	4.63	6.89	6.06	3.83	4.17	5.27	5.78	5.23	4.1	5.24	4.89	6.49	5.85
ARFRP1	13	11.8	12.1	12	13	8.8	11.2	11.7	10	11.5	16	13.9	16.8	22.6	13	16.3	13	12.9	17.3	18.3	24.3	11.9	13	11.4	11.9	11.1	9.91	10.3	14.4	13.2	12.9	13.5	22.7	13.6	8.79	11.6	12.5	15.4	13.2	8.22	9.92	9.97	14.7	11.7	9.7	13.8	9.9	13.9	11.7
ARG1	6.74	37	1.71	125	72.5	66	1.6	24.9	30.7	10.5	2.08	8.02	1.99	3.04	1.78	1.25	8.45	81.8	5.1	1.44	12.1	15.1	0.851	20.3	3.65	90.2	89	2	5.24	1.38	0.871	2.11	3.04	91.2	17.5	1.19	7.65	6.99	7.71	23	13.8	2.29	1.93	3.02	4.77	10	10.4	5.61	1.77
ARG2	9.98	14.6	5.42	4.14	6.34	9.95	5.72	5.58	4.7	6.58	6.55	6.15	10.7	8.18	6.53	5.6	7.32	6.89	7.02	4.95	7.86	4.9	5.11	4.74	5.7	6.22	4.67	7.8	5.31	5.34	6.88	9.01	9.39	7.13	5.55	6.28	6	5.27	5.68	5.25	4.54	5.01	5.84	5.77	6.9	6.64	6.03	5.36	6.54
ARGFX	0	0	0	0	0.00998	0	0	0	0.00243	0	0	0	0	0.0105	0	0	0	0	0	0.00182	0.0154	0.00221	0.00364	0	0	0	0	0	0	0	0.00296	0	0	0	0	0	0	0	0.00859	0	0	0	0	0	0	0.00301	0.0021	0	0
ARGFXP2	0.0429	0.194	0.203	0.218	0.166	0.475	0.181	0.0814	0.335	0.176	0.165	0.146	0.107	0.0727	0.141	0.1	0.0404	0.111	0.224	0.152	0.0803	0.111	0.235	0.23	0.286	0.141	0.41	0.211	0.103	0.18	0.037	0.144	0.0775	0.137	0.604	0.311	0.248	0.0805	0.155	0.432	0.291	0.1	0.108	0.112	0.521	0.238	0.271	0.105	0.0827
ARGLU1	42.1	64.1	35.6	74.5	24.3	81.3	69.3	52.2	97.2	66.7	53.1	51.1	28.1	24	50.4	56.7	33	26.2	60	31.4	15.5	42.7	72.5	78.3	65.2	50.3	76.4	68.1	45.2	59.5	37.8	55.6	27.2	50.2	88.4	68.5	70.1	27.4	29.4	54.9	49.5	64.8	31.2	60.9	67.7	47.2	47.9	39.7	51.6
ARHGAP1	29.9	23.2	37.7	28.7	51.4	24.2	20.5	22.7	18.9	25.2	21.6	26.2	32.4	35.8	24.3	22.8	32.6	46.4	27.2	30.2	37.7	36.8	21.7	25.6	23.4	29.9	37.3	18.1	23.7	25.4	24.2	18.9	29.1	32.2	23.8	18.5	16.5	29.1	32.6	34.7	32.6	20.8	32	18.8	25.7	22.2	23.7	22.3	19.3
ARHGAP10	1.53	0.829	1.17	0.781	2.43	0.742	1.06	1.23	0.69	1.42	1.49	1.56	1.58	1.65	1.29	1.41	1.74	1.18	2.42	1.88	2.3	1.73	1.2	1.26	1.32	0.912	0.585	1.54	1.32	1.8	1.42	1.36	1.86	0.966	0.536	1.22	1.14	1.94	1.77	1.12	0.717	1.21	1.71	1.56	1.09	1.87	1.4	1	1.9
ARHGAP11A	0.35	0.626	0.287	0.338	0.288	0.33	0.371	0.401	0.419	0.34	0.223	0.338	0.415	0.204	0.318	0.209	0.175	0.212	0.416	0.269	0.252	0.322	0.278	0.245	0.208	0.2	0.205	0.297	0.375	0.464	0.716	0.606	0.524	0.482	0.319	0.25	0.696	0.2	0.377	0.324	0.39	0.978	0.292	0.571	0.183	0.417	0.692	0.289	0.664
ARHGAP11B	0.0768	0.0869	0.0331	0.0186	0.0248	0.0567	0.0325	0.0972	0.0849	0.045	0.0875	0.0374	0.0637	0	0.0421	0.0398	0.0161	0.0266	0	0.0453	0.0384	0.0551	0.0181	0.077	0.0665	0.0843	0	0.0719	0.0514	0.0153	0.0589	0.115	0	0.0468	0.0504	0.0572	0.0871	0.012	0.0285	0.0323	0.0995	0.0639	0.0431	0.082	0.0662	0.0749	0.157	0.0624	0.0494
ARHGAP12	1.77	2.76	2.23	2.72	1.32	3.7	3.68	3.17	4.15	3.04	3.41	2.49	1.72	0.978	2.74	2.72	2.13	0.896	3.09	1.89	0.734	3.25	4.12	3.39	3.3	2.58	4.04	3.9	3.08	3.22	2.41	2.78	1.31	1.95	3.36	3.03	3.23	1.29	1.83	3.78	2.23	3.06	1.87	3.11	3.55	1.88	2.78	1.89	2.2
ARHGAP15	53.3	50.4	41.1	53.7	74.6	63.8	38.4	69.1	33.1	35.7	41.2	51.4	42.4	53.5	49.5	38.2	77.5	95	23.2	37.6	70.6	44.1	43.4	40.7	50.5	64.9	95.2	45	40.3	29.9	39.5	40.9	54.2	45.6	42.7	45	35.1	57.8	73.4	63.8	56.8	33.5	37.2	38	38.6	37.2	38.5	60	40.3
ARHGAP17	11.8	7.82	15.1	8.68	11.1	8.24	12.2	7.37	7.89	10.7	9.86	11.1	14.2	11.2	10.9	10.4	12.1	10.6	10.9	14.1	15.5	13	9.86	7.65	8.56	9.33	7.65	12.5	12.4	13.5	16.2	7.07	12.7	11.4	13.1	9.65	10.4	12.6	12.8	14.8	11.8	13.5	16.1	11.6	12	10.6	15.9	9.29	12.1
ARHGAP18	2.79	3.97	2.52	2.53	4.04	2.25	2.63	3.05	2.26	2.66	2.11	2.97	1.99	2.47	2.72	2.5	2.79	1.88	1.69	2.61	2.17	3.26	2.53	3.13	2.65	3.34	3.82	3.82	2.81	2.86	3.58	3.87	2.04	2.91	3.6	2.58	3.45	2.07	2.42	5.2	3.8	3.23	3.2	3.24	3.66	3.4	3.9	2.76	2.9
ARHGAP19	6.8	7.89	7.5	15.5	16.9	12.5	5.32	9.42	11	5.96	4.97	5.99	6.29	4.61	6.29	5.5	8.35	10.2	4.09	4.83	7.4	10.8	5.93	8.99	5.64	15.9	18.4	4.38	6.34	4.76	4.76	5.36	4.03	12.3	9.54	5.48	3.8	5.12	5.63	12.8	9.63	5.45	5.24	4.6	9.89	6.28	9.11	4.27	4.65
ARHGAP19-SLIT1	2.8	2.58	3.36	7.89	5.41	7.38	2.44	3.64	6.31	2.55	1.93	2.7	1.85	0.867	2.69	2.33	2.64	2.35	1.44	1.95	0.59	5.21	3.39	4.06	3.13	6.79	8.09	2.23	3.37	2.5	2.03	2.27	0.356	4.78	5.89	2.68	2.41	1.18	1.81	7.77	5	2.6	1.99	2.05	6.02	2.91	4.9	1.56	1.74
ARHGAP20	0.00379	0	0.00327	0.00828	0.00368	0.014	0.00642	0	0.0413	0.0222	0.0275	0.0129	0.00629	0.00515	0.0312	0.0197	0.00477	0.00394	0.00566	0.0215	0.00568	0.00653	0.0255	0.0195	0.00843	0.0312	0.00605	0.0107	0.032	0.025	0.00218	0.00851	0	0.0104	0.00995	0.00635	0.00516	0.00178	0.00634	0.0191	0	0.00355	0.0128	0.00303	0.0255	0.00665	0.0247	0	0.00732
ARHGAP21	0.353	0.201	0.513	0.193	0.518	0.252	0.512	0.205	0.334	0.417	0.346	0.377	0.304	0.318	0.317	0.26	0.452	0.295	0.225	0.42	0.215	0.457	0.393	0.259	0.361	0.517	0.371	0.558	0.413	0.429	0.466	0.332	0.236	0.253	0.336	0.328	0.528	0.215	0.245	0.598	0.503	0.368	0.483	0.289	0.441	0.342	0.412	0.312	0.281
ARHGAP22	0.509	0.388	0.554	0.217	0.302	0.277	0.325	0.302	0.37	0.957	0.66	0.541	0.358	0.824	0.484	0.481	0.436	0.278	0.256	0.74	0.99	0.309	0.545	0.592	0.236	0.298	0.264	0.444	0.383	0.419	0.366	0.247	0.448	0.11	0.075	0.216	0.612	0.433	0.301	0.297	0.807	0.561	0.449	0.814	0.289	0.688	0.355	0.523	0.396
ARHGAP23	0.123	0.175	0.0818	0.0321	0.0257	0.0326	0.0392	0.0251	0.023	0.0879	0.0584	0.0536	0.0475	0.0838	0.0797	0.048	0.086	0.105	0.0691	0.0843	0.0628	0.0627	0.0469	0.0284	0.0556	0.0544	0.0211	0.0403	0.11	0.108	0.173	0.099	0.175	0.0564	0.0694	0.064	0.1	0.058	0.0786	0.0778	0.168	0.212	0.128	0.0759	0.0707	0.144	0.16	0.086	0.168
ARHGAP24	1.26	2.21	1.9	3.44	5.33	3.78	1.54	1.62	1.99	1.94	0.881	1.31	1.14	1.27	1.71	1.37	2.3	5.15	0.824	1.37	2.58	2.68	1.51	1.83	1.07	7.27	3.68	1.14	1.72	1.96	1.75	0.898	1.42	2.12	3.59	1.07	1.4	1.33	1.46	3.1	2.51	1.36	1.91	1.18	1.19	1.83	3.32	0.799	0.865
ARHGAP25	122	82.4	135	151	237	125	77.1	91.2	96.9	78.2	70.8	96.6	98.7	98.5	97.5	75	132	196	70.1	87.7	124	148	67.7	111	89.9	150	208	50.4	84.7	82.4	82.1	73.3	103	161	102	62.1	40.4	115	135	204	184	60.5	89.8	63.7	93.9	78.6	82.6	69.7	66.8
ARHGAP26	27.1	18.8	23	35	40.6	45	14.1	21.6	21.3	17.4	9.35	16.1	17.3	13.9	16.1	12.6	25.4	40.6	10.4	12.2	20.6	30.6	15	19.6	24.8	44.9	60	9.09	15.3	16	12.6	18.2	18.5	27.5	40.9	14.6	8.79	20.5	22.7	47	46.9	17.3	18.1	11.9	26.3	22.6	23.6	14.7	11.7
ARHGAP26-AS1	0.0533	0	0	0	0	0.0197	0.0338	0	0.0252	0.0156	0	0.0259	0	0.0181	0.0146	0.0138	0	0.0277	0.0199	0	0.0199	0.0115	0	0	0.00987	0.0219	0.0212	0	0	0	0.0306	0	0	0	0.0175	0.0297	0.0181	0.0125	0.0148	0	0.0517	0.0083	0.0448	0.0107	0.0275	0.0311	0.0326	0	0.0128
ARHGAP27	93.3	106	78.3	135	128	139	68.4	78.2	79	65.1	52.1	63.3	70.7	69.9	79	60.9	69.6	120	89.7	57.4	60.1	88.5	67.3	93.6	83.9	113	140	33.1	55.2	59.7	47.4	78.9	68.7	108	116	65.6	46.8	75	84.6	112	128	65.6	69	60.7	96.6	79.9	65.3	76.2	54.5
ARHGAP28	0	0	0	0	0	0	0	0	0	0	0	0	0	0	0	0	0	0	0.00351	0	0	0	0	0	0.00174	0	0	0	0.00378	0	0	0	0	0	0.00309	0	0	0	0	0.00297	0	0	0	0	0	0	0	0	0
ARHGAP29	0.0429	0.1	0.0579	0.141	0.0998	0.19	0.0882	0.172	0.118	0.0603	0.039	0.0612	0.0497	0.0291	0.0219	0.0341	0.0395	0.107	0.0852	0.0253	0.0663	0.193	0.0486	0.183	0.0318	0.0776	0.292	0.0421	0.0745	0.0633	0.0329	0.107	0.0697	0.107	0.257	0.0622	0.101	0.0483	0.0286	0.432	0.124	0.0632	0.0841	0.105	0.0635	0.341	0.16	0.0331	0.0345
ARHGAP30	177	194	170	168	301	162	129	153	121	137	118	140	159	164	138	133	168	299	144	149	198	182	115	168	134	173	239	99.4	126	134	134	135	180	214	151	118	105	170	170	214	240	120	177	122	157	154	129	132	122
ARHGAP31	1.64	0.758	1.82	0.79	1.39	0.878	1.16	0.698	0.655	2.02	0.852	1.34	1.52	1.53	1.23	0.948	1.62	2.03	1.1	2.38	1.14	1.68	1.06	1.07	0.804	1.12	0.805	1.66	2.11	1.8	2.06	0.818	1.07	0.587	0.846	0.883	1.7	1.17	0.991	1.98	1.59	1.95	1.75	1.24	1.78	1.78	2.24	0.915	1.37
ARHGAP32	0.217	0.124	0.409	0.116	0.203	0.19	0.229	0.153	0.242	0.4	0.339	0.289	0.246	0.274	0.328	0.262	0.243	0.169	0.231	0.339	0.246	0.351	0.425	0.208	0.315	0.236	0.193	0.596	0.527	0.311	0.327	0.0933	0.0969	0.116	0.232	0.221	0.425	0.268	0.158	0.258	0.287	0.253	0.362	0.208	0.334	0.131	0.362	0.805	0.121
ARHGAP33	2.18	1.34	1.71	2.12	1.81	1.76	2.24	2.82	1.76	1.63	2.86	1.6	2.65	2.01	1.88	2.26	1.63	2.26	4.12	2.5	1.46	1.45	1.79	2.29	2.25	1.46	1.58	1.22	1.51	3.22	1.25	1.51	0.947	2	1.41	1.82	1.33	2.37	2.91	0.921	1.06	1.41	1.81	2.13	2.16	1.34	1.52	2.13	1.88
ARHGAP35	3	1.5	3.23	3.04	3.59	2.32	2.93	2.77	2.97	2.88	2.97	3.22	3.02	2.42	2.72	3.2	2.86	2.58	3.6	3.7	2.38	2.75	3.03	3.65	3.13	2.69	1.73	3.15	2.95	4.64	3	2.49	1.67	2.09	1.88	2.37	2.92	2.28	2.7	2.16	2.05	2.41	3.52	2.46	3.76	2.83	3.25	2.1	2.78
ARHGAP36	0	0	0	0	0	0	0	0	0	0	0	0	0	0	0.00462	0	0	0	0	0	0	0	0	0	0	0	0	0	0	0	0	0	0	0	0	0	0	0	0	0.00532	0	0	0	0	0	0	0	0	0
ARHGAP39	0.0304	0.0401	0.0611	0.0663	0.0147	0.0672	0.0621	0.118	0.0839	0.0297	0.0757	0.131	0.0923	0.0652	0.061	0.0971	0.0827	0.0263	0.128	0.0913	0.0682	0.0458	0.0448	0.0652	0.0919	0.0417	0.0242	0.0515	0.0284	0.0637	0.0553	0.0227	0.0412	0.0509	0.0398	0.0565	0.0189	0.0547	0.0338	0.016	0.0164	0.0395	0.0638	0.0304	0.0419	0.0237	0.116	0.0617	0.0366
ARHGAP4	124	151	120	163	168	124	98.8	129	112	113	123	114	134	167	123	135	97.5	168	202	121	160	116	120	147	135	111	148	68.5	94.4	123	90.3	104	187	127	95.5	119	96.1	137	125	95.9	122	107	138	97.7	116	129	80.9	135	96.8
ARHGAP40	0.00918	0	0.00396	0.00668	0	0	0	0	0	0.00538	0.00392	0	0	0.0125	0.00503	0.0143	0.0115	0	0.00685	0.00325	0.00687	0.0119	0.0065	0.0158	0	0	0.00732	0.00322	0.00368	0.0055	0.0317	0	0.00829	0.00839	0.012	0.0102	0.00936	0.00431	0.0153	0.00578	0.0238	0.00572	0.0231	0	0.00474	0.0107	0	0.0112	0.0177
ARHGAP42	0.0219	0.291	0.0331	0.0638	0.0213	0.0566	0.0742	0.0347	0.0467	0.0321	0.0351	0.0507	0.0409	0.026	0.0931	0.0398	0.031	0.0342	0.0286	0.0368	0.0041	0.0401	0.0582	0.0612	0.065	0.0541	0.0525	0.14	0.0792	0.0624	0.107	0.0943	0.0941	0.0301	0.111	0.0336	0.0503	0.00515	0.0153	0.0484	0.0887	0.132	0.0115	0.0768	0.0935	0.0417	0.186	0.02	0.143
ARHGAP44	0.049	0.0484	0.129	0.107	0.0534	0.0632	0.14	0.0968	0.113	0.061	0.0889	0.101	0.0862	0.054	0.124	0.0349	0.0654	0.07	0.0822	0.0953	0.0825	0.0632	0.0845	0.0867	0.138	0.0856	0.0634	0.133	0.108	0.128	0.194	0.114	0.0608	0.0392	0.0883	0.0683	0.164	0.106	0.0784	0.0926	0.0832	0.25	0.0823	0.0661	0.0474	0.115	0.21	0.0447	0.213
ARHGAP5	0.532	0.742	0.729	0.752	0.529	1.03	1.09	1.18	1.04	1.27	0.953	1.08	0.531	0.734	1.15	1.17	0.668	0.347	0.783	0.819	0.38	0.779	1.61	0.902	1.22	0.632	0.746	1.85	1.31	1.19	0.797	0.781	0.551	0.449	1.27	1.3	1.08	0.602	0.603	0.791	0.895	1.07	0.555	0.93	1.16	0.619	0.928	1.01	0.636
ARHGAP5-AS1	0.305	0.115	0.167	0.177	0.0986	0.405	0.379	0.309	0.366	0.262	0.304	0.416	0.253	0.193	0.379	0.348	0.32	0.211	0.288	0.324	0.259	0.228	0.389	0.14	0.241	0.251	0.114	0.3	0.416	0.28	0.14	0.259	0.331	0.167	0.187	0.284	0.29	0.21	0.227	0.141	0.263	0.108	0.197	0.252	0.2	0.226	0.365	0.297	0.128
ARHGAP6	0.209	0.0983	0.287	0.114	0.717	0.138	0.0975	0.044	0.115	0.171	0.0854	0.154	0.126	0.153	0.0929	0.137	0.238	0.362	0.12	0.117	0.212	0.157	0.131	0.106	0.227	0.29	0.194	0.227	0.148	0.177	0.265	0.276	0.0629	0.107	0.214	0.104	0.115	0.188	0.174	0.512	0.248	0.0718	0.307	0.101	0.191	0.117	0.154	0.132	0.136
ARHGAP8	0.755	2.17	0.221	0.593	0.571	0.591	0.211	0.373	0.286	0.142	0.503	0.206	1.58	0.266	0.405	0.141	0.608	0.141	1.21	0.385	0.656	0.28	0.112	0.266	0.28	0.137	0.337	0.117	0.352	0.76	0.478	0.881	0.75	0.345	0.267	0.278	0.359	0.128	0.345	0.295	0.147	0.193	0.317	0.381	0.601	0.565	0.326	0.469	1.05
ARHGAP9	223	222	216	334	467	345	110	213	253	186	148	126	192	226	156	154	198	423	163	124	307	269	133	261	230	289	406	59.2	113	104	102	138	190	313	235	122	71.5	266	231	249	308	129	133	109	206	122	98.3	153	100
ARHGDIA	110	88.7	103	86.4	135	61	65.7	68.4	51	87.7	83.4	96.2	128	156	82.7	89.3	96.5	137	126	120	159	99.3	63.8	70.6	65.2	81.2	79.8	51.5	79.6	90.5	103	92.3	156	109	56.9	58.6	73.8	103	93	81.3	85.9	70.3	118	73	64.2	112	92.4	72.2	93.6
ARHGDIB	1460	1140	1430	1590	2460	1430	826	1350	945	916	891	1270	1490	1550	1260	1060	1780	3150	762	1140	2430	1400	812	976	817	2210	2370	801	906	730	951	1180	1450	1830	975	809	601	1650	1920	1700	1170	636	1170	785	724	984	914	1070	736
ARHGDIG	1.33	2.66	0.179	0.422	0.376	0.51	0.468	0.385	0.157	0.324	0.342	0.336	1.42	1.39	1.41	0.315	0.8	0.575	0.619	0.225	0.248	0.393	0.186	0.0356	0.338	1.16	0.419	0.155	0.0999	0.547	0.604	0.248	2.75	2.96	1.16	0.231	0.226	0.221	0.185	0.192	0.197	0.00862	0.0465	0.0443	0.229	0.275	0.101	0.944	0.267
ARHGEF1	185	169	179	232	263	184	151	171	168	139	184	158	202	196	177	190	152	220	226	198	216	184	135	181	189	190	209	102	145	195	144	137	195	194	171	162	116	215	220	174	209	150	196	136	173	148	144	189	131
ARHGEF10	0.0652	0.258	0.225	0.356	0.316	0.351	0.465	0.307	0.384	0.218	0.366	0.156	0.181	0.212	5.19	0.599	0.123	0.116	0.195	0.529	0.0872	0.251	0.401	0.222	0.459	0.226	0.267	0.348	0.554	0.246	0.394	2.23	1.19	0.251	0.388	0.424	0.19	0.206	0.33	0.217	0.0814	0.337	0.147	3.06	0.315	0.0708	0.228	0.23	0.297
ARHGEF10L	4.7	2.3	6.12	2.72	4.17	3.57	2.93	1.88	2.31	6.68	3.38	5.66	6.23	6.74	4.81	3.57	5.92	4.12	5.8	6.97	8.17	5.85	4.41	3.05	3.49	3.44	2.38	3.88	6.34	6.25	5.63	3.99	6.95	1.41	2.78	3.84	6.93	5.99	3.69	4.7	5.83	7.19	6.72	6	5.38	6.27	4.92	5.99	3.53
ARHGEF11	22.6	21.3	16.6	23.3	35.6	23.7	12	11.3	13.9	14.2	8.42	11.7	12.7	12.4	13.6	10.1	14.2	28.1	10.2	11.4	16.9	23	10.7	15.4	12.8	20	31.3	8.89	12.4	10.7	11.7	11.2	14.4	24.9	22.3	11.3	10.8	16.5	19	28.8	37.2	15.8	17.1	13.5	19.9	15.1	18.6	16.9	9.93
ARHGEF12	2.17	4.13	1.12	1.19	3.13	1.39	1.12	1.13	1.07	1.24	1.05	1.13	1.93	2.69	1.1	1.05	1.96	1.14	2.88	0.988	1.25	1.03	0.905	1.24	1.27	2.09	1.07	1.44	1.06	1.73	1.95	1.42	1.68	1.31	1.65	0.812	1.15	0.621	1.08	1.84	1.35	0.935	1.32	0.969	2.14	2.25	1.78	0.735	1.44
ARHGEF15	0.0307	0	0.00794	0.00892	0	0.0136	0	0.00388	0.0116	0.00359	0.00524	0.00597	0.00508	0.00832	0	0.00954	0.00386	0.0191	0.0366	0.013	0.00459	0.00528	0.00652	0.00263	0.00455	0.00505	0.00489	0.00215	0.00246	0	0	0.0184	0.0333	0.0393	0.0362	0.00684	0.00626	0.00864	0.0103	0.00773	0.0278	0.00574	0.018	0.00491	0.00951	0	0.01	0.00374	0.00592
ARHGEF16	0.0179	0.0304	0.0232	0	0	0.00662	0.0228	0.0113	0.0297	0.0263	0.0268	0.0305	0.0149	0.0608	0.0246	0.0418	0	0.0187	0.0535	0.0508	0	0.0116	0.0191	0.00385	0.0299	0.0221	0.0358	0.0126	0.018	0.00538	0.0206	0.0134	0	0	0.0118	0.015	0.0122	0.00843	0.02	0.0113	0.0116	0.00839	0.00754	0.0108	0.0278	0	0.011	0	0
ARHGEF17	0.06	0.354	0.544	0.892	0.566	0.283	0.0592	0.173	0.172	0.959	0.517	0.143	0.0829	0.251	0.354	0.487	0.0587	2.97	0.087	0.163	0.137	0.224	0.0826	0.345	0.166	0.82	1.09	0.048	0.519	0.0799	0.61	0.105	0.0602	0.317	0.0459	0.0539	0.16	0.132	0.565	0.147	0.14	0.078	0.371	0.068	0.121	0.0838	0.0598	0.14	0.0949
ARHGEF18	26.2	21.2	29	38.6	38.6	27.6	22.8	27.1	25	23.3	27.8	27.6	27.1	30.1	31.2	31.1	24.3	28.2	27.1	36.6	31.3	33.6	28.4	24	29.7	29.3	27.1	23.3	28	26.2	25.1	20.5	21.3	27.3	28.4	27	23.4	29.8	29.5	25.9	36.2	22.1	29.3	20.7	22.5	22.3	29	29.8	19.7
ARHGEF19	2.18	1.24	2.03	1.56	1.43	1.43	2.19	2.44	1.97	1.8	3.18	1.82	2.67	2.16	2.21	2.3	2.33	1.7	2.93	2.8	2.17	1.89	2.38	2.11	2.41	1.78	1.09	1.71	1.91	2.15	2.26	1.97	2.02	2.34	1.77	2.46	2.39	2.35	2.33	1.05	1.81	1.53	2.2	2.17	1.83	2.25	1.59	2.5	2.78
ARHGEF2	53.2	57.5	57.1	63.3	101	58.2	36	39	37.5	42.3	32.7	42.6	47.5	52.8	43.6	40.5	54.4	75.5	39.7	47.7	56.5	60.3	35.5	43.7	46	54.6	73.2	32.9	42.2	42.2	44.5	40.2	48	52.2	51.3	37.1	32.2	51.7	56.8	70.1	74.9	36.5	46	34.6	48.7	47.5	42.2	44.2	36
ARHGEF25	0.159	0.19	0.202	0.199	0.283	0.189	0.198	0.14	0.205	0.155	0.461	0.129	0.337	0.342	0.136	0.225	0.145	0.101	0.198	0.122	0.305	0.156	0.178	0.171	0.2	0.182	0.289	0.217	0.167	0.302	0.148	0.139	0.192	0.242	0.122	0.183	0.195	0.187	0.261	0.178	0.16	0.146	0.279	0.248	0.187	0.186	0.162	0.183	0.162
ARHGEF26	0.0577	0.0109	0.0332	0.028	0.0327	0.0497	0.0366	0.0304	0.0228	0.0169	0.0123	0.0328	0.0279	0.0261	0.0316	0.02	0.00907	0.02	0.0287	0.0272	0.0252	0.0414	0.0409	0.031	0.0428	0.0436	0.0153	0.0169	0.0309	0.0375	0.0277	0.0072	0.00869	0.0308	0.0347	0.0215	0.0605	0.0249	0.0134	0.0455	0.0405	0.0405	0.0445	0.0327	0.0199	0.0535	0.0608	0.0322	0.0371
ARHGEF26-AS1	0	0.0113	0.00432	0	0	0.0074	0	0.00634	0.00949	0	0.00856	0	0	0	0.00549	0.0052	0.0126	0	0	0.00355	0	0	0.0142	0	0.00372	0	0	0.00352	0	0.00601	0	0	0	0	0.00657	0	0	0.00471	0	0.019	0.00649	0	0	0	0.0207	0	0	0	0
ARHGEF3	13.2	10	15.4	11.9	14.6	11	17.6	12.8	11.5	15	16.9	15.3	14.2	11.5	14.1	14.2	16.1	7.98	15.6	16.9	9.81	16.9	16.8	13.7	12.7	8.52	12.2	22.4	18	23.3	24.4	14.9	13.2	13.9	13.2	16.6	21	10.6	15.1	18.6	15.8	19.6	19.5	17.3	18.4	17.9	19.1	13.2	17.9
ARHGEF33	0.0182	0.0411	0.0209	0.0176	0.0176	0.0357	0.0358	0.0191	0.0287	0.0106	0.031	0.0236	0.0401	0.00821	0.0431	0.0376	0.0228	0.0566	0.0451	0.0171	0.0181	0.0156	0.0343	0.0208	0.0336	0.00996	0.0241	0.0255	0.0146	0.0254	0.0592	0.0407	0.0219	0.0111	0.0159	0.0135	0.037	0.0426	0.0169	0.0305	0.0157	0.0396	0.0203	0.0412	0.0125	0.0319	0.0074	0.0258	0.0321
ARHGEF35	0.0316	0.0119	0.0272	0.023	0.0306	0.0155	0.0267	0.0333	0.00499	0.0432	0.00899	0.0102	0	0.0357	0.0346	0.104	0.0265	0.0328	0.0157	0	0.0394	0.00906	0.00373	0.0136	0.0078	0.026	0	0.0333	0.0127	0.0126	0.0182	0.0236	0.0381	0.0289	0.0276	0.0117	0.0286	0.00494	0.0235	0.0199	0.0136	0.0164	0.0133	0.00842	0.0326	0	0.0429	0.0257	0.0254
ARHGEF37	0.343	1.2	0.037	0.152	0.171	0.174	0.043	0.0677	0.0355	0.185	0.0617	0.135	0.337	0.24	0.123	0.0749	0.175	0.228	0.284	0.0493	0.0682	0.0461	0.0436	0.0598	0.0556	0.128	0.124	0.101	0.0688	0.109	0.139	0.256	0.358	0.166	0.151	0.0687	0.188	0.078	0.11	0.081	0.204	0.0601	0.0293	0.0514	0.155	0.36	0.118	0.144	0.132
ARHGEF38	0.0128	0.00967	0.00738	0.0156	0.0083	0.00316	0.00724	0.00271	0	0.00752	0.00365	0	0.0106	0.0174	0.0141	0.00887	0.0108	0.0178	0.00638	0.00756	0.0064	0.00736	0.00151	0.0147	0.00159	0.00352	0.00682	0.012	0.0154	0.0103	0.00492	0.0064	0.00386	0.00391	0.0196	0.00239	0.00727	0	0.00953	0.0108	0.0111	0.008	0.0162	0.0103	0.00884	0.0025	0.00349	0.00261	0.0165
ARHGEF38-IT1	0	0	0	0	0	0	0	0	0	0	0	0	0	0	0	0	0	0	0	0	0	0	0	0	0	0	0	0	0	0	0	0	0	0	0	0	0	0	0	0	0	0	0	0	0	0	0	0	0
ARHGEF3-AS1	0	0	0	0	0	0	0	0	0	0	0	0	0	0	0	0	0	0	0	0	0	0	0	0	0	0	0	0	0	0	0	0	0	0	0	0	0	0	0	0	0	0	0	0	0	0	0	0	0
ARHGEF4	0.275	0.318	0.486	0.757	0.315	0.384	0.205	0.519	0.493	0.28	0.434	0.357	0.406	0.411	0.684	0.606	0.254	0.49	0.178	0.485	0.426	0.421	0.373	0.187	0.456	0.418	0.273	0.466	0.555	0.249	0.257	0.348	0.437	0.252	0.521	0.471	0.256	0.319	0.3	0.424	0.531	0.155	0.231	0.33	0.136	0.197	0.2	0.548	0.171
ARHGEF40	31.2	14.9	23.3	89.1	49.1	64.5	9.99	21.7	18.5	20.3	11.4	19	15.3	20.1	18.4	17.7	32.6	85.3	8.51	12.6	39.2	24.1	18.6	19.4	26.1	96.5	62.4	5.45	17.7	14.7	11.6	19.9	13.9	26.7	36.8	8.96	9.92	25.5	29.4	55.2	40.3	15.1	21.9	14.4	16.6	23.8	19.6	16.9	9.12
ARHGEF5	0.19	0.225	0.109	0.204	0.198	0.116	0.177	0.144	0.121	0.239	0.16	0.162	0.197	0.241	0.169	0.175	0.209	0.321	0.219	0.168	0.277	0.112	0.134	0.102	0.13	0.207	0.0946	0.303	0.122	0.142	0.227	0.153	0.339	0.195	0.128	0.122	0.157	0.114	0.182	0.126	0.132	0.141	0.209	0.141	0.15	0.117	0.186	0.179	0.227
ARHGEF6	20.8	22.3	26.5	23.3	28.6	21.9	23.3	25.1	18.7	25.3	19.6	21.8	21	21.3	22.4	22.5	26.5	27	21.9	25.3	18	31.2	22.9	24.4	26.5	20.8	28.9	26	26.9	23.1	24.3	17.6	18	24.4	21.3	24.4	20.3	28.3	23.4	34.2	28.3	21.3	24.1	18.5	25.6	19.1	20.9	23.3	19.2
ARHGEF7	3.55	3.35	4.94	3.74	4.35	3.61	3.9	3.44	3.51	4.14	3.97	3.94	3.93	3.1	4.25	4.02	3.89	4.28	4.81	4.45	4.09	4.58	4.4	3.84	3.8	3.99	4.62	4.91	4.45	4.2	4.75	2.96	2.79	3.73	4.09	3.48	3.45	4.1	3.61	4.35	3.73	3.75	3.87	4.06	4.5	3.39	5.18	3.2	3.65
ARHGEF9	1.82	1.47	2.17	1.78	1.38	1.9	2.45	2.12	2.46	1.62	2.86	2.35	2.36	1.7	2.44	2.56	2.34	1.26	2.65	2.48	1.7	1.85	2.54	2.1	1.87	1.41	1.85	3.23	2.64	2.97	2.27	1.77	1.51	1.51	1.65	2.3	2.44	1.82	2.26	1.93	1.53	1.87	2.08	2.32	1.93	1.95	2.16	2.45	2.32
ARID1A	16.9	11.5	19.3	21.1	25.9	19.4	12.2	12.8	15.6	13.2	11.2	12.4	11.7	10.2	14.8	12.1	14.3	16.8	13.6	15.3	13.6	20.4	11.7	14.6	15.1	21	19.8	10.8	16	16.2	13.4	9.78	9.99	14.3	19	11.6	10.2	11.9	14.1	28.2	27.8	14.1	14.9	10	19.2	14.4	17.4	11.6	9.38
ARID1B	4.25	2.98	5	5.05	5.47	3.98	4.44	3.66	4.24	3.93	4.26	4.04	3.59	3.21	4.44	4.46	4.06	3.86	3.88	5.19	2.64	5.36	4.4	3.98	4.01	4.51	4.25	4.68	5.19	5.01	4.73	2.94	2.26	3.99	5.14	3.64	3.89	3.45	4.13	5.57	5.79	4.44	4.17	3.52	5.07	3.46	5.27	3.43	3.38
ARID2	2.54	2.12	3.13	3.01	3.48	2.89	2.8	2.57	2.5	2.74	2.32	2.74	1.9	1.83	2.62	2.46	2.88	2.33	2.16	2.69	1.74	3.11	2.55	2.81	2.71	3.13	3.66	3.32	3.31	3	3.01	1.83	1.78	2.31	3.08	2.79	2.33	2.27	2.51	4.32	3.93	3.08	2.36	2.35	3.19	2.41	3.05	2.24	2.16
ARID3A	9.84	14.4	11.7	20.1	28	16.4	6.61	9.32	11.3	9.57	5.71	9.22	8.24	9.49	9.58	8.47	8.93	15.5	9.19	6.75	9.15	14.8	6.74	10.9	9.26	17.5	19.8	2.96	6.31	7.96	6.79	7.54	6.57	19.3	12.1	6.35	6.15	8.83	8.52	16	19.4	8.2	10.3	5.11	11.1	8.84	8.24	8.03	6.8
ARID3B	2.86	2.98	2.51	3.82	4.48	2.84	1.93	2.58	2.32	1.64	1.93	2.01	2.3	2.25	2.27	2.19	2.55	4.24	2.08	2.17	2.34	2.92	1.85	2.36	2.16	2.66	4.05	1.29	1.87	1.76	1.83	2.02	2.4	4.36	2.63	1.82	1.25	2.82	2.74	3.43	4.29	1.72	2.26	1.84	2.13	2.3	2.01	2.17	1.97
ARID3C	0	0.0238	0.00907	0.0306	0	0.0155	0.0178	0.0266	0.0299	0.0616	0.00898	0	0	0.057	0.0115	0.0218	0	0	0	0.00744	0	0.0181	0.00745	0.0361	0.0234	0.0173	0.0168	0.00738	0	0.0126	0.0726	0.0315	0.019	0.0384	0	0.0352	0.0143	0.0197	0	0.0132	0	0	0.0619	0.00841	0.0109	0.0123	0.06	0.0128	0.0203
ARID4A	7.2	7.38	6.02	10.6	9.72	13.3	6.73	8.07	9.9	8.31	5.19	6.88	3.96	3.75	6.65	5.1	8.03	6.78	4.69	4.73	3.78	8.66	7.71	9.86	9.01	12.5	17.8	7.01	7.97	6.71	6.39	5.67	5.55	7.84	13.2	6.98	6.19	4.32	5.6	16.4	13.2	7.76	5.35	6.81	11.2	7.67	7.61	5.48	4.98
ARID4B	8.63	9.01	6.61	13.9	8.58	17.1	9.65	9.59	13.4	11.1	6.89	7.83	4.07	4.16	7.55	6.3	8.31	5.55	6.39	4.83	3.5	10.3	10.2	12.4	11.1	12.9	17.4	9.85	9.81	9.63	7.69	8.23	7.36	9.91	22.6	9.83	9.3	4.79	6.75	22.2	17.1	11.2	6.27	9.1	17.8	10.3	9.28	6.49	7.03
ARID5A	67.4	44.9	39	59.7	78.8	71.3	27.1	39.8	38.2	26.3	33.8	41	39.2	48.9	31.3	42.5	35.1	108	47.7	41.2	53.4	43.2	34.5	43.9	38.9	107	73.1	17.8	28.9	32.8	27.4	43.8	59.5	77.6	58.9	30.8	28.4	59.9	47.4	59.5	45.7	25	44.5	34.8	28.6	47.3	33.4	35.4	36.5
ARID5B	1.96	1.66	1.92	1.82	1.42	1.79	3.02	2.71	2.19	1.31	3.03	2.58	1.49	1.93	2.07	2.39	2.01	1.71	2.15	2.81	1.44	2.19	3.18	2.63	2.36	1.28	1.72	3.11	1.94	2.32	2.79	2.07	1.62	1.66	2.91	3.01	3.11	1.79	1.72	2.26	2.12	3.36	2.47	2.08	2.91	1.86	3.49	1.28	2.6
ARIH1	8.75	7.23	9.68	9.17	12.4	8.99	8.63	8.37	8.54	8.16	7.38	7.74	7.55	7.45	8.29	7.72	9.72	9.5	6.51	8.37	6.84	10.1	7.89	7.85	7.8	10.8	13.5	8.44	10	8.45	8.81	6.51	6.68	9.71	8.9	7.56	6.96	7.73	8.19	14.5	11.9	8.33	8.23	7.7	9.08	7.97	8.99	7.63	7.53
ARIH2	13.4	14.8	13.8	13.9	15.2	13.1	15.1	15.7	15.8	13.5	17.1	15.1	15.6	14.1	14.8	14.5	15.1	12.4	19.9	15.9	12.4	15.1	16.1	15.7	14.1	12	14.8	15.9	14.1	18	14.7	14.5	13.2	14.7	11.7	15.4	14.9	16.4	16.2	12.5	12.6	13.8	14.4	17.3	15.7	13.3	11.8	14.2	16.5
ARL1	2.82	3.92	2.1	2.64	1.85	2.92	4.04	3.49	3.35	3.6	3.89	3.79	3.7	3.1	3.37	3.47	3.64	2.23	3.27	3.39	2.61	2.83	3.81	3.87	3.35	2.48	2.1	5.11	3.99	3.73	4.13	4.24	3.95	2.27	3.28	3.88	4.53	3.16	3.24	2.82	2.68	4.63	2.8	4.83	3.22	3.33	3.44	3.48	5.26
ARL10	0.336	0.355	0.547	0.622	0.105	0.831	0.829	0.685	1.18	0.476	0.884	0.643	0.305	0.272	0.552	0.651	0.279	0.124	0.638	0.644	0.114	0.34	1.45	0.688	1.29	0.419	0.406	1.24	0.643	1.14	0.38	0.478	0.0391	0.238	0.795	0.864	1	0.198	0.344	0.43	0.266	0.513	0.432	0.433	0.98	0.45	0.534	0.647	0.371
ARL11	11.5	16.7	8.64	16.7	16.3	15.3	8.56	12.7	9.03	8.97	5.45	8.67	7.49	8.23	9.77	7.56	9.84	18.2	7.38	5.42	11.1	12.3	6.77	12.4	8.86	16.9	26.8	5.07	7.11	6.54	4.63	10.9	9.81	19.5	12	8.94	6.34	11	9.81	19.9	16.7	8.15	8.64	7.88	10.5	9.88	7.15	9.22	6.86
ARL13A	0.119	0.0958	0.161	0.173	0.0822	0.15	0.136	0.107	0.217	0.119	0.181	0.0825	0.14	0.069	0.158	0.167	0.107	0.0352	0.101	0.234	0.0254	0.139	0.282	0.167	0.207	0.167	0.122	0.244	0.163	0.152	0.117	0.139	0	0.155	0.133	0.132	0.121	0.151	0.113	0.16	0.0987	0.122	0.107	0.122	0.0876	0.129	0.194	0.176	0.0899
ARL13B	0.483	0.531	0.467	0.854	0.443	0.775	0.767	0.599	0.837	1.05	0.644	0.692	0.346	0.257	0.715	0.673	0.582	0.258	0.681	0.42	0.215	0.618	1.09	0.924	0.805	0.736	0.911	1.01	0.809	0.903	0.631	0.595	0.342	0.531	0.992	0.772	1.07	0.313	0.443	1.02	0.773	0.956	0.463	0.749	0.964	0.805	0.769	0.672	0.548
ARL14	0.0202	0	0.0174	0	0	0	0.0427	0	0.00957	0	0	0	0	0	0	0.0105	0	0	0	0.0214	0.0454	0.0087	0.00716	0	0.015	0	0	0	0	0.0242	0	0.0151	0	0	0	0.0338	0.0137	0.00949	0.0113	0	0	0.0126	0.00849	0	0	0	0.00824	0	0.0195
ARL15	3.08	3.12	2.48	2.74	3.26	3.04	2.69	3.04	2.8	2.81	2.54	2.45	2.13	1.98	3.23	2.67	3.15	2.33	1.83	2.02	1.99	3.64	2.23	2.75	2.3	2.86	4.45	2.98	2.99	2.47	2.9	2.56	2.1	2.59	2.94	2.36	2.73	2.51	2.34	3.76	3.88	2.67	2.16	2.31	3.1	2.84	2.41	2.5	2.55
ARL16	6.47	8.59	6.63	7.85	4.19	4.38	8.88	4.87	8.44	7.08	8.53	7.92	9.37	8.07	7.8	5.35	5.41	8.53	12.7	7.89	9.97	6.08	8.02	9.28	5.33	7.9	7.26	6.45	7.27	4.93	6.89	6.94	9.42	7	4.36	5.89	7.22	9.26	6.74	4.91	5.68	7.33	7.18	8.95	6.58	6.57	5.96	8.44	8.56
ARL17A	0.0546	0.0412	0.0432	0.0397	0.0618	0.0235	0.0751	0.104	0.0797	0.088	0.0214	0.0465	0.0905	0.0494	0.0748	0.0307	0.0715	0.0757	0.0271	0.0193	0.0273	0.0725	0.0338	0.113	0.0607	0.0225	0.116	0.0447	0.0201	0.0845	0.0314	0.0204	0.0617	0.0707	0.137	0.0888	0.0387	0.0919	0.0329	0.0946	0.0265	0.0326	0.0306	0.0491	0.0729	0.0133	0.0371	0.0305	0.0439
ARL17B	0	0	0.023	0	0.0518	0	0.0903	0.101	0	0.0625	0.0228	0	0	0	0.0292	0.138	0.0336	0.0555	0	0	0	0.023	0	0.0687	0.0396	0	0.0426	0	0.0214	0	0	0.0399	0.0482	0.146	0.105	0	0.0363	0.1	0.0297	0.0336	0	0	0	0.0214	0.0276	0.0312	0	0.0325	0.0257
ARL2	15.9	12.7	13.8	9.74	13.8	9.1	12.8	10.6	9.75	15.4	15.3	15.8	22.2	26.8	17.2	19.7	13.3	13.3	21	20.7	30.5	11.6	12.3	10.5	11.8	9.58	7.27	14.7	13.9	16.5	15.5	16.4	31.9	14.8	8.9	14.3	15.2	17.4	16.7	9.05	10.5	11.5	17.5	16.1	10.3	18.3	12.2	14.4	14.8
ARL2BP	15.4	13.5	13.9	13	14.6	13.3	14.5	19.5	13.3	16.7	16.5	18.6	15.5	18.3	15.8	17.8	18.8	11.7	14.7	16.6	20.2	16.7	17.8	13.2	14.6	14.3	13.5	21	17.9	17	17.7	15.5	14.1	12	11.8	17.2	17.4	14.7	15.7	14	12.6	15.6	14.7	16.9	13.4	15.5	15.1	19.1	15.6
ARL2BPP2	0	0	0	0	0	0	0	0	0	0	0	0	0	0	0	0	0	0	0	0	0	0	0	0	0	0	0	0	0	0	0	0	0	0	0	0	0	0	0	0	0	0	0	0	0	0	0	0	0
ARL2-SNX15	15.9	12.7	9.84	7.92	11.4	6.59	10	6.62	5.94	11.6	9.71	12.4	13.3	13.1	14.9	9.8	9.93	11.1	10.9	11.3	14.1	8.5	8.28	7.25	9.14	6.48	6.26	11.4	9.78	9.26	9.34	10.2	18	9.41	6.35	8.01	8.98	11.2	9.94	7.3	8.45	7.29	12.1	11	9.68	10.9	9.08	8.54	9.73
ARL3	2.96	2.13	1.66	2.39	2.47	3.1	1.34	2.05	2.14	1.91	1.5	2.71	2.37	2.29	2.07	1.55	2.63	4.1	1.6	1.63	2.82	1.89	1.88	2.05	2.06	3.47	2.92	1.49	1.96	1.06	1.25	1.95	2.74	1.66	2.03	1.51	1.47	1.66	2.44	2.11	1.81	1.54	1.46	1.82	1.89	1.83	1.52	2.41	1.63
ARL4A	0.63	6.45	0.298	0.768	0.383	0.617	0.344	0.831	0.622	0.596	0.311	0.499	0.567	0.423	0.362	0.382	0.358	0.6	0.516	0.398	0.421	0.504	0.538	0.62	0.279	0.688	0.715	0.696	0.497	0.328	0.511	0.534	0.851	0.535	0.722	0.42	0.865	0.332	0.275	0.867	0.383	0.467	0.37	0.666	0.491	0.8	1.1	0.37	0.491
ARL4C	30.7	26.5	27.4	26.8	31.5	21.2	37.5	31.6	30.8	22.6	45.3	36.5	38.2	28.6	28.4	35.9	27.9	11	50.9	37.1	25.4	28	37.6	33.2	31.8	20.9	18.9	40.1	37	49.3	38.1	39.9	28.2	32.2	18	30.8	37.5	29	36.6	28.5	19.8	31.9	31.7	34.9	31.3	37	31.1	27.5	39.7
ARL4D	0.509	0.725	0.603	0.406	0.606	0.461	0.626	0.707	0.358	0.443	0.681	0.544	0.558	0.312	0.387	0.835	0.341	0.239	0.846	0.698	0.64	0.531	0.565	0.473	0.378	0.433	0.288	0.785	0.633	0.591	0.596	1.02	0.921	0.406	1.02	0.623	0.889	0.563	0.723	0.362	0.479	0.605	0.787	0.789	0.544	0.509	0.878	0.911	1.07
ARL5A	2.34	4.58	2.17	3.35	2.26	3.86	3.98	3.94	4.23	4.91	3.43	3.74	2.06	1.53	3.76	2.97	2.85	1.59	3.57	2.04	1.94	3.15	4.7	4.66	3.25	3.31	3.48	6.03	4.21	4.05	3.62	4.86	2.67	2.15	3.63	4.31	5.9	1.84	1.8	3.71	3.43	5.65	2.26	5.66	4.14	4.56	3.88	3.09	4.48
ARL5B	1.03	1.39	0.977	1.47	0.76	1.91	1.45	0.969	1.81	1.51	1	1.07	0.553	0.295	1.07	0.892	0.803	0.4	0.877	0.639	0.228	0.95	1.73	1.5	1.6	1.04	1.63	2.07	1.4	1.62	1.24	1.6	0.715	0.989	2.58	1.62	2.31	0.504	0.708	2.48	2.19	2.31	0.717	1.77	2.44	1.88	1.58	0.893	1.23
ARL5C	0.0554	0	0.0358	0.0604	0.0269	0	0.0937	0	0.0786	0.162	0.106	0.0808	0.0918	0	0.0607	0.0287	0.0696	0	0.103	0.0392	0.187	0.119	0.098	0.0238	0.0205	0.0228	0	0.0194	0.111	0.149	0.0318	0.0621	0.025	0.0253	0.0181	0.0772	0.0659	0.065	0.0925	0.0349	0.0717	0.0345	0.0465	0.0554	0.0429	0.178	0.0677	0.0843	0.0401
ARL6	0.179	0.304	0.232	0.417	0.191	0.463	0.485	0.465	0.45	0.368	0.574	0.27	0.342	0.134	0.412	0.483	0.225	0.0746	0.227	0.336	0.0537	0.247	0.489	0.408	0.558	0.266	0.243	0.585	0.468	0.623	0.237	0.429	0.162	0.131	0.423	0.57	0.555	0.236	0.2	0.271	0.278	0.442	0.309	0.495	0.649	0.262	0.314	0.557	0.545
ARL6IP1	32.4	48	27.5	34.3	38.4	27.7	32.2	36.1	27.2	28.1	30.3	35.3	29	22.3	29.4	30.4	34.6	22.7	28	30.9	28.1	33.4	31.5	38.4	30.4	34.9	36.8	39.7	30.7	32.9	39	39.4	25.7	30.3	32.8	34.6	32.7	27.8	28.9	38.5	32.2	32.8	34.4	35.8	34.2	38.8	33.1	32.2	34.8
ARL6IP4	49	56.4	41.8	49.2	53.4	41.5	42.5	50.2	44.8	56.7	49.2	62.5	62.9	87.2	46.5	61.2	50	65.2	83.3	58	99.2	40.6	50.1	46.9	43.9	44.3	35.6	42.5	46.6	47.9	39.5	56.4	107	52.8	32.4	57.9	49.9	64.5	52.2	27.7	33.9	43.7	49.7	57.8	35.8	60.7	34.8	56.8	55.8
ARL6IP5	69.5	85.3	64.7	92.2	84.6	94.9	86	95.8	79.3	82.2	79.8	94.2	82.1	76.4	79.6	78.9	93.8	75.5	78.8	74.2	70.5	88.6	91.4	96.6	82.8	77.4	107	103	79.4	71.8	76.2	99.4	65.1	84.9	70.9	85.6	81.6	84.1	80.2	94	68	78.1	73	76.3	79.6	88.2	73.4	86.8	78.6
ARL6IP6	5.64	7.38	3.52	9.49	8.16	9.54	5.58	6.62	6.7	6.94	4.61	5.93	4.27	3.28	5.74	5.69	5.59	4.32	5.41	3.9	4.14	6.3	5.49	7.12	5.75	8.7	10	5.36	5.25	5.62	4.61	6.28	4.78	8.28	8.44	5.98	6.34	4.85	5.17	8.41	8.75	6.58	4.73	6.2	7.68	6.5	5.39	6.21	5.15
ARL8A	30.7	32.7	22.5	33.3	49.9	27.1	17.6	23.5	18	19	16.2	20.9	24.5	24.3	20.9	20.3	28.8	45.4	19.9	20.3	39.8	30.3	14.3	22.6	16	29.5	45.4	12.4	16.2	17.1	16.8	21.5	34	41.5	22.7	16.3	15.3	23.6	28.8	37.8	36.6	17.6	24.2	17.5	19.6	24.3	22.1	21	19.9
ARL8B	12.2	19	11.8	13.6	15.7	15.4	15.1	14.7	12.9	19.3	12.6	14.4	11.5	11.9	14	12.8	15.7	18	11.2	12.5	9.49	16.1	13.6	16.5	12.5	15.3	18.9	17.1	16.6	13.4	14	15.2	14.2	15.4	14	15.6	16	13.3	11	21.1	17.3	16.7	12.5	16.6	14.5	15.8	13.3	15.4	14.2
ARL9	0	0.0352	0	0.0453	0.0604	0.069	0.132	0	0.0885	0.0548	0	0.0152	0.0258	0.0423	0.0171	0	0.0979	0.0972	0.0465	0.0551	0.0233	0.0134	0.0552	0.0803	0.0462	0.103	0.0497	0.0438	0.0375	0.0187	0.0179	0.0233	0	0	0.0204	0.0521	0.106	0	0.0521	0.0196	0.0807	0.00971	0.0655	0.0374	0.0644	0.0547	0.0635	0.057	0.12
ARMC1	2.71	3.5	3.16	2.68	2.47	3.46	4.7	4.32	4.47	4.39	4.91	4.43	3.47	2.6	4.53	4.65	3.92	1.8	3.33	3.97	1.86	3.44	5.32	4.32	4.41	3.02	2.64	7.31	5.24	5.26	4.26	4.57	2.68	2.96	3.51	5.18	6	2.92	3.2	3.55	2.92	4.97	3.14	5.2	4.5	3.52	4.51	4.07	4.38
ARMC10	0.842	0.986	0.808	0.951	0.75	1.16	0.956	1	0.99	1.35	0.956	1.11	0.797	0.927	0.993	0.96	0.997	1.24	1.2	0.922	1.05	1.08	0.979	1.07	1.22	1.69	0.988	1.1	1.09	1.02	1.12	0.993	1	0.797	0.695	1.35	1.18	0.996	0.922	0.993	0.699	1.1	1.01	1.05	1.1	0.956	0.861	1.21	1.36
ARMC12	0.512	0.882	0.49	3.14	1.21	3.34	0.509	1.28	1.52	0.574	0.619	0.542	0.517	0.786	0.586	0.866	0.7	1.92	0.598	0.52	1.27	0.787	0.402	0.995	0.487	2.35	1.85	0.438	0.644	0.414	0.397	0.75	0.523	2.36	2.25	0.684	0.455	0.628	0.72	1.11	1.07	0.479	0.581	0.749	0.345	1.07	0.936	0.855	0.645
ARMC2	1.05	0.898	0.79	1.17	0.896	1.65	1.18	1.22	1.34	0.854	0.776	0.854	0.987	0.771	0.819	0.862	0.936	1.21	0.848	0.537	1.3	0.953	0.932	1.09	1.48	1.72	1.83	0.94	0.702	0.805	0.584	0.862	0.441	0.698	1.28	0.724	0.768	0.487	1.14	1.35	0.879	0.94	0.712	0.837	1.24	0.977	0.831	0.809	0.806
ARMC3	0.0371	0.0525	0.084	0.0337	0.216	0.0137	0.0314	0.0411	0.0791	0.0978	0.0436	0.108	0.0308	0.101	0.0762	0.024	0.128	0.0193	0.0208	0.0427	0.104	0.0759	0.0361	0.0159	0.0516	0.0305	0.104	0.0521	0.0447	0.0111	0.0534	0.153	0.0335	0.0848	0.073	0.031	0.0505	0.0218	0.093	0.0409	0.12	0.0116	0.0468	0.0148	0.0623	0.0271	0.034	0.0452	0.0403
ARMC4	0.0146	0.00825	0	0.0053	0	0	0.00309	0.00461	0.00691	0	0	0.00355	0	0	0.00399	0.00378	0	0.0227	0	0.00516	0.00546	0	0.0129	0.00313	0.0027	0.006	0.00582	0.00512	0.00878	0	0	0	0.00659	0	0.00478	0.00407	0.0124	0.00342	0.0162	0.00919	0	0	0	0.0175	0.00754	0.00426	0.00892	0.0178	0
ARMC5	2.3	1.46	2.2	2.2	2.1	1.52	2.08	2.11	1.95	2.41	2.66	2.23	2.74	3.36	2.3	2.89	1.9	1.87	3.96	2.93	2.49	1.7	2.61	2.01	2.17	1.52	1.2	1.41	2.05	2.77	2.12	2.51	2.17	1.83	1.2	2.1	2.05	2.24	2.26	1.26	1.46	1.68	2.51	1.89	1.83	2.13	1.93	2.63	2.3
ARMC6	7.27	7.35	9.3	8.76	8.43	6	7.35	6.48	6.17	7.88	8.49	7.33	10.3	12.4	8.33	8.74	7.97	7.94	11.6	9.66	12.4	8.47	8.06	7.44	6.97	7.06	5.83	7.17	8.31	9.79	9.58	10.4	12	8.82	5.86	7.14	8.26	9.21	7.9	5.83	6.46	7.76	10.5	8.38	6.58	9.09	8.93	7.96	8.43
ARMC7	12.2	10.9	11.1	10.3	19.7	8.61	7.04	8.1	6.85	8.79	7.25	9.81	12.5	13.9	9.43	8.67	11.9	15.4	8.49	10.7	15.2	11.9	6.54	8.31	7.67	8.63	11.2	6.26	7.62	7.96	8.44	8.43	14.5	15.5	8.88	7.08	6.94	12.6	11.7	12.8	13	7.05	9.76	7.67	7.96	10	8.37	8.97	8.17
ARMC8	4.93	5.74	5.15	5.18	5.91	5.32	5.01	5.39	4.77	5.58	4.36	4.95	4.77	3.91	4.83	4.47	5.74	6.03	4.13	5.17	4.13	6.24	4.7	5.06	5.14	5.64	6.94	6.09	5.53	5.3	5.48	4.55	4.47	5.56	5.49	5.27	4.81	4.38	4.81	7.83	5.84	5.3	4.89	5.05	6.15	4.9	5.63	5.11	4.74
ARMC9	0.047	0.0398	0.0557	0.00854	0.125	0.0693	0.0845	0.0669	0.0556	0.0138	0.0451	0.0457	0.0584	0.0558	0.0708	0.0426	0.0443	0.0122	0.0438	0.0582	0.0616	0.0455	0.0499	0.0252	0.0174	0.058	0.112	0.115	0.066	0.0845	0.054	0.0615	0.0106	0.0537	0.1	0.0852	0.112	0.0441	0.0393	0.0666	0.0532	0.0622	0.0543	0.047	0.0364	0.0618	0.0766	0.0501	0.085
ARMCX1	0.328	0.564	0.441	0.469	0.224	0.395	0.458	0.416	0.622	0.863	0.696	0.639	0.464	0.512	0.573	0.347	0.52	0.38	0.481	0.663	0.374	0.665	0.646	0.402	0.505	0.481	0.359	0.799	1.11	0.481	0.483	0.428	0.594	0.189	0.335	0.726	0.885	0.526	0.393	0.537	0.559	0.789	0.476	0.716	0.384	0.59	0.546	0.593	0.493
ARMCX2	0.874	0.734	1.02	0.668	0.393	0.732	1.24	0.883	1.09	0.866	1.35	0.829	0.956	0.819	1.17	1.11	0.651	0.562	0.524	1.36	0.681	0.791	1.12	0.46	0.848	1.07	0.74	1.47	1.41	0.686	1.3	0.829	0.676	0.815	1.65	1.5	1.39	0.884	0.903	0.687	1.24	1.34	1.05	1.18	0.671	0.611	1.25	1.73	1.26
ARMCX3	4.85	5.82	3.86	4.58	4.95	4.59	5.87	4.12	4.82	5.64	4.73	4.5	3.88	3.67	4.26	4.62	4.66	4	4.21	4.33	3.45	5.03	4.95	4.87	4.79	4.23	5.19	6.05	5.61	5.62	5.57	5.49	4.51	4.34	6.06	5.08	6.41	4.31	4.1	7.13	6.66	7.47	4.52	5.37	5.78	5.42	6.73	4.96	6.11
ARMCX3-AS1	0.77	1.7	0.68	0.747	0.89	1.3	1.2	0.835	1.01	0.795	1.18	1.36	0.76	0.498	0.985	1.08	1.08	0.763	1.18	0.818	0.44	0.963	1.27	1.28	1.29	0.936	0.702	0.902	1.19	1.74	1.31	1.54	0.696	0.872	1.64	1.06	1.72	0.896	0.756	1.71	1.4	1.36	0.91	1.17	1.37	1.52	1.62	1.25	1.26
ARMCX4	0.183	0.188	0.249	0.207	0.11	0.256	0.313	0.246	0.292	0.209	0.302	0.151	0.192	0.188	0.244	0.228	0.213	0.128	0.234	0.305	0.157	0.251	0.257	0.193	0.231	0.216	0.202	0.309	0.323	0.213	0.188	0.158	0.136	0.15	0.257	0.406	0.282	0.239	0.236	0.198	0.27	0.253	0.235	0.266	0.222	0.0893	0.171	0.29	0.209
ARMCX5	1.56	1.31	1.48	1.52	1.26	1.43	1.76	2.14	1.77	2.08	1.98	2.04	1.04	1.36	1.85	2.13	1.81	1.09	1.85	1.84	1.47	1.78	2.28	1.56	2.04	1.32	1.33	2.91	2.39	2.05	1.85	1.72	1.49	1.02	1.69	2.43	2.58	1.57	1.51	1.58	1.49	1.82	1.78	2.07	1.48	1.72	1.67	1.98	1.37
ARMCX5-GPRASP2	0.423	0.389	0.374	0.322	0.295	0.405	0.526	0.456	0.463	0.585	0.621	0.373	0.274	0.323	0.489	0.493	0.432	0.22	0.424	0.458	0.282	0.464	0.592	0.332	0.453	0.25	0.295	0.782	0.716	0.475	0.517	0.371	0.209	0.193	0.355	0.575	0.661	0.453	0.346	0.4	0.368	0.47	0.308	0.45	0.407	0.375	0.291	0.64	0.284
ARMCX6	3.31	3.39	2.61	1.82	2.62	1.63	3.06	2.15	2.16	2.35	2.68	2.7	3.23	2.84	2.63	2.66	2.4	2.22	2.74	2.8	2.51	2.07	2.72	1.95	2.45	2.26	1.91	3.21	3.21	2.59	3	3.82	2.98	2.66	2.59	3.22	2.64	2.89	2.54	2.08	2.53	2.58	3.12	2.69	2.42	2.97	3	3.41	3.12
ARMS2	0	0	0.0139	0.0234	0	0	0	0	0	0	0	0	0	0	0.0177	0.0167	0	0	0.024	0	0.0483	0	0	0	0	0	0	0	0.0129	0.0193	0	0	0.0874	0	0	0	0	0	0	0	0	0	0.0135	0	0.0167	0.0189	0	0	0
ARNT	9.29	8.85	11.5	9.58	15.2	10.6	7.56	8.14	8.73	10.6	8.56	8.97	8.98	8.93	8.82	8.34	10.7	13.6	7.55	10.5	10.9	13.4	8.93	9	10.3	12.5	13.6	10	10.5	8.8	11.3	7.7	8.23	9.81	9.55	8.14	8.33	11.5	10	15.3	13	10.7	11.8	8.45	8.94	10.8	11	8.99	7.5
ARNT2	0	0	0.00343	0	0.0193	0.0293	0	0.0176	0.00376	0	0.00339	0	0.00987	0.00808	0.0087	0.00206	0.0125	0.0991	0	0.00703	0.00297	0.0103	0	0.0119	0	0	0.0317	0.00418	0.00478	0.00238	0	0.00297	0	0	0.00781	0.00443	0.0027	0	0.00442	0.0125	0.00257	0	0.00167	0.00477	0.00205	0.00929	0.00162	0.00484	0.00575
ARNTL	12.7	15.7	15.6	20.4	18.3	28.6	15.9	13.9	21.4	11.9	12.7	13.1	12	11.3	14.5	12.5	17.8	13.5	15.2	10.3	12.6	20.2	16.2	16.5	19.8	26.3	29	10.9	10.7	14.4	9.85	13.2	11.6	19.2	19.9	10.9	10.6	13.8	10	20.7	20	8.7	10.3	13	19	12.7	13.3	9.54	11.3
ARNTL2	0.101	0.103	0.0785	0.0916	0.0475	0.0723	0.121	0.0908	0.0729	0.168	0.0478	0.116	0.0957	0.0736	0.102	0.0617	0.108	0.106	0.141	0.0631	0.0393	0.0738	0.0558	0.0901	0.0804	0.0634	0.0335	0.183	0.119	0.138	0.163	0.246	0.171	0.096	0.0849	0.137	0.143	0.0575	0.0507	0.13	0.111	0.344	0.385	0.116	0.159	0.454	0.238	0.0917	0.189
ARPC1A	19.6	21	19	20.1	26.8	21	16.2	21.8	17.5	16.7	15.5	18	20.4	19.2	18.2	17.9	21.1	33.4	17.1	18	28.7	19.8	15.3	18.6	14.6	28.6	29.4	13.6	16.6	14.9	15.7	18.2	26.5	26.9	19	15.6	13.9	20.6	20.4	23	22	14.6	19.6	17.5	15.1	19.9	15.9	18.4	16.5
ARPC1B	439	434	341	478	620	331	245	338	243	338	278	359	409	586	323	326	389	733	391	375	695	387	273	325	293	485	434	179	310	247	298	360	603	451	249	255	277	404	339	363	334	239	403	269	298	370	277	299	280
ARPC2	462	523	287	479	600	415	292	467	356	318	311	423	381	482	361	301	443	694	331	275	533	422	284	424	324	656	667	261	299	241	308	407	537	618	355	318	269	417	432	455	371	296	296	344	350	332	289	352	351
ARPC3	140	175	114	155	211	142	108	178	126	119	104	136	149	167	131	103	191	286	98.5	96.9	202	168	94.6	141	114	257	215	84.9	113	67.7	113	131	212	224	115	103	97.5	151	154	171	111	94.4	104	114	115	116	91.3	113	117
ARPC4	204	186	182	168	290	164	116	185	121	156	124	168	204	225	147	141	200	336	140	152	338	187	115	159	120	203	263	99.1	120	112	130	160	264	270	120	118	98.4	203	196	197	162	105	177	128	124	177	125	143	136
ARPC4-TTLL3	50.1	51.6	48.2	49.8	63.6	55.4	34.2	54	41.2	41.9	35.3	41.3	48.6	50.1	39	38.3	51.7	85	45.1	39.2	56.2	49.3	35.3	49.6	41.5	54.1	77.5	25.8	30.4	32.4	32.7	40	45.9	64.9	41.2	32.9	27.6	52.9	53.3	52.6	49.2	33.4	43.8	33	40.2	39.9	35	40.9	35.3
ARPC5	149	184	151	221	368	208	127	247	117	134	105	160	155	128	173	119	214	233	84.6	120	146	210	103	180	129	265	385	95.9	136	106	123	135	149	268	145	105	99.4	166	170	281	279	116	134	111	150	162	145	157	100
ARPC5L	22.3	24.8	16.6	22.6	19.8	18.2	26.9	24.2	21.4	19.1	26.1	29.3	32.4	24.3	22.3	28	24.3	14.9	37.7	23.1	30	19	24.9	28.5	20.9	16.6	14.6	21.1	18.1	28.7	23.6	33.2	33.3	31.9	15.3	21.7	22.5	19.3	24.7	16.2	13.9	21.3	24.3	24.7	18.4	27.6	24.6	21.3	31.2
ARPM1	0.065	0.294	0.0224	0.085	0.0252	0.125	0.022	0.0329	0.0246	0.0457	0.0444	0.0253	0.0431	0.0529	0.0641	0.00673	0.0408	0	0.0969	0.0414	0.0292	0.028	0.0506	0.0948	0.0193	0.0428	0.0207	0.041	0.0261	0.0545	0.0374	0.136	0.047	0.0356	0.0426	0.0797	0.0707	0.0427	0.0362	0.00819	0.0505	0.0527	0.0491	0.052	0.047	0.0912	0.0742	0.0712	0.0627
ARPP19	10.6	12.2	11.6	12	17.1	13.9	10.8	14.1	10.6	11.7	9.33	11.1	9.92	7.41	12.2	10.7	11.4	12.2	9.32	10.3	10.7	13.6	10.9	12.8	11.6	13.6	18.3	13.2	11.9	11.7	11.3	11.5	10	12.6	12.7	12.2	9.99	9.34	11	15.7	14.3	12.9	10.2	11.5	12.8	10.6	11.3	12.3	11.4
ARPP21	0	0	0.00654	0.00551	0.00368	0.0224	0.00481	0.0479	0.0144	0.0178	0.00162	0.0203	0.00628	0.00771	0.0083	0.00982	0.00953	0	0.00283	0.00536	0.0114	0.0326	0.0188	0	0.00562	0.00624	0.00907	0.00266	0.0198	0.00908	0	0	0	0	0	0.00211	0.00258	0	0.00844	0	0.00736	0.00236	0.00159	0.00152	0.00783	0	0	0.00462	0.00548
ARR3	0.119	0.09	0.189	0.304	0.116	0.235	0.185	0.264	0.405	0.268	0.221	0.126	0.181	0.054	0.174	0.134	0.0375	0.186	0.267	0.183	0.194	0.137	0.275	0.222	0.192	0.213	0.206	0.217	0.0719	0.31	0.114	0.223	0.162	0.0546	0.326	0.122	0.291	0.131	0.122	0.125	0.18	0.199	0.209	0.191	0.123	0.14	0.268	0.291	0.182
ARRB1	15.9	12.4	23.7	12.3	17.9	10.7	12.3	11.5	9.06	20.3	14.5	15.9	22.1	24.2	16.2	13.9	19.3	22	15.1	18.8	22.9	23.3	12.8	12.1	13.7	9.19	14.6	13.5	18.4	14.8	16.2	12.2	19.3	10.4	8.47	12.2	12.6	18.3	14.3	15.7	15.7	11.6	21.8	14.7	14.7	14.5	12.2	17.2	10.4
ARRB2	498	345	376	421	732	494	200	367	311	302	215	282	374	427	295	218	362	904	269	269	484	358	186	330	259	531	650	128	252	205	179	251	435	575	322	207	147	422	485	468	470	176	292	205	290	279	194	283	192
ARRDC1	50.7	62.7	56.6	88.1	83.3	51.4	40.2	55.5	50.7	50.5	42.5	49.6	57.7	70	55.4	49	43.2	68.6	78.6	47.3	75.2	55.7	43.1	56.7	54.9	46.6	60.8	22.7	35.9	41.4	32.6	42.6	82.6	78.7	33.2	42.5	34.1	62.1	50.3	44.2	44.8	40.5	51.1	37.5	42.9	54.3	34.9	53.4	39.2
ARRDC2	29.1	28	29.8	26.5	28.2	24.1	26.6	29.1	26.6	29.9	34.6	32.4	33.4	33	33	34.9	30.2	28.5	54	34.6	34.1	27.5	32.1	29.4	24.9	26.5	26	25.2	30.7	32.4	26.9	28.5	31	28.8	17.2	32	29.3	35	35.6	20.9	24.1	22	29.4	30.4	24.8	26.6	24.9	35.7	27.8
ARRDC3	62.9	57.7	29.7	41.7	35.9	56	29.4	51.5	56.9	31	34.2	35.6	18.6	17	37.3	26.8	29.9	37.6	19.9	20.1	13.6	46.1	39.6	40.9	30.3	56.2	107	25	41.4	33.6	26.1	38.9	33	46.2	92.6	43.3	30.3	24.2	25.9	103	86.1	36.9	27.5	40.6	41.6	51.9	26.3	29.5	28
ARRDC4	9.69	3.95	3.53	6.4	3.52	4.8	3.4	1.8	2.54	6.65	2.75	9.35	3.97	2.39	5.29	2.28	6.35	6.14	2.21	2.05	2.22	4.01	5.11	5.16	2.23	10	5.74	2.87	4.19	4.97	2.22	1.87	1.61	1.02	1.98	1.97	4.18	4.64	2.27	9.03	7.04	3.6	2.66	5.23	2.59	3.37	4.41	2.05	1.95
ARRDC5	1.32	1.87	1.5	2.02	1.6	1.34	1.47	2.1	2.51	1.57	2	2	2.7	1.51	2.72	2.28	1.4	1.21	1.77	2.31	2.16	1.15	2.17	2.29	1.32	1.37	1.12	1.78	2.22	2.28	1.51	1.82	2.56	2.34	1.3	2.32	1.49	2.23	2.28	1.22	1.71	1.6	1.93	1.72	1.32	1.84	1.26	2.79	2.36
ARSA	26.4	22.1	28.7	34.5	37.3	26.5	19.5	26.5	20.9	17.4	15.4	17.5	25.3	29.4	21.2	21.2	21.1	33	22.5	18.9	29.5	20.4	14.8	33.4	24.5	28.3	38.3	8.05	10.7	18.9	14.3	17.8	30.4	29.6	19.1	17.1	9.33	26.2	18	27.7	27.7	17.1	24.5	14.9	21	22	15.8	19.1	14.8
ARSB	2.89	2.99	2.48	2.9	3.03	2.6	2.02	1.61	2.1	2.86	1.5	2.02	1.87	1.85	1.98	1.7	2.57	2.9	1.69	1.74	2.16	2.82	1.61	2.29	1.73	2.35	3.15	1.87	2.63	2.16	1.84	2.68	2.35	4.09	3.71	2.13	2.21	2.51	2.11	4.95	4.25	2.56	2.2	2.08	3.33	3.75	2.89	1.74	2.41
ARSD	4.59	4.48	4.51	3.57	2.98	4.09	2.9	2.65	3.28	6.43	2.94	3.19	4.43	4.7	3.03	2.68	3.73	7.36	3.22	5.83	6.06	4.59	2.69	3.33	2.24	4.06	4.59	3.06	4.13	4.61	3.51	2.79	5.59	4.39	3.19	2.85	3.72	4.14	2.93	5.18	4.82	3.85	5	3.76	3.58	7.17	5	2.61	3.73
ARSD-AS1	5.7	6.11	6.29	4.38	3.01	5.27	4.27	3.66	4.03	8.84	3.85	4.2	5.78	5.87	3.83	3.7	5.01	10.2	3.33	7.87	5.51	6.1	3.43	4.55	3.01	5.59	6.88	4.17	5.51	6.3	4.62	3.53	5.55	5.83	3.78	3.77	4.48	5.58	3.7	6.87	6.61	5.21	7.19	4.94	3.98	9.12	6.47	3.56	5.39
ARSE	0	0.0265	0	0	0	0.00866	0.00993	0	0	0.00687	0	0	0	0	0	0	0.00738	0.0122	0	0.0083	0	0.00505	0.00831	0.00504	0	0	0	0	0	0	0	0.00878	0.0106	0	0	0.00655	0	0.00551	0	0	0	0	0	0	0.00606	0	0	0	0
ARSF	0	0	0.00957	0	0	0	0.00938	0	0	0	0	0	0	0.00752	0	0	0	0	0	0	0.0166	0.0191	0	0	0	0	0	0	0.0089	0	0	0.00829	0	0.0101	0	0.00619	0	0	0.00618	0.00699	0.0144	0	0.014	0.00444	0	0	0	0	0.00535
ARSG	7.52	10.8	8.85	15.3	11.3	12.4	4.88	8.97	10.8	7.07	7.81	6.76	5.84	6.56	4.79	5.92	7.52	11.8	6.56	5.59	8.03	8.84	6.91	8.66	9.46	10.6	15.4	4.36	5.6	6.16	4.16	5.49	6.55	11.7	10.1	5.52	5.35	7.83	8.38	12.8	9.27	6.79	6.61	5.31	7.89	6.74	6.19	6.71	4.21
ARSH	0	0.0349	0.02	0	0.0299	0.0228	0.013	0.00976	0.0073	0.00904	0	0.0075	0.0511	0.0523	0	0.016	0.0194	0.0321	0	0.0273	0.0346	0.00664	0.00546	0.0199	0.0229	0.0127	0.0123	0	0.0248	0.0185	0.00887	0	0.0139	0	0	0.0086	0	0	0.00859	0.0194	0.00998	0.00481	0.0324	0.0185	0	0.018	0.0189	0	0
ARSI	0.00822	0.0186	0.0177	0	0	0	0.0104	0.0104	0.00389	0.00964	0.0141	0.024	0.0136	0	0.00901	0.0128	0.00517	0	0.0123	0.0204	0.0246	0.0212	0.0262	0.0141	0.0244	0.0203	0	0.0202	0.0198	0.0296	0.00946	0.0246	0.0149	0.0226	0.00539	0.0275	0.0112	0.0232	0.0275	0.0104	0.0106	0.00769	0.0138	0.00987	0.0213	0.00962	0.0201	0.01	0.0357
ARSJ	0.00557	0	0.00721	0.0324	0.0054	0.00411	0.00471	0.0106	0.0264	0.013	0.0214	0.00542	0	0.0151	0.0122	0.0144	0.0035	0.0116	0.0125	0	0.00417	0.0288	0.0316	0.00956	0.0103	0.0183	0	0.0274	0.0134	0.00334	0	0.00833	0.0101	0	0.0073	0.00311	0.0208	0.00785	0.0062	0.0351	0.0108	0.00174	0.00468	0.0111	0.0201	0.00651	0.00454	0.017	0
ARSK	0.475	0.537	0.38	0.634	0.332	0.563	0.715	0.557	0.774	0.52	0.612	0.614	0.349	0.354	0.631	0.626	0.362	0.146	0.563	0.479	0.274	0.57	1.03	0.679	0.745	0.417	0.428	1.16	0.794	0.709	0.623	0.746	0.394	0.242	0.577	0.83	0.771	0.355	0.473	0.437	0.564	0.709	0.298	0.66	0.716	0.501	0.632	0.731	0.515
ART1	0.0199	0.0225	0.0428	0.0433	0.0193	0.0147	0.0252	0.0377	0.0564	0.0465	0.00848	0.0193	0.0658	0.0269	0.0109	0.0206	0.0125	0.0619	0.0296	0.0211	0.0149	0.00855	0.0211	0.0256	0.0221	0.049	0.0317	0.0139	0.00797	0.0119	0.0114	0	0	0.0181	0.026	0	0.00675	0.028	0.0111	0.0125	0.0386	0.00619	0	0.0159	0.0308	0	0.0243	0.0242	0.0383
ART3	0	0.0172	0.00657	0	0	0	0.00645	0	0	0	0	0	0	0	0	0.0079	0.0192	0	0	0.0108	0	0	0.0054	0	0.0113	0	0.0122	0	0	0.00913	0	0	0	0	0	0.0085	0.00518	0	0	0.00961	0	0	0.00641	0.0061	0	0	0.00622	0	0.0441
ART4	0.152	1.27	0	0	0.0369	0	0.00804	0	0.018	0.0223	0	0.0277	0.0157	0.0129	0.0208	0.0197	0.0119	0.0198	0.085	0	0.0142	0.0164	0	0.00816	0.0211	0.0156	0.0152	0.0133	0.00763	0.0228	0.0219	0	0.0515	0.0174	0.0623	0.0424	0.0194	0.0178	0.0212	0.012	0.0246	0	0	0.0076	0.0196	0.0556	0	0	0.0183
ART5	0.0167	0.0189	0.00719	0.0364	0.0324	0.0123	0	0.0211	0.0237	0.0293	0.0214	0	0.0276	0	0.0274	0.0173	0	0	0.0124	0.0177	0.025	0.0144	0.00591	0.00716	0.0494	0.0274	0.0133	0.0117	0.0201	0	0.0192	0	0	0	0.0109	0	0.00567	0.0157	0.0279	0.0105	0	0.0104	0.00701	0.02	0.0172	0	0.0068	0.0102	0.0241
ARTN	0.0268	0.0152	0.0578	0.0877	0.052	0.0297	0.0227	0.0509	0.0698	0.0628	0.0572	0.0587	0	0.0545	0.044	0.0833	0.0168	0.0836	0.11	0.0284	0.0201	0.0173	0.0332	0.023	0.0596	0.0882	0.0107	0.0188	0.0376	0.0642	0.0617	0.0702	0.0484	0.049	0.0264	0.00747	0.0501	0.0252	0.0597	0.0422	0.052	0.0292	0.0451	0.0536	0.0208	0.0313	0.0219	0.0408	0.0388
ARV1	3.7	4.99	2.19	2.4	2.19	2.49	3.78	2.9	3.68	3.53	3.93	3.12	2.7	3.88	2.87	2.6	2.63	2.74	4.3	2.86	2.27	2.62	3.81	3.33	3.31	3.26	1.71	4.79	3.89	3.02	3.96	4.4	5	3.44	3.78	4.32	5.46	2.73	2.03	2.35	2.33	3.95	2.9	6.22	2.72	3.92	3.15	3.23	6.29
ARVCF	1.01	0.817	0.507	1.04	0.908	0.405	1.63	2.15	0.584	0.609	2.02	0.813	2.02	1.33	0.605	1.02	0.811	0.302	1.36	0.612	1.04	1.4	1.03	0.698	1.11	0.526	0.808	0.684	0.868	1.06	0.969	1.23	0.612	1.13	0.326	0.734	0.871	0.724	0.992	1.2	0.276	0.634	0.803	1.11	0.964	0.498	1.01	0.566	1.04
ARVP6125	0	0	0	0	0	0	0	0	0.00815	0	0	0	0.0143	0	0	0	0	0	0	0	0	0.00741	0.0244	0	0.0128	0	0	0	0	0	0	0	0	0	0	0	0	0	0	0	0	0	0	0	0	0	0	0	0.0083
ARX	0	0	0.00781	0	0	0	0.00383	0.0115	0	0	0	0	0.00751	0	0	0	0	0.00942	0	0	0	0.0078	0	0.00778	0.0101	0	0	0	0	0	0	0.0135	0.00818	0.00828	0	0	0	0.00425	0	0	0	0.00847	0	0.00362	0	0	0.00739	0	0
AS3MT	0.633	0.764	0.697	0.707	1.03	0.756	0.742	1.06	1.18	1.01	1.13	1.02	0.341	1.25	1.01	1.38	0.763	1.3	1.07	0.459	0.443	0.805	0.991	1.8	0.998	0.93	1.42	0.923	0.619	0.74	0.887	0.426	0.754	1.24	0.734	1.4	0.715	1.71	0.465	0.499	0.321	0.514	1.07	0.359	0.818	0.593	0.646	0.598	0.586
ASAH1	97.7	129	95	211	141	187	77.9	137	131	127	58.4	98.1	64.9	87.8	87.2	74.3	88.5	129	65.7	56.2	105	130	84	147	82.9	159	200	56.8	91.9	66.9	56.8	93.3	99	155	125	71.3	74.9	111	83.8	183	139	69	83	90	103	114	85.8	71.6	66.9
ASAH2	0	0	0	0	0	0.00795	0.00456	0	0	0.00631	0.0046	0.00524	0.00893	0.00731	0	0	0	0	0	0	0	0	0.00763	0.00462	0.00799	0	0.00859	0.00378	0	0.00646	0	0	0	0	0.00706	0	0.00366	0.00506	0	0.00679	0.00697	0.00336	0	0	0	0.0063	0	0	0.0052
ASAH2B	0	0	0	0	0	0.0304	0	0	0.0195	0.0241	0.0176	0.0201	0	0	0	0	0	0	0	0.0146	0	0	0.0146	0.0354	0	0	0.0329	0.0289	0.0165	0.123	0.0237	0	0	0	0	0.046	0.028	0.0194	0	0.026	0	0	0	0	0	0	0	0	0
ASAP1	26.4	22.6	19	15.3	34.8	23.8	12.7	18	15.8	21.7	8.43	16.7	12.4	10.2	15.2	10.4	21.6	38	8.44	15.3	15.2	24.7	10.1	20.8	17.3	35.6	31.7	11.4	12.6	11.5	14	9.95	11.4	11.8	19.9	8.91	7.74	14.3	23.9	36.5	34.2	14	15	9.26	23.5	12.9	17.3	16.8	9.64
ASAP1-IT1	0.0221	0.025	0.0381	0	0.0214	0.0326	0.00935	0	0.0523	0.0129	0	0	0	0	0.0605	0.0115	0.0139	0.0689	0	0.0234	0.0827	0.038	0.0626	0.019	0.0328	0.0364	0.0176	0.0465	0	0.0132	0.0381	0	0	0.0202	0.029	0.0123	0.0225	0	0.0246	0	0.0715	0.00689	0.0186	0.00884	0.114	0	0.027	0.0269	0.0213
ASAP2	0.528	0.18	0.419	0.169	0.751	0.282	0.422	0.153	0.324	0.456	0.306	0.417	0.287	0.253	0.27	0.248	0.361	0.246	0.319	0.222	0.351	0.447	0.424	0.303	0.37	0.592	0.451	0.502	0.327	0.363	0.425	0.344	0.161	0.2	0.582	0.244	0.229	0.15	0.335	0.6	0.507	0.215	0.469	0.128	0.61	0.277	0.221	0.28	0.358
ASAP3	0.238	0.106	0.352	0.1	0.14	0.0926	0.218	0.0992	0.11	0.162	0.238	0.232	0.26	0.306	0.162	0.224	0.181	0.13	0.267	0.34	0.113	0.154	0.28	0.0943	0.153	0.129	0.12	0.258	0.247	0.173	0.307	0.0845	0.147	0.115	0.165	0.301	0.122	0.194	0.213	0.119	0.134	0.113	0.504	0.203	0.156	0.0954	0.307	0.298	0.127
ASB1	4.15	4.14	4.35	5.04	3.36	5.14	5.01	4.7	5.76	4.31	5.29	4.59	5.66	3.71	4.75	5.1	4.12	4.31	7.28	5.66	4.33	4.23	5.66	5.14	5.22	3.99	4.02	5.54	4.64	5.08	4.39	4.47	2.69	4.15	3.69	4.84	5.08	4.15	4.87	2.91	3.11	4.59	4.1	4.73	4.34	4.14	3.97	5.13	4.35
ASB10	0	0.0127	0	0.00818	0	0	0	0	0.00533	0.00659	0	0	0.00933	0	0.0185	0.00583	0.00707	0.0117	0	0.00398	0.0169	0	0	0.00483	0.0125	0.00926	0.0179	0.00395	0.00452	0	0.00647	0	0.0102	0.0103	0	0.00628	0.00383	0	0	0	0.0291	0.00702	0.00946	0.0045	0.00581	0	0	0.0137	0
ASB11	0.00871	0	0.00376	0.0127	0.00845	0	0	0	0.00412	0	0	0	0	0	0	0	0	0	0	0.00616	0	0	0.00617	0	0	0	0	0	0.00699	0	0	0	0	0	0	0	0.00592	0.00409	0	0.00549	0	0	0.00366	0	0	0	0.0142	0	0.0042
ASB12	0.0201	0	0.0434	0.103	0.0782	0	0.0511	0.0255	0.0382	0.0236	0.0602	0.0294	0.0334	0.0957	0	0.0209	0.114	0.0419	0	0.107	0.0603	0.026	0.0143	0.0432	0	0	0.0321	0.0283	0.0404	0.0483	0.0116	0.0151	0.109	0.0368	0.066	0.0337	0.11	0.0568	0.0224	0	0	0.044	0.00847	0.0242	0.0208	0	0.0164	0.0614	0.0292
ASB13	2.81	3.12	4.97	3.29	3.63	4.07	2.81	3.63	3.22	4.42	4.26	5.06	4.37	6.92	4.12	4.51	5.05	4.91	4.56	4.84	6.27	4.68	4.82	3.07	3.34	3.04	3.08	4.8	4.08	3.46	2.92	3.21	4.79	2.32	2.79	3.5	4.65	4.84	3.18	2.48	3.61	2.71	4.11	4.24	2.87	4.24	3.88	5.11	2.22
ASB14	0.528	0.367	0.504	0.461	0.276	0.605	0.605	0.581	0.811	0.614	0.468	0.62	0.39	0.331	0.587	0.514	0.449	0.313	0.436	0.537	0.292	0.654	0.857	0.631	0.545	0.428	0.415	0.984	0.668	0.915	0.603	0.352	0.418	0.394	0.948	0.503	0.865	0.305	0.43	0.594	0.541	0.745	0.461	0.64	0.667	0.674	0.875	0.46	0.615
ASB15	0	0	0	0	0.028	0	0.0122	0	0	0	0.00411	0	0	0	0	0	0	0.01	0	0.00341	0.0216	0	0	0	0.00714	0	0	0	0	0	0	0	0	0	0.00631	0.00537	0	0	0	0.0243	0	0	0.00809	0	0	0	0.00393	0.00587	0
ASB16	4.18	3.51	2.59	5.35	2.59	3	2.96	3.45	4.16	2.45	3.73	2.8	3.22	2.72	3.76	3.52	2.35	1.99	4.8	3.77	1.66	2.6	3.51	3.2	3.12	3.5	3.62	1.86	2.75	4.31	2.28	3.42	1.68	3.96	3.66	4.1	2.83	3.24	3.62	2.78	4.1	2.79	3.48	2.87	2.61	2.51	2.87	4.94	3.72
ASB17	0	0	0	0	0	0	0	0	0	0	0	0	0	0	0	0	0.0296	0	0	0	0	0	0	0	0	0.0194	0	0	0	0	0	0	0	0	0	0	0	0	0	0	0	0	0.00989	0	0	0	0	0	0
ASB18	0	0	0	0	0	0	0	0	0	0	0	0	0	0	0	0	0	0	0	0	0	0	0	0	0	0	0	0	0	0	0	0	0	0	0	0	0	0	0	0	0	0	0	0	0	0	0	0	0
ASB2	1.23	1.19	0.995	0.62	0.569	0.456	1.14	1.23	0.389	0.463	1.48	1.37	1.67	0.933	0.754	2.94	1.16	0.512	2.02	1.81	1.29	1.08	1.15	1.41	1.34	0.437	0.405	0.875	0.957	1.55	1.18	1.34	1.23	1.11	0.272	1.55	0.946	4.53	1.98	0.438	0.455	0.751	1.64	0.629	1	0.85	0.516	0.567	2.57
ASB3	3.43	4.16	3.82	4.59	4.2	5.5	4.35	4.27	5.03	4.19	4.38	3.8	3.71	3.06	4.44	4.49	4.35	3.06	3.62	4.04	3.43	4.3	3.52	4.29	3.69	4.24	4.5	4.14	4.02	4.14	3.95	4.67	3.27	3.9	4.39	3.59	3.99	4.13	4.06	4.17	4.49	4.45	3.43	4.15	3.58	3.13	4.12	4.24	4.57
ASB4	0	0	0	0	0.0175	0	0	0.00381	0.00285	0	0	0	0	0	0	0	0.00379	0.00627	0	0.00213	0	0	0	0	0	0	0	0	0	0	0	0	0	0	0	0	0	0.00566	0	0	0	0	0	0	0	0	0	0	0
ASB5	0.00859	0	0	0	0.00834	0	0	0.00544	0.00814	0	0.00367	0	0	0.00583	0	0	0	0	0.00641	0.00304	0	0	0	0	0	0	0	0	0	0.00515	0	0	0	0	0	0	0	0	0	0	0	0	0	0	0	0	0.00701	0	0.00829
ASB6	8.99	7.97	8.15	9.5	9.94	9.06	8.88	9.5	9.28	8.06	9.42	9.21	10.1	9.58	9.13	10.8	8.41	10	13.3	10.3	9.51	10	9.71	9.71	9.5	7.82	9.3	7.47	8.85	8.97	8.06	9.99	9.3	9.16	8.18	8.74	8.51	10.2	8.68	7.15	8.43	8.46	9.57	9	8.32	8.94	8.17	9.42	8.91
ASB7	3.34	3.78	4.25	5.39	5.91	5.85	3.64	4.67	4.54	4.22	2.91	3.55	2.78	2.71	3.67	3.25	4.17	3.84	2.64	3.09	2.28	4.97	3.5	4.81	4.31	4.42	6.86	3.99	3.85	3.19	3.37	3.06	2.21	5.12	4.46	3.17	3.14	3.03	2.98	6.02	4.63	3.89	3.05	3	4.44	3.29	3.56	3.26	2.77
ASB8	17.7	16.2	17.2	19.6	25.8	18.7	13.5	18.1	14	14.1	13.5	16.5	16.5	15.3	16.3	14	19.5	25.7	12.2	15.3	18.1	18.2	13.7	15.9	13.9	22.4	29.4	13.5	14.2	13.6	13.2	13.8	13.9	24.1	16.4	14	12.1	18.6	17.8	25	20.9	13	14.5	13.4	14.3	14.4	12.3	16.1	12.7
ASB9	0.0759	0.1	0.0546	0.0829	0.123	0.0654	0.0428	0.12	0.144	0.289	0.103	0.117	0.0629	0.0343	0.118	0.0197	0.0796	0.171	0.0661	0.0403	0.0853	0.109	0.143	0.0869	0.0469	0.187	0.0707	0.102	0.229	0.0986	0.0655	0.17	0.149	0.0463	0.083	0.0989	0.22	0.0832	0.0423	0.0877	0.0737	0.134	0.0745	0.0557	0.118	0.0814	0.119	0.17	0.0672
ASB9P1	0.128	0.199	0.0622	0.222	0.0311	0.39	0.0543	0.101	0.152	0.103	0.0411	0.0936	0.0664	0.0326	0.0966	0.0415	0.0806	0.133	0.0956	0.0624	0.072	0.0897	0.108	0.172	0.172	0.0791	0.153	0.0844	0.0708	0.0961	0.0369	0.144	0.0145	0.176	0.546	0.0984	0.0382	0.0301	0.134	0.293	0.259	0.135	0.148	0.103	0.282	0.234	0.418	0.137	0.0851
ASCC1	3.22	3.68	3.64	3.88	3.65	3.1	3.18	4.38	3.46	3.28	3.24	3.45	4.6	3.79	2.95	3.07	3.98	4.28	2.66	3.96	4.24	4.21	3.03	3.5	2.68	4.82	4.76	3.8	3.45	3.09	3.78	3.9	3.78	4.89	4.29	3.46	3.58	3.94	3.56	5.75	4.65	3.08	3.82	3.69	3.18	4.4	5.14	3.67	3.91
ASCC2	82.8	114	32.2	42.9	75.7	62.3	24.3	25.1	35.3	54.6	36.6	43.5	87.7	95.1	47.5	40.7	62.2	42	69	34.3	43.7	31.4	22.7	23.1	29.3	39	29.6	23	43.2	53	38.1	60.9	84.8	67.5	38.6	35.8	22.5	31.4	41.1	23.5	27.5	17.5	26.4	22.3	47.6	58.2	41.1	40.6	35.9
ASCC3	1.13	1.11	1.67	0.973	1.27	1.19	1.79	1.52	1.2	1.82	1.59	1.48	1.53	1.53	1.49	1.46	1.75	1.01	1.57	1.97	0.911	1.78	1.85	1.53	1.69	1.18	0.923	2.38	2.23	2.27	2.23	1.4	1.47	1.2	1.67	1.74	1.95	1.3	1.59	1.8	1.95	2.2	1.76	1.63	2.36	1.79	2.28	1.56	1.98
ASCL1	0	0.0119	0	0	0	0	0.00444	0	0.00993	0	0.00448	0	0.00869	0	0	0	0.00659	0	0	0.00371	0	0	0	0	0	0	0	0	0.00421	0.0126	0	0	0	0	0	0	0	0	0.00584	0	0.00679	0.00327	0.00881	0.0042	0	0	0	0	0.0101
ASCL2	4.94	2.64	4.4	5.75	6.35	2.03	4.64	4.27	2.11	3	4.18	3.52	5.42	4.62	2.82	2.1	3.58	2.4	28.9	2.73	5.65	4.93	1.91	2.67	2.29	1.82	2.17	1.2	2.77	5.92	4.88	6.02	6.19	6.85	1.68	3.95	3.91	3.26	6.73	4.31	2.76	4.59	4.91	4.6	2.34	7.06	3.71	4.08	8.83
ASCL3	0	0	0.0346	0	0	0.0296	0.017	0	0	0.0235	0	0.0195	0	0	0	0	0	0	0	0	0	0.0173	0	0.0172	0	0	0	0.0141	0	0	0	0	0	0.0366	0	0.0224	0.0273	0	0	0	0	0.025	0.0505	0	0	0.0234	0.0327	0	0
ASCL4	0.0115	0	0	0.00838	0	0.0255	0	0.00729	0	0	0	0.0112	0.00955	0	0	0	0.00725	0	0	0.00408	0.0173	0	0.00408	0	0	0.00948	0	0.00405	0	0	0	0	0	0	0	0	0.0118	0.00541	0	0	0.0149	0	0	0.00922	0	0	0	0	0
ASF1A	4.74	5.62	3.73	4.97	3.56	5.87	7.21	5.84	6	5.78	6.46	7.04	5.03	4.88	6.46	7.85	4.86	2.56	5.2	5.69	3.72	4.46	8.47	5.49	6.1	3.59	3.44	10.3	6.81	6.34	7.2	8.02	4.65	3.39	5.65	7.5	8.66	4.98	5.29	4.13	4.37	7.46	4.24	7.76	5.16	5.42	5.58	7.72	6.46
ASF1B	8.82	9.14	19	24.9	41.5	13.6	5.5	13.5	11.9	8.28	6.27	11.6	12.5	13.7	13.6	8.81	11.7	11.4	5.23	8.2	16.1	25.8	6.03	10.4	8.35	11.6	21.5	3.53	8.56	5.17	6.6	11.4	8.48	15.8	5.37	4.79	3.31	11	10.6	13.5	13.2	6.62	8.48	5.38	5.58	6.19	9.52	8.78	5.15
ASGR1	7.12	8.62	8.15	4.51	8.23	6.89	5.56	4.59	4.31	12.9	7.23	9.07	10.7	16.9	8.12	6.73	9.92	12.2	10.9	8.36	22	6.92	6.54	7.61	4.72	5.87	4.43	4.88	8.06	6.55	5.9	8.58	19	4.37	3.32	5.08	9.85	12.9	6.36	4.9	6.25	8.04	9.91	11	4.34	11.4	5.53	7.77	6.12
ASGR2	17	10.2	12.1	8.04	15.9	8.58	6.13	6.96	4.35	17.2	7.41	12.1	14.4	20.4	13.2	16.4	19	29.3	16.9	21.1	33.2	7.31	12.4	12	13.3	10.9	4.53	8.89	11.7	7.38	7.75	7.85	31.8	5.77	5.83	9.05	17.3	15.1	7.81	12.7	12.4	15.4	13	13.2	5.95	19.7	11.4	6.61	6.7
ASH1L	3.81	3.36	4.85	4.99	4.67	6.23	4.26	4.17	5.69	4.19	3.86	3.48	2.81	2.42	3.86	3.78	3.9	3.82	3.14	3.58	2.07	4.84	4.59	4.66	5.37	5.89	6.12	4.69	4.42	4.34	3.63	2.98	1.78	3.33	6.17	3.95	4.11	2.56	3.23	6.74	5.97	4.38	3.15	3.53	6.44	3.91	4.93	3.09	3.24
ASH2L	14.7	13.9	11.7	12.3	16.4	10.8	9.92	9.97	8.65	9.88	9.35	10.5	11.7	12.3	9.38	10.1	14.5	18	8.36	11.2	14.5	14.9	9.46	9.42	8.53	12.9	16.7	11	11.3	10.7	12.8	9.46	15.7	16.2	12.4	9.68	10.1	12.5	11.8	18.9	16	10.8	13.5	10.5	10.1	12.8	13.1	10.3	11.3
ASIC1	0.165	0.137	0.251	0.064	0.0587	0.114	0.0489	0.08	0.0729	0.0806	0.23	0.0883	0.0547	0.0709	0.238	0.117	0.114	0.0858	0.0369	0.22	0.144	0.0568	0.0779	0.0472	0.177	0.0498	0.0219	0.438	0.344	0.0297	0.199	0.107	0.0696	0.101	0.238	0.46	0.178	0.093	0.129	0.101	0.267	0.13	0.0878	0.354	0.0227	0.0482	0.0673	0.503	0.0955
ASIC2	0	0	0	0	0	0	0	0	0	0	0	0	0	0	0	0	0	0	0	0	0	0.00262	0	0	0	0	0	0	0	0	0	0.00456	0.00551	0	0	0	0	0.00286	0	0	0	0.0038	0	0	0	0	0	0	0.00294
ASIC3	0.788	0.598	1.18	0.786	0.732	0.864	0.748	0.769	0.762	0.884	1.21	0.887	1.14	1.45	0.98	1.49	0.524	0.492	1.27	1.22	0.995	0.591	0.973	0.575	0.976	0.686	0.395	0.609	0.813	1.57	0.764	0.69	0.966	0.844	0.494	1.58	0.628	1.26	1.42	0.454	0.809	0.776	0.766	1.17	0.762	1.11	0.895	1.85	0.82
ASIC4	0	0.0305	0.00775	0	0	0	0.0076	0.0227	0.00425	0.0158	0.0307	0.0175	0	0.0122	0	0.0186	0.0113	0.0187	0.0201	0.0191	0.00672	0.00387	0.00318	0.0116	0.00333	0	0	0.0063	0.018	0.0215	0.00517	0	0.00811	0.0164	0.00589	0.01	0.00611	0.0169	0.04	0.00566	0.0116	0.0084	0.0189	0.00718	0.00928	0.0158	0.0146	0	0.026
ASIC5	0	0	0	0.0448	0	0	0	0	0	0	0	0.00749	0	0.0104	0	0	0	0	0.0115	0.0109	0	0	0	0	0	0	0	0.0108	0.00618	0	0	0.023	0	0	0	0	0.0105	0	0	0	0	0.0048	0.00647	0.0246	0	0.009	0.0188	0	0
ASIP	0.0446	0.202	0.231	0.0649	0.0433	0.132	0.208	0.226	0.127	0.47	0.229	0.239	0.037	0.0605	0.0489	0.139	0.28	0.0464	0.0998	0.142	0.267	0.154	0.221	0.0383	0.0661	0.184	0.0711	0.0783	0.215	0.134	0.0513	0.3	0.242	0.0815	0.205	0.149	0.152	0.209	0.149	0.112	0.0577	0.0417	0.112	0.125	0.115	0.261	0.0364	0.0544	0.215
ASL	9.87	9.52	11.6	19.1	14.7	12.4	7.29	11.7	12	9.37	8.92	9.02	13.7	12.7	7.94	9.64	8.08	17.1	12.8	9.59	18.4	10.8	7.4	10.1	6.4	12.1	18.1	5.97	7.56	8.04	7.59	9.19	17.2	16.6	10.3	6.14	7.93	11	9.03	10.7	9.55	7.39	10.7	9.44	7.45	12.5	10.3	8.36	9.84
ASMT	0.0367	0.0623	0.0633	0	0	0.0271	0.0388	0.0116	0.0435	0.043	0.0549	0.0893	0.0456	0.0747	0.0704	0.00951	0.0115	0.0191	0.0274	0.0584	0.0275	0.0316	0.039	0.0315	0.034	0.0906	0	0.0129	0.0368	0.022	0.0106	0.0412	0.0829	0.0336	0.0361	0.0819	0.0499	0.0431	0.0307	0.0347	0.0238	0.0286	0.0463	0.022	0.0474	0.0537	0.00749	0.0783	0.0177
ASMTL	1.59	0.905	1.54	1.7	2.51	1.83	1.42	1.4	1.38	1.51	1.37	2.23	1.79	2.61	1.89	1.68	1.61	3.19	1.65	1.91	3.02	1.56	1.36	1.43	1.39	1.95	1.87	1.19	1.4	1.43	1.79	1.54	2.52	1.78	1.12	1.07	1.2	1.72	1.98	1.3	1.24	1.24	1.67	1.36	1.06	1.69	1.32	1.17	1.45
ASMTL-AS1	0.173	0.127	0.231	0.207	0.36	0.261	0.205	0.224	0.217	0.268	0.225	0.328	0.336	0.498	0.27	0.295	0.25	0.458	0.316	0.241	0.491	0.245	0.19	0.196	0.192	0.27	0.351	0.155	0.194	0.243	0.189	0.239	0.507	0.371	0.181	0.178	0.156	0.345	0.322	0.163	0.257	0.202	0.279	0.228	0.205	0.257	0.204	0.226	0.217
ASNA1	39.7	41.6	36.6	29.3	43.8	25.9	25.4	25.2	19.7	29.1	28.5	31.1	47.2	49.7	29.5	30	35.8	46.7	35	34.7	59	33	23.2	25.1	22.9	30	28.2	24.1	29.2	28.8	32.9	37	55.2	45.1	20.6	24.9	28	37.8	32.1	28.5	28.1	25.2	38.1	29.2	23	40	29.3	27.2	36.7
ASNS	4.81	4.43	4.96	4.69	4.37	3.83	8.03	4.24	5.03	3.66	7.98	5.27	5.31	5.18	5.5	5.96	4.68	4.6	5.75	7.34	3.78	4.85	5.56	5.18	6.05	4.65	3.22	5.97	4.71	5.22	7.38	4.6	4.11	3.99	3.34	5.7	3.78	4.77	7.12	3.49	4.13	4.58	4.48	6.29	3.74	2.91	3.81	7.29	7.38
ASNSD1	9.75	9.43	5.66	11.5	7.58	10.4	7.94	11.1	10.4	10.2	9.98	9.4	4.45	8.19	9.04	8.66	8.66	6.45	6.65	6.16	3.73	8.12	9.61	11.2	8.35	13.7	7.17	11.8	12	5.88	5.93	8.59	10.3	8.24	11.4	11.6	9.87	7.3	5.04	12.4	5.51	8.33	3.45	11.5	8.9	6	5.45	8.23	7.56
ASPA	0	0	0.00758	0	0	0.0259	0.0149	0	0	0	0.0075	0.00855	0	0	0.00962	0.0091	0	0	0.0131	0.0124	0	0	0.00622	0	0.0195	0	0.014	0	0	0	0	0	0	0	0	0	0	0	0.0196	0	0	0.0164	0	0.00703	0	0	0	0.0214	0.00847
ASPDH	0.414	0.375	0.42	0.407	0.342	0.291	0.368	0.734	0.608	0.376	1.23	0.665	0.395	0.169	0.272	0.333	0.43	0.215	0.927	0.433	0.248	0.366	0.558	0.658	0.591	0.29	0.595	0.269	0.433	0.36	0.548	0.279	0.187	0.152	0.299	1.33	0.578	0.282	0.392	0.366	0.148	0.439	0.575	0.439	0.3	0.364	0.321	0.53	0.47
ASPG	0.0264	0.119	0.0114	0.048	0	0	0.00559	0	0	0.031	0.0395	0.0129	0.0109	0.00896	0.00724	0	0.0083	0	0.00985	0.028	0	0.00569	0	0.0113	0.0245	0.0109	0	0.00464	0.0053	0.00792	0.0076	0.0198	0.0239	0.0604	0.00866	0	0.0135	0.0124	0	0.00832	0.0684	0.0206	0	0.0106	0	0	0.0215	0.0241	0.0127
ASPH	2.31	3.37	1.37	11.7	4.06	9	1.45	2.79	4.3	2.35	0.936	1.37	0.75	1.27	1.17	1	1.53	4.63	0.588	1.08	0.81	1.94	2.16	2.64	2.22	18.7	9.24	0.948	1.35	0.641	0.85	1.63	1.41	7.93	8.04	1.38	1.24	1.07	2.2	9.37	6.21	0.968	1.6	1.06	2.3	3.08	2.58	2.07	1.23
ASPHD1	0.0352	0.0598	0.0304	0.103	0.154	0.052	0.0447	0.0557	0.0334	0.0103	0.0376	0.0171	0.073	0.0837	0.0579	0.0731	0.0554	0.0733	0.0394	0.0935	0.172	0.0607	0.0187	0.053	0.0261	0.0435	0.0422	0.0619	0.0212	0	0.0101	0.0395	0.0796	0.0644	0.0231	0.0295	0.0719	0.0993	0.0295	0.0555	0.057	0.0769	0.0889	0.0212	0.0364	0.103	0.0359	0.107	0.0425
ASPHD2	2.98	4.12	3.49	1.7	3.62	1.36	5.42	1.56	1.66	2.85	2.78	2.41	3.88	3.01	1.96	2.26	3.15	2.48	4.25	2.28	2.78	2.19	2.37	2.31	2.31	1.33	1.77	2.22	2.84	3.06	2.68	3.58	4.11	6.15	2.72	3.73	2.47	3.36	2.26	3.24	3.9	3.32	4.09	3.1	4.25	3.2	2.83	2.27	5.7
ASPM	0.0766	0.344	0.118	0.0609	0.102	0.0953	0.214	0.0681	0.0578	0.0659	0.048	0.0524	0.0416	0.0178	0.0799	0.0508	0.0556	0.0896	0.0303	0.0592	0.0591	0.0443	0.0466	0.101	0.0567	0.0788	0.0248	0.13	0.0951	0.129	0.391	0.526	0.197	0.252	0.196	0.0627	0.142	0.0303	0.04	0.0709	0.245	0.603	0.156	0.217	0.113	0.231	0.75	0.0802	0.289
ASPN	0	0	0	0	0.02	0	0.00436	0.0196	0	0	0	0	0.0342	0	0.00565	0	0	0.0107	0	0	0.0232	0	0.0073	0.00443	0	0.00849	0	0	0	0	0.00593	0	0	0	0	0.00575	0.00351	0.00969	0.00574	0.0065	0	0	0.00433	0.00413	0	0.00603	0.00841	0.00628	0.00497
ASPRV1	25.6	9.77	11	21.1	20	20.8	11.8	12.8	9.6	4.69	5.25	4.6	12.1	11.5	4.06	6.74	14.4	33.2	5.13	6.97	16.1	16	3.78	7.61	11	23.4	31.5	2.68	6.96	4.77	9.26	12.6	8.85	45	30.3	8.16	1.89	14.3	22.8	26.5	34.2	8.04	12.4	8.5	10	8.54	11	9.96	9.26
ASPSCR1	7.22	4.69	6.78	5.3	5.21	4.43	5.33	5.54	5.06	5.82	7.89	6.52	8.84	10.9	6.8	7.49	5.93	7.05	9.98	8.36	10.4	5.84	6.32	4.98	6.06	5.05	3.55	4.96	6.68	7.14	7.12	6.28	11.7	4.81	4.31	6.02	6.32	9.09	6.79	3.28	4.82	6.15	7.97	6.6	4.5	7.64	6.12	7.71	7.73
ASRGL1	3.48	3.21	3.04	1.07	4.35	1.42	1.71	2	1.65	4.47	1.88	3.35	3.2	4.27	2.96	2.96	3.68	1.99	2.78	3.95	4.05	2.74	2.02	1.96	3.16	1.98	1.55	3.05	2.19	1.77	2.92	2.33	3.49	1.82	1.41	1.77	2.9	6.05	2.93	2.58	1.95	2.61	2.89	2.83	2	2.95	2.36	3.56	2.07
ASS1	0.0423	0.0797	0.0426	0	0.0137	0	0.0239	0.0357	0	0.00826	0.00602	0.0206	0.0117	0.00956	0.0309	0.00731	0	0.044	0.0105	0.0199	0.0106	0.0121	0.02	0.0182	0.0157	0.0232	0.0112	0.0099	0.0113	0.0253	0.0324	0.0422	0.115	0.0515	0.037	0.00786	0.024	0.0132	0	0.0178	0.0365	0.0571	0.0415	0.0226	0.00728	0.0165	0.0115	0.00859	0.15
ASTE1	5.74	3.73	4.67	4.78	5.7	5.39	5.73	5.38	5.16	4.71	6.02	5.9	6.05	5.46	6.31	6.28	6.97	6.37	4.88	6.06	7.11	5.78	5.92	5.22	5.07	6.6	6.17	6.94	6.58	5.32	5.81	5.39	5.11	5.07	4.71	5.8	5.61	6.06	5.76	5.22	4.87	5.28	5.35	5.47	4.65	4.97	5.1	6	5.45
ASTL	0.281	0.159	0.303	0.132	0.136	0.0742	0.119	0.292	0.39	0.294	0.558	0.303	0.217	0.136	0.154	0.344	0.164	0.167	0.24	0.327	0.0753	0.138	0.142	0.207	0.179	0.0662	0.224	0.183	0.29	0.289	0.116	0.195	0.0908	0.129	0.198	0.292	0.191	0.481	0.302	0.076	0.0911	0.144	0.169	0.225	0.125	0.129	0.0984	0.269	0.107
ASTN1	0	0	0	0	0	0	0.0015	0	0	0	0	0	0	0	0.00389	0.00184	0	0	0	0	0	0	0	0	0	0	0	0	0.00142	0	0	0	0	0	0	0	0	0	0	0	0	0	0	0	0	0	0	0	0
ASTN2	0.112	0.134	0.0922	0.0909	0.105	0.0946	0.181	0.0686	0.0903	0.0828	0.131	0.157	0.106	0.127	0.119	0.189	0.0951	0.0718	0.206	0.194	0.182	0.108	0.151	0.12	0.133	0.0703	0.097	0.193	0.157	0.114	0.142	0.18	0.0891	0.0691	0.0604	0.139	0.12	0.17	0.161	0.0518	0.113	0.129	0.108	0.142	0.109	0.0884	0.0831	0.134	0.159
ASUN	3	4.18	2.9	3	2.93	3.08	4.57	3.49	3.34	3.78	4.03	3.7	3.63	2.95	3.98	3.84	3.64	2.23	3.15	3.98	2.15	3.07	3.86	3.84	3.69	2.95	2.57	5.58	4.24	4.27	5.5	5.11	4.14	3.58	3.53	4.22	4.69	3.38	3.54	3.21	3.6	4.83	3.63	4.85	3.65	3.71	4.78	4.44	5.77
ASXL1	6.38	5.71	8.97	7.55	6.92	7.5	8.22	7.57	8.36	7.35	8.8	7.91	7.77	6.7	8.56	8.11	7.52	6	8.32	9.49	6.24	7.44	8.55	7.19	9.18	7.34	6.17	10.2	7.43	9.69	9.02	6.71	5.76	6.41	7.91	8.34	7.81	6.8	7.31	6.13	6.76	8.69	7.79	7.35	8.51	6.35	8.96	8.03	7.68
ASXL2	2.39	1.97	3.7	3.6	2.95	4.61	3.02	2.26	3.73	3.2	2.47	2.55	1.75	1.19	2.77	2.47	2.56	2.06	2.1	2.75	0.685	3.78	3.45	3.22	3.89	3.81	3.8	3.97	3.64	4.4	3.24	1.85	0.515	1.79	4.52	2.84	3.38	1.48	1.75	6.38	5.35	3.55	2.39	2.06	5.82	3.07	4.45	1.97	1.7
ASXL3	0.00341	0.0116	0.00588	0	0.0198	0	0	0	0.00323	0.00399	0.00146	0.00166	0	0.00231	0	0	0.015	0.00709	0	0.00121	0.0102	0.00293	0.00121	0	0.00253	0.00561	0.00272	0.00957	0.0041	0.00204	0.00588	0.0178	0	0.00312	0.0067	0.0057	0	0.0016	0.0114	0	0	0	0.0143	0	0.00881	0.00199	0	0	0
ASZ1	0	0	0	0	0	0	0	0	0	0	0	0	0	0	0	0	0	0	0	0	0	0	0.00306	0	0	0	0	0	0	0	0	0	0	0	0	0	0	0	0.00482	0	0	0	0	0	0	0	0	0	0
ATAD1	3.49	5.01	2.98	4	2.78	4.63	5.34	5.05	5.85	5.1	5.28	4.47	2.7	3.12	3.87	4.53	3.96	1.87	3.78	3.69	1.73	4.73	5.76	5.71	5.33	3.95	4.74	7.83	5.26	5.56	5.47	5.19	3.44	4.05	5.89	6.45	6.56	2.72	3.22	5.22	4.55	6.21	3.18	5.78	6.03	5.13	5.01	4.6	4.29
ATAD2	1.51	1.64	1.32	1.33	0.976	1.28	2.69	1.47	1.65	1.82	1.54	1.54	1.19	0.832	1.49	1.4	1.44	0.935	1.27	1.49	0.662	1.42	2.05	1.75	1.65	1.13	1.15	2.28	1.9	2.46	2.9	2.51	1.56	1.61	2.18	1.75	2.22	0.934	1.24	1.51	1.89	2.96	1.69	2.1	2.27	1.78	3.44	1.31	2.44
ATAD2B	2.03	2.22	1.91	2.5	2.07	2.79	2.56	2.24	3.22	3.3	2.07	2.07	1.23	1.31	2.05	1.93	1.9	1.45	1.8	1.59	1.08	2.42	2.95	2.69	2.71	2.25	2.93	3.33	2.71	2.77	2.17	1.83	1.56	1.76	3.39	2.66	3.45	1.39	1.46	3.58	3.39	3.38	1.95	2.37	3.83	2.63	2.68	1.77	1.95
ATAD3A	1.53	1.31	1.77	1.48	1.37	0.945	1.52	1.2	1.01	1.53	1.76	1.25	1.78	2.76	1.47	2.07	1.52	1.45	2.58	2.13	2.36	1.5	1.41	1.32	1.34	1.09	0.918	1.18	1.58	1.8	1.86	1.63	3	1.5	1.02	1.52	1.8	2.1	1.74	1	1.4	1.68	2.26	1.46	1.06	1.7	1.93	1.85	1.93
ATAD3B	2.47	2.3	2.7	2.51	2.16	1.85	2.92	3	2.27	2.7	3.56	2.95	3.6	3.95	3.23	3.65	2.25	2.05	5.43	3.84	4.06	1.82	3	2.71	3.19	2.03	1.53	1.66	2.6	3.05	2.58	2.83	4.23	2.29	1.65	3.49	2.06	4.02	3.5	1.42	2.18	2.7	3.32	2.91	2.06	2.86	2.43	3.92	3.96
ATAD3C	0.0135	0.0382	0.134	0.0736	0.0458	0.0498	0.0828	0.047	0.0831	0.0554	0.124	0.0657	0.0503	0.128	0.144	0.171	0.0424	0.105	0.0302	0.0812	0.233	0.0988	0.0861	0.0551	0.128	0.0667	0.0592	0.0877	0.0732	0.109	0.136	0.0909	0.213	0.0617	0.0354	0.064	0.0597	0.117	0.0902	0.0468	0.0524	0.0274	0.131	0.0972	0.0628	0.071	0.0716	0.144	0.208
ATAD5	0.267	0.415	0.479	0.373	0.299	0.434	0.572	0.42	0.825	0.579	0.504	0.503	0.387	0.283	0.448	0.45	0.296	0.234	0.296	0.369	0.206	0.357	0.504	0.441	0.484	0.278	0.259	0.624	0.48	0.652	0.533	0.527	0.347	0.374	0.552	0.6	0.594	0.362	0.311	0.402	0.397	0.741	0.391	0.537	0.657	0.461	0.723	0.526	0.487
ATAT1	1.35	1.29	1.6	1.21	1.1	1.26	1.91	1.52	1.64	1.29	1.86	1.45	1.77	1.61	1.69	1.7	1.09	1.24	2.14	1.87	1.28	1.2	1.52	1.49	1.62	1.48	1.24	1.48	1.36	1.54	1.64	1.12	1.12	1.05	1.35	1.72	1.39	1.94	1.84	1.11	1.27	1.55	1.68	1.66	1.42	1.17	1.56	2.08	1.46
ATCAY	0	0.00585	0.00669	0	0.01	0	0	0	0.00245	0	0.00663	0	0.0129	0	0.00567	0.00268	0.00325	0	0	0.00366	0	0.00223	0.0055	0	0.00383	0	0	0.00182	0	0.0062	0	0	0.00935	0.00473	0.00339	0.00866	0.00352	0.00486	0.00288	0	0.0067	0.00161	0.00435	0	0	0.00907	0	0.0063	0
ATE1	1.57	1.71	1.96	2.06	1.66	2.18	2	1.87	1.6	1.8	1.8	1.87	1.04	0.786	1.96	1.55	1.88	1.16	1.11	1.86	0.701	2.26	1.7	2.06	2.11	1.83	1.98	2.87	2.31	2.45	2.01	1.27	0.886	1.34	2.05	1.77	2.35	1.08	1.45	2.67	2.48	2.31	1.74	1.84	2.51	2.05	2.3	1.68	1.48
ATF1	3.42	4.47	4.35	4.88	7.07	4.66	6.14	6.54	5.9	6.98	5.9	5.43	4.46	3.51	5.61	5.96	6.14	4.48	3.73	4.82	2.77	6.25	6.04	5.47	5.88	4.73	6.32	7.55	6	5.46	5.05	5	3.6	4.65	6.14	5.3	7.62	3.96	5.03	6.13	6.69	5.76	4.37	6.37	5.22	5	4.92	6.09	4.81
ATF2	4.4	5.71	4.57	5.89	5.19	6.95	6.4	6.32	6.41	6.76	4.88	5.71	3.18	2.5	5.96	5.52	5.19	3.38	4.68	4.24	2.63	5.65	6.54	6.94	6.34	5.54	7.72	8.19	6.7	6.7	5.65	5.47	3.53	4.93	7.07	7.16	7.38	3.38	3.97	9.92	7.61	7.42	3.88	6.88	7.47	5.85	5.63	5.41	4.65
ATF3	1.77	1.05	0.825	0.24	0.504	0.168	2.73	0.294	0.0969	0.503	0.81	0.371	1.64	0.678	0.259	0.204	0.723	0.385	2.1	0.362	0.295	0.468	0.516	0.355	0.391	0.298	0.301	0.354	1.42	1.24	1.05	2.3	2.23	3.74	2.22	1.64	1.03	0.869	1.03	1.24	1.6	1.06	2.04	1.46	1.66	1.57	1.03	0.902	4.02
ATF4	26.9	31.7	18.7	23	25.6	20.9	16.9	23.8	20.8	23.9	21.1	22.4	21.5	22.6	23.3	23.7	23.2	30.9	26.8	21.4	29.9	20.2	18.6	21.9	21.7	21.4	22.2	22.1	20.8	17.7	23.6	28.2	39.5	25.2	20.9	21.7	23.7	23.1	21.1	18	22.4	26.7	21.8	27.5	18.8	21.5	20.2	24.2	26.8
ATF5	8.87	5.2	9.58	3.09	5.43	3.9	5.92	3.54	3.61	8.22	6.44	6.06	10.3	9.02	5.86	5.94	8.59	7.88	9.81	10.8	9.51	5.76	5.12	4.94	4.61	2.81	3.19	6.24	9.71	8.52	10.5	9.71	13.7	4.54	3.32	8.47	8.22	8.15	7.73	6.14	6.82	9.17	10.5	9.37	6.74	8.56	4.96	8.55	10.3
ATF6	30.4	16.1	20.7	32.6	30.8	48.1	19	18.1	21.8	18.5	11.2	18.8	20.3	21	21.6	11.9	26.1	42.2	13.2	14.8	30.2	23.1	15.8	20.2	22.3	75.5	49.5	13.4	16.5	14.1	14.8	16.8	21.5	25.4	32	14.4	12.9	20.3	22.3	46.5	30.7	12.8	16.7	14.3	27.6	27.6	25.4	16.3	15.5
ATF6B	56.9	39.7	57.7	51.3	71.8	45.9	43.9	41.6	41.9	44.4	42.9	45.9	55.8	54.3	46.6	46.9	51.9	72.2	47.1	58.5	75.2	58	38.8	47.3	41.1	58.4	59.8	33.3	44.3	46.4	45.8	39.1	61.1	61	46.5	37.6	35.7	59	54.6	62.9	55.5	40.7	60.1	40.5	46.6	47.5	45.6	39.9	40
ATF7	4.68	4.16	6.97	5.13	7.29	6.4	5.61	3.92	5.14	4.53	4.08	4.08	4.46	4.12	4.91	3.89	4.75	6.75	4.37	4.97	4.13	5.85	4.6	4.73	5.21	5.31	5.78	4.69	4.59	4.85	5.22	3.97	2.78	5.29	6.76	4.46	4.3	4.02	4.44	8.36	6.75	5.15	5.34	3.95	7.16	5.21	5.8	4.64	4.05
ATF7IP	10.7	7.1	10.7	12.4	14.3	11.9	7.7	7.13	10.5	8.84	7.19	7.51	6.78	7.01	8.78	7.28	7.53	14.6	5.84	8.48	7.7	10.8	9.66	9.19	9.22	9.95	13.2	10.4	9.18	10.8	10.2	7.09	6.55	8.65	17.1	8.15	9.49	6.17	8.43	15.2	16.8	11.2	9.77	7.54	12.6	11	13.9	7.11	8.35
ATF7IP2	2.19	2.01	2.47	1.49	1.17	1.97	3.33	2.04	2.45	2.56	2.75	2.78	1.99	2.18	3.11	3.71	2.21	1.16	1.78	2.75	1.81	1.79	2.73	1.9	2.66	2.59	1.7	3.82	2.5	2.98	3.46	1.99	1.75	1.96	2.39	2.97	2.92	2.73	2.39	1.24	2.21	2.52	2.31	2.82	1.83	1.68	3.06	2.58	2.49
ATG10	0.978	1.01	0.496	1.13	0.563	0.778	0.737	0.925	0.585	0.983	0.73	0.769	0.659	0.788	0.754	0.568	0.723	0.85	0.978	0.548	0.572	0.93	0.815	0.582	0.837	0.814	0.712	0.823	0.876	0.586	0.711	0.828	0.991	1.55	0.959	1.1	0.929	0.656	0.407	0.698	0.807	1.19	0.551	1.14	0.783	0.993	0.513	1.05	0.825
ATG12	5.7	7.59	4.45	6.53	5.07	7.55	7.07	7.51	7.23	7.41	5.8	5.3	4.43	3.66	5.72	5.95	5.73	4.78	5.65	4.25	3.42	5.68	7.14	8.38	6.72	7	9.13	7.36	5.87	6.6	5.28	6	4.81	7.32	7.31	7.31	6.28	4.86	5.16	9.2	8.04	7.35	4.36	7.79	6.53	6.43	5.47	6.34	6.34
ATG13	17.9	14.3	18.7	16.6	26.1	12.9	11.1	13.4	10.3	12.5	11.5	14.1	17	16.5	14.2	13.2	18.6	21.2	12.3	15.7	20.4	17.2	10.8	12.4	11.2	19	20.7	11.7	12.6	12.5	13.3	12.3	17.2	21.7	12.4	11.2	10.2	15.1	17.2	19.8	18.1	10.6	17.2	11.6	12.4	14.9	12.8	12.5	12.5
ATG14	3.6	5.2	3.59	2.78	2.11	3.07	4.06	3.93	3.43	3.83	3.95	4.09	3.61	2.86	3.63	4.12	3.74	2.2	3.8	3.85	2.27	3.08	4.27	3.23	3.93	2.8	3.1	4.71	3.86	4.44	4.04	3.14	2.35	2.69	3.27	4.04	3.96	3.2	3.15	3.25	2.8	3.59	3.46	4.42	3.81	3.94	3.74	4.14	3.87
ATG16L1	9.41	8.65	8.39	9.1	8.7	10.5	11.7	10.3	11.1	8.86	12.8	10.5	10	8.43	10.7	11.9	10.3	8.49	12.8	10.9	9.53	10.8	10.8	13.6	11.7	9.64	10.9	10.7	10.4	11.4	10.2	9.4	7.7	9.37	8.57	10.8	10.1	10	10.2	9.48	9.3	9.22	9.18	10.2	9.39	8.42	9.2	10.6	10.3
ATG16L2	249	278	233	378	397	360	162	251	275	207	156	165	183	204	196	170	188	342	216	123	367	215	142	260	226	332	452	60.1	107	131	98.4	196	333	355	343	146	75.1	275	265	314	366	154	181	133	227	188	138	204	117
ATG2A	16.4	16.9	30.9	30.1	48	16.3	8.91	20.1	19.4	12.4	15.5	11.4	13.7	13.5	17.3	16.3	13.7	23.4	16.6	12.4	16.8	23.8	12.9	16.2	12.9	20.7	66.9	4.38	12.8	13.7	11.2	15.6	17.7	37.9	15.9	11.6	7.26	13.8	15.1	20.3	30	10.1	16.1	9.29	17.7	13.1	8.76	10.9	8.09
ATG2B	3.18	2.14	3.4	3.48	3.06	4.5	3.65	3.22	3.92	3.21	3.09	2.96	2.26	1.57	3.16	2.73	2.85	2.45	2.48	2.86	1.81	3.01	3.26	3.2	3.62	4.24	4.69	3.22	3.12	3.84	2.77	2.25	1.59	2.32	3.97	2.95	2.7	2.09	2.76	4.56	4.08	3.22	2.78	2.72	3.81	2.63	3.33	2.98	2.27
ATG3	52.1	75.8	32.9	49.6	56.4	51.1	45.4	41	40.8	54.7	34.7	42.1	37.8	49.1	36.6	27.5	49.7	64.9	51.6	26.1	36.7	43.9	36.8	52.3	45.6	52.8	57.5	33.4	46.5	30.3	37.1	50.7	72.7	77.4	51.9	51.2	42.4	43.9	39.5	56.6	46.6	44.8	34.3	57	57.5	44.8	31.4	38.2	58
ATG4A	3.41	7.33	3.07	3.23	3.78	3.71	4.48	5.11	3.58	3.84	4.68	3.7	3.82	3.67	3.74	3.86	3.83	3.45	4.4	3.68	3.02	3.43	4.08	4.42	3.73	4.17	4	4.64	4.09	3.6	4.56	5.26	3.84	4.36	4.31	4.58	4.69	3.78	3.74	3.76	3.4	5	4.07	4.59	3.8	4.95	4.08	4	5.61
ATG4B	18.9	16.2	19.4	21	27.4	17.9	17.3	17.9	16.3	17.7	18.4	18.6	22.4	22.6	18.6	18.7	17.5	23.5	25.6	19.6	26.7	19.4	16.6	17.8	17.9	19.8	21.6	12	14.9	17.5	15.4	15.9	20	20	14	15.6	14	23.4	19	14.7	14.8	14.1	19.3	15.2	16.6	15	15.6	17.2	15.5
ATG4C	2.05	3.21	2.7	2.48	2.13	2.81	3.59	2.93	3.1	3.82	3.3	3.29	2.85	2.71	3.48	3.39	3.34	2.47	1.87	2.73	1.9	3.09	3.82	2.84	2.87	2.83	2.21	5.18	3.81	3.03	3.39	3.61	2.7	1.87	2.9	3.27	3.97	3.15	2.44	3.15	2.72	4.13	2.51	4.07	3.06	3.03	3.42	3.29	3.2
ATG4D	20	21.2	11.8	20	19.2	14.7	13.3	15.1	12.8	13.2	14.8	16.3	19.2	18	15.1	17.5	15.8	17.1	26.8	15.4	22.8	12	14.4	16.4	16.1	17.8	17.2	9.8	12.4	17.1	12.8	17.5	21.3	19.1	13.7	14.8	13.7	17.8	16.6	12.2	13.9	12.1	15.1	15	13.8	16	11.6	17.2	16.2
ATG5	3.84	6.08	2.38	4.58	3.29	4.07	4.85	5.41	4.97	5.24	4.83	4.44	3.07	3.57	3.83	4.34	3.96	3.33	4.67	3.03	2.1	4.13	5.09	5.98	5.15	4.51	4.71	6.03	5.33	4.22	4.08	5.26	4.49	4.13	4.69	5.68	5.93	3.38	3.46	4.43	3.52	6.44	2.99	6.19	5.24	4.6	3.7	4.65	5.95
ATG7	13.7	12.7	12.5	11.2	17	10	7.96	10.9	8.11	11.9	7.56	8.67	11	12.6	8.37	8.29	13.3	19.1	8.87	10.8	18.4	12.6	7.68	10.4	7.75	10.4	15.5	8.82	9.99	8.74	9.83	8.17	17.7	14	9.23	7.74	8.46	13.5	9.72	17.7	15	10.1	12.4	9.22	11.2	11	10.2	9.08	8.74
ATG9A	23.1	23	19.6	23.4	36.2	22.9	13	21.8	19	16.8	14.9	14.9	21.9	24.8	15.1	15.8	16.7	31.7	17.8	18.5	25.6	19.1	12.2	21.9	13.6	23.3	30.3	10.8	12.9	13.9	13.1	15.7	16.6	28.5	15.1	12.7	11.3	21.4	19.1	20.5	20.1	11.2	17.3	13.2	16.8	18.7	15.5	13.6	11.6
ATG9B	0.928	0.785	1.15	1.15	0.784	1.23	1.31	1.38	1.23	0.864	1.85	1.17	1.53	2.94	1.64	2.32	1.17	0.894	0.794	2.33	1.39	1.37	1.71	0.621	1.62	0.89	0.826	1.39	2.08	1.15	1.61	0.975	1.43	0.775	0.825	1.41	1.33	1.7	1.37	0.685	1.02	1.05	0.95	1.06	0.821	0.539	0.615	2.28	0.818
ATHL1	158	173	131	175	230	232	129	136	173	125	131	88.8	115	157	146	135	141	239	162	108	177	99	113	159	177	231	222	51.8	74.9	76.5	51.7	134	195	125	160	148	59.8	156	153	155	189	80.7	76.5	95.8	121	149	93.1	217	76.2
ATIC	10.9	8.31	13.6	6.95	9.4	8.8	12.8	10.2	8.45	11.8	13.1	13.5	17.4	16.1	14.1	13.7	13.5	9.67	8.76	20.4	22.6	12.9	11.1	8.37	9.16	9.13	7.14	17.5	13.2	13.9	19.8	13.3	19.9	10.5	10.4	11.6	12.4	14.9	16.3	9.11	10	14	15.1	13	7.71	11	17.3	11.7	14.6
ATL1	0.346	0.472	0.448	0.252	0.741	0.465	0.353	0.337	0.383	0.26	0.394	0.48	0.272	0.337	0.467	0.433	0.491	0.305	0.344	0.361	0.552	0.283	0.305	0.343	0.411	0.555	0.333	0.595	0.421	0.436	0.72	0.565	0.345	0.3	0.541	0.431	0.471	0.279	0.529	0.437	0.46	0.363	0.396	0.288	0.252	0.545	0.551	0.433	0.651
ATL2	2.88	2.74	3.16	6.92	2.75	5.81	4.52	4.08	5.79	4.89	4.32	3.64	2.88	2.39	4.11	4.36	4.03	2.98	3.34	3.38	3.4	4.54	4.91	4.13	4.66	5.56	7.14	5.6	4.58	3.81	3.26	3.53	2.32	2.89	4.45	4.25	4.43	3.39	3.15	4.05	3.43	4.4	2.93	4.1	4.3	2.8	4.16	3.66	3.29
ATL3	3.79	2.68	2.87	2.7	3.38	4.56	3.15	2.14	2.53	3.37	2.07	3.06	2.7	2.33	2.85	2.08	3.21	4.92	3.05	2.63	3.83	3.63	3.56	3.01	3.32	4.94	4.61	2.99	3.2	3.64	2.9	2.83	4.05	2.59	4.41	2.78	3.51	1.68	2.37	5.01	3.5	4.08	3.27	3.3	4.76	4.29	4.68	2.43	2.8
ATM	7.95	8.45	10.8	12.5	8.31	15.3	14.9	15.3	21.6	12	15.3	11	8.25	6.51	14.4	14.4	8.33	3.34	10.7	11.1	3.99	12.4	20.1	16.3	16.8	9.97	12.5	24.1	14.5	15.6	11.9	8.94	4.71	8.99	14.8	16.7	18.9	7	8.59	13.6	15.3	17.3	11.1	12.6	19.7	12	12.4	13.3	8.03
ATMIN	3.5	2.95	4.21	2.97	3.69	3.44	4.32	3.64	3.83	4.73	4.31	4.36	4.02	3.82	4.28	4.54	4.86	3.55	3.32	4.35	3.2	4.09	4.65	3.71	4.22	3.79	3.27	6.21	5.58	4.98	4.8	3.78	3.46	3.19	3.45	4.06	5.07	3.59	3.41	4.27	3.4	4.84	4.53	4.68	4.58	5.2	4.24	3.8	4.85
ATN1	4.68	2.79	5.07	2.46	4.07	2.83	5.06	3.25	4.09	3.89	5.89	4.32	5.44	7.28	5.1	6.9	4.24	3.68	8.59	7.6	4.1	3.65	4.16	3.53	6.03	3.85	1.96	3.64	5.15	6.46	5.22	2.98	2.86	2.87	2.98	4.63	3.43	7.43	5.85	3.07	3.57	3.77	5.62	4.04	4.9	2.7	3.76	4.89	3.62
ATOH1	0	0	0	0	0	0	0	0	0	0	0	0	0	0	0	0	0	0	0	0	0	0	0.00866	0	0	0.0201	0	0	0	0	0	0	0	0	0	0	0	0	0	0	0	0	0	0	0	0	0	0	0
ATOH7	0.0177	0.0399	0.0229	0.0385	0	0.0261	0.00747	0	0.0167	0	0	0	0	0.012	0.00967	0.0366	0.0222	0	0.0263	0.00625	0.0264	0.0076	0	0.0303	0	0	0.0141	0.0124	0.00709	0.0212	0.0305	0	0.016	0	0.0232	0.00985	0.00601	0.00829	0.0394	0.0556	0.0914	0.011	0.00742	0.0283	0.00913	0.031	0.0072	0.0108	0.017
ATOH8	0.857	0.0151	0.88	0.178	0.883	1.22	0.118	0.377	0.139	0.0703	0.298	0.0476	0.25	0.91	0.192	0.654	0.0894	0.679	0.401	0.981	0.0832	0.874	0.51	0.454	0.27	2.46	0.266	0.218	0.631	0.522	0.217	0.143	0.257	0.0894	0.032	0.0322	0.0514	0.307	0.151	0.319	0.161	0.317	0.269	0.492	0.404	0.143	0.165	0.114	0.109
ATOX1	27.3	33.4	26.3	18.6	28.1	16.8	26.7	22.7	19.1	26.8	21.9	25.1	38.4	36.2	23.2	22.6	30.5	31.6	28.4	23.8	66.8	25.5	18.8	21.8	15.3	20.6	24.2	21.5	20.4	19.6	24.5	34.4	51.3	38.7	16.5	23.7	22.5	32.7	26.2	23.3	21.1	20.1	28.9	26.3	17.8	36.5	24.1	26.4	34.7
ATP10A	4.66	4.42	3.28	4.05	2.63	3.35	4.34	4.43	3.42	2.65	3.54	3.25	3.47	3.48	3.79	4.39	3.15	1.27	5.99	4.43	2.79	3.64	4.28	2.42	4.39	1.97	2.48	5.15	6.94	4.92	7.94	5.77	5.39	3.02	3.71	6.41	7.61	3.33	3.7	4.7	5.54	7.75	6.57	6.53	5.49	7.89	6.53	6.32	6.84
ATP10B	0.0103	0.0156	0.00297	0.00501	0	0.0127	0.00874	0.0218	0.00815	0	0.00294	0.0167	0.00571	0.00234	0	0.00178	0.0108	0	0.00514	0.00365	0	0.00593	0.00488	0.00591	0.00383	0.00283	0.00275	0.00604	0.00276	0.00206	0.00594	0.00515	0.00311	0.00629	0	0.00576	0.00468	0.00323	0.00384	0.00868	0.00446	0.00429	0.00145	0	0.00712	0.00201	0.00842	0.0105	0.00664
ATP10D	2.1	1.31	2.93	1.52	2.14	1.99	3.03	1.96	2.45	2.57	2.11	1.84	2.15	1.41	2.54	1.56	2.69	1.55	2.12	2.27	0.929	2.48	2.95	2.31	2.35	2.18	1.7	2.69	2.61	2.49	2.53	1.8	1.33	2	3.4	2.55	1.98	1.35	1.35	3.2	2.6	2.69	2.07	2.31	3.79	2.37	3.68	1.54	2.07
ATP11A	9.23	12.2	12.8	24.4	18.2	20.2	9.2	12	15.1	12.9	7.89	8.45	7.1	5.32	10.5	7.73	8.49	10.9	9.79	6.27	3.96	14.6	10.4	14.1	11.6	15.9	21.4	6.48	8.49	8.89	9.57	9.28	4.12	14.9	19.6	10.4	9.64	6.85	6.54	21.3	17.9	11.2	9.86	8.83	20.7	13.3	11.9	6.91	5.56
ATP11B	12.5	19.1	9.5	22.3	21.6	31.8	11.8	14.3	16.6	13.2	8.56	10.3	7.09	6.19	9.7	9.17	11	16.6	8.67	6.68	4.8	13.3	11.9	17.8	14.9	24.7	34.4	13.5	10.4	10.3	8.02	10.3	6.39	19.6	23.2	11.3	11.7	8.2	8.9	28.2	22.6	14.1	8.55	10.7	19.9	15.3	14.8	10.8	9.39
ATP11C	1.84	2	1.89	2.53	1.83	3.16	2.78	2.34	3.06	2.7	2.32	1.85	1.52	1.2	2.18	2.18	1.65	1.47	1.9	1.64	0.663	2.19	2.83	2.76	2.84	2.22	2.55	3.59	2.72	2.48	2.34	2.03	1.54	2.11	3.3	3.21	2.63	1.4	1.37	3.55	2.63	3.17	1.75	2.66	2.97	2.05	2.7	2.26	2.09
ATP12A	0	0.00789	0	0	0	0.00515	0	0	0	0	0.00298	0.00339	0	0	0	0	0.00439	0	0	0.00494	0.00522	0	0.00494	0	0.00259	0	0	0	0	0	0.00401	0	0	0	0	0.00389	0	0.00328	0	0	0	0	0	0	0	0	0.00569	0.00425	0.00337
ATP13A1	21.7	16.4	20.1	16.9	16.1	13	17.2	16.6	15.2	14.6	20.2	17.6	21.8	22.6	17.7	20.1	15.4	18.6	26.9	26.3	19.2	15.3	17.3	16.7	18.6	15.6	12.9	14.3	18.5	22.2	23.3	18.7	29.6	14	15.9	21.6	20.4	26.9	20.8	14	18.9	26.2	27.7	22.6	17.6	25.2	21.4	23.3	24.7
ATP13A2	8.68	6.95	8.92	6.96	9.57	5.75	7.65	5.07	6.63	8.78	10.1	8.47	11.5	12.9	8.18	9.96	7.3	9.25	14.1	11.6	7.9	8.07	8.53	6.84	7.34	5.96	4.75	6.09	8.97	11	8.46	7.73	8.81	6.61	5.85	7.71	8.61	9.98	7.73	6.69	6.34	6.96	11.2	7.47	7.55	10.5	9.29	8.43	8.63
ATP13A3	3.22	2.43	4.46	3.73	3.3	5.22	4.86	3.79	4.81	5.31	3.64	3.81	2.36	2.7	4.02	3.36	3.84	5.1	3.2	4.34	2.29	4.01	4.59	4.89	4.41	6.32	4.65	6.17	5.29	4.77	4.41	3.41	2.22	2.39	3.4	3.9	4.77	3.04	2.52	4.77	4.93	5.49	3.27	3.33	5.92	3.31	4.88	3.29	3.34
ATP13A4	0.0975	0.00689	0.139	0.0709	0.0709	0.153	0.232	0.0347	0.24	0.0964	0.161	0.0978	0.146	0.153	0.103	0.161	0.0651	0.108	0.0455	0.123	0.0685	0.0708	0.177	0.11	0.0971	0.12	0.0972	0.218	0.0685	0.208	0.0596	0.041	0.0606	0.1	0.196	0.224	0.0767	0.0429	0.0883	0.157	0.0789	0.114	0.12	0.156	0.148	0.0535	0.112	0.204	0.112
ATP13A5	0.0142	0.00805	0.0277	0	0.0276	0	0.00603	0.00901	0.00337	0	0	0.00693	0.0059	0	0.0078	0.0148	0	0.0296	0	0.00756	0.032	0.00613	0.00252	0	0.00264	0.0293	0.0114	0.0025	0.00858	0.00854	0.0041	0.0213	0.00644	0	0.00934	0	0.00727	0.00335	0.0317	0.0224	0.00461	0.00444	0.018	0	0.00368	0	0.0203	0.00868	0.00344
ATP1A1	32.9	17.5	41.1	20.3	40.8	24.6	30.7	20.5	22.7	34.1	33.6	33.9	37.7	53.5	30.6	32.3	36.8	44.9	27.7	48	52.3	38.4	31.5	23.6	29.5	30.6	22.5	41	46.8	34.9	46.6	22	45.9	18.8	20.3	31.2	30.8	39.7	31.3	29.2	34.6	32.7	45	30.8	32.6	33.8	38.2	31.7	26.1
ATP1A1OS	10.2	6.03	12	5.56	11.9	7.11	8.89	6.68	6.75	10.4	10.3	10.3	12.3	16.5	9.38	9.37	11.6	13.9	8.11	14.2	18	11.2	9.32	7.02	8.8	9.7	7.06	12.8	13.3	10.1	14.1	6.83	16.8	5.45	6.13	9.28	9.1	12.6	10	8.46	10.2	10	14	9.59	9.15	10.2	10.6	9.56	7.74
ATP1A2	0.00477	0	0.0144	0.00347	0.00462	0.00352	0.00807	0.00302	0.0113	0.00838	0.0122	0.00928	0.0079	0	0.0157	0.00741	0.012	0.00991	0.00356	0.00506	0.00357	0.00821	0.00338	0.00205	0.00177	0.00392	0.0076	0.00669	0.00765	0.00286	0.011	0	0.00431	0	0	0.00798	0.00324	0	0.0106	0.003	0	0.00297	0.00401	0.00191	0.0123	0.00279	0	0	0
ATP1A3	1.31	0.548	1.14	0.822	1.29	0.715	0.888	0.759	0.715	0.58	1.13	1.21	1.52	0.757	0.954	0.968	0.905	0.628	2.12	1.33	1.16	0.804	0.619	1.09	0.663	0.41	0.437	0.84	0.896	1.74	1.44	1.1	1.34	1.04	0.479	0.932	1.04	0.761	1.2	0.686	0.65	0.746	1.47	0.879	1.14	1.71	0.756	0.599	1.5
ATP1A4	0	0.00745	0.17	0.00479	0.128	0	0.00557	0.0708	0.14	0.00386	0.00563	0.00961	0.0764	0.00447	0.00361	0.15	0.157	0.171	0.182	0.00699	0.138	0.00851	0	0.00565	0.00244	0	0.137	0.00231	0.127	0	0.182	0.118	0.107	0.00602	0.00432	0.00367	0.00448	0.00309	0.132	0.0083	0.183	0.00205	0.133	0	0.0034	0.0154	0.113	0	0.00318
ATP1B1	1.07	0.415	0.771	0.336	0.551	0.516	0.686	0.517	0.628	1.02	1.24	0.795	1.41	0.739	0.519	0.423	0.886	0.566	1.29	0.771	1.23	0.622	0.642	1.12	0.421	0.409	0.444	1.34	0.931	0.816	1.16	0.531	0.952	0.357	0.528	0.911	0.801	0.656	0.798	0.761	0.613	0.904	0.756	1.13	0.82	0.595	0.942	0.815	0.737
ATP1B2	0.203	0.858	0.0877	0.0171	0.159	0.185	0.0232	0.0396	0.0629	0.0962	0.0634	0.0304	0.0972	0.133	0.0814	0.0851	0.0295	0.163	0.0408	0.0332	0.146	0.0303	0.0803	0.0201	0.104	0.0708	0.0249	0.0357	0.091	0.0609	0.0809	0.129	0.275	0.0286	0.082	0.109	0.133	0.128	0.0435	0.0788	0.101	0.0341	0.092	0.0313	0.145	0.105	0.0701	0.0905	0.124
ATP1B3	9.38	9.11	12.1	9.36	12	7.43	13.2	9.17	7.8	12.8	11.2	10.9	13.4	13.7	8.25	8.07	12.5	10.9	13.9	10.3	12.5	12.2	10.5	10.2	6.61	8.93	8.23	10.6	11	11.4	15.8	12.3	16.3	10.1	7.84	11.7	10.6	11.1	9.66	13.1	9.41	12.6	15	14.7	11.5	14.8	15.4	8.98	14.3
ATP1B4	0.00546	0	0.00235	0	0	0	0.00462	0	0.00258	0	0.00466	0.00266	0	0.0074	0	0	0	0.00568	0	0	0	0	0	0	0	0.00449	0.00435	0	0.00438	0	0	0	0	0	0	0	0	0.00256	0	0.00688	0.00353	0.0034	0.00229	0	0	0.00638	0.00223	0	0.00527
ATP2A1	1.13	1.13	0.766	1.01	0.843	0.979	0.586	0.839	0.739	0.634	0.595	0.588	0.898	0.675	0.67	0.588	0.565	1.33	0.918	0.542	1.49	0.809	0.564	0.617	0.759	0.521	1.4	0.44	0.444	0.583	0.339	0.694	0.905	1.12	1.15	0.97	0.396	0.574	1.01	0.771	0.915	0.804	0.483	0.76	0.723	0.767	0.514	0.808	0.693
ATP2A2	4.7	4.05	7.08	4.62	5.28	5.11	6.43	4.99	5.46	6.79	6.22	5.09	4.81	4.39	5.08	4.87	5.28	5.02	6.67	6.36	4.59	5.66	5.28	5.26	5.88	4.83	4.01	6.31	6.83	7.53	7.21	4.85	3.81	3.88	4.48	5.25	5.93	5.22	5.02	5.65	5.2	8.1	6.42	5.19	6.38	5.81	7.6	4.85	5.38
ATP2A3	87.4	89	94.6	113	142	82.8	57.3	81.4	77.6	67.8	72.5	75	82.6	93.6	75.2	94.4	70.2	129	87.6	82.8	92.2	96.1	66	86.1	92.3	88.1	99.5	54.3	60.6	75.4	70.9	71.5	80.5	111	80.5	64.8	49.8	88.8	81.1	86	87.3	56.4	80.8	56.1	74.7	68.1	70.7	65.6	65.2
ATP2B1	14	10.9	11.9	10.1	12	14.1	11.1	9.5	11.7	14.5	9.03	11.9	7.46	7.65	11.1	9.42	15.9	12.3	6.52	9.45	7.92	11.5	13.7	12	12.8	16.1	17.5	12	12.8	10.4	11	8.73	9.17	6.36	12.6	11.9	8.8	8.32	10.3	18.5	21	14.4	12.1	10	17.4	11.3	11.7	7.71	7.33
ATP2B2	0.0145	0.0164	0.00501	0.0254	0.0226	0.00429	0.00492	0.0147	0.0055	0.0136	0.00497	0.0127	0.00482	0.00789	0.00955	0.00452	0.00914	0.0151	0.0238	0.0113	0.0109	0.015	0.00823	0.0175	0.00754	0.0167	0.0232	0.00714	0.007	0.0157	0.0134	0.0196	0.00788	0.0159	0.00762	0.00973	0.0089	0.0109	0.0081	0.0183	0.00564	0.0145	0.011	0.00814	0.00751	0.0068	0.0083	0.0106	0.00841
ATP2B3	0.00792	0.00896	0.00171	0	0	0	0	0	0.00375	0.00464	0	0.00193	0.00328	0.0108	0.00434	0	0.00249	0	0.00296	0.00981	0.00593	0.00682	0.00281	0	0.00881	0	0.00632	0.00835	0.00477	0.0142	0.00684	0.0119	0.00358	0	0.0026	0	0.00269	0	0.00883	0	0	0	0	0.00159	0.00614	0.00927	0.00323	0.0121	0.00382
ATP2B4	18.7	9.31	12.3	13	15.6	21.5	14	7.61	10.6	12.9	11	11.5	11.7	8.94	10.5	9.75	13.9	21	13.6	12	12.5	9.9	13.1	13.8	13	23.3	14	11.9	10.3	18.9	12.2	11.1	7.54	7.89	17.4	8.86	10.8	7.11	12.5	17.3	13.6	11.4	11.8	10	20.9	14.7	16.2	8.87	13.2
ATP2C1	5.15	5.72	5.42	5.61	5.67	6.1	5.83	4.91	6.26	6.26	5.25	5.17	4.4	4.16	5.12	5.39	5.9	5.83	4.77	5.15	3.79	5.62	6.05	5.54	5.43	5.75	6.42	6.57	6.4	5.49	6.07	5.15	4.37	5.26	6.35	5.45	6.3	4.68	4.84	6.89	6.09	6.99	5.33	5.93	5.95	5.23	6.84	4.77	5.76
ATP2C2	0.0846	2.35	0.0929	0.33	0.739	0.761	0.16	1.23	0.554	0.888	0.279	0.225	0.108	0.214	0.207	0.351	0.189	4.13	0.241	0.242	0.323	0.894	0.15	1.02	0.194	0.329	0.399	0.222	0.303	0.383	0.0841	0.483	0.292	1.86	0.525	0.129	0.484	0.13	0.343	0.359	0.558	0.247	0.162	0.225	0.255	0.126	0.182	0.722	0.297
ATP4A	0.00732	0.0166	0.0126	0.0266	0.0355	0.0108	0.0217	0	0.0208	0.00858	0.0156	0.00712	0.0425	0.0298	0.0281	0.0417	0.0276	0.0381	0.0218	0.0259	0.0384	0.0158	0.0181	0.0251	0.00814	0.0301	0.0233	0.0103	0.0206	0.0307	0.00842	0.0109	0.0331	0.0335	0.024	0.0286	0.0324	0.0309	0.0204	0.0138	0.0142	0.0274	0.0215	0.00878	0.0189	0	0.0209	0.0134	0.0318
ATP4B	0	0	0.00749	0	0	0.0256	0	0	0.00822	0	0	0	0	0	0.00951	0	0	0	0.0518	0.00614	0	0.00748	0	0	0	0.0143	0	0	0	0.0312	0.02	0	0	0.0159	0	0	0.0118	0	0	0	0	0.00541	0.0073	0	0	0.0102	0.0142	0	0.00838
ATP5A1	48	57.3	63.6	43.1	64.8	48	54.9	51.3	39.3	64.4	58.6	60.1	72.3	86.2	57.4	59.1	73.4	70.4	56.6	72.1	103	65.1	51.1	47.9	45.7	50	47.4	65.4	63.2	52.6	73.4	66.9	94.2	56.3	43.6	54	52.3	69.7	63.1	51	47.9	60.5	64.7	63	43.1	57.5	72.8	56	68.1
ATP5B	159	208	192	133	218	138	143	135	91.8	168	142	160	219	262	151	145	205	231	163	194	293	161	131	132	124	164	147	156	167	142	204	187	275	186	124	148	152	194	172	155	153	160	201	161	133	198	191	162	186
ATP5C1	28.7	52.5	14.5	23.8	21.4	25.4	29.6	26.9	26.5	35.4	32.2	32.1	20.3	43.8	24.4	22.3	27.1	29.7	32.8	21.4	27.3	26.9	27	32.4	31.3	31.3	21.6	35.4	34.8	21.9	36	50.6	65.5	34.1	26.3	40.8	41.8	24.2	14.6	21.6	18.3	45.1	20	49.6	25.4	35.4	28.1	25.6	50.6
ATP5D	38.8	34	31.2	31.1	25.7	21.1	23.9	24.3	19.2	31.1	28.6	33.9	45.2	64.6	31.4	37.8	22	24.5	47.7	39.8	45.3	23.7	27.3	19.9	22.6	20.4	14.8	16.4	23.7	27.8	25.1	40.3	59.4	29.4	16.8	26.9	29.3	35.1	34	15	19.2	22.8	33.8	26.2	16.3	39.7	24.3	38	33.8
ATP5E	419	755	83.9	180	208	185	155	212	190	232	262	195	305	336	165	109	216	277	198	107	238	167	115	169	160	284	208	134	148	102	150	290	419	298	180	153	159	157	172	123	96	121	95.6	183	191	187	129	126	243
ATP5EP2	3.26	3.36	0.611	0.875	1.72	0.94	1.17	0.985	1.44	1.53	1.06	0.93	1.76	1.3	0.776	0.55	1.42	2.06	1.16	0.626	1.11	0.792	0.677	0.608	0.682	1.16	1.52	0.845	0.767	0.721	0.692	1.64	1.98	1.16	1.02	1.42	0.65	1.23	0.907	0.625	0.229	0.64	0.744	1.22	0.841	1.45	0.548	0.604	1.84
ATP5F1	14.6	22.5	13.7	17.4	17.8	14.7	15.4	22.3	14.5	16.9	18.2	19.1	18	23.7	15.7	16.3	20.1	19.1	20.3	16.6	19.9	17.1	16.8	18.7	17.8	19.3	17.1	18.1	18.4	12.3	16.8	23.7	24.1	18.5	12.7	16.8	17.2	17.2	15.8	13.8	11	16.2	16.2	19.8	15.6	17.6	14.2	17.8	18.1
ATP5G1	18.8	21.4	21.4	10.9	12.9	12.1	19.8	19.4	11.8	18.2	23	20.4	28.5	28.2	21	26	22	19.6	23	24.7	43.8	16.3	16.7	13.7	14.8	13.7	10.6	25.1	17	18.1	24.5	31.9	41.1	17	13.8	18.8	20.9	28.6	24.8	12	12.7	23.6	22.9	23.2	12.3	25.8	20.8	24.6	26.8
ATP5G2	58.8	59.9	70.3	43.6	55.7	48.3	57.7	62.3	46.1	62.8	68.7	71.6	89.8	98.4	68.9	80	74	81.8	67.6	77.2	158	57	57.4	49	45.7	47.9	46.4	74.8	59.1	58.2	65.1	76.6	127	62.8	42.8	59.3	63.1	87.5	78.6	40.9	45	56.4	68.4	74.9	40.6	72.9	55.1	72.9	70.8
ATP5G3	12.3	22.3	15.8	9.4	13.9	10.3	16.2	14.4	9.92	14.9	16.4	14.9	19.5	19.8	14	16.2	16.2	14.2	16	15.9	26.3	12.7	13	12.1	11.9	11.9	9.85	17.2	15.4	14.1	19.1	27.5	27.7	16.5	10.9	17.1	17.1	19.1	16	11.4	11.6	17.7	16.8	18.5	11.2	18.4	16.8	18	23
ATP5H	34.7	45.9	33.2	18.2	24.9	25.5	33.5	48.1	26.9	33.4	44.6	42.3	48.4	65.4	37.7	39.7	46.7	46.8	29.2	31.8	81.2	27.3	28.1	27.7	22.4	34.8	25.7	36.9	29.3	22.7	34.7	53.7	75.8	34.7	25.6	35	36.5	47.1	50.3	20.6	18.5	35.4	34.4	41	22.8	36.9	27.4	56.2	45.8
ATP5I	53.9	86.9	29.8	45.1	51.8	37.2	47.3	56.1	55.8	59.2	67.3	55.9	56.7	89.3	43.1	47	56.8	75.1	74.5	45.1	72.7	48.9	39.6	44.1	46.5	59.5	38.1	37.1	53.7	26.9	50.9	78	113	70.7	38.3	38.3	60.6	55	34.6	38.9	29.7	43.5	38.2	66.7	30.5	56.5	47.2	38.3	77.1
ATP5J	10.1	17.2	4.63	8.8	8.07	7.05	9.12	7.76	9.79	11.9	10.4	8.75	7.4	14.2	7.23	7.42	9.67	12.7	11	6.4	10.8	8.37	8.14	8.71	8.99	10.6	6.7	9.61	10.2	6.31	10.1	16	20.9	10.8	8.47	8.89	14	7	5.11	7.32	5.24	10.5	5.9	13.1	6.83	9.72	7.79	7.51	17.1
ATP5J2	43.9	77.3	31.7	30.8	43.1	32.8	38.4	42.2	38.5	43	46	41.7	56.4	63.4	39.8	41.6	45.1	59.1	59.3	36.4	92.9	39.4	32.4	39.4	30.4	41.5	35.3	42.8	36.1	27.8	41.8	73.2	102	54.9	31.4	43.9	50.4	55	46.3	24.9	22.3	41.5	33.5	60.8	25	47.7	34.1	44.1	57.2
ATP5J2-PTCD1	8.47	9.81	6.16	7.4	8.14	6.26	6.33	7.64	6.44	7.28	7.4	6.99	8.78	9.16	6.45	7.2	7.6	9.61	9.05	6.88	13.7	6.79	6.06	7.05	5.96	8.22	7.58	5.98	6.66	5.9	6.72	9.49	15.1	9.36	6.09	6.59	7.49	8.5	8.27	5.91	5.69	6.93	7.13	8.53	5.62	7.53	6.26	7.39	8.86
ATP5L	20.4	34	15.5	18.3	15.2	18.8	19.1	28.7	21.9	25.7	25.2	22.9	26.3	27.7	20.8	22.6	22.4	22.9	26.4	16.2	36.6	16.8	18.4	21.1	20.5	22	18.3	25.7	18.6	14	17.4	33.1	41.1	24	17.4	22.7	24.6	23.5	23.1	11.3	11.1	22.8	15.8	28.4	17.2	20.3	14.3	26.7	27.9
ATP5L2	0	0	0.0141	0	0	0	0.0414	0	0.0309	0	0	0	0	0.0442	0.0357	0	0	0	0.0243	0	0.0244	0	0.0115	0.028	0.0121	0	0.026	0.0572	0	0.0586	0.0563	0.0244	0	0	0.0214	0.0182	0.0333	0	0	0.0205	0	0	0	0.013	0.0168	0	0	0	0
ATP5O	50.8	84.2	35.8	35.4	39.2	44.2	47.8	61.6	49.4	64	73.5	58.1	62.5	94.5	53.1	58.7	65.1	65.6	53.2	48.9	55.6	38.8	49.1	43.7	52.3	52.1	34.8	60.1	56.3	34	55	85.3	110	58.9	40.4	63.1	60.9	60.5	51.1	31.3	26.1	62.8	38.2	68.7	40.3	56.7	43.9	63.8	78.3
ATP5S	1.05	1.65	0.786	1.3	0.838	1.23	1.3	1.38	1.56	1.5	1.28	1.58	0.951	0.995	1.71	1.28	1	0.923	1.78	0.996	0.931	1.13	1.67	1.51	1.57	1.02	1.04	2.05	1.23	1.42	1.26	1.75	1.42	1.08	1.71	2.01	1.81	0.867	1.04	0.917	0.812	1.39	1.02	1.81	1.22	1.64	1.27	1.41	1.39
ATP5SL	11.7	14.8	13.3	10.4	13.5	9.57	10.1	11.3	9.24	11	13	13	16.1	16.5	11.1	12.8	12.7	12.9	13.6	12.7	17.1	11.7	9.87	10.5	8.96	9.7	9.78	10.4	10.2	10.4	12.8	15.4	15	14.1	8.89	12.3	10.6	16.1	11.8	9.85	10.5	11.7	15.9	11.8	8.29	13.6	11.5	13.3	13.5
ATP6	409	78.8	553	102	395	112	162	206	117	201	133	235	597	460	317	229	371	420	151	359	553	185	129	119	115	270	194	291	231	236	222	219	285	226	119	190	78.6	356	263	178	189	74.7	269	136	103	213	116	216	130
ATP6AP1	68	58.4	71.8	74.3	112	63.4	33.9	41.3	51.2	57.1	33	46.4	60.6	69	43.5	43.3	59.3	123	41.8	50.3	119	74.8	32.2	53.5	38.6	65.5	85.2	31.9	41.8	39.9	44.9	45	92.4	78.5	51.2	30.6	32.8	68	54.6	91.4	84.3	41.9	58.7	40.4	45.9	70.5	57.9	34.7	42.7
ATP6AP1L	0.515	0.311	0.356	0.875	0.533	0.583	0.567	0.5	0.39	0.242	0.367	0.418	0.313	0.629	0.358	0.249	0.238	0.75	1.03	1.45	0.489	0.621	0.414	0.634	0.701	0.707	0.411	0.543	0.483	0.432	0.731	0.308	0.652	0.785	1.13	1.02	0.397	1.05	0.459	0.195	0.245	1.1	1.29	0.289	0.195	0.402	0.462	1.09	0.597
ATP6AP2	40.1	42.4	57.5	47.1	79	53	41.8	52.7	42.2	69.7	37.2	54.9	44.2	49.4	42.3	39.5	68.3	68.2	35.8	44.3	54.8	76.2	41.1	57.7	38.9	58.1	85.5	42.7	56.9	40.8	47.2	39.6	49.8	53.4	42.9	41.5	45.1	54.7	44.9	70.6	48.5	42.6	47.1	39.5	47.2	44.9	44.2	41.1	33
ATP6V0A1	15	27.1	23.8	15.5	25.9	15.8	10.8	14.7	15.9	17.1	8.95	11.8	15.5	17	14.8	11.5	13.6	27.7	10.3	12.3	24.2	20.8	9.38	16	12.6	12	22.6	9.97	11.8	8.7	13.6	12.9	24.8	22	18.7	10.5	7.07	20.2	14.1	17.4	26.2	18.1	16.1	13.4	16.4	14.8	13.1	13.5	11.3
ATP6V0A2	3.11	2.92	3.18	3.12	2.65	3.26	3.33	3.27	3.93	3.37	3.31	3.36	2.61	2.4	3.23	3.97	3.46	2.48	3.72	3.73	2.21	3.38	3.76	3.85	4.48	2.65	3.36	3.82	3.46	4.24	3.73	3.28	2.68	2.99	3.77	3.81	3.57	3.66	3.59	3.13	2.86	3.36	3.52	3.39	3.66	3.29	3.35	3.07	3.37
ATP6V0A4	0	0	0	0	0.0301	0.00573	0	0	0.00367	0	0.00331	0	0.00643	0.0105	0	0	0	0	0.0116	0.00275	0	0.00668	0.0055	0	0	0	0	0.00272	0.00934	0	0.00893	0	0.014	0	0	0	0.00264	0	0	0.00978	0	0	0	0	0	0	0.00316	0	0
ATP6V0B	268	312	294	405	459	344	154	324	252	221	154	234	243	318	254	220	288	496	181	165	600	265	186	252	193	464	502	100	144	132	127	227	424	422	235	158	110	283	281	278	289	143	213	162	196	208	168	219	152
ATP6V0C	264	189	119	206	224	135	60.3	67.1	81.9	112	79.3	97.2	162	191	96.5	92.2	123	181	154	92.1	184	117	64.5	80.9	69.9	128	129	37.2	77.8	90.8	79.5	136	204	198	83.5	77	74.4	114	115	131	148	47.8	112	60.2	80.7	142	115	107	102
ATP6V0CP3	0	0	0.0182	0	0	0.0311	0.0178	0.0532	0	0.0247	0.0359	0	0.0349	0	0	0	0	0	0.0314	0.0149	0.0945	0.0181	0	0	0	0	0.0336	0.0443	0.0169	0.0504	0.0242	0.063	0.114	0.0769	0	0.0704	0.0143	0.0395	0	0	0.0545	0	0.0354	0	0	0.0492	0.0172	0	0.0406
ATP6V0D1	155	159	200	176	325	151	74	114	85.5	127	78.3	138	180	221	135	106	198	363	102	136	352	185	83.6	117	74.8	196	227	66.1	95.6	72.4	99.1	106	240	225	122	76.3	69.7	193	180	210	191	87.1	121	93.8	86.6	131	82.7	101	84
ATP6V0D2	0	0	0	0	0	0	0.00465	0.00695	0.0052	0.00644	0.00469	0	0	0.0224	0	0	0	0	0.0082	0	0	0	0.00778	0	0.00407	0.00904	0	0	0	0	0	0	0	0	0	0	0	0	0.0122	0	0	0	0.00462	0	0.00568	0	0.00448	0.0067	0
ATP6V0E1	288	332	196	275	350	301	189	280	238	193	174	207	237	302	218	202	247	396	171	169	448	228	176	224	176	410	406	165	169	133	183	289	385	454	235	214	154	297	226	311	253	162	195	220	187	262	179	228	216
ATP6V0E2	8.96	6.63	8.69	8.44	7.39	6.36	9.76	9.14	7.15	6.33	12.5	10.3	13.8	16.9	12.1	16.4	8.67	4.76	11.9	13.3	12.6	7.77	11.7	7.42	13.8	6.52	5.03	11.2	11.1	8.73	13.8	13.6	12.7	8.42	6.7	15.5	9.8	10.8	8.7	5.15	6.81	6.28	10.3	9.94	6.51	9.61	9.14	14.9	8.58
ATP6V1A	20.2	17.2	27.4	31.4	35	30.4	12.7	23.7	24.6	21.1	11.8	16.6	16.3	15.5	19.6	13.2	27.3	22.5	8.69	14.9	18.9	33.1	13.4	23.1	15.7	41.9	55	13.3	20.7	13.5	15.8	12.7	13.2	20	23.9	12.1	10.2	18.3	18.1	54.3	41	15	15.1	13.3	24.3	16.7	20.7	13.8	10.8
ATP6V1B1	0.0134	0.076	0.0232	0.0195	0	0.0198	0.0227	0.017	0.0127	0.0236	0.0172	0.0131	0	0	0.0147	0.0209	0.0169	0.0419	0.02	0.00951	0.0402	0.0116	0	0.0115	0.0249	0	0.0107	0.0189	0.0108	0.00805	0.00773	0.0402	0.0364	0.0368	0.00881	0.00749	0.00914	0.00631	0.0225	0.0339	0	0.0377	0.0169	0.0161	0.0139	0.00786	0.0274	0.00819	0.013
ATP6V1B2	167	158	250	243	437	204	110	192	145	154	93.4	149	152	186	145	109	230	325	88.2	138	289	287	95	178	134	265	365	80.5	146	98.7	123	116	194	306	163	112	68.6	198	184	380	290	102	146	96	160	152	147	123	96.7
ATP6V1C1	9.65	12	7.89	10.7	12.9	16.6	8.43	10.1	6.94	9.46	6	8.6	7.13	7.37	7.24	6.09	10.5	18.5	6.18	6.58	6.58	9.3	6.14	11	7.36	28.4	18.7	7.73	8.14	6.45	7.47	7.48	7.74	10.7	15.6	7.17	6.83	9.36	5.66	17.3	13.3	8.86	7.71	7.5	10	9.39	9.95	8.18	7.7
ATP6V1C2	9.68	11.4	10	6.81	9.86	7.61	11.7	7.39	7.07	11.1	9.42	9.2	9.91	11.5	7.69	7.55	9.19	10.1	8.65	10.8	12.4	8.95	7.87	9.15	8.64	10.6	7.05	11.5	11.7	10.4	15.4	13.7	17.2	8.97	6.94	8.84	10.2	11.1	9.04	10.4	10	16.6	11.5	11.4	9.29	13.6	15.4	6.92	17.2
ATP6V1D	18.8	34.3	16.5	16.5	23.8	17.8	17	18.5	13.6	15.7	14	16.1	17.4	20.4	15.6	13.1	23.4	26.1	11.9	14	19.8	18.3	15.9	15.7	17.2	27.7	24.5	11.9	16.5	9.49	21.4	18.7	19.5	24.2	15.2	14.1	14.4	19.3	17.4	22.2	16.8	13.7	17.7	14.8	14.8	18.1	14.2	16.1	17.2
ATP6V1E1	54.9	56.3	48.8	53.1	81.8	46.1	36	48.9	36.6	42.8	35.8	42.2	48.7	61	43.6	38.6	67.9	86.7	34.9	43.7	78.2	60.4	32.8	40.8	36	73.3	76.3	34	42.6	29.7	47.2	47.1	77.1	81.7	42.7	38.4	32.7	55	48.2	69.3	52.1	33.7	44.8	42.9	35.3	43.5	41	43	43.2
ATP6V1E2	0.921	0.804	0.994	1.23	1.05	1.04	1.28	0.899	1.16	1.1	1.05	1.2	1.24	1.14	1.51	1.24	1.87	1.56	0.903	1.3	1.68	1.17	1.38	1.13	1.19	1.21	1.24	1.31	1.6	0.954	1.6	0.827	1.18	0.782	0.949	0.859	1.21	1.47	1.22	0.813	0.647	1.46	1.29	1.09	0.911	1.05	1.27	1.52	1.17
ATP6V1F	50.9	54.1	47.6	30.8	50.4	32.1	37.2	42.5	34.9	46.7	45.7	49.2	69.5	71.3	50.2	46.1	54.3	63.4	53.8	46.8	116	44.8	34.2	36.1	28.9	40.7	37.8	44	38.5	38.6	44.1	63.5	101	57.2	30.5	45.7	44.8	80.1	61.2	33.6	36.2	42	48.3	57.1	30.7	60.4	40.7	53.8	54.7
ATP6V1G1	36.4	54	18.3	37.2	29.5	35.1	32.5	38.6	42.2	37.2	35.5	38.5	29	34.6	34.2	32	34.4	29.5	34.3	20.7	33.2	31.3	34.8	37.3	35.6	40.1	45.8	41.4	40.6	23.9	29.7	52.5	54.6	59.4	44.5	47.6	42.8	32.8	25.7	32.5	32.7	38.5	20.5	52.4	36.4	34.1	23.1	35.4	41.9
ATP6V1G2	1.17	1.38	1.41	1.29	1.09	1.75	1.46	1.73	1.99	1.08	1.62	1.2	1.06	1.41	1.3	1.77	1.04	1.23	0.86	1.27	0.986	1.16	1.33	1.17	1.59	1.1	1.36	1.45	1.06	1.47	1.07	1.3	1.67	1.07	1.04	1.46	1.09	1.43	1.55	1.1	1.27	1.19	1.02	1.09	0.831	0.95	0.855	1.46	1.22
ATP6V1G2-DDX39B	84.7	89.2	98.6	105	108	113	106	105	99	103	102	88.4	106	106	101	100	103	114	132	105	127	104	98.9	98	107	105	131	106	94.9	91.9	92.6	88.8	105	91.4	87.9	100	89.7	127	107	92.3	80.4	97.2	99.4	94.2	85.8	92	84.9	96	98.9
ATP6V1G3	0	0.0869	0	0	0	0.0284	0.0163	0.0486	0	0.0225	0.0164	0.0561	0	0	0.021	0.0199	0.0242	0	0	0	0	0	0	0	0	0	0	0.0135	0	0	0.0221	0	0.0347	0	0	0	0.0523	0	0	0	0	0.012	0.0323	0	0	0	0.047	0.0234	0
ATP6V1H	7.87	9.15	8.65	7.64	12.9	6.17	7.38	5.15	4.97	8.14	6.65	7.7	7.65	9.66	7.5	7.28	9.83	11.8	6.4	8.6	12.5	10.2	6	7.09	5.66	7.45	9.76	7.71	7.89	7.14	9.89	6.84	12.1	11.2	7.33	5.71	6.97	9.09	8.16	10.8	10.5	7.32	8.91	7.05	7.37	8	8.7	6.69	8.07
ATP7A	2.3	3.07	2.8	2.85	2.88	4.25	2.47	2.37	2.91	2.71	2	2.05	1.6	1.33	2.53	1.85	2.48	2.22	1.63	1.78	1.02	3.32	2.38	3.16	3.58	2.75	4.91	2.33	2.39	2.31	1.85	1.93	1.37	2	3.97	2.37	1.81	1.81	2.21	5.25	5.03	2.58	1.75	2.07	3.99	2.56	2.27	2.35	1.66
ATP7B	0.549	0.639	0.482	0.499	0.262	0.504	0.264	0.476	0.332	0.303	0.206	0.315	0.338	0.237	0.17	0.374	0.459	0.379	0.336	0.221	0.197	0.395	0.233	0.291	0.331	0.923	0.61	0.264	0.233	0.235	0.219	0.17	0.301	0.857	0.74	0.341	0.209	0.484	0.218	0.905	0.538	0.382	0.279	0.204	0.951	0.466	0.315	0.21	0.223
ATP8	665	199	893	184	800	175	277	316	214	293	228	387	876	622	584	371	597	653	296	654	566	433	245	282	200	395	347	495	402	428	538	405	317	362	234	344	177	590	495	347	376	150	439	198	229	399	280	366	221
ATP8A1	4.14	6.39	5.16	7.1	2.59	8.05	6.33	6.92	11.6	6.52	6.22	4.55	2.79	1.64	5.63	4.72	3.24	2.35	5.76	2.99	1.54	4.81	6.47	7.59	6.51	4.03	7.31	8.64	5.22	5.77	4.53	6	2.5	4.93	11.1	6.49	8.13	2.25	2.93	9.35	6.49	7.61	4.07	5.97	7.84	6.12	7.13	4.56	4.75
ATP8A2	0.0156	0.0118	0.0808	0.0416	0.0454	0.0307	0.0506	0.0527	0.108	0.0579	0.0956	0.0684	0.0129	0.0282	0.0542	0.105	0.036	0.0162	0.0388	0.0368	0.00779	0.0426	0.0811	0.0447	0.0849	0.0557	0.0539	0.1	0.155	0.0405	0.0988	0.0778	0.0376	0.0571	0.0171	0.102	0.0779	0.0195	0.0261	0.0656	0.0573	0.0665	0.0503	0.0708	0.043	0.0578	0.0509	0.136	0.0402
ATP8B1	0.149	0.193	0.231	0.0989	0.102	0.155	0.26	0.214	0.264	0.175	0.212	0.218	0.222	0.128	0.269	0.25	0.19	0.0912	0.151	0.228	0.197	0.14	0.287	0.175	0.198	0.101	0.122	0.285	0.137	0.213	0.212	0.131	0.131	0.18	0.265	0.316	0.237	0.198	0.139	0.196	0.148	0.304	0.242	0.276	0.238	0.218	0.188	0.192	0.25
ATP8B2	12.5	10.4	15	16.7	10.9	14.8	18.9	18.5	16.2	12.1	22	17.7	12.9	15.9	17.4	22.2	14.9	7.02	20.6	26.1	8.7	12.7	22.8	14.7	22.6	11.3	9.09	20.9	17.9	20	22.5	15	8.33	8.94	12.6	20.8	16.6	18.9	17.1	12.2	14	16.1	18	14.6	15.8	10.8	17.5	22.8	15
ATP8B3	0.702	0.494	0.566	0.464	0.411	0.621	0.962	0.474	0.564	0.471	0.469	0.478	0.451	0.287	0.533	0.579	0.494	0.479	0.954	0.658	0.324	0.404	0.423	0.527	0.65	0.521	0.493	0.542	0.364	0.599	0.3	0.487	0.345	0.578	0.628	0.506	0.482	0.668	0.498	0.542	0.656	0.587	0.649	0.994	0.642	0.68	0.552	0.519	0.559
ATP8B4	2.21	5.13	1.73	2.57	1.59	2.31	1.96	2.66	3.22	5.99	1.72	1.42	1.48	1.43	1.48	1.35	2.31	4.27	1.43	1.49	0.821	2.22	1.78	2.53	1.52	2.36	3.25	2.59	2.49	2.13	1.86	2.14	2.19	1.61	2.34	2.27	3.97	1.52	1.58	5.64	3.39	2.76	1.85	3.17	2.9	2.14	1.92	2.75	2.02
ATP8B5P	0.0177	0.00666	0.0203	0.0171	0	0.00869	0.00747	0.0112	0.0223	0.0207	0.0151	0.0143	0.00976	0.012	0.0161	0	0.0074	0	0.0351	0.00417	0.00441	0.00253	0.0104	0.00758	0.00873	0.0145	0.00469	0.0145	0.00473	0.0106	0.0102	0.0132	0.0266	0.00538	0.0193	0.0164	0.01	0.00829	0.0164	0.00371	0.019	0.0128	0.0124	0.00707	0	0.00344	0.0024	0	0.00568
ATP9A	0.735	0.598	0.526	0.89	1.4	1.13	0.513	0.528	0.407	0.28	0.631	0.577	0.607	0.24	0.369	0.513	0.534	2.96	0.8	0.483	0.713	1.07	0.577	0.783	0.448	1.13	0.726	1.01	0.353	0.535	0.455	0.594	0.255	0.663	0.369	0.378	0.716	0.271	0.53	0.728	0.581	0.355	0.459	0.632	0.73	0.265	0.61	0.32	0.194
ATP9B	2.65	2.03	3.24	3.57	2.62	3	2.35	2.44	2.73	3.24	3.31	3.52	3.25	4.05	2.98	3.32	2.76	3.88	3.86	3.59	2.42	2.98	3.41	2.69	3.21	2.92	2.65	3.15	3.55	3.26	2.71	1.98	2.46	2.45	2.12	3.44	3.03	2.91	2.87	2.26	2.64	2.57	2.97	2.8	3.08	2.79	3.22	3.09	3.4
ATPAF1	4.41	3.52	3.48	3.56	3.51	3.51	4.4	4.43	3.72	4.06	4.41	4.23	4.48	3.98	4.12	4.73	4.3	3.66	4.05	4.58	4.11	3.7	4.33	3.9	4.13	4.87	3.72	5.14	4.61	4.42	4.71	4.65	4.52	3.27	3.54	4	4.52	4.24	4	3.44	3.55	4.42	4.04	4.58	3.42	3.87	4.48	4.28	5.21
ATPAF1-AS1	0.0611	0	0	0	0	0	0.0258	0	0	0.0179	0	0.0743	0	0.0207	0	0	0	0	0	0	0.0457	0	0.0433	0.0262	0.0226	0	0	0.0107	0.0123	0.0183	0.0176	0	0	0.0558	0	0	0.0312	0	0	0	0	0.00952	0.0257	0	0.0158	0	0.0249	0.0372	0
ATPAF2	6.46	5.47	6.91	4.21	4.77	3.99	5.25	5	4.43	6.53	6.41	6.98	7.86	7.76	6	6.11	5.88	7.98	6.73	7.96	11.7	6.03	5.81	4.29	4.94	4.41	3.68	4.96	5.84	5.35	5.54	6.21	8.31	4.8	3.63	5.35	5.74	7.82	5.62	4.2	4.23	4.31	7.41	4.67	4.51	6.52	5.93	5.88	6.06
ATPBD4	0.488	0.72	0.521	0.528	0.567	0.607	0.639	0.553	0.551	0.682	0.777	0.819	0.74	0.863	0.884	0.766	0.756	0.401	0.652	0.709	0.64	0.739	0.972	0.737	0.879	0.518	0.425	0.995	0.918	0.801	0.991	0.985	0.865	0.505	0.662	0.943	0.927	0.619	0.788	0.591	0.578	0.812	0.773	0.859	0.694	0.71	0.768	1.07	0.738
ATPIF1	16	21.8	11.3	20.6	20.3	17.5	17.6	18.2	19.5	13.8	21	15.3	19.1	19.9	16.5	19.8	15.5	18.6	22	15.5	21	16.5	16.7	19.5	15.2	16.6	19.9	15	17.4	15.9	14.2	21.5	23.4	20.8	14.6	16.4	19.1	19.5	18.4	11.2	10.3	15.5	12.6	20.8	13.2	14.1	13.9	19	24
ATR	2.43	1.85	2.63	2.01	1.7	2.14	3.39	2.7	2.78	2.54	3.24	2.28	2.37	1.95	2.46	2.38	2.2	1.41	2.49	2.81	1.13	2.36	3.03	2.89	2.68	2.42	2.05	3.64	3.14	3.64	3.24	2.18	1.76	2	3.32	3.17	3.21	2.03	2.32	2.68	2.61	3.51	2.84	2.81	3.29	2.81	3.27	2.54	2.97
ATRIP	3.74	2.7	3.31	3.11	3.4	3.08	3.15	2.39	2.73	2.71	3.35	3.02	3.6	3.8	3.07	3.55	2.7	3.03	3.92	3.83	4.66	2.73	3.32	3.04	2.46	2.99	3.12	3.16	3.06	3.75	3.22	3.43	4.88	3.26	3.58	2.86	3.04	3.59	3.39	3.39	3.27	3.09	3.17	2.88	2.68	3.32	2.75	3.35	3.46
ATRN	1.56	0.924	2.47	1.45	1.65	1.32	1.54	1.22	1.42	2.38	1.59	1.73	1.73	1.9	1.52	1.53	1.84	1.89	1.72	1.97	2.05	1.91	1.76	1.53	1.49	1.49	1.14	2.39	2.48	2.24	1.92	1.21	1.57	0.963	1.17	1.45	1.82	1.53	1.41	1.82	1.65	2.05	2.11	1.51	2.14	1.73	2.22	1.31	1.3
ATRNL1	0	0	0.00386	0	0	0	0.00252	0	0.00847	0.00699	0.00127	0.00435	0	0	0.00163	0.00928	0	0	0.00667	0.00633	0.00223	0.00128	0.00317	0.00512	0.00221	0	0.00476	0.00209	0.00479	0	0.00686	0.00223	0.0027	0.00818	0.00196	0.00666	0	0.0028	0	0	0	0.00093	0	0.00239	0.00462	0.00174	0	0	0
ATRX	2.79	2.84	3.13	3.81	4.05	4.47	3.6	3.53	4.02	3.71	2.97	3.08	2.07	2.19	3.2	2.76	3.14	2.48	2.51	2.81	1.6	4.13	3.36	4.29	4.09	4.53	5.25	4.64	4.2	4.24	3.55	2.68	2.51	2.99	5.36	3.86	3.26	2.18	2.47	6.45	5.73	4.62	2.69	2.89	6.24	3.24	4.35	2.57	2.62
ATXN1	6.85	6.23	4.7	8.04	8.41	11.7	5.57	6.5	6.79	5.59	3.37	4.18	4.06	3.13	4.13	4.05	5.65	9.55	3.82	3.99	2.96	6.66	5.05	7.32	6.04	9.65	10.5	3.94	3.8	5.02	3.57	5.08	2.65	6.13	7.82	3.96	4.02	4.07	5.06	12.1	8.95	4.87	3.43	3.64	8.67	6.29	6.17	4.27	4.32
ATXN10	8.46	11.3	8.32	7.54	8.13	7.33	9.78	8.43	7.31	11.8	11.4	11.7	11.2	13	9.81	10	11.2	8.23	10.6	12.1	11	9.6	10.9	8.62	9.03	7.93	6.28	14.3	12.5	10.1	13.7	10.6	13.6	8.04	8.08	11.1	12	11.4	9.39	7.48	8.05	10.9	10	11.3	9.84	10.1	10.9	12.3	12.7
ATXN1L	4.74	3.97	5.79	7.71	6.63	7.53	5.48	6.44	7.18	5.18	4.81	4.79	4.45	3.17	5.09	4.92	5.56	4.98	5.5	4.95	3.44	6.77	6.01	6.49	6.56	6.16	7.67	5.43	5.49	6.28	5.05	4.68	2.42	5.35	6.75	4.63	5.5	3.51	4.36	8.15	6.84	5.51	4.54	4.66	7.16	5.26	6.33	4.49	4.18
ATXN2	2.68	2.44	3.39	3.51	4.34	3.42	3.45	2.29	3.52	3.26	2.98	2.69	2.81	2.51	3.47	2.63	2.97	3.57	2.92	3.32	3.16	3.46	3.2	3.2	3.4	4.13	3.19	3.02	3.43	3.33	2.85	1.92	1.72	2.53	3.01	2.82	2.46	3.02	2.76	3.91	3.23	2.95	3.09	2.55	3.46	2.46	3.38	2.55	2.22
ATXN2L	23.6	15.7	25.6	22	23.4	18	27.1	18.7	21.3	20.6	25.9	21.2	25.3	20.8	26	24.8	18.4	22.5	33.5	30.8	19.8	21.8	21.2	21	23.1	23.2	18.2	16.8	22.4	28.7	23.8	18.3	14.7	20.4	16.9	24.5	18.5	29.6	27.8	19.9	22.2	21.3	28.2	20.3	22.3	20.3	22.8	28.1	23.1
ATXN3	2.12	2.45	1.96	2.29	1.79	2.88	2.78	2.49	2.94	2.95	2.41	2.17	1.87	1.53	2.39	2.1	1.88	2.13	2.07	1.87	1.76	2.24	3.16	3.66	2.47	2.33	2.67	2.8	2.59	2.31	2.35	2.07	1.9	1.85	2.48	2.64	2.73	1.77	2.06	2.59	2.75	2.79	2.18	2.58	2.69	2.31	2.3	2.97	2.47
ATXN3L	0	0	0	0	0	0	0	0	0	0.00871	0	0	0.0246	0	0	0	0	0	0	0	0	0	0	0	0.011	0	0	0	0	0	0	0	0	0	0	0	0	0.014	0	0.00936	0	0	0.00625	0	0	0	0	0	0
ATXN7	10.2	11.5	9.77	11.9	11.5	13.3	10.3	8.8	12.9	9.38	7.23	6.02	5.16	4.41	7.85	6.74	7.6	6.5	6.23	5.95	3.83	11	8.88	10.3	10.6	10.7	17.1	8.21	8.57	9.26	8.55	8.75	4.81	15.2	25.6	9.55	8.45	6.08	7.88	24.5	21.4	12.2	7.57	9.33	18.1	10.6	9.89	6.68	8.11
ATXN7L1	1.98	1.82	2.12	2.09	1.76	2.3	1.94	1.74	2.18	2.19	1.99	2.05	1.66	1.49	1.99	2.03	1.85	2.07	1.87	2.39	1.58	2.29	2.61	1.92	1.88	1.53	2.25	2.42	2.17	2.36	2.42	1.84	1.56	1.84	2.6	2.12	2.72	1.46	1.96	2.83	3.57	2.8	2.06	1.99	2.41	2.53	2.54	1.97	1.93
ATXN7L2	2.03	1.97	3.31	2.63	2.68	1.73	2.86	2.36	2.26	1.89	3.52	2.47	3.4	3.26	3.04	2.84	2.36	2.11	4.08	3.59	2.83	2.36	2.71	2.41	2.99	2.5	2.41	2.24	2.36	3.03	2.97	2.85	2.75	2.33	1.88	2.71	2.57	3.82	3.12	1.73	2.13	2.28	3.48	2.68	2.63	2.46	2.51	3.24	3.1
ATXN7L3	32.4	29.8	34.3	41.2	49.3	35.3	26.5	35	24.7	26	25	31.8	32.8	31.1	29.8	29.1	35.3	43.6	29.9	31.5	32.6	33.3	27.2	32.8	33.1	41.7	45.1	22.9	25.4	24.9	26.7	26.4	24	42.1	26.4	25.4	23.2	32.8	34.1	37.6	32.4	22.8	31.8	24.9	28.3	26.7	27.7	32.4	24
ATXN7L3B	17.3	15.1	21	21.9	18.8	23	24.5	21.3	24.9	21.8	23.6	22.3	20.2	19.3	23.1	25.4	22.7	16.5	20.6	25.3	17.9	23.4	27.4	21.4	22.5	20	22.9	28.4	26.6	22.3	22.9	18.6	14.1	17.2	21	19.4	23.6	20.6	19.6	21.3	19.3	23.2	22	21.9	21.7	18.7	20.5	18.9	19.5
ATXN8OS	0	0	0	0	0	0	0	0	0	0	0.00756	0	0.0147	0	0	0	0	0	0	0	0	0	0	0	0	0	0	0	0	0	0	0	0	0.0162	0	0	0	0	0	0.0112	0	0	0	0	0	0	0	0	0.00854
AUH	3.1	5.16	2.71	5.45	3.9	3.81	2.87	3.37	4.32	3.63	3.54	3.46	2.79	2.76	3.3	3.02	3	3.1	3.52	2.55	2.41	3.09	3.56	3.7	2.87	3.32	4.3	3.15	3.26	3.3	2.86	4.25	2.95	3.52	3.37	2.94	3.9	2.63	3.12	4.33	3.27	3.11	2.37	3.39	3.01	2.79	2.76	3.04	3.1
AUP1	65.8	67.1	66.1	59.7	80.4	59.5	64.5	64.2	68.3	66.8	68.8	62.3	82.9	84	67.5	69.4	60.9	90.2	94.2	71.4	101	63	61.3	77.7	62.2	67.7	66.9	55.9	60.2	60	59.9	68	98.3	68	46.5	65	53	96.3	72.4	47.5	57	67.8	68.9	69.6	58	65.5	56.8	64.6	73.5
AURKA	0.481	1.47	0.648	0.364	0.625	0.287	0.627	0.311	0.261	0.425	0.297	0.378	0.559	0.451	0.515	0.371	0.572	0.521	0.336	0.492	0.643	0.401	0.304	0.395	0.288	0.463	0.473	0.495	0.406	0.484	1.19	1.69	0.896	1.06	0.677	0.348	0.536	0.37	0.37	0.348	0.801	0.995	0.795	0.61	0.37	0.73	1.72	0.449	0.853
AURKAIP1	63.6	55.9	41.2	69.1	73.2	46.6	32.6	44.8	36.1	36.1	37.7	47.9	53.3	82.2	48.5	50.2	44	61.6	59.8	44.8	86.9	41.3	38.6	43.3	41.4	58.9	56.6	21	33.1	37.5	33.4	54.4	105	84.5	37.7	39.9	34.5	51.9	50.9	45.1	53	33.9	43.8	34.4	32.7	48.4	33.3	44.9	43.8
AURKAPS1	0.203	0.153	0.102	0.284	0.23	0.213	0.251	0.204	0.289	0.169	0.174	0.231	0.0702	0.126	0.167	0.176	0.117	0.194	0.126	0.12	0.216	0.182	0.222	0.407	0.195	0.223	0.419	0.202	0.197	0.173	0.195	0.19	0.0306	0.201	0.244	0.246	0.179	0.0398	0.179	0.256	0.23	0.19	0.107	0.203	0.333	0.139	0.207	0.289	0.319
AURKB	2.01	3.45	1.39	1.97	1.66	1.39	2.04	1.98	1.24	1.29	1.22	1.09	1.56	1.13	1.12	0.989	1.16	3.01	1.6	1.81	2.77	1.27	0.825	2.13	1.31	1.34	2.15	1.25	0.871	1.4	3.06	6.35	4.84	4.74	2.21	1.24	1.17	1.74	1.75	0.772	2.3	4.07	1.92	2.07	1.32	2.06	4.72	1.35	3.01
AURKC	0.44	0.226	0.449	0.175	0.311	0.31	0.271	0.253	0.284	0.282	0.145	0.331	0.597	0.299	0.241	0.363	0.34	0.833	0.358	0.397	0.585	0.147	0.255	0.309	0.23	0.0989	0.559	0.162	0.161	0.468	0.276	0.0899	0.362	0.22	0.171	0.246	0.197	0.357	0.468	0.278	0.181	0.206	0.429	0.248	0.279	0.246	0.335	0.342	0.357
AUTS2	0.945	0.53	0.948	1.45	1.37	0.68	1.31	1.18	1.33	1.13	2	1.84	0.767	0.575	1.17	1.23	1.42	0.3	4.33	1.52	0.743	1.02	1.2	2.7	1.56	0.996	0.85	1.41	1.23	2.73	1.32	0.99	0.487	0.567	0.645	1.08	1.35	0.81	0.474	1.05	0.558	0.842	0.806	0.714	1.57	1.05	1.8	0.435	1.17
AVEN	2.38	1.54	1.97	1.39	2.01	1.48	2.62	1.77	2.01	2.1	2.72	2.11	2.86	3.08	2.04	2.5	2.51	1.34	1.81	2.47	2.68	2.09	2.07	1.73	1.94	1.54	1.38	2.71	2.1	2.18	2.53	2.99	3	1.99	1.61	1.76	1.83	2.58	2.45	1.54	1.42	2.47	2.63	2.19	1.47	2.63	2.35	1.8	3.31
AVIL	5.65	6.18	8	16.6	10.2	34.5	7.22	6.17	15.5	6.81	4.47	3.32	4.88	4.84	8.53	4.3	6.23	14.2	4.26	3.7	4.52	11.5	6.74	8.09	4.6	12.1	17.8	3.09	4.48	2.53	2.52	3.45	1.89	9.4	13.2	5.89	2.54	3.53	6.54	8.32	7.08	4.06	3	3.13	6.25	3.23	2.42	4.54	3.66
AVL9	6.71	7.96	7	11.3	7.19	14.2	6.02	7.06	9.9	6.66	5.15	6.29	4.25	3.98	6.62	5.7	5.87	6.8	5.21	5.13	3.73	9.24	7.5	8.74	8.53	8.95	13.3	6.87	6.54	6.35	5.84	6.09	4.24	8.34	12	6.4	7.04	4.38	4.99	13.4	11.8	8.58	5.1	6.01	11.2	7.43	8.36	5.81	5.9
AVP	0	0	0.0182	0	0	0	0	0	0.0797	0	0.018	0.0205	0.0698	0	0	0.0218	0	0	0.0314	0.0149	0.0315	0	0	0.0542	0.0936	0	0	0	0.0507	0	0	0	0.076	0	0	0	0.1	0.0593	0.0469	0	0	0	0	0	0	0.0492	0	0.103	0.0406
AVPI1	1.01	0.762	0.662	0.436	0.599	0.193	0.578	0.509	0.682	0.943	1.1	0.546	0.822	1.1	0.789	0.776	1.04	1.4	0.796	1.07	1.04	0.62	1.15	0.474	0.465	0.37	0.463	0.585	1.19	0.931	0.786	0.854	1.59	0.582	0.319	0.459	1.65	0.879	0.855	0.507	0.824	0.799	0.637	0.839	0.561	0.821	1.02	0.798	1.28
AVPR1A	0.0314	0.00709	0.00541	0	0.0852	0.0278	0.0133	0.0119	0.0119	0.0367	0.0295	0.0214	0.026	0.0298	0.0378	0.0293	0.0237	0.00652	0.0374	0.0355	0	0.0135	0.0111	0.00538	0.0535	0.0103	0.02	0.0264	0.0327	0.0225	0.0252	0.0422	0.0113	0	0.0781	0.042	0.0213	0.00589	0.0245	0.0474	0.0771	0.0176	0.0685	0.0125	0.0454	0.0147	0.0256	0.0115	0.00605
AVPR1B	0	0	0	0	0.0143	0	0	0.0186	0.0139	0	0	0	0	0	0	0	0.0185	0	0	0.0052	0	0	0	0.00631	0.00545	0	0.0117	0.00516	0	0.0088	0	0	0	0	0	0.0082	0.00999	0	0	0	0	0.00916	0	0	0	0	0.00599	0	0.00709
AVPR2	0.095	0.0671	0.333	0.199	0.207	0.228	0.206	0.135	0.242	0.257	0.38	0.358	0.266	0.242	0.254	0.308	0.202	0.259	0.443	0.344	0.258	0.271	0.362	0.25	0.537	0.186	0.189	0.142	0.272	0.377	0.212	0.169	0.204	0.239	0.148	0.338	0.145	0.156	0.291	0.12	0.177	0.189	0.604	0.19	0.209	0.194	0.218	0.26	0.178
AWAT1	0	0	0	0	0	0	0	0	0.0176	0	0	0	0	0	0	0.00965	0	0	0	0	0	0.00802	0.0198	0	0	0	0	0.0131	0.00747	0.0223	0.0107	0	0	0	0.0488	0	0.00633	0	0	0	0	0.0116	0	0.0149	0	0	0.0152	0	0
AWAT2	0	0	0	0	0	0	0	0	0	0	0	0	0	0	0.00672	0	0	0	0	0	0	0	0	0	0	0	0	0.00431	0	0.00735	0	0.00917	0	0	0	0	0	0	0.0137	0	0	0	0	0.00491	0	0	0	0	0
AXDND1	0	0.0162	0.00617	0.0156	0.0139	0.00528	0.0121	0.00905	0.0203	0.00838	0.00611	0	0	0.0146	0.00784	0.00741	0.0045	0.0223	0.00533	0.0278	0.0161	0.00308	0.00253	0.00307	0.0159	0.00589	0.0171	0.00753	0.00574	0.00857	0	0	0.0129	0.00654	0.00938	0.00399	0.00486	0.0134	0.00797	0.018	0.00926	0.00446	0.0361	0.00572	0.0444	0	0	0	0
AXIN1	19.9	18.5	18	26.1	26.1	17.4	15.1	19.8	15.8	14.6	17.9	18.4	22.3	21.9	18.9	19.7	17.7	20.8	30	19.5	21	19.4	17.1	17.9	18.9	18.3	21	13	18.3	19.6	16.2	19.2	20	24.1	13.7	15.6	16.9	18	20.5	16.3	18.2	13.1	18.4	15.1	17	16.2	15.7	20.2	17
AXIN2	1.03	0.654	1.29	1.08	0.633	1.25	2.08	1.09	1.51	1.67	2.18	2.26	0.964	2.02	2.39	3.48	1.71	0.576	0.89	2.75	0.811	1.06	2.94	0.557	2.58	1.22	0.878	3.2	3.46	1.47	1.99	0.755	0.945	0.54	1.22	2.82	1.91	1.9	1.63	0.713	1.62	1.82	1.47	1.13	1.21	0.64	2.03	2.1	0.671
AXL	0.154	0.211	0.176	0.052	0.0853	0.0568	0.0465	0.0383	0.0495	0.087	0.0634	0.112	0.0729	0.0634	0.0633	0.0542	0.128	0.0457	0.107	0.125	0.169	0.0828	0.132	0.0449	0.0367	0.0634	0.0833	0.125	0.19	0.32	0.512	0.128	0.725	0.0402	0.0829	0.169	0.479	0.17	0.0919	0.322	0.53	0.391	0.254	0.601	0.156	0.357	0.182	0.147	0.435
AZFP	0	0	0.0101	0.0342	0.0684	0	0.00995	0	0	0	0	0	0.0195	0	0.0129	0.0122	0	0	0	0	0.0176	0.0202	0	0	0	0.0387	0	0	0	0.0282	0	0	0	0	0	0	0	0	0	0	0	0	0	0	0	0	0	0	0
AZGP1	0	0	0.00888	0.015	0.02	0	0.00871	0.013	0	0	0.0176	0	0	0	0	0.0107	0	0	0	0	0	0	0.0146	0.0177	0.0153	0	0	0	0	0	0.0592	0.0154	0	0	0	0.023	0	0.00967	0.0229	0	0	0.0193	0	0.0165	0.0106	0	0	0	0.00993
AZGP1P1	0	0.0249	0	0	0	0	0	0	0	0	0	0	0	0	0	0.0114	0	0	0	0.0078	0.0165	0.00949	0	0	0	0.0182	0	0	0.0177	0	0.0127	0	0	0	0	0	0.0075	0	0	0	0.0143	0	0	0	0	0	0	0	0
AZI1	3.03	1.84	2.56	2.49	2.5	1.99	2.09	2.21	2.42	1.87	2.75	2.56	3.09	3	2.61	2.73	1.92	2.88	3.88	2.85	8.19	2.12	2.02	2.33	2.87	2.39	2.2	1.6	2.35	2.84	2.03	2.23	2.97	2.55	2.08	2	2.01	2.95	2.73	1.51	2.39	1.82	3.18	1.94	2.21	2.42	2.24	2.84	2.81
AZI2	7.19	11.8	4.35	7.65	5.19	7.23	5.48	8.32	7.58	9.1	5.43	5.3	3.88	3.48	5.55	4.6	4.46	5.57	6.19	3.68	2.92	5.97	6.52	9.04	5.87	7.71	8.57	7.55	7.96	7.46	6.23	9.46	8.18	7.85	11.3	8.6	10.6	5.3	3.6	14.5	10.7	10.8	5.39	10.9	8.91	10.3	6.4	6.96	7.65
AZIN1	10.9	14.6	11.9	20.6	23	19.7	12.9	20.9	15.9	16.5	10.7	13.6	9.06	7.98	12.9	11.2	14.1	17.9	7.91	10.5	8.19	20.1	12.6	18	11.4	19.2	34.2	14.1	16.2	13	12.2	10.4	9.09	19.8	15.7	11.8	13.6	9.13	8.91	24.9	17.8	14.4	10.4	11.8	13.4	12.3	14.5	10.6	10
AZU1	4.28	12.2	1.03	20.3	22	4.36	0.556	2.13	24.4	54.5	2.33	1.21	2.25	13.1	2.41	1.61	1.87	34.6	5.54	2.28	6.18	2.27	1.12	4.03	1.59	2.07	5.94	2.35	4.65	2.58	0.723	15.8	32.9	5.72	4.06	1.53	28.8	0.845	12.5	2.21	2.7	8.92	1.82	4.74	1.14	4.61	1.93	9.29	9.75
B2M	8410	13700	2720	9660	6220	8570	6750	8370	9670	6600	6900	7050	5410	6370	6270	5260	7850	6780	6830	3040	5420	5640	5340	8390	7160	9370	11900	5490	5770	4050	4580	13300	12100	15200	10600	8270	6760	6200	5350	7240	6090	6850	4140	8550	8110	7660	4030	6550	9470
B3GALNT1	0.0715	0.712	0.0771	0.167	0.18	0.116	0.176	0.281	0.0847	0.201	0.159	0.0766	0.101	0.0437	0.169	0.156	0.054	0.126	0.101	0.0911	0.0482	0.24	1.29	0.255	0.154	0.218	0.308	0.158	0.164	0.171	0.119	0.166	0.0776	0.209	0.122	0.148	0.178	0.0974	0.0956	0.207	0.125	0.216	0.0692	0.22	0.251	0.109	0.137	0.187	0.162
B3GALNT2	1.42	1.66	2.02	1.61	1.25	1.87	2.36	1.96	1.32	1.64	1.65	1.69	1.37	1.08	2.13	1.42	1.69	1.16	1.53	1.63	1.54	1.26	2.1	1.32	2.22	1.55	1.28	3.05	2.13	2.02	1.97	1.77	1.61	1.34	1.36	1.96	2.63	1.78	1.54	1.38	1.74	2.31	1.36	2.4	2.02	2.3	1.95	1.48	2.49
B3GALT1	0	0	0	0	0	0	0	0	0	0	0	0	0	0.0163	0	0	0	0.0125	0	0	0.018	0.0207	0	0.0155	0	0	0	0	0.00482	0.0144	0	0	0	0	0	0	0.00409	0	0	0	0	0	0.0101	0	0	0	0	0	0
B3GALT2	0.316	0.199	0.431	0.523	0.164	0.282	0.23	0.186	0.539	0.688	0.398	0.564	0.164	0.134	0.668	0.316	0.503	0.0382	0.197	0.418	0.115	0.12	0.97	0.233	1.05	0.356	0.345	0.582	0.51	0.202	0.283	0.373	0.0464	0.0201	0.38	0.393	0.305	0.486	0.294	0.217	0.399	0.304	0.0802	0.285	0.353	0.0644	0.374	0.3	0.212
B3GALT4	16.2	14.2	11.9	15.1	16.1	11.1	9.89	13.5	10.5	10.4	10.8	12.8	15.3	18.6	11.6	13.3	12.1	18.3	16	11.4	20.7	11.8	11.8	11.7	9.61	12.1	13.5	6.97	8.32	10.4	8.56	13.2	21	18.2	8.63	10.3	10.2	11.4	11.3	12	11	8.5	14.4	10.6	9.03	15.6	9.22	12.2	12.5
B3GALT5	0	0	0	0	0.00718	0	0	0.00937	0.00351	0	0	0	0	0	0.00811	0	0	0	0	0	0	0	0	0	0	0.00609	0	0	0	0	0	0	0	0	0	0	0	0	0	0.014	0	0	0	0	0	0	0	0	0
B3GALT6	4.63	3.94	5.08	5.56	3.98	3.77	4.14	4.52	3.75	5.31	4.7	5.47	6.33	8.63	5.19	5.87	4.77	3.68	8.53	6.19	6.64	4.58	5.69	4.38	4.27	4.08	2.95	5.19	5.25	5.58	4.35	4.05	6.68	3.79	3.49	5.34	5.27	5.58	4.66	3.47	3.67	4.32	4.48	4.63	3.91	4.58	4.15	6.64	4.67
B3GALTL	0.525	0.531	0.616	0.679	0.731	0.661	1.05	0.711	0.928	0.967	0.887	0.917	0.758	0.599	0.877	1.1	0.925	0.36	0.977	0.85	0.574	0.883	0.943	0.865	0.815	0.743	0.552	1.35	1.23	1.22	0.796	0.601	0.536	0.503	0.717	0.845	0.885	0.673	0.785	0.584	0.64	0.765	0.668	0.757	0.939	0.766	0.633	0.836	0.814
B3GAT1	2.11	4.61	2.1	2.06	5.8	0.631	3.9	4.99	1.86	0.635	3.38	2.83	3.8	0.807	1.49	1.64	2.13	0.215	11.8	1.68	1.57	3.05	1.37	4.38	1.67	0.627	0.886	0.995	0.712	4.96	3.85	6.83	1.08	3.21	0.532	1.86	1.8	0.776	3.94	2.21	0.641	1.97	2.63	1.88	3.66	7.02	1.61	0.764	5.53
B3GAT2	1.34	1.09	1.06	1.27	3.31	0.899	1.44	1.22	1.24	1.91	1.29	1.42	1.5	2.72	1.27	1.66	2.03	2.11	1.22	1.77	2.31	2.16	1.56	1.27	1.23	1.11	1.07	2.04	1.93	1.56	1.55	1.28	2.13	0.915	0.976	1.52	1.06	2.01	1.52	1.54	1.5	1.24	1.42	1.51	1.43	1.15	1.16	1.16	1.58
B3GAT3	12.3	9.57	11.8	10.8	11.8	8.06	10.7	11.1	8.97	10.3	12	11.1	17.5	19.3	12	13.4	10.1	12.7	16.7	14.5	24.5	10.2	10.1	9.63	10.6	9.14	7.95	9.77	10.2	11.9	11.3	12.5	24.5	12	7.85	10.6	12	15.3	13.4	7.48	9.31	9.03	13.6	12.6	8.21	14.7	10.5	14.3	12.7
B3GNT1	1.32	0.911	1.62	1.34	1.32	1.4	1.36	1.14	1.41	1.25	1.52	1.7	1.33	2.19	1.5	2.12	1.59	1.14	1.87	2.06	1.92	1.2	1.69	0.989	1.58	0.808	0.873	1.64	2.04	2.1	1.99	1.35	1.68	1.04	1.07	1.52	1.49	1.57	1.29	0.952	1.12	1.42	1.49	1.24	1.18	1.45	1.6	1.79	1.06
B3GNT2	5.97	10.7	4.16	17	6.5	9.53	6.18	10.5	9.5	9.41	5.43	6.45	3.82	3.07	6.07	5.14	4.59	6.69	4.83	4.23	3.2	9.42	6.68	8	7.97	13	14.2	9.5	6.32	5.87	6.2	7.85	4.87	12.4	12	7.01	8.71	4.61	5.53	12.7	14.3	8.45	5.35	8.02	11.3	8.26	7.51	6.52	6.32
B3GNT3	0.0192	0.0758	0.178	0.0488	0.149	0.0141	0.166	0.0545	0.0544	0.118	0.184	0.158	0.135	0.24	0.215	0.0794	0.0783	0.0199	0.0786	0.173	0.0574	0.0824	0.136	0.0329	0.209	0.0236	0.107	0.121	0.104	0.143	0.011	0.115	0	0.0438	0.0502	0.123	0.114	0.139	0.08	0.109	0.18	0.0806	0.197	0.0996	0.0693	0.0392	0.102	0.128	0
B3GNT4	0.0693	0.0588	0.0448	0.0756	0.0504	0.0256	0.0733	0.0438	0.082	0.0304	0.074	0.0927	0.0574	0.0705	0.0759	0.0718	0.0218	0	0.0388	0.0735	0	0.0447	0.0368	0.0446	0.0706	0.0855	0.0552	0.0304	0.0139	0.0311	0.0399	0.0259	0.0156	0.0317	0.0114	0.0193	0.0766	0.0732	0.106	0.0327	0	0.0432	0.0437	0.0693	0.0358	0.0304	0.0141	0.0317	0.0334
B3GNT5	3.39	4.5	2.08	4.66	3.79	8.26	2.57	3.39	2.43	4.06	1.1	2.62	1.35	1.5	3.22	1.42	3.55	3.66	1.21	1.31	1.09	4.67	2.72	4.38	3.58	7.56	8.18	2.28	2.16	2.26	1.05	2.6	2.2	2.89	5.14	2.3	1.89	1.09	2.6	9.17	7.02	2.91	1.85	2.26	4.49	2.94	3.92	3.11	1.92
B3GNT6	0	0	0	0	0	0	0	0	0.00491	0	0	0	0	0	0	0	0	0	0	0	0	0.00446	0	0	0.00384	0	0	0	0.00416	0	0	0	0	0	0	0	0	0	0	0	0	0	0	0	0	0	0	0.0126	0
B3GNT7	0.596	0.349	0.496	0.408	0.3	0.339	0.745	0.586	0.466	0.257	1.36	0.5	0.518	0.307	0.366	0.771	0.172	0.314	0.204	0.412	0.393	0.445	0.692	0.241	0.386	0.408	0.361	0.499	0.712	0.409	0.727	0.828	0.416	0.512	0.829	0.405	0.87	0.348	0.384	0.394	0.181	0.614	0.927	0.969	0.631	0.147	0.92	0.219	1.3
B3GNT8	30	44	29.6	49.4	65.7	29.8	11.6	37.2	24.1	16.6	11	22	28.3	38.7	24.2	23.1	24.7	24.1	16.8	16.5	39.4	33.8	11.7	28.7	17.7	25.6	43	5.75	10.5	11.7	8.77	19.5	38.2	59.4	21.6	12.4	6.62	23	20.5	37.3	29.9	11.1	20	11.1	20.7	27	15.2	20.2	7.39
B3GNT9	3.1	3.74	3.06	4.25	3.87	4.53	2.62	2.91	2.87	3.01	2.51	2.85	2.98	3.86	3.09	2.98	3.22	6.28	2.66	3	4.34	3.11	3.14	2.79	3.15	3.01	4.04	2.04	2.19	2.26	2.62	2.83	3.66	2.87	2.53	2.71	1.71	3.98	3.52	2.91	3.93	2.74	3.06	2.33	2.76	3.07	2.82	3.38	2.64
B3GNTL1	12.1	12.8	10.9	18	17.1	19.3	5.67	10.8	9.6	10.3	6.76	9.1	9.32	9.84	10.6	6.83	7.46	21.1	10	6.36	12.7	8.83	9.42	11.6	10.9	14	20.2	3.31	7.46	5.14	4.51	8.82	12.8	15.7	10.7	5.6	6.26	10.5	12.8	15.7	11.5	5.12	8.71	5.77	9.5	6.85	6.11	6.93	7.05
B4GALNT1	0.0519	0.108	0.0224	0.0881	0.042	0.0703	0.0476	0.0274	0.0819	0.00507	0.0148	0.0379	0.00717	0.0528	0.128	0.0404	0.0435	0.054	0.0839	0.0367	0.0778	0.0261	0.0736	0.0594	0.0289	0.171	0.069	0.0213	0.0208	0.0363	0.0498	0.0324	0.0469	0.0712	0.0454	0.0145	0.0147	0.0569	0.0145	0.0109	0.0616	0.0216	0.0182	0.0104	0.0403	0.0354	0.0141	0.0369	0.0376
B4GALNT2	0	0	0	0	0	0.00911	0	0	0	0	0	0	0.0205	0.00837	0	0	0	0	0	0	0	0.00531	0	0	0	0	0	0.00867	0	0.0074	0.0142	0	0	0	0	0.00689	0.0042	0	0	0	0.00799	0	0.00519	0	0.00638	0	0.00503	0	0.00596
B4GALNT3	1.08	0.163	0.144	1.1	1.25	0.431	0.282	1.28	0.757	0.373	0.291	0.299	1.25	0.987	0.116	1.25	1.06	0.701	0.316	0.198	0.267	0.359	1.03	3.21	0.34	0.729	0.29	0.851	1.58	0.999	1.1	1.25	0.116	1.41	0.507	0.135	0.757	0.914	0.988	0.874	1.35	0.626	1.11	0.0606	0.0783	0.797	0.899	0.526	0.99
B4GALNT4	0.309	0.239	0.211	0.406	0.819	0.495	0.252	0.31	0.382	0.296	0.329	0.418	0.344	0.338	0.649	0.708	0.322	0.337	0.534	0.299	0.232	0.198	0.28	1.41	0.615	0.292	0.241	0.0953	0.154	0.375	0.343	0.525	0.375	0.269	0.158	0.341	0.485	0.22	0.647	0.342	0.347	0.416	0.498	0.317	0.417	0.287	0.36	0.607	0.571
B4GALT1	34	29.6	40.3	50.6	51.7	42.9	25.6	35.4	33.3	30.7	25.5	26.4	31.8	26.9	28	27.3	35.7	42.6	22.1	32.3	46.8	42.6	24.9	36.4	26.6	49.9	60.6	22.3	22.3	23.9	27.7	29	31.4	46.1	29.3	22.1	18.3	26.2	32	54.5	41	33.4	27.8	21.5	31.5	24.3	37.4	24.9	28.2
B4GALT2	0.859	1.42	0.829	0.531	0.542	0.325	0.718	0.768	0.407	0.39	0.688	0.753	1.09	0.546	0.736	0.724	0.75	0.547	1.14	0.775	1.01	0.342	0.567	0.908	0.808	0.822	0.343	0.505	0.535	1.26	0.989	2.39	1.18	0.933	0.556	0.485	0.731	0.56	1.09	0.514	0.66	1.86	0.871	0.799	0.594	1.16	1.13	0.55	1.97
B4GALT3	22.1	23.1	16.3	13.4	16.2	15.8	16.6	13.1	12.2	12.3	17.6	17.6	26.6	17.6	16.4	18.2	17.2	14.8	23	19.6	22.1	11.8	14	15.4	14.4	14.2	11.3	15.1	13.5	18.7	18.6	22.3	20.3	17.4	10.2	14.5	14.9	16.8	18.7	10.5	15	16.5	16.7	16.6	14.4	17.4	15.6	17	23
B4GALT4	3.83	5.55	2.66	9.03	6.32	5.71	4.51	7.43	6.75	4.62	3.98	3.96	3.29	3.36	3.37	3.71	4.61	3.43	5.79	3.11	3.11	4.75	3.84	7.7	3.38	4.11	10.9	4.28	5.5	4.76	3.87	3.77	5.18	14.4	4.8	5.02	4.43	3.43	3.71	9.29	4.91	5.81	3.27	4.89	5.31	5.54	5.46	4.02	4.34
B4GALT5	40.6	42.1	38.3	53.5	98.8	73	18.8	34	31.3	23.5	13.5	23.4	19.1	15.8	19.6	14.3	35.3	70.2	17.4	13.5	38.1	43.4	19.7	32.8	23.4	118	116	11.5	21.1	21.5	19.2	28.9	19	66.8	59.6	19.9	17.2	21.7	26.5	96.4	65	17.1	28.4	19.1	52.4	51.5	40.3	20.1	22.4
B4GALT6	0.108	0.257	0.21	0.189	0.121	0.292	0.302	0.308	0.489	0.384	0.277	0.274	0.161	0.0734	0.166	0.179	0.218	0.113	0.456	0.101	0.0608	0.27	0.387	0.379	0.227	0.147	0.311	0.439	0.341	0.379	0.112	0.21	0.112	0.0643	0.202	0.244	0.39	0.0686	0.112	0.501	0.0911	0.196	0.116	0.359	0.408	0.158	0.287	0.089	0.154
B4GALT7	12	10.8	6.81	6.24	4.73	5.34	6.07	7.11	6.66	7.26	9.21	7.07	11	14.8	8.05	8.17	8.16	13.2	11.1	11	11.1	5.26	7.64	6.22	7.3	9.16	4.89	6.36	9.29	9.14	7.65	8.23	11.7	8.51	7.9	9.06	7.8	8.96	7.14	4.04	4.4	6.88	9.11	8.35	7.08	7.54	6.95	11.9	10
B7H6	0.151	0.0969	0.268	0.35	0.0356	0.247	0.262	0.147	0.518	0.227	0.343	0.187	0.125	0.0443	0.369	0.248	0.139	0.0424	0.174	0.199	0.0153	0.186	0.438	0.373	0.372	0.185	0.28	0.37	0.292	0.413	0.23	0.171	0.00369	0.116	0.233	0.291	0.99	0.0383	0.0659	0.44	0.195	0.229	0.129	0.255	0.361	0.337	0.385	0.259	0.193
B9D1	0.426	0.531	0.418	0.32	0.313	0.292	0.596	0.483	0.389	0.301	0.489	0.371	0.705	0.338	0.362	0.35	0.268	0.244	0.514	0.498	0.44	0.354	0.359	0.561	0.315	0.35	0.386	0.304	0.306	0.633	0.633	0.911	0.491	0.644	0.289	0.499	0.469	0.324	0.327	0.324	0.408	0.801	0.53	0.452	0.394	0.36	0.616	0.313	0.885
B9D2	15.8	14.3	14.8	21.2	29.2	16.1	8.12	14.6	11.4	10.6	8.51	12.1	13.9	21.4	11.6	12	19.2	27.1	9.53	11.6	29.6	16.3	8.56	11.9	12.5	18.6	22.2	4.89	9.16	7.93	8.01	12.1	20.2	22.9	9.51	7.84	5.42	14.2	15.4	14.6	13.7	6.35	9.97	7.14	9.11	8.98	6.88	10.4	7.32
BAALC	0.0823	0.0724	0.071	0.0998	0.0355	0.0607	0.0928	0.0636	0.0909	0.0589	0.305	0.0801	0.0985	0.093	0.0751	0.0569	0.109	0.0666	0.0818	0.055	0.089	0.106	0.146	0.0864	0.0644	0.211	0.182	0.116	0.176	0.0329	0.0421	0.0615	0.0826	0.15	0.0839	0.0612	0.109	0.0902	0.0662	0.0807	0.0296	0.0399	0.0346	0.106	0.085	0.0267	0.0336	0.0446	0.0882
BAAT	0.00738	0	0.0127	0	0.00716	0	0.0156	0	0.014	0.00433	0	0.0108	0.00612	0.015	0.00809	0	0.00464	0.00768	0.011	0.00522	0	0.00318	0.00261	0.00634	0.0109	0	0.00589	0.0104	0.00593	0.0133	0.00849	0.00552	0.02	0.00675	0	0.0124	0.0176	0.0139	0.0165	0	0.00478	0.0115	0.00621	0.0118	0.00763	0.00863	0.012	0.0135	0.00356
BABAM1	46.3	76.9	28.7	30.9	36.1	33.2	30.1	30.8	23.7	33.6	43.8	37	58.3	58.7	35.5	39.2	42.4	38.8	52.7	36.8	55.4	26.6	29.1	28.8	28.7	30.6	25.6	31.1	32.5	34.8	34.6	51.8	62.9	45.9	29.4	38.6	35.1	43.7	42.3	18.1	23.3	25.9	33.9	36.7	34.6	41.2	30.3	42.4	42.2
BACE1	1.18	0.705	2	1.19	1.01	1.31	1.69	1.25	1.58	1.42	1.73	1.47	1.36	1.31	1.53	1.45	1.25	1.44	1.16	1.89	1.22	1.67	1.7	1.28	1.36	1.12	1.06	1.89	1.69	1.81	1.54	1.04	0.563	0.827	1.19	1.67	1.79	1.48	1.16	1.41	1.51	1.43	1.35	1.51	1.4	1.21	1.43	1.49	1.17
BACE1-AS	1.27	0.96	1.53	1.12	0.697	0.915	1.68	1.69	1.05	0.975	1.95	1.51	1.73	0.863	1.48	1.73	1.29	1.05	1.29	1.99	1	1.21	1.38	1.18	1.52	0.833	1.12	1.55	1.31	1.84	1.65	1.29	0.442	0.746	1.05	1.53	1.44	2.13	1.44	0.885	1.35	1.13	1.29	1.63	1.23	0.821	1.26	1.37	1.23
BACE2	2.25	2.3	1.53	1.31	0.675	1.56	1.02	1.54	1.12	0.765	1	1.27	2.5	1.72	1.5	2.7	2.02	1.57	1.38	2.07	1.93	1.41	1.64	0.463	2.25	2.48	0.868	1.93	1.09	0.907	1.46	1.15	1.17	1.15	2.89	1.5	0.997	3.23	2.46	0.642	0.896	1.8	1.17	0.923	1.07	0.763	1.54	0.827	1.47
BACH1	28.6	29.8	26.6	37.1	37.8	38.1	22	24.5	25.4	26.9	13.9	20.9	13.1	11.7	22.7	13.9	25.2	23.8	11.5	14.9	10.5	31.2	20.4	25.7	29.8	37.6	53	16.9	25.1	21.9	20.8	21.5	18.6	29.5	40.7	20.7	14.5	15.7	24.5	89.2	69.7	24.9	17.5	20.1	44	34.1	27	23.5	15
BACH2	1.48	1.13	2.98	2.12	0.708	2.19	2.71	2.16	3.37	1.7	2.88	2.19	1.67	1.59	3.48	2.88	1.71	1.01	1.06	2.87	1.65	2.17	3.84	1.21	3.28	2.66	1.68	6.63	3.78	2.15	2.98	1.09	1.24	1.82	3.75	3.51	2.93	1.75	1.68	1.34	2.35	2.78	2.05	2.29	2.26	0.911	4.02	2.63	1.27
BAD	14.3	12.2	9.61	15.2	14	10.8	8.42	13.2	8.94	9.4	8.97	12.4	14.6	20.6	13.4	12.6	11.6	15	15.2	10.5	21.8	9.74	10.3	10.1	10.7	13.4	10.9	5.69	8.33	9.13	8.29	14.3	20.6	16.6	7	9.75	8.27	9.7	11.1	7.81	9.05	8.39	11.8	8.26	8.04	12.2	8.24	11.4	11.6
BAG1	35.8	47.4	15.2	29.7	34.8	25.8	11.3	14.4	23.4	28.3	17.2	30.5	34.3	48.3	20.5	24.5	35.1	44.9	36	13.4	30.2	14.2	10.5	13.6	12.2	30.3	22.1	10.1	22.3	25.2	18.9	26.1	52.6	40.9	22.9	21.9	13.2	14.9	31.9	15.9	14.5	8.8	10.6	13.7	20.2	19.3	13.2	20.7	19.7
BAG2	0.787	1.66	0.733	0.914	0.689	1.43	1.7	1.4	1.35	1.24	1.22	1.03	1.16	1.02	1.25	1.53	1.04	0.66	0.776	1.03	0.627	0.896	1.42	1.06	1.24	1.1	1.05	1.61	1.57	1.33	1.66	2.4	1.65	1.03	1.24	1.51	1.38	1.08	0.862	0.656	1.16	1.56	0.901	1.33	1.14	1.22	1.28	1.48	1.63
BAG3	1.86	1.08	2.45	1.56	2.67	1.73	2.57	1.72	1.83	1.82	2.65	2.77	1.89	4.23	2.87	3.32	2.53	1.9	2.65	4.2	3.03	3.42	2.82	1.3	2.59	1.73	1.45	2.74	4.18	2.54	3.22	1.58	2.76	1.28	1.57	2.09	2.04	2.98	2.87	1.61	2.73	2.57	2.94	1.71	1.75	1.77	2.46	2.62	1.59
BAG4	1.14	2.06	1.17	1.87	1.54	1.67	1.4	1.52	1.55	2.02	1.21	1.62	1.15	0.922	1.52	1.35	1.43	1.58	1.14	1.2	0.909	1.76	1.43	2.07	1.51	1.49	2.01	1.89	1.74	1.45	1.41	1.41	1.46	1.3	1.78	1.54	1.9	1.13	1.05	2.24	1.95	1.97	1.12	1.67	1.69	1.6	1.58	1.3	1.44
BAG5	4.6	4.15	5.65	5.77	5.73	6.3	5.56	5.3	7.1	6.27	4.72	5.35	5.19	4.94	5.05	5.25	5.96	5.25	4.6	5.31	5.6	6.58	5.52	6.42	6.25	6.05	6.61	7.5	6.41	5.51	5.73	4.91	5.03	4.51	5.41	5.06	6.34	4.41	4.7	6.44	5.19	6.21	4.82	5.37	5.93	5.04	5.19	4.52	4.86
BAG6	122	125	57.2	56.3	102	55.7	35.3	34.1	30.5	42.2	47.1	60.6	78.2	84.6	54.5	56	60.3	92.4	59.4	51.1	75.3	51.7	33.9	35.3	39.5	95.8	55.1	28.6	44.7	46.7	49.6	46.7	67.9	62.6	48	36.5	32.7	54.3	55.8	44.4	56.5	30	42.4	29.8	48.6	52.5	41.5	45.5	40.4
BAGE	0	0	0	0	0.0251	0	0	0	0	0	0	0	0	0	0	0.0268	0	0	0	0	0.0581	0	0	0	0	0.0213	0	0.00907	0	0	0	0	0	0	0.0169	0	0	0	0	0.0163	0	0	0.0217	0	0	0	0	0	0
BAGE2	0	0	0	0	0.0134	0	0	0	0	0	0	0	0	0	0	0.00714	0	0	0	0	0	0	0	0	0	0.0227	0	0.00967	0	0	0	0	0	0.0126	0.00903	0	0	0	0	0	0	0	0	0	0	0	0	0	0
BAGE3	0	0	0	0	0.0134	0	0	0	0	0	0	0	0	0	0	0.00714	0	0	0	0	0	0	0	0	0	0.0227	0	0.00967	0	0	0	0	0	0.0126	0.00903	0	0	0	0	0	0	0	0	0	0	0	0	0	0
BAGE4	0	0	0	0	0.0137	0	0	0	0	0	0	0	0	0	0	0	0	0	0	0	0	0	0	0	0	0.0233	0	0.00992	0	0	0	0	0	0.0129	0.00927	0	0	0	0	0	0	0	0	0	0	0	0	0	0
BAGE5	0	0	0	0	0.0137	0	0	0	0	0	0	0	0	0	0	0	0	0	0	0	0	0	0	0	0	0.0233	0	0.00992	0	0	0	0	0	0.0129	0.00927	0	0	0	0	0	0	0	0	0	0	0	0	0	0
BAHCC1	0.476	0.31	0.435	0.361	0.313	0.301	0.236	0.258	0.323	0.693	0.393	0.365	0.388	0.311	0.307	0.409	0.364	0.234	0.5	0.396	0.338	0.46	0.305	0.312	0.368	0.314	0.198	0.2	0.503	0.52	0.362	0.391	0.338	0.243	0.326	0.359	0.689	0.73	0.525	0.5	0.477	0.704	0.565	0.411	0.528	0.686	0.647	0.468	0.318
BAHD1	5.93	3.68	6.11	5.83	6.76	4.91	6.15	5.38	5.55	5.27	6.68	6.24	6	6.16	6.69	7.22	6.13	4.23	8.56	7.52	7.27	6.49	6.22	5.79	6.78	4.73	4.45	5.79	6.87	8.06	6.82	5.19	5.03	4.63	4.31	5.55	6.48	6.22	6.44	5.28	5.26	5.44	6.92	5.8	5.81	5.56	6.08	6.56	6.15
BAI1	0.287	0.149	0.193	0.216	0.187	0.198	0.367	0.241	0.212	0.11	0.451	0.206	0.348	0.268	0.225	0.462	0.157	0.118	0.608	0.248	0.113	0.164	0.327	0.247	0.389	0.167	0.12	0.205	0.17	0.395	0.347	0.342	0.272	0.194	0.256	0.294	0.231	0.308	0.307	0.157	0.159	0.206	0.36	0.205	0.365	0.311	0.24	0.571	0.27
BAI2	0.216	0.147	0.199	0.203	0.196	0.107	0.287	0.231	0.23	0.203	0.403	0.398	0.243	0.349	0.237	0.327	0.236	0.065	0.728	0.318	0.299	0.294	0.348	0.339	0.296	0.17	0.276	0.196	0.203	0.43	0.382	0.507	0.117	0.0792	0.082	0.365	0.219	0.251	0.458	0.246	0.0996	0.166	0.257	0.229	0.559	0.287	0.135	0.196	0.32
BAI3	0	0	0.00598	0.0437	0.0314	0.0409	0.00196	0.0263	0.0175	0.019	0.00789	0.00674	0	0.0157	0	0.00719	0.0116	0	0.00345	0.0049	0.0242	0.0139	0.00655	0.00794	0.00171	0.0418	0.0111	0.00162	0.0167	0	0	0.00346	0	0.00422	0.00303	0.00258	0.0126	0.00434	0	0.00582	0.012	0.0072	0.0233	0.00555	0	0.0189	0.0245	0.00282	0.00223
BAIAP2	2.67	1.66	5.08	2.72	4.06	5.24	1.49	1.84	2.23	3.86	1.88	2.01	2.54	3.32	2.35	2.39	2.37	4.91	1.62	2.01	5.67	2.33	2.17	2.24	2.19	2.88	4.67	1.08	2.68	1.84	2.09	2.91	3.46	2.85	2.57	1.58	2.09	3.64	2.29	2	3.69	1.84	3	1.81	2.21	2.03	1.92	2.26	1.23
BAIAP2L1	0.27	0.955	0.505	0.64	0.262	0.833	0.598	0.364	0.501	0.682	0.34	0.456	0.412	0.404	0.404	0.552	0.33	0.568	0.323	0.404	0.234	0.333	0.641	0.42	0.508	0.345	0.481	0.237	0.382	0.451	0.306	0.547	0.103	0.448	0.824	0.443	0.504	0.32	0.289	0.443	0.574	0.372	0.254	0.31	0.587	0.349	0.414	0.411	0.318
BAIAP2L2	0.571	0.549	0.529	0.53	0.565	0.394	0.421	0.63	0.546	0.427	0.591	0.526	0.624	0.807	0.619	0.673	0.382	0.379	0.851	0.571	0.6	0.246	0.538	0.563	0.369	0.36	0.387	0.392	0.351	0.8	0.349	0.2	0.735	0.411	0.366	0.535	0.347	0.838	0.974	0.245	0.519	0.363	0.439	0.51	0.42	0.391	0.485	0.777	0.451
BAIAP3	5.04	4.32	6.26	12.9	11.3	9.78	4.17	8.41	6.83	3.8	6.13	4.78	4.36	5.21	4.72	8.09	6.17	9.97	3.62	5.02	11	5	5.46	4.66	5.26	18.3	9.8	1.25	4.05	4	4.31	6.26	4.09	3.18	8.29	2.67	1.63	7.58	12	3.86	4.91	4.55	6.72	4.87	5.18	5.01	4.86	4.01	4.3
BAK1	3.79	3.26	3.57	1.99	4.02	1.53	3.39	3.64	1.81	1.9	2.12	3.13	4.25	2.77	2.4	2.38	3.23	1.94	3.96	2.98	3.66	3.21	2.94	2.16	1.98	2.26	2.65	2.46	2.3	4	3.22	5.66	4.79	9.16	4.89	2.79	3.13	2.51	3.11	4.4	5.09	3.6	4.26	2.86	3.16	4.57	2.71	3.54	4.84
BAMBI	0.468	0.718	0.137	0.0549	0.454	0.178	0.0639	0.086	0.0644	0.319	0.136	0.0882	0.238	0.174	0.124	0.258	0.228	0.456	0.169	0.192	0.192	0.182	0.193	0.221	0.465	0.336	0.217	0.43	0.091	0.0362	0.382	0.328	0.546	0.18	0.198	0.303	0.108	0.192	0.354	0.286	0.763	0.0895	0.457	0.163	0.258	0.336	0.191	0.221	0.168
BANF1	6.47	7.13	10.3	4.74	6.95	5.99	8.8	6.35	5.97	7.13	9.36	8.8	12.8	14.3	8.19	10.3	10.7	10.4	8.95	11.1	14.2	8.13	7.98	5.14	6.07	6.07	5.57	11.2	8.11	7.4	10.9	10.6	15.1	8.54	5.62	7.28	8.08	11.9	9.67	6.11	5.74	7.8	9.69	9.11	4.94	7.92	8.99	8.51	9
BANF2	0	0	0	0	0	0	0	0	0	0	0	0	0	0	0	0	0	0	0	0	0	0	0	0	0	0	0	0	0	0	0	0	0	0	0	0	0	0	0	0	0	0	0	0	0	0	0	0	0
BANK1	4.19	5.17	8.43	6.2	1.21	6.59	14	8.02	10.9	2.33	6.44	7.97	7.2	1.77	10.9	11.6	3.51	5.49	3.59	9.76	5.36	5.56	10.8	5.41	8.46	10.6	5.84	16.2	4.39	5.35	12.1	4.36	3.96	9.27	26	10.7	8.46	5.43	7.63	3.17	1.99	10.9	8.26	8.47	7.74	0.873	13.8	0.682	13.8
BANP	9.71	8.48	9.5	15.1	16.8	13.1	4.93	8.12	8.74	7.31	7.92	8.95	8.43	11.2	10.3	8.46	9.37	13.4	10.9	9.83	12.1	10.7	9.59	9.94	11	12.5	13.3	3.47	6.94	7.16	4.79	6.82	8.89	12.1	8.03	6.32	4.32	9.69	11.5	11.4	11.4	5.43	6.43	4.67	7.46	5.24	5.97	8.15	4.81
BAP1	25	21.5	25.2	25	31.3	20.2	17.7	21.8	17.8	19	21.4	22.1	25.8	27.7	21.7	22.3	23.5	30.4	24.6	24.8	27.5	22.4	19.6	20.3	21.2	27.3	26.8	16.8	19.6	21.1	20.7	20.7	24.3	26.2	18.2	18.4	17	23	23	22.9	22.7	17.5	25	18.8	20.2	22.3	20.1	22	19.3
BARD1	0.38	0.395	0.513	0.545	0.242	0.479	0.74	0.493	0.535	0.416	0.397	0.418	0.224	0.163	0.542	0.58	0.27	0.145	0.633	0.502	0.0673	0.465	0.623	0.502	0.604	0.345	0.398	0.726	0.473	0.73	0.764	0.845	0.172	0.521	0.996	0.663	0.822	0.324	0.406	0.812	0.711	1.07	0.647	0.552	0.8	0.608	1.17	0.371	0.593
BARHL1	0	0	0.0118	0	0	0.0101	0.00578	0	0.0129	0	0.00583	0	0	0	0.00748	0	0	0.0142	0.0204	0.00483	0	0	0.00484	0	0.0304	0.0112	0	0	0.00548	0.00819	0.00786	0	0	0	0	0.0152	0.00929	0	0.00761	0	0	0.00426	0.00574	0.00546	0.0141	0	0	0.00832	0.00659
BARHL2	0	0	0	0	0	0	0	0	0	0	0	0	0	0	0	0	0	0	0	0	0	0	0	0	0	0	0	0	0	0	0	0	0	0	0	0	0	0	0	0	0	0	0	0	0	0	0	0	0
BARX1	0.0176	0	0	0	0	0	0	0	0	0	0	0	0	0	0	0.0273	0.011	0	0	0.0124	0	0	0	0	0	0	0	0	0.0212	0	0.0101	0.0131	0	0	0	0	0.012	0.00825	0	0	0	0	0	0	0	0.0206	0	0	0.017
BARX2	0	0	0.00636	0	0.0715	0	0	0	0	0.00864	0.0126	0	0.0122	0.01	0.00808	0.00764	0.0278	0	0.011	0.00522	0.011	0.00635	0.0418	0	0.0164	0	0.0118	0.0103	0.00592	0.0265	0.0254	0.011	0	0.027	0.00966	0.0164	0.0201	0	0.0164	0.0186	0.00954	0.00919	0.0434	0	0	0	0.018	0	0
BASP1	306	172	195	364	604	366	115	160	157	129	64.8	196	174	227	204	140	292	581	76.3	119	312	249	109	164	171	733	578	37.5	100	93.8	66.3	77	125	322	196	83.8	62.4	205	232	463	357	59.1	154	58	170	136	127	124	80.3
BASP1P1	0	0	0	0.0164	0	0	0	0	0	0	0	0	0	0	0	0	0	0.0235	0	0	0.0169	0	0	0	0	0.0372	0	0.00794	0	0	0	0	0	0	0	0	0.00769	0	0	0.0142	0	0	0	0	0	0	0	0	0
BATF	22	30.3	10.2	18	19.7	14.4	19.7	17.9	14.3	15.8	15	17.5	22.6	25.9	14.9	16.5	16	23.7	41.5	15.9	33	11.8	13.5	24	16.7	15.7	10.4	11.3	12	17.6	16	35.4	47.5	27.5	13.4	15	20.3	13.9	18.8	8.77	10.9	16.8	15	18.3	16	24.1	13.1	15.7	25
BATF2	20.3	38.5	13.7	6.66	11.3	1.85	22	7.15	2.46	3.46	3.61	1.91	10.6	4.38	3.42	3.44	6.56	2.77	18.1	4.04	6.11	6.76	1.51	3.62	3.24	1.17	13.2	2.04	11.6	15	14.1	31	38.9	141	30.2	19.9	7.74	15.2	19.4	40.2	28.3	12.7	17.8	11.8	26	24.3	8.59	10.5	26.6
BATF3	1.3	1.53	2.15	0.56	1.31	0.98	3.02	0.924	1.19	1.62	1.98	1.81	3.08	2.4	0.945	0.991	1.34	1.91	4.73	1.13	2.47	2.4	1.37	1.3	0.64	1.64	1.78	0.783	2.36	2.02	0.886	2.24	3.57	1.31	0.783	2.92	1.21	2.22	0.961	2.26	1.07	1.13	2.95	2.85	2.33	1.34	1.32	1.81	0.973
BAX	40.5	49.2	42.2	36.5	56.2	27.2	31.3	38.1	26.1	35.8	39.9	39.6	51.1	61.7	38.6	41.8	43.4	47.2	47.9	38	91.1	37.2	29.2	34.4	30.3	37.2	40.7	29.5	29.8	35.8	41.6	47.8	69.1	52.3	30	29.1	31.6	59.3	41.2	34.3	36.4	33.8	55.3	41.1	29.9	58.5	38.3	43.8	45.7
BAZ1A	26.6	25.7	17.4	34	27.3	44.4	19.2	18.4	23.2	21.9	13.3	15	11	12.7	15.3	11.2	22.7	23.4	13.3	10.8	12.3	24.2	19	26.6	24.9	51.3	45.9	14.3	22.8	16.3	18.9	20.5	23.2	30.3	46.7	19.4	15	13.7	18.3	57.9	44.3	22.5	16.3	17.8	38	25.4	22.8	16	17.5
BAZ1B	6.23	4.38	6.62	5.08	6.37	4.78	7.04	4.34	5.19	6.42	6.51	6.22	5.72	6.17	5.78	6.11	6.45	5.64	5.56	8.58	5.87	7.61	6.1	5.8	6.14	6.37	5.09	8.15	8.88	8.67	9.8	4.75	5.82	4.88	5.96	5.6	6.42	5.58	5.75	6.63	7.79	7.39	7.99	5.68	7.43	6.13	9.38	5.33	6.63
BAZ2A	27.4	20.8	32.5	29.8	45.1	32.2	22.6	21.3	21.6	19.8	18.2	17.8	19.5	17	23.1	17.9	23.9	28	19.4	20.8	17	28.6	18.2	22.4	24.7	37.2	41.1	15.7	21	23.5	22.5	19.3	14.7	33.2	37.5	20.4	16	20.2	26	44.9	40.5	20.1	23.4	17.5	33.5	22.8	24.9	20.3	18
BAZ2B	10.4	8.87	8.49	9.43	8.96	15.4	5.69	8.23	13.5	7.99	4.61	7.3	4.23	3.81	5.98	4.68	9	8.3	3.95	3.72	3.46	11.5	7.76	11.8	9.61	11	20.8	5.86	6.48	6.25	5.94	4.74	4.69	6.91	16	7.12	5.83	4.36	5.8	24.1	26.7	9.98	5.61	5.6	14	7.8	7.22	5.16	3.57
BBC3	14.9	9	13.5	26.9	31.6	13	4.66	10.2	9.93	9.3	7.33	11.9	10.5	13.4	14.6	10.4	10.8	13.1	13.5	8.68	15.9	11.8	10.4	9.33	8.79	17.7	21.2	2.96	8.03	7.57	6.18	9.49	19.5	15.4	9.69	6.71	6.08	10.6	12.8	11.6	18.5	5.61	9.68	7.12	7.47	11.9	6.86	16.2	5.81
BBIP1	10.5	10.4	9.22	10.4	13.5	12.7	10.6	11.6	11.2	12.2	9.6	10.5	9.37	8.04	11	9.64	10.7	10	8.32	9.35	9.9	10.2	9.95	12.7	11	14.6	17	11.5	12.1	8.13	9.17	8.77	12.6	11	13.6	12	9.14	9.32	8.77	14.2	12.9	9.89	7.91	11.9	10.8	8.35	7.88	10.5	9.88
BBOX1	0	0	0	0	0.0402	0	0	0	0	0	0	0	0	0	0	0.00716	0	0	0	0	0	0	0	0	0	0	0	0	0	0	0	0	0	0	0	0	0	0	0	0.0087	0	0	0	0	0	0	0.0113	0	0
BBS1	3.09	1.81	3.57	2.73	2.59	2.23	2.79	2.36	2.66	2.79	2.92	3.02	2.83	2.78	3	3.12	2.99	3.75	3.12	3.93	3.52	2.9	2.9	2.44	2.99	2.92	2.7	2.65	3.02	3.06	2.62	2.17	1.86	2.37	2.33	2.79	2.48	2.7	3.22	2.28	2.36	2.12	3.08	2.55	2.57	1.85	2.66	3.24	2.42
BBS10	1.96	3.02	1.97	4.25	1.46	5.08	3.71	3.5	5.11	3.08	2.7	2.67	2.29	1.44	2.87	3	1.92	1.61	2.23	1.97	1.26	3.57	4.07	3.65	3.49	3.08	4.44	4.33	2.95	2.71	1.92	2.82	1.31	2.63	4.86	3.31	3.97	1.43	1.88	4.72	3.18	3.37	1.77	3.56	2.8	3.53	2.62	2.76	2.17
BBS12	0.668	0.618	0.429	0.397	0.501	0.476	0.645	0.336	0.474	0.44	0.587	0.565	0.572	0.499	0.507	0.539	0.711	0.324	0.549	0.54	0.443	0.516	0.607	0.518	0.402	0.412	0.412	0.613	0.716	0.669	0.559	0.727	0.48	0.465	0.642	0.47	0.637	0.499	0.486	0.545	0.531	0.655	0.53	0.604	0.565	0.737	0.662	0.518	0.758
BBS2	6.76	4.66	7.59	4.2	6.15	6.11	7.51	5.12	7.59	6.35	7.33	6.5	6.3	6.03	7.45	6.65	8.4	5.31	8.02	6.03	6.68	5.83	7.92	4.67	6.23	6	4.75	9.23	9.26	7.03	7.74	4.56	5.32	5.04	6.03	7.13	5.17	7.34	5.03	5.89	7.63	6.85	8.35	6.6	6.49	6.3	5.7	9.03	5.73
BBS4	3.33	2.96	2.65	2.54	1.63	2.86	3.42	3.52	2.78	2.18	2.99	2.74	2.73	2.53	2.56	2.99	2.5	2.39	2.89	2.51	2.54	2.75	3.04	2.79	2.98	2.96	3.78	3.32	3.04	2.75	2.37	2.85	2.81	3.9	2.99	3.48	3.73	2.73	2.55	2.49	2.51	2.81	2.54	3.1	2.46	2.79	2.48	3.2	3.17
BBS5	0.107	0.112	0.103	0.09	0.072	0.146	0.192	0.188	0.238	0.15	0.204	0.193	0.144	0.134	0.158	0.287	0.135	0.0429	0.111	0.175	0.148	0.192	0.263	0.195	0.199	0.102	0.118	0.235	0.262	0.222	0.19	0.179	0.119	0.0905	0.206	0.212	0.21	0.0814	0.221	0.151	0.144	0.152	0.156	0.125	0.205	0.101	0.125	0.221	0.143
BBS7	0.925	1.11	0.648	0.934	0.679	0.992	1.22	0.889	1.02	1.19	1.1	1.02	0.817	0.714	1.01	0.946	0.857	0.563	1.04	0.82	0.46	1.02	1.47	1.09	1.13	0.721	0.927	1.3	1.22	1.32	1.34	1.27	0.973	0.612	1.44	1.3	1.32	0.62	0.762	1.13	1.41	1.33	0.872	1.47	1.3	1.18	1.25	1.09	1.1
BBS9	1.14	0.843	1.33	0.764	1.38	1.1	1.29	1.01	0.973	1.09	1.21	1.14	1.37	1.48	1.24	1.16	1.43	1.38	1.08	1.57	1.27	1.56	1.29	1.24	1.17	1.29	0.972	1.57	1.45	1.35	1.56	0.844	1.21	0.758	1.09	1.05	1.37	1.28	1.35	1.32	1.25	1.28	1.23	1.06	1.28	1.01	1.31	1.36	1.09
BBX	4.08	4.36	3.58	4.32	4.58	4.92	4.69	3.54	4.14	3.86	3.14	2.96	2.71	2.43	3.72	3.3	3.21	3.36	3.48	3.45	1.9	4.18	4.3	3.69	4.56	3.74	5.29	5.02	4.67	4.74	4.37	3.38	2.73	4.09	7.51	4.39	4.04	3.07	3.27	8.51	6.5	5.04	3.3	3.68	6.38	4.82	4.67	3.48	3.68
BCAM	0.869	2.03	0.129	0.304	0.727	0.679	0.0973	0.108	0.206	0.799	0.509	0.211	1.21	0.849	0.131	0.0662	0.466	0.647	0.813	0.0542	0.0957	0.103	0.172	0.0805	0.237	0.0981	0.129	0.0927	0.164	0.424	0.0392	0.376	0.169	0.818	0.14	0.114	0.0348	0.144	0.427	0.0537	0.292	0.0106	0.0609	0.0341	0.207	0.478	0.073	0.208	0.0616
BCAN	0.0258	0.0218	0.0222	0.00468	0.0312	0.00475	0.0381	0.00815	0.0122	0.00377	0.0137	0.0157	0.0213	0.0131	0.0106	0.00667	0.00809	0.00669	0.0144	0.0159	0.0193	0.0166	0.00684	0.00553	0.00477	0	0.0103	0.0136	0.00517	0.0386	0.0222	0.00963	0.0407	0.0353	0.00844	0.0108	0.00657	0.00907	0.00717	0.0122	0.025	0.0201	0.00812	0.0129	0.0299	0.0301	0.0473	0.0118	0.0714
BCAP29	1.96	2.21	1.94	1.22	1.87	1.76	2.36	2.02	1.91	2.65	2.13	2.34	2.23	1.73	2.14	1.98	2.31	1.95	2.23	2.01	1.66	2.01	2.39	2.49	1.76	1.8	1.84	2.73	2.29	2.23	2.23	2.69	1.78	1.59	1.85	2.2	2.31	1.85	1.9	1.92	1.44	2.37	2.1	2.59	2.58	2.33	1.98	2.17	2.22
BCAP31	36.9	34.4	46.5	42.6	67.4	38.4	27.4	27.9	29.1	35.2	30.3	38.2	43.6	52	37.9	35.3	39.2	77	30.8	39.1	85.6	41.2	26.4	31.7	25.6	44.6	54.4	26.7	28	26.9	34	31.8	59	42.8	25.4	23.9	21.3	48.4	47.4	41.2	31.4	23.6	37.5	24.4	24.2	33.3	27.6	25.4	26.4
BCAR1	0	0	0.025	0.0176	0	0.0143	0.00409	0	0.016	0.00283	0.00413	0.00235	0.012	0	0.00529	0.133	0.0182	0.00502	0.0324	0.00342	0.0217	0.00208	0.0137	0.00622	0	0.00398	0.0077	0.0017	0.00194	0.0347	0.00834	0.0145	0	0.0177	0.019	0	0.00493	0.00908	0	0.0122	0.05	0.0301	0.0102	0.00387	0.00999	0	0.0118	0.0206	0.0117
BCAR3	0.207	0.337	0.33	0.16	0.113	0.139	0.31	0.189	0.111	0.179	0.105	0.183	0.199	0.132	0.266	0.266	0.322	0.0674	0.126	0.33	0.238	0.162	0.168	0.136	0.216	0.0854	0.0672	0.26	0.221	0.299	0.455	0.267	0.17	0.219	0.472	0.232	0.353	0.149	0.21	0.0899	0.281	0.39	0.466	0.21	0.288	0.0683	0.487	0.201	0.541
BCAR4	0	0	0.00855	0.0144	0.0192	0	0.00839	0.0125	0.0188	0.0116	0.00847	0.0193	0	0	0	0.0103	0.0249	0.0206	0.0148	0.014	0.0445	0	0.00702	0	0.00735	0.0326	0.0316	0.0209	0.00796	0	0	0.0148	0	0	0.026	0.0111	0	0.0279	0	0.0125	0	0.0124	0	0	0.0205	0.0232	0.00808	0	0.00956
BCAS1	0.15	0.203	0.12	0.229	0.225	0.249	0.206	0.223	0.362	0.136	0.0896	0.31	0.0994	0.102	0.144	0.14	0.099	0.0935	0.129	0.202	0.213	0.216	0.162	0.302	0.269	0.0555	0.269	0.0658	0.196	0.108	0.289	0.174	0.0948	0.199	0.383	0.155	0.155	0.176	0.251	0.326	0.272	0.334	0.17	0.132	0.143	0.101	0.165	0.0639	0.112
BCAS2	7.71	9.69	6.88	6.86	6.84	6.89	8.61	11.1	7.76	7.9	10.2	9.78	9.17	7.11	8.74	10.9	9.34	8.18	6.57	7.09	6.93	7.7	7.81	7.5	7.17	7.87	7.81	9.42	9.08	7.21	8.94	11.4	10.5	8.71	8.2	7.93	9.14	8.2	9.4	7.33	7.67	8.28	6.85	9.99	7.01	7.65	7.25	9.69	10.1
BCAS3	6.6	3.76	5.73	4.38	7.32	3.84	3.19	2.38	3.17	3.47	3.59	4.18	5.25	5.74	4.11	3.91	5.92	8.11	3.43	5.37	5.85	6.16	2.93	3.55	3.1	4.42	6.67	3.33	3.86	3.85	4.23	2.55	5.12	6.05	3.99	2.61	2.68	4.71	5.49	6.94	5.97	3.22	5.52	3.08	3.41	4.42	4.12	2.82	3.3
BCAS4	3.69	2.85	3.8	2.96	2.17	3.41	5.12	4.13	3.46	2.45	5.35	5.17	4.47	4.49	4.42	8.12	2.83	2.02	3.36	5.38	3.98	2.4	5.07	3.12	6.43	4.52	2.43	6.3	4.57	4.04	5.23	4.65	8.79	6.17	4.75	6.63	6.11	4.17	5.76	1.49	2.68	4.38	3.9	4.87	2.99	2.71	4.44	5.16	6.61
BCAT1	0.446	0.749	0.778	1.42	0.586	1.51	0.689	0.891	0.638	0.394	0.302	0.441	0.262	0.346	0.279	0.222	0.371	3.2	0.536	0.347	0.339	0.5	0.322	1.92	0.169	2.95	1.47	0.445	0.504	0.389	0.268	0.556	0.511	0.517	0.529	0.443	0.786	0.182	0.329	1.41	1.23	0.476	0.55	0.604	0.322	1.08	1.51	0.186	0.474
BCAT2	3.77	2.94	5.13	3.26	3.2	2.97	4.28	3.61	3.54	4.41	5.5	5.37	6.3	6.64	5.02	5.77	4.65	4.58	5.4	5.03	7.25	3.41	4.41	3.33	3.72	3	2.53	4.43	4.28	4.95	4.82	4.58	6.65	3.51	3.08	4.76	4.51	5.51	5.28	2.53	3.25	3.87	4.82	4.18	2.68	4.4	4.91	4.91	4.91
BCCIP	4.83	6.51	5.02	3.42	3.49	4.53	6.27	5.94	4.9	6.13	7.13	6.36	6.77	6.7	6.36	6.51	6.77	4.21	4.93	6.21	5.88	5.05	5.67	4.61	5.35	4.38	3.47	6.94	6.18	4.79	7.01	7.55	7.5	4.48	4.38	5.89	7.06	6.89	7.45	3.84	3.96	6.68	5.17	7.46	4.93	5.75	5.95	7.64	7.31
BCDIN3D	1.71	2.1	2.01	1.69	1.59	2.3	2.65	2.27	2.23	1.82	2.27	1.71	1.89	2.01	2.25	2.1	2.06	1.51	2.05	2.05	1.75	1.99	2.57	2	2.03	1.93	1.98	2.7	2.23	1.83	2.03	1.54	1.71	1.93	2.03	1.88	2.18	1.91	1.83	1.7	1.96	2.15	1.96	2.11	1.6	2.31	1.95	2.22	2.32
BCHE	0	0	0	0	0	0	0	0.00673	0	0	0	0	0	0	0	0	0	0	0	0	0	0	0	0	0	0	0	0	0	0	0	0	0	0	0	0	0	0	0	0	0	0	0	0	0	0	0	0	0
BCKDHA	21.4	15.5	23.6	19.5	21.6	16.1	12.6	15.8	14.2	19.8	16.1	17.7	23.7	29.4	18.1	18.3	21.6	23.6	20.3	26.6	39.6	28	14.5	16.6	14.1	15.5	16.7	13.3	18.2	18.6	17.8	17.3	36.7	21	11.2	11.1	18.3	24.5	18.8	21.6	16.2	15.1	22.9	20.2	13.7	26	17.7	15	16.9
BCKDHB	0.716	0.801	1.08	0.97	0.619	1.28	1.44	1.45	1.27	1.02	1.41	1.28	0.878	0.933	1.67	1.4	1.02	0.598	1.03	1.45	0.893	1.01	1.64	1.13	1.37	0.964	0.739	2.15	1.56	1.28	1.16	1.12	0.945	0.751	1.01	1.34	1.6	0.873	1.01	1.02	0.986	1.39	1.01	1.17	1.1	0.977	1.36	1.53	1.01
BCKDK	24.3	17.9	27.8	20.7	31.5	20.3	13	22.7	17.4	20.4	13.6	22.4	25.3	35.7	21.4	17.7	23.9	35	21.3	21	41.4	25.6	12.9	21.2	14	29.6	37.2	9.81	13.8	14.5	14.7	14.5	31.2	28.1	13	12.2	11.7	27	18	28.9	19.2	15.8	22.5	13.3	14.7	20.8	17.2	14.6	14.6
BCL10	7.79	7.43	6.62	9.12	12.5	9.94	6.72	9.33	6.88	6.95	5.13	8	5.97	5.41	6.94	6.37	8.1	9.76	4.89	5.95	6.03	8.48	6.54	9	7.29	10.2	14.8	5.78	6.83	5.73	6.42	6.6	6.25	9.73	8.37	6.66	5.27	6.11	7.66	12.5	11.6	6.43	6.45	6.78	8.18	6.86	6.26	6.85	6.35
BCL11A	1.2	0.68	1.17	0.802	0.618	0.875	1.34	0.808	1.27	1.19	1.28	1.19	1.26	0.645	1.38	1.61	0.895	1.19	0.6	1.4	1.46	0.833	1.62	0.563	0.845	1.12	0.801	1.71	1.29	1.06	1.33	0.657	1.09	1.01	2.03	1.3	1.11	1.29	1.14	0.725	0.652	1.04	1.08	1.13	1	0.665	1.57	0.467	1.41
BCL11B	5.06	3.17	5.39	4.57	5.13	5.09	6.96	6.05	6.63	6.39	8.36	6.94	5.78	7.71	7.41	8.2	6.91	2.71	5.86	9.73	5.64	5.85	8.23	5.17	7.72	3.75	3.29	11.2	10.1	8.4	8.48	5.69	5.18	3.72	4.49	8.73	7.35	6.49	7.03	4.75	5.7	7.1	6.72	6.21	5.81	5.12	5.32	8.75	5.47
BCL2	5.02	4.68	6.15	5.96	4.19	4.95	6.52	6.83	6.69	8.76	8.25	7.88	5.44	8.88	6.62	8.13	7.61	3.57	4.22	10.1	3.5	8.28	8.75	4.88	8.39	4.41	4.73	15.3	9.75	6.09	10.6	4.29	5.84	2.73	6.89	6.62	7.49	5.86	6.11	6.24	8.19	9.73	5.99	6.32	7.67	6.29	7.75	7.95	4.6
BCL2A1	32.8	54.4	4.93	43.7	29.6	44.3	18.7	21.3	33.4	19.7	12.8	22.6	7.99	20	6.93	6.93	19.5	34.7	25	4.75	23.5	22.6	18.4	58.9	29	62.1	45.5	11.2	12.1	10.6	8.45	22.2	59.1	59.8	73.4	30.2	20.8	17.2	6.12	28.7	23.9	23.4	6.39	44.7	36.6	28.1	13.2	8.42	32.2
BCL2L1	260	713	29.7	117	154	157	32.7	39.7	28.8	82.1	76.1	59.9	260	194	65.3	51.6	104	59.4	169	27.8	76.9	44.1	38.5	32.2	48.9	101	61.5	43.6	34	80.6	128	191	151	149	119	55.3	37	37.8	78.5	35.8	50	15.1	29	30.8	131	144	92.2	57.6	62.5
BCL2L10	0	0.0664	0	0.0214	0.0285	0.065	0.0745	0.0186	0.0556	0.0344	0.0251	0.0286	0	0	0.0161	0.0304	0.0185	0	0	0.0312	0	0.0506	0.104	0.0126	0	0	0.0234	0.0309	0.0118	0	0.101	0	0.0531	0	0	0.0491	0.02	0.0414	0	0	0	0.0275	0.0247	0.0587	0.0455	0	0.0599	0.0537	0.0425
BCL2L11	9.18	7.85	11.9	10.7	13.9	13.5	6.15	6.48	6.41	6.94	5.52	8.25	8.11	6.73	7.08	4.62	11.4	10.7	4.58	7.46	10.5	9.06	7.27	7.14	8.96	18	12.4	5.62	6.73	7.6	6.89	8.92	6.93	9.66	10.9	4.8	6.54	7.27	8.87	18.8	14.6	7.2	6.3	6.89	11.7	13.2	13.8	7.4	7.53
BCL2L12	9.65	7.96	8.84	7.79	8.28	6.9	8.95	7.78	9.35	7.28	9.69	8.68	10.5	9.35	8.98	11	7.32	8.13	12	11	9.27	7.62	7.46	7.87	7.51	8.08	8	6.24	7.42	9.44	7.99	10.4	9.16	9.83	6.53	9.85	7.74	10.7	10.9	6.86	8.24	7.03	10.6	8.08	6.42	8.03	8.4	9.92	9.02
BCL2L13	9.06	10.6	8.74	7.24	9.28	8.94	6.54	6.5	6.72	9.15	7.47	7.86	9.14	7.8	7.93	7.27	9.4	9.14	6.89	8.38	10.1	9.06	7.26	5.39	5.33	7.84	7.79	8.87	7.99	7.83	8.86	7.62	8.16	7.77	6.69	7.13	8.16	7.24	6.7	9.14	9	6.84	7.21	8.45	7.84	9.12	6.92	7.6	6.89
BCL2L14	0.0933	0.752	0.0201	0.0764	0.0566	0.0258	0.0888	0.221	0.0221	0.157	0.0349	0.0454	0.0967	0.15	0.0128	0.0605	0.169	0.0121	0.0783	0.0578	0.0699	0.0452	0.0578	0.0451	0.0432	0.0096	0.0837	0.0778	0.126	0.147	0.429	0.393	0.927	0.117	0.26	0.26	0.266	0.17	0.318	0.235	0.181	0.502	0.466	0.425	0.35	0.314	0.228	0.341	0.957
BCL2L15	0.403	1.23	0.269	0.476	0.513	0.367	0.341	0.384	0.67	1.02	0.362	0.242	0.252	0.384	0.267	0.307	0.27	1.04	0.254	0.326	0.22	0.219	0.295	0.369	0.25	0.216	0.347	0.428	0.336	0.301	0.262	0.427	0.454	0.239	0.416	0.321	0.577	0.241	0.429	0.261	0.207	0.524	0.282	0.373	0.349	0.245	0.252	0.683	0.503
BCL2L2	2.12	2.23	2.21	1.85	2.3	2	2.47	2.29	2.33	3.2	2.25	2.04	2.02	1.75	2.11	2.13	2.1	1.89	2.69	1.95	2	2.31	2.11	2.38	1.82	2.15	2.07	2.32	2.31	2.49	2.04	2.44	1.77	1.78	2.02	2.02	2.86	1.91	1.75	2.61	2.15	2.89	2.88	2.53	2.55	2.34	3.06	2.28	2.25
BCL2L2-PABPN1	29.9	29.1	25.2	29.6	34.5	26.1	27.2	25.9	27.2	28.6	26.8	25.9	30.4	33.7	27.3	27.7	29	33.2	31	30.5	54.4	26.7	23.4	31	24.4	30.1	31.9	25.4	24.3	26.9	27.8	26.4	44.9	34.6	25.8	24.8	22.1	37.2	31.8	26.8	29.2	25.9	31.3	29.3	23.8	27.8	25.9	27.9	29.3
BCL3	112	79.4	54.9	62.5	125	86.4	37	35.7	30.2	53.6	32	50	61.7	74.7	60.9	48.9	68.3	130	46.4	53	70.8	51.4	37.4	44.8	62.4	102	92.1	12.7	40	42.3	34.4	55.9	94.1	103	81.6	40.6	30.2	69.8	104	56	109	40	50.8	33.5	64.1	44	32.3	50.4	48.1
BCL6	160	255	143	361	344	622	224	165	204	173	98.9	108	88.4	76.3	135	102	211	363	105	69.1	116	206	136	243	247	485	471	43.2	78.9	80.8	62.7	107	72.3	322	385	73.8	111	153	206	457	307	90.5	95.5	79.8	260	173	155	104	86.3
BCL6B	0.0517	0.0752	0.0606	0.0107	0.0573	0.0491	0.0594	0.0234	0.049	0.0563	0.0316	0.0324	0.0429	0.0551	0.0567	0.0575	0.0465	0.0538	0.0882	0.0654	0.0387	0.0286	0.0314	0.0476	0.052	0.0365	0.0825	0.0493	0.0326	0.0709	0.051	0.0829	0.0467	0.0878	0.0678	0.0495	0.0553	0.0521	0.0576	0.0605	0.0287	0.0461	0.0745	0.0296	0.0726	0.0389	0.0814	0.072	0.0784
BCL7A	1.07	0.809	2.21	1.12	0.354	0.932	2.36	0.949	1.45	0.686	1.81	1.61	1.3	0.68	2.32	1.83	0.789	1.01	0.455	1.92	1.17	1.06	2.13	0.924	1.73	0.71	0.682	3.97	1.12	1.46	2.05	1.09	0.754	1.8	1.9	2.06	1.46	1.13	0.953	0.393	0.685	1.79	1.75	1.55	1.51	0.332	3.47	0.671	2.16
BCL7B	18.6	16.8	15.2	16.1	18.3	14.1	16.1	18.1	14	15.9	17.2	19	19.6	21.2	17.6	19.5	20.3	18.8	21.6	18.7	26.3	17	16.4	15.5	14.3	15.3	16.8	16.9	16.4	17.8	17.7	20.8	26.4	19.5	14.3	18.7	17.1	20.7	19.6	15.2	16.5	16.7	20	19.5	14.7	18.5	16	20.1	18.1
BCL7C	18.2	15.1	12.2	15.9	15.1	11.1	15.3	17.1	13.3	16.5	21	21.2	22.7	28.5	17.7	22.3	16.2	16.6	35	20.4	45.5	14.3	18.2	16.7	17.5	13	9.13	15.1	17.2	18.9	13.4	22	40.9	15.4	9.41	19.4	18.2	20.6	16.5	8.9	9.9	12.7	16.7	20.8	13.4	21.5	13.1	19.6	20.9
BCL9	1.22	0.798	1.66	1.24	1.44	1.46	1.23	0.974	1.09	1.2	1.5	1.52	1.19	1.51	1.77	1.58	1.52	1.89	0.86	2.54	1.33	1.51	1.68	0.924	1.61	1.76	1.5	1.58	2.17	1.26	1.89	0.953	1	0.925	1.14	1.34	1.37	1.5	1.28	1.55	1.66	1.43	1.61	1.25	1.19	0.893	1.42	1.99	0.973
BCL9L	11.5	6.24	12.8	9.28	10.3	7.52	11.6	9.91	9.83	8.54	15.9	11.4	11.9	12.3	15	14.1	9.85	4.92	24.3	18.9	6.89	10.1	12.4	9.91	13.9	6.86	5.21	12.2	14.6	19.3	14	10.1	5.96	8.03	7.74	13	13.5	10.3	12.7	7.46	9.49	8.97	12.9	9.97	12.1	8.83	10	15.7	11.9
BCLAF1	7.05	6.33	7.8	8.64	8.34	11	8.52	8.39	9.99	9.59	7.7	7.75	5.02	6.27	8.02	7.05	8.11	6.94	6.13	6.52	3.68	8.75	8.67	9.63	8.83	11.8	13.6	9.09	9.07	7.41	7.74	6.69	6.12	6.79	10.6	8.94	6.71	5.87	5.66	9.79	7.69	8.22	6.08	8.25	8.68	6.12	7.38	6.3	5.88
BCMO1	0	0	0	0	0	0	0.00908	0.00679	0	0	0	0	0	0	0.00588	0	0	0	0.008	0	0.00804	0	0	0	0.00398	0.00883	0	0	0	0	0	0	0	0	0.00704	0	0	0	0	0	0	0	0.00451	0	0	0	0	0.0131	0
BCO2	0.234	0.323	0.198	0.233	0.16	0.282	0.194	0.263	0.287	0.193	0.311	0.114	0.33	0.259	0.252	0.18	0.169	0.297	0.207	0.156	0.234	0.269	0.2	0.354	0.19	0.307	0.332	0.201	0.257	0.312	0.264	0.331	0.211	0.38	0.409	0.256	0.153	0.415	0.246	0.29	0.258	0.386	0.313	0.229	0.26	0.233	0.219	0.232	0.28
BCOR	3.34	2.51	3.85	2.38	3.8	2.51	3.14	2.01	2.33	2.98	2.73	2.64	2.56	2.13	3.15	2.83	2.9	2.18	3.2	3.68	2.39	3.34	2.67	2.08	3.18	2.32	2.02	3.22	4.05	4.42	3.85	2.18	2.24	2.4	3.99	2.58	2.9	2.32	3.36	3.68	4.43	3.28	3.47	2.46	3.63	2.63	3.87	2.36	2.55
BCORL1	2.39	2.17	2.57	2.94	7.43	3.53	1.37	1.64	1.76	2.22	1.5	2.16	2.08	2.28	1.87	1.87	2.9	5.53	1.46	1.97	3.27	3.28	1.34	2.09	2.38	3.1	3.92	1.1	1.84	1.74	1.43	1.09	1.37	2.42	1.65	1.23	1.08	2.14	2.56	3.55	3.38	1.41	2.15	0.969	2.67	1.58	1.64	1.48	0.894
BCORP1	0	0	0	0	0.379	0	0	0	0	0	0	0	0	0	0	0	0	0	0	0	0	0	0	0	0	0	0	0	0	0	0	0	0	0	0	0	0	0	0	0	0	0	0	0	0	0	0	0	0
BCR	5.51	4.12	7.99	7.84	9.38	5.88	5.08	5.37	4.91	4.95	6.22	4.8	7.31	8.52	5.66	6.09	6.84	7.61	9.37	6.67	5.81	6.11	4.97	4.82	5.9	6.86	6.29	5.14	5.71	7.7	7.69	5.38	4.71	5.68	4.84	3.9	5.14	5.2	6.62	6.6	5.71	3.77	6.48	3.63	5.53	4.74	6.47	5.09	5.23
BCRP2	0	0	0	0	0	0	0	0	0	0	0	0	0	0	0.00611	0	0	0	0	0	0.00836	0	0	0.00479	0.00827	0	0	0.00392	0	0	0	0	0	0.0102	0	0	0	0.00524	0.0124	0	0	0	0	0	0	0	0.0091	0	0.00538
BCRP3	0.0366	0.0827	0.0473	0.106	0.0177	0.027	0.0464	0.104	0.121	0.0321	0.0937	0.0534	0.0455	0.0744	0.02	0.0284	0.0804	0.114	0.0818	0.0647	0.0684	0.126	0.104	0.0785	0.0813	0.0752	0.0729	0.0706	0.0514	0.0219	0.0315	0.0957	0.0495	0.0501	0.024	0.0306	0.0311	0.0515	0.0407	0.0922	0.0237	0.0627	0.0384	0.0293	0.0283	0.0748	0.0447	0.1	0.0705
BCS1L	5.22	4.92	5.43	4.63	4.44	4.62	6.53	5.89	6.09	5.34	7.79	5.55	7.23	7.19	6.83	7.68	4.41	5.5	7.76	7.6	6.35	4.55	5.64	5.31	5.61	5.63	3.74	6.36	5.61	5.64	5.2	4.97	6.64	4.49	4.61	6.23	4.95	7.86	6.63	3.02	4.17	5.73	6.03	6.31	3.98	4.9	5.42	7.37	6.71
BCYRN1	0	0	0	0	0	0	0	0	0	0	0	0	0	0	0	0	0	0	0	0	0	0	0	0	0	0	0	0	0	0	0	0	0.118	0	0	0	0	0	0	0	0	0	0	0	0	0	0	0	0
[truncated: 24,794 more rows]
[truncated: 68 more columns]

## Sheet: clinical information
ID	Title	anti-ro	ism
GSM1863633	SLE	high	ISM_high
GSM1863634	SLE	high	ISM_high
GSM1863635	SLE	high	ISM_high
GSM1863636	SLE	high	ISM_low
GSM1863637	SLE	med	ISM_low
[truncated: 112 more rows]
