# Supplementary material for: Exploration of Potential Integrated Models of N6-Methyladenosine Immunity in Systemic Lupus Erythematosus by Bioinformatic Analyses
Source: Front Immunol. 2022 Feb 7;12:752736. doi: 10.3389/fimmu.2021.752736 (PMC8859446; doi:10.3389/fimmu.2021.752736)
Supplement: Supplementary Table 7 — Datas of the gene expression of GSE50772. [file Table_7.xlsx]

## Sheet: Sheet1
Tag	GSM1228860	GSM1228861	GSM1228862	GSM1228866	GSM1228867	GSM1228868	GSM1228869	GSM1228870	GSM1228871	GSM1228872	GSM1228876	GSM1228878	GSM1228879	GSM1228880	GSM1228881	GSM1228882	GSM1228915	GSM1228916	GSM1228917	GSM1228918	GSM1228863	GSM1228864	GSM1228865	GSM1228873	GSM1228874	GSM1228875	GSM1228877	GSM1228883	GSM1228884	GSM1228885	GSM1228886	GSM1228887	GSM1228888	GSM1228889	GSM1228890	GSM1228891	GSM1228892	GSM1228893	GSM1228894	GSM1228895	GSM1228896	GSM1228897	GSM1228898	GSM1228899	GSM1228900	GSM1228901	GSM1228902	GSM1228903	GSM1228904
A1BG	275.328	266.792	245.202	132.533	203.056	268.86	220.26	297.956	230.514	219.939	133.508	237.798	197.358	140.488	111.442	107.804	158.027	270.904	126.759	123.25	232.49	169.287	186.198	128.089	206.298	197.951	180.669	166.95	252.975	410.578	363.827	195.374	327.851	253.713	272.976	344.895	185.974	156.873	301.035	258.216	172.556	219.747	391.03	338.561	222.174	378.732	102.308	271.439	385.309
A1BG-AS1	136.204	108.207	94.8286	90.7603	113.94	188.818	173.363	60.1207	153.357	197.759	208.061	123.164	160.981	58.4091	116.727	102.303	33.8529	34.9293	168.575	154.52	30.1128	122.534	62.3915	85.1604	168.762	204.443	124.323	141.436	65.8545	96.2032	140.832	117.861	261.743	169.154	237.523	207.11	135.494	49.4532	173.207	244.713	180.35	136.243	148.18	129.045	216.078	237.483	75.737	167.681	59.1937
A1CF	160.185	232.202	164.258	195.06	146.048	173.173	186.958	143.068	212.168	160.271	149.083	157.466	264.979	142.552	253.141	250.888	236.69	245.078	215.693	132.444	203.002	181.595	213.309	163.951	171.08	190.759	186.024	199.871	163.539	333.909	213.472	217.95	187.545	157.514	153.693	177.096	81.0987	25.7381	132.58	241.127	212.661	246.536	223.564	234.245	169.83	173.921	219.184	116.913	189.699
A2M	110.974	208.253	100.886	84.771	143.846	127.374	151.295	131.283	117.997	140.78	117.55	109.087	195.57	137.953	152.431	166.841	169.957	170.244	95.0665	132.26	141.323	124.485	197.546	96.3535	103.923	109.587	96.0624	130.311	137.615	85.0525	89.8742	120.232	158.889	102.861	152.187	113.17	88.1458	167.485	148.529	227.732	151.025	97.1836	139.608	187.864	173.962	177.967	209.528	152.294	166.108
A2M-AS1	1100.45	413.707	664.101	930.478	672.288	555.396	320.437	1055.87	623.262	697.237	496.632	203.421	909.716	1030.05	283.742	530.753	458.986	872.516	604.232	593.211	708.59	203.689	174.463	162.508	142.516	165.072	316.489	268.981	171.592	127.897	168.859	97.4188	182.855	178.257	296.213	230.855	278.369	539.186	216.486	346.157	160.685	248.793	309.076	120.67	332.273	224.564	433.831	280.45	259.444
A2ML1	90.7447	175.712	76.8662	63.5968	52.6302	58.0136	77.5081	59.5987	98.9804	116.567	76.7019	109.925	117.472	62.8545	130.084	134.532	130.23	185.399	104.137	121.169	104.56	28.8114	114.55	111.165	49.5278	96.0157	130.816	152.721	113.149	78.8715	57.3892	80.6011	57.5045	98.2553	108.803	37.5229	45.3128	94.3456	93.122	108.222	87.1839	93.3891	110.969	14.5089	143.177	89.4845	68.1736	76.5911	87.5641
A2MP1	141.814	127.993	123.103	158.526	138.954	149.52	159.836	84.4003	200.909	175.108	250.97	144.204	126.954	180.677	182.296	204.478	225.899	130.867	83.5933	217.465	106.813	163.833	121.193	203.819	92.7594	56.2962	109.774	212.145	141.218	133.761	157.457	152.986	90.2373	91.6844	79.0207	75.1753	125.732	225.426	127.995	198.882	149.516	162.17	94.6077	146.256	142.301	116.586	152.033	69.2408	66.2941
A4GALT	32.6767	45.4774	27.7444	51.9512	25.5784	27.2458	61.4217	29.4049	25.1025	28.814	32.7135	26.9323	52.5494	36.4223	27.8688	41.2148	48.6439	54.649	29.1575	59.729	71.5141	80.732	36.7235	54.4466	16.7319	20.0722	58.0392	74.8659	75.7334	81.5949	47.792	33.2881	39.5738	17.7873	168.939	31.4059	19.5128	25.3962	29.6399	45.6412	62.3529	74.0272	66.2072	58.2397	130.158	55.1728	46.5283	69.9013	54.8358
A4GNT	136.065	115.756	150.007	83.838	183.933	139.22	187.954	90.197	166.99	110.352	155.641	151.226	170.749	133.29	175.55	54.2524	60.7147	193.92	214.63	211.773	70.6968	174.927	51.4285	82.0919	88.6438	70.2944	86.9386	153.656	139.489	123.975	183.587	189.984	108.237	36.6605	87.6895	104.786	60.2907	87.857	137.3	57.4213	50.8078	134.347	81.8232	106.582	61.3287	114.418	135.958	45.029	151.12
AA06	121.99	109.514	92.4129	111.554	100.442	61.3597	122.508	100.781	81.1424	121.137	179.067	194.491	147.36	150.469	241.788	194.629	118.612	235.145	132.273	178.284	113.936	107.467	120.574	107.719	146.007	140.71	105.027	214.774	152.625	121.371	169.937	159.833	162.888	198.539	218.14	190.002	140.388	140.948	285.042	156.29	192.856	88.2871	86.1414	154.71	130.028	97.3658	163.3	182.004	165.377
AAAS	331.558	306.989	442.96	291.757	268.707	330.555	309.591	421.041	326.413	276.8	328.036	422.366	333.255	251.739	275.898	175.797	280.268	190.02	246.875	288.64	199.771	200.448	204.01	295.191	406.198	309.968	385.586	302.637	400.357	382.829	400.086	312.819	518.044	425.606	319.239	425.298	225.606	264.718	234.675	201.723	548.287	374.01	318.141	462.432	527.943	378.688	354.277	327.374	552.342
AACS	488.141	452.513	499.89	663.297	494.723	518.031	598.771	446.235	463.727	465.371	628.358	864.342	776.89	652.584	674.323	761.809	612.708	685.729	648.36	782.939	514.931	311.969	681.191	582.089	376.73	486.549	787.108	667.482	593.124	515.212	653.955	554.175	423.965	546.057	503.527	494.906	435.264	553.806	489.999	489.001	733.982	425.124	501.218	475.772	434.353	701.129	660.747	505.913	720.151
AACSP1	7.28604	45.4469	32.302	41.0475	5.03427	5.5418	14.0437	64.6702	12.2258	42.3476	34.4997	69.3909	41.3824	80.6755	60.5657	18.2038	6.61832	28.1318	23.4785	48.6825	36.5751	36.1479	71.9401	35.1769	9.88703	29.9624	5.97974	74.5622	20.8756	32.5059	7.99347	3.43827	24.9404	14.1994	32.9049	37.7291	9.63785	14.2801	20.8475	16.1674	10.5796	67.0068	38.3776	101.014	48.1881	46.6504	37.6125	15.1052	41.1133
AADAC	12.0027	59.7645	11.2279	17.3709	42.0591	13.9782	18.8487	7.60039	16.0548	37.2043	6.76982	25.5459	25.7369	8.91492	11.0278	24.3463	12.0651	69.0024	21.7779	17.349	8.01706	75.854	88.1603	18.5073	13.1819	10.8751	7.56828	26.8512	14.4111	14.1356	7.29689	10.5628	57.0045	12.8502	10.2005	63.2455	29.8011	16.1016	56.7407	8.72023	52.0701	42.7499	110.964	60.7783	46.4258	95.3721	10.3998	19.1679	18.5706
AADACL2	19.7192	14.7444	18.8537	12.5647	35.4839	65.1799	31.2673	41.0997	26.3506	13.8051	31.8033	2.75641	23.5145	8.77517	23.7906	36.2555	37.2738	38.5432	31.6906	31.4057	20.2308	6.29439	36.2193	47.5265	39.0657	36.4565	30.7142	6.43046	31.1556	13.8621	14.6079	29.6909	7.11209	32.2435	10.0613	29.9979	45.4969	13.4659	45.03	15.265	24.8455	26.6077	2.62024	20.4725	34.1553	5.60459	42.9381	27.7505	35.5467
AADACP1	6.6595	63.2252	2.98967	10.9281	6.22606	16.7507	5.76614	8.16367	3.51241	29.1085	8.71527	69.6996	7.43119	13.1531	3.56889	26.9877	44.5408	26.7416	4.04245	7.32402	55.5085	7.6928	9.25952	11.6021	3.65157	8.8433	6.98264	38.3419	2.93954	2.99982	6.12251	8.08959	7.2203	35.8	9.50216	6.82611	5.31218	40.156	2.91625	6.49387	7.75503	38.9826	3.94105	50.7315	6.41399	4.48796	5.25553	2.38471	5.83372
AADAT	44.1111	51.9407	88.2691	40.8352	13.1701	12.9675	16.4341	14.6118	27.105	32.5924	35.9079	17.8521	28.8365	34.8181	23.4249	15.8142	16.0928	22.8872	89.4462	19.3436	27.1313	18.2131	136.254	61.1623	21.3295	70.1516	41.2315	16.3158	66.3674	23.1479	53.9172	17.3963	69.1653	108.959	51.3574	16.9654	53.044	38.974	80.5223	138.536	31.1645	18.1012	2.68696	31.4379	136.982	88.4552	68.8693	61.2939	61.1317
AAED1	597.109	549.887	570.503	538.802	690.968	569.894	535.879	539.443	495.713	943.265	633.898	885.592	542.634	631.829	516.553	550.416	691.553	498.2	544.678	788.175	588.444	495.285	911.058	638.597	553.226	624.47	886.256	677.198	616.974	601.34	800.015	671.355	730.379	1232.87	631.773	815.419	723.772	675.072	526.019	675.997	829.639	725.775	717.455	694.342	560.42	928.933	670.483	642.748	421.834
AAGAB	870.706	814.26	691.408	787.837	595.178	572.777	778.607	673.258	790.79	707.09	835.727	1111.97	892.867	598.641	685.552	771.431	740.405	644.688	809.042	857.418	670.511	605.923	636.73	814.599	718.912	485.138	793.929	901.823	700.557	959.551	980.726	737.732	520.178	811.85	707.742	823.535	813.671	596.318	674.342	784.896	650.775	748.969	615.125	840.759	665.466	708.934	769.284	664.92	622.751
AAK1	4421.68	2797.05	6014.86	4966.35	5731.85	4204.78	4908.3	3895.13	3605.23	2798.02	3240.73	1471.35	3651.07	2684	3914.33	4182.09	3112.14	3978.01	3711.87	4022.18	3633.07	3602.32	2854.88	3186.45	3093.29	3806.28	4400.92	2601.54	2856.62	3126.28	2804.91	2153.82	1161.51	1948.64	2130.36	2541.76	1928.89	2704.34	1927.83	3054.85	1929.01	1723.02	1575.02	2093.13	3053.85	1857.3	1971.14	1553.19	2834.66
AAMDC	278.352	229.233	201.246	159.796	234.225	189.831	234.774	182.978	224.456	145.143	135.187	217.732	182.245	144.486	223.152	250.199	172.451	330.537	298.636	181.628	172.51	154.647	319.017	303.252	298.426	226.321	274.141	260.237	294.343	260.24	268.092	289.079	367.945	235.779	321.544	360.353	317.689	301.464	240.716	404.255	224.332	410.94	380.089	259.871	251.198	342.071	249.969	402.759	339.208
AAMP	1124.95	1092.34	1109.94	1062.44	912.568	1218.76	1211.61	1182.6	1049.85	1188.65	1123.7	1382.07	1180.04	940.072	937.18	1141.63	1077.66	985.047	1072.39	1163.6	1149.51	731.523	1012.64	1060.28	1167.31	888.005	1032.98	1367.16	1236.83	1636.33	1544.9	902.259	1631.14	1578.58	1253.64	1199.39	979.273	897.723	1360.55	1216.35	1444.05	1419.92	1463.94	1112.54	1242.74	1912.73	1353.99	1438.88	1616.16
AANAT	3.88502	5.86068	9.4212	16.5716	12.7282	9.24762	3.59553	5.56066	37.8788	10.0021	16.118	44.8576	5.39567	6.89688	5.3536	4.64247	5.06591	38.2985	5.36278	4.17078	4.84187	8.19502	5.0004	4.27196	8.2404	6.98807	11.3638	8.00962	5.28128	5.75467	11.439	3.51298	12.2501	19.6981	3.78761	7.41378	4.31262	13.558	6.83803	15.9004	18.286	10.8162	10.6454	9.32406	17.9464	5.60337	9.20343	8.072	2.98293
AAR2	768.643	868.019	902.582	899.464	715.134	1037.33	951.83	806.118	824.676	845.19	678.484	862.514	838.634	805.047	658.951	828.073	758.907	834.566	781.491	723.237	886.255	757.199	951.919	971.585	864.178	961.941	658.8	900.197	1025.19	1020.33	1036.52	881.931	1246.06	1100.03	976.832	989.868	765	1067.93	945.695	1260.35	946.984	894.084	1195.57	1067.12	1262.39	1182.54	1213.18	813.048	1255.75
AARS	1078.2	1330.1	1441.79	1237.15	1513.29	1323.76	1550.9	1183.8	1428.82	1244.79	1213.38	1226.08	1239.19	1164.66	1480.27	1398.05	1463.38	1151.6	1528.05	1429.97	1135.45	1292.81	1085.79	1240.57	1439.86	1232.63	1181.68	1851.76	1373.71	1325.04	1183.27	1079.2	1548.73	1752.63	1641.08	1880.68	1320.43	1464.53	1671.38	2734.82	3351.78	1114.95	1395.06	2934.08	2576.79	1482.76	2530.79	1656.32	2183.44
AARS2	631.933	476.373	603.79	770.828	659.24	584.015	741.925	407.457	600.2	560.296	517.826	452.611	629.371	471.065	495.698	659.172	601.449	622.813	651.899	593.646	498.791	504.729	565.167	424.633	618.706	597.467	495.326	548.914	489.275	428.473	416.911	376.679	493.376	434.863	784.393	515.272	394.539	503.104	553.481	646.194	590.509	552.159	504.801	496.538	619.739	538.251	673.579	668.21	965.469
AASDH	1509.49	1186.01	1498.8	1518.05	1370.17	1252.14	1550.9	1253.38	1791.97	1010.23	1105.72	1057.89	1473.07	1208.08	956.146	1287.65	1413.29	1132.54	1098.6	1125.69	1274.86	1122.15	1031.21	1353.13	1435.65	1379.84	955.086	1199.03	1239.61	1010.44	929.114	622.182	1229.66	1011.25	1084.53	1197.22	757.852	645.217	1106.15	1329.52	1241.59	989.774	962.273	1230.85	938.286	1015.33	1142.95	1117.52	1196.34
AASDHPPT	3413.3	3500.77	2820.14	3283.87	2843.99	3342.78	3556.42	3183.83	3002.45	2768.13	3493.87	3165.43	3291.43	3044.73	3007.74	3507.65	2817.41	2466.7	2565.42	3355.65	3302.98	3133.6	2704.66	3705.22	3109.92	3339.29	1979.63	3473.07	4107.65	3888.35	3523.81	3876.17	1820.8	1548.63	2294.44	2138.61	2974.54	1984	2061.51	2145.22	2603.15	2075.23	1720.33	2344.51	2102.17	1778.72	1530.59	1716.49	1824.84
AASS	192.731	127.645	75.6415	196.029	164.001	118.252	134.833	176.527	90.6882	86.7939	122.619	73.3413	262.447	140.45	156.548	100.323	121.494	92.6058	78.2693	141.086	107.476	239.821	32.2499	57.4427	53.1984	131.443	174.159	54.9725	153.54	108.861	134.234	44.2906	31.7327	38.3898	70.0547	18.748	18.8453	96.6904	53.9688	18.1263	11.7521	27.8329	25.4766	35.8217	70.9439	0.642242	5.28115	2.59121	48.8357
AATF	1165.9	1410.81	1528.72	1212.61	1685.22	1468.05	1477.34	1222.26	1594.46	1338.94	1665.46	1731.84	1145.64	1218.74	1634.28	1268.83	1475.5	2249.56	1394.05	1680.8	1306.48	1060.12	1621.26	1131.51	1456.3	1247.02	1808.24	1726.18	1819.74	1559.38	1550.5	1712.3	1981.39	2359.39	1810.37	1754.89	1531.93	1702.63	1917.76	1635.23	1565.2	1508.89	1849.82	1368.55	1513.67	1849.38	1808.41	1394.5	1505.72
AATK	503.904	541.112	541.692	455.28	398.302	580.05	261.513	504.369	466.47	677.205	422.872	370.773	344.368	502.782	494.214	299.961	346.761	285.926	515.949	312.434	750.93	1110.22	767.944	759.338	585.645	540.1	515.871	421.118	438.516	647.07	516.312	683.928	508.66	602.041	671.84	565.417	489.066	554.329	635.673	316.695	376.496	638.5	644.872	544.319	410.032	483.699	530.963	603.999	260.554
AB074162 /// MIR181A2HG	124.758	56.1551	10.1506	13.2268	77.7068	137.635	24.3114	212.418	13.3096	45.8339	11.7919	40.4053	19.189	333.86	10.2474	22.7331	25.6077	12.3895	112.538	10.5489	11.1668	15.7927	9.49288	10.8023	23.9892	12.4633	11.1897	8.15796	20.4931	18.5511	11.7808	21.1337	18.3842	14.4691	12.6117	141.449	8.24845	16.7727	24.3734	54.7604	25.1411	9.97606	89.9564	10.8967	86.4752	22.9187	47.5015	28.6138	12.5403
ABAT	1017.23	883.845	777.282	441.557	560.394	586.702	824.791	537.248	876.214	1040.79	898.165	557.249	448.87	621.797	586.005	428.475	393.449	264.108	745.232	431.265	568.712	541.97	1178.14	975.443	500.212	490.268	543.38	462.421	446.562	586.603	672.707	765.498	1386.45	1029.43	500.653	1165.21	460.202	556.204	1124.43	795.527	831.781	826.265	1036.11	559.939	1052.97	1369.25	455.865	1159.63	588.004
ABCA1	405.713	297.91	451.583	321.167	466.494	491.643	468.648	662.981	399.034	319.029	377.113	209.839	508.754	279.681	391.752	537.335	348.667	281.171	562.32	336.068	952.384	4107.89	865.188	1770.21	552.955	1218.21	718.21	1414.41	1181.1	715.668	765.504	1446.5	2028.67	865.586	1102.59	1091.09	1048.73	1599.71	1210.18	711.031	712.688	430.308	1345.75	464.546	550.741	328.665	1163.51	978.598	561.019
ABCA11P	259.364	285.123	277.654	225.173	202.639	223.136	340.36	198.392	272.704	147.392	183.871	135.652	219.909	237.862	267.788	270.858	266.192	211.28	202.414	202.565	83.816	232.397	151.839	65.2663	101.818	171.242	195.883	229.019	220.182	286.016	233.991	174.982	208.148	162.048	224.897	139.011	183.397	308.246	177.387	137.242	179.66	75.792	190.976	59.2532	196.304	108.619	85.2337	73.4413	271.448
ABCA12	5.56541	2.56932	26.6818	39.9197	37.8224	7.42925	2.90118	26.0765	2.04888	9.57221	27.2215	3.25434	25.2665	35.458	16.7559	18.6927	10.6305	16.5543	7.04924	1.52277	11.1937	31.986	8.83956	21.5831	26.7593	11.8223	18.1518	27.7909	14.4067	22.4549	2.85264	5.14953	25.9524	1.74096	6.58105	34.5428	7.56439	36.7301	20.3886	31.6863	4.40276	26.7305	5.82648	3.4792	1.82846	28.4345	2.35269	33.3588	1.61968
ABCA13	27.8525	45.1403	14.2314	1.46348	24.1743	10.1293	53.7404	29.0049	1.17646	15.4056	16.1122	37.9196	1.43834	24.3215	1.56781	76.1344	36.1459	23.1919	91.7509	23.0162	51.561	44.3772	194.719	234.628	173.809	17.527	6.56596	61.8797	1.20327	24.1437	1.38948	49.2835	7.06217	16.8742	4.09438	27.1581	57.8157	113.819	11.455	2.09702	32.5432	966.748	2.9962	86.2193	76.551	67.4505	53.3593	51.0534	13.0079
ABCA17P	43.421	85.4778	48.5076	67.9325	70.1958	55.7267	92.6917	55.5205	86.2247	54.7196	119.67	61.3383	115.944	62.637	72.3752	81.0957	115.183	104.676	40.8642	110.305	72.4423	39.3871	75.0313	64.9938	101.126	87.4258	45.9148	90.5318	35.2829	52.0027	86.5658	36.4322	55.6052	31.5512	77.2643	42.4843	34.0144	48.1557	96.7116	106.152	44.0693	49.8658	50.6082	43.2629	87.5819	59.2159	109.259	92.9119	88.6975
ABCA2	616.527	576.426	722.893	700.414	650.784	587.907	691.033	622.564	611.467	539.876	703.149	478.909	672.833	765.566	634.553	722.035	490.287	691.188	729.855	775.162	665.647	579.222	642.091	572.148	531.946	447.876	576.151	534.441	612.405	384.425	497.05	555.689	440.89	387.107	472.619	326.129	323.258	542.097	362.854	441.613	287.317	385.87	371.055	252.875	482.884	493.459	502.572	565.083	300.121
ABCA3	230.574	44.0673	116.611	94.4049	126.726	55.0181	237.777	162.748	209.985	199.974	130.068	113.878	134.374	61.0834	90.1015	201.524	134.533	135.872	80.6192	162.354	145.87	109.823	117.236	106.459	86.5124	61.012	188.194	34.3578	151.002	96.5006	155.616	117.745	105.707	108.878	169.79	26.7681	47.6117	134.575	33.8375	132.234	45.973	265.546	113.06	47.6828	112.923	137.535	153.271	101.164	77.4741
ABCA4	53.2967	115.25	7.9449	6.65513	11.7639	10.2519	9.74097	24.6315	7.03027	65.0273	9.17581	13.6101	19.6827	129.342	65.7736	94.3174	47.9817	72.9866	47.5499	17.997	8.12773	65.6244	15.4264	33.3698	11.9471	57.3619	73.22	9.99161	15.903	16.5471	12.448	9.31463	12.3509	5.25395	14.7399	9.47202	14.2221	27.5618	13.1152	61.7507	14.5429	9.4416	61.5815	42.8731	14.054	69.6448	14.3573	19.4101	48.0455
ABCA5	575.112	382.401	643.648	686.629	681.537	443.481	736.202	578.026	548.116	353.994	529.512	343.95	931.656	523.28	767.594	655.468	666.888	722.717	657.908	623.572	485.436	448.123	256.849	239.158	395.382	343.736	576.033	547.522	473.55	470.065	401.693	160.123	269.971	290.624	367.537	458.177	365.067	424.327	401.365	254.215	486.727	240.299	296.755	1005.61	336.433	298.534	575.528	215.506	628.391
ABCA6	24.8187	11.0867	44.68	27.9058	64.4682	46.8497	16.116	21.1995	53.1206	48.2024	31.3504	113.278	43.164	12.3477	77.2703	92.1947	61.4778	14.495	29.0977	25.025	68.3076	3.7721	51.6439	10.9604	5.08212	18.8281	39.8013	38.4353	60.7485	51.7974	57.8831	25.3473	62.1433	31.9043	54.8391	11.1413	43.417	39.394	34.1021	70.6818	8.93663	39.3241	64.4509	8.97677	42.4956	17.0925	56.4616	7.88628	52.8854
ABCA7	1158.38	875.292	1361.71	1218.48	1376.29	1088.2	1171.32	1103.23	968.538	1126.02	962.989	720.868	1048.47	1145.8	1170.53	1188.22	824.934	1014.02	1419.92	928.137	1296.28	1840.31	887.189	1267.77	1360.52	1157.4	1222.99	949.017	1080.36	1072.01	1094.39	1253.93	919.171	1315.94	1197.96	756.963	839.717	860.854	1205.18	1212.64	555.892	990.594	764.201	1208.46	726.81	1043.58	896.866	832.717	837.941
ABCA8	64.5493	37.233	31.2584	9.48517	52.0765	4.83777	20.3341	3.66099	70.1826	24.494	51.7986	49.7822	35.9737	46.5952	14.4964	119.495	85.6459	82.2073	11.7655	65.8009	64.4535	19.5373	63.6213	6.71238	3.5026	3.82174	8.99593	59.0596	9.06203	13.5518	31.7597	6.52776	9.15056	40.3434	68.6011	20.6089	11.095	69.1467	7.03531	23.4482	15.1544	5.84809	14.9389	8.52216	11.769	5.71272	60.425	45.4202	3.73199
ABCA9	7.08709	71.7947	40.7501	89.3815	11.8929	34.2692	31.9108	56.9511	105.26	81.48	94.716	40.7358	81.2796	62.8963	110.051	56.3007	33.4315	93.6874	51.1579	73.1682	79.8554	52.855	49.7626	69.3205	45.5993	109.985	9.54617	76.6652	43.4392	50.0619	51.4689	12.6312	68.0304	6.8636	10.3134	41.4363	54.6829	60.9897	61.5152	94.7055	78.4756	25.4051	36.2651	62.9035	29.7951	73.3984	69.4101	51.5894	84.827
ABCB1	552.538	629.375	555.994	551.105	548.967	424.984	498.604	374.341	561.254	232.45	577.772	545.58	513.57	574.998	579.548	673.259	390.995	452.971	563.205	867.784	383.328	267.539	287.125	161.575	139.132	266.456	673.238	302.187	295.416	238.101	287.21	442.725	127.399	332.367	257.001	312.073	131.211	440.514	285.408	340.187	182.738	102.993	362.801	252.131	319.852	418.394	431.216	255.849	233.365
ABCB10	1360.69	1472.94	1338.1	1484.22	1373.18	1152.33	1252.15	1166.1	1445.76	1421.07	1446.52	1619.07	1370.11	1192.72	1476.78	1606.55	1391.75	1571.08	1561.93	1464.27	1238.01	972.622	1691.27	1475.12	1528.51	1398.49	1418.3	1716.61	1402.76	1505.55	1749.49	1592.9	1011.4	887.598	1033.13	1163.29	1614.17	1262.74	1051.5	1167.57	1285.29	1295.97	1281.09	990.849	1140.23	987.081	982.933	1331.27	980.667
ABCB11	52.2596	28.0733	58.4868	106.576	9.28547	17.7472	11.3708	18.9361	40.6211	15.4299	13.3621	40.9404	27.8266	109.788	47.8869	14.09	32.9695	27.2982	19.7239	50.1877	19.0629	56.0516	18.2369	51.5186	5.48161	64.5462	14.0526	20.5186	98.1356	67.5307	85.405	76.2006	6.17097	74.7925	13.2749	56.6024	6.23361	60.4176	41.4245	56.0225	56.1548	61.5854	106.897	68.7347	12.9236	65.0507	116.313	8.07651	26.1667
ABCB4	203.514	162.802	374.334	158.161	272.448	141.226	248.537	145.742	267.318	44.3125	193.586	177.243	259.166	228.513	145.819	127.967	86.2155	154.567	20.3019	237.91	36.235	231.82	125.632	38.3854	294.637	169.144	158.677	167.733	217.849	86.8656	157.604	172.926	129.518	214.2	230.46	33.6598	53.5263	23.6311	334.962	154.36	48.8797	7.6408	128.806	121.031	109.184	117.561	52.704	27.226	87.8398
ABCB5	16.5731	13.5856	59.3388	71.9553	39.192	73.8852	74.3345	140.857	79.1515	29.0144	56.5747	70.0757	24.0485	100.77	127.529	40.1505	68.9153	46.1061	112.283	105.406	134.519	22.5245	52.8976	119.915	76.8911	93.0905	18.9899	36.177	51.2015	29.3146	38.8795	98.4869	102.887	26.2213	34.1669	20.0991	105.359	40.5011	65.8119	32.575	122.151	127.175	22.9863	111.83	90.7697	111.652	35.8415	127.407	57.6845
ABCB6	252.773	193.085	243.409	84.4539	214.293	112.702	225.04	70.2806	128.647	192.355	222.813	141.903	226.077	269.644	257.997	216.108	187.672	244.983	37.906	238.365	215.696	78.8936	162.967	275.727	184.846	188.307	94.9061	286.483	264.387	183.574	160.065	122.686	277.475	159.882	276.789	70.9419	118.048	223.393	104.764	285.825	375.128	174.396	200.822	444.177	207.167	69.7604	351.912	220.763	179.779
ABCB7	889.205	803.172	810.373	763.748	995.402	946.469	785.731	766.099	890.99	746.645	835.011	1041.16	877.915	775.374	836.956	810.073	979.01	994.623	895.947	806.071	876.563	395.577	965.797	765.948	1005.52	811.599	855.809	794.553	802.964	892.909	772.246	696.441	988.633	767.084	875.281	831.612	618.339	675.902	660.17	1012.01	823.876	1099.68	873.181	664.284	674.584	1108.28	989.187	1130.89	819.536
ABCB8	31.2749	63.9233	131.05	194.617	142.403	132.238	129.265	89.9744	157.334	34.195	27.3937	131.112	90.3875	82.9158	50.3923	127.131	88.5961	134.132	102.221	104.825	130.791	143.803	30.6836	142.649	58.3668	28.5919	100.405	123.301	151.009	95.3717	154.691	138.381	43.8006	27.4159	21.7571	90.2854	100.393	106.38	68.5937	37.5209	130.047	9.87739	182.088	158.612	69.1093	115.992	65.8032	172.745	105.285
ABCB9	132.806	15.0257	55.8342	97.4981	26.0378	81.3127	52.5237	125.641	63.5192	24.7974	132.362	7.15279	102.23	90.4305	156.408	111.968	178.071	116.441	133.066	110.089	61.8204	27.9267	130.7	59.3776	125.14	67.6762	141.983	17.5645	19.1098	48.2483	38.9702	20.3879	82.7054	95.3991	28.4468	140.264	127.111	110.427	80.9347	19.9752	30.8992	131.702	80.6629	59.4972	113.833	149.266	124.166	58.362	39.1269
ABCC1	1902.48	1876.92	1925.93	2138.86	1906.33	2177.1	1722.52	2012.36	1758.97	1706.75	1797.8	1746.69	1688.65	1721.19	1891.85	1775.87	1519.12	2398.86	2220.42	1894.71	2063.59	1774.4	2482.87	1800.67	2013.07	1826.19	1861.41	1626.17	2128.86	1586.65	1809.97	1628.44	1461.04	2155.76	1920.11	1773.17	2543.11	1752.84	1961.63	1847.62	2213.91	2247.63	1929.29	1820.59	2760.75	2002.89	1780.18	1828.42	1957.07
ABCC10	1570.86	1190.67	1469.83	1627.18	1324.38	1437.06	1313.58	1281.17	1417.09	1164.16	1762.2	1478.9	1997.15	1201.68	1524.16	1860.01	1574.93	1587.16	1772.28	1693.93	1501.55	1252.87	1567.84	1687.77	1812.88	1292.23	1407.54	1240.29	1692.58	1284.63	1647	1320.4	1035.25	1073.68	1127.31	1301.01	1355.6	1295.38	1058.54	1180.04	1148.21	1435.19	1084.08	1320.85	1478.88	1274.8	1220.73	1091.04	1111.87
ABCC11	81.8898	86.6919	134.619	30.7484	20.6111	23.4273	20.5802	19.4178	80.8817	119.163	118.249	65.2511	124.639	72.7289	83.6807	41.1505	89.0633	74.8156	71.5441	64.4988	76.687	98.9092	34.7111	21.3477	60.0329	24.5703	48.6835	61.3284	92.3921	76.1536	132.685	84.5253	78.0358	73.7551	71.5424	69.6038	67.8157	97.9725	107.788	113.74	102.265	110.883	129.003	76.2794	88.5179	39.1975	28.1072	63.8386	32.4566
ABCC12	31.6892	44.9845	8.986	28.9377	15.1853	20.7721	39.0175	3.33801	3.1491	71.8136	38.3741	16.0989	79.8609	7.68695	57.1925	51.1445	19.4669	18.9034	6.4601	27.401	15.1177	40.9603	30.6318	23.5067	40.6052	4.69865	71.8308	8.00768	35.4928	31.1913	30.54	38.2778	18.1605	3.18818	10.2778	10.4915	65.0065	9.24165	53.331	52.7462	10.8611	30.7547	20.0521	4.20912	28.1192	60.4869	43.7396	3.68621	5.98744
ABCC13	98.1023	153.66	83.9551	61.3818	8.51588	72.1932	78.5989	79.6508	34.6513	65.4659	101.665	130.543	57.4617	141.395	77.1067	24.2537	240.418	39.0883	70.5897	86.7197	96.1885	20.8215	52.7806	203.781	55.0853	19.5948	30.7386	85.8569	11.9342	71.322	53.3438	96.4676	135.486	13.1736	105.709	65.8466	195.153	63.6864	65.4285	59.0942	161.017	172.404	59.5728	206.409	88.0586	30.9606	74.1768	509.146	186.405
ABCC2	28.9514	30.4542	15.0254	5.70108	67.1417	35.7613	87.9207	9.98815	35.1986	15.2667	24.0838	92.6449	9.43096	16.4762	106.523	93.0107	60.2255	157.862	34.1543	27.6378	20.2897	15.9835	16.0909	112.754	14.3557	52.2628	57.901	27.8434	79.9884	7.95971	5.98622	8.0914	59.9519	15.0355	5.98677	10.2693	47.8182	53.0312	22.3589	72.7081	36.798	8.27106	11.0524	10.0291	8.50972	5.91454	95.8418	7.56417	4.77664
ABCC3	603.606	754.433	680.395	644.754	401.137	610.881	591.806	575.01	522.828	792.314	412.966	258.164	243.983	340.269	219.963	234	563.222	461.315	740.428	498.836	892.41	504.622	648.806	752.629	149.89	428.986	345.572	285.022	244.131	451.788	580.203	559.342	404.842	965.944	281.747	742.978	663.624	982.355	647.084	220.812	541.51	597.563	493.205	839.808	582.023	491.054	994.182	578.699	403.836
ABCC4	450.73	580.106	764.625	402.138	477.66	458.126	470.533	669.544	794.779	1058.43	358.877	474.863	322.142	386.491	263.284	345.841	459.552	577.313	330.153	509.677	492.921	367.236	608.255	505.864	251.025	244.822	289.432	681.116	370.624	346.931	500.407	198.166	430.146	695.128	275.671	466.98	802.716	664.712	374.885	295.5	412.133	681.004	459.022	454.74	560.649	236.49	718.598	319.066	321.541
ABCC5	825.036	640.201	892.041	938.439	996.905	822.077	813.813	1080.34	710.201	750.79	894.449	955.459	978.863	835.712	838.731	990.342	764.866	917.919	991.19	952.742	960.738	780.629	746.81	692.076	787.88	720.227	931.926	805.096	924.94	1026.41	990.692	828.296	925.61	799.75	809.555	805.564	590.191	678.575	978.148	857.824	724.919	818.913	964.097	819.002	886.831	1001.52	818.127	1158.48	869.606
ABCC6 /// ABCC6P1 /// ABCC6P2 /// LOC101930322	268.529	276.824	233.092	291.595	215.12	289.906	152.823	265.939	262.458	426.222	269.252	375.286	181.484	207.676	146.499	184.113	237.156	288.256	220.109	209.449	277.873	134.061	514.4	331.926	279.872	290.012	294.267	177.476	217.114	255.575	301.678	232.088	448.118	284.544	190.662	312.759	222.109	335.338	211.208	194.699	280.627	411.149	280.057	172.032	275.707	331.942	226.417	400.96	143.238
ABCC6P1	9.8168	42.7462	58.0726	30.0476	111.101	9.78624	6.18396	12.6648	60.403	11.2089	66.5999	8.03652	70.2059	8.02108	57.1321	46.3282	43.2825	108.942	29.6433	4.98224	66.8985	5.78681	52.2247	53.9024	30.5882	9.65233	45.8598	4.90036	42.8843	11.8266	28.6928	31.2932	62.6521	6.64608	70.0127	17.1203	69.5493	42.0417	76.9799	7.35081	3.17353	31.1572	26.9169	70.8486	5.04552	15.5435	55.6804	51.8473	16.0405
ABCC8	13.9116	10.5321	16.8999	14.4452	6.74084	9.85323	16.2591	13.4139	18.6217	15.3718	21.9325	10.5305	10.2621	14.8975	22.0789	11.3087	15.456	38.0098	15.0464	9.4591	24.6206	24.6646	30.5276	8.92999	11.1234	17.766	9.94871	11.8131	14.4532	28.1671	13.6198	16.0646	9.66827	25.9612	14.0234	5.62193	13.3045	25.6239	14.6183	30.5731	12.6557	17.1598	17.263	22.298	15.445	30.4855	5.9745	26.2587	15.3396
ABCC9	21.915	67.319	35.7959	37.8735	7.04072	6.91648	6.86056	22.254	28.345	7.69845	12.3426	84.6134	56.9719	41.021	121.77	70.3243	90.105	8.07341	8.87279	47.7643	27.7865	111.882	23.9279	26.2447	8.97057	8.46991	44.5601	74.6461	50.4133	60.6957	42.6155	10.79	12.8359	67.3875	8.79601	48.3998	42.8652	69.6931	5.3787	47.9784	12.3164	22.285	44.5395	27.9885	7.29727	6.90563	75.9661	55.0975	40.9711
ABCD1	456.016	406.785	356.224	429.1	452.595	501.315	353.475	412.691	609.755	651.245	555.65	490.797	517.816	447.139	518.414	536.587	414.847	344.969	585.996	345.773	593.579	640.914	1217.81	814.671	627.876	680.639	292.351	535.755	567.342	457.665	566.77	585.754	773.15	1004.98	651.702	680.097	576.362	539.489	594.317	622.213	415.084	577.096	650.538	362.35	292.678	694.702	855.495	670.562	623.371
ABCD2	188.978	302.444	209.32	274.504	203.645	186.666	231.035	148.216	238.935	72.1063	101.488	177.443	293.767	209.46	184.614	191.269	220.487	151.949	118.658	180.804	127.463	202.435	87.608	86.5306	88.7137	112.648	171.363	186.743	173.877	230.19	152.373	98.5804	53.4965	87.8589	91.1145	121.071	138.05	127.159	104.601	125.543	97.1406	31.6303	43.8862	95.6176	135.598	31.0851	45.4996	67.4079	282.169
ABCD3	1728.69	1391.63	1527.99	1757.67	1611.26	1779.41	1458.74	1512.31	1476.11	1447.53	1533.21	1577.06	1950.1	1716.34	1712.14	1908.92	1441.75	1377.44	1653.55	1940.35	1610.3	1058.56	1411.66	1568.31	1545.8	1216.33	1221.49	1406.22	1895.92	1830.27	1611.9	1606.19	1356.92	1007.63	1311.43	1300.58	1225.32	1200.53	1327.84	1266.06	1413.56	1853.98	1622.47	1206.96	1099.27	1830.02	1709.73	1271.04	1313.77
ABCD4	760.387	657.27	798.963	692.818	598.684	288.975	739.645	668.336	811.545	687.828	528.671	736.822	716.82	688.673	645.738	600.556	689.611	652.924	681.209	896.35	769.497	622.472	590.096	542.829	744.609	723.574	743.613	515.149	589.437	662.624	788.01	528.141	504.868	481.023	498.499	628.29	344.994	626.407	557.925	715.782	546.97	337.643	491.992	598.973	721.757	491.481	470.395	464.517	573.632
ABCE1	1366.17	1749.2	1620.4	1608.29	1782.03	1693.12	1851.3	1301.97	1591.84	1243.79	1374.09	2216.68	1757.93	1515.44	1294.18	1414.44	1490.49	1234.14	1439.52	1624.35	1140.31	1197.43	835.329	1023.93	1168.6	1261.79	1325.33	1633.96	1702.57	1837.8	1507.98	1242.41	1189.29	1086.75	1398.68	1231.74	1239.88	961.158	1191.85	1448.72	1226.02	1016.99	934.445	1472.58	1249.86	1154.01	1000.08	1123.79	1514.9
ABCF1	2055.95	2140.15	2053.67	1988.19	1993.27	2222.14	2173.63	1949.3	2203.62	1922.05	2162.57	1816.56	1684.01	1932.63	2203.1	2007.3	1839.95	2515.15	2207.57	2081.23	1826.37	1909.38	1874.73	1801.39	2654.67	2276.48	1790.27	2815.52	2229.98	2209.53	1923.76	1898.51	1592.16	2188.04	1884.06	2158.78	2275.83	2280.98	1869.7	2661.19	2107.23	1564.67	1990.41	2097.46	2244.54	2207.44	2366.88	1860.8	2676.77
ABCF2	934.755	939.146	1105.62	943.868	1117.21	978.023	1274.32	1076.97	1000.09	1080.59	920.494	1254.21	1021.9	925.18	861.089	845.677	899.626	1065.13	966.009	1069.21	906.799	964.665	918.117	1197.32	741.421	941.031	929.348	1108.36	931.92	1102.52	1113.37	932.359	1126.65	1006.73	1125.86	1037.67	780.673	985.784	1058.77	1024.05	1123.22	1007.43	1241.18	974.11	1078.76	1111.01	975.284	1135.17	975.871
ABCF3	497.342	495.425	504.106	663.118	366.289	478.086	538.995	417.851	389.252	492.075	412.712	438.676	574.051	837.94	736.795	387.883	566.886	531.488	433.441	569.913	562.098	498.01	405.299	577.331	418.363	559.451	369.884	578.591	544.62	634.192	552.168	571.201	611.518	502.402	666.784	635.441	469.97	367.603	557.649	636.093	656.217	560.279	541.891	765.016	679.531	567.561	720.07	463.403	605.429
ABCG1	450.638	363.152	583.989	420.302	491.114	524.074	546.975	770.778	509.174	346.609	381.108	362.328	625.914	597.203	673.566	582.166	397.546	220.524	454.065	515.404	1152.55	3193.24	287.735	700.128	387.065	644.153	442.162	709.423	852.353	981.124	799.194	918.893	588.39	352.358	458.538	275.056	525.608	497.097	520.411	411.4	466.646	143.59	399.565	397.569	237.175	188.469	453.091	386.744	313.958
ABCG2	94.7994	147.588	104.622	62.336	15.6145	83.7997	60.9153	52.1953	57.8901	128.081	147.763	172.264	8.96655	114.7	56.0036	24.0321	150.403	129.061	118.222	174.796	55.2407	81.1358	83.5093	98.0482	98.4404	72.7695	31.1958	105.895	105.703	59.0109	103.863	109.539	43.7041	178.349	76.2792	88.1387	268.165	95.1775	138.814	104.311	49.8093	74.5461	67.2588	169.892	132.711	28.4467	14.8301	206.08	206.316
ABCG4	58.929	111.757	117.78	84.0583	139.714	115.372	139.701	119.697	125.545	161.883	121.22	98.0712	202.301	212.073	134.596	105.349	168.542	161.968	116.95	132.727	137.109	118.687	167.369	121.785	149.796	128.556	173.614	127.197	118.411	96.1717	145.083	73.5838	169.525	161.976	99.9361	127.157	76.2714	121.375	117.696	193.165	179.591	173.637	192.395	129.627	172.344	136.418	102.064	109.555	146.899
ABCG5	2.74048	3.48751	2.82074	3.43626	2.93011	2.51364	5.9712	5.92589	7.77002	10.6908	4.67148	5.96288	11.0509	7.06233	11.9963	4.8261	11.3316	47.2943	5.33096	3.85101	7.43257	2.92387	3.54521	5.13861	3.80883	11.4302	3.45809	8.13978	6.17934	19.1919	6.44297	6.13896	4.54578	10.9184	4.20892	4.9558	2.86741	4.5558	8.94353	9.06466	9.58063	5.51052	3.25665	6.03396	3.21058	8.3221	3.55168	2.62901	5.56188
ABCG8	10.5178	18.9252	11.8521	14.6607	11.7272	12.1406	12.5557	11.5777	17.446	21.9169	35.1909	22.3488	16.6532	20.7751	18.8238	100.233	22.946	132.946	19.9091	10.5747	52.5297	17.6934	67.4753	13.3144	12.3909	14.5622	13.8044	23.2761	8.19208	18.9377	23.7387	40.8084	13.4601	11.3509	18.9719	34.9113	11.9405	8.11671	24.0821	21.0811	17.8226	12.4639	8.90372	17.1805	17.2602	11.4147	22.6056	18.368	12.7754
ABHD1	174.592	194.809	152.199	127.532	104.467	152.37	176.453	73.6119	177.242	69.0876	169.888	223.466	222.507	172.216	199.182	224.679	164.671	240.981	173.776	205.188	161.685	125.459	149.022	167.77	112.548	139.695	209.094	172.404	142.817	211.405	152.823	82.6165	96.8387	94.3981	121.612	134.956	148.692	191.748	156.601	223.034	156.208	164.224	146.226	107.097	173.386	59.029	108.424	195.46	69.8417
ABHD10	1412.42	1351.77	1211.84	1325.62	1108.3	1493.55	1127.35	909.281	1339.39	997.766	1321.43	1506.41	1403.52	1467.7	1400.67	1039.39	1307.69	984.407	1332.17	1079.33	1202.54	864.019	1197.44	1154.82	1479.81	1298.66	846.8	1157.84	1614.78	1360.49	1252.36	970.065	1501.49	1267.23	2035.65	2027.83	1356.88	905.392	1780.1	1966.84	1899.61	1568.19	1415.33	1913.37	1709.07	2046.65	1213.25	1661.97	2023.92
ABHD11	568.897	465.815	562.533	490.626	514.769	656.791	488.381	582.909	569.475	625.522	491.988	439.966	610.295	648.086	691.949	595.067	472.489	646.404	677.718	450.078	610.795	479.543	684.803	498.812	462.46	629.463	477.899	553.074	487.668	657.934	802.568	900.162	842.105	874.533	512.46	575.361	607.796	761.145	701.339	405.831	545.04	575.023	721.188	459.143	474.198	722.78	548.37	865.946	581.379
ABHD12	647.973	910.294	769.13	893.422	738.652	927.492	773.434	580.738	850.18	754.62	1002.65	1274.04	729.506	946.543	621.435	733.833	670.473	879.913	572.57	673.174	777.628	406.087	569.655	448.338	462.492	583.962	856.887	658.7	884.264	758.579	822.022	929.028	919.081	819.979	629.173	874.242	768.404	810.208	624.552	737.721	688.228	621.384	755.555	586.376	709.356	750.982	750.51	694.984	663.499
ABHD13	213.57	205.651	229.089	233.58	242.881	197.83	235.449	216.584	333.51	226.867	320.128	394.373	375.63	311.819	296.477	231.147	243.648	397.654	404.312	238.656	296.649	325.023	301.283	276.756	252.59	345.41	526.124	203.399	279.975	372.891	342.496	356.459	237.582	176.684	137.975	133.165	358.114	358.55	144.553	67.8697	58.7631	181.744	247.743	71.1675	89.3836	230.406	160.023	107.14	132.374
ABHD14A /// ACY1	713.995	638.403	800.113	806.312	815.765	652.809	869.26	633.609	797.942	602.12	595.436	777.299	638.791	529.437	510.877	567.36	572.879	644.351	584.793	570.059	585.391	549.191	615.037	523.311	642.59	607.74	523.42	762.723	696.486	811.614	628.918	488.863	696.008	749.907	809.27	808.448	766.923	922.429	714.897	992.266	737.417	528.581	751.785	1112.47	860.047	543.127	788.457	389.623	883.004
ABHD14B	1869.98	2185.39	2279.04	2156.69	2225.32	2003.37	2475.21	1916.58	2538.03	2127.05	1821.67	1720.11	1300.61	1552.21	1741.91	1610.91	1855.37	1845.6	1674.88	1907.29	1695.35	1466.24	1578.94	1138.96	1740.55	2267.55	1822.07	1470.9	2071.39	2461.46	1620.47	1328.34	1336.31	1894.73	1626.35	1051.78	1450.12	2258.48	1406.71	1620.34	950.338	815.947	1309.81	1553.87	1703.91	1064.25	1835.92	1300.86	1729.35
ABHD15	733.897	888.3	984.231	858.11	839.741	805.456	782.966	780.659	886.466	971.875	722.878	880.339	865.479	877.014	739.998	935.214	760.946	891.655	713.548	1143.49	816.641	525.979	567.701	461.401	546.305	709.827	885.713	514.588	676.683	744.496	643.617	659.841	489.492	956.819	578.278	633.323	557.282	595.339	490.32	596.753	524.747	485.859	552.189	356.58	636.309	648.379	650.947	614.464	559.991
ABHD16A	82.94	29.0102	92.9568	14.0872	117.076	22.4524	48.171	19.699	30.6258	45.6237	72.6574	93.1375	62.4782	19.5431	69.8758	72.685	96.2993	89.0037	84.1766	70.0244	58.3588	19.3349	79.9203	94.2051	14.8665	73.5045	80.4718	88.0267	89.0173	66.3196	92.2756	10.9397	83.2828	94.1228	43.305	44.0179	79.0114	79.7813	57.6732	176.296	32.096	78.1869	28.1952	19.4499	98.827	133.156	25.1834	143.737	99.2924
ABHD16B	7.21357	6.35333	8.18306	8.8588	7.9996	8.0485	4.59456	9.31708	5.69481	8.76885	5.58775	4.89577	7.05779	6.81645	12.908	4.93081	5.83368	5.95448	10.9014	8.02907	8.46257	7.60311	10.1844	5.07391	8.99134	7.46081	7.88871	10.5124	7.35814	11.2275	5.40842	10.0623	9.90587	13.0065	7.00355	7.89649	7.99505	7.1437	7.85561	6.56611	12.9258	6.19772	11.7033	15.2185	11.3619	12.384	9.39473	12.4395	14.1143
ABHD17A	8226.51	10562.4	9724.27	8212.35	9244.21	7992.5	9323.25	9167.44	7513.51	7990.47	7867.27	8752.23	7596.65	10363.1	7701.42	7876.57	6199.27	6191.53	7608.93	9587.35	7765.23	6117.66	7514.45	5770.33	6585.82	6300.18	7886.17	8269.19	7419.95	6641.45	6714.38	8009.55	8548.52	12073.6	10434.2	10654.2	6467.75	9354.89	8135.15	9959.37	8388.31	7967.9	9851.42	10573.7	10550.2	11136.7	13863.8	11658.8	10807.8
ABHD17B	1290.1	1730.79	1172.81	1536.98	1425.1	1469.76	1290.81	1113.88	1396.34	1135.74	1717.48	1622.5	1613.17	1417.28	1571.34	1624.38	1573.79	873.454	1609.28	1858.45	1641.02	1205.85	1520.76	1423.03	1946.63	1452.51	1336.94	1801.79	1939.19	1603.46	1715.79	1868.03	1107.09	875.621	1304.21	1173.75	1213.9	1020.96	1141.26	1437.86	1063.89	1219.16	1133.17	1317.67	1122.07	1301.36	1031.32	1152.28	1114.98
ABHD17C	184.672	173.503	147.503	245.364	236.242	157.235	145.983	194.075	186.257	253.899	250.592	122.879	155.522	316.349	184.198	204.46	111.888	112.571	250.48	187.883	168.161	154.987	172.747	104.414	148.454	142.602	246.785	188.345	271.788	181.528	228.23	256.809	85.975	148.51	87.5338	137.168	185.248	167.957	126.921	186.317	125.301	167.509	146.939	83.3019	161.914	49.2537	257.839	174.888	86.3976
ABHD2	1803.76	1696.82	1230.6	1408.52	1851.11	1620.33	1474.51	2016.02	1772.79	1463.98	1901.23	1250.95	1470.47	1874.15	1389.74	1555.9	1431.51	1401.44	1891.65	1401.39	2154.79	2044.48	2041.24	1717.14	1804.82	1958.74	2167.02	1244.17	1566.11	1671.38	1595.88	1621.32	1328.9	825.545	1152.14	932.309	1259.45	1201.87	1004.99	855.39	804.374	1345.7	1669.83	760.311	916.593	1416.54	1451.3	1243.6	887.464
ABHD3	4518.98	3537.28	4032.56	3749.49	3992.87	4629.13	5046.48	5675.6	3539.42	3866.65	5395.21	4085.25	4395.55	4726.56	4553.53	4750.14	4755.03	2985.96	4384.07	4277.66	4708.22	7771.65	3639.56	5313.16	4140.13	3919.81	4559.15	4742.05	3881.14	4676.52	4961.6	5783.19	832.148	850.902	1693.81	1123.87	3653.4	3808.21	1255.43	1150.12	1648.74	1333	1159.01	1186.5	1931.66	1224.65	977.392	1021.5	697.086
ABHD4	1009.52	1223.48	1119.96	1132.54	1040.82	1073.9	1036.13	1311.44	1010.64	1640.84	810.535	740.848	909.976	1070.42	1169.26	1050.45	972.966	896.58	1035.99	987.142	1430.92	1371.29	1440.18	1665.92	1034.85	1283.52	941.224	933.807	834.582	1178.51	994.069	1315.73	1650.95	1075.72	1084.38	1177.84	1076.77	1182.25	1329.96	949.763	1295.98	1163.32	1119.61	1095.39	1165.1	1110.05	1093.81	1382.59	941.886
ABHD5	512.151	460.926	439.538	624.81	505.291	744.398	368.015	912.069	576.143	655.661	650.686	458.151	439.672	799.773	524.669	729.653	379.832	543.93	577.493	487.325	1337.74	2384.01	780.144	1094.93	557.373	764.471	1141.04	506.55	690.457	555.257	791.769	1346.87	437.303	184.891	304.719	301.924	688.843	1133.02	633.227	175.203	285.077	1291.62	519.616	299.008	315.727	350.467	567.384	566.247	197.986
ABHD6	524.778	463.384	248.324	298.706	325.032	428.264	297.046	385.026	330.449	333.788	316.21	253.001	336.789	285.939	235.047	352.557	365.82	227.5	327.844	361.84	370.46	134.529	619.13	349.411	412.959	371.788	230.195	366.89	354.859	341.366	315.628	317.841	504.831	438.664	456.268	635.543	318.65	261.937	437.113	361.616	313.601	813.874	427.458	323.781	514.724	552.924	564.334	383.608	578.008
ABHD8	126.141	262.129	226.302	172.822	128.556	109.667	62.7716	185.098	241.849	109.937	67.361	106.085	20.3154	55.6673	154.061	31.7776	143.613	27.0005	118.583	36.6184	80.9142	153.725	247.69	229.685	166.875	206.909	65.4647	43.1828	69.7224	226.815	277.566	91.1245	292.322	203.682	80.4321	205.688	101.066	175.491	165.684	167.513	208.544	182.878	260.914	47.9257	115.939	266.503	288.563	169.14	180.858
ABI1	4208.5	4670.04	4406.71	3834.55	4141.55	4486.79	4297	4127.91	4146.67	4220.9	4584.14	5536.35	4892.58	4689.4	4080.83	4188.3	4030.68	5019.23	3941.11	4436.49	3918.51	5264.71	3155.46	4192.85	3486.82	3981.82	4365.87	3791.44	4525.86	4535.56	4309.52	5573.67	2936.01	2980.34	4391.92	2514.94	3169.87	2928.23	2939.13	2953.92	2459.22	3312.3	2913.39	2671.29	3028.31	2409.07	2166.72	2689.71	2364.01
ABI2	1155.2	890.037	1343.92	1275.05	1381.99	857.46	1212.71	866.059	1329.06	939.441	932.646	573.924	939.574	852.909	791.298	871.283	1191.29	1098.32	954.62	997.057	919.906	859.199	736	508.724	766.87	862.832	930.111	868.188	975.026	806.505	819.271	368.748	712.694	813.575	851.095	867.044	700.516	961.592	920.337	1053.23	703.92	618.241	509.95	767.99	773.915	761.529	893.95	666.941	924.989
ABI3	893.324	1629.48	825.765	755.086	1091.93	835.559	804.389	1322.86	931.969	1607	922.855	1016.08	791.366	1356.74	1049.34	1031.64	1285.07	1013.06	919.253	1085.42	1319.95	520.322	1258.94	1165.16	756.341	723.421	604.589	847.598	1114.27	928.052	1160.93	1237.54	1121.21	1345.15	1008.17	1116.06	930.759	832.426	988.369	874.972	1027.01	955.565	1108.44	407.138	911.725	1124.35	921.337	1213.88	721.464
ABI3BP	1.03312	74.8472	20.1892	4.71676	3.87192	3.79577	23.4391	3.73032	27.1094	2.49714	20.0609	81.4077	10.0284	13.4099	92.4918	56.1439	38.0802	10.6756	22.3749	69.3459	2.92214	65.8612	79.1509	30.6447	13.2456	24.4891	51.6706	13.623	8.90819	3.39129	6.69125	11.4947	6.47741	2.30815	9.58413	2.58414	26.6148	3.28402	6.64566	25.4678	42.4313	24.9765	5.87853	8.63009	5.53042	4.94586	2.05528	5.88095	7.47428
ABL1	1073.81	956.806	870.651	889.216	898.846	902.99	783.706	755.052	950.407	1117.31	877.344	543.46	801.803	1020.45	674.951	774.646	742.563	611.194	854.285	872.544	1002.53	665.436	1062.28	975.452	941.521	964.685	683.537	792.093	1017.76	721.791	880.672	962.588	845.36	871.343	831.928	748.005	854.187	1060.2	906.199	1016.28	770.921	996.422	880.162	981.09	1165.84	1005.82	1014.21	949.16	963.697
ABL2	505.835	489.631	599.64	575.599	738.117	484.033	594.922	614.058	611.207	547.664	617.352	444.429	571.117	605.17	723.244	600.108	568.063	706.938	659.762	661.292	415.903	575.216	462.325	530.056	443.642	387.021	692.429	291.888	418.465	499.454	446.16	315.67	302.55	417.09	605.375	317.491	381.979	429.568	605.257	530.229	481.736	343.425	322.404	640.87	573.419	388.884	513.185	479.45	448.505
ABLIM1	4519.17	3738.11	7166.48	5379.7	6193.66	4757.26	8071.72	3190.23	5047.61	2881.2	3529.72	4871	4939.05	3869.29	5610.11	4462.45	4360.24	4817.08	5320.5	6033.13	2735.92	4266.26	1891.65	1430	3616.49	3120.39	6206.78	3598.89	5502.19	5410.38	3722.12	2616.71	2195.95	5395.86	6643.01	3663.83	4399.84	3418.98	5232.98	6675.68	3822.62	1114.9	2676.32	5951.12	4952.1	2713.82	2836.42	2309.98	8408.06
ABLIM2	154.668	319.679	197.756	182.436	114.322	176.181	43.7155	258.878	233.573	185.443	174.258	184.784	111.674	203.379	190.334	161.412	211.278	302.114	177.199	299.992	214.166	77.7909	133.659	213.524	203.761	250.995	152.932	292.75	207.094	246.238	214.006	278.368	234.831	210.282	86.8081	139.936	94.5629	286.433	173.635	188.564	109.231	111.68	185.899	295.669	261.769	203.267	236.612	40.6108	186.068
ABLIM3	48.9453	429.497	314.839	23.2199	128.396	220.645	247.291	244.365	227.93	692.353	19.1939	115.963	22.6646	23.3641	36.0079	98.8052	290.667	131.163	210.711	258.243	174.425	313.235	780.959	369.565	27.0243	134.336	34.7164	330.004	25.7714	19.7342	24.1184	35.2243	238.153	595.527	41.5119	387.672	454.418	716.832	332.84	53.7988	341.383	548.355	31.9097	411.592	403.57	235.056	308.219	223.684	162.916
ABO	27.4203	40.4027	116.852	24.588	52.8017	136.483	30.8186	36.8893	188.298	23.2457	12.0703	58.7037	19.3876	50.7612	121.552	18.111	24.1643	110.341	49.5917	52.4906	65.0855	88.0874	26.6095	86.4791	93.1804	82.5208	27.5197	49.9471	31.4818	16.4505	141.696	41.4364	53.6642	127.001	57.0798	44.8215	94.7621	106.524	173.723	302.87	42.9838	21.9723	86.8098	127.64	86.0251	146.711	63.2007	39.094	221.804
ABR	1800.01	1977.17	1802.35	1779.27	1938.59	1958.39	1582.82	1932.89	1822.96	2162.82	1752.04	1370.85	1685.76	2252.07	1656.37	1666.26	1756.66	1714.37	2228.22	1676.82	2372.74	2200.44	2681.34	2357.41	2604.38	1793.95	1613.49	1539.07	1969.6	2051.49	2047.8	2174.96	2691.27	2880.18	2657.06	3110.45	2330.84	2007.21	2625.93	2428.34	2307.02	2606.76	2736.01	1693.28	3077.84	3132.77	2552.73	2836.72	2390.51
ABRA	38.2715	69.8617	42.1756	27.1856	65.9897	47.7084	38.8475	43.0609	53.6784	105.256	36.5925	42.1022	114.915	68.9276	34.9836	72.1423	62.9316	68.9121	42.5499	63.4424	36.6529	57.2376	51.6457	24.7151	28.0474	53.7221	72.18	33.1317	36.1056	51.8771	49.898	40.4809	49.3602	42.6605	41.8983	57.7411	45.6679	103.538	63.251	28.7015	43.7312	48.1735	40.1346	42.8403	62.5845	30.6319	21.9872	3.83352	35.4862
ABRACL	5270.32	5894.56	5184.9	5961.61	5626.37	6226.96	5944.01	5380.65	5296.64	4782.77	7409.88	7690.4	6538.5	6868.95	4880.4	6196.52	5225.93	5696.48	7104.7	6714.91	5469.67	4349.15	4730.46	5427.98	5214.65	5936.17	3901.74	7621.43	6608.91	7606.7	7118.24	5627.72	3423	3576.31	4581.83	4264.5	6572.02	6147.02	3550.06	3439.47	5671.75	5134.12	3888.34	4627.61	5641.86	4838.49	3223.69	3099.61	4157.58
ABT1	1031.12	1047.52	935.814	968.47	1024.33	930.805	1115.94	908.448	954.432	739.803	904.959	1092.41	873.55	964.338	1002.13	859.658	1008.98	1088.42	947.283	922.286	720.856	698.792	514.107	725.423	791.457	970.862	1157.47	1245.05	1179.66	1033.96	1121.65	1150.72	1196.45	1179.23	1138.8	1152.35	840.445	831.19	1006.11	1284.54	1055.84	748.162	1146.56	986.34	1028.63	1091.17	1105.96	1150.32	1377.16
ABTB1	1414.31	1414.02	1429.7	1582.01	1322.47	1491.32	1389.26	2111.06	1526.18	1516.03	2223.61	1619.96	1581.93	1468.02	1604.94	1674.19	1546.18	1265.62	2101.16	1383.63	2535.4	4216.31	1755.98	2234.06	2213.74	2179.41	2499.45	1669.76	1851.02	2556.48	1962.96	3219.02	2874.18	1744.16	2724.33	2057.13	2317.84	2609.5	2757.2	1354.43	1499.22	3292.82	2824.61	1527.43	1474.32	1535.12	1954.85	2489.93	1499.71
ABTB2	131.221	176.89	189.476	130.561	149.573	102.231	193.442	94.7667	74.3643	296.436	172.855	219.364	111.09	198.576	202.935	148.878	153.504	197.577	173.019	152.011	226.605	250.475	115.47	271.08	96.9399	110.618	175.141	128.661	84.4234	124.762	179.423	242.351	197.828	366.299	301.972	335.291	255.214	97.5409	165.761	248.888	243.84	267.333	157.302	147.478	254.83	183.938	120.639	167.977	240.818
AC002310.12 /// AK056973	166.622	241.841	227.016	260.861	211.227	242.029	266.047	182.48	229.102	124.64	192.781	197.172	314.782	168.108	174.988	233.51	267.884	226.37	157.724	233.533	212.485	233.761	174.201	173.435	201.128	190.245	187.63	252.266	229.214	249.629	209.373	190.143	336.145	238.837	211.445	227.956	162.237	232.991	244.509	205.805	200.971	205.423	223.618	295.138	185.797	188.729	193.142	183.532	211.707
AC005523.2	220.359	208.402	198.862	231.914	165.156	173.281	194.453	190.397	222.755	210.302	329.22	180.799	223.687	214.94	177.398	234.732	234.109	251.236	244.21	241.465	168.064	214.349	266.947	231.05	192.817	227.232	243.052	264.539	206.288	184.51	261.511	208.606	490.356	384.394	404.948	567.332	329.353	187.979	411.24	544.431	472.227	408.367	584.082	429.194	356.45	575.112	473.613	554.31	487.334
AC006129.2	473.077	481.25	695.268	833.208	662.893	368.419	694.725	449.372	657.49	376.126	394.03	542.764	968.667	581.294	617.462	471.175	677.542	452.821	302.786	486.003	278.551	435.608	16.5916	185.597	401.778	330.917	348.731	424.707	630.94	581.257	403.109	271.491	151.323	71.6993	456.889	211.313	137.2	230.942	344.162	322.764	461.739	125.248	125.427	256.623	101.016	286.021	169.722	209.92	571.181
AC010980.2 /// LOC440934 /// LOC440934	62.9404	82.2418	40.2123	48.156	58.6751	91.2906	38.8661	74.3779	46.2998	35.6624	97.615	99.0724	44.3092	79.4952	48.2986	71.3421	65.6495	69.334	60.6571	51.1833	130.864	16.76	53.1185	30.3363	76.9343	67.0467	62.7362	116.594	77.2187	60.7193	80.2427	53.3296	43.7307	84.7464	101.63	41.6185	90.995	88.9378	107.367	27.2665	47.7338	78.7767	26.1115	87.7933	99.3927	57.4901	122.315	137.615	94.0226
AC016831.7	256.282	123.291	240.654	240.862	199.405	178.587	132.141	193.31	219.054	128.807	127.995	124.655	244.558	191.11	148.775	191.165	207.483	246.587	180.173	157.161	138.664	173.637	202.325	148.869	68.0296	153.261	177.443	199.338	198.023	116.27	209.551	98.7751	112.976	160.944	199.554	167.426	154.656	578.545	305.194	466.185	269.509	176.541	276.537	237.313	318.617	253.481	846.152	216.801	324.189
AC018755.16	562.384	648.816	588.555	638.875	631.902	794.067	808.503	568.841	578.132	483.338	626.646	646.293	523.492	760.744	659.216	578.113	574.714	488.314	604.929	590.294	531.256	604.481	514.87	603.24	434.932	663.944	425.442	827.476	659.997	709.935	673.139	686.443	783.466	601.596	687.488	735.006	654.853	457.451	628.25	765.915	773.918	565.396	558.412	491.345	597.928	616.446	630.414	773.23	580.021
AC074212.6	50.4949	64.7596	117.152	61.4384	41.6628	41.2096	20.5748	24.6116	85.1764	122.904	92.9303	69.2408	112.428	67.1887	65.2093	92.5432	132.197	129.722	52.0241	102.274	62.6437	33.7635	14.1174	98.8483	13.8965	45.281	21.7921	132.727	56.098	107.493	117.341	135.245	89.9512	90.4464	162.129	92.4201	81.4333	69.2651	175.416	75.3881	90.697	147.82	153.028	108.676	56.9213	72.5272	75.3363	157.676	148.336
AC139100.3	7.5213	6.9336	5.66635	8.54746	8.81583	2.32016	13.2553	8.35901	3.05038	9.52912	6.03675	25.815	7.99748	11.6917	19.9737	22.147	11.3019	11.7784	8.10905	9.98086	8.00214	2.78547	9.18965	8.29951	3.9124	4.32501	3.50604	35.0147	8.38748	6.90369	8.2156	4.1463	5.75258	6.35217	16.6208	6.17623	7.35597	24.8698	8.43225	13.6979	6.40873	2.92783	5.4243	13.0701	8.87211	7.88285	15.1898	2.35174	3.48174
AC141928.1	143.751	157.517	95.5213	141.479	122.835	141.103	113.292	147.381	120.801	175.865	194.116	134.086	234.04	189.669	221.109	232.537	218.013	214.844	234.079	204.926	205.916	129.697	210.144	138.374	78.927	196.81	236.146	148.346	171.016	178.66	178.665	181.927	145.706	240.266	183.095	130.374	161.052	357.145	209.714	190.157	161.598	171.849	136.269	102.756	94.9355	157.947	239.766	192.75	244.685
AC144652.1	230.813	339.164	250.557	176.725	196.232	237.406	323.695	237.29	298.218	380.454	195.267	232.605	263.632	164.312	316.098	292.583	303.676	337.45	219.796	249.962	211.895	267.389	295.368	225.182	66.5686	221.103	240.13	284.906	224.999	124.347	202.199	354.52	201.004	263.222	301.709	208.105	319.587	343.25	251.289	292.741	377.061	250.661	207.163	306.25	179.392	180.473	213.472	209.506	266.764
ACAA1	2508.91	2212.27	1987.86	1697.18	1995.94	2474.19	2486.93	2474.55	2155.11	2758.53	2566.53	2505.47	2087.98	1893.19	2054.25	2190.04	2511.63	2456.11	2643.22	1959.12	2272.58	2573.33	3231.5	2017.66	2332.3	2007.75	2349.24	2919.55	2351.86	2500.18	3126.44	2728.82	4307.89	3888.83	3563.14	4512.6	2249.08	2610	2697.04	2987.05	2856.05	3141.45	4387.04	2281.6	2992.17	4609.86	2682.9	3755.94	2398.42
ACAA2	1184.09	1589.15	848.516	802.965	884.624	1386.96	1080.48	1010.39	765.671	1138.91	643.255	1176.96	859.958	1106.48	1003.55	727.673	1084.45	1213.79	1211.67	656.996	866.261	734.484	854.985	759.708	765.708	996.259	1071.12	1327.76	952.64	725.463	615.153	1333.63	920.796	1534.52	809.736	1814.43	1236.01	1125.43	803.79	1077.25	1282.35	1198.81	1115.56	1181	1259.17	1224.49	1759.02	1931.15	1478.19
ACACA	423.491	155.507	69.548	206.254	140.946	67.3366	444.617	45.3957	284.659	447.894	61.0628	35.8833	282.125	70.8941	165.349	56.0915	17.8015	51.1691	305.798	447.991	184.536	219.954	567.526	381.841	421.786	75.7017	376.691	286.414	174.171	522.668	65.5005	67.2252	392.009	252.569	383.266	412.602	229.997	65.7043	115.945	88.654	696.08	376.899	414.351	340.477	78.6544	633.617	191.584	499.614	530.27
ACACB	250.192	323.918	472.736	440.782	362.466	334.219	402.902	417.062	484.62	313.139	523.143	353.732	470.99	462.452	444.179	388.013	607.52	370.647	494.534	499.677	360.534	422.279	358.596	466.296	359.288	320.505	182.776	376.385	187.389	245.248	208.603	403.202	247.958	352.508	437.218	247.176	349.248	512.135	336.432	91.5836	327.532	251.807	275.471	434.468	466.801	107.285	409.801	394.352	476.018
ACAD10	333.689	330.617	295.11	301.605	380.394	309.864	385.49	232.218	324.006	290.612	276.006	321.394	577.584	222.683	387.452	344.864	300.542	272.668	300.239	278.819	267.288	290.493	466.732	366.717	431.772	312.109	357.534	275.233	87.3942	294.297	282.365	250.11	464.54	437.54	320.231	349.891	281.791	220.803	384.495	249.306	323.287	321.86	389.444	432.793	337.728	403.85	530.882	399.243	477.577
ACAD8	1269.81	883.873	1314.89	1253.36	1159.7	1240.78	1321.2	1152.75	1196.88	865.879	1045.46	1022.2	1354.19	1139.5	949.857	1270.35	1161.68	1027.91	1083.75	1143.41	1042.15	784.84	912.951	866.492	961.17	898.488	1318.51	804.079	979.071	915.089	1062.88	785.603	727.783	667.231	701.452	591.231	692.854	784.823	538.171	646.98	509.836	1118.04	546.832	625.656	573.461	693.007	662.959	561.887	464.093
ACAD9	955.303	954.275	770.808	1103.25	834.621	840.245	836.3	740.164	1036.48	972.903	945.635	891.338	931.954	1060.94	878.996	1029.37	1074.73	1070.17	997.81	836.136	917.148	679.215	881.418	1028.97	1007.22	1017.9	1072.03	906.299	953.592	1020.53	958.057	908.526	1150.83	1181.59	1077.42	878.123	1101.56	764.032	1060.2	894.779	1051.14	1039.43	1039.39	900.203	981.561	1215.62	861.614	1052.02	1090.85
ACADL	27.7614	8.98533	6.18444	4.60573	28.3563	32.0105	2.74759	55.6436	31.4596	10.2822	5.86277	11.6209	8.50013	29.7569	7.42172	10.4417	8.23505	86.0935	8.25547	6.05123	5.15628	34.9913	4.55265	43.8733	9.01605	22.3024	4.41166	2.79811	7.82818	2.60716	5.70656	3.73584	3.88014	80.6608	6.74143	14.7021	41.6164	6.02612	79.0496	22.9572	41.6142	4.94024	14.0469	57.7923	6.539	5.91364	9.4387	31.6998	44.5105
ACADM	2205.48	2420.76	2540.31	2199.33	1878.63	2142.44	2393.09	2017.62	2546.64	1813.26	1887.77	3288.25	2040.06	2331.19	2661.35	2203.11	2307.96	1580.61	2629.13	2766.55	1722.69	1706.33	2455.67	2522.58	2675.23	2404.97	1777.24	4369.04	3139.01	2724.07	2878.88	2445	1441.08	1311.22	1700.44	1400.23	2530.69	2220.24	1196.09	2309.52	2799.69	1996.42	1304.22	2263.03	1940.5	1742.91	1694.05	1107.78	1319.78
ACADS	368.379	385.252	319.316	369.888	212.382	311.289	302.648	280.288	329.922	373.601	265.254	384.201	239.033	250.883	253.824	345.598	319.522	342.894	316.467	275.505	427.64	253.566	328.273	287.731	308.289	309.531	292.603	412.357	331.744	422.06	369.747	355.821	560.283	394.578	476.959	549.498	468.484	385.992	430.995	379.794	547.505	500.848	762.55	393.43	514.705	472.045	510.27	382.308	396.97
ACADSB	451.894	389.86	496.168	409.195	535.942	376.424	466.744	355.122	382.223	254.085	504.539	438.26	606.621	527.394	547.684	389.634	479.214	534.632	517.426	631.899	362.451	398.979	242.948	332.624	362.519	345.604	519.855	389.56	570.059	540.115	441.847	367.207	171.825	261.64	295.349	323.873	366.476	398.92	363.91	332.848	275.398	192.386	437.488	295.871	338.34	260.976	291.568	255.198	338.257
ACADVL	2541.14	2570.89	2340.5	2384.16	2533.45	3014.6	2118.97	2008.93	2423.83	2959.87	3393.24	1829.26	2096.56	2223.34	2310.01	2292.02	2141.46	2948.33	3299.47	2161.77	2502.82	1979.56	3834.6	2608.93	2292.24	2900.65	2832.67	2656.01	2260.4	2479.49	2775.96	2233.19	3014.1	2520.67	1773.74	3050	2157.34	2265.8	2475.85	2416.15	2194.32	3368.23	3117.98	2205.02	2756.24	2571.37	4303.05	2281.83	2398.93
ACAN	82.1251	66.075	96.3547	33.3468	67.8678	111.522	60.5193	123.937	120.614	159.67	154.26	76.0297	114.439	70.5816	197.389	158.645	83.8717	42.6267	57.7873	207.014	142.259	92.1091	223.751	62.7003	139.461	141.538	182.072	141.322	92.0413	124.463	93.2229	55.7652	140.427	159.213	35.3502	72.104	149.51	133.093	47.5516	114.896	121.907	146.009	60.3558	113.722	44.1879	28.3932	59.223	122.213	46.5457
ACAP1	2965.84	1936.55	3823.36	3188.95	3309.26	2477.09	3460.73	2070.5	3261.76	2029.96	2175.79	2261.73	2874.41	2028.36	2831.84	2705.44	2239.58	2029.03	2726.57	3171.81	2030.03	3021.5	2144.99	1658.24	2417.03	2782.44	2816.1	2307.61	3187.81	2834.75	2517.49	1912.76	1516.34	3050.15	2822.94	2377.93	2469.53	2949.2	1970.37	2406.92	1674.91	1319.5	2133.12	3235.12	3032.28	1832.93	2026.44	1681.16	2787.61
ACAP2	5950.6	6325.1	5300.4	6531.96	5722.1	5895.36	4921.65	5278.25	6513.8	5512.75	6502.22	8260.59	6428.88	6733.75	6495.43	6652.61	7098.4	7279.83	7115.83	6778.85	6547.08	7843.43	7043.64	7935.01	6495.2	5790.72	6521.13	6492.88	7648.14	8002.05	7874.14	8443.53	4515.81	3530.25	4826.68	3455.2	6727.99	4259.88	4420.26	3145.59	3342.32	5388.06	4834.58	3162.97	4085.89	4911.45	3192.33	3144.61	2710.81
ACAP3	1229.15	733.019	1149.68	1319.82	980.28	1221.5	1012.25	1076.69	1231.83	1265.32	1247.09	473.809	874.831	989.983	809.139	1035.79	1112.5	827.268	1091.13	1089.61	1022.96	815.495	1262.95	1242.49	1698.88	1469.6	895.066	642.283	951.926	845.57	978.67	743.042	973.388	1054.99	809.292	846.889	866.784	898.788	720.162	840.274	738.066	755.69	804.842	789.452	936.737	776.262	889.343	846.11	723.477
ACAT1	1548.65	1129.6	1338.01	1314.11	1639.86	1340.13	1324.94	1421.11	1255.63	1221.84	1049.66	1696.05	1195.62	1257.11	1456.47	1456.66	1583.68	1280.11	1103.82	1323.99	910.536	931.338	1283.49	1551.72	1279.64	1593.66	1218.31	2378.8	2091.71	1336.4	1649.29	1317.44	1735.94	1152.87	1235.53	1426.39	2075.1	1794.31	1094.53	1915.69	2103.35	1394.41	1421.79	1788.24	1628.51	1510.96	2594.5	1394.83	1518.55
ACAT2	849.879	793.155	712.18	700.79	712.639	734.932	832.087	631.631	661.357	559.851	604.988	886.596	862.792	707.876	639.996	658.66	749.994	656.172	616.208	721.361	539.149	604.022	420.619	491.593	567.567	537.706	798.641	888.85	619.744	665.598	625.294	646.606	551.04	959.756	788.696	755.268	559.499	556.064	800.172	1291.4	1162.02	398.575	612.851	1508.47	1095.92	848.849	1343.85	772.457	1074.94
ACBD3	1431.12	1500.65	1569.18	1561.27	1404.17	1596.66	1586.38	1615.14	1590.27	1333.32	1593.8	1472.45	1186.18	1763.1	1504.15	1384.41	1196.77	1086.77	1333.36	1468.41	1361.23	1601.21	1858.5	1474.65	2130.03	1794.44	1154.88	1698.03	1782.3	1625.12	1541.79	1884.9	1768.34	1537.01	1544.4	1620.21	1944.49	1379.73	2027.56	2069.13	1971.71	1557.67	1657.95	1856.38	1492.01	1650.76	1423.92	1320.11	1415.53
ACBD4	428.206	416.594	521.726	439.928	577.939	416.308	452.717	364.801	479.467	405.165	358.965	371.035	543.577	364.764	488.162	262.18	435.408	334.408	261.089	385.193	348.792	346.21	455.108	356.282	408.434	600.019	246.52	337.688	466.543	669.425	492.614	448.755	336.271	308.413	443.6	346.885	414.243	426.463	400.964	417.623	367.929	409.683	508.648	432.686	213.77	406.132	470.576	462.662	423.168
ACBD5	1851.8	1636.64	1532.43	1499.98	1715.23	1605.81	1702.15	1749.48	1679.2	1478.17	1642.52	1769.82	1635.39	1931.98	1899.15	2054.82	1600.9	1775.34	1937.57	1941.7	1598.51	1260.98	1768.06	1901.78	1649.03	1423.54	1946.4	1713.39	1723.53	1534.99	1786.37	1953.62	1460.41	1202.92	1455.71	1522.84	1592.52	1725.7	1228.47	1518.27	1193.84	1611.73	1329.07	1121.77	1191.23	1443.29	1156.54	1712.65	1288.14
ACBD6	792.551	795.82	861.596	903.298	914.581	596.454	672.995	554.923	881.827	707.123	822.491	1131.95	755.611	696.34	622.145	878.99	845.39	868.468	792.81	879.551	616.098	460.593	649.028	563.915	748.29	801.773	1024.15	904.162	794.884	775.097	741.601	546.737	756.625	736.598	757.858	670.516	515.912	819.556	721.653	803.8	672.18	517.378	867.601	612.055	730.619	741.399	883.756	709.294	813.336
ACCS	217.032	434.632	353.098	373.29	454.751	847.918	296.737	407.928	340.668	382.41	356.8	429.115	989.685	523.675	386.45	565.427	320.036	188.069	375.712	729.142	379.118	184.209	432.014	208.567	254.995	327.311	364.395	294.815	238.431	357.29	291.918	211.954	378.64	174.725	419.726	300.35	544.651	245.374	295.957	189.575	262.086	281.96	251.117	194.287	708.601	976.293	252.963	271.338	406.259
ACD	556.691	706.011	866.901	649.814	671.415	727.607	705.78	699.923	589.414	620.988	648.097	904.402	584.996	553.916	409.47	624.05	551.123	742.257	552.548	788.387	520.191	608.21	659.377	449.152	615.766	576.523	660.537	887.459	814.619	750.596	706.219	628.362	1001.39	1122	893.992	933.64	576.075	823.118	1032.55	954.819	673.415	605.755	976.657	1102.86	839.453	932.88	859.827	747.87	906.986
ACE	31.4825	45.2223	14.0723	23.073	49.1213	37.2652	7.35936	20.6565	22.2763	52.3256	35.3604	171.658	35.1817	26.9677	80.6431	56.0058	14.5276	53.5088	47.8175	22.4042	19.7588	36.0767	21.2699	25.7437	12.4143	11.1942	30.4146	24.9592	11.1769	8.90266	48.3191	13.3274	44.3126	51.0885	12.082	31.9404	10.4817	96.6972	15.3651	28.1603	28.061	5.95683	30.0937	6.47529	6.4639	15.2432	6.23963	21.9597	59.1715
ACE2	27.2193	77.3194	15.8693	88.3021	97.3214	5.48295	66.4435	51.6262	42.6067	61.8969	74.9203	54.7691	165.362	27.7296	66.439	49.7393	25.9062	51.2817	34.1385	18.6082	91.2849	58.948	14.3692	100.201	45.9667	39.0167	35.641	46.1267	66.0258	73.2158	74.0921	16.4185	62.3716	8.56181	35.2764	8.00913	12.7695	44.5615	67.3607	50.9754	76.6982	32.356	48.3453	152.902	102.129	10.7937	32.5913	4.47995	16.8905
ACER1	13.0002	19.503	24.0581	7.76662	27.5644	12.4273	17.5805	19.8219	15.4623	13.8338	10.8887	9.5387	11.5979	20.7009	13.49	10.0316	12.7946	11.4847	13.0607	7.85207	84.1153	16.8408	16.8942	9.39636	17.2236	73.1569	23.3455	25.2764	10.2124	13.125	22.297	7.83958	11.7051	23.4916	17.4756	9.02949	74.2621	18.1997	16.7173	10.8813	7.15236	15.8023	18.2868	9.61188	12.7792	9.29391	19.4382	20.2108	8.0131
ACER3	960.91	1097.35	741.311	929.4	1157.7	994.95	732.477	1286.2	998.146	1537.84	1276.86	1038.84	962.609	1055.48	1177.33	1247.99	1344.92	1164.09	1417.39	779.683	1385.4	650.747	1857.09	1243.29	1415.35	867.352	916.133	801.5	993.101	1103.53	1362.66	1210.03	1075.15	735.785	1025.46	1103.9	1274.24	728.616	957.304	632.409	873.414	1486.71	1236.74	813.327	903.336	1405.96	871.116	1227.34	1057.44
ACHE	128.655	165.537	77.4343	147.085	141.579	16.5313	55.7688	119.56	116.137	130.811	223.173	267.415	184.094	131.421	185.892	132.534	155.463	209.909	163.011	221.322	63.1527	88.3068	64.2036	70.7779	107.188	106.779	113.526	92.9748	106.876	61.1393	104.274	96.9354	171.882	46.5525	97.7191	68.8835	184.62	143.279	128.699	191.021	143.981	35.113	117.934	130.625	77.8954	139.997	204.541	324.613	125.631
ACIN1	1030.35	791.843	977.32	1020.54	978.69	897.333	998.29	886.745	889.552	903.397	1185.37	750.231	940.548	1001.71	995	1085.61	931.07	709.911	1261.26	1222.66	961.32	1333.51	1098.49	1061.75	1587.62	1143.03	1127.14	1234.66	1266.58	958.759	1152.6	1015.19	628.819	902.108	736.906	683.554	777.787	801.845	806.168	1039.28	831.566	645.012	864.86	679.016	921.172	710.968	1025.97	833.85	733.081
ACKR1	10.9	14.576	7.22938	14.0637	17.2331	8.45204	8.23056	14.2712	15.0754	7.77455	23.1735	13.4858	11.2481	13.4776	12.9458	18.093	9.55784	14.1502	28.467	16.1863	8.40256	13.5076	13.2511	8.32761	6.53633	14.261	9.72688	8.6418	17.2733	9.65717	9.50608	15.2066	9.06871	11.6884	21.6794	11.4103	13.4497	15.4398	14.2976	9.12466	10.2683	13.9564	10.5072	18.535	14.7562	9.38624	10.7575	65.7317	12.5221
ACKR2	71.8902	131.103	114.361	112.882	96.2222	113.428	28.196	116.766	118.825	103.175	116.023	13.4451	142.992	157.502	210.035	227.348	149.692	227.125	161.431	189.04	199.704	18.166	152.113	150.604	117.709	113.027	108.77	92.8279	148.547	85.6312	168.153	154.888	134.7	60.4077	92.3549	25.0447	60.0634	173.833	105.48	124.775	92.723	93.0102	107.611	22.0173	35.2163	29.3423	70.2677	101.001	44.4409
ACKR3	280.791	341.393	237.342	200.275	319.967	287.564	380.369	209.831	260.783	173.316	232.804	174.13	169.231	319.799	222.117	305.756	192.8	182.018	256.205	163.374	245.312	248.288	365.392	232.869	145.651	256.455	132.633	168.145	288.785	261.095	237.316	226.877	76.5933	91.19	167.685	92.5435	175.226	268.127	168.541	156.271	138.84	66.3072	92.4161	151.691	200.839	157.859	314.04	84.4336	275.561
ACKR4	52.4123	88.8902	47.2606	51.2865	51.003	22.1426	12.8666	34.5588	35.2916	7.31263	38.5147	59.2463	81.8285	25.0851	75.913	72.099	51.8613	7.83563	34.5641	66.7451	44.0369	33.5823	54.4402	67.8216	2.72471	21.786	48.633	75.9216	34.609	42.1126	50.3799	39.353	15.8991	53.7386	19.3058	30.1982	51.911	78.164	8.19029	78.74	1.27355	6.63974	2.93616	13.2577	6.89078	41.0385	44.5562	36.9423	38.2182
ACLY	3755.59	4190.8	3432.91	3249.88	3943.54	3699.31	3173.93	3755.26	3489.88	3730.42	3862.91	4213.39	3756.82	4297.46	3775.14	4040.56	3742.61	3669.62	4202.48	4736.17	3644.4	4036.79	4552.25	4348.99	4478.94	3432.79	4858.91	4195.48	4501.05	3969.55	3922.66	4872.6	3020.86	3036.48	3425.83	3080.55	4387.73	3802.95	2973.42	3294.9	3468.17	4174.47	3177.97	3243.11	4169.22	3516.86	3308.15	3315.36	3246.64
ACMSD	78.1088	85.828	45.9932	72.5255	59.4724	69.5887	2.59493	23.3079	35.5008	6.31173	23.1925	88.8105	57.8096	28.664	97.9452	89.5743	60.2728	110.683	65.8239	44.2409	54.9562	37.2593	6.07902	81.0618	2.76941	94.5706	59.3057	48.8508	36.6324	39.0467	46.2817	41.396	26.2687	21.8241	52.8475	59.2767	42.9298	69.8257	37.9622	2.90378	7.50512	43.1824	27.5344	27.2903	14.0467	33.6384	17.2083	11.5489	8.64918
ACN9	343.86	349.124	440.751	446.277	547.546	582.875	532.085	300.898	465.591	365.163	502.038	826.115	513.797	569.369	574.611	496.007	507.67	570.094	388.388	801.681	315.025	376.752	441.218	451.064	582.226	352.95	495.583	662.79	620.066	628.562	571.288	515.819	207.187	174.166	268.578	166.77	398.144	500.295	177.374	215.528	182.377	204.614	306.919	290.325	176.817	252.795	188.681	174.179	241.991
ACO1	440.555	392.717	322.567	462.529	404.17	475.148	385.108	401.397	403.876	435.277	538.626	497.899	379.906	478.263	460.536	392.857	542.57	413.392	500.76	410.74	479.021	312.829	435.725	386.601	406.952	294.132	264.344	257.008	493.68	573.182	487.258	341.212	420.57	344.166	480.947	412.716	295.347	297.915	509.125	403.269	358.474	397.516	471.692	356.404	331.666	429.06	483.405	491.779	431.109
ACO2	2290.23	2488.49	1689.35	2080.98	1734.66	1875.48	2233.13	1786.93	1951.31	2186.57	1978.33	1841.22	1196.11	1782.13	1193.86	1563.47	1892.53	1272.26	1657.91	1421.99	1536.02	821.732	2235.43	2370.98	2606.41	2257.9	1627.28	2259.52	1900.41	2002.68	1733.19	2046.69	3586.09	3477.34	2724.78	3512.69	2481.49	2191.43	2681.64	3456.77	3326.12	3468.18	3417.6	3288.72	3657.02	3121.53	4120.27	3460.5	3051.99
ACOT11	10.7964	9.42322	11.7364	25.6886	39.358	37.2661	5.88295	44.904	28.2436	34.9379	10.3478	9.16102	68.1585	71.5613	51.8384	28.6402	107.928	13.3688	96.1126	45.0638	32.6154	16.7955	17.0076	13.7363	66.0571	8.84618	20.8233	12.1987	15.9053	144.544	11.5428	22.125	56.3015	28.8652	9.29184	10.2068	42.3247	67.2063	18.5259	36.0771	40.2518	10.46	57.0843	18.8385	76.1618	15.1764	17.9393	53.3675	23.9885
ACOT12	11.9053	48.8159	5.92955	41.2146	5.04391	20.5031	17.067	8.3135	31.1148	56.945	8.27567	21.2826	67.6154	5.1753	9.78774	8.29712	7.98054	7.05927	15.8574	23.1528	10.5402	5.11462	45.2173	42.4258	5.91296	32.7824	4.26187	8.025	6.98689	5.39622	31.5125	35.5921	4.8469	78.8989	5.36683	3.07264	17.9421	13.4886	24.3196	13.0388	5.29907	9.1624	12.2104	33.583	32.8054	10.9044	7.73209	9.13617	6.1192
ACOT13	591.63	516.253	526.041	533.924	450.528	575.867	410.912	491.615	499.046	576.407	580.547	590.362	628.098	600.042	562.215	570.906	464.433	418.422	468.034	535.122	520.28	581.024	619.746	667.237	582.525	662.996	431.975	622.56	564.957	503.827	734.819	690.972	786.04	657.647	588.132	860.229	515.707	534.322	682.767	878.329	711.072	724.093	572.783	779.554	737.463	803.973	943.93	750.176	559.575
ACOT4	100.96	129.156	140.962	164.124	170.056	162.798	101.626	179.47	85.4449	163.059	95.6769	297.96	124.656	162.634	150.403	156.755	63.9521	141.105	82.7477	177.196	63.8313	117.502	114.221	118.114	88.9977	84.5963	86.6733	121.186	127.988	73.7855	100.998	144.884	85.1948	120.04	102.602	143.65	117.288	84.6478	114.331	183.996	127.989	50.7036	67.4041	95.4881	187.389	129.378	136.152	104.731	183.262
ACOT6	6.02899	6.47135	5.25954	6.00657	7.5486	15.7815	2.12679	41.4333	2.99139	9.12192	6.96937	11.2157	7.49411	10.507	7.38772	10.6584	12.1469	8.17779	10.2032	4.56062	5.27958	6.46106	5.92227	8.74818	8.94221	5.47168	13.208	9.1166	4.25803	10.1442	4.85391	5.85346	5.93476	6.90337	8.09521	13.3244	3.99258	3.88393	4.93184	17.141	7.09582	7.5835	31.7451	11.4915	12.1021	4.48737	12.1055	9.21312	17.4276
ACOT7	331.17	390.334	408.805	437.316	307.602	347.045	317.643	446.434	393.974	478.452	298.714	373.747	308.246	411.083	333.762	259.403	377.469	291.332	331.844	413.263	235.807	279.621	543.104	363.649	262.096	295.931	302.442	698.639	229.889	248.395	271.503	413.954	348.392	619.817	540.58	482.015	478.989	793.178	470.425	660.467	688.348	479.604	437.023	777.475	642.007	547.362	943.908	653.628	522.797
ACOT8	369.694	458.473	428.096	657.618	418.257	524.325	525.169	450.542	671.546	486.747	598.752	683.944	533.29	531.734	447.356	498.317	456.874	447.459	450.073	519.35	398.717	383.401	328.868	453.643	642.135	406.479	443.623	461.061	467.092	452.56	503.478	465.094	818.989	626.344	792.064	763.095	560.763	620.67	563.115	786.484	731.409	601.283	839.702	745.799	628.283	623.627	525.964	1008.37	634.225
ACOT9	978.62	1098.72	966.103	939.569	1109.82	1113.62	869.011	1142.3	1064.07	1072.75	1212.24	953.014	1529.06	1281.47	970.651	1086.25	1112.38	1068.29	1120.53	1413.72	1151.43	1035.96	921.788	1251.46	1162.39	944.835	986.572	1490.94	1017.96	1150.87	1351.55	1624.2	1844.31	1682.98	1557.21	1756.38	1349.62	1595.97	1405.74	1601.17	1812.81	1476.87	1424.18	1679.03	1487.71	2047.51	1679.65	1619.34	1336.67
ACOX1	862.637	1034.9	648.636	697.47	679.807	995.037	876.77	821.717	689.317	837.877	876.149	643.414	679.912	945.812	639.653	785.273	689.571	432.5	802.562	685.011	1157.05	940.111	902.676	1027.44	1050.04	958.204	786.543	427.692	688.767	1088.1	847.333	752.208	887.076	523.601	787.674	857.427	618.188	827.476	763.218	577.365	530.078	1208.18	907.708	536.811	766.588	1337.06	832.769	1134.3	725.282
ACOX2	109.908	150.259	39.8882	156.34	48.6422	61.4131	46.6974	107.749	110.157	122.327	39.4855	109.291	131.329	60.8172	125.196	104.809	109.612	156.912	149.114	119.073	116.35	92.6931	72.7695	124.959	154.229	148.231	66.6813	103.165	142.166	96.1599	98.383	164.919	104.196	64.1033	35.0701	74.7563	188.181	24.269	52.7987	72.1744	13.2481	103.318	168.875	178.636	169.659	193.295	56.0489	70.315	108.266
ACOX3	472.256	319.961	338.252	379.146	323.147	337.89	272.378	284.238	280.452	279.307	378.694	422.017	448.8	281.785	466.386	331.113	326.617	247.401	324.234	305.606	352.744	393.246	421.385	477.431	514.016	281.167	323.617	298.364	372.762	371.188	340.139	388.619	407.892	277.192	257.556	322.593	244.163	242.819	215.147	336.419	430.387	348.758	463.872	171.434	283.812	386.578	343.501	522.995	258.671
ACOXL	83.5728	79.4293	74.7061	55.4146	144.701	100.259	39.6798	114.973	35.321	88.1051	66.7049	94.4059	155.193	122.445	135.958	118.221	94.0928	124.682	97.7429	88.9021	94.1886	72.3378	105.736	55.4881	132.562	82.7979	97.4289	122.907	101.225	59.7115	77.8282	99.977	142.125	82.484	96.3346	128.752	52.2734	64.1062	74.4096	224.165	197.569	24.1466	17.3014	85.7574	62.8	96.8342	112.941	115.223	77.5581
ACP1	1252.13	1681.68	1607.6	1151.45	1342.81	1558.81	1522.97	635.329	665.96	1197.01	735.998	2304.22	1160.97	1264.79	913.213	1270.8	1233.17	1381.18	999.365	1375.28	842.889	740.796	698.801	829.765	787.364	1106.97	731.966	1537.12	1206.44	829.322	1217.99	1075.69	1639.49	1991.51	1555.93	1911.29	1365.95	1323.96	1396.6	1571.41	1967.84	1141.92	1230.82	1830.04	1333.28	1396.85	1406.96	2085.15	2090.96
ACP2	823.622	850.665	879.989	1029.22	1043.45	1050.69	977.754	995.909	1158.34	1029.73	839.961	830.218	1099.49	1188.9	1014.23	1102.64	885.854	851.846	898.916	919.413	932.824	524.525	914.993	1360.64	871.172	935.752	846.45	781.116	1086.47	835.278	1074.33	984.58	1098.3	1285.33	775.412	1332.77	795.895	653.474	1066.73	1137.39	1110.36	1070.6	1136.9	647.741	1373.49	1156.38	1058.05	1282.26	945.165
ACP5	843.133	720.396	811.32	560.086	662.067	820.026	667.732	852.073	764.01	459.921	721.456	1031.77	1049.74	703.199	926.124	530.275	889.12	781.315	961.207	595.731	701.512	411.717	591.68	594.714	1041.73	797.938	548.401	1060.5	682.139	884.312	653.966	663.04	1294.11	835.607	1204.01	800.501	693.142	977.736	844.688	1559.72	1050.48	734.027	1246.6	1424.67	1139.54	1134.27	1263.47	1108.83	1362
ACP6	736.739	609.591	566.807	610.793	693.699	454.758	596.869	353.219	562.92	581.627	419.111	446.055	464.037	349.653	449.184	499.821	535.346	633.453	408.311	433.154	578.254	413.195	451.979	465.73	439.57	579.879	529.594	395.669	395.36	554.627	501.992	427.676	280.831	465.879	645.799	458.966	265.872	797.15	382.904	578.07	556.461	704.532	248.291	846.625	647.288	477.02	619.663	311.952	665.729
ACPP	501.524	720.79	371.547	448.122	553.18	425.985	261.527	451.505	667.193	738.444	945.48	590.276	347.173	381.717	527.485	458.494	560.105	813.635	1056.28	380.947	879.095	362.121	805.517	1292.05	849.148	1097	797.524	438.358	580.522	959.782	856.199	893.709	635.485	217.504	427.103	663.206	1107.37	931.093	465.986	408.518	517.036	829.535	480.368	312.291	328.089	763.427	508.765	289.949	329.916
ACPT	169.269	298.722	220.421	278.651	259.485	241.386	149.089	153.269	267.729	326.625	292.243	363.504	334.989	302.582	300.956	296.71	236.603	371.148	399.418	305.009	299.402	223.531	206.484	305.787	219.886	235.373	218.358	261.455	220.729	155.079	190.333	134.458	139.783	315.577	184.398	208.963	124.374	190.234	326.109	253.384	214.948	283.44	249.871	295.514	210.333	248.45	255.371	340.04	363.607
ACR	10.7368	10.875	19.8701	29.1792	21.5488	29.9662	31.3501	16.0695	9.12091	17.707	11.5795	9.39628	25.1329	15.3561	9.79356	8.14829	9.3578	22.7673	17.2698	11.2766	20.8835	41.6386	11.2208	11.1724	10.3059	9.05126	7.4694	13.1473	14.8514	7.91294	14.5217	7.80833	9.05794	25.2544	41.9843	10.0959	14.0124	20.7141	27.0091	24.5264	146.565	12.4751	17.6452	14.7187	13.4567	8.51855	8.42732	80.4868	7.89341
ACRBP	2582.85	5687.54	5135.53	2331.56	1923.88	3459.45	3635.94	3956.43	4549.5	8694.17	2110.38	2495.13	1052.85	2162.97	1798.93	1682.81	2223.65	1442.56	3099.28	3626.06	2375.07	3040.2	7239.33	4749.84	1068.12	2493.7	852.47	2656.78	622.371	1742.47	2444.85	2911.76	4657.98	8608.93	1082.73	5898.6	7369.45	7941.39	5189.9	921.973	3502.32	13240	3267.55	4233.35	3527.12	5233.24	4100.07	3734.06	2428.41
ACRC	391.544	366.187	393.194	496.644	400.43	388.84	502.743	387.803	436.829	266.488	474.479	354.511	518.51	463.179	373.017	502.146	455.837	423.926	435.145	512.942	404.804	449.54	359.426	358.511	411.269	438.249	500.613	432.976	380.175	387.688	408.781	375.775	228.337	171.446	282.204	326.487	319.385	331.617	262.025	428.885	277.012	313.764	236.309	269.163	316.058	272.865	215.51	338.769	306.355
ACRV1	140.095	143.056	117.854	159.878	134.147	138.624	119.29	104.942	134.43	135.489	204.247	202.62	238.531	163.645	214.767	174.745	226.606	315.426	132.062	214.492	217.641	172.673	94.4223	119.235	147.626	155.099	231.312	202.068	145.871	127.262	118.666	136.451	160.36	111.371	76.5998	152.785	139.359	235.522	170.746	124.929	180.449	132.936	100.752	166.911	166.292	122.516	87.5843	205.488	131.952
ACSBG1	128.323	223.007	214.7	121.385	85.1089	126.673	137.971	147.85	174.376	594.703	60.97	131.566	21.1567	24.9441	72.2475	80.5309	51.2149	68.8479	114.717	163.614	144.149	101.645	646.01	145.553	89.1751	123.816	27.052	148.285	34.3427	26.6176	82.2795	22.3032	129.238	130.219	24.5358	162.033	107.388	223.429	190.17	5.91733	144.097	185.471	160.116	230.067	74.4088	294.67	190.334	104.71	128.463
ACSBG2	89.164	115.789	180.233	144.962	143.997	122.954	112.153	81.8219	159.062	136.74	135.725	112.279	178.498	182.133	232.744	216.52	165.017	191.401	129.884	195.689	137.414	125.457	147.581	153.003	103.549	136.06	113.546	141.076	133.385	141.872	168.325	98.2108	118.851	48.2682	121.756	53.7688	86.4139	137.702	72.5822	124.922	74.1577	68.8061	41.7184	48.6948	57.9693	134.75	136.004	33.0034	12.9519
ACSF2	269.884	295.843	215.255	181.194	243.924	219.357	193.466	234.64	172.97	245.552	311.739	317.688	247.148	288.201	192.531	301.639	145.785	211.023	263.335	208.888	243.035	223.606	169.664	114.178	245.105	131.932	206.868	176.187	95.3594	216.044	297.56	191.152	214.012	187.192	171.34	247.677	191.092	176.928	283.267	256.534	251.832	113.454	139.483	210.871	227.831	183.413	239.784	155.736	212.792
ACSF3	225.39	346.944	386.466	360.143	286.744	247.56	348.119	301.611	274.32	304.303	212.899	371.642	264.622	27.4992	199.371	278.385	270.491	170.734	292.765	305.191	284.156	171.797	229.802	286.18	354.864	233.129	148.862	293.771	281.919	210.814	362.544	316.545	334.648	362.711	309.582	444.656	225.622	220.285	279.99	294.274	289.721	336.086	320.15	428.263	468.447	136.707	447.289	294.204	263.932
ACSL1	2485.56	3429.83	1899.39	2674.97	2166.8	3299.86	2150.65	4871.32	3081.17	4611.64	4136.91	4368.8	2473.13	4363.27	4059.53	4523.26	3917.12	3627.46	4910.11	3054.32	5935.09	18537.1	13321	11774.3	5583.29	9918.21	6875.29	8444.48	3482.95	7217.36	5854.23	14779.5	9212.25	3348.58	5092.17	4445.54	9160.56	10337.3	4978.03	1664.86	4375.56	8804.48	6508.46	6204.26	3477.71	5411.59	4383.53	6095.27	2024.46
ACSL3	924.997	975.171	1005.97	825.841	700.619	863.515	754.238	834.572	966.276	729.37	1120.66	1277.1	1193.59	1041.77	1100.68	1246.36	1203.47	749.046	1143.08	1224.35	964.739	979.573	1214.32	1055.92	745.643	1143.12	1069.81	973.216	1129.66	1041.47	1095.48	1143.16	1113.14	1024.04	1206.83	1033.96	982.334	834.224	889.788	1102.52	1322.28	683.855	924.296	1022.6	751.366	866.346	1040.8	948.849	842.468
ACSL4	1018.69	1052.54	850.492	1316.14	965.718	1215.52	721.908	1354.81	1134.18	1576.17	1798.45	1809.86	987.754	1377.49	1430.14	1172.47	1001.46	993.415	1509.22	988.815	1775.62	2101.14	2101.92	2363.72	1417.35	1316.57	1020.01	1608.27	2004.59	1650.08	2353.28	2921.56	495.535	365.002	455.437	355.378	1640.02	985.321	413.396	300.77	507.468	495.451	518.835	351.543	307.371	604.086	328.159	361.879	211.758
ACSL5	1424.76	1854.93	1422.52	1503.45	1434.07	1512.96	1519.34	1545.44	1437.5	1729.53	1213.39	1322.06	1668.83	1506.8	1347.88	1426.13	1504.3	1302.83	1136.82	1298.63	1327.49	955.866	1142.46	1205.73	1203.8	1191.44	1199.79	1628.32	1378.9	1248.45	1521.42	1629.82	1348.83	1580.99	1391.27	1557.63	1417.58	1186.86	1387.47	1543.19	1850.56	1081.25	1454.15	1936.43	1636.6	1491.66	1538.64	1573.27	1872.54
ACSL6	455.781	339.582	581.622	595.568	500.128	406.012	604.993	241.792	447.513	228.267	349.158	362.071	691.221	235.658	584.783	673.109	507.706	396.595	514.24	549.983	326.246	376.656	189.374	360.932	271.772	486.062	370.837	410.228	507.097	677.399	551.596	184.731	116.299	160.584	208.953	131.984	429.406	380.118	185.827	296.011	193.788	60.0269	143.851	358.787	200.249	157.465	204.83	138.404	274.333
ACSM1	16.6547	15.7207	12.095	13.1326	9.46304	5.98865	51.7581	13.3428	16.1973	58.4204	20.5751	16.2616	20.1446	11.5184	31.2814	19.6716	29.5877	12.8618	12.9537	15.437	14.8659	9.85679	16.0767	16.4231	39.6885	14.1333	96.1642	11.1701	13.6666	18.1743	51.2556	14.8153	40.6943	22.8006	10.9297	13.1724	22.1602	9.30205	17.1064	42.2077	44.1051	9.8515	8.57045	9.7596	9.73791	30.2198	34.2512	17.9901	19.1014
ACSM2A	14.8199	21.5478	2.41542	11.0036	4.03154	10.144	1.4743	42.6968	3.25423	19.2016	5.92513	3.28614	1.6223	10.0115	2.84608	5.95133	6.98772	2.2799	11.5115	1.67206	2.28825	1.56095	29.601	21.5513	5.62586	23.8095	3.82992	4.02994	8.21334	1.70963	10.4587	1.77933	2.04045	3.63612	10.806	1.64623	4.34157	6.57824	6.05571	6.43976	2.20095	26.8324	3.011	41.303	5.05434	30.4058	2.99053	46.5885	3.4693
ACSM2B	13.3215	123.636	15.1304	8.50222	6.99946	23.6928	34.7421	8.57061	17.4252	43.1863	25.7707	22.254	48.057	64.6024	24.0479	67.3518	68.9274	79.1224	66.0628	12.7465	68.4704	4.44077	9.91809	8.94521	58.2529	8.72272	44.0168	44.1661	25.8222	13.2452	12.6359	53.6134	9.4519	74.1581	9.31042	52.4871	49.4822	15.5148	8.36173	37.1586	5.75882	74.2934	11.9868	66.3408	9.96399	12.546	9.66362	9.08255	10.3588
ACSM3	154.814	181.533	166.715	180.619	172.64	149.765	188.996	110.073	174.378	138.228	163.259	330.153	250.709	216.107	214.909	197.968	195.131	230.283	189.837	161.271	140.496	132.692	53.348	57.9695	90.2845	118.266	177.593	111.366	179.762	179.071	125.717	147.397	67.5046	108.08	174.191	132.402	140.944	167.884	84.2849	201.406	121.643	55.3192	124.447	89.5175	114.139	152.978	102.299	111.867	127.745
ACSM5	65.7185	130.578	157.616	93.4748	65.0065	106.287	57.7873	130.308	66.8176	88.9708	171.826	149.283	162.145	143.582	185.555	190.491	137.631	213.898	114.427	87.9826	119.741	109.192	104.233	115.385	99.0848	119.872	121.412	79.5437	77.3205	100.398	109.355	157.389	103.085	24.3795	115.492	111.379	147.15	172.743	148.696	151.596	63.8564	115.655	162.34	143.024	30.8231	155.14	129.486	181.745	158.53
ACSS1	986.72	727.512	920.225	791.636	1230.76	1185.34	962.824	1008.58	947.423	799.31	1052.39	632.533	1043.97	1116.51	1061.38	830.184	841.883	664.903	928.083	1099.65	765.488	923.461	935.015	606.844	834.397	881.078	826.217	1052.21	867.725	680.159	759.359	886.505	664.164	955.464	854.149	720.022	598.361	649.845	744.518	1102.4	1168.14	706.663	822.458	850.373	822.471	696.906	1094.04	700.786	766.686
ACSS2	791.038	853.241	853.115	911.247	786.384	896.464	844.894	926.139	900.074	1126.87	1211.94	986.462	845.947	1053.36	997.426	809.476	891.397	1138.34	1064.4	878.49	1118.11	871.939	1454.51	1073.17	1109.64	1007.92	1106.98	530.089	1006.32	1284.43	1045.69	1155.48	1351.23	999.065	873.363	1047.59	1056.33	805.231	842.955	979.788	827.027	1034.21	1437.94	871.559	908.402	1103.71	840.509	1235.21	828.093
ACSS3	79.1158	113.265	96.4832	94.0433	65.0247	93.0151	49.0436	69.7255	112.421	129.092	108.755	129.066	87.2859	75.7878	98.0979	175.218	125.493	135.595	71.2159	52.3514	104.746	60.511	49.9908	99.1293	108.445	109.937	62.1668	99.1176	73.0969	102.386	132.165	102.513	69.5744	6.15547	113.576	61.7084	110.351	62.4791	95.7523	156.796	66.5409	128.147	17.8764	82.5271	123.73	58.2599	83.1878	23.9748	75.4738
ACTA1	50.2632	25.1811	56.8414	15.4875	68.2333	65.214	70.4391	20.4701	23.5325	11.7175	44.593	106	32.9554	32.2627	23.1045	98.4893	39.6356	49.9004	49.2621	54.8009	69.0975	36.0246	16.514	66.188	58.2412	23.9832	18.0587	53.4203	78.5709	47.6956	34.9702	78.4662	29.6759	16.9464	13.3691	75.9428	59.9996	87.53	68.9122	62.4734	59.2073	94.5985	66.3019	42.5591	74.5808	36.9717	60.1152	24.0682	110.905
ACTA2	721.958	521.325	387.043	470.68	430.464	326.373	354.121	521.804	528.172	860.553	847.781	441.346	322.779	481.409	419.276	486.919	340.518	635.287	547.652	464.902	467.933	840.365	339.571	457.608	637.228	480.128	776.769	465.377	392.131	716.358	586.197	861.871	299.096	667.27	513.785	521.105	646.624	436.222	527.766	258.207	410.714	1032.13	664.047	296.275	746.56	206.905	368.57	569.408	277.792
ACTA2-AS1	70.8492	73.6757	79.3125	80.6011	85.8922	62.369	49.4857	72.6647	103.233	148.07	40.7649	95.7087	74.9779	81.7503	114.395	122.561	81.2506	76.7978	152.851	66.7372	114.75	78.0856	75.1971	96.9246	93.454	118.949	147.005	86.7522	77.356	70.434	44.3772	47.2908	50.0448	61.9205	102.585	11.9744	74.3837	64.3474	122.419	73.3883	13.0803	98.7123	71.9365	121.095	103.302	81.3424	93.3813	96.4132	11.5369
ACTB	48542.4	64240.2	48697.5	39956.9	44535	48202.7	52491.7	56604.4	42294.2	45970.4	45785.1	69524.4	44840.5	49168.4	44068.7	34687.2	38285.5	54498.2	51342.4	41182.2	46952.5	54443.8	71359.8	41613.5	60414.8	46258	47438.7	39334.7	34192.5	42512.8	32269.2	28621.7	79228.4	101900	85403.1	90803.4	46421.5	46408.7	66989.2	68617	73828.4	76289.6	104924	102753	93158.1	96037.9	75103.3	77843.7	102431
ACTB /// ACTG1	31572.2	42396.9	37072.9	28674.4	33153.2	33159.2	38698.9	36520	29416.8	33404	38894.8	58678.3	35650.9	41443.5	35951.4	30727.6	31628.7	43132.7	41635.8	34391.3	33042.1	32820.6	44246.1	32323.7	39705.1	34223.7	40775.7	34439.8	26868.9	31332.2	24253.3	25466.9	48586.8	57021.7	55210.7	55988.7	38304.6	35291.7	45333.1	50875.1	53841.1	56350.4	64417.3	62702.7	60226.9	63483.9	53923.5	51721.3	64891.5
ACTC1	234.7	319.428	230.198	212.508	343.299	224.758	219.37	182.132	235.733	374.3	354.209	299.827	320.981	212.315	469.246	279.04	335.598	511.303	330.599	344.25	373.112	269.941	453.505	329.388	242.124	349.445	301.968	352.038	327.158	403.529	400.7	354.507	395.427	332.4	269.003	48.1336	237.811	313.286	276.749	459.112	218.655	357.692	280.22	285.123	321.538	261.939	289.039	220.249	355.86
ACTG2	84.3606	102.931	94.0578	103.36	27.0689	32.7534	94.0844	15.5337	21.9901	51.852	58.1831	25.8796	76.9221	121.706	109.152	121.339	33.1654	220.071	53.1001	123.92	203.668	142.398	10.8962	77.1625	17.0556	27.875	133.396	50.7271	56.7825	72.0785	16.2448	26.5409	99.2351	112.475	187.689	7.42202	154.22	151.846	123.485	156.208	169.604	185.134	36.4725	205.691	59.1589	75.5072	130.258	111.793	23.4802
ACTL10	108.886	162.387	149.952	192.513	153.121	138.844	175.241	186.59	106.618	28.4474	167.665	193.834	184.056	158.388	59.0155	22.3567	206.82	212.681	231.111	129.733	108.282	157.372	168.081	135.088	161.113	216.319	194.339	257.127	142.814	230.492	245.39	203.438	166.667	280.258	163.607	205.104	170.035	103.346	202.296	195.958	198.919	141.955	161.431	180.565	224.552	172.453	307.61	261.85	249.391
ACTL6A	1132.5	978.595	1076.89	1306.72	1123.65	1214.06	1394.95	1120.85	1348.07	1073.89	1408.92	1417.44	1647.42	1266.51	1581.36	1509.51	1515.02	1101.15	1373.43	1644.6	1078.69	982.393	1162.02	1263.34	1249.84	1147.58	960.978	1662.89	1580.05	1491.8	1524.02	1202.85	540.071	403.245	613.772	572.916	1135.73	815.992	629.034	701.267	667.702	718.614	533.317	759.104	887.258	593.224	470.253	400.722	576.39
ACTL6B	4.45277	4.12793	9.15051	4.92483	3.07344	3.4383	8.06749	9.90954	3.73914	7.20444	3.18674	3.98763	6.30241	10.9424	4.87572	11.2607	7.48219	5.10649	11.2587	7.21109	5.3397	8.07146	2.93963	6.05538	4.0516	10.8964	7.75344	7.18359	8.45632	5.98589	5.36575	4.32372	12.81	5.31257	6.78333	10.0056	6.64552	7.56204	17.3977	13.531	7.84831	4.33722	6.76747	10.8685	5.48376	8.00323	3.80507	7.7022	19.8214
ACTL7A	9.26805	13.7031	8.64268	8.22104	8.71474	9.98352	14.9134	4.67888	7.38427	6.07628	9.72498	9.14494	6.40801	6.70391	9.73055	19.8065	6.35392	10.3044	17.4693	31.0215	7.03797	6.77333	21.9943	4.99218	14.5819	9.69127	6.54669	16.0475	6.75621	7.22903	7.99507	7.99969	7.15932	8.97519	13.4671	15.506	5.81885	6.32956	16.3843	14.9747	10.2265	6.98662	7.30652	12.1913	7.96452	9.41448	12.999	7.83475	28.5694
ACTL7B	12.1361	16.4947	6.7681	10.6123	10.1952	18.6255	10.2614	63.025	13.5888	19.2305	10.4638	19.2406	29.1226	9.17308	15.3591	13.677	9.4837	14.8571	16.7228	8.00047	11.9619	15.4797	7.43077	7.88661	29.0395	20.7723	17.1961	10.4512	40.6311	14.7196	14.8686	15.4582	9.21689	6.32289	23.0613	5.67836	8.85998	15.598	13.1682	19.8492	12.8476	21.0328	18.8561	11.8856	28.8364	6.93465	11.0475	32.4767	21.2435
ACTL8	20.3071	12.3107	12.8632	13.7161	26.8618	27.5393	9.40088	27.534	17.7895	11.7561	15.8635	23.078	13.3003	87.0729	38.7992	40.7671	38.9679	87.2239	12.7046	12.1261	34.1496	66.4555	18.1799	25.804	20.1001	96.3079	14.4019	14.962	17.9676	89.1995	35.2555	19.4739	15.9153	17.5788	15.3396	22.6215	118.489	16.292	23.0863	24.312	51.8199	23.3348	40.5016	18.5112	25.9629	9.94617	15.0945	129.799	24.8285
ACTL9	60.2246	75.3075	62.5598	37.4033	66.1768	109.723	59.5264	54.2404	49.5245	112.776	123.096	103.008	67.1223	96.2874	113.468	64.7242	136.57	90.8833	120.273	136.691	127.672	74.0663	17.6154	40.382	27.3354	73.2116	25.5944	22.1838	131.485	100.524	145.042	79.9698	82.0339	73.5708	15.4009	72.4833	82.7697	85.8367	84.1669	107.861	106.128	76.5943	66.9162	112.808	69.4968	86.9139	121.916	8.56357	71.6327
ACTN1	4577.54	5461.44	6682.46	6074.7	5583.84	5365.36	6369.24	6181.12	5876.98	7659.2	4211.62	5491.98	4178.31	3774.69	5457.5	5076.13	5478.29	4690.75	6348.62	5976.21	5994.04	10154.9	11424.8	7976.37	5355.87	5784.57	5429.32	4590.29	4548.8	6548.33	4858.34	6230.13	4760.17	5086.93	5896.3	4219.49	7519.65	8312.04	5096.49	2803.02	3367.89	7952.94	5341.52	5048.53	3971.11	5112.28	4522.43	3899.56	3481.79
ACTN2	177.583	214.997	147.258	167.198	171.363	83.1189	144.831	144.623	162.279	176.165	167.565	196.019	210.538	167.178	272.713	258.851	286.712	373.824	196.112	194.259	201.498	170.485	179.121	179.866	252.303	251.501	181.676	225.821	190.848	197.05	197.226	198.047	154.572	117.789	89.7738	135.816	118.287	247.986	183.295	148.924	183.94	159.984	169.862	208.994	117.496	87.4723	209.635	75.172	168.007
ACTN3	61.3656	105.835	110.947	119.629	87.6853	25.1314	42.0546	114.267	114.775	117.853	103.725	144.181	161.258	103.415	143.195	78.473	199.67	220.014	111.09	148.013	123.402	162.63	116.615	140.666	22.8816	87.6859	159.639	173.016	106.864	107.205	136.232	90.4666	144.301	27.4216	69.1462	58.8968	43.5101	171.39	148.407	87.8105	112.273	48.794	95.6007	115.499	92.0558	111.302	100.485	106.497	135.403
ACTN4	2505.61	2577.56	2344.38	2933.54	1671.48	1881.48	1603.62	2448.07	2907.78	2050.51	1737.52	2049.73	1898.72	1387.48	1669.18	2019.28	1613.58	1373.93	2532.39	1944.19	2459.65	4359.86	4999.01	3135.16	4206.05	2725.76	2042.33	3017.69	2739.01	2088.82	2860.05	3382.13	1763.41	3093.25	1642.91	2337.89	1784.03	2336.08	1833.88	1704.93	1848.73	3849.23	2562.95	1699.91	3369.74	2671.34	4445.06	2414.6	1465.07
ACTR10	3718.45	3292.01	2901.76	2962.34	3051.84	3222.07	3174.87	3084.56	2828.97	3357.82	2933.85	3364.38	2827.7	3183.61	2416.25	2665.62	2690.45	2422.41	2660.38	2712.25	2729.17	2371.53	2817.12	3014.28	2934.41	2365.05	2869.24	2916.06	3178.79	3538.58	3314.59	3194.05	3975.59	3128.8	3374.92	3592.49	4047	3324.39	3087.75	2803.65	3021.51	4177.03	3480.4	3443.75	2992.62	3757.65	2570.72	3651.54	2946.75
ACTR1A	808.644	1306.33	887.896	760.463	773.039	938.674	955.594	1223.41	1009.02	1254.74	1013.25	1299.58	633.971	980.832	780.43	787.107	826.668	1058.57	750.654	738.567	900.775	766.797	885.289	914.468	702.296	927.066	751.734	950.311	765.856	1065.48	1032.35	890.259	2344.12	1730.98	1390.81	1887.55	1665.35	1161.29	1359.4	1406.86	2042.84	1685.14	1681.07	1792.02	1400.83	1916.69	1815.37	2214.37	1666.02
ACTR1B	1520.46	1534.2	1507.38	1919.55	1749.47	1458.33	1529.54	1627.64	1639.81	1555.19	1885.04	1866.66	1784.56	1242.09	1421.09	1731.99	1605.12	1652.86	1760.15	1739.18	1527.83	1251.06	1355.9	1098.51	1443.13	1272.9	1627.92	1431.59	1639.62	1478.63	1543.23	1128.72	1363.69	1578.13	1423.7	1200.87	1167.72	1470.25	1479.45	1366.05	1131.75	1302.89	1363.98	1326.26	1320.03	1398.72	1574.67	1626	1582.42
ACTR2	14313.3	14654.7	13343.7	10898.9	11304.3	12155.5	11530.1	12818.4	7778.55	13007	16536.5	13122.2	13695.6	16011.3	13918.6	10223.4	14565.7	7672.77	16606.6	9687.33	13818.8	9902.58	11165.4	14468.8	11087.3	12321.8	16590.1	10962.6	14162.9	15567.5	11922.2	13933.7	14311.3	11980.6	11826.3	14487.4	12516.4	11296	12257.9	12174.4	9729.56	14697.9	16947.1	13438.4	15952.3	13982.5	11895.8	16048.2	14390.1
ACTR3	16942.7	21601.1	16647.6	15283.4	16993.9	17521.1	18223.4	19934.9	14489.7	17662.1	18427.8	25427.7	17809.2	21481.1	17898.9	15986.6	16273.2	18614.6	19312.8	17741.6	17247.4	21328.2	20448.2	18768.6	20018.8	17013	17965.4	19500.7	15742.8	19050.2	14131.9	17098.8	18816.6	21342.2	22933.1	23178.4	21103.7	16842.2	19112	20957.8	22133.4	24478.5	23078.8	25041.4	26111.1	24155.3	16501.1	19780.9	21106.5
ACTR3B	188.08	186.768	278.345	306.014	232.155	201.73	220.904	224.701	293.582	268.854	173.825	229.965	173.57	196.023	157.026	179.86	252.662	152.613	241.927	224.237	277.179	214.13	192.535	203.475	165.859	187.28	85.9138	117.602	234.471	216.691	157.9	177.87	156.746	196.141	75.3277	235.933	76.3844	158.351	216.393	164.42	204.618	138.831	161.495	72.6241	265.395	131.96	143.65	98.1482	170.172
ACTR3BP2	83.6384	230.705	74.1328	170.332	110.304	139.617	107.893	96.9271	168.783	161.136	140.027	111.812	216.056	116.077	112.299	238.023	150.355	222.355	182.124	155.784	114.913	124.274	135.391	156.816	83.8849	88.452	160.769	227.687	121.249	154.246	184.507	81.994	61.8416	69.0717	133.707	67.833	130.294	214.107	119.288	87.354	114.443	113.254	107.936	119.804	108.235	176.471	99.7416	84.9158	49.299
ACTR3C	98.7673	19.9293	10.9423	74.0513	92.6992	41.7004	32.1718	6.97643	61.6099	120.269	59.6784	4.53893	7.39891	95.2214	64.7764	117.932	73.2505	51.8342	75.9312	7.51243	81.5638	61.0805	62.3179	32.0799	57.7264	94.6866	90.0757	6.84799	76.7791	8.10083	56.7627	47.4678	11.1643	63.2258	5.99556	103.793	96.052	32.7603	105.432	115.974	13.8284	7.80831	79.498	130.993	73.3934	28.7473	40.334	55.2889	109.222
ACTR5	640.046	587.779	564.7	537.273	597.352	687.223	707.608	507.615	622.611	489.912	503.268	805.153	772.022	592.767	644.191	711.174	745.84	882.69	518.992	658.449	538.517	339.338	506.429	362.056	457.268	506.867	896.72	538.548	458.851	561.739	469.254	464.244	524.939	553.78	429.59	501.097	254.455	377.086	572.461	657.419	454.156	314.047	542.903	566.742	504.279	517.995	621.418	572.852	545.936
ACTR6	1256.88	1252.53	1412.92	1373.49	1337.83	1140.33	1382.27	1112.36	1327.45	1042.39	1377.14	1909.42	1652.2	1286.41	1494.2	1364.67	1334.76	1215.36	1560.51	1485.53	1044.46	1085.73	1051.66	1145.97	1241.85	1202.93	1182.36	1654.43	1694.7	1494.24	1471.1	1337.86	752.349	657.173	852.232	924.715	948.977	863.6	994.632	644.559	939.194	958.645	882.541	1182.73	831.241	721.624	700.83	716.273	918.031
ACTR8	632.135	630.537	554.819	571.702	614.318	698.441	598.364	721.699	653.023	630.999	496.32	812.625	615.331	751.281	583.857	613.704	565.402	539.476	685.746	609.831	493.951	563.062	459.516	473.893	606.054	422.948	500.637	700.071	679.636	654.517	637.9	673.196	679.518	622.287	634.322	640.814	502.63	499.256	863.93	699.172	774.552	495.688	571.54	636.822	818.907	768.868	610.688	646.808	805.79
ACTRT2	7.46869	7.22945	5.98858	8.89963	6.68939	10.7775	10.4431	6.99847	11.2427	9.35517	10.8347	16.6536	21.1908	8.85794	14.6373	11.8228	8.02286	18.6655	9.76614	14.8604	19.0038	9.92976	10.836	6.60769	14.0276	7.38634	12.1959	12.3143	8.2043	7.8207	8.16341	12.8751	8.5777	12.6952	10.9201	7.45054	6.00305	6.92587	9.78534	20.29	9.77519	9.39653	15.8418	9.58984	10.9631	9.60231	13.2693	8.07056	13.0554
ACTRT3	17.9098	11.4775	41.4717	8.5608	7.23859	7.75915	18.4765	23.1058	13.3795	21.9217	9.80789	53	8.85507	105.936	17.7819	19.2072	16.0843	28.6938	12.9411	25.7197	17.8799	9.59441	9.05299	27.7235	63.6341	3.54065	8.56867	28.4145	9.67012	7.44492	9.86025	5.26503	12.1043	17.746	6.70832	7.44016	14.9879	13.4448	6.42001	60.6248	5.89263	23.7393	9.09853	11.0749	8.5322	16.4618	32.6592	61.2354	6.25145
ACVR1	1526.3	1240.37	1662.98	1501.05	1461.07	1709.64	1549.55	1324.18	1487.88	1910.09	1357.63	1104.08	1293.39	1092.79	1169.94	1646.9	1281.56	1373.92	1360.66	1387.88	1644.24	1387.8	1849.21	1454.84	1505.17	1386.94	1205.79	1206.23	1940.19	1720.78	1909.21	1541.25	653.984	732.591	791.302	808.427	2298.37	1770.34	792.686	634.455	707.096	1116.81	665.343	1179.79	1009.1	850.224	778.447	762.653	849.117
ACVR1B	886.198	929.149	618.983	734.059	741.667	623.836	733.266	811.568	862.806	916.199	884.065	869.63	507.706	520.209	862.039	785.378	867.486	776.438	896.272	723.654	994.781	549.649	1700.52	1325.53	1100.92	1327.22	685.026	600.178	997.746	994.677	1084.93	1070.97	1759.29	931.601	1102.62	1403.94	1231.45	868.537	848.827	711.628	1306.62	2155.31	1457.81	1118.27	1107.54	2163.9	1025.35	1807.2	1055.75
ACVR1C	156.713	209.571	225.551	269.937	280.056	143.376	234.372	142.132	188.286	153.434	191.226	172.464	252.046	126.758	344.013	250.887	328.15	227.08	224.606	219.846	173.605	178.332	67.782	107.626	167.046	153.19	238.51	152.641	181.996	190.751	223.81	113.68	113.071	120.792	205.543	76.9779	302.142	277.154	129.562	96.6007	234.021	160.954	98.6727	300.771	340.92	90.0608	167.306	61.3403	480.94
ACVR2A	381.781	512.521	452.726	542.738	552.666	374.461	367.002	439.468	332.948	502.978	485.584	427.23	427.404	475.196	407.978	437.223	535.776	578.499	510.547	505.505	521.012	392.537	500.531	534.176	439.005	331.211	506.334	288.596	405.106	353.6	391.026	318.141	433.083	241.948	276.619	367.838	599.401	413.172	304.431	251.853	228.425	179.012	428.088	308.472	600.634	435.849	304.046	492.712	360.526
ACVR2B	271.767	161.913	340.463	406.779	244.156	256.809	559.671	194.931	346.882	237.641	198.525	158.255	123.655	183.972	294.509	245.853	205.515	301.204	283.809	341.721	214.424	355.883	65.9768	56.5402	164.892	165.153	167.263	105.151	439.958	316.464	289.485	148.128	158.456	188.099	292.435	251.813	228.503	203.353	213.625	316.6	145.236	188.525	213.832	242.644	372.709	186.417	121.762	32.8859	378.592
ACVR2B-AS1	136.249	247.857	247.412	232.874	155.01	155.719	141.962	181.187	218.135	218.483	173.295	248.133	246.635	260.429	375.836	232.031	292.527	354.629	257.769	223.875	251.046	201.632	232.506	222.416	238.838	188.124	145.403	158.725	173.001	178.082	119.447	136.196	56.0221	137.522	136.052	152.377	142.454	73.6876	201.814	167.004	198.607	191.479	106.666	151.89	224.392	140.99	165.553	224.302	206.761
ACVRL1	40.3588	26.4625	47.9975	75.6317	24.5394	14.5509	83.9882	30.6989	68.6408	72.5925	7.79867	12.2522	12.0809	51.5079	74.1078	7.9876	9.72146	87.7352	7.96912	10.8059	84.3078	27.5231	41.4841	52.0652	12.6768	127.114	11.405	187.251	32.6061	92.7995	87.5947	103.718	84.8754	43.3573	70.9206	115.152	92.651	124.211	67.4286	135.761	51.9221	136.271	15.9383	39.4977	141.373	162.522	30.3664	50.179	94.1119
ACY1	8.46259	63.4221	12.4037	5.20104	6.12235	11.743	7.37237	13.0539	4.52613	12.9544	10.1652	13.45	18.4013	14.2149	7.26521	6.6751	9.38987	12.1451	20.4558	14.0841	12.7796	5.06238	7.55159	5.45303	12.6518	10.5126	19.0723	7.17456	9.08586	8.4065	6.13538	6.06947	7.20518	8.18883	21.3288	43.6274	7.45617	22.4585	6.85046	10.5147	36.7102	16.9328	9.86641	7.61806	13.6321	10.9011	10.6029	65.3403	7.69999
ACY3	117.658	173.492	128.874	169.869	170.549	218.236	142.801	241.518	182.74	174.371	168.227	192.009	218.291	371.357	121.333	147.255	111.02	166.09	280.482	213.272	182.858	111.556	154.214	261.057	137.107	172.136	89.4604	269.419	92.2657	99.9592	187.392	178.245	184.087	130.449	194.288	164.566	181.614	182	263.195	274.268	347.807	260.652	102.809	126.873	246.57	105.195	322.56	136.084	145.365
ACYP1	649.743	592.808	1005.24	898.213	785.664	482.094	867.764	514.754	596.252	790.048	586.504	610.914	820.411	560.997	510.416	890.211	544.677	793.198	667.446	686.064	422.545	702.308	279.218	439.321	851.488	378.88	683.352	896.713	612.408	667.298	691.45	411.798	527.942	527.337	637.284	564.339	478.823	751.407	555.751	983.631	622.095	480.515	711.742	648.075	810.051	527.936	667.433	482.048	704.84
ACYP2 /// LOC101927144	1023.78	786.534	732.203	812.241	763.707	602.474	791.622	743.445	673.175	747.232	502.156	886.932	606.323	636.26	724.667	614.773	678.749	693.353	672.847	701.349	700.727	559.323	689.173	606.552	711.185	640.792	586.826	1113.63	746.31	742.915	820.939	707.146	842.717	871.915	755.179	702.203	566.972	770.307	916.678	656.532	803.221	704.181	775.655	662.274	722.041	721.038	712.582	685.512	871.915
ADA	1444.18	944.363	906.069	909.437	1224.04	1028.41	838.423	889.442	764.658	1767.12	1189.88	1506.42	814.702	1480.45	957.522	1381.7	1539.03	1148.15	764.552	1512.55	598.802	974.911	694.428	807.383	547.629	716.948	934.462	2596.25	1286.33	646.642	1579.44	1334.04	533.038	2132.65	805.931	1511.2	1070.61	1534.27	862.626	2980.72	2723.11	431.575	889.142	1351.76	1138.05	668.733	1818.27	1340.07	1676.23
ADAD1	120.953	169.224	187.534	179.797	104.035	149.453	192.439	133.699	207.627	153.744	229.246	221.719	274.196	176.775	189.611	155.818	144.714	190.602	163.35	160.463	137.543	141.702	189.322	186.105	111.632	208.366	231.975	136.878	146.131	143.851	197.424	136.095	113.2	126.153	132.271	122.947	92.9987	239.26	212.421	182.753	123.949	173.926	133.909	164.936	228.16	194.329	183.789	121.859	172.541
ADAD2	120.274	38.5733	11.258	35.1318	34.5961	87.3562	54.4778	110.476	32.4206	104.207	43.2322	106.217	39.3048	69.1894	36.2261	100.943	85.2765	14.0555	103.485	31.8394	114.352	35.2879	84.2907	106.834	94.2235	18.112	198.381	106.878	147.693	145.373	69.2282	111.234	16.9741	18.4701	105.827	32.8773	130.87	167.29	10.4499	40.2293	95.5519	18.6393	29.5707	51.5772	49.7576	56.7352	139.744	93.0936	6.78159
ADAL	130.691	119.409	94.4647	84.2447	116.39	127.87	189.917	92.4993	198.459	164.991	86.4032	172.565	159.727	105.388	229.049	208.739	172.122	140.35	235.146	206.119	155.541	85.6309	122.87	107.586	179.503	110.864	160.323	152.843	131.902	169.816	206.364	115.323	92.2174	48.9964	115.45	111.519	185.513	153.288	89.2972	125.822	145.713	63.6311	60.1153	152.077	133.166	105.972	72.1165	120.338	41.4867
ADAM10	7978.53	9512	10139.8	7272.78	7880.98	7902.31	7223.89	7930.93	6465.56	6656.46	7450.34	9866.13	8092.52	8697.23	8385.12	7833.32	7785.71	8140.33	8275.78	7322.19	7641.43	6987.33	6859.43	7688.91	7636.82	7072.67	7951.09	7601.55	7894.75	8679.54	7605.42	7999.79	7962.28	6856.7	6939.04	7573.84	7769.41	6658.53	6925.9	6314.4	7887.05	7477.38	7710.75	5829.57	6358.94	7828.38	7126.38	8136.8	6350.9
ADAM11	65.1507	141.446	54.7584	70.2752	64.6189	68.291	97.8278	42.0042	51.0164	38.9942	88.1882	34.9213	78.8972	96.7738	27.6629	33.1802	59.1772	104.339	24.7219	50.3515	120.198	10.4758	12.9704	66.4935	94.5867	28.8493	52.7737	88.9723	37.8962	108.286	46.286	49.283	23.2155	55.4169	51.5249	25.6823	51.5766	86.7486	29.4279	33.1455	34.656	51.3077	69.5479	14.8882	21.8429	65.1291	43.7397	65.5338	30.5439
ADAM12	109.881	60.0536	179.088	53.8747	44.5347	44.6884	140.492	114.948	138.856	47.6691	102.603	53.9498	199.942	56.5185	183.978	64.3308	270.314	61.326	232.25	57.4728	213.174	197.864	191.919	150.192	151.206	172.725	101.759	80.2242	81.0142	123.467	44.6587	224.452	340.989	137.857	152.14	184.778	170.638	240.493	58.27	46.1377	195.332	50.6629	164.639	47.688	34.3153	159.608	186.163	112.909	258.872
ADAM15	713.996	784.541	661.776	617.793	536.051	706.69	468.808	742.042	727.095	807.166	844.445	797.685	574.34	1089.12	785.338	793.512	823.756	994.118	781.621	565.173	1028.55	513.416	1121.9	1460.82	982.95	1098.73	759.774	601.913	796.596	883.798	805.891	894.032	2399.62	946.9	762.751	796.752	1086.94	874.083	836.976	822.481	748.335	2106	1382.76	1155.51	921.99	1363.43	980.405	1396.29	607.089
ADAM17	1154.68	1079.82	939.985	1042.76	1136.03	1002.71	1028.93	1213.34	1289.44	1371.33	1512.77	765.88	1378.7	1487.66	1139.44	1463.9	1410.85	1494.76	1294.45	1277.13	1263.77	1439.28	1761.61	1840.72	1529.75	1503.14	1572.95	916.291	910.838	877.869	1206.65	1059.03	1003.79	848.738	1339.23	1037.89	1466	1478.7	868.715	973.458	1036.8	1835.74	1000.6	514.75	1079.42	1261.4	2001.99	1141.33	850.356
ADAM18	52.679	59.729	61.134	75.3641	83.8179	38.8205	67.2658	52.8262	57.2765	66.3213	14.2016	130.009	84.0026	107.639	118.533	121.896	112.197	90.4565	60.0941	100.046	101.137	59.6745	76.5078	66.2211	55.041	66.4771	115.447	87.3036	22.9353	78.1953	63.9041	50.1458	37.9843	58.3737	58.8335	56.6768	77.8316	95.4553	21.294	79.376	51.9078	39.2713	59.1046	72.6208	48.835	66.8898	52.8586	184.464	42.4964
ADAM19	1193.49	859.054	1053.6	1036.59	1190.91	1210.59	1150.8	1215.24	1374.82	711.772	946.59	847.871	930.038	920.821	829.736	754.647	906.9	965.341	734.299	850.312	1031.88	1964.02	1593.49	1156.02	1527.35	1598.08	857.379	1420.8	988.115	876.471	952.19	1054.35	1215.34	860.587	1202.8	769.421	1274.55	1219.07	1522.32	2016.51	1844.51	767.425	1121.14	1161.66	1110.71	903.634	1910.91	1259.16	741.683
ADAM1A /// ADAM1A	468.47	250.817	327.909	495.334	464.622	417.559	500.529	356.436	392.686	255.428	464.523	201.501	413.537	337.811	533.74	482.095	408.021	301.835	430.906	391.374	256.362	200.165	229.036	300.339	436.921	443.298	341.148	249.776	389.106	365.883	345.284	257.141	161.001	132.216	263.341	264.055	227.445	198.826	220.171	306.377	140.846	297.691	214.876	214.7	177.651	177.779	264.99	243.613	314.254
ADAM2	25.2966	4.52025	43.7755	4.23791	4.12184	14.1667	1.98521	4.38224	16.8681	3.5963	35.8921	1.65847	64.9792	45.9127	32.1078	17.0569	6.64207	59.0217	6.75832	8.45771	4.65747	14.2642	27.3928	8.86555	9.91743	4.01001	64.9278	63.6418	34.3978	43.8649	16.2445	16.9182	65.9139	8.42592	2.19135	25.7513	49.3443	39.2678	4.33309	8.36096	3.31016	4.35893	22.8055	1.44057	68.2191	6.42528	35.2155	4.27022	12.9876
ADAM20	119.658	33.3608	144.419	150.308	145.189	62.0531	75.9434	108.739	100.04	127.832	45.7079	135.721	176.593	124.078	117.577	153.666	154.388	229.039	165.042	125.342	113.45	117.084	74.6465	152.548	139.169	110.774	143.874	155.714	148.5	148.901	72.6064	161.192	105.955	63.9322	98.6341	37.6401	94.6685	87.4128	29.5645	51.2946	22.9194	40.9292	85.7554	51.9259	62.974	13.7558	30.465	124.948	79.7008
ADAM21	91.7022	158.039	106.003	99.362	100.067	49.2369	78.8915	98.4135	98.4546	126.205	130.571	203.151	164.448	171.125	171.388	145.309	203.592	222.229	180.031	155.118	145.947	138.627	184.074	132.607	79.6892	159.433	154.065	172.366	108.309	149.032	126.934	73.244	56.7949	49.1248	63.6492	59.061	95.1202	130.227	74.545	89.887	74.6093	112.508	49.5287	97.867	90.5688	87.8867	104.213	116.675	66.6776
ADAM22	77.2604	41.9494	71.2937	12.2869	15.3732	48.0036	30.0472	66.6888	63.1905	41.997	132.631	45.8554	19.6363	192.906	48.474	47.327	22.1314	43.4846	39.2829	65.0378	50.8066	28.9197	95.2774	19.1113	44.9358	27.7736	70.175	15.6334	25.9396	38.2414	28.4281	13.9807	71.846	14.1671	139.986	63.7363	112.397	29.225	123.017	13.6375	48.8398	121.755	132.69	261.021	189.867	30.2161	24.618	143.585	111.717
ADAM23	166.488	115.146	124.051	194.928	117.467	105.234	161.887	134.875	105.519	150.118	187.222	91.0759	166.78	116.849	255.789	145.06	77.2354	307.444	163.363	196.218	139.924	140.868	241.597	71.2248	136.173	122.566	109.703	49.7014	121.064	121.591	171.918	71.2355	19.5481	221.715	98.777	51.7367	290.906	97.8345	136.287	144.327	17.4932	46.3822	33.7288	83.5096	83.995	115.256	132.096	35.0508	161.904
ADAM28	1420.51	515.189	981.174	543.847	784.588	490.129	822.909	551.36	918.967	331.252	599.245	248.425	996.411	950.48	573.772	758.063	831.407	775.111	469.968	761.202	479.366	1047.33	652.164	296.24	1172.73	1166.43	424.244	696.838	630.302	358.387	338.396	306.442	262.341	257.649	725.483	102.032	84.1261	308.1	658.236	452.959	277.009	103.965	382.227	600.733	182.575	304.595	203.509	107.842	360.103
ADAM30	68.4777	13.7861	85.1552	56.4937	79.7852	107.035	98.4129	109.629	61.2547	80.297	10.2736	18.9877	68.2891	76.6512	109.947	17.04	65.2615	28.4149	54.3106	93.6298	146.469	37.8407	59.7306	16.7421	43.9438	14.7696	39.2053	98.1782	37.9286	55.3569	58.3367	61.1062	12.8602	25.9672	11.7163	84.0885	22.5113	106.187	36.0275	27.2298	89.5554	101.775	87.3367	66.0018	27.2295	33.5799	80.4257	22.974	70.444
ADAM32	6.38052	65.0345	12.4836	18.573	63.1301	37.564	35.2223	26.2932	4.34558	6.18635	16.2261	40.1003	59.7642	64.3069	18.847	61.2884	53.7939	52.4098	91.5382	31.6275	67.3862	53.896	11.5462	43.1325	43.9104	48.4088	45.7316	10.7537	24.2668	22.1271	45.5782	29.534	77.1438	25.163	3.58725	42.5973	26.7728	120.515	34.3785	100.738	28.3966	28.4665	57.1287	71.039	43.1421	37.3712	38.6845	50.6847	40.1615
ADAM33	442.689	324.033	607.511	540.274	437.063	393.652	302.497	396.601	506.06	482.367	493.501	279.785	687.765	511.885	661.902	574.486	813.709	717.96	610.271	693.066	499.551	555.729	478.931	631.594	622.12	316.879	346.084	71.3871	216.432	249.621	264.967	86.6494	83.3129	340.484	354.185	56.5266	141.353	325.67	580.631	733.931	106.198	552.953	515.392	81.9191	696.719	557.79	631.636	99.1464	304.725
ADAM3A	8.55653	9.69087	44.7712	28.7708	31.1904	24.5372	7.31521	22.1222	13.2816	16.0055	53.5205	74.1653	10.7172	59.3768	76.7488	85.6384	49.5631	9.18145	52.6986	58.8624	48.8512	33.3916	9.55599	38.2624	42.1949	5.88129	106.941	51.0682	75.3076	4.8653	18.9887	63.8646	46.6073	28.2905	14.7971	24.2327	5.37871	19.8681	32.4716	83.1849	13.942	5.20435	6.37576	6.8658	29.6103	54.764	24.507	7.06873	12.2197
ADAM5	47.4038	94.8222	82.932	59.1502	39.0042	7.6283	45.704	67.7414	78.1982	40.1964	13.5277	3.38837	18.2989	69.7414	10.4965	46.5458	60.0241	24.7376	65.7385	5.68183	32.287	52.0192	46.9694	45.2033	27.1026	61.8908	13.0389	96.6022	12.9585	27.871	23.4888	26.7284	52.6487	48.8955	80.2792	68.5782	39.5603	88.8525	8.61051	9.63197	44.4188	68.3532	51.2873	62.7401	29.2266	73.3555	48.8604	11.0139	113.068
ADAM6	10.0118	104.472	72.3805	31.1421	41.983	115.059	31.1515	104.519	40.1744	18.759	19.8903	45.5805	34.545	23.5185	48.1784	39.0763	51.9496	13.7028	54.6551	37.722	50.7098	39.6305	47.9094	50.8666	16.1239	60.7757	12.019	21.3379	19.4811	16.4335	19.9303	17.3692	61.0144	9.97313	36.0911	10.8127	8.61302	31.7577	45.0519	29.3764	22.9503	14.9866	20.1766	54.2207	13.3578	38.0684	80.6554	32.2643	60.6809
ADAM7	7.6742	34.1339	10.6431	2.43235	33.2529	7.14467	6.43232	6.08223	3.90104	6.25468	47.7124	22.854	7.5275	14.3756	13.6636	4.71522	12.3344	23.6498	59.9231	18.0562	8.02297	23.6779	7.575	66.0385	5.13741	3.3172	8.80364	97.8025	2.63987	40.4503	46.1559	4.23029	8.31301	20.7431	53.3893	55.9366	3.41786	16.7938	8.41706	12.6959	10.6766	4.4827	6.73049	106.2	67.421	23.7861	6.36911	49.483	6.27168
ADAM8	1725.22	1747.47	1538.74	1660.21	1682.09	1826.57	1227.31	1242.73	1363.24	1596.06	2109.41	1506.07	1608.53	1480.16	1631.54	1962.77	1064.91	1649.78	1603.77	2027.47	2438.59	4143	1517.63	1438.23	1813.73	1476.31	1697.58	1376.78	1792.93	1627.6	1660.25	2407.22	2364.01	2775.44	2116.63	2108.87	1952.28	2279.92	2517.09	1669.81	1471.75	1371.85	2350.42	2113.39	2471.45	1263.03	2266.19	2008.78	1382.6
ADAM9	699.103	1120.41	690.671	821.325	562.58	802.379	629.786	986.463	1065.99	1468.72	1243.93	1084.58	655.15	1015.31	864.902	852.629	1084.5	737.052	1359.54	776.283	1372.54	718.974	2228.17	2391.65	1728.39	1633.25	1046.14	820.518	735.58	1472.55	1374.44	1504.39	1832.2	687.906	783.503	895.447	2502.64	1422.46	575.479	320.531	553.363	2362.51	1368.8	691.246	543.156	1253.52	627.713	1486.2	499.822
ADAMDEC1	59.8658	130.494	37.5048	52.4539	58.8167	88.9404	78.139	43.6191	118.253	90.0763	103.07	110.256	88.2414	74.4298	68.7459	157.468	82.3054	88.472	121.653	114.759	113.505	89.9337	60.2108	195.374	77.5347	33.8256	115.74	114.208	112.927	110.129	126.706	70.7962	90.6952	99.6117	73.8442	111.543	76.9062	129.87	45.6174	62.8068	63.8651	65.7763	106.018	97.9188	50.9696	129.861	62.8611	68.6135	36.991
ADAMTS1	48.1659	334.362	13.5343	35.81	18.1195	79.5304	23.5084	198.968	141.972	70.2845	110.769	143.811	31.1453	232.986	30.8514	195.929	84.2966	84.5605	20.5818	190.987	98.0059	127.455	100.394	100.08	50.0139	9.88352	51.6623	82.4185	16.5869	7.64996	172.062	171.483	18.3689	62.1611	7.60399	28.8673	6.38123	10.3552	12.1586	7.30508	69.6584	61.0022	17.8802	13.118	7.70801	148.334	102.511	101.372	12.2347
ADAMTS10	393.74	405.284	531.114	362.392	441.623	383.407	524.593	442.574	481.392	384.558	312.527	211.853	159.055	461.882	276.555	251.593	297.727	181.209	298.273	335.275	227.082	324.241	364.121	205.001	272.818	406.597	364	192.835	326.697	402.876	302.823	343.674	241.591	272.117	222.162	272.066	169.545	540.145	357.017	231.929	92.6735	160.907	302.333	200.898	130.828	326.736	298.565	378.6	207.368
ADAMTS12	146.429	168.225	110.859	132.881	95.9512	115.348	63.8927	103.133	134.034	168.092	202.185	195.449	137.711	174.252	207.928	181.205	142.027	219.342	155.079	141.585	157.74	175.191	118.269	134.031	124.077	132.743	196.119	122.266	165.152	151.687	140.325	125.234	237.783	77.4654	72.0377	128.367	118.511	99.0496	187.8	147.474	153.777	244.898	223.458	199.901	183.624	118.785	184.592	175.221	136.527
ADAMTS13	117.137	148.181	104.137	103.888	32.7335	219.609	62.5077	229.65	118.669	287.339	82.4496	210.133	278.244	229.181	56.5601	288.058	99.7028	180.926	73.2328	181.627	220.462	168.8	92.8685	218.677	144.053	105.026	68.7965	186.238	145.995	218.294	214.926	213.747	85.892	93.1789	247.322	48.1497	267.988	48.6507	163.729	142.36	109.788	204.249	192.942	280.793	94.362	161.446	63.0087	209.906	234.01
ADAMTS14	76.9925	95.9505	26.7604	47.1813	67.5644	45.7735	19.7901	126.098	72.8082	89.8976	21.1727	84.0634	8.40982	11.1148	126.947	63.9788	10.6853	156.661	118.753	80.8614	54.9467	39.7842	55.5049	10.2297	107.378	71.307	73.0756	207.873	157.464	113.666	123.179	111.964	127.996	88.9375	117.554	54.5946	44.4994	94.3833	67.9031	97.3922	48.9495	10.0378	107.689	13.4382	46.2125	14.6656	62.6167	19.4992	43.2752
ADAMTS15	42.6491	63.8768	11.8362	31.5544	25.2606	55.141	58.6783	22.0109	16.1534	83.0175	95.8746	84.9507	72.5847	70.6947	59.8703	71.5005	67.8512	20.5494	15.1611	62.5021	33.0061	15.4073	104.266	37.9709	47.8928	36.4278	15.4695	39.5171	72.7278	59.5073	37.1465	41.2643	7.46938	27.8774	30.7393	12.7771	6.4481	17.0782	46.3174	22.2327	13.1119	20.2226	25.9768	13.1225	19.4224	69.3179	25.995	10.3608	19.8047
ADAMTS16	7.79329	29.9947	12.1912	15.9589	9.71461	9.28877	6.2216	12.0921	53.7311	19.9265	81.7587	99.7425	20.863	14.5219	38.1386	11.7161	16.9354	20.2035	35.1207	77.685	16.6593	9.98868	86.9795	13.6729	82.3092	80.8931	20.9894	13.3925	9.61542	7.11753	10.6502	18.6749	11.7696	7.49403	37.9115	4.18893	7.2903	8.2379	66.251	10.9154	17.6077	103.259	52.302	44.1845	71.9764	39.4863	21.8142	14.4892	8.86167
ADAMTS17	88.2316	143.67	42.4353	48.5527	22.596	60.4139	33.7133	63.9377	114.252	36.9011	82.9107	38.5044	56.5438	21.9774	47.261	93.8133	184.063	116.652	45.8604	138.542	108.832	68.3321	48.3526	43.7147	14.0535	11.8522	114.764	99.786	95.0017	102.092	147.063	78.9821	104.856	58.2355	99.9635	149.04	72.5196	74.329	63.1766	84.0401	14.5036	61.4145	122.759	25.5955	51.907	72.4347	113.87	65.0584	78.2661
ADAMTS18	135.55	154.026	149.792	131.151	178.702	127.118	57.6063	146.696	155.751	160.689	85.5084	116.38	43.7459	66.7963	69.7304	34.7719	203.077	108.484	45.6039	34.9273	199.044	132.044	173.292	167.639	93.3211	183.98	51.3303	218.003	187.341	157.122	173.8	119.378	43.8749	20.598	134.54	127.484	125.657	171.444	121.021	92.5282	140.218	97.899	102.76	153.262	162.916	87.6236	106.209	140.306	147.527
ADAMTS19	11.8944	26.356	38.9773	17.907	15.6606	22.043	4.35634	1.10359	11.1307	7.88599	28.6914	8.72079	14.1026	29.7676	24.3291	16.6027	4.84246	7.04784	57.5136	12.2561	34.8386	16.7829	32.6484	47.1183	21.4368	3.45007	14.5884	13.6786	24.2616	9.22771	0.473464	12.1862	26.5275	21.2942	21.6574	12.9419	12.7069	22.9485	22.3591	29.4657	17.3393	2.34565	17.7712	35.3335	1.4059	26.4673	6.99733	9.39094	49.2401
ADAMTS2	69.1343	25.9178	31.8447	109.979	38.4552	20.0846	71.2851	90.1392	247.503	128.194	97.2624	21.6993	156.917	139.23	99.6506	88.1766	19.474	91.0846	92.7134	81.4273	66.9157	37.3927	2149.55	1325.07	382.281	2126.22	116.198	386.46	116.291	158.948	73.9532	220.104	1171.19	17.7395	52.1719	17.3805	84.096	736.836	37.7407	113.639	41.745	1559.06	789.137	14.2555	17.7522	903.965	530.197	1076.64	96.8788
ADAMTS20	30.2461	86.1751	23.8874	53.7134	43.8333	35.975	15.1836	60.1007	72.166	29.5902	58.8076	40.4691	43.6286	54.4652	69.9137	51.3564	44.1517	52.1654	22.6824	83.1118	55.7721	53.5106	39.4078	30.5948	61.605	43.0458	42.7155	38.2529	45.4285	34.7347	42.8571	15.2636	26.3967	6.34823	60.7599	4.25211	23.0477	62.7599	38.4118	57.136	18.7806	14.2619	64.5078	26.0806	61.2871	29.5833	1.3966	45.7921	2.19754
ADAMTS3	42.9063	53.3343	23.7159	61.6785	15.6177	39.4611	37.6173	18.4511	46.4686	58.3516	47.0762	98.9791	46.042	67.3708	17.0589	46.5021	56.0225	61.7876	39.7377	86.3026	37.6826	12.6574	39.6639	39.7512	42.115	35.4323	25.0015	55.8963	52.8286	45.1098	55.7009	26.2874	31.7125	43.1919	42.9037	21.4142	9.11978	44.8123	49.8993	24.5474	69.9459	4.24898	36.8288	5.50849	54.3636	44.4379	64.6375	16.4979	1.38826
ADAMTS4	160.656	195.191	104.804	232.544	238.888	141.522	173.972	205.114	186.578	105.258	214.563	124.255	342.597	251.686	233.744	172.069	235.623	266.599	163.456	179.038	216.158	208.611	260.165	188.189	270.814	233.304	219.597	222.183	197.766	186.681	173.418	222.044	225.379	155.132	177.833	162.076	118.775	218.579	231.595	219.234	129.394	200.822	241.587	219.719	172.263	292.532	107.727	217.68	179.251
ADAMTS5	174.881	105.512	64.9605	180.976	136.732	545.457	49.0374	216.266	211.634	134.461	249.302	323.93	170.757	177.359	221.078	182.031	195.141	92.3748	148.131	85.3638	215.705	86.8294	260.895	97.6379	209.833	194.724	230.566	62.0789	132.151	190.618	198.996	82.4006	171.672	19.9267	148.076	52.8502	79.5692	53.8316	177.473	110.203	102.482	189.853	130.2	29.0447	21.0008	321.826	236.78	277.905	71.4475
ADAMTS6	56.7327	89.8685	77.5031	13.9511	61.6465	11.8303	11.0506	55.4606	117.439	69.4332	17.9616	6.48833	221.81	9.7907	119.779	122.416	115.291	111.098	24.3684	7.63733	110.286	13.5233	73.4972	61.4772	114.86	98.977	80.0601	101.108	17.9802	59.5075	77.8218	31.7354	14.8445	35.342	8.2326	76.9808	12.9515	54.1614	73.1509	73.6938	11.1051	28.9133	103.342	17.7419	13.3667	19.519	53.9458	50.8573	14.703
ADAMTS7	41.0568	28.8697	45.8136	18.8102	25.0688	11.8759	65.5678	61.0459	63.103	103.387	79.2245	29.1899	34.6541	14.8812	28.8703	26.0117	66.9989	30.5606	31.0824	17.5153	30.2722	26.005	16.8679	12.3772	21.9813	15.8492	9.82087	22.384	20.621	24.9536	28.6676	27.623	14.1531	35.7089	13.1534	11.8736	27.0773	26.0899	105.639	130.35	97.6474	35.7788	15.7557	18.1789	28.7798	17.6141	26.7113	17.0298	18.9205
ADAMTS8	38.8938	54.6353	12.1297	8.40083	20.0343	8.52956	24.1705	35.9098	16.6934	45.451	11.4293	80.2623	130.559	58.1314	85.1624	24.196	87.3368	85.1423	72.8319	28.1101	40.048	30.672	58.4095	53.2067	98.7722	7.96336	63.761	22.8192	20.8909	47.6845	23.784	53.4489	51.0748	36.32	11.6368	3.5839	19.4036	24.259	11.3411	50.9346	57.9731	4.14595	68.2574	71.2175	57.6431	46.1102	40.5614	8.7717	55.4739
ADAMTS9	161.117	217.118	185.935	129.544	153.519	125.227	120.654	157.797	169.5	207.343	110.645	175.755	195.69	192.279	169.624	226.411	159.264	257.903	150.335	210.579	217.608	260.944	263.904	150.62	107.459	220.202	173.407	155.614	230.123	123.51	183.883	171.425	137.502	95.2275	109.541	107.644	103.482	232.841	190.108	191.616	145.538	188.46	144.992	210.921	195.611	146.278	113.021	150.47	172.018
ADAMTS9-AS2	67.1167	14.7548	8.92688	26.564	6.70884	45.8283	92.8355	6.63711	60.3794	32.7983	57.4113	21.0611	163.13	31.806	48.8579	71.5294	89.087	8.41157	71.3973	83.6188	89.7081	104.517	10.9925	31.5426	14.2982	7.30009	42.112	15.7697	13.9638	92.5158	12.6309	10.4393	31.7877	84.3679	8.66416	90.2142	52.07	7.58955	13.0274	54.9719	122.451	40.5317	79.7243	19.3273	62.7722	65.5356	58.0667	79.0808	8.11712
ADAMTSL1	8.70205	118.446	17.6607	8.00881	81.9466	13.841	56.5741	73.9935	59.0097	37.2439	13.5049	12.5358	65.4431	13.3743	26.0836	101.035	71.2171	16.6717	15.7596	98.2255	65.7788	22.7264	15.8294	11.5755	11.429	68.7089	55.1527	49.7097	10.6177	17.7254	55.8572	70.6873	116.029	14.5945	94.9052	65.5292	33.5314	126.609	57.3324	106.975	55.2731	27.5467	10.3037	96.2866	87.9091	61.4084	73.7505	21.9225	59.5144
ADAMTSL2	6.78183	5.62999	8.17056	6.523	3.9314	8.06293	12.9035	5.0989	7.66229	5.27552	6.61046	5.03205	11.5425	6.31196	4.99501	6.49358	9.2387	6.7634	7.48758	7.5179	3.98026	3.2704	5.47141	4.03274	4.96066	5.32627	6.09097	8.23211	4.2786	11.029	4.07641	5.50267	6.50666	25.0515	8.09128	4.9128	5.81873	8.94649	5.75955	9.75224	4.58632	10.6853	38.4	7.17802	4.7065	8.67968	9.98777	8.91126	9.78396
ADAMTSL3	70.87	96.4157	32.1103	39.604	50.9637	103.555	4.11031	59.7397	50.683	69.7978	84.2549	54.2651	121.51	86.2244	93.4658	104.108	137.225	84.8016	77.0891	85.367	70.4221	77.7191	71.0039	84.7354	61.0424	60.8221	67.3725	71.8663	89.7559	75.7802	69.039	79.2726	41.6291	69.6526	53.5734	70.7581	34.4041	96.9314	8.30431	63.6186	21.9059	37.5281	41.6073	49.0388	50.1403	28.3029	30.2105	29.6787	34.3342
ADAMTSL4	880.68	797.782	460.33	591.921	575.516	753.849	491.351	830.743	615.384	1430.7	812.737	506.387	526.598	691.068	623.949	691.127	870.501	572.331	899.704	417.776	1126.89	573.705	1240.79	972.58	712.983	825.563	541.408	534.343	695.162	779.265	1013.12	923.689	738.187	543.691	524.471	629.167	615.878	292.22	284.687	520.21	683.196	372.242	359.334	384.238	625.969	597.373	490.888	605.73	241.543
ADAMTSL5	81.291	22.6973	96.6789	42.275	25.0121	48.7236	37.4798	102.681	39.646	82.9434	34.186	24.1209	153.904	74.6539	87.452	14.7584	36.1673	191.249	162.159	47.9799	105.634	111.226	255.107	78.6222	69.0235	22.559	97.2952	29.5591	27.9325	123.384	68.6901	31.1996	40.0885	164.177	19.3451	28.6501	12.7158	69.396	120.29	25.1128	16.059	104.155	35.8793	95.0543	122.353	14.7252	54.7944	30.286	127.997
ADAP1	1301.57	1451.64	1570.17	1070.84	1231.73	1442.03	1240.57	1889.67	1454.32	2069.26	1625.16	1439.37	1636.92	1618.25	1350.88	1250.82	1339.48	1711.67	1523.23	1144.27	1643.06	1769.39	3094.52	2346.24	2467.76	1904.28	1531.68	1450.31	1666.96	1554.58	1876.41	2238.57	4602.58	3415.09	1817.72	3448.81	1858.95	2156.4	2011.04	2378.05	2376.56	3981.67	4422.8	1505.91	2134.72	3917.85	3069.56	3436.83	1538.65
ADAP2	749.377	894.687	512.425	577.097	484.044	810.883	556.985	811.294	881.274	1475.11	895.981	647.804	563.162	702.521	559.218	730.798	981.147	690.515	632.382	438.778	937.95	446.826	1515.52	1451.44	1092.1	1147.26	801.189	529.812	658.054	906.375	1182.74	1026.69	2076.88	1276.6	1069.26	1757.84	1136.46	725.004	1221.51	922.779	1334.87	1661.53	1580.69	695.738	1297.76	2012.5	1049.75	1556.2	979.664
ADAR	6330.69	6417.99	6939.78	6026.01	6971.21	6450.24	6954.95	7207.95	6111.25	7975.69	6207.53	5885.1	6082.72	7065.36	6708.01	5511.25	5810.18	6033.65	6402.39	5540.02	6552.95	15351.8	6821.92	9225.98	7665.77	6746.23	6360.03	9898.18	6481.01	6607.71	5919.56	10395.5	8992.12	18838.2	16287.6	15602.4	11319.2	8421.77	12498.4	16000.6	14065	7106.83	10646.7	15243.9	15981.5	9145.03	9383.62	8295.74	11942.4
ADARB1	804.994	627.586	980.221	950.495	897.863	735.903	1049.43	818.358	916.093	363.527	858.965	374.666	906.021	694.436	839.943	792.952	700.706	932.296	694.535	1194.76	369.999	933.446	428.822	367.717	1027.62	487.304	813.939	448.256	785.992	530.084	619.688	357.074	622.018	1027.29	906.094	463.592	575.931	452.644	1188.6	846.041	538.389	212.776	602.889	932.076	771.176	597.295	462.465	510.466	816.146
ADARB2	7.1791	28.7562	36.2299	21.8657	18.9536	13.012	31.3167	8.26782	47.9879	10.9591	30.818	52.9188	21.9991	78.9952	44.3269	43.1978	28.6157	31.4977	23.1595	36.2918	78.9013	14.5639	10.5939	25.7252	6.15249	50.6947	10.7441	15.6765	86.7664	17.5675	24.7601	41.5416	16.2301	42.2652	18.7558	13.4438	120.874	17.5362	58.456	59.9495	14.4112	23.8543	7.19526	12.7395	8.05847	18.3469	53.5676	63.2161	36.7882
ADARB2-AS1	259.904	222.859	146.25	276.173	193.929	134.356	33.0658	214.194	147.095	234.852	267.844	167.82	326.523	222.479	307.318	209.944	366.074	300.464	230.878	85.8163	162.011	170.633	328.434	310.192	241.289	253.077	278.033	268.572	262.493	178.666	168.66	220.882	246.142	258.972	271.302	304.186	138.116	273.655	259.745	317.257	251.076	230.168	225.558	301.896	255.935	265.525	274.229	301.278	286.094
ADAT1	995.065	715.592	902.882	844.696	937.923	947.359	1126.94	889.346	818.113	612.721	792.739	572.056	964.673	798.06	694.879	983.261	914.836	792.977	1023	853.848	742.553	651.881	633.362	730.043	791.026	860.966	647.893	545.618	807.074	677.921	692.495	718.252	344.125	390.121	609.163	372.624	462.581	723.988	542.073	542.364	478.259	624.125	388.837	525.204	505.094	451.356	513.776	479.32	801.488
ADAT2	328.357	297.299	400.797	323.873	454.606	259.501	391.46	283.983	348.616	182.137	290.678	258.155	459.898	320.469	473.978	362.346	289.368	302.869	365.653	323.394	294.734	239.795	235.292	305.596	277.65	354.963	343.881	268.386	209.258	223.748	236.145	183.511	125.598	206.614	194.321	193.248	141.119	269.386	165.856	169.437	185.283	127.903	220.491	208.418	166.76	177.226	247.991	178.087	210.704
ADCK1	227.482	360.089	419.863	364.127	403.612	466.667	452.405	415.397	285.117	403.89	508.797	189.291	452.852	429.898	358.595	478.856	432.473	416.563	396.796	455.297	367.458	250.837	441.914	408.832	447.272	609.829	407.98	507.605	365.633	270.823	258.707	324.623	375.055	262.762	369.954	311.828	296.305	402.018	419.3	463.056	400.281	320.783	269.158	368.279	395.829	400.814	368.97	250.236	446.965
ADCK2	677.737	570.273	721.727	791.852	594.618	693.88	837.015	819.429	757.205	764.573	830.766	999.956	922.75	685.314	749.63	1063.67	814.674	841.62	741.311	859.477	732.93	642.927	768.918	537.171	654.045	607.965	761.939	680.775	765.3	469.919	711.307	570.546	616.969	620.102	585.317	776.353	759.79	903.952	887.682	950.15	597.939	543.982	605.699	518.892	612.975	630.643	648.068	632.004	536.42
ADCK3	1750.14	1391.92	1765.53	1426.66	1475.54	1631.78	1649.78	1338.03	1423.85	1437.18	1234.42	1595.76	1498.2	1307.89	1630.6	1665.88	1320.27	1367.76	1638	1476.76	1468.8	1073.21	1789.76	1206.86	1612.75	1846.87	1450.04	1088.25	1740.49	1638.84	1673.54	1500.46	2758.08	1804.97	1833.39	1538.75	1167.6	1260.91	1870.17	1490.1	1125.81	1783.72	1452.39	1599.47	1318.64	1691.47	1896.73	1752.08	1989.34
ADCK4	429.234	477.344	287.069	430.953	335.136	258.728	311.712	399.573	505.858	345.113	365.503	416.403	366.398	354.708	405.196	191.776	331.635	441.412	394.472	468.636	372.122	286.382	529.463	379.53	344.502	384.981	291.146	384.129	261.954	344.24	451.609	471.245	324.355	302.693	196.171	338.158	274.955	420.74	420.325	269.921	238.214	330.68	258.495	286.67	223.642	275.544	284.875	303.827	372.468
ADCK5	146.436	45.1659	125.384	110.7	105.154	100.66	139.357	189.756	117.03	99.2266	56.6156	117.517	198.702	22.9616	10.2882	162.243	191.36	132.16	136.199	13.8488	97.6725	94.2706	31.4045	65.9079	138.11	36.4822	194.197	106.492	154.047	73.0307	147.446	116.885	143.289	113.08	246.237	25.6727	57.2476	67.2298	160.232	33.5028	67.412	154.094	112.607	237.271	199.703	49.3349	228.439	42.0711	228.848
ADCY1	81.9398	94.2773	44.064	94.5904	38.1928	66.7494	43.7069	84.3544	19.5616	30.1349	145.657	14.312	80.3246	122.163	24.2965	56.3505	138.096	185.167	175.581	20.7758	86.6761	10.7904	138.333	109.93	116.334	18.2762	76.7173	52.2325	59.2322	65.695	45.1691	78.8066	150.631	79.0865	5.3076	95.2003	93.2706	93.8301	159.316	95.3017	18.9718	48.826	84.8537	41.2887	13.2789	84.6424	17.9837	169.884	48.929
ADCY10	91.44	100.93	34.6263	46.2062	74.8232	41.688	75.4822	46.2121	42.7563	52.9334	84.5328	79.1201	162.699	98.6637	70.6197	72.1986	94.1287	140.98	133.814	122.74	108.422	83.8093	61.1283	72.5049	48.6833	37.4105	98.0551	82.5697	80.1158	48.4567	32.987	70.6463	85.3828	65.4647	53.0707	32.6808	91.7549	87.6997	60.7515	50.3225	128.15	81.7391	110.397	6.19148	69.8923	75.609	65.8166	44.2993	63.7172
ADCY10P1	288.798	241.085	459.634	393.815	432.115	384.165	560.479	302.922	477.184	241.552	319.423	329.097	774.015	357.673	435.026	425.707	333.37	374.437	384.536	553.192	450.819	454.672	429.609	254.653	360.727	340.063	334.251	404.447	392.367	309.151	357.39	274.976	223.33	182.309	250.595	243.726	176.591	296.604	357.334	353.562	219.75	306.046	200.517	185.615	320.408	248.844	294.186	281.967	342.534
ADCY2	115.354	230.452	145.041	93.3105	134.343	138.967	87.2368	148.734	124.351	194.58	213.225	200.565	138.171	170.376	163.942	161.184	96.6858	249.022	189.554	166.624	171.612	148.483	201.489	124.069	193.404	196.768	138.203	120.967	170.106	208.568	137.793	157.881	174.422	76.1224	45.919	73.9093	70.3686	100.313	136.895	87.3942	88.0251	56.7152	116.12	146.104	204.945	84.3919	59.1609	60.4545	35.8557
ADCY3	488.046	438.454	560.967	528.732	338.602	334.05	435.332	446.172	536.883	679.149	323.959	415.954	423.602	310.398	351.202	422.669	515.792	527.511	423.72	442.612	391.957	383.43	306.83	763.839	273.511	482.558	379.947	490.132	369.461	323.835	364.386	274.157	269.661	484.284	450.215	470.828	483.508	531.998	406.315	306.357	525.235	284.941	297.786	620.7	501.96	364.182	605.01	505.728	422.019
ADCY4	91.1655	34.6585	46.7284	68.1869	315.872	227.261	202.391	139.423	145.062	56.6886	242.932	95.2586	49.9661	46.2785	58.4578	179.618	194.663	62.6165	115.307	157.691	167.781	230.384	61.6742	176.003	133.673	106.205	168.279	204.325	192.873	131.627	281.157	165.701	156.401	133.226	173.386	101.255	106.441	203.159	269.463	137.314	38.6568	35.399	42.7415	21.6851	39.4693	265.064	330.23	137.928	62.975
ADCY5	28.5264	73.895	74.4029	136.751	143.506	44.7262	50.7425	100.821	21.8759	67.6354	29.8663	156.839	85.1888	32.5321	66.7214	99.2064	242.567	216.518	97.5681	183.85	119.788	74.0622	74.8465	87.131	85.0626	62.6465	176.182	24.156	126.998	21.7054	27.8304	29.9104	103.359	107.773	27.8763	29.5281	15.7475	108.975	116.849	169.538	20.5705	12.2947	72.7161	27.7125	104.927	161.412	101.965	30.6385	30.9027
ADCY6	115.874	93.6061	139.3	122.624	89.8123	103.621	105.133	30.2714	130.449	183.189	70.9805	255.248	44.9583	73.2242	167.916	184.282	72.8844	258.215	25.999	128.982	108.679	101.044	184.912	107.235	110.152	149.208	157.513	84.1422	157.83	103.168	193.901	112.119	125.027	126.556	27.545	55.855	95.6309	142.527	120.095	151.93	70.3032	149.485	129.378	194.866	201.922	139.905	66.6915	205.43	104.776
ADCY7	4466.09	4568.27	4188.73	3842.36	3962.61	4131.62	3940.07	5473.33	4174.72	4827.5	5115.96	3542.98	4477.66	5575.56	4795.04	5590.58	4817.59	3834.16	5345.26	4757.36	4786.31	3662.93	4459.29	5974.18	4708.61	4357.91	3954.99	4032.03	3614.59	3827.99	4349.21	4705.63	4241.26	4944.52	4221.85	4739	4223.37	3241.95	4082.27	5227.03	3919.58	3466.27	4361.22	2679.13	4575.46	4792.24	4025.77	5352.07	3874.37
ADCY8	4.21113	9.91411	19.9551	9.96521	17.4873	33.099	3.67298	28.0275	27.643	12.973	14.1734	31.4179	59.5622	45.0572	12.3916	5.76081	5.16749	13.9586	7.10081	10.5421	8.56782	7.33288	11.3377	13.7045	42.6633	30.9072	5.88757	5.63139	5.40584	34.5647	25.8637	5.66642	5.52962	6.65676	4.86106	3.54009	5.23429	8.28276	5.44191	62.5335	50.0533	18.7529	46.1538	20.0637	44.1049	51.9747	8.39012	41.1955	4.41178
ADCY9	521.346	368.328	362.876	501.814	462.366	467.038	325.736	520.962	350.243	339.27	462.962	383.187	208.685	642.961	255.674	387.193	397.106	281.118	482.679	476.965	517.491	202.693	502.687	382.973	345.271	433.535	606.934	253.615	329.221	267.457	526.516	375.665	668.484	247.231	417.255	644.996	407.453	363.239	383.189	388.036	366.716	474.067	521.707	385.911	435.168	716.139	743.538	648.541	438.374
ADCYAP1	33.8421	149.015	45.6997	86.3331	54.7642	91.4967	33.9103	66.5451	101.197	89.8777	129.133	169.586	121.423	95.0742	103.464	135.552	27.0748	70.8081	128.796	130.224	103.415	105.657	94.1629	13.6535	39.5428	33.075	102.859	96.7344	100.361	101.358	96.4425	61.4265	11.2548	16.5521	102.853	15.9813	23.6048	66.2183	12.0831	137.234	69.982	21.0457	14.3595	10.261	92.4382	27.5441	7.73993	19.2895	16.4894
ADCYAP1R1	157.453	293.285	158.854	184.188	141.563	96.4809	144.194	137.486	170.286	189.611	169.436	200.188	281.87	292.265	338.022	216.87	213.116	285.331	282.141	208.374	218.819	197.332	253.705	203.839	177.761	210.564	121.771	198.001	171.29	285.948	208.233	260.579	139.814	111.616	98.5428	155.885	118.87	181.076	165.478	104.647	166.265	266.644	190.231	159.902	171.146	119.352	131.886	147.471	87.3898
ADD1	2350.08	2923.7	2542.77	2494.94	2608.94	2470.45	2779.63	2681.38	2540.81	2154.62	2314.95	2279.17	2234.27	2259.19	2153.86	2325.34	2241.19	2365.68	2820.83	2537.75	2148.03	2590.6	2418.25	2021.37	3060.95	2397.43	2396.43	2426.93	2259.83	2554.13	2218.62	2217.08	2835.04	3549.91	2937.08	2496.25	2466.54	2250.55	2557.58	2608.74	2480.06	2146.5	2580.96	2410.34	3229.72	2757.47	3409.07	2803.18	2973.44
ADD2	126.545	312.522	153.955	156.466	199.769	82.5997	141.385	176.256	208.213	178.77	234.083	114.588	195.505	56.9444	297.983	216.381	242.275	290.489	28.1925	187.348	155.755	91.6763	105.051	145.115	98.0252	136.11	125.24	91.7694	136.795	92.3975	212.16	127.782	90.5819	119.459	115.644	19.6167	80.5198	20.9073	180.319	40.487	189.802	7.87596	9.89549	242.58	98.2113	81.3281	17.7596	104.21	208.129
ADD3	9492.28	12653.7	13523.2	9977.88	11396.5	10257.3	13891	9788.44	11232.1	9144.66	10474.6	14717.4	10404.6	11576	11316.2	10396.1	10380	12430.6	9809.91	12284.8	8458.54	11397.6	7438.83	7347.48	9173.58	10598.8	12642.6	9649.75	10742.2	10131.1	9282.3	9583.14	10312.5	14309.3	13515.9	12153.4	12874	11831.6	11215.6	13838.9	11412.4	10260.7	11264.1	19570.5	15530.8	11339.5	10724.7	10358.6	16940.5
ADD3-AS1	11.3025	71.6354	19.4086	34.2578	27.0985	6.03422	18.2378	38.401	46.2113	15.4298	37.2428	7.21831	57.9577	5.0032	19.0126	34.7918	29.144	88.3729	48.1934	7.23614	19.0719	8.03661	57.928	17.722	4.65174	29.8281	3.37254	13.3916	26.2587	18.4906	26.4065	11.3364	23.1465	43.7147	30.5936	21.7534	46.0661	71.2437	2.41829	21.0428	50.2186	4.45043	70.8498	55.8165	31.8967	10.5482	42.3845	39.8979	35.1669
ADGB	6.30378	16.3435	12.7017	15.6222	14.6411	3.48983	31.7381	18.7309	3.7936	9.92582	32.9437	15.0275	24.9908	5.29225	55.7712	39.796	10.3212	32.5972	63.9344	10.7363	4.62117	10.7136	13.195	2.71884	4.74995	31.2076	55.1526	25.1293	19.8262	5.67135	29.5415	17.4317	39.0905	29.3014	25.8943	41.8294	6.27762	4.90749	33.1014	15.6358	1.14779	2.79379	4.82633	1.7042	24.0842	2.64978	33.7536	2.1013	4.06942
ADH1A	67.0377	90.2586	116.696	95.0382	82.5331	86.1562	98.9816	99.9711	99.1064	135.809	113.851	138.632	34.3146	64.7533	162.489	91.1963	125.714	66.4182	68.8973	96.2634	141.877	73.2228	156.433	136.652	129.552	105.767	160.194	132.429	103.89	60.4619	64.8326	165.901	64.3036	8.57602	74.3529	9.17126	58.6295	160.427	63.9275	68.1052	50.2225	49.0535	81.7282	36.7971	60.0416	68.9722	91.3776	65.7821	78.9908
ADH1B	35.8344	23.428	58.6563	89.4438	12.7534	34.3645	31.9707	11.6455	22.6607	47.3918	19.5882	16.8648	30.8851	20.1891	60.0927	64.5591	72.4897	102.9	26.8576	21.6899	7.11886	43.5759	43.1257	45.8575	14.5819	77.7458	19.0277	25.1588	29.4103	20.9815	19.7203	16.5646	41.2292	9.81133	6.5446	9.20588	55.4018	80.8845	18.8818	29.1895	16.9237	1.72917	18.1605	26.3226	16.8278	7.62684	53.042	20.9131	73.6387
ADH1C	7.67293	59.8499	17.5628	22.9635	9.41844	16.2605	10.493	10.941	27.7896	8.60664	9.41146	6.89351	12.4344	10.1224	80.078	45.6623	71.4654	8.02924	13.548	8.38699	17.2978	10.4436	50.2164	17.2465	43.0546	14.5309	29.6926	21.2506	20.3664	9.87784	10.1333	34.9079	8.35016	1.93975	10.5457	6.56083	57.6125	56.3496	65.6092	11.3544	6.64905	12.6178	27.4085	15.6507	6.55388	11.8574	6.16217	11.0765	7.4317
ADH4	195.223	689.052	185.521	238.792	135.905	149.99	255.746	141.833	263.884	91.8824	171.898	142.396	167.636	151.919	433.929	223.406	302.957	129.502	97.9499	281.234	232.33	112.323	120.013	106.258	190.035	147.427	181.024	194.438	87.5211	127.539	65.0696	123.292	173.985	156.23	119.755	147.679	95.1723	114.356	275.295	202.788	214.95	135.656	26.2978	73.6526	168.285	170.745	191.182	87.9214	162.772
ADH5	1879.23	2010.67	1969.65	1923.54	2031.83	2029.36	1835.51	1500.33	1528.27	1186.74	1650.16	2504.59	2020.95	1910.94	1789.15	1839.14	1826	1847.91	1840.97	2068.38	1657.48	1436.19	1421.07	1599.48	1724.63	1854.91	1878.76	2356.26	2122.96	2075.4	1636.65	1573.2	2362.38	1823.49	2424	2510.04	1792.13	2638.61	2149.03	2578.45	2155.42	2221.65	2029.27	2368.09	2324.67	2232.63	2397.22	2314.81	2448.4
ADH6	104.19	144.99	63.2273	86.4779	33.8022	11.5465	110.047	17.0263	150.113	108.073	34.9302	142.798	86.3625	265.958	226.871	70.3039	156.479	174.825	88.803	83.2271	127.602	73.76	109.612	35.6156	25.0091	173.055	55.6487	169.858	85.4123	33.8796	89.9184	21.8022	142.152	20.1803	36.2646	73.4466	32.7916	68.2705	92.5595	129.897	224.922	36.3764	30.0025	87.4957	95.9343	126.166	35.3516	48.687	119.185
ADH7	36.1828	92.3415	64.8591	59.1518	23.5522	64.3016	9.18852	15.9044	48.9826	72.5323	47.4773	61.215	90.8051	91.6075	84.1901	35.7553	91.2267	26.2145	82.5839	62.9804	116.57	64.0045	58.1635	18.7441	58.9341	58.6766	51.7037	112.708	83.657	88.9894	71.9605	50.9848	35.0416	49.1904	42.8782	41.004	64.3994	30.5481	56.377	101.606	63.2126	61.9497	83.2649	135.871	125.567	44.3701	56.5546	65.0436	43.7467
ADHFE1	840.13	495.143	637.665	564.803	797.402	542.986	632.821	504.542	646.005	676.342	796.325	346.985	668.228	500.589	669.452	601.124	471.607	573.63	637.376	633.406	553.397	414.621	378.673	593.66	442.007	796.071	541.504	550.119	498.376	634.207	534.822	438.224	432.303	388.796	444.853	327.472	391.756	759.863	541.997	504.09	487.185	399.189	434.482	521.084	585.45	386.478	559.849	681.01	574.121
ADI1	4042.72	4223.78	2834.48	3304.18	3340.59	4661.23	3336.3	4061.48	2633.36	4138.45	3398.95	4081.2	2997.98	2595	1652.72	2221.37	2629.93	2254.23	3462.67	2179.73	3483.97	1623.99	4459.3	3588.54	3037.48	3390.07	4272.23	3390.05	3354.46	4118.33	3853.4	2739.39	4536.51	4416.59	3982.42	4655.39	4868.92	3546.72	3693.29	2891.46	4497.89	4516.14	4585.1	4568.15	3469.73	5029.99	4238.3	4174.86	3785.67
ADIG	22.2987	12.7725	28.402	18.9156	14.7389	31.7667	21.3054	13.7039	26.3399	43.8779	20.2402	62.3836	67.5483	20.7365	22.4711	23.3259	39.6396	33.9721	13.7873	13.2399	35.7938	107.682	27.3742	30.1556	96.3478	28.5458	28.6072	14.8648	16.8848	19.8644	20.6195	12.1766	18.0201	14.6092	18.4202	89.6289	18.4729	64.1806	16.5117	32.1914	28.3971	14.3748	41.7972	22.5819	30.5289	12.6234	23.2971	22.9007	37.3584
ADIPOQ	35.6301	72.8505	21.3655	16.5439	51.4039	27.7368	33.3952	17.5491	47.8124	50.5346	34.6364	86.5648	144.38	20.4731	63.2166	63.28	52.3404	42.3405	54.073	62.9916	84.5117	61.1142	60.8067	28.6466	93.5678	60.9586	88.3764	17.0163	79.6681	37.7162	28.8587	31.6965	27.4584	35.1949	33.9339	39.0458	40.5604	74.8536	18.209	43.8572	53.5074	41.9818	31.7791	65.2789	27.1158	32.5245	57.6963	3.36285	8.84765
ADIPOR1	2472.36	3768.97	3492.26	2669.55	2456.51	3610.46	2483.27	4157.99	3329.97	3932.04	3238.26	3416.35	2724.76	4058.58	3376.21	2941.27	3856.26	2805.96	3480.13	3332.36	3796.15	4395.13	4753.53	6264.48	2981.55	4287.31	3408.61	2851.06	3024.4	4191.98	3236.81	4389.49	3998.71	3684.18	3000.02	2837.47	7336.25	4236.04	2673.82	1685.48	3201.15	5282.97	3541.6	3631.59	2291.49	3411.52	2196.9	8138.84	3515.15
ADIPOR2	1092.43	1124.97	1075.98	1110.45	1233.54	1328.27	1044.3	1049.92	1333.45	1120.92	1635.14	1201.38	1319.62	1751.21	1450.87	1513.27	1281.14	1124.18	1527.9	1531.92	1519.87	1162.28	1367.65	1305.72	1208.61	1402.23	1662.17	1327.75	1389.51	1196.65	1436.41	1410.39	2021.79	1733.74	1429.93	1668.02	1098.24	1542.75	1345.46	1291.8	1259.37	1863.26	1677.73	1721.95	1399	2053.5	2026.2	1575.2	1219.25
ADIRF	9.74227	7.00999	6.72124	8.27935	10.1904	9.10837	9.41136	5.1818	4.37953	10.8474	5.91572	10.6401	33.1763	11.879	8.70866	17.5922	5.93259	8.94619	10.1892	7.93978	10.1166	10.8149	10.9429	12.7582	28.3469	9.44183	12.4791	20.5465	18.7249	9.14911	15.3549	11.735	12.4261	13.3748	10.2171	9.04581	11.5816	14.4299	16.9834	15.0017	13.1812	11.7039	11.8609	65.9854	9.19108	14.716	11.378	6.8309	32.4382
ADIRF-AS1	102.012	202.853	176.65	152.995	203.15	48.3519	193.418	158.958	172.731	160.484	297.551	130.537	202.577	161.792	154.071	96.4878	207.766	165.678	251.223	180.498	132.543	156.66	72.3537	152.72	110.959	218.488	108.432	148.72	179.97	159.542	70.3415	128.14	119.905	152.232	149.685	77.0504	97.6456	205.965	206.86	202.518	158.215	225.304	212.894	21.5689	160.251	66.2809	40.9766	147.501	217.024
ADK	1378.8	2226.06	1723.73	1435.35	1404.63	1460.12	1633.04	1254.82	1414.29	951.809	1128	1504.91	1389.98	1161.08	1478.25	1960.48	1163.33	1458.18	1044.32	1471.57	1018.96	1242.6	998.145	928.635	1930.84	1533.57	1671.96	1436.62	1387.59	1059.25	1098.44	1095.3	2636.05	1742.45	1969.15	1472.31	2090.61	1159.73	1847.68	1906.33	1633.15	2115.76	1335.91	2093.01	1966.58	1495.29	1221.28	2405.75	1821.35
ADM	356.904	343.926	347.873	312.486	185.909	375.817	235.731	809.416	374.972	564.687	551.701	426.13	200.596	272.285	436.691	442.069	316.628	642.246	392.852	279.472	929.817	5664.66	853.073	3005.88	375.875	1944.43	1163.25	1102.45	260.57	980.876	730.188	2304.13	4202.42	1489.32	867.434	969.286	1709.63	2735.1	1349.32	675.773	779.205	636.049	2203.23	1020.65	494.651	841.592	1278.71	1218.64	523.163
ADM2	41.7539	40.9536	39.9052	52.6731	50.7771	39.2485	36.6375	45.6211	40.3195	42.2381	49.5461	47.9561	56.664	46.3599	63.9556	38.0072	48.2128	50.3594	49.734	54.5039	59.4966	46.9858	147.414	155.385	48.941	44.2055	32.8723	43.0317	40.5026	52.1125	54.1402	47.1754	64.3585	130.593	70.4984	89.2105	38.9298	45.9433	69.7527	89.8952	74.0259	63.6088	49.9417	68.3431	56.3499	55.4011	58.3443	51.9327	274.063
ADM5	23.7338	18.5273	32.2094	27.132	12.0599	8.78279	8.94899	28.5367	7.30835	27.0256	25.1578	10.3134	66.1728	41.4461	18.6173	77.226	44.0957	30.8098	12.3669	52.2815	25.7399	34.4794	32.7881	16.4308	85.5139	28.5949	19.5225	27.6449	11.2351	10.7309	27.9119	14.5839	42.8593	8.94412	20.6038	70.8414	86.965	69.3026	39.673	43.3342	32.5766	9.21733	103.821	30.3932	42.9531	30.0185	60.5236	12.062	32.9437
ADNP	2665.49	2866.26	3069.73	2801.54	2990.99	2929.07	3365.52	2705.52	3291.63	2596.55	2962.74	3533.96	3490.06	2996.55	3276.2	3556.4	3694.42	2415.88	3672.82	3265.22	2792.06	2782.32	2508.34	2658.38	2802.24	3435.68	2242.07	3107.65	3300.7	3022.33	3347.34	2793.43	2164.09	1569.22	3548.12	2189.38	2905.29	2020.17	2475.66	2894.13	2422.52	2255.55	1978.95	2822.49	2442.39	2552	2394.14	2008.6	3221.83
ADNP2	904.97	1310.76	1681	1158.99	1193.49	1076.95	1490.72	905.213	1079.06	1318.73	1041.28	939.34	1129.92	1038.35	940.367	1133.62	1148.07	1539.92	1173.11	1100.79	1114.62	969.492	1091.47	947.841	1183.13	1214.2	1152.61	971.236	1072.17	1075.37	863.114	693.807	814.387	1306.56	1102.4	922.642	836.102	1470.92	1104.68	1313.2	808.364	934.788	1163.15	1210.52	1128.21	856.473	1013.36	877.156	1056.55
ADO	1258.8	1219.33	960.061	1129.53	1060.29	1660.68	1405.48	1443.36	1196.71	1122.63	1057.98	957.362	1171.95	1846.95	949.916	1260.87	1084.77	996.654	1117.42	1211.92	1355.36	1056.26	1207.58	1555.34	1279.62	1215.46	1288.08	1268.29	1496.02	1550.67	1471.82	1368.99	1097.92	954.877	1231.92	1081.98	1230.77	741.039	933.37	1012.82	1235.91	1124.23	953.603	944.951	1023.39	1243.85	826.737	1128.83	1039.54
ADORA1	191.568	177.984	137.222	144.351	162.903	167.783	96.8588	92.7613	146.339	176.356	163.476	162.854	156.427	246.363	196.939	191.383	190.503	225.596	194.591	177.122	309.753	54.4743	245.292	134.21	218.427	226.489	147.704	85.478	141.067	205.981	113.09	164.168	246.407	103.957	137.527	157.416	204.199	181.979	174.642	154.1	201.866	253.87	56.3385	94.7626	133.481	134.903	252.418	199.931	174.624
ADORA2A /// SPECC1L-ADORA2A	650.964	657.367	734.286	540.699	537.924	562.966	836.885	437.654	765.9	615.554	474.758	595.509	737.288	599.048	540.629	582.758	716.811	488.841	554.233	733.587	522.594	856.005	451.477	383.324	628.663	625.251	459.871	628.191	721.992	670.81	526.82	430.482	507.911	1101.98	1045.65	799.432	535.022	494.79	802.241	1043.37	932.841	438.348	654.398	1065.68	1237.93	718.817	643.167	626.551	1204.41
ADORA2A-AS1	41.4479	87.6221	12.9103	74.7658	13.2008	8.84635	61.0852	47.5421	76.1255	11.2418	10.9302	127.921	28.7051	15.3609	52.0975	27.0897	66.7165	64.7261	24.5924	49.8504	14.9021	36.8003	15.9821	97.9525	24.1869	17.4208	7.28674	66.2258	13.0321	15.4994	31.0423	12.4609	90.0953	15.3342	35.1075	6.54465	51.0121	24.2537	41.3411	17.3527	42.8745	31.5291	21.2446	79.5702	11.7991	11.163	57.7948	8.12515	5.57698
ADORA2B	257.188	350.636	211.045	224.405	259.673	306.72	287.03	455.392	224.384	389.198	322.27	292.709	201.806	414.044	339.547	279.675	376.697	311.894	187.657	294.991	312.265	160.894	238.824	349.165	133.334	305.26	200.048	394.095	335.242	347.875	382.315	275.622	364.827	446.268	441.315	509.106	659.563	309.79	338.556	351.292	686.128	406.51	399.965	299.565	429.589	501.927	319.721	462.856	431.664
ADORA3	48.3171	54.2405	38.6602	54.0697	52.45	50.5823	46.2821	34.6875	83.2846	56.6898	158.288	43.7268	96.3714	70.3996	47.6807	10.7156	24.8451	102.748	12.2356	72.1528	57.1414	53.3838	464.828	1835.15	118.447	430.556	13.3378	143.286	73.523	30.7803	9.89264	112.664	354.074	62.143	47.9992	43.2529	161.965	439.301	98.9559	74.2014	142.894	1445.83	229.887	189.75	41.8912	610.948	236.095	475.404	3.25545
ADPGK	3081.89	2615.83	2724.82	2838.87	3193.71	3122.65	2708.58	2679.99	2672.67	3052.02	3820.52	3873	3981.18	3676.37	3697.37	3012.11	3195.41	4500.79	3944.06	3356.74	3075.62	2522.98	3127.94	3493.97	3419.2	3471.69	3701.85	2769.23	3556.19	3117.9	3541.38	3758.47	3685.56	3619.33	3392.29	3568.62	3737.91	3245.9	3106.5	3281.21	3743.4	4201.08	3629.48	3095.34	3315.67	4015.8	3396.41	4013.16	3213.78
ADPRH	346.283	283.753	286.942	376.749	319.035	382.503	239.968	383.754	411.327	518.065	379.023	392.498	426.058	403.01	479.718	202.723	365.527	377.486	657.329	252.376	363.055	189.373	573.884	604.462	530.327	476.262	260.128	559.481	462.064	559.318	623.851	756.209	313.691	295.678	234.394	375.145	492.141	242.57	275.469	255.148	360.629	453.378	332.998	82.1332	253.925	283.232	214.945	253.899	146.986
ADPRHL1	167.615	109.972	20.0302	104.463	86.8448	30.026	84.4347	147.804	74.0651	129.411	25.6075	123.493	182.776	188.672	195.302	128.481	154.044	30.4164	51.4894	124.027	91.0937	203.669	26.3428	29.688	176.764	35.6925	79.9076	64.5898	76.0021	29.2604	75.7716	101.911	32.1858	85.5984	142.401	131.198	97.8724	25.9672	115.404	81.7523	97.0029	184.894	272.929	167.049	74.2133	82.048	23.4872	193.244	27.8948
ADPRHL2	905.951	864.363	729.888	706.206	886.049	1054.01	842.388	791.006	691.228	899.617	709.997	569.92	686.17	551.432	806.936	800.116	607.464	516.574	711.156	551.311	845.373	1005.5	773.075	782.364	834.473	749.699	704.799	1019.66	849.774	894.083	837.177	1053.12	1260.49	1486.42	1491.84	1695.51	1079.67	670.545	1283.86	1505.66	1600.38	1036.86	1012.62	1334.63	1758.84	1152.26	1398.08	1278.66	1711.5
ADPRM	903.124	988.416	1001.02	1088.08	1355.53	980.251	1454.31	754.297	910.975	684.634	764.236	1138.16	1006.91	617.31	855.789	755.199	810.462	948.363	732.5	855.074	750.849	718.002	487.205	414.505	474.519	953.281	893.549	798.643	797.148	1218.6	807.85	666.754	776.672	702.384	1124.33	646.334	914.514	987.568	1039.69	1024.99	714.2	465.605	653.718	1145	758.781	609.1	635.575	620.665	1111.27
ADRA1A	16.8301	18.1606	12.5695	27.5428	77.0288	12.058	64.8844	15.0007	16.0396	73.4431	9.74911	118.621	22.7536	120.706	170.875	22.0853	97.9466	129.581	78.9694	93.0456	10.953	56.7644	67.3968	64.5641	14.3668	20.5586	128.784	55.1829	22.0206	15.8017	13.2925	78.1616	10.2146	11.1447	8.44739	25.6368	40.7871	17.9644	60.341	81.3794	9.20869	30.6098	12.2818	50.7167	150.988	11.0104	12.0864	15.1927	77.8379
ADRA1B	32.7914	11.3439	25.7393	13.7438	16.8866	13.5783	18.7343	2.18086	27.2037	36.6827	22.7034	85.7244	42.6126	32.2747	20.7905	29.5781	49.1047	16.5333	34.1608	45.4393	39.4784	20.0416	9.81327	32.5005	39.0563	23.2082	8.84679	20.9868	11.1513	41.9322	20.7695	7.2973	61.3778	52.7424	2.67281	19.2764	10.4477	4.19912	70.5116	52.2628	14.1722	11.1093	28.6845	155.77	40.1005	16.0461	5.2007	39.9702	98.5331
ADRA1D	9.87521	12.1854	18.5074	42.0251	52.63	22.5889	11.2709	12.3158	14.9071	63.4302	46.3021	11.5457	45.2667	19.9896	67.8684	18.399	79.6282	39.31	10.2533	51.2409	40.8233	28.5385	51.4288	43.1983	62.8417	16.4279	95.2048	68.2461	2.75422	30.2732	50.9956	34.4378	9.3165	9.1721	2.95626	14.4466	19.6507	14.5957	73.181	5.15274	21.6364	2.85263	68.0753	104.048	83.9941	24.6699	14.3918	79.4402	55.1979
ADRA2A	81.5064	109.414	162.557	126.072	136.87	143.005	167.403	185.208	175.362	262.31	100.818	136.277	120.558	123.718	151.399	215.125	176.019	191.904	106.191	157.825	166.492	143.185	163.701	136.051	18.8419	76.366	92.1271	117.492	101.548	65.442	151.772	127.511	115.217	155.951	78.4871	81.624	57.4666	99.0213	185.043	58.6009	105.176	173.576	89.377	121.845	128.392	64.0603	118.331	119.826	91.3005
ADRA2B	132.892	40.5027	27.0998	85.3884	77.6392	118.632	72.3191	155.262	82.1767	150.63	105.048	212.972	103.132	98.2623	87.6151	58.6018	121.581	172.53	85.3667	45.3421	142.764	86.0019	140.506	84.2173	50.3511	139.304	129.832	154.882	138.778	72.697	81.6033	54.2561	104.124	148.977	211.461	74.4109	18.4792	96.1203	27.4276	144.321	12.7257	70.0999	136.398	127.332	136.807	132.093	142.08	146.401	157.732
ADRA2C	15.9426	102.095	56.2005	13.914	16.8999	84.1317	23.7322	49.1405	37.7536	90.0384	25.9855	18.4366	60.5907	11.028	14.3716	44.1825	68.0156	30.6323	8.20534	53.7963	37.8782	28.5289	33.6946	10.6995	11.4094	45.5108	115.776	113.315	19.8091	53.0282	11.923	21.9731	170.465	82.9331	49.6121	5.63915	170.001	183.952	94.2112	46.3635	140.036	140.367	99.2406	32.7955	67.2563	97.7505	86.8192	136.147	25.7544
ADRB1	43.8583	20.9062	38.463	28.2086	39.3902	31.2683	82.5739	62.8418	61.5963	80.3575	16.5367	35.4869	71.4215	99.1333	16.1419	192.704	71.7346	21.5264	33.2102	62.6299	104.166	154.149	113.92	115.09	94.3336	22.4566	92.5348	102.498	42.3705	117.232	128.028	139.201	7.48364	74.4038	46.9666	30.0701	70.2509	193.615	49.9627	69.4153	73.3426	43.4217	67.7634	48.0001	89.5567	175.781	19.2227	105.614	78.754
ADRB2	1885.14	1503.7	1186.27	1009.55	1173.7	1569.62	1877.8	2133.66	1195.37	1860.41	1745.69	1846.86	1630.38	2860.09	1602.6	2171.73	1556.33	674.687	1717.96	1981.26	1353.97	1535.33	1118.89	1190.98	1276.35	1385.95	1197.51	1162.93	1262.41	1000.54	1325.36	1328.82	969.803	496.72	973.757	1957.97	1318.49	979.645	844.39	1015.9	1252.36	1841.03	1000.25	1068.16	1121.7	2400.4	902.839	1800.16	1065.72
ADRB3	6.88363	16.8389	18.2888	17.642	8.7099	44.8356	14.9469	7.13183	58.2524	39.3738	103.031	29.0923	63.6576	9.97642	136.486	10.0051	69.9038	71.8978	94.2186	16.4927	23.802	65.3874	125.769	21.4941	88.0691	51.6338	47.5935	40.0112	80.1048	51.4411	50.6818	77.2156	6.67831	18.7588	35.144	57.8571	14.3552	79.3626	46.7504	23.8839	62.0963	12.6115	14.3139	18.8429	8.58003	15.8232	53.9469	30.6912	14.7696
ADRBK1	1266.22	1970.14	1803.46	1704.49	1615.66	1744.75	1565.81	2131.23	1946.91	2292.3	2050.16	1482.84	1215.85	1523.02	1968.57	1888.6	1860.92	1660.23	1314.28	1486.51	2104.86	1593.12	1550.06	1715.82	1338.06	1784.18	1955.26	1024.75	1609.65	1644.27	1729.47	2005.82	2472.87	2627.43	1834.65	1563.46	1921.27	2102.75	1919.96	1089.73	1494.25	1957.62	2172.96	1440.44	1415.9	1631.6	1887.29	2253.4	2079.92
ADRBK2	1660.43	1254.66	1074.7	1049.02	1229.13	1282.54	1289.26	1558.61	1277.47	1338.51	1516.95	889.724	956.292	1537.62	1182.2	1319.46	2029.1	1080.45	1377.15	749.932	1159.03	725.394	1764.66	1194.23	1782.34	1193.67	1016.49	660	1510.66	1294.53	1672.43	1325.73	1450.2	1162.71	1064.34	1307.09	1345.03	595.741	1318.84	979.306	1247.69	1209	1208.52	704.34	755.184	1507.94	617.928	1292.32	784.086
ADRM1	1540.89	1837.39	1696.75	1491.2	1506.6	1905.27	1685.15	1705.23	1613.06	1609.15	1283.33	1188.7	1113.24	1359.55	1177.79	1348.35	1232.62	1452.43	1389.21	1297.41	1563.24	1615.35	1921.43	1907.8	1729.71	1848.29	1462.29	2108.07	1717.63	1795.08	1835.13	2046.54	2323	2856.94	1989.01	2032.8	1831.67	2197.49	2204.38	2555.47	2245.37	1832.47	2692.47	2116.51	2446.99	2145.28	2669.86	2120.46	1787.85
ADSL	2312.89	2285.46	2624.09	2686.87	2505.9	2534.6	2753.38	1862.52	2284.05	1861.04	2282.01	2929.83	2468.61	2127.14	2444.93	2205.6	1839.75	2725.63	2413.24	2444.94	2064.83	1988.74	2154.18	1998.86	2554.03	2328.28	2559.56	2703.47	3179.77	3208.49	2972.16	2064.72	4150.16	4311.62	4557.51	4605.98	2839.65	2795.07	3487.03	3922.63	3560.91	3805.1	3793.5	4863.73	3920.45	3773	3498.45	3815.93	5164.56
ADSS	3021.03	2452.22	2462.14	2921.27	2773.52	2909.31	2597.61	2602.22	2558.54	1944.35	3640.48	3523.09	2970.04	2550.75	3295.93	3552.74	2916.01	2608.41	3480.08	3243.37	2618.93	1947.8	2497.19	3057.41	2920.53	2430.54	2717.51	2765.63	3280.81	3360.34	3520.89	3559.42	1889.09	1455.65	1947.35	2156.15	2514.78	2138.94	1534.9	1660.29	1723.37	4523.45	1575.15	1778.85	2162.33	2200.21	1681.54	1376.23	1496.34
ADSSL1	114.174	133.89	154.462	110.275	90.7482	155.549	118.109	54.3793	96.1707	80.077	101.726	30.5417	19.4153	13.9157	127.377	200.884	206.174	124.301	129.255	114.358	147.423	60.2058	212.904	130.758	59.0654	205.127	236.659	45.7273	67.8533	153.409	143.342	71.7221	288.75	158.813	36.5925	116.38	113.443	118.154	31.5598	55.9192	51.3117	135.782	194.583	19.7999	13.7693	207.787	114.945	120.71	223.392
ADTRP	593.082	463.652	308.351	694.543	1038.53	486.754	815.299	427.127	473.824	165.876	424.284	574.91	809.896	189.514	1162.56	470.036	1121.41	901.778	679.047	969.204	293.561	792.142	122.308	210.974	360.727	345.878	1099.77	566.683	836.742	937.523	583.235	279.318	297.046	801.099	689.109	464.802	954.978	324.207	639.613	571.658	551.417	227.545	192.696	1128.47	560.789	99.8259	424.333	206.157	1405.61
AEBP1	47.8934	145.715	145.876	35.9711	157.282	41.5503	70.4611	63.9277	46.3397	81.8276	82.7323	27.0536	137.003	125.908	155.926	160.685	146.11	116.346	125.836	148.346	73.3298	112.006	151.704	23.2422	259.496	248.6	25.9723	50.2551	81.6712	88.0098	147.447	59.7306	233.122	269.711	193.975	99.7983	118.93	107.398	156.461	218.627	80.9352	37.7652	106.248	68.6839	142.487	114.45	103.621	99.9491	315.924
AEBP2	1218.88	1195.55	1291.11	1208.62	1244.37	1153.21	1411.01	1054.33	1347.2	1138.76	1028.05	1384.33	1484.92	1231.2	1463.59	1791.67	1251.48	1228.07	1488.83	1979.03	1118.31	980.316	1026.72	1246.9	1142.22	1112.44	1415.47	1412.22	1622.48	1255.14	1560	1244.68	578.079	639.621	740.896	622.771	1232.03	1323.09	720.905	763.121	710.221	703.837	605.202	692.215	819.997	599.657	613.714	559.066	680.948
AEN	353.15	483.752	317.739	290.838	562.422	339.45	391.718	310.17	333.874	253.041	303.018	361.614	522.524	477.661	244.268	316.717	243.331	451.644	304.351	413.407	244.702	398.527	300.319	257.747	314.437	382.957	348.473	581.583	532.918	423.782	508.235	213.06	213.695	573.163	393.729	366.482	475.726	456.614	301.323	490.657	500.646	250.001	340.357	682.591	315.06	223.116	476.948	344.234	510.773
AES	3795.95	4395.43	4145.84	3549.47	4011.09	3530.66	4417.89	3885.35	3313.63	3334.46	2402.53	3065.05	2885	3453.45	3161.87	3524.08	3161.71	2732.8	3380.74	3157.4	3588.92	4153.82	3285.77	2145.04	3368.92	3631.97	3280.5	4363.26	3246.17	3532.23	3136.6	3445	2531.61	4646.78	5280.04	3991.27	2731.13	3450.55	3612.09	4578.17	3802.29	2218.16	3161.73	4533	4583.01	2534.48	4597.63	3252.97	5384.87
AF001548.5	135.121	162.195	254.932	268.509	81.8095	121.027	180.437	447.729	240.342	353.078	207.773	187.809	113.86	136.659	430.216	365.187	172.234	400.329	175.973	205.717	487.391	418.654	161.692	147.158	127.458	189.93	173.093	342.574	207.29	176.51	300.699	384.853	500.089	391.85	340.919	493.436	356.788	211.66	349.881	217.881	133.96	102.824	462.256	311.014	457.122	153.047	223.504	481.348	288.362
AF086294 /// RP11-485M7.3	8.64531	16.2009	10.5829	6.76498	10.8143	7.51637	16.4305	82.5213	56.3833	14.8357	7.17756	37.1055	26.201	4.38881	36.1191	13.702	19.2995	37.2548	67.0801	27.0164	14.8698	7.24097	9.27218	14.5249	11.6803	6.89137	10.9355	12.5633	18.4844	55.282	7.57924	10.0993	14.4541	29.1318	12.7511	11.71	5.11266	19.8658	9.16535	10.2045	8.94718	12.1768	14.9986	6.18226	14.4516	10.2029	6.64459	12.5042	16.044
AFAP1	223.955	110.251	118.879	100.396	93.3097	49.4031	42.7701	36.1908	239.263	160.94	73.068	100.341	61.4255	43.5838	82.0525	200.608	125.218	118.101	92.8761	114.555	181.869	155.916	131.631	75.6484	102.342	61.1763	40.0584	71.5399	64.2747	32.4637	78.7071	35.1467	26.8209	24.843	37.0938	77.2994	161.297	65.1979	32.6997	55.264	51.3957	47.1447	5.25724	60.7838	93.8311	61.3582	19.5009	41.864	39.7878
AFAP1-AS1	115.063	136.884	167.703	17.6347	60.7854	140.584	99.4004	150.488	125.664	248.748	163.776	101.963	138.169	56.3775	48.8346	69.4735	117.433	69.0709	152.263	123.079	72.7707	97.5331	71.5486	55.8519	83.3783	89.0492	76.4811	156.541	68.4304	98.0084	94.3172	38.3726	70.6887	130.387	48.3669	161.569	104.103	145.902	94.7348	122.73	112.578	192.827	33.6141	59.1811	109.576	84.8371	148.109	42.3006	140.822
AFAP1L1	105.986	12.8865	36.5523	60.0379	8.47283	15.0239	47.2462	21.3348	20.0881	73.0312	17.3458	18.3967	58.2888	26.7605	146.531	22.4423	129.772	82.9103	86.5753	60.5404	72.5056	56.6885	7.69752	60.3373	13.9114	59.2678	174.43	17.6767	26.8969	27.6482	76.5794	81.1753	34.7581	14.4374	79.9395	17.6662	130.202	113.354	102.192	75.7484	20.772	115.724	63.2388	13.5783	46.9693	124.428	63.0246	162.59	50.9312
AFAP1L2	90.3118	78.5638	100.301	128.471	49.2249	95.5527	105.44	64.9129	126.764	91.3181	122.463	121.63	179.103	101.572	141.363	167.398	132.614	121.867	100.782	137.513	113.798	97.7299	84.5536	76.7476	88.629	177.019	89.0101	107.302	95.796	88.4652	56.288	124.962	55.228	112.587	81.5651	122.162	86.8113	124.845	75.7116	59.3518	136.562	90.0458	114.513	101.071	59.4357	24.5508	79.364	87.4597	116.55
AFF1	4595.5	4141	5136.51	5101.59	5762.93	4659.47	4807.95	4995.25	4188.94	4346.42	4965.9	3713.25	4612.66	5042.66	5688.26	5088.63	4062.29	5287.97	5656.05	5523.64	4721.84	7294.45	6164.79	5321.2	6744.41	4873.16	5678.77	4395.37	4604.92	3856.53	4521.99	5255.51	3561.83	3980.29	5140.29	3658.61	5376.89	5929.69	4370.08	3881.33	4627.44	5706.23	4078.5	4730.8	4273.43	3908.58	4585.05	4250.52	3776.48
AFF2	148.064	86.3723	212.393	219.587	153.263	86.2021	153.162	183.235	225.501	225.916	143.57	217.488	200.12	249.502	227.811	187.705	137.067	106.426	61.0964	153.938	227.026	102.03	135.785	185.249	75.9651	139.319	196.981	97.6878	180.92	152.148	167.938	157.645	61.276	105.233	106.548	11.457	87.988	151.19	135.226	187.052	141.141	154.429	184.469	93.6406	75.2668	152.397	115.665	114.154	77.3282
AFF3	1157.26	1298.63	1729.75	964.561	1385.36	790.224	1317.41	1164.06	1798.61	691.94	928.282	797.858	1056.65	1037.34	1157.85	730.525	895.843	725.829	535.825	1177.32	616.064	1428.96	1003.03	159.968	2895.83	1161.61	465	628.579	1453.7	780.827	912.278	791.281	743.257	848.78	1437.42	256.674	142.835	313.485	1443.15	909.945	370.861	17.9761	584.083	877.835	294.715	341.579	95.0911	452.931	713.801
AFF4	1553.17	1608.86	1777.07	1665.67	1638.99	1392.45	2315.42	1529.67	1763.72	1618.78	1644.31	1723.65	2131.84	1658.83	1927.81	2237.8	1949.11	1920.36	2038.27	1943.93	1640.69	1448.24	1599.43	1568.55	1894.5	1749.86	1556.66	1529.41	2065.85	1625.58	1861.05	1634.09	962.699	741.652	1220.47	906.894	1285.32	1000.06	1125.43	1093.5	1041.45	997.429	1042.42	960.479	1443.23	1014.73	1167.8	880.84	1023.83
AFG3L1P	1331.73	917.162	1369.69	1411.66	1279.3	1198.64	1171.07	1316.54	1165.8	888.815	1474.59	943.848	1569.1	1188.39	1307.48	1353.75	1249.27	1288.41	1210.59	1359.9	1106.18	946.108	839.002	910.59	1336.43	1179.71	946.15	707.189	912.593	650.367	868.212	664.042	729.931	774.68	934.772	989.443	599.516	636.362	945.446	1096.36	823.044	634.659	780.02	792.726	996.255	858.708	860.163	853.434	1028.99
AFG3L2	2953.57	2408.04	3100.89	2437.9	3149.85	2927.72	3045.36	2221.45	2489.62	2465.16	2575.3	4145.08	2665.65	2281.37	2946.16	3038.97	2405.8	2615.75	2852.94	2984.39	2471.11	1813.8	3012.62	2796.2	3783.7	2788.25	3056.89	3161.25	3806.78	2653.57	2778.24	2848.19	2472.63	2377.83	2852.5	1999.3	2531.17	2831.89	2746.94	2373.75	2289.3	2659.28	2367.32	2601.41	2619.4	2616.47	2056.09	2274.68	2456.79
AFM	95.0099	92.9144	58.2703	98.9193	62.607	89.2992	6.92082	57.929	120.462	66.3581	140.619	60.0734	102.932	84.2656	81.6308	120.858	54.8921	158.544	8.06516	92.6743	83.7991	42.1769	99.2364	15.1435	16.3522	48.3219	50.3879	10.146	133.077	25.3387	75.5037	54.3617	10.6781	50.9427	90.8457	25.6433	75.7366	51.2393	39.1856	7.17011	78.5263	49.8183	87.0536	90.2132	12.1623	59.9765	12.6501	18.0491	25.5714
AFMID	51.6095	18.986	41.2882	32.6145	21.3272	67.0319	39.735	128.67	6.60253	109.864	81.7511	27.6313	23.8325	17.0853	66.6062	33.1139	27.1913	25.4399	20.6305	6.41476	75.9344	152.687	88.5886	59.5486	7.89242	17.59	64.9595	26.0718	16.182	19.7475	17.8737	20.7802	53.4783	69.1866	17.8231	14.2416	22.9882	29.534	45.3117	159.21	8.67134	97.17	99.1041	13.4329	54.6143	53.3976	47.8953	47.3656	15.6401
AFP	87.7982	54.6456	60.7224	41.5742	54.4922	55.794	43.2355	51.6398	64.1118	61.9002	40.4765	143.755	96.3387	87.0955	46.1866	94.7336	51.2427	13.7617	103.548	72.9074	101.949	78.2695	18.7252	121.422	69.699	55.651	96.4318	92.5777	82.8988	94.9342	114.724	104.503	84.9267	83.5091	63.3397	123.554	58.7637	29.5209	152.681	202.404	215.402	106.256	121.652	61.5969	94.9196	12.3416	43.1955	59.7828	98.694
AFTPH	2228.35	2141.57	2268.12	2078.37	2249.54	2314.28	2223.05	2275.3	2347.04	2342.06	2542.07	2719.9	2439.92	2424.59	2603.17	2302.68	2505.98	2171.59	2745.61	2541.9	2205.24	2632.74	2523.03	2586.93	2545.44	2209.36	1797.47	3026.36	2669.82	2672.7	2846.37	3011.22	1437.16	1557	1655.86	1463.27	2793.1	1943.03	1743.23	2277.9	1619.25	1700.24	1781.86	1465.52	1618.47	1568.47	1496.98	1592.4	1506.58
AGA	1803.19	1165.33	1259.53	1311.51	1338.58	1680.12	1322.33	955.037	940.69	1000.66	992.321	1490.47	887.785	932.396	955.932	969.415	994.892	902.02	1360.73	1368.35	897.843	564.451	872.201	699.594	1065.19	606.623	1425.21	987.851	1670.5	1417.97	1293.2	893.652	1295.54	1161.08	1932.69	1521.11	1251.37	1107.64	1059.13	999.905	1476.55	1165.04	1387.85	1232.25	1526.76	927.34	1515.15	1056.87	1322.84
AGAP1	254.499	307.558	247.578	256.718	334.528	146.101	133.782	206.626	315.641	288.207	349.587	277.218	225.888	352.556	234.746	413.601	177.594	225.394	447.613	317.218	160.567	168.946	195.538	74.6348	77.934	83.4792	390.587	151.89	96.0818	33.3468	143.55	99.6882	61.8407	91.0401	86.0125	32.0792	60.5461	174.08	29.474	117.089	103.273	68.8621	89.1453	11.6862	51.3393	211.23	142.489	84.0408	94.9602
AGAP11	31.1632	8.33001	15.5365	66.2032	31.0901	48.9425	50.3571	8.0837	62.4229	37.9839	27.0653	46.462	75.738	61.8856	85.7655	10.6034	28.6768	13.3781	45.8401	49.3883	37.6939	10.028	5.57435	23.2385	29.4423	14.1455	7.77473	15.6685	11.7282	47.0576	6.71823	69.1192	24.2808	39.2812	46.4715	42.8381	5.07918	13.8204	59.2126	13.6029	48.3726	74.2538	37.1776	98.4394	19.1725	42.627	107.4	95.253	86.3456
AGAP2	283.408	161.132	269.416	212.571	236.814	268.277	276.654	209.372	284.637	168.972	300.557	303.562	260.985	218.812	311.017	284.35	236.624	292.13	295.856	350.191	227.155	258.582	256.212	258.037	274.377	293.15	221.191	321.068	298.95	273.61	273.981	329.923	119.471	216.218	270.704	236.63	179.482	203.936	231.435	281.866	217.441	193.169	170.886	272.675	257.81	275.912	111.422	164.423	218.033
AGAP2-AS1	15.7692	18.5165	17.9125	8.38337	27.1955	14.9772	12.255	23.8793	23.243	15.3062	16.6929	8.3023	7.5226	13.0583	15.4399	11.1297	21.3246	9.4644	9.23953	13.6787	21.5835	15.0546	9.67226	12.8563	9.17508	9.70527	8.05878	15.1239	13.8242	13.1865	16.1133	18.4908	20.5465	16.5449	21.2247	10.1185	17.3372	17.9292	12.4046	30.1733	18.6353	22.3847	8.80761	24.5477	30.726	14.6826	29.989	23.2631	17.4916
AGAP3	695.089	678.192	438.173	590.069	577.292	752.249	508.903	689.95	677.41	805.033	1035.37	682.15	687.38	527.381	867.215	743.727	736.61	521.217	1059.53	691.643	1051.02	619.808	708.021	1055.28	1092.83	579.739	684.012	431.379	704.87	829.858	889.592	791.47	1150.07	742.566	750.446	1194.29	609.267	622.263	763.021	481.698	533.782	918.634	1074.6	657.736	774.231	893.765	818.351	931.131	791.697
AGAP4	541.9	414.25	519.341	645.236	557.769	520.772	483.311	561.73	762.003	616.161	379.703	185.62	648.744	517.19	735.235	616.99	632.824	478.859	459.493	481.435	819.432	541.642	496.415	452.583	536.496	575.717	244.554	316.202	330.138	359.378	389.753	243.069	193.174	229.408	339.472	242.349	306.999	455.026	581.739	682.458	399.618	333.718	300.329	310.104	342.577	235.096	445.439	326.124	451.795
AGAP9	147.911	197.998	136.244	147.901	232.811	129.231	179.853	133.864	131.963	152.501	195.65	54.0153	145.472	95.1337	115.017	94.233	290.802	146.626	192.649	126.615	250.25	178.999	165.896	87.3843	166.289	202.366	144.259	126.952	106.485	15.6346	108.587	70.1248	58.6459	27.5518	155.275	227.557	125.77	110.926	110.686	102.47	127.991	71.4892	92.0879	11.8523	118.962	34.866	160.11	133.466	109.791
AGBL1	73.0069	76.1379	56.0428	34.8125	31.8186	19.0012	49.2246	8.9078	44.376	54.1184	48.8729	32.4019	20.0638	57.7455	54.663	9.63464	11.0737	121.12	70.8447	18.2444	64.6236	111.248	80.3415	11.2431	14.0072	11.7374	78.6525	24.4895	61.1195	56.253	12.5323	10.2558	14.0735	5.62186	4.58013	28.0402	12.8006	61.6082	58.0946	5.77566	68.7412	7.57719	17.5969	16.6486	8.01292	14.7583	15.559	72.5612	41.8044
AGBL2	120.831	147.599	194.326	161.454	145.883	119.69	184.004	95.49	146.834	95.0759	111.044	94.2086	199.138	172.678	184.861	183.58	150.778	151.574	117.829	149.785	116.479	164.134	94.9126	92.0888	121.285	174.397	154.58	128.152	90.8584	93.0143	98.6623	61.708	38.2908	82.5225	135.813	96.988	54.8305	112.052	86.4064	132.598	64.2117	79.1975	70.0954	111.895	120.588	107.776	135.278	123.507	167.732
AGBL3	131.198	120.023	311.193	198.847	152.618	114.624	150.986	36.3129	167.583	117.45	113.154	147.863	305.639	137.81	88.957	136.449	159.819	134.27	134.147	83.6414	93.9242	109.917	77.1541	59.6814	157.788	117.598	107.159	143.548	191.297	139.214	126.339	83.185	41.4512	31.3222	92.1974	62.6321	58.1816	31.3357	78.6659	68.9421	60.3757	30.6418	39.9282	58.318	101.422	54.1267	10.6409	52.4039	64.1011
AGBL4	60.5458	29.6987	8.70629	11.5742	6.41751	7.54999	16.0717	45.2402	6.16377	24.4762	35.9354	103.107	24.3494	60.8053	52.6297	47.4531	51.4394	72.6241	24.7259	45.5206	4.68906	23.4991	27.8801	3.57293	9.51225	51.1547	40.8936	49.544	46.1137	6.42815	23.6596	6.51419	21.0867	84.632	7.55455	9.77759	10.885	16.2703	7.28517	58.4796	42.2219	14.3204	3.19894	51.7622	73.1016	3.38974	43.924	25.9264	85.9266
AGBL5	157.013	104.285	238.352	179.8	164.615	234.659	156.694	113.696	247.595	232.03	135.342	191.013	105.64	155.392	191.44	142.345	146.979	139.531	162.946	179.924	130.472	68.129	96.6575	118.023	100.232	171.882	147.685	213.281	96.0276	151.955	170.883	155.975	91.9386	149.364	153.999	132.984	170.642	162.17	67.9046	93.4122	82.5176	165.727	109.293	96.8914	25.2968	175.06	147.236	115.797	114.675
AGER	220.501	283.276	351.757	379.882	275.707	269.068	347.188	308.231	335.371	306.565	177.536	208.76	245.382	370.488	339.56	320.064	253.686	298.622	363.302	352.951	324.03	429.329	270.349	355.82	410.181	498.942	397.618	147.51	241.929	318.59	279.359	205.317	250.339	415.276	274.883	315.872	135.987	202.697	393.554	316.775	233.151	265.205	436.991	381.511	264.11	363.174	329.556	295.402	198.543
AGFG1	1275.89	1347.5	1298.92	1291.28	1210.58	1356.83	1269	1219.17	1348.67	1637.89	1343.95	1298.99	992.338	1208.25	1344.88	1250.89	1210.78	1294.46	1188.33	1295.65	1347.66	1044.65	3109.92	2208.74	1843.46	2334.56	1130.84	1426.93	1406.82	1360.88	1416.77	1576	1890.86	944.855	1284.14	1531	2268.33	1851.78	1323.81	1030.85	1461.42	2931.63	1995.19	1229.43	1407.51	2260.47	1782.6	2166.82	1424.71
AGFG2	657.788	587.3	673.044	712.149	593.515	597.367	854.581	518.775	763.989	457.211	837.143	594.184	774.016	738.396	744.179	874.629	584.065	477.587	744.317	884.317	617.758	576.59	277.036	323.003	450.392	421.393	485.718	691.32	866.583	780.275	701.079	498.103	288.774	340.359	313.323	262.159	399.444	496.944	342.546	277.608	440.278	202.66	361.926	425.287	624.992	365.787	219.617	272.881	353.862
AGGF1	911.928	1127.85	855.302	967.386	1039.06	1070.13	1152.37	931.105	983.091	929.711	952.69	884.793	960.813	1243.14	1108.04	1096.48	856.344	725.775	875.878	1045.3	958.398	800.274	683.279	1082.01	790.716	1012	576.428	1107.91	1082.95	1166.34	1058.67	916.669	886.23	369.962	1072.75	952.114	1306.68	641.139	765.306	811.128	904.951	890.336	709.116	832.335	920.743	869.204	744.288	736.791	903.604
AGK	1039.06	981.161	970.455	878.002	1129.39	1069.78	898.783	751.721	833.637	730.516	771.435	850.107	1088.58	896.032	931.827	913.36	771.685	830.16	813.235	1203.29	775.422	715.083	605.111	783.355	707.709	761.726	766.745	931.043	799.976	640.9	862.977	1206.02	690.51	858.107	776.469	612.511	798.352	884.785	654.953	889.913	1007.43	462.712	641.727	873.134	852.966	813.522	1060.9	945.75	852.908
AGL	1503.12	1403.14	1728.11	1656.47	1570.58	1336.35	1701.45	1548.54	1584.28	1121.34	1466.15	1580.71	1735.66	1465.14	1766.17	1668.35	1436.56	1496.45	1704.99	1804.23	1202.36	1457.46	1292.32	1181.35	1914.58	1421.16	1258.56	1540.92	1903.09	1536.81	1666.57	1314.43	531.838	564.241	840.742	611.553	973.031	961.286	653.498	703.332	678.898	1297.44	734.502	801.188	771.931	689.341	698.666	569.967	978.518
AGMAT	572.951	614.507	961.477	803.341	907.941	677.396	1085.4	399.156	825.682	267.809	357.027	892.634	586.832	437.597	670.82	530.216	629.089	520.281	440.016	617.67	340.551	598.75	302.008	288.455	597.554	736.584	617.052	714.588	788.309	695.527	569.686	412.969	388.216	662.546	956.73	724.815	758.986	747.762	806.465	1105.33	741.521	201.041	438.512	860.499	616.824	404.551	401.578	569.216	1490.32
AGO1	1111.5	928.88	878.008	897.218	1007.53	1045.2	890.07	938.954	896.735	1090.64	1074.34	1112.39	1001	1014.8	1080.2	943.947	971.655	1066.44	1202.98	968.384	1019.73	771.377	1237.21	1075.91	1002.52	989.348	1182.04	755.234	1046.61	868.423	1139.98	1093.78	1312.28	1079.57	1167.27	1119.69	1000.47	840.707	1149.47	1037	963.713	870.316	1305.58	823.269	1136.78	1280.37	986.097	1072.56	1066.07
AGO2	1766.72	1754.92	2191.42	2386.95	2209.59	1625.15	2075.45	2453.49	2335.14	1684.27	2461.57	1646.94	2392.51	1753.44	1867.97	2275.34	2041.3	2095.4	1833.88	2184.62	2009.54	2379.67	1464.45	1346.47	1886.8	1591.8	2098.84	1222.26	1604.78	1608.77	1521.19	1276.8	1602.98	1847.89	1786.08	1576.33	2069.91	1701.07	1500.42	1568.83	1420.55	1645.47	1452.38	1620.12	1884.07	1550.36	1754.12	1824.15	1892.23
AGO2 /// CASC7 /// CASC7	39.1379	90.5764	48.6773	45.1964	15.4607	37.3753	46.1333	89.1365	9.17473	81.7341	6.83877	3.89011	50.173	7.14427	10.7035	38.5016	7.97351	13.2121	80.1171	15.18	8.55354	8.88123	49.2303	4.93424	49.8719	39.7846	7.81741	4.60132	10.39	21.9128	7.49544	60.7951	5.84794	6.09021	5.59266	2.81922	54.941	12.1336	8.37307	8.68068	33.6577	7.16522	37.5783	10.3351	49.3759	5.65631	16.0738	56.649	8.39288
AGO3	475.626	388.407	495.006	508.512	525.517	469.363	584.096	628.202	634.232	596.885	403.264	435.558	455.403	557.241	504.783	456.227	522.742	541.203	406.021	407.333	486.854	578.05	558.517	435.196	482.05	425.682	460.463	393.557	401.347	331.321	259.535	395.13	436.993	517.172	529.491	425.707	423.881	485.81	544.291	483.193	468.79	425.978	584.852	461.87	510.072	458.479	448.796	444.95	491.077
AGO4	3433.61	3597.14	2698.86	2883.63	2969.09	3232.05	2653.3	3605.09	3213	4130.05	3457.17	2771.84	2441.09	2663.33	2711.66	3155.38	3126.86	3001	3556.34	2089.64	4556.61	5023.62	4876.74	5199.51	4727.1	4432.34	3771.17	2310.27	3377.99	3667.07	3972.44	4913.73	3202.48	1732.03	2335.68	2387.52	4297.8	4288.49	2527.04	1378.22	1440.2	4642.15	4159.14	1657.75	2226.6	2823.92	2364	3307.11	1710.84
AGPAT1	1341.12	2441.32	2193.8	1822.88	1548.22	1624.58	1857.41	2078.55	2740.65	3124.22	1811	1408.47	1474.89	1668.67	1846.98	1682.51	1803.57	1498.54	2147.58	2067.94	1978.55	2630.72	3220.77	2201.97	1875.45	2347.36	1404.91	1484.03	1510.65	2131.74	1631.71	1656.59	1884.05	3372.62	1410.59	1816.45	2681.59	2577.98	2119.78	1779.08	1811.97	2379.32	2125.21	2090.67	2133.24	1853.21	2621.52	1829.78	1866.92
AGPAT2	807.777	870.085	826.614	838.282	954.391	966.199	710.743	878.91	862.583	1349.47	1265.79	1143.36	901.835	961.937	983.612	983.509	1068.06	1179.35	978.965	797.568	977.414	724.284	1470.11	902.204	1167.5	1201.88	1272.35	746.162	787.879	976.756	1079.63	1017.22	1550.07	1535.05	1146.83	1572.41	939.688	1105.12	1188.43	1208.8	1113.03	2249.75	1351.1	1161.57	1310.57	1888.76	1425.4	1582.22	1185.25
AGPAT3	1316.9	1490.8	1020.87	1353.2	1034.07	1691.62	1412.06	1798.23	1529.5	2225.17	1604.04	1138	1395.74	1364.9	1714.24	919.226	1867.16	1470.55	1522.01	1310.5	1670.54	908.273	1697.73	2027.3	1576.77	1208.06	1065.68	1360.86	1361.77	1523.18	1391.28	1683.4	2515.94	3337.44	2063.14	3302.52	2503.33	1721.9	1972.11	1643.39	2704.19	2004.83	2235.6	1755.82	2305.11	2836.63	1672.35	3098.2	2768.02
AGPAT4	347.603	133.149	226.165	254.029	208.069	188.157	19.0307	153.748	173.954	230.866	139.584	248.904	165.187	308.399	250.089	118.026	149.108	164.42	397.059	196.024	238.435	142.576	154.675	155.076	162.277	149.051	103.768	81.3774	107.737	178.08	153.749	259.742	190.415	45.1513	132.747	205.83	25.1206	108.951	136.826	182.019	246.476	191.077	168.085	71.2763	187.518	192.454	144.564	218.019	141.669
AGPAT4-IT1	527.776	249.147	320.472	536.249	329.101	331.146	207.477	308.634	418.438	520.57	331.995	221.397	533.748	351.354	282.5	362.296	366.394	194.14	533.144	419.547	636.86	172.899	457.781	277.158	406.161	370.122	232.562	122.591	235.46	213.098	225.043	186.951	269.369	300.027	197.184	251.425	207.72	277.02	225.181	445.04	320.384	357.607	272.23	233.75	311.016	315.185	431.087	419.468	168.323
AGPAT5	1429.92	1392.95	1475.29	1448.84	1704.74	1648.81	1714.91	1547.12	1580.16	1045.37	1523.55	1443.3	1554.06	1459.66	1583.66	1332.27	1127.2	957.427	1069.92	1752.32	1127.88	1333.25	1275.4	988.679	1973.42	1685.66	1064.89	1359.25	1811.73	1205.1	1487.85	1405.21	1131.21	1086.66	1824.57	1105.72	845.659	948.431	1326.52	1307.08	1389.74	825.659	863.099	1093.42	998.414	1106.21	971.319	879.555	1170
AGPAT6	1378.03	1011.18	1283.42	1560.34	1255.38	1095.09	1023.21	1247.12	1172.34	1531.11	1473.73	1265.97	1274.44	1489.64	1683.19	1639.81	1170.27	1848.51	2359.46	1308.2	1758.97	1041.84	1592.41	1267.59	1971.21	1422.42	2003.91	1198.22	1199.01	1269.97	1243.98	1049.87	1079.84	1504.23	939.064	908.18	825.346	861.679	1103.98	1139.97	926.213	1009.26	1222.87	1186.86	1245.02	1258.76	1342.64	1246.41	924.201
AGPAT9	1183.51	761.569	728.974	948.07	759.007	1422.07	659.718	1488.15	971.38	1283.94	1001.58	1380.6	1095.33	977.31	770.65	733.475	1296.22	1266.11	1051.83	647.482	1493.19	1672.12	862.828	1568.99	1011.25	670.724	955.466	936.358	1120.7	1706.75	1437.85	1058.47	1542.63	1498.31	2020.58	1886.67	1716.87	793.452	1956.72	586.488	891.391	1616.68	1860.14	1201.65	1297.26	1862.69	889.852	1678.49	857.144
AGPS	721.35	1004.2	993.359	877.87	1042.61	1125.35	763.409	804.213	1000.26	1004.29	1221.01	1319.35	1196.79	1119.87	1269.09	1300.49	1052.52	1162.04	1147.31	1112.37	1096.89	631.356	973.501	1368.34	1141.58	936.967	1026.14	1257.15	1364.14	1385.91	1488.92	1672.75	412.968	267.556	389.858	380.761	1059.08	825.047	459.856	347.873	524.582	862.871	471.473	460.92	526.434	519.575	384.561	366.76	338.463
AGR2	80.7678	99.8659	37.5342	90.345	85.401	78.3565	85.0166	105.721	98.5553	82.5858	58.1261	84.2904	24.4776	102.4	97.3051	48.538	84.8063	108.93	9.31471	108.669	40.6044	57.2253	12.7688	59.9544	58.0092	74.1595	48.819	70.6718	25.5612	51.306	47.1687	25.9261	87.3254	42.9819	81.2882	81.0723	142.475	146.989	109.105	59.9595	4.63881	22.3529	87.7685	13.0876	73.0953	11.0449	55.8849	17.8383	37.3135
AGR3	8.14703	23.9277	11.7116	4.40197	24.3991	8.23541	2.28597	21.7355	26.0552	5.24262	6.55438	8.69951	1.84071	7.98344	5.35996	2.75908	25.4529	52.5078	13.2336	37.1889	47.5391	22.5954	38.0771	26.2681	31.2425	7.29374	1.47009	20.2293	2.88698	19.0095	30.2278	12.0409	6.08095	7.23968	15.2004	4.03308	57.0921	20.2765	10.2064	8.9276	12.2769	29.2461	51.8256	14.1381	8.16427	8.80512	3.44926	35.9291	58.9257
AGRN	280.511	307.689	343.054	278.453	314.358	282.948	258.071	157.736	263.344	461.286	288.557	252.97	391.025	492.954	346.462	395.78	293.945	368.044	245.602	405.306	273.304	447.212	409.17	482.254	251.591	343.662	329.104	374.045	151.462	405.991	396.184	548.217	368.74	479.314	269.281	335.535	440.157	389.139	484.475	455.519	315.89	426.365	363.159	346.479	490.901	202.922	377.353	373.656	334.789
AGRP	16.2829	20.2241	78.7748	26.35	64.2228	70.8394	48.0604	19.6545	28.4889	18.9624	25.5673	30.1333	153.267	17.2458	19.3751	28.9305	71.6729	36.429	62.2827	10.8936	27.7358	112.2	169.791	50.397	42.6536	21.993	14.7154	18.0578	20.7337	19.3731	28.7118	36.4153	20.4173	26.592	66.5765	100.159	32.6987	16.4864	30.6145	30.2497	215.928	28.0142	22.025	30.9286	37.19	88.13	31.8395	12.3035	34.4932
AGT	98.4299	191.004	109.877	109.312	109.742	157.702	105.81	105.389	111.318	96.5095	217.558	126.533	259.894	156.4	225.032	146.519	145.406	185.549	223.274	152.944	239.146	110.264	164.392	121.564	150.793	128.503	132.702	119.149	121.447	125.055	118.186	133.596	59.0568	87.1576	17.0963	61.4691	26.9534	201.973	113.721	118.96	50.5257	90.4542	97.8602	135.173	143.937	80.6719	120.482	150.131	111.284
AGTPBP1	3091.43	3512.97	2467.84	2651.13	2682.71	3291.16	2313.24	2998.31	2776.68	1999.29	3340.6	3551.7	2672.41	3084.17	2941.4	3205.04	2400.37	3320.63	2955.92	2212.37	2992.8	2920.91	3847.99	3442.76	2415.52	3714.39	3896.29	1820.8	2883.16	2947.84	2948.45	3489.07	2324.37	1480.41	2060.59	1999.79	3596.6	3139.05	1906.45	1075.12	1687.47	3405.37	2555.43	1439.92	1880.07	3050.33	1634.17	2580.01	1704.24
AGTR1	74.0042	167.528	71.9506	92.1199	94.4807	39.887	72.9467	77.0497	97.9415	122.844	88.4765	127.995	118.74	119.463	94.1451	194.058	117.974	217.982	139.563	126.747	108.829	97.7383	98.3976	58.7521	72.4175	113.9	109.47	148.54	73.2788	86.9156	88.8258	140.162	81.5331	75.798	52.8951	14.9434	51.7387	116.826	59.159	78.1656	61.3905	71.8163	41.6322	38.7445	77.1546	89.9789	71.0881	83.6342	65.5213
AGTR2	15.034	111.279	88.3953	40.1959	84.1129	93.3153	38.8686	62.3972	107.856	81.4227	127.757	55.9273	137.149	105.335	136.958	125.878	23.4351	74.2598	76.3417	68.9894	204.397	124.91	66.5625	101.242	31.0956	138.005	99.5267	74.6555	87.6807	71.0548	72.6062	134.048	77.5861	97.6138	122.335	7.8739	74.3933	86.667	78.7767	63.7019	78.5634	21.6945	85.9259	114.929	26.7724	21.8263	21.4036	89.9273	11.9695
AGTRAP	3188.06	3263.36	2366.49	3135.09	2983.7	4344.93	2349.27	2933.08	2938.16	3879.77	4146.52	4558.64	2419.82	3469.56	3192.36	2730.04	3103.86	3593.82	3322.21	2240.92	3589.25	2730.88	4489.41	4419.3	3052.82	4258.64	4316.02	3516.22	3496.98	5379.32	4300.09	5423.97	7839.14	5112.06	4325.22	5473.94	4905.93	5079.23	4171.41	2551.21	3653.36	8018.31	6810.56	3662.95	3695.24	7405.83	4110.89	7057.24	3426.22
AGXT	44.3434	49.4091	6.08012	4.70032	25.2498	6.87311	4.68602	3.86275	38.1775	56.5478	4.56641	8.26371	65.7197	7.4013	86.5541	65.3339	45.8559	19.8193	29.211	8.49439	33.0106	6.92386	44.9657	30.4341	78.3647	33.8566	28.0713	12.959	35.2623	49.6645	13.99	4.39341	31.6954	32.8757	5.47797	28.481	11.3144	11.2886	9.25055	10.9798	63.1002	8.88406	7.70925	47.3346	4.40761	38.6146	17.5285	85.6948	106.728
AGXT2	30.4284	47.1769	26.7249	62.3441	14.0716	37.2539	17.4161	31.3339	26.3925	27.2077	30.329	29.1297	36.5929	68.5411	68.5124	19.2967	88.5191	121.987	25.9575	72.7901	46.7895	19.0492	21.911	12.3269	11.8159	97.3672	50.5641	63.7993	32.6945	53.7614	26.3734	22.9767	64.6829	79.0067	14.3242	14.6842	37.5432	24.9201	18.758	21.8458	11.6114	28.5057	18.0016	128.03	23.8582	18.8462	80.2775	6.63322	20.6406
AHCTF1	810.395	678.455	756.579	957.629	967.872	898.11	918.114	971.563	1034.17	762.989	868.199	888.085	1275.6	1092.81	1098.03	1355.21	923.671	714.972	823.846	1122.47	907.756	1928.52	721.237	1146.82	764.484	745.329	838.671	1172.21	1108.31	855.092	1215.83	1113.86	740.352	639.833	740.369	695.914	1082.3	831.511	969.389	844.461	469.376	680.076	686.803	441.797	747.629	522.737	740.042	685.28	898.354
AHCY	708.919	831.781	822.769	843.851	951.948	965.322	769.934	858.586	1011.41	912.726	1093.74	1175.29	717.942	783.272	868.382	963.797	703.269	1100.81	810.983	734.283	957.005	516.808	1018.31	820.842	859.116	960.859	834.588	1189.74	1091.08	1055.36	923.55	875.301	1325.31	1037.05	972.057	1028.77	958.539	1237.77	851.863	1031.51	1313.82	1406.34	1095.74	947.369	1030.61	1274.72	1296.49	1221.18	974.224
AHCYL1	4277.41	4251.21	3742.07	3792.16	4074.47	4142.5	3900.7	4219.81	3838.1	4462.25	4915.34	5043.69	4523.73	4565.85	4060.79	4573.04	4292.12	4324.66	4509.42	3881.7	4375.3	2979.45	4503.25	3843.74	4511.9	4121.67	4430.89	3251.19	4091.56	4339.7	4222.56	3635.43	5043.17	3760.19	4085.53	4326.82	3433.93	2872.42	3519.71	3291.48	3297.34	4722.55	4223.93	2990.73	3862.14	5017.22	3618.22	3989.58	4223.5
AHCYL2	701.228	759.959	770.6	928.12	812.481	707.916	752.951	738.885	801.407	819.64	928.341	989.36	1116.81	801.368	1082.15	938.876	972.225	1016.02	980.426	1013	992.717	699.69	963.504	813.601	811.199	829.102	836.841	744.989	1100.36	1091.87	1272.19	775.444	590.539	506.702	599.246	475.665	683.362	562.224	619.066	461.495	457.724	701.091	618.138	542.361	630.164	720.659	623.166	484.954	586.247
AHDC1	318.042	316.744	360.068	401.67	421.765	294.692	406.595	249.656	368.722	221.822	234.529	302.602	289.447	323.666	276.274	311.476	295.086	147.611	306.67	299.17	153.393	274.439	282.625	237.417	285.892	231.437	173.129	324.129	310.758	344.294	275.833	254.161	194.899	255.739	361.417	227.668	99.5847	24.5648	288.299	272.665	123.463	109.098	198.849	209.236	200.383	191.661	233.564	200.407	269.413
AHI1	162.454	37.8184	206.3	197.148	149.209	165.334	54.1354	135.304	197.6	173.762	114.309	119.253	213.7	99.99	131.269	211.427	218.525	296.161	181.217	248.979	145.806	149.956	149.483	109.206	254.677	245.015	165.929	133.502	126.916	80.5741	49.2147	4.45557	15.92	125.094	113.93	96.1481	98.1636	132.515	82.3568	188.485	165.243	78.6606	61.8991	87.0172	186.555	50.6393	138.477	85.8183	119.135
AHNAK	16222.9	14162.2	14061.8	14039	12904	14034.5	12743.5	14944.7	11887.8	18198.8	19257.2	13491.5	16778.7	17760	15307.5	14140.8	16032.2	19107.6	22378.7	14930	15310.9	10314.9	16301.8	14498.3	18282.8	12336.4	17142.7	8218.6	11788.2	12010.9	11427	10266.1	13398.5	10411.5	10193.1	14667.1	13300.1	10931.2	10543.8	14384.6	14062.8	17231.6	16760.7	9405.8	15706.1	16755.9	16803.4	15971.1	13180.3
AHNAK2	70.21	57.257	14.4218	13.5309	13.9573	49.6956	77.2755	11.3708	15.7063	14.8844	102.055	126.833	21.4493	82.891	24.4353	9.243	137.566	56.3237	17.4314	35.3112	52.7575	14.903	20.0424	42.1238	14.8633	84.3121	55.6358	20.0268	143.962	50.7347	53.962	20.4375	21.9231	30.0867	17.0188	18.3324	19.8394	200.711	14.1715	9.32906	38.5418	26.5505	13.1026	27.4487	80.6646	50.4041	108.627	98.754	65.1066
AHR	1733.66	1565.4	993.104	1677.99	895.165	1344.28	874.364	1199.39	1575.78	2201.58	1542.26	1397.28	1595.97	1308.42	1486.5	1259.14	1543.67	1560.65	1737.13	1309.64	2056.24	782.618	3142.99	2904.79	2564.51	2318.74	2078.15	912.109	1569.02	2077.42	2147.99	2004.28	2228.69	980.586	1045.89	1183.7	1467.13	2363.86	1573.24	1058.64	1482.96	4281.08	2566.37	978.812	1492.59	2113.32	2047.41	1213.61	983.762
AHRR	131.69	115.831	140.678	90.1199	95.0448	80.3266	65.2551	84.4478	75.5244	93.2997	123.009	108.548	71.5358	74.7455	67.3021	72.4147	94.3974	66.1597	71.0225	122.697	161.047	144.848	181.144	116.88	139.588	141.64	79.81	106.832	73.5464	98.2113	87.2884	127.07	182.887	136.124	108.345	357.773	133.989	82.8664	126.211	156.437	97.8164	105.77	141.871	69.7599	182.532	110.227	200.036	58.285	129.788
AHSA1	2358.36	2098.24	2728.74	2276.51	2472.99	2528.28	2945.05	2801.95	2177.21	2298.5	2191.02	2990.14	2302.27	2737.38	2598.28	2073.38	2250.9	2039.3	2481.53	2886.89	1995.07	1915.49	2410.87	2899.15	2830.52	2071.55	1797.99	2986.26	3133.47	2822.03	2581.09	2599.72	2783.46	3190.86	2898.43	3431.38	2348.25	1992.86	2431.29	3504.26	3487.28	2278.46	2210.57	3580.04	3175.77	3065.78	2532.7	2366.14	3186.69
AHSA2	1816.11	1495.6	3806.67	2787.2	2204.63	1818.69	2326.17	2628.86	2076.92	2244.12	2806.19	1198.08	2173.64	2300.01	2299.99	2762.92	2655.22	3222.8	1817.74	2495.4	2130.62	1932.01	1478.51	1636.66	2137.64	2290.18	1664.5	1202.58	2426.49	1590.2	2382.8	1173.5	1585.87	1578.53	1263.1	991.341	948.761	1189.1	1786.03	1662.13	1052.99	934.246	1151.59	1188.05	1632.86	1236.77	1487.38	1700.62	1975.49
AHSG	35.6779	8.30466	5.43798	41.994	8.78793	5.33105	10.6875	58.6135	17.6429	30.7346	13.9304	16.1812	15.6783	13.8258	8.32956	11.8964	18.7771	25.8386	80.3591	40.8792	34.3951	7.3682	44.8738	16.457	17.7676	12.9224	32.4644	19.1798	5.62098	51.1672	36.1896	17.594	33.5222	9.39859	7.36288	13.1576	55.652	73.6178	119.023	12.3857	23.3566	8.45942	81.5031	10.407	18.0077	8.37483	19.0162	13.8483	11.5942
AHSP	548.575	700.728	180.051	175.451	168.894	347.154	104.784	427.59	256.972	109.539	211.512	317.223	110.968	300.936	198.763	156.709	1357.04	131.927	421.624	198.398	262.777	126.41	531.587	1947.73	352.961	978.488	132.531	154.851	168.865	530.511	160.931	465.601	362.608	328.246	684.557	524.492	7300.54	669.086	194.072	210.381	886.056	1641.94	354.046	1215.19	292.976	733.203	290.7	10359.2	4639.5
AICDA	66.9978	9.8724	4.45993	23.2283	30.7381	40.1609	9.15982	56.9079	1.89142	3.11601	51.9286	30.1533	24.5983	46.6678	22.8813	127.572	43.6971	70.3293	70.4859	47.58	59.631	56.7374	57.5619	61.2139	70.979	40.566	101.536	109.595	10.826	31.0098	58.4224	81.6574	31.7625	2.80712	23.083	37.0985	49.2963	56.924	30.5025	124.171	42.2571	9.86945	13.6695	132.287	12.4121	4.64203	24.9928	18.6651	30.2219
AIDA	5167.34	4941.92	5470.66	4569.04	5503.28	4664.57	5148.9	4707.71	4426.49	4120.53	4751.85	7007.48	4752.56	4786.79	4865.18	4769.55	4609.53	4776.96	4906.17	5116.97	3493.88	4199.04	4506.26	3532.85	5775.85	4403.85	4621.58	5734.7	5712.46	5135.09	4925.94	4766.32	5325.81	6342.3	7065.59	5635.26	5491.6	3740.96	5857.85	5725.87	4978.41	3777.95	4285.53	7513.5	5409.67	5104.5	3935.38	5320.34	5924.14
AIF1	11832.1	11944.4	7450.81	8093.75	8769.73	12946.7	6966.57	13172.7	9380.7	15018.2	13327.7	9950.95	6018.7	8669.78	8545.4	6776.31	10670.5	11364.5	12031.1	5706.44	12440.9	5518.89	18757.8	13792.1	17203.1	11854.2	7625.34	9165.95	11823.8	14317.3	12082.9	12771.4	23694.2	20101.3	11796.7	17392.6	13909.2	11625.2	10847.4	8848.79	12239.2	17293.6	20811.2	7515.82	9106.71	17368.2	9189.97	18827.5	12137.4
AIF1L	132.962	104.798	83.698	165.656	116.168	111.891	132.364	112.656	107.273	174.072	270.95	207.122	185.062	162.158	216.253	180.32	175.069	181.395	128.362	157.122	169.723	177.203	172.027	159.151	115.08	119.507	182.81	144.427	92.4733	133.05	131.52	144.624	110.547	105.012	85.1829	41.6266	88.7073	103.212	122.458	86.47	109.593	125.232	102.95	64.3245	146.164	58.7458	106.723	64.0461	86.5081
AIFM1	614.173	742.437	790.644	598.588	692.861	614.347	656.071	679.24	530.056	567.802	549.631	732.541	1023.18	625.572	524.527	539.901	529.094	440.308	620.607	626.766	767.614	605.36	553.931	734.213	503.034	864.1	900.092	868.047	538.885	640.65	542.737	631.794	843.01	799.931	798.861	677.426	671.46	740.297	793.192	1010.15	840.688	684.1	650.548	834.963	942.865	751.441	1174.48	1099.41	885.127
AIFM2	165.783	161.66	256.682	193.801	154.325	241.165	167.188	160.909	120.906	126.088	244.942	42.4547	156.734	183.081	237.671	270.637	130.289	171.293	112.987	141.101	134.222	167.114	147.414	174.804	161.307	204.126	167.91	219.748	201.406	151.294	141.496	117.018	110.482	168.561	91.0982	73.5006	95.6317	170.54	170.475	228.064	169.86	80.1212	158.155	246.338	205.022	131.698	158.316	79.9254	176.976
AIFM3	189.285	247.083	123.798	156.83	178.944	227.435	146.574	267.632	142.215	293.965	255.808	202.934	215.476	229.679	185.177	177.403	207.028	247.529	232.026	230.004	254.372	107.501	257.367	187.809	239.63	175.715	207.273	187.117	208.78	353.403	226.467	225.322	180.683	207.233	195.248	219.302	157.473	150.214	247.285	136.675	141.744	223.205	248.72	88.7058	123.649	216.087	220.677	247.545	139.774
AIG1	282.788	406.58	337.444	400.392	291.09	357.572	338.082	251.574	290.073	462.792	298.7	313.968	320.186	255.855	272.533	372.986	314.799	491.569	360.641	462.694	264.577	303.164	247.514	224.981	229.965	197.679	328.376	309.613	411.242	396.386	439.932	318.613	178.757	241.002	195.937	254.449	286.019	314.477	267.366	282.115	337.305	343.176	234.646	387.514	310.937	225.154	243.1	95.3783	202.644
AIM1	3828.98	3945.36	3553.18	3580.54	3604.39	3779.64	4684.4	3485.68	3354.56	3302.74	3847.85	2912.11	3652.98	3742.73	3736.81	4304.07	3228.53	4308.32	3989.21	3467.79	3500.25	3970.25	4446.3	4294.05	4769.43	3982.58	3165.33	3504.88	3563.23	3645.88	3832.36	3427.74	4898.59	4004.58	5933.63	4906.68	5535.38	3068.29	4108.3	4433.06	4566.59	4373.84	4769.71	6307.92	5384.06	5604.3	3412.84	4876.25	5051.94
AIM1L	90.6093	295.929	88.7912	140.167	256.458	169.99	55.5606	188.934	103.79	184.552	269.156	163.41	293.006	211.105	286.406	298.843	236.367	290.118	211.672	224.844	115.237	219.825	189.015	179.964	126.354	163.462	231.744	415.076	241.741	296.841	244.568	160.426	127.187	209.242	190.077	201.143	171.005	217.616	153.721	283.896	213.709	167.493	116.923	237.036	149.612	191.75	284.332	429.195	242.16
AIM2	722.127	673.778	580.422	502.617	737.4	1149.27	744.259	799.821	708.997	545.013	645.392	329.209	1098.74	782.679	722.21	474.058	678.782	494.535	428.453	614.903	654.8	1585.65	388.678	472.196	519.752	633.843	389.835	1101.79	754.539	603.398	775.989	913.817	789.418	743.099	890.589	1082.45	737.123	556.709	1161.2	1657.14	1521.67	237.317	900.283	1821.04	1010.64	577.097	649.955	695.908	873.319
AIMP1	3010.24	2694.23	2952.49	3091.03	3115.07	3299.94	3197.55	2804.55	2635.76	2679.45	2788.52	3296.71	2963.35	2685.32	2454.94	2733.34	2435.88	3330.05	2399.92	2793.14	2520.65	2311.86	2255.39	3094.45	2912.28	2899.83	3264.88	2784.41	2874.46	3251.05	3188.16	2883.49	3403.08	3883.18	3649.66	3516.03	3792.66	2880.73	3323.01	3935.55	3582.73	3399.45	3310.86	3761.02	3469.22	3600.33	2970.75	3555.11	3290.39
AIMP2	1489.36	1563.96	1180.05	1240.28	1425.55	1413.33	1499.68	1225.28	1304.13	1282.13	1205.16	1558.2	918.406	1442.8	1056.03	1020.22	1116.52	1255.74	1218.24	1004.83	1305.35	939.42	1671.11	1405.94	1648.02	1494.23	975.436	1653.73	1377.81	1334.74	1353.92	1634.74	2261.29	2032.91	1955.32	2079.82	1807.86	1720.21	1887.29	2315.56	2300.26	1900.32	1756.63	2149.84	2021.91	2246.76	1896	2268.97	2101.02
AIP	2550.88	2832.34	3113.21	2618.06	2790.31	2858.24	3384.84	2332.46	2922.16	2599.8	2277.11	2461.76	2369.08	2522.46	2053.38	2353.94	2694	2155.19	2335.77	2472.61	2614.74	2674.4	2507.94	2523.14	2093.07	2558.69	2252.56	2857.98	2782.12	3050.73	2686.78	2292.26	3165.24	3565.16	3935.95	3882.21	2404.57	2681.9	3583.64	3588.96	3734.08	3218.27	3095.67	4141.15	3792.07	3308.24	2910.95	2950.03	4393.32
AIPL1	95.3206	67.3387	22.712	70.7839	68.3244	78.8284	64.2056	38.1733	57.2722	121.734	80.7998	93.5721	104.52	163.051	74.9568	100.61	133.74	211.024	108.864	69.7206	64.6358	91.0826	123.928	88.8268	116.9	136.197	112.76	116.597	93.2953	52.6452	74.861	52.2615	54.9609	113.411	87.0583	30.6727	50.9636	116.937	161.152	35.4146	60.0933	20.4481	74.9129	108.924	119.292	120.038	90.9378	23.6276	25.4171
AIRE	75.6267	33.8385	36.0896	46.511	70.4297	67.328	154.123	64.1174	59.5985	70.3972	121.68	95.7241	35.5157	44.9164	67.88	31.0388	115.024	193.35	109.44	48.8266	88.7983	101.073	57.9118	100.286	87.0659	39.3381	32.0514	134.24	133.257	138.702	139.184	52.3056	101.011	58.4385	201.49	156.857	99.1953	102.463	207.925	96.4322	17.3046	22.3847	128.482	121.152	116.1	44.9054	48.5794	96.8975	142.229
AJ606316 /// LOC644135	64.7319	122.961	113.717	33.47	41.7117	66.4139	113.803	73.7341	90.9276	9.89925	45.0177	137.962	112.296	43.3367	44.7677	40.8858	111.112	20.7392	64.9901	112.653	71.398	96.6103	24.9873	15.0709	55.6805	15.6386	81.7281	55.1045	128.371	87.0148	100.53	45.8625	67.0195	39.5823	77.3799	49.577	108.475	10.151	60.9269	90.0625	44.8433	6.54468	25.0681	157.334	90.556	9.80701	20.0712	5.73058	120.716
AJAP1	65.904	35.3237	52.8016	82.2534	49.167	81.5563	81.7287	45.017	57.4428	102.516	44.0668	20.338	53.6665	47.2611	81.6398	59.5207	44.069	9.56749	12.3301	86.3144	73.3387	60.3202	25.9509	37.7367	75.9073	65.6514	45.0784	85.6121	97.0843	108.929	88.7884	113.222	46.0604	57.2764	95.4211	22.072	19.3639	65.7856	47.2757	11.8516	12.4813	10.6171	12.6229	89.0035	123.222	48.8836	25.392	95.3213	87.746
AJUBA	78.8042	63.8536	59.4726	42.0266	8.09564	33.3497	58.0589	7.558	10.1167	21.9506	90.4394	123.625	170.438	13.638	100.809	31.2411	24.2777	89.9936	19.4574	89.9062	10.1441	7.58599	12.4536	46.9132	4.98799	30.5326	60.2838	130.506	17.5593	96.211	11.61	17.491	54.6546	87.8998	7.56328	57.0247	92.6	51.8179	8.52065	122.747	79.3121	17.0224	67.7265	72.9672	93.4446	23.1205	43.9997	83.2258	62.7803
AK023627 /// TCTE3	100.51	89.532	145.649	110.877	140.529	97.6512	76.4568	96.3279	133.979	82.3458	110.441	155.162	230.312	143.103	120.85	97.2238	187.469	168.257	127.081	144.433	86.9854	80.4529	103.073	76.7868	130.202	113.835	147.468	142.966	112.604	74.2331	66.2253	133.343	86.9637	21.806	65.3245	80.8481	59.3213	74.6957	93.8466	109.807	113.377	68.81	91.726	102.546	85.7753	73.3969	187.198	64.7687	57.7548
AK024119 /// CTC-378H22.2	264.433	213.681	231.546	246.206	282.228	186.198	325.634	178.158	233.852	180.968	329.395	354.44	240.018	223.668	206.475	144.293	233.19	279.529	251.1	318.027	249.105	203.765	273.353	202.278	360.023	231.516	336.31	278.155	203.377	246.94	255.391	268.239	270.356	388.773	223.186	261.886	101.7	133.868	202.623	33.9824	216.916	158.828	199.899	152.737	116.956	319.311	279.002	283.989	245.564
AK074476	39.2028	77.8852	64.877	45.1009	111.635	132.065	45.2521	25.3122	44.3174	124.177	68.1296	66.8133	64.6003	120.32	77.6585	116.925	33.0443	51.9106	61.2868	79.8046	101.395	76.8798	85.5378	55.1194	71.9972	90.4658	137.188	171.482	95.7591	50.6277	98.6869	57.2068	126.578	59.2463	50.6755	65.1397	48.7899	79.2872	120.898	94.5364	103.111	115.118	86.7639	79.8392	90.9005	49.1254	127.694	65.0004	79.672
AK091028 /// GMDS-AS1	125.707	228.06	123.225	197.025	200.417	141.716	102.546	119.353	205.744	146.082	205.122	205.252	252.036	125.8	155.275	377.214	322.471	207.079	156.542	231.233	230.053	149.813	88.9768	118.182	192.822	188.289	118.037	214.301	236.345	228.466	218.971	160.902	75.0272	235.749	72.9623	108.585	113.649	173.824	173.274	214.047	116.998	159.452	142.272	178.338	163.743	138.861	125.311	96.1947	129.629
AK093256 /// RP3-486I3.7	5.95351	58.1112	30.9379	68.4131	6.44052	39.835	27.0064	46.3741	41.7473	19.2931	48.2774	2.70791	47.1411	34.1857	36.4433	84.2229	51.9634	82.6655	98.1233	63.7806	30.9375	26.7149	84.5789	4.84812	4.14259	38.9807	16.3571	38.722	51.6735	7.7992	41.1818	4.39189	40.3102	30.7382	5.92388	15.5399	50.0325	21.2592	32.2802	58.3257	33.8822	6.31272	7.53546	47.2853	29.6837	37.3781	12.1096	3.57506	48.5782
AK094644	41.4563	108.37	25.2057	7.4446	33.9044	3.88966	34.1622	35.5695	18.1788	15.5913	51.5741	96.7076	12.3764	9.37103	15.3948	57.5325	78.1942	86.7548	53.8178	38.2389	59.6543	43.146	45.9848	23.791	54.814	7.16737	67.1671	74.9911	21.952	40.5848	42.7617	53.1338	57.1423	83.5373	56.5719	44.2467	5.84827	39.6671	60.0863	57.7275	28.7782	3.23562	7.64751	61.8906	6.97916	51.4351	38.8627	28.5856	54.4942
AK1	546.238	482.699	414.809	714.25	629.677	529.11	621.655	531.383	645.17	430.242	572.551	214.491	709.135	528.51	512.288	645.557	513.317	490.373	661.434	765.743	486.279	528.881	359.668	390.884	393.907	481.234	565.408	482.716	459.855	224.044	548.053	359.309	310.545	437.878	539.571	370.143	474.729	475.761	533.342	252.044	480.209	267.265	352.484	634.036	659.895	336.222	670.448	613.92	693.417
AK123826 /// RP11-510M2.2	131.55	149.101	143.891	143.721	99.7218	174.371	130.361	101.544	103.848	200.939	175.849	194.2	148.99	113.47	203.896	44.8447	174.693	135.237	161.455	169.959	159.984	91.1473	198.696	132.62	131.688	146.103	52.8112	157.939	147.25	196.807	122.289	177.139	159.526	171.506	107.14	68.0224	196.863	225.159	129.449	141.862	89.0608	201.019	118.047	111.438	208.063	142.356	115.886	193.781	159.256
AK2	1336.12	1839.65	1512.34	1529.12	1566.18	1486.6	1585.67	1324.25	1696	1708.45	1293.4	2294.44	1146.95	1631.29	1428.32	1215.8	1375.48	1567.98	1185.8	1352.83	1350.05	960.306	1377.65	1817.46	1390.48	1544.37	1292.74	1993.37	1995.93	1964.94	1836.2	1923.4	1978.47	1630.3	1400.69	1499.27	1881.65	2037.17	1510.22	1706.28	1653.9	1830.31	1576.74	1880.13	1504.6	1741.48	1369.41	1622.63	1812.77
AK291611 /// TRGV7 /// TRGV7	294.695	373.378	287.197	380.541	192.471	162.467	213.239	219.381	250.195	125.081	279.88	475.019	338.161	317.225	174.06	376.096	257.367	192.617	190.255	278.676	204.016	180.412	129.563	25.7863	109.334	54.7654	272.646	329.411	221.413	133.177	135.004	130.826	32.2988	187.745	143.56	15.2846	118.862	44.0292	151.547	342.823	77.9175	32.3745	150.394	29.168	21.214	195.159	345.19	181.389	25.552
AK3	2037.32	2305.24	2461.57	2645.88	2109.33	2346.87	2472.75	2218.18	2533.06	1271.53	1991.37	1912.01	2172.46	1927.66	2310.73	2144.61	1700.77	2080.72	1995.54	2370.79	1776.05	1517.7	1541.49	1244.53	1815.41	2223.36	2102.5	2145.97	2112.94	1922.28	1823.41	1369.36	1217.46	1247.2	1498.98	1550.45	1782.92	2910.52	1396.45	1894.64	1718.89	1350.14	1163.49	1963.37	1660.36	1529.27	1727.68	1539.36	1747.68
AK5	352.136	543.406	676.854	575.99	553.723	338.658	649.218	578.413	562.282	394.571	304.15	702.039	502.161	350.019	467.8	439.135	366.609	650.055	616.764	632.316	272.593	296.694	242.092	114.695	181.8	174.012	637.583	258.062	447.692	980.295	594.995	767.361	169.98	273.146	421.364	267.447	250.96	221.982	463.058	217.459	287.769	37.877	154.49	324.327	360.934	280.013	150.863	234.409	510.385
AK6 /// TAF9	1716.36	2343.75	2003.5	2095.76	2138.37	2180.42	2854.02	1887.43	2215.05	2054.87	2485.43	3001.47	2328.65	2082.33	2519.77	2183.77	2384.4	2734.97	2576.44	2542.39	1712.37	1635.74	2184.53	2364.96	2313.44	2316.3	3133.16	2497.18	2277.55	2369.04	2763.93	2475.58	3182.71	2759.51	2588.3	2870.78	2534.16	2379.61	2545.82	2653.25	2891.37	3000.94	2947.41	2950.94	2549.68	2632.23	2164.16	2562.09	2692.6
AK7	117.585	108.753	125.626	131.746	155.372	145.944	167.296	90.5706	199.84	171.982	210.507	153.315	160.94	187.438	205.158	234.931	246.012	223.785	154.395	211.622	154.334	148.662	13.8603	65.6721	154.793	69.6595	179.226	136.447	126.904	216.8	185.657	133.183	278.233	106.308	156.077	68.8473	138.522	165.127	156.133	112.986	186.443	171.424	105.087	153.727	48.2211	142.999	252.108	50.74	177.638
AK8	207.211	321.198	160.841	191.484	250.181	159.41	277.17	135.683	275.192	279.506	344.269	363.366	380.297	301.813	437.963	325.563	500.256	399.563	302.2	360.979	238.281	315.357	372.245	371.294	263.87	246.104	327.386	258.461	256.879	331.875	226.568	240.542	127.292	235.49	160.717	151.211	154.408	391.489	198.404	173.267	206.775	255.307	216.28	145.574	354.286	216.196	195.016	167.097	145.011
AK9	312.297	244.497	361.936	332.143	356.323	343.631	409.1	302.177	389.826	232.977	177.373	346.478	193.285	320.981	186.139	238.845	222.544	200.919	132.489	222.331	230.313	181.339	164.812	140.44	186.442	158.816	307.025	124.729	222.582	186.144	149.477	151.6	230.385	212.091	188.027	127.46	104.477	156.074	195.91	155.039	176.41	275.402	184.002	199.317	136.307	181.558	170.577	157.353	119.031
AKAP1	1230.16	1108.11	1255.78	1497.41	1199.27	1171.11	1309.94	1058.54	1777.68	1294.04	1293.86	967.971	1275.11	1144	1447.2	1263.5	1403.61	1395.66	1363.14	1483.12	1278.68	1197.41	1310.2	964.405	1432.95	1535.72	1017.56	1221.97	1297.48	1315.13	1267.26	907.638	607.349	695.584	661.588	416.071	1254.43	1154.34	768.439	718.303	652.946	676.874	584.468	567.851	959.398	752.712	516.324	533.14	738.391
AKAP10	1240.62	529.417	1011.02	1452.66	1219.75	1025.56	1100.19	1388.55	1154.85	1120.11	1079.42	365.656	1184.01	853.982	1183.03	1435.95	1271.69	1045.6	971.226	1130.81	1134.29	1214.11	925.963	944.794	1289.1	1012.74	738.25	757.357	521.751	555.376	737.118	573.325	591.743	585.28	881.995	722.327	699.675	644.324	1016.17	1321.9	1063.69	1099.39	651.377	720.331	1168.47	1070.25	1066.77	1039.58	1123.35
AKAP11	2808.62	2477.9	2685.75	2452.53	2584.07	2529.06	2975.84	2364.83	2541.06	2118.23	2621.27	2067.27	3107.3	2570.03	2621.13	2962.45	2742.31	2248.73	2628.44	3030.86	2214.88	2088.08	1972.67	1673.23	2641.1	2206.7	2094.5	2148.49	3022.3	2402.94	2662.12	1866.86	1319.2	1440.58	2362.12	1612.3	2241.36	1470.14	1868.85	2484.15	1583.75	1290.78	1553.55	2262.33	2098.3	1580.53	1504.28	1379.79	2032.2
AKAP12	340.049	191.087	394.392	329.403	242.258	621.55	457.815	407.096	330.241	345.753	409.854	559.083	364.437	636.995	307.68	162.571	243.487	786.002	255.812	300.308	541.415	174.995	67.7385	80.3094	57.7809	48.868	377.887	127.647	563.184	297.236	640.445	357.257	9.2961	13.7708	242.77	211.708	267.737	54.7605	289.108	155.256	285.688	9.99434	49.6818	4.70738	355.082	146.411	122.638	60.4618	86.1872
AKAP13	4343.57	3698.5	3756.23	4219.33	4002.55	5119.39	3380.85	4296.58	3702.06	5425.49	4630.87	2268.68	3670.87	4615.25	3385.58	3723.92	4048.15	3943.27	4483.77	3308.97	4652.76	4165.69	6872.23	5118.82	5206.03	5363.58	4113.01	2422.59	3492.97	2934.05	3668	4256.7	7089.72	6698.45	6620.25	5982.6	4411.15	3725.07	5173.79	3991.05	4959.36	5783.21	5922.25	4324.5	4424.27	6665.34	5469.48	6912	4502.57
AKAP14	5.52061	41.5862	17.5387	60.6767	46.3905	29.4865	56.8216	30.7501	7.28294	21.2694	17.6149	47.6854	15.2548	3.86665	6.95328	64.6319	73.9248	35.9964	27.6056	19.7314	16.9799	63.8639	21.5526	53.6483	6.10005	3.23253	9.56873	20.5832	17.2801	8.86181	6.95431	18.459	26.7235	30.0352	8.43743	4.52925	13.6149	55.7446	24.419	39.5849	31.8818	13.7464	27.4397	5.63926	32.5122	1.80162	21.148	38.3075	8.42407
AKAP17A	2669.19	2497.78	3330.67	2951.13	2915.19	2600.61	2700.24	2785.63	2570.33	2693.1	2939.44	2816.03	3184.45	2247.67	2528.27	2886.6	2969.88	2871.7	2574.48	3378.35	3053.39	2975.33	2592.69	2237.21	3081.93	2969.59	3261.97	2608.84	2895.3	2466.19	3016.93	2568.58	2447.87	3149.83	2513.67	2243.27	2118.78	2166.83	2798.24	2550.85	2417.65	2425.45	2670.45	2243.04	2326.9	2560.21	2605.29	2197.31	2477.72
AKAP3	21.2385	15.7597	15.6897	21.8	28.0285	17.5181	16.2489	19.1765	18.7883	23.3987	20.7193	30.0685	20.3733	24.519	24.1655	21.0209	26.9118	23.8353	24.6165	19.1465	24.8726	20.7325	26.2656	21.0473	22.2994	21.1095	19.7573	26.4777	13.7907	17.913	19.4976	24.6847	18.076	21.3736	26.7862	8.40459	16.0892	24.8955	20.6667	24.6838	27.1427	22.9695	16.7121	26.4066	26.6128	21.1607	36.7773	17.1595	24.7648
AKAP4	52.2475	100.897	37.6011	25.1808	18.9567	11.1669	15.8699	14.8388	70.4597	79.8683	81.335	92.7039	80.8626	131.251	15.657	97.4101	99.9858	153.118	82.4067	68.9342	48.7615	32.062	37.5406	57.0331	52.993	96.9909	49.9868	129.246	12.7343	34.8335	70.468	35.0958	63.4195	52.8286	43.8043	78.5479	41.7855	96.6617	54.1888	14.1626	139.57	60.5842	39.2596	16.2039	13.2799	77.0563	141.682	42.7418	14.322
AKAP5	126.261	45.6095	59.4195	69.4326	86.6263	73.4493	17.6167	60.6805	8.58985	40.0552	40.2273	88.8652	89.8349	108.196	122.971	104.956	38.9891	45.0042	93.1487	56.0574	75.2023	75.8973	54.8241	22.1687	6.7024	24.0493	99.7249	29.3316	12.7695	12.5647	58.8357	63.1566	38.9331	22.505	5.87283	39.9575	8.28427	70.1799	11.6037	8.9506	32.2003	5.72499	25.2149	74.5029	32.8147	43.5386	63.8619	14.975	33.738
AKAP6	113.838	63.5178	173.434	140.926	105.897	118.992	148.043	102.623	154.702	147.475	199.689	98.3579	203.469	162.572	182.714	160.04	168.369	145.079	157.009	218.186	73.1136	143.137	171.968	108.06	127.519	118.272	122.937	123.137	143.059	120.804	139.12	76.0969	106.998	133.34	86.9037	44.3858	102.102	162.776	106.158	135.884	81.0268	129.781	118.827	134.568	89.7388	84.481	146.785	123.325	49.9728
AKAP7	1181.26	1256.75	1283.87	1005.14	1055.31	1016.31	1244.22	676.842	1060.2	1003.61	979.132	1420.51	1138.11	920.7	1267.39	1334.77	939.447	840.351	1149.95	1214.78	945.939	762.438	897.315	779.666	769.352	871.888	1005.12	1396.68	1356.03	1462.67	1353.19	1459.9	668.308	859.71	938.049	548.297	1314.55	696.064	948.194	690.653	645.66	441.792	627.425	959.285	819.866	697.129	431.192	471.394	1052.78
AKAP8	1138.24	903.231	1213.16	1164.01	1193.38	1039.35	1154.79	1036.28	1251.19	1061.51	1325.37	999.564	1315.78	1168.18	1467.09	1308.44	1074.63	1276.23	1159.57	1356.75	1170.19	1104.75	1044.6	1005.06	1174.68	1210.74	1215.54	1170.51	1459.82	1168.63	1343.45	1097.73	1026.81	1006.18	970.039	899.078	888.064	931.332	1006.66	1301.38	821.054	1031.2	1158.17	1167.55	1047.91	996.631	1128.88	866.989	1166.38
AKAP8L	845.472	626.298	929.275	844.743	965.154	791.942	932.214	927.14	1028.26	898.106	906.751	970.147	876.37	943.517	994.519	1025.33	967.75	862.275	993.207	1109.32	933.713	901.237	840.197	830.391	852.676	940.805	1328.8	1033.81	793.527	874.956	957.996	833.896	844.817	1082.51	896.566	1013.57	711.102	851.377	1111.77	1007.29	796.871	809.684	1162.92	736.759	953.816	899.914	959.527	739.038	870.292
AKAP9	580.029	389.143	1088.03	772.422	465.639	505.824	1024.28	619.517	733.189	929.258	545.971	154.707	994.943	742.223	1284.99	1032.39	754.119	1025.49	400.253	625.312	410.519	659.018	790.415	202.435	490.162	553.183	579.078	115.163	306.077	315.029	381.163	256.591	176.534	314.477	240.525	99.4848	906.922	846.487	254.39	142.436	251.801	374.43	169.381	266.087	427.511	125.183	342.849	292.066	191.207
AKIP1	769.61	787.879	509.522	718.192	859.233	797.1	670.868	691.535	715.943	940.051	806.599	779.843	658.083	605.251	445.017	836.814	867.099	818.63	706.48	641.936	718.378	543.629	813.628	949.072	670.952	687.046	642.872	577.953	834.903	834.39	825.916	841.3	918.184	657.061	532.939	652.246	734.281	525.583	747.735	737.339	536.276	836.857	437.93	692.317	759.292	727.067	631.58	687.599	347.872
AKIRIN1	2156.42	1959.05	2041.91	1961.78	2041.05	1876.03	2247.29	2233.87	2212.33	2039.3	2282.99	2960.28	2320.41	2284.1	2209.94	2483.03	2068.11	2096.79	2379.51	2803.64	1930.36	2981.75	1635.55	2377.11	2178.86	2074.53	2651.4	2459.34	2839.68	2872.33	2668.42	2673.12	1602.57	1606.52	1672	1667.19	2874.22	2340.09	1893.63	1705.93	1620.26	2008.36	2036.19	1760.3	1694.49	1556.19	1345.2	1164.26	1599.89
AKIRIN2	1724.8	1573.96	1457.17	1619.6	1397.99	1752.09	1416.85	1875.97	1888.74	2292.11	2012.9	1757.89	1639.42	1810.01	1938.52	1908.47	2145.91	1596.36	1974.19	1973.7	1951.52	3235.34	3009.47	2770.79	2149.47	1938.47	2071.47	2116.08	2120.31	2641.74	2595.39	2838.67	1034.67	1064.39	1017.09	1158.8	2295.3	1959.76	1130.8	1191.18	1025.75	1533.29	1487.36	961.935	1040.03	1297	1103.59	822.496	624.918
AKNA	6758.23	5271.83	6023.48	5727.52	6354.19	5652.43	5198.18	5169.88	5073.82	4325.19	3827.13	4316.47	4698.69	4971.02	4565.02	4446.22	4426.83	4178.26	5440.51	5040.7	5485.48	6598.16	5674.63	4315.4	6125.44	5313.45	4828.72	5069.37	5031.79	4429.26	3935.9	3924.53	5423.12	8346.68	6547.09	5040.58	5082.6	6189.99	5225.38	6290.36	3801.66	2963.3	6814.93	4487.23	5391.42	5124.49	5844.26	5478.71	5183.53
AKNAD1	31.0696	85.8006	24.5003	79.3667	57.2027	66.8513	16.3444	7.37181	71.8457	69.2505	33.466	24.7846	60.9519	66.3674	26.1896	61.9097	59.8968	150.244	74.5264	44.3583	88.9764	68.106	4.39322	88.6815	39.976	45.0095	71.7077	59.2171	96.9547	49.0543	64.0892	29.4935	23.0514	51.2531	36.3824	2.91415	79.4306	73.4759	61.6584	18.5255	6.27272	39.2098	64.4937	8.90391	52.896	4.55687	31.4237	34.2961	56.3879
AKR1A1	1672.38	1795.47	1657.52	1998.1	1673.28	2067.14	1850.39	1584.37	1903.45	1866.29	1728.28	2257.66	1562.84	1460.45	1263.57	1505.49	1478.5	1990.13	1550.06	1440.99	1736.87	1022.74	1857.05	1920.27	2036.59	1608.45	1555.3	2269.13	2337.43	2252.5	2527.39	2178.76	4616.41	4250.75	2872.18	4560.38	2326.36	1912.9	2867.76	3464.98	4217.35	3050.91	4017.56	2918.35	3023.96	5248.96	3229.62	4580.29	3733.86
AKR1B1	3652.74	3072.1	3036.71	3311.08	3379.26	3527.52	3953.51	2516.77	3029.22	2615.11	2303.8	3559.05	2904.16	2419.61	2466.35	2651.74	1618.72	2597.36	2805.96	2896.22	2730.46	1729.97	3330.88	2380.44	2404.48	2740.27	3095.9	3489.78	3465.04	3041.22	2697.04	1883.39	4125.26	3538.59	3896.01	3546.7	2142.16	3370.08	3047.14	2240.55	3827.05	3519.15	2897.78	4151.24	3644.87	3287.61	4810.52	3214.66	2268.81
AKR1B10	20.9885	105.866	15.6418	72.5643	95.6903	60.8472	93.4618	79.1325	93.2952	28.2247	61.2822	61.71	20.6354	65.3465	52.0206	79.6522	22.4269	82.9744	122.298	17.114	103.494	28.498	19.1257	49.5852	84.1276	11.9551	102.92	155.234	95.7287	107.425	86.5819	97.7128	67.206	85.3717	37.5864	141.72	106.836	158.703	83.0942	112.529	16.6804	110.056	18.0483	93.4396	41.9431	119.3	50.2532	37.1794	12.236
AKR1C1	249.699	363.17	292.495	369.243	349.733	352.039	349.223	308.406	357.848	415.189	350.641	258.331	379.65	337.214	466.948	435.403	296.964	275.922	229.697	333.307	352.04	354.042	329.591	307.596	236.162	277.309	312.55	379.696	371.464	320.707	541.244	364.142	181.89	375.246	269.157	215.241	420.355	270.203	360.767	332.655	281.337	244.599	398.999	260.066	379.55	298.239	369.43	294.696	338.178
AKR1C2 /// LOC101930400	277.531	150.443	58.7751	97.5599	68.4546	19.7131	162.01	39.0832	54.6877	190.796	33.9143	153.765	165.901	80.6958	133.761	37.5704	46.3169	344.769	25.526	42.1451	193.06	198.988	127.082	191.563	61.3375	66.4811	36.2123	86.3272	44.1338	186.382	248.24	26.2867	31.0542	60.3563	103.927	103.333	201.8	52.7907	200.506	40.0876	129.367	128.694	134.145	29.6396	22.0957	38.5419	40.711	29.7079	67.8594
AKR1C3	981.014	1464.67	475.08	672.741	1599.1	621.572	425.035	968.428	537.424	812.518	474.368	1896.55	614.934	1203.43	1203.34	1165.21	454.022	340.134	885.033	585.901	839.067	561.4	832.021	322.297	93.3868	297.137	600.194	914.95	778.868	230.916	966.643	1681.28	350.159	1334.94	972.407	760.714	393.463	245.517	517.102	171.291	740.631	242.59	827.465	247.504	803.315	802.297	1095.19	1323.8	478.836
AKR1C4	53.7099	71.9307	61.3588	39.9829	80.1959	46.1135	68.2183	74.4185	33.3299	65.6084	37.8605	13.7355	89.6777	8.83371	82.5869	84.897	64.5484	107.744	117.978	91.6539	46.556	56.1932	42.4294	18.4834	8.5473	71.2829	54.7451	126.156	46.4838	54.127	63.5204	43.3046	51.3338	4.96822	65.4501	45.9161	65.7628	80.1041	65.436	39.5308	3.74839	47.4453	7.52587	40.6442	6.2886	46.9111	15.2349	65.8184	145.34
AKR1C6P	98.5201	94.1093	107.604	59.0594	83.2487	83.7982	65.8498	82.4909	37.6884	156.171	153.781	179.95	166.033	95.1023	93.9334	75.809	91.4272	153.331	23.6886	106.992	107.546	74.9771	133.754	25.5595	38.0491	47.5147	106.099	147.042	128.721	22.3796	183.374	179.202	111.445	63.0262	94.4782	86.4979	87.7342	151.971	136.106	99.4137	82.1644	79.7885	134.94	111.598	152.519	45.4369	118.562	53.1426	43.7013
AKR1D1	29.5307	45.53	1.87734	17.1574	16.1337	22.6131	27.8634	24.0407	3.04273	33.3555	21.5162	82.1127	28.6909	24.1336	3.59439	51.0912	31.0908	52.9248	45.1509	57.5927	26.832	14.5509	30.4591	19.3402	47.9704	14.9613	26.4914	36.9987	12.8342	64.2182	45.8998	34.4684	39.2052	38.5933	49.5996	2.00282	21.9262	39.9487	18.4979	39.6687	14.505	14.4143	25.6952	89.7494	29.87	21.0061	19.42	9.27558	27.8284
AKR1E2	69.228	67.5897	67.86	132.334	86.9876	73.659	79.8604	124.798	106.295	74.1128	103.487	72.0903	123.082	90.8525	130.722	80.3055	50.0519	186.346	112.291	149.519	87.3111	114.596	71.8197	49.3393	105.701	96.9102	113.354	145.939	149.863	132.316	103.004	132.601	109.526	54.9622	76.645	95.5209	49.2974	106.057	61.2563	94.1305	6.45782	77.0064	68.3999	65.4204	104.192	7.13376	103.971	120.6	178.085
AKR7A2	1833.18	2161.14	1935.7	1579.55	1710.34	1358.67	1993.5	1621.72	1537.25	1818.49	1820.07	2161.72	1763.22	1624.6	1430.76	1662.55	1382.17	1767.13	1857.22	1547.81	1747.08	1290.96	2553.96	1590.91	2075.91	1610.8	1570.21	1898.45	2052.45	2194.07	1838.8	1751.62	1905.79	1503.58	1870.94	2163.77	1543.63	1764.42	1815.6	1679.98	1951.65	2378.07	1950.64	1760.94	1719.65	2427.48	2549.53	1739.98	2011.64
AKR7A3	423.405	555.599	550.427	513.532	683.873	358.983	649.002	614.332	463.617	448.453	547.486	646.227	530.778	559.153	500.839	669.411	586.094	594.406	770.355	479.214	507.034	353.473	494.665	564.933	436.4	458.593	350.413	482.365	622.269	951.736	668.182	600.001	408.799	410.86	651.169	510.536	451.337	500.643	647.76	550.121	739.125	474.024	561.262	459.306	419.318	673.475	790.203	512.846	579.469
AKT1	1661.66	1501.99	1100.56	1420.31	1346.64	1340.5	1152.99	1307.42	1266.03	1474.06	1626.5	1354.68	1323.65	1481.42	1191.15	1380.67	1207.64	1030.19	1752.91	1118.38	1480.57	1678.58	1667.23	1467.9	1752.07	1314.23	1730.35	1078.7	1073.86	1081.69	1369.02	1517.26	956.763	1186.27	979.627	1293.84	1246.98	968.943	930.673	1050.18	802.839	1165.03	1368.86	850.611	780.709	805.643	928.815	1090.8	861.67
AKT1S1	205.746	310.276	345.903	273.872	201.489	233.307	242.178	247.283	516.068	347.093	362.942	242.269	281.473	248.156	286.656	353.745	326.14	327.234	278.52	343.789	304.887	187.663	275.489	374.419	396.988	386.483	365.576	148.989	216.116	324.157	309.2	265.821	262.638	282.3	125.883	198.569	329.735	267.525	202.885	62.5612	157.954	300.628	202.477	42.782	177.459	260.429	171.85	293.031	121.377
AKT2	1015.14	1068.88	1283.44	1158.93	1359	929.997	1248.71	1061.46	1234.32	831.03	1192.04	435.323	898.459	934.988	1097.88	1162.19	974.046	928.195	1013.3	1111.69	1184.52	1000.51	799.628	690.332	1344.98	1109.5	1086.82	669.461	852.258	687.044	780.015	483.371	774.247	1005.46	927.631	877.986	753.018	861.388	972.277	1084.65	511.244	601.643	678.814	710.392	862.375	584.889	1363.89	774.228	970.699
AKT3	1132.47	1132.93	983.287	1074.84	1052.65	998.96	1251.68	1155.06	1044.1	812.367	1023.84	963.419	1336.28	1009	993.729	1193.12	1126.1	818.778	1127.05	1053.39	1054.57	668.807	570.04	638.356	582.885	717.427	822.202	617.859	963.016	814.913	825.473	564.989	414.892	490.872	773.622	736.859	839.003	491.661	643.432	767.515	718.93	401.349	512.831	915.515	895.35	534.042	610.734	269.667	1018.76
AKTIP	1255.28	1174.67	1652.8	1621.46	1703.41	1224.97	2205.74	976.644	1400.62	906.543	1139.46	1709.46	1752.72	1045.97	1191.63	1410.57	1239.24	1198.12	1254.7	1486.89	945.699	1329.72	760.017	731.523	836.841	1058.54	1248.67	1227.82	1510.64	1661.35	1136.34	781.486	785.482	1041.85	1264.8	983.12	930.219	743.843	1225.79	1471.8	768.524	757.826	765.736	1266.38	1080.99	912.776	956.691	481.914	1505.99
AL832909 /// LINC00984	1022.08	1611.29	1310.28	1322.19	1018.45	1325.5	1372.45	1647.9	1991.32	3233.51	1484.88	1695.45	1062.68	1161.4	901.201	1380.93	1710.68	1036.45	1653.71	1696.04	1527.03	1163.38	2301.29	1828.11	1105.09	1653.13	1566.54	868.177	989.45	1130.99	1640.42	1322.77	1401.5	1892.94	606.32	1092.19	1860.91	2024.78	1011.01	327.736	652.777	1674.12	1432.27	776.825	803.171	1628.37	1063.37	1140.84	481.702
ALAD	863.354	722.629	907.255	778.709	916.282	848.352	802.293	804.615	734.162	991.189	834.752	774.459	845.703	841.785	668.033	706.997	685.472	741.574	1077.42	934.532	671.998	574.887	794.342	797.281	854.826	739.828	649.325	729.648	928.699	829.817	920.898	800.421	827.737	539.04	705.957	721.823	936.701	810.013	548.288	572.64	471.2	746.024	806.1	566.585	675.997	936.906	759.441	822.855	710.419
ALAS1	936.755	700.701	816.185	720.158	916.933	1035.51	1109.15	1024.43	997.042	1122.79	1066.66	1044.05	781.967	1277.07	804.584	821.343	1061.1	761.183	872.54	719.87	950.787	1560.64	1116.98	1182.45	1306.76	1165.3	661.453	1296.23	989.882	1066.14	1162.28	1335.23	1089.27	945.735	1199.77	1369.87	1259.89	879.27	986.855	877.965	1073.08	1556.21	1246.51	1378.89	1460.51	1627.93	1029.88	1089.14	976.903
ALAS2	313.105	946.015	310.495	11.6865	11.3887	418.545	13.6687	909.167	326.586	11.3907	33.518	383.012	19.0873	1866.85	17.0593	128.779	2140.03	9.709	581.559	379.599	370.558	59.348	322.446	2422.56	55.9836	1010.9	8.91989	14.9252	99.1542	1072.56	11.0599	738.444	310.317	236.221	1554.34	833.162	15409.3	812.033	46.555	19.899	2112.91	1387.76	30.2474	4535.96	108.734	1049.53	626.938	22299	15759.7
ALB	67.1534	50.044	69.8423	39.2205	52.3265	40.4578	42.9391	48.4941	57.9695	76.3352	82.0429	56.5895	96.1235	13.2409	27.4606	46.6955	62.0214	61.4431	57.0446	93.7941	64.6566	41.8553	33.5924	21.3038	41.3797	26.4692	24.0028	71.4912	35.7434	61.6014	41.8828	10.4208	63.3758	26.9987	101.655	73.1029	43.065	52.5148	12.3854	81.3475	84.4009	50.3568	9.60106	82.2123	87.1787	49.2248	55.6535	45.6631	98.9875
ALCAM	760.071	997.458	595.656	672.375	853.993	860.624	703.703	945.715	600.717	955.237	748.215	797.443	894.044	771.255	598.114	637.448	896.903	1179.12	696.311	619.527	661.619	926.926	1709.95	1272.85	1978.64	1126.54	885.558	601.81	791.143	786.06	1128.82	796.267	1603.66	1008.58	1709.95	1200.71	1135.68	1282.56	1269.2	883.452	1158.28	3089.7	1859.91	1870.81	867.188	3126.42	1821.6	1920.46	1240.54
ALDH16A1	740.186	644.581	781.746	689.23	675.851	730.845	691.883	769.335	798.734	814.54	742.371	954.074	728.359	601.317	808.375	646.071	820.581	942.258	727.803	689.158	733.392	536.749	865.847	629.941	838.598	756.338	721.307	1002.52	907.723	664.366	1023.44	780.174	929.79	1029.5	719.349	711.73	779.289	746.005	904.933	1026	935.536	599.476	809.512	848.369	731.457	574.233	973.848	1919.41	891.092
ALDH18A1	789.192	777.375	1040.5	670.524	788.755	813.113	968.56	462.173	662.12	314.509	734.488	1037.54	845.99	554.556	1005.2	891.702	701.082	645.54	847.277	1045.91	468.903	617.278	482.309	428.393	417.764	706.258	809.019	1715.09	793.446	508.615	668.261	536.687	321.311	336.412	442.58	538.611	617.265	920.195	636.457	1000.39	1061.17	225.666	393.746	830.38	674.688	533.264	898.822	454.139	763.048
ALDH1A1	1408.27	644.62	481.481	1323.53	791.313	1478.68	639.337	783.46	948.144	2265.28	827.479	1869.74	894.647	1541.97	1109.82	695.049	1050.49	786.837	965.633	498.217	1340.83	220.348	844.431	1111.95	765.473	794.363	1584.73	674.29	1087.93	1204.29	1437.9	1002.2	1420.25	707.832	630.706	470.875	206.809	482.915	779.711	147.205	449.775	1157.06	1051.72	273.218	273.073	1136.83	467.658	1590.14	418.777
ALDH1A3	22.787	82.0185	25.1467	30.2018	33.4539	29.7096	27.6462	32.1623	33.0376	31.8577	39.1231	25.3641	35.6352	50.5374	46.8392	37.293	67.2785	64.49	38.9246	21.2625	28.8217	33.6439	34.8673	21.5041	20.2409	33.5122	22.3285	50.1831	33.8266	65.0241	37.2422	36.7931	31.1625	45.3456	27.6623	11.7716	33.0647	37.0006	5.62704	34.9656	28.5049	9.49407	12.8483	15.261	15.679	55.43	15.8054	92.9776	30.2558
ALDH1B1	225.907	415.8	330.818	294.64	288.909	189.224	275.221	275.236	323.077	278.57	365.599	419.901	403.608	549.539	469.762	460.415	389.77	432.02	565.081	380.752	300.729	350.694	291.178	234.294	279.436	318.128	465.243	206.246	244.835	270.251	224.869	211.474	153.584	246.485	249.027	274.545	141.405	124.761	265.197	221.528	297.832	322.316	254.577	218.969	352.335	262.567	286.023	234.434	291.39
ALDH1L1	106.183	141.971	138.163	182.673	124.179	161.232	71.3147	134.1	121.438	233.487	200.39	162.634	215.199	188.945	289.77	190.849	136.398	134.013	102.576	152.085	148.359	162.973	275.814	188.109	111.245	133.991	137.699	266.482	156.019	106.64	220.394	205.554	220.159	162.015	160.66	173.699	133.23	179.372	270.978	184.492	201.676	150.398	200.982	87.8324	209.925	257.128	157.673	52.6081	238.674
ALDH1L1-AS2	90.1936	54.1004	69.9758	42.3043	62.233	97.8077	102.741	62.7711	54.5693	33.0794	89.3641	86.8728	103.039	20.6795	51.2358	93.4663	113.809	47.2875	80.6091	127.72	25.7866	71.3126	26.7005	19.0191	92.5757	112.089	45.1761	47.5554	138.938	109.073	57.5468	140.783	86.8492	134.731	83.9647	78.6552	29.1023	113.664	102.689	119.879	94.043	114.74	110.973	94.1866	67.9924	96.442	31.5555	53.6698	90.0535
ALDH1L2	21.6337	105.969	53.1205	33.9932	10.8526	9.92281	11.1967	51.2891	9.37307	15.7948	38.1335	31.7211	84.5087	64.994	72.7993	10.9853	49.9549	55.5357	9.34917	84.4527	47.8938	61.2563	74.605	5.73567	44.7394	66.1639	8.39652	140.3	27.7237	49.8552	58.3085	52.477	5.55605	45.8117	28.2751	47.9412	65.1972	75.0866	39.5839	56.689	15.1828	51.5619	46.6158	13.7701	10.2844	123.667	66.4853	62.5279	5.61904
ALDH2	6642.46	4731.8	3686.09	5251.87	5178.26	6549.76	3254.55	5265.09	5135.68	8103.67	6642.47	7578.14	7081.56	5513.76	4668.41	3022.01	6283.98	6969.75	7697.78	3598.12	7507.22	1771.75	13329.9	10872.6	10173.7	9501.7	6516.42	2949.94	4563.18	7801.44	5805.49	6958.33	12803.1	6388.64	5115.95	6900.33	5574.68	6407.66	6610.98	4579.77	6224.32	15703.5	12652.3	4245.91	4852.59	13639	7126.82	9737.48	3626.67
ALDH3A1	48.3375	17.393	19.3977	10.4775	59.1757	47.1513	42.4287	4.75345	14.6677	12.641	12.8886	9.24801	41.776	59.878	5.34064	24.3246	6.40374	18.4634	37.4237	13.4032	16.1866	30.8958	29.1814	3.62471	39.4729	11.1539	24.2362	58.967	43.0813	57.0462	37.6296	37.7173	29.3168	56.8425	38.7067	5.71145	42.6487	31.3377	70.6276	62.6809	33.5585	13.9296	53.6639	98.0084	46.8307	60.1814	16.0474	19.2785	125.146
ALDH3A2	1044.65	1000.59	1149.9	1263.91	1334.31	1258.57	955.3	1011.07	1193.01	1187.8	927.436	1781.99	1027.1	1057.89	917.462	1047.18	1054.86	1182.08	885.605	903.472	1166.16	464.407	1099.64	1270.03	877.997	1012.28	1050.16	1148.65	1018.65	1269.31	1149.69	1134.16	1200.29	1001.98	978.564	899.309	1087.37	1196.96	771.803	813.273	758.73	921.515	873.496	793.174	1078.63	1316.02	940.945	1288.11	1151.97
ALDH3B1	819.513	702.901	408.26	417.642	540.998	701.038	357.747	611.795	658.107	1062.79	792.646	866.021	426.153	401.388	537.893	576.856	886.033	667.142	851.637	421.47	661.757	338.037	1664.55	1253.96	1097.88	1315.46	671.378	581.25	879.207	1122.31	1434.88	1380.17	1604.75	913.77	718.418	1007.56	1292.11	621.502	645.138	537.339	581.749	1544.95	1186.57	456.288	719.832	1401.4	911.954	1187.99	619.029
ALDH3B2	18.7377	47.3803	36.2857	42.2192	46.1057	63.717	20.8581	31.0867	77.5628	71.4427	72.5077	78.0673	125.808	58.4905	51.9833	52.2501	48.006	121.773	37.7783	80.1399	92.1715	76.878	66.1224	77.7607	11.958	39.0508	92.6013	98.5839	40.324	67.9685	36.8562	71.5951	18.1822	68.0691	62.8092	36.3712	68.6571	80.1987	27.7054	58.3297	95.654	87.3009	24.8272	16.8041	17.6271	55.5998	33.6394	37.2952	15.7515
ALDH4A1	138.398	89.511	71.6413	112.933	113.057	88.7931	69.0564	167.115	50.7856	48.9662	305.163	261.536	255.533	184.481	211.57	183.777	196.886	81.3757	246.917	202.635	59.2564	73.7812	141.103	220.041	160.524	212.833	265.897	165.523	218.948	154.43	195.435	211.899	256.438	219.032	97.0675	267.026	277.755	203.875	188.101	241.321	163.075	234.904	261.15	226.552	209.529	168.82	216.073	522.509	316.547
ALDH5A1	812.459	581.212	839.081	595.783	687.83	655.644	1079.13	427.062	839.195	220.166	502.893	549.142	772.461	535.686	901.523	592.659	648.711	447.983	523.62	871.124	319.303	531.379	360.016	266.433	565.443	612.83	475.922	795.464	822.176	790.445	543.487	316.834	252.275	356.949	654.421	315.786	643.551	202.911	519.336	655.569	375.653	154.24	174.751	544.167	313.964	369.833	349.619	367.992	735.678
ALDH6A1	642.238	583.121	637.635	670.675	718.213	646.617	690.919	489.773	618.655	500.628	681.221	669.413	666.911	610.291	667.866	645.937	560.201	640.967	676.904	627.015	614.541	413.527	465.856	466.093	738.26	556.371	622.932	508.413	895.712	709.847	635.624	546.413	370.537	365.307	459.956	291.906	562.338	384.351	428.423	346.13	400.363	355.697	343.246	537.072	275.339	378.825	480.649	415.046	532.728
ALDH7A1	26.7634	100.268	102.759	100.544	69.0581	70.4815	62.325	21.1898	63.5601	50.4227	19.7447	79.4025	122.229	65.5067	133.099	79.9533	45.2647	100.084	124.583	141.727	68.871	92.5012	25.2745	62.6223	108.259	57.1521	94.5499	184.381	133.798	124.147	105.272	10.9135	75.5093	101.854	87.2881	86.3924	90.3843	146.697	108.867	130.145	20.4883	75.8195	40.2385	174.006	78.7939	128.843	82.515	83.4005	75.5803
ALDH8A1	49.9547	78.8384	70.6748	119.588	107.937	112.168	90.7966	105.082	53.5132	39.2585	128.313	93.9009	140.97	153.718	148.98	116.28	112.446	45.745	51.0214	116.243	164.69	107.628	92.3467	117.836	82.9524	179.042	133.807	95.3209	121.035	73.9457	86.6999	75.4373	80.1993	47.1977	103.152	68.4282	79.4111	168.032	84.5259	63.9896	87.009	72.9979	93.6952	32.0068	85.5322	133.499	87.5105	103.782	173.439
ALDH9A1	3159.04	2647.87	2488.37	2532.83	2738.18	3375.52	1923.49	2221.35	2312.1	2129.55	2635.95	2834.71	2227.86	2391.26	2012.45	2216.85	2028.82	1847.38	2611.03	2295.56	2591.45	2913.42	3388.35	2759.07	3158.08	3090.77	1578.1	3101.07	2842.73	2989.86	2759.02	2646.31	3358.38	2865.54	3513.84	3091.16	4044.21	2824.49	2788.6	2907.48	2812.92	2721.31	2851.26	3001.35	2466.19	3648.53	3049.72	3193.9	2882.52
ALDOA	12748.3	16096.1	12585.6	11236.1	12720.7	14266.3	13680	15564.2	12858.3	16066.7	14928.7	21713.3	10801.4	13983.5	14576.5	11116.7	13084.2	15671.5	15188	10232.8	15271.9	14628.1	25861.5	19734.3	16797.4	18099.9	15743.8	15064.4	14355.9	17391.1	13368.4	16149.4	35102.7	32685.1	25070.5	33240.1	26626.4	20948.6	22822.1	22914.5	26891.3	33096.6	39815.3	31783.4	27111.7	35747.4	23575	32440.3	27869.7
ALDOAP2	27.16	95.8129	23.8763	5.97942	21.474	51.8356	8.8672	4.74771	7.2009	4.95867	13.7361	5.82522	55.0375	7.30792	14.4588	73.1867	29.8668	11.6031	5.94935	23.75	28.553	46.2699	32.7836	6.02926	6.0192	8.71901	8.0243	14.5815	8.51584	9.46192	11.1756	22.6852	17.3415	6.69069	7.73386	25.894	9.34109	129.417	12.6193	7.45522	27.9049	26.9195	60.8042	8.87932	5.35587	20.6869	56.6964	11.3322	9.19939
ALDOB	277.299	293.983	259.688	234.182	238.878	209.497	207.685	196.683	293.175	282.521	344.721	376.276	345.608	294.495	372.469	359.546	350.748	329.928	394.89	264.313	382.411	246.256	385.14	198.095	274.663	253.464	362.42	416.17	328.213	298.915	325.293	345.937	371.657	318.474	319.382	262.444	254.519	315.597	376.726	267.839	435.402	343.053	245.054	357.365	228.881	328.336	264.369	337.026	352.459
ALDOC	580.769	767.576	646.231	657.574	681.096	559.872	792.873	513.902	596.733	548.309	474.561	1009.51	621.563	667.618	646.492	556.197	713.811	741.952	525.482	760.547	533.835	545.74	382.373	400.865	503.185	458.013	716.692	518.897	535.726	690.406	634.419	518.499	526.413	722.672	740.857	591.986	398.314	555.11	754.841	642.092	655.837	370.381	618.416	1113.04	602.484	529.479	450.217	347.259	884.784
ALG1	305.554	284.445	246.979	316.749	248.192	309.411	232.292	255.429	209.163	296.354	314.99	235.64	229.44	299.455	196.845	241.183	252.752	211.328	229.134	208.915	198.982	127.874	317.993	278.028	229.911	291.152	171.608	436.966	326.541	293.086	301.274	305.483	337.831	355.222	266.765	368.813	232.834	253.558	263.938	446.201	473.972	267.553	293.089	235.356	366.935	413.289	539.99	329.376	340.793
ALG10	108.822	99.5271	134.198	101.313	59.1361	132.229	108.886	146.754	170.865	155.813	80.7189	14.7482	78.3736	94.0658	115.106	58.23	123.229	82.8522	71.4424	105.585	146.343	89.3596	62.5911	159.234	115.452	114.781	77.7817	149.141	128.658	120.221	102.613	155.505	56.7874	88.0903	124.519	93.9358	151.57	113.175	81.4584	144.378	124.081	120.691	60.4728	135.981	61.8512	96.2864	66.5446	38.323	13.6303
ALG10 /// ALG10B	201.586	153.614	217.03	329.26	226.224	172.623	294.912	211.721	248.127	178.655	218.221	61.7218	297.049	192.779	285.481	313.936	247.757	183.823	207.24	291.046	167.942	213.073	137.614	137.547	292.378	194.86	155.47	126.776	260.393	179.593	248.693	127.934	12.2528	61.3586	75.4108	47.968	132.724	120.865	94.0038	79.3748	93.9347	57.8393	77.3154	62.3221	98.4627	70.5704	52.4296	27.6401	111.19
ALG11 /// UTP14C	1250.24	1184.66	1053.99	1191.16	1143.78	1069.55	1392.91	1117.08	1114.49	861.861	1092.69	948.264	1199.01	1398.71	1199.4	1242.12	1082.19	753.943	1014.76	1140.95	1065.45	1030.74	998.316	1157.99	1185.29	1195.99	644.215	1209.44	1357.92	1153.82	988.101	996.225	812.591	713.781	1343.56	1273.63	1195.91	603.377	1124.99	1381.22	1431.21	1019.88	925.629	1288.32	1368.36	1110.57	979.313	1094.5	1394.87
ALG12	273.057	198.595	268.404	282.824	302.253	223.331	197.644	201.347	217.526	171.052	221.364	289.538	177.597	209.197	197.643	255.418	249.373	133.931	265.244	174.869	156.955	154.888	120.92	185.039	149.996	197.91	248.097	183.224	120.954	156.961	249.062	156.969	228.601	279.632	235.122	115.584	250.821	157.212	198.289	158.829	116.538	217.643	187.855	105.137	219.754	193.389	279.439	213.23	195.979
ALG13	1553.15	2000.73	1706.86	1357.04	1375.09	1128.91	2472.56	1868.96	2109.35	2197.32	2345.01	1898.34	1947.8	2270.25	2180.1	2144.35	1679.25	2605.82	2238.03	2789.94	2189.36	1956.98	2088.1	2938.29	2100.95	1674.82	2828.38	2623.25	2373.88	3372.59	3461.78	2312.81	718.398	700.51	801.797	749.67	1340.95	1109.32	631.439	781.812	676.676	466.558	1318.1	943.679	1095.13	557.122	464.714	571.696	591.52
ALG14	258.692	342.669	344.127	273.64	286.674	293.306	305.286	249.369	278.752	237.325	363.519	328.859	247.821	242.148	315.108	264.051	190.49	335.368	333.887	340.152	249.21	167.9	351.12	342.85	207.826	337.943	238.63	598.658	293.425	287.855	338.771	259.595	308.693	164.487	234.946	366.152	298.987	336.915	283.412	409.041	657.037	203.813	247.003	336.168	409.579	255.344	532.399	326.501	288.483
ALG2	1307.71	1529.42	977.821	1215.92	1187.69	1744.23	1720.22	1332.31	1121.38	959.301	1222.48	1309.56	1266.51	1366.72	1071.22	1338.42	1116.41	872.019	964.957	1048	1147.29	976.999	989.921	1408.67	1044.65	1362.02	1069.69	2016.39	1566.93	1672.58	1668.02	1236.96	1322.24	1025.21	1294.71	1332.75	1679.52	953.499	1162.73	1340	1875.29	1104.78	1114.31	1274.5	1697.46	1513.85	1353.59	1492.41	1192.73
ALG3	740.995	685.726	702.178	737.903	709.676	778.028	784.817	757.383	736.811	839.726	803.808	819.679	796.689	734.18	795.961	740.516	740.361	789.795	820.363	766.732	760.626	622.915	969.986	986.258	767.166	820.132	779.958	984.196	1016.85	975.838	980.078	900.888	840.822	940.522	776.248	864.098	779.093	703.911	698.08	774.711	913.972	802.822	806.974	1053.47	899.716	1038.74	741.057	1006.67	887.541
ALG5	2289.54	2518.22	2259.3	2348.7	2224.2	2558.63	2194.47	1909.5	2216.83	2296.81	2263.08	2929.64	2085.43	2092.61	2124.31	2233.02	1747.35	2372.94	2021.2	2172.65	2275.85	1405.42	2227.15	2067.08	2082.69	2248.18	2518.14	3386.77	2591.03	2391.82	2545.24	2351.97	2537.28	2156.72	2238.87	2943.2	2740.93	2779.55	2127.17	3503.58	4507.66	2140.18	2257.85	2770.52	2977.2	2603.98	3691.62	2480.94	2014.66
ALG6	1560.57	1530.75	1483.82	1350.32	1485.3	1582.06	1573.25	1406.78	1550.79	1356.43	1431.17	1532.48	1436.33	1469.11	1267.43	1430.12	1497.6	1204.04	1414.7	1341.43	1391.62	1166.25	1458.21	1557.84	1472.7	1613.99	1101.28	1678.26	1525.98	1453.18	1353.33	1536.86	1246.4	994.947	1256.46	1213.28	1415.77	1494.91	1251.95	1259.27	1418.88	1430.54	1307.62	1317.68	1390.98	1322.48	1164.15	1091.72	1310.97
ALG8	1047.52	1017.97	1008.71	1069.91	1016.93	936.793	1014.04	925.608	978.33	1069.12	1049.66	1342.42	1176.87	1016.42	1089.25	1103.58	1144.66	963.465	929.312	972.763	839.977	674.471	805.873	1026.02	808.894	926.215	841.199	1222.13	1290.9	1101.66	1071.71	979.992	987.836	1112.33	1055.6	1097.74	1083.73	933.269	1039.05	1398.93	1870.94	922.288	1084.8	1277.86	1119.73	1302.4	1078.35	1249.81	1269
ALG9	381.382	274.442	390.553	435.649	413.811	338.168	430.13	310.084	395.841	359.232	299.848	318.685	369.615	272.225	275.288	341.033	338.983	424.669	317.997	218.052	389.094	263.352	312.089	283.857	235.027	335.211	436.224	451.638	343.789	335.332	318.441	263.474	528.579	462.374	381.311	466.847	313.212	386.054	420.395	732.472	754.218	302.701	447.285	490.466	539.271	321.639	622.962	300.087	468.972
ALK	141.235	166.524	126.471	148.186	203.453	140.168	205.63	134.014	130.765	164.158	189.601	130.852	57.4313	115.454	202.816	182.978	177.889	204.039	121.909	186.749	142.313	110.207	71.3327	96.6152	135.734	146.226	158.197	152.729	157.198	208.649	143.31	94.1869	184.587	80.5064	100.561	63.4581	238.115	212.055	53.9345	125.536	74.2716	78.357	120.831	163.461	80.143	130.023	103.479	160.1	194.59
ALKBH1	869.574	753.638	555.411	661.518	762.881	1003.57	1033.37	762.808	668.574	534.388	725.231	700.867	820.189	1135.17	856.53	979.889	855.017	662.186	672.496	620.055	667.658	718.566	474.38	679.975	650.229	855.971	575.397	964.747	877.708	938.429	963.513	644.643	705.182	532.32	962.47	881.7	839.607	421.342	821.322	972.144	931.599	660.695	634.005	985.226	1119.42	850.913	670.074	926.92	1130.8
ALKBH2	375.82	288.847	327.921	371.965	340.012	340.996	452.692	248.65	322.447	316.17	395.883	390.476	337.776	375.838	374.445	469.125	352.694	326.156	405.054	361.701	309.958	267.031	331.721	214.502	254.247	321.348	273.796	347.791	505.289	338.557	289.901	227.339	449.115	339.069	426.372	311.98	225.117	270.07	494.077	316.466	312.771	256.162	164.749	508.137	353.388	360.696	352.214	301.983	610.898
ALKBH3	329.396	483.882	383.604	473.545	510.73	436.868	483.192	327.448	411.938	313.447	348.097	456.165	422.601	443.041	520.312	468.369	373.636	363.497	384.13	373.584	349.735	359.704	305.766	312.24	316.975	398.886	410.673	432.64	330.563	427.989	460.714	453.477	563.212	734.495	742.042	776.107	523.214	421.657	606.877	698.936	817.374	389.823	448.692	618.492	679.395	639.372	586.53	653.214	806.515
ALKBH3-AS1	19.1737	52.7456	9.70075	23.8588	40.4786	57.3542	39.3707	39.1588	24.129	46.1668	45.0883	15.2236	44.5774	16.2033	26.4064	51.1496	100.995	48.8137	35.3013	61.3401	18.6401	24.1478	7.9029	31.9048	35.9689	68.6617	28.4835	70.4856	22.5274	36.1597	73.2947	49.5123	53.7252	40.3473	27.3531	16.7908	73.3916	35.0881	55.9272	21.1075	36.9948	15.7317	33.6138	80.8704	14.4289	30.745	44.3234	4.89765	10.6131
ALKBH4	305.339	298.49	313.383	366.436	318.773	246.578	305.248	317.494	359.836	373.639	385.268	323.942	267.966	291.541	267.792	230.551	243.129	233.325	317.534	341.879	248.964	267.022	312.676	320.471	334.193	296.225	233.328	278.511	298.243	406.288	379.12	340.784	374.393	323.416	361.675	379.01	334.468	271.493	417.638	271.965	362.035	328.948	306.373	402.946	250.536	378.958	266.848	440.222	270.93
ALKBH5	3134.52	3409.9	2952.38	3518.32	2537.96	3210.13	3547.13	3219.81	4032.59	3504.57	3185.5	3392.89	3704.71	2891.02	2787.02	3509.6	3368.98	3271.67	3598.46	3477.89	3328.87	2923.56	2690.59	3326.04	3836.88	3987.03	3918.92	2506.25	3595.71	3119.55	2793	2742.59	5163.78	3892.44	4231.09	4119.57	2921.78	2762.33	3830.9	4799.91	4214.42	3343	3972.61	4769.91	5045.26	3284.93	4415.42	2791.02	3281.49
ALKBH6	966.662	755.864	1131.69	1036.66	969.991	804.531	927.812	746.913	1054.46	835.156	794.068	572.557	705.051	696.459	807.677	871.289	717.611	711.423	712.728	858.794	853.625	759.397	840.957	761.432	911.96	858.51	760.812	1138.41	852.064	818.755	860.659	720.744	1263.91	1023.99	1188.77	966.258	722.568	964.18	971.312	1236.25	966.636	720.435	860.954	961.197	1046.77	890.293	1553.87	1132.95	1058.52
ALKBH7	1744.9	1665.28	1903.09	1797.92	1976.56	1755.24	2048.59	1469.19	1696.77	1162.78	1378.36	2572.54	1561.12	1262.82	1453.47	1267.3	1404.47	1543.52	1374.53	1888.02	1310.56	836.372	1415.97	1260.6	1332.43	1682.94	1625.47	1653.47	1819.01	2143.67	1661.23	1023.9	2657.14	1958.32	2196.38	1945.62	1278.77	2005.81	1959.47	1574.64	1568.65	1615.86	1878.08	1560.79	1404.24	2257.28	1276.77	1704.75	2161.22
ALKBH8	449.684	451.896	520.174	404.222	503.783	454.492	478.703	383.38	512.37	396.478	409.632	430.933	460.769	415.798	463.226	506.104	551.618	411.506	388.873	343.471	396.84	339.971	341.821	289.53	346.818	369.802	345.646	553.136	406.425	426.045	321.757	331.212	466.043	288.658	510.328	380.058	262.982	362.582	359.868	354.195	382.709	299.074	299.583	522.379	413.185	314.593	399.043	343.031	543.341
ALLC	87.6651	178.09	116.101	157.39	101.727	21.0444	4.45747	99.1763	148.568	27.1464	77.3111	161.435	28.8702	106.752	144.177	138.54	161.943	142.799	122.896	132.574	112.416	67.5295	60.0196	29.2337	124.922	41.2145	21.6255	29.7411	92.6917	90.4723	112.759	43.7351	145.308	190.056	142.022	90.1273	114.592	48.9011	86.7729	138.733	75.4781	82.2469	140.925	110.163	102.145	116.67	96.2797	74.1185	102.549
ALMS1	824.499	759.754	836.352	913.717	720.877	755.509	686.134	698.272	672.102	679.174	996.315	583.604	1177.02	902.652	1125.56	932.296	1137.01	1021.27	771.402	942.009	786.77	860.54	492.079	500.168	792.516	633.653	724.108	484.783	564.621	435.529	581.883	336.778	666.77	616.762	753.32	658.763	341.97	823.557	829.627	960.261	1046.17	599.455	882.243	544.387	1078.32	694.585	1074.9	683.041	884.239
ALMS1P	38.3427	80.4917	85.8566	95.9019	43.4123	105.569	85.7004	181.33	141.063	164.513	93.4207	19.9263	145.317	133.395	81.2322	98.5153	105.407	195.168	158.333	117.499	83.5618	15.75	141.566	86.1839	20.882	128.876	81.8447	197.473	145.617	115.247	93.1902	132.168	167.885	62.6866	131.941	67.1536	33.0683	120.653	85.1165	132.386	72.9201	119.381	26.3397	115.225	161.058	7.10692	99.4191	105.877	108.49
ALOX12	623.568	1091.51	899.467	738.63	288.833	636.896	674.108	780.914	900.426	2427.3	409.836	613.835	336.596	599.438	500.309	512.834	593.763	371.671	730.789	944.102	617.792	525.339	2467.32	1286.08	188.491	479.223	328.082	405.983	118.413	361.07	512.91	430.035	620.401	1872.26	138.88	797.601	1224.74	1911.21	949.198	265.754	597.293	1987.49	665.572	782.227	486.317	1061.22	1118.74	657.293	357.547
ALOX12B	16.2104	12.8782	19.3855	9.24187	7.76556	5.05818	5.84601	8.5614	19.2235	7.24228	9.5747	12.1354	5.79335	11.3971	8.9424	16.2215	15.035	25.3989	14.6289	6.41004	20.0568	8.07913	17.6094	5.11698	9.08978	5.62924	4.61261	8.12309	11.0976	9.14181	10.6026	11.2103	7.898	11.3541	25.8582	18.0806	9.88646	8.1839	13.4742	10.4993	10.4956	8.25492	4.70544	6.37471	17.7631	3.63108	16.6991	14.2043	20.9876
ALOX12P2	73.8713	46.205	49.088	33.64	88.7389	115.702	31.2173	28.1548	12.518	23.2222	37.6781	44.8052	65.549	132.274	39.4971	27.9656	42.2429	54.8229	92.4605	42.0609	88.4449	40.9602	77.6349	143.85	81.1127	46.6738	106.784	76.1381	40.0028	32.006	22.91	55.2283	81.9637	102.533	48.1998	18.2168	17.7199	39.6575	121.31	85.9731	128.153	72.4723	116.844	70.1424	153.382	44.5158	134.686	156.923	11.83
ALOX15	5.74918	8.52923	5.53413	5.45019	29.4985	5.66075	14.31	59.2145	6.46399	6.89979	5.72303	7.24351	9.1466	33.0755	6.88198	16.9456	6.69839	4.17209	5.73615	15.1931	78.2923	145.066	4.95894	6.38805	9.4075	40.3053	46.3528	7.49122	62.3773	40.2821	5.47083	8.66754	7.70723	7.59257	4.79296	12.1154	25.0312	13.7855	9.4918	56.802	43.7037	4.20177	6.93085	10.1424	21.056	4.17703	11.2171	14.9522	19.0689
ALOX15B	151.211	14.0401	64.644	128.639	166.005	148.402	123.573	71.8633	195.844	181.932	108.034	21.9086	64.0185	19.3033	167.046	38.2452	140.573	203.868	67.3273	61.4399	205.996	100.647	2585.93	342.554	315.878	604.181	105.708	147.673	95.727	118.4	114.945	238.656	720.09	113.429	109.441	92.1012	183.827	392.581	122.526	48.017	235.231	1446.01	381.991	216.567	77.3607	447.836	574.797	579.117	19.1031
ALOX5	8174.56	7053.5	7176.91	7009.74	6432.23	8410.88	5563.22	9742.16	9468.65	10112.4	10801.8	9924.05	8056.04	8011.73	6510.28	7591.62	7357.01	9589.62	11300.3	6255.51	11048.3	12730.2	18046.7	14479.6	13457.9	9791.75	9042.35	7384.15	9083.75	10077.2	10786.9	11470.9	12940.5	8253.99	8888.86	8597.8	8642.84	8615.95	8460.48	5017.03	8844.12	18389.5	14148	7026.03	5784.02	16323.3	5577.02	10441.2	5424.89
ALOX5AP	7435.34	7552.96	7515.16	6885.68	6345.62	8543.06	5755.66	9598.48	6278.32	9137.04	7193.88	9654.99	5707.94	9765.95	6658.74	5561.19	4690.03	6928.91	6876.84	6638.79	8164.39	18973.9	16106.6	12840	8714.76	12470.9	11114.8	12332	6718.3	7201.53	6241.98	13846.9	10863.3	8377.31	17789.5	11383	12426.3	14017.5	12414.5	6276.25	9107.72	28680.8	11487.1	16673.4	11604	17369.6	8485.31	13648.2	7033.02
ALOXE3	192.019	212.266	227.738	223.452	207.938	174.59	179.686	203.188	265.042	235.317	201.604	231.814	216.161	262.059	290.162	249.398	257.901	250.391	248.216	242.74	312.219	237.444	279.402	244.887	204.102	265.99	147.69	259.537	233.606	181.947	272.916	218.633	251.716	181.85	220.54	183.108	237.876	231.363	286.844	256.505	238.96	243.397	300.072	271.118	245.878	176.697	242.84	262.557	178.339
ALPI	5.05097	8.03968	13.8859	3.52471	5.17591	7.62841	13.8323	5.17294	8.94595	9.03527	8.21501	5.97824	11.999	5.76714	5.39822	8.24345	12.842	8.57501	11.1575	26.086	8.69728	4.38309	6.48931	7.10731	10.9634	7.26228	6.01015	11.2533	10.1359	15.2962	10.232	11.3919	71.9081	10.1832	10.1993	7.89164	3.69428	15.055	11.9649	119.924	10.0787	18.5299	10.4597	12.6162	25.1921	19.7143	11.7626	14.7208	18.8812
ALPK1	221.946	263.589	241.745	181.351	208.078	366.77	174.401	457.556	212.452	108.784	185.882	164.343	224.867	252.664	304.608	593.883	283.937	120.677	267.054	107.705	546.115	1955.94	502.543	772.906	502.343	628.53	344.222	444.59	229.546	469.647	533.2	1179.52	540.145	460.042	591.801	387.048	769.459	838.39	659.361	310.519	397.485	697.974	618.044	401.081	332.129	433.853	410.114	552.108	312.986
ALPK3	33.9105	14.0352	63.9782	14.8584	52.057	72.1852	47.0889	17.3501	31.9768	83.2639	47.3303	72.1698	82.9134	66.6332	45.2274	72.3167	54.1463	53.0531	90.4961	51.227	58.3378	22.7128	56.9148	68.2815	22.2463	8.72611	70.662	47.7013	70.2812	19.4736	63.3121	24.847	80.1801	15.9943	16.192	34.7652	52.0141	73.6032	63.6713	25.2489	85.3291	11.2373	67.2065	74.7738	103.931	44.5564	68.7875	8.05779	40.438
ALPL	83.8713	98.3907	59.1988	119.538	52.8276	88.956	78.2869	433.288	96.2216	103.604	103.513	50.7993	123.263	183.381	126.119	201.556	126.842	142.466	170.151	119.877	757.969	1445.25	403.923	873.704	178.001	476.579	332.145	173.894	63.6619	383.524	184	926.64	2301.35	387.516	303.962	207.892	359.276	1083.11	298.95	32.2392	83.2744	121.078	633.943	191.525	98.1789	150.615	299.97	757.553	139.108
ALPP	5.63815	6.55985	5.30216	4.35698	6.10282	4.8067	3.72935	5.45297	5.59238	6.38707	7.35172	6.59219	7.83955	6.38468	9.51011	6.07424	9.0535	8.72525	8.69628	6.57156	6.84284	4.34182	9.84339	4.99274	5.55191	5.7935	9.42354	8.25792	5.86203	5.52701	6.4979	6.32135	7.48056	6.16693	6.91145	6.20549	6.8585	6.37121	7.53365	8.61296	8.8639	8.28867	6.69702	7.71112	5.23949	6.43354	6.78849	16.433	8.02209
ALPPL2	147.968	290.657	134.722	172.665	153.4	199.217	144.266	153.745	207.787	228.016	263.397	214.689	268.084	220.756	297.783	229.899	209.788	292.114	235.173	214.959	239.073	200.172	193.98	179.684	178.078	138.44	280.57	137.208	226.36	262.638	200.809	202.321	230.324	191.04	185.559	112.66	127.075	174.653	249.677	122.259	226.812	220.234	36.3673	244.084	88.8534	223.305	235.939	231.662	148.548
ALS2	511.451	466.941	380.793	446.083	422.515	389.571	452.652	414.307	472.326	438.92	491.109	359.879	481.794	448.985	481.993	541.065	457.527	594.857	465.967	454.249	597.956	450.291	467.958	456.695	395.282	400.657	274.848	247.548	291.354	341.007	412.085	443.778	435.436	354.656	529.106	421.045	365.751	488.231	419.776	458.962	505.966	408.039	543.75	440.861	556.466	514.244	526.391	570.842	413.107
ALS2CL	371.082	271.114	525.838	649.222	498.327	372.318	573.518	397.462	437.27	418.971	372.496	275.98	499.575	537.641	448.028	490.004	569.401	631.815	538.948	470.45	497.661	422.999	247.148	303.159	348.506	401.358	598.165	365.585	494.188	403.36	478.829	273.024	265.784	607.426	440.727	273.28	405.994	422.168	503.911	580.408	454.092	278.779	391.837	438.554	410.509	326.421	370.438	300.407	649.913
ALS2CR11	20.1913	25.1081	79.1514	69.3016	89.4266	36.0855	18.685	3.3743	72.9407	35.6867	1.38273	28.2785	43.1267	48.3246	58.9333	45.1318	55.3515	45.9816	69.2453	7.2337	4.15991	49.4394	37.1695	43.7666	4.86652	68.4636	36.5563	69.5893	44.1929	40.4149	48.9913	33.1736	68.3937	61.5425	78.3955	53.8825	55.7609	105.045	46.805	8.16083	43.1585	90.466	55.6906	4.34465	90.5076	6.53125	15.4276	30.0369	24.8676
ALS2CR12	68.0358	25.5022	144.013	143.585	90.1922	113.178	111.75	67.3887	169.921	65.7887	151.049	67.2912	241.407	106.675	172.151	182.364	223.632	156.254	48.9857	174.185	27.8669	121.372	92.0869	173.987	38.1583	21.8409	168.684	44.513	90.0624	50.2948	48.1313	19.7805	167.302	221.659	165.073	170.408	40.0315	34.9736	92.6001	164.137	58.4708	127.258	140.928	180.62	37.2636	168.477	20.4986	10.0418	187.707
ALX1	13.6211	83.1801	10.3472	21.8819	7.75643	44.4729	7.6957	31.5525	15.9283	24.0755	21.3404	18.0137	11.4399	16.1896	24.0075	18.6886	34.0996	18.2029	19.8389	22.6833	11.1509	16.3422	10.1171	13.2629	17.8892	14.1183	11.9521	22.2483	15.7219	9.18532	15.9475	16.9412	11.464	19.9458	5.2869	14.3168	14.0276	9.68213	10.2297	20.2827	29.1021	17.2705	18.033	24.6615	13.8572	15.6617	31.8365	20.2175	30.984
ALX3	72.8776	70.502	59.1214	55.3237	81.8697	18.7982	77.1655	38.4839	76.6523	51.9862	5.80572	14.589	45.6275	6.57392	50.984	32.8699	36.9099	52.8983	73.1282	38.5136	70.9066	50.0026	14.7705	143.525	100.463	75.5031	8.17733	157.808	113.813	77.4564	23.2554	67.6467	84.6371	23.8526	6.72862	37.2657	25.8175	113.78	40.4982	84.8423	8.7995	23.6686	21.8789	10.278	7.50007	21.3783	77.8109	100.477	18.3913
ALX4	82.2349	23.8058	19.2976	30.8162	66.5505	59.0003	58.2752	76.6085	71.8989	80.2477	52.8838	103.86	75.9544	77.0606	22.7988	59.7886	50.3371	15.2767	84.4662	22.0597	120.507	114.867	32.7737	109.573	125.922	29.7882	25.1326	115.404	60.4072	54.9776	95.8455	25.2984	90.408	7.59489	28.8387	45.4927	19.8981	19.7419	77.3336	21.7501	61.0147	69.863	65.2066	61.5675	39.7362	13.4635	26.6539	31.6581	138.042
ALYREF	918.972	1177.26	971.473	1048.65	1140.49	1146.33	939.064	994.377	1242.31	1609.7	1281.29	2366.71	1157.91	988.963	1242.12	1283.26	1164.16	1800.25	1138.61	1111.49	1046	929.057	1153.09	1039.34	1160.7	1129.83	2294.47	1997.73	1540.28	1228.23	1653.14	1374.43	1559.59	1634.64	1429.65	1475.85	867.477	1268.33	1741.38	1728.49	1889.41	1260.31	1838.46	1526.09	1458.15	1511.53	2270.04	1130.48	1107.97
AMACR	18.6132	12.8665	90.5289	41.137	42.7029	104.521	88.6107	9.13235	19.6503	118.013	56.4631	21.8019	16.8937	63.2076	24.1801	27.6898	13.8465	229.993	14.7252	28.3886	123.444	36.6064	157.447	69.8422	72.1601	31.995	97.7234	57.0648	93.2578	58.0582	139.167	63.2576	107.368	29.1393	108.516	69.8784	43.62	113.619	139.339	51.2824	48.2272	51.4709	27.2638	73.0636	30.3778	73.2036	14.8074	9.26513	121.011
AMBN	85.7131	43.8499	29.6904	72.3467	77.7622	17.7406	64.9075	71.0745	21.8327	87.8336	85.8252	48.9736	32.4531	60.4144	31.1058	107.68	19.2384	9.78435	35.4442	30.9833	76.0569	44.7825	69.8735	63.4241	110.665	29.7289	163.112	49.8413	41.2941	27.3214	29.8806	27.2684	24.5269	100.243	25.9823	88.8636	31.9851	34.8521	73.0333	50.3812	32.5581	29.7949	32.2949	48.5707	28.0424	29.9425	24.6985	87.824	30.8769
AMBP	117.408	145.444	121.895	84.1396	112.346	171.488	101.721	117.691	158.269	116.376	184.745	71.7248	118.04	91.9284	94.7001	97.011	62.7542	138.9	94.6313	127.623	112.775	102.908	141.564	103.644	71.8205	154.811	112.457	204.245	47.3026	100.294	112.739	92.6953	96.4365	13.9711	97.9225	115.219	18.7372	120.678	99.648	87.437	99.9762	143.087	110.558	121.78	118.97	124.782	60.8276	77.6585	118.662
AMBRA1	696.345	579.113	535.996	659.613	583.697	547.016	664.466	677.1	593.322	574.594	502.332	776.462	535.4	488.567	666.114	593.399	543.358	297.579	683.378	444.745	507.779	553.143	636.352	435.005	744.126	540.455	502.637	746.111	775.443	816.462	680.661	570.347	666.539	835.74	1011.82	916.877	687.346	519.816	1148.68	953.153	751.259	686.136	725.105	896.321	808.098	973.586	656.669	944.298	1506
AMD1	2355.85	2887.12	2932.42	2696.24	2682.98	2935.21	2708.26	3045.78	3088.44	3233.27	2941.05	3212.44	2879.65	2703.98	2497.84	2565.35	2810.03	2889.37	3050.06	2993.29	2759.75	3769.18	2761.69	3384.75	2330.05	2351.86	3222.93	2546.79	3147.11	3209.57	2981.41	3454.64	2231.78	2112.68	2508.9	2224.42	2467.89	2918.5	2770.61	1812.62	2063.14	2944.25	2230.27	1902.95	2037.61	2264.15	1932.58	1327.16	1890.41
AMDHD1	108.857	47.4677	117.186	194.033	170.693	158.57	94.0082	94.824	72.046	64.2878	101.268	210.085	126.491	165.052	150.66	86.6128	77.6212	195.664	109.401	144.565	100.588	150.681	39.6013	100.02	34.2859	185.805	168.301	134.111	103.208	125.273	150.644	148.089	116.218	57.1989	124.028	103.052	109.095	135.977	59.6295	181.443	41.988	96.7102	133.942	145.667	149.727	209.085	83.2534	197.473	156.937
AMELX	48.0677	87.2316	107.109	49.902	77.6315	82.3411	80.1105	72.3146	47.7141	168.378	121.907	70.5776	58.0945	85.3629	104.119	121.423	117.299	82.8528	59.9771	93.6145	113.635	116.281	76.367	47.9169	138.961	102.893	124.161	118.902	52.8329	42.875	93.0859	85.4986	92.5276	17.2002	45.3554	28.5731	153.825	73.9763	78.717	80.1211	78.5971	59.8335	73.3411	59.3887	47.5281	68.3612	80.4422	143.563	115.885
AMELY	98.8536	133.946	9.86349	58.2785	13.051	10.8135	11.4155	69.1413	9.78064	12.7167	12.2502	12.5338	102.758	17.1636	20.6937	97.9465	38.3898	104.031	120.433	49.3322	17.2428	40.9265	86.3933	13.2747	70.3503	26.2224	95.0177	21.7074	47.0211	12.5312	49.7801	16.3383	46.4544	26.0046	63.8948	75.3307	116.153	104.489	121.994	17.9771	118.87	56.7712	76.898	38.1941	14.5305	9.8789	127.437	160.008	26.1462
AMER1	132.443	95.2552	152.053	66.09	105.957	124.115	93.9773	86.5692	59.3165	138.126	171.074	202.766	213.912	139.822	152.63	84.6737	181.57	252.396	224.558	82.8927	132.73	99.5717	85.2057	43.7103	127.125	62.2721	203.182	142.071	110.241	65.8674	117.122	129.461	80.2847	82.2603	72.944	88.4712	96.2731	140.849	33.4122	98.9967	62.0991	85.7314	90.4397	18.0746	87.3121	110.794	28.6334	31.634	14.6733
AMER2	26.8261	141.971	13.7952	54.9625	91.5635	20.7855	16.9221	31.5483	80.4142	12.8117	19.0599	31.6011	19.2672	35.9846	157.065	17.2813	48.9298	18.0263	26.6363	35.5316	16.0932	19.7285	18.8895	9.13314	21.1875	12.7711	18.8803	108.251	117.41	80.6897	36.6179	60.9241	17.3782	74.9941	200.064	18.507	116.053	97.7245	32.0757	25.5647	22.4256	27.6411	118.337	109.61	17.9795	88.0952	34.2905	23.3967	29.4064
AMER3	59.4741	147.589	113.011	38.228	33.1566	10.8619	41.5318	67.8314	75.3133	52.1884	74.6524	55.5932	47.3048	25.4506	43.495	31.5639	49.7929	52.0848	81.0359	70.7322	36.0233	30.2812	60.5699	42.9587	33.7383	79.1043	37.775	87.1049	34.6281	14.0798	46.2811	95.305	65.2452	86.3252	40.8914	25.5149	97.1518	103.194	32.931	31.4279	34.0938	20.1765	31.8979	78.8679	69.3974	12.3392	12.8992	19.6056	11.8751
AMFR	1240.74	188.2	915.927	646.781	270.456	346.995	902.535	224.555	396.977	2145.8	647.731	631.236	169.636	400.434	1543.36	1593.55	1909.27	228.214	1320.81	570.792	955.275	359.064	1574.33	1897.76	612.084	2853.35	2058.53	1594.68	495.226	646.95	962.906	936.096	1570.71	680.258	192.777	1271.42	1010.24	1310.26	846.179	1182.45	747.985	577.12	290.724	1071.87	345.88	195.031	627.699	433.004	1103.14
AMH /// MIR4321	6.96039	63.8922	6.05028	11.4638	38.5141	23.1234	10.23	13.6475	12.2406	25.193	7.32289	20.4007	6.13791	6.31631	33.4426	9.726	48.5174	35.8186	25.1917	48.6214	10.9277	3.65716	8.22811	8.33418	14.3807	25.7454	27.3452	66.8347	39.4855	71.1688	39.7129	6.67827	19.14	26.0035	35.0039	13.8881	28.5521	20.5271	47.6926	34.7196	8.05302	12.336	12.1163	13.5451	4.39539	18.1023	53.7835	84.8511	81.9936
AMHR2	17.4811	29.0523	31.4744	12.0893	20.0042	35.0746	21.4629	20.9719	20.676	18.0514	45.8718	24.3927	17.2121	24.345	26.3135	46.274	20.0318	102.627	32.0922	35.2528	24.7501	33.4154	13.5535	12.3704	8.82077	13.9913	24.9044	40.5034	45.387	26.8285	63.7893	27.9259	14.7687	10.6066	27.121	11.2225	19.6714	14.268	13.7079	91.7476	11.7904	18.8038	34.7157	41.6323	17.2045	17.6375	23.0508	27.4319	40.6845
AMICA1	5061.17	4309.49	3540.15	4542.61	4347.98	5899.41	3862.96	5589.18	4598.23	5907.61	5374	3986.03	3385.73	3962.02	3669.91	3920.7	3962.79	4242.03	5739.39	3054.44	7408.84	9092.29	5088.01	5110.75	4706.2	4311.31	5138.13	3322.43	5360.1	7572.36	6209.92	6061.64	9946.65	6516.82	9878.34	8515.34	5622.05	4048.22	9629.99	3267.5	4122.46	4096.16	8941.14	3744.61	5780.08	9726.86	5509.52	6946.54	4679.62
AMIGO1	338.595	391.316	526.49	477.975	424.286	337.538	549.455	272.326	438.894	255.589	240.112	251.378	393.378	290.922	327.338	438.317	413.292	307.737	356.231	474.028	206.774	217.515	120.433	156.578	109.227	263.369	306.766	318.261	387.566	431.695	284.124	161.038	166.569	284.372	480.226	525.497	306.274	237.218	507.76	442.929	209.956	109.526	312.123	371.631	284.774	282.403	307.035	192.266	672.091
AMIGO2	1193.8	1177.07	1991.77	1506.58	1407.72	1193.49	1935.08	1280.81	1604.65	1091.23	934.513	1054.63	1468.97	1104.39	1392.99	1295.04	1066.99	1183.16	1281.96	1895.96	1081.52	1106.41	719.276	889.823	854.46	1248.68	941.525	1317.99	1604.75	1379.23	1222.87	916.738	528.732	800.206	1020.67	666.629	908.489	1025.4	851.902	1341.18	708.141	645.179	616.885	1184.22	1049.7	731.218	645.924	457.035	1572.42
AMMECR1	1047.67	807.89	917.025	960.769	902.743	989.225	1069.67	963.488	917.884	588.026	971.781	673.59	1089.15	996.769	985.367	1211.25	929.733	1134.65	1078.61	965.716	799.767	895.716	669.159	646.691	979.956	691.003	1017.78	744.079	691.88	679.78	902.581	567.383	422.492	600.501	571.057	527.042	795.169	823.62	550.677	746.599	576.459	575.111	553.002	616.816	902.688	323.672	758.913	523.999	878.953
AMMECR1L	848.069	738.51	657.171	782.804	820.995	817.933	899.772	949.13	677.772	549.162	801.237	645.296	726.462	796.378	732.492	945.126	806.95	492.457	740.307	819.955	699.504	599.442	513.475	731.729	624.551	811.279	533.737	675.028	887.761	767.423	851.759	595.253	664.765	441.952	955.156	794.613	642.879	520.17	582.327	806.897	764.065	715.717	496.628	910.992	769.029	673.708	638.765	783.96	814.88
AMN	214.086	186.482	145.209	110.18	113.892	194.834	267.076	238.355	258.321	119.891	263.419	280.156	197.428	225.991	197.258	224.565	298.786	352.262	206.025	79.7789	238.979	87.5919	172.523	202.441	310.849	72.6324	156.349	315.922	224.341	138.281	164.245	191.212	69.7336	192.781	252.04	120.445	198.694	235.193	179.342	330.473	249.63	164.831	132.18	311.147	162.53	206.963	166.163	219.54	127.531
AMOT	76.7856	9.9791	10.6582	55.4392	82.1237	78.082	39.9327	64.9922	23.587	6.97683	9.88356	46.1926	62.7822	137.155	122.635	24.9018	37.0885	66.1894	131.842	37.4184	6.73314	46.8295	58.3611	18.3474	50.2977	79.5462	79.1836	93.773	74.081	83.9075	55.725	5.07287	63.8591	115.936	110.623	83.8395	22.4089	45.8809	41.8737	11.9127	52.6667	61.1446	68.0165	15.4796	19.1708	149.527	70.3129	32.8533	38.3253
AMOTL1	103.953	127.2	38.617	49.4784	71.6897	52.5064	57.0702	80.1242	66.1491	91.3675	140.944	88.2492	22.2498	53.7754	101.291	20.5629	102.129	94.5279	46.7749	129.262	98.8242	25.3845	112.041	308.495	69.6075	129.763	86.9667	79.1292	144.56	125.4	136.779	126.481	134.239	25.6666	78.6329	117.957	72.3828	61.8024	166.648	16.3278	87.5022	245.967	71.642	91.0984	34.755	97.3683	21.0232	155.058	112.773
AMOTL2	22.2365	15.0362	10.0089	72.778	65.0871	12.449	8.43351	45.3098	41.6386	31.0247	14.4734	54.1566	19.557	12.219	77.6511	81.1741	14.0329	68.499	100.157	77.8672	9.19702	65.4029	80.7626	67.7666	75.2365	12.6822	60.4467	11.7607	10.1209	7.15752	29.1372	41.8254	22.1887	11.8233	9.617	10.083	8.10343	14.7413	54.6057	95.294	14.1551	112.616	53.863	31.1363	74.3398	12.2944	27.2588	10.5391	3.96859
AMPD1	11.7457	70.0018	33.5321	80.1771	20.0165	18.1991	39.1811	63.3465	7.2709	45.3836	44.9882	49.7049	86.9294	35.3535	45.4738	56.0508	56.4379	110.472	84.8952	51.8252	96.5281	10.7741	68.5638	6.05048	24.341	65.024	84.175	80.1133	23.5444	39.9137	58.5998	47.9361	8.33148	7.40862	4.78891	12.8525	3.13635	50.1128	76.5086	89.9405	113.842	41.1502	64.9306	51.9845	62.48	45.4751	41.5689	9.21413	61.1007
AMPD2	3397.54	3043.21	2421.63	2638.5	2468.32	2533.06	2471.47	3942.21	2892.27	3461.51	3575.88	2138.21	2447.48	2522.24	2540.37	2888.13	3219.36	2917.4	4425.2	2470.82	5205.75	4699.89	3605.51	2864.86	3511.61	2638.51	5258.34	2364.49	3323.12	3796.26	3858.54	3025.06	2430.67	3590.02	2096.81	2076.6	2266.3	3270.8	3162.38	1855.89	1822.82	1849.71	2359.62	1114.67	1932.55	2134.69	1900.89	1766.65	2031.2
AMPD3	952.873	836.383	1007.69	880.875	835.519	1021.39	1079.93	787.067	952.58	739.934	1027.32	978.801	921.554	959.841	901.205	970.595	910.171	691.401	1069.29	818.797	855.564	891.444	670.481	1263.03	1443.38	933.642	753.518	703.193	1057.46	1143.48	1240.71	1065.85	1579.39	825.765	1127.79	899.713	944.597	731.654	1039.83	772.454	983.706	1719.29	1217.35	1991.05	1356.76	1056.93	1433.47	1274.92	1162.25
AMPH	92.3087	141.748	112.599	71.9764	85.0363	60.2477	96.1174	128.4	111.915	134.178	108.456	150.689	38.3629	39.463	92.2877	156.855	95.2436	128.207	77.3051	40.641	120.925	75.1225	983.281	420.179	78.3902	1081.11	122.58	227.695	116.583	96.8721	91.4042	136.236	649.162	90.8116	40.5071	92.3783	101.297	447.54	98.717	79.5511	68.8229	1650.85	311.933	34.965	158.238	565.675	362.309	957.149	55.0841
AMT	741.062	474.596	914.685	777.16	885.607	672.829	671.69	558.971	766.11	641.178	752.86	586.738	819.587	833.088	1093.04	774.648	850.016	967.92	865.37	975.731	667.404	615.408	905.995	561.764	911.024	810.172	743.343	590.368	668.454	691.987	532.734	505.58	662.248	702.484	661.131	503.706	497.973	670.292	682.509	829.8	456.98	649.772	717.818	645.724	708.792	666.451	853.749	668.311	754.556
AMZ1	379.812	320.557	267.1	329.344	342.514	279.575	323.63	222.502	248.592	419.191	311.566	326.031	271.81	388.251	355.466	246.957	318.546	342.742	394.047	329.444	346.013	251.667	370.449	392.759	340.955	421.115	349.616	401.716	331.053	559.241	343.17	437.857	603.019	408.523	366.04	347.46	323.309	328.073	301.598	589.083	387.091	502.63	446.175	475.668	274.035	323.627	377.407	494.995	450.732
AMZ2	3600.1	3279.67	3340.66	3251.25	4022.62	3177.55	3154.9	3401.79	3270.87	2729.6	2956.3	4046.25	3914.67	3678.47	3346.95	3207.55	2790.98	3622.39	3455.13	3901.79	2609.28	2745.43	2062.54	2399.33	3214.59	2755.06	4220.41	3545.37	3248.67	3035.3	2991.45	2602.93	2410.2	2294	2459.96	2366.5	2440.44	3562.54	2657.06	2938.47	2710.4	2077.42	2343.42	2467.4	3218.68	2099.32	3399.5	2118.93	2657.25
AMZ2P1	449.575	744.998	532.544	527.09	546.883	498.831	593.612	670.35	445.724	528.297	599.136	888.077	480.747	459.767	523.439	476.058	584.674	657.184	517.842	1156.14	490.938	598.545	421.641	347.918	416.732	395.872	836.702	600.74	500.672	539.566	666.869	426.882	445.53	417.933	432.768	582.773	360.628	606.395	513.172	442.289	328.885	305.212	487.796	415.152	579.086	460.535	561.91	526.746	425.426
ANAPC10	669.566	679.222	754.353	559.003	683.626	673.215	709.351	483.641	468.333	354.011	553.982	734.193	802.309	466.838	605.227	580.024	534.001	579.384	514.372	726.445	438.257	377.034	540.43	523.51	500.588	440.043	462.23	799.256	724.818	594.083	618.4	536.442	556.455	582.721	513.636	587.133	704.954	659.101	604.421	685.751	564.887	596.843	486.085	582.953	611.07	670.947	496.932	426.981	528.946
ANAPC11	2234.83	2101.45	1930.38	1962.93	1939.1	2226.94	2117.84	1938.63	1808.33	2371.32	2125.34	2973.88	1838.55	1998.29	2124.69	1848.12	2141.4	2135.05	2046.29	2325.27	2254.25	1580.14	2740.73	2840.19	2691.17	2505.32	1984.33	2920.99	2934.4	2917.8	2973.22	2851.38	3063.41	2355.56	1987.59	2936.4	2516.06	2370.07	2062.92	1908.36	2744.37	2678.02	2688.15	2413.84	2192.5	3234.11	2910.18	2320.35	2174.67
ANAPC13	2500.12	3011.59	3063.35	2973.27	3175.42	3662.32	3932.12	2991.99	3191.86	2955.36	3833.79	3817.55	2984.76	3461.62	3690.57	3066.78	3372.03	3825.93	3518.04	3346.54	3751.06	4034.66	4037.68	3740.26	3371.95	3583.37	4043.21	3941.4	4159.98	3092.46	3416.34	3957.79	5356.78	4990.24	4019.17	4900.1	4686.45	3244.4	4802.06	3973.95	4304.6	3704.49	5624.87	5772.41	3664.32	3823.53	3686.87	4296.96	4087.85
ANAPC15	973.007	992.987	856.334	814.36	905.472	969.508	987.518	780.363	748.228	1033.37	670.23	1270.42	903.175	664.454	696.746	812.219	724.346	847.63	1114.65	789.198	934.295	758.604	1262.14	1478.51	1182.95	1000.58	974.862	1110.88	954.169	1083.35	831.716	1150.71	1592.5	1473.41	1665.51	2061.97	1014.87	1145.63	1382.62	1327.84	1587.05	2087.48	1759.62	1579.48	1996.15	2048.23	1943.76	1674.64	1293.87
ANAPC16	6218.87	6720.74	6847.38	5747.33	6989.19	6682.85	6920.04	4427.18	5690.62	4742.33	6577.8	8028.72	5897.47	5012.82	6276.11	5674.54	5579.08	7694.91	6075.69	6624.41	5109.6	4823.09	7179.81	4425.32	6983.58	6651.76	6737	6384.39	7296.54	7200.43	5513.17	5794.96	6706.77	5788.5	7010.18	5020.5	5557.47	6940.2	6511.74	6031.14	5732.7	6976.2	6177.93	7698.48	5319.19	6881.63	4224.82	6138.99	6934.99
ANAPC2	1107.33	847.787	1077.05	1072.52	969.223	829.732	979.736	678.65	888.293	799.662	661.377	529.964	880.463	652.692	779.661	908.766	675.988	632.03	1024.5	939.062	904.545	801.259	1039.44	953.987	1038.7	1048.42	719.933	785.343	790.525	628.179	760.074	644.294	848.816	674.222	669.462	913.219	558.74	680.175	923.681	735.656	759.03	679.751	827.015	808.528	619.619	702.615	1173.03	992.851	789.561
ANAPC4	2133	1765.89	2222.82	2263.61	2149.72	1975.94	2349.64	1852.58	1966.89	1875.75	2113.67	1617.13	2248.49	2016.51	1795.85	2098.48	2060.09	1966.03	2040.46	1908.14	1891.56	1623.24	1857.64	1469.13	1754.73	1802.21	1894.2	1603.31	2078.78	1650.19	1972.54	1525.85	1737.19	1759.26	2279.6	1965.68	1191.67	1608.72	1776.74	2247.26	2064.72	1836.02	1496.16	1985.72	1725.49	1494.86	2065.4	1289.92	2721.63
ANAPC5	6381.09	5259.63	6176.72	5186.15	5687.54	5385.53	5936.54	4972.88	5136.3	5100.55	4937.15	5446.76	5106.63	3709.83	3703.2	4320.65	4442.89	5135.84	5189.61	5249.93	5008.74	4133.83	5621.63	4104.08	5460.08	5357.08	4973.91	5608.08	5315.92	4803.15	5083.15	3594.74	5861.58	6161.86	4819.95	6103.09	4304.52	5706.25	4882.05	5931.58	6007.26	5292.38	6191.79	6802.68	5463.28	6272.77	5958.09	5173.17	7084.16
ANAPC7	666.126	550.848	774.138	742.733	794.635	698.795	703.038	705.97	643.944	594.553	797.531	721.914	732.393	626.943	756.616	575.109	580.162	698.645	851.099	783.804	765.508	577.221	702.441	740.903	744.12	775.376	505.937	1082.78	669.428	625.716	545.122	773.091	982.655	1096.16	1095.76	1147.19	621.445	612.447	1150.17	1237.14	1038.36	1004.57	936.462	1064.22	843.368	984.662	1195.11	998.421	1452.13
ANG	323.79	233.092	158.587	242.125	131.38	241.35	140.465	176.08	174.664	258.48	28.7827	282.531	220.985	151.515	143.093	118.195	97.0426	117.179	209.234	130.591	209.327	35.8087	363.381	470.279	215.948	591.782	166.013	279.657	170.47	298.323	297.198	243.268	1001.24	249.205	161.979	405.915	205.197	340.659	282.22	325.535	350.568	750.071	577.432	168.697	305.918	591.828	708.928	1228.36	116.662
ANGEL1	665.272	668.686	500.747	601.243	511.883	505.978	556.998	464.683	682.939	532.78	591.434	554.609	573.03	363.254	549.802	614.54	633.108	548.925	530.81	544.322	352.198	351.054	520.906	407.776	548.132	443.601	478.749	425.302	468.512	646.993	654.328	357.897	444.297	408.651	529.162	445.319	390.168	516.648	366.964	377.091	364.415	275.419	301.272	344.608	479.488	364.845	527.181	461.423	649.71
ANGEL2	1795.41	1511.79	2077.96	1953.69	1851.15	1731.74	1574.86	1615.37	1683.78	1478.84	1722.97	1197.38	1997.74	1958.42	2038.4	1836.7	1839.51	1700.29	1901.26	1920.75	1702.57	1448.41	1545.89	1559.51	1582.2	1712.45	1486.39	1511.53	1840.53	1695.91	1475.18	1238.6	837.659	669.753	1119.35	1014.53	1242.15	1075.84	977.942	1115.02	1156.67	963.766	978.454	1178.99	1192.74	1073.84	1128.5	926.761	1637.03
ANGPT1	167.437	202.346	234.647	172.399	200.375	182.928	171.373	256.208	244.457	244.184	149.706	178.352	137.445	157.723	130.095	76.2776	189.493	235.779	195.271	166.67	195.24	411.505	214.092	208.814	169.667	156.709	140.469	131.932	230.513	141.082	204.076	280.205	100.473	166.147	107.803	103.61	130.568	178.898	196.203	48.8745	124.127	240.495	138.089	67.1752	86.2738	118.052	89.636	122.075	35.0389
ANGPT2	23.6273	37.0771	34.907	10.9387	9.73807	37.4163	23.4302	11.5796	29.6585	21.8797	7.53901	7.93549	8.56848	9.72267	6.80212	25.7616	45.7366	64.5567	5.96529	10.2136	7.26132	16.1598	14.6526	9.77123	10.3457	12.6743	71.7734	110.867	11.6756	14.1756	43.9341	36.9305	84.5943	18.8225	107.671	179.281	42.3865	68.4445	118.847	177.838	67.1258	68.897	10.8662	6.72064	135.427	85.2638	92.6616	73.6471	106.413
ANGPT4	94.2108	165.74	121.61	98.4693	86.487	82.4032	107.079	88.5197	160.789	32.5623	86.6975	72.3555	103.368	171.97	92.7653	141.13	171.883	74.7909	157.854	174.028	166.677	163.27	201.867	60.9086	28.8159	81.6118	26.593	144.602	150.977	194.028	189.101	137.082	118.088	78.8267	28.7698	127.956	104.771	102.773	87.7137	216.595	77.16	128.89	151.903	188.352	50.6222	172.875	211.957	69.5428	81.8137
ANGPTL1	4.9839	12.1262	26.0177	23.9573	4.44355	5.2915	4.88052	2.46785	1.61086	31.4233	6.22951	2.20856	40.0177	11.7799	8.90156	16.9398	4.94446	6.90496	7.07732	8.65704	14.9686	6.06198	6.65384	6.96135	7.56343	2.27286	5.96145	7.86695	11.0098	9.70048	4.00919	7.81012	8.14828	33.0067	6.01139	20.4282	14.2801	8.37706	35.3325	26.7144	6.96646	0.770698	6.77664	34.8158	30.6291	52.9658	22.6759	1.21071	3.87193
ANGPTL2	119.743	144.754	112.293	108.773	102.569	41.5259	83.1887	67.4036	88.4996	45.5141	132.82	148.027	134.762	171.037	220.523	220.974	142.437	93.8163	229.085	157.278	156.947	95.5015	45.2524	76.028	75.8973	120.094	104.613	188.778	181.525	120.312	102.026	122.546	174.465	165.161	149.078	93.4041	156.364	125.093	195.421	135.262	216.226	100.666	152.033	106.027	133.866	154.006	187.481	181.804	109.491
ANGPTL3	11.0878	51.3578	7.44447	22.1722	4.39877	5.51636	6.47063	5.63022	7.24493	5.94079	3.97539	39.2453	28.9858	6.30052	77.8464	55.7519	53.6207	6.63537	9.04844	8.46482	7.70515	7.76634	46.3784	38.9233	23.6742	6.87486	59.6313	8.88375	6.38124	19.9768	2.91778	5.73867	3.60045	63.1862	29.3138	48.5902	5.83602	55.3342	29.8711	66.0945	20.2948	4.58312	4.76016	39.8685	8.24767	46.1707	8.80157	36.7126	10.4772
ANGPTL4	18.3591	15.1681	30.1647	18.7729	18.026	16.2931	17.0094	13.3739	13.8818	7.3924	43.143	19.0003	20.7904	22.6939	28.6752	22.0837	15.0688	33.9472	13.7518	19.2486	28.2542	58.9251	75.4985	50.4419	20.7297	17.3639	10.2836	20.2186	16.0535	19.6687	15.1726	8.47423	12.0726	40.9233	21.3744	14.4938	18.8203	62.5049	11.3298	49.2194	15.1327	25.3864	38.0038	13.171	16.4258	19.245	14.438	69.0574	8.56286
ANGPTL6	33.6374	37.3986	171.451	34.5891	69.086	34.7171	42.6084	23.1936	44.099	48.1834	93.3997	36.3894	36.9989	39.5752	39.6699	13.2071	18.5985	47.4329	85.5702	38.3097	155.635	75.7113	13.4727	32.1595	67.3505	122.739	25.3666	39.4568	162.91	82.544	16.1579	72.2072	44.6849	21.3777	116.657	37.0255	24.8183	33.8899	20.9405	158.753	99.3968	41.7968	70.414	41.7538	151.558	17.6163	36.7	23.5392	39.0836
ANGPTL7	9.57273	19.6678	5.83977	19.7657	58.976	6.11751	41.841	48.9328	18.9052	28.5551	7.53876	47.876	45.1004	11.4221	57.6414	75.2198	17.3086	25.9127	96.0943	15.5835	41.5187	13.2102	21.6037	4.01735	25.817	18.4223	20.1521	24.6431	26.0689	15.6906	37.8111	51.1435	20.8732	14.3889	17.74	38.3999	9.24045	90.9176	12.5464	74.5047	6.82339	10.5199	48.1322	66.0001	8.13619	14.3859	11.0924	36.6636	12.859
ANHX	307.557	385.511	427.339	583.576	430.434	286.554	454.624	204.769	497.865	508.115	553.369	843.061	531.709	628.573	442.992	552.343	607.362	669.253	503.555	701.927	562.904	485.438	772.755	546.633	526.661	676.443	685.026	368.474	611.773	480.528	465.536	548.527	304.273	561.51	567.724	292.624	490.739	412.447	373.843	80.1298	541.107	472.508	605.994	158.955	539.668	536.381	72.0344	361.838	564.486
ANK1	208.212	164.338	213.07	129.274	125.611	170.478	163.356	168.808	161.627	257.43	101.072	10.8882	157.239	156.267	122.486	222.632	385.202	150.526	171.355	279.981	112.316	141.764	263.83	366.857	123.724	199.251	67.9409	162.58	141.409	217.552	138.147	135.181	180.121	151.365	310.618	175.535	482.852	295.619	131.933	201.11	256.291	204.192	141.948	328.67	145.128	233.901	226.923	731.156	575.638
ANK2	20.6184	47.1228	11.8787	10.7607	4.75687	17.7144	13.8292	84.2631	38.4703	65.9521	23.9518	51.8305	10.5328	60.6273	17.6058	22.567	17.0373	14.4634	31.2778	42.1214	98.4861	9.76941	16.0538	12.2394	12.5171	18.482	64.5726	63.5295	14.0926	104.069	18.8103	22.0852	2.66303	18.2103	14.6478	48.5027	9.25825	25.1402	15.8762	21.1738	77.5965	41.6415	19.4776	16.8106	31.9219	27.3681	76.0514	38.0134	28.7407
ANK3	624.5	612.746	536.824	422.937	603.269	687.75	588.557	288.97	633.789	393.558	355.297	276.688	629.885	427.511	460.583	622.084	492.265	372.836	644.192	396.386	467.696	560.459	226.42	197.845	339.497	553.283	297.736	375.632	419.111	312.159	482.259	150.235	274.45	233.728	423.245	465.341	517.776	492.013	323.883	442.18	421.84	107.584	333.223	708.904	664.009	283.47	329.286	142.342	1033.5
ANKAR	106.939	104.192	82.4274	88.0934	11.8284	30.0093	94.8401	98.5271	63.5815	127.076	62.8009	94.352	113.124	117.628	18.0589	73.9166	109.204	151.359	91.1377	61.3469	108.5	133.338	129.699	77.088	12.0974	91.6251	58.7184	36.8358	113.519	70.4056	56.3226	42.9107	49.7277	10.4898	49.4971	12.2488	58.0826	132.253	56.1766	48.673	55.3868	44.0893	65.2983	54.4707	40.9141	43.5564	75.2317	32.0734	10.5853
ANKDD1A	287.915	174.828	110.405	349.651	323.674	147.539	121.159	231.242	122.294	161.322	402.188	216.079	514.289	275.993	197.724	206.435	221.87	453.42	315.564	189.303	304.24	152.868	159.807	135.591	305.243	126.004	306.714	194.88	118.623	126.621	232.322	148.888	125.976	244.02	130.068	272.936	152.101	148.758	187.974	155.986	79.4396	105.096	102.293	67.2444	328.934	94.1135	143.605	130.062	242.42
ANKEF1	112.363	197.521	248.539	162.882	223.383	193.57	203.265	232.14	228.714	58.7951	152.828	94.0576	170.233	219.257	171.083	234.096	171.719	125.327	131.798	260.215	92.6713	129.958	126.342	131.742	132.508	130.323	155.669	255.239	183.223	232.579	185.912	100.019	109.834	109.504	218.265	131.515	146.807	136.142	152.634	290.603	147.72	96.5657	82.9972	179.66	138.999	120.241	103.433	90.5144	227.448
ANKFN1 /// BC037494	47.9706	88.1209	48.0321	10.3431	44.6086	38.4569	50.4979	42.6603	69.8411	47.2579	58.2186	88.1808	69.7623	66.0729	66.7774	47.1494	15.4699	51.0729	68.1953	34.0659	51.3423	40.1666	95.9552	35.7566	44.5512	78.4258	57.1496	28.2981	28.9735	25.4749	37.733	36.4863	32.5738	3.70482	42.2593	35.7515	46.244	41.267	4.11519	39.9455	43.4272	46.7689	4.34839	43.9741	5.47979	18.1555	67.83	1.84831	34.8435
ANKFY1	1600.46	1173.08	1315.2	1409.95	1514.17	1558.26	1618.49	1659.17	1395.66	1838.43	1817.71	856.101	1563.57	1688.13	1504.18	1715.88	1405.65	1481.85	1627.83	1534.28	1606.72	1921.84	1533.56	2285.47	1888.68	1633.91	1267.12	1547.79	1626.37	1280.5	1693.27	1674.51	1688.86	1879.46	1950.75	2330.07	1767.61	1243.66	1557.44	1968.21	2151.33	1961.95	1518.08	1734.86	2318.75	1812.68	1362.77	1806.3	2388.05
ANKH	1677.06	1710.69	2265.98	1892.84	1959.5	1588.34	2283.12	1658.82	1190.59	797.166	1228.46	2190.93	1745.67	1451.5	1510.68	1421.74	1211.14	1840.62	1643.82	1373.68	942.132	883.415	692.805	486.518	769.639	1043.26	1910.81	968.713	1659.44	1843.02	1115.03	704.311	772.458	1102.45	1498.68	1105.77	1837.78	1053.73	1340.09	1255.33	797.807	521.812	779.656	2016.95	1476.85	1150.23	832.915	1287.47	1926.84
ANKHD1	137.338	67.05	202.432	207.177	87.6221	111.464	125.842	168.179	176.636	118.699	156.541	133.891	202.685	118.743	214.468	159.091	173.356	229.022	76.2594	150.432	227.74	184.824	152.139	97.0908	127.825	186.458	159.123	90.1308	180.463	117.691	164.036	87.4694	37.235	57.2216	116.781	71.9102	88.4327	120.222	96.503	90.9702	50.1931	67.9438	92.2271	60.8032	60.2747	43.5433	74.8529	112.906	102.621
ANKIB1	1631.63	1318.84	1413.21	1349.33	1369.12	1598.11	1692.41	1323.86	1103.09	1393.46	1334.57	1697.24	1568.23	1646.93	1426.81	1505.52	1678.52	1265.45	1451.58	1525.04	1071.64	1197.27	1039.32	1191.72	1549.29	1311.81	1687.41	1665.16	1120.48	1063.29	1056.28	1189.03	1545.97	1754.75	1636.29	1850.22	1562.74	1423.5	1715.67	2156.84	2067.9	1164.96	1480.88	1803.71	2031.7	1605.18	2269.9	1811.06	1950.79
ANKLE1	63.7516	73.7957	66.0103	109.19	41.1463	76.7013	91.6667	126.744	92.5209	21.3347	157.313	62.8075	99.3719	93.4576	105.339	113.014	53.6583	63.6077	80.6836	50.0774	135.7	29.0667	92.6265	44.6622	64.4159	109.358	41.5981	26.6147	59.0872	75.0853	38.1329	113.65	14.5253	20.0711	25.0001	72.2865	46.5657	33.3395	54.5888	71.3063	21.0682	48.9646	30.9821	13.2166	78.7365	13.6147	76.8	80.8293	65.9167
ANKLE2	841.588	1016.14	936.584	1054.33	915.465	852.195	1129.68	770.857	826.761	913.702	783.705	794.757	939.877	953.72	754.505	933.834	826.503	1046.51	759.484	886.908	735.008	667.585	572.132	517.386	636.52	655.731	846.67	693.822	701.644	756.671	1066.86	599.2	740.885	742.877	748.933	725.118	603.324	737.282	655.106	701.722	701.027	539.362	736.495	720.6	621.076	739.319	848.907	746.849	883.521
ANKMY1	246.704	199.784	189.708	296.541	252.635	118.554	226.213	162.866	195.238	164.884	176.681	124.068	301.975	112.245	166.327	208.785	204.305	225.576	140.899	146.688	209.661	134.705	122.36	109.43	210.938	135.472	161.841	133.176	158.811	112.467	129.926	135.201	79.1899	70.3054	168.962	135.471	97.0277	70.114	114.595	66.6939	100.027	113.104	190.874	17.0538	115.935	87.4848	141.306	70.7515	171.817
ANKMY2	1279.65	1319.69	1507.27	1237.07	1226.3	1269.35	1401.16	1326.87	1290.01	1222.8	1314.39	1454.82	1323.04	1265.93	1177.35	1232.41	972.876	1122.13	1205.07	1307.45	839.263	855.298	1028.73	930.629	1196.08	979.435	1175.46	1598.8	1233.03	1099.91	1148.78	1281.88	1118.63	1221.35	1488.64	1355.51	1176.24	1568.06	1198.69	1345.61	1369.82	1058.21	1227.35	1670.47	1212.81	1057.35	1404.16	1249.14	1531.48
ANKRA2	1450.4	1432.78	1680.5	1596.67	1742.75	1259.4	1443.48	1444.17	1310.71	1081.01	1487.52	1732.74	1499.15	1364.15	1638.31	1540.4	1663.11	1754.33	1328.7	1370.15	1497.06	1447.55	1139.46	1186.7	1196.82	1216.9	1431.83	1466.48	1881.32	1724.82	1872.96	1556.52	882.784	954.04	1037.3	791.27	1318.86	1330.91	1199.21	1224.33	1252.5	812.511	1098.45	1185.08	958.339	862.886	699.402	700.684	1017.61
ANKRD1	12.991	53.618	74.7151	4.93323	39.0742	24.5641	7.98587	37.7575	2.56829	57.7004	20.3822	4.39865	23.5589	71.0182	33.6998	15.4847	23.0824	62.6196	2.87153	32.2129	15.7619	3.68728	73.9129	30.6468	3.31449	29.4264	50.3365	8.12235	12.1652	6.87379	15.9145	62.2497	3.11869	3.57272	53.0903	50.8218	58.6176	50.5764	25.996	5.74532	29.1407	31.7368	9.42673	3.97396	47.8011	4.0899	35.404	34.0046	22.2836
ANKRD10	864.613	722.057	973.205	743.531	1095.09	893.758	914.802	835.212	824.449	530.946	556.025	317.446	683.068	731.49	1019.93	532.91	710.77	1233.96	689.79	701.319	729.526	773.391	1255.11	759.245	1521.3	1087.98	1241.65	740.203	579.6	622.441	570.993	722.082	1214.88	1222.89	1124.43	949.712	683.394	1201.89	942.01	1045.63	922.943	929.013	774.42	751.626	746.791	829.313	1227.05	877.233	1028.91
ANKRD10-IT1	1025.35	600.519	1111.12	579.316	843.76	1069.68	797.311	1206.19	1669.87	1153.44	1116.96	799.963	1338.95	752.14	773.449	1220.17	1087.7	1004.45	767.432	1203.36	1246.02	545.43	755.425	501.235	541.888	972.762	792.555	515.667	869.812	523.011	603.308	659.009	1453.04	993.75	1170.8	612.486	682.921	1525	1374.73	1609.52	1484.98	648.996	1200.15	912.404	1146.31	387.701	2577.78	1304.65	1329.58
ANKRD11	2227.11	1672.77	2156.45	2178.41	1910.43	2034.56	2335.53	1733.85	2099.7	1824.18	1909.53	1623.98	2084.36	2226.65	2460.5	2844.01	2462.74	1781.74	2501.36	2503.95	2079.93	2560.68	2471.87	2252.31	2318.21	2162.77	1995.59	1458.77	1887.21	1676.17	1815.78	1598.53	1779.11	1655.48	1939.65	1717.05	1617.22	1613.35	1553.01	1689.92	1732.85	1362.78	1781.33	1585.03	2031.4	1703.44	2104.84	1827.92	2208.4
ANKRD12	3273.83	1108.18	2239.81	1887.44	2201.72	1479.71	1747.68	1238.34	2341.44	730.767	1119.67	2233.49	2479.67	1628.43	2530.43	2433.58	3660.93	3290.03	2568.25	1772.62	1580	1416.37	713.408	1699.2	1357.26	1342.77	2574.76	2250.78	1926.96	1943.15	1779.83	1001.95	451.318	589.754	677.062	535.037	979.99	675.436	847.493	637.014	662.949	536.328	540.143	568.616	695.658	593.485	595.116	424.873	804.369
ANKRD13A	5292.4	5298.27	5233.38	4309.48	5146.77	5039.3	4811.84	5266.28	4903.62	5212.15	4817.09	5384.68	4891.98	5088.09	4475.83	4233.77	4468.19	4830.04	4803.46	4251.64	4587.21	8549.43	4155.04	4274.2	5461.73	4407.47	5691.15	5019.26	4901.84	5241.63	4974.89	5906.57	5810.02	5617.35	6196.76	5012.4	5691.02	5444.13	6064.78	4397.07	4818.65	4289.36	5504.2	5109.85	4818.29	4765.66	4578.74	4857.65	4986.17
ANKRD13B	73.078	130.326	73.6565	150.953	125.285	77.1381	131.351	113.541	51.1695	103.706	96.3974	5.93111	111.081	34.8317	94.3848	97.6075	126.315	50.2919	64.2575	104.213	94.0039	155.907	67.7401	122.146	116.683	72.7312	122.263	197.054	44.7014	27.5997	96.3505	96.4086	150.932	126.242	93.3139	100.684	116.409	219.583	92.5327	54.4361	124.939	49.587	51.3273	137.149	81.5133	62.8135	143.843	180.878	140.201
ANKRD13C	41.5777	80.6222	59.9959	50.8245	74.8829	68.5087	21.0803	45.7225	83.0865	72.5399	49.678	56.9286	65.7661	55.2466	98.5261	43.8832	69.1305	124.071	55.9698	66.2489	57.1876	65.7345	86.8964	87.3629	98.6269	64.5885	180.103	23.4275	72.2073	63.4011	86.2491	64.942	30.9389	17.401	90.7681	28.5138	75.2833	96.0562	67.6051	37.3541	46.0132	22.3828	62.5526	1.78759	71.0211	42.0743	31.0739	59.6228	43.3942
ANKRD13D	1361.93	393.735	650.341	1223.47	851.489	736.254	834.095	1248.15	828.571	734.488	1126.38	288.176	742.614	1226.84	581.369	1200.66	1409.74	786.168	1099.29	639.458	718.26	834.109	704.958	855.515	1027.44	485.391	951.765	411.076	401.837	404.187	492.665	556.895	1316.55	916.185	620.949	1019.65	665.052	586.803	705.444	579.919	724.926	770.331	599.331	418.373	947.332	635.378	701.838	1182.13	674.222
ANKRD16	356.728	419.113	427.834	331.111	423.553	346.317	424.283	344.785	408.812	289.84	361.192	397.871	369.217	369.486	324.277	381.779	363.768	317.552	352.463	353.192	305.856	315.993	386.259	280.4	460.487	491.379	310.503	510.787	354.531	319.687	346.546	277.827	509.572	412.957	417.016	449.055	399.901	441.191	418.667	557.113	579.246	423.762	392.611	526.603	432.192	329.133	748.904	471.053	506.755
ANKRD17	2324.07	1982.24	2160.87	2378	2594.45	2187.12	2301.16	2163.44	2273.72	1889.42	1810.35	1901.02	2245.99	2915.65	1643.76	1766.46	2338.63	1958.26	1776.49	1909.12	2096.64	1843.97	2331.26	1698.24	2294.89	1918.94	1811.51	1972.95	1626.91	1631.81	1694.42	1586.47	1348.44	1541.34	1646.93	1522.81	1300.84	1140.17	1252.73	1793.34	1619.44	1088.08	1050.8	1549.12	1263.95	1585.21	1240.17	1568.37	1603.74
ANKRD18A	48.7403	197.856	19.1724	6.89827	43.45	33.6219	38.9268	68.0193	6.94609	24.5268	117.758	86.6025	75.4203	106.2	18.0123	45.4573	47.4387	41.4758	84.0193	51.1145	67.6986	41.9744	18.8122	45.6891	76.7851	61.6488	95.1818	46.5464	36.4062	56.6908	63.2504	57.8493	3.27262	68.8433	75.0772	29.6273	49.836	14.5773	40.6555	50.477	43.8476	47.8795	32.8743	50.698	63.0048	41.9724	21.9337	12.4099	66.6914
ANKRD18B	32.5884	21.0938	67.922	9.38504	17.6302	19.7615	40.4819	22.0139	72.6354	31.4163	80.7484	5.66466	94.245	38.3371	62.2963	33.247	14.8232	19.1148	64.61	65.2587	38.917	6.06731	115.67	28.0887	76.9364	43.573	51.5368	23.7871	40.2414	16.3509	30.1173	21.3926	75.009	23.1977	27.963	70.2751	19.9695	8.00371	55.6702	99.8413	17.9894	83.0118	83.7772	86.1406	22.8621	14.4348	108.558	30.1818	12.0357
ANKRD19P	14.0423	16.8699	11.7393	9.81004	10.7715	15.0756	9.8041	12.9286	14.361	18.5889	17.8937	27.898	21.4748	16.444	14.986	21.6739	18.1488	16.7921	24.8361	8.45872	18.4897	15.3019	17.9021	23.5654	17.2465	7.79986	16.7115	9.09314	16.976	12.0218	14.3357	15.5106	29.0389	44.0082	33.9602	19.1243	12.5853	6.71724	34.4371	20.7886	26.6916	12.3406	27.3476	17.5864	25.9478	20.5952	66.8936	36.3251	35.1814
ANKRD2	15.6068	17.4447	7.49683	7.77005	13.6431	36.8106	5.25852	20.849	7.02487	22.7635	18.9726	10.1238	8.59407	62.6673	7.94552	7.27922	23.4213	7.59388	90.0554	8.52366	11.0916	17.0243	26.8903	4.41711	11.7244	42.0355	14.3956	23.718	20.8585	10.0381	17.1427	43.7773	7.07282	8.48521	61.6661	19.6843	7.66976	8.89466	14.7581	56.824	14.5276	24.8308	6.22029	14.2965	19.0398	14.0567	12.8108	11.5311	23.8445
ANKRD20A11P	369.455	208.362	459.015	451.95	308.408	178.303	167.404	296.547	248.712	209.318	460.618	66.0997	445.795	419.357	554.463	201.442	601.652	377.777	222.974	318.341	226.516	127.682	136.825	159.238	325.731	225.309	632.698	178.528	175.619	148.466	196.766	359.575	146.526	337.932	326.815	266.041	166.134	259.049	329.394	724.246	499.218	288.167	418.315	621.777	206.42	248.049	620.671	187.397	726.288
ANKRD20A12P	234.727	252.504	178.044	161.622	180.068	191.581	165.633	210.404	209.403	233.03	305.568	137.145	225.082	147.379	127.434	220.599	258.632	169.639	316.236	188.061	300.176	34.0369	140.068	272.536	161.198	201.278	151.95	329.958	204.863	247.144	251.436	225.678	273.593	339.576	247.275	224.76	270.796	242.64	375.725	267.42	213.909	278.655	133.631	215.35	64.5562	216.779	215.211	263.018	317.816
ANKRD20A5P /// ANKRD20A5P	72.2426	307.908	75.1546	129.799	77.1579	26.5461	70.6221	81.577	93.8436	33.3333	11.1037	18.8122	80.8054	95.7604	64.9226	91.5486	110.158	47.2823	127.742	9.46315	29.0495	4.08978	14.083	48.4494	43.3078	42.2818	75.8628	34.5523	82.8394	68.8224	50.366	75.1861	3.56622	29.6051	54.953	54.0157	8.95826	38.6211	102.565	73.4272	9.62091	40.0935	83.4107	58.1423	16.7754	59.4009	59.2002	14.8552	125.104
ANKRD22	101.727	205.849	102.302	130.194	99.0675	218.662	142.965	282.486	191.024	218.789	196.567	175.168	130.815	314.199	300.163	199.264	154.038	162.213	246.7	122.831	216.577	434.867	160.275	229.017	221.586	122.897	137.862	293.856	244.316	273.668	258.605	556.714	82.8764	247.518	344.411	419.689	616.392	122.233	314.066	141.343	325.079	554.946	151.579	1329.51	519.855	309.95	127.536	278.145	287.658
ANKRD23	132.889	181.498	163.004	156.519	154.437	145.92	195.848	163.376	190.367	96.6434	87.225	96.6192	134.419	97.8997	110.112	195.378	118.531	123.032	75.0527	94.9885	132.163	119.535	109.498	103.616	139.684	86.3848	205.079	80.5974	113.272	95.8059	141.873	118.193	162.241	221.802	157.07	140.738	172.281	164.801	168.155	12.5509	70.8327	64.0145	172.038	131.334	181.459	69.4305	71.2917	189.819	253.654
ANKRD24	50.7687	5.78555	7.82412	29.2344	6.06604	23.6059	40.0338	7.23732	13.4372	71.0064	18.6427	13.0791	46.2988	6.91775	9.10148	9.10033	12.0239	11.2202	7.08207	6.53213	22.5898	9.38406	14.8309	30.475	13.9777	50.2397	74.5324	51.9059	11.4426	20.0311	24.0296	10.2554	51.3972	16.5757	41.8369	105.166	18.0326	52.0314	92.5343	132.422	15.9786	76.0562	23.2964	128.855	32.2936	27.6134	22.8228	29.0698	34.0502
ANKRD26	83.9731	145.81	125.385	121.695	92.9237	129.462	206.889	79.3434	90.5517	89.5029	68.8632	158.553	78.8005	89.7431	99.6077	79.7225	130.635	229.788	114.967	182.452	78.4958	105.905	43.4754	68.7521	90.9616	95.1583	134.838	127.389	102.586	126.493	114.517	84.507	75.4438	119.014	72.5954	102.508	84.9324	132.866	137.55	190.446	116.239	97.439	89.1511	86.9795	16.0353	158.994	168.902	77.7121	44.5671
ANKRD26P3	9.62359	96.5935	81.1485	25.3718	19.2796	55.0976	45.154	12.9012	93.3294	39.112	70.9915	25.0776	96.7059	10.1449	135.872	121.45	117.805	29.1532	98.2276	118.663	103.079	23.1899	103.511	127.876	42.0667	70.378	59.3265	89.9153	16.3095	56.8489	70.3189	42.2046	31.1014	62.3729	49.6625	43.3581	43.5114	73.9164	50.3839	75.0337	55.8756	67.1421	78.0472	44.8472	64.0277	7.90378	8.53769	50.5502	94.5841
ANKRD27	1755.56	1836.43	1587.33	2000.78	1553.4	2506.38	1776.96	1793.56	1772.04	1758.39	1578.22	1146.4	2414.74	1698.54	1996.86	2281.03	1883.93	1344.41	1711.46	1970.35	1697.35	1606.98	1240.63	2048.63	1972.15	1808.18	1300.29	1698.63	1877.08	2044.42	1895.51	1533.54	1272.38	1180.8	1444.11	2005.66	1531.7	1388.38	1507.18	1964.6	1562.73	1547.54	1396.9	1613.42	2157.15	1507.96	1249.36	1933.06	1785
ANKRD28	367.616	1257.53	741.46	530.909	470.334	484.321	671.277	692.039	549.554	1185.52	449.968	221.881	300.714	273.963	549.583	313.439	223.244	366.23	434.673	313.665	474.952	884.698	1768.04	445.312	471.471	367.469	394.633	456.435	150.267	180.471	270.968	322.629	374.955	973.995	312.085	543.139	470.479	438.103	274.071	319.445	673.618	1397.28	467.083	401.137	447.548	273.689	403.947	228.6	189.583
ANKRD29	29.6701	39.8375	48.6649	35.3512	38.9182	7.06294	8.69172	41.4298	85.6114	66.2869	30.2091	2.92779	67.1299	58.5382	84.0751	65.8471	86.9699	79.5644	135.084	66.3615	95.7945	55.6154	38.9644	21.8206	36.355	9.80818	38.3088	41.7813	57.3124	16.5625	62.4073	94.976	29.6663	28.0551	55.2998	37.098	32.9955	56.0906	65.1668	78.9522	14.7945	68.0253	70.4432	41.5597	7.88157	2.66544	9.89374	8.28109	63.773
ANKRD30A	4.35792	11.702	4.06578	4.08076	3.10339	5.87472	8.62237	2.34711	3.15771	3.83402	4.55448	10.4494	12.2834	8.31025	6.35582	10.6675	6.20989	7.60728	10.0333	6.92674	3.34801	7.81186	8.30059	28.1557	21.6983	4.70514	4.89823	3.9976	5.59658	2.36714	4.52977	3.10178	24.6681	33.941	7.48366	4.4523	5.21692	3.48047	6.25463	5.69932	9.92442	3.05059	5.07654	5.67664	7.70581	3.50438	4.13148	9.11701	2.6576
ANKRD30B	7.85345	27.45	1.78928	11.8203	26.6093	2.20204	1.76967	3.22857	6.51756	4.03417	17.2928	5.64489	3.90262	18.2228	3.92739	3.51022	7.17398	33.6324	2.94172	15.1242	31.1438	2.26044	15.1074	10.0217	5.81597	45.8276	6.74206	8.3618	6.29327	7.48901	5.35756	22.785	46.1754	18.2163	42.0769	6.381	37.6719	4.38026	3.38531	35.5597	5.14956	5.52551	21.1172	3.12309	32.1848	36.8555	39.1942	5.55771	52.0019
ANKRD30BP2	19.0334	72.5991	48.3071	42.874	24.8158	43.8911	16.2734	8.51455	54.0068	42.6074	23.9307	82.4014	7.76577	48.6934	83.2667	38.0733	89.2499	82.4556	52.1834	29.6297	12.6851	57.856	6.75034	25.266	46.1528	77.9052	23.2202	80.9793	42.4957	29.6846	25.3098	26.4859	31.3989	84.0884	54.8895	77.8628	54.4936	64.2883	5.13045	104.528	19.9101	69.9689	56.2533	63.4932	23.3008	65.5327	41.0076	49.118	11.0779
ANKRD30BP3	83.2033	166.419	103.084	95.6041	86.9475	67.2199	40.1032	71.9019	82.8676	170.695	113.306	140.496	161.505	120.401	117.706	105.064	113.054	116.037	128.275	138.768	100.683	57.8766	71.6977	53.9413	15.6384	111.757	118.326	106.65	63.7181	83.1152	111.086	91.991	50.2211	12.6994	42.1068	74.5286	107.665	58.7016	208.741	98.4044	114.842	123.873	93.3785	59.2334	109.486	20.2107	74.4466	64.8686	71.9628
ANKRD31	5.27167	7.31993	5.26857	15.1368	6.31206	4.20966	4.27034	4.85038	7.79537	3.78516	4.7264	13.5115	6.21867	5.1555	9.44779	8.47331	9.17213	11.2027	8.24968	5.95499	3.32319	4.56859	8.35769	7.31646	11.0878	3.5716	6.24821	7.71207	3.44119	4.52036	7.80741	6.19701	4.49656	20.4584	7.72672	3.50163	5.19842	10.5126	22.3444	2.32324	6.094	5.23381	3.26053	9.79508	1.93814	6.79452	10.0927	9.38888	5.47794
ANKRD32	381.952	382.339	305.088	411.878	307.375	353.334	545.39	363.436	369.486	193.659	294.451	196.963	436.463	312.363	241.582	450.361	266.804	183.284	207.137	271.665	271.804	442.178	272.989	383.743	486.289	378.264	217.504	565.45	280.714	277.032	258.841	292.316	254.932	229.482	363.627	496.954	304.079	381.378	405.717	479.38	487.982	411.805	332.818	629.939	430.275	351.435	321.905	545.43	508.963
ANKRD33	25.9975	50.5874	88.0442	20.2039	31.2058	67.0708	55.814	44.8813	54.3174	32.3569	60.4591	95.4052	121.219	20.6926	85.5752	134.832	31.283	20.0335	87.0517	24.4663	15.3583	46.4175	95.8243	53.1003	63.2139	93.0556	114.752	27.1347	48.5013	37.8831	25.6022	14.5614	56.3188	112.52	37.2798	18.6529	95.9745	83.2682	49.4312	79.7218	48.1201	84.589	13.5556	58.77	12.9229	49.3293	52.1688	19.5589	21.0833
ANKRD33B	40.0211	288.81	276.334	181.953	103.953	121.029	99.7934	174.175	253.767	392.161	36.5695	33.3458	41.542	130.683	38.0106	94.6164	36.6268	38.8959	30.4983	51.7867	31.5761	370.212	216.939	109.874	175.623	102.705	57.9598	37.487	40.2643	24.7996	27.3337	58.6027	133.859	183.227	28.3972	113.508	138.459	241.984	120.455	149.555	74.1325	193.747	43.1708	328.028	142.219	118.992	123.206	229.86	39.2434
ANKRD34A	15.7499	67.088	18.4682	22.9497	17.9894	17.1047	10.3723	33.4232	22.7694	11.9073	76.87	11.5263	21.6918	10.0703	8.38202	17.385	26.6442	25.6833	15.0335	19.7398	12.7518	19.9002	20.6208	13.5274	17.5869	11.2659	10.0218	16.8603	10.7035	8.95498	13.518	15.3515	14.8521	27.8999	46.1013	15.2708	16.2853	33.0048	80.0442	13.809	16.9455	10.835	33.3198	23.0419	21.8144	142.414	108.849	12.8683	20.4524
ANKRD34C	27.5169	106.601	43.0047	5.18192	56.8875	94.0935	30.3437	90.6416	42.283	49.8966	66.5604	118.514	27.8418	79.6191	121.491	77.7195	46.025	128.972	86.6275	81.5383	43.8856	73.5758	121.967	59.4919	93.36	57.7565	63.8769	11.259	57.066	38.7842	79.0174	27.0356	14.9604	11.0209	17.7274	3.14437	47.9192	16.0074	6.76494	34.5755	48.7069	9.96434	9.53177	50.7647	58.9151	34.833	27.4854	21.4965	43.6595
ANKRD35	142.532	130.409	22.8456	68.6756	95.1846	75.8631	34.3428	145.314	92.1434	130.244	189.991	122.094	200.982	145.036	63.1375	134.951	142.525	50.1749	43.3692	57.0425	138.51	56.9693	100.667	124.688	149.22	172.457	180.174	148.399	115.345	98.1634	155.016	188.901	245.292	93.2971	189.908	107.727	160.191	142.169	36.8193	55.378	49.8456	236.748	120.029	129.431	267.76	165.227	188.565	112.337	132.981
ANKRD36	291.568	231.744	515.087	721.412	369.57	261.824	462.562	457.447	686.725	266.596	351.572	135.434	426.388	259.247	524.743	372.738	507.033	552.697	379.455	426.082	273.429	306.103	199.382	245.524	368.781	276.731	270.433	354.387	375.276	319.39	256.712	229.366	175.681	131.462	150.446	167.132	164.848	256.787	186.769	173.336	237.919	172.688	105.95	152.688	218.953	158.122	190.106	157.683	203.695
ANKRD36B	2759.95	1254.86	3064.42	3404.92	2926.63	1940.33	2687.06	2048.23	2610.64	1898.1	1446.34	852.426	2884.71	1468.25	1742.14	1904.54	1803.12	1804.78	1294.91	1787.79	1377.39	1751.15	988.468	652.664	1781.25	1523.75	1515.04	1395.37	1195.95	779.306	820.513	440.932	620.832	1092.79	1295.59	1341.99	967.031	1207.86	1204.04	2441.38	1256.3	795.504	1049.25	1162.81	1965.11	948.764	1345.86	877.097	1597.89
ANKRD36BP2	253.094	602.02	419.05	350.75	381.309	282.629	323.89	275.965	355.147	231.042	254.596	300.607	395.897	335.137	610.91	415.773	417.706	443.815	412.433	374.542	321.983	358.031	217.271	189.587	300.364	452.819	362.786	473.512	290.851	162.327	216.248	165.796	145.207	233.681	170.066	276.75	214.403	509.365	203.049	562.69	495.357	194.36	135.815	233.626	549.392	74.3958	444.809	140.576	277.202
ANKRD36C	126.296	67.6056	145.706	158.224	102.71	67.1845	81.4113	84.4061	132.108	78.2266	115.043	45.8384	110.875	60.1286	139.457	139.323	155.37	198.143	89.1944	105.579	135.472	92.5724	98.0137	77.9089	80.7503	149.457	170.095	70.1033	78.6457	71.6543	103.389	83.2597	58.3521	66.3823	26.1528	94.9425	27.3781	115.972	63.0096	110.565	15.2818	43.0958	15.7328	52.1298	92.8502	59.3125	99.4062	46.1161	102.769
ANKRD37	356.932	291.41	280.743	358.522	281.861	388.318	384.274	353.046	337.297	384.819	246.176	262.868	273.404	333.867	249.488	284.93	238.39	304.646	341.566	316.909	414.33	343.422	282.75	423.027	318.408	389.56	423.786	742.33	457.704	324.937	364.091	337.818	339.99	398.814	393.825	520.142	506.042	388.561	466.566	792.175	1175.25	287.711	354.444	412.455	561.519	334.933	630.163	343.001	347.009
ANKRD39	354.069	305.455	345.554	311.04	321.413	200.492	404.764	227.599	288.011	331.81	248.486	210.626	164.988	302.399	230.133	298.836	278.87	204.432	241.954	291.673	300.592	225.034	233.874	254.895	213.558	227.723	313.907	316.815	253.344	240.159	287.583	179.667	203.656	222.696	306.23	274.811	235.728	329.105	326.26	361.849	244.62	275.994	228.728	283.445	393.207	342.633	256.359	296.593	254.635
ANKRD40	681.098	1115.25	580.969	1194.24	838.957	940.526	961.038	708.196	1000.05	934.72	847.117	754.064	892.919	664.067	912.303	937.225	1161.15	542.299	1001.27	918.144	1010.21	693.974	958.887	1014.71	1014.67	1093.92	680.557	771.898	992.883	766.586	935.465	780.407	730.065	671.953	773.487	649.916	671.205	741.113	764.554	872.58	785.879	923.121	937.415	753.843	853.586	849.809	601.204	706.611	858.389
ANKRD44	4500.57	4173	5387.28	5417.41	4788.59	4587.99	5500.47	4760.75	4676.84	4281.82	6061.34	5172.52	6669.7	5631.61	6714.67	6259.81	4822.21	5215.62	6140.33	7326.47	4728.69	5397.84	3175.23	3633.06	4247.79	3460.96	4607.42	3549.72	5475.49	5067.78	5481.84	4675.4	1484.66	1477.25	2581.39	1789.4	3073.73	2515.03	2354.88	1963.19	1855.82	1793.85	1909.01	1721.57	2411.71	2209.99	1541.79	1484.24	2199.85
ANKRD45	26.3908	6.31484	5.57056	19.8877	6.00255	19.2748	5.13892	23.1383	3.74872	7.52712	13.2666	64.0707	10.4126	3.55516	9.57985	47.1761	3.67387	66.2369	36.0586	35.2179	1.77074	41.825	6.17233	60.4506	6.51711	23.5675	28.5203	61.8239	7.54619	5.625	8.0135	23.0692	41.5147	50.6849	2.58974	44.5752	30.7812	25.7836	6.02238	6.85312	44.1344	14.0952	5.88162	32.0224	11.0715	15.5929	34.7043	5.46478	2.05954
ANKRD46	709.693	656.945	561.862	577.084	613.002	752.426	956.197	659	590.523	425.022	553.722	527.96	575.097	692.568	520.865	717.496	591.199	322.07	434.389	703.455	529.942	556.32	387.32	485.687	425.998	719.362	369.02	750.156	867.358	681.752	892.617	452.463	326.701	259.779	695.215	667.96	578.772	312.496	505.989	658.422	657.293	401.757	390.86	496.23	555.436	604.979	391.886	376.914	707.407
ANKRD49	1948.89	1765.7	2120.92	1970.95	2374.06	2565.8	2350.91	1708.08	2291.62	1308.94	2085.18	1582.79	2104.05	2263.55	1744.74	1858.77	1674.98	1733.78	1705.04	1921.92	1567.27	1845.17	1189.75	1228.62	1920.15	1764	1960.41	1491.66	1956.3	1961.53	1657.64	1749.64	1734.48	1376.39	2241.84	2221.28	1926.94	1682.81	1663.17	1872.01	1537.32	1124.67	1425	2344.31	1802.47	2310.85	1592.56	1600.57	2398.05
ANKRD50	441.748	418.467	233.036	406.733	347.508	583.089	311.729	422.635	383.389	572.085	586.788	436.511	432.93	423.067	302.969	470.252	450.03	375.092	553.769	328.931	586.019	161.171	550.48	798.943	489.407	504.63	266.742	211.918	474.827	430.377	438.323	464.635	558.823	446.586	324.801	553.811	559.321	193.104	251.092	218.423	292.906	603.949	530.924	130.669	298.699	827.487	320.796	510.089	193.823
ANKRD52	245.865	195.409	238.32	245.829	255.996	206.188	239.02	215.665	327.121	100.082	203.677	65.4299	144.438	348.906	344.447	227.747	216.061	186.196	249.777	201.763	249.452	226.022	288.252	294.153	227.264	190.623	71.2282	236.681	144.524	179.471	196.334	167.591	71.6401	98.493	220.982	216.1	172.607	69.7038	190.324	214.827	149.067	121.383	28.5968	162.913	343.288	138.081	198.205	122.222	286.505
ANKRD53	156.359	149.42	87.0794	74.0924	168.762	23.0528	95.0368	123.604	134.489	109.231	67.5885	59.7343	74.8618	174.968	176.342	207.746	78.2363	451.106	34.4733	186.357	147.873	31.71	220.373	52.0732	87.9544	46.7528	131.47	68.5339	149.039	73.132	62.4017	74.9569	37.0524	111.042	24.4063	155.627	29.7184	192.053	139.254	157.091	118.773	160.585	42.3745	471.565	220.046	104.273	208.757	248.98	282.318
ANKRD54	488.75	488.902	450.253	469.858	399.105	452.812	387.517	441.603	500.197	480.868	560.161	423.04	440.651	530.881	617.718	492.06	562.513	644.984	515.827	635.535	390.131	452.923	511.186	461.713	438.526	574.219	442.744	496.775	441.945	452.839	486.083	379.752	380.3	537.191	466.951	469.575	399.078	438.946	376.286	667.487	351.97	401.375	350.046	254.749	493.331	453.191	459.579	482.015	408.785
ANKRD55	523.76	409.527	1045.5	1152.93	1024.77	683.992	701.071	434.363	444.842	835.289	393.18	649.753	605.359	343.326	872.68	427.266	665.738	974.55	824.659	858.088	292.477	521.908	382.521	282.729	338.092	363.849	509.14	527.644	595.534	1067.46	957.811	241.035	225.637	473.512	597.86	355.928	650.506	632.014	412.727	498.632	497.626	276.113	324.783	1347.4	493.581	220.595	565.907	290.795	1587.32
ANKRD6	205.325	197.603	118.246	171.831	170.847	177.37	143.565	247.329	161.637	115.681	121.07	212.065	133.139	110.258	96.9157	165.034	170.142	117.617	122.287	142.885	171.451	105.879	117.289	147.538	171.656	92.8102	181.957	121.161	123.294	115.345	184.301	153.018	148.833	86.8437	197.128	129.083	137.782	159.254	114.547	128.59	89.0928	133.694	123.757	151.529	174.888	132.483	167.123	173.863	198.959
ANKRD60	7.42458	4.32461	10.5826	6.17447	5.78666	9.23889	11.5068	10.728	10.5832	13.1858	5.79156	16.4145	8.51789	19.7912	9.27198	8.58106	6.75024	6.67469	8.97478	4.9399	14.3176	8.32005	6.01358	6.29057	11.8634	14.1132	15.9822	6.60792	13.678	12.3919	10.1245	13.2813	6.94136	12.2512	8.00266	10.9412	12.5503	7.54247	6.52213	11.9947	7.53374	12.4108	17.2745	8.09742	6.48746	9.84585	8.3732	10.8305	8.29358
ANKRD65	85.9577	72.986	68.4294	39.4445	114.534	111.847	142.161	123.295	84.2673	74.632	82.3773	129.774	35.877	19.0027	38.7866	107.643	99.2042	110.9	32.2163	81.4673	127.746	30.4149	76.3235	125.506	108.315	104.976	110.792	80.5764	86.0997	82.2542	171.058	108.573	55.0573	14.7557	154.378	82.5725	83.0128	57.2362	18.162	134.953	15.3713	38.6114	96.6603	36.1534	110.868	107.161	51.0198	146.924	235.268
ANKRD7	1.03539	40.134	1.27123	0.768367	3.70531	13.3259	1.35404	16.1495	13.5136	17.7658	12.4833	1.40743	24.8922	30.6071	5.33802	2.65591	40.1821	52.7425	52.1984	5.24319	51.9604	1.03278	6.46074	21.3914	3.24616	33.1076	2.22514	4.61094	3.49032	23.6574	13.0869	36.5446	22.7126	2.52411	1.42678	2.00973	22.3965	8.68177	12.6564	20.5297	43.4048	6.21999	3.68243	56.0566	2.02796	19.633	7.86071	3.13536	1.87145
ANKRD9	278.27	581.529	532.61	247.637	181.797	317.316	237.638	397.118	475.193	879.921	222.481	361.146	159.867	224.625	302.784	285.811	524.123	220.673	304.915	511.32	384.462	288.924	902.03	858.398	174.71	232.085	391.646	231.402	104.636	263.853	209.274	323.343	411.132	673.276	91.7317	336.069	894.125	696.099	371.177	57.4812	477.448	779.793	436.78	476.419	247.871	327.202	546.952	735.79	396.694
ANKS1A	793.078	790.711	550.476	590.053	775.813	858.846	443.861	635.793	555.517	665.46	756.673	483.088	574.321	629.749	546.535	537.553	452.966	459.436	503.879	493.294	614.045	741.815	755.232	918.058	636.012	627.41	438.502	566.546	673.349	586.977	715.663	788.749	422.265	458.866	447.199	433.532	677.021	420.196	540.928	447.956	776.532	992.137	666.627	414.533	580.676	583.98	402.042	585.965	443.659
ANKS1B	72.0441	48.5328	44.1575	107.375	58.0071	48.5159	75.2805	65.3997	75.2086	17.3979	44.087	67.8448	134.113	16.2487	17.145	40.1721	144.234	28.0698	107.222	100.108	90.278	62.0126	13.3509	98.5142	12.2096	30.5398	82.2364	64.4112	61.1252	34.3459	42.9845	83.2398	7.45872	39.6379	10.0376	35.7113	68.4196	19.2467	87.5669	39.7675	11.5674	23.7606	30.3596	71.2463	24.6521	13.4567	94.7203	3.61112	9.89452
ANKS3	19.2882	19.5633	187.195	160.687	165.641	64.6436	171.496	100.347	150.971	16.2192	106.778	112.33	234.966	63.2012	34.7835	157.687	162.898	153.735	94.0707	118.335	121.793	166.294	26.3737	132.152	9.07418	124.719	225.215	18.8906	26.3585	182.532	79.1392	40.0247	100.966	167.774	91.6236	82.9935	13.4611	169.347	123.149	200.172	126.414	21.2216	151.274	124.859	13.2619	125.197	156.053	199.197	324.896
ANKS4B	39.9765	54.096	12.4846	15.9863	34.1277	13.4259	5.38488	10.1386	11.7425	14.3418	7.30927	8.58071	19.9489	40.4419	28.1158	9.46983	15.4074	12.5812	10.5317	20.7277	9.46753	10.6092	52.971	7.02547	4.25046	28.8027	26.4214	14.231	6.20308	8.05658	11.071	22.3102	12.1049	15.5753	13.1423	105.868	84.9417	43.3991	88.4917	88.265	13.4038	10.1031	10.8361	13.6246	22.5292	17.467	6.30306	14.4706	8.75504
ANKS6	182.599	57.9889	225.542	190.642	224.954	154.407	238.709	18.8849	239.634	134.215	212.532	184.425	147.098	22.9844	271.938	202.057	122.777	151.599	68.2376	307.743	117.101	85.0271	88.0188	20.2795	158.42	66.0289	223.033	116.378	173.926	195.238	141.737	35.1778	99.1588	212.84	169.63	165.848	188.936	61.8766	157.813	254.722	45.9228	9.60835	102.133	181.42	210.639	208.904	205.779	39.8748	227.535
ANKUB1	128.009	87.4286	151.586	73.4733	150.603	62.353	64.1123	105.412	33.9596	120.894	78.3431	131.216	197.298	41.0634	116.49	100.509	124.102	191.676	156.105	138.433	107.514	94.4376	120.515	134.091	91.6822	108.322	140.626	132.737	137.41	151.348	152.578	108.277	52.6161	102.39	157.926	80.5223	124.174	127.21	172.112	102.764	138.494	146.235	87.6376	31.1339	111.316	153.876	186.51	167.282	183.813
ANKZF1	641.994	470.585	641.686	649.916	697.049	538.791	832.789	438.88	601.136	291.916	520.513	508.138	609.818	517.896	561.933	655.2	642.625	531.265	526.913	654.525	389.173	403.336	375.007	353.914	601.502	640.865	542.089	475.059	667.289	504.918	531.969	271.91	739.531	695.704	815.665	689.658	476.079	436.407	673.337	761.678	394.137	353.245	518.599	724.711	691.194	386.181	684.969	646.607	1082.75
ANLN	97.9777	71.0429	55.308	77.7275	100.707	76.7099	8.45168	69.5197	42.5525	13.4361	85.9919	69.3314	128.245	43.4305	106.35	93.5557	81.7861	52.5805	62.7955	62.7912	39.2492	19.123	44.6039	96.6359	89.6972	48.0837	27.7968	142.523	85.6625	59.6175	21.4625	60.9913	24.136	8.18197	53.9378	48.2638	75.7291	104.55	74.2846	67.9695	111.719	153.234	98.4829	130.439	83.7723	39.1603	105.363	87.2987	6.32353
ANO1	43.902	115.288	12.8219	44.645	100.695	116.907	81.2335	58.7713	12.5902	149.93	88.5102	120.3	84.9619	109.563	114.875	92.379	103.837	32.134	74.7894	80.2633	70.9824	81.1308	22.4417	37.9777	55.0453	96.1556	92.6518	64.8871	18.1428	45.4677	110.877	102.62	131.287	77.693	47.8836	18.654	14.7031	90.6623	40.4125	171.937	113.737	9.48645	12.81	13.4475	14.6259	29.065	89.7284	122.453	32.909
ANO10	352.006	357.178	135.585	238.43	259.67	361.078	240.379	184.67	306.806	248.334	501.782	373.195	184.15	296.457	197.068	291.666	350.21	264.656	367.431	232.925	368.126	144.946	620.263	644.467	513.108	306.649	497.506	340.405	422.525	524.291	374.414	612.249	548.853	444.077	375.191	504.386	453.469	318.415	529.377	314.057	303.718	1019.32	665.209	467.091	432.226	556.329	437.153	577.565	396.462
ANO2	5.62113	26.956	22.5977	53.9942	10.098	19.4669	8.42607	53.9442	20.5809	75.5905	10.0053	79.7689	28.9198	18.0428	31.5551	52.197	47.0936	38.9548	52.0973	41.7411	26.5638	23.0513	52.123	48.1137	7.10839	13.2119	31.7506	12.8826	51.6603	66.7845	48.0789	16.1205	26.4119	31.0191	16.9969	72.1474	98.9638	81.9768	7.11928	13.9409	4.60769	67.5448	9.98522	62.6675	42.204	11.866	28.5712	18.2798	13.5605
ANO3	34.5764	8.96939	34.7568	25.1562	9.82722	37.1528	27.5706	30.676	14.4356	50.1802	50.7509	49.6	49.2857	7.12956	39.8127	42.8673	7.94338	51.6539	49.8417	63.5586	4.24375	36.0983	27.2158	28.7117	53.8572	5.9124	57.6827	9.87437	35.7977	38.2917	45.7437	38.6174	3.5122	4.80051	8.06402	3.3016	4.39004	16.5222	15.8369	63.7819	34.401	49.5324	30.3925	55.9857	22.463	43.8992	33.8668	30.1191	75.7346
ANO4	16.6412	77.4842	76.6448	19.0693	51.9837	40.0498	38.3955	41.7138	30.0673	71.5181	65.925	39.1867	64.3688	48.5891	126.092	92.0572	54.2561	76.9808	30.3443	60.6678	54.3629	73.0873	20.7542	63.9706	43.3447	56.8045	50.8333	86.648	97.3393	84.2162	79.0783	25.4998	43.837	7.34104	81.921	19.6463	10.5792	83.6642	45.4006	40.6888	45.3066	38.1878	19.9328	14.7164	47.0718	43.518	52.6669	36.0785	65.4874
ANO5	26.7264	126.384	98.8071	50.2791	45.4084	73.6985	75.0365	120.793	22.1841	155.2	144.897	28.7846	153.027	112.467	108.54	66.4647	108.519	159.452	100.314	129.035	26.6172	21.0902	193.156	186.443	102.026	77.8688	23.7187	13.0289	82.7914	82.8074	153.809	159.006	28.0054	63.737	124.197	18.5864	119.719	90.4449	19.6203	68.7737	125.692	43.9632	28.3397	7.33624	99.467	88.1565	103.519	143.807	49.6278
ANO6	2906.93	3804.87	3369.08	2886.44	2103.84	3016.54	2351.19	3082.12	3218.24	5545.38	2985.5	3299.77	2116.21	2918.75	2597.42	2740.91	3012.13	2682.25	3180.91	3382.6	3194.61	2236.9	5262.3	4448	2516.61	2902.33	2538.67	2709.35	2949.67	2976.95	3549.98	3281.39	3381.67	3756.35	1835.1	3565.7	4068.93	4112.42	2692.21	1673.21	3129.31	5143.87	3732.49	2895.18	2999.99	5037.14	2709.13	3343.59	2507.55
ANO7	58.9026	41.5845	17.4611	35.5169	48.6137	34.2718	166.267	113.498	163.754	230.763	24.0007	26.4061	60.145	23.3599	49.2817	32.46	38.7562	118.426	33.7082	22.9605	43.7056	45.3044	206.815	53.1671	29.9136	199.287	32.5433	146.048	284.59	38.1266	278.398	231.748	60.7912	53.3072	81.3474	71.6948	36.816	260.647	130.112	53.891	37.4954	48.8143	49.8817	62.7654	76.1564	126.761	106.495	165.081	31.9532
ANO8	413.7	323.668	398.735	504.084	436.525	406.646	515.539	442.756	479.661	427.561	215.722	235.284	415.518	315.625	297.766	402.202	474.76	342.884	433.94	369.942	454.054	370.185	410.421	416.47	370.509	357.289	357.566	262.15	352.426	424.507	464.19	304.399	270.173	376.05	272.544	223.466	408.713	342.969	265.198	230.384	325.999	337.076	298.579	281.962	374.478	235.774	363.733	382.773	428.723
ANO9	833.558	310.118	638.051	617.34	600.991	580.284	694.152	430.998	575.102	431.805	433.701	265.367	555.609	376.451	636.157	549.767	565.418	803.381	597.217	633.165	405.83	725.892	289.071	397.781	522.44	467.279	578.301	540.066	567.703	432.823	544.363	236.618	231.401	392.284	423.117	335.853	507.44	549.381	476.613	468.797	394.793	258.988	344.078	577.217	542.37	174.418	419.884	207.798	698.511
ANP32A	2283	3213.3	2925.4	2538.48	3163.8	2483.51	2392.06	2491.35	2719.04	3088.38	3470.81	3921.69	3378.48	1957.71	3337.94	3418.54	2768.4	3939.12	3587.04	2903.03	3140.97	3388.96	4009.27	3706.05	3445.91	3852.81	5815.74	3354.83	3518.16	3880.03	3020.54	5189.66	2791.12	2004.15	2171.73	2049.8	3171.25	3656.19	1936.55	1590.84	1743.05	3101.76	2747.02	1884.93	1805.86	2420.73	2306.75	2289.19	1749.37
ANP32A-IT1	405.175	210.697	274.94	374.841	241.427	249.303	210.058	415.452	331.007	470.138	438.36	123.023	494.404	420.786	557.828	417.489	520.437	498.107	488.652	309.484	532.065	354.633	475.68	263.265	699.878	385.651	346.208	140.172	142.202	245.353	298.741	141.177	148.522	95.6388	183.563	142.958	164.34	245.555	279.342	197.955	241.467	360.307	301.317	129.555	130.513	337.443	360.012	315.084	189.883
ANP32B	10976.3	12343.9	12376.4	10011.9	12446.6	12516.5	13883.3	10475.4	9619.23	9979.42	11933.6	14728.8	10163.7	9646.18	11480.2	9124.31	10073.3	13909	11186.3	10360.5	10128.3	8834.23	10427	8201.7	11376.2	11231.5	13494.7	11494	11990.2	13503.6	9374.21	8141.74	20051.1	21241.7	22323.4	22134.1	15706.1	14507.3	18350.1	20037.1	19930.5	21155.3	20795.9	25804.5	20452.5	20937.5	19378.2	21870	24916.6
ANP32C	11.814	4.82496	14.857	9.51309	26.7694	8.90313	30.5426	17.2927	9.81043	11.065	18.8362	153.208	21.2748	82.6613	16.7001	64.1517	41.2085	23.4312	79.9526	20.1668	14.0663	28.7233	60.2886	60.9328	11.1567	10.6129	79.3097	9.1445	11.3981	100.794	80.7782	19.7828	22.6482	5.35125	16.6422	19.5633	6.50131	14.3179	16.3101	3.69858	8.69101	13.5334	16.9853	15.2196	15.6657	6.55298	12.4339	44.4407	11.0073
ANP32D	5.0873	62.1428	6.78949	8.44472	12.4194	3.7853	6.64247	2.39785	44.2911	8.51134	8.7796	25.6291	15.9868	9.23023	81.6115	17.6708	8.89316	5.27347	1.92203	13.9803	22.0977	18.4263	25.7541	16.989	11.9711	7.95863	6.53265	6.46457	5.69578	32.4724	6.31971	14.9849	10.9249	18.9099	8.76895	20.737	5.925	33.7153	4.19291	47.3722	7.83459	7.98068	2.38186	5.60287	44.9441	26.9259	30.6359	6.36719	6.54424
ANP32E	2805.97	3699.2	3804.26	2800.52	3234.91	3681.52	3827.88	3165.03	2950.8	2298.54	2240.45	3411.86	3650.45	3336.24	1877.94	2402.15	2720.11	3598.13	1740.37	3106.37	2190.17	2124.25	793.086	2188.81	1420.35	1588.85	3358.6	3271.39	2638.77	2681.14	2679.96	1939.09	2661.97	2195.84	2812.28	2443.14	3571.31	4466.88	2601.7	3582.92	3336.85	3191.86	2763.76	4332.97	3376.17	2167.86	3480.25	1851.13	2392.83
ANPEP	714.565	1406.82	1291.34	1177.33	1857.5	2870.52	881.387	984.785	2289.28	588.515	1380.53	2359.33	572.844	1341.68	2150.73	1930.88	890.398	2361.5	2395.45	1944.2	2479.64	4324.53	5017.62	2200.71	1699.04	2016.25	3338.12	1771.7	513.13	2632.32	2474.54	4831.69	4681.57	2543	2700.4	4354.05	3462.55	1804.08	1845.64	1130.74	2424.63	2015.49	4223.8	1644.89	2151.54	5793.58	1584.13	3704.85	1223.68
ANTXR1	113.215	107.263	59.174	106.227	232.31	151.391	43.2449	96.357	156.834	43.9062	317.973	276.986	122.92	323.344	184.054	218.355	243.884	253.486	118.394	262.102	161.413	177.805	24.627	71.7799	100.953	126.881	216.373	230.834	141.398	131.312	209.059	240.553	79.0859	138.426	87.6575	56.9761	53.3301	140.901	250.239	105.123	202.223	171.438	66.6795	222.865	160.101	135.846	47.6006	153.823	129.547
ANTXR2	3067.7	1870.13	1903.74	2253.56	2184.51	2256.37	2191.01	3336.17	2403.65	2840.85	3942.45	1862.96	2230.45	2674.07	1772.15	2470.8	2674.1	2081.15	2831.74	2331.03	2777.34	4629.99	1581.1	3010.1	3032.6	2476.83	2236.7	2003.81	2704.6	2971.63	2642.16	2979.12	3166.06	2458.74	3205.12	2982.72	3450.16	2487.45	2788.01	2040.66	2789.86	3826.54	2697.93	2584.73	2915.51	2595.74	2886.69	2334.66	2246.33
ANXA1	16580	16980.2	11784	16398.1	12964.7	14838.7	9949.42	13335.3	11610.2	18885	18414.1	20818.8	17457.4	15379.7	13115.9	12093.2	15175.6	15669.4	18785.6	11561.8	16925.6	8856.65	22352.6	18344.6	19497.9	15459.5	18158.2	10493.1	15114.8	17127.7	12008.4	17376.3	20711.1	18302	16148.7	18825	16774.4	16354.9	13276	12195.2	17511.9	33431.9	24038.6	16425.1	19238	20967.7	14770.9	18322.2	11218.5
ANXA10	11.4171	129.54	13.8198	13.2834	11.1327	6.96653	5.46223	5.99879	33.4974	11.2856	13.5664	17.2821	19.8116	17.9941	20.9063	18.333	73.6015	23.7964	19.6459	28.431	9.41513	9.96608	10.5381	12.9806	19.2448	15.7399	18.3264	41.0803	11.9388	14.747	12.5984	11.5321	7.38195	10.2979	12.854	9.3698	11.4369	18.461	9.79521	113.257	37.3265	13.1566	16.9946	40.0106	12.3718	6.88349	60.4087	8.47248	6.75909
ANXA11	7409.05	7494.81	8349.75	7697.68	8336.09	8328.35	7828.42	7117.12	7143.89	8399	7173.55	6152.75	6172.25	6304.12	6620.22	6327.46	5944.46	5953.65	7476.01	6370.39	7245.02	10806.6	10005.7	9891.77	8954.39	9239.47	7204.21	8237.49	7311.28	8889.27	7086.6	9470.86	11433	9883.35	9604.35	10404.4	9275.57	10265.9	9116.58	7426.72	6269.72	10493.5	9457	7826.46	6437.31	9321.29	6746.29	10429.7	8471.56
ANXA13	22.4378	13.6507	42.1805	20.7547	60.0748	13.122	39.8742	72.8485	52.7979	12.725	34.3936	25.0764	103.497	23.8197	24.6017	45.9641	30.8813	26.2593	88.159	109.929	8.2658	41.7677	39.3354	86.4417	84.0228	55.1024	21.7178	100.343	16.8988	79.1395	39.6221	29.0435	52.2214	81.4953	16.138	19.717	79.9652	27.1929	67.1181	108.411	76.8413	15.3078	75.3814	130.02	73.6788	77.8551	51.3041	5.05971	23.5906
ANXA2	11264.9	12554	7857.3	8659.83	9455.5	12266.9	8336.69	11746.7	8066.31	15463.8	14022.4	13378.6	8635.84	10961.4	9845.95	8545.94	10865.9	12987.8	13503.4	7810.37	11218	6535.76	19028.2	17286.9	15666.3	13490.2	12673.6	12690.1	11252.7	13695.5	10924.8	13392.8	27450.4	20517.3	17427	25157.9	18432.7	13015.7	15127.9	16632.8	21944.9	21418.2	25203.4	23277.9	20682.1	27435.4	18752.7	25320.8	13961.3
ANXA2 /// NHP2L1	3868.39	4081.51	4541.37	3659.75	4359.51	4447.53	4994.97	3516.59	3931.37	4137.48	4109.38	4978.19	3706.01	3824.67	4285.05	3896.96	3788.82	4352.14	3817.71	4070.22	3612.04	3096.78	3619.34	4343.82	3866.24	4150.86	4588.03	5570.6	4381.45	5005.4	4103.65	3707.84	5787.48	6041.1	5109.52	5597.19	5026.46	3995.78	4623.79	7035.78	7481.39	4942.65	5035.75	7519.02	6289.29	5090.2	5904.64	5164	6029.86
ANXA2P1	50.1002	28.0944	83.4994	38.4027	81.7797	88.811	92.3287	19.1884	65.8162	83.6689	130.487	154.195	54.9804	131.608	104.114	103.317	46.4245	54.0137	121.258	103.915	74.4112	30.7154	44.0534	126.403	110.604	64.8499	160.99	76.7234	96.7336	125.892	154.195	118.085	42.236	145.732	26.4806	119.05	26.4939	64.7391	79.2363	93.7828	95.4434	128.879	48.987	90.7608	89.621	88.7579	116.534	16.5311	55.1413
ANXA2P2	1845.66	2023.13	2821.62	1534.5	3005.71	2129.68	2253	3422.79	1030.98	5599.29	2163.57	1823.58	2400.49	3020.04	2997.4	1917.9	2119.81	2578.76	2329.04	1445.69	1975.86	2138.31	4771.14	3348.11	4648.83	3981.66	1965.7	3603.69	2026.61	4745.41	2244.71	3124.25	4142.12	2736.57	2277.41	3448.02	2705.69	3041.73	2833.59	2538.02	4353.2	3769.08	3682.24	2809.33	2410.76	4907.62	2929.96	3955.89	2606.01
ANXA2P3	224.893	210.982	184.137	222.616	206.686	24.6963	225.338	244.783	139.525	120.185	197.799	281.728	171.573	56.9119	256.876	226.998	41.5627	268.771	276.273	196.183	237.302	119.543	40.7773	379.042	244.974	228.33	470.506	276.52	281.187	235.157	37.0028	109.567	272.123	120.271	186.862	330.336	106.476	196.337	189.035	206.784	178.376	93.7042	285.622	156.379	249.211	270.658	141.293	316.817	78.4024
ANXA2R	1292.64	1313.29	1768.97	1708.4	1731.82	1312.58	1958.1	1158.24	1317.43	747.582	875.451	1172.91	1441.34	983.009	1039.37	1085.21	1079.75	1203.15	971.729	1439.12	841.433	719.356	470.168	358.442	686.248	910.843	1167.43	1057.63	1346	1400.14	963.763	785.57	1299.78	1570.56	2228.26	1686.49	576.692	965.836	1936.39	1455.55	1091.58	549.35	996.95	2063.42	969.218	922.905	926.615	1122.56	2291.94
ANXA3	172.243	82.6475	632.622	95.1634	79.127	59.4223	139.627	366.505	95.7745	352.766	148.308	234.352	50.9376	87.2952	270.95	337.617	256.925	88.8236	427.851	156.752	416.815	1648.98	1094.21	2337.09	1271.87	612.546	241.312	647.106	96.6655	535.155	283.525	1977.37	2503.64	531.216	1220.83	696.818	1064.45	2653.75	599.192	77.705	675.272	11511.1	919.966	3851.55	691.079	658.687	1185.64	1774.6	464.718
ANXA4	2579.28	2350.47	2177.8	1809.04	2138.33	1942.43	1802.14	2102.14	1710.01	2822.46	2449.33	3474.19	1696.4	2409.2	2522.06	1765.04	2064.49	2271.33	1924.17	2116.73	2100.89	1536.62	2277.27	2956.85	2530.08	2235.76	1929.9	3049.96	2462.97	2551.92	2770.96	3669.85	3832.3	3182.12	2654.35	3491.51	3477.19	3051.31	2356.28	2922.13	3565.23	4925.52	2777.71	3601.8	3292.68	3453.19	1951.32	3687.06	1597.97
ANXA5	8626.93	8670	5751.19	6689.18	5858.55	9133.93	6526.97	9575.19	7227.97	11141.8	11058.8	10609.5	7241.93	8534.83	6576.57	7263.84	7915.74	9621.92	9195.42	6546.02	9897.52	5420.97	13399.5	10073.6	11087.9	9432.7	9360.53	7222.97	9828.21	8943.55	8447.89	11729.4	9833.7	11016.5	8182.73	10178.5	13060.9	8957.65	6334.34	7844.3	10027.3	10548.3	8906.2	7473.39	7539.8	12561.3	6096.08	10352.2	7313.62
ANXA6	5662.57	7733.93	7505.43	5560.7	6423.82	6693.46	6979.94	6908.38	7244.24	5290.97	8269	8314.15	7002.13	8744.74	7577.61	5921.64	5464.26	5781.58	8265.37	8688.57	5455.36	5365.04	7389.68	5837.93	7488.58	5526.07	8300.81	6420.3	6896.65	6572.53	6505.88	8008.26	6253.9	8265.79	7824.28	7086.7	8758.62	6948.98	5817.58	7951.33	7277.04	5276.79	6012.08	10478.7	7748.34	6344.04	8013.72	7270.02	8928.49
ANXA7	3764.19	3449.89	3580.49	3889.09	3454.03	3852.63	3322.24	3450.35	3410.48	3589.88	4347.57	5228.14	4151.53	3253.34	3665.4	4171.33	3393.91	4305.54	4203.71	3794.02	3483.4	2790.57	4510.23	2366.08	4010.31	3274.13	3968.54	3536.63	4589.35	4504.36	4501.57	4015.93	2927.52	2202.37	2685.82	2244.89	4029.72	4017.77	2382.37	2024.83	2202.09	3320.89	2375.69	2470.03	2279	2735.45	1993.85	1885.46	2176.38
ANXA9	45.6902	39.3465	19.6662	48.9281	64.9007	64.5072	27.1167	86.9969	23.0653	70.5987	29.6487	24.436	14.6358	61.8252	19.6145	14.373	49.975	103.559	64.0766	19.3387	73.3774	63.4579	22.4578	70.4057	52.6871	34.1127	10.3231	14.5992	20.4007	76.922	60.6502	61.8478	22.0095	10.0057	11.0655	12.1797	37.1925	17.5661	10.1962	6.57971	13.4866	96.5013	44.4987	82.9605	43.0951	70.494	11.9933	28.9129	22.9727
AOAH	1523.59	1515.45	1010.36	1473.53	1126.95	1781.81	769.44	1480.27	1468.62	2320.14	1714.74	1370.41	1193.8	1409.33	987.285	1150.43	1351.14	1344.25	1760.4	1183.43	1840.85	696.759	1947.22	1602.62	1353.15	1447.61	1711.06	1403.67	1624.68	2158.93	2278.83	1974.46	2402.71	1998.48	1614.34	2468.18	2018.49	1376.09	1599.91	1326.61	1265.41	2378.18	2086.97	765.108	1215.2	1954.2	1427.08	2383.52	1506.05
AOC1	10.9269	16.7557	83.1379	60.4805	9.12921	9.92111	33.3394	7.83719	42.4601	35.4585	18.9933	65.6682	62.2002	15.4189	40.1747	48.2487	91.2361	144.518	80.0968	62.4666	145.013	109.907	81.1403	11.7194	88.7981	26.6583	213.49	90.6298	11.4754	48.9998	14.9402	189.002	99.8319	89.9934	191.116	26.061	168.332	51.466	29.0126	77.2797	26.8036	137.047	97.4466	8.08611	162.145	34.0204	81.0254	54.2495	51.4589
AOC2	111.113	169.368	135.842	98.5446	159.97	90.5325	156.682	208.472	108.77	144.54	107.965	91.2626	95.6341	219.969	139.188	132.902	179.773	262.766	142.55	139.398	142.452	394.692	108.208	113.224	123.412	101.369	163.439	156.637	126.779	167.43	154.677	141.304	127.311	94.9874	127.333	94.1349	100.063	190.806	179.594	126.68	62.336	147.351	137.538	123.175	139.786	72.5448	85.7138	112.266	142.886
AOC3	26.5627	69.2652	37.4357	80.8	61.7133	67.829	40.2564	94.4077	73.5961	118.567	58.8611	16.8801	41.6901	71.6369	117.256	162.653	90.633	70.3526	82.5546	69.6571	214.145	359.659	42.8743	130.224	92.8812	85.7601	126.761	99.1788	74.6641	113.948	75.1534	181.495	81.136	60.4369	88.6742	7.35517	107.759	153.309	165.049	48.2571	70.1634	110.273	14.2112	109.622	79.1548	50.9656	88.2123	105.416	77.3499
AOC4P	51.7708	27.8074	127.205	61.954	89.5118	50.311	37.8029	46.5015	47.1607	43.0346	55.1036	37.9587	46.397	187.61	85.2639	130.17	52.5229	49.9197	39.0223	52.7103	155.3	41.2294	174.016	42.6909	49.4569	58.7839	48.1046	74.0015	51.996	46.4736	153.046	47.6217	223.746	132.195	51.2581	25.0145	102.857	67.4661	57.6375	29.986	70.4479	40.1749	57.7089	64.2682	69.9657	63.7907	47.3725	67.9833	50.8356
AOX1	58.6764	108.473	62.6261	60.8885	61.3435	67.9087	21.9769	61.7736	101.579	27.8216	107.963	18.3827	145.274	91.6013	83.4803	123.626	90.3613	120.191	55.0286	128.375	103.702	4.52427	71.2112	85.4024	17.4115	17.9927	75.4854	86.4599	48.0935	23.707	56.3037	34.5752	17.0416	2.69797	51.1458	24.7941	76.8718	92.7276	17.2075	32.5349	47.7177	92.7944	53.2846	29.9928	106.245	7.09125	73.7715	68.9022	59.4208
AOX2P	59.5614	14.7229	86.82	18.8054	98.8739	19.8875	17.4286	19.0113	25.1928	19.0899	21.5632	32.3409	21.0147	48.7498	19.4723	32.7141	40.6429	46.9202	66.6482	23.6967	26.4323	24.6366	35.8048	19.4237	19.1465	99.3065	63.7753	27.3325	44.6698	15.8897	35.7486	30.0797	36.4383	29.6583	130.676	76.0789	68.5022	87.3146	35.4053	30.1411	8.66778	101.979	19.4108	30.0664	54.7531	21.8447	19.0002	19.623	79.4558
AP000525.9	139.617	234.843	155.408	100.438	130.415	141.85	128.361	84.1918	193.214	94.3538	197.194	240.45	189.79	134.29	97.3407	183.206	150.673	186.667	28.3004	270.679	165.57	134.242	133.477	213.923	198.371	197.691	183.74	169.594	167.43	137.003	156.492	168.851	28.6362	21.5618	127.122	136.918	141.256	139.854	176.524	194.93	36.0747	199.079	75.3411	196.868	72.2123	45.8231	293.127	129.809	83.0433
AP006222.2	240.994	288.415	163.238	204.988	172.813	127.709	197.974	167.654	318.488	206.392	198.208	203.767	242.631	276.772	226.558	245.713	337.916	195.71	220.302	343.025	307.237	441.469	240.679	299.496	234.79	363.458	284.638	118.722	181.38	270.633	239.942	255.45	397.247	260.792	209.047	218.114	261.04	249.659	275.17	338.159	150.808	196.834	215.453	162.545	426.563	209.139	231.288	248.12	111.221
AP1AR	688.74	804.482	681.832	654.901	825.95	606.658	729.346	571.506	774.413	584.938	542.301	692.214	676.676	683.86	586.021	676.608	674.084	568.838	519.332	704.977	569.713	443.656	566.352	674.655	634.86	567.816	507.804	497.043	711.956	724.801	782.54	347.685	343.102	369.965	378.35	342.257	573.63	411.848	334.065	361.348	279.902	317.213	328.537	409.803	336.169	422.608	271.211	279.064	276.787
AP1B1	937.018	1035.31	773.211	864.673	985.723	843.34	787.174	835.781	924.993	937.163	1064.31	941.66	547.414	892.855	728.073	886.311	878.441	650.051	1110.5	733.806	1137.99	593.084	1614.37	1324.71	1256.66	1209.61	848.284	933.587	1020.62	1112.28	1015.26	984.651	1354.4	1536.4	888.938	878.912	1075.65	1053.9	701.322	600.698	1012.19	1667.7	1484.01	891.11	971.549	1351.29	1177.01	1698.72	936.926
AP1G1	1327.03	1217.09	1170.45	1110.6	1071.56	1128.85	1176.48	1060.82	1188.29	1119.72	1347.44	645.412	1331.56	1581.78	1250.07	1248.56	1402.6	1089.61	1471.73	1253.45	1301.27	1170.98	1246.58	1439.77	1315.66	1316.1	1145.2	964.009	1217.37	1212.01	1056.02	1055.18	1419.7	1023.31	1407.77	1370.62	1364.64	1171.43	1374.67	1327.92	1289.44	1255.66	1475.75	1027.23	1171.76	1632.86	1495.66	1796.54	1443.25
AP1G2	1520.4	1432.91	1723.72	1521.02	2089.77	1316.62	1611.28	1995.11	1592.06	1310.06	1724.23	1163.32	2030.09	1528.32	2060.37	1253.84	1475.69	2032.99	1614.6	1711.11	1395.35	1350.78	1473.76	1542.83	1763.55	1812.86	1644.97	1535.17	1383.95	1681.41	1553.6	994.567	1049.06	1364.64	1385.07	1761.22	1318.55	1962.67	1749.31	1861.94	1316.15	1455.81	1527.96	2415.5	2301.01	1338.67	1657.56	1276.01	2038.52
AP1G2 /// JPH4	164.461	98.7652	78.7159	99.1619	92.9954	153.321	52.3446	124.936	92.9191	77.5432	173.034	129.059	81.6196	142.653	173.454	128.09	87.2896	132.484	103.618	148.469	135.219	90.9979	49.5782	251.022	127.219	149.353	125.228	110.434	113.383	106.138	140.396	171.488	195.395	154.492	71.657	200.413	135.384	138.24	87.464	158.425	243.986	115.335	193.492	216.04	138.746	78.9589	103.959	144.277	43.7538
AP1M1	3900.89	3529.62	3344.11	3526.69	3616.27	3560.09	4117.15	3850.83	3807.27	4156.66	4021.56	3910.45	3397.66	3052.21	3854.29	3816.33	4039.16	3608.57	4634.71	3779.47	3663.79	3028.4	5024.71	3870.97	4581.77	3947.12	3811.57	3071.13	4062.6	4342.18	4127.76	3548.86	2584.47	3433.56	3140.28	3404.13	3522.25	3256.05	2948.41	2705.22	2798.7	3469.87	3399.94	2425.88	2927.61	3453.89	2862.89	2833.09	2614.8
AP1M2	56.8368	83.5945	43.4182	114.433	63.4232	57.6411	132.231	29.067	28.1527	90.1609	30.5785	50.1932	68.9588	138.411	31.1833	185.326	194.901	71.6417	171.338	30.2331	151.167	56.5906	303.051	181.361	76.7076	57.5323	66.9392	163.469	70.9991	88.5486	112.478	222.305	63.4432	136.132	19.6433	121.309	60.9419	216.337	127.824	61.9356	99.455	135.325	116.247	272.23	241.941	81.8439	165.67	203.787	182.567
AP1S1	485.129	563.734	558.866	641.852	533.327	464.47	524.296	351.539	511.47	467.302	518.646	562.306	450.485	478.327	464.589	476.494	676.411	505.754	415.503	522.595	394.274	616.731	582.189	638.562	638.537	606.774	578.129	404.992	393.112	628.988	302.472	294.956	544.76	325.888	334.367	297.431	643.632	635.023	399.785	452.967	437.521	289.777	318.311	384.528	510.921	325.357	504.092	547.018	324.534
AP1S2	12122.7	12709.7	7641.47	11462.5	9327.21	12649.6	8441.71	13932.1	10906.6	16221.1	14640	15783.4	10185	11617.8	11664.2	9059.82	12943.4	9930.1	11601.2	9204.78	15075.8	5952.91	11386.2	13441.1	15270.3	8812.13	9884.03	9105.41	12543.1	17302	14557.4	12871.4	24097.8	19586.7	16465.7	23439.7	17830.9	10912.8	15060.8	12044.2	13250.6	17691.9	21879.8	12082	15530.5	26073.2	13080.3	19810.7	17968.7
AP1S3	34.7296	124.923	34.9864	65.2756	64.9792	36.9595	73.0757	53.2431	69.6602	51.7977	61.5723	50.38	98.0451	98.4756	32.2981	35.7403	55.4833	35.9655	5.52249	87.028	56.2511	64.6723	8.36946	28.6026	45.9865	54.2981	70.4287	69.0324	77.9197	50.8932	35.0469	13.685	69.2912	27.8994	62.0197	39.7845	13.7134	62.0159	69.2969	61.6406	27.3212	27.3635	76.8252	74.285	103.615	56.9343	64.4277	70.3904	66.5624
AP2A1	367.094	532.713	305.117	398.345	442.17	407.67	252.616	567.367	390.126	552.531	510.175	299.524	348.36	488.639	335.634	509.149	399.912	413.389	407.641	444.321	502.372	282.36	456.679	290.276	297.774	431.988	438.499	359.385	446.248	370.31	563.139	496.493	381.073	364.628	222.408	440.556	303.062	184.268	424.533	214.078	453.474	439.211	276.956	155.257	255.086	378.84	375.873	528.267	387.918
AP2A2	1545.07	1545.88	1546.59	1452.44	1423.31	1633.58	1662.47	1350.01	1474.59	1538.15	1523.76	1285.15	1545.47	1541.4	1406.66	1354.65	1365.1	1431.99	1655	1449.48	1547.82	1298.65	1880.21	1762.87	1885.4	1695.02	1325.91	1276.84	1396.94	1713.69	1425.71	1389.59	2192.93	2334.02	1923.73	2009.77	1701	1778.78	1778.23	1757.78	1751	2194.74	2119.17	1720.12	1938.92	2216.18	1669.21	2461.26	2116.51
AP2B1	2177.31	2115.91	2340.25	2338.81	2026.4	1736.65	2326.78	2003.48	2087.4	2105.93	1933.65	2176.83	2021.14	2060.71	1434.26	1447.21	2181.07	2079.36	1810.55	891.123	1912.99	1723.89	2022.89	2156.47	2035.67	1867.53	1728.56	1572.9	2124.26	1857.37	1782.09	2141.39	1676.44	2106.22	1804.13	1884.35	2660.19	2268.38	1888.84	1918.55	1828.58	1399.27	1571.83	2350.82	2128.94	1653.45	2153.34	1990.25	2257.46
AP2M1	3535.46	4339.04	4359.85	4232.43	3669.5	4702.21	3599.62	3621.38	4261.8	5127.3	4070.14	4473.78	3330.18	3856.95	3495.82	3709.25	3627.72	3667.98	4131.84	2843.74	3650.2	2746.5	4453.15	4795.47	3568.08	3960.04	5210.67	3412.78	4310.82	4367.07	4364.78	3876.23	5939.43	6133.22	4187.05	4217.98	3133.05	4143.55	4660.07	4201.93	3822.99	5268.52	5254.71	3515.38	4442.73	5714.74	4965.9	3897.48	3778.6
AP2S1	4962.32	6300.37	5547.47	4953.3	4945.34	5984.8	4457.68	5601.96	5269.69	7968.54	6272.89	7242.2	3623.31	5369	4543.22	4041.26	5123.61	5376.78	6190.19	4682.13	6147.74	3350.41	8954.86	7511.13	5680.07	5721.47	6016.75	5843.17	6235.39	7257.36	6327.31	7055.74	12083.7	8613.6	6477.61	8846.46	7985.18	6394.01	7244.97	5993.8	7108.18	9137.29	10054.9	6137.39	6362.07	9990.99	7422.02	10338.3	6172.86
AP3B1	1064.23	1692.1	1238.9	1189.31	1360.98	1445.82	1202.77	1058	1179.48	1453.15	1607.5	1728.65	1586.59	1292.44	1312.73	1096.01	1258.06	1192.83	1431.68	1134.08	1250.53	1330.3	1418.85	1186.39	1308.32	1430.42	1673.19	1245.59	1303.05	1550.54	1363.94	1175.54	1211.73	1403.41	1348.01	1059.54	1306.69	1246.18	1320.61	1240.05	1409.19	1288.69	1469.28	1335.02	1297.08	1475.23	1246.09	1339.53	1296.22
AP3B2	45.502	86.5897	73.3334	80.6763	93.1328	56.9982	70.7979	44.7459	117.272	29.6989	82.1608	126.472	134.438	107.384	86.1552	140.732	126.025	153.023	116.489	136.752	85.8616	51.0226	76.8427	481.489	7.83788	78.6576	131.244	174.018	45.9683	79.1133	79.648	100.084	95.7344	15.8659	59.0161	68.5577	77.219	111.426	37.4329	65.739	55.0809	26.5619	32.7716	89.6872	104.766	86.3358	74.3763	199.051	83.4369
AP3D1	2550.5	2637.96	2424.31	2787.63	2328.11	2925.73	2441.99	2357.18	2295.26	2364.73	2451.02	1988.63	2316.86	2096.05	2224.01	2606.15	2093.68	2227.63	2827.32	2391.19	2589.04	2362.24	2626.22	2319.52	2749.74	2920.27	2305.95	2181.28	2590.44	2469.59	2286.17	2561.86	3511.05	4051.12	3214.12	2864.96	2312.63	2238.27	2830.59	3403.83	3652.91	3361.9	3318.84	2779.69	4174.47	3630.24	4006.98	2784.32	3063.48
AP3M1	1635.38	1755.23	1703.27	1524.57	1691.55	1899.9	1844.94	1757.4	1685.04	1735.7	1797.35	1811.14	1667.7	2079.43	1832.07	1897.21	1622.5	1485.16	1686.28	1761.08	1601.18	1226.26	1641.49	2024.46	1938.98	1875.07	1336.56	1748.78	1797.71	1855.64	1759.52	1812.4	2079.03	1423.23	1999.59	2434.83	2230.11	1210.94	1959.76	1985.79	1869.67	2064.32	1854.32	2037.66	2024.28	2246.06	1692.93	2168.89	2101.2
AP3M2	834.077	578.914	745.654	870.416	806.749	583.491	834.12	722.534	449.981	660.808	725.454	372.009	962.22	545.14	694.055	844.001	637.752	1004.64	756.548	770.497	668.327	820.793	297.644	502.649	677.009	456.837	761.126	456.184	750.688	754.777	826.602	351.359	480.485	730.848	764.884	675.522	1024.78	598.937	782.191	805.201	627.124	368.42	400.16	1590.62	1207.07	402.164	520.256	653.96	1218.49
AP3S1	5348.39	5892.74	5241.63	4939.69	5379.31	5557.9	4878.55	5355.53	4608.35	5691.03	5856.95	6402.48	4774.47	5041.51	4460.17	4588.24	4364.89	5964.15	5695.29	4684.25	5153.22	4968.12	7396.84	7228.82	6913.74	5573.17	6338.27	6064.41	5928.14	6386.67	5859.27	6925.85	4947.86	4161.85	4086.19	3937.73	5795.2	6268.91	3897.36	3368.37	4032.8	8267.17	3828.53	4354.01	3530.66	4563.33	3631.64	4551.96	3499.15
AP4B1	1405.19	1140.63	1355.54	1427.92	1440.92	1279.27	1479.64	1365.65	1384.15	1275.55	1182.74	716.224	1384.57	1355.83	1341.54	1515.34	1246.85	1216.89	1070.66	1418.21	1117.3	1227.51	1129.84	1157.57	1528.35	1355.85	1133.47	1351.58	1289.44	1047.75	1230	868.986	1184.45	1352.71	1443.4	1699.68	1060.73	1027.82	1307.52	1776.47	1838.27	1444.05	1156.43	1608.41	1718.73	1741.31	1651.79	1760.96	1728.85
AP4E1	663.837	670.679	707.184	675.792	702.366	575.984	658.481	524.087	611.617	603.8	717.63	776.118	749.161	749.799	702.638	733.561	713.391	534.229	759.42	723.592	600.427	478.569	605.735	779.305	682.246	796.214	715.152	690.666	637.547	729.882	681.058	724.863	620.564	465.998	568.53	496.802	557.823	563.355	581.013	566.641	566.579	549.682	480.892	523.39	612.023	550.927	512.619	628.399	526.623
AP4M1	177.707	105.934	98.4286	171.21	150.887	120.035	106.091	187.728	161.313	151.127	191.202	57.2065	110.629	116.476	32.0237	127.342	182.947	155.836	131.245	142.376	178.248	43.2185	92.7174	129.1	85.6209	52.555	129.576	80.354	199.563	160.634	215.719	137.728	204.916	256.53	177.548	215.885	48.7452	85.5201	154.885	119.207	143.532	207.12	239.574	42.105	190.17	225.859	224.82	284.548	214.975
AP4S1	264.785	289.295	383.7	259.574	291.781	366.302	422.004	315.223	256.526	274.177	220.998	299.869	365.369	322.477	238.601	270.757	337.353	126.455	146.786	364.785	202.057	167.448	214.556	197.965	220.709	246	155.878	403.18	312.848	340.617	345.963	263.43	259.651	269.909	432.561	283.688	322.607	131.667	332.007	327.314	285.49	184.7	142.189	362.339	240.782	247.065	199.064	158.264	629.451
AP5B1	762.69	575.761	419.511	657.688	757.53	595.713	456.095	701.77	725.51	741.143	624.732	636.818	600.575	735.885	580.882	713.342	806.971	663.948	783.431	521.883	780.242	1634.57	892.044	1114.66	794.13	868.634	680.131	866.068	667.698	808.608	741.208	905.375	1353.96	1284.9	1323.23	1274.34	964.729	835.982	1343.88	946.632	783.521	1010.19	1111.25	916.563	876.595	832.857	1204.61	1297.98	796.335
AP5M1	2363.23	2316.98	2235.27	2391.24	2463.28	2506.19	2184.31	2538.95	2175.07	1969.79	2103.22	2434.46	2382.4	2582.23	2161.8	2415.44	2100.94	1680.19	2419.37	2415.98	2156.12	2133.71	2052.89	2344.55	2317.82	1644.07	1440.04	2498.64	2694.18	2420.47	2389.28	2594.63	1646.8	1309.61	1968.72	1998.82	2417.17	1536.49	1813.83	1875.59	1349.59	1978.26	1721.5	1802.64	1713.4	2312.41	1507.46	1614.59	1706.61
AP5S1	434.531	627.565	467.208	422.101	609.246	448.006	463.784	454.685	564.002	553.016	399.41	483.706	278.497	554.088	443.635	456.614	593.793	493.117	483.324	531.642	606.75	522.282	584.04	550.748	509.808	668.865	271.22	503.074	443.374	522.254	399.744	438.436	823.738	652.124	638.198	705.728	730.658	634.434	762.203	800.852	664.284	582.934	657.469	751.034	651.936	707.785	841.229	758.62	722.051
AP5Z1 /// MIR4656	247.374	368.463	203.621	326.286	314.058	223.104	228.549	303.515	275.874	267.632	330.39	262.822	427.383	360.191	411.674	507.882	277.405	321.062	343.626	337.813	308.093	309.014	188.2	232.597	196.809	183.938	330.917	226.915	162.451	158.066	192.78	208.329	291.919	270.14	210.3	255.841	263.434	255.277	254.131	503.06	307.842	494.515	297.014	258.178	237.592	211.217	372.545	470.222	340.74
APAF1	1583.24	1603.2	1429.28	1724.98	1649.17	1856.74	1338.44	2239.46	1813.44	2242.77	2233.74	1379.67	1879.68	2266.29	1751.83	2210.46	1891.38	1386.71	2405.78	1795.35	2559.2	3244.54	2815.51	4009.74	3363.6	2500.69	1235.25	1891.39	2291.47	2780.44	3048.17	3012.04	1235.33	714.625	1148.04	1033.86	2563.76	1885.17	1377.87	703.449	1042.15	2427.41	1806.84	945.843	1149.4	2120.26	1008.96	1759.07	719.018
APBA1	64.5114	41.8608	83.8523	105.337	77.0372	61.4757	76.6148	65.2634	112.428	135.776	58.2632	13.4648	160.402	97.8829	88.4888	96.7751	82.0395	99.5822	97.5823	114.267	101.402	47.6259	94.1964	84.1244	53.936	59.5491	102.779	12.7157	112.314	73.9828	64.34	36.8759	108.195	82.5621	18.3263	60.5446	56.3857	35.4466	80.8435	55.8913	15.864	68.794	119.243	67.0076	25.721	89.6592	17.0309	12.251	10.8038
APBA2	620.51	827.059	802.886	1109.35	1092.44	850.959	911.787	534.414	871.754	478.544	560.128	784.858	786.94	633.279	860.808	581.203	563.215	779.031	804.159	1036.18	559.615	683.938	712.295	459.927	395.756	1308.98	616.718	1222.96	765.618	850.467	591.908	752.598	398.737	535.624	791.259	968.439	721.631	1196.83	734.366	1214.92	886.457	242.865	654.492	920.987	813.621	688.229	1243.09	812.296	1104.58
APBA3	1132.05	908.031	1399.52	1298.78	1199.09	1179.48	1570.92	1256.12	1287.87	602.748	1010.81	961.79	1141.16	944.762	892.618	1242.84	1018.5	898.674	1149.52	1099.35	1080.78	1673.54	959.71	1036.13	1605.37	1194.82	1106.59	1346.14	1063.38	1282.49	1164.54	1005.05	954.075	1758.64	1114.37	1153.93	1102.68	1284.59	1134.57	1322.97	958.554	872.56	867.661	1291.58	1481.64	948.26	1619.2	1540.09	1151.85
APBB1	275.083	177.88	507.068	474.127	492.327	172.652	559.523	224.831	329.645	202.54	134.669	438.364	379.409	529.646	613.888	179.28	232.952	391.561	285.833	339.955	262.414	165.227	122.5	107.447	94.5852	207.269	327.496	244.07	319.219	381.008	268.807	212.533	81.3001	127.224	210.571	162.736	170.279	248.723	358.913	228.805	50.7509	36.5907	148.106	461.245	187.746	66.6736	261.895	67.8131	461.368
APBB1IP	6689.07	6839.74	5428.25	5572.15	7087.95	6259.85	6272.76	7303.99	6623.75	6746.98	8196.2	6248.48	6345.51	7745.94	7180.52	7691.65	6798.54	5753.33	8201.12	6605.53	7127.52	13474.1	10263.5	8356.78	7500.73	9938.53	7309.91	7028.9	6122.97	7920.26	6713.77	7828.34	19911.6	13305	14589	15835.4	9571.11	11299.8	13076.9	11245.2	11669.9	14335	18015.8	13813.9	12166.7	15837.1	11790.7	13564.4	12348.6
APBB2	203.903	93.5973	189.576	91.3408	147.352	183.6	76.7199	127.481	156	203.25	213.589	220.119	526.304	310.046	222.778	268.353	246.722	218.726	190.293	212.01	200.614	142.044	219.45	133.689	268.686	190.379	120.623	223.721	147.095	165.596	165.846	125.017	160.487	167.072	232.603	211.472	144.884	234.411	186.167	277.28	280.165	245.243	219.248	177.392	284.633	125.478	222.848	150.121	257.84
APBB3 /// MIR6831	638.767	554.285	683.685	507.308	639.012	452.066	508.216	427.854	512.87	508.704	850.488	367.532	535.62	497.189	671.537	577.9	464.331	607.884	562.876	432.671	518.355	647.516	494.905	588.991	553.255	555.323	381.852	547.776	613.878	402.795	468.638	495.817	399.709	509.294	405.902	436.205	319.966	451.358	472.358	659.169	447.842	341.243	364.94	304.045	586.191	448.988	449.9	398.407	397.945
APC	519.023	310.342	483.145	536.864	335.186	447.057	480.488	650.484	501.2	479.989	401.105	141.397	350.257	418.295	326.884	549.165	374.619	359.36	314.893	325.609	526.008	528.714	374.869	308.735	338.284	309.581	432.518	119.189	188.103	178.353	179.627	207.46	181.605	205.147	154.959	160.344	321.996	351.548	364.333	281.442	158.376	290.873	328.993	150.858	178.134	195.669	242.051	243.177	215.464
APC2	158.133	35.1401	92.8869	34.0146	192.481	155.393	99.6853	93.4341	91.2476	98.8732	151.218	124.987	169.954	131.407	120.744	80.4239	115.963	169.727	142.037	95.5675	38.251	45.7704	76.7514	144.012	123.684	111.255	101.641	139.164	100.673	121.943	148.075	120.806	152.885	144.063	221.588	65.0491	78.8758	20.1353	165.76	160.887	108.998	135.138	150.558	149.087	174.28	19.6029	171.745	60.3336	135.035
APCDD1	177.714	120.973	63.3444	95.7333	75.6987	123.719	93.319	74.6249	83.2512	77.4549	69.2902	84.5086	45.8518	78.0067	47.3545	85.0134	88.4469	166.875	77.6341	61.1504	69.7104	100.377	304.052	289.831	74.7631	390.436	175.238	26.0264	101.759	119.798	167.617	79.3001	289.983	114.471	103.547	116.847	93.6284	34.0722	60.1733	117.682	42.8175	128.604	153.041	59.4105	222.8	162.692	159.897	435.383	31.8349
APCDD1 /// LOC100130468	82.2597	41.446	41.2051	57.9127	57.368	43.8248	45.4085	38.9646	42.9901	51.8428	25.3393	67.5903	48.6171	80.743	70.488	63.2781	68.4894	48.075	72.429	24.1153	46.033	55.0081	24.0608	36.4901	33.8755	30.4591	34.4434	58.4691	91.3208	34.6674	38.3192	69.6176	74.1389	32.2533	4.39549	36.7918	57.8712	98.9534	78.1503	52.4644	25.016	44.7887	19.7806	71.4402	61.2322	45.2257	70.3266	66.6997	42.7472
APCDD1L	10.9966	6.79514	15.6386	6.88382	8.75199	11.6415	9.26507	4.43618	8.93152	11.0166	17.9027	7.52658	11.1887	12.1821	8.95193	12.8121	13.4287	16.7743	28.944	11.599	9.79763	16.8856	14.6801	9.97096	18.9455	5.77474	16.9133	13.7434	7.76804	9.28567	7.45627	9.63082	21.6936	25.5215	7.00209	17.4342	11.2933	8.28792	19.2425	18.3149	6.73304	7.43539	12.889	96.6023	11.877	12.0178	23.9839	16.4534	7.14812
APCDD1L-AS1	69.7081	272.333	108.615	241.383	72.3147	122.63	171.626	66.5045	166.941	119.25	76.5357	107.951	93.2063	61.4476	85.4714	107.957	80.1752	161.303	299.21	232.357	336.611	86.4822	150.107	341.938	70.2254	107.871	61.6156	197.749	180.266	78.415	85.8306	73.5551	219.227	101.56	113.248	252.31	73.8832	96.2273	109.57	85.5859	105.22	82.4113	172.495	107.604	207.135	136.635	92.7229	115.768	95.1372
APCS	107.414	96.1599	60.129	140.22	149.008	79.9506	96.9119	112.147	95.5049	128.885	129.568	28.4237	110.736	105.547	195.675	137.113	188.968	36.8937	42.3472	239.27	172.741	100.775	134.598	29.6954	144.293	135.425	123.929	141.606	76.7704	175.048	206.302	169.713	107.051	108.019	55.5261	90.2809	95.2788	144.239	211.033	62.6481	87.3451	172.22	109.873	17.4135	90.2224	112.407	168.771	75.8791	127.002
APEH	1324.69	1369.18	1764.8	1618.43	1528.1	1704.19	1521.27	1247.82	1501.81	1330.32	1286.72	1700.93	1635.69	1437.24	1808.13	1356.25	1563.1	1597.41	1347.16	1362.03	1265.83	1092.44	1516.28	1376.41	1264.22	1549.71	1350.1	1673.7	1869.98	1646.09	1717.75	1232.79	1413.96	1153.84	1223.46	1303.39	1413.25	1385.22	1121.32	1154.33	1446.9	1476.23	1245.09	1260.35	1424.41	1430.22	1156.27	1436.65	1355.73
APELA	27.7803	10.6492	5.87182	10.5518	1.65295	6.65193	6.15171	3.97485	1.98389	2.66306	3.96085	4.7179	3.0847	24.1221	6.76605	6.70815	16.3168	3.39432	3.20701	5.66778	2.07882	2.82044	3.74046	2.80987	1.04498	7.10253	6.7254	18.6123	15.3163	4.33026	10.7999	6.51432	4.15578	2.74501	29.71	4.07149	1.42036	7.45176	10.4391	26.3289	7.56171	4.93602	42.712	11.0458	31.4584	6.61694	26.7977	2.35043	8.41654
APEX1	4479.28	5192.15	5680.64	4521.71	5447.49	5288.83	6126.96	4106.82	4705.11	3577.66	4506.39	6631.26	4349.28	4478.6	4910.09	4460.22	4357.88	4212.93	5287.55	5303.87	4340.59	3417.24	4751.77	4619.18	5135.98	4584.42	4801.89	4001.7	5221.85	5605.51	4319.02	3098.7	7468.25	5331.1	8378.01	6130.5	5019.22	4493.88	6362.72	5439.98	4827	5223.81	6680.9	7377.39	5255.87	8154.38	4668.15	5538.37	9845.94
APEX2	380.453	367.528	360.47	740.212	311.99	550.547	452.299	618.051	689.149	405.864	345.499	635.29	637.913	535.119	585.104	606.12	640.898	307.847	702.154	523.362	682.208	368.762	425.157	389.171	511.645	317.25	607.15	603.308	569.837	534.386	547.318	336.193	546.94	707.311	459.493	468.383	435.047	418.848	380.193	619.571	540.788	587.989	517.664	402.974	565.288	402.67	634.996	506.744	636.862
APH1A	3338.57	3094.55	3405.47	3092	3220.96	3496.84	3156.12	2778.45	3129.2	3363.18	4095.75	3974.92	3287.71	3595.24	4517.01	3078.15	2965.22	3413.54	3990.17	3932.93	3585.33	2555.71	3939.07	2676.3	3387.54	2805.06	3643.37	2572.95	2665.12	3243.35	2291.81	3324.58	2755.84	3078.11	2509.89	2860.78	2498.37	2331.69	2482.39	2221.54	2123.99	2511.81	2750.68	2909.76	2531.24	2839.58	2459.11	2258.4	2000.51
APH1B	1051.59	754.923	524.868	574.319	549.61	829.319	635.82	780.705	600.049	936.492	838.936	935.975	676.777	686.156	399.118	726.048	810.267	665.896	722.593	449.2	704.737	571.76	1111.43	827.315	629.638	933.403	722.434	895.646	689.357	1052.08	1097.23	1061.77	1700.71	992.153	665.741	1128.91	962.511	1011.12	772.627	944.925	681.741	1661.76	1353.09	957.907	762.644	1291.3	788.604	1248.16	615.731
API5	2643.47	2460.07	2856.52	3205.82	2718.5	2365.3	2753.44	2431.49	2436.24	2294.73	2632.32	3623.58	2963.9	2981.48	2792.61	2975.97	2986.67	2494.04	2758.77	3162.19	2141.25	2010.5	2472.51	2467.59	2625.17	2101.8	2422.07	2575.37	3453.95	3133.69	2961.82	2492.18	2263.52	2274.76	2360.41	2312.77	2252.46	1803.5	2139.67	2323.04	2301.27	2218.41	2129.91	2458.51	2284.79	2588.72	2105.27	1877.74	2106.69
APIP	1551.26	1351.36	1136.63	1258.5	1011.71	1548.28	1441.52	1164.91	1392.98	1035.27	1573.82	1471.11	1342.72	1221.67	1179.09	1279.21	1404.6	1364.47	1470.93	1179.55	1546.09	1057.11	1618.51	1753.74	1392.91	1522.96	1059.34	1206.09	1585.17	1697.87	1856.95	1576.41	2040	1600.4	1749.04	1639.11	1514.41	1261.55	806.931	1014.73	1169.02	1937.28	1486.84	1717.8	1588.76	1515.97	1343.73	2339.87	1130.93
APLF	82.4699	137.397	80.5527	70.5542	56.7341	72.2184	75.7449	64.8736	101.404	79.9449	146.097	116.127	174.854	150.133	184.157	117.707	172.16	160.973	168.604	146.548	119.699	94.5022	83.2572	53.9058	138.549	101.401	153.124	123.385	107.818	93.5461	80.7356	104.633	81.0596	36.1881	92.3028	114.393	109.569	165.544	103.769	30.6364	14.816	84.2414	96.0008	78.3254	123.314	131.664	126.213	114.862	123.278
APLN	95.87	32.2903	86.1838	66.2559	36.236	26.9945	21.4224	27.9735	123.378	109.377	194.141	65.8547	187.172	26.9311	127.3	101.616	161.6	43.6887	103.262	65.1149	108.744	138.508	104.805	13.5987	55.1956	36.2422	60.8727	92.6663	85.1513	154.827	40.6243	40.2832	166.374	53.2013	29.7068	104.707	25.5745	112.557	39.7722	133.114	95.5705	98.2835	105.703	31.6092	186.766	42.1192	30.4933	109.733	169.951
APLNR	12.9075	28.3067	20.4145	29.5973	21.8924	14.106	15.5309	30.057	22.1637	25.3209	10.7802	60.4631	17.7831	18.2144	16.5216	19.5498	17.1231	32.2184	16.1092	12.6759	64.5332	36.3579	23.2477	38.9273	13.0671	26.3768	8.9712	41.8763	42.3449	27.171	19.929	26.8699	20.8016	9.62769	20.9059	38.5866	20.213	18.224	15.918	18.7906	13.4081	13.6168	14.9816	11.6397	16.8699	11.9758	12.1002	22.9016	18.2838
APLP1	7.66717	16.1862	9.11604	10.2957	9.63391	7.25228	15.5943	6.73053	12.6555	13.5527	7.83658	8.97699	12.3816	22.7686	11.758	12.3042	8.19658	22.9859	21.2521	7.4276	12.0055	14.0614	11.4328	12.3485	20.2095	10.7055	9.16561	16.8306	13.3083	21.4006	8.84305	6.28507	8.49178	11.6542	7.56035	6.5973	12.8936	15.0806	17.2699	18.1592	22.2884	17.4925	13.4466	8.87062	11.8232	25.5048	8.22905	11.9565	9.4178
APLP2	9465.58	9117.59	6426.15	8291.42	8462.76	10871	7251.98	7905.35	7886.64	11204.2	11755.6	11945	6192.44	8461.74	8339.61	7353.96	8587.18	9200.25	11919.9	5750.89	12171.6	8241.04	17093.5	11446.6	11915.2	11161.9	12482.9	7407.66	9235.15	11070	9523.87	10757	10268.9	9921.37	7698.87	10454.4	12786.8	6688.48	8624.76	6211.42	7500.82	10916.7	13849.3	5272.47	8534.51	12381.8	7777.53	10313.7	5608.03
APMAP	4318.87	4244.72	3572.64	3247.35	3642.68	3330.4	3229.58	3888	3003.47	3240.41	3442.88	6171.62	3622.91	4706.52	3721.22	4364.2	2655.15	3622.46	3913.09	3915.01	3768.64	3511.85	4624.1	4250.85	3680.38	3347.02	4698.4	3880.49	3747.55	3876.33	3375.64	5183.32	3629.9	3335.66	5231.32	3020.44	3296.01	4022.53	3236.84	3219.14	2797.42	9446.99	4513.95	4416.76	3478.66	4609.81	5943.65	5541.21	2752.96
APOA1	69.4808	15.4701	35.9264	12.9167	125.436	56.702	96.7389	77.6545	13.9691	42.9918	81.2217	28.9851	72.3781	15.887	45.2654	77.667	76.7509	48.4444	106.154	49.2509	30.2206	108.632	70.4177	48.9477	39.7685	79.7475	112.452	56.9522	95.607	92.5632	53.4522	68.1402	38.6698	225.668	92.9086	97.3763	17.1361	69.3919	127.442	88.0986	46.3584	30.8123	41.1579	41.5057	122.772	67.9562	105.416	152.429	108.025
APOA1BP	929.839	1475.83	1257.32	1396.12	1117	1420.92	1525.24	1158.09	1330.04	1246.51	1321.74	1359.36	1116.57	995.343	1362.76	1009.23	939.101	1349.8	904.3	1301.8	1274.42	1120.11	1463.92	1263.52	1763.89	1515.43	1085.96	1417.04	1610.42	1393.82	1386.42	1175.26	1664.37	1661.57	1685.59	1589.54	1189.11	1738.34	1339.5	1826.43	1861.24	1396.74	1899.95	1710.69	1884.12	1747.53	2009.48	1517.5	1457.17
APOA2	226.13	56.7603	8.44395	69.5855	104.477	49.0824	21.9253	34.9124	77.3637	62.6048	95.6209	13.5646	89.707	78.064	17.6739	67.0506	86.6462	97.0152	9.79127	59.6369	156.257	71.9823	63.7137	87.0784	60.1543	145.513	104.689	115.77	76.9047	11.1136	140.81	24.2299	235.787	219.383	220.637	310.522	330.93	441.682	65.9119	185.438	181.52	282.836	360.965	79.6761	90.2686	113.051	484.058	222.548	66.2681
APOA4	35.6154	27.1376	11.0137	17.2285	23.0411	74.3502	5.7617	41.7969	19.1925	52.1175	25.0665	149.345	21.6362	18.7205	97.3154	15.4315	19.1541	24.8953	7.15802	33.8414	47.227	16.0489	61.9911	47.3308	38.3758	28.0772	31.1779	27.5812	7.80761	70.3035	19.1943	8.31421	29.0274	21.0529	43.5356	164.43	22.582	23.248	11.5111	10.0232	8.40404	36.4097	48.6902	11.0706	8.27964	39.0165	98.1896	138.688	21.2949
APOA5	32.2752	60.2975	177.383	45.8314	40.2118	71.7864	41.3183	117.214	107.251	45.7562	168.571	108.964	159.341	60.4939	63.0426	112.077	162.242	200.194	129.005	163.481	74.8181	217.765	103.734	92.2752	115.791	58.131	71.6803	77.3119	59.3457	101.129	112.43	98.6504	96.4227	14.2467	27.245	94.9357	42.65	92.5475	15.1625	111.113	45.5359	27.5852	99.0629	189.666	35.3945	50.1319	43.9511	96.7635	57.8181
APOB	35.9448	106.414	137.047	61.7287	59.7448	47.5905	24.5993	40.0461	91.4718	87.5585	88.6855	17.5549	94.8793	53.9663	83.9694	19.9407	102.93	99.894	28.4699	116.05	11.0411	46.5372	141.665	16.5791	11.8413	90.7366	13.8427	71.6568	99.1628	47.3727	13.2366	32.9727	60.5103	93.6295	4.46793	14.3834	24.7857	82.7757	49.9846	97.8546	51.7692	91.5349	35.1761	18.2594	48.8811	70.8742	50.1757	64.327	21.8583
APOBEC1	134.044	159.174	70.8641	104.747	134.076	126.426	131.225	99.0145	130.3	156.48	166.393	176.167	202.628	186.596	209.041	298.462	167.054	238.58	108.495	131.365	156.717	174.124	103.453	132.196	130.934	66.739	157.006	168.091	117.115	94.1259	83.5011	109.772	105.081	179.276	119.46	94.0671	110.544	172.316	118.789	118.419	87.5369	202.357	67.3104	126.959	141.595	168.682	107.513	153.565	140.403
APOBEC2	104.135	80.1253	76.7013	105.163	125.558	125.189	115.487	176.512	144.266	161.373	153.272	124.738	177.209	113.421	185.966	101.658	200.839	167.453	154.663	156.282	109.871	125.803	140.714	117.106	148.112	106.972	144.644	172.554	98.058	136.798	149.703	103.128	104.064	139.165	130.977	94.5147	199.784	211.205	177.262	87.4594	84.9064	192.164	137.229	183.266	232.681	132.147	119.845	268.146	54.4432
APOBEC3A /// APOBEC3A_B	2987.25	3232.83	1216.24	3006.49	1201.17	2747.95	1673.22	4327.83	3188.24	9014.73	5660.52	108.679	1551.79	2797.64	5844.86	1580.61	3216.72	4864.29	4361.1	2019.01	6101.54	11857	7341.39	11592.9	4182.4	5873.77	3007.75	9977.15	5583.4	4265.87	211.689	12320.3	3955.59	13137	7160.89	4813.71	11072.8	7459.7	4824.61	7099.89	10468.8	3915.5	3125.38	3407.22	6742.21	2757.93	2316.38	2805.29	2589.31
APOBEC3B	141.82	134.634	579.868	160.901	493.967	361.358	260.163	154.28	231.126	144.661	159.179	1559.61	658.071	1607.31	394.066	810.927	130.716	135.543	145.219	239.73	153.065	279.988	176.664	362.143	156.93	476.49	1347.56	2647.43	189.03	139.436	4367.86	268.982	87.2652	193.328	87.0291	2657.55	442.482	713.776	129.049	887.347	1612.68	338.323	1143.32	627.701	842.483	891.278	1946.05	300.622	183.047
APOBEC3C	2072.46	2320.54	2043.55	1730.67	1620.7	1437.22	1616.07	2004.32	1710.72	1437.28	2032.17	2186.46	2251.75	1861.83	1786.68	1868.12	1733.66	1552.65	1859.32	2056.76	1701.79	1448.92	1197.14	1132.65	1640.14	1468.96	1545.96	2198.03	1641.77	988.837	1458.15	2225.04	968.197	2049.5	1379.78	1534.53	1203.95	1564.45	1344.91	1396.74	1946.09	1125.59	1247.8	1601.13	2018.04	1349.04	1856.36	1569.23	1098.95
APOBEC3D	206.861	231.387	172.182	170.89	211.756	171.022	185.957	237.561	241.646	226.228	244.274	173.295	277.892	306.833	331.262	257.942	239.731	188.83	248.077	255.805	235.918	227.481	228.232	235.068	165.768	220.843	197.723	159.833	100.126	173.198	203.248	287.568	214.926	191.151	237.938	206.588	213.288	132.123	291.081	259.167	244.564	198.666	238.799	368.944	246.789	259.687	146.341	326.871	323.745
APOBEC3F	84.995	216.123	121.973	199.434	120.617	105.953	117.033	180.004	133.842	276.497	153.109	178.461	192.491	57.1705	168.46	192.144	83.3291	55.3348	210.573	74.7323	188.011	113.384	175.033	148.757	146.371	182.087	171.532	190.897	86.446	143.231	48.3578	129.821	117.119	188.789	102.302	150.186	73.7349	230.275	194.503	159.16	128.717	162.852	39.0681	181.18	188.231	209.369	27.7939	148.75	224.087
APOBEC3G	3395.35	5446.12	3458.15	3627.34	3451.54	3265.7	3090.42	3790.67	3371.97	3481.25	5203.75	5812.71	3623.2	5370.66	4509.8	4247	2948.44	2194.03	3587.02	5895.49	3381.08	3397.69	3340.25	3200.69	3549.47	2197.29	2685.67	7239.79	3969.28	2547.54	3096.9	5439.19	2989.99	5975.91	3952.81	5638.07	3275.1	3651.79	3806.93	6395.58	7611.93	2987.18	3770.76	5149.87	4542.01	4403.15	8467.38	6156.8	4235.29
APOBEC4	88.9657	118.145	143.393	214.432	132.132	112.139	122.357	129.972	191.124	168.052	156.832	184.058	178.302	226.48	204.247	237.132	212.715	252.126	235.092	176.93	185.166	132.71	138.408	122.37	136.135	152.755	131.156	174.527	137.277	140.464	144.091	150.322	156.581	151.414	144.562	130.279	148.938	237.996	115.735	201.105	86.3992	164.518	130.722	110.085	113.868	134.443	129.497	150.616	190.1
APOBR	787.78	777.62	738.161	844.355	920.796	1089.77	591.303	1295.92	951.367	1075.38	1222.72	701.141	745.759	794.321	633.455	983.661	615.173	536.417	907.664	850.34	1100.34	1852.25	1170.23	1287.04	1143.56	1000.88	712.83	847.542	929.964	1125.26	1011.49	1480.11	1297.79	1550.38	1168.48	1549.69	1167.38	1041.03	1031.77	583.448	897.656	875.453	1714.12	595.848	873.869	1101.6	1766.5	1508.91	591.182
APOC1	165.777	200.795	105.849	13.811	55.0884	199.495	180.104	84.1461	76.4032	191.408	69.8817	229.149	218.011	249.19	444.487	339.044	424.35	523.616	324.287	254.934	155.899	217.666	37.1297	166.944	138.383	89.6987	398.969	141.043	90.1157	126.657	86.7125	10.8895	44.32	211.935	15.0347	338.136	114.481	20.4778	224.539	227.188	111.919	224.205	237.053	244.953	237.573	323.026	245.944	66.6586	290.435
APOC2	106.705	243.811	208.922	163.537	173.062	204.916	127.175	167.889	111.161	237.525	200.672	124.876	223.143	149.758	32.1729	182.007	227.172	226.015	266.943	260.324	166.218	187.144	147.644	144.436	118.758	161.042	186.612	141.75	132.85	214.223	177.346	109.193	132.24	180.881	186.861	148.853	201.227	401.057	194.54	156.551	226.168	112.079	202.662	280.313	212.773	104.218	228.451	204.134	200.629
APOC3	73.2736	23.9051	25.5443	20.5415	18.9789	24.572	17.103	25.7551	18.1388	25.4492	16.2339	33.618	89.6431	51.7608	29.8002	51.9597	25.4669	29.9067	28.9258	30.8192	36.6835	23.5112	20.767	27.7299	22.3505	18.5197	29.2982	34.5841	26.0898	25.1349	17.0892	16.7013	26.1269	19.1703	16.9855	17.1517	15.5846	19.366	22.279	27.955	21.8329	38.974	34.4177	30.8235	23.1241	25.5682	16.9255	20.8488	21.6073
APOD	142.397	167.737	206.475	170.501	170.774	149.257	144.19	140.013	135.45	154.307	155.091	155.065	23.838	43.4614	127.78	135.861	286.962	192.45	76.5319	120.06	194.894	184.927	96.4555	179.718	137.946	238.528	115.487	255.754	159.31	155.279	140.224	133.831	199.602	190.178	151.525	148.203	129.451	267.524	285.773	143.851	148.84	37.1431	145.576	108.186	118.729	133.934	154.142	96.3769	146.035
APOE	210.449	218.589	175.33	298.133	223.383	256.704	225.519	268.827	179.782	170.214	235.077	344.826	254.831	266.361	205.322	238.348	310.035	193.706	185.585	327.762	233.521	162.313	249.574	247.374	140.486	146.093	260.938	309.452	216.942	268.445	143.892	206.188	473.014	188.249	407.965	384.565	336.348	251.362	408.766	137.183	339.714	471.364	380.266	423.5	155.788	178.736	476.899	720.069	468.086
APOF	14.0522	14.9832	10.9745	21.5096	4.4624	36.0585	2.99094	24.2602	43.3608	4.8235	2.27067	6.35461	6.97927	26.8352	9.61123	7.90473	22.059	17.7426	42.6852	9.03467	24.041	21.3639	1.44309	5.28396	24.7188	24.0449	4.82241	9.85273	5.34123	16.5361	4.2937	33.5642	14.3713	1.98738	54.3568	14.7498	6.36398	70.1225	25.9191	20.2124	50.3029	2.69302	41.1423	34.727	6.0092	3.02454	5.37026	38.7658	52.1183
APOH	29.0032	80.8494	66.1127	152.155	121.741	114.856	103.68	86.8436	59.3677	158.102	124.09	87.8684	130.97	123.978	91.3416	140.895	123.785	116.18	42.8685	82.4575	60.0124	164.62	54.6421	86.2436	84.7684	121.949	149.783	143.888	114.388	101.299	111.362	91.6901	31.4052	88.7064	25.7456	48.6859	69.0098	143.374	113.778	17.0564	67.7483	19.0703	60.9545	87.7422	101.365	11.2306	68.2294	51.8484	12.7866
APOL1	292.479	256.246	267.929	256.424	282.869	238.467	264.075	279.665	152.563	293.483	281.154	222.796	160.272	284.812	273.61	218.533	278.591	302.972	353.871	314.026	254.663	565.507	262.981	219.561	277.287	162.048	207.014	531.343	313.892	247.892	343.933	387.328	181.515	380.458	384.782	421.152	371.677	371.12	406.342	611.083	343.328	158.651	168.953	480.65	454.626	228.256	378.668	203.671	412.846
APOL2	658.829	626.65	427.09	398.811	435.804	499.213	304.879	545.909	378.332	486.006	371.965	688.201	488.088	569.555	781.324	619.835	459.368	522.492	496.783	369.769	543.081	715.234	426.282	448.367	373.461	346.824	585.414	546.57	537.492	115.539	422.08	712.078	575.839	817.783	411.188	572.611	389.146	309.189	570.158	807.488	746.384	476.878	582.2	825.95	521.35	736.406	631.899	435.386	679.394
APOL3	1540.87	1199.52	1253.11	1236.24	1574.03	1717.77	1777.11	1434.34	2401.34	1936.25	1789.5	2339.36	2653.53	1441.17	2533.33	1584.53	1403.2	1832.97	1984.52	1405.19	1723.01	1008.28	1021.46	1425.46	1499.24	1180.12	1701.78	1432.52	2152.78	1261.99	2391.62	2048.37	888.737	1826.52	969.344	1312.76	1487.92	1432.48	1225.39	1588.08	1161.8	879.938	1165.9	1241.12	1510.99	1093.76	883.119	785.464	1680.44
APOL4	93.8584	114.949	85.3118	27.7154	33.6992	86.5244	63.34	127.111	83.101	158.727	97.7778	131.895	142.478	142.345	192.888	82.5959	12.5185	149.378	77.1071	105.113	33.1628	74.0875	72.3262	89.7156	78.4892	112.62	61.2944	198.348	23.1863	24.3305	125.828	135.612	89.8818	7.37318	25.6841	192.423	65.3344	138.605	84.1024	129.082	30.9258	102.84	49.3634	39.3423	122.948	77.3706	113.174	109.179	80.0576
APOL5	18.5693	16.6944	17.7252	10.5906	7.72769	9.79226	16.1661	15.1216	19.7001	16.4954	15.7624	20.5049	21.9565	18.9513	25.4981	11.8485	20.0422	22.7791	21.1687	24.422	18.6514	16.4088	12.7534	18.4795	10.6091	17.918	13.5988	17.8586	16.5743	19.6777	19.7796	19.7984	16.3829	18.615	20.8283	13.7146	23.6387	20.2591	20.736	15.5466	15.7501	15.6954	31.2788	14.6066	21.3358	21.8847	24.7065	15.5122	16.4256
APOL6	1320.99	1220.17	1220.9	1351.25	1640.45	1092.64	1436.31	1258.46	1286.07	1404.34	1711.51	1947.57	1789.96	2363.29	2049.18	1916.77	1568.27	1394.76	1949.99	1940.97	1365.48	1632.05	1050.29	1208.32	1029.26	681.955	1446.41	1446.24	1485.85	1094.37	1234.18	1934.71	695.799	1685.64	1580.23	1693.52	1145.75	1219.15	1462.11	1637.78	1126.55	681.905	1138.32	1210.94	1325.01	1378.43	1038.93	1085.62	1799.59
APOLD1	106.822	43.3095	59.9193	58.8163	21.0519	61.285	10.0962	104.243	33.8305	24.1504	66.8217	52.6038	15.9679	146.224	42.4067	86.6759	18.3217	13.3902	40.9384	71.1893	36.5196	134.289	20.9609	47.2114	83.9874	6.50363	9.98416	73.9872	11.3271	24.0884	70.8416	9.291	37.6709	40.1424	23.4232	29.1915	8.67715	8.42287	113.332	85.2511	62.0982	8.63008	11.8824	40.3318	51.8566	77.3568	77.2518	96.7594	33.0039
APOLD1 /// DDX47	2832.72	2988.01	2794.22	2628.98	3048.43	2764.37	3158.35	2585.52	2563.31	2304.94	2510.81	3298.54	2500.41	2724	2530.84	2397.97	2652.99	2507.02	2449.86	2551.96	2278.88	2179.78	2076.6	2094.86	2614.74	2524.06	2574.22	3339.05	2999.03	2854.22	2723.25	2556.66	3708.65	3526.89	3847.02	3568.94	2423.34	2286.52	3643.1	4597.36	3712.11	2549.27	3177.83	4189.72	3651.39	3526.6	3224.68	3351.41	4909.97
APOM	380.874	363.297	367.976	323.701	363.348	373.435	406.514	313.571	427.527	357.545	414.698	492.244	409.665	296.881	398.908	385.732	391.725	467.242	473.071	305.729	367.567	364.647	540.058	371.829	423.447	474.452	397.031	388.273	434.643	439.539	380.509	499.947	439.27	385.688	308.622	297.309	296.067	513.039	379.378	497.462	520.863	511.212	406.903	423.719	464.634	449.356	485.81	459.539	423.489
APOO	518.17	563.642	393.181	398.98	503.508	391.452	465.193	338.655	423.922	356.703	448.743	633.754	486.841	436.439	432.831	365.775	414.555	410.233	331.095	496.935	433.144	329.924	289.647	332.248	433.062	412.688	407.953	549.259	454.593	337.587	279.563	391.074	645.709	553.062	417.794	547.622	478.393	357.704	484.33	708.125	767.753	521.901	484.953	886.368	660.649	446.815	455.698	640.446	681.114
APOOL	512.574	476.138	559.445	569.446	522.732	493.837	490.484	525.83	612.649	447.112	594.013	563.489	607.015	542.555	516.265	655.716	639.779	690.239	562.142	589.991	473.031	450.19	457.082	634.515	707.741	593.122	401.218	484.865	607.072	522.37	767.231	771.883	408.027	353.739	373.661	401.689	662.821	623.48	340.492	375.384	448.905	431.749	361.65	395.892	445.303	390.003	272.233	384.49	389.924
APOPT1	1126.58	923.441	977.338	940.034	860.411	768.316	900.156	961.307	884.524	1130.17	854.702	789.786	1589.33	1033.81	1744.59	1419.25	1454.34	1524.03	1342.81	1537.58	1238.38	1175.62	1236.68	969.532	1048.71	930.215	1362.01	433.838	669.915	581.76	659.624	472.154	892.062	1023.36	911.303	1038	500.767	569.197	1250.96	1456.65	1106.44	1440.2	1357.76	1094.85	1439.74	1000.93	1347.41	940.75	1244.69
APP	2365.87	3114.09	2619.9	2714.49	2123.3	3028.32	2253.9	2411.93	2185.58	3968.14	2517.86	3276.97	2663.86	2621.28	2081.9	1767.51	3433.24	3382.21	2523.65	1353.81	3278.38	1010.64	5214.66	3207.37	3000.55	2300.52	3550.76	1854.65	2885.42	3102.63	2954.04	1987.45	2223.35	2163.75	1478.81	2545.93	5403.68	4651.39	2035.87	1340.58	2795.76	5213.48	3037.75	2671.34	2205.1	3094.73	2055.64	2856.05	2190.57
APPBP2	759.895	550.178	732.908	884.287	886.275	724.737	791.015	688.417	733.927	569.885	730.627	800.022	872.635	617.083	944.319	836.236	773.476	642.509	794.49	903.513	670.866	652.748	710.393	603.411	762.686	719.281	680.805	726.277	946.04	763.85	779.565	611.546	526.105	401.761	617.451	633.761	599.089	467.927	559.816	380.746	362.385	422.785	639.272	457.393	416.55	498.871	431.538	449.77	620.763
APPL1	1660.83	1639.19	1671.68	1555.39	1760.74	1549.39	1719.82	1469.91	1718.56	1464.29	1161.3	2015.51	1473.54	1723.78	1350.92	1491	1548.74	1473.11	1221.77	1356.47	1339.71	926.048	1401.65	1316.77	1361.04	1288.03	1260.21	1423.96	1754.68	1239.92	1247.05	1310.25	1713.16	1193.29	1527.78	1640.58	1006.57	825.208	1424.06	1159.41	1358.5	1398.42	1319.45	1258.48	1285.79	1342.96	1080.4	1210.25	1756.85
APPL2	647.355	593.175	656.67	604.304	706.967	470.004	800.394	473.972	579.63	525.62	570.582	508.82	701.052	463.252	684.888	694.376	668.736	643.371	650.235	639.967	542.042	756.387	360.152	454.804	387.586	520.242	689.755	413.222	532.236	515.454	465.415	497.24	251.564	229.287	315.643	270.141	361.133	471.671	423.269	324.983	254.259	338.786	270.869	459.155	312.671	214.763	368.257	308.557	418.186
APRT	2969.8	3251.38	3552.78	3445.08	3694.16	3394.22	3568.48	2959.1	3084.97	2985.27	2471.47	3765.21	2550.68	3384.4	2728.43	2609.34	2630.34	2958.37	2697.82	3147.58	2641.88	2307.04	3021.79	2838.87	3497.81	2843.48	2690.2	3314.47	3565.01	4091.03	3525.43	3049.3	3272.69	3246.93	3443.51	3310.07	3023.02	2983.05	3255.35	3278.43	2703.96	3270.57	3465.4	3148.36	3744.28	3609.14	2721.54	3142.95	4469.59
APTR	272.88	191.576	252.842	207.91	219.768	247.001	239.08	214.884	367.18	183.444	287.294	190.927	248.675	346.396	238.135	205.668	286.251	262.561	201.589	247.783	304.445	352.085	234.434	229.824	317.158	259.93	242.23	275.346	253.697	249.74	216.366	285.62	212.195	124.052	294.341	201.322	200.418	217.843	249.386	209.099	188.83	239.317	126.916	259.656	181.181	115.057	248.644	161.724	215.286
APTX	690.444	705.863	541.774	616.672	663.7	548.124	675.687	568.715	519.693	565.267	542.088	628.319	631.647	612.918	629.992	612.946	593.378	488.6	563.592	596.618	569.827	506.443	527.562	610.768	726.801	506.676	462.428	613.408	643.737	578.298	690.068	495.786	586.855	568.688	612.74	745.97	505.773	333.797	608.096	598.73	739.298	635.023	612.898	656.244	683.396	472.445	668.217	660.389	694.776
AQP1	44.8791	136.69	62.7478	60.6929	37.5316	55.4719	57.6283	92.7782	89.7932	128.025	90.7929	109.405	139.218	99.074	82.7927	75.2268	109.52	55.8918	125.178	60.6564	93.2635	99.3342	148.653	90.8257	103.471	126.02	71.4998	45.236	54.555	35.068	88.6542	81.2034	66.2777	90.035	95.3523	45.8566	74.1422	120.343	84.4776	158.01	150.142	95.3223	97.8968	187.496	127.881	68.2922	118.919	133.516	140.135
AQP10	208.04	487.479	383.032	240.184	23.4301	299.744	554.36	270.783	247.769	1144	39.0299	113.506	95.0738	81.1043	98.559	123.507	361.967	28.5599	125.337	304.949	228.677	59.1166	1164.08	567.789	106.035	27.3249	21.6063	210.697	95.9896	47.3451	158.032	216.517	493.668	677.398	26.4516	456.733	732.975	449.385	212.969	25.6028	547.011	1268.22	322.049	661.862	163.226	261.458	606.769	302.277	126.889
AQP11	117.831	41.7128	108.347	29.5702	72.2183	23.5927	111.177	85.3998	16.2146	9.23053	83.8079	29.3104	76.9674	17.9343	16.4386	44.9911	26.9231	30.8561	22.4082	27.3633	23.4897	9.57809	11.9937	25.1807	11.8783	8.00842	17.909	15.2903	25.7106	65.9544	14.1499	21.8199	12.4622	6.38797	79.076	62.0588	23.767	22.8006	126.042	134.958	29.7415	8.75959	12.7165	78.0062	16.4391	22.4595	26.957	16.6818	30.9553
AQP2	277.607	344.469	292.894	385.823	332.34	362.953	366.207	375.209	417.207	464.958	321.292	305.162	274.038	474.521	506.61	365.726	380.597	570.81	382.659	317.85	429.668	510.146	472.832	288.186	393.153	422.765	235.108	474.236	406.724	474.533	440.261	378.723	317.5	233.612	207.884	326.653	213.297	455.191	437.172	297.065	251.681	332.496	395.107	316.355	237.647	331.621	317.719	400.439	316.711
AQP3	4314.35	3826.45	4336.72	4641.75	4874.78	5232.9	5288.8	3131.99	4118.94	2086.29	2535.54	3087.28	4449.19	2895.38	4202.64	3416.08	2999.29	4427.78	3533.45	4241.71	2896.58	4827.92	1083.26	2508.57	2758.48	4037.78	4044.14	8071.39	4530.79	4730.36	4416.59	1071.75	1983.4	2846.69	4509.68	3991.84	4953.39	4497.99	3336.32	6145.82	8553.23	1053.99	2144.11	6108.31	8900.73	1217.57	9170.05	2284.43	5808.9
AQP4	2.52605	49.7352	36.6655	17.1507	36.7117	23.2354	10.9042	25.9597	35.3961	21.3281	46.2878	37.4169	27.6155	3.45974	72.3945	65.7247	51.5733	4.92893	29.4814	70.0676	7.44943	29.9526	10.2727	13.9379	23.0233	8.81913	6.66981	44.3654	46.6064	21.5736	21.1568	35.8272	8.35083	4.9197	80.1624	32.4688	16.4611	35.157	38.4623	14.0348	5.3709	56.7408	48.9534	17.3169	26.2362	27.8708	23.5732	37.254	19.4786
AQP4-AS1	16.6961	49.1645	16.3885	28.2502	6.90129	22.1067	49.947	27.9574	80.5512	24.4552	33.8044	8.03445	60.2167	50.0568	33.1303	72.0554	68.3145	47.6091	51.7462	66.9529	49.8502	48.4174	43.1386	5.58893	17.9546	88.3087	76.4664	48.4509	20.7378	7.62204	48.9127	46.3548	36.7005	28.4423	40.3453	27.4472	19.3089	54.0906	35.2919	59.5492	8.88058	52.657	26.8499	79.5923	76.2352	50.6293	35.192	37.7848	7.75655
AQP5	39.3872	28.0458	25.69	19.9686	18.2808	42.0997	21.6176	23.1421	22.875	38.4025	9.55522	119.525	23.6817	97.474	21.2407	21.4968	26.6912	12.8442	43.3703	10.9208	29.0925	95.8736	50.217	29.6532	19.2006	15.8958	14.2952	35.2856	27.1233	14.2021	33.8157	28.8333	35.0064	34.0706	55.2197	24.4293	44.3711	130.949	67.6215	35.5389	32.806	51.1412	42.8012	54.4171	35.6661	76.7831	16.3087	74.711	15.4174
AQP6	99.009	30.0838	83.7326	100.562	71.3037	71.1893	49.6653	24.9036	47.6203	117.701	88.5394	75.2676	29.7401	62.4382	148.34	87.4444	141.976	56.2108	158.556	125.101	121.596	149.603	230.169	20.3173	95.1246	131.026	79.474	82.1239	35.284	30.6251	63.7171	31.2003	164.108	95.7077	135.603	149.175	31.5992	75.949	160.243	77.8393	163.637	135.85	151.684	128.489	23.9312	21.303	83.103	68.5841	155.472
AQP8	14.1325	97.7939	76.8211	24.262	107.064	65.855	101.062	3.72718	25.0742	41.287	41.6856	20.3921	105.242	38.918	21.2082	57.609	64.7842	23.657	25.775	82.9387	127.093	78.763	47.9204	18.3123	33.4764	177.158	83.3272	93.7167	32.482	29.7054	39.856	70.3162	22.5004	32.1758	58.4558	24.0363	11.5478	48.1725	98.6592	41.9878	19.7054	64.8078	16.8475	78.0954	119.883	97.5076	14.9191	22.7676	32.7365
AQP9	1932.09	1768.51	877.155	1429.94	995.532	2067.44	867.592	3245.58	1382.9	2373.67	2494.5	2298.65	937.35	1456.68	1344.77	1821.81	1580.55	1660.31	2492.5	1239.11	4897.25	14510.3	3961.93	5454.75	1240.09	5429.82	5331.8	5365.11	1913.16	4570.26	3532.36	9130.81	11112	5280.89	6612.49	4093.36	6334.56	7502.17	6326.69	2185.16	3033.59	2130.55	8064.51	3929.96	2192.79	3081.67	4261.37	6039.07	1303.18
AQPEP	4.85043	112.04	3.66849	43.354	34.3212	7.24211	11.3162	6.94573	8.67005	8.15929	7.67183	34.5882	6.49606	33.749	49.8836	9.7235	10.7206	10.1783	13.0879	8.37196	10.1869	6.32158	4.12918	45.297	9.54766	57.5963	8.92119	50.6737	9.1496	4.83856	4.2748	5.51052	9.92601	17.1294	4.31815	2.05959	8.13626	44.3547	6.42941	47.0432	17.3174	28.793	4.20195	9.89824	24.6184	9.38964	4.41767	5.50725	2.07228
AQR	1850.95	2205.95	1714.61	1964.94	1848.47	1893.28	2007.34	1738.67	2135.03	1921.75	1824.95	1764.65	1840.02	1749.69	1838.29	1912.81	2114.15	1803.78	1980.12	1807.67	1875.83	1367.37	1561.94	1744.92	1634.26	1584.61	1715.8	1442.88	1657.89	1760.66	1647.66	1645.83	2293.49	2040.62	1875.44	1748.94	1960.72	1541.92	1758.14	1652.07	1818.07	1655.98	1673.43	1801.97	1853.14	1953.1	2041.98	1778.66	1872.3
AR	163.576	186.765	199.482	191.605	122.894	160.713	178.391	183.736	192.053	187.793	91.5094	208.307	213.861	101.806	203.705	168.706	225.192	43.2307	175.619	236.186	153.506	181.486	176.903	99.9838	228.67	26.6915	28.0035	114.738	182.692	197.884	273.731	119.164	49.4645	117.167	75.9867	177.792	234.379	220.033	187.978	85.9305	130.527	26.0756	17.6595	26.487	187.131	117.368	23.9114	16.5874	163.272
ARAF	1328.98	1310.12	1078.57	1102.28	1560.61	1333.94	997.363	1445.45	1136.16	1538.64	1636.59	2139.59	1515.63	1607.09	1530.23	1212.66	1295.77	2099.95	1367.84	1256.43	1621.06	1189.23	1700.05	1591.96	1433.79	1721.59	1556.62	1635.46	1704.38	1680.83	1535.49	1911.37	1640.59	1825.42	1584.43	1426.97	1808.87	1611.53	1755.99	1726.18	1850.12	1431.91	1632.59	2224.73	2044.31	1585.97	1593.89	1886.25	2141.79
ARAP1	1912.24	1913.74	1695.32	1900.94	1721.86	1914.86	1499.4	2245.22	2002.57	2219.61	2433.64	1986.84	1680.84	2375.53	1963.17	1890.42	1949.45	1756.59	2255.03	1751.95	2574.18	2842.86	2847.48	2377.25	2418.35	2122.07	1970.36	1602.55	2022.41	1717.52	2002.65	2069.53	2527.24	2897.25	2144.81	2496.32	1424.9	1919.91	2984.01	2140.11	1971.7	2291.51	2540.96	1559.77	2136.9	3136.07	2675.21	1987.23	1701.11
ARAP2 /// LOC101928667	1916.63	2334.08	1673.95	1685.3	1942.89	1386.68	1860.84	2294.7	1794.31	1501.7	2059.47	2170.03	2335.99	2366.48	1931.3	2358.69	2508.3	1392.48	1982.27	2118.98	1998.83	1661.04	1219.44	1137.56	1379.58	1076.98	1476.68	1461.55	1689.73	1228.05	1886.03	1739.07	1333.17	1733.08	1619.48	1706.09	1478.88	1546.46	1713.4	1918.6	1489.1	1322.09	1311.82	1505.39	2316.17	1642.34	1478.61	1561	1568.77
ARAP3	780.981	486.821	429.766	416.27	560.384	508.632	308.968	952.931	451.006	673.348	718.568	609.575	486.253	606.47	472.551	477.119	651.174	503.106	871.993	493.036	1018.82	1338.44	726.276	930.646	733.06	619.281	798.12	344.829	621.263	968.78	821.511	961.965	937.464	823.453	869.06	612.552	876.862	782.146	903.075	503.558	569.211	788.919	934.092	344.388	500.212	898.779	947.827	757.635	548.733
ARC	12.8728	8.33115	8.02274	4.79729	10.1437	5.17443	11.69	6.34768	7.35552	14.9744	12.9682	9.66413	13.5081	7.28734	4.60039	12.9956	22.5956	7.92587	46.1227	12.7851	7.68509	15.5815	31.289	19.5484	4.34461	8.86055	13.092	19.4568	7.38323	7.09645	14.309	37.4203	45.1001	29.8939	20.009	16.0458	46.9593	18.6707	9.9244	9.32302	65.4727	9.60315	19.3194	14.6844	10.5141	114.431	10.9028	50.0449	16.6375
ARCN1	3278.75	3678.31	2372.88	2334.34	3387.29	3320.86	3163.45	2981.42	2867.04	2185.1	2964.09	3533.37	2574.25	2920.75	2544.99	2850.83	2745.41	2369.68	2804.08	2839.4	2822.47	2943.7	2089.94	2612.86	2927.16	2687.16	2386.64	3091.2	3052.38	3459.5	2591.46	2833.49	4254.59	4014.49	4790.06	4385.21	4161.23	2232.33	4283.81	4279.75	4886.66	3439.37	4533.45	5339.41	4914.77	4789.14	4874.58	4140.37	4463.81
AREG	9.96206	20.3516	27.9781	2.92963	11.9237	2.01767	4.65485	9.80698	42.7298	27.7531	33.7644	53.9349	21.1375	15.5946	32.3261	12.563	23.0271	123.034	29.6137	30.0302	53.963	15.7198	103.117	123.613	2.91676	36.6168	65.586	18.1744	50.224	9.15297	22.3873	50.1586	30.9985	13.0049	32.4246	9.80704	64.0481	125.914	10.8175	7.27815	12.7846	25.8342	69.574	36.1387	13.0264	1.78008	188.465	9.49602	21.0593
AREL1	1518.49	1278.57	1172.76	1517.52	1328.84	1172.52	1296.13	1305.91	1161.03	1168.58	1467.15	1312.43	1166.72	1423.45	1268.21	1576.89	1175.07	991.437	1469.41	1211.91	1361.87	1672.16	1500.84	1380.27	1280.5	1235.48	1193.28	1044.61	1272.72	1251.62	1265.37	1434.16	1078.05	960.819	1219.24	1263.58	1246.17	1038.36	1093.11	950.268	1070.3	1234.3	1223.55	1191.2	1107.83	1301.38	1236.78	1203.21	1048.46
ARF1	286.174	216.975	394.586	317.084	339.922	254.909	226.799	354.779	324.617	298.767	362.26	297.686	396.812	240.112	319.173	316.15	332.529	820.37	313.462	376.555	416.935	514.358	696.417	442.234	748.573	333.444	679.674	306.647	196.96	167.07	252.743	235.658	328.824	396.28	227.064	211.252	350.711	540.897	264.523	269.951	299.156	385.91	350.406	198.943	291.88	231.714	610.014	353.341	244.494
ARF3	3937.99	3588.7	2863.18	3032.74	2977.46	3415.84	2776.57	3499.56	3238.52	4452.73	3869.42	2894.86	3048.77	3378.63	3264.75	3108.69	3429.51	3231.24	4037.23	3600.22	4173.87	3263.03	4720.24	4356.91	4240.41	3127.17	4075.64	2749.33	3324.02	4299.29	3651.97	3492.47	5090.13	4141.07	3292.48	4088.37	3935.04	3356.89	3588.04	3097.31	3183.59	5100.37	4826.92	3855.94	3896.47	5489.18	3354.08	3946.02	2914.94
ARF4	5570.62	5839.66	5627.99	5863.91	5585.53	5955.12	5331.5	6228.75	5802.99	6685.61	6993.66	7227.6	6021.72	5786.68	6603.96	5725.52	5257.13	5440.37	5556.24	6486.39	6134.94	5620.66	7538.35	9289.46	8930.62	6521.22	6242	6729.55	6514.01	6957.97	6580.06	7029.27	7262.59	5924.42	5842.89	6533.62	9835.18	7079.77	5865.53	4768.96	6013.79	7520.14	7353.81	4854.4	5927.83	8078.91	5178.08	6123.01	4681.25
ARF5	2253.34	2216.42	1880.62	1849.61	2069.08	1899.51	1734.87	2209.86	1926.95	2113.36	1997.59	2493.88	1482.59	1604.31	1596.8	1704.34	1992.36	1712.82	2042.37	1827.14	2209.19	2027.92	2875.53	2480.33	2299.45	2160.93	2234.34	1895.39	1735.24	2446.12	2013.38	2430.79	2206.07	2722.6	2534.55	2403.37	2004.8	1735.42	2579.21	1541	2202.6	3511.92	2413.17	2189.28	2033.7	2917.36	2554.59	2164.13	2476.19
ARF6	4363.85	5392.71	4478.55	4101.89	4709.29	4580.6	4017.71	5428.02	5048.28	6006.25	4900.28	7187.19	4908.23	6232.18	5129.57	4444.02	4902.45	6445.67	5173.72	5309.78	4279.46	4451.78	5553.72	5467.92	4982.23	4182.04	6643.83	6710.33	6096.59	6075.14	5728.84	6674.19	5831.32	6883.94	5740.82	5535.41	5684.79	5237.64	6333.1	7246.88	7313.16	6451.76	7641.5	6022.58	5693.57	5954.64	4769.39	5536.67	5819.19
ARFGAP1	553.987	623.58	417.476	691.443	622.505	504.845	436.406	263.118	443.764	443.216	556.566	240.83	459.783	395.736	374.603	568.109	364.666	318.549	461.254	397.166	441.422	296.688	337.938	417.543	496.803	345.819	357.743	270.234	251.396	351.061	507.427	295.805	504.022	493.424	510.041	419.91	243.118	294.088	422.232	421.155	433.464	415.873	306.117	303.728	497.98	406.686	525.39	346.795	437.166
ARFGAP2	1985.93	1838.88	2162.31	1963.72	2543.24	2096.23	1671.63	1746.12	2057.85	1962.74	2213.03	2386.02	1870.71	1906.16	2350.55	1977.26	1853.69	2157.36	2624.05	2019.47	1902.53	1545.47	2269.55	2049.16	1999.02	1915.57	2252.83	1831.07	2358.39	1995.6	2202.38	1917.74	2468.16	2794	2223.47	2209.29	1853.01	1884.18	2255.22	2420.81	2371.69	2151.81	2409.59	2330.96	2310.45	2597.52	2695.73	2347.4	2577.27
ARFGAP3	2205.47	2098.88	1840.21	2307.78	1915.27	2098.45	1627.85	2092.8	2180.55	1832.87	1961.97	2489.82	2133.36	2105.04	1898.18	2072.24	2101.28	1566.73	2530.38	2160.32	1854.39	1979.4	1643.07	2125.59	1763.3	1997.6	2242.06	2863.62	2190.39	2285.73	2358.1	2814.09	1541.87	1193.92	1308.86	1417.27	1948.71	1802.86	1297.04	1205.43	2278.06	1347.46	1099.9	1508.63	1200.76	1901.83	1549.11	1297.34	1413.34
ARFGEF1	2024.97	2006.05	1669.29	1900.68	2160.26	1779.88	2209.39	1955.03	2069.18	1648.6	2045.92	1837.07	1902.53	1713.86	1596.84	1899.28	1859.54	1291.41	1939.25	1646.57	1701.64	1623.77	1694.82	1860.55	2102.6	1661.93	1834.32	1760.54	1989.69	2010.43	2015.8	1635.29	2132.51	1819.35	2145.86	1727.66	1962.21	1509.49	2381.02	2394.66	2091.41	2858.36	2391.99	2284.79	1712.55	2191.92	2389.54	2679.04	2880.35
ARFGEF2	2265.23	1945.35	2356.89	2101.66	2298.2	2049.98	2394.68	2011.54	2270.52	1984.79	2181.53	2090.27	2336.22	1821.9	2139.91	2287.48	2233.35	2152.21	2201.11	2190.27	2076.19	1740.98	1879.25	2203.18	2459.36	2237.89	2009.25	2111	2236.06	1948.66	2119.72	1871.09	1598.37	1643.23	2232.95	1777.96	1840.57	1526.19	1602.28	1995.35	2015.47	1277.9	1498.41	2230.48	1898.72	2013.17	1842.25	1408.62	2038.75
ARFIP1	994.066	1027.57	1040.1	962.582	934.457	1004.76	715.147	1069.19	986.456	900.105	1008.75	1805.26	1157.21	1012.98	1189.39	1040.84	1217.65	735.75	931.621	1057.19	1088.61	1736.02	1037.68	1293.95	1148.58	1159.58	832.71	1183.12	1379.54	1504.68	1612.49	2133.78	1441.88	1206.19	1351.77	966.562	1558.91	704.598	1464.64	826.69	937.524	1217.74	1284.85	758.491	688.28	1398.6	883.39	1137.01	791.455
ARFIP2	954.286	837.146	927.573	1056.91	1096.69	804.313	1067.28	841.164	1074.21	998.062	932.063	1014.76	1063.58	940.18	1010.03	852.57	919.962	796.243	958.803	885.388	800.858	868.454	917.476	954.124	989.766	1001.38	1012.25	1016.54	1052.74	1008.63	875.212	856.88	1369.11	1106.51	909.008	936.973	805.454	1103.89	1036.28	1102.47	1259.08	925.587	1191.35	1153.47	1273.74	1122.89	1338.95	1177.69	1276.56
ARFRP1	425.42	688.733	695.247	656.2	652.937	655.808	748.882	507.633	575.056	452.375	464.594	656.074	531.055	403.574	573.409	438.217	503.596	499.162	534.461	605.747	382.591	340.709	252.966	372.912	269.181	418.603	479.59	541.153	707.169	631.528	550.282	497.968	694.657	514.015	547.285	602.95	476.183	510.224	514.909	657.845	529.287	371.115	625.939	858.62	417.913	522.102	669.992	744.888	897.583
ARG1	172.962	50.3724	130.716	106.137	101.251	80.505	198.629	76.5376	96.4932	184.923	69.4897	313.447	114.765	125.195	161.705	216.674	209.038	80.1529	450.441	186.681	299.803	382.661	1520.2	3756.7	1609.46	1678.76	117.392	507.35	96.7208	379.734	168.02	2667.65	1824.54	271.632	2207.08	557.55	829.576	3119.34	252.496	140.506	533.907	20373.8	855.067	3794.27	433.198	1048.97	1763.64	2665.16	470.074
ARG2	140.355	299.281	323.431	137.815	183.15	187.064	202.201	337.516	222.531	205.671	260.223	308.396	161.55	296.642	302.544	194.863	337.317	245.255	181.706	187.804	280.773	197.516	168.49	349.8	166.223	190.267	249.449	344.702	223.051	246.78	245.204	248.909	338.364	294.561	232.655	287.372	352.911	182.55	273.267	304.313	432.258	439.867	267.651	410.392	236.885	420.324	235.954	343.222	382.355
ARGLU1	7468.54	7963.22	8161.17	8871.31	8001.92	7311.13	8903.99	7509.77	7225.86	5901.66	7086.36	7222.64	10113.8	8440.48	7661.05	8131.03	6506.25	8345.72	7441.46	9089.48	6046.06	6706.6	6536.89	4971.15	7902.96	6993.21	8383.62	6422.53	7030.13	8052.25	7308.16	5596.36	5526.41	5337.02	6120.68	5252.96	6131.18	6955.88	5734.05	6732.81	4787.52	5881.53	5969.77	5476.6	6612.11	5620.61	5795.48	4501.73	5463.27
ARHGAP1	4496.11	5026.01	4388.71	4254.61	4562.69	4818.83	4467.31	5130.81	4540.88	4897.12	6012.08	4748.33	4492.31	4687.99	5186.25	4759.76	4613.17	4497.45	5682.01	4465.2	5191.14	4353.4	5952.42	5075.05	5880.62	4609.62	4776.22	3833.46	4625.27	4840.35	4688.67	5467.73	5222.15	5074.69	4760.93	5324.26	5386.51	4542.34	4600.34	4201.1	4394.75	5651.64	5662.72	4285.83	5039.2	6066.65	4385.34	5098.78	5155.5
ARHGAP10	303.413	201.403	259.216	301.126	187.568	291.543	339.342	228.607	297.071	260.881	275.877	322.392	238.898	421.601	195.363	320.511	234.508	300.876	341.225	414.928	349.407	312.836	234.133	367.402	336.052	301.647	230.944	406.546	265.213	422.175	362.467	322.107	369.976	220.134	266.361	426.643	273.189	478.091	319.001	316.244	334.599	445.586	289.998	489.963	388.487	557.326	323.877	285.945	429.536
ARHGAP11A	7.76728	42.1615	29.4917	33.517	14.7792	49.8816	28.2021	8.95013	43.7875	54.3185	38.5364	11.853	18.8941	37.431	40.585	96.9897	10.3944	17.9179	77.8745	69.8129	76.803	17.0148	2.18722	53.1389	34.2221	51.2291	9.95278	81.5722	29.2254	44.2864	60.9244	43.977	19.3021	47.5537	38.6954	22.7624	46.4127	44.2587	53.6164	45.0403	38.3265	36.2756	19.3798	25.3556	40.1412	22.282	50.8079	43.263	13.272
ARHGAP11B /// LOC100288637	105.087	132.304	65.903	87.6522	73.408	92.0661	55.5671	115.07	112.355	107.616	108.551	43.1348	113.779	125.296	91.7285	116.138	106.258	124.527	65.1363	106.358	107.854	92.0811	134.442	108.681	142.985	115.454	42.9994	101.804	78.059	65.3016	108.066	104.874	41.7016	91.9997	99.4523	128.852	161.222	122.09	85.5557	69.4596	107.588	125.62	78.8436	100.238	72.8887	47.8429	78.0178	120.042	131.26
ARHGAP12	566.571	551.574	759.846	631.689	686.671	604.85	780.636	516.556	717.755	399.35	473.885	721.943	868.346	562.271	803.168	808.78	604.864	713.506	738.307	976.916	541.353	697.658	351.471	519.993	495.333	731.239	814.947	505.961	622.749	485.591	477.352	521.773	247.414	208.247	263.138	233.631	297.186	357.544	287.613	307.298	205.389	338.254	255.537	269.588	387.16	354.784	404.408	313.702	430.148
ARHGAP15 /// LOC101928361	4181.1	5294.93	5311	5289.64	5207.99	4625.87	5410.77	4266.1	3949.67	3507.95	3816.44	4851.65	4773.26	3756.66	4077.62	4032.02	4092.68	5599.41	4336.64	4404.85	3616.02	5962.22	2321.54	2878.44	3647.12	3905.58	5155.34	4363.16	4406.86	4725.96	4737.48	3573.85	5746.17	6826.58	5699.75	5176.83	5062.07	4772.63	5966.73	5832.56	5345.42	3182.52	4772.46	7135.4	5857.09	4263.33	3937.5	4303.15	7969.91
ARHGAP17	2100.51	1748.39	2076.62	1449.84	1895.53	2012.66	2266.36	1962.95	2316.19	1827.65	1429.01	1380.14	1547.43	1858.34	1617.46	1521.94	1618.42	1679.23	1369.55	1476.57	1504.27	1922.13	2268.57	2035.98	3235.13	1974.21	1244.8	1609.23	2151.96	1933.37	2023.91	2064.92	2210.3	2609.98	2382.56	2574.11	2128.82	1232.47	2923.62	2509.72	1798.7	1303.7	2232.58	2680.55	2015.11	2041.13	1478.08	2252.06	1623.12
ARHGAP18	713.781	1110.52	936.106	691.391	563.474	771.246	660.708	809.439	872.646	1262.67	704.492	814.225	507.53	770.648	587.751	791.427	760.021	475.372	738.832	863.706	781.497	699.215	1438.31	1700.74	649.854	774.496	600.351	950.215	569.158	631.012	889.066	964.41	1024.36	797.603	644.364	981.038	1338.79	1039.75	768.515	507.433	769.58	1195.41	1090.45	814.19	720.501	1123.59	838.521	956.638	600.074
ARHGAP19	645.037	659.293	587.412	673.623	668.625	585.451	727.057	692.58	749.026	751.321	652.629	611.492	589.133	609.622	754.118	678.589	639.972	460.648	712.904	562.761	611.848	788.078	866.87	830.555	980.21	735.265	650.066	688.559	719.089	735.52	759.269	749.333	855.538	594.359	719.365	786.12	520.339	795.93	902.659	796.007	588.958	1034.66	853.965	754.675	620.247	712.891	787.228	990.893	651.238
ARHGAP20	47.249	38.7407	96.5492	30.7383	22.7365	58.3463	60.2427	70.8073	73.9491	86.5843	127.674	16.5984	150.82	149.139	178.642	101.137	151.588	132.345	123.306	86.0473	121.451	32.8652	142.402	24.832	79.2157	135.019	125.346	97.326	59.8919	39.6854	88.5381	99.0965	62.6616	18.4755	88.0793	34.2694	160.133	35.2013	24.5452	87.7159	41.8075	60.9208	149.869	67.3784	116.403	92.5988	64.1535	156.64	125.902
ARHGAP21	1098.44	1039.22	1162.01	926.811	778.01	880.073	889.149	1030.01	1232.88	1603.21	939.434	1217.34	889.276	1118.54	1058.41	1120.64	1247.03	926.935	1350.54	1192.54	1061.77	714.724	1251.57	1372.84	574.076	828.159	1055.14	639.408	785.129	761.986	1024.75	1016.76	574.634	904.779	523.68	743.56	1098.89	876.169	593.471	571.69	635.646	927.073	569.809	548.883	528.368	784.845	833.879	705.124	497.767
ARHGAP22	50.2351	94.5469	102.422	79.6918	85.6427	63.0711	37.9229	105.603	66.1103	85.3651	112.505	91.9971	106.51	79.1387	132.339	113.77	72.7443	78.7521	132.855	107.822	76.1609	54.3222	38.1021	107.45	96.02	78.0803	125.084	69.5925	66.3878	93.0138	124.69	59.6695	88.9879	19.4102	93.6663	5.83569	111.5	105.408	24.6059	95.7902	119.219	104.266	17.7214	126.444	88.096	116.431	64.0891	91.4394	61.7942
ARHGAP22-IT1	66.5719	118.141	62.4806	147.423	97.5502	34.7931	28.6162	24.9268	133.283	111.296	124.16	25.0996	93.8812	68.9439	156.587	70.5982	152.869	154.912	71.7942	38.0551	268.275	72.854	139.515	129.846	18.0098	35.911	96.1842	92.302	87.6382	54.5227	102.556	75.5634	83.6479	150.618	124.484	73.3711	114.173	114.08	122.854	142.102	29.522	113.138	120.888	105.265	95.7652	90.3589	20.9983	26.4307	120.283
ARHGAP23	221.806	290.727	197.664	174.963	122.971	171.913	142.761	167.583	188.88	187.984	136.643	300.062	129.362	163.906	201.203	240.458	255.624	269.978	212.428	208.35	155.573	170.488	157.469	165.691	141.628	142.598	199.783	258.639	186.369	136.347	180.815	199.935	219.683	233.795	313.631	247.256	201.772	158.07	288.224	217.891	248.698	242.096	178.643	238.727	374.561	251.856	151.183	212.581	331.569
ARHGAP24	121.172	157.424	136.426	245.751	118.001	153.457	107.948	133.353	153.409	112.54	157.998	192.928	135.575	65.5776	129.468	76.5462	143.282	186.558	142	114.225	126.126	70.1424	471.022	130.888	275.087	191.388	239.792	132.902	129.216	181.4	133.798	223.17	239.226	61.3633	222.787	112.926	112.787	258.898	234.974	83.4182	88.2416	286.054	178.888	129.154	13.6939	214.019	165.964	158.461	83.2929
ARHGAP25	4778.06	3736.82	3839.5	3665.2	4615.79	3844.67	4743.54	5393.01	2978.47	2928.66	3737.67	4014.15	4414.32	4978.58	3386.76	3800.27	3310.8	2238.02	3631.98	3613.21	4310.75	9460.2	3333.67	3612.68	3165.59	3865.84	3288.54	4482.61	2854.6	3528.2	3084.02	4848.7	5818.47	5037.24	7322.96	5434.71	4317.03	4721.89	6569.89	6204.71	3890.09	3815.99	5998.69	6728.09	5081.32	4310.13	5277.31	5861.52	4219.64
ARHGAP26	667.723	699.321	626.087	758.76	433.248	661.902	501.857	1027.52	689.305	980.581	896.352	748.947	600.781	935.474	872.836	798.795	698.146	649.465	1089.64	480.398	1324.92	2108.67	1140.54	1091.13	871.144	900.929	1133.93	838.317	569.771	910.301	798.257	1541.84	1543.09	1110.94	1146.39	1057.95	1015.01	1363.25	1391.54	510.076	600.505	896.803	1398.65	564.348	634.853	831.128	1252.68	1123.2	608.97
ARHGAP26-AS1	12.6164	17.5704	7.31798	9.07065	11.4746	13.1882	5.38964	13.493	5.4472	49.793	12.3654	12.7197	8.35992	12.1526	18.0477	14.0112	13.1372	10.2355	10.6758	13.6708	13.0833	5.73744	12.1844	13.6628	17.1473	15.28	24.7276	28.9829	6.7784	8.77571	13.2138	12.6752	53.2625	101.95	39.0055	17.8154	18.1698	17.8028	78.855	12.1126	6.65167	47.7511	6.14315	15.5264	8.61687	22.2858	20.7734	18.748	13.9243
ARHGAP27	1766.61	1504.73	1501.23	1628.03	1650.06	1708.82	1336.89	1815.84	1613.17	2040.29	2122.87	1549.35	2029.78	1755.53	1667.26	1830.24	1894.53	1727.82	1708.35	1773.36	2007.16	2759.09	2334.78	2115.15	1897.87	1765.97	1668.89	1499.98	1791.58	1568.4	2226.62	2043.67	1762.69	1986.83	1103.67	1762.48	1189.91	1256.35	1922.45	1491.66	1575.45	1728.23	2298.28	1197.29	1846.57	2207.04	1414.57	1412.65	1272.84
ARHGAP28	37.8958	16.3231	17.9843	15.4682	75.3847	11.7304	62.9406	49.6666	64.9368	13.917	13.6315	41.1519	19.55	8.24396	13.7016	19.375	18.6603	18.562	13.3837	20.0533	49.6451	39.5725	11.219	34.5348	11.9783	65.1909	15.7036	60.1107	12.8675	33.4998	37.6234	24.2821	66.9044	49.9058	38.1276	52.807	72.6903	34.3624	71.0983	23.5855	96.9964	12.6167	11.7657	86.4867	5.57249	19.6448	109.885	13.663	110.057
ARHGAP29	132.613	177.54	74.9306	90.5783	92.3831	142.266	41.9535	87.4107	157.189	177.624	234.964	176.486	127.223	133.404	169.899	112.06	238.92	99.7678	139.528	158.114	179.993	128.432	526.121	369.89	101.442	282.376	65.2368	178.262	97.5355	106.656	174.743	299.793	123.475	102.583	68.9336	95.074	357.732	259.679	48.3213	57.3968	253.871	414.4	282.841	66.9394	59.6032	385.321	151.329	406.14	51.9602
ARHGAP30	6938.62	6913.78	6391.68	6068.36	6848.35	6777.88	6980.27	6333.32	6263.22	6534.57	7598.23	6581.87	6764.41	6293.99	6376.12	6553.91	6137.78	6056.02	8160.71	6647.03	6175.15	7060.69	6767.43	6240.99	7565.47	6601.68	6977.55	6408.02	6794.68	6527.19	6534.22	7006.58	8860.1	11107.5	8466.71	11906.6	6432.67	6029.17	8918.82	10159	7620.43	7531.04	10330.7	6342.82	10643.7	10413.7	13466.7	6985.93	7284.76
ARHGAP31	373.261	430.584	299.699	355.804	305.17	396.404	236.51	380.814	373.421	526.061	397.252	418.011	332.211	361.11	381.697	315.179	340.185	502.41	459.548	320.55	459.132	164.574	688.115	602.664	709.417	538.854	300.205	295.282	411.893	394.209	432.991	429.217	645.143	500.049	459.347	546.985	511.227	283.766	394.353	490.259	433.337	674.542	844.603	410.436	541.376	748.938	499.97	576.884	389.252
ARHGAP32	102.438	150.687	150.323	145.056	160.54	132.029	111.681	87.0274	170.658	133.907	140.083	149.688	158.938	92.0262	150.524	185.912	160.436	187.222	150.365	122.172	170.912	10.4389	164.905	81.8786	59.1861	25.2611	55.521	57.8242	115.558	129.888	104.65	143.72	171.582	141.327	133.786	138.676	77.3404	110.39	196.308	24.7481	55.2969	28.5057	96.2022	173.662	63.0192	108.333	47.499	91.1083	192.027
ARHGAP33	330.556	387.554	343.353	454.081	384.937	269.038	373.891	387.846	303.895	296.528	353.299	144.239	413.845	370.503	340.286	319.744	318.583	395.452	246.353	449.194	416.034	274.986	240.14	359.192	408.212	377.537	406.506	204.474	341.414	291.481	370.408	295.84	24.6097	372.934	162.975	136.176	241.036	59.7842	284.857	312.856	88.8163	490.953	240.491	226.191	280.882	78.4768	347.204	73.2872	288.534
ARHGAP35	1431.75	1405.31	1447.91	1382.2	1723.37	1320.68	1340.88	1123.64	1314.48	1156.22	1343.3	1100.74	1367.73	1333.94	1113.59	1361.87	983.792	1328.26	1497.05	1380.29	1106.67	955.897	1145.31	1037.19	1351.76	958.587	1926.45	1041.11	1103.05	1073.68	1081.74	927.959	1287.01	1009.82	1230.71	1470.81	766.643	1429.97	1268.8	1280.29	956.412	1149.57	1287.18	974.358	1345.12	1213.99	1450.18	1018.49	1234.34
ARHGAP36	9.49474	8.99373	40.1694	2.99509	2.34628	7.55959	4.40572	14.9799	32.8472	34.024	6.25603	8.14871	6.1412	7.31523	7.14417	4.31987	5.44125	3.6122	6.55896	3.41288	5.00793	4.21143	5.76911	6.93105	2.40886	3.51323	3.00938	9.62907	8.19772	8.67419	6.3882	7.20881	49.7108	23.0857	2.23383	9.08122	9.25836	5.22073	5.57732	6.8816	4.40114	1.80064	21.9476	9.9156	13.0728	3.26104	3.41499	75.5448	7.3738
ARHGAP39	115.091	106.753	127.146	87.7623	124.828	104.732	101.736	129.641	101.993	116.411	75.3547	79.3181	19.0058	88.476	103.733	86.6419	138.032	65.1727	86.6838	156.123	67.115	134.337	93.135	113.161	116.205	134.637	90.6266	134.297	68.8192	113.507	125.409	96.9336	120.177	79.7743	117.432	92.7756	173.699	131.286	90.7177	90.0458	81.5448	127.182	100.577	93.017	46.63	20.6012	120.48	107.078	71.5647
ARHGAP4	1618.07	1329.03	1418.77	1366.8	1288.01	1470.06	1354.87	1205.1	1504.61	1476.14	1436.63	1244.92	1390.99	1259.3	1348.03	1345.29	1419.92	1357.52	1612.02	1496.32	1072.25	1435.64	1314.4	1232.09	2042.5	1299.72	1387.68	1162.81	1383.09	1182.82	1262.55	1228.06	1351.34	1772.94	1162.94	1359.19	1104.14	977.96	888.509	1429.31	1267.93	1007.34	1335.93	1125.98	1466.83	1280.32	1508.41	1521.37	1787.05
ARHGAP42	8.72235	44.5534	6.73624	6.27621	8.87196	54.3015	6.24179	74.4997	40.7868	38.2923	9.06808	26.715	18.4953	17.1957	33.7399	8.07757	58.3031	10.1588	9.57444	14.7355	55.4091	14.7481	13.644	6.23943	80.3804	22.809	15.5123	9.34462	16.4303	4.92252	8.78859	8.21347	8.74782	15.4725	48.927	54.7906	15.2743	87.4216	15.229	7.37754	15.0296	9.61734	21.1237	32.4468	5.98162	9.9896	43.5458	7.27033	10.781
ARHGAP44	199.21	279.191	213.959	187.581	255.718	201.045	220.064	162.024	225.001	247.366	249.306	289.489	351.614	318.671	326.235	278.831	251.677	331.148	220.627	335.942	345.238	169.396	183.233	180.486	342.793	242.306	154.631	380.043	268.458	278.681	382.325	115.599	199.941	181.8	246.631	189.901	175.558	242.812	188.748	376.837	197.409	163.369	231.77	168.405	286.769	229.34	247.36	187.342	296.649
ARHGAP5	507.127	685.253	554.223	594.467	424.622	565.55	677.876	503.649	558.713	481.25	553.362	624.793	855.459	699.075	797.595	647.319	702.986	563.203	634.492	919.73	351.806	525.215	298.671	493.326	370.763	411.874	546.18	396.22	880.103	655.904	829.072	531.51	101.884	207.761	250.115	115.714	675.222	334.422	248.751	203.666	151.816	162.823	113.199	462.832	285.183	176.448	96.6834	129.14	315.282
ARHGAP5-AS1	151.273	193.429	150.023	116.423	187.615	144.176	112.862	131.146	131.354	167.452	167.184	26.9334	242.879	160.612	142.769	197.387	180.482	290.676	85.6601	115.722	216.723	177.106	169.388	104.728	132.848	88.9909	117.033	157.999	184.184	163.822	169.505	67.1351	25.0138	28.5278	160.496	143.789	132.726	130.06	105.089	124.704	139.88	129.239	75.2671	43.0475	123.533	13.5453	139.014	133.496	252.202
ARHGAP6	467.37	534.619	761.116	356.173	197.706	410.696	374.663	531.771	870.379	1386.59	429.07	393.402	229.573	309.267	349.512	297.139	467.313	369.631	559.493	655.87	516.856	333.601	977.356	683.537	107.256	291.708	145.273	216.652	155.799	275.885	419.852	397.015	274.529	484.819	102.727	174.016	819.946	632.589	331.061	70.9721	328.894	518.774	208.559	266.39	256.82	413.673	217.523	231.031	181.557
ARHGAP9	6479.86	6190.99	7559.63	6568.14	7991.21	6484.69	7349.19	8023.74	6332.88	6467.03	7313.44	6443.9	6519.29	6794.9	7088.13	6383.36	5651.94	6952.31	6699.52	6677.97	9201.5	13634.1	7777.04	8082.59	7325.22	6094.22	8485.66	5989.71	7378.95	7219.08	5982.58	8514.11	11753.8	12656.5	12945.5	10367.9	7024.52	10621.8	13017.7	8169.9	7307.23	11102.5	15294.4	7257.26	9091.58	10781.4	9771.61	11297.4	7903.9
ARHGDIA	2705.9	3350.39	2653.26	2695.36	2464.1	2768.14	2253.29	2724.42	3280.7	3368.03	3080.88	2527.35	2417.9	2489.57	3062.84	2563.33	2744.74	2581.12	3509.16	2822.91	2922.12	3027.66	3984.96	3158.48	3746.84	3143.71	3041.43	2242.91	2539.1	3174.32	2683.96	2857.94	2706.26	3569.66	3127.92	2636.45	3512.73	2817.59	3115.65	2571.07	3156.59	3239.56	3897.19	3960.01	3927.21	3559.36	3824.4	3335.38	3099.07
ARHGDIB	22275.4	28295.2	25899.2	21586.8	23139.3	23804.8	27484.7	24977.5	22380.6	23478.5	27440.7	43372.2	26350.8	28742.3	26510.7	21832.3	23973.6	30957.8	29027.2	25099.7	22312.2	26582.2	31698.4	24405.1	24524.4	22187.2	29954.8	26892.3	20738.6	24476.8	18296.1	19279.5	40604.2	45641.9	40483.3	45304.9	26919.1	25147.8	36595.9	40304.4	42093.3	43722.9	50020.1	47818.2	44201.1	48552	38676.4	37313.7	54678.1
ARHGDIG	198.245	183.609	178.133	159.446	84.1803	191.761	103.069	141.439	156.996	146.85	176.964	162.933	76.6485	18.6835	171.918	125.553	100.311	92.6525	171.795	95.6643	194.884	181.189	149.902	47.9171	147.521	166.935	151.223	227.843	186.416	174.062	197.258	168.492	187.662	143.959	252.821	91.6534	77.9894	39.6751	147.664	191.35	247.038	231.625	100.82	281.194	277.187	144.784	214.653	311.837	225.997
ARHGEF1 /// LOC100505585	2307.88	2110.58	2033.71	2139.18	2255.21	2109.19	2325.23	2393.49	2486.61	2341.33	2490.42	1660.59	3072.39	2236.19	2176.57	2427.68	2082.9	2144.4	2562.73	2434.93	2294.11	2665.65	2561.96	2190.67	3286.37	2609.57	1955.02	2067.46	2297.4	2119.85	2220.2	2067.81	1903.38	2584.51	1925.02	1994.88	1304.79	1897.7	2254.82	2211.91	1656.23	1578.89	2646.2	1789.57	2307.55	2155.57	2627.57	1502.51	2070.81
ARHGEF10	133.169	176.502	1380.44	115.292	131.282	68.8731	183.762	71.6283	133.196	75.3651	15.9306	176.385	103.901	149.298	143.564	93.183	27.289	108.618	212.353	153.458	93.0462	89.3757	12.2174	13.1263	119.102	134.52	31.6658	20.0844	89.6614	83.1571	101.776	62.3365	40.5055	110.072	25.3078	50.8825	71.3009	89.1378	72.643	116.007	11.1833	182.383	55.4395	179.601	70.9344	153.25	42.3219	118.326	130.548
ARHGEF10L	630.156	618.935	470.655	564.429	559.696	680.85	597.494	762.963	788.619	1198.64	1029.11	601.611	723.521	628.408	843.383	556.191	752.064	803.099	933.661	593.071	910.941	242.51	930.395	1035.17	1268.9	650.458	516.444	643.337	897.84	760.217	986.503	675.431	1190.23	616.682	687.925	666.126	887.687	506.153	709.005	506.092	614.66	634.643	950.475	429.06	683.425	1178.9	617.508	1330.75	705.54
ARHGEF11	610.357	668.398	468.234	502.5	551.614	681.574	531.4	624.173	643.121	668.271	726.993	418.513	567.225	628.064	653.229	632.723	717.69	559.247	660.729	380.186	795.681	1183.5	790.117	1061.67	907.578	725.772	574.404	459.573	468.873	793.108	628.132	706.29	874.27	698.468	686.219	809.027	621.257	532.128	567.026	423.467	568.827	567.057	750.28	607.841	662.399	685.288	711.111	918.769	658.995
ARHGEF12	794.161	1041	817.121	561.996	545.965	675.665	651.891	955.296	1009.14	1300.18	553.291	929.724	519.569	823.454	779.759	624.662	988.435	545.305	951.744	864.915	761.055	790.728	1260.02	1021.2	356.302	383.85	574.137	748.489	397.973	319.2	481.954	652.793	416.447	678.681	317.334	433.783	1447.74	1182.69	428.713	434.797	605.272	910.607	543.245	467.368	521.318	701.476	670.094	1267.24	829.923
ARHGEF15	170.431	216.09	113.103	150.837	106.228	19.319	26.5303	111.164	61.4802	123.394	49.6597	185.874	120.349	84.5653	100.657	125.379	172.369	162.578	207.263	93.3942	178.901	104.971	147.308	178.267	117.115	148.445	122.248	117.15	133.127	63.1906	65.7281	141.484	129.637	71.7776	51.35	133.011	48.4474	90.1335	165.449	230.975	166.497	137.259	115.742	164.311	245.554	171.75	135.687	142.876	267.48
ARHGEF16	60.1593	86.4751	29.0587	180.628	42.3235	145.424	31.4577	118.625	42.7497	42.3902	190.118	53.0815	99.902	47.5566	179.618	60.6033	129.615	76.8291	82.3099	111.303	159.078	126.029	167.413	136.871	63.1003	67.6997	79.5309	118.09	123.12	46.7788	147.019	219.303	145.979	207.297	168.57	32.1209	141.322	86.9903	206.925	252.006	180.716	197.627	148.489	278.205	272.027	197.322	161.546	361.086	93.6725
ARHGEF17	23.6422	21.3828	31.816	15.5759	24.7575	32.3058	77.189	12.11	29.8363	79.6153	36.3642	33.6884	41.7727	35.4284	115.842	37.0113	26.9127	82.1437	30.8694	30.2048	36.5693	29.9717	15.959	42.7065	34.084	36.7502	18.6444	43.3634	38.5537	35.0941	39.8608	82.0889	21.4501	100.816	99.5843	12.6236	27.0489	36.209	36.8097	44.695	15.1796	200.371	12.5355	45.1252	31.8532	33.4375	84.7073	19.2178	71.1099
ARHGEF18	5070.26	5640.7	7512.96	5851.82	5963.13	6382.15	8129.82	3664.38	5884.44	4460.21	4915.05	3468.93	5126.34	5349.96	4821.19	5053.6	4580.93	4273.97	5403.73	6388.47	3626.45	6411.64	5794.22	3655.23	5972.55	6624.77	4281.87	4881.86	6085.8	5493.02	4390.9	4412.23	5619.59	6628.69	6819.26	6655.08	5406.85	4324.22	6738.19	7172.28	6315.45	3703.33	4990.42	8240.75	7192.99	4464.17	5810.91	5861.4	9276.11
ARHGEF19	91.1944	121.102	207.07	113.122	144.521	129.613	167.585	77.4046	198.94	128.853	108.791	12.4989	107.039	57.7438	76.134	77.0866	55.4939	85.8373	42.5544	154.134	46.008	35.0376	149.833	55.6335	155.297	129.746	109.486	126.36	150.109	90.4418	49.8162	99.8284	97.3345	110.125	10.7754	106.752	15.3338	129.355	93.0767	62.0514	19.2977	122.997	7.8246	183.734	208.071	98.8013	239.393	195.997	239.59
ARHGEF2	3835.02	3737.11	3403.49	3448.64	3811.08	4322.32	3997.16	3653.25	3638.06	2524.77	3959.01	4094.01	3333.78	3994.02	3430.55	3516.97	3696.55	2895.13	4340.8	3537.8	4342.38	4565.96	5383.39	4898.6	6294.08	4628.13	3413.1	3303.78	4387.03	3720.69	3635.21	3492.45	5959.81	4751.95	4880.08	5092.24	5322.59	3478.43	5284.85	4710.45	5199.92	5582.13	5590.13	3060.72	5061.26	5450.66	4055.13	5712.13	4958.03
ARHGEF25	52.4108	145.32	72.6532	41.5919	46.7675	40.8661	104.499	36.9396	74.9502	93.3105	114.467	71.9362	213.855	154.586	107.657	31.7843	48.7692	170.46	73.0111	129.665	120.513	29.5917	90.2001	46.6987	85.8132	29.8439	32.9264	37.7774	44.8309	26.1788	123.528	64.3952	30.4769	58.4324	159.165	17.6388	48.8336	65.9587	64.2659	195.457	78.6781	32.1334	84.1379	36.9	120.739	108.103	94.0986	74.7433	32.9739
ARHGEF26	119.275	80.7735	122.125	139.593	115.689	112.14	94.2868	105.772	52.5153	49.5784	94.3269	7.28014	204.955	125.019	195.972	141.548	106.333	65.7499	79.9888	114.924	76.0986	96.0684	101.34	37.4743	85.0468	155.182	37.6638	40.9943	85.787	69.4821	95.9141	6.06986	43.2485	23.8843	63.373	51.0099	109.396	93.5326	15.6344	89.3344	59.1006	50.2608	58.17	38.9899	9.31912	32.4428	65.2546	47.0714	132.78
ARHGEF26-AS1	29.4755	3.64478	4.9026	5.42513	3.67095	5.76631	17.3101	21.6233	5.93313	26.2194	22.2183	8.63828	20.0535	48.61	28.6987	7.02994	56.3402	11.0312	8.74106	61.4893	59.9695	3.43236	29.2632	2.45279	3.24379	43.3866	55.8682	5.36274	20.475	17.2505	12.2654	25.6825	41.0035	6.93195	28.2304	22.1363	6.53119	7.82357	7.83927	72.4313	2.04113	3.39603	7.08909	10.9338	35.157	11.3052	42.3356	1.50545	32.8872
ARHGEF28	83.4887	302.008	215.727	163.601	254.137	233.882	151.992	187.324	182.944	159.623	434.573	37.3839	80.3992	122.211	143.484	191.753	299.829	309.269	271.055	140.629	167.128	287.681	279.409	212.93	149.276	213.434	213.869	335.419	80.3896	54.7653	198.425	212.868	82.2378	155.226	31.4703	78.5895	124.911	371.392	46.1822	104.486	140.815	226.11	122.247	102.646	26.166	79.695	128.389	161.356	104.463
ARHGEF3	5597.86	5455.45	4721.69	5131.32	4936.04	5601.72	5663.45	4840.38	4972.51	3813.87	5631.44	5200.14	5761.87	6066.45	6149.4	5996.42	4419.71	4313.82	5888.84	6803.03	4605.36	4799.07	4768.98	4591.26	4536.02	3952.67	4638.7	4957.44	5303.62	4416.4	5077.52	6197.92	2968.76	4260.92	4026.51	4682.86	5519.93	3750.04	3645.2	4668.57	4075.29	3642.23	3239.04	4201.09	5474.06	3790.61	3340.12	3172	4436.78
ARHGEF33	21.8791	21.4321	30.1343	48.0853	27.9024	58.8743	5.16673	2.51472	65.5192	30.7719	90.0588	53.1047	86.0746	94.8951	68.9875	75.9789	59.2491	94.8301	93.5212	51.2143	52.9432	27.4976	61.7671	57.0857	4.84295	15.524	54.5629	32.7438	90.7907	45.9592	51.822	40.0344	65.7044	60.7413	45.83	33.8577	9.74915	63.321	36.5015	32.3645	58.8259	53.7064	60.3509	13.2127	15.9111	5.16693	12.122	26.2615	60.5036
ARHGEF37	67.4772	84.3974	20.0022	103.612	95.2547	49.8261	96.7434	75.1523	34.8063	101.358	119.352	142.202	84.5916	157.843	103.788	76.6802	62.0965	135.08	82.3453	54.5523	82.0703	74.9458	73.4134	69.5402	90.6462	145.473	75.9708	79.32	79.8892	49.2366	60.589	139.948	126.589	76.8443	139.261	54.4793	102.118	87.7286	136.895	94.6102	104.61	65.4692	96.5795	127.47	157.424	124.548	108.484	191.227	173.414
ARHGEF38	124.381	52.2826	24.2878	76.2154	92.3232	55.3804	56.778	94.9685	170.848	50.2412	14.5285	38.3656	16.9717	203.427	116.016	115.347	21.7894	171.084	13.9298	62.5445	94.4098	54.5367	186.266	88.5767	21.378	58.3307	21.5062	83.5031	203.703	148.173	13.4164	17.6027	107.826	38.7549	80.2779	56.325	12.2426	20.7667	135.385	122.794	100.009	89.8878	108.018	142.068	28.6599	128.122	17.3508	80.4535	34.1601
ARHGEF39	12.4462	83.6088	89.5689	33.6958	25.0386	35.2312	53.7059	6.60981	107.919	57.0549	33.625	70.3361	103.447	64.0572	14.7648	100.741	13.5686	74.928	101.025	47.7074	38.3159	9.83947	56.5179	25.9704	84.1935	17.0218	12.6666	45.3591	15.9494	6.75214	34.5419	13.2747	77.3574	87.0945	12.8861	79.3916	36.8771	146.584	20.1088	123.834	79.3593	9.83039	30.0567	111.853	36.5586	26.898	147.068	38.2459	47.2445
ARHGEF4 /// LOC101930241	66.9606	120.964	86.016	50.062	60.0853	118.48	56.0288	29.5733	54.991	54.5773	26.8867	63.6879	91.7572	82.3417	80.87	91.4379	68.6174	94.6503	72.6084	91.113	31.7928	24.7485	8.26404	47.3297	64.5015	91.5967	127.054	23.1272	109.954	52.8968	36.6747	8.12124	23.3563	92.0712	13.109	118.122	81.348	82.0498	37.0164	85.7646	91.812	28.1432	47.4655	45.2696	107.135	143.859	31.9941	44.0638	129.53
ARHGEF40	1246.15	817.728	689.342	1132.83	832.986	1260.84	491.518	1217.17	944.754	1160.03	1298.77	895.138	884.312	836.606	929.59	981.597	1072.82	914.017	1590.02	766.748	1736.18	2261.53	2074.94	1751.9	1724.04	2068.94	1281.47	1012.46	1115.2	1350.64	1704.33	2204.65	3743.25	1452.74	1218.2	1657.5	1130.89	2400.56	1577.12	932.254	1113.82	2406.83	2333.49	592.957	760.778	2142.92	1902.96	1809.92	719.467
ARHGEF5	94.2669	51.8615	48.5497	104.771	33.3121	17.051	178.852	21.6174	64.6614	50.1332	22.6158	84.4564	53.7402	39.3635	56.8893	137.865	45.533	43.7582	41.4925	108	39.5523	29.7709	29.4541	21.8135	41.7702	25.773	45.0051	44.2632	106.175	19.7359	24.7772	29.1718	36.7384	57.2471	162.808	75.9147	13.3408	29.8718	135.373	171.873	169.172	120.676	32.6689	48.6077	194.072	98.0692	166.934	69.7891	229.851
ARHGEF6	4621.11	4606.47	3974.09	4563.69	4964.68	4401.93	4810.99	3735.58	3980.25	4017.96	4204.36	4589.53	4817.71	3162.32	3972.91	4267.94	3666.87	4773.04	4138.46	4117.6	4064.44	3293.81	3391.91	3698.7	4523.51	3696.06	5183.69	3845.08	4785.14	4407.17	4553.08	3649.5	4372.69	4071.8	4201.83	3995.15	3773.99	3848.66	3999.53	4072.99	2863.63	3705.24	4306.16	3444.62	4691.74	4324.53	3412.4	3294.07	4788.28
ARHGEF7	1723.01	1497.52	1908.04	1614.59	1775.27	1420.68	1733.53	1594.38	1498.4	1376.98	1582.43	1253.22	1867.5	1599.19	1865.37	1793.54	1470	1358.17	1749.75	1753.6	1636.37	1586	1564.21	1521.86	2123.62	1649.27	1595.92	1423.95	1949.76	1379.09	1628.92	1519.17	1603.53	1391.7	1813.66	1461.01	1109.9	911.68	1738.1	1822.53	1525.9	1618.93	1444.69	1512.38	1442.99	1586.95	1670.92	1680.37	1898.15
ARHGEF9	417.191	547.453	407.33	375.754	428.28	408.461	459.387	370.783	453.219	329.43	341.898	595.486	419.699	397.354	352.891	358.082	373.23	359.925	432.686	491.556	389.855	402.639	352.689	145.412	387.729	413.377	360.385	304.896	458.604	423.5	488.415	382.588	149.309	427.253	231.452	195.479	316.683	288.173	235.538	304.831	231.144	62.3918	223.297	255.713	218.692	245.111	399.233	271.684	299.816
ARID1A	4161.13	3352.43	3634.98	3971.53	4149.13	3706.65	4173.02	3383.2	4717.84	3911.01	5561.26	2740.9	4796.6	5334.98	5909.17	5380.92	3653.52	3312.67	6513.12	5411.6	4216.28	4681.35	4469.22	4484.49	5333.95	4694.19	5295.41	2399.9	3205.14	2733.27	3177.64	3151.24	1615.72	1628.99	1600.62	1663.16	1532.06	1515.3	1770.19	1856.54	1852.06	1827.59	2124.68	1274.59	1817.14	2026.44	1854.9	2028.64	1842.01
ARID1B	1689.92	1090.52	1905.07	1693.14	1674.65	1409.89	1615.13	1448.61	1735.6	1366.73	2159.82	1551.87	2027.55	1945.25	2046.17	1855.48	1898.76	1882.66	2176.66	2292.52	1448.94	1602.36	2175.38	1254.69	2280.79	1459.02	2179.23	1569.67	1788.71	1422.69	1619.56	1332.11	838.239	1071.52	1405.1	1247.62	1105.71	1181.8	1294.18	1314.45	839.81	1236.43	947.396	849.986	1268.66	1137.99	940.283	823.562	1006.6
ARID2	815.817	353.848	806.786	1250.76	949.046	547.69	594.1	931.769	968.986	944.117	844.565	265.836	1073.94	675.453	1056.27	1167.3	905.786	1052.57	806.912	877.371	796.217	703.802	814.304	634.66	715.266	527.69	744.211	296.486	318.113	468.858	481.377	271.373	124.345	338.978	294.988	300.366	599.412	612.023	356.244	475.971	304.801	439.267	347.65	195.921	528.363	272.852	572.897	288.357	508.634
ARID3A	596.522	497.032	349.354	461.645	326.834	588.811	445.131	559.037	573.177	767.946	721.479	301.116	632.26	480.312	574.924	984.26	551.927	434.774	466.066	375.777	611.827	720.981	591.631	533.535	953.939	564.969	787.578	456.386	524.535	607.274	650.92	714.62	626.978	555.844	633.046	702.471	573.29	526.594	601.639	584.607	639.795	1233.35	924.032	438.973	472.214	677.103	897.82	737.193	347.788
ARID3B	617.917	537.561	626.094	494.186	561.931	770.632	658.058	568.386	538.898	514.288	630.942	544.913	757.255	669.219	498.461	590.365	534.565	486.23	593.18	712.514	502.899	740.812	591.011	584.607	489.083	570.709	605.279	558.569	425.018	585.338	532.601	541.408	331.361	425.647	509.833	571.496	618.146	156.966	559.443	432.987	415.696	424.138	315.418	574.287	649.271	481.929	566.545	477.414	466.313
ARID4A	985.706	934.789	1129.74	1085.4	1088.26	1012.98	1095.52	1196.35	1180.68	916.896	827.14	702.798	1149.28	925.779	1121.79	1300.66	1039.06	1010.59	864.185	1050.67	1012.88	1351.96	793.704	1017.94	940.967	1089.68	993.918	760.712	1066.38	857.839	971.687	981.36	861.961	474.431	642.355	699.396	650.576	813.841	936.923	955.708	587.711	645.538	608.342	482.412	742.599	591.57	664.683	555.693	704.932
ARID4B	3674.06	3620.02	3185.55	3428.23	3667.07	3329.33	3361.71	3343.81	3093.08	2698.04	2634.97	2318.05	3381.53	3166.84	3066.33	3418.08	2986.12	2381.85	3174.1	3261.77	3153.41	4980.42	2463.95	2992.74	3130.52	3352.35	2726.39	3267.5	4608.03	3784.7	3687.92	4196.51	2170.45	2564.09	3659.02	1923	3945.22	3193.6	3106.89	3272.65	2682.88	2124.51	2180.1	2908.17	2372.43	2111.34	2229.25	2514.55	2789.85
ARID5A	596.445	645.013	471.315	562.953	621.804	719.635	561.47	652.928	558.946	503.39	481.299	512.678	557.248	552.234	553.369	532.606	491.74	511.302	508.143	655.785	553.134	807.205	623.562	426.845	582.7	692.149	576.334	657.84	505.594	618.195	482.141	781.154	411.531	721.876	510.183	304.809	385.291	526.298	416.824	487.592	364.387	387.683	568.916	434.65	458.414	463.951	812.651	465.46	311.315
ARID5B	2114.48	1731.77	2259.55	2207.03	2610.57	1719.17	2431.57	1897.93	1658.33	1097.05	1761.03	1405.34	2414.6	1682.97	2247.63	1677.8	1516.24	2522.46	1844.2	2470.59	1725.92	3101.71	1272.41	1264.3	2378.92	2003.63	2499.56	1751.52	2236.09	1483.03	2044.56	1562.75	1210.35	2559.82	2463.09	2119.78	3454.58	2089.08	2478.33	3188.86	2493.44	652.715	1973.82	5491.87	3815.37	1139.17	2397.27	1572.23	3240.95
ARIH1	523.579	543.058	616.33	539.328	597.374	594.454	649.534	681.965	610.197	628.958	515.721	620.865	635.166	522.317	491.881	580.738	596.789	551.446	482.422	652.548	606.664	493.895	375.439	467.635	387.69	597.456	564.268	462.545	502.195	376.481	421.729	434.528	507.096	572.384	508.239	551.429	434.906	404.854	589.434	627.615	606.314	426.855	366.084	634.72	499.55	524.525	671.782	401.627	504.385
ARIH2	1049.52	1390.49	1568.16	1257.35	1410.94	1367.39	1576.12	1254.24	1605.1	1416.74	1537.51	1850.26	973.024	1165.11	1512.34	1132.67	940.509	1461.01	1441.36	1504.58	1107.9	1226.11	1264.51	1129.08	1591.19	1184.6	1657.61	1310.69	1266.1	1248.17	1184.1	1912.88	1070.77	1485.79	925.972	959.731	1639.88	2035.14	1201.98	1059.83	1088.67	1073.09	986.015	1069.01	1222.24	885.448	1104.86	1407.29	1229.36
ARIH2OS	127.678	149.161	211.432	269.131	292.636	186.311	218.703	148.948	158.467	149.173	82.6352	148.258	196.065	10.3556	188.504	169.83	76.5291	270.548	108.397	162.056	132.744	5.84067	213.877	37.6859	186.325	170.553	123.936	127.249	206.904	123.068	175.084	175.262	138.623	184.238	104.198	27.7192	137.498	169.708	111.137	81.2295	103.151	151.714	136.366	108.669	103.245	127.977	163.448	76.317	122.826
ARL1	792.872	842.967	660.491	651.609	727.8	810.196	795.342	747.326	757.389	821.979	696.918	856.717	779.413	599.177	665.808	626.38	731.669	815.729	554.403	697.846	520.589	494.314	583.8	923.217	799.698	620.956	681.269	1079.35	755.175	688.322	668.508	646.038	720.686	536.666	648.641	448.274	569.987	641.369	556.101	786.223	926.948	536.972	512.41	681.027	787.926	616.979	663.035	662.988	589.215
ARL10	543.877	482.799	446.387	512.123	519.875	355.786	437.222	374.111	379.624	222.496	306.826	327.637	605.832	452.531	500.084	462.201	498.072	435.652	496.155	616.626	311.578	448.174	236.766	208.672	394.35	308.162	335.479	218.165	467.339	336.449	317.424	255.418	264.805	265.07	535.608	491.154	288.703	178.376	550.143	562.664	199.724	160.052	348.412	573.112	423.098	317.303	181.139	313.644	630.043
ARL11	1216.01	1331.07	882.89	1112.87	1278.09	1787.19	1214	1756.63	1332.75	1728.69	896.514	1481.67	1006.33	1850.63	1232.61	1383.11	1798.57	718.606	1395.2	814.202	1924.66	2521.27	1894.63	2220.51	1584.17	2163.2	662.134	1095.17	1177.97	2025.39	1989.55	1809.47	796.175	359.061	804.211	579.708	1500.03	785.795	915.058	297.64	696.215	1003.79	1026.36	482.357	551.016	1002.77	569.893	741.528	460.37
ARL13B	280.695	162.71	274.087	308.399	181.997	202.887	263.4	276.346	247.259	243.824	185.379	242.572	268.652	278.526	196.211	230.325	256.003	116.412	313.226	410.428	235.532	210.867	226.72	288.751	200.73	283.305	148.439	241.655	362.461	285.102	270.505	220.855	142.571	81.5392	181.125	179.285	275.203	207.404	145.44	75.4522	167.495	159.894	90.3071	196.687	69.1854	219.083	127.679	203.379	110.931
ARL14	5.22276	37.3145	11.5247	17.3012	1.97393	10.9148	7.10611	2.2282	3.38029	5.12292	30.9752	9.07947	48.4855	33.1245	5.90578	14.0272	8.62534	47.8401	28.5943	10.8861	6.66036	5.06726	7.01351	10.221	4.43013	5.9431	3.56736	14.0081	24.8968	9.7967	21.7859	27.746	47.8919	3.18796	55.6998	30.7277	30.0411	1.8764	22.9867	3.24704	5.92423	7.39641	15.1952	8.98044	2.62378	5.37248	2.09452	1.57634	10.3577
[truncated: 18,741 more rows]
[truncated: 32 more columns]
