# Supplementary material for: Exploration of Potential Integrated Models of N6-Methyladenosine Immunity in Systemic Lupus Erythematosus by Bioinformatic Analyses
Source: Front Immunol. 2022 Feb 7;12:752736. doi: 10.3389/fimmu.2021.752736 (PMC8859446; doi:10.3389/fimmu.2021.752736)
Supplement: Supplementary Table 8 — Datas of the gene expression of GSE81622. [file Table_8.xlsx]

## Sheet: Sheet1
Tag	GSM2159829	GSM2159830	GSM2159831	GSM2159832	GSM2159833	GSM2159834	GSM2159835	GSM2159836	GSM2159837	GSM2159838	GSM2159839	GSM2159840	GSM2159841	GSM2159842	GSM2159843	GSM2159844	GSM2159845	GSM2159846	GSM2159847	GSM2159848	GSM2159849	GSM2159850	GSM2159851	GSM2159852	GSM2159853	GSM2159854	GSM2159855	GSM2159856	GSM2159857	GSM2159858	GSM2159859	GSM2159860	GSM2159861	GSM2159862	GSM2159863	GSM2159864	GSM2159865	GSM2159866	GSM2159867	GSM2159868	GSM2159869	GSM2159870	GSM2159871	GSM2159872	GSM2159873	GSM2159874	GSM2159875	GSM2159876	GSM2159877
2021-12-01	125.572	127.361	127.47	124.267	123.992	125.782	120.855	115.575	126.629	122.598	129.255	123.5	110.329	128.887	114.13	119.826	118.332	120.217	129.183	128.47	126.643	118.253	113.808	120.727	120.056	119.695	123.58	127.941	120.955	113.817	122.532	129.156	127.536	119.708	127.622	123.174	118.564	119.969	124.278	117.574	121.497	124.916	121.15	127.449	120.098	127.748	117.106	130.124	124.505
2021-03-01	420.232	229.787	378.215	395.051	384.673	391.812	347.514	309.997	313.876	192.221	400.712	343.951	703.94	623.954	594.839	616.85	451.944	444.42	414.481	239.258	315.921	314.617	442.855	473.87	428.972	415.372	408.158	583.64	646.666	449.52	278.661	472.016	560.722	509.404	620.794	608.729	503.13	357.373	351.471	508.136	259.67	324.148	436.548	477.068	566.729	541.394	554.375	394.033	1073.62
2021-03-10	118.417	120.297	117.077	121.824	123.655	116.515	122.492	119.431	122.533	130.018	123.547	123.011	117.923	122.425	118.795	124.991	124.312	118.792	112.079	127.251	120.623	118.656	128.069	123.775	119.417	123.377	116.53	118.277	123.902	116.88	118.05	124.273	113.733	122.318	115.984	118.838	126.949	124.949	122.455	118.412	118.746	118.783	120.502	120.86	118.294	120.629	132.714	124.901	118.603
2021-03-11	115.532	124.163	120.889	123.107	116.758	117.136	121.141	113.061	111.666	127.8	120.68	121.384	114.652	116.076	119.792	122.497	116.655	120.241	119.462	121.321	117.711	118.868	119.457	114.204	115.348	118.412	123.408	125.866	116.762	112.198	118.693	124.878	127.374	117.691	123.88	117.561	119.27	117.643	121.954	115.391	118.863	119.94	119.837	119.052	119.406	130.643	119.535	125.913	114.325
2021-03-02	315.614	403.857	443.723	531.564	477.528	286.759	382.158	303.327	166.081	150.422	515.18	599.237	422.592	585.861	504.001	318.023	407.575	696.331	593.823	585.436	537.406	407.255	580.496	526.432	410.933	401.99	367.13	434.463	253.625	572.895	302.96	375.868	715.354	306.223	379.444	403.672	407.522	1025.13	954.138	1092.55	594.036	715.386	732.209	651.278	134.798	331.947	402.486	448.025	198.918
2021-03-03	229.59	242.84	218.559	213.195	207.849	203.145	194.374	205.464	279.606	235.439	226.47	158.785	163.051	202.822	241.701	194.721	189.787	170.369	213.151	161.708	189.534	202.096	206.611	163.979	212.348	261.77	242.631	197.086	188.928	184.924	270.025	226.606	236.218	176.67	283.76	217.652	207.89	205.665	230.541	235.814	408.38	204.113	202.898	255.782	349.216	227.508	256.09	282.562	186.4
2021-03-04	111.541	118.03	109.648	109.013	111.27	108.972	121.595	112.681	122.021	113.053	114.809	112.984	118.986	113.323	111.573	121.754	114.838	114.472	111.971	113.338	117.697	114.893	107.236	116.346	111.225	111.748	112.408	112.61	116.48	112.289	108.993	108.65	117.98	116.681	120.168	115.165	112.617	112.286	115.216	112.695	115.553	108.267	109.781	109.2	114.506	113.035	108.001	111.611	122.181
2021-03-05	218.899	210.345	188.741	203.984	214.892	210.478	191.458	196.686	257.931	245.55	175.266	192.433	225.652	205.765	212.494	213.616	195.09	207.823	230.802	174.112	219.287	197.434	224.974	223.637	259.2	205.607	195.443	199.979	184.252	190.737	190.234	197.639	203.242	209.791	217.345	202.179	214.84	187.565	187.703	188.568	189.226	196.952	187.242	218.366	229.25	188.369	192.761	197.468	156.955
2021-03-06	1378.49	1587.76	922.228	1143.45	765.631	594.347	789.231	445.055	1247.77	2988.12	935.364	859.932	854.092	652.623	989.432	937.197	1094.36	1058.38	1248.23	711.845	598.318	862.454	597.303	714.893	900.524	761.901	684.415	587.236	657.574	583.415	744.795	558.856	593.869	710.546	468.229	580.041	517.798	976.901	842.785	782.42	985.123	555.109	363.912	696.981	963.128	731.866	723.851	1363.38	877.457
2021-03-07	1878.76	1590.59	1767.69	1686.63	1581.54	1294.98	1781.88	1682.35	3172.08	2555.59	1852.26	2139.62	2717.52	2091.41	2334.21	2492.38	2334.21	1624.78	2283.97	885.306	1813.56	2423.76	2418.4	2499.19	2186.85	1212.42	1202.9	3108.88	1970.49	1899.99	2558.93	2275.91	2152.8	2387.75	3621.44	2095	2724.17	2155.75	1701.61	2387.75	1395.83	981.126	786.981	2202.98	4228.54	2788.22	1800.19	1600.83	2788.22
7A5	124.326	119.002	123.831	117.324	119.743	114.146	126.361	125.5	120.042	129.146	116.853	126.416	119.106	124.961	125.617	117.006	122.869	131.305	115.779	127.449	120.666	123.804	121.871	122.498	114.37	128.697	126.636	119.417	123.185	131.285	129.028	127.93	116.279	120.38	124.001	120.552	119.966	116.593	123.34	121.359	117.624	118.584	120.411	119.448	131.181	124.464	127.608	114.912	130.762
2021-03-08	135.361	130.164	136.225	128.887	135.939	142.035	141.767	131.397	129.435	127.208	117.135	130.997	124.457	134.077	123.592	124.123	132.098	120.065	127.801	131.382	132.479	138.968	141.153	138.091	123.712	138.175	132.685	122.113	132.29	123	125.935	130.847	130.291	127.768	127.397	122.704	142.095	139.616	139.57	124.598	219.736	136.404	130.365	128.672	124.635	126.508	131.544	130.954	114.126
2021-03-09	168.659	152.713	158.991	148.366	154.276	153.476	139.685	145.005	165.522	170.865	142.813	146.657	145.255	148.57	142.143	150.116	156.815	146.544	143.173	130.028	144.797	152.729	140.844	145.797	138.649	135.263	127.281	132.223	156.663	132.235	158.73	136.548	136.913	143.093	145.592	156.968	139.589	160.117	146.922	134.363	134.369	160.727	130	146.324	287.155	150.702	135.566	158.582	147.561
A1BG	129.817	130.874	141.865	130.418	124.599	135.848	134.587	137.539	127.372	133.253	129.103	126.602	122.504	131.758	119.308	131.732	128.474	131.623	130.152	129.536	124.005	135.333	121.923	130.518	130.653	136.712	128.786	139.762	126.483	117.468	126.383	133.435	129.511	123.377	120.104	127.915	125.659	129.794	133.7	124.877	127.849	133.524	157.745	128.732	133.052	129.283	125.22	127.167	135.987
A1CF	124.274	122.044	120.221	118.135	119.041	124.975	124.603	116.695	128.51	122.927	119.965	120.328	116.14	117.725	117.44	119.127	122.453	121.518	122.365	120.944	116.226	120.626	118.851	129.833	120.162	122.127	118.996	117.279	122.363	124.893	124.548	121.854	119.108	121.735	125.555	116.448	117.054	117.828	121.435	119.68	125.123	119.832	119.106	127.431	119.863	125.694	125.763	123.5	124.346
A26C3	117.536	120.971	123.844	136.571	123.272	124.459	122.453	116.324	114.829	135.67	118.821	118.209	128.325	120.954	118.904	126.205	119.035	116.561	118.261	123.247	123.626	127.201	120.131	127.393	122.483	125.421	121.293	122.638	118.227	125.058	120.52	117.604	119.97	118.487	114.602	127.289	123.45	119.768	115.39	122.651	126.408	126.964	118.511	118.931	126.842	117.936	122.236	121.046	119.03
A2BP1	117.376	117.501	120.306	115.474	117.845	115.73	115.063	119.749	117.166	118.614	113.985	116.588	116.175	116.793	112.683	120.458	116.786	118.115	115.576	117.99	115.894	119.579	118.032	118.477	117.241	116.197	115.023	127.551	115.311	119.937	121.122	116.832	117.464	119.061	115.11	117.725	118.863	118.117	118.876	118.143	117.084	116.779	118.881	115.787	122.236	113.006	123.242	118.112	117.009
A2LD1	417.808	345.43	357.93	348.395	439.149	383.134	361.161	373.663	421.519	251.534	430.97	184.606	223.529	263.539	214.192	536.222	285.605	316.002	273.176	201.63	271.005	349.216	299.046	482.939	231.969	346.06	804.548	311.642	203.284	245.587	341.866	267.385	174.869	248.941	236.126	438.261	281.51	266.933	220.806	210.929	244.423	274.995	374.673	205.881	524.492	238.45	231.288	500.863	430.1
A2M	119.487	133.929	121.07	123.207	112.775	117.987	139.2	127.256	137.545	129.059	120.105	133.512	122.942	131.572	129.432	128.289	129.335	146.366	129.679	139.653	124.549	127.236	132.01	127.757	121.195	120.303	120.345	120.808	131.989	125.427	122.743	132.583	120.133	140.667	117.23	134.074	120.763	119.791	118.513	133.397	111.93	114.763	107.098	121.158	136.807	125.197	124.894	129.72	117.958
A2ML1	111.418	111.709	106.767	110.271	114.395	107.457	108.82	115.649	110.725	116.17	116.058	104.463	112.692	110.987	115.289	116.607	104.549	113.835	115.859	117.901	116.772	109.531	118.79	115.694	113.228	110.213	112.011	112.966	109.305	108.187	114.764	118.018	115.932	107.011	111.323	124.942	116.407	108.027	113.992	115.289	108.894	111.089	108.361	110.604	109.388	121.859	113.669	113.418	115.564
A3GALT2	122.448	120.597	116.728	121.254	121.328	122.228	116.668	124.043	116.954	113.306	119.788	127.499	117.729	124.625	128.186	120.978	118.133	115.828	120.278	112.575	120.039	122.764	130.704	118.589	123.24	121.444	115.246	108.909	116.469	114.635	113.987	121.767	121.006	121.334	114.497	116.247	113.492	128.137	125.558	117.915	129.503	118.472	117.807	120.377	130.054	113.874	117.938	114.728	126.23
A4GALT	114.562	117.053	115.323	119.034	121.193	110.716	113.599	121.342	118.725	111.799	119.54	111.952	124.152	119.98	118.809	110.842	118.201	118.585	121.154	113.176	108.372	116.525	119.567	118.252	125.358	111.67	113.271	113.995	118.78	115.885	115.945	119.732	117.378	109.262	119.704	127.588	120.273	126.234	115.732	120.051	112.263	116.406	114.411	118.837	118.307	115.444	117.208	130.143	116.518
A4GNT	130.721	130.438	134.261	137.132	130.738	124.005	132.341	139.736	128.529	135.49	129.833	145.783	137.663	119.937	125.208	138.541	131.881	122.606	131.47	120.49	120.693	132.848	148.311	124.493	132.31	131.75	128.218	129.246	141.294	125.127	130.091	125.255	132.975	125.184	139.26	136.558	125.935	122.821	122.818	118.173	135.998	130.783	125.281	133.182	129.273	128.011	141.332	138.904	164.073
AAA1	119.419	117.94	119.941	116.643	119.245	124.499	118.93	116.455	118.359	121.073	123.823	120.601	116.864	120	124.907	114.863	115.232	119.177	118.808	118.85	124.993	118.211	122.655	118.883	123.683	117.394	118.039	126.227	119.597	120.157	120.004	120.341	118.135	121.934	119.692	120.439	119.164	121.015	120.929	118.752	120.181	117.94	122.475	124.6	123.487	122.533	124.338	117.141	118.949
AAAS	147.136	148.57	153.497	146.948	163.253	161.002	142.355	159.066	163.526	162.437	175.602	179.508	168.153	175.743	188.414	150.289	151.383	167.511	167.936	259.062	170.131	171.18	191.767	163.624	175.083	150.81	182.744	157.152	163.245	180.155	172.44	189.722	177.25	162.282	170.417	180.911	159.678	199.77	203.793	157.866	186.102	192.113	205.592	160.371	182.495	181.543	176.489	184.632	143.35
AACS	162.147	159.678	178.049	165.226	173.22	165.414	176.331	174.869	141.775	130.345	167.916	145.502	156.815	151.529	151.383	160.033	175.518	160.15	156.87	175.773	168.047	166.638	181.061	157.895	168.204	144.135	169.403	149.805	168.912	150.718	164.157	168.941	148.681	180.334	159.266	151.497	143.326	137.709	169.403	161.884	156.578	174.292	164.484	153.149	172.463	146.828	160.974	167.247	139.197
AACSL	154.959	153.909	152.204	143.468	159.244	168.526	141.651	153.511	135.818	126.365	139.284	148.372	147.944	176.383	157.278	142.69	140.886	129.726	137.353	138.351	140.381	139.616	140.271	138.393	128.698	154.64	149.004	133.299	149.817	143.481	142.472	148.996	151.72	151.617	150.08	148.023	140.766	157.09	155.392	162.965	180.567	149.13	200.582	144.763	170.215	129.629	149.113	135.584	130.812
AADAC	128.634	119.693	123.204	120.446	128.39	126.311	124.713	127.258	116.475	122.017	123.85	126.11	124.353	124.261	120.601	122.225	117.746	118.369	120.904	122.844	131.016	123.016	113.294	117.44	126.971	119.432	125.088	129.888	118.571	124.084	116.688	119.631	114.12	127.334	120.89	125.226	123.078	123.259	124.203	118.264	122.865	122.346	115.684	123.994	117.385	129.458	113.742	117.976	116.628
AADACL1	283.099	257.734	320.117	298.432	284.485	314.231	282.561	298.971	355.987	287.034	270.157	342.615	348.508	299.652	322.562	307.026	300.796	312.763	344.036	299.79	333.999	378.902	355.809	370.757	347.851	364.349	342.139	439.675	363.787	313.089	267.511	375.798	406.219	351	315.003	311.371	373.202	395.609	323.362	379.994	452.508	341.802	471.71	392.117	532.106	323.527	280.092	290.42	294.985
AADACL2	122.471	122.689	125.825	120.213	118.903	124.963	119.006	119.896	124.514	121.826	123.815	120.914	127.621	125.477	122.843	116.518	118.172	123.417	111.51	132.358	115.676	124.678	116.698	123.102	122.537	128.476	124.068	120.767	124.932	117.539	121.078	120.738	115.59	125.085	135.231	115.639	122.118	116.493	119.149	121.941	115.832	121.239	113.918	114.71	128.877	117.635	118.818	114.237	115.818
AADACL3	115.836	118.065	120.96	110.155	120.309	117.953	112.128	108.187	118.153	117.385	118.923	120.375	118.569	121.323	124.219	113.156	115.328	119.643	116.613	111.95	121.841	122.873	122.508	123.898	120.007	119.552	121.115	118.104	126.417	124.65	122.843	127.989	125.883	115.318	110.356	120.378	122.996	122.506	118.809	124.031	118.507	133.863	119.12	116.358	117.607	114.843	116.302	119.822	118.934
AADACL4	120.958	135.802	133.955	114.308	131.999	131.63	125.998	137.898	121.332	122.924	118.969	124.954	123.058	118.831	123.423	121.945	122.808	137.961	122.611	127.135	124.401	124.228	116.908	119.911	114.928	125.151	121.664	125.009	133.556	120.551	132.079	120.226	132.1	128.981	118.593	128.904	122.752	114.74	114.51	114.477	123.892	121.22	120.995	137.594	121.458	125.327	116.228	109.839	146.22
AADAT	116.304	115.455	118.802	124.543	119.31	118.067	119.321	122.542	118.934	119.018	126.331	119.276	120.713	116.797	119.377	119.755	121.039	118.199	116.602	116.383	117.169	117.122	124.194	120.26	119.517	117.24	120.12	116.286	119.558	118.007	117.385	116.489	122.579	120.136	114.473	114.508	114.145	120.209	116.697	115.826	116.346	117.864	119.838	120.388	127.791	117.474	118.776	119.457	121.683
AAGAB	395.254	453.893	399.272	356.909	305.004	277.387	306.796	432.116	444.514	537.794	282.726	476.222	378.83	314.88	327.897	426.995	350.151	282.076	321.324	361.532	385.493	431.567	365.544	419.639	452.415	323.538	405.139	382.529	304.561	383.134	328.865	384.359	361.996	271.621	308.92	303.026	488.755	459.559	375.841	430.807	497.397	220.834	301.539	281.326	979.275	402.295	364.258	379.364	230.672
AAK1	142.231	121.05	128.709	126.797	137.222	133.202	133.611	125.238	133.223	138.084	121.835	126.981	128.644	128.95	137.062	123.132	129.273	127.035	124.596	129.698	127.166	132.388	120.11	127.156	126.404	133.121	127.288	127.722	131.304	138.141	125.653	119.137	129.305	141.37	132.342	127.314	129.847	132.72	130.457	125.566	133.887	125.617	120.183	123.522	143.447	118.872	140.743	120.877	124.154
AAMP	298.716	350.677	355.081	295.279	312.816	405.196	317.675	354.18	171.18	209.442	287.189	355.67	274.885	255.678	303.781	231.235	205.234	173.564	176.342	403.513	244.61	334.835	272.178	243.015	280.313	415.987	347.383	186.634	202.841	317.773	259.51	354.892	257.178	224.914	205.034	346.319	178.965	239.145	184.186	225.415	330.54	460.232	420.353	157.8	127.916	314.925	232.947	319.166	199.248
AANAT	112.746	113.164	112.814	109.67	113.319	114.26	109.392	114.675	117.201	112.385	113.106	114.04	109.327	114.227	113.209	112.791	116.964	114.049	118.271	115.468	114.129	112.148	125.108	114.975	113.734	116.9	110.801	112.599	104.784	107.352	119.643	113.233	118.8	112.258	113.48	112.385	115.215	116.489	109.059	114.442	115.959	111.259	108.169	111.268	111.961	112.241	105.288	121.648	112.558
AARS	1979.64	1975.07	2170.53	2214.64	2029.77	1583.66	1863.35	2251.34	1137.1	1627.75	1552.97	1397.41	1145.23	1430	1301.83	1513.53	1545.67	1594.73	1560.82	1988.43	1462.82	1301.33	1139.1	1214.24	1073.29	1644.44	2056.07	1035.24	1933.49	1429.4	2193.97	1518.14	925.385	1791.06	1412.42	1685.71	1036.06	1113.02	1327.27	854.36	1450.65	1982.2	1487.5	1473.01	2440.49	1470.55	1805.43	1829.15	1983.52
AARS2	391.098	398.847	413.519	365.293	411.83	340.988	371.37	375.135	332.472	352.794	340.988	307.372	285.7	296.605	280.563	317.531	327.542	315.582	275.63	255.55	331.986	268.32	288.5	255.486	273.535	392.832	357.033	254.115	346.808	322.08	329.422	298.442	227.155	314.398	279.256	280.986	215.12	236.686	301.837	212.44	332.849	416.932	332.206	297.792	537.396	307.453	332.572	340.121	278.507
AARSD1	407.519	434.709	437.457	429.606	395.79	451.332	441.578	402.632	423.069	469.519	375.207	358.317	308.569	333.555	311.845	316.109	293.659	370.433	305.581	642.079	481.611	426.182	375.841	336.87	388.411	447.111	422.192	306.627	410.17	331.524	403.581	365.478	373.249	280.986	318.373	385.976	329.014	397.495	369.795	297.595	383.551	455.239	412.301	251.345	201.682	331.774	386.839	438.099	324.692
AASDH	459.651	413.88	460.02	437.559	386.839	328.745	406.292	367.086	533.065	676.02	360.703	426.113	399.713	376.459	414.281	353.443	337.657	356.863	361.399	281.191	341.108	357.249	361.664	375.955	316.911	283.716	309.832	432.44	414.674	345.68	414.206	309.306	323.136	318	472.483	348.675	423.905	388.286	276.455	276.988	311.599	238.973	273.33	418.318	672.565	447.266	342.964	408.615	367.031
AASDHPPT	525.054	444.678	442.296	450.617	500.675	409.924	504.353	449.935	652.901	632.482	443.74	351.892	491.361	494.013	538.64	502.036	609.11	417.422	470.024	211.266	407.283	418.757	386.001	439.022	397.496	356.643	348.15	730.705	691.317	431.372	473.427	335.822	449.287	511.675	789.368	478.324	570.151	475.528	351.791	362.184	297.119	268.085	361.785	487.271	370.399	564.964	413.948	495.125	786.191
AASS	142.383	140.297	147.302	141.41	146.001	139.339	150.159	143.674	132.172	138.94	144.631	134.673	131.497	138.449	130.562	136.697	135.054	157.787	139.938	135.598	130.76	132.405	141.254	134.12	139.553	137.257	140.58	125.593	125.432	139.968	136.971	132.509	139.056	133.401	137.292	127.961	128.704	118.629	137.006	144.493	139.175	135.359	144.388	138.597	121.885	135.531	124.859	122.589	125.535
AATF	552.545	669.333	556.817	582.746	619.995	609.804	553.349	601.96	411.367	459.303	603.528	628.741	544.354	621.097	584.575	536.134	507.283	588.861	642.079	888.521	653.852	615.014	691.266	586.712	532.379	625.833	630.879	453.893	414.281	610.76	752.744	722.874	573.768	554.378	459.026	669.18	503.858	614.747	536.715	502.344	683.34	679.449	639.585	500.947	118.607	506.773	563.243	596.265	446.026
AATK	153.116	142.755	143.263	144.964	141.697	159.066	160.526	150.932	151.564	139.793	143.33	135.75	138.682	134.756	140.936	142.871	143.619	149.936	141.13	132.84	134.078	166.149	141.964	136.959	124.744	160.1	162.642	148.658	142.431	137.9	141.001	143.343	152.749	136.118	137.471	126.557	140.778	139.225	135.375	145.682	169.868	167.384	183.894	152.19	186.281	139.67	137.277	142.899	151.088
ABAT	132.803	123.525	140.001	125.942	137.602	132.031	133.852	126.213	183.256	190.789	164.678	179.127	170.061	158.301	154.935	168.012	168.293	161.614	159.937	132.061	148.957	148.57	155.011	160.371	144.143	127.627	127.469	263.748	177.195	156.042	156.601	149.108	155.21	158.104	174.292	141.881	172.133	152.875	153.532	187.994	125.291	120.56	133.408	188.335	128.768	175.667	180.168	170.318	147.264
ABCA1	360.703	472.686	513.816	367.688	356.549	527.813	466.675	473.833	603.528	619.115	350.384	572.896	656.4	328.912	743.43	693.324	572.896	424.966	409.592	307.988	353.985	720.837	353.673	877.457	720.294	543.904	677.228	1748.86	908.097	485.894	548.612	733.39	393.692	387.464	871.905	465.829	829.696	564.885	357.199	688.392	768.619	280.27	835.628	358.635	1395.83	838.562	1777.27	287.04	1190.32
ABCA10	131.042	129.243	133.661	133.174	124.606	127.17	126.511	121.703	151.351	167.452	141.444	133.603	132.153	143.714	140.003	138.527	142.49	130.292	134.167	126.128	127.042	139.189	130.14	132.977	140.35	131.054	128.233	141.615	131.998	132.241	141.182	125.94	138.696	130.143	141.006	143.431	131.704	141.88	139.413	132.592	126.869	123.493	120.032	134.217	185.662	150.493	127.823	131.562	132.213
ABCA11	135.087	157.435	130.996	132.823	141.823	134.221	134.558	139.616	153.589	169.1	145.393	139.137	142.12	148.149	142.867	147.784	140.11	135.917	147.352	127.109	138.228	134.191	129.269	129.416	124.813	135.337	130.99	141.279	147.842	127.538	130.268	130.762	141.46	140.044	156.633	141.637	143.742	130.698	139.812	140.812	123.818	128.593	123.156	145.737	130.929	146.358	143.267	144.324	125.41
ABCA12	112.902	110.021	110.526	112.521	114.924	114.285	113.794	114.64	113.141	114.931	110.976	115.247	116.837	109.024	114.002	112.313	115.888	110.816	117.94	113.872	113.662	120.321	115.109	114.995	114.7	114.545	115.376	117.103	119.664	114.374	110.442	112.24	112.268	118.089	114.667	113.689	113.887	114.804	110.88	119.866	110.908	114.103	117.231	121.87	122.736	113.66	117.267	121.851	109.548
ABCA13	113.459	119.246	133.548	116.498	110.659	106.093	104.006	120.353	122.027	111.305	135.192	719.716	111.838	161.708	108.383	106.341	117.599	114.243	183.451	112.116	113.095	115.493	130.72	117.017	112.959	219.519	110.129	564.233	152.742	395.254	429.943	111.243	153.681	125.518	146.263	143.532	125.408	139.214	180.726	322.08	576.136	152.974	130.858	583.167	523.236	115.234	196.714	151.693	133.619
ABCA2	168.993	164.989	154.105	151.559	142.785	146.558	173.093	151.849	156.573	143.288	207.661	173.508	185.748	192.377	222.484	172.939	189.132	196.758	181.918	174.077	194.659	208.57	182.545	204.996	170.139	144.553	155.709	173.844	165.221	200.658	176.088	160.641	141.918	160.251	170.135	174.401	153.641	169.355	167.094	182.094	127.546	145.44	138.522	152.187	123.522	167.604	166.6	146.016	131.333
ABCA3	191.857	204.113	178.88	174.806	168.821	158.81	193.505	173.739	158.712	164.612	151.924	175.518	157.552	154.167	156.333	158.928	146.585	151.497	155.544	162.355	151.459	160.845	168.588	155.055	148.575	139.411	146.898	137.936	133.491	136.788	145.15	131.647	137.625	141.044	137.067	142.382	142.988	136.286	137.455	133.903	131.668	170.878	186.784	139.845	230.486	149.136	144.62	142.188	138.458
ABCA4	128.655	118.878	121.186	115.325	118.276	111.202	115.891	118.362	117.845	129.908	120.778	122.012	111.625	123.374	115.711	132.909	121.31	119.485	117.442	123.277	122.191	116.29	113.213	119.081	124.637	116.408	115.373	131.196	117.498	129.134	123.818	123.934	128.926	119.57	123.178	117.142	114.269	124.12	116.72	120.225	121.842	121.501	121.574	121.111	131.397	121.455	119.083	126.892	113.104
ABCA5	142.147	138.205	146.228	145.941	141.564	129.341	145.559	128.679	138.473	132.927	150.965	146.12	147.752	143.244	140.68	150.925	150.055	146.022	141.201	128.201	138.504	134.586	139.203	136.735	131.299	123.479	122.169	136.028	132.006	138.78	138.241	131.094	140.781	140.689	158.466	134.527	131.918	126.433	131.29	145.121	123.908	123.69	119.229	149.171	108.568	147.669	133.491	133.494	132.992
ABCA6	133.455	123.702	125.829	132.912	121.525	134.607	131.102	124.018	129.505	133.98	123.654	126.814	128.075	128.641	128.082	130.73	134.366	126.729	130.119	127.856	124.826	125.285	125.921	127.033	129.451	134.331	123.27	129.493	128.66	121.431	122.053	123.862	136.002	125.817	133.01	127.89	127.815	126.548	121.695	122.933	123.66	125.504	131.453	129.884	146.964	124.935	123.221	123.914	122.891
ABCA7	121.659	119.858	118.757	120.007	122.297	117.873	122.731	117.843	135.682	114.666	123.388	126.958	125.078	119.714	120.215	120.621	119.236	122.582	119.996	118.758	117.437	126.802	118.262	120.858	135.748	125.039	126.946	124.536	123.359	126.52	120.026	124.403	118.63	127.53	126.065	120.881	121.505	119.282	118.86	121.625	123.369	117.095	120.834	118.075	118.006	119.169	125.405	118.242	119.273
ABCA8	118.891	125.896	123.333	124.769	119.418	120.102	123.884	123.765	124.753	121.497	123.129	120.657	120.164	128.29	130.451	121.712	116.915	126.625	122.278	118.681	123.589	120.899	124.786	127.879	138.595	123.709	124.891	121.722	119.583	122.195	118.649	129.402	120.121	124.733	116.788	122.425	119.963	117.969	119.745	124.341	123.3	133.912	124.447	121.27	124.236	118.674	123.879	124.557	117.098
ABCA9	134.16	138.961	134.866	134.737	130.479	132.313	131.049	130.502	131.431	128.425	139.364	130.261	137.782	128.891	124.806	132.425	130.366	133.879	128.717	129.698	133.821	127.314	136.566	121.767	134.217	129.09	136.369	123.493	123.8	126.758	128.23	121.22	128.694	135.351	134.354	131.132	129.817	119.75	126.166	122.9	132.506	137.678	132.68	129.186	132.925	126.036	132.863	129.044	132.737
ABCB1	441.639	509.153	278.943	318.137	363.305	280.806	426.822	284.165	620.626	551.723	335.631	216.409	283.444	360.233	347.881	416.738	434.299	321.194	388.081	312.688	320.333	362.144	340.934	245.913	356.193	203.188	233.731	198.712	290.048	179.09	188.713	181.871	168.613	195.724	252.34	195.476	309.542	247.098	217.432	262.155	141.737	191.654	140.626	178.766	348.613	240.605	154.803	178.002	210.575
ABCB10	655.895	420.503	552.911	453.793	446.582	369.738	439.808	430.004	731.509	773.309	573.008	506.409	547.414	521.581	488.755	484.468	574.615	382.529	569.246	272.992	320.025	519.684	505.012	515.342	518.258	385.55	396.158	720.294	646.981	543.904	510.389	397.495	515.243	763.212	736.737	480.971	810.223	737.922	380.822	652.623	686.217	344.531	372.858	599.989	991.465	509.585	445.055	369.626	792.11
ABCB11	117.093	134.6	129.737	126.879	133.378	122.267	126.385	128.625	118.543	129.31	125.147	113.817	132.215	127.282	123.604	115.242	123.408	121.844	123.414	120.265	120.329	112.804	121.588	118.333	107.783	121.76	122.845	115.835	121.465	118.27	130.134	121.461	123.406	122.529	121.406	115.3	117.538	123.794	118.433	116.578	122.785	128.53	126.126	122.944	115.001	119.302	125.737	124.786	121.256
ABCB4	165.84	156.261	141.467	157.246	137.631	134.633	136.18	126.582	219.903	182.887	153.137	137.28	121.308	160.784	165.601	129.626	128.606	155.316	178.644	135.696	142.106	144.721	140.145	117.26	165.702	171.554	143.501	156.71	128.152	144.913	169.787	180.043	179.035	117.365	145.661	154.541	140.401	173.739	147.962	193.574	126.648	121.951	123.401	151.41	114.264	157.924	156.221	163.32	133.826
ABCB5	111.014	110.069	110.986	109.29	112.787	105.025	107.352	111.836	111.459	118.562	106.921	121.06	118.637	113.93	114.62	112.289	114.658	110.881	115.68	115.941	113.106	110.412	114.773	110.562	113.545	105.443	112.556	116.274	116.375	115.662	109.515	113.308	118.232	112.484	108.365	113.784	116.203	115.622	108.07	104.892	111.199	108.568	105.736	107.721	121.153	110.096	109.91	114.208	124.389
ABCB6	159.593	194.543	176.67	168.422	168.834	154.563	178.866	178.163	213.486	267.597	196.061	196.28	171.773	173.641	171.281	170.049	182.456	159.937	162.426	194.623	165.92	169.371	150.874	152.403	147.764	146.892	179.477	219.14	236.918	172.415	215.62	180.511	215.141	187.725	203.209	179.833	164.82	186.896	175.678	165.891	297.595	235.556	212.457	202.386	640.165	187.607	190.462	176.089	151.661
ABCB7	704.367	669.89	657.574	549.276	534.146	502.974	591.793	512.022	637.137	809.562	382.039	393.219	410.696	407.604	350.197	523.859	450.82	405.902	535.153	368.58	381.721	454.897	438.531	392.264	445.168	647.249	498.811	482.556	372.399	456.505	519.235	405.139	385.976	482.823	558.356	370.893	565.107	526.748	408.205	431.8	485.797	426.511	444.957	390.452	1066.34	468.229	419.639	460.13	431.886
ABCB8	138.337	159.335	160.397	134.118	134.369	135.383	135.802	126.527	129.869	119.598	141.198	166.507	140.857	131.705	136.769	131.426	145.592	135.886	137.033	146.08	143.132	137.194	139.528	129.09	131.437	135.587	150.224	124.975	120.144	139.998	163.3	158.359	135.743	135.819	135.998	141.62	142.352	133.146	137.619	129.355	125.605	146.316	127.485	146.29	142.695	139.912	138.02	142.875	124.621
ABCB9	150.626	167.277	181.697	154.341	156.841	165.303	174.539	395.989	186.634	217.104	204.202	219.162	193.283	167.656	151.04	172.762	165.879	179.258	152.123	577.096	177.696	190.176	176.449	163.765	182.495	194.688	300.748	172.265	492.216	155.283	325.847	241.174	175.972	282.212	174.966	342.964	222.311	214.593	174.691	190.411	148.415	289.071	192.411	190.532	705.124	242.66	315.33	177.994	386.486
ABCC1	142.972	150.402	152.893	154.396	153.505	145.137	159.085	169.9	123.35	124.868	165.702	157.795	154.42	149.664	166.271	146.985	149.095	164.359	159.124	195.787	145.796	154.397	166.204	172.741	154.553	149.898	163.466	152.074	139.412	160.448	140.235	160.333	156.498	159.238	179.717	162.956	138.722	158.21	152.344	148.018	141.084	149.737	164.284	165.868	123.541	157.833	146.325	136.317	132.798
ABCC10	194.505	191.767	188.794	202.728	179.077	197.979	197.704	214.792	231.288	238.857	215.53	230.696	218.484	222.219	210.811	193.621	184.288	212.44	190.252	247.822	225.469	218.506	200.158	189.852	182.977	202.665	239.571	216.456	215.731	222.959	178.644	234.697	165.346	197.501	193.071	214.357	171.423	205.709	199.52	179.553	232.362	247.602	236.918	175.834	174.179	228.773	225.415	224.993	161.78
ABCC11	122.475	122.597	122.24	115.879	131.69	120.758	123.52	124.582	127.525	122.311	124.17	119.539	121.962	119.352	128.254	122.305	129.472	127.229	121.909	118.253	120.442	122.148	127.081	118.899	124.044	116.903	113.479	128.022	123.436	117.457	123.898	118.875	118.705	129.307	120.801	123.491	128.45	119.082	122.788	119.591	118.944	123.968	121.597	121.404	127.295	123.946	123.123	128.446	118.59
ABCC12	122.904	125.393	114.663	116.469	118.254	111.775	112.918	121.746	114.064	109.088	110.702	121.557	119.64	117.547	108.69	117.539	111.014	115.539	120.23	121.516	111.717	116.446	114.441	114.998	119.08	123.348	118.14	126.763	116.023	121.157	121.466	118.58	118.003	117.229	121.166	123.791	114.471	112.215	111.082	115.154	116.687	123.52	117.096	118.231	126.116	122.767	113.983	121.499	110.842
ABCC13	127.921	123.951	133.249	131.918	127.244	131.959	124.921	122.617	120.803	126.675	126.415	127.034	118.161	123.044	127.492	122.04	122.044	125.423	126.723	125.922	125.196	127.289	122.59	120.498	122.59	134.993	135.19	124.889	124.903	129.091	125.177	123.359	123.643	131.383	121.364	126.478	133.832	141.934	125.325	123.391	206.404	127.891	134.296	123.493	129.686	131.382	131.282	124.576	120.452
ABCC2	131.015	133.422	132.494	133.372	127.309	123.141	129.39	120.054	166.183	148.855	132.576	149.471	137.019	138.732	130.994	132.013	127.273	133.863	139.124	140.368	119.536	143.064	128.787	139.072	135.58	131.863	132.517	145.83	148.935	139.644	148.791	133.017	141.875	144.558	137.995	142.18	138.548	123.446	138.033	138.107	138.444	131.076	123.738	155.624	219.119	136.763	150.342	134.485	121.913
ABCC3	348.728	552.713	540.461	655.052	415.338	246.302	397.23	262.447	614.053	912.963	591.24	597.182	335.772	506.455	564.078	277.356	405.238	556.693	875.616	362.803	470.378	430.72	448.804	434.592	282.217	413.336	408.377	357.809	291.198	358.983	303.92	225.656	827.589	215.709	415.889	275.404	397.858	650.949	607.979	806.393	339.622	642.6	572.596	406.002	396.803	307.322	336.624	466.017	217.197
ABCC4	335.209	324.352	437.039	339.813	272.821	205.075	267.847	286.193	532.053	647.774	291.999	330.239	325.553	363.809	313.191	268.009	237.999	345.746	436.67	245.826	252.819	257.745	366.717	408.85	295.196	234.753	262.513	306.023	386.727	357.038	251.989	200.911	494.901	301.43	397.89	320.694	666.561	618.338	402.37	641.132	289.59	257.534	262.709	684.861	463.9	256.35	347.015	337.357	272.289
ABCC5	373.036	404.463	365.851	369.169	381.279	318.565	367.436	270.212	411.747	521.581	354.837	412.206	369.51	295.614	344.758	438.846	364.316	310.17	417.902	256.646	329.066	314.971	305.73	309.366	311.34	308.473	305.832	384.503	264.21	315.426	329.359	290.624	313.816	358.816	312.702	333.606	322.499	364.048	397.017	369.51	343.285	259.732	294.811	254.285	516.153	343.642	368.646	322.161	328.363
ABCC6	124.309	119.958	128.318	125.639	122.359	125.866	124.412	122.607	124.945	121.008	123.235	126.282	127.607	121.381	125.132	129.153	125.473	121.697	124.11	125.105	121.911	131.795	126.073	125.76	124.271	126.816	126.82	126.298	126.124	129.889	129.463	129.496	126.978	125.307	132.038	128.867	127.219	125.397	120.518	127.782	123.879	128.526	125.611	128.614	123.814	123.181	129.689	129.136	131.122
ABCC6P1	129.359	141.034	126.849	137.368	127.975	130.87	125.796	134.889	123.241	114.393	126.065	133.977	129.496	127.621	123.934	122.546	123.526	127.325	122.785	127.09	131.223	129.457	136.959	131.192	122.463	130.851	130.836	125.171	129.966	125.87	123.6	116.763	129.406	120.774	125.776	127.697	119.479	121.294	116.41	133.989	134.092	133.582	127.039	138.444	120.326	121.276	121.874	124.01	113.262
ABCC6P2	149.823	150.764	157.84	157.003	153.924	186.153	152.223	148.801	136.494	141.888	131.827	141.451	153.296	146.407	134.436	146.755	139.394	142.716	138.957	134.876	134.807	141.967	146.397	129.8	143.769	182.598	180.092	138.873	143.028	146.136	135.03	163.928	143.067	147.551	146.6	140.396	139.969	153.711	148.039	146.929	163.802	151.484	209.162	139.206	150.578	141.978	148.033	140.766	130.082
ABCC8	116.697	111.133	107.515	112.497	116.7	113.684	113.037	111.707	121.988	108.557	115.788	114.213	114.5	113.615	113.898	112.116	112.716	116.916	113.224	110.309	106.111	111.735	114.319	111.984	110.784	117.044	109.458	115.527	108.674	112.026	115.395	109.678	109.96	115.727	108.106	122.255	110.53	106.264	120.757	120.553	113.532	112.279	107.581	113.46	116.589	115.185	107.255	114.896	106.921
ABCC9	142.875	138.433	142.498	138.32	123.342	127.466	145.369	136.76	117.045	125.608	125.399	120.102	123.441	122.697	123.013	132.824	129.673	124.239	134.037	126.642	139.744	122.234	124.215	126.843	135.475	130.536	136.856	122.595	127.338	133.998	123.802	132.975	128.568	135.257	133.173	120.332	125.291	125.935	121.886	128.606	150.65	142.566	135.525	127.279	122.847	126.88	123.475	126.181	144.611
ABCD1	144.303	152.096	150.536	152.109	133.481	142.166	141.245	143.759	134.636	127.724	184.392	239.168	186.214	169.993	204.953	171.531	162.447	207.73	174.381	186.954	180.526	198.982	173.975	174.754	173.509	172.265	183.328	250.464	195.198	201.235	221.082	240.846	189.372	152.448	165.902	176.561	179.662	242.069	187.067	190.663	249.457	227.481	239.448	194.134	111.222	209.725	191.025	186.313	141.673
ABCD2	123.533	130.529	117.346	121.392	124.947	116.65	117.855	127.891	124.306	132.123	123.812	129.529	126.937	122.153	121.297	129.89	126.278	119.386	125.667	128.959	123.636	119.361	126.338	116.843	135.224	114.763	117.402	127.172	134.077	126.721	126.79	121.876	125.976	132.259	139.69	120.669	131.113	131.082	122.019	123.337	114.014	116.207	113.17	133.76	130.307	122.789	127.457	125.448	122.861
ABCD3	258.854	290.337	251.433	286.142	250.143	218.688	286.572	290.424	328.543	289.412	220.86	256.678	256.751	229.521	230.645	237.742	265.688	257.146	259.226	196.782	210.064	225.033	262.68	235.145	199.151	224.126	210.263	270.522	291.224	251.717	272.131	187.003	224.192	277.038	302.037	204.303	274.699	237.478	206.256	216.578	247.689	207.365	208.559	251.677	150.664	254.115	224.329	230.349	186.765
ABCD4	130.116	129.821	127.71	125.46	128.157	123.598	130.229	131.498	137.448	124.393	135.192	126.664	133.714	142.683	128.84	136.916	130.388	133.472	132.631	133.704	121.876	130.861	131.327	128.272	130.228	134.313	125.69	127.558	129.794	133.531	138.524	129.021	132.961	124.293	134.463	136.755	125.983	126.022	124.7	132.214	122.536	129.703	128.938	130.081	125.364	134.491	127.651	129.782	122.842
ABCE1	615.395	655.085	482.28	590.109	527.673	397.146	530.294	483.058	1057.43	1073.76	637.73	579.536	599.984	647.325	644.023	630.527	601.973	471.581	670.601	593.014	537.152	684.638	652.522	562.255	675.908	358.066	359.317	681.769	820.979	493.078	703.053	562.175	619.744	734.799	893.209	708.367	756.104	723.625	560.01	561.486	341.169	303.78	234.079	618.079	627.764	753.936	437.783	496.375	727.629
ABCF1	1302.78	1542.7	1519.79	1424.01	1349.35	1240.36	1351.13	1328.4	990.146	1534.55	1013.85	905.281	834.501	981.539	981.183	953.278	1014.67	1283.72	1122.29	1073.88	896.116	970.813	861.253	904.507	827.195	1252.3	1239.48	755.191	1346.96	1029.94	1225.04	1044.88	754.594	881.625	742.309	953.642	728.233	803.005	883.851	707.853	1255.34	1268.88	1012.34	954.039	933.676	960.136	1037.31	1105.75	891.183
ABCF2	185.249	205.834	183.547	176.929	170.118	151.165	167.863	158.041	187.894	183.829	165.393	186.913	171.134	170.701	166.405	159.328	166.847	164.312	163.714	180.043	179.833	220.369	179.049	163.3	173.613	175.773	173.753	163.645	182.143	180.862	197.852	181.224	162.472	160.708	177.743	177.82	196.238	207.427	180.814	163.413	177.726	185.9	167.384	171.788	123.548	184.661	146.768	177.195	136.903
ABCF3	176.383	211.29	196.782	198.571	168.526	192.635	177.372	204.812	168.526	162.807	200.999	184.093	190.09	197.723	199.228	178.592	192.202	205.709	171.159	227.402	199.577	196.146	213.657	174.741	160.295	173.338	208.359	217.564	206.272	186.281	225.607	206.368	170.652	150.991	173.817	180.425	155.161	188.08	168.065	172.749	205.815	235.659	225.631	166.87	107.953	227.315	202.411	212.955	142.421
ABCG1	144.306	150.72	147.539	161.333	145.582	157.181	157.939	165.961	136.961	153.782	153.235	147.619	162.236	145.662	166.754	161.744	177.479	159.906	137.093	155.418	154.882	155.87	148.189	151.475	152.704	151.159	151.961	160.973	175.62	156.17	159.541	156.295	138.829	145.213	145.44	155.464	156.27	157.338	160.018	159.35	152.985	147.172	146.849	142.205	136.728	152.52	181.034	148.091	185.65
ABCG2	103.218	111.984	108.298	113.395	110.921	120.615	115.797	111.972	122.645	115.234	110.096	108.15	113.267	113.715	110.77	111.893	117.081	115.836	111.543	123.449	114.55	118.124	128.529	115.337	114.202	107.751	110.329	117.518	117.251	118.915	122.724	108.606	116.659	116.866	113.305	123.161	120.599	116.476	107.337	119.34	115.53	115.779	110.754	114.055	126.164	116.22	110.231	113.565	110.912
ABCG4	133.383	150.887	139.008	137.875	126.439	133.248	130.394	143.27	138.138	136.878	147.607	144.763	143.229	130.53	141.708	133.026	148.507	134.784	135.178	137.147	154.466	146.667	137.436	134.814	134.549	158.065	142.759	132.809	138.117	129.304	138.425	174.829	126.316	144.194	139.533	141.644	128.76	134.444	137.349	143.66	145.641	148.945	136.614	127.396	137.574	130.537	133.906	129.652	124.77
ABCG5	124.785	127.985	125.747	126.284	121.336	132.5	127.617	128.364	119.371	135.648	128.172	123.178	121.094	124.153	131.42	119.757	124.76	114.999	126.394	131.427	126.788	133.192	119.874	130.923	122.783	128.548	131.585	127.316	125.869	138.128	122.126	124.797	127.044	120.522	119.708	121.039	125.184	128.662	126.303	126.757	129.312	121.952	124.464	122.566	121.251	124.052	116.373	131.096	113.583
ABCG8	115.775	131.639	124.528	123.45	117.717	116.941	120.024	120.087	126.219	118.626	119.533	117.292	110.851	126.472	128.408	120.321	116.245	118.895	124.681	133.13	117.288	121.251	117.998	116.207	111.579	122.205	126.726	120.507	116.706	124.744	125.342	125.457	123.092	117.556	120.183	132.576	115.081	120.902	122.408	120.313	122.545	128.345	121.343	118.64	111.446	121.056	117.249	124.62	114.484
ABHD1	150.411	144.585	147.347	138.19	153.631	145.388	152.545	140.93	142.147	147.648	139.008	141.694	134.353	132.122	140.014	144.194	137.42	143.619	131.371	142.116	134.379	145.297	137.422	134.538	142.252	147.085	151.847	133.797	126.513	141.881	143.917	128.107	131.95	134.66	137.614	128.36	126.092	116.366	137.379	137.402	140.243	140.787	127.181	125.661	155.423	137.03	130.293	155.676	131.205
ABHD10	466.216	462.279	449.74	468.053	389.494	379.364	450.249	465.032	505.574	655.895	374.807	341.811	374.37	370.961	429.215	399.775	364.908	447.96	393.832	362.875	286.44	336.564	373.441	344.287	314.24	359.473	342.106	371.37	492.795	339.174	496.411	382.593	297.892	354.32	404.391	307.498	356.496	363.425	275.472	270.14	380.194	347.474	317.898	338.149	595.255	467.4	415.632	475.493	459.739
ABHD11	136.25	128.636	139.616	132.478	149.712	146.097	137.356	155.536	120.32	110.653	138.62	145.356	155.851	136.805	140.831	144.043	145.133	154.362	140.05	150.584	148.833	137.819	142.793	141.64	136.602	167.19	164.506	131.864	128.583	145.852	136.049	171.645	156.36	158.889	147.352	145.374	147.784	131.895	144.695	134.724	132.176	177.324	155.989	152.729	114.407	135.331	143.303	130.231	130.658
ABHD12	199.693	214.293	200.034	210.646	219.275	200.452	214.468	235.726	222.427	218.117	200.014	212.021	203.922	193.647	196.491	173.233	183.314	188.892	190.09	269.538	232.155	236.433	272.016	240.649	216.409	235.814	235.356	189.179	205.155	213.289	241.733	245.458	190.011	221.205	207.89	216.306	211.6	259.51	223.45	211.865	192.167	233.521	245.233	187.545	131.152	191.89	179.674	195.942	177.312
ABHD12B	127.105	128.973	135.211	125.962	120.931	127.476	131.152	122.93	120.592	115.512	123.107	126.869	132.426	126.194	123.814	127.597	118.878	125.896	130.53	124.18	123.873	127.975	123.58	124.297	130.245	128.352	123.64	121.311	123.332	123.6	127.619	125.185	126.036	130.779	134.672	126.475	132.419	116.975	136.959	125.021	137.826	126.96	136.074	133.504	118.213	130.348	123.682	123.001	124.32
ABHD13	133.118	129.181	127.796	131.55	122.703	127.332	124.606	134.387	143.052	147.317	125.881	124.149	126.474	133.951	127.039	138.03	139.505	126.963	137.66	124.609	126.927	133.861	134.533	140.192	135.699	127.793	127.715	150.192	127.585	126.447	132.337	131.315	139.55	136.396	142.786	138.094	135.382	138.081	132.642	136.138	123.495	133.282	135.04	137.518	203.605	128.989	126.817	139.331	125.788
ABHD14A	361.829	429.606	377.982	330.731	391.819	394.522	375.402	492.901	277.884	300.748	408.531	375.071	320.273	390.364	369.991	297.551	315.532	334.788	285.866	484.999	533.293	425.134	445.758	391.468	351.356	395.548	498.496	245.716	282.045	339.589	397.27	395.018	246.123	283.935	248.625	365.907	330.389	478.386	625.498	308.869	372.517	626.723	411.747	253.555	156.773	403.957	359.901	421.297	218.255
ABHD14B	240.846	321.479	241.477	254.018	241.981	263.493	250.202	250.238	461.551	591.793	236.944	270.368	230.459	222.979	270.757	233.493	210.459	325.293	253.463	399.565	371.638	335.459	287.469	246.981	295.666	291.776	307.688	232.301	310.49	243.967	255.746	258.929	195.237	220.984	188.827	249.627	244.74	328.002	366.442	245.29	302.619	385.181	290.943	210.851	124.591	255.877	193.679	292.297	150.042
ABHD15	433.538	340.239	267.23	321.424	358.507	303.781	361.664	338.105	472.483	371.568	499.511	408.293	438.777	444.514	451.825	472.144	532.379	428.535	442.317	504.277	511.893	480.119	516.801	502.344	543.552	258.351	312.642	332.149	434.456	321.584	352.563	334.835	318.152	400.537	391.025	461.551	439.472	373.663	407.363	399.485	211.24	382.39	353.189	380.622	743.626	403.439	265.91	365.166	429.606
ABHD2	155.69	158.527	180.412	181.769	158.637	202.161	167.057	170.865	160.544	162.888	166.553	166.836	168.047	147.926	157.137	146.22	161.508	163.863	158.775	174.67	169.298	165.259	170.332	176.182	154.29	199.441	192.677	181.935	169.754	164.792	151.504	164.186	148.437	159.369	156.102	174.716	170.505	170.834	149.431	162.405	224.847	202.116	233.521	157.484	253.333	172.224	208.278	159.195	162.78
ABHD3	604.865	547.753	643.532	683.66	628.146	644.091	604.865	721.966	734.139	564.643	576.965	568.278	879.948	775.048	781.76	841.804	840.381	627.701	624.348	535.79	575.755	486.815	612.855	634.445	592.413	517.492	466.787	863.299	999.383	630.879	414.882	451.925	614.747	676.697	886.052	654.001	707.307	370.318	437.389	674.082	383.134	331.671	455.585	727.573	145.732	553.349	809.562	547.527	929.313
ABHD4	149.159	163.31	160.024	164.103	156.11	163.782	165.383	159.101	157.387	169.358	172.788	160.268	182.572	171.423	167.511	147.395	143.698	170.992	176.216	178.977	177.029	164.516	182.043	174.528	162.92	148.624	161.941	161.836	165.482	171.399	155.579	172.195	159.696	142.098	148.409	178.231	155.131	182.203	189.057	187.957	191.585	225.688	224.784	167.633	132.049	189.937	162.097	158.38	131.989
ABHD5	246.328	182.652	269.173	292.733	250.496	273.901	173.124	268.987	326.143	250.27	368.236	425.206	547.62	337.278	335.295	293.758	282.117	282.797	366.247	260.903	317.087	395.254	330.849	338.873	323.483	265.13	252.544	807.992	309.678	338.315	324.358	261.927	342.445	277.785	335.93	269.284	467.233	498.496	311.642	562.452	465.032	248.299	471.21	431.664	777.713	286.53	385.55	264.934	329.933
ABHD6	288.043	303.781	303.305	310.788	318	362.995	348.982	340.702	365.478	374.243	292.51	257.441	297.075	291.14	318.152	285.78	282.959	313.554	308.21	238.912	259.804	262.102	259.582	285.189	243.431	327.088	317.374	316.064	355.002	263.577	251.677	269.212	256.054	214.543	218.227	244.865	206.015	216.874	189.548	220.705	260.944	290.673	435.832	231.942	323.538	301.953	215.933	296.898	269.804
ABHD7	194.987	187.517	154.152	184.766	159.772	230.672	250.073	223.551	217.833	207.157	154.884	143.015	149.722	203.685	187.88	177.756	224.891	195.006	162.062	158.229	173.373	157.042	168.843	195.731	164.612	168.612	143.24	150.776	151.827	143.335	139.736	149.69	122.748	165.502	149.729	156.773	158.397	173.191	145.764	137.75	131.824	146.702	132.94	137.246	124.779	139.423	141.856	127.85	147.619
ABHD8	489.503	465.644	527.902	445.403	393.832	465.464	430.97	478.165	203.817	209.651	354.579	374.493	446.175	337.879	355.533	356.965	365.907	406.924	418.02	319.268	379.07	388.348	416.142	348.061	331.472	694.2	596.265	312.2	226.042	531.196	477.934	494.454	379.434	421.966	359.007	403.008	489.827	521.704	355.478	389	652.175	655.895	944.231	340.292	312.702	354.255	455.923	463.295	365.293
ABHD9	127.945	125.882	130.29	125.219	127.853	127.778	125.664	135.42	133.734	120.157	123.168	137.707	132.204	128.918	131.463	130.202	129.071	123.33	126.742	125.661	126.588	121.222	132.593	129.639	120.091	132.36	133.219	119.479	119.695	133.757	130.622	130.208	135.42	127.502	124.72	135.3	132.876	130.583	133.629	124.772	131.902	157.715	198.882	125.998	209.281	119.865	137.964	134.676	126.161
ABI1	757.978	593.048	555.147	584.588	569.134	401.222	536.798	496.041	694.29	722.602	576.602	441.058	563.03	629.967	665.423	646.286	623.681	629.742	692.415	400.779	450.795	529.738	579.527	629.936	614.676	426.508	446.388	685.043	600.127	426.371	458.045	497.622	547.339	614.48	694.211	594.712	633.244	475.148	472.456	547.042	447.456	381.998	407.902	539.635	555.211	534.867	523.896	462.266	731.38
ABI2	138.883	133.814	135.174	140.046	141.407	128.756	146.986	135.625	134.702	134.991	139.465	133.969	139.576	138.556	142.957	136.658	140.995	133.74	147.022	155.398	139.769	124.169	137.235	134.461	134.273	135.53	132.925	134.161	126.633	132.915	139.24	128.494	151.915	137.208	145.815	135.357	135.748	138.895	139.861	136.462	135.261	127.75	134.019	140.3	135.905	127.738	123.154	137.136	130.695
ABI3	626.278	615.014	436.431	563.913	810.223	663.103	595.255	630.123	678.067	531.394	770.263	559.206	553.234	754.934	782.636	793.289	898.668	937.197	554.99	484.179	640.775	533.666	576.136	650.615	473.918	490.504	608.617	500.365	706.608	650.124	480.971	775.58	376.164	478.647	482.134	560.728	607.923	687.924	352.03	346.627	320.904	577.513	681.274	300.053	1006.54	545.854	471.67	379.875	784.984
ABI3BP	123.06	118.755	123.19	133.381	121.492	125.631	121.757	124.808	114.692	115.259	129.645	117.151	120.249	120.498	127.867	116.593	114.727	120.079	120.618	125.344	116.944	113.157	122.231	122.672	132.337	131.296	120.734	116.086	123.056	121.18	118.1	124.183	118.977	124.329	117.39	114.182	118.331	120.433	126.262	115.313	129.183	120.807	119.179	120.666	133.445	117.843	123.07	125.842	122.928
ABL1	174.292	163.203	160.608	164.198	192.411	179.019	158.527	192.153	214.44	190.842	184.468	205.38	183.626	164.899	169.348	170.505	160.506	156.923	140.329	282.764	230.596	245.492	232.532	151.49	191.399	276.166	233.053	160.268	144.147	211.027	191.735	278.271	320.225	230.486	178.132	248.081	293.659	324.583	175.217	279.68	187.447	210.575	213.12	171.908	123.374	178.755	182.992	158.03	129.233
ABL2	125.841	120.731	124.404	121.032	126.632	124.49	125.951	125.107	121.916	117.648	124.963	119.743	127.512	123.876	124.72	122.133	126.171	126.216	128.11	131.606	122.463	119.966	124.897	127.748	122.093	124.54	124.062	131.654	126.94	132.277	122.111	134.156	121.915	128.659	124.777	130.607	119.5	127.519	125.126	127.223	125.995	126.493	122.966	123.77	123.503	128.006	128.552	123.743	119.275
ABLIM1	637.394	823.271	859.137	698.012	707.245	593.334	644.118	570.133	220.631	313.09	649.132	334.33	626.259	757.762	669.283	712.135	725.254	461.134	494.476	495.98	674.677	433.502	631.169	587.624	787.373	503.897	438.857	253.302	197.046	371.96	402.638	348.489	397.067	574.805	756.446	662.804	403.809	186.505	536.601	387.561	375.081	528.583	242.691	607.045	128.197	382.273	396.117	490.213	377.36
ABLIM2	143.794	126.57	123.249	135.162	132.459	117.319	124.606	126.278	130.616	144.03	133.787	147.665	120.437	138.202	140.632	133.317	139.475	134.911	136.313	133.732	132.145	132.993	128.377	122.872	127.397	126.472	122.19	127.025	118.409	131.689	142.184	128.464	133.048	133.812	128.674	119.437	128.31	132.579	134.944	124.491	119.755	124.234	119.126	138.531	115.844	129.474	133.058	131.657	125.775
ABLIM3	170.28	208.981	200.315	201.121	232.838	173.078	187.277	141.512	174.869	332.322	200.072	362.437	177.938	180.768	211.947	148.73	161.11	189.904	165.902	146.566	211.733	172.801	208.732	200.656	190.586	172.96	163.548	201.403	170.049	223.654	168.67	137.893	411.286	133.42	182.44	173.043	210.345	367.978	293.849	380.494	213.511	228.481	183.451	241.174	144.611	170.417	171.698	196.782	116.284
ABO	115.283	113.658	108.483	114.065	109.719	107.935	109.585	119.191	116.045	112.562	108.984	119.763	118.856	119.641	116.309	122.54	115.085	116.858	111.573	111.247	113.584	120.106	108.749	114.142	111.486	118.982	112.875	128.886	121.455	113.927	120.892	111.4	117.192	110.955	115.476	117.618	118.519	114.811	113.149	108.54	111.605	111.758	115.611	123.947	117.58	110.231	115.717	115.077	109.411
ABP1	124.24	120.428	118.941	123.316	115.319	126.4	119.274	129.365	125.713	119.09	123.323	127.865	138.305	126.997	114.091	118.912	120.84	123.19	135.039	126.582	127.106	132.471	121.436	118.495	122.865	133.012	139.536	137.805	125.675	119.126	135.386	124.305	126.556	126.08	121.121	158.03	123.73	120.31	124.65	126.053	135.708	121.323	167.817	129.652	201.826	120.635	128.405	127.395	117.82
ABR	149.431	132.221	150.626	161.002	157.849	154.033	149.965	137.36	120.805	120.542	164.209	176.489	187.607	168.588	182.083	171.606	159.99	161.671	149.136	143.177	175.549	138.598	162.355	164.134	150.25	147.511	160.066	127.937	122.383	167.535	134.18	161.267	158.867	157.145	143.626	150.913	134.087	126.195	158.936	159.409	156.695	141.034	162.697	135.816	118.636	146.621	143.359	161.97	129.37
ABRA	115.545	116.157	119.453	113.139	118.399	119.302	116.823	117.528	123.286	121.013	112	115.918	122.872	115.523	120.313	117.639	116.424	115.29	118.55	118.98	112.697	115.694	120.388	121.337	113.609	114.321	114.96	116.83	117.794	119.245	128.232	111.031	109.612	122.207	119.574	114.669	111.166	117.117	119.251	121.464	114.918	113.186	111.98	115.532	115.281	116.687	121.046	117.469	107.174
ABT1	206.076	230.995	206.053	208.299	218.889	205.611	221.312	204.226	227.402	271.005	191.146	185.481	208.448	194.114	205.416	191.215	197.888	199.311	204.625	208.942	216.112	233.933	224.818	223.428	220.834	173.641	207.116	245.745	210.371	187.431	177.359	164.922	232.362	214.614	287.469	220.172	223.574	233.284	253.525	185.813	189.613	174.179	176.142	232.184	131.909	224.648	163.3	187.894	213.383
ABTB1	762.995	878.168	898.623	753.179	722.435	975.7	709.955	646.392	335.217	359.45	783.731	1002.05	1233.56	734.962	678.174	732.706	681.224	693.121	741.638	679.345	913.766	891.776	816.531	715.448	813.698	990.56	833.324	1238.73	368.286	820.344	812.022	689.646	657.832	698.003	689.822	689.651	851.688	1271.08	889.348	1249.06	1073.37	940.578	1158.25	669.145	509.538	738.8	1181.88	769.803	498.275
ABTB2	127.709	120.829	117.671	125.671	127.526	127.855	114.707	121.007	140.766	119.95	133.176	119.998	135.788	118.994	132.049	122.58	124.652	130.556	131.099	135.976	128.003	126.099	123.362	128.012	116.024	123.043	125.305	175.773	174.953	120.24	126.153	123.937	137.388	123.561	121.896	122.26	131.022	121.384	125.524	120.787	171.872	140.793	128.698	132.623	112.139	128.096	127.887	131.124	162.58
ACAA1	645.964	734.903	760.135	838.791	785.153	1034.91	733.39	807.41	560.728	486.721	771.095	855.515	1008.79	884.226	838.562	795.377	691.472	843.71	821.973	1124.31	715.21	670.684	786.981	654.309	606.164	1060.73	918.22	953.32	827.408	864.033	852.426	997.542	935.614	639.182	725.38	825.611	761.901	857.982	665.622	710.129	973.428	901.353	1327.77	718.821	118.846	797.422	1076.17	766.549	777.54
ACAA2	706.143	617.839	584.7	700.061	755.323	550.487	584.827	726.101	752.234	731.685	674.739	674.082	613.145	674.56	632.737	483.72	558.009	779.319	820.64	682.556	807.992	696.072	883.87	735.444	656.2	620.393	686.479	430.326	749.917	657.266	638.927	724.884	614.288	799.581	568.529	664.244	905.633	671.344	702.403	685.575	537.169	682.556	827.408	546.962	1022.56	639.585	444.514	560.384	653.852
ACACA	325.894	334.553	338.205	343.415	303.026	256.125	321.905	237.105	315.375	333.381	313.554	266.575	268.848	285.866	272.799	257.957	275.747	277.884	289.412	200.468	241.029	298.025	256.054	244.928	247.602	251.57	280.953	261.891	319.776	302.071	305.877	276.53	267.271	291.107	288.278	269.571	258.024	256.5	271.327	239.312	265.87	291.441	265.297	281.372	718.985	287.879	250.979	298.117	300.462
ACACB	303.735	338.581	377.039	267.194	277.316	298.2	283.604	286.228	217.604	276.121	267.194	274.923	239.785	200.413	223.701	225.268	206.118	265.946	261.395	175.602	223.126	260.336	215.709	230.779	224.676	243.495	293.849	197.199	208.032	204.936	232.77	189.131	180.484	213.486	184.677	190.324	196.315	183.465	190.735	173.398	204.432	239.23	161.467	175.693	478.386	253.587	215.208	265.79	142.528
ACAD10	321.693	320.111	367.978	268.678	296.644	281.191	309.411	277.849	260.16	248.331	309.258	306.848	293.444	330.998	276.827	265.297	262.712	290.892	295.614	249.725	292.254	303.512	290.158	294.181	320.544	344.64	339.068	295.614	265.688	343.344	321.158	361.399	298.62	302.745	327.469	273.027	271.486	275.589	238.16	249.598	302.325	347.765	344.758	282.076	415.782	312.342	319.82	301.381	259.226
ACAD11	617.325	510.721	574.84	611.779	548.5	462.186	586.011	553.234	588.16	568.385	614.574	687.924	586.841	526.136	520.94	615.908	559.292	489.404	482.134	460.518	463.295	553.837	469.772	480.971	554.855	374.807	398.079	483.569	386.161	460.518	556.926	421.136	450.579	527.477	361.532	438.933	435.753	304.009	431.223	521.326	329.014	303.643	225.547	427.905	702.582	556.201	420.353	475.837	443.978
ACAD8	383.528	329.404	406.775	400.726	380.54	336.268	353.644	379.49	493.63	514.32	361.577	370.888	402.865	381.386	382.476	375.51	389.988	350.991	413.102	342.795	358.684	343.44	361.44	393.107	346.704	344.704	335.426	411.635	442.883	388.44	375.426	327.313	391.961	376.501	418.179	382.053	333.609	321.106	368.415	342.048	330.717	331.452	339.147	424.745	356.214	365.716	317.131	324.796	354.736
ACAD9	548.5	501.915	943.67	503.17	541.779	814.642	520.442	752.025	331.884	530.243	402.13	369.877	354.657	299.046	337.122	621.66	358.458	371.027	571.908	520.238	388.154	324.305	577.751	335.128	631.304	739.227	556.201	301.787	370.048	650.459	431.472	392.69	519.684	779.319	343.833	375.01	417.223	327.897	310.844	303.643	731.033	743.047	679.449	287.667	552.148	378.331	745.902	413.972	366.18
ACADL	115.658	121.39	120.627	115.078	120.688	125.868	126.776	115.826	121.061	138.188	146.48	122.784	117.323	128.94	116.097	114.787	121.492	125.425	124.829	113.668	130.315	120.831	127.307	121.179	114.398	127.073	115.26	122.748	120.338	122.732	111.027	127.281	118.06	118.748	114.642	120.075	117.015	127.707	130.045	130.899	122.739	127.25	128.671	120.621	128.613	121.734	119.624	111.609	124.091
ACADM	1029.89	892.829	852.737	843.717	885.217	784.408	921.734	1009.57	984.136	888.382	800.528	718.05	786.72	901.694	799.215	865.888	1015.95	624.415	793.241	625.27	641.982	642.014	759.202	752.228	652.165	727.631	773.38	1119.7	980.886	817.307	930.207	744.914	904.881	968.958	1161.29	908.173	1001.26	723.272	635.78	748.962	678.042	456.072	460.772	1071.55	1517.24	788.866	1013.74	846.671	1308.93
ACADS	154.041	184.406	146.633	155.217	150.631	187.678	169.914	185.231	128.944	145.191	171.632	190.011	157.715	167.203	181.613	162.355	155.791	179.345	147.368	178.501	164.484	176.929	177.867	163.31	161.736	187.942	178.744	149.695	151.191	210.868	193.621	173.113	161.961	141.031	159.076	163.498	186.913	266.836	165.502	169.44	181.921	209.052	253.79	170.663	125.499	194.987	177.072	179.061	139.16
ACADSB	172.488	176.561	177.976	154.063	156.765	150.88	171.979	140.948	143.116	175.761	156.756	150.869	163.999	164.563	163.83	162.157	157.552	157.807	146.974	151.141	151.666	156.035	158.928	155.471	158.285	138.736	144.607	146.908	136.619	133.63	140.31	141.46	150.042	153.406	178.007	143.143	166.765	123.004	146.467	158.133	130.34	135.586	125.966	159.653	168.223	159.557	139.157	148.866	130.271
ACADVL	524.97	531.09	561.48	635.76	463.074	590.066	487.189	456.086	285.563	283.005	603.656	628.146	440.51	535.153	554.078	533.49	406.517	739.069	640.165	898.202	423.818	430.97	428.394	493.729	476.144	607.176	541.678	382.105	497.293	486.442	784.2	658.993	655.592	502.125	390.811	472.409	406.995	472.852	320.904	395.729	592.596	680.347	779.319	551.403	220.291	522.673	459.829	408.788	534.693
ACAN	114.839	109.675	114.484	113.173	114.918	114.823	111.101	107.515	117.999	117.042	115.939	111.357	125.808	124.768	107.994	116.032	117.864	116.555	107.165	114.066	114.737	116.015	116.277	116.871	108.007	107.437	106.987	117.28	115.428	114.601	118.876	114.672	117.475	122.093	119.353	118.317	125.166	111.023	107.758	114.296	110.354	110.337	116.643	105.17	119.413	124.62	126.017	115.543	114.842
ACAP1	811.599	1134.89	893.217	827.408	833.513	867.876	817.086	773.526	701.13	625.059	1183.18	1395.83	971.072	1047.49	1039.84	830.886	904.359	1091.51	1021.97	1343.94	1155.7	1258.81	943.961	805.641	979.566	817.793	821.973	1336.84	903.15	988.494	1839.58	1144.76	724.758	914.294	980.269	1203.63	786.745	1167.13	1260.99	797.06	876.483	1157.11	857.502	1454.01	161.459	1162.94	1027.59	873.165	522.441
ACAP2	947.193	702.403	808.934	701.469	575.624	440.439	635.065	529.513	548.739	362.706	597.172	557.384	800.949	724.012	793.738	854.871	787.929	558.477	689.083	352.278	495.237	639.763	704.217	761.707	797.422	645.543	498.006	1078.72	718.48	581.518	440.368	553.837	983.219	876.975	1194.31	699.118	772.364	439.149	425.406	658.007	587.236	457.969	462.017	807.992	117.733	608.461	631.304	567.259	994.202
ACAP3	119.994	118.282	119.531	118.763	116.575	109.826	121.122	128.923	120.993	111.841	127.899	150.554	143.339	129.717	134.298	134.699	123.778	140.955	129.015	171.481	123.623	133.809	127.908	117.849	116.428	117.342	117.897	118.254	114.663	136.812	155.263	152.066	146.638	136.658	147.079	133.231	132.443	141.048	115.025	129.21	113.967	126.465	114.866	134.754	121.372	122.92	128.631	115.789	120.929
ACAT1	1165.84	1076.53	950.224	1148.55	1204.73	1029.52	1189.44	1322.8	1011.6	1245.68	883.048	890.639	924.734	915.12	924.431	957.683	813.819	1060.73	1060.07	1317.22	953.875	823.577	1075.78	1013.29	996.923	1009.49	1104.96	836.151	1181.97	1304.34	1228.95	984.816	962.855	1265.84	1070.87	1113.47	1391.21	1077.95	934.708	828.504	1020.04	765.432	727.573	1183.18	1059.38	1054.79	1207.6	1180.86	1124.72
ACAT2	416.943	411.451	396.306	426.482	528.047	375.955	441.308	481.585	302.404	299.787	344.183	298.838	323.466	366.177	341.239	430.49	371.05	319.15	356.36	425.348	337.618	308.327	408.313	342.844	362.569	402.601	359.072	324.992	371.378	404.423	426.523	257.222	312.753	371.398	341.396	426.608	417.55	269.862	359.543	290.819	340.907	451.63	322.944	347.847	142.064	322.632	367.354	345.81	336.715
ACBD3	947.777	733.727	677.911	713.26	671.664	531.09	708.01	728.347	1199.5	1048.87	794.756	751.219	832.109	782.42	907.072	796.066	843.451	736.396	899.463	710.546	686.644	797.873	790.663	870.404	902.318	577.751	541.56	1148.55	981.398	752.744	1153.17	987.911	968.113	943.454	1273.24	907.072	963.761	926.292	541.384	788.176	585.179	372.664	444.354	1001.62	1436.36	919.521	785.773	773.158	1244.29
ACBD4	168.293	164.302	152.619	140.537	144.495	146.904	146.828	150.447	172.098	135.138	169.403	181.626	157.352	161.642	163.342	175.816	152.001	168.097	159.467	151.128	154.185	165.92	162.097	159.281	149.902	150.913	185.424	177.78	191.735	151.148	191.953	208.623	158.214	150.718	151.72	162.499	156.594	164.445	186.084	156.17	135.714	165.911	146.803	171.531	123.965	174.629	141.881	161.684	147.449
ACBD5	122.981	118.588	117.142	130.454	120.943	129.548	126.808	147.174	128.698	123.985	126.939	131.167	119.9	125.273	128.375	122.633	127.35	128.888	127.76	130.939	121.126	125.296	134.538	141.804	128.194	134.376	128.134	129.869	115.4	135.712	127.837	121.897	126.203	127.079	124.104	127.072	123.045	120.203	133.38	138.531	122.915	124.688	125.904	121.496	133.381	130.49	141.311	142.855	122.709
ACBD6	244.514	256.712	254.526	223.786	274.699	223.283	252.476	231.288	256.09	283.68	232	210.548	243.518	229.775	234.825	205.19	212.915	224.648	230.541	307.17	296.562	298.716	307.328	247.822	315.167	253.587	283.005	228.349	244.392	266.739	261.605	250.591	237.242	230.131	196.817	231.156	277.884	278.429	343.59	261.395	270.632	284.584	241.394	246.196	648.466	243.401	220.781	227.716	181.369
ACBD7	117.017	113.211	121.594	116.856	118.049	118.139	124.826	119.586	125.789	125.445	114.059	117.629	117.273	119.384	124.298	118.78	112.78	119.309	115.966	123.483	124.665	122.019	116.191	121.222	119.94	119.154	113.847	128.295	124.384	116.485	120.673	119.494	116.419	125.122	117.075	113.416	113.158	118.819	112.329	117.195	118.911	115.683	118.839	115.129	148.572	118.75	115.599	121.12	117.606
ACCN1	117.697	115.738	113.006	113.611	117.751	117.347	114.9	115.467	115.975	120.551	119.327	116.391	114.438	116.017	121.485	115.318	118.515	118.016	115.203	119.104	117.898	113.147	108.744	120.549	113.296	117.856	111.909	124.059	115.72	115.966	112.617	117.489	118.015	126.07	115.27	114.436	114.139	110.533	111.413	122.16	112.978	115.874	117.031	118.796	115.841	116.139	115.612	117.422	114.841
ACCN2	127.623	152.321	129.988	125.012	133.419	123.085	132.269	117.213	114.704	127.423	127.051	125.563	114.024	125.032	115.974	123.297	128.939	134.359	130.002	122.353	128.274	124.636	122.055	123.646	123.517	123.907	125.945	128.436	125.202	131.113	132.68	124.926	126.029	128.084	126.445	125.769	120.929	124.296	127.324	122.117	117.766	131.52	115.244	130.332	118.958	124.052	129.385	131.198	123.878
ACCN3	123.663	117.251	122.185	122.37	124.955	119.399	125.627	125.931	133.604	131.472	125.95	125.984	133.353	131.562	129.735	126.828	123.541	129.973	128.537	139.112	118.704	139.166	124.681	126.358	134.796	117.303	127.491	130.78	127.026	130.766	135.77	126.663	133.205	123.363	130.959	129.147	126.437	128.031	127.661	120.841	126.928	134.643	127.511	127.59	125.896	131.042	129.648	126.537	122.724
ACCN4	124.579	121.298	126.555	117.321	120.53	118.566	121.811	124.934	124.48	117.406	113.485	119.049	109.893	115.036	118.318	122.468	120.779	121.114	123.359	120.772	117.581	117.649	121.31	117.728	118.958	121.418	118.177	119.628	121.6	119.88	123.266	128.21	123.606	120.692	121.624	120.201	113.505	116.544	124.485	119.517	124.92	120.077	119.4	114.441	121.625	139.647	126.664	119.36	117.593
ACCN5	122.368	125.682	118.342	122.479	121.787	116.544	120.336	111.67	118.668	121.507	118.108	123.701	120.082	121.76	118.655	119.234	122.678	121.411	113.377	111.08	142.605	120.525	117.85	121.911	117.991	124.607	120.413	119.214	118.633	118.897	114.473	121.051	119.753	133.2	112.544	120.808	119.933	121.072	126.153	118.227	124.832	123.664	125.646	123.133	126.518	121.264	122.78	120.304	136.248
ACCS	1372.92	531.746	910.727	1535.78	1781.88	1658.49	1220.1	999.383	419.219	437.322	602.833	445.758	468.51	441.901	375.785	808.501	1125.62	602.25	842.983	429.215	502.444	433.538	809.992	1096.38	1042.02	1343.94	782.875	326.188	347.035	387.167	977.46	673.168	558.141	977.46	578.24	352.563	330.44	483.569	433.62	832.341	308.084	451.332	1017.83	400.814	815.02	540.957	450.82	439.472	541.384
ACCSL	125.104	120.746	118.196	123.583	119.247	117.642	120.735	123.769	118.164	125.435	115.23	123.356	115.597	129.702	119.76	118.141	127.482	121.244	121.091	118.306	123.334	116.362	118.149	118.708	124.487	114.427	121.233	121.332	113.805	120.936	117.452	122.951	150.915	117.66	124.491	123.563	119.972	118.194	126.823	137.394	126.338	137.351	129.727	122.587	119.721	116.985	130.47	130.695	115.711
ACD	291.903	292.351	285.605	280.094	308.31	294.624	263.577	296.605	429.014	383.898	326.451	342.284	344.067	333.656	351.234	308.869	268.637	343.77	318.152	487.567	406.995	410.058	362.82	391.025	317.675	333.804	339.117	318.653	360.281	303.269	316.911	363.069	265.485	254.555	263.323	311.509	267.753	353.921	440.294	310.116	336.756	390.527	423.579	266.836	453.633	350.562	272.178	305.691	228.915
ACE	119.953	120.36	117.657	119.461	119.946	120.331	116.181	115.569	114.666	119.162	119.768	116.736	116.09	126.668	118.022	119.708	116.256	120.619	116.207	116.214	119.657	120.421	120.031	116.463	119.132	117.665	122.165	114.03	115.202	113.903	120.991	119.624	120.587	116.406	128.751	115.973	118.254	125.953	115.892	119.781	112.507	121.054	123.47	114.153	119.102	121.711	117.399	115.122	116.874
ACE2	132.552	127.998	125.471	122.192	129.976	124.565	124.582	127.876	132.33	136.719	117.675	121.677	118.785	123.689	127.595	126.779	120.388	121.269	117.852	130.063	121.17	135.065	142.531	118.046	126.053	141.095	129.026	122.835	116.509	123.293	118.737	123.901	134.218	121.444	116.196	122.392	120.64	123.846	121.332	128.357	131.113	125.922	128.323	121.469	140.365	124.695	124.997	128.766	119.002
ACER1	115.976	119.284	117.813	117.616	117.339	114.656	117.951	115.925	115.818	118.867	119.936	118.506	118.879	113.046	119.7	122.975	116.823	124.695	117.969	116.63	120.628	124.063	127.27	118.823	118.441	119.373	119.135	122.672	119.573	121.475	116.072	121.31	113.49	116.552	119.38	118.71	120.166	118.678	118.844	118.321	121.185	118.948	120.641	120.118	122.091	125.056	124.11	121.639	118.748
ACER2	163.022	164.287	159.64	155.283	166.2	168.373	158.858	161.959	174.688	183.593	165.688	166.707	156.016	170.571	157.037	172.158	158.55	184.572	158.93	152.703	196.567	161.747	169.378	185.843	177.097	147.108	157.303	182.179	168.321	163.98	170.295	157.554	165.574	168.473	160.411	161.893	171.565	186.948	200.202	170.935	164.118	173.422	167.142	177.154	242.958	165.295	163.972	192.891	195.109
ACER3	206.053	275.589	212.113	255.586	194.008	226.8	197.086	183.517	141.347	143.802	214.235	166.686	207.751	180.755	213.852	191.599	177.665	259.263	219.927	172.905	153.688	263.42	200.053	193.888	246.165	217.604	168.785	154.405	154.027	194.374	162.58	228.64	275.299	212.996	200.297	176.695	213.875	161.961	189.628	213.315	215.863	178.937	192.202	285.341	165.702	172.71	219.348	210.672	150.608
ACHE	118.304	118.507	122.797	122.8	118.084	121.924	129.138	124.182	128.133	116.482	117.554	119.517	126.262	121.413	121.641	123.174	117.75	117.136	124.38	124.702	121.517	122.903	120.881	119.055	124.913	118.976	122.114	127.885	121.995	116.46	125.771	120.418	119.506	125.47	120.177	125.914	121.385	129.253	124.198	121.076	121.639	133.275	114.906	120.296	124.592	123.925	123.45	135.521	119.699
ACIN1	488.43	566.497	515.867	613.997	522.002	679.449	555.307	620.688	951.709	998.207	702.737	972.236	736.562	757.054	916.855	713.623	674.739	944.421	741.256	792.456	824.969	750.472	571.783	717.811	604.455	667.417	668.791	840.872	923.332	693.324	867.876	1102.09	654.609	604.216	585.302	708.966	475.028	570.222	667.938	549.041	768.229	618.239	617.454	786.409	226.897	828.504	711.725	717.06	560.992
ACLY	1101.91	990.177	1010.1	1122.5	1026.22	909.566	1121.11	1041.2	834.109	884.221	901.845	830.677	1025.92	1015.75	1050.26	1040.76	1101.59	1157.18	1007.58	669.852	857.919	813.615	868.76	960.582	805.901	891.889	1091.93	1217.28	1158.87	1033.15	980.545	1082.38	1099.9	1055.5	1173.86	1233.72	936.046	847.946	657.846	681.675	992.636	902.65	1048.65	1234.4	1568.38	987.333	963.803	912.909	1238.13
ACMSD	120.215	131.549	118.943	120.019	117.908	121.505	121.993	120.264	124.043	117.848	113.779	126.563	128.677	126.29	123.539	125.549	117.576	124.679	118.577	112.77	140.886	136.949	134.766	129.915	119.197	118.16	117.455	120.037	125.019	114.635	118.552	118.763	124.447	124.323	116.111	110.447	122.408	114.733	114.135	112.469	121.428	118.972	115.821	116.965	127.436	116.592	119.317	120.261	109.722
ACN9	582.679	555.2	581.407	600.449	710.038	619.161	548.561	683.466	677.912	500.155	659.81	564.235	554.096	497.972	411.133	430.281	531.125	477.592	475.236	269.424	503.197	492.759	435.022	419.494	419.53	526.783	574.384	731.224	431.236	405.836	454.735	460.356	361.337	422.095	589.882	558.019	660.965	525.34	647.441	552.6	412.327	417.409	472.637	565.862	815.761	443.75	692.207	554.936	353.152
ACO1	613.442	544.479	622.799	548.739	449.393	466.58	504.729	440.06	536.53	681.606	579.821	487.567	536.134	566.11	559.632	655.768	642.251	575.87	528.124	325.8	492.5	530.807	513.316	558.609	499.987	513.706	562.218	544.729	460.768	531.49	546.525	379.434	352.69	485.797	510.389	492.112	466.58	509.782	528.124	444.432	524.571	593.418	512.369	530.458	817.793	514.114	292.039	483.569	402.693
ACO2	401.859	412.707	458.12	430.632	485.081	440.06	424.887	547.294	207.468	187.791	475.937	603.797	424.698	449.99	461.228	463.549	481.431	541.384	453.283	879.253	479.601	445.247	420.011	486.167	400.537	561.704	489.503	358.635	280.953	558.009	759.092	619.846	627.017	467.514	511.687	558.009	467.976	632.319	514.026	382.944	488.948	622.09	728.134	535.58	124.903	312.247	536.222	550.487	542.018
ACOT1	147.761	148.71	150.65	144.841	168.362	169.16	154.202	169.645	128.573	130.649	166.492	157.587	157.643	166.602	172.556	164.423	159.284	153.228	157.611	223.221	188.25	167.842	190.569	175.104	160.709	153.274	198.5	156.705	143.943	173.605	164.516	182.398	161.602	181.857	171.878	156.963	168.861	177.375	173.91	172.38	137.166	196.213	197.52	156.255	120.669	176.863	181.755	174.695	161.43
ACOT11	130.609	126.518	136.96	125.275	127.502	129.137	130.858	127.055	128.883	126.572	133.778	135.607	129.886	124.4	127.943	135.711	129.116	131.755	129.964	126.416	121.034	125.271	127.409	124.434	125.085	141.761	125.822	126.628	126.215	120.585	116.843	122.552	127.198	128.917	127.12	128.627	130.023	124.299	124.114	121.232	136.282	131.6	125.153	127.452	139.395	121.535	122.609	127.836	124.8
ACOT12	113.655	121.554	119.475	128.342	124.848	112.161	113.451	117.762	130.795	116.563	123.334	125.629	131.447	112.215	113.689	124.274	111.175	120.399	131.344	116.045	122.756	116.206	121.455	116.489	116.238	124.659	116.482	123.266	113.654	123.886	120.33	120.349	113.832	114.668	123.888	114.958	127.409	119.193	128.614	120.908	114.926	111.525	122.343	114.823	115.034	116.717	122.256	118.806	127.629
ACOT2	156.599	163.93	155.482	161.666	174.435	165.978	159.433	187.138	122.285	122.074	143.24	127.582	139.328	153.005	143.706	130.849	141.547	144.464	144.303	160.961	160.632	142.124	159.71	149.052	134.475	163.43	193.538	124.523	122.937	148.726	129.654	155.249	144.655	155.888	147.33	135.887	145.94	141.012	149.741	144.603	145.171	183.602	193.261	127.096	132.257	140.294	153.964	145.69	126.524
ACOT4	237.062	267.753	204.625	202.55	246.365	267.935	230.596	227.574	263.788	244.213	260.336	180.877	155.225	223.759	222.382	235.387	251.926	163.06	218.431	201.927	220.679	194.582	221.845	237.217	189.869	164.838	212.021	186.046	243.37	175.972	217.733	193.271	156.564	187.003	167.883	249.911	188.675	232.532	241.257	193.105	182.343	216.306	153.38	166.079	579.821	213.099	196.452	202.179	216.961
ACOT6	113.072	120.447	126.586	127.279	117.196	116.945	122.882	119.513	118.944	111.963	121.119	115.722	117.774	129.208	120.048	125.568	121.964	124.096	128.423	121.259	127.809	118.129	123.193	118.853	119.662	115.111	121.138	121.993	117.437	114.738	114.155	124.652	125.828	115.649	114.873	123.418	128.612	123.122	123.041	119.619	122.97	125.843	117.028	125.286	120.343	120.656	114.391	112.512	127.166
ACOT7	131.072	123.216	124.217	123.449	122.422	127.972	127.435	127.758	124.632	122.998	121.74	120.922	123.745	125.945	122.702	120.662	119.599	127.273	125.081	125.496	124.736	124.691	125.907	119.976	129.038	129.241	126.564	122.044	120.256	123.036	126.941	120.504	128.531	124.843	124.42	121.666	126.071	120.36	129.135	126.933	122.978	130.004	130.342	119.943	119.124	128.256	123.406	122.678	127.217
ACOT8	176.515	194.114	199.193	196.529	197.723	220.369	194.688	197.925	131.099	121.781	202.55	195.006	191.009	177.057	196.804	187.196	186.167	199.023	190.194	267.313	217.583	187.474	170.547	197.797	208.667	233.985	276.39	185.249	203.753	243.941	208.667	209.901	217.675	206.51	181.802	193.7	213.442	286.142	230.349	196.096	265.13	310.259	465.032	203.388	125.224	213.315	244.423	226.01	168.708
ACOT9	361.534	339.904	380.243	384.66	387.707	398.437	376.004	412.272	305.353	290.909	381.786	449.308	508.765	449.118	434.281	363.803	417.64	367.021	413.703	396.45	370.193	397.917	440.025	430.956	404.921	443.249	499.831	519.87	382.53	514.337	422.81	488.345	576.581	459.388	378.058	506.942	494.515	377.096	401.423	454.105	415.621	446.35	504.322	479.056	618.867	416.595	537.612	418.013	531.62
ACOX1	117.96	117.361	116.395	118.624	127.29	119.289	116.118	118.295	121.031	130.786	118.056	125.981	127.592	120.538	134.72	125.016	123.657	119.218	141.367	127.287	126.286	124.033	126.537	120.57	122.334	124.907	122.549	117.459	115.245	122.657	119.438	122.937	131.154	134.206	132.216	129.535	119.921	128.829	120.798	128.153	116.821	118.421	123.97	129.177	111.22	129.07	128.424	118.285	129.362
ACOX2	142.832	132.847	136.203	134.608	139.434	137.55	128.696	136.53	143.769	116.717	142.368	140.781	140.066	142.541	135.616	141.613	129.073	135.983	149.063	127.582	134.811	142.627	123.688	151.076	134.456	172.819	172.265	214.543	155.603	147.449	140.371	142.052	186.4	141.068	134.462	138.391	169.146	147.967	165.522	150.092	273.027	156.339	426.037	179.793	373.118	145.225	156.177	141.714	143.585
ACOX3	229.628	275.989	253.678	270.212	259.975	280.487	245.773	251.96	257.51	355.342	296.852	319.776	280.171	227.481	300.274	230.898	275.989	281.798	321.003	271.707	251.076	286.483	208.849	243.464	272.255	305.046	352.97	308.31	259.031	318.416	257.111	289.245	275.669	291.859	253.715	270.829	326.785	360.329	293.186	282.797	328.113	361.12	381.924	293.402	158.972	303.425	239.785	284.101	171.979
ACOXL	115.499	112.627	110.343	113.644	118.522	118.956	116.748	113.861	120.827	114.929	117.473	117.633	117.767	119.775	119.702	114.448	110.736	114.741	116.716	128.458	122.709	113.481	114.607	114.276	113.896	114.793	115.614	121.357	121.554	119.479	125.062	127.201	112.906	123.444	114.138	118.164	111.054	116.305	112.089	130.757	123.177	116.111	116.774	121.462	132.718	130.701	120.491	115.365	122.461
ACP1	2294.13	2268.64	2829.51	2583.13	3119.22	2542.75	2659.52	3406.36	1623.4	1293.75	2259.31	1964.59	1887.22	2370.26	2157.52	2413.87	2425.16	2206.84	2156.88	1557.58	2190.52	1622.78	2564.47	2323.25	2261.43	2451.12	2744.62	1367.07	1701.37	2255.24	1294.61	1526.98	2542.97	2674.53	2362.19	2712.65	2514.86	2070.9	2350.63	2225.94	2586.5	1893.19	1867.16	2495.51	413.897	1921.85	2194.76	2233.49	2381.74
ACP2	299.767	287.155	277.356	306.627	256.935	289.412	260.372	388.58	197.871	258.091	364.258	320.544	325.237	285.115	296.898	318.057	270.177	294.94	245.861	404.233	314.925	291.814	300.462	302.325	268.202	310.354	312.502	226.654	303.882	319.537	277.151	411.91	301.162	227.099	276.654	274.373	276.32	366.18	238.801	232.362	401.257	395.254	447.96	223.428	142.615	313.093	310.932	262.379	354.949
ACP5	266.052	249.689	258.255	207.562	209.85	237.538	238.227	311.038	168.471	163.904	168.302	194.165	185.116	149.995	181.388	177.596	178.035	134.493	147.857	352.69	211.865	210.037	233.869	188.572	232.532	353.381	329.309	176.089	143.939	194.917	273.984	259.409	174.488	198.381	220.911	329.172	220.172	423.818	189.194	184.505	346.627	425.206	527.179	125.005	125.13	254.018	164.995	202.254	162.24
ACP6	201.946	242.601	215.84	191.89	196.353	168.843	193.888	185.424	202.007	233.234	188.302	214.079	163.518	161.229	167.236	170.856	164.731	163.174	168.492	259.732	205.57	204.853	218.559	172.415	180.755	203.568	171.935	207.306	163.665	183.07	185.532	138.02	154.875	180.137	159.204	155.73	170.604	172.032	232.301	183.799	234.484	259.651	154.548	183.273	340.585	196.837	201.251	183.964	142.995
ACPL2	297.098	300.47	306.18	352.913	305.063	255.871	309.152	282.234	341.328	429.023	293.38	282.137	300.013	284.468	291.587	345.531	352.801	259.771	273.822	192.724	290.854	255.781	337.457	302.101	351.449	267.019	307.113	374.843	396.437	247.937	260.333	203.106	232.644	284.369	314.809	290.671	289.639	253.891	282.851	313.552	252.048	240.466	306.408	363.684	132.798	282.293	302.154	251.829	291.425
ACPP	195.425	163.979	180.191	233.628	200.741	198.226	180.581	212.44	330.389	228.38	227.054	442.218	335.585	202.224	203.407	243.704	179.245	256.363	239.475	206.163	194.351	265.065	211.371	237.192	237.303	347.085	259.289	347.267	242.207	338.76	229.274	423.652	382.31	325.894	282.879	235.325	355.404	276.32	210.646	465.922	453.704	251.615	336.87	299.672	360.466	223.983	230.459	237.898	262.962
ACPT	133.748	133.32	129.691	143.122	137.299	134.724	146.67	143.544	134.991	130.002	138.606	147.018	136.466	134.402	135.31	140.208	135.776	146.524	133.657	136.448	149.028	139.662	137.88	132.171	140.577	144.765	148.669	133.26	148.47	136.955	141.744	125.409	136.433	140.525	137.847	139.287	134.748	129.809	142.976	136.746	151.53	132.587	148.846	131.253	152.869	139.647	154.775	136.978	131.202
ACR	119.35	122.669	122.07	126.369	121.085	113.88	124.203	121.067	130.235	127.939	118.077	129.198	120.528	123.043	125.543	121.525	129.957	121.632	122.131	125.055	113.748	129.302	115.519	117.84	133.693	129.543	118.152	118.148	127.525	123.289	117.998	123.953	119.605	128.697	114.263	126.269	122.528	118.476	127.252	118.873	118.09	122.234	118.183	128.874	131.525	134.54	125.243	125.743	122.82
ACRBP	508.133	1138.4	831.421	1118.75	963.761	777.904	925.385	909.396	1148.86	1328.32	1098.69	1559.47	1192.5	1040.61	1052.7	674.082	876.483	1687.64	1318.27	983.794	2059.54	993.894	1194.31	1418.86	932.356	830.374	1671.77	617.051	731.866	1014.93	484.557	706.448	3805.21	312.247	552.148	1050.94	1124.31	2219.47	2200.07	3269.11	989.683	1721.12	1337.32	1719.46	135.666	460.91	1635.12	1190.77	404.702
ACRC	190.752	191.093	163.44	178.866	189.706	179.394	211.733	204.005	275.072	344.64	200.218	198.527	214.892	186.298	186.248	197.621	210.911	187.262	225.065	185.985	166.518	182.217	170.167	178.105	174.089	150.026	221.181	206.236	215.432	179.477	213.722	180.318	181.861	206.444	201.964	187.636	202.368	238.45	169.715	229.713	175.773	153.681	158.599	164.123	567.854	223.358	219.256	193.723	169.962
ACRV1	114.886	122.136	123.843	121.085	121.646	120.865	119.155	123.876	115.276	124.374	123.136	115.889	121.26	130.68	119.086	124.657	117.193	124.37	117.429	125.751	115.005	122.983	121.905	123.213	122.857	119.122	123.423	117.314	128.393	127.007	122.928	120.57	122.689	113.846	123.913	128.996	127.33	124.681	124.927	123.631	119.926	122.647	123.245	123.019	138.416	121.519	131.444	126.96	119.367
ACSBG1	206.696	213.333	369.795	366.385	293.619	171.099	218.506	162.982	252.334	598.318	240.625	270.56	212.504	261.67	210.087	182.297	185.164	327.469	297.287	192.005	260.827	199.367	296.155	341.919	190.287	264.756	186.562	196.837	198.942	308.428	166.118	141.064	333.143	150.571	190.624	164.731	183.21	358.755	519.766	457.969	262.303	381.143	225.657	355.342	234.284	138.706	179.127	246.084	121.209
ACSBG2	115.27	118.15	115.807	117.611	119.526	114.129	115.509	121.624	121.689	120.391	115.151	113.565	119.372	115.541	117.606	123.274	114.549	116.269	115.471	119.489	112.471	119.742	120.157	125.159	120.299	117.455	124.767	128.796	133.538	120.914	118.981	111.454	119.5	123.471	118.088	122.11	116.181	119.794	117.047	123.071	120.016	120.618	119.404	117.2	131.264	117.739	121.025	120.968	117.721
ACSF2	190.443	220.413	171.134	185.231	185.345	189.179	207.184	188.643	283.716	289.071	195.112	202.368	223.859	193.574	221.517	213.333	212.574	245.355	222.64	269.608	216.005	242.458	202.916	205.056	208.873	189.214	178.965	215.358	241.885	189.69	263.896	231.433	197.925	227.543	194.257	235.304	186.883	240.999	187.908	169.901	140.124	188.271	196.221	181.475	245.962	211.103	178.079	216.763	195.983
ACSF3	292.51	138.084	288.971	135.743	138.115	136.501	296.354	261.574	127.023	146.688	131.932	128.538	131.931	247.995	249.911	258.255	140.044	134.138	135.775	142.011	305.301	313.599	142.79	301.111	327.846	144.357	155.887	223.529	239.058	130.37	279.294	281.191	221.441	142.329	138.943	263.286	269.875	133.012	152.333	234.309	126.289	465.379	336.32	136.905	439.97	241.855	142.056	135.595	246.718
ACSL1	511.059	355.596	459.19	586.712	416.074	844.915	404.463	605.018	782.636	451.332	655.895	1240.77	1736.99	939.675	792.456	963.466	794.532	718.985	1435.85	568.385	662.169	1268.68	792.642	1151.51	1300.75	732.49	975.389	4003.75	1381.91	1882.16	895.144	1252.52	1845.79	1080.81	1160.97	1078.34	2148.54	1456.92	1196.93	3634.11	996.202	682.082	1427.32	2322.77	2580.57	1967.57	4995.63	1147.17	1514.63
ACSL3	218.167	222.54	215.12	213.25	185.762	185.164	194.543	188.572	150.224	170.318	196.606	166.068	193.989	199.728	204.303	216.507	202.224	181.265	191.413	157.121	172.738	167.711	173.891	211.169	177.113	179.216	163.853	260.767	202.957	173.032	169.236	153.368	176.633	182.557	232.632	169.125	181.001	167.577	148.019	162.78	168.588	161.56	182.945	206.368	306.897	218.793	207.306	188.255	223.407
ACSL4	134.652	133.666	135.819	131.234	138.13	127.929	139.428	135.484	128.587	139.439	127.12	130.42	131.926	133.194	140.537	148.314	148.936	133.362	149.189	137.387	136.28	134.988	136.148	127.144	137.196	131.973	128.818	134.372	129.345	131.157	137.803	128.505	133.341	150.943	132.501	134.293	130.454	119.331	132.237	132.243	125.444	125.679	141.115	127.63	129.034	129.817	125.666	137.562	142.04
ACSL5	126.853	121.793	124.685	123.354	137.023	128.038	132.12	150.639	137.463	123.463	131.394	123.768	129.64	134.421	139.469	150.277	137.246	127.638	130.64	145.971	127.846	129.973	138.297	127.354	137.69	135.499	133.584	127.861	138.128	128.883	125.068	124.324	140.414	152.889	129.912	147.037	122.475	155.776	129.487	127.627	125.745	132.764	149.436	128.484	125.426	119.854	124.236	134.509	141.578
ACSL6	122.983	119.887	124.1	121.644	125.656	119.172	125.363	127.915	121.666	119.742	125.105	124.119	120.001	127.676	123.374	117.917	130.219	123.842	116.421	123.564	129.25	121.983	124.457	121.797	126.61	118.551	123.779	127.156	120.552	126.97	121.525	117.299	116.766	125.656	129.147	125.079	126.562	128.6	126.416	119.847	145.496	133.226	118.272	122.614	119.814	123.52	117.301	126.701	127.39
ACSM1	116.997	106.853	114.264	121.014	106.198	109.05	111.148	118.319	117.49	115.055	116.035	121.717	113.901	119.647	113.314	115.034	111.882	115.255	115.766	116.541	114.196	116.906	109.648	120.648	115.389	115.658	109.351	125.402	109.655	119.325	115.466	114.165	115.117	113.127	114.74	114.702	112.003	110.591	118.49	115.978	114.226	115.067	114.978	119.53	118.539	118.076	114.578	114.882	125.313
ACSM2A	118.551	122.499	123.788	114.325	122.754	117.416	119.428	130.221	120.524	117.133	116.284	114.721	127.601	112.949	113.927	116.207	122.536	117.711	126.128	118.288	116.456	133.668	122.012	117.3	115.918	119.16	117.649	117.541	116.216	113.305	115.057	120.774	116.588	120.958	122.165	118.863	114.965	126.032	118.717	118.541	118.093	120.268	114.493	114.006	152.934	114.22	120.99	124.846	113.692
ACSM2B	118.636	114.145	115.249	120.412	122.243	128.051	120.668	122.439	117.693	124.221	117.402	118.817	121.68	114.418	120.368	124.363	117.154	117.219	118.07	122.305	125.744	130.81	121.421	124.167	120.402	123.714	117.911	122.971	121.573	121.093	114.14	116.879	117.778	116.194	119.502	122.416	115.393	123.01	121.88	120.126	130.336	119.833	116.333	116.813	121.029	118.523	114.417	122.997	125.572
ACSM3	147.205	147.461	141.005	137.424	150.143	143.664	134.304	150.965	142.623	165.63	147.571	138.299	129.97	140.017	137.967	137.363	131.524	135.622	148.483	138.084	133.048	136.095	135.347	133.724	134.565	132.177	134.943	123.65	137.785	138.259	139.733	124.543	135.263	143.136	145.792	142.329	147.385	131.663	137.873	146.192	136.652	125.53	119.781	141.64	247.174	130.581	129.756	144.554	127.35
ACSM4	118.8	131.397	124.971	119.968	120.927	121.766	119.847	117.937	125.481	128.22	111.241	114.681	118.346	124.41	121.307	124.348	114.046	119.052	114.421	117.951	118.558	119.145	115.842	127.022	121.21	118.12	121.59	117.849	122.823	115.983	121.221	126.626	116.04	118.928	121.024	123.203	117.552	117.422	119.139	116.119	126.276	132.428	120.513	109.331	120.877	119.839	125.907	117.982	120.988
ACSM5	118.626	121.012	116.173	118.549	113.204	121.901	123.165	119.151	124.356	119.408	122.753	122.036	117.739	122.702	123.99	123.8	117.82	119.826	113.597	125.277	134.666	119.377	123.385	121.094	120.191	117.523	122.808	120.582	124.655	122.581	118.723	118.422	118.388	129.812	129.176	121.304	119.633	123.006	123.56	115.596	119.435	120.423	126.077	130.243	116.067	120.206	120.868	122.335	133.055
ACSS1	558.967	631.492	533.196	594.859	470.305	660.16	642.558	693.324	563.243	570.113	606.714	548.739	505.492	528.713	611.619	410.241	458.791	606.021	459.92	971.622	616.754	626.874	547.294	474.539	556.614	570.113	569.47	487.954	744.59	498.496	573.65	562.741	502.895	494.454	473.477	563.243	390.364	588.861	424.698	398.13	568.278	580.891	490.109	340.458	197.217	662.344	511.687	560.728	458.214
ACSS2	137.961	133.164	139.633	132.517	143.645	141.335	134.572	141.727	145.312	128.637	143.049	157.179	142.504	155.683	147.152	136.012	138.318	142.574	140.837	134.532	149.76	137.558	153.517	154.087	146.307	164.911	161.717	146.428	135.861	155.965	133.772	166.815	154.689	159.678	151.484	151.834	164.563	144.611	165.315	153.326	162.73	154.452	193.335	152.928	130.902	134.984	136.765	148.437	147.8
ACSS3	150.771	139.318	136.63	145.559	147.068	147.395	160.845	140.005	141.091	149.661	135.359	152.238	132.695	135.313	133.226	148.855	132.491	134.002	145.926	144.527	138.318	135.517	150.256	136.415	135.607	170.888	166.553	141.343	142.143	145.029	133.5	132.688	131.199	139.889	141.663	134.436	137.884	136.335	136.649	140.481	134.329	143.335	136.409	142.615	129.196	132.798	141.657	154.386	135.367
ACTA1	116.722	117.761	123.155	122.354	121.151	119.845	129.486	119.306	133.824	118.855	119.513	126.772	119.792	131.361	124.125	116.908	121.991	127.14	126.183	131.117	127.794	123.871	123.058	114.987	124.064	128.508	115.083	116.07	122.609	118.552	134.768	126.169	119.442	131.084	123.364	124.311	131.528	126.467	113.019	131.174	119.98	120.132	122.05	127.825	121.789	122.751	113.323	124.251	110.518
ACTA2	975.389	913.542	969.303	864.033	1623.84	1045.34	1072.33	826.99	532.491	489.611	548.739	526.614	543.452	605.136	331.226	530.331	774.526	656.954	658.172	716.68	450.503	541.779	662.492	619.995	306.286	797.25	835.193	461.631	868.584	686.788	463.216	349.33	496.608	453.369	446.104	719.865	410.916	798.955	589.163	307.6	313.649	669.89	1322.35	376.459	1537.15	428.308	653.24	798.105	695.891
ACTB	17713.5	17713.5	16475.5	20048.7	17596.2	15089.4	17596.2	17596.2	19911.6	22716.3	19784.9	25399.1	21314.1	19170.8	20472.1	22109.7	21953.8	19956	24182	19680.1	14562.4	16033	16772	18388.2	14355.9	17509.9	17069.2	23915.3	23747.1	22716.3	21953.8	22109.7	24876.3	19867.7	24347	21915.5	20001.9	23103.7	17069.2	19027.9	22677.6	16772	20747.6	25086.6	9650.12	20191.2	18610.1	14906	22266.1
ACTBL2	119.64	113.474	122.436	120.242	134.954	130.334	127.469	119.886	124.459	121.697	112.252	121.369	113.436	120.414	119.066	124.648	126.326	121.115	124.974	133.207	122.165	112.454	119.561	120.468	121.678	119.759	123.347	115.808	113.744	124.677	119.013	128.081	130.748	124.445	125.704	114.124	117.908	133.646	117.174	121.357	116.164	122.675	122.41	121.001	132.095	116.133	117.654	123.72	124.628
ACTC1	117.041	117.918	119.914	122.045	117.126	118.453	122.912	121.566	123.005	120.271	123.607	121.985	117.45	117.283	121.763	117.471	120.988	116.257	117.909	121.935	121.99	119.629	121.65	117.156	121.272	116.441	121.011	118.24	122.603	122.605	120.607	125.483	125.37	123.855	113.953	123.339	117.569	118.977	122.267	123.971	123.161	117.617	118.225	116.587	128.595	125.794	120.436	119.108	118.41
ACTG1	15142	15297	15953.8	14096.6	14875.2	13325.6	14621	15619.8	11674.4	9363.78	13891.4	13831.8	13758.8	14924.7	14021.3	14879.4	14466.6	12815.2	13132.5	12778.3	12578.5	10214.3	12905.1	11311.8	11871.3	15022.3	12656.8	11568.6	11710.7	14657.4	13822.6	12687.3	14886.6	17463.1	14973.1	15164.2	15388.1	12459.4	11906.6	12206	14155.6	15811.6	17376.6	15095.6	2857.99	11131.4	11407	10024.9	14540.5
ACTG2	121.203	112.105	122.653	114.847	122.736	117.618	123.889	121.423	120.563	120.594	122.471	107.774	113.585	111.707	125.194	116.36	111.769	114.647	112.778	126.941	118.158	116.798	118.807	118.402	116.576	123.696	146.06	130.772	129.393	111.846	125.596	122.206	115.583	118.086	116.77	135.386	146.528	109.814	121.729	111.428	106.312	119.705	130.368	120.758	125.792	127.684	115.484	136.846	120.468
ACTL6A	918.107	772.759	824.351	819.636	931.095	738.433	741.324	865.299	932.463	961.029	776.814	770.472	818.961	932.625	867.35	1081.29	882.468	673.528	796.042	831.71	732.573	675.225	810.247	812.987	742.729	615.21	677.833	833.945	1065.86	956.786	897.748	744.025	790.044	1010.78	1064.94	1065.17	900.107	647.003	804.438	666.892	599.262	585.309	560.181	1058.15	344.798	883.573	726.392	810.068	1114.29
ACTL6B	133.736	121.115	123.53	134.926	117.212	121.689	123.001	121.786	121.531	115.606	150.002	124.717	123.257	120.269	124.832	120.309	119.522	136.404	132.145	128.973	133.072	123.356	141.407	124.9	121.846	124.191	130.161	126.944	134.651	128.252	131.819	148.454	118.923	132.947	126.347	131.275	120.159	130.326	119.792	125.107	122.034	132.12	125.846	123.621	132.289	129.756	124.719	131.024	122.129
ACTL7A	111.616	110.362	113.913	117.569	115.948	112.761	110	115.103	119.912	110.428	110.728	121.462	115.023	118.769	111.79	111.761	115.434	112.321	115.178	110.312	109.638	113.498	118.662	118.437	118.783	113.888	112.558	124.903	115.841	120.892	105.415	116.375	109.897	114.286	112.715	115.427	113.816	122.187	112.64	122.206	111.012	109.964	106.932	107.894	122.285	121.993	107.484	119.588	111.131
ACTL7B	119.464	127.583	116.31	118.908	118.149	116.358	124.062	117.757	114.367	118.785	117.51	122.694	114.999	107.49	131.667	124.45	116.349	123.371	121.34	124.669	117.073	122.533	119.811	124.851	121.78	119.283	122.218	118.485	120.945	118.479	112.11	127.408	116.288	118.831	129.897	117.4	120.027	134.316	113.809	120.226	119.037	119.195	121.618	121.194	124.671	116.491	119.871	120.954	122.345
ACTL8	126.914	138.312	119.724	117.973	126.906	134.363	120.933	134.465	134.339	115.27	129.534	132.176	122.868	130.434	120.429	113.388	133.085	120.012	117.543	126.974	132.221	118.277	118.212	119.211	121.159	126.251	134.552	121.08	128.012	130.054	138.333	117.184	123.861	123.668	124.251	116.876	120.611	119.215	119.122	131.796	125.125	124.227	121.799	122.488	138.295	132.694	131.456	124.929	143.148
ACTN1	1375.28	2310.5	3185.8	2802.99	2118.49	1885.23	1957.18	1297.68	1048.49	1518.84	1870.07	2747.72	1636.69	1792.12	1341.43	1349.41	1300.75	1919.92	1737.99	991.192	1720.19	1372.42	1483.24	1291.81	1331.76	2189.68	1550.8	2041.02	1194	1671.15	1753.44	1031.84	1657.73	1035.24	1322.35	1350.48	1166.25	1380.28	2747.72	2342.71	3055.17	2866.03	2416.85	2337.29	629.341	1053.02	2208.84	1555.26	761.707
ACTN2	110.969	114.468	122.63	119.004	118.436	118.404	121.28	111.954	129.509	117.093	114.484	133.975	121.264	121.254	113.707	118.064	109.689	121.346	122.097	119.117	122.529	126.106	118.383	121.742	109.229	117.353	118.715	115.888	114.254	123.832	125.169	123.382	123.396	119.209	124.24	115.403	113.558	117.548	112.163	110.893	121.939	128.145	120.93	123.419	133.292	121.737	124.509	116.837	124.778
ACTN3	128.584	120.845	118.439	123.986	131.177	128.389	119.762	127.362	125.79	140.948	119.288	128.625	122.878	126.874	123.609	117.414	122.328	129.593	125.799	133.189	117.528	118.024	119.045	137.976	123.736	124.186	127.918	119.094	130.113	121.419	118.252	134.167	129.711	124.709	123.901	129.326	128.904	113.187	123.96	121.346	136.248	127.333	126.683	120.23	135.306	125.843	120.891	130.182	123.615
ACTN4	517.151	553.837	438.531	536.715	521.899	583.544	559.735	694.545	582.53	507.719	805.641	890.374	788.433	759.092	823.782	654.309	730.807	874.187	720.837	1047.16	897.119	793.061	694.2	758.893	594.859	692.616	738.532	684.904	515.757	706.448	716.68	834.733	562.452	649.976	487.189	686.217	654.166	710.129	902.01	751.452	764.259	869.046	1029.52	526.614	652.623	769.735	602.833	582.131	569.094
ACTR10	968.421	861.964	802.923	912.261	905.133	738.323	924.213	763.835	720.692	655.768	947.485	1008.55	949.258	1018.74	858.272	868.794	1003.14	812.058	807.41	754.732	889.441	903.15	1023.26	1031.58	969.912	691.112	726.663	833.295	646.837	843.451	756.432	704.728	1081.48	899.215	1335.27	970.17	1281.67	1282.19	1060.07	1321.82	886.567	675.055	784.79	992.956	370.12	856.467	675.56	818	843.451
ACTR1A	872.94	926.292	1033.79	904.908	857.755	784.79	750.293	770.263	428.677	577.35	663.865	595.379	598.579	655.433	680.347	550.577	719.865	696.419	694.94	673.168	726.271	604.216	671.344	700.365	555.307	938.961	823.577	559.847	514.4	760.514	588.16	596.511	418.483	593.418	470.305	564.33	568.168	646.289	556.382	541.132	984.474	923.332	1263.46	466.787	1589.9	529.032	675.384	583.295	513.945
ACTR1B	503.388	583.295	546.163	539.503	609.898	608.317	548.28	602.691	521.217	490.988	596.629	589.695	525.19	614.144	593.967	565.528	519.235	576.496	486.271	789.231	716.118	603.331	668.604	488.646	627.557	678.999	610.634	510.941	479.907	550.104	565.396	593.731	414.281	442.464	429.943	591.557	464.942	596.021	578.719	499.902	543.452	684.415	616.91	504.729	194.987	575.987	417.729	589.281	349.74
ACTR2	7664.42	5511.4	6410.23	7579.11	5751.82	5131.71	6676.97	5584.4	6298.48	5340.58	5043.99	4312.08	6702.83	7341.35	7045.18	6676.97	6229.65	7251.84	6728.5	4701.48	3923.43	4659.74	5648.2	5724.06	5471.04	5471.04	4153.45	7664.42	5811.86	5435.57	4836.57	6876.18	7459.97	5990.08	7876.43	6306.71	4904.74	4469.31	3709.24	4707.21	5446	3589.04	4148.78	6254.04	1032.1	5688.47	5256.25	4052.66	7563.6
ACTR3	1213.14	958.859	759.327	742.098	1341.43	822.932	939.675	1000.95	2672.26	2100.59	1982.2	1912.21	2145.84	1968.47	1870.07	1742.76	2148.54	1371.15	1788.25	1003.14	1205.57	1615.97	1799.25	1849.8	2450.22	668.791	640.454	3393.55	2137.37	1600.83	2753.98	2048.45	2117.27	2713.61	3084.09	2492.38	2732.99	1573.45	1686.63	1995.33	742.098	593.869	683.158	2777.06	4503.31	2130.98	1642.61	1833.1	2942.92
ACTR3B	143.266	150.435	141.53	145.613	143.853	131.468	140.877	132.102	129.713	125.584	147.729	133.393	139.133	147.344	144.388	136.793	142.799	149.128	149.377	136.545	142.417	131.157	139.177	146.671	140.537	139.619	142.072	131.948	124.853	127.591	123.3	126.665	144.851	131.555	129.886	138.085	136.644	131.172	145.475	146.709	132.21	135.513	137.135	136.121	124.796	133.186	129.881	125.316	130.477
ACTR5	359.138	331.722	378.569	340.702	336.811	346.319	385.346	372.858	352.857	375.841	312.342	350.151	281.073	303.026	333.704	333.189	299.101	335.809	364.19	521.804	373.036	340.988	356.69	409.673	402.932	379.014	426.511	253.928	285.605	335.987	300.933	336.87	327.177	345.557	294.713	366.837	294.673	264.961	340.121	323.287	270.901	392.938	299.416	316.707	671.809	321.966	332.514	323.393	265.366
ACTR6	826.482	839.738	642.909	662.799	729.287	587.874	707.106	645.225	701.469	737.537	644.916	518.258	655.433	587.119	579.306	574.032	620.822	450.503	622.641	311.79	502.013	600.377	579.538	622.337	562.654	493.844	553.724	657.866	560	521.135	644.766	544.354	433.538	591.669	825.145	596.265	842.033	833.295	578.604	552.785	469.027	472.567	478.56	577.751	1683.35	664.244	507.719	533.911	638.079
ACTR8	228.743	216.162	209.403	205.398	207.751	189.806	222.262	216.456	256.678	231.461	202.898	179.077	188.206	201.194	198.261	219.857	247.016	198.59	193.528	164.87	200.394	192.079	189.998	186.139	170.589	210.037	199.565	222.837	242.871	183.626	189.437	192.936	172.007	165.157	196.491	170.391	204.772	184.606	169.948	180.303	214.593	207.405	215.782	248.39	361.932	187.431	174.67	209.485	198.104
ACTRT1	169.323	166.231	180.581	176.392	163.114	185.424	151.211	157.755	156.141	168.621	186.329	190.898	206.935	191.369	173.328	159.548	150.138	170.449	149.171	160.506	188.35	170.865	174.602	191.555	178.73	185.424	172.572	156.161	161.403	157.011	153.483	165.346	140.041	166.231	147.326	171.399	142.804	238.636	174.593	156.303	246.123	206.404	199.405	154.867	241.733	157.159	159.953	150.381	150.639
ACTRT2	112.397	113.052	119.693	116.829	112.885	109.858	114.072	116.476	118.311	119.629	117.068	112.626	111.601	111.506	109.752	114.382	109.678	119.749	109.193	110.869	123.806	113.044	109.531	116.465	111.475	114.764	113.431	111.238	113.995	119.453	109.099	110.141	123.053	113.844	114.818	121.148	114.49	116.496	117.133	112.085	119.591	112.441	116.828	109.869	106.616	115.178	115.769	112.258	122.601
ACVR1	771.328	845.199	895.373	711.005	608.065	519.456	634.269	549.967	989.683	1350.98	763.042	930.828	927.728	837.486	828.676	632.589	711.725	655.433	875.152	503.059	702.918	816.701	749.171	979.883	878.248	598.697	598.19	905.133	748.358	833.79	652.907	554.855	1065.67	951.406	1202.9	904.359	879.708	1169.91	1068.84	1060.73	626.415	648.157	675.709	1231.82	1900.92	731.033	638.731	901.766	764.47
ACVR1B	129.936	130.452	126.658	126.281	135.743	125.499	125.714	128.203	129.642	123.622	129.942	126.322	133.909	130.88	127.46	134.435	143.907	133.314	135.724	145.845	126.371	131.362	133.37	136.24	136.38	134.038	137.38	132.598	128.476	133.145	123.552	139.03	167.965	143.877	135.411	135.098	145.307	124.296	140.638	154.701	134.661	129.79	136.957	148.102	124.004	126.714	138.948	127.598	142.252
ACVR1C	134.134	142.337	129.64	132.361	124.689	130.697	123.123	120.797	139.415	148.876	124.237	133.307	132.71	146.136	129.129	116.155	120.368	136.895	131.729	114.874	127.5	143.053	123.746	132.649	128.585	128.761	132.647	129.24	119.997	121.164	130.698	122.186	122.895	124.994	130.46	123.586	130.213	129.148	136.196	127.797	122.307	123.435	124.828	125.701	153.374	131.457	127.852	124.355	118.178
ACVR2A	179.631	184.407	181.269	164.882	167.306	164.962	178.211	175.877	218.824	214.134	192.664	188.286	187.183	188.028	203.799	203.555	199.384	193.064	194.137	204.838	185.871	208.961	188.486	174.975	222.161	167.598	147.619	211.153	195.313	155.964	169.172	188.982	211.252	232.062	219.533	163.607	182.593	204.9	179.504	210.638	148.396	134.481	132.59	190.631	294.074	209.241	157.252	181.893	150.867
ACVR2B	113.778	120.183	117.46	115.995	121.472	119.173	113.921	119.678	121.401	123.279	128.616	121.513	122.672	120.303	120.617	118.224	116.248	115.627	119.424	119.19	124.982	122.893	122.105	119.303	117.256	114.981	119.834	120.637	124.047	117.599	118.746	120.014	118.926	117.757	116.796	120.068	117.721	114.562	115.348	115.065	116.936	120.152	115.548	115.245	126.297	115.838	122.081	113.736	140.465
ACVRL1	138.027	132.142	144.605	133.693	125.296	134.133	147.774	133.868	142.33	122.148	130.939	139.809	126.867	130.144	121.97	138.109	116.911	144.378	129.496	119.026	115.725	136.644	129.659	130.583	130.511	165.691	246.24	173.034	162.019	146.745	144.546	139.987	147.729	183.114	152.296	156.872	143.405	154.961	131.852	121.533	205.712	235.916	262.087	138.802	269.277	147.846	165.176	157.86	130.897
ACY1	173.469	180.349	178.421	166.032	205.077	199.325	179.58	172.572	153.44	144.331	186.472	185.576	187.577	195.335	173.338	170.538	181.093	190.51	185.116	197.66	177.897	214.257	177.45	158.38	179.538	214.468	231.156	162.856	169.901	198.706	186.063	217.652	161.692	154.27	180.001	184.992	193.942	218.712	180.258	173.96	179.494	225.52	233.053	184.892	116.285	188.35	176.941	191.025	145.455
ACY3	119.653	122.031	115.843	120.983	118.1	117.43	109.469	120.724	128.799	112.858	122.23	114.131	130.732	124.205	121.349	119.61	131.382	118.665	109.752	148.855	133.042	127.972	113.534	128.091	112.813	119.109	125.123	120.95	122.886	118.738	137.306	131.424	116.801	125.015	118.581	126.699	136.696	119.525	117.748	117.511	120.151	128.085	123.535	128.709	116.21	122.926	123.585	131.17	129.049
ACYP1	242.207	288.456	271.04	268.533	341.158	330.639	322.161	339.531	249.124	298.716	249.457	250.175	231.269	227.857	192.744	225.929	230.726	224.891	249.098	210.238	228.237	206.033	231.433	244.74	209.971	328.363	257.047	209.994	224.914	251.847	194.773	234.857	233.205	244.341	176.878	227.689	261.985	186.988	244.026	205.416	198.471	280.225	324.824	205.506	269.135	254.696	250.562	261.185	194.707
ACYP2	188.82	210.416	193.732	197	228.91	221.467	198.603	252.2	263.259	249.226	246.525	195.343	222.447	246.126	250.653	214.439	198.443	217.593	200.667	285.992	244.975	222.134	239.944	227.927	213.497	214.221	243.672	230.65	283.327	226.258	202.838	204.56	208.432	205.697	193.669	225.293	242.246	236.651	252.659	245.626	189.94	216.845	226.025	224.574	196.028	217.908	200.149	235.639	225.826
ADA	987.63	1045.34	908.385	902.318	1089.69	1015.26	855.31	1391.21	1017.22	1089.03	1126.99	619.677	772.748	905.133	854.36	785.153	1092.66	1228.22	747.848	1778.17	1107.25	812.274	1141.13	1056.09	937.461	696.072	1038.56	530.807	1615.97	1513.53	1052.37	970.755	517.268	1129.66	688.392	1103.91	1010.12	682.082	888.521	588.313	540.172	1158.38	769.047	544.995	370.433	941.426	795.377	869.319	1028.51
ADAD1	119.604	118.424	118.109	112.727	113.938	117.531	130.072	122.348	110.469	119.097	125.353	119.883	114.922	126.919	116.821	126.934	114.326	118.103	109.281	126.711	117.119	121.694	117.275	119.552	125.125	115.275	116.387	117.952	117.319	117.652	116.316	114.264	119.227	126.729	113.541	114.572	116.605	110.436	115.626	131.699	113.389	119.299	115.425	121.916	113.951	115.161	120.202	126.089	127.181
ADAD2	114.447	110.562	111.4	111.076	114.516	119.389	108.59	111.105	113.509	112.782	110.567	113.031	109.249	116.335	109.585	117.243	111.284	116.336	119.569	127.515	116.625	112.74	107.65	115.02	124.607	115.35	112.883	118.102	117.432	123.099	115.425	104.32	114.794	107.643	104.006	113.271	112.772	117.517	110.107	116.479	109.047	112.034	114.952	115.679	138.94	110.508	122.345	114.826	129.101
ADAL	201.744	203.503	192.615	182.313	188.675	170.417	179.606	189.355	227.752	226.042	173.012	173.428	208.059	169.381	173.167	182.932	192.998	191.185	194.079	223.833	262.758	208.299	178.132	154.775	197.776	233.053	208.823	202.997	223.599	170.473	197.029	195.519	181.572	206.717	192.257	187.447	215.958	225.607	201.273	178.717	182.584	204.027	270.328	183.436	193.869	205.794	183.314	168.165	166.712
ADAM10	407.506	311.734	383.711	342.377	331.077	279.368	372.589	335.561	190.468	178.981	305.341	303.825	392.112	499.283	416.831	469.935	506.579	381.352	416.632	281.698	341.321	263.833	394.131	498.765	478.003	306.87	309.879	766.107	396.166	281.704	237.299	248.28	587.519	532.03	779.718	419.989	468.123	221.83	277.508	454.842	254.667	191.495	219.471	619.636	266.771	453.921	343.997	301.243	631.648
ADAM11	127.338	122.374	110.175	122.868	119.237	117.498	133.929	122.009	114.2	116.201	117.745	117.113	113.007	120.704	113.692	116.406	113.046	120.82	118.798	115.52	118.656	110.666	108.001	122.915	113.698	121.571	116.56	125.596	124.469	145.455	118.69	124.112	117.958	128.095	119.094	127.228	112.594	115.832	130	124.357	127.879	130.629	113.962	119.413	116.042	116.492	116.669	111.301	127.281
ADAM12	125.206	125.092	127.501	122.598	125.964	128.363	126.694	129.777	127.429	122.236	128.165	121.9	122.62	128.963	125.312	129.471	124.909	126.46	127.694	129.211	123.069	130.365	126.991	120.772	117.276	125.995	125.406	121.059	128.069	117.879	120.739	128.41	120.001	127.967	122.62	119.427	116.392	125.315	125.311	129.105	118.884	131.813	129.918	123.144	130.852	116.159	120.942	122.321	139.517
ADAM15	221.835	251.298	263.98	264.942	238.4	285.571	225.945	246.271	164.342	152.161	278.811	413.513	286.971	289.23	303.348	289.103	251.516	317.01	279.068	331.419	315.38	330.996	307.382	266.481	275.203	385.669	401.449	250.466	207.43	358.586	342.448	436.245	315.527	380.157	282.538	278.252	283.706	425.002	367.907	331.865	496.833	489.212	605.782	352.377	200.324	342.496	277.769	345.866	287.288
ADAM17	378.44	421.514	411.955	460.081	376.583	445.856	414.872	417.584	263.535	227.012	300.999	327.224	335.963	335.059	328.847	306.095	331.867	456.029	356.99	471.195	290.556	372.637	316.054	328.338	317.507	430.237	398.701	215.184	261	442.401	267.299	363.121	388.699	414.063	295.931	267.762	312.961	270.213	229.448	413.101	383.844	349.419	429.866	397.438	496.027	336.689	519.934	518.097	315.531
ADAM18	114.704	116.053	118.605	112.694	120.139	113.565	115.181	116.804	115.066	115.217	110.29	108.962	121.699	120.554	119.333	120.163	119.675	120.029	115.23	116.162	114.298	115.698	115.185	131.61	127.272	121.072	112.683	108.454	116.114	118.734	115.959	117.679	125.92	110.042	113.854	120.482	114.293	109.047	126.084	120.005	111.927	116.853	113.501	122.452	112.388	124.214	118.93	119.788	116.37
ADAM19	120.588	117.329	119.783	119.805	118.618	123.626	113.857	128.505	121.956	124.86	115.675	112.931	134.795	122.16	130.109	122.139	121.609	125.821	116.203	127.846	118.026	123.234	122.114	120.031	116.801	118.673	123.113	115.682	127.783	134.656	118.634	120.27	122.717	121.049	128.878	121.444	122.023	126.175	124.188	123.755	111.746	119.628	122.273	117.974	125.53	119.2	123.659	123.331	131.086
ADAM2	128.086	145.617	138.252	139.295	143.979	138.853	141.66	145.021	135.163	133.667	124.95	133.937	151.307	133.307	138.763	132.996	130.043	140.524	133.73	134.285	130.043	130.523	138.015	132.159	136.009	141.16	159.67	125.079	133.824	130.601	126.802	129.163	126.368	126.446	132.253	124.342	135.738	126.965	134.053	138.369	135.728	137.939	141.923	136.744	132.1	135.329	126.937	147.368	124.788
ADAM20	105.755	108.87	109.336	110.093	110.862	107.885	114.011	111.068	115.616	106.482	116.145	109.462	113.655	113.554	108.027	111.112	117.426	114.426	103.592	111.064	112.418	111.376	122.263	108.194	109.132	114.237	105.335	113.075	119.644	114.615	117.449	121.897	119.188	113.578	115.581	118.951	112.806	107.974	107.626	112.949	113.584	112.927	120.239	114.762	106.525	107.283	115.591	112.352	108.441
ADAM21	117.962	112.957	118.092	116.593	125.005	118.519	118.393	127.051	115.63	121.966	130.04	118.295	116.821	113.332	125.557	115.541	109.225	115.778	126.663	115.29	111.711	123.766	116.162	120.421	120.914	126.016	119.945	130.504	115.937	125.014	117.848	116.724	116.141	116.962	115.468	119.502	119.513	114.09	112.246	117.595	123.815	119.136	126.932	122.953	124.208	116.516	127.284	122.434	112.527
ADAM21P	125.1	122.856	126.585	121.94	128.769	117.181	115.607	117.581	128.026	122.602	114.787	121.87	114.109	120.752	116.214	116.1	129.286	126.228	109.974	125.159	118.561	112.835	117.3	129.07	123.441	116.548	112.881	111.12	121.95	112.393	124.186	117.804	122.753	113.671	118.328	125.396	124.756	122.776	129.455	117.294	114.565	113.698	119.905	118.434	126.205	114.133	115.394	111.247	110.15
ADAM22	124.275	116.871	115.467	117.037	118.251	113.889	117.423	117.196	121.254	120.935	117.119	120.599	125.119	125.217	118.93	118.269	119.79	118.45	115.747	120.146	119.239	118.356	124.001	118.067	127.188	113.236	111.521	116.992	122.861	121.083	118.99	113.507	115.691	113.414	119.259	117.39	115.854	116.983	113.421	117.019	116.682	111.135	118.884	113.073	124.026	118.737	122.478	117.061	121.966
ADAM23	121.097	125.163	135.631	116.011	129.192	118.56	130.719	133.593	117.687	116.527	123.096	145.08	122.038	125.132	128.422	112.672	119.389	117.468	119.3	124.406	117.146	121.268	126.051	115.877	116.888	119.863	116.611	117.809	117.518	110.679	131.914	131.79	118.157	115.713	125.437	111.342	129.166	119.724	111.486	124.069	116.605	112.108	111.911	120.875	114.063	124.613	124.902	126.822	115.733
ADAM28	143.074	133.461	136.248	146.097	136.978	133.797	141.091	126.769	179.061	145.329	154.473	136.818	147.321	157.83	171.306	143.729	136.124	130.627	153.282	183.708	133.614	151.286	135.548	134.707	157.584	136.812	129.089	140.68	146.667	141.731	200.906	171.053	246.586	158.637	180.74	228.825	162.947	148.761	166.326	195.218	128.524	127.361	120.256	198.144	120.465	191.432	166.487	166.058	140.689
ADAM29	133.685	136.25	124.547	129.535	126.831	131.535	127.005	132.14	120.349	135.475	119.746	127.662	114.559	127.414	132.619	127.782	122.552	120.407	130.841	133.752	118.571	125.037	132.681	116.147	135.838	141.875	139.572	115.265	123.617	131.865	129.918	128.573	122.67	126.397	121.274	125.048	119.039	128.749	126.629	123.575	134.147	130.511	139.759	130.561	114.476	124.906	121.419	115.409	129.024
ADAM30	122.538	122.688	118.667	118.063	120.51	122.345	121.224	120.871	117.773	119.823	122.834	117.034	116.863	116.714	120.826	124.932	113.622	126.906	119.857	112.461	113.25	128.794	114.666	117.226	124.608	120.041	121.022	116.571	127.152	117.694	124.496	118.756	113.913	112.402	116.563	117.492	121.045	120.433	117.388	119.486	124.284	111.04	129.795	122.267	147.152	128.48	118.57	110.157	110.447
ADAM32	122.274	131.256	124.813	121.919	118.518	118.861	121.854	120.884	124.497	122.761	121.736	128.115	127.36	126.775	125.055	124.158	131.665	122.495	121.924	125.048	122.974	124.148	126.314	125.013	122.415	126.263	122.741	118.832	130.64	122.142	117.618	124.948	122.261	122.605	118.226	125.144	125.82	120.332	124.545	122.621	123.994	125.875	125.366	121.637	121.764	119.91	124.831	120.526	116.876
ADAM33	123.934	122.932	116.116	132.429	126.417	124.118	125.445	127.261	123.786	123.972	122.111	123.238	127.484	127.218	116.518	122.994	118.276	126.972	129.525	124.148	128.861	123.793	128.896	124.829	124.522	128.534	134.362	129.943	119.817	124.93	123.484	137.643	121.346	127.239	127.947	123.723	120.952	125.882	121.25	122.18	122.686	122.583	124.209	125.914	121.756	126.692	130.99	124.562	116.834
ADAM3A	112.418	118.162	117.815	122.67	117.254	115.29	122.935	116.657	116.014	122.62	120.993	114.285	115.261	118.586	114.417	116.683	117.946	119.209	117.71	117.922	119.783	114.629	116.33	119.392	115.954	116.168	117.587	119.465	111.783	124.69	135.349	119.368	118.249	119.2	119.044	116.403	117.417	123.016	113.539	125.871	119.854	117.108	124.049	121.019	122.869	116.57	120.766	114.43	122.482
ADAM5	116.571	124.391	116.417	114.581	118.01	116.889	123.615	118.176	118.638	112.091	115.845	120.956	117.386	117.147	111.475	124.478	116.392	123.565	116.454	117.631	124.97	119.388	125.149	116.377	124.711	118.529	115.687	118.69	118.071	116.931	117.921	121.673	111.443	115.031	115.61	117.06	119.731	117.865	117.222	117.469	120.563	115.173	116.414	111.416	119.625	124.306	119.698	126.063	125.078
ADAM5P	110.45	110.707	111.264	110.806	112.014	112.64	110.009	112.821	116.862	109.299	122.355	112.421	118.146	118.003	110.558	116.494	120.145	113.806	114.265	113.715	118.525	113.854	115.099	110.436	121.446	113.106	111.579	110.356	105.875	111.469	118.976	112.033	112.335	115.352	121.21	114.694	116.151	112.397	116.932	112.689	112.168	116.086	111.788	108.666	120.889	110.709	122.573	117.169	117.056
ADAM6	134.083	131.324	135.87	130.346	125.142	129.583	129.671	130.494	124.602	127.297	119.364	124.741	120.771	125.038	118.498	124.52	119.809	127.123	119.049	130.043	132.206	129.443	132.72	128.132	124.85	139.003	132.886	130.742	129.124	134.761	129.189	115.217	130.181	127.968	119.743	125.2	122.443	123.638	122.737	132.488	131.508	139.281	128.125	125.485	132.244	126.685	121.571	128.489	126.95
ADAM7	121.561	132.425	124.725	123.577	125.627	133.891	124.065	125.34	133.51	116.454	120.671	121.888	131.327	125.323	121.244	131.944	125.316	133.082	121.126	126.478	123.838	124.317	122.398	116.464	126.068	123.431	134.083	132.253	126.851	126.63	122.137	115.443	120.289	128.679	118.084	120.17	126.758	102.997	119.824	111.441	144.068	121.446	127.394	127.263	124.567	114.947	111.404	129.103	122.371
ADAM8	542.579	492.112	494.656	517.268	497.125	719.359	580.891	609.478	1010.7	645.675	794.532	1012.99	1033.79	713.926	681.763	967.515	886.316	961.987	976.69	825.611	776.73	798.293	572.653	825.611	650.615	564.643	422.429	1347.82	909.694	581.155	527.003	668.433	601.345	623.904	584.827	715.21	459.559	514.819	723.23	819.031	828.676	605.892	891.871	725.241	175.23	706.007	1599.06	619.115	595.379
ADAM9	163.386	146.125	164.602	159.565	150.294	150.939	164.032	150.53	185.328	169.625	154.033	201.927	162.856	163.263	178.091	172.948	179.912	165.601	178.852	151.177	165.733	179.674	157.253	181.028	172.738	167.738	176.216	163.294	161.892	185.621	160.658	189.643	222.043	225.138	172.725	169.868	180.425	191.215	162.947	202.224	219.256	149.722	170.82	190.159	298.852	173.428	219.321	167.69	149.314
ADAMDEC1	129.587	120.113	125.824	125.689	131.63	127.967	123.122	122.893	145.977	127.909	118.631	127.313	133.605	131.431	135.455	133.596	123.677	124.025	129.548	128.719	128.187	121.326	125.969	120.465	131.408	136.024	133.716	131.672	150.899	120.266	136.172	136.581	138.425	132.118	130.483	134.535	161.971	137.999	127.133	133.766	122.909	130.267	126.323	139.592	253.399	126.209	143.377	128.187	131.862
ADAMTS1	186.214	147.867	123.165	141.767	190.09	186.765	144.454	203.482	140.539	177.372	161.836	126.112	139.376	153.811	147.142	176.618	183.483	151.637	123.253	136.778	136.703	123.755	137.166	130.264	125.913	123.338	129.708	117.602	153.29	133.644	125	115.397	121.939	124.84	120.019	122.199	131.13	115.01	121.167	125.31	123.668	122.429	141.804	136.409	137.28	127.548	131.072	126.863	140.56
ADAMTS10	115.779	116.743	124.416	127	118.669	114.065	124.975	132.055	127.77	114.41	122.695	114.374	113.677	150.702	118.653	131.599	118.149	114.949	129.353	126.523	118.612	119.95	117.444	121.523	120.957	116.524	126.958	112.894	118.97	115.588	126.171	115.92	116.07	130.483	120.27	119.246	121.438	116.265	124.697	117.217	121.323	118.12	122.876	127.452	127.425	118.329	119.55	120.104	148.849
ADAMTS12	112.394	113.757	112.435	120.551	119.326	116.202	117.838	120.179	117.329	119.521	115.762	113.068	112.172	125.115	107.96	115.011	106.767	112.391	119.403	117.489	115.031	114.478	117.688	117.448	106.888	112.754	120.164	110.643	116.67	118.395	108.248	104.708	112.556	115.546	108.316	120.959	118.638	119.785	105.589	122.587	112.045	117.8	114.487	108.954	126.567	124.771	116.258	118.124	115.443
ADAMTS13	110.796	112.901	120.34	118.43	119.794	118.768	119.138	117.077	120.299	117.56	114.904	122.061	121.685	116.658	118.158	119.536	119.137	111.133	126.502	116.709	121.367	115.022	132.109	123.401	123.993	113.922	125.939	124.606	122.462	121.579	120.982	112.043	119.898	117.72	113.076	116.593	121.186	126.873	116.839	128.99	118.338	115.729	120.05	118.494	123.3	118.684	108.927	114.794	119.36
ADAMTS14	117.268	117.48	121.567	119.017	116.433	118.871	112.219	119.646	115.469	119.265	111.338	122.088	115.516	121.164	111.921	115.427	117.994	125.67	116.014	119.979	122.486	121.482	116.723	124.342	109.017	113.825	125.03	120.255	114.913	121.875	116.493	114.174	118.061	115.979	119.813	117.332	120.149	115.873	116.237	117.041	116.175	109.423	117.387	114.362	120.331	114.699	121.746	119.839	113.628
ADAMTS15	134.816	134.846	147.736	143.042	124.445	146.523	147.269	148.705	130.862	130.098	141.927	122.466	127.78	128.075	128.879	129.593	127.714	131.705	137.42	137.288	148.281	131.444	123.658	141.457	135.709	141.572	147.593	126.532	128.327	129.914	128.469	115.906	126.745	146.363	121.653	129.263	126.957	126.08	122.388	136.268	147.588	155.707	146.554	125.846	125.536	117.949	134.614	136.009	142.879
ADAMTS16	117.904	120.281	120.955	116.962	126.714	120.352	120.754	130.565	114.212	121.924	119.519	123.557	114.873	117.921	116.37	141.952	126.422	123.99	114.249	116.991	119.406	118.903	129.785	124.475	122.47	121.739	124.534	112.192	124.018	118.306	112.492	126.147	119.041	117.527	115.3	119.748	115.173	113.903	109.501	111.385	124.811	116.048	118.693	116.351	115.971	109.531	129.409	122.71	132.72
ADAMTS17	132.363	141.753	136.212	129.772	129.548	115.786	125.054	126.71	130.948	132.593	125.795	130.222	131.511	125.143	130.509	134.889	125.967	131.797	115.992	127.187	140.363	126.741	122.283	136.482	133.114	131.168	127.141	131.038	129.733	137.648	131.608	123.063	132.773	127.629	133.977	126.156	125.434	131.349	127.554	131.891	129.807	145.175	133.932	129.271	127.623	122.612	127.937	116.941	123.206
ADAMTS18	118.028	117.96	119.817	122.971	117.995	125.154	119.881	116.783	125.765	114.394	115.454	124.4	120.055	126.725	116.535	119.317	121.427	123.233	112.68	124.629	119.392	130.469	119.658	114.33	123.528	121.386	126.985	119.881	121.55	117.713	113.98	119.71	121.786	118.346	121.421	117.452	117.833	117.143	118.904	116.228	119.75	121.478	119.739	117.864	133.956	115.835	121.794	120.956	123.256
ADAMTS19	107.054	114.105	111.806	123.006	114.687	114.461	118.755	114.597	115.537	114.49	129.914	118.26	109.897	115.755	111.056	120.073	119.686	116.006	113.522	117.507	110.478	110.756	117.382	114.783	119.848	112.807	109.037	120.445	121.866	126.374	108.606	113.627	120.521	122.375	109.615	120.851	107.064	107.145	118.947	119.755	107.165	112.065	112.967	115.331	116.528	110.323	118.04	119.364	117.39
ADAMTS2	117.413	120.052	121.312	116.846	121.454	116.749	119.275	120.019	121.848	122.335	122.02	127.393	124.578	119.994	118.927	121.162	117.881	119.916	121.466	121.709	121.481	122.23	121.366	123.348	123.618	187.802	206.308	122.661	120.092	178.189	134.541	172.714	157.708	117.836	131.28	135.373	181.817	284.45	124.261	210.208	119.905	146.351	245.742	147.626	124.606	169.024	139.962	126.333	119.317
ADAMTS20	115.504	113.595	117.39	119.535	115.871	115.003	120.248	122.666	119.385	117.683	116.514	116.126	116.153	119.894	119.703	118.723	120.821	118.443	116.321	114.2	116.927	117.22	117.925	129.666	118.987	117.406	118.954	117.982	115.999	113.577	122.234	122.062	123.865	116.11	118.201	122.108	124.263	120.831	116.613	123.204	118.444	117.181	114.502	116.894	130.536	123.16	114.382	116.318	114.585
ADAMTS3	118.652	120.689	122.446	119.751	124.418	120.237	119.408	126.747	128.415	115.753	118.581	127.312	115.101	119.584	124.162	127.479	129.068	123.852	117.994	115.036	116.531	134.325	115.361	114.125	125.278	122.709	122.963	122.026	117.624	112.535	118.462	113.922	135.351	117.816	123.302	123.031	115.538	114.49	118.721	115.236	125.937	130.348	126.393	117.418	135.248	123.892	127.853	123.013	175.462
ADAMTS4	124.124	126.945	126.936	130.007	122.327	134.581	132.795	140.217	123.175	129.814	123.57	126.097	121.06	129.202	125.801	127.009	127.613	132.638	122.659	129.157	128.675	117.828	147.395	144.181	132.394	156.339	151.661	127.606	151.185	154.626	131.285	129.702	122.591	121.384	123.833	132.549	119.43	124.64	130.425	123.853	132.034	162.176	267.794	124.647	309.737	119.483	147.482	139.04	126.279
ADAMTS5	121.282	117.085	118.2	113.554	124.762	118.575	116.155	113.625	128.101	116.052	126.996	119.34	123.944	130.012	130.041	126.246	130.911	114.343	123.342	119.61	119.187	121.645	118.021	121.284	116.148	117.885	115.584	152.742	118.552	118.574	121.681	115.662	125.153	113.775	127.094	117.144	113.846	121.359	119.865	133.385	112.157	112.825	115.358	137.656	120.904	129.563	126.601	132.784	122.544
ADAMTS6	143.151	143.815	151.321	143.742	131.782	131.737	154.056	139.992	168.685	200.315	148.182	127.346	134.962	144.864	136.791	130.02	130.772	132.306	143.616	131.992	135.01	131.229	145.107	131.182	153.149	134.171	137.709	134.582	150.068	134.756	135.413	149.192	155.445	128.797	142.953	146.99	143.991	150.578	138.925	149.889	138.504	132.669	133.455	157.822	129.844	138.685	154.178	135.586	133.529
ADAMTS7	116.202	115.455	116.944	119.617	113.157	122.565	120.029	117.913	120.815	124.755	118.625	124.596	131.768	121.901	118.117	118.02	118.499	124.047	126.135	124.406	115.541	120.179	114.803	133.577	112.465	121.343	118.859	114.833	121.183	116.387	121.723	120.002	114.912	118.071	122.184	121.605	123.693	117.448	118.294	127.521	122.462	117.205	121.343	120.356	123.423	120.094	111.602	118.595	120.426
ADAMTS8	134.529	136.466	140.635	129.38	130.26	135.333	133.314	123.535	136.834	130.841	126.722	125.188	135.769	134.668	122.723	129.519	118.564	127.264	124.621	128.866	128.377	124.374	123.584	125.195	124.357	133.783	130.208	119.305	127.218	127.341	134.387	126.776	121.49	111.836	130.508	120.293	128.757	122.363	125.03	129.872	132.885	132.826	158.19	126.707	123.806	125.876	126.574	114.353	125.866
ADAMTS9	117.155	114.818	111.131	109.528	106.264	114.366	115.66	118.42	119.373	116.006	117.314	108.07	118.177	117.932	117.291	116.201	114.596	116.352	110.527	112.662	112.021	109.158	110.653	120.491	111.014	117.29	119.621	129.244	117.645	107.437	113.728	117.325	112.474	117.289	125.467	110.811	115.273	119.81	116.118	115.011	111.724	112.966	118.707	106.841	114.011	114.537	115.792	122.583	111.532
ADAMTSL1	117.85	120.346	116.913	115.827	115.699	120.053	118.725	121.039	117.859	121.305	120.732	121.167	117.481	119.905	121.548	115.878	118.177	114.314	114.205	118.207	119.225	123.999	119.335	116.842	120.168	117.376	115.605	113.141	122.412	112.385	122.961	113.73	123.59	117.867	118.451	119.407	116.247	120.833	116.728	119.488	114.254	115.187	113.861	118.169	124.982	117.43	118.106	116.396	121.345
ADAMTSL2	121.107	121.057	124.06	121.46	116.044	120.863	118.749	123.45	115.35	110.93	126.575	122.904	121.216	127.874	119.019	121.91	121.235	118.49	123.132	129.867	133.116	130.69	121.05	114.873	126.596	129.727	116.413	114.582	116.885	118.443	115.225	129.132	120.341	116.722	127.835	120.296	113.709	112.855	118.967	118.561	125.692	118.095	115.804	125.058	111.806	122.989	115.969	126.998	113.209
ADAMTSL3	126.819	130.417	123.594	127.019	131.119	128.206	132.151	130.008	145.44	138.917	120.708	132.483	125.59	119.751	120.768	129.944	138.989	123.314	126.5	123.712	134.402	124.287	136.406	121.763	125.946	134.96	136.624	142.195	133.73	127.274	112.548	128.057	124.998	119.394	132.55	131.505	131.724	123.436	124.781	126.602	132.76	126.769	128.882	127.267	158.857	120.209	141.018	139.306	225.715
ADAMTSL4	151.111	130.994	149.431	159.115	153.412	148.42	152.763	156.765	167.5	155.232	145.788	190.109	183.4	165.315	161.65	153.769	161.441	206.272	166.905	142.703	138.056	167.936	140.073	152.797	155.225	213.511	183.042	174.979	171.246	170.604	141.64	194.623	165.145	176.436	175.309	152.889	167.567	165.383	131.297	153.938	143.759	224.218	226.875	160.598	173.707	164.157	185.576	149.747	148.003
ADAMTSL5	146.017	146.725	152.913	145.1	139.766	172.477	160.016	143.216	137.196	130.395	130.559	149.243	137.95	135.531	137.263	142.498	132.381	141.421	128.72	143.025	150.482	138.265	142.914	135.853	133.383	171.134	155.316	131.728	128.969	128.021	139.403	144.972	141.79	145.991	139.88	141.431	144.797	131.174	140.846	126.537	152.13	165.654	144.566	143.582	140.389	139.948	136.11	147.547	130.465
ADAP1	185.356	235.612	200.09	226.526	178.091	237.478	205.38	194.9	174.5	144.347	272.414	294.093	236.841	276.827	310.301	228.51	262.06	330.088	303.144	299.719	232.301	304.801	219.014	278.429	258.892	235.698	252.974	368.047	296.944	233.628	272.654	377.928	249.387	244.715	217.959	287.836	242.481	395.79	251.202	259.884	265.594	323.596	364.458	266.665	114.304	288.043	257.845	213.383	193.964
ADAP2	913.774	781.187	1074.42	1015.26	788.593	1232.2	702.403	897.119	631.031	526.004	716.68	781.578	890.639	731.033	1020.04	888.911	817.793	1133.27	1041.59	574.316	789.231	734.139	843.71	966.191	825.362	1916.52	1711.54	905.891	938.961	1639.27	558.609	1370.1	1236.07	919.75	823.782	991.192	1092.66	937.461	841.613	1138.73	1400.28	1703.2	2730.78	784.405	1866.22	1046.46	1396.97	1169.54	1255.21
ADAR	1372.42	1588.46	1332.91	1550.03	1272.27	1550.8	1697.13	1439.69	1157.91	1196.45	1444.41	1355.01	1912.21	1517.45	1821.82	1809.2	1834.99	2371.34	1804.24	2085.15	1345.67	1513.53	1379.66	1898.86	1609.92	1398.59	1562.13	2873.02	3494.23	1385.14	1663.69	2311.47	2351.1	1352.7	1906.86	2396.26	1243.05	1401.34	1706.73	1008.25	2410.7	1992.98	1276.95	1742.76	188.628	1882.16	2530.9	1387.77	2467.55
ADARB1	229.326	257.873	218.188	219.532	234.664	263.157	224.416	215.825	155.831	163.282	217.25	200.624	203.306	225.022	266.054	207.16	222.833	218.824	242.22	242.479	211.114	194.862	207.485	190.613	222.238	255.74	206.002	149.219	151.898	212.885	215.197	246.927	236.028	242.979	192.722	206.121	170.67	182.707	202.615	217.161	177.028	205.648	194.419	192.666	126.766	202.905	242.742	257.29	172.38
ADARB2	137.625	117.069	126.129	121.916	137.547	126.406	159.467	145.334	133.765	135.937	142.741	126.648	117.318	122.593	124.151	133.75	117.942	144.104	119.251	120.489	132.428	123.561	129.623	132.574	125.336	135.505	129.879	126.008	134.223	125.438	131.572	119.09	131.787	129.714	116.815	128.116	129.035	132.37	118.08	141.314	121.859	128.668	123.533	129.135	168.878	136.302	137.114	132.358	122.491
ADAT1	643.532	573.383	594.975	441.673	458.12	485.797	445.929	475.393	341.634	262.272	420.573	505.196	440.368	489.611	423.652	437.004	523.859	444.354	353.558	517.798	437.389	444.957	455.426	333.33	403.235	384.225	383.551	276.208	438.009	512.14	508.02	447.469	409.45	437.004	484.282	422.734	431.318	367.436	364.845	430.19	386.329	420.805	345.003	392.494	115.324	411.524	382.593	487.115	495.425
ADAT2	155.596	135.099	158.285	157.51	146.476	139.3	145.043	137.244	175.857	223.859	174.381	161.923	145.025	147.079	152.518	149.584	139.835	159.115	140.469	128.048	142.518	139.644	139.397	159.175	148.35	135.037	139.423	158.341	147.527	151.3	149.982	143.822	140.769	147.106	152.503	143.193	141.332	161.8	142.69	146.085	128.316	125.504	128.784	154.789	133.527	160.083	144.161	149.453	136.668
ADAT3	142.091	152.109	149.684	149.534	153.96	158.867	155.936	155.776	143.871	145.053	188.176	163.821	156.141	166.193	169.6	167.599	147.68	175.667	156.547	163.645	177.402	170.099	149.908	156.221	161.209	142.808	144.386	196.042	172.354	176.089	189.355	197.742	147.556	149.562	159.084	163.174	147.979	162.192	156.564	146.662	190.398	187.196	216.409	147.867	129.278	181.014	161.952	162.748	131.541
ADC	138.393	141.314	145.365	134.487	149.834	140.441	175.293	133.866	135.001	154.82	152.06	146.985	144.527	138.231	137.45	141.564	140.719	132.005	135.277	138.66	138.635	132.323	148.256	133.478	123.121	126.728	115.546	125.083	128.418	126.854	130.537	127.901	146.366	124.044	126.001	130.375	126.906	126.755	132.818	120.471	129.14	146.633	123.609	131.752	118.763	137.179	129.146	136.632	113.047
ADCK1	201.927	231.19	216.712	235.58	201.61	201.547	198.527	215.458	272.761	354.371	250.143	247.749	220.518	223.126	254.841	228.797	221.718	272.016	270.025	285.416	201.87	270.901	204.176	244.544	215.687	223.551	251.784	239.509	253.157	224.084	236.187	286.279	218.793	238.009	240.379	240.379	196.946	228.56	233.365	214.825	263.209	232	242.369	226.956	160.083	249.065	222.939	229.1	189.214
ADCK2	825.826	802.923	790.426	723.468	699.609	635.322	763.042	680.067	410.984	426.362	578.24	446.34	452.32	542.018	511.589	459.026	478.386	582.381	487.65	680.851	636.239	609.09	648.659	520.011	589.791	802.67	689.554	389.756	443.363	559.079	455.426	482.939	426.113	461.924	457.108	648.659	529.605	498.609	536.134	429.943	653.081	1095.36	1030.61	362.329	324.358	498.208	451.925	673.168	457.784
ADCK4	209.075	230.927	217.077	203.446	222.864	216.335	196.435	220.172	328.113	278.542	242.777	306.435	278.983	229.885	264.756	198.919	190.23	238.801	224.818	277.513	266.087	294.624	265.026	260.235	224.87	272.255	239.862	301.279	237.367	238.718	243.401	259.442	230.838	213.172	215.881	222.02	236.066	290.988	242.567	198.761	281.951	350.269	447.531	180.219	110.926	288.86	251.076	227.233	173.124
ADCK5	189.372	184.766	204.226	186.744	204.655	189.937	203.388	204.973	167.333	140.14	204.894	203.145	185.263	173.139	206.648	180.155	175.109	208.381	175.323	208.448	212.759	206.756	183.346	195.39	173.124	202.898	226.119	189.998	196.387	196.127	219.232	239.058	170.391	202.274	195.056	183.328	184.69	192.615	168.773	177.183	177.596	212.759	228.825	190.663	130.886	199.972	188.24	161.566	135.483
ADCY1	120.513	115.795	115.068	121.379	116.967	112.649	116.98	116.415	119.447	113.189	121.287	116.311	128.553	118.042	122.733	125.323	118.652	123.849	122.972	123.7	117.365	121.329	120.088	112.26	117.206	119.856	114.912	115.434	114.254	119.933	121.529	117.147	118.684	114.119	112.053	122.784	119.037	119.447	121.68	120.476	117.485	111.445	122.075	119.609	116.538	115.105	116.109	117.634	132.523
ADCY10	115.003	121.222	120.011	120.697	117.582	116.584	128.265	116.725	120.479	131.47	134.239	118.929	126.827	119.25	132.401	116.698	126.246	126.771	132.662	113.687	116.335	116.51	119.119	112.635	121.426	116.634	114.85	115.001	120.487	119.877	118.384	115.945	118.362	124.707	131.912	115.638	120.016	115.63	115.932	128.07	123.296	129.234	118.943	129.34	122.656	117.26	120.358	123.631	123.09
ADCY2	127.658	124.71	118.841	118.34	123.556	120.322	119.329	122.783	124.332	140.329	119.579	117.508	122.07	115.034	124.42	121.573	123.122	122.353	123.712	126.612	111.961	109.05	117.584	118.844	115.97	119.665	121.687	119.926	120.603	118.505	122.632	119.939	116.4	118.195	119.019	112.961	129.279	123.336	107.423	125.913	130.978	121.384	120.39	122.132	142.566	121.11	123.581	124.977	118.433
ADCY3	696.419	752.37	853.165	758.711	718.648	489.929	656.663	529.032	692.303	923.634	673.637	721.754	675.87	672.701	780.777	660.299	584.013	735.114	891.614	469.772	731.361	659.17	696.419	615.562	591.211	661.214	918.694	967.515	469.027	926.511	786.409	646.837	560.501	898.668	689.231	749.535	866.802	582.635	876.706	851.602	1137.1	900.213	1330.75	842.558	1760.25	534.573	681.606	855.719	617.839
ADCY4	167.5	173.627	187.908	185.263	173.258	187.003	181.802	173.258	196.353	191.838	181.421	237.303	231.942	191.875	208.623	172.007	177.654	205.38	193.723	174.681	156.15	187.621	189.252	197.871	168.647	188.159	188.554	268.07	207.583	234.88	216.387	183.595	189.566	204.695	169.168	174.845	165.491	137.366	159.629	196.315	279.457	186.799	196.555	176.589	259.651	181.533	257.736	173.891	148.271
ADCY5	127.233	119.481	127.118	119.843	119.529	121.977	123.091	121.957	119.615	122.343	133.42	121.734	128.096	120.992	117.946	118.349	122.626	128.517	125.914	122.734	125.314	121.919	123.014	115.597	116.105	117.553	120.125	128.895	118.606	131.393	110.126	127.141	117.856	117.532	125.493	120.566	117.262	120.035	121.236	123.713	125.688	125.824	130.758	125.655	119.562	131.416	118.406	122.544	123.235
ADCY6	131.486	126.154	130.357	127.653	127.887	126.496	126.454	125.412	131.257	124.698	139.108	131.151	127.13	122.954	125.955	126.806	122.727	133.129	128.542	123.415	120.069	128.098	125.334	132.483	126.218	130.703	127.95	128.392	126.561	124.443	123.477	129.074	130.369	119.401	131.149	129.457	131.337	127.551	129.025	127.473	128.534	126.618	138.216	130.263	126.096	132.305	115.75	131.436	123.371
ADCY7	966.191	800.058	932.131	888.697	901.536	945.595	878.509	964.362	609.478	467.614	997.854	845.199	1182.81	1063.99	1390.08	1449.29	1713.32	1432.73	1099.39	843.249	914.294	924.734	800.7	1306.17	990.868	755.684	717.959	1040.91	1562.13	1098.69	612.322	938.688	1295.53	1312.65	1386.8	1172.13	929.626	464.497	538.803	739.069	725.719	714.893	795.581	1162.55	183.102	1004.4	1046.46	927.092	1305.74
ADCY8	129.981	125.545	125.544	125.368	125.393	123.333	128.245	130.469	110.25	124.515	122.698	113.946	123.029	126.292	123.066	119.114	117.855	126.329	123.52	122.103	126.629	125.113	129.37	130.013	123.524	131.467	127.984	128.747	132.482	126.895	126.037	120.742	113.789	120.89	123.116	118.701	120.99	124.886	121.583	117.257	131.938	125.641	128.828	126.136	133.852	127.591	136.135	124.26	117.476
ADCY9	208.778	208.753	174.381	167.855	187.593	189.073	202.647	172.34	255.189	220.781	249.387	192.097	200.656	214.057	200.679	220.86	195.692	216.028	222.117	229.937	201.744	235.58	223.358	239.312	203.568	162.437	177.336	215.761	215.709	152.19	178.866	201.783	172.535	186.472	185.919	172.415	172.535	207.284	188.712	178.826	138.1	183.964	212.504	189.437	118.491	207.184	127.073	193.271	146.917
ADCYAP1	113.613	111.899	110.881	111.376	112.648	110.72	111.866	109.351	115.581	115.366	114.656	114.645	118.644	126.303	111.361	111.211	116.862	111.698	114.345	115.452	111.939	117.324	113.583	106.312	121.126	111.541	110.343	114.859	113.049	115.651	116.48	112.352	109.855	107.174	112.083	112.832	114.37	117.223	107.524	112.847	114.295	115.329	112.956	106.793	110.209	115.187	108.54	112.296	108.997
ADCYAP1R1	110.333	114.318	109.666	115.31	112.974	113.704	116.003	114.003	127.399	118.824	115.077	117.799	115.528	120.978	114.039	108.733	117.077	118.939	119.139	113.296	114.917	112.062	114.082	115.584	120.572	114.035	111.323	118.435	114.917	124.106	124.089	109.666	116.65	124.351	113.893	116.146	109.403	114.862	116.756	114.826	114.179	117.632	111.884	116.633	131.699	126.609	122.21	119.806	116.6
ADD1	3734.86	3012.38	2720.71	2509.29	2422.6	2006.44	2596.03	1863.03	2480.84	2571.37	2684.76	2372.56	2469.02	2564.12	2465.66	2698.84	2909.89	2263.61	2946.36	1800.25	2132.11	2336.71	2249.99	2030.8	2331.6	2325.95	2127.62	1974.18	1723.71	2054.25	2936.16	2446.67	1965.54	2534.63	2615.98	2406.27	2413.27	2622.39	2158.83	1983.06	2149.46	1909.2	1785.01	2526.52	5313.52	2263.55	2121.22	2237.51	2556.02
ADD2	116.653	114.157	117.04	117.407	115.511	116.39	119.068	117.413	115.524	115.175	116.332	116.726	114.304	109.616	118.11	119.057	116.657	111.736	119.11	120.383	123.054	120.026	119.384	116.683	119.256	117.907	116.156	116.996	117.977	118.618	121.769	117.008	117.644	121.76	118.926	122.874	119.121	114.961	119.007	113.696	118.262	114.763	115.099	111.766	130.312	117.395	116.91	113.622	114.248
ADD3	1752.36	1501.24	1407.18	1548.66	1674.16	962.578	1427.1	1436.37	1739.8	2302.17	1900.6	1431.1	1783.06	1856.96	1874.69	1747.68	2240.32	1448.38	1913.21	1028.44	1265.07	1229.3	1830.47	1390.48	1496.55	940.333	798.966	1307.68	871.898	986.937	1715.86	1373	2008.26	2584.9	2156.63	1982.68	2086.94	1019.48	1601.85	1754.08	755.045	713.006	499.098	1929.52	457.72	1523.81	1012.25	1215.22	1782.9
ADH1A	127.633	119.371	118.137	127.281	126.881	118.145	123.806	117.653	124.425	132.038	127.758	118.979	132.814	138.028	122.945	134.147	118.56	127.005	119.675	120.353	127.985	124.723	119.305	116.615	126.278	121.472	124.332	121.281	129.156	129.357	123.699	132.431	116.241	130.375	125.42	120.699	121.12	124.691	137.599	132.294	125.657	125.682	130.707	121.402	124.494	128.341	124.26	118.381	119.936
ADH1B	118.612	120.386	124.88	113.651	116.911	119.397	119.463	116.526	115.381	127.045	124.077	123.77	116.388	110.087	113.446	112.327	118.555	119.119	117.799	121.703	109.91	119.126	119.926	115.826	115.117	119.232	118.692	108.711	125.149	120.452	119.914	110.295	115.234	108.976	103.675	115.857	120.424	115.171	119.019	121.355	120.451	120.112	117.907	112.439	122.697	117.969	117.374	116.552	130.193
ADH1C	132.934	125.186	117.686	115.299	116.493	118.34	121.48	128.565	113.732	112.879	127.987	118.944	126.898	118.148	118.84	111.597	122.436	119.597	110.777	127.198	123.466	115.278	123.139	115.261	118.441	112.707	112.374	116.79	118.946	123.397	119.485	120.503	113.597	116.716	117.721	112.331	118.137	119.394	117.222	120.103	119.901	118.098	115.379	111.802	120.335	111.475	116.688	120.495	124.651
ADH4	115.947	126.296	116.52	117.399	120.875	122.274	120.758	122.438	136.157	146.473	131.535	127.875	124.245	124.681	121.666	124.521	129.815	126.768	129.316	117.895	126.054	121.036	127.725	127.29	126.752	114.056	124.439	131.066	138.167	126.917	134.93	121.606	125.058	133.386	130.749	124.074	122.554	127.652	120.802	116.947	116.04	119.423	114.802	126.993	186.758	125.014	132.541	143.93	124.956
ADH5	239.145	235.179	209.075	217.031	253.225	204.655	240.796	205.011	188.587	208.823	177.696	173.078	193.013	179.526	197.979	188.03	201.964	171.388	184.042	193.089	172.178	175.353	194.405	199.933	196.964	210.482	183.181	187.771	199.806	157.792	168.635	162.437	191.185	215.477	201.902	219.464	211.531	181.014	174.422	183.042	177.507	191.749	210.389	193.663	134.709	196.353	166.475	170.82	194.008
ADH6	130.262	132.192	130.041	135.67	127.331	129.324	132.326	153.393	119.079	134.341	120.976	135.123	126.501	135.664	134.097	136.64	128.707	129.294	128.002	135.386	135.386	127.489	142.658	132.165	134.47	145.306	128.769	117.639	123.021	130.973	130.157	125.763	123.699	131.594	126.543	131.518	129.562	115.001	132.88	130.226	123.759	126.946	132.476	133.087	123.322	139.472	134.862	124.127	127.773
ADH7	126.264	126.572	130.5	121.756	120.789	124.225	119.566	128.425	120.618	121.949	137.617	127.836	131.011	114.179	129.006	120.634	133.571	121.494	133.866	125.485	119.871	114.556	132.116	125.547	130.429	120.06	118.758	120.113	121.561	117.604	119.004	128.587	128.658	114.709	130.383	122.857	121.73	125.972	128.601	123.611	122.51	122.231	125.177	124.852	138.003	124.514	123.882	123.267	129.402
ADHFE1	515.418	324.598	399.103	401.374	387.498	428.12	485.474	386.409	551.571	626.153	607.012	428.112	644.923	511.637	510.117	604.57	588.397	549.708	528.532	460.012	514.577	463.395	536.267	573.395	475.523	332.597	239.668	438.192	294.421	366.554	412.09	340.763	411.281	657.428	426.769	366.387	424.282	345.971	391.841	445.986	298.201	294.678	239.099	336.475	396.814	375.175	235.215	362.09	294.577
ADI1	141.242	165.785	141.657	181.952	185.037	176.96	169.076	179.731	334.67	281.913	171.193	278.698	217.007	188.691	223.504	251.139	253.197	289.163	209.604	206.297	235.556	272.887	216.689	294.533	321.844	164.741	159.026	239.002	225.291	230.376	238.801	264.825	292.697	256.363	197.605	220.737	332.206	403.737	372.98	317.531	141.504	150.893	152.729	313.857	508.02	252.189	196.005	240.999	167.678
ADIG	116.434	111.634	110.105	108.18	110.3	111.133	113.539	115.324	113.095	109.165	115.741	113.9	114.684	111.12	120.019	113.984	114.189	113.674	119.508	107.751	115.505	116.513	107.414	109.041	115.45	115.189	117.04	116.667	113.039	112.446	118.022	113.803	120.909	115.927	111.321	108.327	114.118	112.992	117.236	112.223	113.319	114.783	110.337	107.9	109.71	112.513	118.264	121.244	113.327
ADIPOQ	123.431	128.07	122.876	128.091	126.028	125.686	119.119	131.03	121.554	125.27	130.209	122.169	128.662	133.549	127.077	137.478	129.024	130.724	126.331	126.219	123.698	126.242	126.332	124.511	137.196	124.337	123.996	126.913	148.548	131.042	121.058	132.786	119.892	122.276	121.957	122.322	123.983	130.195	131.205	115.602	121.852	121.966	130.766	120.397	119.819	120.347	123.91	142.767	119.606
ADIPOR1	635.127	803.859	814.088	850.313	772.918	734.233	726.208	795.12	1383.97	1533.82	993.169	1471.51	1075.88	1256.48	1085.46	880.992	973.882	1171.5	1078.01	1472.9	1141.03	1172.44	1109.7	1123.73	1188.65	937.639	1040.61	1217.51	1705.95	1112.24	734.801	974.686	1473.49	820.678	1304.44	1004.36	970.824	5323.06	1464.69	1968.67	3758.08	1364.19	1365.04	1234.02	351.239	971.81	1049.75	1203.96	803.796
ADIPOR2	888.521	847.128	833.066	1011.27	910.232	887.994	885.017	936.275	1021.97	1068.47	851.871	822.552	784.984	933.324	900.802	922.813	921.936	1060.38	856.267	1108.66	989.932	997.854	1186.06	1032.76	948.685	917.146	926.809	760.918	943.961	1026.51	904.639	871.642	919.984	880.668	856.467	919.204	762.652	700.696	999.383	894.135	994.495	896.838	847.675	903.15	376.232	873.912	812.058	760.719	791.913
ADK	195.115	170.208	215.212	236.554	229.73	194.16	190.757	202.896	138.935	138.201	176.211	163.624	170.293	210.224	189.044	171.749	194.487	183.593	186.325	180.852	174.81	176.314	209.143	178.618	203.086	253.758	239.679	165.16	132.234	230.377	174.224	169.446	229.69	215.825	197.579	222.909	180.815	137.869	178.354	167.738	173.625	191.354	162.229	177.762	126.195	184.45	194.314	230.959	199.024
ADM	352.97	289.724	339.068	398.13	442.135	1707.44	600.935	1651.19	483.479	416.776	295.791	953.32	1061.42	324.471	310.691	628.146	547.62	372.464	865.599	824.969	567.725	852.918	559.519	785.98	774.526	1174.64	1467.68	1534.28	969.007	1147.69	354.837	1070.87	1522.93	592.596	464.942	874.868	2601.63	1387.23	1282.19	1884.09	3197.23	1347.82	4223.48	849.574	2423.76	544.995	5446	491.171	948.685
ADM2	144.899	150.657	171.957	164.986	142.071	139.567	170.834	163.526	133.672	138.318	146.844	148.186	143.38	143.27	138.305	139.995	143.252	137.463	141.034	140.453	158.527	157.098	136.25	144.603	128.094	164.264	153.38	125.841	136.29	147.848	157.895	142.244	131.76	160.825	151.564	162.848	140.641	131.219	153.097	150.394	163.83	164.759	154.858	145.808	272.342	151.821	158.694	147.527	136.051
ADNP	437.185	384.273	378.937	370.591	372.93	335.633	401.413	328.523	526.59	487.95	490.605	391.139	459.728	486.85	435.126	448.129	483.214	400.967	461.567	273.368	363.624	358.745	358.471	364.772	371.535	272.055	312.36	519.793	501.431	367.614	414.81	369.585	375.082	469.518	623.147	480.768	412.628	346.727	315.607	373.52	272.47	312.86	289.295	536.422	669.213	539.16	388.368	409.298	423.805
ADNP2	527.902	574.971	432.279	436.918	400.307	415.326	430.004	387.167	628.907	679.449	430.729	396.708	451.997	510.479	492.216	555.659	580.321	474.367	453.466	635.065	537.169	625.193	550.833	483.111	684.261	385.832	398.296	439.808	506.588	398.847	406.679	473.743	618.795	601.96	618.644	512.489	537.659	425.134	609.898	601.698	464.586	443.041	317.023	527.087	613.702	522.325	364.98	422.429	468.053
ADO	591.915	537.169	484.641	513.221	474.631	484.089	509.39	418.02	648.659	866.271	580.17	477.548	545.6	492.901	553.589	524.571	682.556	550.725	610.634	213.333	383.754	501.511	536.134	351.716	523.996	424.566	411.286	693.324	687.448	488.948	548.397	519.352	397.725	477.84	640.454	469.519	448.642	430.399	469.772	402.632	349.519	410.916	419.874	526.229	1648.94	603.431	379.804	548.07	880.452
ADORA1	122.406	115.593	121.525	119.612	122.981	117.26	118.528	118.619	119.37	112.296	118.714	123.785	116.923	118.633	114.184	126.717	117.386	119.603	119.114	125.539	119.011	115.563	114.264	111.868	116.902	122.871	123.042	110.933	126.279	113.245	122.646	119.134	115.687	112.844	120.684	118.144	114.008	110.181	114.507	122.206	121.196	116.957	128.631	131.816	112.806	117.029	121.661	116.555	123.487
ADORA2A	293.491	484.468	352.439	372.279	297.743	318.234	291.518	344.82	234.54	421.136	325.347	391.398	257.32	332.747	307.688	236.597	259.975	287.074	318.279	500.274	338.205	309.258	324.011	243.941	315.726	363.488	292.972	264.825	275.747	308.771	444.089	298.238	262.712	249.208	256.88	335.699	206.98	331.774	331.884	305.785	474.539	579.821	323.596	335.809	130.026	281.951	445.758	419.085	196.096
ADORA2B	155.161	165.315	187.067	211.947	201.322	180.271	147.465	214.275	198.283	223.679	176.67	196.022	206.272	187.545	179.847	184.424	171.821	166.825	196.529	163.026	196.353	167.057	182.977	188.892	164.041	167.874	209.075	238.33	205.506	163.127	145.664	158.466	283.362	164.708	185.73	186.988	214.673	251.821	187.942	218.909	230.317	199.291	342.846	232.362	496.791	154.73	274.257	173.668	150.423
ADORA3	160.661	134.297	138.044	175.996	151.817	153.005	137.542	141.313	158.757	150.423	148.756	146.076	165.063	147.468	131.907	148.024	133.003	135.294	136.054	129.798	140.586	138.251	131.963	141.812	135.516	260.394	369.057	170.055	176.686	409.955	146.539	154.739	190.424	142.18	144.86	145.02	191.214	467.71	151.252	243.842	167.169	155.248	308.458	175.889	273.138	175.208	200.867	158.652	130.368
ADPGK	988.191	992.096	1078.34	1255.21	919.521	1102.09	1124.31	1034.56	1113.91	1235.08	1057.62	1035.49	1139.1	1138	1097.42	1026.12	983.492	1282.62	1242.14	1339.27	972.824	1113.02	1139.86	1093.04	1240.77	1224.94	1126.26	1257.11	1558.06	964.052	798.105	1212.04	1349.41	908.635	970.755	1038.9	992.956	1148.55	955.372	1012.31	1238.27	970.755	1116.2	1199.95	347.426	1039.26	1147.17	1011.27	1132.92
ADPRH	205.416	192.079	205.175	216.81	198.706	234.54	185.053	215.024	151.596	157.027	166.629	207.139	171.92	175.476	185.44	188.808	168.516	182.542	168.953	190.035	171.507	201.525	211.416	208.339	184.438	254.18	223.003	223.208	207.771	222.093	186.842	203.922	205.099	181.557	194.405	196.682	236.248	194.151	168.599	169.948	261.28	285.156	340.057	167.161	129.633	249.978	198.862	203.967	232.242
ADPRHL1	115.87	119.236	120.119	111.78	122.501	129.263	117.647	116.304	128.691	119.129	123.313	125.587	124.792	124.838	121.707	115.5	131.697	125.071	114.047	125.758	131.863	124.449	124.566	119.775	127.177	116.049	117.653	121.698	140.214	123.955	122.188	121.218	116.633	119.407	113.919	122.579	116.429	118.905	116.75	123.179	118.927	116.739	114.46	130.703	123.263	118.653	117.412	124.237	125.362
ADPRHL2	615.014	659.644	678.324	555.109	664.992	595.788	655.433	619.995	298.2	346.213	470.477	389.824	421.297	449.052	558.609	471.768	476.305	564.233	385.619	452.173	419.219	429.676	563.677	462.981	527.601	587.735	542.703	580.547	571.244	516.46	437.933	510.157	389.631	445.929	517.798	454.827	438.194	390.887	399.397	326.015	539.593	939.235	831.887	303.223	252.021	508.46	571.783	526.514	764.259
ADRA1A	123.601	116.793	117.447	115.167	116.836	111.577	119.008	115.383	114.376	123.673	111.206	116.411	116.548	115.027	122.948	119.535	129.325	116.194	116.045	120.351	118.886	117.894	120.477	118.999	113.194	116.952	117.025	119.653	117.974	119.144	120.454	121.485	118.347	117.071	123.434	115.989	120.847	118.192	118.84	120.516	116.381	115.421	117.816	114.328	123.099	120.594	119.903	114.895	114.193
ADRA1B	120.752	122.773	127.012	125.079	132.375	119.5	123.83	122.417	116.41	129.506	128.243	130.059	124.946	114.687	126.676	124.504	125.975	124.557	125.33	115.998	115.844	115.293	119.674	130.486	126.874	123.889	126.389	123.325	126.123	127.684	117.702	120.34	129.976	119.392	111.162	123.466	119.586	112.533	122.35	123.185	125.209	117.021	129.755	118.609	114.092	117.468	124.35	123.866	118.25
ADRA1D	115.56	113.083	113.26	113.369	113.123	115.035	116.366	114.444	125.077	125.288	116.864	125.922	119.431	121.442	118.427	124.207	124.682	117.79	116.714	111.964	122.901	120.16	121.73	122.257	115.272	115.402	114.329	113.145	122.653	123.507	110.472	118.737	116.075	120.145	125.008	116.563	118.953	131.275	119.597	124.835	114.018	120.629	116.475	130.18	115.911	125.087	118.921	116.688	116.489
ADRA2A	157.246	144.541	142.949	137.105	137.166	143.917	176.317	153.887	154.611	177.549	152.797	176.035	155.683	144.607	161.53	148.073	149.853	150.47	144.527	163.559	147.872	177.507	156.671	152.325	141.767	154.334	146.168	153.387	158.738	147.326	145.605	172.749	174.149	137.77	153.434	173.707	151.3	150.447	160.48	196.606	161.624	172.831	168.173	162.03	195.881	146.712	143.769	171.193	138.585
ADRA2B	145.605	144.294	192.369	163.394	149.25	161.306	154.884	148.674	149.224	173.778	149.004	171.45	145.808	159.973	148.473	150.958	149.034	199.423	154.784	172.401	168.118	144.744	139.129	180.801	155.699	181.861	167.405	166.465	158.794	146.755	143.909	149.372	190.917	156.215	140.389	151.16	138.149	137.599	153.524	179.702	142.368	171.531	162.828	148.86	191.97	152.096	146.539	146.141	166.638
ADRA2C	122.795	125.64	122.827	123.353	119.677	125.822	120.626	126.095	119.982	115.709	123.396	120.167	120.226	117.409	118.727	122.198	127.391	125.497	122.795	120.367	127.376	123.718	124.2	121.715	118.431	126.588	124.601	119.541	124.812	125.728	118.132	118.184	126.169	126.361	124.019	114.876	118.227	127.507	120.584	128.486	145.704	122.638	126.556	118.571	120.263	119.1	121.644	130.588	117.605
ADRB1	128.983	131.327	117.597	120.822	139.322	114.479	115.709	125.12	123.322	124.431	117.918	124.637	120.332	118.344	124.785	125.571	119.955	127.678	122.111	131.388	120.106	130.25	128.233	125.977	122.974	123.829	124.735	140.892	156.31	130.512	130.158	129.326	129.647	119.618	120.654	119.225	114.039	121.629	118.092	124.858	127.171	137.316	124.665	124.91	132.165	123.244	123.401	117.839	125.075
ADRB2	1569.97	988.494	945.201	1272.27	1268.17	1367.19	1722.99	1394.76	842.261	1397.41	1225.89	479.514	792.642	1066.03	1048.87	1349.89	1952.28	892.79	1092.66	858.832	893.217	665.149	1118.75	1061.07	536.913	566.37	576.496	730.615	936.928	686.644	402.571	609.898	361.765	622.938	736.966	625.378	492.901	590.635	490.417	428.462	362.437	627.017	706.448	379.745	1813.56	846.889	415.021	894.627	1266.9
ADRB3	116.044	118.737	120.889	120.944	121.897	124.587	121.231	124.966	117.059	123.645	117.812	123.377	117.91	132.611	118.841	128.272	133.759	118.265	119.141	122.29	115.417	116.685	115.29	118.808	117.055	117.825	125.931	119.835	124.357	116.546	119.984	116.197	122.86	119.633	123.931	116.774	123.193	133.709	119.443	118.781	122.368	123.944	123.546	119.973	118.71	120.597	114.362	120.175	115.195
ADRBK1	2595.53	2795.14	3211.82	2629.92	2165.26	2553.97	2952.41	2622.77	1147.96	1123.96	2254.97	2699.91	2231.81	2012.47	2383.46	2644.12	2774.83	2470.27	2621.23	1621.33	1876.41	2098.01	1888.23	2198.31	1878.9	3088.41	3006.68	2113.99	1425.14	2278.28	2305.18	2531.75	1807.37	2805.2	2592.13	2414.72	1947.88	2203.04	1992.46	1892.36	2641.22	2822.41	3323.08	2207.79	3032.84	2363.8	2505.3	2136.31	2283.42
ADRBK2	129.492	130.18	130.046	128.642	130.767	136.381	129.955	121.699	153.539	192.677	121.274	127.611	130.764	124.417	133.721	133.697	129.943	150.364	155.982	144.294	133.248	124.605	135.182	124.099	121.368	142.143	133.182	121.107	150.193	122.367	131.043	134.565	146.242	125.764	127.402	134.918	129.383	123.986	132.264	126.596	124.233	135.091	146.621	130.45	159.806	115.715	136.699	141.137	123.388
ADRM1	601.447	640.212	587.39	621.6	710.698	669.978	596.448	872.546	804.713	639.654	976.641	974.779	819.185	935.696	940.321	691.843	722.453	800.292	791.078	1276.59	993.553	923.177	961.671	817.956	735.119	772.016	950.962	817.211	933.44	909.325	1102.65	1120.56	719.221	729.614	706.202	1057.56	886.865	1135.29	1030.22	867.495	842.801	1118.86	1102.41	760.878	857.367	891.464	822.68	835.157	787.659
ADSL	2777.06	3169.34	3352.03	2958.74	2761.01	2627.67	2843.08	2703.63	2202.98	2978.39	1962.43	2009.7	1703.97	1992.98	1828.26	1824.61	1721.94	1790.12	2084.07	2398.1	2463.86	1899.99	2258.56	1722.99	2095	3303.25	3436.63	1572.05	2200.07	2191.14	2251.34	1529.25	1512.08	2200.07	1797.11	2347.42	2674.07	2200.07	2668.17	1497.77	2584.73	3136.59	3389.94	2149.74	5792.77	1752.58	1815.62	2392.63	1729.86
ADSS	1043.28	881.355	812.203	885.272	868.894	726.451	883.027	846.158	938.916	779.215	857.413	1103.61	1074.89	1084.91	973.461	1099.11	911.306	715.747	949.05	535.767	785.822	832.71	949.064	992.776	1130.37	718.959	595.741	1113.35	892.548	897.433	804.492	705.211	766.526	891.419	979.269	871.767	1097.57	741.328	627.783	991.135	1056.82	522.14	458.831	984.608	1790.72	868.043	775.944	674.371	1070.76
ADSSL1	137.109	132.393	131.902	134.143	140.256	136.793	137.863	136.286	129.481	135.069	145.306	132.204	130.801	138.291	135.555	142.188	131.007	141.657	139.042	127.921	128.373	134.773	135.031	138.948	137.053	130.673	130.074	122.957	133.063	139.705	125.382	130.835	133.42	133.544	134.252	131.747	133.809	135.406	131.699	135.373	130.459	126.181	125.129	133.822	124.53	121.849	132.306	121.734	126.41
AEBP1	170.483	162.807	155.567	178.644	171.798	162.679	159.041	163.624	200.483	238.196	180.814	162.67	174.716	178.658	189.457	167.047	162.67	160.361	171.436	148.723	165.27	166.465	160.226	162.267	184.359	179.62	187.621	167.025	163.636	159.816	225.469	253.014	189.534	143.421	200.881	176.368	168.097	229.59	165.226	161.717	154.349	208.962	144.907	177.195	133.341	193.35	181.802	178.573	126.562
AEBP2	292.652	288.678	265.026	269.989	224.008	231.269	262.238	281.877	317.43	408.293	241.733	194.813	233.903	227.029	267.514	318.608	328.592	230.838	316.213	226.981	243.015	235.84	250.143	287.836	286.142	241.701	247.12	264.713	306.143	212.348	224.218	223.068	237.929	277.884	317.728	231.19	235.814	210.789	225.774	216.647	266.018	213.569	180.076	247.537	473.918	239.895	225.856	232.101	351.356
AEN	325.532	349.216	276.355	299.285	281.558	259.442	319.311	306.48	222.067	273.366	248.876	226.956	211.371	238.801	299.672	225.905	218.964	283.76	275.027	391.316	263.173	355.342	315.278	305.249	269.472	291.738	331.136	245.929	265.095	254.018	245.801	266.697	276.654	224.87	266.182	294.458	322.161	284.398	308.21	320.38	243.912	328.745	291.262	262.133	372.279	271.661	266.771	277.973	278.898
AES	862.224	1054.03	815.264	856.752	967.777	860.335	893.447	1001.3	172.653	136.156	1155.41	1022.21	963.128	1101.76	1281.26	1043.97	913.542	999.937	947.777	1311.07	1394.76	1220.61	1206.47	1134.89	954.527	943.961	1064.95	593.562	273.176	818.202	1089.69	1338.34	524.12	736.013	750.472	1154.1	696.981	872.597	1500.49	1020.63	673.46	1077.95	773.309	823.577	168.565	888.697	531.49	828.049	506.091
AFAP1	120.974	122.183	119.844	124.711	123.873	129.646	125.891	125.099	125.377	125.302	117.03	117.754	115.475	125.493	120.788	123.941	123.826	123.25	117.594	124.692	121.584	118.87	121.479	122.093	116.92	126.173	125.318	128.464	123.89	125.392	128.773	121.29	118.137	128.038	118.624	117.384	113.978	116.335	120.07	120.924	127.454	130.295	125.323	122.669	129.458	121.332	131.391	130.245	115.238
AFAP1L1	130.668	133.478	137.967	135.211	131.088	127.032	138.073	129.203	130.971	133.069	131.148	127.639	137.654	129.777	132.322	125.064	129.541	123.05	121.636	115.877	122.959	127.73	122.146	135.732	121.473	155.241	132.556	116.046	139.006	121.038	131.731	124.697	140.635	126.91	137.075	131.871	119.939	122.421	127.165	124.887	139.653	128.392	138.923	126.313	127.451	134.989	121.917	119.412	126.8
AFAP1L2	201.719	226.79	180.628	190.143	188.58	160.838	191.745	176.227	215.201	232.559	171.105	176.666	176.623	171.548	179.846	177.285	193.612	190.765	178.164	148.768	164.427	171.598	176.012	182.894	156.083	169.66	212.159	174.847	200.037	204.059	192.187	171.542	258.734	160.085	194.373	205.742	182.233	196.772	151.073	218.874	164.577	167.29	191.576	198.435	168.037	193.081	183.5	175.596	151.628
AFAR3	128.021	125.777	132.196	129.317	128.373	121.167	126.229	113.846	144.072	128.891	134.28	132.032	140.827	123.629	134.841	121.816	115.458	132.149	133.473	119.044	127.863	128.271	129.375	134.636	131.705	124.502	124.606	131.967	119.806	117.811	132.182	126.195	130.373	121.961	120.732	127.964	121.6	118.26	127.765	121.842	119.305	125.356	122.328	117.533	207.583	125.774	126.416	123.468	120.155
AFARP1	125.273	119.763	122.234	125.192	125.653	124.51	127.528	128.444	121.594	125.82	119.885	119.169	116.551	117.975	118.582	120.37	120.546	118.716	119.26	124.83	123.265	123.661	121.077	119.967	125.792	127.862	135.142	123.905	120.432	118.672	127.429	121.558	118.047	118.618	121.303	118.732	123.279	124.473	121.337	117.003	124.525	125.16	123.603	122	129.944	121.565	127.295	122.602	121.04
AFF1	352.258	274.258	320.869	290.623	273.836	249.853	291.668	238.92	229.175	209.418	260.485	264.43	281.906	301.712	306.215	288.92	312.323	253.425	270.99	310.634	234.995	283.457	272.768	310.76	346.25	268.321	216.145	365.076	351.955	261.592	244.473	254.789	403.036	349.692	321.877	303.153	290.377	213.677	256.806	303.279	297.863	230.857	210.345	349.093	139.392	269.872	284.627	258.16	374.361
AFF2	119.4	118.909	114.065	120.738	119.998	116.196	117.691	113.316	118.747	123.522	125.073	127.145	125.184	121.192	117.825	109.585	121.028	125.097	125.309	114.692	115.701	115.981	122.626	120.49	116.432	115.016	118.068	128.52	120.29	112.686	127.841	115.674	118.677	121.185	119.609	127.865	125.335	118.298	114.22	119.131	127.696	114.144	120.966	119.833	128.465	121.228	114.933	112.096	112.416
AFF3	237.809	213.792	185.055	192.377	212.768	187.451	195.511	147.292	238.162	239.745	231.252	143.805	160.826	217.327	237.7	197.687	201.117	180.981	208.003	141.798	170.242	194.479	172.005	167.085	221.903	223.026	202.683	173.292	156.525	193.43	235.458	244.538	231.668	161.665	237.185	199.856	163.536	190.323	190.022	260.47	131.417	138.337	154.489	187.865	404.794	267.494	239.335	275.717	228.072
AFF4	483.111	479.192	550.833	497.201	444.957	491.077	528.933	468.767	247.082	232.333	470.631	365.793	452.945	459.19	478.647	481.245	472.767	390.017	397.853	277.118	325.092	369.738	439.29	361.932	464.238	430.892	317.335	332.322	367.369	446.34	288.314	408.293	496.909	504.919	535.369	410.916	311.845	238.16	186.601	420.199	268.32	318.745	288.456	420.962	142.083	370.12	431.389	389.756	429.139
AFG3L1	142.224	133.573	138.66	141.53	145.18	148.523	137.879	141.104	124.93	121.748	138.426	134.419	139.253	139.003	141.031	137.453	139.445	142.128	141.637	145.693	136.852	126.519	134.809	135.355	133.461	140.015	142.981	128.871	126.246	141.82	136.987	143.517	144.882	149.259	140.556	148.144	129.988	129.291	123.95	135.483	131.838	133.741	134.046	151.996	135.199	134.442	132.921	133.964	130.232
AFG3L2	996.923	1263.46	1071.22	886.052	992.371	871.642	1000.23	869.046	779.319	1108.66	833.79	682.556	660.592	709.52	752.744	589.908	656.059	868.584	798.508	957.056	712.851	862.671	818	791.316	945.805	985.123	1050.6	609.804	774.702	867.114	704.728	764.259	620.393	905.133	651.194	794.756	727.392	818.829	608.617	552.911	790.426	802.291	763.835	609.478	1121.67	944.421	728.534	815.654	749.348
AFM	121.964	110.869	115.297	121.199	110.076	121.93	113.588	115.527	111.381	119.768	117.205	120.485	111.827	120.445	114.259	111.138	113.787	111.882	112.297	119.829	111.935	126.886	125.843	125.803	124.24	112.504	111.79	132.226	108.355	117.093	124.304	113.232	120.217	117.926	115.646	119.045	117.639	121.363	131.927	119.522	110.099	115.755	112.844	113.165	116.458	116.913	115.937	115.066	122.381
AFMID	168.739	164.202	243.422	187.436	185.201	303.212	220.47	223.412	166.384	162.009	155.766	185.918	164.587	183.028	198.711	158.68	144.69	196.133	180.479	203.345	263.77	224.965	222.613	263.623	228.915	538.997	403.6	260.725	273.595	202.133	161.652	225.373	174.599	186.837	156.494	191.434	195.195	221.47	371.406	220.88	399.62	528.851	1616.68	148.077	314.943	175.858	234.721	219.465	135.944
AFP	114.997	115.5	121.138	115.099	119.798	125.75	125.26	122.322	122.057	120.654	130.694	118.45	115.97	128.018	119.29	114.774	122.4	114.872	117.346	127.365	123.662	117.487	111.694	118.618	119.393	115.257	118.682	117.617	117.738	120.764	118.749	119.156	120.933	115.556	127.216	116.822	122.262	119.95	139.405	120.146	119.964	112.533	114.333	124.915	113.643	118.664	115.516	121.099	125.118
AFTPH	394.342	363.353	299.046	296.061	424.566	357.43	370.618	458.12	617.72	532.942	584.13	543.904	650.888	599.24	606.572	570.54	633.345	507.821	580.776	335.191	483.287	624.92	541.25	694.386	672.862	288.816	303.962	642.403	503.059	497.125	560.384	607.831	577.235	618.795	747.316	654.609	702.243	566.225	486.815	656.812	349.281	251.717	304.009	725.38	262.102	619.387	545.461	502.606	518.697
AGA	502.125	444.432	444.514	527.179	566.844	422.809	522.673	452.415	424.142	519.235	333.497	306.045	447.266	462.186	351.905	442.135	409.886	369.439	451.997	315.375	316.254	358.144	500.566	366.773	406.365	337.879	420.199	422.11	386.626	297.041	489.503	369.169	269.508	366.645	468.415	419.639	471.21	387.92	285.952	357.134	338.424	315.026	299.588	414.58	1044.95	369.169	432.203	319.407	389.756
AGAP1	123.412	118.051	115.559	119.84	123.069	124.23	118.202	124.351	118.062	120.427	118.395	117.997	117.003	138.446	125.905	121.872	117.11	119.598	124.286	122.935	118.951	120.857	118.66	122.752	115.915	118.714	117.113	123.024	121.561	124.4	121.67	115.171	115.047	124.144	116.973	114.21	117.703	122.814	115.428	122.729	121.745	117.203	115.958	113.997	122.186	120.673	117.895	118.84	118.673
AGAP11	112.196	116.645	115.293	114.995	114.434	114.87	112.006	116.415	114.233	122.124	110.03	134.674	109.696	119.365	119.722	108.498	112.907	113.663	118.761	121.315	113.016	112.893	118.2	115.179	114.464	114.511	113.976	118.22	111.607	113.288	119.129	115.061	114.426	117.561	116.355	125.254	120.778	122.034	121.476	114.548	118.775	112.873	114.263	121.634	123.967	117.269	119.472	120.253	122.011
AGAP2	126.803	138.824	130.853	134.666	143.291	150.289	134.729	138.395	132.045	118.919	138.433	140.673	125.319	141.448	141.484	145.292	136.154	127.805	133.499	146.717	147.814	132.82	140.542	148.008	132.517	142.098	136.203	119.653	117.352	133.739	147.215	136.101	124.826	130.99	139.517	141.185	124.242	139.733	138.989	143.838	136.58	137.925	141.382	133.225	116.127	137.817	150.032	146.103	124.189
AGAP3	147.911	144.555	168.127	139.164	152.513	154.762	144.621	136.524	129.41	125.994	141.346	131.82	138.847	136.509	137.963	135.275	136.291	140.538	139.261	139.417	146.874	148.815	152.529	143.694	138.393	166.545	151.185	131.965	137.444	145.362	132.956	143.697	137.972	148.366	138.813	139.363	138.404	139.187	127.218	139.639	156.679	157.502	196.501	132.8	141.191	128.276	128.484	135.971	135.919
AGAP6	334.501	384.646	367.857	367.031	319.82	356.69	371.761	412.301	173.043	158.85	383.283	346.569	298.903	278.193	312.592	359.712	338.517	325.894	308.963	466.58	258.579	307.41	257.475	255.845	250.407	336.103	316.754	249.419	254.323	274.57	277.623	324.203	369.108	256.609	294.861	295.279	226.654	237.367	234.258	293.108	282.644	256.579	252.801	279.416	132.702	319.862	270.792	287.586	286.714
AGAP7	135.958	135.67	124.569	137.048	126.844	141.892	129.337	135.45	127.864	129.291	135.481	125.019	127.403	135.237	129.358	124.028	128.683	129.284	116.274	126.154	122.166	115.424	134.599	123.35	139.273	132.749	128.48	116.531	131.009	126.933	129.07	128.952	118.686	131.487	125.025	129.625	125.206	120.343	127.36	133.125	136.959	123.623	131.824	113.6	126.115	136.219	124.792	127.315	129.606
AGAP8	847.128	834.952	861.129	825.145	563.466	805.196	824.969	930.245	1034.91	1044.95	1137.1	856.467	889.441	822.932	918.694	1037.14	1052.7	906.519	867.876	821.738	670.033	842.785	512.14	773.954	645.8	658.452	700.061	650.227	839.956	648.79	643.817	850.532	692.473	761.707	604.455	600.781	469.772	454.394	710.789	705.124	565	514.601	429.065	685.77	843.923	690.018	668.989	613.997	661.659
AGBL1	111.618	117.228	114.14	115.48	114.976	113.314	113.994	117.534	119.233	116.267	124.844	117.985	117.854	116.764	119.368	118.764	112.068	117.506	115.223	118.719	114.923	113.65	111.482	115.356	122.919	119.278	110.977	116.123	118.417	116.58	114.341	110.737	121.374	119.693	115.072	121.647	112.878	114.912	115.807	113.451	113.862	113.501	110.799	118.673	118.727	121.173	117.011	120.798	121.437
AGBL2	123.085	130.235	127.35	126.443	127.865	120.701	121.701	126.131	130.231	134.254	129.663	120.304	131.175	127.754	124.96	138.818	131.301	138.005	119.269	126.838	123.892	125.934	125.004	133.894	130.656	128.46	127.844	133.286	124.981	131.576	135.055	135.732	132.19	128.059	135.114	127.895	141.255	135.045	131.891	134.889	122.187	127.344	124.585	141.952	119.705	134.784	125.343	125.157	116.663
AGBL3	125.445	110.412	116.561	114.811	121.727	121.336	116.308	112.041	125.555	126.598	116.057	109.309	125.216	109.612	118.913	115.13	114.951	123.788	117.021	121.84	125.969	117.315	112.571	118.717	111.786	117.483	113.491	119.193	117.318	112.398	111.694	112.6	123.224	116.329	127.337	116.788	115.099	124.338	123.772	118.532	142.011	110.609	114.555	111.932	119.686	115.4	122.121	123.746	120.162
AGBL4	108.395	118.194	112.681	113.055	109.662	113.038	113.946	124.865	116.142	118.344	119.209	111.129	109.703	116.502	112.878	115.523	121.686	112.306	111.616	126.839	115.04	116.834	113.166	116.678	120.731	112.53	122.115	121.679	118.761	111.594	127.193	116.902	116.171	116.99	123.214	124.238	122.824	118.213	113.879	120.367	119.153	115.051	122.63	116.378	124.081	118.459	122.326	119.146	119.712
AGBL5	209.817	243.659	244.567	213.777	212.934	187.665	228.238	213.092	210.901	187.385	224.46	278.402	237.472	218.793	207.279	177.234	189.053	236.925	221.824	316.14	236.338	218.714	240.458	205.498	230.587	229.848	204.533	212.29	234.827	238.846	214.427	199.673	275.658	192.305	198.821	206.807	228.31	294.693	312.487	259.028	242.432	289.316	242.873	236.737	122.323	219.65	211.589	217.501	159.079
AGC1	113.023	105.335	122.592	111.773	113.205	119.673	118.272	109.458	119.988	119.422	121.641	129.335	116.632	113.361	121.939	122.934	124.741	129.764	121.561	125.549	125.022	117.619	126.586	123.443	115.163	122.286	119.875	114.334	117.988	117.191	125.247	118.026	118.031	125.617	117.537	116.349	131.816	119.537	137.429	126.395	109.054	124.359	114.533	123.587	130.6	119.023	118.896	124.534	113.06
AGER	135.974	138.216	138.687	137.639	153.727	140.494	154.422	135.915	144.566	136.333	141.028	146.38	147.185	124.094	123.13	133.174	136.236	146.812	154.172	146.324	147.316	141.414	122.525	137.201	133.492	140.66	139.986	161.163	147.235	136.139	149.291	140.868	142.914	131.863	136.346	124.802	131.028	126.744	132.184	142.106	150.488	137.777	135.744	139.26	146.948	154.445	134.346	134.968	130.707
AGFG1	315.873	305.535	298.128	250.479	245.754	218.857	266.38	203.945	469.814	504.125	318.345	334.175	313.876	331.744	315.65	350.39	331.215	284.427	366.609	357.084	310.885	497.275	442.479	418.646	537.035	242.133	233.645	463.224	277.172	282.545	330.997	328.656	626.755	459.028	452.241	316.755	486.009	511.358	359.599	706.522	279.428	188.784	250.153	519.979	589.585	350.57	309.829	271.396	305.394
AGFG2	166.918	170.537	152.718	155.201	151.936	162.068	158.463	162.56	136.374	142.26	145.996	141.241	142.496	149.771	155.109	155.21	164.262	148.206	139.741	172.718	167.684	158.366	157.038	147.671	170.961	164.001	172.964	147.355	147.364	154.623	149.296	165.416	143.758	146.738	151.77	177.348	142.58	145.021	150.6	137.825	146.88	186.288	156.048	146.734	152.667	153.064	145.016	156.476	135.483
AGGF1	776.689	701.951	693.086	648.596	522.743	476.894	653.22	517.319	706.491	739.966	593.024	507.722	584.832	615.553	567.187	736.336	683.718	576.504	603.258	296.419	509.704	549.776	555.304	563.249	662.702	537.315	498.173	628.203	618.105	554.186	453.616	495.879	433.104	650.583	729.449	533.703	608.46	495.299	477.242	519.188	521.393	405.926	390.575	665.878	370.651	590.476	531.164	543.271	588.798
AGK	627.017	621.509	538.233	603.191	567.259	487.743	629.092	697.813	589.695	541.678	536.222	421.816	456.571	465.464	460.518	521.704	598.95	460.91	629.641	521.135	540.611	487.308	520.94	482.455	496.791	440.51	542.9	392.42	633.957	502.013	422.192	384.503	413.812	681.431	396.553	528.014	597.026	411.83	557.744	426.287	401.089	458.876	432.279	438.099	760.514	510.389	463.374	441.154	605.438
AGL	128.754	129.807	130.181	133.441	129.641	129.405	128.322	131.108	124.381	132.478	122.232	125.172	127.142	127.311	127.433	123.543	122.484	130.045	121.706	123.593	126.97	120.953	134.626	126.9	123.191	132.815	132.437	126.085	124.104	129.837	130.515	132.795	128.779	137.975	130.295	128.691	126.459	122.038	128.052	126.463	132.477	135.416	133.38	130.008	129.22	130.919	125.387	129.411	132.147
AGMAT	168.552	191.953	191.169	158.207	191.521	182.44	157.179	179.847	129.86	141.4	156.863	135.715	155.596	154.215	145.986	153.27	143.851	137.877	141.215	150.776	164.063	154.927	163.459	143.746	171.125	158.104	213.594	125.159	138.744	201.159	156.317	154.011	135.546	159.973	157.003	159.175	155.707	153.968	168.492	134.599	140.497	224.329	130.29	166.263	197.439	144.991	193.145	207.869	137.179
AGPAT1	125.76	117.484	127.512	120.189	119.097	117.671	117.061	126.467	114.865	121.886	121.129	117.183	126.37	117.522	126.451	128.055	118.925	127.502	120.567	123.48	115.452	113.242	114.696	121.285	123.65	117.325	122.069	116.395	114.422	118.795	119.908	130.492	114.33	118.726	115.874	122.165	130.423	122.459	115.158	117.549	121.825	117.915	124.333	110.224	115.66	123.018	127.272	124.274	118.147
AGPAT2	207.202	235.275	239.115	260.484	232.184	221.517	234.67	231.728	212.377	167.036	243.967	399.632	295.528	252.671	280.05	256.88	230.813	324.418	317.087	303.178	300.501	314.633	308.21	284.998	295.528	385.976	346.93	490.601	316.213	365.544	318.565	362.264	333.381	273.065	261.092	314.971	330.944	486.167	346.388	353.126	451.668	483.213	686.217	345.302	130.474	329.422	308.821	281.113	216.689
AGPAT3	137.393	129.35	139.37	128.009	143.287	138.844	133.58	141.097	120.376	124.558	148.345	150.862	150.849	141.93	153.763	155.791	146.721	161.566	156.679	160.967	138.853	130.002	142.48	153.553	136.176	142.759	144.864	123.878	125.454	158.694	162.965	177.549	164.563	153.504	156.086	161.2	164.554	122	133.705	139.903	146.103	151.808	168.989	161.854	114.878	151.787	152.757	144.876	233.399
AGPAT4	233.869	181.972	209.206	248.678	209.7	177.02	282.317	195.218	371.098	313.295	231.816	252.036	239.628	219.361	245.978	241.501	254.166	226.35	310.86	225.623	251.857	297.95	250.698	315.62	227.678	167.81	164.101	225.952	207.586	203.264	186.679	207.788	204.796	260.054	201.748	172.49	211.668	198.003	172.452	214.367	185.881	161.908	189.02	183.399	409.769	200.141	152.002	184.123	208.064
AGPAT5	294.811	288.768	283.245	278.74	234.284	190.861	252.767	225.415	173.839	152.503	257.697	211.531	233.234	264.825	289.33	252.155	272.255	241.701	243.735	270.973	202.822	208.849	234.456	278.983	254.248	253.647	213.762	237.162	278.579	242.567	219.671	192.353	282.438	267.431	358.816	298.394	247.632	164.073	216.456	245.828	187.977	198.339	167.711	287.553	120.015	261.574	248.661	252.407	362.074
AGPAT6	164.516	213.315	177.359	171.773	187.135	196.315	182.143	169.727	134.44	138.312	142.77	144.234	140.329	151.677	143.14	136.174	140.414	151.315	135.591	177.25	137.06	139.309	161.549	135.764	138.899	163.695	157.957	131.591	132.082	149.578	146.517	149.902	164.404	142.879	148.778	167.036	147.189	157.453	140.341	138.786	147.205	184.076	207.184	137.535	129.074	139.184	146.974	148.711	121.678
AGPAT9	429.857	706.608	640.954	643.817	394.522	654.609	532.598	414.58	763.835	940.97	502.778	688.237	751.035	550.239	574.615	897.119	676.245	886.751	869.941	364.845	492.691	613.305	422.734	599.493	543.016	794.756	469.871	1244.29	629.476	412.844	385.346	659.821	568.787	666.623	713.623	449.826	679.127	610.634	594.129	794.947	1212.04	553.724	923.981	752.538	802.291	588.735	897.119	430.97	809.992
AGPS	402.498	348.514	454.979	398.574	421.653	348.929	380.494	436.345	379.014	348.395	385.425	441.901	396.067	401.796	386.981	460.91	411.599	393.966	411.524	336.477	353.616	331.226	431.742	490.3	471.868	402.932	410.4	591.211	419.874	474.905	463.144	355.67	488.646	615.562	602.936	480.688	584.7	394.672	349.33	481.924	542.448	336.047	413.07	602.936	1078.34	396.419	472.043	369.381	653.081
AGR2	125.328	119.875	126.16	118.476	117.048	118.515	123.035	126.134	127.309	126.724	118.929	124.149	123.111	117.906	115.5	120.922	117.407	121.59	121.078	122.332	120.741	126.745	128.742	121.798	128.417	120.689	125.65	121.779	123.931	130.167	124.816	116.19	129.731	128.417	123.886	127.443	132.164	120.268	122.161	118.374	119.763	121.13	126.83	120.82	117.671	128.173	128.929	131.865	133.625
AGR3	122.538	118.699	128.982	132.68	125.214	128.53	125.113	123.471	118.73	128.129	124.956	123.226	121.061	130.583	124.754	130.853	123.085	121.498	123.832	124.39	126.354	130.296	128.069	123.868	123.934	125.032	127.321	117.766	125.513	122.459	118.662	126.678	127.071	122.012	122.229	116.452	118.174	127.967	127.022	134.878	127.64	121.04	123.036	118.089	132.236	124.25	128.839	131.906	123.027
AGRN	163.362	183.141	177.107	179.527	156.848	172.241	159.042	167.358	159.06	150.154	156.461	167.17	169.608	154.701	171.609	169.717	158.734	184.414	151.071	166.193	163.368	184.572	168.141	192.604	172.186	199.126	192.757	207.488	240.888	158.417	163.034	208.44	175.356	161.248	160.824	179.917	145.847	206.469	193.062	183.864	241.876	231.812	220.346	173.079	194.99	161.982	191.062	174.315	171.5
AGRP	121.948	121.412	131.654	124.842	131.39	126.081	126.375	122.918	128.325	118.207	125.646	125.293	135.936	134.206	124.247	121.321	118.866	130.417	127.844	127.008	128.53	124.708	129.096	125.582	121.325	131.492	142.163	137.614	122.739	122.671	124.497	125.258	116.472	135.845	125.298	123.495	126.83	128.104	128.987	124.05	133.333	132.147	150.275	127.838	202.007	130.124	132.133	130.926	127.169
AGT	119.189	115.306	123.595	124.639	125.766	117.682	123.714	114.534	127.199	121.975	118.844	118.162	117.831	115.359	124.874	121.618	126.634	118.926	119.083	124.267	119.893	120.547	118.263	120.189	121.47	118.88	112.143	130.687	119.15	120.882	127.698	119.638	116.713	122.46	119.25	121.458	112.24	120.54	116.368	128.245	119.796	118.093	121.553	124.338	125.867	119.057	132.616	114.773	125.388
AGTPBP1	753.981	635.594	612.074	849.915	566.64	672.92	715.707	563.951	965.699	972.778	846.68	884.45	943.345	733.942	817.888	888.183	968.225	772.505	956.392	667.465	628.815	881.18	766.076	908.349	905.858	629.904	509.968	1278.56	705.672	676.935	649.442	807.467	1040.27	823.326	1064.66	609.562	1085.18	814.651	564.624	1088.19	729.972	369.125	486.629	874.807	818.843	861.22	724.351	536.749	590.999
AGTR1	126.709	126.056	126.454	125.183	132.329	125.272	126.275	122.913	131.128	122.484	125.339	122.168	125.297	125.708	122.359	121.436	124.063	123.609	113.146	122.408	123.544	127.599	122.009	122.272	124.841	118.487	127.947	123.895	123.347	120.674	122.958	121.986	114.361	126.574	121.702	121.869	122.761	129.271	123.487	121.569	122.82	139.383	122.983	132.125	123.549	121.925	124.905	121.566	120.568
AGTR2	123.586	124.949	125.36	125.163	132.432	130.343	124.141	122.11	118.845	127.619	122.413	132.966	120.864	117.731	119.786	127.284	125.749	128.354	126.538	139.505	122.774	122.838	120.417	139.522	120.817	122.513	134.192	128.718	127.651	141.687	115.735	126.839	120.75	128.861	129.753	115.164	123.718	123.234	132.807	127.189	125.217	131.881	124.96	123.013	158.172	143.851	133.504	128.894	155.631
AGTRAP	354.58	348.125	390.188	388.972	344.474	514.086	368.748	410.054	504.063	352.629	514.474	701.525	568.372	485.139	573.753	453.226	424.56	598.031	539.476	722.484	554.191	653.404	649.329	548.049	493.043	750.076	705.892	883.457	650.257	690.412	489.394	652.197	600.397	357.139	436.524	555.758	646.985	1059.52	771.764	703.629	979.706	913.208	1774.58	584.72	125.309	577.413	793.441	495.978	399.011
AGXT	124.688	127.696	131.685	127.352	124.504	129.951	127.541	127.792	122.184	123.389	121.67	129.573	119.026	119.883	124.904	124.204	131.242	118.403	122.847	122.794	129.074	127.933	117.914	122.742	124.415	131.805	126.802	133.891	133.955	122.197	123.272	132.177	126.892	126.857	130.5	120.167	121.746	110.897	127.131	121.193	130.113	129.996	128.36	127.439	122.63	126.751	126.047	126.374	128.53
AGXT2	114.985	119.958	108.615	113.585	112.696	115.159	114.385	114.794	108.83	108.601	121.028	123.543	111.295	121.566	112.347	116.65	116.967	121.193	109.641	114.785	117.291	115.553	128.881	112.321	119.469	112.91	111.383	119.871	115.207	116.004	114.667	117.407	129.912	116.104	119.756	113.602	116.688	107.804	112.204	113.068	116.617	115.851	109.769	117.683	110.622	119.637	123.334	116.32	126.109
AGXT2L1	113.722	119.694	118.892	118.452	117.24	118.902	118.62	112.767	121.705	117.894	115.06	116.304	114.96	116.412	107.303	120.846	116.256	119.265	119.176	119.94	123.906	113.184	115.82	112.782	121.465	121.15	114.04	127.153	115.207	116.547	119.231	109.068	116.064	116.092	117.328	118.685	114.458	125.142	118.448	117.295	121.056	114.201	122.129	117.365	123.724	114.277	114.296	117.986	118.329
AGXT2L2	323.508	359.625	467.638	423.075	367.046	495.947	460.247	475.789	306.694	315.773	346.592	444.237	354.01	284.521	378.795	376.656	266.692	373.221	290.808	482.661	433.519	381.639	341.561	401.336	399.278	511.226	451.026	273.659	247.29	297.841	414.408	403.56	379.375	322.243	320.124	340.393	345.268	430.584	348.298	369.251	452.41	516.965	528.506	248.103	142.263	367.041	368.966	338.278	322.479
AHCTF1	382.593	464.336	416.21	390.452	318.057	381.075	403.957	345.791	509.699	810.918	350.089	376.539	445.84	355.478	372.399	399.073	402.932	313.348	563.01	339.024	344.928	329.675	336.756	361.873	333.189	245.29	287.074	511.494	366.247	331.297	344.287	263.173	399.85	361.601	428.677	347.426	406.058	294.132	350.677	411.203	263.39	274.502	194.165	431.223	232.362	347.426	416.932	355.156	360.703
AHCY	667.752	724.884	772.129	738.14	824.73	753.875	687.106	915.429	371.37	295.791	846.18	807.226	828.676	703.527	767.754	598.801	558.477	442.317	424.887	1103.91	886.96	747.848	831.421	529.605	696.825	1087.94	1002.25	815.473	938.37	1164.05	987.911	822.932	765.837	1054.03	795.377	1155.7	993.57	1032.39	617.325	809.372	853.617	1141.13	1186.46	733.943	116.153	901.536	632.737	784.984	937.197
AHCYL1	1191.18	1094.03	1040.61	1335.27	1172.85	1004.4	1334.75	1162.27	1904.41	1926.34	1391.82	1776.4	1624.78	1607.01	1809.2	1552.97	1786.46	1609.92	1986.75	973.721	1226.34	1461.45	1333.7	1393.55	1364.38	1042.02	1126.63	1432.22	1533.55	1216.03	1547.39	1507.96	1376.44	1561.4	1842.88	1423.44	1405.99	1317.22	1343.29	1328.32	1165.84	1000.95	977.149	1585.23	1033.45	1633.21	1056.09	1465.78	1442.64
AHCYL2	213.896	236.944	230.349	231.19	209.024	211.69	221.697	224.329	318.692	290.158	261.118	239.339	282.918	222.913	251.821	258.388	233.027	230.405	221.971	296.435	225.929	279.017	227.454	237.367	250.143	235.612	220.737	274.699	316.002	234.103	242.567	245.623	243.879	212.865	240.462	205.998	215.687	204.936	217.784	225.065	208.849	201.783	214.892	231.799	264.713	262.133	197.66	257.047	189.372
AHDC1	152.177	141.648	131.113	140.044	137.579	125.644	139.349	127.414	189.736	179.049	158.947	164.888	148.447	160.658	176.476	143.788	150.354	131.686	137.908	160.117	169.65	157.763	143.296	149.136	141.117	132.784	134.885	159.033	149.12	147.705	163.351	168.7	138.19	140.924	138.252	167.841	140.521	139.642	165.622	153.617	130.375	138.318	134.168	138.628	134.089	159.109	150.595	141.13	128.086
AHI1	219.119	151.49	132.484	164.952	164.123	134.586	154.284	142.578	239.168	344.357	197.944	201.666	171.788	163.695	190.071	209.189	189.566	178.409	170.061	149.415	133.289	208.013	152.706	158.73	188.892	135.485	119.73	183.773	173.564	195.407	203.59	132.527	136.424	201.902	223.907	168.118	142.945	133.63	159.46	155.341	117.268	121.37	113.972	161.98	465.733	191.043	144.212	191.636	175.124
AHNAK	240.625	193.888	240.649	215.881	243.291	268.602	212.646	273.789	233.839	176.268	198.549	265.79	221.769	230.596	248.331	229.937	204.604	222.219	220.194	331.671	297.701	303.178	279.566	292.433	324.358	335.235	257.289	272.016	227.83	222.61	204.917	354.579	301.539	207.619	197.797	213.464	262.923	314.971	285.305	255.746	229.018	321.742	509.263	207.519	232.446	230.376	183.894	214.673	208.981
AHNAK2	120.945	124.781	115.886	121.369	116.504	122.182	118.377	123.32	125.714	118.936	112.003	120.831	111.992	124.678	122.276	118.249	115.805	120.08	115.901	125.022	124.843	112.977	115.512	114.061	132.076	119.479	118.984	109.7	125.254	121.287	126.958	117.053	116.199	125.255	121.33	117.725	113.765	117.741	114.929	115.037	121.499	120.354	119.467	122.79	118.517	138.193	121.383	124.528	134.308
AHR	2780.31	2554.06	3127.19	3219.44	2906.56	3480.08	3526.77	3053.8	2119.04	1404.67	2609.29	2225.3	2434.83	2635.42	2639.99	2883.05	2786.28	3909.29	3071.57	2203.98	2215.59	2634.46	2385.83	2924.38	3101.07	2661.47	2603.21	1895.16	2356.62	3118.15	2196.76	2896.64	3099.14	3895.69	2317.49	2255.11	1623.69	1540.51	1911.86	2953.75	2396.29	2189.02	1893.37	3010.26	1677.56	2571.54	3895.65	3289.05	2906.07
AHRR	119.337	114.877	115.402	117.339	116.172	115.841	114.231	113.925	123.689	113.008	115.031	114.324	115.825	125.335	118.642	120.677	117.651	111.5	118.104	118.966	121.79	112.231	121.349	113.797	115.608	115.108	110.56	111.038	116.776	120.815	115.217	116.837	109.132	113.145	128.268	112.706	119.201	115.048	114.083	113.018	111.748	120.65	116.635	111.035	113.587	118.171	117.328	126.85	114.567
AHSA1	767.137	867.392	846.625	771.704	990.2	786.745	818.202	680.644	407.906	305.581	550.725	440.776	517.798	601.345	655.895	579.687	547.527	722.874	570.999	977.775	600.377	418.174	680.347	624.77	570.222	706.608	758.014	513.112	810.223	556.299	654.166	601.345	480.119	446.677	491.262	693.324	493.069	519.766	458.714	325.481	687.306	818.202	842.033	512.14	139.721	460.592	568.385	539.709	545.354
AHSA2	1088.29	578.604	1044.26	1304.79	881.443	776.043	840.184	863.802	1522.93	1837.17	1838.52	1473.01	1373.38	1284.58	1269.8	1826.19	1132.58	1134.16	1171.03	458.791	912.521	1002.55	747.848	1165.36	962.307	723.468	697.654	1395.83	831.625	1062.62	1232.63	1068.47	1051.6	1498.35	1249.92	1180.86	1200.33	1159.4	727.177	1066.03	594.129	446.582	457.784	947.193	2523.54	1245.68	657.266	822.178	950.929
AHSG	120.456	109.823	109.285	116.191	110.876	109.777	113.067	106.692	117.347	119.827	126.569	106.565	117.776	114.093	113.459	117.736	111.019	116.611	117.281	112.73	116.882	113.336	110.178	115.553	118.487	113.479	114.92	117.393	111.692	117.376	117.784	109.193	115.653	116.957	114.912	110.254	115.932	111.914	112.813	114.662	114.48	115.222	112.547	117.08	113.595	113.324	110.268	108.85	111.4
AHSP	146.712	220.291	314.24	192.917	148.149	247.12	241.505	166.857	232.689	203.503	220.625	611.205	160.938	387.783	162.633	146.957	164.103	462.981	371.701	142.759	159.89	194.756	469.266	169.334	212.44	205.592	458.384	264.635	885.607	344.357	350.384	185.249	161.083	140.521	429.215	225.607	189.289	10796.1	544.012	404.315	18569	2492.38	289.536	216.81	1822.84	136.422	496.608	754.55	220.492
AICDA	131.086	128.819	135.436	134.21	133.773	135.976	129.123	133.807	130.54	132.039	115.303	130.162	122.972	125.314	121.685	133.54	125.03	134.226	129.61	133.131	122.516	131.201	127.533	120.729	133.367	135.01	129.565	136.963	145.506	125.105	130.655	132.94	129.249	129.468	120.931	133.256	127.2	127.923	129.919	126.534	136.096	130.349	139.318	118.96	130.404	143.425	120.135	132.563	131.306
AIDA	2342.71	2320.95	2073.64	2216.82	2053.66	1437.73	2228.76	1735.07	3269.11	3649.17	2096.26	1782.92	2128.03	2324.3	2202.98	2076.44	2580.57	2343.94	2558.93	1470.55	1993.97	2343.94	2469.13	2430.28	2614.95	1498.35	1664.6	1810.02	2266.38	1993.97	2862.16	2389.36	1979.64	2696.69	3070.65	2479.59	2763.58	3075.62	2182.91	2297.71	1649.7	1175.07	879.708	2144.34	4237.93	2901.35	1644.44	2148.54	2648.21
AIF1	1137.48	1846.79	3218	3597.12	1737.99	5256.25	3285.2	3658.91	1136.68	438.704	1681.63	2130.98	2234.5	1226.34	2678.31	3194.94	1154.1	3259.08	2686.38	1054.79	2883.63	1511.47	2214.64	4266.95	3748.4	6505.49	3122.67	1228.51	1189.02	2092.56	1268.17	3516.98	3327.48	2420.19	1674.28	1827.25	3899.8	2303.17	1058.72	2552.45	3776.43	5291.68	7941.77	956.748	206.611	963.761	1240.36	1813.56	2072.12
AIF1L	145.196	143.634	153.971	146.439	136.093	140.779	144.059	141.18	141.794	140.163	136.315	144.504	145.053	142.796	140.423	148.264	139.737	140.604	137.109	138.985	130.838	136.046	133.445	139.684	146.114	151.487	155.453	140.063	132.853	155.716	135.924	135.616	137.487	141.373	131.262	127.984	142.672	134.84	154.432	147.809	158.113	144.402	166.484	151.234	188.75	139.243	152.385	166.925	136.429
AIFM1	223.547	231.943	254.215	248.95	257.37	245.116	239.796	286.316	248.859	262.431	228.451	222.394	205.837	224.701	228.537	219.024	227.337	226.677	220.855	309.663	206.653	217.255	220.837	211.801	196.982	253.14	282.817	220.702	277.658	231.844	252.6	228.98	235.372	269.117	227.253	238.824	242.296	212.351	201.569	205.635	251.326	245.228	273.457	235.234	227.126	233.096	247.841	249.482	256.318
AIFM2	135.057	134.192	129.321	135.714	140.054	134.082	131.708	137.229	164.516	149.947	136.3	145.21	130.208	131.883	145.536	131.652	137.296	130.27	123.968	145.991	125.742	138.366	126.201	130.179	134.577	139.845	125.091	137.271	142.843	135.994	140.017	132.634	138.143	135.853	137.402	130.01	131.253	121.02	138.458	138.739	129.077	134.07	129.091	136.482	114.94	146.12	134.489	143.776	129.562
AIFM3	134.919	146.881	138.275	140.228	135.3	136.473	139.203	136.035	152.141	144.519	141.144	144.311	141.148	143.166	145.747	134.77	131.632	143.623	136.831	137.201	133.757	140.426	143.197	128.114	139.04	138.801	148.57	153.172	152.503	144.917	137.596	144.96	147.337	138.107	139.897	142.949	127.289	154.588	142	132.35	159.236	134.37	156.923	133.907	171.736	152.571	159.99	143.056	134.156
AIG1	216.507	226.929	188.615	215.002	219.348	182.977	187.032	196.571	244.514	228.405	190.938	218.352	196.081	188.125	178.476	175.667	195.407	178.543	188.875	261.316	198.629	213.511	221.059	164.484	193.738	179.477	159.729	211.103	216.251	180.894	227.233	175.718	180.219	169.44	178.796	179.593	188.225	194.623	211.909	214.381	343.47	200.339	187.135	221.258	245.623	176.355	184.555	202.688	152.238
AIM1	303.929	342.637	306.239	287.362	262.923	310.596	284.016	271.621	376.033	333.747	339.992	363.912	362.502	332.149	372.175	347.599	343.526	354.529	323.185	415.935	305.877	350.506	346.06	329.066	395.548	246.88	257.146	536.222	535.04	328.429	522.441	374.611	492.985	367.978	447.018	361.664	329.622	338.694	288.768	381.859	299.416	262.49	351.409	500.656	188.774	437.559	425.747	464.429	461.736
AIM1L	128.098	126.021	125.549	120.51	121.852	118.499	120.431	126.49	125.773	122.681	122.571	125.419	120.598	118.77	125.522	119.573	123.25	119.488	123.47	117.887	122.148	124.098	123.376	124.154	116.447	120.513	122.084	118.231	123.981	124.702	120.118	121.576	126.539	123.941	118.275	123.263	122.141	127.067	127.353	128.282	126.315	122.186	118.682	125.641	118.121	121.478	121.713	119.962	125.091
AIM2	256.265	239.55	299.632	364.302	326.962	420.486	396.552	512.662	461.72	420.24	221.177	302.067	335.342	257.177	321.535	400.88	359.644	341.144	433.555	401.399	314.333	261.809	267.185	355.887	227.931	311.342	334.615	391.421	749.706	374.9	590.944	305.254	235.108	305.425	331.621	504.546	453.795	364.895	262.579	239.875	292.038	253.734	235.801	299.59	476.18	291.648	814.524	478.458	681.996
AIMP2	1122.07	1046.46	1089.03	1279.42	1317.22	1378.49	1208.42	1333.7	1125.62	965.649	1111.58	870.922	915.12	1014.37	898.41	977.149	886.96	1111.58	870.404	1184.66	1069.15	944.935	991.773	1095.75	833.79	1259.73	1699.72	764.639	1494.51	1297.68	911.044	1093.73	855.31	998.468	862.671	1097.42	1057.99	952.563	907.322	767.137	1022.97	1484.78	1539.31	992.096	2380.77	1228.51	1289.89	1195.25	1210.27
AIP	768.852	994.862	893.447	870.662	883.315	1062.21	841.613	980.269	818.202	948.917	1113.91	1007.44	1003.4	955.151	1047.87	699.755	811.599	989.125	799.581	1371.15	1499.84	1236.07	1147.17	995.191	1084.13	1068.84	1146.04	807.226	985.431	977.149	969.553	1089.69	747.316	701.753	719.716	1070.87	826.99	1259.73	1497.11	802.923	1094.36	1616.83	1371.85	656.059	2568.57	1259.19	883.616	1172.48	728.878
AIPL1	121.601	126.205	125.765	126.351	121.893	133.313	123.92	130.509	120.471	112.927	125.008	122.39	118.376	118.231	119.71	120.445	125.972	122.741	121.454	128.296	120.18	123.935	129.807	122.634	120.883	127.21	128.535	111.337	124.409	124.592	129.15	121.486	120.237	127.122	123.066	119.118	121.097	114.268	118.199	117.064	125.644	130.407	126.683	129.862	129.197	124.971	120.725	122.357	116.464
AIRE	122.287	120.016	123.635	123.609	126.462	122.261	117.564	130.732	122.907	122.951	117.698	128.121	125.532	125.224	126.565	124.485	121.449	117.086	127.606	137.476	128.21	126.68	111.674	118.922	121.58	125.768	118.875	142.953	128.399	123.516	132.541	130.013	122.972	118.126	128.875	129.479	120.693	122.16	131.034	124.034	123.455	124.74	128.821	127.196	223.679	125.267	128.211	134.385	133.087
AJAP1	122.604	130.933	122.311	125.049	131.212	124.695	122.938	121.563	123.6	126.132	129.798	121.935	121.147	130.004	128.704	118.79	126.454	126.511	122.463	125.654	121.76	121.557	117.78	120.866	118.006	115.758	124.132	114.243	120.633	120.893	123.209	124.669	120.334	113.888	116.648	121.13	129.184	116.928	120.062	115.448	131.593	129.327	127.582	127.548	116.566	121.875	115.492	121.526	129.213
AK1	278.621	253.258	264.095	214.275	306.045	312.005	266.288	237.958	197.797	168.033	204.538	248.941	176.604	178.2	182.013	221.205	229.1	215.574	220.272	178.163	253.755	212.781	283.08	227.315	194.027	182.761	251.498	169.1	192.694	270.14	214.635	190.21	206.272	262.238	206.865	216.387	190.127	182.129	229.628	180.168	203.159	194.602	155.887	190.411	317.531	214.741	198.629	269.804	134.201
AK2	484.712	509.16	464.429	503.388	537.794	623.506	449.052	549.164	561.129	556.006	409.815	412.301	479.284	410.058	376.31	447.783	346.388	543.452	427.403	472.767	478.386	406.995	473.477	458.957	377.225	690.834	750.839	493.43	676.245	487.567	535.58	571.495	455.664	383.42	369.108	488.241	507.478	567.366	568.787	381.279	651.194	758.711	782.42	444.957	1435.85	505.309	714.396	626.562	597.642
AK2P2	263.323	241.855	243.37	259.942	285.263	241.949	242.159	240.348	248.973	233.582	339.875	271.56	296.765	227.935	220.679	285.605	278.943	314.73	256.165	224.676	215.458	254.018	242.806	258.288	242.481	184.157	207.245	212.759	217.222	213.875	237.162	266.575	234.258	324.471	204.262	240.13	223.283	219.709	181.984	253.958	235	161.518	175.323	244.664	421.966	235.121	254.211	263.209	288.36
AK3	1004.7	952.302	1055.12	1084.13	908.91	676.864	928.522	900.213	781.372	1579.43	908.385	867.657	844.372	963.466	795.581	654.436	810.223	754.732	949.258	786.745	823.782	921.708	734.342	907.811	868.584	769.735	532.821	589.009	588.588	658.818	743.826	671.664	659.31	853.617	789.442	651.034	837.29	799.581	707.106	906.837	743.626	579.922	521.581	645.964	1899.99	821.293	585.672	852.426	575.103
AK3L1	140.311	137.392	142.988	142.323	134.263	141.877	142.592	134.63	145.333	138.243	143.777	138.694	136.859	132.782	132.362	138.386	132.283	140.819	139.206	138.651	130.454	138.468	133.273	140.094	136.905	148.408	143.635	151.029	150.894	140.677	138.834	144.846	152.514	145.701	151.825	150.244	149.063	161.838	146.984	150.16	151.578	156.438	158.676	152.213	213.771	142.805	139.948	133.709	125.143
AK5	134.517	128.709	146.957	133.087	176.863	133.463	135.503	138.815	131.046	128.45	128.214	141.441	123.777	144.449	125.079	131.811	151.642	131.099	119.364	127.491	122.171	125.607	128.312	120.415	135.766	124.554	115.801	125.319	119.433	117.75	116.592	116.312	121.65	128.718	146.413	119.922	129.178	113.291	152.284	125.996	116.291	129.621	122.04	129.717	135.769	122.628	119.401	116.702	134.779
AK7	120.774	115.119	118.596	120.356	112.571	119.18	114.173	122.725	113.3	124.307	107.941	118.933	113.648	118.316	110.213	110.583	107.064	116.002	117.579	115.53	109.686	118.35	119.761	115.324	118.183	125.776	116.927	121.409	132.984	119.001	115.82	120.927	118.332	128.725	111.116	117.377	129.341	114.857	121.518	125.393	121.049	131.264	120.105	123.353	122.019	114.13	125.124	121.384	117.259
AKAP1	126.68	140.324	123.55	130.897	140.034	132.395	138.729	128.561	171.385	176.647	157.988	143.079	143.715	141.692	141.505	147.676	143.077	146.499	146.907	136.96	156.693	147.662	144.237	162.955	155.378	131.653	137.521	152.625	160.621	147.897	175.477	152.026	142.993	151.746	153.634	148.048	143.125	147.985	153.421	137.287	127.368	127.577	132.651	168.101	135.092	167.228	149.815	148.542	124.65
AKAP10	266.495	231.318	276.988	258.929	223.956	240.161	261.395	246.948	177.835	260.659	243.196	234.511	248.911	292.351	251.717	273.11	258.024	247.717	220.806	337.168	218.227	222.355	244.084	299.719	297.551	262.898	274.292	270.863	227.962	250.618	202.763	260.863	376.62	251.57	262.023	236.944	254.15	238.973	204.282	243.32	237.448	206.015	297.427	267.672	122.23	249.208	255.25	209.312	290.673
AKAP11	237.929	231.639	206.385	256.331	200.96	220.518	275.257	195.39	159.962	169.381	196.315	199.77	207.869	186.214	228.56	230.596	204.655	244.989	219.833	165.214	183.13	199.023	178.215	167.69	163.183	171.798	157.246	152.77	146.859	234.591	207.04	225.186	202.274	202.179	210.978	178.365	168.012	145.029	151.148	172.698	152.412	153.037	135.654	204.558	137.3	173.891	213.361	172.881	217.177
AKAP12	131.664	121.504	128.158	127.895	125.983	128.297	121.175	125.88	128.572	120.732	124.849	130.238	134.893	136.416	132.474	125.569	129.191	129.082	137.482	120.92	125.172	138.545	131.71	134.408	133.606	118.335	120.392	133.639	124.095	119.032	120.344	126.3	123.145	130.8	129.777	126.745	124.877	122.615	121.97	121.74	121.894	120.749	125.825	121.442	129.419	121.818	120.619	130.063	118.612
AKAP13	612.322	725.38	529.032	744.399	474.063	679.308	540.957	489.611	710.129	584.013	791.684	675.055	721.032	563.913	696.981	690.356	617.975	634.117	687.306	747.848	594.859	840.184	630.721	734.903	595.255	531.49	489.929	943.67	885.306	681.606	583.295	814.228	716.345	506.315	746.074	489.611	638.38	602.389	527.262	632.319	500.08	509.069	540.747	528.713	197.888	716.89	498.811	608.617	544.873
AKAP14	115.677	114.723	113.545	115.359	118.492	121.76	117.323	114.46	120.921	118.927	125.47	114.726	119.175	121.618	112.586	117.666	114.046	114.24	120.15	113.417	116.742	115.06	120.607	122.129	115.187	111.79	122.545	111.827	117.259	116.908	119.078	110.64	120.239	116.358	119.74	116.885	114.95	119.383	117.352	115.407	119.789	115.753	114.365	119.972	119.947	116.991	114.439	113.584	115.941
AKAP2	133.275	130.524	125.439	126.379	131.49	130.469	120.921	138.938	126.965	118.304	124.173	121.425	130.912	127.811	126.567	130.56	131.398	134.038	123.302	139.022	121.201	124.517	122.668	125.395	128.748	121.409	130.361	122.301	140.143	129.564	122.043	131.082	131.885	138.64	126.337	135.396	129.077	124.828	123.495	133.67	129.55	123.458	125.459	131.527	144.169	121.869	128.57	121.458	140.503
AKAP3	126.532	122.289	120.817	111.657	127.294	135.74	120.719	121.948	120.096	114.082	115.756	120.506	123.604	127.254	123.228	119.71	121.183	124.246	118.559	119.781	122.673	115.762	115.731	117.595	120.538	121.563	123.656	111.694	117.085	124.201	122.206	120.71	121.581	125.443	122.665	120.57	115.371	121.451	115.023	117.919	122.673	120.033	118.994	123.601	126.511	119.476	119.863	125.857	124.733
AKAP4	123.282	121.756	123.035	123.115	123.593	129.416	125.216	123.633	121.22	122.272	124.186	122.286	122.493	127.23	113.661	118.054	113.048	122.796	119.975	124.742	116.258	115.385	120.918	119.044	119.321	123.868	125.436	117.677	124.235	127.963	121.712	121.906	122.558	122.135	118.748	120.104	123.189	122.199	119.546	127.38	121.609	120.729	119.019	122.185	115.869	119.845	120.648	118.15	119.497
AKAP5	114.48	123.384	116.764	117.769	122.076	120.19	121.923	123.611	120.67	119.6	110.617	122.021	115.272	119.489	117.601	121.161	115.649	123.783	118.299	113.783	116.752	119.643	115.134	114.806	119.59	111.021	116.299	120.175	126.116	114.796	113.903	120.21	120.345	126.628	115.701	116.671	117.947	113.865	117.935	118.052	119.768	119.373	113.803	113.692	131.502	110.157	111.199	117.442	122.556
AKAP6	122.378	118.543	118.583	125.742	114.43	110.766	110.453	115.678	120.084	128.521	115.331	112.225	122.466	113.609	114.992	113.155	117.052	120.936	125.739	117.594	117.281	111.355	119.398	113.113	120.018	111.624	115.241	111.893	119.52	114.918	117.577	127.693	114.697	111.721	114.266	123.251	124.156	116.551	111.65	123.499	117.295	117.613	114.056	120.346	119.381	110.48	122.445	126.101	106.435
AKAP7	134.686	125.477	140.623	123.912	138.357	129.79	129.05	127.329	158.306	159.381	146.885	143.756	135.774	136.957	138.59	142.687	146.542	144.765	136.951	137.545	150.294	150.867	139.415	143.403	141.945	123.435	125.588	143.995	132.46	130.576	146.787	128.726	157.584	135.256	144.287	149.84	183.701	358.829	173.967	173.744	117.175	123.962	116.476	146.183	160.385	138.366	126.27	132.568	127.209
AKAP8	495.607	476.144	439.004	469.961	470.477	418.712	462.981	453.793	722.874	790.055	548.397	554.721	541.881	540.509	554.493	648.941	544.729	684.904	597.026	740.197	560.501	698.672	573.008	541.039	693.854	399.85	435.994	444.605	527.73	512.022	589.791	608.461	650.754	561.129	500.365	538.803	480.971	491.698	541.881	491.53	499.118	416.368	379.209	565.631	684.415	559.519	456.374	521.217	432.822
AKAP8L	266.146	388.411	254.624	259.474	304.848	293.801	264.401	236.885	122.925	128.895	284.745	347.714	258.024	244.181	271.166	234.566	232.71	294.901	279.294	309.737	285.952	317.624	254.424	227.857	281.913	277.585	297.156	182.425	137.168	282.479	357.249	313.153	244.664	231.211	260.235	262.859	280.754	419.3	237.009	228.937	356.753	291.655	256.09	199.118	126.893	302.071	231.799	261.216	189.271
AKAP9	122.971	121.379	121.17	120.231	119.042	117.131	118.219	119.138	138.774	142.53	128.959	119.426	125.186	123.028	121.027	131.527	133.963	122.509	144.711	124.674	117.882	117.736	141.816	116.47	118.287	128.5	121.345	129.125	120	125.003	130.882	118.165	139.726	135.638	141.095	124.325	131.938	121.04	126.236	125.807	117.15	120.798	123.838	129.22	125.542	121.352	122.237	126.904	134.422
AKIRIN1	496.126	482.759	633.474	483.111	656.059	532.491	490.601	577.973	173.233	159.586	644.766	497.293	657.866	666.752	586.597	650.888	697.985	551.282	541.132	730.807	590.474	387.045	693.519	634.775	650.888	512.369	457.303	235.25	187.322	512.369	291.182	420.573	660.464	620.822	553.589	571.362	489.929	245.058	440.14	676.245	364.599	547.527	444.712	570.54	179.327	417.808	514.114	424.887	685.954
AKIRIN2	1123.51	1165.36	1115.77	1292.3	1188.62	1253.93	1170.68	1294.44	2155.75	2275.91	1345.12	1527.22	1548.03	1361.7	1335.72	1468.26	1364.38	1475.39	1749.84	1090.02	1410.49	1390.6	1323.27	1599.06	1253.93	1618.38	1762.98	2558.93	2690.97	1646.66	1309.07	1584.43	3020.28	1219.7	1431.26	1600.03	1556.87	1933.49	1722.99	2095	1696.41	1502.99	1909.98	2236.1	3452.56	1534.28	2012.76	1464.97	1562.13
AKNA	1887.59	2314.66	1731.65	1944.87	2055	2145.84	2440.49	2133.54	2463.86	3146.65	2929	2463.86	2289.85	2201.42	2490.32	2574.74	2765.92	2557.32	2805.1	2730.78	2218.23	2590.98	1985.76	2141.37	2041.02	1703.2	1953.5	2104.36	2093.86	2031.88	2099.05	2294.68	1626.93	1984.59	1870.07	2166.42	1800.19	2027.3	2019.22	2007.32	1652.75	2035.77	1866.22	1609.92	288.278	2293.15	1883.27	1882.16	1855.62
AKNAD1	123.228	120.773	122.668	122.637	131.522	121.681	119.801	125.598	138.915	127.907	131.791	119.675	127.79	123.03	124.774	123.275	117.678	122.544	116.466	120.728	124.207	122.72	125.837	118.498	112.715	121.012	125.401	122.287	124.141	125.2	116.668	122.808	120.686	125.435	119	131.584	124.456	119.528	112.291	130.106	126.105	129.915	130.277	120.523	117.9	120.352	118.929	116.623	122.192
AKR1A1	1134.89	1050.6	1347.19	1349.89	1170.37	1578.71	1288.86	1455.08	886.567	736.211	1369.09	1517.45	1243.89	1311.62	1371.15	1455.75	1198.68	1529.79	1199.5	1680.95	1605.44	1362.28	1463.34	1395.27	1271.77	1572.05	1622.88	1222.8	1930.92	1642.61	1697.13	1724.74	1233.17	1486.26	1169.54	1466.99	1406.49	1673.49	1542.56	1077.72	1449.29	1836.12	2016.69	1275.92	243.941	1309.58	1312.18	1413.02	1515.39
AKR1B1	1311.07	1558.06	1378.49	1558.06	1500.49	1633.81	1522.93	1883.27	1249.11	1307.7	1429.4	1082.62	1302.3	1575.58	1395.83	1249.11	1439.69	1440.71	1047.16	2130.98	1361.19	1241.27	1633.21	1576.24	1556	1650.43	1708.27	1127.81	1541.04	1451.35	1416.45	1278.94	1086.97	1232.2	1066.68	1594.73	1224.48	1604.77	1671.15	1216.03	993.57	1943.68	1574.09	1100.13	366.892	1699.72	1056.98	1338.34	1198.68
AKR1B10	114.514	125.339	127.819	117.646	118.137	123.478	112.041	116.124	124.471	124.49	130.067	117.09	121.346	109.832	127.666	111.094	111.754	119.629	115.079	112.153	113.68	116.366	116.684	118.787	115.511	109.63	121.327	118.18	117.071	116.619	112.411	127.548	122.635	114.805	118.134	123.712	126.627	119.015	112.143	117.515	110.412	116.785	123.378	123.403	149.853	118.55	118.815	120.746	110.647
AKR1B15	120.82	121.171	138.76	117.792	117.311	119.091	119.091	125.889	115.881	117.545	123.108	120.707	111.597	132.498	125.159	113.389	122.149	115.391	119.67	109.803	119.01	117.813	128.91	126.768	128.576	119.752	117.583	122.762	117.593	133.061	118.513	130.529	131.534	122.911	122.293	124.009	126.997	121.505	124.235	121.773	119.599	117.995	120.654	123.179	127.599	123.794	132.134	123.301	120.667
AKR1C1	119.475	114.115	116.066	117.662	120.216	120.158	120.088	112.459	115.302	108.248	114.652	107.236	123.496	123.336	115.494	116.88	115.633	120.929	110.366	115.192	119.123	113.355	121.681	112.63	111.461	113.377	118.699	109.493	111.696	119.475	106.282	116.507	112.214	118.759	118.789	114.839	113.087	110.676	116.941	111.744	117.672	115.719	113.266	124.117	121.675	115.05	117.928	110.268	119.933
AKR1C2	122.053	120.176	121.925	120.486	116.268	119.138	118.62	123.253	117.644	127.676	121.459	119.888	120.994	117.376	122.883	120.305	121.322	117.761	123.491	116.521	121.409	121.659	118.672	117.813	117.442	118.238	121.327	121.98	119.348	117.791	122.283	122.483	120.638	119.327	116.241	118.301	117.394	124.838	116.576	118.448	120.332	118.63	120.111	119.619	130.069	117.483	115.601	115.69	123.5
AKR1C3	1222.8	1128.53	593.303	1062.88	1404.91	1333.26	1420	1292.3	1038.56	743.826	847.675	480.119	629.216	966.482	776.73	1315.23	1916.52	713.623	730.615	398.574	916.604	1275	995.566	1254.42	613.305	451.925	640.775	317.023	762.269	283.049	267.051	372.464	216.898	202.71	281.459	204.471	560.246	334.017	329.675	250.373	230.512	524.854	387.783	261.574	862.454	465.115	570.999	300.009	711.187
AKR1C4	205.979	187.456	160.84	194.442	258.595	247.568	219.749	229.127	131.104	133.593	185.946	146.945	159.168	202.831	178.637	239.903	312.139	179.312	178.249	170.269	191.839	189.606	192.981	242.02	161.448	162.446	160.596	140.694	156.666	140.961	140.117	142.026	139.736	130.495	142.596	136.724	162.925	157.41	141.638	140.036	142.521	165.155	138.55	155.22	147.52	149.198	167.289	141.417	181.048
AKR1CL1	128.89	131.208	125.086	123.324	120.548	125.951	134.925	124.05	138.959	131.665	121.657	130.171	121.498	124.331	136.348	132.858	123.932	133.639	127.778	139.441	129.859	127.547	127.144	125.821	125.957	131.085	124.437	129.139	125.116	129.122	129.708	128.931	121.625	124.325	128.496	122.06	128.26	126.715	127.655	119.225	131.281	134.704	126.834	124.383	134.061	129.104	123.333	125.424	122.952
AKR1D1	9150.91	8970.09	9574.94	9520.7	8494.02	9904.21	9499.39	9343.73	5837.32	4541.28	7845.07	7063.79	8224.83	7343.99	7984.42	7585.84	8621.65	9425.72	7850.31	7424.66	6789.73	8055.49	6793.51	7957.84	7165.83	8271.59	8053.09	5141.13	5903.39	8179.78	7223	8602.44	8522.79	10501.2	7454.78	7453.74	5669.95	4192.35	5345.57	7604.86	8520.88	6992.48	5679.25	7780.6	7327.8	7604.81	10060.8	7717.84	7488.58
AKR1E2	119.717	128.249	125.419	124.006	115.923	125.466	120.647	119.68	124.368	124.707	121.257	129.704	122.661	124.006	122.689	126.372	116.41	122.669	117.252	116.549	122.73	121.31	130.542	118.392	120.654	117.238	121.972	122.431	121.395	122.115	121.322	126.352	126.073	129.994	115.672	126.207	128.91	115.244	120.126	124.475	127.924	127.285	122.846	121.22	137.53	123.538	118.965	119.644	126.403
AKR7A2	1736.03	2047.27	1834.99	1734.35	2007.32	1979.64	1804.24	1703.97	1191.73	1332.91	1619.1	1463.34	1315.7	1435.85	1305.74	1409.42	1458.84	1882.16	1366.69	1291.81	1742.76	1591.5	1550.8	1271.77	1308.21	2192.53	1964	1085.97	1105.39	1607.01	1392.97	1471.68	1176.25	1239.42	1178.11	1418.28	1395.83	1602.31	1982.2	1373.38	1501.83	2316.39	2728.18	1360.71	1351.53	1444.41	1129.24	1815.62	1103.12
AKR7A3	240.742	259.84	247.933	248.065	258.093	267.192	244.812	249.923	283.227	279.358	313.581	276.738	266.366	268.258	283.484	293.862	272.366	289.049	249.629	376.189	336.892	313.286	306.23	276.187	285.672	297.891	264.634	287.136	255.516	264.37	266.528	273.577	233.905	264.67	240.825	261.066	285.411	376.014	387.959	320.802	287.569	356.758	384.355	279.833	247.174	275.788	227.21	284.383	231.25
AKR7L	124.589	121.304	118.932	115.654	116.837	113.608	124.755	113.503	118.123	118.503	113.943	125.03	123.07	119.448	120.055	118.653	124.404	122.843	127.316	118.952	114.639	123.382	108.908	111.51	117.143	118.588	117.615	119.483	114.133	120.252	121.169	118.641	125.56	121.533	114.305	121.84	119.462	123.296	124.865	123.223	116.303	117.892	117.502	113.355	116.536	111.731	122.169	113.267	119.773
AKT1	1399.07	1188.16	1265.38	1363.38	1295.53	1311.07	1346.17	1310.58	893.217	746.3	1544.87	1301.83	1491.07	1523.66	1603.06	1262.43	1305.23	1539.31	1209.37	1346.17	1461.45	1677.83	1375.89	1439.69	1532.86	1459.43	1432.73	1112.65	1233.93	1582.34	1067.04	1400.28	889.169	1229.43	884.796	1314.77	1008.55	1231.06	1328.32	1245.05	1340.84	1827.25	1684.92	901.353	289.208	1264.9	1233.93	1503.65	1061.76
AKT1S1	126.81	125.924	129.356	131.348	126.368	134.237	128.626	137.967	122.19	128.232	136.503	143.477	128.603	133.634	136.807	141.941	125.726	133.582	143.197	142.843	134.257	135.773	139.306	142.375	135.642	133.215	141.291	131.663	136.254	138.904	126.913	135.458	142.434	127.388	132.605	138.871	131.15	156.555	135.121	136.758	150.342	133.061	156.456	137.982	129.047	152.945	132.109	131.182	121.879
AKT2	121.982	128.884	126.334	128.111	116.786	119.657	113.826	117.776	110.096	115.013	129.881	119.187	122.421	129.046	128.797	129.51	138.339	116.421	126.565	147.521	126.568	132.345	127.087	128.911	136.197	121.497	136.945	117.76	114.653	137.04	127.952	138.807	120.036	132.605	137.356	133.512	128.231	125.072	130.435	123.29	126.959	136.918	137.681	122.782	113.382	138.518	128.573	127.101	120.395
AKT3	138.276	140.292	136.118	132.728	136.103	132.039	136.302	126.981	123.996	140.047	137.209	133.082	139.392	131.64	136.091	138.896	139.966	134.533	131.411	131.996	136.163	132.592	127.836	128.533	127.202	131.36	129.742	120.624	128.908	124.75	123.137	129.595	126.504	129.759	129.84	130.612	123.484	131.821	129.497	133.963	127.43	124.242	122.921	133.047	133.729	123.285	127.033	127.018	126.659
AKTIP	816.311	775.156	818.813	674.051	779.133	710.204	810.97	738.227	942.904	1434.23	810.551	748.488	757.725	840.568	704.537	809.163	843.752	611.308	662.697	458.314	637.933	572.901	710.55	692.315	768.442	549.829	446.961	841.03	572.518	599.385	869.288	494.277	459.496	671.328	1000.24	724.761	748.293	564.547	781.899	640.514	566.191	451.554	337.449	890.647	861.069	708.76	569.994	639.37	458.608
ALAD	132.448	136.949	124.007	133.546	137.704	148.25	141.061	150.348	141.097	137.964	127.995	142.272	122.846	130.125	141.4	134.417	141.757	119.552	130.609	140.021	142.021	134.997	136.458	146.523	130.235	131.656	134.925	132.133	144.533	138.973	142.969	134.597	149.777	135.721	143.003	164.357	131.849	145.847	141.871	148.928	137.469	158.964	187.431	145.65	132.674	134.017	143.694	137.594	280.914
ALAS1	124.652	128.645	130.61	129.39	140.806	128.228	138.601	135.327	151.631	130.127	130.858	139.784	134.511	129.922	137.198	136.947	135.215	128.599	137.579	140.507	131.74	140.037	132.177	128.537	123.005	135.81	148.968	164.741	160.598	156.133	140.034	157.931	140.726	131.193	134.579	137.28	129.95	132.817	150.205	134.618	141.055	144.352	159.853	146.462	233.426	151.72	150.376	148.473	124.645
ALAS2	127.365	124.183	135.084	128.855	129.806	133.219	133.826	129.626	135.996	129.16	134.856	248.028	118.276	135.22	123.232	122.07	128.442	152.072	156.958	134.182	142.256	126.372	138.359	132.37	136.478	132.915	144.331	132.452	207.157	139.839	137.633	137.645	128.051	129.495	245.685	126.219	127.26	2555.59	128.831	161.154	1334.75	221.697	151.054	127.464	128.265	126.07	137.016	180.029	156.17
ALB	138.784	142.04	145.252	142.191	148.174	145.566	140.728	146.185	223.01	171.936	147.45	145.41	141.318	143.542	129.056	136.597	146.602	139.659	133.831	141.966	130.031	135.027	134.473	131.592	139.719	164.254	159.51	140.915	138.827	134.581	146.959	143.369	136.076	143.645	140.517	141.369	145.485	164.169	182.325	136.553	165.863	144.381	146.176	143.256	225.072	138.899	159.007	138.66	129.963
ALCAM	387.387	407.363	350.974	367.857	311.34	274.416	270.863	258.963	556.926	557.51	441.673	489.038	474.285	378.115	368.762	331.472	282.681	340.87	524.97	373.981	262.859	392.762	366.892	333.226	416.845	266.975	296.397	643.65	406.6	511.687	677.536	501.801	675.221	493.336	609.898	421.229	573.509	676.02	391.468	570.54	431.472	233.426	269.026	628.146	824.517	468.415	351.968	406.365	332.09
ALDH16A1	242.985	244.963	234.258	245.025	216.335	231.054	245.423	243.228	161.189	171.294	287.401	272.382	244.392	221.441	315.278	215.84	223.044	291.441	275.257	352.373	221.888	242.302	254.494	224.329	240.585	279.416	289.33	205.011	196.51	276.607	317.898	307.41	241.287	277.849	214.654	278.621	231.096	307.688	218.889	239.115	284.195	341.919	328.966	229.91	201.177	250.238	272.454	276.875	200.983
ALDH18A1	405.673	430.892	395.254	380.76	393.899	361.829	429.014	470.859	374.858	427.065	267.865	257.845	246.484	301.381	234.074	285.952	263.286	301.329	270.938	293.891	337.483	319.862	309.537	287.553	268.386	387.92	545.354	220.272	398.635	318.234	384.862	274.923	203.685	350.914	232.362	323.393	264.366	239.571	361.765	226.042	422.809	530.458	369.31	300.559	966.482	322.411	382.806	341.811	329.576
ALDH1A1	602.656	262.907	856.066	796.015	530.016	705.842	719.126	356.316	876.236	371.81	532.126	989.124	1169.28	1118.12	1098.78	781.247	996.083	792.515	873.985	514.668	618.285	1416.93	827.67	826.135	763.896	1256.64	834.533	1455.92	1394.02	1029.78	1106.7	932.834	1122.79	1464.7	1154.68	1125.02	1051.34	948.205	1019.57	897.731	792.241	625.835	621.923	1578.88	1249.63	960.513	670.72	1077.86	480.381
ALDH1A2	125.146	127.516	131.68	125.854	124.264	127.643	123.778	126.863	125.351	128.068	124.187	124.552	128.865	129.094	129.247	123.416	125.22	128.385	122.733	127.05	121.126	126.185	125.231	128.716	124.649	123.579	124.538	130.225	121.039	125.566	129.793	134.323	126.855	130.289	127.794	118.959	124.743	127.956	121.336	125.37	127.137	132.33	139.722	120.611	124.176	130.941	123.339	123.571	130.568
ALDH1A3	120.395	111.601	113.237	112.168	120.856	116.385	110.676	113.915	123.103	114.154	119.452	117.524	120.345	119.579	114.903	114.349	110.695	118.222	117.313	114.025	119.911	118.584	114.087	120.346	116.598	106.875	117.403	114.579	119.573	120.741	118.014	111.99	117.865	114.134	117.321	114.85	112.316	116.683	116.115	116.194	119.802	121.079	114.258	124.327	125.789	117.943	117.888	114.452	117.724
ALDH1B1	144.533	159.611	140.648	143.272	169.873	157.938	153.934	153.657	144.422	140.326	141.21	138.938	158.54	153.637	159.833	162.786	166.69	151.365	165.793	146.631	146.821	151.603	148.248	152.703	138.847	138.247	136.369	145.984	141.147	158.183	165.104	169.339	146.553	149.218	149.838	168.682	169.715	165.351	145.994	135.922	133.821	138.486	140.727	157.422	234.963	154.903	150.156	159.888	138.47
ALDH1L1	120.504	117.483	123.546	120.918	111.611	121.126	122.693	106.59	116.63	126.924	114.166	121.09	120.547	114.564	116.542	127.892	119.153	115.8	118.433	132.546	121.816	115.871	111.763	112.35	111.391	118.316	119.75	113.034	112.661	118.281	115.957	121.664	115.23	121.661	118.95	121.653	127.183	127.418	116.978	122.267	113.536	116.997	123.489	111.524	155.744	113.759	115.6	119.534	128.646
ALDH1L2	132.188	130.341	132.365	119.606	134.15	125.659	134.242	129.363	132.583	132.312	124.46	128.022	129.994	129	130.411	133.554	132.491	136.947	131.014	128.447	130.062	136.896	129.99	130.079	131.767	121.002	128.187	136.185	152.76	130.499	136.507	134.394	137.344	133.544	135.869	141.412	135.735	131.241	134.286	129.114	128.07	132.795	128.414	137.331	133.701	137.192	131.463	138.326	154.342
ALDH2	874.462	396.067	899.998	1307.21	714.733	881.153	725.241	621.772	1387.23	480.294	1173.3	1997.54	1613.68	1624.78	1259.19	1301.33	927.432	1313.69	1460.88	932.356	1425.28	1240.36	1516.04	1312.18	1462.82	2064.59	1657.73	2270.12	1661.89	2015.53	1335.27	1687.64	2155.75	1833.1	1244.29	1066.68	2117.27	1829.15	1454.01	1791.06	1614.37	1725.74	2916.95	2442	520.442	1586.04	1115.1	1274.16	1080.2
ALDH3A1	122.31	131.971	121.274	123.235	129.231	119.4	119.906	119.185	124.319	128.227	116.254	114.859	113.324	121.076	118.835	129.609	123.77	109.45	126.151	116.768	124.031	117.027	126.567	117.808	116.54	128.538	118.522	121.666	134.931	117.334	134.44	126.608	121.01	110.57	112.258	119.623	114.678	120.28	131.003	121.613	129.901	123.332	117.127	121.488	112.18	121.249	113.934	119.919	117.668
ALDH3A2	335.757	357.673	439.808	326.736	344.414	324.418	284.824	343.344	320.225	307.747	241.029	274.611	246.586	258.255	313.458	308.127	309.537	341.919	315.167	188.431	256.817	281.191	246.018	316.807	259.804	368.762	363.126	293.619	314.348	255.55	278.389	261.866	210.811	236.248	239.862	222.662	242.777	271.707	255.048	284.233	391.962	373.897	346.268	247.602	370.498	295.791	278.342	352.69	231.409
ALDH3B1	206.144	191.97	217.474	208.311	186.406	245.321	184.331	197.399	241.527	230.491	301.947	300.437	319.522	307.523	347.65	243.092	184.523	312.379	247.737	297.431	303.261	276.142	278.961	245.125	317.376	338.86	280.289	240.182	279.405	221.187	205.645	355.459	336.96	210.487	185.854	239.935	283.217	464.989	280.668	381.582	253.765	380.637	606.829	181.224	224.897	283.969	240.199	208.812	231.259
ALDH3B2	120.975	115.821	119.664	121.778	116.94	114.74	118.517	123.561	124.323	120.973	112.831	119.191	111.752	112.76	118.407	120.728	119.316	117.547	118.803	117.281	113.537	120.555	114.118	116.126	115.083	120.108	118.617	115.028	120.211	119.347	125.723	117.751	120.062	114.926	118.473	116.84	114.355	112.269	118.656	114.351	124.436	116.173	110.371	114.11	117.712	114.839	115.182	117.281	126.726
ALDH4A1	132.475	138.535	137.904	132.891	129.967	126.311	137.219	129.941	125.226	122.069	135.038	140.612	136.429	130.552	137.331	127.813	130.715	133.408	141.676	141.199	131.445	137.089	137.465	128.721	133.667	133.519	140.629	142.293	131.241	142.064	141.08	133.065	136.247	137.312	131.362	131.917	140.62	138.714	126.866	130.091	159.234	134.654	176.04	142.283	122.307	140.695	132.179	135.964	127.595
ALDH5A1	279.783	281.888	253.356	222.965	277.577	261.879	256.934	253.348	352.203	443.748	367.955	241.869	245.522	301.556	228.384	308.307	293.643	232.417	232.907	194.107	261.853	244.595	226.883	257.948	254.753	213.173	252.556	252.558	332.957	211.9	331.504	219.772	205.509	246.209	316.025	293.302	237.419	357.053	250.975	241.613	338.701	214.03	183.283	315.97	412.272	353.387	264.293	283.224	264.138
ALDH6A1	256.314	274.058	240.126	289.356	311.054	264.468	276.163	282.782	224.099	276.548	240.354	231.937	220.379	224.527	226.983	238.373	251.052	239.387	254.008	230.016	256.317	236.346	241.803	263.44	245.303	228.539	244.94	200.182	213.226	237.408	296.692	218.861	200.796	267.486	213.848	226.477	259.864	249.899	290.856	213.24	273.96	227.167	229.999	227.252	390.583	225.922	215.39	259.793	233.663
ALDH7A1	144.444	149.059	148.838	141.498	152.908	145.906	140.31	150.819	156.076	155.522	139.364	141.082	135.528	139.907	144.93	142.865	138.868	138.961	128.878	144.973	144.488	155.347	136.779	132.83	142.149	135.331	144.981	134.361	147.404	132.09	150.322	130.772	145.033	139.549	143.779	138.039	143.517	143.544	133.832	129.646	141.743	142.391	123.626	135.82	211.173	138.125	155.366	142.982	136.632
ALDH8A1	126.534	127.984	124.983	126.693	123.631	126.315	126.318	124.399	132.322	128.459	112.915	126.507	131.191	130.209	135.509	126.122	139.677	131.051	123.711	128.013	138.328	123.331	137.898	127.678	120.72	124.001	132.677	131.979	124.491	138.056	126.34	136.296	131.271	129.447	128.748	129.813	133.512	124.548	133.955	132.606	125.969	131.078	132.117	125.24	135.939	132.398	126.855	125.031	126.984
ALDH9A1	5315.88	5534.78	6424.32	5131.71	4486.9	4758.95	5348.79	4696.02	4057.21	4081.6	4242.53	3909.89	4043.86	4334.27	3899.8	5477.62	4633.68	4659.74	4412.25	2596.18	3618.15	4317.05	3835.23	4262.23	3976.41	5182.28	5348.79	2955.51	3744.66	3982.49	3386.72	3356.07	3122.67	4081.6	4188.51	4272.03	3827.42	3081.05	4014.12	3278.66	3793.22	4048.29	4232.73	3300.57	10642.5	5086.37	4458.8	4804.51	4440.35
ALDOA	946.672	974.784	1258.6	1138.6	1085.38	1233.73	1036.03	1172.61	152.622	145.522	1549.35	1996.24	1543.89	1571.82	1551.78	1240.19	1086.25	1612.15	1259.68	2107.16	1477.45	1045.17	1599.92	1379.55	1425.78	1673.9	1790.16	438.932	161.937	1771.49	1353.26	1970.01	1859.92	1385.02	1238.56	1656.21	1701.17	1572.77	2138.33	1825.62	2088.83	2343.03	3082.47	2142.12	141.105	1186.76	1455.47	1123.85	1238.99
ALDOB	155.011	142.623	142.018	150.543	152.867	150.835	181.439	165.359	119.187	126.446	179.833	219.275	165.514	158.702	181.421	143.038	148.12	164.463	165.145	149.034	156.923	178.163	148.939	139.247	157.413	143.229	155.64	142.654	127.174	160.459	184.84	177.195	161.631	163.773	166.315	164.667	145.678	129.901	145.788	163.548	143.097	134.376	148.256	156.996	124.349	162.312	149.04	137.581	132.478
ALDOC	979.883	1323.27	1287.21	811.599	997.854	1035.24	876.483	940.465	517.151	596.381	789.231	585.053	529.286	715.388	541.56	486.442	586.011	586.363	536.8	587.636	928.248	745.03	853.617	671.155	755.869	923.981	950.224	425.971	320.225	603.191	574.84	422.993	326.079	479.828	422.665	559.206	488.43	473.217	867.657	435.072	941.221	1405.99	893.447	501.703	1055.44	475.659	625.833	810.437	342.106
ALG1	170.118	172.788	164.667	174.012	185.934	169.464	171.908	196.422	121.369	119.512	176.368	169.727	168.214	194.184	200.468	186.367	190.358	177.402	178.543	302.37	183.929	165.383	204.303	192.539	170.391	208.753	201.707	170.846	124.028	186.549	190.358	181.308	173.509	187.561	189.214	219.059	198.144	200.499	208.468	162.536	177.312	205.815	249.154	182.992	129.361	182.761	172.855	184.827	164.092
ALG10	139.525	129.309	132.924	142.263	142.018	131.241	134.156	132.48	167.793	170.969	150.026	133.069	136.469	146.233	134.45	137.704	137.209	122.116	140.14	148.64	133.717	133.854	126.89	137.239	134.536	127.695	132.285	146.76	159.798	141.578	146.6	136.658	149.666	149.828	144.533	135.182	148.922	131.274	131.479	128.908	130.069	132.589	143.616	139.607	118.058	138.548	143.612	139.739	141.015
ALG10B	138.964	131.227	129.682	148.356	135.394	130.162	158.257	135.281	148.489	156.601	134.485	146.626	147.838	145.103	142.969	137.727	141.153	133.565	137.294	139.659	134.572	132.605	135.692	134.106	129.375	133.839	128.728	143.686	172.454	136.739	152.223	128.603	145.137	143.252	155.858	146.633	150.504	173.35	134.958	134.718	132.501	139.168	129.445	153.575	228.965	149.14	151.624	136.661	134.168
ALG11	212.25	202.008	199.128	199.863	216.636	178.59	208.167	205.78	250.798	172.008	155.841	202.634	169.6	219.249	173.717	240.115	282.571	208.495	297.908	198.825	155.255	207.305	179.368	191.363	252.915	167.139	186.27	187.534	163.972	165.82	195.163	199.871	170.155	285.863	200.368	227.272	222.499	216.23	169.403	173.114	159.82	164.873	155.04	198.728	158.146	155.696	194.027	165.974	228.029
ALG12	168.965	166.496	156.958	154.145	151.902	174.817	157.939	150.127	142.798	146.717	152.612	152.934	160.268	143.649	148.516	171.736	143.256	170.099	164.82	165.911	163.423	148.073	156.808	149.562	159.763	184.796	159.745	139.231	155.895	153.659	162.828	157.84	155.049	156.07	150.211	168.889	157.232	182.512	151.666	151.1	153.362	166.129	189.392	137.563	177.479	144.431	145.991	146.539	145.103
ALG13	339.496	297.038	427	333.46	377.718	455.924	426.068	457.129	369.721	318.209	304.92	308.537	342.209	322.92	297.62	364.421	340.327	289.415	312.851	352.848	350.031	311.947	359.154	334.805	381.064	530.375	465.185	391.887	482.718	453.596	323.718	341.733	343.678	352.879	371.32	350.807	427.699	383.486	433.634	398.879	404.385	412.056	631.335	417.367	618.413	343.431	395.316	414.164	431.367
ALG14	177.055	173.573	160.746	169.934	180.598	173.453	174.417	229.121	215.335	196.492	161.584	180.838	160.576	169.662	155.603	163.415	162.703	163.048	181.697	295.417	179.759	163.642	167.495	163.426	166.231	177.008	207.009	189.102	246.004	190.538	197.359	176.465	176.141	216.165	162.098	196.964	211.579	195.69	193.367	181.762	162.587	184.365	218.112	197.791	132.166	188.625	189.734	195.091	194.54
ALG1L	132.882	149.155	118.666	130.223	156.646	132.55	128.368	123.44	143.845	134.462	148.729	125.889	128.298	127.526	120.303	128.306	123.631	118.772	119.89	132.127	139.438	133.053	118.916	124.798	124.779	126.097	127.635	123.212	126.689	121.186	124.973	123.969	128.105	123.747	128.183	137.868	124.831	124.524	128.606	129.771	119.96	135.858	122.885	129.097	145.32	126.671	124.342	131.149	121.481
ALG2	139.784	133.182	142.644	138.625	143.417	144.887	138.63	160.455	140.442	134.108	125.427	132.388	133.969	133.998	139.133	139.567	139.839	134.117	138.121	164.704	136.299	131.42	143.396	138.328	141.938	139.742	149.703	138.122	156.453	133.437	141.967	130.289	140.536	140.052	140.458	144.118	138.667	143.035	131.38	134.651	132.711	148.643	158.507	144.18	224.106	138.398	136.273	143.028	129.448
ALG3	335.404	375.146	395.392	357.075	383.465	397.816	360.199	434.344	243.286	250.845	286.969	279.073	278.793	269.524	293.191	296.625	274.161	302.9	280.843	434.436	381.179	296.123	329.513	337.714	321.286	435.531	489.008	268.768	296.033	358.857	332.012	368.423	281.743	288.67	267.248	351.821	268.968	294.795	360.983	261.799	444.627	554.607	521.995	270.07	271.309	327.613	347.903	315.995	260.838
ALG5	622.09	614.574	559.292	507.388	698.969	570.329	547.753	686.788	867.114	999.049	756.035	731.206	639.45	674.428	528.401	670.483	611.619	541.25	670.325	850.297	598.061	700.061	626.562	611.465	648.157	497.498	555.533	669.574	619.115	608.617	918.694	589.432	650.459	688.735	700.061	696.072	893.217	904.639	717.811	600.657	438.846	405.196	427.313	810.918	2049.45	615.014	592.596	590.635	700.061
ALG6	607.315	542.803	531.61	569.833	517.268	412.844	529.14	560.125	730.615	1063.99	657.866	599.855	653.573	618.502	616.336	634.775	639.911	508.46	607.059	508.229	413.439	484.179	495.517	467.309	486.914	368.047	398.007	718.164	582.53	574.149	642.251	472.409	549.164	622.337	707.476	553.349	676.02	532.273	416.21	520.557	425.406	292.086	301.196	615.755	999.937	615.562	528.49	491.53	652.766
ALG8	419.486	372.464	356.69	403.3	449.74	343.699	411.203	398.352	494.055	511.166	430.25	436.589	451.502	436.589	381.016	399.209	354.714	300.274	381.799	622.222	321.636	359.071	421.519	349.281	352.857	324.824	340.521	445.247	552.148	356.189	447.783	396.419	383.134	399.336	427.83	484.468	406.517	381.988	362.82	320.752	286.714	287.836	271.286	408.615	349.798	405.759	329.622	381.557	494.556
ALG9	479.192	378.95	444.796	410.058	366.773	372.226	449.308	495.726	475.493	487.115	384.16	389.214	404.233	398.352	428.149	389.959	444.605	423.354	432.203	673.024	441.821	465.305	396.933	427.635	485.618	401.343	449.308	350.328	491.077	423.579	503.685	416.368	441.821	479.192	382.039	476.78	453.018	375.54	458.791	419.486	389.897	444.432	429.215	457.697	944.421	424.397	449.74	403.798	523.859
ALK	138.196	137.092	137.025	135.229	137.363	128.057	135.176	132.322	158.276	133.763	122.563	134.641	142.476	131.672	128.27	135.099	131.305	133.761	142.368	132.408	125.687	130.919	135.728	138.1	127.636	142.767	172.626	133.658	128.574	137.476	128.177	128.22	138.384	129.197	142.601	140.812	125.423	124.869	135.511	132.307	138.148	130.606	137.772	134.043	126.475	131.123	141.421	128.474	261.837
ALKBH1	273.984	267.597	266.697	259.884	278.193	257.51	272.342	269.571	290.673	298.62	267.353	237.77	281.913	261.927	260.045	252.334	276.988	222.382	244.963	236.248	216.507	224.149	215.958	226.309	236.567	239.029	243.578	364.908	408.531	244.084	280.595	260.944	228.937	209.002	287.155	242.007	243.264	192.183	231.942	200.394	222.117	257.012	280.171	259.226	154.393	307.891	234.88	256.848	282.562
ALKBH2	246.365	297.156	240.625	271.788	261.057	283.405	246.752	278.815	247.016	288.816	239.086	217.564	194.667	243.128	219.573	239.369	271.903	250.979	240.678	244.928	260.085	232.796	229.713	234.013	260.27	255.284	271.56	203.71	263.855	221.13	291.57	258.542	204.675	201.403	202.611	228.108	187.621	230.672	286.099	204.558	265.83	338.967	265.79	235.97	208.421	223.45	247.145	276.607	178.066
ALKBH3	405.139	434.286	418.394	404.611	458.876	434.973	428.853	445.247	474.443	577.513	451.825	434.973	362.329	390.887	394.048	377.712	427.478	401.175	431.223	488.062	474.285	445.168	492.597	420.276	444.18	422.665	434.456	340.121	443.041	416.776	507.283	411.669	417.223	440.85	397.27	418.776	541.25	465.305	467.708	371.224	336.211	408.531	408.123	446.772	292.086	419.085	359.712	428.938	347.085
ALKBH4	176.826	203.983	190.645	172.208	191.452	203.482	184.484	180.581	146.881	174.435	143.189	148.085	145.711	151.16	154.555	148.906	149.488	163.645	152.169	164.013	158.687	162.335	161.083	146.146	156.533	196.022	204.246	154.974	150.475	175.268	163.794	173.055	161.726	145.053	143.939	144.695	150.02	157.278	134.301	129.255	177.324	214.932	277.785	142.654	219.803	157.957	183.626	177.238	124.822
ALKBH5	6050.9	5716.64	6864.99	5822.49	5559.51	4804.51	6122.41	5698.02	4394.02	4592.74	5065.81	4576.33	4726.71	5477.62	5401.28	4646.26	5190.6	5751.82	5277.98	6184.76	5486.06	5766.41	5958.66	5235.07	5731.52	6825.73	6306.71	4048.29	5486.06	5065.81	4911.3	5567.62	3971.26	6061.22	5291.68	6516.58	4469.31	4843.61	5511.4	4360.65	5235.07	6676.97	6153.17	4671.82	3914.92	5998.36	5325.64	5637.9	5269.45
ALKBH6	445.247	497.201	495.841	479.514	477.667	530.695	455.923	584.911	248.167	279.724	405.831	429.766	378.331	369.237	365.293	424.301	434.709	464.863	402.693	357.873	581.639	419.936	383.898	422.11	451.596	552.545	612.322	265.985	305.345	501.703	514.21	440.959	320.904	476.68	399.485	425.134	438.611	335.191	468.675	404.611	496.316	505.801	635.065	343.526	580.434	394.342	469.266	439.29	299.881
ALKBH7	369.51	487.005	448.378	384.225	457.582	585.91	390.452	450.579	270.402	206.935	436.833	386.329	355.204	385.266	363.276	424.966	338.694	406.855	371.638	674.739	531.881	459.026	501.322	333.438	401.343	671.155	494.354	392.177	337.657	421.899	359.007	415.632	408.695	332.747	270.792	377.438	334.229	620.393	669.574	380.694	548.28	958.025	1002.84	371.97	152.13	424.142	325.138	465.644	287.708
ALKBH8	246.617	259.764	193.218	222.287	229.018	183.436	225.657	193.125	358.816	435.576	273.568	208.981	227.374	260.767	234.341	251.677	304.42	265.26	272.761	163.413	180.669	190.917	205.907	173.246	181.405	178.993	155.31	191.196	250.464	190.341	222.406	223.208	166.326	212.045	203.983	265.514	193.505	182.217	200.541	171.466	161.923	171.331	141.35	201.666	440.599	222.219	189.457	179.394	243.431
ALLC	125.902	122.149	123.66	126.166	115.017	114.928	118.038	121.962	118.801	121.429	124.614	113.051	118.517	117.319	109.29	121.195	115.179	118.933	113.891	121.7	117.677	115.554	118.318	111.971	114.232	120.166	126.577	117.974	113.186	119.021	114.84	117.904	120.439	119.876	114.996	117.656	116.305	112.535	116.32	108.476	125.074	117.222	123.047	120.312	123.713	112.732	119.117	120.005	116.551
ALMS1	202.331	223.382	203.407	224.384	186.281	184.379	208.71	175.257	170.505	209.387	187.397	175.733	185.216	172.725	181.502	216.089	202.096	198.629	174.829	212.304	149.578	167.621	178.617	165.172	171.684	167.633	172.96	145.601	166.686	176.618	180.179	184.255	165.114	174.942	180.974	164.209	176.476	168.481	147.769	155.148	173.604	147.69	132.571	176.853	124.619	162.455	160.243	162.995	142.669
ALMS1P	139.605	143.326	139.718	133.664	133.012	136.814	132.29	122.599	128.063	133.989	124.275	128.367	126.587	131.997	128.801	128.238	130.902	132.916	127.495	132.019	139.129	140.784	123.138	123.008	123.011	126.029	126.066	134.501	146.643	130.078	120.429	128.505	128.598	150.925	125.179	136.372	130.219	142.669	124.567	130.683	148.019	133.678	127.407	138.366	138.948	122.906	131.593	136.571	135.891
ALOX12	252.544	335.699	474.799	566.225	353.732	202.386	306.239	182.167	633.82	1423.44	496.608	561.129	353.189	426.287	446.415	260.519	316.213	418.916	511.372	224.271	462.279	350.089	415.987	330.44	295.321	304.895	280.52	338.76	293.992	416.845	208.316	147.636	1032.39	185.971	370.048	354.714	345.499	688.541	929.626	845.447	466.49	608.975	481.343	794.947	212.021	191.399	295.743	460.325	143.455
ALOX12B	116.868	110.116	116.309	125.441	113.817	115.656	121.115	120.342	126.639	121.056	126.273	117.693	109.96	128.486	118.87	114.745	119.667	116.408	119.045	126.843	113.286	114.021	128.745	130.446	121.743	114.79	128.272	119.428	111.556	120.664	115.441	110.736	115.438	121.028	116.249	118.902	120.26	118.876	115.213	113.34	116.329	117.522	112.877	127.253	115.641	118.381	110.811	118.305	113.879
ALOX12P2	121.631	118.166	119.122	124.061	115.259	121.704	122.629	123.693	120.868	122.936	124.727	122.234	132.143	116.256	120.519	127.172	121.263	124.341	123.181	121.325	122.028	121.307	120.637	121.511	126.823	119.758	117.273	116.244	119.417	125.047	118.314	131.115	116.185	114.536	124.377	126.213	119.722	117.307	121.906	129.075	120.281	118.437	123.016	120.402	122.676	125.269	121.378	115.483	121.031
ALOX15	128.56	127.699	126.822	133.196	129.254	132.933	126.91	129.417	122.65	121.199	126.926	124.298	132.882	133.594	126.509	124.978	125.561	127.029	119.223	126.968	122.333	118.838	120.298	124.315	119.926	131.232	130.724	127.654	129.85	127.21	122.834	127.28	125.01	124.411	120.454	122.183	127.307	129.351	127.24	127.862	133.071	132.11	131.081	129.297	122.487	129.11	124.604	125.448	132.247
ALOX15B	118.29	119.569	122.255	124.848	127.251	127.756	121.481	116.454	133.525	130.051	118.528	119.382	117.581	121.253	119.284	125.015	119.253	123.316	118.98	125.103	119.588	127.767	124.009	116.476	116.868	170.834	165.334	128.136	121.408	152.889	131.45	139.352	140.639	129.469	124.54	131.939	150.262	171.17	128.852	140.758	125.233	139.548	245.458	150.364	123.208	138.788	134.597	121.816	134.132
ALOX5	140.165	126.018	143.669	136.39	134.8	126.798	128.235	137.057	122.541	139.759	129.383	121.446	131.709	128.599	136.621	144.468	133.071	131.621	134.024	137.556	132.441	134.929	125.661	135.821	138.167	156.221	132.776	134.218	129.159	131.749	127.285	136.814	149.13	139.528	136.8	141.952	141.379	133.949	129.991	131.019	151.148	143.477	162.898	138.769	137.982	130.101	137.81	139.097	126.441
ALOX5AP	5897.15	4898.9	5190.6	5776.13	6662.26	8369.32	6263.01	6516.58	6306.71	6566.06	5854.25	8478.36	6089.45	5667.44	5559.51	4790.53	6688.72	5918.13	7751.98	3954.1	7309.35	6204.38	6915.31	6791.1	5308.84	8295.36	7923.32	12045.2	4683.97	8107.5	6031.42	4886.03	5315.88	4292.44	3867.34	5300.59	8217.85	8011.98	7235.08	11399.2	13659.6	7268.29	8784.17	8558.27	9275.65	7535.91	13385.2	6194.07	4560.47
ALOXE3	128.36	122.055	126.549	137.096	128.559	132.857	132.025	132.401	143.979	125.428	121.664	141.76	134.519	120.637	131.712	136.071	126.822	145.094	127.425	135.364	122.168	123.227	130.431	129.423	126.412	129.967	133.64	130.348	131.47	127.596	126.073	119.03	112.568	119.787	118.691	135.488	119.881	122.303	128.166	123.257	140.414	138.305	138.056	126.572	143.185	131.241	120.039	124.374	137.735
ALPI	126.972	127.251	127.505	134.312	124.252	129.893	129.284	129.126	127.225	140.671	142.049	146.725	130.535	133.186	139.459	131.462	141.4	134.456	138.55	133.047	134.561	140.924	125.291	126.228	146.647	134.021	154.452	126.25	141.568	135.662	135.199	139.599	132.538	127.648	132.294	138.109	131.115	142.249	138.83	154.415	170.266	129.841	130.751	123.235	144.649	143.806	132.916	131.294	117.68
ALPK1	251.008	254.807	291.182	372.325	223.886	415.987	220.932	262.898	359.712	351.161	327.702	518.388	458.036	258.388	278.983	263.613	276.244	297.382	330.389	198.399	216.089	287.267	248.839	255.317	263.323	280.673	261.77	677.378	465.379	390.947	348.014	378.695	358.507	242.935	345.846	282.3	380.622	306.897	247.632	444.18	496.909	255.877	313.409	421.297	507.719	367.221	1037.14	336.691	311.79
ALPK2	131.078	116.016	130.42	127.482	121.489	130.644	113.692	125.983	137.447	132.793	118.631	142.871	133.652	125.073	133.955	121.009	122.887	137.61	166.058	127.996	142.224	116.4	128.589	116.85	127.802	124.887	121.477	121.223	117.079	138.826	127.303	136.298	117.688	166.38	135.028	130.631	130.481	117.249	131.138	135.081	120.345	121.645	120.299	128.435	190.624	126.818	117.683	127.443	115.64
ALPK3	126.258	117.376	133.743	119.665	113.327	118.26	131.759	117.21	118.209	119.988	125.784	130.988	135.356	127.595	118.134	120.423	121.051	119.051	120.507	121.308	129.712	126.244	121.618	129.041	128.625	126.981	117.549	130.58	120.554	118.198	119.96	141.68	124.852	121.465	122.09	130.881	126.311	114.362	118.327	130.315	121.65	124.991	126.055	118.943	120.091	123.618	125.533	126.432	121.549
ALPL	152.959	153.769	140.453	201.177	188.536	2324.3	273.11	362.82	167.711	196.164	168.7	242.84	1330.75	297.235	144.422	551.051	440.776	150.939	681.431	141.536	165.902	589.695	151.672	201.802	280.05	451.409	408.46	1573.45	132.554	411.747	166.394	180.713	289.131	163.228	189.852	157.67	1146.04	337.598	356.378	1656.94	974.747	514.819	580.891	306.751	165.383	492.5	8158.67	602.105	117.515
ALPP	3291.87	3705.59	2724.17	3740.57	3509.83	4017.97	3867.34	3445.38	3717.91	2271.73	5357.76	4822.81	4804.51	4068.31	4099.25	4696.02	5602.6	5410.5	4714.11	3265.85	3379.48	4690.06	3221.6	3771.72	4038.87	1955.12	1840.86	2597.89	2282.28	4120.42	4509.33	4350.13	5125.58	5928.62	4344.48	3470.14	2627.67	2701.42	2708.11	4266.95	2545.35	1826.19	1008.55	4970.18	4701.48	4924.3	4746.94	4989.64	3863.77
ALPPL2	141.724	124.635	122.717	124.068	123.462	127.737	127.212	121.874	129.275	122.8	130.64	131.912	137.639	123.85	139.137	134.649	135.862	127.467	119.384	108.856	136.685	139.228	133.304	132.251	129.986	118.631	123.733	125.637	128.526	130.744	136.212	133.319	123.662	124.12	119.018	136.71	119.516	128.505	124.02	128.192	147.38	140.208	134.09	129.979	129.818	126.295	137.879	131.967	126.363
ALS2	472.686	371.97	560.125	411.985	368.435	353.985	422.593	319.439	528.604	506.487	373.441	369.626	388.348	325.8	408.695	365.907	510.389	372.98	422.529	233.053	348.869	313.348	338.372	433.898	372.399	333.226	346.984	504.071	366.321	330.491	276.74	413.732	324.876	358.317	325.689	335.191	324.103	282.212	299.881	336.477	350.042	269.955	332.974	372.664	755.323	316.109	340.121	360.78	376.694
ALS2CL	118.115	125.423	122.256	127.479	117.33	125.538	120.064	124.484	111.915	121.876	122.742	120.692	120.851	124.257	130.778	121.887	121.761	119.957	116.479	123.203	126.768	121.697	132.154	121.154	121.691	118.946	123.918	129.252	120.118	119.443	120.504	118.461	122.239	120.99	125.502	119.192	123.213	130.231	120.639	119.288	121.215	123.314	121.832	126.023	126.459	126.523	125.502	123.617	114.638
ALS2CR11	113.707	115.62	108.441	122.086	115.276	112.646	117.081	114.996	120.113	114.398	113.322	110.323	112.019	118.434	115.875	120.575	115.276	124.775	109.161	125.63	113.313	117.157	112.317	119.96	110.153	119.734	118.745	117.719	118.331	125.542	117.503	119.433	111.346	116.843	116.678	110.141	112.547	117.954	124.42	114.821	115.158	119.847	116.726	113.968	117.276	116.768	114.647	121.626	112.714
ALS2CR12	116.019	112.658	146.091	115.674	122.573	136.034	130.306	127.645	141.66	141.598	121.054	131.047	124.93	132.807	126.384	120.554	130.634	128.836	129.298	131.982	120.047	130.74	122.297	134.764	127.288	125.951	121.645	114.005	128.06	132.117	122.889	129.748	113.453	124.642	140.134	130.179	120.34	123.617	116.287	131.883	130.148	122.1	118.667	139.463	124.28	117.311	125.964	125.42	148.911
ALS2CR14	291.859	263.493	291.387	285.189	328.592	429.766	341.694	326.301	250.799	215.162	299.514	247.632	278.342	284.233	308.771	288.411	280.793	364.105	265.91	242.537	301.196	308.92	262.303	353.189	349.74	279.294	283.08	230.103	234.67	452.945	299.965	328.2	299.373	421.519	247.512	323.081	255.782	237.619	280.171	346.569	285.866	260.16	238.392	309.976	478.045	276.208	624.348	535.153	254.841
ALS2CR16	193.905	177.963	180.783	172.831	140.313	149.568	180.74	144.596	229.214	292.972	168.012	175.667	159.321	151.223	167.863	168.273	179.061	164.8	174.593	161.941	151.943	168.719	158.936	158.867	163.559	142.095	174.327	166.252	172.664	162.21	188.794	169.209	162.192	193.964	204.604	157.608	156.4	153.769	165.451	153.695	130.565	132.964	137.274	170.344	402.076	176.46	182.326	180.541	129.006
ALS2CR4	208.873	203.526	182.667	222.837	223.099	171.798	214.543	228.965	276.916	248.876	173.707	166.183	178.489	201.547	199.08	171.507	190.917	185.281	177.994	205.416	186.842	166.96	174.5	235.97	178.117	150.925	182.043	214.982	257.32	219.208	194.707	180.076	191.692	214.149	237.105	214.411	250.175	164.186	208.981	160.708	161.98	191.196	146.146	233.521	236.187	197.362	193.105	194.274	179.927
ALS2CR8	161.726	155.324	165.654	158.041	160.074	138.826	145.83	145.609	199.856	191.25	178.409	161.594	165.785	179.049	162.565	153.567	177.835	169.813	159.058	145.449	164.051	136.703	149.355	136.911	137.023	136.61	128.066	139.146	156.601	141.604	166.193	142.82	171.005	172.725	200.278	159.49	184.924	160.806	144.744	154.813	132.412	123.601	118.733	166.96	122.486	166.012	137.709	136.839	143.204
ALX1	172.208	175.816	244.895	181.369	175.109	172.488	186.487	181.598	143.283	185.182	157.269	163.155	164.749	172.762	174.302	161.854	158.59	172.304	159.918	184.042	213.594	179.284	179.462	182.584	190.324	207.996	235.215	155.699	160.459	169.31	157.526	176.76	154.27	158.214	169.545	189.089	156.456	183.708	178.839	204.282	200.239	236.629	245.962	184.303	200.374	158.98	163.174	164.272	174.642
ALX3	127.792	123.006	125.138	131.274	127.913	134.867	127.462	128.697	126.041	126.107	120.22	123.255	123.284	124.231	128.95	121.294	125.705	125.984	124.701	124.278	129.245	120.134	125.915	125.227	124.493	129.338	128.534	119.955	116.237	118.57	127.208	125.967	121.673	132.317	124.373	126.588	118.795	127.093	124.176	122.739	134.173	132.35	125.328	126.004	131.168	130.381	131.013	132.171	126.007
ALX4	115.753	111.01	117.64	116.124	116.724	121.98	111.325	117.538	113.526	122.883	118.306	115.137	112.487	113.885	119.353	112.55	125.62	113.818	109.054	113.126	112.847	121.644	113.863	120.216	111.315	120.405	109.472	114.193	119.646	117.292	118.533	119.081	123.527	116.837	112.859	118.288	108.056	120.366	109.567	113.596	122.543	115.916	123.266	120.041	118.77	114.879	112.883	115.224	140.429
AMAC1	116.034	117.955	122.295	123.876	116.12	120.954	120.408	131.625	116.098	109.536	120.575	117.367	119.622	120.593	120.439	126.14	122.87	120.565	120.427	122.49	129.527	124.942	132.916	120.467	115.624	125.808	123.13	119.581	127.201	128.818	130.434	127.503	123.228	119.689	112.475	119.345	118.477	124.066	126.921	130.866	124.909	121.552	126.69	121.408	119.21	120.62	125.891	122.802	123.072
AMAC1L1	112.54	121.113	134.925	117.147	122.257	121.686	126.19	117.838	120.297	119.548	122.353	124.882	133.502	114.076	120.562	132.166	137.218	130.681	127.968	122.631	116.118	127.567	125.841	119.504	123.812	124.417	133.613	125.616	109.173	122.208	126.831	123.636	125.282	120.841	122.927	127.48	113.215	119.996	116.144	132.277	130.22	136.449	130.229	118.791	118.071	125.543	120.635	124.632	116.739
AMAC1L2	131.441	129.1	130.546	126.539	132.981	127.027	142.585	134.163	136.246	129.12	129.02	129.837	124.294	130.983	130.714	130.829	127.865	125.281	125.278	127.497	125.926	124.741	121.141	125.894	117.624	126.642	132.129	119.98	128.708	134.706	129.234	130.276	120.644	124.987	128.175	126.794	115.532	122.278	125.138	129.866	134.602	127.447	132.922	128.479	127.515	123.721	124.088	129.028	129.381
AMAC1L3	150.354	148.928	154.459	160.117	151.713	156.251	141.404	154.284	139.871	150.494	148.749	142.455	135.267	142.498	147.91	156.996	136.019	136.227	144.67	139.208	146.788	147.675	154.705	151.105	161.145	181.802	158.119	152.593	144.314	151.57	147.68	155.669	139.622	138.896	142.635	153.835	135.369	161.467	150.488	139.528	161.065	159.637	158.621	138.214	190.586	149.057	145.911	154.125	125.658
AMACR	166.553	168.481	165.676	166.648	147.23	168.481	165.711	146.566	130.903	141.3	153.567	147.162	174.327	165.005	159.548	166.648	164.445	152.797	157.09	142.552	156.815	144.169	152.136	144.717	153.393	151.082	139.733	173.753	141.424	153.901	144.458	144.052	156.346	155.851	168.953	148.398	165.045	132.802	135.646	140.539	145.125	136.139	139.4	172.316	141.701	144.541	150.849	158.35	153.575
AMBN	121.391	120.111	123.233	121.555	117.395	122.837	116.294	126.729	127.096	115.827	121.948	124.441	123.954	120.296	122.008	117.397	117.632	116.925	119.495	120.624	119.589	124.166	119.83	122.49	124.002	121.602	120.252	125.009	122.192	117.469	119.713	122.192	121.433	119.429	121.862	124.708	116.198	121.02	122.785	120.963	124.28	120.437	123.356	118.793	129.344	124.024	118.14	119.521	125.746
AMBP	120.064	126.847	122.049	126.041	115.859	120.499	132.708	128.848	119.298	118.377	118.725	132.29	118.341	121.663	119.399	120.761	113.887	119.147	114.957	125.374	119.76	119.977	110.48	120.456	118.295	122.332	124.582	120.574	122.345	124.85	117.713	118.517	120.835	119.346	117.9	117.683	130.601	133.24	122.475	123.782	119.447	120	118.451	113.868	131.686	120.103	127.529	126.244	122.899
AMBRA1	136.069	131.346	135.795	141.226	133.63	133.995	133.65	135.1	147.264	138.635	132.69	138.951	133.352	141.49	137.893	135.884	130.486	134.348	145.922	157.807	139.599	146.985	141.011	149.046	140.169	131.169	137.198	135.587	141.379	139.662	148.437	140.31	140.152	144.649	137.331	141.66	138.588	140.563	137.645	135.445	142.206	164.435	131.131	131.023	127.547	138.938	149.978	136.543	142.57
AMD1	1040.83	1065.03	985.452	1007.06	918.881	828.95	1038.97	816.201	1117.53	1319.08	835.889	818.315	1107.35	954.331	950.053	1056.24	1004.77	918.658	1138.03	659.377	988.7	1004.95	1068.44	1138.29	1059.08	885.968	934.64	1044.7	877.927	916.418	791.898	804.411	1086.84	1272.09	1149.98	922.538	1293.38	1205.51	1018.48	1610.84	585.972	711.646	586.747	1029.44	615.99	806.687	845.771	845.037	979.846
AMDHD1	182.557	185.9	173.817	183.102	188.484	157.421	159.321	175.323	196.748	219.321	185.696	148.888	178.147	163.33	171.76	192.723	170.559	151.535	164.22	149.573	153.864	200.983	156.903	166.836	163.071	180.349	188.379	164.123	207.976	184.484	181.322	159.928	167.025	183.742	153.596	170.758	170.93	157.814	148.467	160.397	164.22	144.257	153.652	189.869	394.89	193.071	163.968	172.376	134.348
AMDHD2	215.432	248.113	207.184	203.245	216.456	235.556	211.645	235.868	163.802	162.395	186.582	209.743	218.01	169.613	207.751	198.959	190.011	217.583	220.369	236.066	219.391	194.467	180.288	194.864	190.809	218.484	216.28	204.09	198.49	192.595	246.45	244.664	179.448	177.654	196.555	202.492	199.822	256.646	230.405	200.96	218.765	267.865	260.698	182.217	121.34	229.487	222.146	176.035	285.189
AMELX	124.673	119.673	117.68	120.323	116.84	117.771	117.962	115.974	118.695	124.186	122.702	117.148	121.565	123.627	118.669	122.426	117.163	124.856	112.062	120.406	114.375	124.313	117.408	115.156	114.718	118.478	114.534	118.275	122.924	112.36	125.945	115.763	116.385	113.12	115.545	124.04	122.838	120.621	122.877	120.554	122.238	121.82	116.732	114.827	121.125	124.456	116.245	120.69	139.673
AMELY	125.21	133.317	122.79	115.177	121.434	116.749	125.555	125.37	119.446	124.187	127.486	108.316	122.53	122.473	122.582	117.098	120.445	125.93	119.572	125.89	120.124	121.453	126.929	124.862	120.83	119.289	122.7	118.13	119.456	124.41	120.708	114.549	112.844	122.633	121.649	120.119	122.387	120.412	122.934	117.849	127.486	126.144	128.166	118.104	129.669	115.344	126.354	126.429	119.132
AMFR	562.365	435.074	581.676	597.414	486.481	375.749	547.763	403.275	310.651	257.922	467.892	300.567	354.841	617.626	282.711	480.345	439.692	585.717	575.229	570.319	512.171	420.459	377.923	563.969	497.589	583.269	565.67	566.998	469.121	659.72	487.87	372.714	411.203	581.356	283.847	454.315	539.564	616.471	542.76	502.943	554.077	680.421	725.705	552.902	182.141	567.584	389.862	342.704	353.334
AMH	120.497	112.432	111.676	111.225	112.132	116.998	111.105	111.902	115.895	109.893	110.382	115.767	118.136	121.117	113.84	112.539	116.101	112.423	123.324	113.733	123.776	116.327	109.515	112.568	115.138	107.987	107.876	115.824	112.576	121.985	119.203	116.376	110.681	123.763	123.895	113.091	116.951	120.609	113.52	119.721	115.238	112.816	129.708	113.758	117.695	120.002	112.697	109.45	110.649
AMHR2	116.653	119.212	122.344	118.114	124.757	108.967	118.982	122.123	118.328	122.739	123.46	122.205	110.758	113.281	120.41	111.819	127.365	115.666	116.781	112.533	115.745	108.69	124.496	113.286	122.086	117.99	115.16	121.528	120.267	118.041	124.135	115.344	156.296	117.603	115.117	119.931	125.367	118.818	116.37	125.865	129.109	118.131	127.114	138.622	194.434	116.262	126.847	134.566	121.214
AMICA1	2186.85	2016.69	2304.93	2788.22	1782.92	3349.02	2179.07	2184.21	1732.52	1980.92	2231.99	2886.81	3316.79	2306.33	2899.32	3030.19	2103.19	2637.72	2564.98	2713.61	2261.62	2737.18	2349.37	2215.69	2193.97	2795.6	2119.81	3436.63	2252.66	2371.34	1942.48	2753.98	2188.25	1787.36	2897.29	2101.82	2230.31	2205.96	1410.49	1785.67	2558.93	2242.47	3491.23	2028.65	219.232	2578.3	2955.51	2104.36	2044.82
AMIGO1	145.246	156.035	139.938	137.727	143.686	141.927	148.137	131.52	140.726	165.27	135.174	138.357	141.255	130.135	137.347	144.55	136.668	131.51	145.844	137.484	136.925	142.424	138.925	133.073	134.075	134.503	143.307	148.911	132.912	133.041	145.876	145.632	131.496	138.951	142	135.033	124.183	132.068	137.242	130.501	134.271	147.047	125.709	138.077	121.571	147.401	135.014	143.367	127.588
AMIGO2	118.676	124.944	120.543	123.345	131.841	122.024	128.533	121.368	121.331	117.442	125.759	119.794	123.211	129.694	116.95	123.481	119.615	124.923	120.505	125.325	121.897	115.42	120.95	119.023	122.506	121.995	126.587	130.34	127.923	125.214	128.097	119.8	130.878	125.132	124.808	120.769	119.371	115.434	118.902	116.07	132.122	125.623	131.414	130.575	115.702	122.395	126.146	129.94	139.228
AMIGO3	122.731	127.09	118.882	125.472	134.637	127.891	115.196	125.549	120.101	128.639	119.119	121.272	117.266	128.345	120.63	126.054	118.803	121.276	114.64	135.006	121.69	120.509	124.509	128.697	116.57	124.439	130.195	121.948	122.439	120.729	128.803	121.74	124.088	127.028	111.964	120.681	119.536	126.77	117.981	117.899	124.435	124.264	123.444	126.162	133.861	125.549	116.295	118.196	127.52
AMMECR1	201.38	192.523	199.474	205.36	195.643	172.725	194.027	197.979	193.392	292.51	166.441	154.512	165.961	173.285	179.942	179.958	180.713	173.258	202.349	216.135	187.067	177.696	217.704	225.856	206.776	169.813	182.186	146.683	163.615	179.912	159.109	159.518	188.502	199.693	177.726	183.225	161.864	154.52	186.383	193.942	162.365	168.432	155.423	178.298	208.212	168.878	171.202	170.93	147.312
AMMECR1L	292.881	308.169	292.733	287.236	289.208	274.745	307.231	280.391	394.407	456.086	317.481	279.68	283.76	312.2	307.498	359.376	333.497	313.048	356.62	149.391	240.796	261.247	247.537	304.462	256.225	231.156	247.565	341.919	377.982	275.257	305.629	327.897	209.85	250.591	321.966	275.669	240.796	254.59	270.102	226.929	230.212	219.519	243.291	311.385	752.025	354.487	281.643	300.837	328.745
AMN	121.789	122.566	125.016	122.143	129.894	125.257	117.148	128.858	117.434	116.648	113.417	128.152	123.24	130.66	120.283	121.445	114.476	118.202	124.895	121.966	126.529	115.529	118.815	119.918	120.457	123.533	129.353	129.416	123.216	118.094	113.051	120.828	123.087	131.15	127.791	117.982	125.131	131.036	127.621	125.307	130.274	123.491	130.022	129.509	140.906	127.403	127.467	129.363	114.76
AMN1	197.254	192.333	198.549	161.642	176.035	164.292	188.554	166.213	315.627	330.233	202.294	180.455	198.511	214.338	202.881	217.865	210.623	184.019	201.296	179.833	178.81	213.875	210.134	189.839	237.242	151.909	159.352	260.559	200.452	180.001	261.955	191.413	300.559	208.316	270.829	216.874	228.188	244.514	231.461	211.713	132.019	157.807	128.303	248.028	464.336	240.625	245.39	200.862	178.272
AMOT	254.655	220.762	184.172	196.894	207.931	198.033	222.939	209.422	231.125	318.745	173.411	167.698	199.405	198.806	234.67	224.676	227.155	203.076	211.442	160.834	213.361	184.406	199.118	200.541	171.908	204.113	153.226	168.902	185.455	152.593	177.043	181.351	146.168	170.201	185.813	174.221	175.23	164.749	161.932	144.94	160.083	148.473	150.224	157.684	135.379	196.109	144.28	159.222	159.14
AMOTL1	123.092	125.582	125.983	127.163	126.961	123.05	117.901	120.919	125.694	134.883	130.773	127.426	134.444	133.001	130.172	132.139	129.396	121.347	121.355	125.115	122.2	124.187	112.612	123.615	126.831	118.748	128.569	122.896	128.546	127.603	120.555	133.104	119.847	134.775	131.041	123.141	129.081	137.379	113.22	131.563	129.867	123.268	120.071	125.486	135.662	125.045	129.04	122.442	118.198
AMOTL2	198.629	211.885	191.301	190.645	218.333	228.69	199.77	196.714	190.426	191.196	200.563	208.359	204.32	216.36	206.611	207.642	234.484	203.548	174.656	172.639	278.061	249.124	203.817	192.886	225.497	195.353	180.258	188.094	211.865	194.83	182.373	185.116	169.588	180.669	177.882	191.009	189.904	224.516	173.778	179.357	186.634	185.44	164.87	197.102	335.699	214.543	173.851	184.648	215.815
AMPD1	120.101	107.811	116.577	113.157	119.53	121.265	107.319	118.433	121.446	125.29	116.095	123.93	125.159	118.221	111.14	113.641	121.949	107.82	113.698	117.999	119.264	120.01	116.255	119.965	113.283	109.715	121.159	120.986	135.624	113.576	115.415	115.186	119.969	120.753	110.02	119.171	119.578	110.674	111.538	115.602	112.517	110.096	115.772	110.327	175.019	113.043	120.379	117.251	113.355
AMPD2	114.596	113.499	115.994	116.271	119.569	120.739	111.014	114.355	113.637	111.78	121.946	119.278	119.95	113.11	123.393	114.707	118.026	117.007	117.339	123.58	112.306	117.626	120.041	120.956	120.064	117.575	118.932	113.525	114.132	117.281	118.977	115.304	116.622	119.202	115.114	115.74	114.685	122.624	119.299	116.721	109.966	111.964	118.536	116.609	116.797	115.135	117.876	117.906	111.934
AMPD3	128.848	133.596	125.936	129.414	125.219	127.092	128.615	123.107	121.687	128.353	130.492	126.942	123.723	129.764	129.413	124.478	130.919	120.764	130.886	122.263	124.377	118.311	129.212	123.537	120.727	136.685	125.216	123.083	129.858	127.241	123.84	122.506	126.774	122.954	120.382	126.283	131.397	128.68	130.741	122.462	137.03	129.783	137.527	122.411	121.955	123.358	131.623	124.732	123.895
AMPH	134.039	120.559	124.321	124.946	119.128	125.732	128.894	126.156	129.99	128.523	130.026	124.221	117.442	120.85	122.654	125.473	119.152	126.641	122.767	124.297	117.662	122.327	127.131	119.588	122.582	154.742	257.225	136.868	130.937	237.33	127.206	134.983	143.139	128.704	121.057	128.275	153.427	211.184	125.127	240.901	129.092	127.852	306.35	153.787	114.484	174.611	154.831	121.835	139.889
AMT	625.498	522.441	697.469	649.086	553.837	495.425	624.613	487.866	448.295	765.237	577.751	490.679	486.914	448.642	619.237	640.165	652.907	605.438	530.331	326.574	534.473	467.514	442.218	404.233	443.113	556.614	560.873	337.708	334.128	597.172	558.009	754.934	555.881	656.4	496.411	458.297	371.568	286.838	423.735	477	455.923	434.376	375.785	458.957	424.079	585.422	457.582	501.703	437.7
AMTN	113.091	117.053	110.777	113.772	107.947	121.534	119.716	120.864	123.093	119.448	111.424	108.972	117.815	111.389	111.374	121.699	116.069	117.987	113.422	111.776	119.109	121.58	124.677	109.619	112.187	113.467	116.952	110.728	114.558	117.622	115.292	117.674	114.042	114.348	121.049	121.152	115.875	120.333	115.144	122.201	120.82	112.51	123.146	124.499	118.815	112.905	113.248	110.905	113.332
AMY1A	120.803	122.616	123.273	114.231	121.227	123.131	123.255	114.656	133.75	126.443	119.17	128.571	120.952	122.792	129.044	122.906	130.215	117.34	126.431	117.553	127.058	122.94	130.398	123.104	127.492	125.935	120.181	128.629	127.403	122.553	129.081	129.025	119.824	118.177	123.029	113.728	122.701	120.179	118.145	123.402	122.665	124.446	120.188	121.763	117.654	122.457	123.353	114.624	136.409
AMY1B	192.446	150.013	182.069	160.48	162.437	151.72	157.662	152.025	132.384	134.383	193.85	159.696	180.425	189.998	182.681	206.717	190.144	191.196	180.814	168.821	158.508	147.239	164.573	176.72	196.855	136.782	144.533	150.991	130.131	170.547	168.953	154.056	210.178	200.906	234.179	216.789	207.381	136.628	161.585	181.754	141.261	142.147	130.511	195.094	153.399	184.359	165.315	157.05	157.387
AMY1C	4248.37	4982.78	4592.74	4640.75	4732.69	4522.23	4790.53	5446	2774.8	3362.54	5418.93	4344.48	5008.84	5284.55	5519.1	5375.35	5551.28	3555.88	5446	3365.76	4911.3	4509.33	4952.05	2594.65	4626.92	3846.96	3736.9	6240.03	5300.59	5751.82	6061.22	4586.24	5874.26	6740.23	6061.22	9472.55	5716.64	7045.18	5300.59	4965.58	4228.54	4586.24	5688.47	7383.45	467.976	5366.96	4232.73	3427.38	7309.35
AMY2A	126.569	122.569	128.58	122.173	122.932	132.572	127.916	127.666	125.424	139.509	130.544	133.854	127.263	118.572	132.7	130.131	125.722	137.082	129.722	128.271	138.53	131.273	119.713	138.982	131.202	124.602	129.414	132.169	120.619	131.035	129.483	127.878	126.523	130.186	132.707	131.004	126.291	127.185	128.327	128.947	133.709	128.201	124.336	129.271	145.51	129.619	131.358	134.001	140.105
AMY2B	230.682	187.002	223.35	202.124	191.884	170.893	195.323	163.164	269.318	291.041	249.929	236.971	264.288	221.02	223.447	280.085	249.796	207.259	235.832	172.343	231.429	222.412	217.133	252.533	288.016	163.531	160.95	249.891	173.6	218.707	270.739	246.143	306.703	284.08	327.683	282.123	297.732	208.945	252.387	257.573	146.299	146.049	127.831	273.183	596.208	266.314	208.353	232.25	179.568
AMZ1	116.155	122.693	115.903	114.468	124.291	126.32	118.614	124.38	123.946	115.459	113.57	118.317	120.507	128.643	116.826	116.463	120.626	126.609	119.78	115.841	117.734	115.596	116.614	123.165	125.713	114.501	117.442	118.168	115.498	117.469	119.471	120.978	127.231	112.385	127.041	120.957	110.426	131.23	115.865	113.316	115.853	117.378	117.447	122.213	132.656	122.628	123.597	126.965	114.887
AMZ2	1267.09	1293.81	1213.57	1112.17	1264.42	1001.48	1258.13	1388.63	1477.21	1522.48	1193.54	1041.45	957.782	1130.01	1042.38	1209.82	1263.3	1040.71	1048.63	1401.66	1197.98	1055.28	1131.71	1029.88	1190.46	976.207	1144.94	784.629	1197.64	1162.24	1354.93	1021.08	991.961	1220.28	1011.12	1308.12	1213.42	926.335	1299.74	1022.85	876.998	902.612	811.339	971.692	646.014	1139	853.678	1000.82	1062.33
ANAPC1	385.06	365.478	365.544	424.397	410.347	458.471	531.61	464.05	489.172	483.812	349.866	459.19	467.887	487.65	517.986	514.917	493.336	519.88	469.603	565.744	498.496	605.018	517.798	597.924	562.741	379.434	410.696	436.07	480.971	420.503	482.759	453.283	451.668	595.379	494.454	526.895	516.353	414.58	414.501	465.032	379.675	385.619	321.905	544.479	153.116	501.422	445.488	349.092	529.706
ANAPC10	411.128	412.132	362.329	395.316	475.937	399.85	396.553	469.871	576.85	481.531	359.071	381.487	393.832	450.666	398.13	441.901	436.687	385.911	419.139	295.173	460.837	382.669	466.216	463.549	395.484	400.683	410.618	454.897	507.719	496.5	408.788	410.058	364.389	394.342	469.188	437.004	490.679	398.199	436.431	425.406	325.847	369.31	363.972	463.862	846.18	414.95	358.635	451.409	433.278
ANAPC11	130.055	131.889	126.83	124.163	131.833	139.696	127.932	132.248	128.895	132.488	125.057	124.218	139.542	126.399	131.747	130.696	131.779	126.07	123.12	129.476	144.607	125.438	138.458	137.707	134.304	124.823	124.456	130.922	126.807	126.278	137.817	153.235	144.327	123.078	131.056	125.393	137.145	129.541	135.952	132.174	128.388	124.829	133.748	135.065	123.177	133.343	137.112	132.79	127.303
ANAPC13	2670.48	2345.85	2320.95	2081.48	2590.98	2621.3	2128.03	2384.14	2357.63	2686.38	1961.23	1760.25	1899.99	2325.97	2030.94	2435.22	2701.42	2389.36	2401.56	1580.07	1684.92	2145.84	2428.85	2582.55	2219.47	1990.74	2465.72	2110.92	1690.35	2347.42	1866.22	2145.84	2059.54	2415.18	2431.93	2273.12	2854.15	2152.8	2416.85	2197.16	2023.51	1791.06	1722.99	2216.82	5637.9	2415.18	2603.27	2354.14	2201.42
ANAPC2	138.133	136.801	125.733	139.119	131.779	137.58	138.22	134.563	118.239	119.142	145.793	143.014	138.7	138.798	144.632	135.246	138.732	139.787	136.011	166.313	143.207	151.592	143.643	129.387	140.549	141.03	130.922	140.423	133.502	143.501	161.888	158.446	140.95	135.334	139.67	142.4	138.774	143.196	137.462	135.543	140.997	149.923	146.622	147.58	122.97	142.843	125.431	136.452	133.469
ANAPC4	1602.31	1352.7	1376.44	1468.86	1088.66	1036.83	1637.6	1131.38	1539.31	1948.45	1146.73	1282.19	1092.66	1007.7	1154.9	1300.75	1126.99	1082.62	1251.38	788.593	915.12	1117.07	1036.83	1057.31	970.755	879.253	883.616	794.11	952.563	1124.31	1167.98	1206.81	887.994	1206.47	1339.74	928.522	1035.49	815.02	849.085	924.431	989.432	632.016	506.487	1115.1	1567.61	1206.47	1059.06	1089.03	1258.81
ANAPC5	1973.82	2167.71	2132.14	2574.74	2149.74	1688.49	2112.18	1962.43	2897.29	3540.06	2802.99	2914.09	2480.98	2329.12	2377.69	2329.12	2507.06	2781.39	2619.18	3697.36	2412.37	2586.7	2430.28	2379.37	2329.12	1903.16	2059.54	2129.34	2660.96	2479.59	3075.62	2380.77	2403.01	2656.57	2303.17	2283.97	2237.75	2538.57	2471.23	2270.12	1803.11	1921.79	1593.07	2132.14	1722.99	2550.47	2010.84	2273.12	2368.24
ANAPC7	214.099	195.256	257.643	214.691	229.214	204.027	206.935	211.081	122.966	120.104	211.264	172.108	208.647	214.44	202.073	179.86	200.146	164.858	170.578	180.726	169.798	145.669	197.797	178.557	195.094	192.294	182.359	153.165	139.562	206.821	190.479	182.557	215.731	221.49	243.518	233.679	198.243	139.44	141.996	149.729	161.952	199.77	206.272	198.919	124.952	186.913	194.294	191.571	170.417
ANG	262.899	210.849	391.391	315.437	340.592	523.794	281.122	498.159	302.365	199.119	261.57	286.914	264.029	316.104	252.986	345.989	233.541	247.755	256.436	394.488	343.547	304.555	400.138	409.782	271.184	1018.49	1228.8	417.512	546.319	512.723	383	471.164	588.124	296.286	302.679	463.176	491.884	992.019	527.965	490.67	805.733	812.903	1362.4	512.869	724.513	506.478	738.295	389.676	392.979
ANGEL1	269.841	315.471	253.822	274.57	230.813	258.091	248.911	242.405	275.989	291.351	297.595	267.353	244.061	248.876	286.797	239.785	257.88	269.284	253.863	303.882	282.918	275.072	244.061	224.516	267.71	263.855	289.536	250.073	291.947	232.71	256.848	227.911	271.286	223.256	272.06	269.647	243.518	297.382	315.278	214.057	283.116	357.93	311.553	266.575	177.238	279.017	227.315	251.273	253.985
ANGEL2	1766.82	1736.99	1539.31	1668.66	1336.84	1203.63	1362.28	1431.26	1987.5	2063.28	1773.75	1541.04	1523.66	1525.08	1352.01	1371.15	1575.58	1263.46	1621.4	889.756	1050.6	1298.79	1151.88	1289.89	1255.21	1163.71	1017.51	1235.65	1347.82	1315.7	1513.53	1463.34	1172.85	1435.85	1650.43	1307.21	1217.81	948.351	970.482	1220.1	948.09	778.882	616.754	1544.87	2191.14	1641.7	1122.41	1392.52	1415.79
ANGPT1	169.37	181.482	201.834	184.3	166.001	176.97	179.025	171.01	199.398	243.927	154.066	156.148	197.264	172.105	166.038	161.96	159.085	163.191	204.917	136.827	164.458	156.137	187.024	171.724	165.079	186.517	171.217	171.601	155.965	164.881	154.294	148.872	231.74	173.686	173.072	189.591	194.044	186.481	208.147	206.184	160.722	172.943	183.205	198.809	190.777	152.35	154.599	161.4	127.117
ANGPT2	124.497	123.142	125.585	116.423	117.42	125.264	126.914	128.061	122.57	118.926	116.941	118.798	122.853	119.734	119.609	119.325	111.182	119.62	120.499	122.276	120.984	120.715	122.58	125.034	123.281	122.563	124.173	123.849	120.657	124.555	120.468	115.094	115.209	117.91	121.726	116.527	120.043	122.236	121.966	119.153	121.975	120.637	124.424	118.093	119.594	121.129	122.993	120.2	120.745
ANGPT4	118.892	120.223	112.011	114.474	122.473	115.278	106.954	114.051	109.703	113.222	118.467	115.046	122.519	113.366	115.154	120.563	110.784	114.707	129.081	111.934	114.272	114.586	118.22	120.801	121.061	113.344	111.419	114.347	114.467	112.469	118.169	119.971	112.489	114.828	113.796	114.034	131.195	115.099	118.788	113.463	116.503	111.954	115.436	115.388	120.206	130.737	113.485	116.351	110.306
ANGPTL1	115.004	118.06	113.883	119.504	118.17	115.67	116.022	114.844	115.868	125.754	114.356	119.729	116.635	119.77	118.81	123.484	115.624	123.721	121.15	120.815	113.148	123.274	116.815	118.21	115.912	113.887	114.51	114.549	122.203	115.143	117.326	116.276	123.01	115.011	119.309	115.469	117.702	117.159	116.803	113.205	112.044	116.068	118.353	118.267	113.417	113.766	121.299	117.888	121.535
ANGPTL2	121.036	124.079	119.326	120.53	122.898	120.293	112.123	122.645	124.917	116.551	122.412	119.296	119.599	120.415	116.509	118.413	120.141	121.281	112.386	116.458	119.163	123.705	114.754	116.468	123.567	127.631	124.258	119.471	120.697	122.411	120.451	117.802	119.933	116.095	115.077	118.036	122.043	127.012	122.343	123.647	119.169	116.84	115.982	129.49	124.987	121.738	119.226	119.447	120.597
ANGPTL3	122.131	128.182	118.956	121.991	121.927	118.119	122.328	121.55	130.98	120.865	120.244	121.255	126.633	121.939	120.442	119.997	118.069	126.463	124.617	115.299	126.235	120.472	126.291	125.314	117.084	124.542	121.708	124.628	122.755	120.903	121.849	126.784	122.381	122.133	124.812	117.035	120.55	118.21	124.861	124.472	124.714	127.656	124.07	114.605	127.26	124.621	114.981	119.338	118.926
ANGPTL4	127.987	157.232	124.903	129.312	139.748	125.689	129.236	129.562	131.082	122.161	123.981	121.742	137.87	125.969	127.081	121.793	132.022	139.429	128.439	135.992	135.728	125.719	131.517	124.017	129.486	137.349	137.107	128.984	126.912	146.934	122.748	121.417	130.076	135.481	135.541	125.305	132.454	125.605	138.876	128.838	123.765	142.079	135.519	135.261	169.673	121.956	146.407	134.881	179.649
ANGPTL5	117.381	116.978	113.381	119.229	122.785	115.102	119.905	118.225	113.355	121.804	127.84	121.829	117.801	121.744	116.387	117.072	122.154	124.526	116.031	112.61	128.37	115.405	117.323	124.852	112.005	115.785	112.8	117.195	113.919	112.844	108.316	119.383	117.849	121.122	115.15	118.128	119.201	120.166	114.819	116.431	109.142	117.046	126.735	121.618	110.039	115.591	117.639	110.749	124.276
ANGPTL6	132.152	137.887	125.869	132.872	136.959	145.014	132.685	136.203	154.473	131.618	146.679	137.253	149.712	138.395	134.132	139.352	129.518	141.361	146.467	161.952	163.114	143.607	133.767	137.553	134.939	129.91	134.31	151.642	165.609	132.459	141.916	141.055	144.449	139.622	130.76	144.311	141.553	127.031	130.997	129.867	128.297	139.002	120.606	133.25	131.501	147.665	131.055	131.734	134.775
ANGPTL7	119.164	118.122	116.762	118.974	112.341	119.833	117.609	112.492	113.885	113.763	117.636	116.722	113.613	124.374	113.95	117.041	119.007	116.747	127.633	114.629	106.389	119.065	123.339	118.448	110.829	112.482	119.743	126.199	108.155	126.902	115.832	120.848	118.182	109.022	116.249	117.133	118.949	118.867	118.456	123.414	121.176	117.858	128.192	111.703	116.669	128.78	122.697	116.317	115.513
ANK1	131.861	139.123	126.766	129.658	123.85	120.25	133	129.112	139.625	147.629	140.488	152.714	130.67	135.16	137.094	127.111	137.126	133.278	141.326	135.424	123.81	136.458	140.347	130.494	128.886	127.588	124.457	133.685	134.152	143.388	129.294	135.005	143.788	130.528	147.467	127.514	137.811	243.133	148.791	185.096	221.049	141.832	126.568	140.056	116.616	132.184	128.533	145.682	121.938
ANK2	117.952	124.086	118.096	121.402	120.561	121.232	118.211	121.173	118.042	119.605	129.705	122.78	114.502	118.066	118.342	126.634	117.57	120.026	113.492	117.777	123.688	114.692	112.227	120.048	119.809	120.619	128.59	119.005	120.037	122.815	123.008	117.46	122.845	125.189	117.621	124.309	130.189	120.015	121.172	119.157	121.995	123.618	125.049	122.414	160.665	114.809	117.622	120.918	113.128
ANK3	142.368	143.532	146.16	138.783	142.416	145.13	143.085	152.545	162.275	177.463	148.74	155.341	153.789	134.521	130.371	143.715	138.609	144.7	133.811	139.389	141.781	142.476	163.194	145.18	158.928	148.24	142.708	135.536	152.645	135.169	147.659	128.812	143.769	144.616	149.333	132.804	142.021	131.943	139.29	137.242	138.463	137.05	132.56	143.166	138.468	164.377	142.088	144.397	136.302
ANKAR	170.948	158.062	152.903	148.818	157.605	136.039	156.586	131.06	170.775	167.473	170.419	165.162	160.118	168.869	159.51	149.631	144.708	148.726	165.186	133.82	142.08	145.134	143.704	142.363	144.616	133.459	136.532	143.026	138.621	145.547	162.624	151.389	149.646	142.77	172.687	143.056	145.745	137.096	124.423	145.572	126.667	124.104	119.343	154.811	254.393	156.704	141.488	148.579	142.479
ANKDD1A	251.926	365.728	201.194	444.089	212.781	200.413	221.032	255.421	307.833	542.233	236.544	239.206	350.974	247.082	233.004	262.17	258.542	253.958	267.902	226.85	191.875	239.925	196.646	187.018	244.084	204.519	203.967	212.045	245.929	225.607	212.44	266.895	280.05	272.217	190.879	238.546	197.959	170.547	187.994	291.518	211.733	154.489	200.394	187.431	643.387	220.151	267.353	222.864	422.045
ANKFN1	107.947	124.546	116.591	112.248	112.55	111.864	117.346	111.076	110.508	114.499	121.263	112.253	112.558	126.606	117.515	120.142	115.683	116.07	114.394	106.954	113.28	120.148	115.051	116.069	112.195	115.044	119.781	113.061	113.539	110.626	112.077	117.921	114.717	115.24	115.49	115.812	116.988	111.4	108.721	114.493	115.099	116.956	113.463	117.551	117.981	110.629	116.697	117.956	110.955
ANKFY1	306.848	295.173	274.332	344.414	273.33	315.726	331.935	254.424	518.917	342.798	397.785	434.456	392.036	393.692	399.713	420.661	413.65	476.046	455.743	220.443	287.074	288.411	234.179	359.473	259.15	261.891	333.497	385.122	407.772	436.166	365.851	410.4	438.436	391.398	420.737	371.37	222.565	194.543	281.034	264.525	427.635	309.737	247.749	346.627	874.689	300.146	464.767	422.192	457.969
ANKH	127.951	132.972	121.8	125.568	122.257	124.171	123.025	136.137	113.124	118.096	132.448	119.62	121.385	135.364	126.079	124.018	130.256	118.548	128.511	132.694	129.801	133.263	128.4	125.555	134.655	123.835	124.372	123.568	116.65	118.423	121.385	122.754	123.887	136.227	124.092	127.713	115.836	128.94	133.524	130.071	126.904	117.055	119.897	115.629	116.566	125.844	123.662	128.218	174.499
ANKHD1	152.29	155.522	176.841	148.674	162.426	174.593	161.684	167.698	128.639	131.29	142.763	132.283	146.07	143.315	144.177	145.297	146.539	147.944	138.638	146.953	146.252	130.663	151.516	137.232	142.89	144.831	146.267	120.137	125.197	152.352	129.769	147.326	159.98	158.825	139.86	162.385	143.421	121.739	129.048	141.034	150.186	139.403	153.256	129.031	138.935	128.271	152.06	138.259	126.463
ANKHD1-EIF4EBP3	186.347	183.24	186.582	202.611	167.277	177.867	173.113	177.743	165.692	185.9	213.25	194.257	196.238	178.909	199.458	183.5	177.897	206.21	196.096	235.612	169.84	196.714	177.994	177.266	160.957	148.008	162.66	170.98	186.123	188.454	198.982	184.207	188.946	203.302	185.085	179.284	163.215	170.538	140.92	157.84	173.768	155.587	184.784	201.902	115.191	195.802	190.606	185.659	139.379
ANKIB1	1029.14	932.981	782.636	999.383	739.799	675.709	955.151	879.708	1290.87	1226.75	955.767	852.095	872.376	936.275	891.614	1033.45	1063.99	903.15	943.454	650.459	739.406	933.324	1020.94	940.209	901.536	717.394	774.865	919.984	1023.92	770.058	881.443	872.141	654.914	1044.59	990.868	918.976	970.17	764.259	725.037	864.306	655.087	572.769	436.07	833.295	1885.23	965.398	895.611	628.004	1410.05
ANKK1	129.451	128.256	122.183	122.895	126.583	127.259	117.387	120.93	126.519	130.575	120.535	135.566	112.61	115.972	123.668	112.939	126.237	123.031	123.665	130.908	116.223	123.922	134.634	118.45	120.776	125.295	120.569	125.877	123.57	119.826	137.198	127.18	126.721	127.452	116.04	125.1	127.247	122.082	120.123	118.484	120.368	126.379	117.503	134.482	128.305	128.214	130.096	120.231	123.989
ANKLE1	142.438	127.909	127.735	123.343	126.171	126.3	123.318	131.417	118.351	127.903	123.902	134.388	132.871	130.808	124.903	125.057	142.322	126.01	132.571	135.261	123.888	127.967	127.234	129.979	125.543	123.976	135.394	130.013	140.274	121.193	141.201	132.708	144.913	132.25	134.798	130.648	124.349	124.43	130.072	124.408	126.225	135.466	151.781	139.469	127.106	126.694	134.793	133.75	121.884
ANKLE2	614.747	710.546	711.725	663.865	548.739	572.413	652.468	450.328	911.971	1133.84	561.986	646.115	578.94	587.333	690.834	616.639	619.237	651.473	644.239	689.554	572.769	646.981	622.799	600.234	622.938	657.266	523.117	706.795	946.338	626.278	586.712	534.823	704.728	610.76	610.37	598.579	501.915	550.239	579.184	527.601	816.701	588.588	574.971	757.054	249.835	826.794	521.899	740.197	529.954
ANKMY1	119.401	116.603	123.902	120.77	119.992	124.927	118.535	129.755	120.931	122.881	116.18	115.339	122.62	123.041	127.086	132.576	121.052	133.197	116.584	122.076	119.414	117.106	122.507	132.45	119.047	120.603	130.274	128.336	126.08	116.871	125.339	123.903	124.824	128.042	120.067	119.172	110.327	120.262	116.734	122.669	120.933	119.455	121.008	122.112	124.641	126.869	126.403	125.473	114.911
ANKMY2	444.089	381.279	378.695	400.744	427.065	298.068	407.363	353.793	620.822	555.307	382.105	341.275	399.485	447.783	360.466	420.276	487.005	358.816	468.132	429.139	381.799	391.819	446.415	414.206	423.354	305.437	322.301	437.322	416.58	412.909	456.282	374.096	387.601	532.177	487.866	397.27	553.349	406.058	367.798	398.988	300.186	251.109	222.427	404.233	665.761	429.857	392.109	345.731	447.783
ANKRA2	893.674	757.222	785.961	825.15	803.62	689.875	797.509	809.759	1000.09	986.801	875.115	750.715	867.317	882.706	833.003	980.161	925.353	817.647	786.25	496.806	790.698	808.613	851.968	866.263	1039.24	581.383	602.379	845.858	912.292	639.98	624.527	636.407	706.427	892.649	1016.13	900.405	944.075	591.849	887.684	806.773	449.704	459.038	397.352	930.584	804.779	917.422	680.94	704.082	820.897
ANKRD1	125.695	123.243	122.285	129.266	121.181	125.143	139.014	122.297	126.625	132.251	142.559	129.643	122.818	120.05	122.981	139.495	114.915	116.851	135.246	110.275	124.195	120.352	121.634	132.171	128.934	129.574	129.108	112.995	119.724	126.811	123.097	127.475	118.463	137.484	119.812	128.28	125.617	117.274	123.184	125.133	117.279	125.198	128.641	121.089	125.632	131.955	125.469	124.84	115.087
ANKRD10	820.279	704.73	676.156	712.527	713.434	511.471	702.606	664.23	1145.18	1168.84	740.579	647.374	631.32	751.627	703.464	726.535	787.063	727.753	746.711	441.057	599.705	667.927	647.877	668.401	687.643	511.472	518.335	818.179	775.64	567.183	598.867	563.062	786.882	829.499	862.822	689.615	756.371	553.915	580.164	805.953	467.735	456.517	393.263	821.435	531.469	841.481	632.911	632.337	843.791
ANKRD11	702.44	653.557	671.388	621.724	558.134	581.034	682.098	568.356	574.915	452.589	745.9	677.62	618.674	662.009	603.917	702.269	755.359	621.29	625.055	479.663	608.903	660.032	603.867	679.916	789.018	526.685	643.782	493.529	510.233	622.121	578.498	604.952	482.998	859.332	684.836	573.434	480.474	343.149	582.822	633.073	529.939	555.539	441.113	486.487	839.159	626.652	638.742	716.686	626.222
ANKRD12	887.196	1027.59	788.433	885.017	477.548	603.062	922.813	407.363	1019.04	1132.2	885.607	654.436	825.362	845.447	875.152	894.903	834.2	796.577	886.751	710.129	646.551	896.132	846.42	876.023	972.236	528.827	471.768	924.734	768.229	557.51	787.721	595.788	622.641	847.439	1002.25	584.436	607.717	582.242	784.624	797.646	487.189	389.285	239.339	654.436	553.349	876.706	690.664	862.869	820.854
ANKRD13A	2061.03	2000.1	1615.97	1748.86	1536.41	1651.19	1577.07	1284.13	1918.71	1944.87	1359.59	2041.02	2086.72	1724.74	1929.64	1781.88	1781.88	1794.22	1995.33	1504.99	1834.99	2117.27	1881.14	2112.18	2015.53	1662.7	1423.44	2174.6	1797.11	2012.76	2236.1	1898.86	1817.78	1858.75	2000.1	1782.92	2182.91	2009.7	1621.4	1942.48	1718.63	1413.02	1340.35	2143.03	1264.9	1900.92	2249.89	1567.61	1772.01
ANKRD13B	128.448	137.256	129.34	134.261	129.289	126.14	124.082	128.328	124.264	129.586	127.062	128.556	131.966	121.647	126.353	123.367	128.927	123.046	130.767	125.648	118.328	123.663	129.953	123.231	126.109	129.638	125.1	129.975	131.034	132.809	135.184	139.155	120.242	122.339	126.247	125.405	125.379	119.66	133.693	134.733	121.19	125.513	118.972	123.234	121.612	122.225	133.586	136.691	122.041
ANKRD13C	312.092	253.305	322.301	259.55	284.016	223.654	305.345	274.332	334.071	289.163	279.938	266.259	305.046	290.796	289.569	293.539	305.73	276.654	303.962	174.048	294.181	284.195	330.173	316.002	335.008	253.258	249.236	341.571	271.286	224.353	239.536	225.497	274.923	406.058	395.729	277.513	337.229	264.895	266.575	284.666	216.224	233.027	217.293	328.865	412.909	356.07	225.715	231.699	331.472
ANKRD13D	125.329	129.573	121.039	124.487	129.656	126.557	131.591	128.357	125.028	127.679	130.61	132.44	135.508	134.644	140.014	134.642	128.746	135.968	124.223	133.218	125.853	126.6	131.531	123.703	131.379	123.138	125.215	125.396	126.382	127.832	122.162	140.031	132.884	127.643	125.579	128.899	134.045	130.624	125.571	127.459	134.927	124.598	128.513	131.009	124.48	132.84	126.433	125.198	130.865
ANKRD16	162.856	177.142	173.553	165.303	169.31	179.649	163.615	174.966	168.315	162.738	162.928	156.282	138.855	148.658	146.621	156.54	155.324	152.995	149.442	146.517	157.643	163.31	159.335	142.969	162.536	185.971	174.845	145.65	152.905	146.131	166.608	168.659	140.883	157.866	147.857	151.435	147.412	161.074	161.54	151.57	171.836	217.293	178.658	146.595	271.661	152.436	155.043	151.231	161.209
ANKRD17	341.275	302.071	319.223	297.465	281.798	288.174	283.646	260.16	428.462	438.846	318.152	319.638	335.517	319.223	315.114	351.161	378.38	295.878	342.964	202.027	263.076	319.223	293.061	301.639	309.01	230.103	231.612	443.363	341.387	283.646	346.569	340.121	322.122	385.619	423.354	309.01	324.645	298.523	287.667	278.898	245.773	201.139	265.514	390.219	651.034	358.384	293.574	289.412	407.434
ANKRD18A	121.321	119.657	118.775	117.576	117.792	123.69	116.845	118.824	113.313	124.615	116.069	122.126	114.817	109.316	119.812	123.558	123.287	125.201	125.634	120.028	117.968	118.764	120.196	123.763	120.271	124.259	116.411	128.079	119.111	113.928	122.564	117.6	120.843	126.334	120.83	122.623	123.163	124.995	123.999	125.868	121.273	127.186	119.171	118.527	122.462	121.087	117.736	115.641	127.048
ANKRD18B	126.824	114.258	117.984	122.399	119.231	114.627	117.354	119.628	118.877	125.704	120.123	117.878	119.418	116.547	119.566	114.103	119.896	115.486	122.315	126.311	115.692	120.292	117.219	111.96	120.201	128.8	121.777	124.248	123.888	116.218	121.763	120.502	115.176	122.465	115.412	123.645	119.888	125.513	123.117	124.708	125.165	120.722	124.041	122.634	132.533	114.866	122.294	119.216	119.368
ANKRD19	121.053	125.722	133.094	127.942	132.572	129.634	125.204	132.11	122.107	119.243	119.21	113.975	137.335	133.367	135.229	128.792	142.698	126.58	123.93	121.597	122.526	129.239	129.714	129.894	128.674	123.774	117.7	117.493	142.052	127.791	118.504	120.504	120.188	120.505	122.786	123.877	119.548	114.673	129.726	133.093	117.887	119.498	115.411	118.395	114.302	122.519	134.191	126.785	118.104
ANKRD2	119.417	121.881	120.609	116.466	119.981	122.56	130.347	117.288	114.353	119.616	126.214	109.327	112.477	116.291	113.07	110.48	126.149	114.956	112.76	120.669	119.88	116.938	120.042	125.398	118.477	124.654	116.554	124.75	126.749	112.732	125.457	114.235	112.916	114.306	123.141	128.69	120.178	117.341	133.429	117.929	123.212	123.904	125.095	121.622	121.084	118.602	121.44	125.965	126.946
ANKRD20A1	184.55	143.942	153.325	144.743	164.182	160.506	166.653	155.059	184.048	167.962	142.841	187.057	155.894	159.726	176.176	149.482	213.03	145.469	221.558	149.147	148.351	144.304	160.782	224.318	138.122	131.667	136.236	148.694	128.907	156.373	140.107	145.041	141.689	150.191	134.13	142.383	140.465	130.465	129.681	158.842	132.116	142.258	127.584	136.308	144.286	151.941	144.131	127.905	133.616
ANKRD20A2	111.309	112.483	114.616	115.374	113.234	116.245	128.334	116.572	111.559	108.733	120.931	113.98	114.024	115.557	120.781	115.334	114.33	118.907	113.604	117.283	116.757	112.028	114.226	110.189	117.84	117.696	109.7	107.273	116.535	116.845	116.254	111.95	112.772	110.93	117.769	115.998	110.969	117.856	119.358	126.135	114.243	118.711	117.236	113.246	117.695	111.175	115.023	112.196	121.687
ANKRD20A3	139.551	126.653	122.367	122.966	123.159	123.62	125.387	126.277	122.463	123.38	127.929	127.7	121.502	123.903	125.571	121.366	121.511	122.166	133.832	116.903	126.88	122.39	128.682	122.151	131.275	125.117	124.954	122.438	122.613	116.787	128.577	119.003	123.744	117.074	121.086	119.362	125.772	130.182	120.277	123.691	119.017	125.968	124.022	123.232	117.044	127.646	121.195	126.68	115.599
ANKRD20A4	122.923	119.147	115.066	112.538	116.641	118.25	119.407	119.215	116.281	122.037	110.779	119.331	116.396	116.782	114.293	122.203	116.614	118.382	113.599	116.149	121.427	108.255	114.791	116.471	113.554	115.871	116.141	126.264	113.169	109.299	117.043	119.734	113.472	126.408	112.87	111.914	117.908	120.515	117.014	122.15	113.962	117.492	116.073	113.937	107.559	113.747	118.071	113.123	120.248
ANKRD20B	117.047	114.024	115.051	112.389	116.703	122.61	122.397	121.679	123.34	122.737	115.852	117.995	115.855	117.874	119.48	121.987	124.092	117.886	117.394	117.341	116.782	119.48	116.833	119.892	115.6	118.893	115.645	116.88	117.258	116.759	123.612	118.293	118.613	113.451	119.737	118.121	118.048	116.696	113.85	121.021	115.776	117.952	116.706	122.173	127.303	118.57	116.645	113.939	125.677
ANKRD21	120.912	117.358	125.337	121.464	111.309	126.912	117.372	120.997	120.996	108.758	117.281	125.293	123.529	128.784	112.073	123.376	119.66	114.731	120.832	113.106	115.074	130.041	121.106	121.691	115.4	125.347	115.349	116.106	118.986	126.049	120.771	115.489	121.551	128.204	123.078	125.904	126.1	122.94	119.353	117.977	116.749	119.145	117.521	118.413	120.882	125.121	116.411	121.666	115.871
ANKRD22	191.389	179.381	177.728	171.688	167.79	207.968	155.567	196.792	193.829	164.677	177.087	341.015	191.478	163.194	217.634	173.224	182.6	267.003	214.767	172.438	207.337	184.499	199.779	263.174	155.053	221.887	162.471	399.096	757.508	258.158	293.62	160.238	184.578	150.497	208.389	190.108	205.685	157.934	198.735	240.583	516.141	228.567	240.379	270.852	170.385	159.168	251.68	170.678	259.01
ANKRD23	139.155	137.636	144.345	135.775	132.534	133.589	140.487	138.242	149.447	153.095	149.252	143.329	135.156	140.095	143.781	143.377	133.61	147.673	133.694	143.492	138.478	137.194	134.95	135.619	134.154	131.321	141.774	148.212	148.366	138.059	140.904	149.239	133.766	137.642	134.378	142.648	139.024	136.233	140.138	152.651	148.174	149.732	136.547	140.356	128.096	142.14	134.155	134.118	125.647
ANKRD24	131.537	140.087	143.702	138.126	135.665	138.015	133.815	122.962	125.201	135.501	144.439	137.008	133.655	136.498	121.374	130.883	122.348	133.062	122.705	137.904	133.149	143.51	124.168	122.91	140.374	139.658	134.461	131.494	130.475	135.545	143.462	140.622	127.443	146.224	130.479	133.033	129.375	127.76	126.044	133.419	133.932	126.219	144.069	132.559	174.963	137.919	127.212	145.92	120.705
ANKRD26	144.964	147.659	165.433	158.841	144.827	142.484	163.394	136.972	197.813	212.915	156.006	145.742	176.826	168.857	165.214	155.587	160.816	173.866	150.744	161.374	142.397	167.362	162.866	157.533	160.784	146.131	148.305	177.726	173.02	161.047	160.124	156.333	170.24	176.533	186.487	153.412	175.49	159.998	160.562	150.793	128.882	138.008	126.294	153.711	149.712	167.698	165.005	151.917	146.99
ANKRD27	226.956	218.586	210.6	200.181	237.686	204.202	196.624	196.238	324.011	452.173	262.415	301.329	266.146	267.385	299.965	288.971	282.254	238.973	242.631	262.336	239.168	234.639	245.655	286.671	255.317	165.684	182.261	417.578	425.971	252.911	307.891	255.39	340.292	222.02	336.103	298.716	285.341	234.258	247.174	270.328	225.065	176.801	215.503	345.964	184.827	324.418	246.233	288.36	258.024
ANKRD28	267.777	255.694	234.595	248.522	212.675	216.754	216.904	225.448	343.851	369.959	252.66	245.564	245.423	280.045	244.408	235.898	266.723	304.298	307.207	208.617	234.718	294.512	319.56	295.515	284.333	195.002	191.026	224.006	235.443	196.827	228.82	196.55	251.265	238.41	249.26	226.436	259.243	212.232	256.012	281.723	186.677	191.989	158.697	226.734	206.583	210.585	195.048	223.574	198.424
ANKRD29	117.147	112.564	119.323	116.646	121.105	120.005	121.677	117.972	114.272	116.692	117.545	118.991	121.538	120.525	115.665	121.854	119.641	129.131	115.081	118.753	120.248	114.68	124.618	118.962	119.049	117.337	119.194	122.475	116.923	114.558	119.651	119.018	116.941	116.539	121.537	112.145	113.361	120.266	119.771	117.707	115.669	115.685	118.218	124.112	120.649	116.929	112.03	116.598	116.031
ANKRD30A	112.037	113.03	113.097	109.832	114.112	117.238	109.169	111.261	116.525	111.882	113.398	105.52	117.549	121.021	120.898	113.395	115.483	110.306	110.374	117.637	113.973	110.912	122.433	113.35	109.546	112.527	109.483	117.93	116.506	112.071	114.05	110.442	113.633	112.942	115.34	115.592	110.442	116.331	111.016	117.163	118.078	111.488	113.968	116.403	117.46	114.162	116.233	109.472	114.249
ANKRD30B	4646.26	4081.6	4732.69	4492.17	4778.22	5494.26	5105.03	5559.51	2282.28	1856.61	4809.75	3805.21	4213.84	4604.47	4062.42	4522.23	5043.99	6482.47	5269.45	3946.11	4081.6	5452.68	4298.26	5348.79	5168.71	4068.31	3697.36	2233.38	2756.37	5410.5	4683.97	5037.95	4570.55	6410.23	3995.07	4440.35	2901.35	2049.45	4116.39	4565.2	3933.32	3448.45	2644.17	5008.84	2347.42	3697.36	6779.26	6383.18	5092.53
ANKRD31	119.785	133.071	120.203	126.015	123.81	118.041	121.464	117.597	110.758	119.867	122.706	116.682	116.04	121.431	116.732	116.95	119.585	136.598	131.007	121.111	116.668	116.457	119.6	120.999	110.549	119.457	115.008	121.918	122.029	125.338	119.084	125.459	118.551	125.759	117.149	123.111	115.176	121.466	137.722	122.462	121.407	120.581	127.728	122.71	128.531	112.057	124.626	116.428	120.721
ANKRD32	243.104	205.554	202.218	191.003	198.041	168.91	207.716	201.957	293.551	309.889	215.397	215.592	215.379	192.611	212.845	232.757	230.558	174.381	196.08	171.969	164.766	185.25	208.906	190.805	198.06	153.877	179.461	291.971	273.618	267.488	274.206	215.2	207.788	255.155	280.575	245.284	232.157	208.342	187.608	249.448	169.267	148.751	145.542	217.717	553.301	246.293	228.698	203.827	248.438
ANKRD33	450.249	535.902	544.241	513.404	450.929	576.85	422.261	500.863	222.54	281.414	414.95	521.899	378.95	410.4	420.573	348.014	393.013	573.65	482.25	620.822	447.856	450.666	498.609	416.21	432.822	1122.41	956.444	622.496	407.848	566.738	554.99	591.669	688.237	462.981	414.356	542.128	746.884	1146.44	534.03	517.386	1427.32	1348.88	2833.35	549.766	1346.71	501.703	824.277	507.609	395.925
ANKRD34A	149.279	145.125	138.609	155.028	141.568	166.96	150.578	157.533	151.739	188.946	159.529	151.357	150.664	150.162	144.895	145.423	161.209	146.948	152.897	150.608	140.671	153.901	151.61	132.848	134.784	153.789	150.925	147.521	147.727	148.796	145.125	140.432	145.728	149.286	133.408	156.035	142.221	148.26	133.818	151.04	149.286	156.416	173.829	140.656	188.675	174.037	127.896	147.63	176.685
ANKRD34B	126.94	109.574	112.95	114.796	119.494	114.149	101.794	116.846	148.705	114.838	119.86	158.972	131.139	124.188	123.922	126.222	121.999	122.683	133.711	111.352	119.748	124.445	118.596	120.675	130.18	115.409	112.569	348.807	135.91	138	144.276	124.429	139.4	121.179	159.236	141.96	164.986	154.797	120.911	140.531	123.076	114.641	142.669	172.611	295.836	156.282	256.783	123.787	124.048
ANKRD34C	135.235	126.539	125.675	128.393	129.337	122.487	126.103	131.437	130.217	124.647	127.678	129.345	130.455	132.672	115.223	127.43	122.956	131.358	128.838	122.653	131.493	131.267	134.252	127.22	128.162	125.561	124.719	133.4	124.672	126.703	121.783	125.506	124.715	121.689	120.119	123.115	133.278	122.318	130.31	134.353	130.643	131.229	126.09	124.215	125.424	120.489	117.885	120.136	128.021
ANKRD35	173.38	160.528	173.728	167.64	190.964	180.133	155.839	162.697	172.554	173.732	143.859	170.423	146.743	156.318	148.526	157.699	147.851	153.226	161.807	152.802	156.6	146.988	160.583	150.931	139.926	200.301	175.842	155.8	160.306	164.306	158.416	156.836	161.572	155.053	143.313	149.983	154.357	185.605	175.554	149.581	237.257	179.287	323.262	144.851	339.812	146.159	166.605	136.814	221.82
ANKRD36	152.925	135.636	173.147	160.35	163.12	167.174	208.732	168.578	137.174	138.169	153.803	134.128	149.379	159.586	155.202	168.851	186.185	157.599	240.831	204.956	155.978	137.259	160.162	136.53	136.555	150.002	143.675	121.506	138.544	141.252	147.067	123.633	134.74	194.138	140.881	174.487	139.66	125.797	182.228	147.923	131.59	133.712	120.046	172.876	123.711	136.353	151.764	133.261	158.364
ANKRD36B	298.318	224.409	277.589	286.599	254.023	250.781	382.127	217.739	260.4	293.861	238.607	189.73	250.839	268.305	242.842	372.911	426.538	255.901	454.741	305.903	223.058	202.791	219.396	213.696	202.537	230.8	188.143	175.563	186.47	192.82	190.134	209.894	209.943	340.022	232.651	260.213	194.26	182.025	282.54	228.779	174.118	174.207	137.8	228.166	118.944	206.54	198.358	165.64	249.271
ANKRD37	202.096	201.647	202.135	192.333	211.733	209.927	196.748	314.73	282.438	286.362	208.124	186.533	172.801	213.25	188.675	204.519	191.936	176.786	198.419	275.072	215.933	239.002	213.742	220.806	218.765	203.503	253.715	203.59	376.31	189.089	210.672	174.209	178.298	160.834	195.218	226.606	200.278	188.691	234.284	227.315	192.202	239.029	196.732	217.888	131.882	224.727	216.789	219.927	231.969
ANKRD38	140.604	139.499	138.583	143.049	136.005	140.054	145.525	156.824	140.169	136.909	134.026	123.841	131.904	128.355	127.541	129.432	141.721	133.164	136.178	128.9	117.058	128.243	132.288	136.75	118.904	148.538	143.735	120.782	122.004	128.606	129.342	127.721	134.622	132.28	132.734	150.559	122.335	126.749	126.818	129.72	136.6	127.849	141.896	124.389	135.672	130.783	124.877	129.547	118.323
ANKRD39	295.666	292.881	277.623	289.666	284.912	303.305	306.48	358.144	361.213	343.133	278.785	269.955	249.807	249.725	264.326	253.126	261.118	275.954	266.771	457.108	390.667	327.131	307.833	311.642	287.401	351.669	395.316	249.457	324.247	283.449	244.423	283.005	219.671	252.29	204.993	267.865	278.983	350.914	361.601	293.758	319.268	433.278	435.237	212.976	262.272	294.533	262.997	269.728	224.701
ANKRD40	279.895	283.116	316.911	273.568	275.589	283.935	271.973	282.479	227.283	242.207	285.376	274.128	233.654	275.257	317.087	247.749	278.107	284.398	245.801	285.225	315.779	253.494	284.666	249.065	293.145	309.678	325.894	247.446	250.618	249.124	277.473	271.204	271.661	275.171	228.108	305.388	246.549	274.538	308.663	291.441	266.802	295.573	376.829	269.389	475.028	258.216	250.591	256.538	236.567
ANKRD41	130.844	136.194	127.491	142.001	127.01	128.507	131.075	131.694	143.04	125.126	127.943	127.349	140.905	134.143	131.19	132.473	124.272	132.616	123.437	139.962	124.969	132.186	139.014	125.353	125.867	130.479	133.407	130.688	133.541	135.671	161.411	137.851	139.286	135.065	129.257	139.158	132.672	131.813	126.057	121.748	132.433	141.447	138.116	140.481	213.973	130.953	137.814	128.545	123.171
ANKRD42	110.412	127.831	125.114	118.026	124.011	122.408	112.299	116.507	121.139	115.661	115.168	120.75	117.085	115.044	122.376	110.218	128.051	138.449	112.116	113.055	117.819	117.962	126.129	115.484	116.977	109.785	112.123	112.009	130.899	120.447	113.137	118.104	114.088	114.759	115.977	124.897	107.581	116.352	116.572	116.314	110.193	114.274	110.472	117.194	116.576	113.786	125.201	114.332	110.186
ANKRD43	125.699	119.236	122.49	127.016	122.299	126.646	135.743	116.008	120.894	120.233	120.747	118.383	125.306	125.223	123.584	119.515	121.933	123.412	118.228	116.386	130.451	123.735	130.577	112.178	123.603	120.419	118.429	124.574	119.506	119.133	123.14	119.805	121.149	119.739	120.456	115.933	134.582	120.386	113.977	119.316	124.663	119.364	119.732	125.409	175.155	119.372	115.777	117.478	110.793
ANKRD44	194.169	220.562	184.869	204.423	250.196	227.158	217.594	224.607	215.483	143.827	220.288	209.514	240.711	216.858	223.25	222.765	235.484	237.572	189.368	197.271	196.814	263.97	189.25	181.853	214.102	155.742	150.624	180.395	194.018	220.977	212.838	202.403	249.02	256.272	228.118	191.969	182.176	178.121	161.587	225.863	148.388	153.724	124.687	242.749	188.662	219.098	227.677	225.947	169.706
ANKRD45	122.387	129.05	124.19	122.299	118.356	122.673	124.729	121.966	117.032	115.661	128.708	112.257	121.719	118.109	123.567	132.944	120.165	126.09	118.612	118.132	127.757	129.024	120.143	132.459	124.643	127.994	124.264	127.727	123.831	124.37	123.784	120.757	128.227	121.212	111.729	126.636	122.173	131.76	130.106	120.643	119.877	131.354	128.769	121.768	131.062	126.758	126.52	122.541	158.126
ANKRD46	378.331	330.491	330.587	300.501	273.41	255.219	316.305	287.433	392.832	500.76	359.542	268.027	334.171	345.964	321.278	365.166	403.008	266.392	303.178	206.192	245.329	248.199	285.156	286.572	299.141	225.033	246.046	355.789	422.192	265.333	364.716	248.236	238.636	261.837	446.415	295.134	249.879	225.34	283.116	229.656	185.328	270.792	212.936	287.959	828.676	346.51	272.131	347.383	493.158
ANKRD47	152.559	144.546	135.762	131.208	144.566	132.548	138.384	124.94	129.818	133.5	148.299	139.247	141.948	142.018	143.844	139.912	146.626	138.333	139.762	143.085	126.261	142.662	135.903	147.047	141.218	127.447	132.921	128.114	122.609	134.873	129.229	135.859	132.535	135.981	135.797	136.017	139.724	141.651	141.101	126.513	133.125	139.08	146.892	126.244	171.993	124.91	125.137	135.055	114.465
ANKRD49	803.505	652.048	672.274	750.839	705.459	622.641	779.509	662.604	1027.84	1291.81	836.365	697.654	785.773	822.744	769.047	785.773	887.445	626.562	743.826	846.42	637.605	744.235	771.917	688.116	858.272	485.533	502.444	927.432	835.193	598.579	968.421	634.445	869.046	690.018	907.072	670.181	855.093	764.47	808.934	652.468	457.697	521.704	384.862	822.932	559.735	898.668	574.732	843.71	920.23
ANKRD5	127.438	125.369	126.395	117.48	122.165	121.72	127.103	120.345	120.298	116.398	121.05	124.322	122.816	122.75	115.263	120.964	116.463	114.913	121.781	125.85	123.798	119.078	116.867	121.251	119.869	120.352	116.171	119.83	127.357	116.756	125.828	120.911	121.737	121.618	115.666	121.413	122.125	117.71	125.879	115.15	119.354	121.48	142.879	128.464	123.927	126.717	133.843	127.537	124.738
ANKRD50	195.731	166.465	225.715	218.765	154.504	208.146	181.182	164.032	285.225	280.094	221.718	241.257	262.456	253.126	243.37	226.189	204.32	220.705	241.701	166.149	202.201	213.679	196.606	213.978	220.679	197.086	200.761	270.757	234.88	217.784	185.576	237.592	224.329	221.414	221.392	163.724	207.184	197.776	198.381	178.091	194.063	166.836	231.894	211.145	515.545	232.584	189.767	218.844	179.986
ANKRD52	132.288	145.465	146.15	140.948	144.357	145.512	144.546	147.669	146.397	131.796	151.095	157.755	153.769	139.551	151.902	132.471	137.203	142.428	138.906	164.157	140.766	162.087	126.891	134.784	130.49	137.89	143.963	150.002	143.66	141.048	157.67	160.608	129.98	147.434	144.426	141.273	128.475	120.34	134.914	143.447	145.922	152.265	148.635	145.525	111.251	151.624	155.292	146.739	123.135
ANKRD53	118.422	132.385	134.478	130.054	132.213	136.088	133.179	136.061	134.788	122.871	134.078	127.632	133.435	130.531	145.001	139.379	123.186	121.05	124.411	127.292	146.214	156.578	139.244	134.489	137.333	138.278	136.563	120.749	123.907	128.621	131.513	142.39	122.081	139.554	136.296	144.143	137.668	131.859	137.486	136.53	154.73	147.962	144.257	134.713	132.156	133.022	132.802	138.213	123.176
ANKRD54	229.91	255.354	221.346	267.23	245.126	230.035	231.025	243.343	348.982	408.531	269.647	237.162	249.154	235.896	242.302	232.133	238.358	268.637	242.901	249.944	248.596	260.863	246.648	220.194	186.035	260.586	259.332	253.366	299.141	239.339	278.018	234.639	213.016	229.59	206.256	220.343	224.891	174.726	210.575	193.604	174.614	280.986	299.101	243.128	274.57	282.764	208.103	256.09	241.642
ANKRD55	274.047	311.509	357.294	276.959	377.298	272.491	280.874	253.79	290.758	467.887	348.061	253.555	311.083	224.847	207.79	257.35	211.909	218.117	216.112	168.223	183.657	265.333	296.605	280.638	317.185	200.637	251.677	247.785	202.05	202.254	200.862	167.587	181.151	244.989	218.144	167.587	220.443	164.964	218.352	186.4	168.843	248.799	160.744	215.12	381.487	205.19	313.902	231.799	148.876
ANKRD56	123.299	111.838	116.264	117.536	113.052	116.319	117.331	119.41	123.399	124.84	127.951	118.192	132.812	123.336	113.541	116.817	117.854	121.303	121.35	117.092	125.012	121.388	120.653	122.674	123.889	123.058	113.641	120.805	118.934	121.573	110.728	114.116	121.045	111.69	116.125	117.55	124.258	124.348	129.044	115.7	114.627	117.644	119.009	119.232	115.898	117.644	122.361	118.165	125.762
ANKRD57	208.059	175.044	186.018	225.268	185.498	222.736	188.827	156.547	244.213	194.667	205.279	198.862	237.619	222.454	227.716	195.692	160.189	205.137	234.67	187.082	180.988	197.238	223.428	190.462	224.516	198.283	177.463	257.146	272.342	168.902	183.385	205.907	204.303	219.464	224.941	168.878	169.464	149.568	146.698	151.088	236.861	176.773	239.369	210.646	464.429	201.36	210.037	214.079	218.793
ANKRD58	131.419	132.995	122.945	125.283	135.935	123.18	126.582	124.361	122.04	120.482	151.177	139.619	122.035	123.391	121.538	120.614	129.34	131.889	125.926	128.22	144.468	127.121	120.51	123.545	119.757	136.582	128.696	120.596	121.04	122.121	125.434	133.355	135.215	118.229	123.134	123.708	131.385	110.145	124.089	125.759	135.626	127.649	129.006	126.107	147.221	139.2	126.383	124.803	143.311
ANKRD6	176.744	176.293	167.362	154.84	168.109	157.201	164.335	142.039	165.265	197.725	165.215	165.756	155.19	159.115	153.081	154.477	154.114	147.283	166.971	139.375	149.803	162.784	143.737	141.225	151.953	163.096	140.205	177.328	153.169	135.939	155.225	141.516	162.999	150.918	150.298	148.439	167.973	163.758	148.962	152.246	145.963	142.941	164.847	174.428	281.542	157.691	140.613	152.203	131.474
ANKRD7	127.247	137.697	130.012	133.021	126.781	131.823	134.801	132.805	123.487	124.825	125.113	124.819	130.648	133.888	127.242	122.748	123.738	127.741	120.211	124.259	124.315	124.818	122.361	127.948	138.253	131.237	135.561	126.353	132.788	133.489	128.166	131.71	123.349	131.681	128.573	126.921	119.042	128.417	122.701	126.299	127.176	133.863	129.525	124.439	168.685	126.009	130.758	133.478	120.074
ANKRD9	298.213	546.451	604.542	463.582	387.247	264.769	451.369	209.623	235.54	300.501	458.707	440.763	272.423	314.706	308.923	211.658	282.185	497.996	328.606	216.934	393.267	368.84	375.769	405.171	326.54	417.663	390.469	211.334	206.208	485.288	226.345	209.368	456.725	232.704	297.808	285.248	328.407	1627.61	592.487	850.378	1239.03	673.061	536.763	369.198	648.863	192.524	326.79	425.977	171.045
ANKS1A	486.721	438.611	469.447	508.971	395.178	458.957	457.879	440.14	610.634	508.02	590.735	450.742	576.496	474.063	488.522	583.415	503.685	585.302	565.396	406.855	481.343	563.791	463.449	519.352	473.289	463.374	500.172	774.34	739.227	496.229	396.844	478.919	499.595	465.644	498.811	415.245	435.994	431.886	513.221	593.418	533.666	515.129	696.234	528.49	997.854	493.729	605.614	475.118	677.536
ANKS1B	127.39	124.808	133.431	124.588	126.007	120.336	124.068	122.097	122.32	127.665	122.607	127.484	122.35	126.887	123.614	123.363	132.344	125.571	121.749	123.395	122.946	120.19	126.229	127.39	126.519	124.183	131.359	122.888	121.528	122.774	125.531	126.183	123.287	125.68	115.892	125.341	125.114	118.085	116.298	127.878	121.93	123.932	123.915	121.212	125.323	125.48	124.506	122.645	124.449
ANKS3	169.114	178.894	158.81	173.315	160.347	175.383	151.949	138.033	139.705	133.929	145.641	153.064	152.882	144.944	144.89	146.276	151.917	138.491	138.322	168.912	157.26	132.514	152.481	130.729	143.81	152.645	161.809	143.296	132.655	143.367	159.361	168.284	154.161	138.16	141.174	145.062	135.087	164.591	149.777	132.702	132.84	168.719	141.666	146.581	127.975	149.459	146.854	157.592	117.015
ANKS4B	125.969	118.978	124.086	117.698	123.031	118.714	127.549	121.853	116.788	118.279	114.684	112.751	131.695	113.376	113.626	117.75	125.569	116.703	118.618	122.847	121.651	125.034	121.268	118.25	117.977	121.958	125.821	123.641	112.829	121.574	124.197	122.975	126.613	113.805	113.518	123.096	137.553	115.901	126.997	121.906	119.736	118.826	136.241	128.456	116.242	118.947	120.213	115.665	121.918
ANKS6	127.377	115.784	120.616	121.017	123.615	117.49	120.975	119.287	113.856	113.909	115.564	118.318	114.439	113.796	121.244	114.845	112.521	118.163	121.716	121.469	120.108	120.309	114.548	126.459	133.797	124.307	120.24	122.275	115.522	115.849	122.258	121.551	118.945	115.358	118.743	114.699	123.124	135.644	117.682	113.607	127.615	118.177	122.51	114.566	119.57	128.585	110.819	125.748	115.975
ANKZF1	165.522	157.36	159.869	159.79	165.549	160.354	170.63	153.695	120.859	183.563	195.407	171.92	161.365	150.88	149.982	148.191	185.281	165.324	161.836	159.557	163.183	158.433	161.135	172.596	149.231	146.026	151.223	159.737	154.152	155.148	190.645	174.806	160.117	153.835	169.137	149.902	154.362	147.492	141.064	153.609	134.982	160.588	150.932	165.797	119.188	158.247	159.166	171.066	144.048
ANLN	125.49	118.191	113.855	123.664	136.843	129.558	120.029	136.294	146.091	141.578	114.585	178.606	126.937	119.89	123.382	123.21	120.189	123.582	129.44	183.844	124.791	124.136	123.282	120.852	121.922	119.906	119.171	187.977	172.725	166.97	180.288	134.485	146.301	154.633	154.884	140.335	156.533	119.832	130.114	141.775	147.888	120.091	123.679	202.201	194.243	140.639	155.275	140.42	153.03
ANO1	120.216	125.189	129.309	127.566	123.515	123.586	131.376	133.791	142.308	125.085	115.26	124.311	122.847	121.394	127.338	128.009	123.892	126.173	123.954	127.889	128.495	132.29	129.319	128.57	123.972	134.019	128.737	122.647	129.922	126.221	118.932	124.963	121.452	125.404	118.814	119.291	118.651	118.2	119.718	132.204	121.638	131.419	125.826	135.531	124.98	131.709	122.927	125.255	148.723
ANO10	174.25	182.961	175.03	179.315	151.357	176.695	171.847	150.294	179.942	183.4	171.399	233.736	190.479	162.73	184.973	158.527	161.248	175.533	175.693	201.682	176.853	204.993	167.69	159.798	158.559	201.019	204.282	235.942	177.043	185.182	191.89	184.172	196.646	168.085	167.994	172.376	180.137	189.131	200.96	189.969	281.372	223.907	307.328	213.442	136.164	170.006	186.663	170.142	141.817
ANO2	149.152	129.093	132.14	135.943	134.793	135.966	139.957	147.9	140.128	136.853	126.13	129.625	125.446	141.071	124.736	129.56	130.258	131.483	122.35	127.11	128.61	137.438	133.144	128.468	136.082	160.124	141.76	125.048	144.713	129.548	128.482	127.707	144.847	138.868	125.671	126.027	139.556	132.415	153.218	137.298	144.674	144.948	154.833	137.236	120.043	118.266	140.14	124.371	129.559
ANO3	111.199	108.076	113.901	112.382	123.925	117.739	116.138	112.799	115.944	117.615	118.316	119.304	111.822	117.661	115.833	121.423	114.578	123.037	114.756	108.596	110.669	114.919	118.459	114.439	110.442	112.238	116.984	111.209	110.992	114.885	113.799	122.362	120.793	105.777	116.024	111.415	115.396	118.872	123.092	124.262	109.524	113.279	114.464	120.097	118.334	114.046	119.453	119.616	123.325
ANO4	115.737	119.473	116.361	117.468	115.875	119.957	114.701	115.542	123.835	114.197	119.362	121.504	117.943	115.519	120.643	118.292	118.528	113.69	111.952	122.508	123.136	126.638	116.59	120.399	115.74	113.261	124.615	113.601	118.8	118.356	116.743	116.192	117.075	115.489	117.219	120.83	112.127	126.611	127.21	113.868	116.318	126.694	116.787	111.091	115.622	125.473	115.397	119.058	113.122
ANO5	118.306	114.637	118.63	115.975	116.68	116.866	110.745	116.807	118.767	117.935	115.774	128.443	120.77	119.784	118.886	118.325	114.615	112.284	123.717	126.403	113.707	124.394	120.662	113.576	121.474	119.586	114.566	114.156	128.12	116.303	120.81	125.137	135.855	125.604	117.897	130.643	120.721	126.132	115.178	124.948	120.365	119.076	129.112	140.573	120.533	118.699	130.345	114.054	117.606
ANO6	845.673	975.941	1230.19	1314.77	802.67	539.288	1044.59	657.574	1105.72	1824.61	1136.02	1292.3	1141.91	1310.58	1233.17	991.465	1063.29	1451.35	1127.41	999.049	848.659	889.169	1127.41	1167.13	985.431	845.447	743.047	1419.47	1061.42	1123.2	698.969	748.358	2387.75	991.192	1270.26	1029.14	1252.08	1196.11	1193.24	2260	1072.33	747.654	719.359	1645.24	265.594	815.264	771.095	886.316	893.896
ANO7	121.696	115.968	113.871	124.96	123.455	123.9	129.177	113.671	116.72	114.86	110.649	120.75	118.969	123.944	127.713	120.832	114.468	117.082	121.27	119.796	118.317	112.348	119.433	117.753	115.401	110.374	118.151	115.363	116.816	112.881	119.528	121.602	123.745	130.054	111.799	109.814	119.814	116.655	117	118.747	119.823	117.656	116.373	127.198	116.702	119.836	116.808	127.297	114.334
ANO8	166.487	150.78	162.413	167.295	160.109	147.482	156.463	173.72	189.751	190.462	235.556	231.461	237.062	192.315	219.464	203.841	199.311	187.145	185.294	228.349	196.452	191.369	176.657	194.937	199.193	168.085	158.374	219.762	180.877	170.953	208.278	206.844	229.968	191.131	206.844	212.398	190.324	191.767	158.738	171.798	149.344	163.756	171.92	183.483	221.009	178.529	154.697	178.38	150.559
ANO9	164.073	173.497	182.839	165.423	153.583	164.573	173.88	154.452	138.552	133.562	186.618	244.963	193.089	192.523	188.928	166.417	177.349	186.452	214.44	189.214	192.98	189.787	193.196	161.022	177.349	162.719	145.053	182.868	145.043	193.589	245.962	176.142	158.574	165.641	196.387	200.034	158.172	169.625	184.812	174.292	162.819	162.291	157.957	196.182	135.703	209.002	150.157	212.622	132.207
ANP32A	153.393	140.363	133.19	172.238	199.893	192.04	156.618	167.352	211.645	220.291	220.194	203.753	215.259	234.727	199.598	232.559	228.668	234.341	251.345	237.504	176.941	209.971	201.421	212.892	227.283	168.81	155.249	358.317	201.177	219.622	307.6	305.388	377.632	306.988	240.069	293.018	277.038	194.42	242.746	292.652	160.806	140.028	173.386	228.459	208.189	225.547	347.383	209.927	262.023
ANP32B	8272.83	8574.42	8673.62	8434.05	8673.62	7324.81	8295.36	7235.08	6651.19	7828.3	7907.27	8142	8011.98	8311.72	7751.98	8011.98	7519.58	6122.41	7711.51	5050.9	7219.1	6492.49	7697.87	7281.36	7646.6	7015.54	7295.37	6089.45	6662.26	8142	7697.87	7132	6577.49	7891.16	8651.99	7535.91	8272.83	8350	7201.11	7268.29	8350	6348.65	6383.18	7075.06	16869.5	7490.07	6688.72	7117.45	5958.66
ANP32C	130.423	132.916	132.267	136.078	150.902	143.023	144.457	157.022	127.169	124.313	156.782	143.638	157.723	151.607	153.683	170.893	170.865	158.032	143.792	159.408	156.453	139.64	183.776	163.992	177.336	137.486	141.371	139.517	128.319	175.854	154.611	175.356	191.677	186.399	166.367	205.656	190.226	147.196	173.399	172.887	143.758	146.486	152.814	137.997	119.375	163.911	177.038	185.665	179.693
ANP32D	118.863	121.563	117.345	119.781	118.988	121.218	115.313	112.427	116.031	114.662	117.465	115.343	116.577	119.748	124.313	117.104	121.763	116.586	138	127.126	111.261	116.553	121.573	117.537	121.256	122.61	113.627	125.137	121.069	124.588	119.651	118.469	115.833	118.074	121.902	119.746	120.628	111.406	113.645	120.088	119.816	118.374	121.131	117.486	130.336	116.088	115.267	121.871	133.143
ANP32E	132.206	133.041	129.441	126.337	126.796	116.808	128.749	132.743	138.499	127.176	137.683	135.282	137.52	130.349	122.212	128.779	132.479	128.679	123.058	132.154	144.439	129.325	125.155	133.438	124.762	130.562	135.475	133.989	135.487	130.264	139.056	118.212	136.25	137.416	138.297	132.737	134.063	127.567	126.983	142.666	132.14	132.101	125.986	138.435	125.3	134.015	135.928	133.935	138.369
ANPEP	428.462	358.755	321.324	559.292	319.638	623.367	320.805	430.729	192.615	150.309	463.862	1193.24	711.187	472.409	461.924	475.937	324.527	557.867	670.81	478.919	638.38	611.619	590.913	491.698	395.989	781.372	837.07	524.12	304.508	679.765	265.065	1000.6	714.562	485.894	232	257.213	395.254	658.313	476.494	721.179	1369.09	1127.41	1704.99	495.607	122.795	692.805	1064.4	680.5	202.763
ANRIL	117.78	128.792	124.132	133.019	124.408	136.645	117.748	122.929	130.501	128.562	123.818	181.743	118.564	124.52	121.708	121.024	126.191	117.095	138.361	138.643	121.381	117.306	128.724	121.947	129.583	156.61	126.699	163.968	129.056	144.986	172.844	119.87	126.677	124.897	120.844	126.522	129.554	138.4	154.071	161.189	303.144	167.151	140.648	167.817	174.869	133.011	146.307	125.143	115.432
ANTXR1	129.497	133.925	127.704	125.119	127.081	129.437	128.387	127.046	120.415	126.596	125.333	126.212	124.52	124.633	126.781	125.518	121.735	120.564	125.315	128.268	129.707	124.26	121.918	130.21	126.354	121.642	124.977	119.986	123.036	125.333	122.423	121.504	121.506	125.974	121.745	118.509	126.875	125.481	128.956	133.576	130.461	126.374	130.704	123.195	144.214	130.31	123.795	122.772	126.764
ANTXR2	926.511	802.291	782.875	764.639	518.503	731.033	907.811	610.505	1002.55	938.961	812.748	989.932	1080.81	890.639	890.639	817.086	821.518	634.269	1075.38	1039.26	678.999	988.796	924.431	839.292	909.396	670.181	574.732	1566.14	1039.54	768.619	807.41	1111.17	1153.67	856.752	985.982	644.091	803.88	752.025	746.884	1065.32	872.597	555.406	585.179	1072.33	960.256	808.501	821.088	896.132	949.258
ANTXRL	129.52	113.193	113.088	117.499	115.691	119.805	120.817	113.656	114.61	114.239	118.617	119.151	117.806	118.276	119.097	118.85	120.133	127.537	119.4	118.273	118.356	132.275	114.901	115.575	113.357	117.145	111.042	118.169	120.615	119.545	120.583	119.888	117.346	120.931	118	129.283	117.971	115.192	113.592	127.411	121.728	118.865	116.032	124.929	119.432	116.251	115.406	109.996	122.428
ANUBL1	135.888	124.24	119.51	121.166	126.864	118.728	127.424	121.171	168.214	162.78	134.116	123.659	142.318	146.436	138.351	137.837	145.808	138.486	139.033	125.276	121.228	137.39	139.064	123.781	131.436	117.765	114.803	143.518	157.957	138.095	155.858	130.414	132.402	140.656	156.695	138.077	127.337	140.961	124.418	126.881	115.108	108.261	110.926	148.785	117.306	144.386	123.778	139.195	128.885
ANXA1	6089.45	3480.13	5099.75	5125.58	4509.33	4068.31	4965.58	3763.15	6977.66	5168.71	7383.45	8933.76	8350	7646.6	7490.07	5897.15	6850.21	4581.46	7550.06	3386.72	5002.03	7061.37	6194.07	6779.26	6397.12	4554.3	3666.42	11421.1	5971.1	5884.12	5918.13	6553.11	5357.76	7579.11	7444.54	4843.61	8731.03	7091.23	5742.42	8914.21	5971.1	3850.41	4454.5	6702.83	16976.9	6142.51	5050.9	5037.95	5519.1
ANXA10	123.534	120.692	128.742	123.459	129.647	127.64	134.534	126.221	138.098	129.565	133.966	131.944	132.838	136.547	131.705	134.686	144.986	150.325	130.167	120.14	128.732	135.043	121.203	130.594	132.137	122.383	117.552	134.75	129.102	115.988	124.344	119.213	129.14	127.266	135.544	118.598	122.378	115.588	120.253	121.074	119.815	120.454	121.525	123.054	120.462	123.357	127.48	119.8	124.267
ANXA11	517.596	551.051	600.234	529.14	552.785	524.684	499.405	423.284	394.282	427.313	498.496	527.73	580.17	541.678	441.821	437.261	478.919	476.89	534.693	396.844	509.069	461.228	476.222	408.695	486.352	519.766	441.746	443.978	306.627	548.5	495.607	498.609	398.635	532.075	441.746	480.894	427.986	420.886	637.754	506.409	547.85	546.063	592.026	562.452	613.305	465.644	534.823	478.919	387.045
ANXA13	117.977	114.707	112.052	117.649	115.447	117.14	118.421	112.398	118.508	117.684	114.677	114.393	118.962	117.918	118.403	122.618	118.28	120.902	116.898	122.483	127.549	120.012	112.283	121.077	119.633	116.954	114.005	113.332	128.983	114.535	113.918	119.359	117.544	119.948	124.018	122.34	116.495	119.602	121.166	116.244	117.098	116.554	118.499	117.219	116.237	119.141	118.17	116.224	118.547
ANXA2	807.41	464.14	1112.65	1136.02	1223.7	1212.42	863.541	1152.79	234.228	198.706	625.059	851.164	989.932	1035.49	820	1297.68	934.435	856.467	736.562	890.639	827.408	530.144	1118.38	928.522	699.609	1736.03	1833.1	444.712	312.092	1186.46	609.09	1274.49	1736.99	1578.71	1134.16	1622.16	1455.08	676.864	1138	926.511	1124.72	1369.6	2698.79	1412.42	526.004	625.378	1231.82	993.57	1684.19
ANXA2P1	602.295	505.262	484.765	528.604	781.557	596.158	529.202	567.215	1343.49	1148.58	769.844	1060.51	1147.02	951.024	899.581	1247.84	1290.55	963.595	1226.36	717.792	938.372	951.453	991.917	1312.57	1100.69	584.382	605.032	1945	1227.78	1063.69	1535.9	1432.74	2032.51	1824.83	1767.39	1678.16	2288.78	2202.17	1585.86	1280.59	560.406	493.479	891.058	2010.85	3710.54	1205.97	724.437	1297.46	1576.3
ANXA2P2	25893.9	25176	24491.4	24223	23142.9	24806.4	25176	25893.9	13695.6	21953.8	23453.2	23394.9	23647.4	24388.1	26785.4	20326.7	23019.7	23694.1	20654.8	23342.4	24283.7	24548.8	23647.4	25975.8	22582.8	23019.7	23142.9	21263.4	20956.8	21507.3	19121.4	25252	21175.5	21915.5	23394.9	24347	22716.3	24347	25556.8	25893.9	22842.3	22541.5	23186.5	18673.5	22217.9	24182	24619	25727.8	23800.5
ANXA2P3	145.866	132.177	158.541	165.733	161.549	139.67	153.11	156.177	183.4	178.573	141.607	154.033	143.444	157.066	157.395	181.028	157.83	169.209	167.656	168.459	175.182	158.637	160.04	175.019	168.752	176.392	167.396	191.838	225.392	190.269	175.87	171.945	197.52	172.43	148.26	159.629	206.297	203.863	189.372	152.742	168.173	172.948	254.772	174.135	449.133	161.365	188.03	191.749	163.904
ANXA3	279.68	158.223	243.015	243.645	439.472	501.801	146.391	192.43	210.83	1028.17	438.436	1772.89	343.699	252.189	142.593	457.582	165.591	442.712	767.137	283.323	194.756	313.153	575.103	450.42	366.321	736.211	175.882	1751.73	411.069	1366.12	1686.63	215.381	391.605	268.678	324.975	664.4	922.507	871.905	781.76	2019.22	2311.47	716.511	664.4	2139.62	1065.32	219.464	2961.25	768.852	304.331
ANXA4	157.278	134.487	139.252	132.954	184.648	163.203	145.917	146.577	299.92	218.037	253.62	222.067	207.684	201.927	224.676	227.481	228.33	247.565	227.857	175.935	176.96	220.343	212.936	229.937	202.513	134.329	150.639	344.928	256.783	194.097	276.244	256.437	324.247	290.504	250.716	280.595	291.776	280.595	190.714	258.82	148.108	135.676	147.126	313.299	279.724	231.969	190.09	217.76	317.087
ANXA5	2540.05	2294.68	3589.04	2994.96	2467.55	2961.25	3013.3	2664.21	2497.58	1183.99	2246.95	2157.59	3410.26	3271.62	3652.69	2319.64	2261.62	3252.52	2408.44	3789.64	2906.38	2652.17	3470.14	3933.32	2777.06	4034.88	4815.66	3597.12	5543.02	4440.35	2185.4	2911.6	3183.76	3933.32	2743.61	3178.55	2599.81	2711.65	2672.26	2283.97	5023.62	3883.08	6424.32	3001.9	1054.03	3359.82	3649.17	3433.92	2737.18
ANXA6	358.041	456.877	343.619	350.905	437.757	358.805	341.558	368.336	288.12	290.599	280.835	273.616	258.439	298.589	300.86	291.3	300.248	291.404	271.669	410.774	365.859	280.425	314.878	352.945	272.554	364.789	405.231	235.901	298.661	273.095	252.89	281.845	220.423	265.701	203.995	313.135	229.212	213.178	330.069	230.089	322.366	424.727	482.331	207.666	308.928	274.87	274.2	301.891	244.031
ANXA7	969.481	815.606	886.759	879.208	847.424	718.243	833.238	695.008	951.524	915.258	898.118	896.598	904.116	966.158	821.27	880.088	828.468	689.337	907.922	480.397	750.226	965.931	989.142	820.538	963.846	786.167	772.502	1061.63	751.169	759.14	733.441	717.227	835.039	1003.08	1177.41	837.807	1181.55	1043.78	881.756	971.939	801.565	715.235	739.05	1094.67	2091.87	841.012	697.322	790.256	881.996
ANXA8	119.361	115.872	115.062	121.202	121.946	120.705	115.589	127.814	118.835	125.551	120.832	117.297	133.388	118.608	116.841	108.771	115.298	120.254	118.6	118.862	116.622	120.377	117.254	119.459	116.44	121.269	119.375	138.716	117.777	117.595	115.259	134.581	168.544	119.134	143.646	125.224	117.581	120.948	124.109	117.821	114.321	133.657	133.016	120.787	114.302	115.766	118.263	119.268	122.055
ANXA8L1	122.11	133.194	117.69	129.859	135.15	131.128	120.53	127.084	135.922	145.866	126.073	133.435	119.68	129.896	137.463	123.928	127.279	117.51	137.268	128.752	127.032	113.564	140.159	120.72	126.799	116.08	124.941	122.588	123.173	122.656	129.435	116.394	138.071	129.083	134.239	119.713	129.618	122.991	131.837	129.089	122.688	132.781	134.301	136.499	172.698	119.526	127.941	131.444	117.529
ANXA8L2	131.877	124.731	129.647	126.267	132.144	136.112	119.108	125.355	136.065	130.645	121.669	120.916	125.494	121.978	119.459	126.197	120.459	124.328	116.777	116.161	120.12	133.38	121.5	115.451	118.501	128.429	125.244	119.559	126.861	125.246	134.426	114.419	127.193	129.089	120.281	120.284	121.756	111.155	117.182	120.12	128.303	135.476	140.41	124.129	112.196	120.525	126.274	122.247	108.54
ANXA9	117.666	121.583	109.996	111.549	108.406	109.765	116.218	116.227	131.724	114.454	108.908	115.015	113.606	115.789	114.59	108.42	115.861	117.914	119.626	119.722	126.121	114.607	119.307	115.335	117.28	115.423	112.463	112.159	131.871	114.414	115.565	112.573	115.611	117.869	119.173	118.43	118.362	118.188	115.692	112.835	115.601	112.37	116.315	111.873	113.819	118.637	113.826	115.261	118.214
AOAH	640.165	568.385	464.942	736.396	606.164	864.812	688.541	634.629	721.754	907.072	826.048	818.202	736.211	767.754	1055.12	882.261	923.634	1199.5	778.495	886.96	797.25	946.082	601.231	862.869	735.114	941.426	676.02	1125.62	848.872	1075.05	641.754	750.839	1100.5	782.42	801.385	681.763	873.682	982.371	643.532	745.902	785.585	697.654	1020.63	641.133	662.604	909.396	826.253	549.422	765.003
AOC2	122.45	131.17	136.264	130.245	130.184	130.006	132.426	140.226	131.315	136.03	124.626	125.915	131.084	130.801	121.336	123.948	126.652	122.49	128.743	123.036	135.337	121.705	130.067	128.501	128.532	129.716	130.846	143.641	130.488	126.387	128.533	130.639	119.496	133.029	121.88	129.569	127.972	126.061	122.377	135.144	127.917	136.26	133.67	130.907	131.551	130.37	127.084	124.746	119.027
AOC3	128.435	116.132	138.028	124.377	130.898	127.427	126.542	125.333	117.765	121.444	137.995	129.64	133.176	137.556	116.661	139.376	122.092	127.076	124.356	123.653	130.588	130.071	129.645	131.987	122.004	127.53	127.24	133.744	123.392	119.378	129.098	133.775	130.961	120.336	124.233	123.208	139.137	128.36	134.788	122.001	135.064	140.148	121.754	125.08	129.085	120.75	143.78	116.825	164.573
AOF2	753.314	872.141	817.086	731.509	746.3	689.231	758.711	676.697	863.541	920.23	627.701	601.96	592.866	615.29	636.662	659.17	664.863	775.869	699.894	665.622	617.454	770.91	627.873	743.826	698.969	717.959	815.869	497.498	655.087	666.318	680.644	640.954	597.48	894.903	571.126	651.755	569.942	537.396	549.422	561.986	641.293	731.685	642.752	652.468	1343.29	680.644	720.478	689.083	531.196
AOX1	109.511	114.824	111.672	113.541	109.071	118.668	108.866	105.672	118.179	123.498	122.742	118.158	124.995	117.592	109.204	119.369	115.034	109.384	109.832	109.89	117.51	117.296	127.537	112.497	117.71	115.195	116.261	119.221	119.519	119.504	113.767	108.941	125.312	129.964	116.62	111.363	114.665	115.074	124.949	124.154	118.233	106.401	111.025	119.561	122.939	117.805	116.213	116.546	116.493
AOX2P	120.903	126.862	129.65	131.143	136.358	133.705	132.696	120.678	130.037	124.578	133.089	126.81	126.932	115.385	144.374	119.702	134.014	126.219	127.152	135.035	117.447	134.417	133.345	117.799	121.671	120.08	120.239	126.163	126.535	126.548	130.221	123.321	124.825	113.656	130.735	130.856	117.723	135.134	139.662	117.863	133.144	129.028	131.558	120.419	151.16	123.966	124.231	131.994	127.023
AP1B1	547.524	450.452	543.875	446.574	439.223	401.139	455.383	391.974	315.213	272.357	377.307	441.351	340.043	356.345	335.632	416.178	402.307	480.219	426.958	280.279	359.759	320.098	367.094	331.69	345.333	575.972	600.023	381.131	332.46	519.975	426.609	413.269	367.787	453.016	414.95	375.489	398.059	414.506	297.683	357.236	567.556	598.632	788.389	399.888	506.434	331.332	528.081	474.954	447.296
AP1G1	480.103	438.454	471.914	503.615	434.813	405.282	458.015	396.307	218.881	209.44	438.485	420.365	487.148	497.446	525.961	604.174	558.388	436.591	545.3	651.418	411.655	449.916	451.492	532.172	522.132	389.84	379.491	492.105	337.451	492.385	360.478	453.197	589.686	597.542	624.806	487.909	381.908	297.187	355.696	531.89	398.289	279.386	315.66	526.917	131.308	521.399	395.836	427.842	586.678
AP1G2	328.487	351.199	357.436	341.545	315.747	341.449	326.695	371.52	368.046	320.891	437.163	558.331	459.211	455.588	567.086	509.054	429.111	469.369	462.401	534.03	447.756	492.613	385.78	455.883	461.551	367.894	396.438	475.277	475.785	502.127	761.921	630.413	495.98	458.556	477.331	575.713	380.718	402.467	538.519	439.275	389.659	432.171	360.419	511.282	123.212	534.099	450.704	420.544	387.96
AP1GBP1	221.478	223.79	223.359	184.865	199.553	174.381	191.711	194.203	185.16	212.236	202.397	156.372	196.51	222.714	217.24	208.799	237.318	204.906	234.576	214.797	206.64	209.367	222.618	228.559	242.179	167.403	191.867	156.253	179.654	211.932	177.672	179.677	187.356	226.197	212.886	213.499	189.961	153.677	193.565	175.663	150.331	166.463	159.005	236.93	247.123	183.332	211.276	207.618	200.332
AP1M1	2104.36	2297.71	2830.63	1996.55	1897.8	2317.92	1961.23	2077.72	845.673	952.563	1492.98	1491.6	1396.97	1479.04	1336.18	1495.72	1676.01	1877.9	1472.31	1001.3	1593.07	1844.68	1695.69	1677.83	1710.57	2770.11	2592.94	963.128	959.118	1783.9	1401.34	1474.22	1106.88	1750.78	1394.06	1787.36	1552.2	1492.38	1735.07	1408.39	2453.9	3032.7	3369	1350.98	1909.98	1298.2	1586.84	1841.88	1396.97
AP1M2	125.332	119.377	126.146	129.351	128.665	123.028	122.004	124.641	130.255	129.301	118.373	131.999	125.782	121.685	123.901	119.067	133.791	122.996	141.714	126.494	122.305	129.631	125.774	134.894	120.991	124.802	124.802	121.466	118.611	134.47	137.95	123.218	137.094	117.702	125.06	122.693	123.218	132.001	124.083	140.883	117.093	125.374	120.22	139.445	119.09	128.66	144.307	126.5	133.038
AP1S1	282.438	249.292	307.833	291.307	317.023	267.271	325.433	360.597	121.124	118.671	249.725	269.728	233.312	238.48	265.64	215.933	216.485	213.221	219.37	276.916	297.341	203.446	305.046	232.584	248.417	392.42	342.964	173.002	131.451	274.958	227.857	330.54	263.42	298.339	287.267	307.118	313.507	250.464	262.603	238.667	329.741	428.768	605.892	197.797	110.907	267.633	241.091	243.774	265.333
AP1S2	5351.93	3297.41	6085.57	5310.58	4262.07	4471.67	4254.46	4043.52	4571.51	3268.69	4152.94	4902.69	6362.33	5356.78	6674.44	6895.89	5881.41	5557.29	5681.57	2816.01	4068.16	5505.18	5654.7	5258.9	5190.06	5686.19	4407.55	7034.5	5578.29	4874.47	4250.6	6139.07	5474.76	6075.49	7789.64	6291.22	6261.88	5094.89	3883.96	4464.85	5062.73	3940.83	4191.32	5226.91	7062.96	4936.5	3351.39	4847.84	6051.45
AP1S3	120.166	115.762	119.842	128.259	117.604	123.952	116.896	119.221	122.076	120.486	117.046	119.755	115.207	122.933	120.678	121.961	114.684	122.199	116.436	120.767	112.154	125.247	123.325	117.562	119.836	116.232	115.339	122.604	115.609	120.143	121.199	116.882	124.611	123.934	130.344	118.641	124.632	122.164	117.81	119.271	118.817	121.063	116.88	120.953	115.686	118.309	117.845	117.923	137.707
AP2A1	150.494	148.87	139.028	134.939	150.707	140.696	154.466	147.828	115.791	115.8	195.373	240.436	193.218	199.04	204.73	160.389	162.565	200.431	167.608	184.111	190.917	190.898	172.327	172.154	165.423	161.322	171.566	170.865	127.383	185.677	187.161	214.654	164.253	153.476	163.284	184.042	149.136	297.892	167.333	192.24	195.623	185.199	257.475	188.24	120.822	213.289	165.282	184.392	139.65
AP2A2	193.162	247.924	202.745	199.565	194.405	201.038	216.578	191.571	164.708	193.723	195.901	239.633	197.086	206.611	220.654	202.859	186.214	227.26	204.406	259.975	205.709	233.053	200.181	188.601	197.52	195.39	190.324	178.923	177.665	225.585	248.39	268.386	221.059	188.892	207.771	201.421	162.344	253.555	192.411	182.261	212.759	222.287	236.812	192.523	130.853	218.61	185.677	209.579	142.295
AP2B1	368.485	427.111	363.858	344.83	339.2	352.649	394.739	357.866	138.937	126.823	246.562	324.928	283.842	247.444	290.317	324.351	313.518	286.112	247.094	461.713	349.541	376.231	314.744	338.733	326.643	351.101	344.624	218.333	158.281	279.748	501.812	372.424	284.391	260.85	324.252	297.549	305.57	452.874	346.444	266.067	547.213	399.924	361.62	162.412	122.735	393.101	242.653	275.947	247.49
AP2M1	751.286	841.978	895.731	894.361	822.26	903.357	868.169	845.579	915.957	680.281	798.106	1028.48	845.978	839.005	1018.13	727.522	711.592	1014.39	785.046	1590.66	1043.72	1011.8	988.507	960.386	881.298	1149.59	1112.57	894.041	1102.5	954.702	994.955	1027.77	887.182	747.304	754.458	936.956	904.031	1663.64	1272.14	950.21	1274.54	1333.87	1503.79	875.833	245.952	1018.13	677.63	806.271	670.238
AP2S1	3892.87	4674.97	4487.68	4850.93	4164.57	4680.8	4096.19	4212.08	2692.99	2709.38	4297.79	4521.18	4453.03	4113.01	4595.27	4223.49	3395.81	5506.55	4883.5	4501.65	4393.6	4527.71	4446.08	4686.69	4288.73	5577.19	6334.23	4631	4329.05	5381.09	4381.77	5819.27	4592.26	3559.63	3650.07	4266.38	4414.84	6184.7	4910.7	4927.13	6626.92	6024.23	8685.29	4042.36	6539.84	4719.86	4522.65	4649.23	3654.24
AP3B1	1757.23	1653.43	1676.69	1699.72	1316.73	1473.51	1668.66	1669.47	1781.88	1705.83	1965.3	1841.88	1937.18	2085.15	2166.42	1889.42	1881.14	1632.44	1722.99	1678.94	1471.68	1769.28	1911.06	1950.01	1973.82	1651.98	1645.85	2143.03	2211.83	1682.35	1670.27	2031.88	1898.86	2027.3	2010.84	1948.45	2109.72	1637.6	1529.79	2355.81	1660.18	1284.13	1454.01	1829.15	1830.24	2138.38	1698.74	1568.36	2427.38
AP3B2	115.385	121.79	118.406	114.634	120.49	122.117	112.153	124.999	120.298	133.194	113.212	116.773	122.513	125.508	117.611	108.31	124.437	113.694	115.739	117.204	119.469	122.244	119.401	113.82	121.778	120.228	121.372	113.446	128.518	120.873	119.298	119.739	127.452	126.656	118.35	120.605	116.581	132.447	162.335	119.051	119.026	119.069	122.178	120.081	121.186	127.846	132.424	116.783	123.226
AP3D1	494.354	466.58	473.217	405.269	401.657	401.433	408.293	411.669	413.519	393.219	481.431	495.607	451.096	432.203	484.903	479.828	402.216	489.731	431.135	447.186	539.709	441.305	413.225	434.286	458.551	491.437	573.115	473.217	591.793	442.218	457.582	503.783	435.832	487.567	399.073	473.56	423.204	428.535	476.305	389.756	515.957	549.164	632.016	381.424	173.469	505.685	433.278	538.803	420.661
AP3M1	627.158	542.018	550.239	486.531	485.894	427.142	501.038	434.973	609.211	605.291	558.009	535.369	532.821	539.928	558.733	556.006	546.864	446.909	498.397	380.338	375.337	434.06	410.841	492.112	413.59	393.755	368.047	886.316	808.501	499.595	607.433	482.823	606.021	487.005	747.848	513.618	509.069	580.434	388.643	453.111	454.897	327.02	374.937	709.52	174.062	582.746	431.135	462.106	749.738
AP3M2	540.838	619.115	733.055	506.773	401.796	365.793	523.512	422.35	515.545	740.551	510.157	616.91	441.305	447.615	397.27	391.605	414.281	385.425	435.753	423.284	484.903	474.708	540.838	517.386	593.731	366.044	362.82	334.128	429.215	433.62	477.098	353.499	388.411	562.102	491.815	420.573	390.887	333.381	686.217	389.959	447.365	384.11	227.233	478.045	1033.79	571.654	417.578	756.816	330.731
AP3S1	704.039	591.557	635.065	661.214	756.618	745.03	640.324	686.217	997.246	633.659	621.937	928.522	771.54	750.119	874.462	871.642	645.077	732.29	722.874	441.378	660.16	710.35	861.704	645.37	665.149	694.751	598.579	1204.73	1207.6	921.936	684.598	699.284	818.202	741.256	842.558	896.373	1035.78	647.547	783.304	937.197	837.486	588.861	713.926	1337.32	226.414	627.158	759.959	579.306	711.978
AP3S2	201.802	178.147	223.654	206.611	182.471	185.762	198.511	197.34	208.849	196.946	162.365	180.001	171.58	181.351	181.224	156.878	177.142	162.898	161.941	220.932	199.856	191.47	186.988	195.256	180.783	248.081	220.781	198.243	187.103	199.311	184.586	186.383	163.044	154.64	174.539	176.533	186.347	183.054	179.105	169.183	255.586	218.964	310.788	202.592	208.823	177.113	210.883	199.52	168.351
AP4B1	1805.43	1427.32	1460.12	1558.73	1367.68	1273.24	1558.73	1313.69	1266.9	1575.58	1292.77	1341.43	1231.82	1188.62	1163.38	1260.11	1536.41	1126.63	1291.37	992.096	921.708	991.465	921.249	1005.95	1056.09	1125.94	1045.63	843.923	1308.21	1076.53	1421.62	1037.14	698.672	1381.91	1231.06	952.563	861.398	786.745	838.791	818	1008.02	874.689	897.648	1126.63	1569.97	1308.21	1071.22	1145.23	1346.71
AP4E1	499.595	477.259	475.216	489.827	491.437	520.011	525.677	583.167	739.406	614.144	484.009	523.01	556.098	465.032	554.99	618.502	572.413	478.815	496.5	485.27	461.924	410.916	427.751	485.989	439.808	522.095	536.134	613.997	707.831	549.041	405.082	534.386	626.562	482.134	481.611	361.055	475.659	391.241	386.486	442.868	473.127	389.146	448.95	512.993	484.179	656.2	598.061	688.883	594.609
AP4M1	139.028	126.171	137.97	130.766	130.268	135.18	135.758	134.029	144.805	126.869	148.16	128.326	140.868	128.086	139.685	131.73	129.563	146.839	133.54	153.043	139.511	134.426	142.348	132.909	138.651	130.525	134.541	151.172	161.952	135.845	150.475	136.236	137.556	144.717	152.875	137.619	145.005	144.352	124.353	135.933	141.856	138.082	161.459	141.753	113.989	136.927	134.287	144.126	132.335
AP4S1	137.461	141.329	127.321	134.59	132.248	127.276	132.702	134.565	124.231	120.911	119.886	131	119.531	131.091	121.579	132.232	138.223	126.856	135.112	131.648	124.509	128.608	127.901	132.993	125.324	130.275	129.08	119.665	132.329	130.638	134.958	125.966	128.61	129.607	121.967	126.996	122.415	114.296	139.359	125.818	133.039	142.071	127.118	122.955	130.073	130.439	123.044	129.726	115.671
APAF1	574.439	446.738	569.789	595.164	501.831	597.98	494.421	511.482	811.595	603.314	411.966	852.238	721.542	606.753	534.801	743.51	572.375	582.125	742.286	353.431	400.555	538.592	445.588	565.862	422.369	723.685	544.912	1821.33	708.129	672.859	639.563	705.084	929.239	680.638	713.733	433.712	655.794	491.903	353.476	525.549	664.36	409.826	587.012	963.337	1730.63	657.711	713.597	551.182	845.055
APBA1	118.391	114.307	116.576	115.501	119.732	111.746	119.582	115.738	110.981	116.311	121.52	120.749	121.584	116.15	118.965	116.511	117.477	114.942	119.769	116.623	118.474	117.832	112.972	122.543	115.763	116.807	114.792	119.293	113.273	114.6	116.636	115.595	109.476	113.768	118.498	108.854	120.198	117.64	126.173	118.968	113.873	112.679	116.451	116.043	115.147	114.633	109.299	118.938	121.27
APBA2	170.031	195.218	165.226	168.445	200.842	165.076	147.342	183.422	222.891	281.073	228.536	173.497	167.132	193.105	161.566	161.413	175.834	159.236	158.972	158.072	245.745	235.356	181.502	197.742	188.109	145.338	154.445	163.103	178.021	145.769	163.665	133.234	145.188	142.992	160.451	152.782	148.507	168.81	189.271	146.745	121.923	167.419	120.222	150.283	118.939	166.306	139.93	164.041	121.079
APBA2BP	126.785	128.038	136.061	125.126	133.708	126.285	122.644	131.521	115.069	127.164	125.402	132.283	120.873	126.291	122.218	126.385	126.927	127.045	127.39	140.648	134.717	128.86	127.296	129.092	133.214	130.567	139.661	133.203	124.638	138.878	128.515	128.502	124.232	132.435	122.993	129.628	127.809	125.678	129.907	128.995	127.859	136.134	130.061	128.295	134.562	124.444	128.932	129.314	137.391
APBA3	597.48	555.881	683.34	576.249	536.8	609.09	593.967	676.02	404.233	398.847	603.062	633.957	568.529	571.126	633.82	458.957	491.698	567.157	518.074	736.211	852.095	663.865	632.447	668.791	563.677	712.851	870.404	380.884	487.486	623.202	659.17	746.486	332.642	500.947	533.769	665.522	497.125	615.29	809.992	507.478	763.212	1095.03	819.031	455.827	488.241	665.904	700.696	648.157	587.735
APBB1	125.966	125.314	122.892	127.54	124.027	127.691	117.419	120.385	117.764	123.153	126.543	120.785	119.904	116.094	126.756	132.302	121.913	123.076	124.463	132.049	137.114	126.818	122.628	126.777	119.674	123.91	122.515	115.717	118.619	118.275	125.162	120.042	120.724	126.114	132.612	128.838	117.84	121.369	125.011	124.361	114.445	121.39	113.735	124.984	122.277	130.207	121.734	117.576	129.603
APBB1IP	1396.97	1356.21	1510.59	1419.47	1242.14	2033.5	1327.27	1699.72	2870.62	2715.5	1928.78	2045.98	2157.59	1765.09	2112.18	1956.31	1799.25	1864.47	1764.03	1403.03	1558.73	1526.57	1586.04	1643.54	1717.71	1619.9	2037.06	4198.24	3621.44	1946	2029.77	2477.83	1608.49	1724.74	1875.91	1794.22	1507.96	1626.3	1520.23	1818.64	1916.52	2171.92	2473.07	2373.05	3962.44	2427.38	1788.25	1693.13	1622.16
APBB2	116.26	119.784	116.344	117.96	121.217	120.094	119.1	121.09	122.555	126.888	117.219	120.706	114.622	121.916	118.965	117.307	120.996	124.79	121.45	120.393	123.651	114.963	121.659	117.949	121.532	114.994	120.329	118.574	124.553	120.451	124.756	122.704	118.563	120.382	119.169	120.301	121.124	121.162	117.61	131.742	117.967	123.206	127.47	122.272	125.405	118.762	123.648	121.163	119.755
APBB3	650.436	581.613	848.572	722.692	553.444	698.426	695.368	618.962	607.526	796.701	977.305	1030.46	952.272	829.918	944.473	902.335	795.942	900.206	877.465	805.374	840.433	753.375	730.104	799.289	779.789	770.61	696.974	754.995	705.455	875.665	796.929	949.2	868.829	898.04	889.532	850.888	561.153	509.649	723.242	685.867	772.119	672.114	622.369	739.816	775.976	834.155	1084.06	863.98	739.444
APC	124.412	133.767	138.591	127.227	118.278	130.371	132.401	129.322	136.555	136.248	119.713	115.121	128.226	127.244	129.682	134.111	132.631	125.952	145.719	123.839	112.977	126.895	121.718	117.62	122.923	142.518	128.671	121.841	134.275	117.953	124.678	122.733	122.975	121.048	124.49	122.698	114.479	124.689	125.418	125.786	133.748	124.971	131.78	120.829	126.422	124.876	128.475	124.898	135.708
APC2	110.712	114.544	115.324	112.953	122.687	115.022	114.919	123.794	116.378	118.05	109.689	111.735	119.664	117.123	117.121	120.887	112.906	114.965	118.812	112.13	133.807	124.495	115.676	121.082	114.253	117.031	125.38	114.793	117.526	115.722	117.953	123.301	120.022	109.05	122.436	130.219	119.751	125.62	121.825	121.93	119.227	114.218	123.543	119.942	113.049	121.613	116.261	119.697	120.369
APCDD1	153.497	139.469	154.595	148.42	138.826	141.63	143.477	132.837	166.66	139.465	160.083	162.759	166.417	143.204	159.898	143.2	143.11	140.713	143.24	136.545	147.461	154.303	139.88	134.881	138.994	146.782	136.588	195.839	145.351	152.735	165.076	160.678	171.993	140.423	150.723	148.345	145.981	151.165	133.616	156.035	140.252	153.873	289.724	153.393	126.021	179.2	133.52	146.929	126.677
APCDD1L	123.408	115.523	126.594	119.625	129.618	120.247	128.147	126.965	118.456	116.789	120.879	120.371	119.972	130.22	117.248	119.101	121.262	126.047	122.524	117.805	124.871	121.396	126.535	124.019	122.657	120.883	120.44	121.851	127.35	123.953	123.659	113.729	124.836	120.246	129.432	122.023	118.001	113.381	116.207	120.7	124.041	115.467	129.026	116.656	161.031	118.398	119.282	124.364	122.744
APCS	126.537	135.642	119.556	140.189	129.689	130.139	124.346	124.396	124.797	120.308	120.218	121.378	122.567	126.921	131.357	129.37	120.787	121.182	126.804	122.188	115.564	122.336	127.097	115.98	125.061	124.898	122.403	122.016	126.677	123.7	121.996	122.072	123.293	126.34	127.019	128.231	122.787	115.021	122.514	120.967	124.138	123.931	127.299	120.344	142.716	121.964	129.371	127.236	122.654
APEG1	142.698	132.219	144.704	136.478	144.377	149.088	139.328	134.837	143.901	147.482	120.552	128.627	125.998	138.393	128.299	126.226	152.553	144.709	128.984	137.438	146.934	138.419	141.568	122.779	136.118	134.167	135.797	118.011	131.559	132.506	132.931	131.774	141.228	139.984	139.423	133.471	131.25	131.199	140.465	130.025	161.04	133.887	141.052	139.489	159.401	131.638	148.08	134.563	145.191
APEH	1061.07	1156.07	968.113	992.096	1197.84	1113.02	1080.81	1249.92	1175.4	1199.95	1177.79	1431.74	1084.13	1111.17	1128.53	1215.68	1061.42	1423.44	1205.18	1458.24	1292.3	1116.2	1169.19	1062.88	976.272	1321.16	1343.94	1053.35	1162.94	1404.91	1432.22	1425.98	974.44	1064.67	1019.04	1246.85	1068.84	1607.73	1316.2	942.651	1193.24	1586.84	1540.04	1113.02	247.632	1153.67	1052.37	1164.83	1053.02
APEX1	1699.17	1659.61	1566.61	1771.87	1825.16	1592.99	1693.71	1523.02	1758.7	1931.24	1915.8	1787.78	1588.38	1971.18	1895.97	1794.04	1594.96	1535.09	1645.03	2253.33	1970.97	1658.13	1875.77	1576.83	1704.84	1717.84	1712.15	1306.41	1528.24	1649.11	1614.1	1679.15	1562.98	1368.94	1578.16	1820.61	1611.06	1769.55	1902.87	1338.05	1351.99	1830.42	1259.16	1742.22	1052.41	1649.15	1259.86	1861.9	1215.87
APEX2	367.978	369.795	384.582	377.928	408.123	414.356	369.877	445.488	351.356	314.781	536.8	494.656	446.582	505.397	516.929	401.583	395.79	447.365	381.279	436.918	551.62	380.942	440.51	454.662	316.604	441.963	567.157	391.316	422.809	524.492	412.356	501.511	328.113	360.841	419.085	498.006	437.457	480.119	500.274	361.996	540.747	717.227	766.732	328.69	842.558	483.385	461.831	437.853	480.579
APH1A	731.894	852.327	784.748	714.051	756.768	776.465	752.877	792.875	509.419	331.97	624.26	697.749	646.778	632.249	685.029	614.611	566.878	634.39	477.507	1388.91	783.789	935.432	832.978	646.59	733.392	893.827	853.328	662.904	775.944	629.573	619.691	879.94	902.392	636.904	635.198	738.899	724.05	1024.76	706.406	681.027	628.236	1010.26	1090.92	442.55	118.754	920.515	583.265	685.858	642.074
APH1B	355.67	375.54	361.601	444.18	400.595	553.349	378.511	466.114	488.832	472.317	349.925	464.14	470.225	422.809	411.747	380.494	318.316	502.013	421.453	439.21	460.02	490.786	430.25	444.605	409.749	652.175	660.16	513.316	461.736	561.841	350.197	537.274	441.378	334.279	303.269	404.998	495.065	547.294	562.559	633.82	672.133	670.325	960.256	455.426	679.308	451.997	634.775	504.729	351.467
API5	1183.18	942.894	859.018	893.896	856.04	618.366	869.319	717.394	1091.13	951.709	1030.61	1080.2	1123.2	1184.66	1272.27	926.292	899.463	664.552	726.101	877.731	845.447	1036.83	1057.99	1099.75	982.371	582.381	565.991	864.812	921.454	858.832	885.306	1036.83	685.77	836.583	1034.56	1001.3	720.837	751.219	859.245	822.178	752.025	510.269	440.85	787.449	905.633	1157.91	595.535	820.854	855.515
APIP	361.621	322.013	345.134	369.821	417.528	341.162	373.038	436.784	472.858	390.561	364.249	398.497	443.328	518.846	453.452	370.999	363.402	332.468	407.668	361.705	423.035	351.325	380.339	414.106	351.625	343.412	367.272	553.629	654.616	469.822	409.855	360.456	482.282	426.123	473.967	506.559	517.153	375.262	365.056	383.868	343.743	339.198	343.67	509.209	207.046	432.286	414.587	397.234	434.378
APITD1	149.44	150.735	151.309	157.339	177.487	147.263	164.187	186.07	165.553	174.135	152.338	156.945	152.791	157.025	146.274	156.222	149.728	148.194	150.072	174.921	155.666	141.968	164.472	152.906	137.04	151.693	160.343	157.233	192.331	156.501	167.903	150.257	147.815	166.444	155.455	156.218	166.114	145.498	155.462	150.373	141.109	142.091	145.25	160.734	124.778	154.5	156.053	151.771	139.193
APLF	134.899	120.655	129.717	128.228	127.817	122.847	126.665	131.749	124.894	129.981	133.088	138.485	148.064	122.232	119.291	126.719	123.14	116.113	118.033	125.778	128.769	120.909	127.813	128.937	134.996	123.341	130.554	125.499	125.325	131.247	115.618	120.35	123.898	125.952	124.173	122.025	124.337	122.649	124.542	126.965	123.25	124.48	123.755	121.744	153.493	121.996	124.532	128.762	143.495
APLN	129.322	135.433	126.44	128.526	120.281	124.016	130.633	127.945	133.92	125.079	120.511	118.526	116.579	125.611	136.903	133.608	125.831	118.803	126.156	123.173	111.133	128.752	123.912	131.74	121.653	126.363	136.286	115.456	129.403	124.748	132.986	126.206	122.091	126.83	131.35	128.95	126.518	123.377	116.9	131.318	139.677	119.149	124.131	127.235	115.654	116.508	128.158	127.796	121.719
APLNR	113.818	126.148	123.477	116.677	109.444	122.449	119.82	114.556	119.347	121.457	119.593	120.998	114.363	116.12	119.918	126.365	115.402	117.303	122.208	117.469	110.107	111.923	121.321	116.223	113.35	114.842	119.427	132.795	116.534	111.18	121.571	117.734	117.586	114.231	119.072	114.878	114.919	114.961	120.6	115.742	118.645	114.835	111.843	130.505	133.147	120.512	122.34	115.953	123.811
APLP1	131.148	125.335	127.562	127.591	124.091	127.497	124.723	129.969	125.452	126.338	124.111	121.229	127.215	127.462	125.441	124.521	127.78	129.548	120.562	124.761	124.777	121.917	124.652	124.581	120.265	129.587	125.216	119.164	126.61	128.134	123.812	128.494	125.572	118.858	119.742	123.554	117.454	122.341	118.577	123.139	125.689	122.376	124.124	126.078	133.61	123.879	120.177	132.027	125.599
APLP2	363.237	317.49	458.993	491.594	297.706	523.406	418.068	390.653	497.755	365.053	475.7	623.553	537.429	526.613	650.775	495.54	423.999	665.125	555.795	681.065	479.066	652.807	503.887	627.674	560.64	672.37	555.517	875.604	849.538	456.624	336.506	798.412	764.931	419.792	417.808	460.543	485.226	586.428	582.748	574.557	692.367	574.843	973.682	659.947	165.445	691.834	486.935	533.368	513.293
APM-1	128.964	124.56	121.069	117.15	125.505	124.605	124.314	121.359	125.636	121.798	130.057	117.774	127.743	128.245	136.553	130.928	125.525	126.524	126.668	118.915	120.869	114.982	118.645	128.292	126.555	123.54	116.22	135.819	124.202	120.995	125.102	124.798	118.749	110.796	118.719	123.08	121.553	122.757	119.63	134.107	121.449	119.243	123.549	115.752	126.876	124.459	124.93	119.576	117.636
APOA1	139.033	132.843	123.662	130.834	147.136	122.579	146.267	130.086	145.55	131.204	127.378	135.006	120.969	116.71	125.975	123.53	123.385	118.475	131.337	128.082	118.93	122.008	134.372	116.971	128.385	134.265	163.863	119.448	121.621	122.038	129.674	125.829	123.625	128.287	117.052	132.012	125.619	136.449	124.337	125.326	124.575	119.424	128.048	113.555	172.664	124.963	119.66	124.099	124.861
APOA1BP	628.004	861.129	651.755	697.174	870.662	848.4	713.623	935.364	547.972	495.065	835.193	699.894	609.211	802.04	757.271	673.46	719.208	790.876	690.834	1074.77	1002.55	740.197	863.299	782.208	701.304	914.042	975.652	582.888	702.737	848.4	937.461	861.964	601.848	605.752	536.631	948.917	696.419	869.941	1011.97	593.869	741.869	1263.93	1063.29	617.595	272.382	913.31	636.38	794.313	543.452
APOA2	120.895	121.538	119.083	119.027	119.165	121.098	115.032	125.174	173.829	132.644	123.15	111.225	123.332	118.616	125.315	110.937	121.263	117.868	124.951	127.783	118.159	132.99	115.388	122.831	123.578	115.348	127.034	122.313	126.375	117.26	125.705	117.224	122.698	115.683	119.004	120.244	129.149	119.908	121.63	117.787	122.222	111.848	117.423	112.64	128.695	116.55	122.345	116.272	119.785
APOA4	121.426	133.366	111.383	114.821	126.821	116.701	113.991	119.428	114.862	122.359	125.483	116.602	120.054	121.715	130.535	113.193	125.861	119.11	112.928	121.346	117.597	113.395	128.464	120.883	120.041	116.479	117.605	111.021	112.384	117.394	117.984	126.575	123.601	121.567	115.198	119.461	117.248	114.195	122.118	123.23	116.692	119.641	116.407	116.574	121.35	118.549	124.081	118.015	116.432
APOA5	125.778	124.461	118.245	132.355	129.239	130.352	118.097	131.493	144.476	117.906	127.327	135.612	121.952	115.641	127.745	124.001	125.281	118.338	116.958	127.866	129.174	114.589	128.699	121.603	129.837	125.529	120.355	117.362	130.546	130.786	120.599	116.785	127.642	122.101	119.001	125.604	127.651	114.314	125.347	113.818	128.093	121.889	135.004	121.777	122.504	118.122	129.732	118.382	208.359
APOB	118.695	113.301	110.24	115.329	114.223	117.782	109.666	112.844	130.877	115.213	111.829	118.188	113.25	113.797	107.599	113.709	117.371	112.341	117.016	118.55	109.791	115.167	116.547	117.847	119.221	114.229	113.749	118.637	120.217	113.893	113.743	112.382	122.071	121.663	112.834	115.811	115.232	119.555	114.162	112.839	111.649	110.824	122.225	116.515	120.87	117.264	112.858	109.439	107.447
APOB48R	287.12	288.54	303.466	314.291	339.174	504.919	326.079	326.402	280.914	169.348	371.761	455.426	461.461	361.932	354.487	346.163	317.587	451.096	339.992	409.374	446.677	438.009	344.067	306.664	307.277	471.67	409.374	525.909	493.535	415.562	303.882	480.511	386.486	273.535	288.725	293.402	315.33	264.401	265.366	370.566	383.208	483.03	794.313	342.159	132.977	372.98	705.459	365.232	400.005
APOBEC1	115.556	128.59	125.055	126.016	129.435	126.119	120.387	130.779	123.732	118.679	115.191	119.549	120.338	124.162	118.037	119.939	128.531	127.031	112.789	128.446	118.707	137.344	122.02	117.381	117.305	128.946	128.402	119.963	120.935	126.903	124.941	120.416	125.463	129.246	121.61	121.889	119.882	117.386	117.858	117.016	121.823	125.013	122.225	129.923	134.616	113.443	115.197	119.633	119.208
APOBEC2	115.379	117.199	113.635	116.505	114.674	115.989	115.017	118.381	124.54	119.679	123.012	109.489	120.534	122.985	115.577	115.104	116.933	133.609	116.775	123.838	120.311	109.397	118.85	120.537	117.889	114.732	112.786	119.083	115.973	119.287	115.928	116.053	120.155	112.451	113.958	112.916	116.981	114.64	117.491	117.913	124.58	111.431	117.056	115.347	122.767	116.452	127.126	123.79	113.927
APOBEC3A	144.922	153.022	129.717	145.428	148.384	137.072	118.733	149.729	232.133	289.914	125.996	189.234	284.06	187.957	197.871	272.887	245.423	221.009	175.602	179.105	171.76	195.901	221.744	361.161	199.893	117.951	115.122	763.042	158.559	163.051	264.934	115.532	431.742	172.775	383.208	248.661	434.212	126.233	295.438	261.436	151.231	130.427	123.104	120.091	878.749	280.357	213.08	157.792	416.286
APOBEC3B	118.156	117.232	126.481	147.352	203.039	142.397	110.763	370.048	115.118	122.46	119.416	145.405	149.853	126.756	113.801	132.426	133.39	124.778	124.369	381.487	125.874	124.983	131.908	133.392	126.902	121.045	110.853	138.497	195.822	140.968	192.677	110.857	162.385	147.096	146.849	155.669	217.888	115.9	149.636	120.093	140.933	171.606	143.508	115.585	131.562	157.269	214.275	133.388	214.489
APOBEC3C	262.997	253.494	265.79	279.057	291.307	336.047	259.688	372.399	245.458	238.26	275.589	329.258	267.794	268.32	324.975	235.612	236.031	267.385	245.745	515.428	342.637	271.166	259.845	305.691	232.446	335.93	359.321	222.219	249.627	275.787	275.669	295.836	245.458	231.409	204.793	312.764	245.828	337.827	317.481	245.716	269.608	312.502	415.483	202.71	304.761	330.173	248.839	261.28	246.617
APOBEC3D	260.97	272.489	236.438	235.728	288.018	249.202	233.538	321.909	161.998	179.627	214.488	179.104	196.279	201.041	208.928	176.87	193.153	296.719	233.295	289.053	209.919	203.066	198.499	183.408	190.537	251.007	329.769	154.617	196.041	207.965	249.597	221.285	171.255	191.12	167.09	175.456	176.995	166.132	185.95	184.66	228.357	228.208	244.612	172.739	185.597	190.814	260.918	226.901	238.585
APOBEC3F	370.263	383.022	381.668	359.285	381.339	477.972	393.118	389.966	218.134	203.69	303.835	258.85	241.453	307.999	362.35	259.34	265.654	290.804	286.403	267.622	296.645	252.078	269.118	261.935	264.215	469.55	439.668	232.645	230.2	352.601	330.402	360.321	320.722	280.823	293.779	358.933	315.278	278.979	306.842	301.687	378.531	429.689	428.526	283.348	312.668	286.603	352.435	330.535	372.462
APOBEC3G	1883.44	1747.09	1322.7	1609.66	2422.33	1528.98	2030.75	2388.03	552.005	316.433	1602.63	816.238	1095.85	1449.35	1396.32	1305.73	1700.38	1236.97	1225.01	1677.76	1210.17	855.383	1425.26	1220.94	799.617	1169.56	1592.86	682.77	1178.11	1637.97	1231.09	1269.82	1050.23	1334.55	1222.4	1765.5	1590.02	1169.76	1157.08	769.212	711.128	1172.53	1028.84	840.227	170.42	1072.64	1208.62	1031.66	1910.7
APOBEC3H	285.225	271.707	211.056	223.428	363.126	269.102	282.681	340.406	241.672	228.33	243.495	188.063	205.548	217.865	211.145	163.839	217.053	246.981	195.024	316.407	251.109	226.929	251.926	216.602	175.984	220.413	409.886	209.255	306.523	467.708	224.329	306.579	202.53	393.486	191.818	270.56	353.921	237.062	210.745	244.274	180.669	234.511	265.87	167.151	806.782	289.367	347.543	251.235	211.371
APOBEC4	116.446	118.24	125.845	112.777	114.382	116.91	114.535	126.598	120.799	115.822	119.139	123.601	118.467	112.278	120.85	116.853	115.988	123.067	122.711	111.145	116.965	128.975	116.302	117.594	112.811	112.165	119.408	118.094	120.429	108.622	123.672	118.388	113.712	121.854	111.068	113.502	125.338	120.23	115.541	128.218	121.471	122.814	116.263	121.501	121.742	121.238	121.974	111.647	134.266
APOC1	130.023	134.051	133.414	141.852	135.418	140.573	134.333	129.082	143.354	136.413	121.452	122.011	125.968	127.093	129.605	126.803	128.8	124.25	133.348	139.244	129.141	134.127	129.92	132.722	134.138	126.624	134.376	135.323	126.437	134.24	128.784	123.881	131.249	123.984	133.557	127.405	124.525	133.169	130.85	137.931	143.182	147.316	142.662	127.617	169.715	128.439	133.283	128.839	164.77
APOC2	123.869	126.417	135.069	130.871	129.86	127.324	132.803	133.93	125.574	127.615	120.9	133.812	127.45	120.995	125.391	124.298	131.225	134.176	125.008	135.008	121.373	125.514	140.831	127.429	122.999	126.819	125.21	127.718	131.615	121.276	130.965	129.982	126.152	134.043	128.72	122.463	116.086	136.266	116.444	138.475	134.901	130.847	120.214	125.272	122.424	117.94	121.223	117.855	122.4
APOC3	115.896	128.769	113.879	124.668	118.008	118.707	125.037	118.678	124.012	130.912	117.14	120.523	115.021	116.493	122.289	127.55	120.967	120.614	116.215	125.49	122.136	117.4	119.493	123.296	109.571	116.555	123.703	102.567	137.942	119.791	119.325	125.386	115.252	123.997	115.043	117.559	121.492	118.936	122.814	127.263	123.303	114.658	123.208	118.882	118.559	116.871	117.953	117.056	114.417
APOC4	119.984	116.516	128.188	112.566	116.886	122.597	121.556	122.568	129.397	131.744	115.348	124.578	116.309	131.904	135.265	119.02	124.323	120.94	113.885	120.377	127.388	122.895	119.213	126.338	119.768	124.056	119.888	129.743	126.286	116.411	121.69	121.583	119.338	119.766	123.151	124.85	116.996	131.98	123.004	116.816	119.206	126.973	122.155	121.838	126.981	114.863	128.938	121.232	116.058
APOD	111.433	113.223	110.513	108.875	114.125	109.08	112.624	106.147	118.447	116.112	107.855	116.874	102.734	122.934	117.716	112.033	109.439	111.54	114.193	118.754	113.672	118.703	109.336	107.711	112.183	117.072	105.854	110.172	115.44	123.063	126.246	109.951	113.641	107.337	110.716	115.873	122.968	127.913	127.582	114.607	114.664	111.893	115.004	112.626	110.39	117.637	114.775	118.58	118.269
APOE	114.752	116.825	114.222	116.153	115.747	113.666	110.535	114.316	122.247	123.791	123.434	116.57	111.997	124.464	114.712	112.053	116.781	111.794	112.861	118.692	119.564	118.319	112.883	122.134	119.757	112.335	114.829	118.367	118.428	119.187	107.549	121.97	117.424	113.279	117.372	116.182	117.147	119.355	111.839	120.749	114.237	120.333	117.315	118.199	119.532	114.573	116.052	111.939	115.408
APOF	116.779	123.549	115.834	114.826	114.986	126.133	121.184	114.064	117.763	112.9	126.156	122.531	119.491	124.681	126.889	117.486	118.726	119.02	122.142	114.439	116.716	121.344	112.083	127.715	133.085	113.186	119.368	116.969	124.846	121.901	121.098	118.141	115.225	121.397	118.948	117.486	123.557	114.903	126.004	114.489	111.556	116.03	117.152	130.419	111.995	115.906	126.874	124.835	115.132
APOH	110.423	105.672	112.438	109.666	113.037	107.685	108.487	109.99	121.455	109.719	108.606	115.541	112.719	110.811	118.559	114.088	115.934	112.177	113.954	102.997	112.521	113.865	115.336	117.172	114.763	108.82	111.025	123.863	114.405	112.047	116.612	110.756	117.872	111.79	109.673	111.247	113.479	112.96	120.364	111.783	107.855	111.573	109.336	112.227	114.089	114.235	105.084	113.422	113.852
APOL1	121.258	121.143	123.512	123.491	125.431	131.646	121.255	128.134	118.841	117.056	120.007	114.186	119.783	124.665	119.955	124.935	123.113	125.842	120.073	129.497	117.364	123.955	117.534	122.347	129.442	121.358	125.204	122.367	124.646	124.94	126.401	122.643	136.131	121.656	118.672	125.033	122.262	118.042	119.946	124.584	118.078	126.329	121.122	125.592	117.76	123.286	122.228	126.136	120.718
APOL2	152.803	154.598	149.9	146.827	143.626	163.839	145.784	139.627	156.871	179.833	140.661	146.716	147.259	141.451	153.955	142.737	145.335	146.161	141.941	141.663	128.533	146.412	141.799	146.841	146.594	140.246	140.004	169.371	158.307	156.353	155.162	139.06	136.886	141.523	134.949	142.483	132.44	126.424	141.419	133.753	138.625	146.175	141.486	134.507	122.567	156.278	149.327	150.071	130.027
APOL3	132.134	141.367	146.595	134.379	122.944	136.784	135.3	133.973	136.605	127.983	136.954	123.758	127.328	137.673	146.839	129.706	119.171	142.007	141.005	136.523	133.963	129.319	131.827	122.883	130.053	142.672	131.072	141.964	134.161	131.241	138.407	134.722	122.616	134.175	132.644	133.372	123.441	118.381	123.722	124.552	136.061	148.866	128.708	134.448	160.421	124.563	131.327	133.667	143.151
APOL4	127.12	124.198	123.373	127.486	119.604	123.611	125.252	123.994	123.444	123.084	125.42	123.227	123.974	121.836	121.055	121.361	121.998	120.651	116.603	121.13	122.019	118.766	123.804	120.145	121.038	123.994	124.135	118.42	125.963	126.636	129.978	122.371	119.588	129.937	119.27	124.167	117.726	132.617	119.222	122.586	125.999	124.776	122.631	117.612	126.683	124.121	120.824	123.046	122.476
APOL5	114.028	114.365	118.38	116.552	111.315	120.231	121.378	122.086	117.557	119.201	113.534	122.719	113.195	114.037	126.063	116.827	114.06	117.496	111.383	118.103	121.372	116.737	124.798	120.011	115.3	114.673	115.068	124.927	123.747	117.562	116.439	136.632	117.472	118.448	116.183	111.899	123.576	117.108	122.519	117.292	112.014	120.317	116.347	119.384	141.835	109.843	121.418	120.287	117.891
APOL6	172.178	166.213	162.982	180.599	191.539	165.324	162.819	171.413	137.998	137.908	156.508	147.418	171.45	168.798	189.806	191.906	211.76	173.089	173.768	161.8	183.385	136.82	179.567	222.219	164.377	147.157	151.583	165.971	205.861	173.043	138.369	144.009	168.234	177.82	174.656	187.103	145.941	129.922	144.805	152.325	166.993	153.638	141.655	165.827	123.78	151.402	180.862	173.851	228.307
APOLD1	124.508	139.417	124.399	130.64	128.799	118.776	120.926	121.787	143.883	171.193	131.276	131.088	131.024	117.971	130.615	137.604	135.55	122.5	138.015	120.65	140.435	133.866	126.451	123.043	130.205	122.986	115.189	138.369	151.396	130.532	124.116	127.584	133.09	130.092	133.54	124.528	130.259	134.547	133.362	126.609	123.647	117.463	123.382	122.897	143.451	138.953	117.63	125.166	122.978
APOM	153.419	150.104	150.53	162.92	163.596	169.533	140.246	186.199	191.521	214.849	169.464	171.018	164.198	176.515	157.746	156.326	156.102	173.578	149.722	239.509	199.822	182.495	197.589	141.578	164.741	193.813	222.736	177.507	199.228	187.501	178.81	193.145	167.962	162.876	150.418	164.995	198.05	192.852	203.548	185.609	146.517	198.862	227.878	179.019	341.507	193.964	175.87	189.116	127.649
APOO	277.118	308.033	289.623	290.461	341.214	356.909	335.065	381.557	342.689	364.716	290.424	287.433	267.597	298.716	241.828	263.358	263.613	275.104	289.724	389.285	328.2	289.245	299.557	295.573	258.216	302.516	378.115	259.226	353.673	269.247	358.635	304.619	276.208	259.942	237.834	353.732	301.489	275.919	330.173	254.526	387.783	357.815	351.6	280.673	566.844	267.935	308.963	314.291	343.833
APOOL	151.847	157.152	144.156	148.565	174.292	136.263	149.165	195.218	190.252	187.487	143.061	168.536	153.539	148.25	168.302	149.612	145.645	176.129	160.784	171.378	139.368	155.131	149.568	187.293	151.484	165.045	179.86	183.07	210.575	180.468	190.809	157.792	161.594	162.21	173.791	162.24	215.815	167.908	179.284	156.177	168.7	181.339	167.132	144.59	554.599	150.842	189.039	148.817	184.913
APP	447.96	442.058	669.333	616.91	595.111	477.371	529.513	459.104	213.875	238.068	464.586	671.344	525.812	442.712	458.791	571.908	385.493	305.345	318.803	467.161	669.752	439.004	591.793	761.086	694.2	628.004	632.164	413.225	204.695	483.03	442.942	437.764	1209.81	464.497	615.908	502.606	787.179	565.396	629.092	948.685	786.604	592.596	768.619	431.886	196.096	440.212	446.909	428.394	499.118
APPBP2	633.398	626.534	623.571	599.497	528.781	457.28	562.208	488.25	568.757	679.027	551.487	410.49	510.616	494.795	459.336	537.943	540.962	453.925	483.11	229.137	425.168	437.252	464.088	447.68	439.258	414.215	408.23	424.944	405.01	407.41	486.147	421.17	351.649	457.826	640.434	408.269	393.606	314.942	372.551	367.914	349.55	303.495	298.788	416.477	804.396	575.254	420.84	520.341	452.396
APPL1	344.243	344.928	305.193	292.176	304.716	339.531	313.554	289.024	423.5	404.779	370.366	348.463	316.159	347.889	317.335	341.984	359.422	327.743	403.869	219.598	302.789	340.181	334.553	366.892	343.642	314.839	285.997	429.139	308.033	330.731	363.126	324.152	296.994	362.147	320.805	259.51	393.692	431.742	319.166	372.787	314.633	270.973	304.801	403.581	952.563	313.649	308.368	363.488	440.85
APPL2	585.302	606.021	563.791	594.975	479.087	437.853	570.421	438.704	821.293	820.854	700.365	652.623	608.739	613.997	621.509	639.45	564.643	519.456	538.467	652.175	514.316	534.693	527.179	527.813	563.243	414.826	367.857	658.452	497.607	492.216	770.91	613.997	563.01	580.041	676.556	529.954	481.063	435.486	465.305	513.112	451.001	349.587	277.662	618.795	556.201	591.062	456.571	457.303	504.82
APRIN	123.495	129.183	115.046	113.669	114.678	117.572	119.91	118.657	122.664	119.923	122.754	113.327	118.526	121.657	119.111	119.425	117.439	116.03	120.625	117.185	120.17	116.579	123.484	113.632	117.602	110.601	118.311	112.065	118.523	127.252	117.238	109.119	110.635	118.536	117.929	120.902	114.985	113.742	121.853	119.981	135.7	116.016	123.905	121.326	145.306	125.501	115.922	116.788	122.857
APRT	781.214	975.372	874.44	823.662	909.985	1054.12	765.177	998.012	592.62	434.124	1110.21	1109.13	1006.94	1086.38	1051.39	974.391	838.389	1134.95	924.319	1431.31	1388	1123.41	1174.76	910.342	959.634	1277.71	1162.98	854.832	938.214	1008.41	1049.92	1088.16	753.625	788.984	773.795	948.486	788.435	1350.18	1514.93	816.868	1000.86	1761.66	1622.27	824.528	160.452	1089.62	807.776	1215.75	652.813
APTX	409.218	421.453	370.433	419.219	403.667	381.636	415.413	381.487	463.781	528.49	406.058	381.799	362.995	362.502	386.839	368.823	408.123	350.151	355.002	278.342	357.364	325.138	334.071	350.727	296.397	357.134	402.632	414.674	533.293	376.901	451.252	356.44	324.785	395.548	369.877	344.192	385.976	407.202	350.622	299.767	432.728	351.161	384.16	384.428	565.107	420.503	352.334	413.291	442.786
AQP1	125.577	130.485	131.391	133.251	127.82	134.67	137.202	128.413	124.26	125.322	141.539	125.626	129.076	124.265	128.442	136.545	128.966	128.186	129.45	125.327	132.248	127.839	134.09	130.486	129.536	136.249	132.509	126.978	130.402	127.197	136.671	122.47	128.405	133.958	125.001	128.152	124.489	131.201	129.341	135.021	137.133	136.274	132.756	129.383	151.926	123.696	129.433	123.431	131.868
AQP10	255.009	364.98	597.026	391.025	481.719	164.063	346.101	173.246	218.889	577.235	337.483	294.458	152.454	279.938	161.913	182.069	253.985	317.814	291.441	201.571	210.109	300.71	139.821	182.681	207.619	443.898	292.466	178.147	136.089	388.005	211.713	139.696	646.115	205.19	340.87	286.401	300.053	580.547	585.784	681.274	684.261	657.266	1131.78	346.008	308.663	161.726	391.962	661.08	130.951
AQP11	139.848	149.308	138.036	133.258	149.655	125.92	166.96	127.224	146.778	153.567	131.923	124.849	121.677	129.998	136.14	148.149	135.369	132.071	133.939	120.153	129.198	129.686	128.871	130.213	132.1	121.897	127.422	129.696	139.839	129.084	132.535	131.31	131.422	123.629	136.61	133.798	133.331	123.026	116.615	127.59	121.62	118.266	125.701	124.033	235.896	123.404	129.21	130.561	116.702
AQP12A	124.713	122.8	131.034	131.123	133.577	134.295	130.515	131.742	127.13	148.068	122.642	128.577	128.894	130.845	144.476	145.329	125.442	138.374	132.541	138.411	139.137	137.877	136.101	152.333	128.225	145.191	151.896	139.385	134.066	141.801	136.275	137.109	130.427	129.108	142.786	133.807	134.538	133.101	133.359	138.386	149.666	128.864	228.51	128.591	146.768	128.583	175.167	136.75	127.582
AQP12B	201.826	242.128	187.308	181.847	201.762	222.192	151.541	193.162	216.552	230.779	199.193	181.123	186.367	191.735	181.291	212.622	187.861	173.167	191.571	149.584	276.079	258.662	269.647	251.235	294.034	240.462	215.162	169.224	168.023	392.938	211.511	194.467	158.18	178.81	178.88	192.635	219.903	226.167	282.392	203.59	174.261	238.801	235.418	195.373	118.932	170.462	262.712	464.497	139.25
AQP2	124.684	126.887	131.758	118.837	115.146	125.038	121.96	127.006	117.491	127.331	126.558	127.477	117.494	126.358	123.078	130.898	126.078	125.144	126.039	125.434	123.22	119.785	123.452	122.713	127.028	124.007	134.39	124.076	123.507	124.077	119.357	111.029	121.61	128	122.078	128.345	125.503	120.461	114.689	115.974	135.717	119.117	121.284	123.152	129.443	121.942	117.046	114.126	126.108
AQP3	200.278	261.092	281.51	185.389	182.249	203.227	195.094	268.717	167.396	165.018	159.72	166.563	152.934	152.232	155.043	174.884	191.953	150.205	149.291	346.627	162.965	205.95	170.559	197.273	183.299	191.571	272.654	172.522	251.464	155.744	180.191	162.689	163.756	184.424	165.827	167.307	209.422	164.092	218.559	144.324	175.155	283.604	166.275	168.926	116.096	185.547	190.979	223.623	288.456
AQP4	114.753	114.96	112.031	115.344	111.954	113.931	117.376	114.379	112.101	119.92	112.167	122.132	117.618	111.139	113.451	116.457	118.97	110.58	115.994	118.843	112.526	120.124	119.115	116.997	114.116	111.692	117.802	109.903	121.822	110.4	120.047	114.204	115.208	116.403	110.197	117.978	120.677	113.364	114.076	120.094	113.573	117.225	115.053	115.113	119.521	114.584	118.215	116.546	117.311
AQP5	112.048	109.986	111.208	107.03	112.724	113.177	110.306	113.344	116.631	113.826	109.309	126.075	110.635	111.771	115.981	113.584	107.758	112.773	115.329	117.815	112.433	110.11	105.693	125.577	111.543	107.245	112.17	121.391	118.203	114.5	113.806	103.325	113.892	116.626	122.369	109.897	111.733	120.733	113.942	120.821	110.756	114.393	113.134	116.446	119.913	105.995	109.917	114.577	122.295
AQP6	119.955	117.726	118.566	118.315	115.136	127.661	116.915	120.99	118.909	120.604	119.927	113.315	118.754	119.392	122.102	116.341	127.08	120.417	122.037	121.494	119.879	119.644	125.723	121.334	121.321	120.526	116.971	121.935	122.661	127.865	124.013	114.504	115.904	116.803	112.354	122.821	123.496	116.658	121.389	115.384	122.539	125.673	125.891	122.349	127.124	123.132	119.878	118.96	123.14
AQP7	118.303	110.464	113.382	115.552	124.094	116.187	112.606	119.48	105.415	123.664	123.787	124.851	120.374	120.874	116.46	117.279	117.351	114.161	111.173	115.49	126.716	132.491	120.338	120.809	131.099	124.116	122.901	120.358	120.677	126.579	127.426	129.583	118.436	114.131	117.936	138.223	118.425	109.662	119.936	118.582	114.2	112.686	120.439	122.637	130.785	122.008	132.344	126.45	121.591
AQP7P1	127.01	144.28	134.858	135.271	125.675	131.177	148.431	152.86	135.958	124.77	135.033	150.817	131.162	136.954	131.121	133.668	126.163	141.611	127.997	134.417	144.018	135.342	157.8	140.103	133.513	146.349	133.518	148.271	150.08	133.826	126.428	142.276	142.804	140.475	136.067	152.136	126.642	130.796	127.781	133.003	138.669	162.66	159.185	133.96	192.803	134.256	131.219	151.442	227.155
AQP7P2	125.657	118.689	117.053	121.374	118.296	120.928	123.638	125.925	121.79	123.377	120.901	120.956	125.279	125.679	125.681	134.204	123.564	123.483	115.078	124.937	130.008	127.221	117.919	116.273	118.165	123.73	124.822	121.233	120.561	127.157	123.088	119.083	120.372	117.308	126.156	129.035	132.072	125.051	126.13	130.158	122.524	126.534	119.206	119.863	116.666	123.874	124.537	124.894	138.749
AQP8	127	130.168	119.428	114.591	120.647	119.939	114.232	116.874	125.305	120.184	120.76	132.983	117.039	115.617	116.909	116.139	112.17	116.395	119.168	130.262	121.088	126.53	118.673	114.985	132.257	116.42	112.962	119.44	119.823	116.552	123.301	119.243	122.287	114.236	126.018	120.165	130.365	120.344	125.159	118.153	121.664	124.187	125.017	117.616	128.179	121.794	122.081	121.159	119.55
AQP9	1178.57	534.823	1140.7	1288.86	607.57	2758.67	987.911	1794.22	1109.4	628.306	864.306	2044.82	3621.44	1281.67	1194	1989.72	1681.63	1762.06	3022.93	1919.92	1084.47	2214.64	1356.68	2092.56	2230.31	2069.41	1682.35	7860.91	1586.04	2112.18	623.904	1297.1	1596.49	698.352	1380.28	1141.91	2825.97	1316.2	1476.57	5086.37	2988.12	1381.91	4640.75	2116.12	2447.34	2678.31	9385.35	1412.42	2181.48
AQR	385.964	379.925	379.322	371.992	308.164	335.536	422.157	342.773	461.549	419.086	367.383	360.75	392.984	401.173	404.701	392.795	390.134	406.826	372.899	630.155	376.694	390.155	371.936	425.46	419.213	322.75	297.134	415.152	482.606	338.159	359.088	373.21	431.1	388.819	439.823	348.953	375.695	348.652	388.329	379.375	392.975	285.077	272.645	375.346	441.581	413.449	324.901	359.995	369.475
AR	118.881	114.617	111.78	110.945	116.328	112.468	115.126	111.031	113.182	115.013	122.415	121.644	121.704	121.523	115.709	117.793	117.019	123.642	113.735	119.626	114.624	116.726	117.661	114.78	114.768	112.936	118.338	114.287	115.948	117.825	117.223	114.474	113.141	114.142	115.627	113.025	114.3	118.093	113.845	115.953	111.866	116.908	114.591	116.026	113.723	112.571	124.499	118.351	121.628
ARAF	1252.08	1296.5	1407.77	1181.61	1310.58	1132.58	1152.79	1216.44	556.817	567.366	882.701	974.747	820.64	1004.99	1006.24	1069.83	1208.04	1262.43	1120.23	940.465	1070.87	984.816	1015.26	1193.57	1113.47	1228.95	1409.42	624.92	706.308	1235.65	1339.74	1148.86	920.23	1458.84	983.794	1156.71	910.493	945.201	1032.39	883.315	1348.88	1695.69	1566.14	1041.21	1027.59	942.027	1359.07	1273.7	970.17
ARAP1	428.677	468.675	408.968	498.397	329.214	531.746	404.097	431.567	619.846	378.637	570.672	644.239	624.212	435.072	553.48	494.354	462.892	790.255	454.394	740.896	417.444	670.986	441.378	598.95	584.013	555.214	472.043	850.938	774.526	491.912	558.251	601.097	686.644	430.97	645.225	498.811	510.269	791.133	473.652	471.293	693.519	658.007	880.452	776.94	119.397	700.914	652.175	424.795	551.051
ARAP2	306.829	282.005	220.221	279.708	251.735	215.893	279.96	239.822	417.942	422.948	230.242	216.016	286.978	280.434	303.025	386.794	435.525	257.597	367.502	238.678	235.162	316.22	298.987	326.134	306.144	209.188	190.224	299.046	285.136	214.801	231.928	239.726	292.359	285.111	309.22	266.615	295.66	275.648	253.485	288.92	180.729	169.008	142.954	210.694	183.523	268.735	196.801	176.291	432.849
ARAP3	399.405	389.769	482.106	473.12	331.102	587.145	453.17	380.588	375.279	403.881	414.45	554.028	810.455	398.701	494.296	517.95	408.232	504.727	550.628	330.212	308.125	444.177	358.904	371.463	317.851	590.081	461.153	843.837	393.453	500.251	408.181	413.762	500.757	425.603	469.002	383.343	387.371	504.146	362.609	520.425	724.116	583.325	737.868	531.8	496.431	439.888	661.422	440.84	368.746
ARC	121.367	125.271	115.352	119.233	112.841	119.89	117.451	115.811	117.882	119.531	114.777	129.635	127.055	117.529	130.879	119.388	118.847	108.248	118.403	116.836	120.328	144.575	119.266	130.74	117.871	117.705	119.085	118.821	118.236	129.464	121.499	126.049	115.826	118.148	111.264	119.074	122.11	127.049	125.128	115.819	115.229	117.894	116.535	126.869	118.238	131.284	121.215	127.192	118.948
ARCN1	1877.9	1942.48	1659.27	1890.61	1512.82	1634.38	1915.36	1834.99	2307.68	2490.32	1975.07	2237.75	1968.47	1942.48	1934.64	1894.7	2076.44	1891.59	2053.66	2288.6	1537.91	1697.13	1422.27	1610.74	1339.74	1608.49	1543.23	2471.23	3242.86	1623.84	1990.74	1637.6	1455.75	1611.99	2100.59	1966.62	1421.62	1365.45	1564.52	1366.69	1706.73	1353.98	1427.92	2066.9	503.685	1916.52	1565.29	1801.21	2473.07
ARD1A	522.572	541.25	506.409	446.677	533.49	589.695	544.873	650.615	376.382	412.65	528.124	494.947	535.79	482.556	520.557	491.077	434.376	578.94	509.263	722.537	756.237	670.483	648.001	652.329	688.541	653.706	751.035	412.844	519.766	657.574	676.864	681.763	432.279	505.309	438.436	570.113	644.091	689.711	856.975	561.374	619.387	800.26	866.802	418.245	946.082	564.643	594.727	605.438	387.464
ARD1B	120.923	118.806	122.13	121.281	113.01	121.303	120.14	114.921	122.414	127.235	117.192	122.426	129.12	118.579	113.909	118.543	123.806	121.437	114.521	114.006	122.76	121.777	119.748	118.89	122.477	114.215	110.736	128.992	122.497	118.424	122.096	125.35	137.191	122.45	117.318	123.704	116.701	110.986	126.966	121.515	121.171	124.089	114.054	128.101	117.686	124.413	115.423	116.379	118.982
AREG	114.88	111.345	110.36	114.47	110.45	107.549	107.987	114.927	113.458	105.609	110.067	112.987	117.741	112.011	114.66	106.742	119.501	124.831	117.348	113.855	116.431	125.304	108.773	114.532	112.106	122.143	115.935	125.179	111.95	117.262	120.368	107.608	112.154	125.712	117.524	112.033	117.299	116.76	116.83	103.808	109.945	111.552	115.281	121.637	119.889	112.865	114.977	116.824	122.889
AREGB	115.495	115.157	128.271	115.763	119.863	112.96	112.289	111.231	111.969	113.618	114.879	115.452	115.404	119.603	128.041	103.114	114.366	111.641	117.501	113.816	124.032	111.995	120.684	116.632	113.597	115.267	115.077	118.489	113.968	104.748	115.979	111.862	108.343	116.046	119.475	114.832	120.002	116.904	112.781	121.982	114.283	115.47	119.891	124.079	111.038	112.394	115.555	116.062	121.538
ARF1	390.811	483.72	478.56	457.389	431.664	486.815	476.144	478.919	354.579	307.17	490.417	451.175	446.843	522.325	485.428	462.81	418.916	521.899	406.219	921.708	478.815	512.14	530.458	579.821	441.901	581.382	561.48	428.768	483.287	564.643	424.966	484.179	560.246	400.084	376.971	568.529	487.115	520.94	623.506	635.204	504.177	679.308	799.581	556.006	125.901	468.51	493.247	404.998	449.052
ARF3	550.577	663.23	693.137	603.331	563.155	683.158	645.225	556.926	302.18	421.453	535.79	659.996	643.083	586.597	650.227	685.954	491.53	773.158	580.041	558.251	637.483	608.739	689.711	605.614	589.908	760.335	702.403	650.337	503.17	713.623	640.454	870.922	975.941	555.881	550.725	661.834	619.501	739.227	767.907	751.219	767.315	1085.17	1023.26	1048.19	173.592	536.8	485.428	719.716	606.164
ARF4	1191.26	1096.15	1443.34	1434.85	1332.72	1222.17	1227.78	1744.55	1450.49	1283.04	1250.87	1288.4	1454.77	1386.4	1312.48	1179.57	1343.75	1240.99	1343.44	1746.97	1222.35	1214.87	1413.47	1466.5	1280.67	1416.1	1777.32	1392.82	1645.45	1412	1050.99	1166.07	2126.5	1430.02	1316.31	1590.33	1620.8	1468.68	1467.68	1638.65	1870.06	1458.68	1932.19	1803.91	1333.8	1386.06	1563.11	1320.05	1752.4
ARF5	899.215	1195.66	929.626	1128.18	1107.25	1320.8	1073.29	1255.21	793.061	624.92	1206.81	1697.13	1232.63	1175.4	1100.5	1106.53	971.948	1309.07	973.428	1367.19	1334.26	1141.13	1366.12	1079.07	1033.45	1517.45	1322.8	1203.63	1033.45	1242.62	905.633	1083.44	1079.07	749.535	919.521	1091.92	1183.55	1656.94	1299.35	1112.65	1654.37	1689.48	2342.71	1050.94	134.668	1317.72	1006.8	1243.89	888.911
ARF6	139.631	161.237	147.185	126.056	157.098	138.386	143.913	141.533	140.359	138.541	128.531	140.704	139.862	141.701	133.557	133.083	127.941	152.339	141.501	128.542	142.301	140.625	135.3	144.637	131.246	132.25	136.805	139.257	133.63	142.96	143.776	152.141	153.303	150.944	137.748	143.031	133.37	163.714	130.258	163.034	147.741	134.399	151.352	140.641	261.118	152.29	150.857	131.925	160.361
ARFGAP1	217.045	285.621	240.764	264.386	217.2	251.841	252.823	252.02	193.765	225.241	321.968	318.315	293.946	261.772	296.689	249.189	253.431	331.684	283.409	504.584	295.51	349.497	253.35	270.313	285.372	244.579	266.734	309.968	284.426	286.701	315.939	350.267	273.51	237.571	237.376	279.451	214.824	243.038	274.232	225.426	237.217	330.342	358.739	253.214	125.664	332.252	272.886	278.484	237.026
ARFGAP2	617.72	693.658	821.293	672.565	589.695	742.862	631.635	621.509	357.249	347.599	392.036	393.013	401.433	462.981	416.776	418.559	422.593	465.115	425.495	597.303	487.866	457.303	464.942	468.767	458.957	818	866.271	338.372	430.539	450.82	396.553	489.404	373.774	463.549	354.084	465.733	333.606	368.304	499.405	343.896	663.721	734.342	935.364	362.502	967.777	437.389	578.826	475.579	368.161
ARFGAP3	570.79	535.081	619.866	604.023	497.112	454.4	609.426	637.159	778.609	616.246	452.141	487.942	543.939	549.091	611.206	522.711	546.58	515.032	460.8	1174	501.927	590.344	485.326	614.457	579.12	482.451	476.087	602.163	1046.22	460.552	506.326	371.217	592.242	531.174	532.558	563.357	538.777	294.56	440.342	458.399	350.301	408.59	509.85	570.583	190.433	514.822	531.788	380.018	695.152
ARFGEF1	638.969	659.877	642.76	549.261	478.329	443.853	570.632	454.957	724.754	785.4	610.605	674.362	627.367	616.58	635.776	647.44	628.17	632.796	695.827	537.196	469.985	634.492	608.162	695.907	645.699	471.707	384.358	947.894	738.463	639.632	659.324	674.228	777.35	662.386	978.15	593.481	664.272	476.112	456.295	665.769	601.177	368.086	320.947	864.174	671.011	707.421	588.023	587.938	696.969
ARFGEF2	166.619	156.756	157.746	161.393	160.233	153.504	157.889	185.712	208.316	201.826	186.102	176.67	173.72	171.234	179.345	178.147	169.44	186.883	199.75	212.599	165.72	199.84	176.254	173.806	172.154	169.272	173.806	183.964	216.485	206.118	197.119	170.846	189.69	207.931	173.151	194.582	199.933	179.157	166.129	204.936	162.491	168.785	142.843	185.144	383.632	193.03	193.56	172.056	181.697
ARFIP1	131.485	132.207	151.061	137.42	147.804	154.063	149.584	139.214	130.922	134.986	130.644	139.933	148.361	156.416	128.967	133.042	132.302	157.299	129.661	127.044	131.065	139.231	133.596	137.914	134.766	140.793	142.12	125.377	124.546	132.017	130.036	131.187	132.285	138.165	132.881	136.903	138.685	137.97	140.399	139.556	132.358	145.009	139.944	126.798	169.787	139.097	145.212	125.231	176.342
ARFIP2	145.531	140.875	135.043	139.306	145.058	142.476	146.07	147.362	139.334	128.667	129.3	127.983	126.012	130.988	128.596	126.715	143.815	142.658	125.998	126.394	133.346	143.569	136.238	129.502	141.064	162.679	138.086	130.532	142.686	138.165	127.219	125.635	141.208	135.46	136.514	124.151	136.497	120.687	138.263	126.302	152.123	141.264	140.414	132.117	177.867	146.047	142.368	142.882	135.847
ARFRP1	134.62	130.479	130.745	136.685	129.214	138.209	135.872	143.031	143.399	128.285	128.784	140.344	135.211	139.437	135.966	130.786	130.45	147.926	133.006	151.076	132.728	131.976	143.677	126.881	132.671	131.258	141.192	137.532	139.514	138.441	148.888	140.537	135.488	131.685	133.022	135.892	125.383	151.018	126.972	132.665	123.495	133.56	140.384	133.2	110.309	131.819	128.6	148.068	127.607
ARG1	133.75	138.901	180.496	139.129	125.436	131.513	127.257	122.619	141.623	127.936	170.526	1255.21	161.491	183.657	137.704	130.259	125.439	137.547	268.956	125.004	115.464	168.599	167.511	124.498	139.821	450.162	139.487	729.287	195.373	629.813	1050.6	126.838	172.905	158.433	182.623	196.51	238.942	316.656	380.76	1169.91	1829.15	354.714	213.762	941.426	1038.9	183.13	806.559	185.067	156.841
ARG2	145.541	176.67	160.598	162.506	152.379	145.541	164.525	154.581	161.791	217.583	143.347	152.08	145.881	139.772	160.226	129.503	146.793	165.676	147.685	150.488	166.66	178.529	167.396	156.078	145.664	155.873	160.516	149.063	153.362	147.536	137.588	146.462	217.222	132.056	157.352	142.726	159.101	223.023	167.089	195.056	176.919	194.097	199.193	158.257	301.44	131.029	188.892	184.157	124.793
ARG99	129.787	111.15	120.3	119.571	117.988	120.258	119.681	118.813	118.566	122.45	123.365	116.339	120.459	126.275	123.52	120.324	112.93	125.611	121.477	118.118	127.225	117.088	119.1	114.322	120.058	121.245	139.231	121.089	121.386	117.701	118.135	128.127	123.341	127.956	123.251	118.77	117.688	112.24	140.278	125.658	126.753	131.655	121.494	126.24	117.614	112.907	131.742	119.335	128.118
ARGFX	110.298	115.249	112.711	115.832	114.408	110.216	114.275	121.69	116.035	125.004	119.888	115.011	108.967	115.588	111.012	116.431	111.99	108.448	117.236	111.348	121.423	108.137	126.544	116.642	111.458	119.344	116.92	137.743	117.958	120.556	114.963	118.456	118.664	116.291	105.443	110	114.076	119.703	117.287	118.743	110.315	119.571	111.365	116.285	111.775	115.167	116.958	113.101	116.706
ARGFXP2	116.112	115.244	119.572	118.541	118.039	121.218	119.354	121.708	120.753	117.988	125.259	116.716	121.177	118.082	116.79	121.891	115.667	123.517	118.615	123.288	118.954	116.75	113.708	115.78	119.492	123.534	119.977	123.494	122.135	118.487	125.837	113.778	121.772	111.975	115.801	120.617	119.925	116.326	121.637	127.331	121.039	119.932	121.182	118.889	121.039	119.185	119.495	118.727	119.511
ARGLU1	5256.25	3918.97	4366.56	4836.57	4062.42	3278.66	4581.46	3684.64	6397.12	6529.74	5315.88	4856.75	5325.64	5050.9	5567.62	5308.84	4917.68	4481.04	4671.82	2068.06	4208.53	5037.95	4497.21	4107.65	4707.21	2952.9	2978.39	5168.71	4360.65	4312.08	6285.77	4560.47	4232.73	5334.14	6864.99	5050.9	5086.37	4497.21	3899.8	4610.11	2364.44	1929.64	1531.31	5446	11597.6	5832.97	4081.6	4158.22	4298.26
ARHGAP1	919.204	1082.29	1208.04	1022.56	996.537	1175.92	1054.45	1155.7	932.356	754.55	1721.12	1435.85	1504.99	1540.04	1688.49	1564.52	1405.53	1697.94	1355.54	1261.9	1615.97	1442.64	1461.45	1495.72	1391.21	1317.72	1360.71	1323.73	1192.18	1465.78	1189.44	1680.95	1127.41	1404.3	1193.57	1435.31	1149.28	1446.95	1451.35	1256.7	1629.24	1758.26	1789.25	1151.51	409.97	1406.49	1216.97	1360.21	1134.16
ARHGAP10	250.464	345.964	215.381	243.32	234.757	218.167	252.086	247.236	277.662	279.346	224.192	187.742	216.983	244.12	203.063	221.285	199.347	254.968	188.302	279.807	244.026	237.565	259.474	239.395	171.884	202.688	186.298	205.881	220.625	228.237	208.942	205.732	182.233	203.548	171.836	197.462	195.024	229.656	240.999	164.198	234.88	236.313	196.022	170.865	262.415	213.016	180.655	218.633	133.532
ARHGAP11A	129.159	115.332	123.753	123.053	124.669	121.79	123.856	122.652	135.992	140.484	117.548	128.596	122.429	125.487	119.355	130.381	126.907	119.106	124.792	127.278	123.943	124.736	122.861	118.586	128.726	120.135	123.084	115.961	135.293	139.741	129.464	114.968	134.161	133.887	128.044	123.704	121.552	121.561	124.686	123.631	125.057	120.86	122.14	123.73	147.932	131.245	129.129	134.278	127.17
ARHGAP11B	135.201	136.214	140.222	150.799	161.1	136.939	145.961	154.473	134.889	126.633	148.744	164.82	145.234	155.462	150.143	151.231	151.992	151.424	148.028	205.011	141.27	132.684	157.317	143.395	136.584	131.089	139.42	133.814	143.038	181.921	159.123	171.773	157.881	220.245	155.815	171.481	145.343	119.501	136.725	154.254	137.72	129.721	127.75	140.775	123.251	146.73	158.936	145.541	146.751
ARHGAP12	318.145	286.464	247.108	263.469	254.534	228.706	297.223	237.639	471.893	462.215	256.575	281.091	302.655	273.034	293.967	306.603	341.458	246.196	325.061	274.122	261.801	318.156	311.642	275.956	350.996	210.019	206.457	443.101	316.988	215.483	275.579	236.842	304.074	291.088	391.988	296.514	412.762	290.592	271.995	331.983	191.703	171.439	165.241	319.726	284.911	343.257	215.285	238.353	284.663
ARHGAP15	4272.03	4228.54	4133.99	3796.46	3899.8	2914.09	3976.41	3178.55	4458.8	5462.31	3320.06	3736.9	3300.57	3520.38	3207.74	2988.12	3854.36	2997.4	3684.64	2343.94	2631.45	2901.35	3356.07	2756.37	2224.46	2873.02	2550.47	3038.43	2722.32	2580.57	3875.47	2621.3	2596.18	3288.61	4178.61	3630.05	4099.25	3281.39	3578.23	2649.71	2644.17	2592.94	1670.27	3406.65	5981.54	3125.3	3086.62	2984.03	3205.3
ARHGAP17	265.448	263.788	252.576	262.923	254.323	281.113	279.973	234.794	343.943	412.132	306.007	278.342	284.705	288.635	377.632	305.832	323.23	354.255	350.197	264.635	258.024	284.584	245.29	275.519	255.157	296.944	309.219	356.909	512.14	314.548	325.739	398.574	337.827	288.21	297.743	348.11	273.535	313.153	265.688	281.643	299.965	288.971	310.596	339.992	146.611	362.935	311.553	321.966	336.047
ARHGAP18	150.32	159.753	131.315	151.025	164.253	126.848	138.052	148.888	261.706	321.527	200.468	199.151	175.882	186.971	178.435	179.049	192.24	193.283	197.813	142.999	151.082	195.483	187.808	177.712	180.349	130.043	133.881	299.192	225.956	192.005	178.592	164.167	341.275	182.186	237.478	197.217	271.788	349.866	163.194	287.236	141.177	123.973	145.338	258.688	586.478	185.561	195.983	193.335	172.801
ARHGAP19	531.881	582.635	576.965	558.141	560.603	558.856	586.236	583.786	848.191	761.528	565.744	750.683	660.299	591.211	652.907	725.241	630.256	609.637	640.954	633.186	568.529	701.753	697.314	582.888	702.403	640.62	565.744	736.211	666.029	750.119	707.476	766.549	714.733	745.431	678.188	621.374	754.732	655.279	611.465	766.02	598.19	484.999	580.547	862.224	234.042	777.341	618.239	687.106	567.725
ARHGAP20	121.714	131.357	133.377	129.593	124.404	127.8	124.136	125.218	126.545	127.883	140.063	118.663	129.015	123.479	119.696	126.573	118.824	124.508	116.484	129.457	125.694	123.652	139.44	122.991	125.257	124.972	125.008	144.674	129.926	126.296	120.769	116.319	117.522	131.365	132.595	129.298	109.993	132.52	113.535	123.585	121.321	132.644	142.672	122.081	118.835	127.371	124.744	116.944	120.806
ARHGAP21	1015.26	1355.01	1271.77	1341.43	800.7	609.898	953.605	569.47	1394.76	2813.62	1367.19	1414.97	1210.27	1190.77	1162.94	909.14	1090.02	1327.77	1337.32	570.778	944.681	997.246	939.918	1184.66	823.577	688.237	737.349	1058.72	884.226	1050.6	751.814	724.537	1391.21	831.172	1224.1	864.033	1097.42	1202.04	1148.86	1671.15	891.871	792.11	643.65	1260.11	2270.12	752.234	746.673	837.885	752.234
ARHGAP22	155.423	147.9	154.172	164.741	160.15	155.567	145.572	163.695	151.466	149.028	155.399	180.988	159.166	156.996	203.016	158.237	141.441	181.984	164.699	143.169	135.369	127.913	134.868	145.166	158.643	199.103	159.46	168.565	175.602	180.484	186.487	167.994	155.011	147.057	171.957	137.574	156.656	166.275	133.979	126.514	186.504	167.75	187.018	145.641	322.776	151.307	141.276	177.638	156.663
ARHGAP23	127.78	114.523	123.621	118.383	128.644	121.57	125.536	120.607	119.959	114.637	118.197	116.824	122.508	120.886	125.126	118.333	116.205	120.22	131.627	124.301	118.251	124.973	117.65	119.375	121.968	119.335	113.822	120.489	115.553	124.024	117.634	128.935	119.659	122.007	122.76	122.399	115.956	122.93	113.064	126.831	129.453	128.087	125.133	121.343	123.021	125.159	116.962	125.037	128.269
ARHGAP24	180.235	157.55	178.025	199.17	169.966	208.064	191.246	185.349	214.33	169.438	193.987	233.079	199.456	181.832	200.696	215.812	193.219	175.599	251.343	154.062	187.056	202.198	187.641	194.729	217.808	257.572	265.94	281.693	217.684	277.249	201.163	203.808	240.751	188.099	204.024	194.288	211.419	257.275	205.076	307.354	302.04	175.889	247.407	250.595	164.573	206.334	248.044	214.658	173.31
ARHGAP25	148.409	141.666	140.683	148.736	153.29	146.363	142.056	151.307	156.841	152.928	154.64	142.832	154.311	147.148	163.665	165.702	167.439	159.101	162.355	150.042	170.652	150.325	140.363	153.96	172.44	144.104	145.32	125.604	129.501	169.453	150.342	163.936	166.475	179.833	165.195	165.711	168.989	193.482	170.785	143.798	135.712	142.679	151.564	147.362	136.162	141.317	159.321	164.933	171.246
ARHGAP26	178.461	204.494	168.234	172.893	186.153	199.423	168.471	189.736	132.14	125.283	170.44	163.782	166.451	156.781	172.937	152.679	170.538	212.045	177.882	177.359	190.752	217.483	174.656	168.459	161.662	167.69	155.263	126.32	127.236	193.196	141.721	213.361	176.941	147.101	160.016	137.841	157.755	161.518	134.995	168.941	197.289	178.284	214.257	178.284	121.159	158.621	165.393	165.522	143.468
ARHGAP27	333.656	315.278	337.483	335.987	294.861	378.695	311.888	341.634	310.116	221.032	391.316	465.733	561.48	387.167	502.125	397.853	380.76	521.804	403.737	460.91	433.096	507.098	354.433	372.98	339.117	362.756	374.858	615.45	477.259	467.08	481.245	572.896	430.399	342.046	375.726	393.411	340.406	349.216	347.383	356.015	314.499	423.429	579.42	514.709	113.3	466.114	551.403	374.74	508.46
ARHGAP28	111.014	115.606	116.955	115.86	115.009	119.317	115.396	119.331	117.116	117.582	113.516	118.563	120.837	120.472	121.113	117.176	119.79	118.462	117.904	119.056	114.234	118.983	118.705	118.227	114.833	118.552	115.424	120.135	118.667	120.452	122.469	117.945	115.03	120.45	116.467	118.414	118.284	121.327	117.716	117.131	115.24	114.597	121.096	117.46	120.334	118.154	114.814	119.138	119.924
ARHGAP29	108.922	112.125	109.948	112.995	116.643	114.838	119.61	110.859	115.674	122.335	105.054	116.683	115.031	109.59	107.685	126.489	112.474	114.838	116.077	116.595	105.52	118.406	132.09	113.607	114.092	109.555	113.884	116.991	117.724	113.14	109.789	110.113	110.617	113.753	120.046	111.112	123.308	118.353	120.429	111.186	112.477	114.186	111.155	113.53	119.048	114.942	115.65	115.429	109.555
ARHGAP30	1861	2055	1704.99	1991.91	1993.97	2149.74	1898.86	1807.57	445.929	567.507	1730.82	1706.73	1986.75	2114.78	2322.77	2097.65	2080.34	2688.53	2413.62	2004.22	1932.25	2039.87	2118.49	1558.06	1372.92	1839.58	1781.88	1307.7	1054.45	2296.27	2086.72	2724.17	1647.47	1564.52	1731.65	2185.4	1605.44	1424.59	1532.07	1547.39	1659.27	1988.43	1892.57	1658.49	144.899	1554.59	1907.69	1783.9	1838.52
ARHGAP4	2124.15	2109.72	2710.11	2170.53	1856.61	1776.4	2073.64	1747.07	698.51	679.614	2486.79	2601.63	2166.42	2028.65	2502.99	1713.32	1839.58	2080.34	1610.74	2166.42	2316.39	2654.19	2192.53	2242.47	2205.96	2056.07	1956.31	1462.1	979.275	1990.74	2520.16	2410.7	1968.47	2376.12	2737.18	2981.57	1933.49	2443.6	2119.81	1756.21	2170.53	2805.1	1941.45	1841.88	402.498	2037.06	1848.62	1797.11	1520.23
ARHGAP5	145.418	135.281	168.284	139.137	135.958	149.59	141.944	142.91	157.873	168.773	150.055	248.692	138.239	142.458	142.451	140.716	135.41	141.53	154.581	135.598	136.14	138.008	155.799	138.709	148.968	201.322	153.123	228.937	146.307	212.304	206.256	141.397	161.854	138.32	157.345	160.431	149.811	150.952	163.294	167.524	450.42	227.402	202.492	242.84	272.491	137.755	178.784	138.666	178.187
ARHGAP6	119.451	125.184	123.776	124.353	121.8	125.872	123.123	124.094	120.887	124.619	122.715	122.391	125.721	122.458	119.806	125.876	123.305	122.865	121.068	124.546	122.16	115.493	120.753	122.218	122.68	122.908	121.093	124.725	122.053	120.065	120.647	120.557	126.181	123.315	120.01	123.903	119.969	125.687	118.367	120.969	123.855	121.578	120.952	123.903	120.066	116.797	123.024	119.878	116.055
ARHGAP8	114.539	118.329	117.386	116.622	118.743	117.151	116.26	129.145	125.121	122.624	117.313	115.08	110.845	117.486	122.465	122.905	115.97	118.928	117.232	124.171	117.872	112.487	116.6	117.734	118.527	113.426	121.278	117.576	117.314	117.351	120.791	122.093	115.582	115.427	113.322	118.615	130.775	115.63	115.864	113.942	114.483	117.86	117.886	122.769	160.1	116.888	117.01	118.882	118.507
ARHGAP9	1805.18	1816.3	2019.34	2125.79	2002.94	2025.19	1569.71	1711.58	1914.41	2022.75	2829.77	2929.96	3198.67	2424.53	2624.93	2878.43	3072.62	2402.26	2442.78	2067.85	2467.64	2412.28	2105.62	2208.6	2217.1	1923.08	1886.12	3587.71	2164.25	2234.7	2661.75	2054.78	2420.57	2163.13	2502.38	2213.39	1921.76	2469.85	1697.65	2404.54	2276.31	2063.45	1749.61	2521.06	3041.89	2436.52	2243.49	1692.71	1878.84
ARHGDIA	876.483	934.172	875.152	915.707	948.685	893.896	835.391	1034.91	1080.81	890.9	2007.32	2008.41	1768.52	1726.87	1967.57	1190.32	1173.78	1982.2	1427.32	3320.06	2073.64	1916.52	1877.9	1779.88	1622.16	1309.07	1405.99	1782.92	1790.12	1705.83	1808.5	2186.85	1353.98	1424.03	1084.13	2022.17	1343.94	2137.37	2186.85	1919.92	1556.87	1869.19	1991.91	1433.26	623.202	2062.19	1506.35	1586.04	1076.17
ARHGDIB	19956	19364.3	20191.2	20792.5	18920.7	19419.6	18771	19364.3	19784.9	18336.3	17509.9	19121.4	17906.9	18388.2	17596.2	18610.1	18238.3	16772	18388.2	17261.8	16280.6	17768	17469.3	18673.5	15621.1	19215.5	20792.5	19736.2	17027	20911.8	18673.5	17027	18388.2	17313.2	20747.6	17906.9	20837.8	18771	16821.2	19589.4	21406.9	18288.3	21953.8	21953.8	24388.1	17414.3	21507.3	17946.7	17858.2
ARHGDIG	123.259	127.998	131.413	126.186	126.398	127.162	126.208	123.804	126.251	125.189	117.953	119.994	120.154	125.79	119.593	126.198	124.254	132.053	121.308	126.436	123.228	117.265	123.488	133.745	132.431	124.757	128.392	117.204	126.809	124.181	123.239	119.977	122.549	124.713	120.151	124.459	133.421	136.224	123.546	123.759	125.421	125.525	142.871	125.676	127.426	120.971	128.825	119.187	118.85
ARHGEF1	496.791	604.592	520.557	577.513	518.169	600.377	578.375	550.104	171.099	167.855	913.542	1125.62	862.454	833.513	932.981	816.884	765.432	801.81	604.341	943.454	790.255	800.7	649.285	610.038	649.576	567.259	570.897	620.393	232.184	797.422	1078.34	949.258	764.639	685.207	781.76	782.636	551.169	610.505	745.249	671.344	542.233	719.716	680.218	777.904	154.422	885.833	598.697	668.604	547.184
ARHGEF10	856.04	1016.21	180.12	157.324	146.871	157.09	161.624	649.086	218.201	1414.31	156.516	180.271	152.162	160.856	159.937	149.104	192.333	628.598	594.347	139.642	169.576	165.172	137.679	253.587	199.728	130.483	137.622	172.762	504.071	167.973	175.282	136.441	145.678	150.829	723.23	151.583	836.151	165.423	149.152	175.615	159.737	623.767	235.145	164.888	459.368	592.137	148.888	708.966	137.244
ARHGEF10L	144.678	138.337	161.351	142.712	142.832	144.361	144.052	128.791	157.194	139.986	145.778	137.347	143.463	146.643	157.042	164.78	149.76	172.937	153.932	138.093	137.395	159.443	144.541	148.108	156.931	181.291	161.294	165.033	164.591	149.238	125.503	156.671	165.033	160.09	147.091	141.823	143.074	146.165	148.888	128.677	132.93	160.459	194.487	169.727	160.361	142.941	143.33	137.574	167.983
ARHGEF11	138.699	146.939	145.502	161.662	151.648	166.97	154.998	150.354	147.789	133.846	187.412	231.942	195.606	162.078	181.831	178.88	171.798	191.735	181.001	180.12	157.212	215.238	182.727	183.299	145.225	168.599	180.484	245.801	191.196	191.502	186.435	224.599	197.704	165.785	184.379	191.555	166.948	177.195	186.435	167.908	203.429	161.923	227.374	192.463	124.935	216.206	211.29	189.479	165.549
ARHGEF12	174.568	197.38	185.345	191.025	170.449	136.374	176.841	138.833	205.301	259.442	173.592	170.505	148.849	151.957	163.839	147.521	157.643	178.644	191.452	136.118	146.849	160.161	159.369	165.084	142.619	134.597	172.238	154.959	159.377	148.195	140.784	136.784	161.8	149.534	159.89	134.483	165.622	291.262	151.41	193.679	274.128	142.352	134.089	159.115	423.735	136.32	139.718	162.848	133.64
ARHGEF15	108.825	113.933	116.403	110.058	112.91	114.061	117.269	117.649	124.258	111.68	108.568	121.601	117.238	117.061	118.075	119.909	110.796	114.597	116.884	117.214	116.598	106.642	124.611	109.249	108.633	111.631	112.949	112.149	121.796	114.953	113.392	114.161	117.356	113.889	123.924	114.782	114.282	109.615	112.469	119.459	114.71	117.161	116.098	123.249	108.866	109.785	111.514	117.615	118.252
ARHGEF16	119.857	126.109	119.325	115.978	111.562	115.381	114.888	120.578	117.881	108.361	118.595	109.132	111.948	115.932	120.485	126.651	121.789	120.8	116.088	122.901	111.737	121.218	116.643	113.845	114.87	116.642	119.255	114.366	120.336	108.361	117.83	114.024	117.487	114.701	109.866	115.415	117.403	119.404	116.066	107.82	116.899	129.076	114.391	117.717	111.686	128.075	119.244	122.001	143.906
ARHGEF17	124.568	121.96	120.825	123.495	128.9	118.374	121.54	123.87	132.588	127.703	130.361	131.896	118.884	127.198	126.031	116.364	115.858	125.17	126.543	126.479	122.636	121.983	129.597	122.076	125.37	125.041	120.813	122.484	136.14	132.206	123.022	131.092	115.47	124.486	116.232	125.026	134.851	126.381	135.861	121.87	133.848	128.058	119.235	120.008	128.177	124.573	130.309	123.214	117.724
ARHGEF18	5016.25	6050.9	5543.02	4208.53	4174.12	3909.89	4598.23	4458.8	2777.06	3349.02	4475.21	3581.7	3362.54	3867.34	3536.79	3688.93	3995.07	3626.01	3345.77	2445.45	3655.73	3875.47	3823.24	3278.66	4659.74	4329.13	4565.2	2868.29	2988.12	3732.84	4570.55	3713.92	2607.69	3610.8	3954.1	4198.24	2590.98	2845.36	3863.77	2997.4	3470.14	4497.21	3265.85	2795.6	9031.07	4133.99	3867.34	4822.81	3203
ARHGEF19	247.016	266.288	236.031	244.928	265.187	256.935	292.972	269.321	181.388	199.405	208.962	205.95	178.769	205.234	207.806	176.022	215.141	242.207	195.006	249.78	236.686	219.275	212.996	205.689	214.357	253.958	275.027	151.766	198.355	246.981	199.06	199.786	162.455	179.593	200.374	182.217	174.221	222.454	204.494	183.225	214.338	278.858	230.813	161.083	191.705	215.551	195.024	234.371	145.817
ARHGEF2	2880.88	3420.84	3294.48	3239.21	2499.19	3303.25	2854.15	2968.03	2422.09	4509.33	3879.54	3958.21	3420.84	3448.45	3883.08	3540.06	3389.94	3655.73	3933.32	2527.31	3060.32	3445.38	2825.97	3032.7	2880.88	3459.64	3610.8	3136.59	2901.35	3169.34	3281.39	3850.41	2617.2	2761.01	2931.96	3340.07	2490.32	3089.39	2654.19	2116.12	4203.59	4266.95	3850.41	2527.31	4804.51	3895.79	4099.25	3236.32	3966.62
ARHGEF3	3766.97	3566.97	3001.9	3410.26	2981.57	2588.83	3436.63	3030.19	4531.91	5998.36	4560.47	3197.23	3805.21	4248.37	4329.13	3585.24	4939.75	3400.48	3918.97	3858.43	3928.51	3905.41	4394.02	4400.49	3497.89	1868.17	2564.98	3585.24	4440.35	3259.08	2988.12	2970.15	2781.39	3520.38	4640.75	4148.78	3457.13	2680.53	3846.96	2859.98	2027.3	2422.09	1473.51	2955.51	10034.5	4298.26	2656.57	3259.08	5031.39
ARHGEF4	115.075	112.785	116.05	110.686	121.096	112.201	115.14	113.263	119.679	123.337	123.425	123.824	110.418	120.273	123.533	111.337	114.46	113.782	113.332	121.295	122.68	116.989	111.54	114.196	109.253	111.997	108.682	130.29	117.406	129.512	125.62	114.622	112.523	116.249	113.551	111.277	116.751	115.089	116.528	112.992	113.423	112.263	114.409	119.915	112.793	111.602	116.746	119.438	117.842
ARHGEF5	142.386	145.814	138.259	134.692	125.403	123.769	130.1	144.289	130.965	152.36	142.109	154.356	132.652	135.196	141.75	131.931	138.395	125.444	139.14	139.637	137.748	131.936	133.77	131.705	131.103	137.087	135.499	162.828	159.593	144.203	165.601	131.655	136.246	135.638	138.214	137.452	138.518	123.776	134.984	136.306	143.612	143.189	132.019	143.197	118.766	148.817	150.133	155.838	123.642
ARHGEF5L	174.979	191.334	248.625	179.006	178.73	165.572	268.426	193.56	181.572	244.831	193.869	262.68	166.815	159.041	176.919	155.944	158.804	149.14	170.28	147.13	168.432	155.333	159.195	153.149	162.78	186.435	229.239	193.647	198.261	260.62	190.411	157.413	140.738	173.88	202.916	153.137	159.066	144.96	134.786	159.653	319.489	188.335	163.284	221.13	479.683	180.713	203.369	213.12	145.821
ARHGEF6	5676.35	5300.59	5811.86	5190.6	3697.36	3655.73	4758.95	3621.44	4514.91	5214.07	3827.42	3962.44	3909.89	3693.63	3793.22	4178.61	4423.86	3662.98	4218.24	3114.59	3433.92	4116.39	3614.74	3313.58	3846.96	3899.8	3548.2	3365.76	3249.37	3589.04	4014.12	2994.96	3548.2	4531.91	4758.95	4223.48	4547.99	2972.7	3183.76	3288.61	3429.81	2623.13	2291.63	3867.34	6740.23	4111.62	3509.83	3526.75	3697.36
ARHGEF7	130.656	128.823	129.543	135.247	127.098	126.934	122.286	127.515	141.732	133.341	130.938	135.398	131.382	125.285	139.918	146.328	129.76	125.444	139.093	138.035	126.989	140.125	130.952	134.864	132.464	127.718	133.193	132.791	140.329	136.921	133.966	134.65	141.987	137.945	138.628	138.002	133.669	133.947	128.284	142.051	118.876	122.339	124.133	127.427	131.03	132.224	123.315	145.257	129.668
ARHGEF9	178.606	172.304	164.134	159.827	153.368	157.477	172.548	154.563	157.526	178.501	154.284	149.895	142.852	153.56	143.573	153.172	162.59	156.931	155.392	177.867	154.027	153.49	164.78	159.962	154.356	141.923	139.137	161.791	155.544	134.711	151.123	147.541	142.143	151.424	143.444	142.412	149.922	137.579	160.319	144.864	142.737	143.252	138.054	135.402	133.332	167.656	136.995	150.644	130.344
ARID1A	1365.75	1240.17	1229.91	1188.19	1245.99	1223.22	1163.48	1146.65	1194.69	1515.01	951.153	1006.23	959.881	1013.27	1025.41	1074.92	1126.97	1302.98	1150.38	642.179	1047.98	1007.43	950.705	1095.47	1012.29	1227.82	1316.97	818.989	1086.08	1206.16	751.002	849.677	903.854	1146.56	947.756	938.533	694.962	588.637	795.18	851.651	840.034	1055.05	1039.88	1089.09	597.259	970.498	1184.67	1100.63	915.718
ARID1B	125.843	126.113	123.805	120.444	127.996	123.258	122.286	127.792	119.02	126.256	124.238	129.097	126.819	121.519	119.785	134.308	125.357	127.882	124.807	124.194	130.133	123.929	125.156	125.472	126.357	121.272	125.668	127.062	127.046	125.729	123.536	125.61	123.273	130.266	127.512	125.821	130.847	123.272	121.55	128.454	126.194	120.239	122.134	124.623	122.926	124.261	117.537	125.047	117.288
ARID2	347.522	345.262	323.789	316.521	291.441	245.481	322.453	276.702	391.493	407.237	293.511	272.255	288.338	295.323	306.153	307.858	341.716	266.566	291.392	266.437	246.166	325.818	324.715	333.105	383.62	219.788	221.779	338.372	328.271	286.114	245.085	279.115	265.358	368.8	342.985	279.441	287.814	232.675	271.64	301.98	209.023	206.24	187.032	291.35	384.187	300.01	264.045	282.884	314.944
ARID3A	603.431	659.31	606.293	726.271	533.769	768.229	643.083	881.443	810.437	901.536	713.052	1356.68	947.193	741.085	933.888	892.582	844.143	939.675	993.265	1150.05	607.717	825.826	671.664	655.087	645.964	988.191	1096.64	1488.38	1303.86	1144.39	1055.12	909.694	932.981	734.139	674.082	812.511	750.293	929.313	608.317	923.634	1528.01	1035.78	1318.67	1221.99	763.376	998.207	1067.04	990.2	940.97
ARID3B	629.813	594.609	726.101	591.669	491.351	526.748	577.235	682.556	478.647	579.306	703.375	622.337	576.365	545.74	615.908	589.555	653.573	598.061	576.496	619.995	769.047	689.893	616.063	696.659	733.727	550.104	786.409	481.245	518.388	663.541	499.987	628.004	512.022	745.249	568.168	671.664	538.665	477.098	779.7	620.114	673.935	834.2	657.866	499.511	1303.86	540.509	939.445	680.644	582.888
ARID3C	126.944	127.851	128.346	131.325	125.807	120.323	119.092	132.733	119.394	126.906	122.61	121.648	121.672	117.386	121.647	128.952	122.46	122.183	125.686	119.537	123.767	119.371	122.882	126.185	135.359	127.475	124.705	126.681	114.155	115.639	115.662	123.534	123.892	119.493	121.91	127.124	119.366	125.581	119.134	125.35	128.321	122.049	129.653	119.652	123.976	132.068	117.501	123.028	123.814
ARID4A	207.139	170.77	195.461	181.906	199.325	170.559	194.487	174.179	238.227	226.929	185.884	180.684	241.642	222.067	211.531	266.622	281.997	188.52	252.155	217.053	186.415	200.108	238.604	226.526	260.013	156.54	148.86	240.278	174.392	177.1	176.841	197.462	238.77	248.39	268.678	181.439	232.947	182.373	214.293	222.61	136.296	133.116	130.437	230.431	219.37	219.275	195.709	175.578	253.197
ARID4B	440.51	501.038	431.886	519.88	345.367	346.93	563.466	273.942	802.923	1077.31	389.897	319.916	416.58	418.712	413.519	719.359	868.584	581.639	1089.69	359.782	345.617	422.593	389.631	373.897	383.014	361.829	261.436	348.343	300.748	287.04	460.02	456.921	352.857	549.528	511.166	394.595	482.455	421.229	436.257	435.832	401.343	277.431	241.416	339.811	422.734	319.731	280.171	268.533	483.812
ARID5A	130.855	138.804	135.182	130.204	145.1	130.571	131.124	138.651	133.218	135.638	153.75	139.374	140.599	142.672	138.809	138.654	141.13	132.944	125.065	153.27	137.925	153.827	148.894	131.53	137.166	133.258	138.299	132.3	154.674	129.325	138.122	128.559	123.911	129.079	129.808	139.269	134.402	130.276	135.624	131.148	130.161	152.882	162.147	133.544	112.651	134.716	143.901	123.524	134.397
ARID5B	1150.05	940.209	831.887	1031.84	763.212	653.081	944.935	887.994	1305.74	1329.81	870.179	796.789	917.93	985.71	989.683	637.137	837.29	762.652	905.891	1011.6	1353.27	1258.52	1543.92	1616.83	1702.25	745.625	722.874	970.755	1201.06	821.973	883.616	926.809	1061.42	1302.3	1142.27	1225.89	1160.06	725.241	1280.32	1486.88	638.38	578.469	370.048	1260.57	618.11	1231.06	876.253	1082.29	1153.17
ARIH1	303.144	272.992	291.262	285.341	269.647	255.618	285.341	317.023	321.796	301.279	235.031	281.913	307.372	288.971	297.118	291.993	294.713	270.792	314.499	267.865	275.396	337.229	308.821	343.833	343.073	258.216	296.808	305.962	323.596	316.407	250.839	285.647	310.259	321.219	314.971	305.629	296.435	271.56	283.57	345.113	277.884	267.313	280.391	272.844	374.096	261.805	330.795	248.692	307.787
ARIH2	1648.94	1578.71	1705.83	1573.45	1554.59	1366.12	1693.13	1478.42	1268.17	1291.37	1242.62	970.17	959.998	1161.38	1217.41	1019.3	1178.11	1290.42	1162.27	1283.05	1365.45	1197.84	1270.26	1318.27	1160.06	1307.21	1440.71	716.89	978.684	948.351	877.731	1033.79	824.277	1179.66	1051.25	1100.5	978.684	839.292	1171.03	924.213	1032.39	1291.37	884.544	864.033	1110.19	1168.76	954.527	1075.05	930.538
ARL1	507.821	484.282	445.324	451.409	472.409	398.079	445.584	463.216	736.562	693.519	522.325	387.783	464.685	477.46	525.334	530.144	511.589	425.971	514.601	435.486	418.712	491.912	444.712	492.5	432.203	363.543	411.203	456.653	619.846	468.132	549.276	442.135	425.134	477.667	536.014	420.805	559.397	333.438	423.429	422.11	323.081	348.616	281.289	568.529	800.7	538.126	392.351	405.902	627.017
ARL10	116.544	123.567	116.306	119.752	114.362	123.722	115.305	119.255	119.163	126.304	123.828	113.82	116.645	115.027	117.891	110.398	121.165	122.991	120.487	124.209	115.392	116.448	121.662	116.13	107.467	110.987	123.593	120.262	119.649	116.676	115.05	116.318	110.166	120.024	120.269	123.183	115.817	112.564	113.849	124.918	108.856	110.264	120.794	127.378	108.68	125.025	117.041	116.872	122.193
ARL11	138.866	131.155	139.909	135.877	133.984	128.464	131.631	126.347	126.569	128.026	129.399	132.35	139.143	131.476	137.834	139.505	129.298	132.72	129.378	123.311	119.86	124.363	134.301	132.095	135.1	150.817	127.859	144.57	129.701	144.185	123.574	142.463	149.545	139.927	143.585	131.315	129.547	114.347	123.618	139.806	139.818	123.883	136.742	141.27	118.064	130.858	161.172	137.495	127.612
ARL13A	118.951	121.371	125.806	125.532	123.436	120.165	117.704	129.37	119.164	120.373	118.277	117.065	122.27	120.385	118.542	132.042	115.978	145.205	128.562	125.827	114.566	119.656	116.983	127.636	126.048	121.134	121.393	127.614	122.925	125.409	115.097	131.025	122.031	121.716	124.971	129.642	123.331	121.973	124.651	114.498	121.966	126.365	122.428	112.645	124.611	116.165	129.297	120.273	121.737
ARL13B	140.08	131.987	127.094	124.804	126.173	122.659	124.927	126.311	168.7	168.777	140.676	135.784	138.793	135.648	134.135	138.266	146.851	134.21	159.27	131.344	128.537	130.038	136.555	134.664	129.107	120.173	118.094	166.812	153.256	133.287	139.232	132.33	137.918	139.04	155.538	134.365	146.598	133.776	132.035	129.56	119.066	123.85	115.435	139.924	181.844	135.212	120.984	126.551	131.772
ARL14	114.113	113.379	111.253	116.283	110.971	117.061	109.528	113.395	116.396	112.704	117.055	125.235	114.858	111.923	112.513	114.057	115.882	118.81	107.311	119.686	114.818	117.59	113.816	115.697	112.405	114.278	110.824	115.75	116.053	116.304	120.944	116.707	118.153	127.543	118.311	114.87	111.477	117.902	115.168	124.052	112.268	110.061	109.033	118.9	114.82	119.71	112.895	121.827	118.979
ARL15	173.973	172.087	171.88	164.374	161.52	161.884	164.725	160.393	173.38	187.509	159.014	150.637	149.422	154.278	162.8	160.028	172.146	159.243	151.697	147.041	175.009	140.371	163.15	173.216	156.131	161.161	172.692	177.57	168.29	151.147	147.376	156.09	154.995	153.967	156.335	175.84	164.065	177.917	151.596	148.303	167.447	159.064	166.814	166.899	337.339	161.967	155.964	149.541	150.834
ARL16	2732.17	2604.28	2398.72	3029.72	3435.88	3015.8	2824.52	3094.29	1984.82	1079.4	3821.39	2657.54	3634.56	2941.78	2750.72	2678.88	3570.3	3534.74	2885.19	2665.69	2449.81	3429.89	2273.56	2304.4	2523.48	1667.72	1586.75	1488.21	1678.52	3143.16	3207.15	3299.02	3557.67	3909.47	3354.33	2521	1796.4	1560.48	1668.05	3129.36	1546.12	1406.38	810.041	4259	720.782	2491.54	3402.42	3292.96	2913.3
ARL17B	150.068	131.625	160.562	154.858	145.2	157.369	149.929	188.725	155.722	151.821	152.325	159.23	177.336	162.042	158.955	156.976	142.476	165.663	151.808	189.039	160.825	148.305	137.704	166.173	147.302	150.316	192.079	168.526	167.161	187.135	145.764	179.185	185.116	150.162	148.996	143.967	177.312	143.425	173.739	140.374	158.551	163.31	230.779	162.24	262.795	173.497	162.536	167.555	139.818
ARL17P1	213.978	182.512	229.68	226.929	176.545	190.09	199.405	231.489	232.947	341.811	195.583	208.541	195.335	180.988	185.985	270.722	211.195	223.335	213.221	180.768	199.388	162.21	141.501	230.541	198.302	176.331	198.456	178.035	175.895	189.659	194.151	202.448	210.6	228.043	183.465	180.669	207.849	178.163	188.808	154.998	175.293	187.358	181.182	173.043	426.995	214.039	195.822	200.014	170.807
ARL2	1433.95	1943.68	1548.92	1359.59	1834.06	1813.56	1465.78	1370.57	466.114	528.604	745.03	765.237	638.243	712.851	726.994	795.581	766.549	1121.67	789.231	943.67	1057.31	803.165	821.973	845.199	751.644	1874.99	1676.69	469.961	542.335	943.191	993.57	863.541	663.23	682.251	552.911	744.59	625.193	879.01	1075.05	611.779	1855.62	2283.97	1982.2	601.576	1372.92	671.344	1163.71	1418.28	601.097
ARL2BP	1872.77	1685.71	1755.33	1497.11	1660.18	1141.53	1560.82	1265.38	2048.45	2072.12	1548.03	1569.33	1655.33	1756.21	1758.26	1958.72	1780.74	1699.72	1756.21	1501.23	1640.89	1775.68	1946	1770.18	1661.12	1445.77	1376.44	1497.77	1820.82	1247.32	1436.96	1491.07	1406.49	1838.52	1823.69	1572.05	1586.04	1450.03	1605.44	1311.62	1267.8	1590.59	1282.19	1697.13	1234.68	1694.03	1056.76	1727.92	1512.08
ARL3	141.228	131.248	148.711	144.048	145.696	134.126	137.002	153.007	185.745	189.839	170.953	178.937	174.392	174.726	178.176	158.817	164.272	152.347	164.282	159.953	176.129	177.78	170.992	158.833	149.415	137.455	129.614	155.744	149.297	159.443	158.014	163.904	148.334	172.881	150.283	143.2	151.054	156.72	195.643	159.637	146.005	145.664	138.986	155.154	202.468	165.572	140.083	159.687	129.454
ARL4A	165.879	152.605	182.512	178.132	164.073	184.333	149.339	177.1	150.359	142.159	144.056	161.279	158.605	162.599	154.725	166.638	169.727	148.288	169.798	160.058	151.624	154.033	179.62	150.435	182.143	233.961	191.301	163.794	156.587	181.279	151.808	169.684	171.788	172.687	165.641	173.916	180.581	288.21	182.013	194.063	255.189	194.565	176.342	160.161	122.895	166.574	165.92	182.792	132.865
ARL4C	709.162	561.594	393.411	496.608	613.145	438.531	620.962	483.213	699.468	699.609	514.709	357.249	405.139	566.497	481.156	692.805	805.196	499.828	564.017	689.893	523.236	669.333	575.364	659.996	638.605	257.578	310.067	392.264	408.615	324.785	434.973	331.226	327.131	439.646	437.559	342.899	526.895	412.909	384.789	410.841	237.592	345.791	206.611	376.747	134.775	386.762	265.065	397.651	487.189
ARL4D	135.306	143.963	140.85	134.085	149.914	148.692	149.256	138.617	133.587	144.401	148.271	147.566	139.727	127.694	122.162	138.05	131.677	136.963	136.672	131.231	139.88	134.367	146.484	152.545	125.898	142.301	136.047	138.175	141.14	128.988	138.739	151.185	130.764	135.589	137.777	134.563	131.934	135.996	143.806	124.043	153.567	140.212	144.09	130.658	128.823	138.463	128.798	134.575	122.601
ARL5A	1249.92	936.928	924.734	1044.26	961.1	778.098	1078.34	1105.72	940.97	814.056	877.2	618.502	959.118	1001.94	928.769	953.875	1221.06	888.697	945.201	606.393	692.303	839.476	853.41	950.577	922.507	877.457	942.651	909.396	958.525	869.941	763.212	839.738	856.975	1160.06	1277.47	997.854	1084.47	979.566	641.943	783.304	631.635	762.131	700.061	737.349	2001.78	895.832	890.374	881.153	1154.51
ARL5B	139.525	150.953	140.129	150.042	137.34	135.525	145.84	150.359	151.753	180.961	147.725	136.091	157.031	150.398	135.238	142.567	149.087	135.936	147.608	188.756	135.945	160.04	141.476	151.794	170.371	134.801	147.499	191.024	210.563	158.865	144.853	151.242	159.237	144.96	148.814	145.106	158.039	142.339	153.566	197.982	139.633	141.36	136.239	152.356	363.426	152.339	152.223	138.826	193.564
ARL5C	118.445	119.071	127.319	120.633	129.634	119.704	117.884	117.004	130.008	125.546	132.776	120.937	137.145	124.563	149.256	122.366	123.65	120.255	113.829	121.032	120.34	125.132	121.655	123.237	127.801	131.619	118.96	116.577	117.564	115.86	119.689	125.76	121.228	114.625	112.4	121.935	126.088	143.844	125.35	119.652	124.567	118.43	127.329	111.054	130.738	111.52	131.45	123.612	119.501
ARL6	115.912	112.67	112.106	116.318	117.583	115.862	115.61	118.397	124.404	125.626	118.646	118.676	119.03	120.965	122.391	117.733	117.795	115.302	120.23	115.728	117.536	115.489	117.641	120.751	118.622	118.382	115.484	118.304	121.069	115.704	117.977	118.992	120.558	117.62	123.596	119.793	118.213	119.076	114.927	121.021	113.435	112.692	112.399	119.674	120.12	119.278	119.534	118.212	118.53
ARL6IP1	2261.45	1997.69	2022.29	2066.55	1812.37	1493.79	2279.52	1939.48	2740.45	2976.23	1765.65	1814.34	1932.28	2039.23	2313.97	2516.41	2490.65	1940.39	2382.69	1914.65	1558.3	2115.5	2069.93	2251.31	2035.05	1614.4	1854.65	2497.66	2448.63	1452.83	1982.35	1541.71	2343.19	2616.18	2973.73	2301.05	2672.73	2269.53	1785.79	2226.08	1677.82	1278.69	1185.21	1973.11	748.571	2419.2	1480.05	1428.88	2663.03
ARL6IP4	365.232	467.976	367.221	324.064	396.708	406.679	337.708	434.615	423.429	339.932	501.703	457.784	414.58	435.404	400.744	367.798	352.563	436.07	349.158	856.752	541.779	508.884	565.528	438.846	597.813	396.628	418.635	431.135	412.301	389.349	488.15	487.308	425.276	339.117	372.041	473.477	425.585	640.324	584.288	435.911	402.373	423.579	550.577	429.436	123.802	488.335	368.161	486.531	341.919
ARL6IP5	8414.97	7030.71	8330.4	8060.65	7664.42	5676.35	6812.95	6717.55	8414.97	9206.27	6298.48	6263.01	6825.73	7907.27	6987.81	6553.11	7117.45	7219.1	7117.45	5190.6	6285.77	7891.16	8011.98	7399.12	6516.58	5776.13	5628	5486.06	6204.38	6383.18	6370.73	5534.78	8217.85	7167.94	7399.12	6460.06	8515.07	6688.72	5724.06	7646.6	5205.46	5221.73	5008.84	6370.73	14782.3	7117.45	6965.7	6977.66	6359.46
ARL6IP6	481.323	371.08	527.863	450.187	486.488	449.103	470.962	527.149	554.594	401.278	346.034	403.705	456.231	503.799	482.937	472.815	445.573	391.52	435.511	381.836	431.395	346.836	453.496	512.71	456.021	460.991	431.074	678.094	712.176	468.212	307.821	292.741	556.254	514.489	565.631	573.602	466.038	343.1	426.099	527.21	479.172	388.675	398.015	625.09	251.92	480.505	439.547	449.537	637.007
ARL8A	122.202	123.627	119.531	126.629	128.174	118.765	118.969	132.196	124.197	122.813	123.603	123.266	132.993	116.735	127.959	120.337	136.115	123.104	120.263	131.492	125.476	124.048	122.409	121.672	127.896	119.287	123.029	117.965	129.125	132.373	120.079	127.594	125.702	119.887	127.312	121.804	123.572	125.591	119.444	121.171	122.119	125.865	128.337	130.479	133.691	115.008	129.25	136.934	149.595
[truncated: 30,420 more rows]
[truncated: 6 more columns]
