# Supplementary material for: Exploration of Potential Integrated Models of N6-Methyladenosine Immunity in Systemic Lupus Erythematosus by Bioinformatic Analyses
Source: Front Immunol. 2022 Feb 7;12:752736. doi: 10.3389/fimmu.2021.752736 (PMC8859446; doi:10.3389/fimmu.2021.752736)
Supplement: Supplementary Table 9 — Datas of the gene expression of GSE122459. [file Table_9.xlsx]

## Sheet: Sheet1
name	Healthy1	Healthy2	Healthy3	Healthy4	Healthy5	Healthy6	SLE1	SLE2	SLE3	SLE4	SLE5	SLE6	SLE7	SLE8	SLE9	SLE10	SLE11	SLE12	SLE13	SLE14	SLE15	SLE16	SLE17	SLE18	SLE19	SLE20
TSPAN6	30.9698	21.2666	18.1572	20.5824	17.8865	16.1742	29.6695	7.80731	12.6748	41.5632	33.1119	4.18942	24.4257	14.4081	37.8315	51.2347	6.29525	27.8426	30.4309	13.3371	10.2297	21.6052	38.386	17.8497	26.7194	15.1421
TNMD	0	0	0	0	0	0	0	0	0	0	0	0	0	0	0	0	0	0	0	0	0	0	0	0	0	0
DPM1	634.463	616.732	696.026	662.752	726.191	527.683	592.491	520.487	480.667	640.073	634.354	592.384	603.664	681.985	559.168	577.174	622.181	608.254	656.437	595.725	577.981	649.958	1053.63	770.884	842.689	879.506
SCYL3	569.175	516.943	499.756	506.326	333.881	597.434	491.795	486.656	458.242	524.62	519.334	489.325	456.237	548.47	655.131	427.653	438.569	465.829	374.952	551.268	347.811	431.205	473.869	489.751	464.507	335.651
C1orf112	264.499	230.661	231.721	268.394	238.486	198.134	258.035	219.472	253.496	258.615	312.82	292.422	278.279	340.032	307.266	248.854	262.302	204.536	242.36	267.632	283.364	265.564	222.374	249.896	287.748	218.299
FGR	13443.4	13225.4	19324.5	15439.2	18584.1	19442.4	9152.6	21087.5	16244.2	10761.2	9154.57	17025	13069.5	10921.4	12612.7	7775.12	40427.1	15316.7	20804.9	16727.4	23055.8	14980.5	5926.01	23163.3	16581.5	17577.5
CFH	60.2656	204.487	389.948	184.418	143.092	126.361	108.788	202.99	211.571	145.009	33.9833	157.522	68.9154	157.529	192.849	147.43	111.216	209.891	141.286	224.953	171.86	134.133	144.278	76.9768	397.708	309.152
FUCA2	295.469	453.961	543.852	582.892	761.964	582.271	461.226	716.537	640.564	381.458	429.583	775.043	672.579	564.799	488.119	354.46	849.859	724.979	705.344	539.709	580.027	566.237	284.586	1070.98	815.97	635.97
GCLC	880.547	980.719	888.839	960.785	1290.21	899.689	1006.97	856.201	945.734	909.772	939.332	1066.63	862.751	977.833	839.675	828.12	1167.77	806.365	1287.88	1005.62	1080.26	784.99	869.642	996.236	1118.1	868.15
NFYA	1554.35	1482.94	1493.21	1399.6	1729.03	1448.6	1414.25	1534.57	1443.95	1677.31	1393.31	1356.54	1564.12	1144.01	1408.99	1453.39	1481.48	1654.49	1267.23	1410.18	1358.51	1523.17	1800.17	1673.41	1469.57	1641.66
STPG1	92.0724	100.607	107.214	87.2692	67.9686	111.198	99.7975	61.591	82.8736	107.141	141.161	84.6263	103.809	92.2121	128.258	100.378	30.4271	112.441	84.7717	102.251	55.2406	121.529	107.216	74.7456	110.988	74.4489
NIPAL3	1316.64	1426.5	1478.52	1624.36	1100.61	1804.43	1735.22	1444.35	1521.95	1809.38	2120.03	1565.17	1949.69	1818.31	1925.72	1584.09	1272.69	1821.55	1530.24	1685.81	1093.56	1937.27	1501.03	1300.8	1681.27	1491.5
LAS1L	1365.18	1386.42	1271	1283.52	1304.52	1233.28	1201.17	1179.77	1145.61	1167.46	1139.75	1064.11	1265.77	1332.27	1315.8	1351.97	933.796	1194.02	1156.37	1092.75	1077.19	1353.93	1245.56	1164.69	1166.41	1154.59
ENPP4	747.461	632.273	888.839	745.905	1153.08	621.695	804.673	747.767	599.615	624.371	684.022	581.492	634.196	960.543	589.618	520.712	1782.61	476.537	799.897	689.084	498.189	592.344	657.857	495.329	683.401	1408.22
SEMA3F	0	0	0	0	22.6562	1.01089	11.688	0.867479	1.94997	22.167	7.84229	0	12.2129	1.92109	2.76816	17.7753	3.14763	4.28348	15.2154	0	11.2527	8.10196	2.64731	0	12.332	3.78554
CFTR	0	0	0.864629	0	0	0	0	0	0.974983	0	0	0	0	0	0	0	1.04921	0	0	0	1.02297	0	0	0	0	0
ANKIB1	1735.15	1453.49	1795.83	1845.83	1510.81	1780.17	1932.12	1744.5	1842.72	1492.58	1719.21	2336.02	1826.69	2285.13	2005.99	1770.21	2070.09	1599.88	1697.61	2037.91	1769.75	1840.05	1775.02	1718.03	1872.41	1733.78
CYP51A1	15.0664	16.3589	7.78166	5.76306	26.2335	14.1524	16.1834	12.1447	6.82488	16.6253	9.58503	15.9198	13.9575	18.2503	21.2226	14.6385	8.39367	17.1339	18.4759	16.0045	18.4135	15.3037	19.8548	22.3121	28.7748	22.7132
KRIT1	937.465	835.942	943.31	932.793	792.967	941.136	1100.47	961.166	1197.28	1027.07	1097.05	1027.25	1018.9	1051.79	1058.36	987.052	930.648	975.563	882.495	1023.4	892.034	984.839	824.637	731.837	815.97	694.015
RAD52	469.569	336.176	348.446	300.502	290.953	469.052	385.704	445.884	583.04	451.653	344.19	388.778	451.876	408.231	297.116	331.457	365.125	459.403	344.521	416.118	351.903	381.693	268.702	284.479		182.968
MYH16	3.34809	0	0.864629	0	0	3.03266	3.59631	2.60244	2.92495	2.77088	1.74273	0.837885	3.48939	3.84217	0.92272	4.18242	0	0	2.17363	0.889141	0	1.80044	2.64731	0	0	0
BAD	72.8209	90.7921	72.6288	74.0965	98.9719	88.9581	93.5039	86.7479	70.1988	95.1335	102.821	82.9506	81.1282	101.818	92.272	94.1045	93.3796	83.5279	98.9003	80.9119	117.642	87.3212	71.4774	97.0577	88.3796	94.6384
LAP3	2354.54	1911.54	1767.3	2742.39	2663.89	2561.59	3699.7	3584.42	2845.98	1487.96	1210.33	6820.38	5084.91	4223.51	1877.74	3052.12	8430.39	1438.18	6764.34	3651.7	5232.52	5843.32	3351.5	7124.26	5460.01	5692.18
CD99	3445.18	3827.17	4624.04	3646.37	7283.38	5024.11	5211.05	5948.3	4584.37	4825.95	6112.63	6372.95	3919.45	6367.44	5196.76	3532.06	5460.08	6168.21	6956.71	5196.14	7445.21	4792.76	2518.92	4366.48	4410.76	4998.17
HS3ST1	75.332	70.3435	60.524	50.221	50.0822	84.9145	44.0547	159.616	190.122	36.0214	119.377	37.7048	25.298	21.1319	274.048	73.1924	17.8365	38.5513	42.3858	101.362	35.8041	61.2148	68.8301	36.815	18.4981	20.1895
AOC1	2.51107	16.3589	1.72926	3.29318	14.3092	13.1415	0	24.2894	17.5497	3.69451	2.6141	1.67577	6.10643	1.92109	2.76816	3.13682	11.5413	0	1.08682	1.77828	1.02297	12.6031	0	3.34682	3.08301	2.52369
WNT16	22.5996	44.1691	32.8559	34.5784	9.53946	31.3375	50.3483	43.3739	44.8492	18.4725	68.8379	37.7048	17.4469	33.619	53.5178	44.961	14.6889	35.3387	49.9935	110.254	5.11487	30.6074	18.5312	11.1561	48.3005	18.9277
HECW1	0	4.90768	0	0.823294	0	1.01089	0	0.867479	0	3.69451	0	0.837885	0.872347	1.92109	0.92272	0	0	0	0	0	6.13785	0	2.64731	1.11561	3.08301	0
MAD1L1	1823.87	1384.78	1523.48	1168.25	1135.2	1808.48	1726.23	1591.82	1534.62	1247.82	1434.27	1436.13	1312.88	1361.09	1409.92	1097.89	927.501	1395.34	1638.92	1276.81	1646.99	1550.18	1058.92	1465.91	1261.98	1062.47
LASP1	6948.12	6302.28	8610.84	7002.94	8496.08	7968.82	6364.56	7261.66	5807.97	6083.93	6791.43	8825.44	6875.84	7787.12	7735.16	5619.09	9851.02	7707.05	8394.57	8132.09	8634.93	6959.59	4328.35	7543.73	6175.27	5733.83
SNX11	723.187	892.38	988.271	858.696	827.548	1021	699.481	994.998	902.834	725.047	713.649	1123.6	888.049	866.41	832.294	612.725	1332.5	959.5	850.977	900.7	981.033	914.622	794.193	1092.18	830.357	875.721
TMEM176A	11.7183	472.773	1420.59	2854.36	2291.85	1683.13	86.3113	2503.54	2223.94	1053.86	117.634	5.86519	1274.5	74.9223	239.907	110.834	518.309	209.891	14.1286	169.826	136.056	2713.26	45.0043	2643.99	78.1029	1562.16
M6PR	3722.24	3859.89	4032.63	3784.68	3119.4	3282.35	3008.31	3554.06	3080.95	2580.61	2799.7	3690.04	2977.32	3118.88	3198.15	2469.72	3633.41	3265.08	3615.84	4009.14	4213.63	3038.24	2305.81	4473.58	3812.66	2748.3
KLHL13	40.1771	31.082	19.0218	22.229	9.53946	10.1089	6.29353	15.6146	19.4997	20.3198	18.2987	5.02731	22.681	6.7238	9.2272	16.7297	10.4921	24.63	20.6495	9.78055	13.2987	17.1041	6.61828	8.92485	12.332	16.404
CYP26B1	0	0	6.91703	0	0	0	0	0	0	0	0	0	0	0.960543	0	0	0	1.07087	2.17363	0.889141	2.04595	0	0	0	0	0
ICA1	54.4064	66.2537	72.6288	62.5704	63.1989	59.6423	99.7975	78.0731	81.8986	76.661	101.95	192.713	61.0643	86.4489	190.08	64.8276	113.315	116.725	81.5112	72.0204	135.033	96.3233	59.5645	158.416	221.977	102.209
DBNDD1	144.805	140.687	148.716	171.245	129.975	195.101	103.394	129.254	154.047	103.446	218.713	10.8925	173.597	61.4747	110.726	96.1957	14.6889	136.001	51.0804	133.371	61.3785	77.4188	88.6849	50.2023	51.3835	75.7107
ALS2	403.445	456.414	485.922	507.973	680.879	508.476	473.813	595.09	620.089	520.002	418.256	386.265	539.983	462.982	443.828	386.874	610.64	534.364	456.463	363.659	550.36	498.721	405.039	349.185	529.25	562.783
CASP10	2365.42	1622.81	1813.13	1882.87	1645.56	2182.5	1587.77	2179.11	2143.99	1680.08	1287.01	2273.18	2174.76	2282.25	2291.11	1863.27	3337.53	1627.72	1961.7	2144.61	2128.81	1679.81	1387.19	2012.55	1594.94	1859.96
CFLAR	3153.9	3243.98	3657.38	3595.33	4023.27	3512.83	3568.43	4190.79	4042.28	3541.18	3831.4	4711.43	3565.28	4043.89	3391.92	3287.38	6671.92	3681.65	3608.23	3927.34	3855.59	3345.21	3109.27	4008.37	3472.5	4604.47
TFPI	10.0443	10.6333	19.8865	33.7551	16.6941	18.196	12.5871	41.639	22.4246	20.3198	45.311	15.9198	15.7022	24.9741	7.38176	10.4561	23.0826	14.9922	33.6913	29.3417	36.8271	10.8026	23.8258	11.1561	10.2767	23.9751
NDUFAF7	431.066	371.348	418.48	391.065	318.379	454.899	375.814	363.474	441.667	343.589	393.857	371.183	328.875	385.178	402.306	376.418	338.894	386.584	341.26	404.559	332.467	372.69	299.146	326.872	385.376	400.005
RBM5	3677.04	3855.8	3897.75	3940.29	2837.99	3482.51	3170.14	3559.26	4006.21	3447.9	3150.86	3355.73	3189.3	3328.28	3198.15	3354.3	3105.66	3147.29	2858.33	3299.6	2978.9	3175.97	3604.31	2994.29	2779.85	3169.76
MTMR7	65.2877	50.7127	44.9607	47.7511	72.7384	69.7512	77.3206	64.1934	92.6234	95.1335	80.1657	93.0052	95.9581	67.238	59.9768	97.2413	78.6907	96.3783	60.8617	75.577	107.412	78.319	59.5645	55.7803	95.5733	68.1397
SLC7A2	0	0.817947	0	0	0	0	0	0	0	0	0	0	0	0	0	0	0	0	0	0	0	0	0	0	0	0
ARF5	1672.37	1859.19	1881.43	1739.62	2427.79	1752.88	1654.3	1623.92	1437.13	1706.86	1400.29	1624.66	1825.82	1484.04	1654.44	1286.1	1881.23	2047.5	1724.78	1555.11	2288.39	1748.22	1403.07	2290.34	2133.44	2035.36
SARM1	226.833	242.112	200.594	205	206.291	332.582	302.09	266.316	255.446	298.331	312.82	297.449	236.406	303.532	303.575	301.134	269.647	278.426	242.36	326.315	204.595	265.564	203.843	176.266	203.479	170.349
POLDIP2	1219.54	1441.22	1404.16	1333.74	1862.58	1508.24	1688.47	1602.23	1350.35	1620.96	1442.11	1886.08	1616.46	1759.71	1685.81	1608.14	1802.54	1642.72	1745.43	1611.12	1752.36	1692.41	1640.01	1783.85	1740.87	1655.54
PLXND1	3025	3955.59	5044.25	3539.34	8079.92	4801.71	2470.66	6332.59	5627.6	4668.01	2353.56	3430.3	4875.54	4103.44	3090.19	2142.45	7601.52	8330.3	5086.3	3262.26	7542.39	4603.72	827.285	4239.3	3075.82	7261.92
AK2	2718.65	2750.76	2849.82	2798.38	2896.42	3011.43	2441.89	2835.79	2632.45	2342.32	2387.54	3338.97	2855.19	2697.2	2899.19	2502.13	3402.58	2865.65	2871.37	2783.9	2868.42	2733.06	2550.68	3602.29	3343.01	2824.01
CD38	942.487	356.625	501.485	581.246	497.244	600.467	1032.14	719.14	456.292	438.723	738.047	1340.62	735.388	4281.14	1542.79	1624.87	3136.09	219.528	1473.72	825.123	852.138	1693.31	1118.49	1104.45	1023.56	1509.17
FKBP4	970.109	656.812	952.821	820.825	605.756	667.185	630.253	577.741	538.191	532.009	599.5	645.171	585.345	656.051	811.994	650.367	697.724	538.648	578.186	720.204	576.958	700.37	603.587	908.103	673.124	622.09
KDM1A	1689.95	1581.91	1893.54	1509.92	1750.49	1611.35	1594.96	1648.21	1685.75	1668.07	1632.07	1415.19	1738.59	1754.91	1804.84	1749.3	1421.68	1715.53	1793.25	1721.38	1575.38	1582.58	1613.54	1404.55	1650.44	1372.89
RBM6	4938.43	6199.22	7260.29	5635.45	3109.86	4607.62	3816.58	4260.19	4559.02	2912.19	3611.81	4433.25	3277.41	4204.3	5234.59	3241.38	4787.54	3869.05	3593.01	4370.13	3638.72	3933.05	3400.47	3420.45	4611.15	4184.28
CAMKK1	381.682	472.773	477.275	368.013	475.78	664.153	301.191	639.332	468.967	525.543	430.455	317.558	287.002	211.319	253.748	352.369	772.218	380.159	446.681	408.116	605.601	359.187	350.769	348.069	387.432	340.698
RECQL	1412.06	1496.03	1655.76	2106.81	1119.69	1343.47	1208.36	1375.82	1286.98	919.008	1363.69	1535.84	1250.07	1604.11	1595.38	1138.66	1466.79	926.303	1374.82	1550.66	1106.86	1172.08	1174.08	1443.59	1601.11	1327.46
CCDC132	666.27	739.424	730.612	680.041	537.787	714.697	612.271	668.826	734.162	555.099	601.243	761.637	588.834	623.392	674.508	638.865	692.478	625.388	516.238	702.422	546.269	618.45	767.72	660.439	729.646	570.354
HSPB6	0	0	0	0	0	1.01089	0.899076	1.73496	0.974983	0	0.871366	0	0.872347	0	1.84544	0	1.04921	0	2.17363	0	1.02297	0	0	0	0	0
ARHGAP33	385.03	475.227	565.467	619.941	888.362	779.394	640.142	774.658	802.411	812.791	769.416	685.39	787.729	891.384	585.927	701.601	568.671	555.782	737.948	593.057	648.566	695.869	361.358	323.526	354.546	465.621
NDUFAB1	528.998	545.571	468.629	473.394	589.062	548.912	507.978	490.993	417.293	461.813	501.035	559.707	515.557	652.209	567.473	497.708	530.9	510.805	596.662	464.132	522.74	527.528	518.873	626.97	695.733	561.521
PDK4	748.298	394.251	273.223	419.057	115.666	877.45	404.584	489.258	412.418	143.162	93.2362	284.881	94.2134	133.515	525.951	100.378	3633.41	577.199	1666.09	526.372	1502.75	431.205	74.1247	229.815	299.052	239.751
SLC22A16	35.992	17.9948	69.1703	14.8193	95.3946	104.121	19.7797	135.327	177.447	25.8615	18.2987	120.655	52.3408	38.4217	36.9088	27.1857	68.1986	78.1735	39.1254	8.89141	53.1947	54.9133	10.5892	87.0172	41.1068	127.446
ZMYND10	84.5392	86.7024	108.943	68.3334	59.6216	59.6423	35.064	58.1211	60.449	39.7159	30.4978	65.355	36.6386	48.0271	53.5178	40.7786	60.8541	63.1814	30.4309	40.0114	54.2177	24.3059	35.7387	37.9306	18.4981	47.9501
ABCB5	1.67404	0	2.59389	0	0	0	0.899076	0.867479	0.974983	0	0	0.837885	0	0.960543	0	1.04561	0	1.07087	0	0.889141	0	0	1.32366	1.11561	1.02767	1.26185
ARX	0	0	0	0.823294	0	1.01089	0	0	0	0.923626	0	1.67577	0	0	1.84544	0	0	0	1.08682	0	0	0	0	1.11561	0	0
SLC25A13	349.038	385.253	333.747	326.025	522.285	393.235	322.768	448.486	479.692	360.214	331.99	371.183	429.194	351.559	336.793	326.229	458.504	389.797	416.251	376.107	530.924	382.593	329.59	441.78	392.57	389.91
ST7	132.25	140.687	125.371	139.137	207.483	130.404	129.467	144.869	129.673	96.9808	142.033	130.71	123.873	197.872	113.495	86.7853	158.431	114.583	183.672	155.6	191.296	135.033	63.5355	137.22	174.704	143.85
CDC27	1203.64	1103.41	1210.48	1191.31	1231.78	1245.41	1425.94	1221.41	1345.48	1137.91	1299.21	1403.46	1233.5	1505.17	1453.28	1538.09	1396.5	1114.78	1361.78	1251.91	1225.52	1346.73	1495.73	1380	1566.17	1514.21
SLC4A1	21.7626	8.99742	19.0218	20.5824	50.0822	94.0125	2666.66	432.004	50.6991	170.871	65.3524	135.737	53.2131	0.960543	490.887	2619.24	389.256	156.347	27.1704	136.039	973.872	921.823	279.291	41.2774	70.9092	7.57107
CALCR	0	0	0	0.823294	0	2.02177	0	0.867479	0.974983	0	0	0	0.872347	0	0	0	0	0	0	0.889141	1.02297	0	0	0	0	0
HCCS	285.425	296.915	396	306.266	295.723	320.451	226.567	343.522	268.12	192.114	237.883	360.29	275.662	343.874	334.025	245.717	434.372	247.371	317.35	367.215	299.732	252.061	317.677	355.878	356.601	288.963
DVL2	957.553	1044.52	937.258	960.785	883.592	961.353	1015.06	951.624	811.186	1021.53	1090.08	966.919	829.602	944.214	1050.98	1076.97	827.826	942.366	979.221	1022.51	888.965	1007.34	1015.24	857.901	736.839	635.97
PRSS22	8.37022	15.541	7.78166	13.1727	34.5805	23.2504	5.39446	1.73496	2.92495	21.2434	6.09956	0	6.10643	1.92109	0	5.22803	15.7381	18.2048	2.17363	8.00227	8.1838	0	3.97097	2.23121	1.02767	0
UPF1	3187.38	3140.92	3397.99	2990.21	4884.2	3817.11	3429.98	3675.51	3320.79	3826.58	3531.65	3742.83	3548.71	3852.74	3852.36	3815.42	4643.8	3411.79	4002.74	3976.24	3853.55	3782.72	2910.72	2787.9	2759.29	3224.02
SKAP2	2151.98	2209.28	3010.64	2464.12	4205.71	2985.15	2113.73	3939.22	3135.55	2314.61	3382.64	3046.55	3078.51	2457.07	3124.33	1997.11	5570.25	3434.28	3363.7	2988.4	4008.02	2503.51	1511.61	3950.36	3122.06	2702.87
SLC25A5	4356.7	3798.55	3748.17	3764.1	4866.32	3799.92	3051.47	2985.86	2642.2	3621.54	3037.58	3211.61	4097.41	3871.95	3639.21	3118	3540.03	3575.64	3826.68	2675.43	4383.45	3166.97	3728.74	4665.46	4030.52	4045.48
CCDC109B	2562.96	2233	1774.22	2092.81	2533.92	2786	3427.28	2535.64	2422.83	3125.55	2578.37	2667.82	3338.47	2458.99	3166.78	3231.97	2199.14	3405.37	3164.81	2697.65	2646.44	3053.54	3523.57	2978.67	3284.43	2682.68
HOXA11	0	0	0	0	3.5773	0	0	0	0	0	0	0	0	0	0	0	0	0	0	0	0	0	0	0	0	0
POLR2J	547.413	562.748	645.013	637.23	847.819	643.935	685.096	579.476	467.992	623.448	555.06	537.922	642.047	524.456	613.609	470.523	586.508	746.397	669.479	593.057	764.162	561.736	475.192	815.508	642.294	651.112
DHX33	641.159	645.36	724.559	680.865	591.446	667.185	628.454	674.031	662.989	597.586	619.541	741.528	669.962	738.657	663.436	601.223	713.462	655.373	554.276	641.96	577.981	544.632	532.109	591.271	626.879	551.426
MEOX1	40.1771	67.0717	91.6507	85.6226	26.2335	170.84	53.0455	22.5544	22.4246	70.1956	53.1533	91.3294	84.6176	53.7904	101.499	67.9644	50.362	48.1892	47.8199	20.4502	54.2177	50.4122	43.6806	61.3583	77.0752	23.9751
THSD7A	1.67404	0.817947	2.59389	1.64659	27.4259	3.03266	0	14.7471	10.7248	15.7016	0.871366	0	6.10643	0	6.45904	5.22803	2.09842	1.07087	0	6.22399	18.4135	4.50109	2.64731	2.23121	0	3.78554
LIG3	685.521	507.127	749.633	754.138	578.33	748.056	697.683	695.718	776.087	750.908	771.159	729.798	726.665	885.62	764.012	791.524	829.924	757.105	702.083	793.114	725.289	736.378	544.022	591.271	545.693	604.424
RPAP3	1051.3	969.267	948.498	849.64	642.721	878.461	728.252	975.913	831.661	724.123	918.42	1000.43	918.581	974.951	1104.5	944.182	1029.27	835.279	977.048	1093.64	820.426	820.099	992.742	928.184	921.82	649.85
ACSM3	99.6056	98.1537	85.5983	105.382	72.7384	115.241	58.44	54.6512	55.574	112.682	113.278	62.8413	88.9793	73.0013	68.2813	102.469	55.6081	99.591	60.8617	68.4639	75.7001	73.8179	105.892	41.2774	62.6879	50.4738
	31.8068	35.1717	41.5022	30.4619	39.3503	51.5552	34.1649	44.2414	45.8242	29.556	33.1119	45.2458	34.8939	47.0666	44.2906	26.1401	44.0668	34.2679	43.4726	26.6742	95.1367	40.5098	19.8548	39.0462	31.8578	45.4264
CIAPIN1	1002.75	970.085	939.852	876.809	859.744	777.372	676.105	759.044	790.711	694.567	670.08	769.178	727.537	795.329	721.567	740.289	862.45	627.53	804.244	738.876	701.761	712.973	872.289	874.635	838.579	1044.81
SPPL2B	2578.03	3252.16	2183.19	2267.35	3245.8	3324.81	2787.14	3312.03	3410.49	3398.02	3691.11	2516.17	2904.04	2845.13	3571.85	3527.87	2210.68	2814.25	3015.91	2829.25	2298.62	3217.38	1989.45	1946.73	1643.24	1834.72
FAM214B	990.197	1064.15	1545.96	1262.93	1630.05	1736.7	1052.82	1870.28	1388.38	1344.8	997.714	1883.56	1367.84	1124.8	1424.68	1018.42	2880.08	1651.28	2082.34	1713.38	2049.02	1511.47	444.748	1479.29	1078.03	912.314
COPZ2	55.2435	38.4435	43.2315	55.984	84.6627	30.3266	29.6695	46.8438	36.0744	38.7923	34.8546	46.0837	44.4897	40.3428	31.3725	8.36485	100.724	26.7718	53.254	44.4571	53.1947	33.3081	21.1785	52.4335	30.8301	37.8554
PRKAR2B	656.225	809.768	1191.46	1451.47	2242.97	1483.98	1008.76	2808.03	1747.17	1502.74	3862.77	1380.83	1159.35	1275.6	1323.18	720.422	2047.01	1135.12	2805.07	1820.96	5441.2	1056.86	311.059	852.323	1048.22	922.409
MSL3	3697.96	4191.98	3551.9	3874.42	2662.7	3933.36	3891.2	3813.44	4016.93	3809.04	3542.97	3524.14	3986.62	3467.56	3301.49	4259.8	3488.62	3569.21	3080.04	3600.13	2810.11	3123.76	3698.29	3517.5	3050.12	3099.09
CREBBP	6743.05	5777.98	6866.88	7150.31	10802.2	8835.15	10221.6	9470.26	10526.9	10827.7	10551.4	8897.5	10247.5	9476.72	9187.53	9718.9	9903.48	10722.6	9853.07	9918.37	11243.5	11162.7	7990.91	6277.51	7281.04	8681.5
BZRAP1	2662.57	2613.34	2695.05	2696.29	5351.64	2432.19	1920.43	2079.35	1725.72	2960.22	2278.62	2619.23	3587.96	3809.51	1734.71	2055.66	3159.17	1574.18	2952.88	3422.3	4206.47	2669.15	996.713	1393.39	1394.55	1621.47
MPO	74.495	229.025	168.603	164.659	159.786	359.876	92.6049	229.014	168.672	150.551	124.605	183.497	149.171	214.201	484.428	684.872	4212.57	1751.94	141.286	150.265	270.065	332.181	191.93	262.167	115.099	150.16
PON1	0	0	0.864629	0	0	1.01089	0	1.73496	0	2.77088	1.74273	0.837885	2.61704	0	0	1.04561	0	0	0	0	0	4.50109	1.32366	0	0	1.26185
GCFC2	619.396	526.758	479.869	473.394	492.475	688.414	629.353	574.271	599.615	573.572	731.076	714.716	586.217	670.459	790.771	643.048	475.292	641.451	574.926	669.523	426.58	658.96	636.678	527.682	527.195	522.404
WDR54	324.765	383.617	424.533	333.434	234.909	327.527	403.685	253.304	247.646	333.429	345.061	361.128	290.491	388.059	362.629	314.727	223.481	283.781	336.913	325.426	233.238	270.065	299.146	245.433	321.661	302.843
CROT	330.624	229.025	306.943	313.675	222.985	308.321	460.327	291.473	275.92	374.992	326.762	484.297	283.513	327.545	334.025	299.043	336.796	224.883	338	291.638	269.042	343.883	288.557	232.046	400.791	266.249
ABCB4	112.998	101.425	114.996	141.607	156.209	139.502	85.4123	188.243	202.796	55.4176	234.397	57.814	61.9366	104.699	262.053	243.626	13.6397	111.371	98.9003	198.279	75.7001	158.438	337.532	75.8612	35.9684	27.7606
KMT2E	6696.18	5335.47	5600.2	5572.06	7278.61	6354.44	7634.96	6499.15	6764.43	7425.96	7138.23	6432.44	6897.64	6707.47	6825.36	8223.69	6358.21	6883.56	7283.84	6909.52	6814.04	7539.33	7947.23	6198.31	6918.27	7178.64
RHBDD2	954.205	1263.73	1259.76	1079.34	2251.31	1685.15	1514.04	1390.57	1195.33	1770.59	1282.65	1306.26	1343.41	1158.41	1245.67	1538.09	1526.6	1569.9	1772.6	1267.92	1575.38	1567.28	1540.73	1355.46	1392.49	1688.35
SOX8	117.183	89.1562	44.9607	67.5101	39.3503	158.709	106.091	57.2536	57.524	157.016	43.5683	84.6263	94.2134	55.7115	98.7311	163.114	32.5255	170.268	51.0804	75.577	45.0109	89.1216	101.921	46.8554	50.3558	40.3791
IBTK	1986.25	1866.56	1930.72	2104.34	1850.65	1830.72	1884.46	1803.49	1915.84	1744.73	2024.18	2082.14	2064.84	2778.85	2198.84	1771.26	1997.69	1770.15	2053	1997.01	1928.31	2035.39	1943.13	2159.81	2542.46	2297.82
ZNF195	707.284	502.22	597.459	670.985	783.428	734.915	739.94	746.899	887.235	776.77	665.724	780.908	706.601	756.908	737.253	693.237	842.515	683.215	615.138	712.202	637.313	584.242	779.633	582.346	753.282	695.277
MYCBP2	6676.93	5342.01	6309.2	7963.73	5618.74	6117.89	7506.39	7628.61	8951.32	7050.96	8290.18	8105.7	8017.74	7706.44	7631.82	7564.96	6676.12	6856.78	5700.35	8588.22	6583.87	8048.85	9918.15	6485.02	8642.7	7428.48
FBXL3	1909.25	1536.92	1624.64	1647.41	2888.07	1928.77	2274.66	1754.04	1872.94	2746.86	2118.29	1695.04	2357.08	1890.35	1881.43	2488.54	1844.51	2034.65	2831.16	1926.77	2255.66	2251.45	3209.86	1815.09	2176.6	2619.59
ITGAL	19835.8	17003.5	17509.6	15732.3	21060.7	14164.5	18238.7	15618.1	12467.1	13953.2	15220.1	19762.3	14513.2	20371.2	15026.5	12923.7	18072.6	10461.3	20656	20932.2	21738.2	14453	9993.6	15392	16539.3	12393.8
PDK2	400.934	341.902	383.895	349.9	366.077	367.963	406.383	272.388	242.771	412.861	359.874	310.855	273.044	386.138	438.292	344.004	290.631	414.427	399.948	366.326	385.661	352.886	293.852	346.953	303.163	239.751
ITGA3	162.382	250.292	179.843	179.478	134.745	266.874	355.135	170.026	208.646	177.336	316.306	235.446	139.575	376.533	391.233	255.128	95.478	228.095	264.096	298.751	179.021	270.966	206.49	213.081	248.696	201.895
ZFX	2880.19	2554.45	2438.25	2690.53	3021.62	2563.61	2972.35	2889.57	3142.37	3007.33	3287.66	2790.99	2914.51	2921.01	2913.03	3218.37	2870.64	3023.07	2882.24	3010.63	3045.4	3036.44	3033.82	2389.63	2643.17	2888.36
LAMP2	3604.22	3608.78	4982.86	4247.38	4950.98	4086	3606.2	5726.23	4975.34	3956.82	4111.98	5514.12	5041.29	4297.47	4255.59	3666.94	7795.62	6201.41	5497.12	4830.7	6019.18	4851.28	2795.56	7309.45	5146.57	5960.96
GGNBP2	3176.5	2942.16	2698.51	2684.76	3969.61	3093.31	3450.66	3424.81	3556.74	3749.92	2868.54	2624.25	3769.41	2862.42	3058.82	3513.24	3397.34	2847.44	3139.81	2713.66	3621.33	3540.56	4341.59	3245.3	3066.57	4441.7
ITGA2B	402.608	565.201	1369.57	1001.95	3093.17	1332.35	1487.97	4420.67	2332.16	1802.92	4761.14	1810.67	788.601	727.131	1468.97	824.983	2331.34	1172.6	2279.05	2175.73	5192.62	879.513	202.519	536.606	1067.75	372.244
ASB4	0	0	0	0	0	0	0	0	0	0	0	0	0	1.92109	0	0	0	0	0	0	0	0	0	0	0	0
GDE1	1070.55	1148.4	1379.08	1108.15	1818.46	1472.86	1321.64	1630.86	1323.05	1363.27	1293.11	1508.19	1450.71	1379.34	1322.26	1051.88	2049.1	1581.68	1670.44	1257.25	2093.01	1401.64	864.347	1743.69	1328.78	1577.31
C19orf60	1025.35	1127.95	753.092	680.865	1507.23	1551.71	1409.75	1152.01	1044.21	1482.42	1269.58	1038.98	1230.01	1278.48	1290.89	1202.45	1011.44	1496.01	1170.5	1140.77	1106.86	1153.18	725.363	959.421	792.334	898.434
CRLF1	2.51107	4.90768	7.78166	4.93977	2.38486	2.02177	2.69723	2.60244	4.87492	5.54176	4.35683	1.67577	1.74469	6.7238	5.53632	2.09121	1.04921	5.35435	2.17363	1.77828	0	0.900218	7.94193	10.0405	10.2767	13.8803
OSBPL7	1453.07	1473.94	1671.33	1348.56	1843.5	1472.86	1879.97	1449.56	1437.13	1583.1	1463.02	1478.87	1291.07	1855.77	1526.18	1554.82	1661.95	1335.38	1823.68	1507.98	1275.65	1477.26	919.941	961.652	1015.34	1658.06
TMEM98	0.837022	2.45384	6.91703	4.11647	1.19243	0	1.79815	0	0.974983	1.84725	0	0	0	2.88163	0	0	1.04921	1.07087	1.08682	9.78055	1.02297	0	6.61828	0	1.02767	1.26185
YBX2	1.67404	9.81537	5.18777	0.823294	1.19243	4.04355	3.59631	2.60244	4.87492	4.61813	1.74273	4.18942	13.9575	0.960543	5.53632	9.41045	1.04921	8.56696	0	3.55657	1.02297	3.60087	0	3.34682	0	3.78554
KRT33A	0	0	0	0	0	0	0	0	0	0	0	0	0	0	0	0	0	0	0	0	0	0	0	0	0	0
MAP3K14	1680.74	1815.02	1719.75	1752.79	2084.37	2095.57	2034.61	1780.07	1743.27	1993.19	2140.95	1545.06	1838.03	1626.2	2107.49	1981.42	1191.9	2173.87	1867.15	1965	1828.06	1974.18	1810.76	1628.78	1750.12	1261.85
ABCC8	0	0	0	0.823294	0	0	0.899076	0	0	1.84725	0	0	0	0	0	0	0	0	2.17363	0.889141	0	0	0	0	1.02767	0
CCL18	1.67404	1.63589	1.72926	0	2.38486	3.03266	1.79815	0	0	0.923626	3.48546	0	1.74469	0	0	2.09121	3.14763	0	2.17363	0	0	0	0	0	0	0
CCL3	157.36	62.9819	73.4935	91.3857	81.0854	39.4246	26.9723	109.302	63.3739	37.8687	27.0123	132.386	36.6386	113.344	33.2179	98.2869	110.167	23.5591	47.8199	97.8055	43.9879	33.3081	172.075	502.023	50.3558	97.1621
SYNRG	5039.71	4198.52	4915.42	4454.02	3219.57	4495.41	4473.8	4490.07	4470.3	4148.01	4893.59	4067.09	3763.3	5293.55	5404.37	4596.48	4239.85	3814.44	3664.74	5066.33	3207.03	4477.69	4143.04	3350.16	4469.34	3505.41
CACNG3	0	0	0	0	1.19243	0	0	0	0	0	0	0	0	0	0	0	0	0	0	0	0	0	1.32366	0	1.02767	0
TMEM132A	17.5775	12.2692	4.32315	9.87953	50.0822	26.2831	17.9815	15.6146	19.4997	30.4797	22.6555	9.21673	45.362	8.64489	23.9907	12.5473	14.6889	33.197	26.0836	23.1177	15.3446	33.3081	9.26559	17.8497	10.2767	5.04738
AP2B1	5584.61	5616.02	6537.46	5695.55	4146.09	4740.05	6096.64	5296.82	4838.84	4370.6	5794.58	6211.24	4983.72	6040.85	6074.27	5523.93	5611.17	4822.13	5964.45	6257.78	5114.87	5628.16	5998.81	5538.98	7068.31	5505.43
TAC1	0	0	0	0	0	0	0	0	0	0	0	0	0	0	0	0	0	0	0	0	0	0	0	0	0	0
ZNF263	1378.58	1392.15	1411.07	1239.06	1528.7	1658.87	1410.65	1246.57	1177.78	1592.33	1315.76	1329.72	1370.46	1290.97	1423.76	1470.12	1138.39	1478.87	1303.09	1321.26	1432.16	1408.84	1444.11	1200.39	1080.08	961.526
CX3CL1	3.34809	2.45384	0.864629	0.823294	0	1.01089	0.899076	2.60244	0	0	0	0	0	0	0	5.22803	2.09842	0	1.08682	2.66742	0	0	1.32366	0	0	5.04738
SPATA20	357.408	903.832	845.607	327.671	1801.77	960.343	407.282	903.045	762.437	915.314	373.816	299.125	289.619	852.001	895.961	276.04	1456.3	935.941	1066.17	318.313	291.548	863.309	262.084	818.855	266.167	866.888
CACNA1G	0	0	0	0	2.38486	0	0	0	0	0	0	0	0	0	1.84544	0	0	0	2.17363	0	0	0	0	0	0	0
TNFRSF12A	11.7183	31.082	20.7511	8.23294	93.0097	30.3266	206.788	52.0487	47.7742	279.859	49.6679	32.6775	334.981	31.6979	21.2226	50.1891	72.3954	118.867	78.2508	27.5634	265.973	58.5142	41.0333	109.329	142.846	94.6384
DLX6	0	0	0	0	0	0	0	0	0	0.923626	0	0	0	0	0	0	0	0	0	0	0	0	0	0	0	0
MAP3K9	377.497	245.384	342.393	328.494	428.083	421.54	446.841	491.86	501.141	358.367	566.388	273.15	312.3	396.704	524.105	445.428	137.446	279.497	338	383.22	202.549	394.296	578.437	234.277	294.941	213.252
RALA	770.897	858.027	900.079	875.985	673.724	943.158	909.865	834.514	793.636	708.421	889.665	1079.2	794.708	937.49	1147.86	1085.34	967.371	883.468	825.98	1053.63	823.495	898.418	988.771	973.924	970.12	618.304
BAIAP2L1	51.0584	40.0794	45.8253	56.8073	85.8551	126.361	71.027	130.989	132.598	93.2863	90.6221	71.2202	128.235	91.2516	85.813	95.1501	92.3304	84.5988	76.0771	129.815	195.388	67.5164	56.9172	76.9768	76.0476	35.3317
KDM7A	3113.72	3167.91	2752.11	3552.52	4344.03	3780.72	4509.77	4494.41	5439.43	5297.92	4723.67	4041.12	5965.98	4043.89	4173.46	5113.01	4171.65	4923.86	4144.03	4427.92	4622.82	5403.11	4242.32	4050.76	4240.17	4194.37
ETV1	0.837022	5.72563	2.59389	4.93977	3.5773	7.07621	5.39446	3.46991	4.87492	7.38901	16.556	3.35154	0.872347	5.76326	0.92272	4.18242	5.24604	1.07087	10.8682	3.55657	2.04595	3.60087	2.64731	0	15.415	5.04738
AGK	1136.68	948.001	931.206	968.194	665.377	871.385	904.471	812.827	916.484	859.896	928.005	976.974	885.432	1240.06	896.884	1061.29	1631.52	693.924	841.196	987.836	695.623	945.229	962.298	846.745	674.151	971.621
ALDH3B1	1384.43	1317.71	1950.6	1515.69	2759.29	2294.71	908.966	2307.49	1833.94	1452.86	826.926	1604.55	1851.99	992.241	1374.85	723.559	3141.33	2256.32	2206.24	1906.32	3193.73	1602.39	379.889	2606.05	1656.6	1716.11
TTC22	278.728	265.833	367.467	276.627	357.73	322.473	348.842	402.51	308.095	321.422	341.575	467.54	159.639	464.903	352.479	296.952	585.459	279.497	283.659	409.894	224.031	243.959	137.66	159.532	178.815	199.372
PHTF2	1267.25	1085.42	1054.85	1036.53	1284.25	1334.37	1350.41	1491.2	1457.6	1333.72	1695.68	1921.27	1456.82	1495.57	1611.07	1655.19	1262.2	1091.22	1843.24	1998.79	1941.61	1480.86	1626.77	1307.49	1888.86	988.025
CCL26	0	0	0	0	2.38486	0	0	0	0	0	0	0	0	0	0	0	4.19684	0	0	0	0	0	0	0	0	0
FARP2	153.175	216.756	206.646	236.286	432.853	310.342	393.795	353.064	437.767	412.861	464.438	337.668	360.279	377.493	424.451	533.259	241.318	248.442	426.032	442.792	449.086	328.58	403.715	186.306	283.637	292.748
USH1C	0	0	0	0	0	0	0	0	0	0	0	0	0	0	0	0	0	0	0	0	0	0	0	0	0	0
GGCT	394.237	328.815	313.86	358.133	299.3	272.939	265.228	242.894	210.596	251.226	311.949	297.449	352.428	320.821	302.652	267.675	303.221	283.781	261.923	261.408	288.479	246.66	410.333	470.786	347.352	320.509
DBF4	585.079	386.071	391.677	398.475	1502.46	519.596	799.279	450.221	479.692	844.194	696.221	560.545	757.197	743.46	649.595	902.358	518.309	550.427	841.196	531.706	670.048	785.89	1471.9	570.075	778.974	770.988
TBXA2R	104.628	91.6101	84.7337	67.5101	129.975	142.535	130.366	202.123	129.673	148.704	282.323	248.014	129.98	122.949	207.612	142.202	155.283	173.481	191.28	144.93	185.158	194.447	68.8301	62.4739	33.9131	49.212
IFRD1	1094.83	919.373	1152.55	906.447	2533.92	1466.8	1535.62	1420.93	1149.51	2317.38	2054.68	1532.49	1477.76	1333.23	1783.62	3115.9	2119.4	1673.77	1404.17	1239.46	2126.76	1993.98	3720.8	1826.25	1292.81	1480.14
LGALS14	0.837022	3.27179	4.32315	0.823294	2.38486	8.0871	0.899076	1.73496	0.974983	4.61813	0.871366	0	5.23408	0.960543	0	2.09121	1.04921	0	0	0	0	0.900218	0	0	0	0
COX10	460.362	449.871	430.585	388.595	510.361	575.195	531.354	501.403	460.192	489.522	555.931	587.357	526.897	533.101	572.087	623.181	549.785	517.23	507.543	505.921	463.408	607.647	497.694	458.514	578.578	484.549
GTF2IRD1	9.20724	22.9025	10.3755	18.1125	9.53946	14.1524	16.1834	12.1447	12.6748	10.1599	21.7841	10.0546	11.3405	8.64489	15.6862	11.5017	4.19684	13.9213	8.69453	20.4502	12.2757	22.5055	19.8548	7.80924	54.4665	10.0948
PAF1	1142.54	1191.75	1364.38	1100.74	1173.35	1127.14	1031.24	985.456	824.836	843.271	1134.52	1069.98	868.857	1071.01	1132.18	1296.55	946.386	1125.48	1084.64	1157.66	912.494	1149.58	1388.51	1307.49	1074.94	1063.74
VPS41	1229.59	1318.53	1660.95	1453.94	1168.58	1162.52	783.995	1380.16	1384.48	816.486	1142.36	1371.62	1140.16	1278.48	1305.65	852.169	2010.28	1241.14	1377	1348.83	1235.75	1139.68	808.753	1233.86	1484.98	1131.88
ARHGAP44	30.9698	35.1717	33.7205	29.6386	29.8108	16.1742	59.339	13.8797	17.5497	27.7088	44.4397	38.5427	26.1704	57.6326	41.5224	32.4138	28.3286	24.63	45.6463	24.896	27.6203	16.2039	29.1204	30.1214	36.9961	32.808
ELAC2	1614.62	1667.79	1649.71	1515.69	1486.96	1836.78	1559.9	1580.55	1524.87	1598.8	1650.37	1621.31	1627.8	1946.06	1996.77	1832.95	1713.36	1530.27	1667.18	1864.53	1429.1	1709.51	1321.01	1356.58	1431.54	1396.86
SCIN	2.51107	7.36152	6.91703	13.996	13.1168	1.01089	3.59631	10.4097	10.7248	5.54176	4.35683	4.18942	8.72347	23.053	6.45904	9.41045	10.4921	4.28348	19.5627	4.44571	2.04595	27.0065	6.61828	13.3873	8.22136	15.1421
ARSD	457.851	550.478	851.66	806.829	1149.5	894.635	574.51	1171.1	1021.78	807.249	469.666	799.342	733.643	567.681	620.068	355.506	1487.78	1111.56	962.919	598.392	1318.61	660.76	189.283	840.051	611.464	637.232
PNPLA4	205.07	228.207	181.572	195.944	152.631	219.362	96.2012	227.279	203.771	168.1	177.759	182.659	179.703	188.266	220.53	167.297	188.858	183.119	174.977	195.611	135.033	182.744	178.693	193	156.206	141.327
MYH13	0	0	0	0	0	0	0	0	0	0	0	0	0	0	0	0	0	0	0	0	0	0	0	0	0	0
ADIPOR2	1862.37	1619.54	2095.86	1858.18	1967.51	1839.81	1744.21	1872.02	1756.92	1526.75	1762.77	2194.42	1823.2	2092.06	1872.2	1615.46	2808.73	1973.61	2299.7	1660.92	2191.21	1939.07	1641.33	2166.51	1866.25	2112.33
CDKL3	41.8511	31.082	23.345	35.4017	39.3503	37.4028	44.0547	36.4341	55.574	48.9522	36.5974	36.8669	58.4472	53.7904	22.1453	42.8698	38.8207	35.3387	28.2572	39.1222	48.0798	36.9089	31.7677	32.3526	33.9131	41.6409
UPP2	0.837022	1.63589	0	0.823294	3.5773	0	0	0.867479	0	0	3.48546	0.837885	0.872347	0	0	0	0	0	0	0	0	0.900218	0	0	0	0
PRSS21	6.69618	64.6178	30.262	41.1647	189.597	22.2395	35.064	72.8682	76.0487	31.4033	93.2362	94.681	129.98	67.238	37.8315	27.1857	68.1986	53.5435	49.9935	51.5702	21.4825	63.0153	29.1204	74.7456	10.2767	22.7132
MARK4	694.728	704.252	932.935	710.503	1433.3	1060.42	1078.89	1286.47	1013.01	1017.84	1139.75	1354.02	1194.24	1358.21	1307.49	999.599	1647.26	1354.65	1380.26	1222.57	1419.89	1104.57	499.018	1018.55	736.839	820.2
PROM1	2.51107	7.36152	9.51092	31.2852	19.0789	16.1742	9.88984	4.33739	7.79987	0.923626	13.0705	1.67577	3.48939	23.053	4.6136	10.4561	6.29525	11.7796	6.5209	9.78055	18.4135	12.6031	2.64731	10.0405	5.13835	1.26185
CCDC124	684.684	670.717	679.598	573.013	880.015	645.957	709.371	589.885	533.316	638.226	621.284	766.664	653.388	709.841	717.876	578.22	709.265	712.129	733.601	674.858	699.715	672.463	416.951	718.45	606.325	634.708
CEACAM21	522.302	453.143	697.756	596.888	382.771	763.22	812.765	757.309	731.237	955.03	942.818	699.634	723.175	830.87	770.471	740.289	646.313	867.405	659.697	697.976	431.695	729.177	541.375	417.237	439.843	440.384
PAFAH1B1	4009.34	3836.17	4609.34	4459.79	3586.84	3724.11	4618.56	4176.04	4897.34	3534.72	4445.71	4595.8	4124.45	4641.34	4306.34	4044.4	4938.63	4129.28	4301.62	4608.42	3846.39	3755.71	3941.85	3536.47	4482.7	4083.33
NOS2	0.837022	5.72563	2.59389	1.64659	13.1168	5.05443	0	5.20487	0	11.0835	7.84229	1.67577	3.48939	3.84217	1.84544	2.09121	4.19684	2.14174	0	0.889141	1.02297	1.80044	2.64731	1.11561	0	2.52369
DNAH9	3.34809	0.817947	1.72926	3.29318	1.19243	5.05443	2.69723	6.07235	5.8499	7.38901	5.2282	7.54096	10.4682	5.76326	0.92272	9.41045	2.09842	2.14174	3.26045	3.55657	5.11487	4.50109	1.32366	0	2.05534	0
KIAA0100	4201.85	3795.27	4560.92	4818.74	4749.46	4070.84	3914.58	4347.8	4484.92	3740.69	3431.44	4619.26	4394.88	4103.44	3926.17	3792.41	4750.82	4399.14	3835.37	4249.21	5030.99	4503.79	3928.61	4723.47	4542.3	4477.03
SLC13A2	0	0.817947	0	0	0	0	0	0.867479	0	0	0	0	0	0	0	0	0	1.07087	0	0	0	0	0	0	0	0
GAS7	3577.43	4236.97	6930.87	4859.08	9998.54	6169.44	3808.49	7300.7	6685.46	5591.63	3789.57	4183.56	6117.77	3513.67	4722.48	2429.99	10099.7	6763.62	6995.84	4968.52	9648.7	5178.05	1273.36	7524.76	4842.38	6779.9
TRAPPC6A	571.686	659.265	503.214	529.378	566.405	642.924	579.904	495.33	433.867	684.407	579.458	515.299	468.45	434.165	579.468	538.487	397.65	530.081	505.369	453.462	474.66	478.916	514.902	515.41	487.116	427.766
MATK	2142.78	1860.01	2215.18	1515.69	3112.25	1548.68	1643.51	1545.85	1009.11	1474.11	1535.35	1707.61	881.942	1996.97	1158.94	923.27	3220.02	1184.38	2295.36	1785.4	1569.24	1044.25	493.723	648.167	296.997	1327.46
CEACAM7	0	0	0	0	0	0	0	0	0	0	0	0	0.872347	0	0	0	0	0	0	0.889141	0	0	0	0	0	0
CD79B	2405.6	2230.54	2312.02	2200.67	1203.16	1599.22	1335.13	1631.73	1575.57	718.581	2702.98	1275.26	634.196	1627.16	4312.79	2672.57	559.228	1168.32	1725.86	2341.11	1573.34	1841.85	3736.68	1598.66	1468.54	652.374
SCN4A	24.2736	11.4513	18.1572	14.8193	17.8865	19.2069	6.29353	25.1569	28.2745	16.6253	31.3692	19.2713	6.97877	16.3292	31.3725	29.277	6.29525	20.3465	17.3891	24.896	16.3676	33.3081	51.6226	10.0405	5.13835	7.57107
ST7L	261.988	203.669	197.135	213.233	283.799	293.157	300.292	275.858	307.12	280.782	265.767	265.609	270.427	246.86	219.607	287.542	252.859	210.961	305.395	253.405	214.825	279.968	342.827	297.867	239.447	189.277
TKTL1	217.626	116.966	220.48	169.599	2089.14	148.6	182.512	112.772	76.0487	118.224	94.9789	121.493	64.5536	80.6856	167.935	169.388	214.039	72.8192	180.411	107.586	372.363	119.729	145.602	76.9768	109.961	117.352
PAX6	122.205	108.787	89.0568	93.8556	77.5081	83.9036	144.751	108.435	121.873	86.8209	128.091	90.4915	97.7028	120.068	125.49	89.9221	91.2812	82.457	85.8585	94.249	98.2056	89.1216	79.4193	85.9016	94.5456	93.3766
RPUSD1	601.819	678.896	638.961	559.017	1097.04	850.156	748.032	772.923	699.063	776.77	686.636	799.342	686.537	773.237	857.207	574.038	903.369	799.94	833.588	743.322	791.782	754.383	394.449	705.063	560.08	683.92
RHBDF1	7.5332	6.54358	3.45852	4.93977	4.76973	13.1415	11.688	12.1447	8.77485	6.46538	9.58503	8.37885	6.97877	5.76326	10.1499	15.6841	5.24604	12.8504	5.43408	10.6697	4.0919	12.6031	1.32366	7.80924	7.19369	1.26185
LUC7L	2481.77	2538.91	2105.37	2236.89	1868.54	2366.49	2295.34	2127.06	2340.93	2656.35	2130.49	1958.14	1972.38	2078.61	2228.37	2442.53	1889.63	1981.11	2074.73	2255.75	1785.09	2101.11	2202.56	1954.54	1560	1694.66
CACNA2D2	708.121	750.875	991.73	722.853	1051.73	684.37	871.205	1071.34	916.484	864.514	519.334	581.492	445.769	1089.26	516.723	485.161	461.652	791.373	1135.72	1058.97	577.981	465.413	283.262	267.745	319.605	834.08
BAIAP3	457.851	1119.77	806.699	561.487	1095.85	554.977	403.685	415.522	506.991	641.92	694.479	385.427	357.662	422.639	555.478	364.916	501.522	1141.55	860.758	547.711	524.786	391.595	227.669	316.832	277.471	599.377
TSR3	449.481	545.571	549.039	447.049	962.293	780.405	798.38	690.513	586.94	766.61	672.695	815.262	726.665	757.868	815.685	766.429	717.659	812.791	933.575	750.435	783.599	671.563	451.367	528.797	495.337	547.641
PIGQ	733.231	901.378	901.808	711.326	1048.15	1144.32	1069	1103.43	915.509	1068.64	969.83	941.782	969.177	1009.53	1128.49	1160.62	1017.73	1195.09	1215.06	1032.29	1226.55	1060.46	677.712	815.508	646.404	733.132
CRAMP1L	699.751	585.65	591.406	643.816	758.387	720.762	714.766	774.658	756.587	698.262	757.217	698.796	674.324	668.538	805.535	847.986	1528.7	600.758	746.643	759.327	645.497	747.181	656.533	460.745	548.776	605.686
TEAD3	5.02213	2.45384	1.72926	1.64659	5.96216	0	1.79815	1.73496	7.79987	5.54176	6.97093	3.35154	0.872347	4.80271	2.76816	6.27363	2.09842	4.28348	1.08682	3.55657	4.0919	5.40131	3.97097	0	2.05534	3.78554
SELE	0.837022	0	3.45852	4.93977	1.19243	1.01089	6.29353	1.73496	0.974983	1.84725	4.35683	3.35154	4.36173	10.566	4.6136	1.04561	1.04921	2.14174	0	1.77828	4.0919	1.80044	3.97097	2.23121	6.16602	1.26185
DNAJC11	860.459	876.021	901.808	839.76	660.607	799.612	742.637	737.357	738.062	708.421	709.292	756.61	702.239	822.225	800.921	728.787	736.545	706.774	634.701	749.546	616.854	726.476	692.272	799.889	707.037	644.803
FMO3	0	0	0.864629	0.823294	0	0	0	0	0	0	0	0	0	0	0	0	0	0	0	0	0	0.900218	0	0	0	0
MYLIP	3133.81	2619.07	2531.63	1964.38	6719.36	3334.92	4960.2	4490.94	3403.67	5594.4	3780.86	2847.13	4846.76	3846.97	3961.24	4571.39	4201.03	4735.39	4280.97	3040.86	3937.43	5095.23	4671.18	4835.04	3576.29	5384.29
NOX1	1.67404	4.90768	3.45852	1.64659	0	4.04355	2.69723	3.46991	3.89993	2.77088	6.97093	0.837885	0.872347	0.960543	0	3.13682	2.09842	1.07087	0	1.77828	1.02297	1.80044	6.61828	3.34682	2.05534	1.26185
E2F2	282.913	256.835	231.721	220.643	205.098	443.779	670.711	270.653	182.322	273.393	508.006	808.559	396.045	1211.24	734.485	728.787	593.852	278.426	678.173	601.949	577.981	640.955	279.291	535.491	636.128	348.269
PSMB1	2311.02	2323.79	2293	2234.42	2344.32	2024.81	2232.41	1904.12	1743.27	1888.82	1950.12	2183.53	2188.72	2253.43	2125.02	2037.89	2230.62	2080.7	2472.51	1941.88	2483.78	2181.23	2702.9	3084.65	2949.41	3032.21
SYN1	5.02213	6.54358	7.78166	2.46988	41.7351	17.1851	19.7797	6.07235	8.77485	23.0907	19.1701	23.4608	12.2129	7.68434	26.7589	28.2314	12.5905	22.4883	56.5144	10.6697	36.8271	28.807	17.2075	16.7341	23.6364	18.9277
JARID2	1940.22	1699.69	2497.05	2035.18	4813.85	2714.23	2613.61	2988.46	3210.62	3116.32	2870.28	2347.75	3003.49	2719.3	2943.48	3021.8	4071.98	3257.59	3374.56	2653.2	3760.46	3258.79	2350.81	2612.75	2391.39	3557.14
CDKL5	75.332	62.164	88.1922	66.6869	63.1989	48.5226	81.8159	101.495	84.8235	91.439	82.7798	75.4096	126.49	85.4883	54.4405	80.5116	111.216	106.016	92.3794	83.5793	130.941	105.326	66.1828	78.0924	85.2966	102.209
CAMK1G	0	0.817947	0	0.823294	2.38486	0	0	0	0	0.923626	0.871366	0	0	0.960543	0	1.04561	0	2.14174	0	1.77828	2.04595	3.60087	1.32366	1.11561	0	0
CDK11A	65.2877	67.8896	54.4716	121.024	137.13	109.176	124.972	86.7479	107.248	155.169	121.991	113.114	138.703	57.6326	88.5811	127.564	67.1494	113.512	97.8134	104.919	130.941	68.4166	157.515	126.063	97.6286	170.349
NADK	4771.86	4618.13	6756.21	5483.96	5848.88	7881.89	4224.76	8397.19	6302.29	4484.21	5004.25	7856.84	6320.15	5491.42	5876.81	5062.82	12868.5	6944.59	7432.74	6906.85	8115.26	7149.53	3703.59	8705.07	4760.17	4864.41
TFAP2B	0	0	0	0	0	0	0	0	0	0	0	0	0	0	0	0	0	0	0	0	0	0	0	0	0	0
TFAP2D	0	0	0.864629	0	0	0	0	0	0	0	0.871366	1.67577	0.872347	0	0	0	0	1.07087	2.17363	0	0	0	0	0	0	0
DLEC1	213.441	318.999	287.057	292.27	243.256	354.821	392.896	299.28	288.595	345.436	270.123	278.178	264.321	209.398	202.998	268.721	214.039	367.309	251.055	285.414	259.836	261.063	255.466	182.959	316.522	232.18
CYTH3	345.69	517.761	464.306	317.792	950.369	528.694	284.108	522.222	565.49	448.882	321.534	290.746	377.726	300.65	428.142	332.503	491.03	602.9	437.987	392.111	697.669	476.215	232.963	291.173	348.38	435.337
ADAM22	163.219	143.959	188.489	122.671	90.6249	147.589	147.449	131.857	181.347	165.329	169.916	139.089	120.384	170.977	104.267	124.427	87.0843	136.001	102.161	118.256	100.252	82.8201	111.187	79.208	84.2689	129.97
SYPL1	1326.68	1355.34	1473.33	1401.25	1383.22	1197.9	1067.2	1349.8	1240.18	1118.51	1510.08	962.729	1272.75	852.001	1659.05	1368.7	1244.36	1455.31	1513.93	1176.33	1305.32	1313.42	1826.64	1565.19	1505.54	1300.96
CYB561	431.903	944.729	950.227	684.158	754.81	826.906	1228.14	640.199	542.091	686.254	703.192	836.209	630.707	833.751	850.748	803.025	662.051	1139.41	891.189	1085.64	911.471	693.168	641.973	525.45	971.148	709.157
SPAG9	1645.59	1549.19	1861.55	1909.22	2275.16	2002.57	2028.32	2446.29	2333.13	2157.59	2052.94	2246.37	2468.74	2066.13	2137.02	1903	2530.69	2023.95	2064.95	2097.48	2519.59	2095.71	1637.36	2002.51	1955.66	2175.42
CELSR3	375.823	372.166	237.773	174.538	238.486	218.352	264.328	278.461	240.821	296.484	353.775	335.992	413.492	324.663	323.875	520.712	174.169	224.883	266.27	234.733	175.952	198.948	465.927	285.595	234.309	282.653
AASS	68.6358	118.602	121.048	167.129	119.243	81.8818	61.1372	155.279	202.796	182.878	165.56	86.3021	148.299	124.871	78.4312	147.43	54.5589	121.008	90.2057	135.149	78.7691	133.232	121.776	94.8265	58.5772	105.995
PLEKHG6	7.5332	9.81537	12.9694	17.2892	39.3503	28.3048	31.4677	33.8317	26.3245	41.5632	66.2238	73.7338	59.3196	23.053	35.9861	28.2314	46.1652	72.8192	22.8231	24.896	52.1717	35.1085	7.94193	31.237	9.24903	16.404
SS18L2	405.956	449.053	376.978	378.715	497.244	391.213	419.869	315.762	291.52	383.305	418.256	399.671	375.109	376.533	405.074	415.105	388.207	471.183	387.993	337.874	396.914	353.786	546.67	536.606	562.135	436.599
MPND	216.789	221.664	214.428	213.233	166.941	163.764	97.1002	153.544	149.172	146.857	123.734	166.739	147.427	106.62	137.485	122.336	216.137	132.788	155.415	149.376	212.779	153.037	201.196	265.514	232.253	215.776
MGST1	171.59	335.358	462.577	327.671	733.346	429.627	218.476	444.149	390.968	279.859	163.817	499.379	305.321	231.491	295.27	149.522	564.474	623.247	290.18	158.267	403.052	314.176	58.2408	713.988	421.345	556.474
CRY1	832.837	673.988	652.795	663.575	835.895	604.51	544.84	531.764	457.267	753.679	548.961	556.355	535.621	527.338	577.623	610.634	555.031	572.916	703.17	567.272	574.912	531.129	647.268	510.947	555.969	647.327
PGLYRP1	10.0443	19.6307	14.6987	27.992	3.5773	26.2831	44.0547	24.2894	13.6498	63.7302	133.319	23.4608	34.8939	35.5401	71.9722	100.378	272.794	386.584	17.3891	79.1336	23.5284	29.7072	52.9462	32.3526	5.13835	6.30923
NFIX	215.952	212.666	204.917	291.446	484.128	389.191	543.042	506.608	450.442	366.68	257.053	268.961	601.047	289.123	415.224	799.888	624.279	371.592	621.659	389.444	764.162	561.736	329.59	371.497	314.467	253.631
ST3GAL1	6374.76	5634.84	5567.35	5612.4	5538.85	6472.71	6343.88	5812.11	5408.23	6914.27	6265.12	4969.49	5620.53	5256.09	6444.28	6630.19	5360.41	6972.44	5478.64	5471.78	6151.15	6340.24	5957.77	4752.48	6103.33	6278.94
MMP25	294.632	634.727	711.59	565.603	1052.92	1219.13	219.375	1367.15	993.508	2185.3	1933.56	1936.35	1381.8	1918.2	1507.72	1609.19	2271.54	2449.08	468.418	732.652	1283.83	1124.37	945.09	1123.41	357.629	493.382
IL32	7272.89	7195.48	5799.07	4331.35	4822.2	5218.2	5532.02	3480.32	3222.32	5112.27	6560.51	5576.12	3239.02	5035.17	5468.04	4314.17	2673.38	4801.78	3715.82	5752.74	3859.68	5054.73	5134.46	4113.24	10580.9	5130.66
PKD1	3151.39	2999.41	2986.43	2834.6	3852.75	4152.72	4519.66	4219.42	4063.73	4809.32	4449.19	3361.59	4218.67	3654.87	3651.2	4267.12	2698.57	4669	3477.81	4053.59	3854.57	3980.76	2197.27	2078.37	2212.57	1918.01
MAPK8IP2	9.20724	12.2692	5.18777	9.87953	20.2713	43.4681	14.3852	32.0967	29.2495	35.0978	18.2987	27.6502	26.1704	19.2109	15.6862	30.3226	38.8207	31.0552	30.4309	22.2285	56.2636	30.6074	15.8839	14.5029	17.4704	18.9277
MED24	2131.06	2130.75	2205.67	2166.09	1785.07	2005.6	2229.71	1941.42	2097.19	2027.36	2161.86	2252.23	2015.12	2498.37	2370.47	2168.59	2273.64	1898.65	2219.28	2124.16	2016.28	2345.07	1772.37	2019.25	2055.34	1948.29
RHOBTB2	514.769	579.925	530.018	580.423	525.863	389.191	505.281	533.499	486.517	410.09	845.225	570.599	348.066	546.549	891.348	507.119	679.887	431.561	716.212	726.428	443.971	693.168	468.574	494.213	466.562	345.746
HEATR5B	2199.69	2333.6	2259.28	2422.13	2358.63	2263.38	2656.77	2483.59	2936.65	2273.04	2208.04	2108.12	2391.97	2337	2198.84	2813.72	2277.83	2463	2252.97	2160.61	2046.97	2340.57	2828.65	1741.46	2104.67	2338.2
SEC62	2118.5	1788.03	2387.24	2083.76	3430.63	2855.76	3181.83	3138.54	3006.85	2836.46	3159.57	2325.13	2758.36	3023.79	3709.34	3241.38	2949.33	3018.78	2873.54	3041.75	2436.73	3030.13	2709.52	1924.42	2367.75	2417.7
RPS20	26431.5	29247.3	21853.5	26173.4	18613.9	17504.5	19465.9	13007	12495.4	21241.6	19803.5	11495.8	17460	12564.9	15328.2	16114.9	9611.8	21483.8	13956.9	12435.5	13969.7	14298.2	33885.6	23172.2	23958.1	23378.2
CSDE1	16489.3	15986.8	16221.3	15014.4	19260.2	17315.5	17410.6	16157.7	14177.2	17918.4	17378.5	13133.8	17800.2	15513.7	16453	16539.4	14769.7	18278.7	17129.3	15320.8	17984.9	16732.4	19505.4	17598.7	18314.1	17522
UBE3C	2709.44	2673.87	2857.6	2831.31	3304.23	3068.04	3471.33	3109.04	3181.37	3066.44	3290.28	3224.18	3300.09	3294.66	3113.26	3004.03	3503.31	3574.57	3331.09	3122.66	3340.01	3212.88	2837.92	3216.29	3071.71	3154.61
REV3L	1268.93	1206.47	1408.48	1399.6	1502.46	1465.79	1810.74	1643	1883.67	1647.75	1627.71	1871	1789.18	1741.46	1798.38	1545.41	1473.09	1489.58	1422.64	1880.53	1796.34	1765.33	1802.82	1265.1	1832.34	1615.16
TENM1	489.658	472.773	288.786	568.073	609.333	393.235	794.783	458.896	748.787	1231.19	785.101	749.069	864.495	852.001	385.697	667.096	442.766	554.711	448.855	566.383	496.143	629.253	451.367	295.636	576.523	717.99
PAX7	0	0	0	0	0	0	0	0	0	0	0	0	0	0	0	0	0	0	0	0	0	0	0	0	0	0
MASP2	434.415	483.407	348.446	443.756	269.49	467.03	745.334	605.5	726.362	858.972	554.189	425.645	687.409	495.64	420.76	649.321	337.845	534.364	524.932	481.025	551.383	493.32	367.976	301.214	254.862	348.269
IYD	0.837022	1.63589	4.32315	0	0	1.01089	0	0	1.94997	1.84725	0	0	0.872347	0	0.92272	0	2.09842	2.14174	0	0	0	0	2.64731	2.23121	3.08301	1.26185
FAM76A	364.942	395.886	370.061	326.848	579.522	539.814	584.4	517.885	517.716	505.224	420.87	512.785	523.408	402.467	509.342	495.617	474.242	533.293	564.058	459.686	533.993	478.916	418.275	410.543	377.155	401.267
TRAF3IP3	10744	12593.1	10821.7	11032.1	5697.44	9613.53	7852.53	8491.75	8776.8	9297.22	8597.77	8726.57	8179.12	8954.18	8750.16	8491.36	6317.29	8814.33	6784.99	9584.05	6035.55	7035.2	7863.84	8157.31	6777.48	5764.11
POMT2	212.604	305.912	294.839	273.334	363.692	314.386	297.594	299.28	273.97	275.241	271.866	196.065	287.002	324.663	330.334	242.581	228.728	258.08	308.656	322.758	318.145	296.172	230.316	208.618	200.396	209.466
VTA1	964.25	824.491	1061.76	1079.34	686.841	958.321	673.408	877.888	835.561	544.016	726.719	1180.58	692.643	900.989	1038.98	673.37	1213.93	790.302	771.639	1034.07	581.05	828.201	731.981	997.352	898.184	677.611
MLXIPL	0	3.27179	2.59389	6.58636	3.5773	2.02177	0	4.33739	1.94997	1.84725	0	3.35154	2.61704	0	0	1.04561	7.34446	0	5.43408	4.44571	1.02297	1.80044	3.97097	2.23121	2.05534	5.04738
BAZ1B	3046.76	2785.11	3447.28	3211.67	2556.57	2990.2	3155.76	3184.51	2903.5	2628.64	3032.35	3382.54	2635.36	3752.84	3656.74	2916.19	3177	2775.7	2933.32	3476.54	2544.14	3079.65	3023.23	2830.29	3114.87	2564.07
RANBP9	1440.52	1207.29	1243.34	1242.35	2213.15	1667.96	2006.74	1623.92	1442	1820.47	1727.05	1834.13	1710.67	1915.32	1876.81	2001.29	1779.46	1655.57	1867.15	1665.36	1899.66	1984.98	2088.73	1773.81	1962.85	1615.16
ETV7	63.6137	48.2589	16.428	55.1607	67.9686	102.1	192.402	143.134	135.523	8.31264	81.9084	454.133	203.257	69.1591	143.944	118.153	578.114	38.5513	376.038	183.163	184.135	135.933	158.839	114.907	107.905	104.733
SPRTN	288.773	250.292	247.284	241.225	713.074	342.691	329.961	374.751	300.295	437.799	365.974	350.236	436.173	337.151	345.097	439.154	431.225	335.182	443.421	345.876	492.051	374.491	533.433	314.601	330.91	536.284
METTL13	653.714	693.619	1059.17	787.893	276.644	582.271	311.08	532.632	413.393	264.157	392.986	768.34	281.768	602.26	786.158	327.275	744.938	381.23	360.823	674.858	307.915	377.191	305.764	432.855	522.056	287.701
DYRK4	237.714	238.841	261.118	218.996	169.325	229.471	210.384	232.484	226.196	154.246	234.397	211.985	160.512	227.649	276.816	237.352	166.824	173.481	213.016	195.611	243.468	175.543	266.055	189.653	182.925	131.232
ZNF207	6839.31	6375.9	5995.34	6486.74	5542.43	5217.19	7374.22	6967.59	7476.17	7590.36	6250.31	7362.49	7820.59	7346.23	5467.12	6307.09	7304.59	6344.91	6423.08	6616.99	6476.45	5678.58	5674.51	5627.12	4957.48	6465.7
UQCRC1	2076.65	2202.73	2515.21	2275.59	2758.1	2399.85	1992.35	2220.75	1795.92	2037.52	1689.58	2463.38	2210.53	2239.03	2169.32	1727.34	2947.23	2363.41	2536.63	1961.45	2663.83	2021.89	1465.29	2916.19	2287.59	2535.05
STARD3NL	796.845	704.252	758.28	736.025	1073.19	956.299	787.591	885.696	684.438	689.949	745.018	1142.87	761.559	941.332	798.153	731.924	1295.77	840.633	1147.68	893.587	1225.52	839.904	721.392	1123.41	902.294	1123.04
CD9	225.159	223.3	1909.97	622.411	751.232	537.792	210.384	520.487	402.668	498.758	244.854	299.125	289.619	271.834	408.765	246.763	429.126	277.355	414.077	244.514	816.334	308.775	272.673	246.549	318.578	264.988
HHATL	0	0.817947	0.864629	0	0	1.01089	0	0.867479	0.974983	0.923626	0	0	3.48939	0.960543	4.6136	0	0	0	2.17363	0	0	0	0	1.11561	0	0
NCAPD2	2853.41	2524.18	3025.34	2908.7	1879.27	2011.66	2673.85	2395.98	2336.06	2228.71	2635.88	2603.31	2467	3408.01	2854.9	2234.46	2457.25	2312.01	1998.65	2598.07	2135.97	2542.22	2131.09	2346.12	2722.3	2174.16
IFFO1	2000.48	2792.47	2969.14	2368.62	3195.72	3559.33	2440.99	3064.8	2548.61	2263.81	2005.88	2739.88	2297.76	2442.66	2520.87	2294.06	3290.32	2956.67	2540.98	2407.79	2568.69	2333.37	1118.49	2459.91	1727.51	2017.69
GIPR	230.181	257.653	134.882	164.659	230.139	181.96	272.42	248.099	247.646	283.553	266.638	244.662	217.214	238.215	159.631	208.076	96.5272	168.127	223.884	223.174	122.757	159.339	133.689	145.029	163.4	186.753
PHF7	200.885	231.479	177.249	180.301	269.49	216.33	281.411	268.051	311.995	327.887	263.153	234.608	261.704	240.136	219.607	283.359	204.596	228.095	274.964	255.184	328.375	261.963	243.553	176.266	205.534	209.466
SEMA3G	25.9477	75.2511	44.0961	28.8153	48.8897	58.6314	92.6049	17.3496	37.0494	25.8615	104.564	158.36	50.5961	75.8829	95.0402	75.2836	30.4271	18.2048	57.6013	53.3485	68.5393	70.217	75.4484	56.8959	130.514	94.6384
NISCH	4843.01	5174.33	5550.05	5189.22	5621.13	5812.6	5370.18	5693.26	5318.53	5471.56	4746.33	4916.71	4856.35	4934.31	5159.85	5069.1	5772.75	5647.77	4760.25	4833.37	4775.25	5467.93	3679.76	4553.9	4172.34	5294.7
STAB1	2914.51	5072.09	8609.11	7177.48	7125.98	6754.75	3674.53	7799.5	7530.77	5164.92	2792.73	6436.63	5957.25	4288.82	4587.77	2873.32	8288.75	9984.8	6322.01	4101.61	11183.2	8588.98	819.343	6467.17	4462.14	9812.11
FUZ	231.855	261.743	226.533	253.575	200.329	229.471	261.631	208.195	222.296	306.644	265.767	237.121	204.129	211.319	238.062	237.352	199.35	253.796	266.27	186.72	272.111	207.95	195.901	223.121	147.984	200.633
SLC6A13	4.18511	7.36152	9.51092	3.29318	11.9243	7.07621	7.19261	2.60244	7.79987	3.69451	6.97093	1.67577	5.23408	3.84217	7.38176	3.13682	4.19684	8.56696	4.34726	12.448	6.13785	5.40131	5.29462	3.34682	7.19369	3.78554
IDS	6739.7	6972.18	7545.62	7156.9	9122.11	7908.17	9407.04	8111.79	6966.25	9142.05	8297.15	8878.23	6991.86	8345.2	7418.67	7481.31	9644.33	8581.96	9449.87	8501.08	9806.24	7921.92	6902.86	7539.26	7577.01	8241.11
PRSS3	1.67404	2.45384	3.45852	1.64659	3.5773	6.06532	0	2.60244	3.89993	0.923626	0.871366	0	1.74469	0	9.2272	0	3.14763	2.14174	0	2.66742	7.16082	0	1.32366	4.46242	1.02767	2.52369
ZNF200	248.596	228.207	342.393	344.96	163.363	256.765	163.632	177.833	202.796	184.725	210.871	307.504	197.15	231.491	214.071	215.395	262.302	254.867	171.717	258.74	118.665	225.955	329.59	217.543	162.372	131.232
CD4	9863.47	11542.9	14203.3	11592.8	11765.7	13734.9	8615.85	10382	9438.81	10845.2	7200.97	7468.9	14469.6	7738.13	9657.19	7520	8403.11	12410.3	11235.5	8753.6	13478.7	10221.1	6586.51	14353.4	11182.1	10224.7
LRRC23	112.161	117.784	121.048	145.723	96.587	159.72	149.247	126.652	110.173	120.071	107.178	120.655	83.7453	93.1727	124.567	118.153	71.3462	119.937	79.3376	128.925	129.918	83.7203	136.337	111.561	83.2413	82.02
BTK	2724.51	2589.62	2919.85	2802.49	2555.38	3076.13	1625.53	3700.66	3353.94	1686.54	2343.1	2434.89	2561.21	2564.65	3428.83	2396.53	3316.55	2615.07	3133.29	3195.57	4186.01	2741.16	2230.36	3749.55	2848.7	2504.76
HFE	174.938	302.64	352.769	269.217	232.524	281.027	172.623	274.991	304.195	169.947	142.904	284.881	319.279	143.121	219.607	152.658	205.645	356.6	206.495	176.05	247.56	175.543	92.6559	314.601	273.36	233.441
SCMH1	498.028	565.201	524.83	488.214	630.797	599.456	612.271	582.946	627.889	522.773	597.757	392.13	587.962	522.535	564.705	564.627	339.944	578.27	449.942	571.718	543.2	546.432	513.578	387.115	502.531	473.192
FYN	9274.21	9306.6	10065.1	9290.88	11496.2	10676	11797.7	9792.97	8897.7	9611.26	8419.14	9220.08	9273.04	10241.3	9141.39	7996.79	12758.4	9355.12	10763.8	9794.78	9139.26	9087.7	7874.43	8977.28	8843.1	11980
HIVEP2	3697.13	3567.89	2836.85	3648.02	2023.56	3630.09	5385.47	2654.48	2932.75	5138.13	5521.85	3235.07	4011.05	3842.17	4468.73	5596.08	1713.36	4767.52	2862.67	4252.76	2625.98	4832.37	5380.66	3140.43	5545.31	2675.11
FMO1	1.67404	4.08974	2.59389	0.823294	2.38486	2.02177	0	5.20487	1.94997	0	0.871366	0	0	5.76326	0.92272	4.18242	0	1.07087	1.08682	1.77828	3.06892	2.70065	11.9129	4.46242	0	0
TCEB3	1283.16	1235.1	1326.34	1143.56	2402.75	1401.09	1363	1527.63	1299.65	1261.67	1164.14	1383.35	1399.24	1463.87	1369.32	1218.13	1483.58	1403.91	1760.64	1261.69	1668.47	1480.86	1335.57	1739.23	1353.44	1851.13
LYPLA2	1367.69	1529.56	1875.38	1449.82	1820.84	1780.17	1550.01	1564.93	1370.83	1403.91	1463.89	1846.7	1431.52	1679.99	1722.72	1488.94	1848.71	1822.62	1735.65	1623.57	1646.99	1665.4	1155.55	1616.51	1442.85	1298.44
CLCN6	767.549	798.316	791.136	978.074	1345.06	1055.37	761.518	1148.54	1289.9	829.416	898.378	1034.79	997.092	868.331	917.184	936.863	893.926	996.98	874.887	1068.75	1216.32	1141.48	645.944	954.959	659.764	950.17
MRC2	97.0946	153.774	51.8777	180.301	101.357	208.243	175.32	38.1691	44.8492	145.009	142.904	139.089	116.022	91.2516	131.949	197.619	60.8541	160.631	96.7266	112.921	123.78	191.746	87.3613	119.37	140.791	45.4264
NME2	0	0	0	0	0	0	0	0	0	0	0	0	0	0	0	0	0	0	0	0	0	0	0	0	0	0
SLC6A7	0	0	0	0	1.19243	0	0	0.867479	0	0	0	0	1.74469	0	0.92272	0	0	1.07087	0	0.889141	1.02297	0	0	0	0	1.26185
TSPAN9	54.4064	74.4332	143.528	131.727	211.061	124.339	111.485	308.822	219.371	121.919	320.663	132.386	96.8305	101.818	71.9722	60.6451	228.728	104.945	264.096	151.154	662.888	72.0175	22.5021	81.4392	80.1583	82.02
BTBD7	1146.72	925.098	1092.03	1106.51	1145.93	1112.99	1175.09	1183.24	1331.83	1190.55	1192.03	1137.85	1272.75	1301.54	1175.55	1004.83	1273.74	1402.84	1243.32	1283.03	1386.13	1167.58	1140.99	1011.85	1242.45	1255.54
APBA3	734.068	772.142	711.59	651.226	709.497	954.277	1205.66	741.694	770.237	999.364	1056.1	1007.14	877.581	951.898	1086.96	1140.76	668.346	810.649	842.282	1010.06	764.162	1036.15	754.484	633.664	634.072	580.449
MKS1	285.425	307.548	294.839	270.864	122.821	307.31	216.677	196.05	194.997	208.74	202.157	218.688	199.767	219.964	238.062	234.216	208.793	200.253	178.238	209.837	130.941	215.152	178.693	182.959	223.004	152.683
ABHD5	331.461	298.551	491.109	422.35	783.428	505.443	352.438	738.224	756.587	507.994	522.82	380.4	589.706	377.493	478.892	360.734	1059.7	623.247	479.286	398.335	754.955	447.408	397.097	775.346	388.459	966.574
KAL1	0	1.63589	0.864629	0.823294	7.15459	2.02177	1.79815	3.46991	1.94997	1.84725	1.74273	0.837885	1.74469	1.92109	23.9907	4.18242	5.24604	4.28348	1.08682	1.77828	3.06892	15.3037	0	3.34682	8.22136	2.52369
AKAP8L	1869.91	2050.59	1829.56	1736.33	1674.17	1604.28	1422.34	1378.42	1379.6	1509.21	1389.83	1374.13	1297.18	1412	1593.54	1493.12	1442.66	1442.46	1499.81	1447.52	1404.54	1564.58	1559.27	1832.94	1571.31	1630.3
MBTD1	1386.11	1288.27	1347.96	1449.82	1368.91	1473.87	1419.64	1459.97	1700.37	1573.86	1474.35	1404.29	1447.22	1453.3	1446.83	1534.95	1421.68	1532.42	1561.75	1402.18	1509.91	1655.5	1456.02	1328.69	1380.16	1379.2
UTP18	878.873	962.724	906.131	939.379	1194.82	1050.31	1033.04	948.154	883.335	1034.46	1049.12	983.677	1009.3	925.963	1033.45	1120.89	897.074	987.343	984.655	952.27	895.103	1129.77	1224.38	888.022	849.883	861.84
RNF216	3910.57	3676.67	3263.11	3391.15	3774.05	3815.09	3800.4	3212.27	3348.09	4347.51	3715.5	2745.75	3843.56	3202.45	3699.19	4185.56	2790.9	3707.35	3316.96	3621.47	2919.57	3479.34	3747.27	2781.21	2701.74	3059.98
TTC19	1050.46	945.547	1034.96	922.913	1236.55	1204.98	1155.31	1095.63	1172.9	1377.13	1161.53	1069.14	1155.86	1339.96	1128.49	886.674	977.863	1295.75	1166.15	1048.3	1094.58	1127.97	1081.43	975.039	1126.33	1090.23
PTBP1	7385.05	7085.88	6481.26	5806.7	10742.6	7763.61	8358.71	7717.96	7436.2	7799.1	8805.15	7954.04	9287	9355.69	9172.76	8535.28	9504.78	8783.28	8952.1	8107.19	9168.92	8588.98	5763.2	7453.36	6941.91	6863.18
DPF1	2.51107	1.63589	0.864629	1.64659	5.96216	5.05443	10.7889	9.54227	6.82488	5.54176	7.84229	3.35154	8.72347	14.4081	4.6136	14.6385	2.09842	3.21261	5.43408	7.11313	8.1838	11.7028	10.5892	1.11561	5.13835	6.30923
SYT7	3.34809	0.817947	1.72926	0.823294	0	2.02177	0.899076	1.73496	0.974983	5.54176	0.871366	0	0.872347	0.960543	0.92272	1.04561	1.04921	2.14174	2.17363	0.889141	1.02297	0	0	1.11561	0	0
LARS2	369.964	361.533	470.358	350.723	320.764	268.896	330.86	287.135	335.394	265.081	381.658	365.318	314.045	410.152	366.32	346.095	408.142	248.442	347.781	414.34	321.214	279.968	381.213	305.676	368.934	403.791
PIK3C2A	1281.48	1038.79	1156.01	1267.05	1466.69	1415.24	1503.26	1725.42	1997.74	1466.72	1361.94	1700.07	1700.2	1872.1	1500.34	1391.7	2428.92	1316.1	1461.77	1741.83	1490.47	1708.61	1245.56	1168.04	1293.84	1432.19
PLAUR	1684.09	1271.09	1475.06	1073.58	15919	3083.21	4612.26	2576.41	2212.24	7810.18	6141.39	1666.55	6530.39	3111.2	3238.75	4642.49	3658.59	5470.01	5942.71	3632.14	9339.76	4808.07	4182.75	6258.55	6808.31	4667.57
ANLN	33.4809	18.8128	23.345	13.996	19.0789	25.2722	57.5409	19.952	17.5497	30.4797	60.9956	77.0854	70.6601	217.083	80.2767	92.0133	81.8383	33.197	47.8199	41.7896	22.5054	57.614	35.7387	37.9306	72.9646	44.1646
WIZ	1211.17	1238.37	1353.14	1167.43	1647.94	1740.75	1567.09	1595.29	1598.97	1622.81	1573.69	1711.8	1636.52	1726.1	1800.23	1691.79	1844.51	1698.4	1712.82	1745.38	1599.93	1735.62	804.783	1011.85	917.709	1023.36
RABGAP1	1287.34	1212.2	1352.28	1225.06	1093.46	1381.88	1150.82	1355.87	1332.8	1167.46	1288.75	1355.7	1200.35	1355.33	1408.99	1282.96	1307.31	1294.68	1321.57	1399.51	1229.62	1357.53	1375.28	1193.7	1175.65	1121.78
DCN	4.18511	4.90768	1.72926	1.64659	8.34703	4.04355	1.79815	4.33739	1.94997	10.1599	0	0	3.48939	0	0.92272	2.09121	0	2.14174	0	4.44571	4.0919	9.9024	0	4.46242	3.08301	1.26185
QPCTL	203.396	245.384	231.721	209.117	288.569	232.504	236.457	223.809	192.072	241.99	234.397	213.661	225.065	511.009	298.039	265.584	201.448	216.316	289.093	213.394	212.779	187.245	189.283	203.04	231.226	219.561
PPP5C	1180.2	1292.36	1352.28	1272.81	1517.97	1269.67	1194.87	1267.39	1233.35	1057.55	1154.56	1420.21	959.581	1172.82	1194.92	1148.08	925.402	1074.08	1188.98	1363.05	1200.97	1188.29	880.231	1184.77	989.646	953.955
CEP68	1169.32	1175.39	987.406	1158.38	1095.85	1438.49	1282.08	1067.87	1307.45	1598.8	1276.55	954.351	1342.54	890.423	1311.19	1278.78	651.559	1288.26	844.456	1309.71	582.073	1206.29	1285.27	831.126	895.101	1073.83
MAP4K3	326.439	327.179	238.638	279.097	484.128	326.516	470.217	368.678	483.592	447.959	370.331	401.347	501.599	348.677	323.875	381.646	476.341	419.781	496.675	414.34	537.062	487.018	438.13	387.115	480.95	531.237
ZBTB32	77.8431	108.787	88.1922	68.3334	114.473	81.8818	247.246	44.2414	51.6741	82.2027	338.961	255.555	63.6813	463.942	290.657	222.714	39.8699	74.9609	429.292	385.887	48.0798	162.039	107.216	128.295	234.309	158.993
TYROBP	5166.94	5872.04	8226.95	7071.28	9896	6601.09	3577.42	7092.51	5796.27	5250.82	3012.31	6497.8	7057.28	3317.71	3803.45	2845.09	10549.8	8002.61	7130.6	5052.99	10316.7	5517.44	2611.57	13647.2	7834.96	11169.9
TMEM159	205.907	177.495	287.921	255.221	327.919	274.961	163.632	288.003	192.072	207.816	267.509	208.633	173.597	172.898	253.748	165.206	204.596	259.151	220.624	192.944	239.376	221.454	211.785	296.751	178.815	172.873
GABRA3	0	0	0	0	0	0	0	0	0	0	0	0	0	0	0	0	0	0	0	0	0	0	0	0	0	0
BRCA1	147.316	140.687	178.114	153.956	98.9719	150.622	162.733	163.953	163.797	145.009	194.315	348.56	279.151	476.429	220.53	224.805	314.763	119.937	183.672	248.96	157.538	222.354	145.602	203.04	209.645	198.11
ERCC1	1004.43	1257.18	1097.21	1034.88	1310.48	1193.86	908.966	1103.43	1030.56	1043.7	950.66	1013	1195.99	901.95	947.634	892.947	1110.06	1169.39	1181.37	1003.84	1038.32	1028.05	747.865	1150.19	837.551	975.407
CD22	3239.28	3210.44	2814.37	3085.71	2327.63	2338.18	2792.53	4428.48	5019.21	1526.75	6821.92	1739.45	1049.43	2239.03	7513.71	6290.36	358.829	2223.13	3841.89	4727.56	1687.91	4208.52	7919.43	1942.27	2083.09	929.98
SEMA3B	18.4145	11.4513	9.51092	13.996	31.0032	26.2831	35.064	26.8918	24.3746	48.0286	56.6388	45.2458	47.9791	26.8952	19.3771	58.5539	35.6731	39.6222	44.5595	31.1199	73.6542	42.3103	22.5021	31.237	15.415	16.404
MBTPS2	253.618	248.656	245.555	243.695	275.452	256.765	290.402	380.823	363.669	289.095	338.961	343.533	346.322	425.52	358.938	294.861	358.829	334.112	283.659	354.767	287.456	340.282	260.76	256.589	317.55	280.13
PRICKLE3	159.871	218.392	219.616	207.47	190.789	368.974	240.952	316.63	272.995	168.1	179.501	319.234	187.555	199.793	313.725	198.665	393.453	224.883	235.839	285.414	231.192	222.354	97.9505	240.971	154.15	127.446
LTF	66.9618	61.346	108.079	629.82	76.3157	306.299	661.72	369.546	63.3739	311.262	533.276	230.418	117.767	102.778	977.161	860.533	4620.72	4447.32	198.887	1196.78	227.1	280.868	330.914	468.554	66.7985	13.8803
EXTL3	1633.87	1314.44	2019.77	1592.25	1880.47	1777.14	1214.65	1745.37	1454.67	1266.29	1175.47	1507.35	1236.99	1460.03	1462.51	1019.47	2709.06	1694.12	1691.09	1430.63	1974.34	1315.22	837.874	1540.65	1193.12	1458.69
NR1H4	0	0	0	0	0	0	0	0	0	0	0	0	0	0	0	0	0	0	0	0	0	0	0	0	0	0
ELOVL5	4031.1	4055.38	3805.23	4074.48	4850.81	4784.53	3954.14	4110.98	3837.53	4098.13	4907.53	4048.66	4157.6	3979.53	4622.83	4831.74	3967.06	4914.22	3687.57	4265.21	4005.97	3868.24	4783.69	4340.82	4467.28	3712.35
ALOX5	3671.18	4749.82	6329.95	5430.45	7630.37	6783.05	3226.79	6507.82	6111.19	4394.61	4030.07	5291.24	4859.84	3119.84	5729.17	4698.95	9761.84	7316.19	5119.99	3872.21	7798.14	6808.35	3352.82	7357.42	4365.54	5004.48
KDM5D	0	0	0	0	4.76973	8.0871	0	0	0	0	0	0	0	0	0	3.13682	0	0	0	0	0	0	0	0	0	0
CALCOCO1	3736.47	4299.95	4960.38	4354.4	3121.79	3998.06	3817.48	3663.36	3390.02	4082.43	3713.76	3447.06	3098.57	3901.72	3846.82	3418.09	4062.54	4096.08	4187.5	3873.99	4281.15	3649.48	3028.52	3796.41	3217.63	3752.73
UBR7	871.34	847.393	833.502	810.122	696.38	760.187	814.563	758.176	703.938	652.08	879.208	946.81	645.536	926.924	960.552	817.664	960.026	727.121	853.151	843.795	682.324	831.802	890.82	893.6	954.705	729.347
MAP4K5	1101.52	937.367	841.284	955.845	1630.05	1116.02	1456.5	1098.23	1152.43	1290.31	1239.95	1005.46	1089.56	1215.09	1237.37	1379.15	1226.53	1022.68	1193.32	1048.3	1332.94	1254.9	1432.2	1099.99	1257.87	1222.73
EHD3	467.895	476.045	597.459	540.904	668.955	650	569.115	756.441	558.665	499.682	757.217	655.226	366.386	819.343	831.371	486.207	900.221	534.364	1041.17	642.849	1734.97	655.359	354.74	450.705	523.084	536.284
PSMC4	1346.77	1325.07	1518.29	1229.18	1193.62	1248.45	1177.79	1072.2	972.058	1032.61	1230.37	1426.92	1088.69	1436.01	1353.63	1312.24	1265.35	1127.63	1296.57	1353.27	1375.9	1310.72	1306.45	1501.61	1543.56	1247.97
MAN2B2	3086.1	2992.87	3331.42	3158.16	4303.49	3409.72	3650.25	3864.62	3432.92	2691.45	3380.9	3890.3	3065.43	3785.5	3599.53	3294.7	4471.73	3243.67	4392.91	3453.42	4285.24	3528.86	2538.77	3783.02	2816.84	2771.01
SLC7A14	0	1.63589	0	0	0	0	0	1.73496	0	0	0	0	0	0	0	0	0	0	0	0	0	0	2.64731	0	1.02767	0
CLDN11	14.2294	6.54358	6.0524	5.76306	0	3.03266	5.39446	8.67479	9.74983	5.54176	3.48546	4.18942	3.48939	4.80271	2.76816	9.41045	5.24604	8.56696	2.17363	8.00227	3.06892	8.10196	19.8548	7.80924	9.24903	7.57107
SLC25A39	1406.2	1229.37	1162.93	1223.42	1415.42	1502.18	3672.73	1323.77	993.508	2019.05	1333.19	1355.7	1322.48	1397.59	1591.69	3490.23	1528.7	1459.6	1361.78	1193.23	1712.46	2284.75	1859.74	1343.19	1167.43	1176.04
MVP	6193.96	6742.34	7357.99	6584.71	5752.29	6924.58	6983.13	6255.39	5132.31	6256.64	5893.05	6902.49	5903.17	6184.94	6805.98	6463.93	7864.87	6327.77	7756.61	6904.18	7429.87	6565.29	5652.01	7823.74	7174.16	6232.25
NUB1	2718.65	2283.71	2658.73	2370.26	2324.05	2472.63	2526.4	2621.52	2166.41	1942.39	2323.93	2972.81	2506.25	2400.4	2949.01	2916.19	3556.82	2217.77	3046.35	2954.62	2416.27	2766.37	3576.52	3273.19	3032.65	2577.95
PGM3	416	383.617	363.144	397.651	335.073	331.571	375.814	300.148	423.143	372.221	378.173	308.342	369.003	533.101	346.943	375.372	246.564	358.742	310.829	337.874	304.846	324.079	361.358	362.572	415.179	344.484
RWDD2A	132.25	159.5	117.59	121.024	100.164	112.208	147.449	124.049	107.248	169.024	120.249	73.7338	119.511	224.767	113.495	136.974	71.3462	113.512	113.029	131.593	84.9069	131.432	127.071	143.913	154.15	158.993
CLK1	6388.99	4682.75	3437.77	4225.15	11892.1	6486.86	8667.1	6556.4	6561.64	8963.79	7425.78	5650.69	7343.41	5988.02	7154.77	9993.9	6445.29	6576.22	7269.71	5798.98	7862.58	9192.13	10057.1	6962.5	6902.86	8425.34
POLR3B	166.567	157.046	168.603	189.358	171.71	153.655	148.348	156.146	200.847	196.732	189.958	124.845	207.618	207.477	179.008	159.978	158.431	194.898	169.543	135.149	159.584	200.749	202.519	139.451	165.455	171.611
ANGEL1	1051.3	980.719	1009.02	936.909	728.576	978.539	837.939	955.094	828.736	897.765	1060.45	754.934	830.474	915.397	974.393	956.729	921.205	902.744	886.842	971.831	807.127	857.008	693.595	764.19	706.009	628.399
RNF14	559.968	660.901	771.249	724.499	437.623	634.837	517.868	569.066	466.042	350.978	576.844	668.632	614.132	610.905	611.764	541.624	720.806	522.585	535.8	641.071	547.292	480.717	579.761	622.508	677.234	613.257
DNASE1L1	465.384	551.296	464.306	452.812	567.598	614.619	464.822	489.258	457.267	513.536	404.314	547.139	545.217	365.967	476.124	348.187	674.641	537.577	531.453	509.478	684.37	507.723	354.74	593.502	576.523	490.858
DDX11	1189.41	1105.86	1162.06	1192.13	844.242	1844.87	1129.24	312.292	292.495	1080.64	1230.37	378.724	1728.99	1837.52	1849.13	1083.25	1391.25	962.713	323.871	1634.24	1362.6	1736.52	968.916	905.872	776.918	328.08
HEBP1	366.616	363.986	468.629	428.936	537.787	471.073	266.127	464.969	373.419	373.145	325.891	409.726	511.195	295.847	428.142	247.809	612.738	533.293	443.421	396.557	561.613	381.693	221.05	645.936	397.708	417.671
GPRC5A	3.34809	3.27179	3.45852	1.64659	4.76973	0	10.7889	2.60244	0	13.8544	4.35683	0.837885	5.23408	0.960543	1.84544	8.36485	1.04921	3.21261	8.69453	0	9.20677	2.70065	9.26559	2.23121	5.13835	5.04738
MAMLD1	13.3924	57.2563	62.2533	45.2812	35.773	31.3375	170.825	39.0365	33.1494	64.6538	75.8088	98.0325	60.1919	51.8693	43.3679	94.1045	17.8365	89.9531	46.7331	127.147	98.2056	84.6205	91.3322	16.7341	175.732	37.8554
CD6	6373.92	6545.21	6235.71	5799.29	6877.95	8255.91	9522.12	6259.73	6033.2	12000.7	7372.63	7569.45	7170.69	8120.43	7949.23	11282.1	2017.63	8755.44	6965.4	8249.45	4449.94	6650.81	8282.11	3994.98	6538.04	4001.31
TACC3	1957.79	2275.53	2369.08	2219.6	1730.22	2447.36	1991.45	1911.92	1906.09	2240.72	2339.62	2074.6	2158.19	2256.32	2139.79	2198.91	2072.19	2399.82	1676.96	1959.67	1881.25	2057	1826.64	2522.38	1892.97	1692.13
UFL1	1458.09	1305.44	1405.02	1430.89	1216.28	1548.68	1435.82	1443.48	1733.52	1556.31	1635.55	1563.49	1523.12	1748.19	1847.29	1556.91	1473.09	1462.81	1272.66	1565.78	1340.1	1446.65	1369.98	1089.95	1541.5	1412.01
POLA2	491.332	519.396	536.07	517.852	425.698	508.476	459.428	505.74	442.642	428.563	533.276	535.408	526.025	617.629	546.25	489.343	550.835	441.199	439.074	384.998	323.26	478.916	442.101	494.213	444.981	441.646
ZC3H3	853.763	866.206	918.236	657.812	1356.99	1789.27	1487.07	1586.62	1438.1	1195.17	1234.73	1297.05	1511.78	1492.68	1461.59	1197.22	1813.03	1499.22	1269.4	1243.02	1274.63	1451.15	528.139	718.45	802.61	950.17
CAPN1	4119.82	4685.2	5143.68	4716.65	5280.09	4579.32	4089	5266.46	4288.95	4057.49	4606.91	5233.43	3989.24	4191.81	5566.77	4118.64	5957.41	5082.35	5300.4	4695.55	5612.04	4321.05	3163.54	5237.77	4566.97	4607
ACPP	389.215	406.52	542.987	537.611	822.778	908.787	440.547	828.442	724.412	569.877	452.239	630.089	766.793	474.508	521.337	260.356	1376.56	1028.04	770.553	672.191	1206.09	680.565	162.81	889.138	430.594	633.446
MDH1	1838.1	1829.75	1844.25	1777.49	1565.66	1623.48	1806.24	1500.74	1442	1514.75	1730.53	1905.35	1948.82	2011.38	1791.92	1640.56	1613.68	1594.53	1794.33	1634.24	1584.59	1744.62	2017.25	2216.71	2473.6	2035.36
SLC30A9	1025.35	1005.26	1013.35	999.479	1416.61	1265.63	1191.28	1223.14	1273.33	1207.18	1262.61	1261.85	1390.52	1359.17	1256.74	1168.99	1301.02	1312.89	1334.61	1216.35	1239.85	1295.41	1342.19	1210.43	1435.65	1322.41
MTMR11	701.425	681.35	545.581	607.591	893.132	959.332	530.455	854.466	733.187	536.627	387.758	747.393	1097.41	393.823	737.253	327.275	940.091	959.5	855.324	750.435	886.919	795.793	162.81	1133.46	1000.95	519.88
COX15	915.702	796.681	913.913	876.809	604.563	926.983	757.022	910.853	944.759	740.748	842.611	1010.49	868.857	1010.49	992.847	702.647	1127.9	904.886	911.839	963.829	766.208	803.895	638.002	817.739	882.768	623.352
CCDC88C	7837.88	7624.09	7779.93	7341.32	11360.3	7763.61	9880.85	8745.92	8225.93	9198.39	8964.61	8810.36	8357.08	10610.2	8038.74	9597.61	8799.71	7330.11	9985.67	8950.1	8430.34	8974.27	7518.36	6808.54	7674.64	8019.03
YAF2	524.813	420.425	519.642	553.254	672.532	655.055	722.857	666.224	740.987	718.581	711.906	855.48	703.984	705.999	659.745	704.738	812.088	614.68	748.816	718.426	831.679	802.094	606.234	562.265	550.831	617.042
ZMYND11	1189.41	1073.96	1147.36	1035.7	1184.09	1298.99	1403.46	1118.18	1086.13	1259.83	1278.29	1068.3	987.496	1195.88	1186.62	1224.4	1153.08	1132.98	1144.42	1096.31	893.057	1095.57	1420.28	1012.97	1204.43	1125.57
WAS	4722.48	5045.1	6240.89	5042.68	6660.93	6825.51	5510.44	6648.36	5768	5296.07	5321.43	6387.19	6162.26	5521.2	6032.74	5261.49	8838.54	6554.8	6725.22	5671.83	7049.32	6439.26	3873.02	6953.57	4928.7	5501.65
DPEP1	0	0	0.864629	0.823294	2.38486	1.01089	1.79815	0	0.974983	1.84725	1.74273	2.51365	0	4.80271	2.76816	1.04561	0	3.21261	1.08682	1.77828	0	3.60087	0	2.23121	1.02767	0
BID	1453.91	1429.77	1467.28	1332.09	2529.15	1872.16	1389.07	1536.3	1319.15	1798.3	1401.16	2097.23	2267.23	1473.47	1468.05	1210.81	1882.28	1942.56	2323.61	2117.93	3104.73	1795.94	1094.66	2532.43	2158.11	1380.46
MATR3	11851.4	9210.9	9241.16	9073.53	12796	9078.78	12005.4	9432.96	8825.55	11498.2	11509.9	9572.83	11549	11011.7	10883.5	12202.2	9960.14	10429.2	11664.8	10472.3	10538.7	11692.9	14638.3	11042.3	12734.9	11868.9
NPC1L1	0.837022	1.63589	2.59389	2.46988	5.96216	1.01089	5.39446	1.73496	4.87492	0	5.2282	0.837885	3.48939	4.80271	6.45904	3.13682	2.09842	5.35435	3.26045	3.55657	0	3.60087	3.97097	0	2.05534	0
XYLT2	715.654	795.863	819.668	745.905	742.885	894.635	814.563	813.695	743.912	862.667	780.744	809.397	737.133	787.645	866.434	713.103	779.562	870.618	737.948	814.453	609.693	751.682	524.168	664.901	500.475	575.402
RGPD5	27.6217	13.0872	12.1048	28.8153	60.814	43.4681	92.6049	39.904	73.1237	84.9736	50.5392	41.0563	88.9793	52.8299	39.677	59.5995	25.181	47.1183	43.4726	37.3439	51.1487	54.9133	18.5312	11.1561	31.8578	49.212
STMN4	1.67404	2.45384	0	1.64659	1.19243	0	6.29353	0	0	3.69451	0	0	0	0	0.92272	1.04561	0	1.07087	0	0	0	0	0	0	1.02767	2.52369
NUDCD3	1679.9	1806.03	1800.16	1654	1475.04	1649.77	1649.81	1367.15	1436.15	1534.14	1546.67	1671.58	1424.54	1419.68	1680.27	1668.79	1430.07	1423.19	1498.72	1602.23	1258.26	1723.02	1998.72	1518.34	1621.66	1414.53
ISL1	0	0	0	0	0	0	0	0	0	0	0	0	0	0	0	0	0	0	0	0	0	0	0	0	0	0
CHDH	15.9034	27.8102	7.78166	17.2892	21.4638	22.2395	19.7797	4.33739	6.82488	13.8544	19.1701	12.5683	12.2129	17.2898	20.2998	8.36485	10.4921	7.49609	16.3022	14.2263	49.1028	29.7072	17.2075	15.6185	64.7432	6.30923
IL20RA	0	0	0.864629	1.64659	0	0	0	0	0	0	0	0	0.872347	0	0	0	2.09842	0	6.5209	0	0	1.80044	0	0	0	0
CLCA1	0	0	0	0.823294	0	0	0	0	0	0	0	0	0	0.960543	0	0	0	0	0	0	0	0	0	0	0	0
CLCA4	0.837022	1.63589	0	2.46988	0	2.02177	1.79815	0.867479	1.94997	0	0	0	0.872347	1.92109	0	0	0	0	0	0.889141	0	3.60087	2.64731	0	1.02767	0
GLT8D1	1026.19	1016.71	979.625	964.078	693.996	917.885	866.71	929.937	814.111	782.312	862.652	998.759	754.58	1131.52	1050.06	836.485	1081.73	910.24	850.977	943.379	754.955	850.706	987.447	958.305	953.678	853.008
ATP2C1	1639.73	1566.37	1716.29	1786.55	1907.89	1991.45	1887.16	1839.92	1831.99	1822.31	1757.55	2210.34	1801.4	2004.65	1997.69	1755.57	2052.25	1723.03	1941.05	1788.95	2050.04	1903.96	1827.97	2009.21	2051.23	1740.08
SRCIN1	2.51107	5.72563	1.72926	3.29318	3.5773	5.05443	6.29353	5.20487	10.7248	6.46538	3.48546	12.5683	7.85112	6.7238	9.2272	5.22803	6.29525	7.49609	7.60771	8.00227	7.16082	2.70065	2.64731	3.34682	0	1.26185
IGF1	13.3924	7.36152	14.6987	5.76306	16.6941	11.1198	37.7612	0.867479	0	5.54176	18.2987	25.1365	6.10643	269.913	74.7403	25.0945	2.09842	2.14174	52.1672	12.448	8.1838	30.6074	14.5602	24.5433	65.7709	68.1397
SLC38A5	402.608	422.061	447.878	365.543	461.471	399.3	780.398	346.124	317.845	412.861	571.616	787.612	405.641	1177.63	723.413	963.003	567.622	370.521	635.787	574.385	372.363	727.376	786.251	510.947	774.863	620.828
MAGIX	16.7404	25.3564	27.6681	30.4619	51.2746	40.4355	41.3575	43.3739	41.9243	45.2577	41.8256	26.8123	34.0215	44.185	34.1406	29.277	59.8049	53.5435	41.299	37.3439	51.1487	29.7072	26.4731	27.8901	23.6364	18.9277
RALBP1	2149.47	1968.8	2545.47	2165.26	1921.01	2375.58	2260.28	2627.59	2150.81	2149.28	2447.67	2755.8	2393.72	2377.34	2640.83	2125.72	2948.28	2380.55	2482.29	2514.49	2624.95	2159.62	1715.46	2328.27	2067.67	1675.73
RUFY3	1175.18	1202.38	1037.55	1223.42	1583.55	1319.21	1230.84	1746.23	1826.14	1186.86	1016.01	1165.5	1762.14	1255.43	1376.7	1289.23	1207.64	1270.05	1418.29	1296.37	1535.49	1277.41	974.21	1327.57	1164.35	1222.73
CNTN1	0	0	0	0	0	2.02177	0	0	0	0	0	0	0	0	0	0	0	0	0	0	0	0	0	0	0	0
SLC11A1	4123.17	4328.58	6272.02	5598.4	12800.8	10572.9	5805.34	12745.9	12979	6608.55	6058.61	9667.51	9593.19	5153.31	5930.32	4357.04	24629.1	9339.06	8225.02	7089.12	10683.9	7803.09	2123.14	8847.87	6042.7	13740.2
WWTR1	18.4145	16.3589	19.8865	19.7591	22.6562	18.196	39.5594	19.0845	17.5497	13.8544	47.0538	46.9215	9.59581	26.8952	20.2998	31.3682	9.44288	17.1339	31.5177	40.0114	22.5054	20.705	23.8258	21.1965	26.7194	15.1421
AGPS	1391.13	1181.93	1391.19	1268.7	1737.37	1289.89	1508.65	1703.73	1522.92	1357.73	1417.71	1620.47	1699.33	1809.66	1672.89	1540.18	2434.16	1471.38	1679.13	1534.66	1689.95	1497.06	1261.44	1633.25	1728.54	1684.56
ZNF806	0	0	0	0	0	0	0	0	0	0	0.871366	0	0	0.960543	0	0	0	0	0	0	0	0	0	0	0	0
CXorf56	472.918	523.486	545.581	513.736	596.216	429.627	436.052	416.39	410.468	441.493	452.239	413.915	328.875	466.824	489.964	407.786	482.636	506.522	494.501	439.236	453.178	480.717	618.147	527.682	565.218	495.905
ATP1A2	2.51107	3.27179	1.72926	2.46988	2.38486	2.02177	1.79815	0.867479	3.89993	4.61813	1.74273	1.67577	3.48939	0.960543	0.92272	0	1.04921	3.21261	0	0	1.02297	0.900218	1.32366	2.23121	2.05534	3.78554
TTC27	679.662	632.273	554.227	540.081	420.929	510.498	538.547	402.51	446.542	442.417	620.413	476.756	471.067	500.443	637.6	605.406	364.075	500.097	491.241	540.598	374.409	616.649	726.687	576.768	623.796	458.05
ZNF582	107.139	104.697	120.183	121.024	76.3157	125.35	78.2196	87.6153	71.1738	68.3483	112.406	64.5171	75.8941	70.1196	96.8856	110.834	96.5272	103.874	92.3794	92.4707	46.0339	89.1216	129.718	72.5144	68.8539	55.5212
VSIG2	41.0141	94.0639	94.2446	81.5062	189.597	139.502	58.44	157.014	116.998	107.141	176.887	113.952	146.554	52.8299	95.0402	47.0523	118.561	137.071	96.7266	118.256	180.044	66.6161	17.2075	79.208	58.5772	61.8304
PHLDB1	35.1549	35.9897	42.3668	35.4017	41.7351	47.5117	67.4307	30.3618	41.9243	49.8758	35.726	22.6229	46.2344	28.8163	30.4498	52.2803	31.4763	51.4018	42.3858	42.6788	19.4365	46.8113	26.4731	31.237	22.6087	29.0224
MARCO	201.722	510.399	687.38	410.824	155.016	289.114	176.219	724.345	571.34	336.2	158.589	1028.08	744.984	286.242	253.748	143.248	763.824	335.182	487.98	102.251	586.165	628.352	104.569	692.791	479.922	176.658
CYP24A1	5.85916	26.1743	4.32315	9.05624	3.5773	16.1742	12.5871	4.33739	2.92495	10.1599	37.4687	15.9198	11.3405	27.8557	14.7635	1.04561	2.09842	13.9213	1.08682	7.11313	5.11487	9.9024	2.64731	20.0809	11.3044	15.1421
PRDM11	93.7465	65.4358	84.7337	80.6829	102.549	109.176	67.4307	112.772	93.5984	86.8209	111.535	68.7065	55.8302	87.4094	132.872	87.8309	82.8875	102.804	83.6848	80.9119	88.9988	76.5185	56.9172	35.6994	58.5772	45.4264
SYT13	0.837022	0	0	0.823294	0	0	0	0	0	0	0	0	0	0	0	0	0	0	1.08682	0	1.02297	0	0	0	0	0
SNAI2	0	0	0	0	0	0	0	0	0	0	0	0	0	0	0	0	0	0	0	0	0	0	0	0	0	0
CD74	71721.9	98854.6	88146.3	77487.6	139689	95757.3	71726.5	123622	114008	74512.6	101340	73572.1	115081	70690.2	132960	102078	86030.9	99743	137204	97595.7	124741	106324	93004	93582.6	76065	76438.8
HGF	171.59	238.023	363.144	317.792	255.181	409.409	92.6049	477.113	407.543	217.052	108.921	316.72	257.342	190.187	249.134	81.5572	576.016	343.749	261.923	270.299	511.487	291.671	48.9753	516.525	302.135	358.364
ZRANB1	1365.18	1216.29	1315.1	1383.13	1962.74	1454.67	1514.94	1370.62	1183.63	1439.01	1380.24	1225.83	1132.31	1308.26	1317.64	1377.06	1604.24	1363.22	1724.78	1300.81	1487.41	1487.16	1944.45	1600.89	1433.6	1592.45
NCDN	703.936	790.137	777.302	718.736	679.686	843.08	778.6	692.248	596.69	694.567	835.64	758.286	683.047	803.974	864.589	765.383	755.43	789.232	604.27	762.883	622.992	746.281	528.139	744.109	794.389	588.02
GPR124	154.849	222.482	268.035	177.008	471.011	359.876	58.44	454.559	383.168	225.365	97.593	377.886	328.002	167.134	172.549	101.424	302.172	416.569	244.534	240.957	251.652	424.903	31.7677	396.04	122.293	233.441
CCT8L1P	0	0	0	0	0	1.01089	0	0	1.94997	0	0	1.67577	0	0	0	0	1.04921	0	0	0	0	0.900218	0	0	0	0
ZFP64	358.245	335.358	376.114	350.723	271.875	435.692	289.503	338.317	292.495	234.601	344.19	366.156	294.853	408.231	460.437	362.825	385.06	341.608	346.694	326.315	287.456	349.285	287.233	303.445	262.056	215.776
MNAT1	139.783	117.784	134.882	90.5624	112.089	93.0016	132.164	112.772	77.9987	103.446	122.863	128.196	119.511	129.673	120.876	110.834	134.299	97.4492	154.328	106.697	103.32	114.328	193.254	127.179	177.787	222.085
SAMD4A	272.869	118.602	127.1	205	88.24	166.796	231.962	342.654	278.845	89.5918	156.846	376.21	388.194	179.622	226.989	337.731	412.339	114.583	527.106	338.763	477.729	301.573	326.943	393.809	293.914	251.107
RUNX3	11384.3	8729.95	10236.3	7566.9	25131.7	11582.7	16617.6	13660.2	9428.09	11315.3	9998.05	14095.7	9192.79	15948.9	10761.7	11038.5	21268.5	9646.4	20033.3	14055.5	13565.7	11480.5	7268.19	6462.7	7729.11	11807.1
MRE11A	731.557	951.273	542.122	615.824	527.055	547.901	763.316	806.755	919.409	733.359	561.16	750.745	818.261	630.116	750.172	732.97	819.432	688.57	669.479	700.643	501.258	487.918	664.475	696.138	533.361	709.157
PLEKHB1	775.083	723.883	551.633	679.218	378.001	896.657	846.031	464.101	526.491	872.827	628.255	412.239	731.899	355.401	579.468	744.471	245.515	931.657	404.296	551.268	376.455	674.263	852.434	602.427	722.452	381.077
SERPINB1	3816.82	4567.42	6335.14	5763.06	6883.91	6173.49	4775.89	6987.54	5705.6	4064.88	5063.51	5860.17	5804.59	4683.61	4521.33	4244.11	14532.6	8186.8	6586.11	4766.69	6052.94	5467.02	3969.64	7860.56	5945.07	8631.02
CYP3A43	0.837022	1.63589	2.59389	1.64659	0	1.01089	0.899076	0.867479	3.89993	2.77088	0.871366	2.51365	1.74469	2.88163	0	5.22803	3.14763	7.49609	1.08682	1.77828	2.04595	2.70065	1.32366	1.11561	1.02767	0
SLC7A9	7.5332	8.17947	6.0524	5.76306	2.38486	14.1524	12.5871	5.20487	8.77485	2.77088	6.97093	5.02731	14.8299	3.84217	7.38176	7.31924	1.04921	11.7796	8.69453	8.00227	3.06892	9.00218	7.94193	11.1561	5.13835	7.57107
SPAST	1254.7	1026.52	1182.81	1196.25	1312.87	1269.67	1329.73	1662.96	1442.98	1487.96	1527.5	1486.41	1385.29	1583.94	1496.65	1307.01	2096.32	1612.73	1820.42	1574.67	1864.88	1517.77	1188.64	1499.37	1490.12	1314.84
NRXN3	0	0	0.864629	0	0	0	0	0	0	1.84725	0	0	0	0	1.84544	0	0	0	0	0	0	0	1.32366	0	0	0
OSBPL5	2229.83	1392.96	2106.24	1572.49	2535.11	1576.98	1371.99	1943.15	1525.85	1385.44	801.657	1746.99	1366.97	1838.48	1401.61	1092.66	5194.63	1029.11	2306.22	2611.41	2158.48	1461.05	528.139	1490.45	771.78	1581.09
AQR	1833.08	1508.29	1711.97	1807.95	1884.04	1725.58	1906.04	1815.63	2095.24	2014.43	2005.88	1831.62	2122.42	2163.14	1896.19	2008.61	2112.06	1868.67	2047.56	1928.55	1805.55	2232.54	1899.45	1654.44	1859.05	2064.38
CPS1	8.37022	8.99742	8.64629	9.05624	2.38486	9.09798	9.88984	5.20487	11.6998	4.61813	10.4564	5.86519	3.48939	7.68434	6.45904	8.36485	3.14763	5.35435	7.60771	8.00227	2.04595	3.60087	9.26559	2.23121	6.16602	7.57107
C8B	0	0	0.864629	0	0	0	0	0	2.92495	0	0	0	0	0	0	0	0	0	0	0	0	0	0	0	0	0
FHL1	562.479	686.258	644.149	582.069	519.9	735.926	594.289	743.429	593.765	618.83	604.728	392.13	487.642	380.375	537.946	466.34	389.256	824.57	646.656	548.6	543.2	542.832	473.869	306.792	468.617	331.865
RTFDC1	1651.44	1689.06	1828.69	1661.41	1581.17	1432.43	1264.1	1424.4	1273.33	1325.4	1273.07	1586.12	1440.24	1299.61	1363.78	1230.68	1721.75	1502.43	1418.29	1350.61	1718.6	1326.92	1542.06	2263.56	1744.98	1766.58
GABRA1	0	0	0	0	0	0	0	0	0	0	0	0	0	0	0	0	0	0	0	0	0	0	0	0	0	0
NLRP2	389.215	667.445	178.114	396.828	149.054	372.006	891.884	261.979	257.396	763.839	911.449	598.25	159.639	385.178	260.207	58.5539	777.464	324.474	453.202	120.034	389.753	402.398	55.5935	471.901	616.602	195.586
SLC45A4	385.03	458.05	631.179	568.896	465.049	510.498	495.391	701.79	676.638	1121.28	907.963	769.178	662.111	752.105	602.536	732.97	1228.62	879.185	544.495	606.394	592.302	694.068	579.761	669.363	504.586	418.933
RNF10	3888.81	4152.72	4170.11	3819.26	5949.04	4991.76	7875.01	5023.57	4303.58	5177.85	4635.67	5691.75	4664.44	4858.43	5289.96	7671.61	5796.88	4965.63	5326.49	4815.59	5779.81	5834.31	5458.76	4880.78	4436.45	4401.32
ZNF839	699.751	670.717	546.446	629.82	660.607	663.142	772.307	688.778	746.837	873.751	731.947	692.931	747.601	652.209	698.499	769.566	542.441	769.956	700.996	612.618	603.555	782.29	751.836	574.537	583.717	639.756
ZDHHC6	1462.28	1514.84	1357.47	1423.48	1591.9	1687.17	1456.5	1528.5	1431.28	1456.56	1353.23	1537.52	1411.46	1466.75	1365.63	1469.08	1526.6	1399.63	1337.87	1410.18	1185.63	1345.83	1675.75	1548.46	1553.84	1438.5
GRAMD1B	453.666	431.058	529.153	397.651	686.841	518.585	579.904	630.657	619.114	457.195	415.642	680.362	668.217	546.549	380.161	563.581	1034.52	588.979	660.784	466.799	741.657	613.949	461.956	794.311	572.412	914.838
RNH1	4517.41	4740.82	5211.98	4197.16	7728.15	5472.94	4540.34	5744.44	4884.67	4602.43	3784.34	5325.59	6575.75	4158.19	4755.7	3848.87	5698.25	5214.07	6731.74	5280.61	7262.1	4989.01	2501.71	7380.85	5112.66	4950.22
NDUFS1	1465.63	1261.27	1428.37	1368.32	1323.6	1254.51	1242.52	1345.46	1279.18	1185.01	1372.4	1123.6	1277.12	1799.1	1542.79	1279.82	1451.06	1207.94	1361.78	1458.19	1142.66	1377.33	1201.88	1517.22	1649.41	1514.21
RB1CC1	2239.87	2021.15	2212.59	2138.92	2579.23	2428.15	2731.39	2718.68	2645.13	2782.89	2675.96	2580.68	2744.4	2521.42	2653.74	2523.05	2897.91	2678.25	2694.22	2490.48	2685.31	2518.81	2930.57	2336.08	2419.14	2810.13
ERP44	1982.07	1909.91	2343.14	2026.13	2668.66	2303.81	2099.34	2643.21	2127.41	1849.1	2018.95	2586.55	2557.72	2587.7	2291.11	2148.72	3243.1	2298.09	2698.56	2462.03	2859.21	2432.39	2128.44	3256.45	2615.42	2633.47
ALAS1	491.332	575.017	740.987	605.121	668.955	667.185	353.337	659.284	608.389	411.014	443.525	791.801	552.195	603.221	770.471	509.21	1039.77	482.963	496.675	592.168	590.256	557.235	454.014	742.993	583.717	498.429
BIRC3	5242.27	6372.63	4752.87	5587.7	6962.61	6234.14	8231.94	6052.4	7837.89	6509.72	9700.05	4661.15	6192.79	5160.04	8309.1	10434.1	2650.3	5630.64	6115.51	5923.46	4771.15	6660.71	16793.2	5853.58	10619.9	7000.72
AKAP11	2685.17	2103.76	2158.11	2794.26	2165.46	2255.29	2992.13	2938.15	3385.14	3069.21	4165.13	3066.66	3031.4	3307.15	3365.16	3162.96	2096.32	2806.75	2955.05	3559.23	2887.86	2949.11	3355.47	2195.51	3223.8	2874.48
GLRX2	101.28	72.7973	86.4629	74.9198	139.515	94.0125	71.027	91.0853	83.8485	102.523	64.4811	123.169	86.3623	121.028	83.0448	73.1924	122.757	80.3153	131.505	100.473	99.2286	79.2192	84.7139	127.179	84.2689	97.1621
SNAPC1	94.5835	113.695	91.6507	116.908	95.3946	104.121	83.6141	65.0609	89.6984	75.7374	96.7216	56.1383	89.8517	84.5278	92.272	82.6029	83.9367	94.2366	118.463	73.7987	77.7461	61.2148	129.718	104.867	113.044	112.304
DERA	554.946	460.504	529.153	529.378	422.121	542.846	508.877	610.705	575.24	458.119	574.23	630.927	633.324	572.484	611.764	485.161	755.43	548.286	624.919	515.702	725.289	505.923	472.545	709.525	626.879	521.142
STRAP	1936.03	1756.13	1957.52	1825.24	3214.8	1888.34	2631.6	2081.95	1706.22	2612.02	2241.15	2072.09	2312.59	2378.3	2197	2387.12	2119.4	2390.18	2625.75	1873.42	2944.12	2283.85	2857.77	2398.55	2596.92	2449.24
ABCC2	136.435	130.054	110.673	145.723	125.205	129.394	119.577	106.7	120.898	139.468	121.12	113.114	147.427	98.9359	158.708	219.577	81.8383	132.788	107.595	152.043	139.125	133.232	207.814	120.485	106.878	112.304
DEF6	4522.43	4816.07	4808.2	4261.37	4521.7	5038.26	4391.99	4153.49	3955.51	4683.71	4274.92	4739.08	4563.24	5098.56	4970.69	4811.88	4549.37	4577.97	4100.56	4477.72	3460.72	4551.5	3544.75	3962.63	3636.92	3530.64
PLEKHO1	2988.17	3387.94	4232.36	3815.97	5751.1	6010.73	3943.35	6241.51	4889.54	4718.81	4132.89	5700.97	7581.56	4001.62	5177.38	3703.54	6591.13	6328.84	8190.25	5851.44	8487.62	5893.73	2152.26	4925.4	3756.13	2741.99
GCLM	301.328	315.728	489.38	340.021	337.458	439.736	458.529	416.39	358.794	333.429	468.795	576.465	311.428	619.55	504.728	402.558	622.181	385.513	362.997	606.394	336.559	375.391	315.03	206.387	340.159	352.055
UBR2	2499.35	2363.05	2536.82	2862.59	3417.51	2779.94	3704.19	3246.97	3905.78	3526.41	3407.04	3678.31	3758.07	3792.22	2985.92	3213.15	3881.02	3373.24	3482.16	3345.84	3731.81	3408.23	3073.53	3057.88	3181.67	4083.33
EHD2	2.51107	4.08974	10.3755	21.4057	17.8865	10.1089	8.09169	15.6146	3.89993	6.46538	20.9128	6.70308	5.23408	8.64489	10.1499	10.4561	11.5413	11.7796	10.8682	10.6697	28.6433	4.50109	5.29462	7.80924	8.22136	3.78554
DEPDC1	8.37022	9.81537	14.6987	12.3494	7.15459	6.06532	18.8806	6.07235	6.82488	3.69451	25.2696	50.2731	27.9151	78.7645	47.0587	40.7786	16.7873	6.42522	16.3022	10.6697	4.0919	19.8048	15.8839	18.9653	29.8024	27.7606
CCDC28A	467.058	487.496	581.031	498.916	428.083	410.42	454.034	439.812	382.193	413.785	429.583	546.301	496.365	473.548	505.651	421.379	616.935	455.12	508.63	505.921	402.029	504.122	657.857	613.583	637.155	560.259
RRAGD	195.863	203.669	220.48	248.635	536.595	336.625	264.328	507.475	375.369	463.66	322.405	342.695	500.727	273.755	446.597	352.369	651.559	493.671	460.81	465.91	789.737	484.317	305.764	577.884	464.507	248.584
HSF2	825.304	629.001	455.66	503.033	820.393	578.227	592.491	479.716	540.141	793.395	501.907	386.265	639.43	511.009	467.819	672.324	423.88	480.821	611.877	419.675	510.464	545.532	747.865	478.595	452.175	749.536
PHF20	2390.54	2001.52	2363.9	2142.21	1941.28	1966.18	1895.25	2134	2080.61	1893.43	2182.77	1664.88	1943.59	1962.39	2157.32	1934.37	2313.51	2440.51	2046.47	2042.36	1905.8	1918.36	2168.15	1812.86	1966.96	2263.75
HSD17B6	5.85916	5.72563	12.1048	4.93977	0	11.1198	14.3852	11.2772	6.82488	1.84725	10.4564	15.9198	5.23408	8.64489	4.6136	9.41045	4.19684	3.21261	4.34726	14.2263	5.11487	5.40131	2.64731	6.69363	11.3044	2.52369
NR1H3	172.427	155.41	222.21	176.185	122.821	147.589	115.981	134.459	112.123	109.912	84.5225	182.659	121.256	112.384	106.113	74.238	321.058	115.654	129.331	126.258	189.25	158.438	72.8011	174.034	96.601	113.566
TYMP	4994.51	3889.34	5937.41	6930.49	8530.66	7457.31	7598.09	12808.3	11011.5	3671.41	2828.45	13389.4	15116	6647.92	4912.56	6257.95	19493.3	7003.49	15953.4	8799.83	10733.1	12567	3370.03	18867.1	11658.9	14706.8
NCAPH2	1263.07	1343.07	1315.97	1295.04	1918.62	1415.24	1790.96	1289.07	1220.68	1760.43	1371.53	1250.12	1622.56	1468.67	1410.84	1614.42	1376.56	1536.7	1665	1279.47	1445.46	1720.32	1577.8	1540.65	1397.63	1583.62
TOMM34	378.334	425.333	404.646	295.563	465.049	485.226	376.713	410.317	398.768	255.844	379.916	456.647	429.194	413.994	530.564	479.933	410.241	353.387	403.209	389.444	353.949	470.814	434.159	398.271	292.886	368.459
SEC63	2435.73	2349.14	2233.34	2323.34	3293.5	2508.01	2690.94	2670.1	2698.75	2543.67	2639.37	2427.35	2630.12	3183.24	2904.72	2576.37	2719.55	2632.2	2737.69	2680.76	2710.88	2789.78	2653.93	2912.85	3039.85	2794.99
KPNA6	1970.35	1655.52	1729.26	1663.05	2477.87	2092.54	2091.25	2231.16	2340.93	2207.47	2309.99	1951.43	2118.06	2367.74	2353.86	2307.65	2139.34	2227.41	2445.34	2426.47	1980.48	2177.63	1892.83	1483.76	1709.02	2092.14
VIM	15839.8	23209.2	20232.3	23816.3	39704.4	32093.6	32079.9	35489.4	27494.5	33243.2	22088.3	26392.5	30445.8	20775.6	33331.4	25940.4	40570.8	42650.6	42126.1	25122.7	38008.6	31290.7	13468.2	34773.4	27140.8	27594
RTEL1-TNFRSF6B	135.598	161.954	120.183	118.554	180.057	241.602	214.879	209.93	252.521	238.296	240.497	222.877	285.257	283.36	177.162	176.707	190.956	224.883	204.321	198.279	206.641	190.846	99.2742	85.9016	149.012	148.898
FAS	699.751	1185.21	1097.21	1014.3	1248.48	887.559	1928.52	1265.65	1069.56	873.751	1578.04	1902	1120.97	1573.37	1258.59	1243.23	1701.82	1337.52	1422.64	1195.89	1027.07	991.14	1330.27	1795.01	1970.04	1495.29
RNASET2	2610.67	2648.51	1699.86	2157.03	2629.31	3024.57	2057.09	2808.03	3076.07	3168.96	3061.11	2497.73	2673.74	1894.19	2571.62	3228.83	2390.1	2547.6	2687.7	2469.15	3960.96	2350.47	2557.3	2848.14	2312.26	2373.53
CD44	15597.9	17329.8	18575.7	18909.4	23194	21821	20451.3	19629.3	18400.9	22161.5	18828.5	15146.4	22875.5	15893.1	21729.1	18263.6	16330.9	27647.7	22424.3	19665.1	27177.4	19952.4	15392.8	20440.1	21570.8	19508.1
KCNG1	5.85916	15.541	26.8035	22.229	7.15459	22.2395	30.5686	52.9162	52.6491	22.167	60.9956	11.7304	27.9151	13.4476	35.0634	23.0033	0	25.7009	9.78134	39.1222	6.13785	33.3081	5.29462	7.80924	7.19369	1.26185
AGPAT4	673.803	525.94	1126.61	991.247	990.911	921.929	938.636	1048.78	973.033	817.409	508.878	837.885	649.026	741.539	806.457	642.002	2016.58	1040.89	1316.13	759.327	985.125	811.097	426.217	840.051	586.8	1644.18
SLAMF7	2540.36	1903.36	2823.88	2077.17	2789.1	1912.6	2840.18	1719.34	1192.4	1178.55	2133.98	4105.63	1458.56	7226.16	3175.08	2051.48	3857.94	1090.15	3416.95	3496.1	1724.74	2400.88	1327.63	1660.02	2388.3	2271.32
BTN3A1	7801.05	7453.95	8684.33	6980.71	5631.86	8183.13	7084.72	9537.06	9289.64	9319.39	9480.46	9081.83	7168.94	8331.75	8003.68	7205.27	8781.88	6862.14	7204.5	10453.6	6074.42	9909.6	6377.37	7327.3	7028.23	6706.71
MIPEP	187.493	184.038	145.258	148.193	157.401	164.775	186.109	153.544	152.097	169.024	207.385	191.038	163.129	244.938	229.757	255.128	161.578	150.993	215.19	201.835	153.446	207.05	303.117	147.26	191.147	123.661
PRKCH	5480.82	4568.23	4439.01	4112.36	6560.76	4545.96	6656.76	3883.7	3505.06	5549.15	5876.49	5583.66	4353.88	5737.32	4547.17	5139.15	5173.65	4083.23	5828.59	5601.59	3849.45	4301.24	5468.02	3108.08	4967.76	6037.93
INSRR	0.837022	4.08974	6.91703	3.29318	1.19243	6.06532	5.39446	0	4.87492	5.54176	0.871366	2.51365	1.74469	5.76326	0	4.18242	1.04921	2.14174	6.5209	2.66742	5.11487	0.900218	0	2.23121	1.02767	8.83292
IFNGR1	2870.99	3391.21	4202.1	3433.96	6947.11	2673.8	2421.21	4960.24	5270.76	2947.29	2495.59	3800.64	4151.5	2215.97	2426.75	2093.3	8511.18	4076.8	3483.25	2820.36	3915.95	2939.21	2890.86	4731.28	4513.53	7227.85
B4GALT7	538.205	588.104	609.564	568.073	792.967	853.189	805.572	726.08	781.936	713.963	640.454	1022.22	803.431	758.829	769.549	709.966	659.952	801.011	652.09	707.756	739.611	777.788	476.516	461.861	478.894	593.067
SH2D2A	1012.8	615.096	1297.81	737.672	1147.12	1156.45	1330.63	787.671	575.24	625.295	825.184	940.107	483.28	1004.73	835.062	695.328	1785.75	835.279	1405.25	953.159	693.577	773.287	526.815	475.248	593.993	1319.89
VRK2	497.191	431.058	431.45	498.093	540.172	537.792	660.821	731.284	681.513	401.777	510.62	764.989	858.389	616.668	680.045	685.917	1168.82	445.482	946.617	621.51	749.841	699.47	749.189	843.398	719.369	779.82
TNFRSF1B	17028.4	14417.1	20537.5	15919.2	23716.3	20987	15492	20053.5	15090.8	11907.4	11439.3	16752.7	17127.7	13919.2	15939.1	9392.68	22581.1	18346.2	22448.2	20645.9	30807.9	15865.4	8066.36	22814.1	21106.3	15386.9
VEZT	693.054	837.578	1017.67	1038.17	674.917	870.374	681.5	798.948	785.836	580.037	808.628	943.458	706.601	998.965	917.184	660.823	862.45	804.224	852.064	960.273	715.059	709.372	795.517	856.785	916.682	779.82
POU2F2	2804.86	2756.48	2525.58	2792.61	5007.02	5948.06	4947.62	6257.99	5593.48	4677.24	5544.5	5545.96	5856.93	4800.79	7309.79	5095.24	3994.34	5426.1	6927.37	8385.49	8339.29	5878.42	2035.78	3197.33	2800.4	1618.95
BRD9	1847.31	2306.61	2057.82	1979.2	1816.07	1805.44	1925.82	1671.63	1753.99	2119.72	1952.73	1794.75	1810.12	1750.11	1783.62	1921.82	1581.16	1795.85	1663.92	1668.92	1677.68	1761.73	1732.67	1569.66	1759.37	1661.85
SNX1	4334.1	4630.4	5347.73	5036.92	2383.67	3997.05	3662.84	4596.77	4885.64	3654.79	3368.7	4709.75	3847.05	3977.61	4358.93	3459.91	4802.23	4114.28	3650.62	4389.69	4176.81	3002.23	2822.03	4021.76	3055.26	3179.85
TBPL1	513.095	451.507	481.598	455.282	722.614	540.825	590.693	476.246	456.292	447.959	586.429	671.146	405.641	605.142	546.25	588.676	684.084	515.089	581.447	611.729	615.831	516.725	675.064	514.294	486.088	522.404
ARNTL2	70.3099	44.1691	38.0437	54.3374	57.2367	52.5661	63.8344	56.3861	49.7241	43.4104	58.3815	166.739	96.8305	121.989	64.5904	105.606	69.2478	76.0318	116.289	50.6811	70.5853	105.326	54.2699	108.214	120.237	84.5436
BCLAF1	8715.07	7878.47	7349.35	8027.94	12521.7	7531.11	10478.7	8209.82	7988.04	11478.8	9629.47	6639.4	10982	8521.94	8246.35	11300.9	8192.22	9585.36	10022.6	7948.03	10192.9	10040.1	11821.6	9174.74	9908.79	11797
SLC39A9	1318.31	1190.93	1379.95	1271.17	1658.67	1602.26	1413.35	1610.91	1537.55	1416.84	1500.49	1565.17	1470.78	1923.97	1630.45	1427.25	1750.08	1710.18	1719.34	1476.86	1817.83	1569.98	1524.85	1632.13	1728.54	1660.59
ANK1	125.553	233.115	186.76	249.458	358.922	194.09	924.25	392.1	235.946	315.88	839.997	296.611	160.512	252.623	577.623	916.996	239.22	357.671	305.395	815.343	782.576	563.537	525.491	273.323	790.278	194.324
IBSP	0	0	0	0	0	0	0.899076	0	0	0	0	0	0	0	0	0	0	0	0	0	0	0	0	0	0	0
TFB1M	177.449	168.497	156.498	186.888	103.742	159.72	201.393	151.809	156.972	196.732	124.605	186.01	181.448	195.951	198.385	164.16	130.102	158.489	127.157	163.602	144.239	143.135	178.693	171.803	181.898	128.708
RABEP1	1865.72	1553.28	1643.66	1706.69	1960.36	1694.25	2164.98	1892.84	2088.41	1886.04	2586.21	2225.42	1809.25	2020.02	2289.27	2724.85	1976.71	1714.46	2205.15	2429.13	1776.91	2328.86	3420.33	1874.22	1831.31	1947.03
HMGB3	76.169	79.3409	102.891	116.908	209.868	142.535	121.375	100.628	76.0487	136.697	154.232	121.493	173.597	333.308	164.244	141.157	107.019	138.142	155.415	105.808	196.411	150.336	105.892	214.196	172.649	266.249
NUP160	1880.79	1683.34	1679.97	1765.14	1373.68	1563.84	1722.63	1682.04	2063.06	1732.72	1798.5	1601.2	1784.82	1701.12	1693.19	1893.59	1325.15	1570.97	1460.68	1619.13	1256.21	1773.43	2353.46	1314.18	1626.8	1635.35
BAK1	722.35	898.106	836.096	778.013	1104.19	1083.67	1155.31	1154.61	893.085	978.12	844.354	1355.7	1158.48	1924.93	1208.76	1217.09	1323.05	817.074	1275.92	859.8	1032.18	1091.06	1009.95	860.132	812.887	941.337
MUSK	0.837022	0	0	0	1.19243	2.02177	0	0	2.92495	0	0	2.51365	0	2.88163	0	0	1.04921	0	0	0	1.02297	0.900218	0	0	1.02767	0
IKZF2	1690.78	1434.68	1348.82	1709.98	1160.24	1551.71	2003.14	1166.76	1199.23	1919.3	3049.78	2066.22	961.326	2254.39	2316.03	2445.67	1894.87	1214.37	1540.02	2134.83	2054.13	2651.14	2652.61	2095.11	2793.21	2025.26
GRN	10423.4	13630.3	22262.5	17383	23134.4	18579.1	14902.2	24670.2	21104.5	14285.7	8691.88	27842.1	18238.1	11467.9	14268	10480.1	33273.6	23921.1	22291.7	14704.6	23621.5	22542.4	5368.75	41158	21014.8	28448.3
FAM13B	1950.26	1531.2	1662.68	1588.13	1963.94	1560.81	1825.12	1636.93	1640.9	1455.64	1942.27	1766.26	1736.84	1735.7	1758.7	1679.24	1947.33	1694.12	2047.56	2053.03	1953.88	1704.11	2194.62	1737	2129.33	2013.91
ARHGAP31	887.244	1086.23	1201.83	1211.07	1581.17	1108.94	846.031	1468.64	1261.63	826.646	745.018	1412.67	1366.97	999.925	1001.15	714.149	1752.18	1594.53	1336.78	1217.23	1294.06	1289.11	397.097	1305.26	1073.92	1042.28
NR2E3	1.67404	2.45384	0	2.46988	1.19243	0	0	0.867479	3.89993	1.84725	1.74273	0.837885	0.872347	0	3.69088	4.18242	0	2.14174	4.34726	3.55657	1.02297	0.900218	1.32366	0	4.11068	1.26185
CENPQ	98.7686	112.877	120.183	100.442	41.7351	74.8056	79.1187	88.4828	94.5734	62.8066	70.5806	134.062	82.8729	92.2121	128.258	76.3292	112.265	62.1105	61.9485	103.14	39.896	63.9155	107.216	70.2832	93.518	52.9975
SARS	2776.4	3036.22	3347.84	2983.62	2395.6	2618.2	2258.48	2206.87	2058.19	2116.95	2263.81	2432.38	2277.7	2458.03	2693.42	2320.2	2492.92	2603.29	2434.47	2474.48	2206.56	2351.37	2344.19	2873.8	2704.83	2381.1
RANBP3	1844.8	1854.29	1814.86	1731.39	1880.47	1914.62	2049.89	1911.06	2031.86	2022.74	2082.56	2033.55	1953.18	2110.31	2126.87	2051.48	2154.03	1965.05	2013.87	2096.6	1933.42	2188.43	1560.59	1699.07	1611.39	1624
ARID4A	2011.36	1743.86	1633.28	1551.91	2235.81	1785.23	2189.25	1871.15	1971.42	2178.83	2045.1	1722.69	2148.59	1773.16	2122.26	2100.62	1992.45	1894.37	2366	1908.1	2060.27	2272.15	2681.73	2025.94	2465.38	2311.7
TSSC1	636.974	647.814	599.188	632.29	580.715	548.912	534.051	466.704	465.067	544.016	599.5	613.332	544.344	696.394	656.977	579.266	496.276	550.427	537.974	578.831	514.556	623.851	614.176	539.953	728.618	570.354
PNPLA6	3197.42	3335.59	4126.87	3265.19	4729.19	4314.47	3843.55	4051.13	3852.16	4010.39	3037.58	4176.02	4115.73	3263.92	4055.36	3079.31	5082.37	3897.97	4866.76	3761.96	5379.82	3637.78	1952.39	4144.48	3537.24	3193.73
IFT88	374.149	338.63	259.389	345.784	379.193	277.994	339.851	281.063	318.819	332.505	375.559	287.394	273.917	265.11	329.411	333.548	217.186	337.324	297.788	280.079	299.732	328.58	307.088	233.162	339.131	280.13
ALG1	285.425	283.828	302.62	280.743	306.455	281.027	305.686	273.256	232.046	235.525	264.024	347.722	240.768	426.481	387.542	296.952	385.06	255.938	327.132	291.638	244.491	288.97	236.934	315.716	329.882	286.439
ZCCHC8	915.702	953.726	1061.76	1036.53	1188.85	1090.75	953.021	1037.5	1053.96	989.204	904.478	1137.85	908.985	1027.78	1074.05	931.635	1078.59	958.429	1024.87	1067.86	1037.3	1082.06	988.771	1006.28	938.263	953.955
ABCF2	1337.56	1488.66	1480.25	1307.39	924.135	1277.76	1100.47	1074.81	975.958	868.209	1056.97	1280.29	934.283	1212.21	1397	1225.45	1243.31	1119.06	1043.34	1135.43	855.207	1040.65	1129.08	1176.96	1270.2	904.743
CHPF2	2417.32	2331.15	2827.34	2211.37	3126.56	2760.73	2495.84	2544.31	2226.86	2353.4	2330.9	2666.15	2150.33	2793.26	2805.07	2376.66	3158.12	2869.93	2663.79	2299.32	3050.51	2557.52	1719.43	2757.78	2306.09	2426.53
LRRC7	38.503	78.5229	49.2839	70.8033	83.4703	90.9798	85.4123	111.905	150.147	121.919	70.5806	67.8687	128.235	73.9618	56.2859	144.294	57.7065	71.7483	76.0771	78.2444	70.5853	93.6227	109.863	27.8901	50.3558	73.187
FUT8	382.519	251.11	287.921	304.619	574.752	312.364	506.18	289.738	339.294	472.897	578.587	516.975	365.513	1099.82	863.666	789.432	392.404	353.387	569.492	514.813	414.305	678.764	713.45	330.219	670.041	524.928
UBA6	957.553	947.183	1130.07	1119.68	1104.19	1168.59	1290.17	1253.51	1384.48	961.495	1299.21	1732.75	1247.46	1534.95	1462.51	1320.6	1368.17	1079.44	1374.82	1517.76	1185.63	1207.19	1092.02	1008.51	1356.52	1086.45
GAB2	1453.07	1487.85	2222.1	1795.61	3489.06	2887.09	1418.74	3292.08	2854.75	2322.92	1815.93	1852.56	2718.23	1605.07	2066.89	1663.56	4245.1	3133.37	3101.77	2314.43	4119.52	2404.48	1201.88	3212.94	1934.07	4209.52
ATP6V0A1	723.187	994.624	1187.14	1061.23	1049.34	960.343	648.234	1298.62	1430.3	894.994	847.839	1060.76	1097.41	924.042	1023.3	868.898	1140.49	1161.89	862.932	868.691	1355.44	963.233	690.948	1330.92	870.436	1044.81
PIAS1	1586.16	1361.88	1721.48	1462.99	1957.97	1831.73	1844.9	2211.2	2473.53	1904.52	1917.01	1899.48	2146.84	1958.55	1885.12	2122.58	2236.91	2049.65	1986.7	2160.61	2057.2	2180.33	1827.97	1684.56	1689.49	2037.88
SLC4A7	1356.81	1365.15	1264.09	1436.65	1496.5	1401.09	2174.87	1753.17	2219.06	2007.96	2097.38	2307.53	1847.63	2422.49	1933.1	2118.4	1195.05	1630.94	1499.81	2103.71	1636.76	1570.88	1748.55	1018.55	1705.93	1335.03
APBA2	3555.67	2179.83	1887.49	2317.57	2116.57	2149.15	3265.45	2205.13	2305.84	4065.8	2000.66	1540.03	2426	2764.44	1635.06	3557.15	2711.16	1716.61	1394.39	1051.85	635.267	2240.64	2659.22	1407.89	905.377	1902.86
UHRF1	190.004	134.143	137.476	137.49	156.209	217.341	391.997	211.665	283.72	231.83	420.87	502.731	472.812	768.434	348.788	361.78	318.959	224.883	213.016	356.546	181.067	341.183	131.042	194.115	227.115	157.731
MAP2K3	2367.1	2187.19	2852.41	2498.7	5283.67	3723.1	4447.73	4038.98	3043.9	3748.08	3284.18	3328.92	3553.94	3186.12	3618.91	3556.1	4522.09	3750.19	4671.14	3697.05	6085.68	3942.06	2002.69	3550.97	2432.49	2633.47
EFCAB1	0	2.45384	0	0	2.38486	0	0	0	0	0	0	0	0	0	0.92272	0	1.04921	0	0	0	0	0	0	1.11561	0	0
TMSB10	23391.4	25368.6	24852.9	23238.3	19536.8	16899	16701.2	15063.8	13910.1	16391.6	15828.4	19063.6	18704	16254.3	18572.5	16563.4	16973.1	19710.4	18409.6	15452.4	18272.4	17584	29978.1	35220.8	32292.5	27930.9
ASTE1	279.565	277.284	296.568	294.739	253.988	234.526	246.347	216.87	253.496	285.401	268.381	228.743	200.64	244.938	270.357	382.692	202.497	209.891	280.399	247.181	245.514	261.963	333.561	177.381	258.973	294.01
RNF19A	2501.86	1749.59	2206.53	1779.14	2908.34	1633.59	3020	2081.95	2011.39	2612.02	3358.24	2888.19	1942.72	2701.05	2433.21	3225.69	1828.77	1689.83	3249.58	2555.39	2458.21	2211.84	3883.61	2041.56	3188.86	4103.52
PEX3	274.543	219.21	228.262	203.354	149.054	307.31	290.402	239.424	307.12	237.372	313.692	248.014	277.406	275.676	311.879	264.538	204.596	208.82	240.186	280.969	179.021	257.462	275.32	236.508	245.613	174.135
GABARAPL2	1431.31	1662.89	1590.92	1432.53	1199.59	1324.26	1646.21	1473.85	1221.65	1620.96	1795.89	1535	1421.92	1457.14	1406.23	1683.43	1382.86	1604.16	1586.75	1452.86	1727.8	1195.49	1985.48	1774.93	1715.18	1555.86
MYOC	0	0	0	0	0	0	0	0	0	0	0.871366	0	0.872347	0	0	0	0	0	0	0	1.02297	0	0	0	0	0
SH3YL1	1030.37	1433.04	1000.38	1042.29	854.974	1423.33	1300.06	990.661	1202.15	1740.11	1679.99	997.083	1607.73	842.396	1328.72	2093.3	681.986	1778.72	723.82	1259.91	905.333	1145.98	2295.22	1286.29	1211.62	937.551
FAM136A	1124.12	912.829	897.485	776.367	911.018	805.677	830.747	908.25	796.561	897.765	797.3	963.567	807.793	971.109	807.38	828.12	867.696	719.625	917.273	705.089	695.623	802.995	847.139	971.693	778.974	875.721
VCL	3178.17	3744.56	6466.56	5386.82	7080.66	5331.42	4032.36	7723.16	6303.27	3934.65	6612.8	6098.96	4048.56	5270.5	5077.73	3173.41	8668.56	5120.9	7752.26	6258.67	10268.6	4733.35	1748.55	4548.32	4656.37	3679.54
DEPDC1B	37.666	26.9923	31.9913	26.3454	10.7319	20.2177	57.5409	7.80731	10.7248	37.8687	60.9956	109.763	66.2983	236.294	94.1175	75.2836	48.2636	11.7796	58.6881	46.2353	21.4825	48.6118	47.6516	63.5895	102.767	66.8778
DAPK2	80.3541	166.043	177.249	111.145	184.827	215.319	122.274	247.231	178.422	244.761	169.045	248.852	111.66	272.794	159.631	171.479	256.007	236.662	149.981	183.163	197.434	132.332	124.424	197.462	81.1859	190.539
NSMAF	1668.19	2030.96	1729.26	1717.39	1626.48	1874.18	1605.75	1829.51	1831.99	1504.59	1521.4	1872.67	1709.8	1663.66	1742.1	1543.31	1801.49	2026.09	1573.71	1568.45	1406.59	1718.52	1690.31	2030.4	1779.92	1794.34
ADSS	1805.46	1585.18	1834.74	1425.12	1418.99	1623.48	1588.67	1631.73	1617.5	1190.55	1441.24	1683.31	1491.71	1461.95	1617.53	1466.98	2188.65	1681.27	1461.77	1617.35	1713.48	1409.74	1542.06	1888.72	1825.14	1644.18
STAP1	392.563	365.622	333.747	372.129	344.613	324.495	424.364	593.355	767.312	230.907	612.57	470.053	293.981	311.216	938.406	889.81	288.532	297.702	341.26	417.896	272.111	667.962	1314.39	459.63	360.712	282.653
TIMP2	1581.13	2021.97	2916.39	2511.05	3712.04	2816.33	1265	3610.45	3278.87	1895.28	1691.32	2865.57	2853.45	1943.18	2194.23	1286.1	4581.89	3164.42	2623.57	2304.65	3929.25	2345.97	794.193	3900.16	2184.83	2736.94
RFC1	1332.54	1204.84	1398.11	1304.92	1674.17	1292.92	1516.74	1453.89	1314.28	1417.77	1463.02	1448.7	1597.27	1848.08	1689.5	1572.59	1636.77	1225.08	1519.37	1523.1	1275.65	1584.38	1837.23	1433.55	1586.72	1694.66
TBC1D23	810.237	751.693	955.415	842.23	734.538	785.459	715.665	827.575	857.01	762.915	776.387	996.245	872.347	876.015	826.757	725.65	1161.47	730.334	910.752	954.938	857.253	812.897	870.965	776.462	956.761	885.816
CUL3	1607.92	1631.8	2072.52	1703.4	2276.35	2218.9	1897.05	1920.6	2084.51	1835.25	2059.04	2247.21	2029.08	2245.75	2374.16	1913.46	2226.42	1963.98	1878.02	2184.62	1971.27	2067.8	2068.87	1656.67	1744.98	1637.88
MYOM2	4816.23	348.445	260.253	64.217	3399.62	113.219	44.9538	36.4341	20.4746	1342.95	656.139	28.4881	70.6601	146.003	645.904	267.675	61.9033	28.9135	3070.26	39.1222	735.519	182.744	219.727	1394.51	149.012	1075.09
OTC	0	0	0	0	0	0	0	0	0	0	0	0	0	0	0	0	0	0	0	0	0	0	0	0	0	0
CYP46A1	25.9477	16.3589	12.1048	13.996	13.1168	32.3484	7.19261	25.1569	21.4496	22.167	20.9128	9.21673	17.4469	8.64489	4.6136	12.5473	3.14763	27.8426	7.60771	8.00227	15.3446	9.00218	3.97097	14.5029	5.13835	27.7606
ZZZ3	1571.09	1321.8	1151.69	1163.32	1372.49	1403.11	1589.57	1264.78	1314.28	1600.64	1564.97	1180.58	1416.69	1364.93	1523.41	1702.25	1141.54	1429.61	1331.35	1334.6	1038.32	1490.76	2169.47	1483.76	1628.86	1444.81
SLC18A1	32.6439	17.1769	6.91703	20.5824	3.5773	56.6097	1.79815	13.8797	12.6748	10.1599	4.35683	2.51365	41.0003	11.5265	10.1499	4.18242	8.39367	9.63783	5.43408	3.55657	8.1838	5.40131	1.32366	18.9653	3.08301	2.52369
USP2	5.02213	0.817947	4.32315	4.11647	11.9243	12.1306	7.19261	6.93983	4.87492	15.7016	6.97093	2.51365	4.36173	1.92109	7.38176	9.41045	5.24604	10.7087	24.9968	1.77828	5.11487	6.30153	11.9129	10.0405	5.13835	7.57107
CASR	0	1.63589	0.864629	0.823294	2.38486	1.01089	0.899076	0.867479	0.974983	2.77088	0.871366	0	0	2.88163	0.92272	2.09121	4.19684	0	3.26045	0	0	0.900218	0	1.11561	0	2.52369
TUBG2	298.817	343.538	265.441	293.093	267.105	326.516	369.52	309.69	318.819	363.909	243.111	319.234	296.598	293.926	289.734	289.633	250.761	326.615	298.874	319.202	251.652	258.363	223.698	256.589	264.111	246.06
RPL26L1	159.871	175.041	170.332	173.715	196.751	171.851	161.834	166.556	116.023	132.079	141.161	211.985	158.767	251.662	190.08	134.883	205.645	178.835	186.932	186.72	179.021	173.742	160.162	229.815	246.641	264.988
FLT4	209.256	305.912	325.965	512.089	418.544	604.51	151.045	299.28	269.095	486.751	247.468	25.9744	211.98	87.4094	236.216	560.445	116.462	457.262	154.328	178.717	105.366	526.628	386.507	113.792	238.419	225.87
NSUN2	1904.23	1826.48	2285.21	1965.2	2271.58	2149.15	2028.32	2073.27	2072.81	2059.69	1984.1	2568.12	2098.87	2343.72	2218.22	1847.59	2600.99	1840.83	1910.62	2582.96	2006.05	2088.51	1850.47	2292.57	1837.47	1902.86
FBXO42	1270.6	961.088	1111.91	1005.24	1674.17	1148.37	1260.51	1372.35	1304.53	1341.11	1353.23	1038.14	1473.39	1360.13	1260.44	1362.42	1643.06	1364.29	1632.4	1392.4	1620.39	1540.27	1258.8	1144.61	1263.01	1365.32
MFAP3	685.521	652.722	653.66	608.415	889.554	622.706	526.859	658.416	548.916	573.572	590.786	630.927	621.111	673.341	546.25	579.266	777.464	582.554	626.006	610.84	653.681	624.751	696.243	574.537	687.511	850.484
MRI1	560.805	678.896	610.428	540.904	568.79	778.383	604.179	631.524	620.089	689.025	587.301	522.002	809.538	583.05	675.431	622.135	506.768	674.648	546.668	614.397	503.304	529.328	410.333	506.485	379.21	492.12
METTL1	103.791	94.8819	67.4411	70.8033	106.126	79.8601	65.6326	50.3138	71.1738	68.3483	74.0661	55.3004	65.426	68.1985	96.8856	83.6485	50.362	55.6853	54.3408	57.7942	67.5163	63.9155	131.042	76.9768	99.684	69.4015
HOXC8	0	0	0	0	0	0	0	0	0	0	0	0	0	0	0	0	0	0	0	0	0	0	0	0	0	0
AGA	698.076	673.17	625.127	591.949	523.478	539.814	487.299	557.789	494.316	447.959	494.064	510.272	630.707	713.683	595.155	597.041	628.476	772.098	501.022	512.145	521.717	472.615	628.736	802.121	765.614	792.439
PI4K2B	820.282	666.627	747.04	743.435	518.708	838.025	790.288	1008.01	923.309	661.316	1270.45	1468.81	912.474	1054.68	1342.56	1147.03	1103.77	632.884	1165.07	1251.91	896.126	1059.56	1178.05	1130.11	1363.72	646.065
BOD1L1	3461.92	3576.06	3724.82	3965.81	4012.53	3448.14	3952.34	4457.97	5006.54	4618.13	4535.46	4057.88	4586.8	4265.77	4055.36	4138.51	5238.7	4239.58	3927.75	4846.71	4205.45	4289.54	3720.8	3528.66	3744.83	4171.66
MAT2B	4205.2	4243.51	4512.5	4319.83	2321.67	3500.7	3323.89	3587.89	3309.09	2527.97	3774.76	4057.88	2979.94	3766.29	4377.38	3403.45	4554.62	3308.99	3647.35	3970.9	2908.32	3005.83	4172.16	3981.6	4540.25	3266.92
TLL1	0	0	0	0	0	0	0	0	0	0	0	0	0	1.92109	0	0	0	0	0	0	2.04595	0	0	0	0	0
EDC4	2123.53	2303.34	2471.97	2161.97	2346.71	2509.02	2529.1	2258.91	2050.39	2603.7	2067.75	2165.93	2234.08	2383.11	2350.17	2405.94	1943.13	2420.17	2320.35	2279.76	2165.64	2450.39	1700.9	1886.49	1883.72	1973.53
TRIO	1920.97	1819.11	1932.45	2291.23	3068.13	2107.7	1485.27	3512.42	3836.56	1782.6	2504.31	1886.92	2477.46	2127.6	2810.61	1833.99	1822.48	1897.58	2130.16	2309.99	2920.59	2473.8	1387.19	1849.67	2065.62	1994.98
VCAN	14740.8	18899.5	40763.8	37964.6	48071.7	41152.2	30905.7	65890.2	74175.7	20781.6	21561.1	38661.7	36389.1	23563.1	26012.4	13687	62195	54877.8	32365.4	28131.5	50885.8	38126.9	4758.54	44860.7	32843.3	90596.7
CLEC16A	1309.94	1095.23	1379.08	1318.09	1348.64	1373.8	1411.55	1460.83	1366.93	1281.07	1578.92	1473.84	1289.33	1435.05	1528.02	1552.72	1430.07	1362.15	1426.99	1573.78	1339.07	1573.58	1425.58	1174.73	1281.5	1280.77
MSR1	112.998	318.999	203.188	104.558	329.111	87.9472	217.576	497.065	391.943	114.53	60.1243	190.2	514.684	81.6461	41.5224	51.2347	1926.35	266.647	1313.96	143.152	761.093	356.486	26.4731	612.468	466.562	431.551
CDH1	70.3099	52.3486	34.5852	95.5022	41.7351	43.4681	12.5871	9.54227	5.8499	24.0143	27.0123	30.1638	11.3405	36.5006	27.6816	27.1857	10.4921	40.6931	32.6045	24.896	34.7811	32.4079	27.7968	47.971	175.732	18.9277
SKIV2L2	1254.7	1062.51	1448.25	1205.3	934.867	990.669	1036.64	1091.29	1060.78	893.147	1219.91	1139.52	897.645	1449.46	1261.36	1156.44	1256.95	990.555	1121.59	1408.4	993.309	1004.64	1219.09	1057.59	1244.51	1179.83
DNAH5	0	0	0	0.823294	0	0	0	0	0.974983	0	0	0	0	0.960543	0	0	1.04921	0	1.08682	0	0	1.80044	0	0	0	0
ZFYVE16	853.763	820.401	1178.49	1248.11	832.318	1151.4	977.296	1227.48	1454.67	1017.84	1043.9	1252.64	1235.24	1186.27	1019.61	965.094	1602.14	1207.94	1120.51	1258.13	1189.72	996.542	906.704	1033.05	823.164	1047.33
FAM65A	1224.56	1617.08	1672.19	1498.4	1832.77	1799.38	1205.66	1596.16	1550.22	1426.08	1389.83	1478.03	1376.56	986.477	1627.68	1521.36	1621.03	1651.28	1672.61	1477.75	2511.4	1726.62	1199.23	1865.29	995.812	995.596
C6	0	0	0	0	0	0	0	0	0	0	0	0	0	0	0	0	0	0	0	0	0	0	0	0	0	0
RAI14	12.5553	13.0872	35.4498	27.992	13.1168	14.1524	9.88984	12.1447	8.77485	36.0214	8.71366	9.21673	3.48939	1.92109	12.9181	8.36485	2.09842	18.2048	10.8682	16.8937	29.6663	10.8026	13.2366	5.57803	16.4427	10.0948
SOX30	13.3924	22.9025	12.1048	14.8193	19.0789	19.2069	14.3852	19.0845	19.4997	17.5489	31.3692	15.9198	9.59581	26.8952	17.5317	47.0523	6.29525	28.9135	27.1704	22.2285	0	13.5033	39.7097	20.0809	9.24903	6.30923
PNKP	1515.85	1603.99	1562.38	1421.83	1857.81	1913.61	1738.81	1741.03	1677.95	1770.59	1810.7	1617.96	1676.65	1801.02	1797.46	1637.42	1672.44	1824.76	1753.03	1747.16	1614.25	1750.92	1044.36	1029.7	1149.96	1322.41
BEST2	2.51107	0	0.864629	2.46988	0	0	3.59631	6.07235	1.94997	1.84725	4.35683	4.18942	0.872347	1.92109	0	5.22803	6.29525	2.14174	4.34726	3.55657	4.0919	3.60087	0	0	0	0
PHLPP2	570.012	444.145	453.066	577.953	668.955	572.162	846.93	574.271	567.44	658.546	790.329	517.813	694.388	654.13	664.359	722.514	516.211	676.79	659.697	745.1	782.576	734.578	915.97	402.734	618.657	453.003
SPDL1	228.507	328.815	198.865	234.639	156.209	221.384	255.338	209.93	188.172	247.532	245.725	310.855	326.258	351.559	244.521	242.581	217.186	203.465	244.534	184.052	142.193	184.545	223.698	189.653	213.755	138.803
STAU2	613.537	458.05	562.874	572.19	814.431	583.282	574.51	675.766	585.965	629.913	763.317	635.117	633.324	727.131	663.436	676.507	929.599	641.451	743.382	739.766	692.554	746.281	688.301	533.26	638.183	729.347
PQLC2	224.322	224.935	245.555	222.29	399.465	364.93	356.034	322.702	349.044	334.353	280.58	281.529	318.406	292.966	317.416	289.633	364.075	351.246	341.26	360.102	414.305	348.384	153.544	297.867	209.645	281.392
CTNS	375.823	325.543	470.358	427.29	490.09	386.159	345.245	403.378	415.343	358.367	380.787	742.366	400.407	413.994	503.805	313.682	456.406	330.899	302.135	618.842	532.97	367.289	206.49	384.884	296.997	324.294
RTN4R	39.34	27.8102	31.9913	32.1085	44.12	52.5661	52.1464	58.9885	28.2745	32.3269	78.4229	47.7594	42.745	46.1061	52.5951	15.6841	40.9191	32.1261	79.3376	140.484	36.8271	36.0087	17.2075	12.2717	32.8854	15.1421
PHF23	404.282	459.686	693.433	586.186	231.332	517.574	326.365	472.776	454.342	334.353	424.355	682.876	305.321	446.652	549.019	350.278	650.509	488.317	552.103	573.496	473.637	413.2	250.171	466.323	383.321	352.055
CDH10	0.837022	0.817947	0	1.64659	0	0	0	0	0	0	0	0	0	0	0	0	2.09842	0	0	0	0	0	0	1.11561	0	0
INPP4A	6246.7	5154.7	5565.62	5628.04	4768.54	5322.32	5130.13	5374.9	5345.83	5302.54	4680.11	5888.65	4674.91	6223.36	5029.75	4932.12	6571.19	4926	4898.28	5611.37	4922.55	5016.92	4391.89	4169.02	4712.89	5013.31
RAB27B	340.668	243.748	432.315	518.676	376.809	450.856	252.64	437.209	260.32	305.72	487.965	425.645	232.917	405.349	320.184	222.714	736.545	170.268	656.437	428.566	692.554	309.675	136.337	159.532	200.396	306.628
PSMA4	2177.93	2142.2	2175.41	2218.78	2134.45	1984.37	1986.06	1963.1	1706.22	1344.8	1734.89	2644.36	2488.8	2384.07	1974.62	1996.06	2862.24	1774.43	2695.3	2059.25	2371.26	1976.88	2154.91	3318.93	3142.61	2272.58
MYO16	4.18511	15.541	4.32315	28.8153	29.8108	2.02177	4.49538	2.60244	8.77485	2.77088	5.2282	5.86519	2.61704	21.1319	4.6136	4.18242	0	52.4727	4.34726	11.5588	3.06892	23.4057	15.8839	2.23121	25.6917	32.808
LSG1	1128.31	1505.02	1121.42	1539.56	1348.64	1063.45	1148.12	1368.01	1428.35	1087.11	1159.79	955.188	1163.71	1142.09	1073.12	1253.68	923.304	1410.34	1033.56	1056.3	1060.82	1470.06	1135.7	932.646	1024.59	1025.88
PARP3	325.602	467.048	332.882	382.009	354.152	427.605	387.502	385.161	343.194	373.145	387.758	458.323	404.769	439.929	419.838	507.119	507.817	301.985	466.244	459.686	322.237	423.103	475.192	375.959	492.254	311.676
TNC	1.67404	4.08974	2.59389	3.29318	2.38486	12.1306	14.3852	12.1447	12.6748	5.54176	4.35683	20.1092	8.72347	8.64489	2.76816	5.22803	7.34446	10.7087	4.34726	4.44571	3.06892	6.30153	0	2.23121	2.05534	3.78554
THAP3	267.847	310.82	305.214	296.386	212.253	318.429	249.943	258.509	215.471	291.866	220.456	309.179	207.618	229.57	310.957	227.942	260.204	282.71	286.919	261.408	216.871	228.655	225.021	269.977	196.285	215.776
FAM65C	26.7847	27.8102	21.6157	83.976	109.704	85.9254	176.219	98.8926	152.097	147.78	105.435	121.493	127.363	99.8965	102.422	108.743	99.6748	83.5279	126.071	99.5838	171.86	139.534	76.772	27.8901	49.3282	41.6409
TDP1	851.252	743.514	748.769	780.483	683.264	706.61	844.233	654.946	652.264	668.705	955.888	713.04	744.984	873.133	966.088	1021.56	604.344	594.333	792.289	723.761	615.831	864.209	1117.17	689.444	835.496	797.486
AIFM2	131.412	158.682	140.07	120.201	183.635	148.6	165.43	144.869	166.722	144.086	180.373	166.739	102.937	282.4	201.153	202.848	117.511	129.575	153.241	165.38	130.941	169.241	157.515	148.376	175.732	136.279
C2orf83	1.67404	0	0	0.823294	0	0	0	0	0	0	0	0	0	0	0	0	0	0	0	0	0	0	0	0	0	0
SPATA7	67.7988	73.6152	88.1922	52.6908	71.5459	65.7077	50.3483	85.0129	66.2989	88.6681	31.3692	62.0035	107.299	52.8299	57.2087	47.0523	89.1827	85.6696	70.643	76.4661	58.3096	60.3146	59.5645	81.4392	94.5456	52.9975
MED17	718.165	692.801	768.655	719.559	1196.01	838.025	924.25	785.936	664.938	969.808	871.366	748.231	762.431	803.014	856.284	1119.84	766.972	828.854	962.919	714.87	837.816	974.036	1256.15	735.184	805.693	990.549
RETSAT	826.141	874.385	1060.04	950.905	783.428	842.069	869.407	936.877	889.185	856.202	812.113	1106.01	707.473	1009.53	938.406	858.442	998.847	852.413	794.463	988.725	856.23	851.606	622.118	678.288	838.579	861.84
CAPG	1877.44	3239.07	3506.94	3269.3	3424.67	2766.8	2159.58	3302.49	2846.95	2103.1	1865.59	2941.81	2494.04	1834.64	2016.14	1772.3	3468.68	4292.05	3202.85	2277.09	3300.12	1836.45	1706.19	6827.51	4676.93	4789.97
AP2S1	942.487	1186.84	1258.04	1114.74	1808.92	1258.55	1098.67	1375.82	1057.86	1067.71	860.91	1390.05	1403.61	1046.03	1153.4	817.664	1536.04	1657.71	1526.98	1153.22	1726.78	1168.48	652.562	1675.64	1345.22	1303.49
USH2A	0	1.63589	0	1.64659	0	0	0	0	0.974983	0	0.871366	0	0.872347	0	0	1.04561	0	1.07087	1.08682	0	0	0	0	1.11561	0	0
ZPBP	0	0	0	0	0	0	0	0	0	0	0	0	0	0	0	1.04561	0	0	1.08682	0	0	0.900218	2.64731	0	0	0
TG	79.5171	72.7973	42.3668	60.9238	114.473	86.9363	75.5224	67.6633	95.5483	131.155	64.4811	100.546	95.0858	114.305	80.2767	92.0133	142.692	106.016	94.553	58.6833	80.815	109.827	71.4774	59.1271	54.4665	122.399
ADAM28	821.119	1090.32	752.227	1090.04	1749.3	1042.22	1339.62	2277.13	3265.22	907.925	3159.57	670.308	857.517	962.464	1835.29	2390.25	599.098	1237.93	1751.95	1700.04	990.24	1470.96	2157.56	596.849	926.958	659.945
BARX2	0.837022	0	0	0	1.19243	1.01089	0.899076	0	0	0.923626	5.2282	0.837885	0	3.84217	1.84544	1.04561	0	1.07087	3.26045	1.77828	1.02297	2.70065	0	2.23121	1.02767	0
DCUN1D1	1140.02	832.67	902.673	959.138	1550.16	1099.84	1342.32	1154.61	1136.83	1344.8	1171.12	1307.1	1264.03	1270.8	1270.59	1366.61	1528.7	1239	1232.45	1278.59	1526.28	1228.8	1285.27	1136.8	1206.48	1376.67
JADE2	5736.95	5689.64	5899.36	5594.29	4552.71	5751.95	6880.63	5459.91	5037.74	5548.22	7160.89	5383.41	4415.82	5514.48	7243.35	6480.66	4984.79	6215.33	5586.23	6889.07	4045.87	6146.69	5739.37	4337.48	4739.61	3491.53
ZIC2	0	0	0	0	0	1.01089	0	0	0	0	0	3.35154	0	0	0	0	0	0	0	1.77828	0	0	0	0	2.05534	0
LCP2	6897.06	6833.13	6937.78	6267.74	7636.34	7659.49	7916.37	7767.4	6563.59	8079.88	7512.92	8095.64	9460.6	7474.94	6584.53	7536.73	9611.8	7339.75	8515.2	8280.57	8156.18	8587.18	6522.97	8368.16	7969.58	5914.27
TRIT1	404.282	384.435	441.825	427.29	296.916	428.616	341.649	374.751	458.242	337.124	346.804	304.99	397.79	297.768	394.002	281.268	259.155	406.931	316.263	346.765	309.961	305.174	276.644	327.988	374.072	335.651
ADRB1	9.20724	17.9948	7.78166	15.6426	44.12	33.3593	59.339	44.2414	22.4246	78.5082	22.6555	330.127	76.7665	56.672	30.4498	23.0033	195.153	54.6144	86.9453	101.362	63.4244	136.833	13.2366	99.2889	12.332	34.0698
GUCA2B	0	0	0	0	0	0	0	0	0	0	0	0	0	0	0	0	0	0	0	1.77828	0	0	0	0	0	0
CUL7	738.254	893.198	790.271	746.728	581.907	777.372	824.453	745.164	745.862	735.207	758.96	593.222	671.707	683.906	809.226	753.882	777.464	717.483	711.865	707.756	615.831	741.78	616.823	697.254	488.143	664.993
CTNNA1	2054.89	2178.19	3688.51	3277.54	3981.53	3127.68	2270.17	3406.59	3085.82	1789.06	1908.29	3487.28	3058.45	2345.65	2933.33	1525.54	2780.4	3341.12	3707.13	2924.39	3507.78	2794.28	1172.76	3922.47	3204.27	4026.55
PHKA2	1495.76	1501.75	1735.31	1556.85	1671.79	1943.94	1505.95	1696.79	1667.22	1543.38	1494.39	1260.18	1641.76	1352.44	1631.37	1377.06	1847.66	1825.83	1492.2	1403.06	1549.81	1491.66	1101.28	1512.76	1306.17	1359.01
CNTLN	119.694	114.513	184.166	175.362	256.373	201.166	109.687	244.629	202.796	145.009	112.406	146.63	257.342	131.594	163.321	77.3748	310.566	183.119	227.145	215.172	306.892	155.738	62.2118	300.098	197.313	239.751
EPHA3	0.837022	2.45384	0	1.64659	0	0	0	0	0	0	0	0	0	0	0	0	0	1.07087	0	0	0	0.900218	1.32366	1.11561	0	0
HSPA5	11350	9057.95	10957.4	9467.06	21423.2	9360.81	13754.1	9098.98	7135.9	10382.5	10902.5	9880.34	10753.4	22419.1	12615.4	10709.1	13266.2	11069.6	11771.3	9162.6	12411.8	12461.7	11014.1	13855.8	17050.1	17407.2
DSG2	15.9034	26.1743	18.1572	23.0522	10.7319	23.2504	2.69723	20.8195	11.6998	28.6324	14.8132	0.837885	17.4469	9.60543	15.6862	15.6841	4.19684	16.0631	14.1286	13.3371	28.6433	14.4035	11.9129	14.5029	4.11068	22.7132
GEMIN8	376.66	349.263	261.983	277.45	290.953	357.854	391.098	335.714	336.369	347.284	340.704	348.56	383.832	380.375	391.233	387.92	254.958	316.978	358.649	304.975	237.33	334.881	296.499	243.202	346.325	291.486
OFD1	2331.94	2689.41	1756.93	2255	2557.77	2199.69	2502.13	1819.97	1924.62	2488.25	2468.58	2145.82	2211.4	2335.08	2689.73	2676.75	1827.72	2529.4	2212.76	2247.75	1308.38	1957.97	2708.2	1557.39	1870.36	2161.54
GPM6B	128.901	202.851	134.882	177.008	54.8519	111.198	146.549	151.809	220.346	138.544	126.348	164.225	147.427	139.279	96.8856	105.606	66.1002	125.292	103.248	131.593	58.3096	82.8201	72.8011	60.2427	66.7985	87.0673
MAGEC2	0	0	0	0	0	0	0	0	0	0	0	0	0	0	0	0	0	0	0	0	0	0	0	0	0	0
PREX2	0.837022	0.817947	0	0.823294	4.76973	1.01089	0	3.46991	0	0.923626	0	0	0.872347	0.960543	0.92272	0	2.09842	1.07087	1.08682	0.889141	1.02297	0	0	1.11561	0	1.26185
WDR37	2333.62	1914	2063.01	1882.87	1938.89	1892.38	2012.13	1800.02	1993.84	2229.63	1905.68	1886.92	2117.19	1959.51	1949.71	1756.62	2190.75	1970.4	1843.24	1897.43	1921.15	1725.72	1739.28	1760.43	1888.86	1788.04
YTHDC2	2069.96	1810.93	1608.21	1833.48	1529.89	1941.91	1815.24	1789.61	2331.18	2188.99	2050.32	1767.94	1999.42	1857.69	1837.14	1927.05	1544.44	1658.78	1606.31	1858.31	1773.84	1807.64	1778.99	1516.11	1727.51	1732.51
CTPS2	252.781	252.746	229.991	219.82	219.408	220.373	256.237	255.039	249.596	266.004	233.526	187.686	263.449	231.491	238.985	212.258	292.729	237.733	210.842	256.962	211.756	269.165	185.312	244.318	253.834	243.536
ATP6V1H	760.016	648.632	715.048	670.162	585.484	668.196	551.134	698.32	572.315	543.092	661.367	711.364	546.089	651.248	653.286	657.686	814.186	683.215	693.389	661.521	593.325	566.237	758.455	769.768	734.784	760.893
POLR2B	3276.1	3243.98	3581.29	3488.3	2690.13	2674.81	2654.97	2925.14	3055.6	2343.24	3020.15	3105.2	2654.55	3404.16	3104.03	2599.38	3381.6	2676.11	2513.81	3475.65	2384.55	2517.91	2602.31	2671.88	3040.88	2781.11
FAM214A	1658.14	1513.2	1453.44	1658.94	1986.59	1731.65	2155.99	1708.93	2230.76	2183.45	2323.06	1787.21	1792.67	2375.42	2154.55	2630.74	1324.1	1804.42	1849.76	1917.88	1744.17	2129.92	2705.55	1583.04	1802.53	2064.38
ARAP2	3374.87	2771.2	2927.63	2613.14	4316.6	2507	4009.88	3266.06	3035.12	2606.47	3319.9	3549.28	3096.83	3886.36	2963.78	2965.34	3978.6	2509.05	4599.41	3880.21	3220.32	3131.86	3188.69	2188.82	3475.58	4436.65
TPR	5860.83	6087.16	5965.94	6482.62	4568.21	5437.56	6395.13	5625.6	6040.02	7062.97	7105.99	6939.36	7238.73	7538.34	6684.19	7109.07	5707.7	5846.95	5706.87	7028.66	5892.33	6484.27	7695.73	5340.4	6565.78	5969.79
CP	14.2294	16.3589	12.9694	12.3494	7.15459	26.2831	13.4861	16.4821	20.4746	11.0835	10.4564	15.0819	24.4257	24.9741	11.0726	15.6841	29.3778	37.4805	6.5209	9.78055	13.2987	26.1063	9.26559	6.69363	4.11068	3.78554
KIAA0556	601.819	664.991	708.131	757.431	872.86	812.753	826.251	866.611	859.935	892.223	765.059	842.912	863.623	798.211	918.107	845.895	942.19	843.846	920.533	806.451	989.217	858.808	595.645	594.618	956.761	741.965
DTNBP1	557.457	499.766	490.245	545.021	515.131	456.921	605.977	549.114	450.442	380.534	670.08	613.332	523.408	463.942	527.796	672.324	579.163	527.939	618.398	580.609	583.096	629.253	686.977	534.375	575.495	522.404
XK	102.954	94.0639	89.9214	149.016	159.786	139.502	399.19	374.751	168.672	140.391	365.102	236.283	60.1919	129.673	135.64	402.558	310.566	66.394	359.736	270.299	577.981	164.74	99.2742	107.098	109.961	128.708
ANO2	1.67404	2.45384	3.45852	0.823294	3.5773	2.02177	3.59631	6.07235	4.87492	1.84725	25.2696	5.86519	0	0	2.76816	2.09121	1.04921	2.14174	16.3022	1.77828	18.4135	4.50109	0	0	0	2.52369
C12orf4	400.934	375.438	409.834	478.334	381.578	381.104	418.071	442.414	380.243	333.429	534.147	522.002	402.152	458.179	437.369	358.643	538.244	321.261	439.074	500.587	377.478	438.406	448.719	439.549	530.278	413.885
SCML1	739.091	554.568	317.319	535.141	597.409	643.935	525.061	533.499	738.062	1027.07	707.549	382.913	997.964	565.76	619.145	966.14	349.387	569.703	493.415	493.473	830.656	721.975	918.617	593.502	537.471	642.279
WWC3	1511.66	1901.73	1935.9	1921.57	2459.99	2500.93	2365.47	3592.23	3452.42	2623.1	2748.29	1700.07	2632.74	2626.12	3688.11	3399.26	3068.94	2733.93	2813.77	2430.02	2535.95	2934.71	2569.22	1777.16	1585.69	1800.65
ARHGAP6	60.2656	55.6204	120.183	111.968	190.789	165.785	81.8159	273.256	160.872	120.071	272.738	136.575	92.4687	121.989	124.567	85.7397	194.104	81.3862	377.125	189.387	436.81	143.135	30.4441	64.7051	91.4626	63.0923
FAM184B	498.865	531.666	426.262	518.676	199.136	290.125	397.392	438.944	610.339	572.648	366.845	465.026	491.131	386.138	310.034	431.835	347.288	388.726	408.643	399.224	367.248	326.779	329.59	272.208	236.364	336.913
MAP4	2937.95	3335.59	3443.82	3048.66	3571.33	3248.99	3980.21	3530.64	3243.77	2837.38	3265.01	4289.13	3485.9	3903.65	4368.16	3685.76	3732.04	2989.87	4222.28	4414.59	3663.27	3486.54	2701.58	2929.58	3830.13	2948.93
GOPC	1724.27	1505.84	1433.56	1544.5	1043.38	1436.47	1249.72	1303.82	1308.43	1215.49	1342.77	1347.32	1190.75	1409.12	1442.21	1286.1	1418.53	1241.14	1165.07	1305.26	994.331	1289.11	1548.68	1306.37	1410.99	1163.42
ROS1	0.837022	0	0	0	0	0	0	0	0	0	0	0	0	0	0	0	0	0	0	0	0	0	0	0	0	0
USP28	1525.05	1190.93	1572.76	1263.76	1590.7	1186.78	1530.23	1321.17	1236.28	822.027	1444.72	1998.35	901.134	2290.89	1526.18	1278.78	2084.78	902.744	1753.03	1781.84	1025.02	1331.42	1258.8	977.271	871.464	1413.27
HDAC9	690.543	958.634	568.926	901.507	964.678	515.552	470.217	1119.05	1232.38	539.398	849.582	753.258	656.877	757.868	1089.73	826.029	407.093	601.829	540.148	803.784	629.129	830.001	972.887	674.941	831.385	478.239
TSPAN17	1165.13	1094.41	1240.74	1154.26	1439.27	1141.29	1366.6	1309.03	1072.48	1110.2	1399.41	1886.92	1238.73	1321.71	1352.71	1285.05	1537.09	1319.31	1188.98	1277.7	1373.86	1321.52	1224.38	1205.97	1153.05	1024.62
NOP16	186.656	228.207	166.009	200.884	253.988	193.079	258.934	226.412	181.347	206.892	210.871	227.905	218.087	200.753	230.68	279.177	193.054	189.544	174.977	185.831	189.25	230.456	272.673	238.74	213.755	182.968
CC2D2A	35.992	53.9845	54.4716	60.9238	56.0443	58.6314	56.6418	84.1454	145.272	75.7374	59.2529	119.818	102.065	64.3564	67.3586	53.3259	65.0509	109.229	54.3408	62.2399	122.757	77.4188	34.415	59.1271	30.8301	51.7357
RRM2B	867.155	680.532	897.485	824.118	1001.64	677.294	742.637	1034.9	1076.38	746.29	1010.78	802.693	970.049	816.461	1108.19	1051.88	1104.82	1045.17	1096.6	963.829	1161.08	943.429	1403.07	938.224	916.682	955.217
ZNF800	1979.56	1384.78	1449.12	1457.23	3806.24	2031.88	2817.71	2195.59	2154.71	3051.66	2381.44	2002.54	2821.17	2310.11	2326.18	3415.99	2241.11	2189.93	2757.25	2323.33	2729.3	2777.17	3013.96	1774.93	1881.66	2504.76
TNFRSF17	215.952	62.164	163.415	63.3937	54.8519	32.3484	194.2	9.54227	6.82488	45.2577	161.203	131.548	21.8087	1438.89	499.192	223.76	18.8858	17.1339	215.19	138.706	23.5284	267.365	197.225	292.289	681.345	471.93
SNX29	2208.06	2300.89	2222.96	2273.94	3422.28	2635.38	2367.27	2889.57	3060.47	2627.72	2843.27	1849.21	2757.49	2385.99	2999.76	2782.36	1818.28	2713.59	2344.26	2185.51	2612.68	3199.38	3321.05	2334.96	2296.84	2354.6
LMO3	0	0	0	0.823294	1.19243	1.01089	0	0	0	0.923626	0	0.837885	0	0	0.92272	0	0	0	0	0	1.02297	0.900218	0	0	0	2.52369
MRPS10	751.646	748.422	594	656.166	869.283	661.12	676.105	664.489	651.289	640.997	724.105	687.065	747.601	934.608	793.539	598.086	721.856	754.964	832.501	775.331	765.185	798.494	697.566	799.889	753.282	805.057
GUCA1A	0.837022	0.817947	0	0.823294	0	0	0.899076	0.867479	0.974983	0	0	0	0.872347	1.92109	0.92272	0	0	2.14174	0	1.77828	0	0	0	3.34682	0	0
RSF1	1855.68	1533.65	1625.5	1672.93	2073.64	1656.84	2330.41	1773.13	2018.22	2117.88	2297.79	1607.06	2107.59	2040.19	1769.78	2299.29	1709.16	1923.28	2136.68	2026.35	1919.1	2166.83	2495.09	1741.46	2324.59	2729.37
VPS13D	3292.85	2855.45	3040.04	4030.85	3310.19	3432.97	4215.77	4073.68	4848.59	3941.11	4143.35	4611.72	4185.52	4162.03	3558.93	3687.85	3431.96	3780.17	3264.8	4507.95	3737.95	4355.26	4235.7	2784.55	4316.21	4179.23
CELF2	8927.68	8309.52	8350.59	9103.17	13769	9805.6	10709.8	13131	15254.6	11575.8	11061.1	10709.8	11406.8	10899.3	9568.61	10125.6	17245.8	9542.53	9866.12	11241.4	11289.5	10824.2	9292.06	8142.81	9120.57	11351.6
FAM120A	6041.63	5404.99	6660.24	6227.4	7666.15	7388.57	6918.39	7795.16	7217.8	6680.59	6063.84	7558.56	7819.71	7030.21	7191.68	6119.93	8963.39	8184.66	7525.11	7028.66	8485.58	7416	5107.99	7667.56	6660.33	7473.91
R3HDM1	1410.38	1263.73	1197.51	1177.31	1721.87	1603.27	1585.97	1542.38	1435.18	1572.94	1611.16	1742.8	1716.78	1782.77	1730.1	1774.39	1538.14	1516.35	1626.96	1409.29	1614.25	1832.84	1575.15	1567.43	1533.28	1429.67
COL9A2	342.342	582.378	418.48	318.615	951.561	749.067	347.043	737.357	670.788	481.209	322.405	561.383	709.218	400.546	498.269	303.226	846.712	493.671	445.595	336.985	432.718	401.497	210.461	518.757	202.451	374.768
KITLG	1.67404	0.817947	6.0524	4.93977	4.76973	4.04355	0.899076	3.46991	5.8499	2.77088	8.71366	6.70308	2.61704	5.76326	1.84544	0	0	5.35435	6.5209	8.89141	3.06892	4.50109	1.32366	6.69363	8.22136	3.78554
ERCC8	179.123	166.861	210.97	161.366	166.941	190.047	142.054	177.833	194.022	179.184	167.302	168.415	184.065	187.306	185.467	179.844	169.972	188.473	127.157	175.161	176.975	189.046	153.544	227.584	215.811	254.893
ADAMTS6	91.2354	85.8844	57.0655	71.6266	35.773	43.4681	53.0455	83.2779	91.6484	55.4176	69.7093	67.8687	44.4897	87.4094	110.726	101.424	32.5255	84.5988	56.5144	59.5725	25.5744	72.0175	68.8301	56.8959	48.3005	36.5935
H6PD	2371.28	2819.46	2655.28	2052.47	3497.4	3735.23	3553.15	4091.9	3720.54	3406.33	2607.13	3173.91	2927.59	3626.05	3812.68	2413.26	4888.26	3795.16	3238.71	3643.7	3170.2	2830.29	1690.31	2506.77	2402.69	2842.94
VAMP3	1848.98	1996.61	2118.34	2081.29	3937.41	2697.05	2164.08	2964.17	2312.66	2640.65	1812.44	2397.19	3018.32	1856.73	2033.68	1853.86	4009.03	3071.26	3153.94	2325.99	4190.1	2720.46	1870.33	3549.86	2855.89	3139.47
PER3	190.004	298.551	164.28	176.185	378.001	222.395	204.989	203.857	139.423	200.427	196.929	138.251	213.725	147.924	146.713	99.3325	132.2	368.379	182.585	208.948	182.09	224.154	76.772	171.803	205.534	165.302
UTS2	30.9698	22.0846	21.6157	257.691	348.19	16.1742	24.2751	13.0122	6.82488	15.7016	26.141	9.21673	9.59581	17.2898	23.9907	25.0945	7.34446	6.42522	534.714	27.5634	20.4595	13.5033	27.7968	302.329	22.6087	13.8803
TNFRSF9	46.8732	36.8076	35.4498	23.8755	52.467	32.3484	26.0732	47.7113	44.8492	26.7852	145.518	66.1929	37.5109	87.4094	60.8995	40.7786	59.8049	54.6144	11.955	87.1358	30.6892	29.7072	38.386	35.6994	46.2451	61.8304
EPN3	1.67404	2.45384	1.72926	3.29318	11.9243	5.05443	1.79815	0.867479	3.89993	4.61813	2.6141	0.837885	2.61704	3.84217	4.6136	8.36485	2.09842	8.56696	4.34726	5.33485	4.0919	6.30153	2.64731	2.23121	0	1.26185
SRD5A2	0	0	0	0	0	1.01089	0	0	0	0	0.871366	0.837885	1.74469	0.960543	0	0	0	1.07087	0	0.889141	1.02297	0	0	0	1.02767	0
LTBP1	81.1912	50.7127	193.677	293.916	162.171	147.589	137.559	351.329	241.796	187.496	303.235	211.147	98.5752	161.371	105.19	113.971	243.416	134.93	457.55	314.756	487.959	135.033	39.7097	84.786	166.483	78.2344
RCN1	430.229	418.789	392.542	409.177	412.582	367.963	324.567	418.125	357.819	318.651	237.883	408.05	424.833	436.086	323.875	306.362	487.882	284.852	397.775	314.756	360.087	443.808	423.57	513.179	367.906	478.239
ELN	0.837022	0	0.864629	2.46988	3.5773	0	2.69723	0.867479	0	0	0.871366	0.837885	0	2.88163	1.84544	1.04561	1.04921	2.14174	0	3.55657	4.0919	0	1.32366	0	0	3.78554
RFC2	351.549	380.345	455.66	396.828	389.925	485.226	363.227	341.787	311.02	350.978	369.459	477.594	432.684	466.824	420.76	419.288	564.474	355.529	361.91	409.005	381.57	434.805	334.885	413.89	373.044	410.1
ARID1B	3127.11	2783.47	3077.22	2960.57	4626.64	3943.47	4747.12	4294.02	4199.25	4372.45	4986.83	3606.26	4220.41	4201.41	5000.22	4966.63	3674.33	4541.56	4453.77	4242.09	4376.29	4817.07	4313.79	2932.93	3044.99	3432.22
CLPTM1L	2618.21	2522.55	2713.21	2681.47	3188.56	2505.99	2734.99	2318.77	2338.01	2305.37	2679.45	3032.3	2488.8	5526.96	3344.86	2810.59	2999.69	2360.2	3060.47	2718.1	2951.28	3071.54	2209.18	2878.26	3204.27	3111.71
NEDD4L	102.954	130.054	145.258	126.787	277.837	162.753	212.182	150.941	191.097	169.024	145.518	118.98	201.512	100.857	160.553	174.616	112.265	189.544	252.141	110.254	137.079	181.844	90.0086	160.647	116.127	157.731
FOXP3	187.493	536.573	309.537	336.727	170.518	499.378	716.564	168.291	231.071	285.401	612.57	506.92	276.534	338.111	704.958	560.445	186.759	288.064	302.135	454.351	381.57	446.508	524.168	619.161	690.594	211.99
PPP1R3F	228.507	314.91	225.668	218.173	208.676	368.974	375.814	281.931	304.195	413.785	350.289	271.475	324.513	258.386	287.889	314.727	192.005	334.112	258.662	296.973	263.927	280.868	195.901	167.341	168.538	152.683
HEXB	1784.53	2452.21	2772	2447.65	4501.43	2990.2	2302.53	3821.24	3268.14	2531.66	1849.91	3111.07	2926.72	2430.17	2345.55	1733.61	3875.78	4282.41	3164.81	2526.94	4122.59	3190.37	1307.77	5024.69	2947.36	4306.68
PTCD2	148.153	125.964	136.611	119.378	104.934	135.459	149.247	136.194	153.072	145.009	139.419	165.901	142.192	157.529	125.49	130.701	128.003	124.221	126.071	133.371	97.1826	142.234	125.747	109.329	102.767	112.304
KIAA2022	37.666	37.6256	27.6681	23.8755	7.15459	46.5008	51.2474	18.2171	16.5747	40.6396	33.1119	12.5683	72.4048	24.0136	25.8362	84.6941	30.4271	32.1261	19.5627	26.6742	33.7582	15.3037	74.1247	12.2717	31.8578	15.1421
JKAMP	889.755	847.393	962.332	945.142	804.892	965.397	666.216	943.817	745.862	678.865	761.574	1013.84	796.452	894.265	863.666	644.093	1268.49	915.594	939.009	910.481	933.976	800.294	698.89	1124.53	983.48	929.98
DKK3	44.3622	59.7101	31.9913	39.5181	107.319	43.4681	58.44	39.904	51.6741	37.8687	56.6388	33.5154	27.0427	23.053	46.136	42.8698	18.8858	2.14174	56.5144	48.9028	37.8501	33.3081	47.6516	13.3873	1.02767	35.3317
ARHGEF5	48.5473	62.164	63.1179	70.8033	51.2746	69.7512	71.027	52.9162	70.1988	84.05	94.1075	46.9215	64.5536	170.016	108.881	117.108	13.6397	46.0474	47.8199	95.1381	28.6433	80.1194	51.6226	51.3179	54.4665	61.8304
NFE2L3	337.32	603.645	484.192	635.583	248.026	591.369	230.164	600.295	606.44	478.438	398.214	625.062	500.727	575.365	493.655	383.737	464.8	618.963	456.463	472.134	675.163	557.235	303.117	659.323	448.064	543.855
MCUR1	213.441	192.218	225.668	176.185	369.654	353.81	304.787	400.775	299.32	290.942	344.19	336.83	305.321	477.39	369.088	325.183	343.091	340.537	453.202	359.213	455.224	306.074	207.814	257.705	278.499	277.606
LIMA1	400.934	472.773	545.581	507.973	228.947	457.932	384.805	388.63	333.444	274.317	573.359	490.163	414.365	629.156	505.651	270.812	231.875	363.025	345.608	464.132	237.33	271.866	202.519	296.751	447.036	208.204
LETMD1	1548.49	1844.47	1491.49	1730.56	1360.57	1826.67	1689.36	1568.4	1693.55	1737.34	1690.45	1515.73	1784.82	1529.18	1585.23	1588.28	1400.69	1774.43	1377	1363.05	1356.46	1548.38	1683.69	1628.78	1523.01	1529.36
SLC4A8	207.582	157.046	138.341	162.189	212.253	241.602	134.861	183.038	233.996	154.246	123.734	173.442	176.214	204.596	139.331	125.473	142.692	115.654	291.267	224.064	229.146	156.638	99.2742	140.566	159.289	118.613
LAMC3	27.6217	11.4513	17.2926	9.87953	19.0789	86.9363	56.6418	17.3496	27.2995	94.2099	39.2115	10.8925	85.49	18.2503	8.30448	90.9677	15.7381	42.8348	20.6495	32.8982	6.13785	21.6052	112.511	29.0057	10.2767	11.3566
PTGER3	25.9477	21.2666	17.2926	14.8193	326.726	49.5335	17.9815	45.1089	109.198	69.272	40.9542	17.5956	53.2131	9.60543	33.2179	58.5539	22.0334	20.3465	15.2154	45.3462	149.354	55.8135	21.1785	13.3873	42.1345	49.212
TNIP3	23.4366	52.3486	47.5546	16.4659	31.0032	15.1633	78.2196	27.7593	23.3996	37.8687	57.5102	68.7065	38.3832	58.5931	33.2179	39.733	17.8365	29.9844	86.9453	63.129	19.4365	18.0044	38.386	15.6185	28.7748	82.02
MAPK9	1253.86	1241.64	1244.2	1183.9	1374.87	1352.57	1376.49	1443.48	1342.55	1332.79	1360.2	1291.18	1297.18	1362.05	1353.63	1394.84	1399.64	1351.44	1285.7	1250.13	1363.63	1227.9	1343.51	1271.79	1240.4	1318.63
COL23A1	16.7404	7.36152	9.51092	7.40965	13.1168	11.1198	2.69723	12.1447	17.5497	11.0835	4.35683	4.18942	13.0852	15.3687	9.2272	16.7297	23.0826	3.21261	16.3022	17.7828	27.6203	12.6031	5.29462	27.8901	10.2767	11.3566
BCAR1	1.67404	0.817947	0	0	7.15459	1.01089	0.899076	0.867479	3.89993	0.923626	5.2282	9.21673	0.872347	4.80271	3.69088	6.27363	3.14763	1.07087	1.08682	0.889141	3.06892	1.80044	3.97097	1.11561	2.05534	3.78554
FAM160A2	1602.06	2089.04	2789.29	1943.8	2245.35	2502.96	1518.54	2517.42	2286.34	1560	1619.87	1752.85	1906.08	1582.01	1716.26	1472.21	2756.27	2431.95	1672.61	1756.05	2041.86	2122.71	994.065	1787.2	1459.29	1769.11
HERPUD1	2894.42	2759.75	2872.3	2269.82	10970.4	4036.47	4017.07	4470.98	4087.13	3004.56	3897.62	2518.68	3463.22	4062.14	3951.09	3827.96	4863.08	3334.69	5247.15	3081.76	4946.08	3911.45	7199.36	3556.55	4668.7	7880.22
HOMER3	104.628	138.233	252.472	149.84	264.72	227.45	141.155	219.472	236.921	152.398	128.091	175.118	142.192	90.291	140.253	74.238	251.81	348.033	183.672	132.482	259.836	234.057	30.4441	340.26	123.32	209.466
RAD51	47.7103	33.5358	34.5852	26.3454	17.8865	28.3048	46.752	25.1569	19.4997	25.8615	56.6388	98.8704	75.0218	183.464	57.2087	67.9644	49.3128	25.7009	40.2122	45.3462	27.6203	54.0131	41.0333	64.7051	82.2136	55.5212
POLQ	55.2435	31.082	29.3974	41.988	15.5016	41.4464	66.5317	38.1691	34.1244	40.6396	66.2238	131.548	89.8517	306.413	114.417	111.88	83.9367	16.0631	40.2122	72.0204	34.7811	84.6205	51.6226	55.7803	90.435	65.616
PIK3CB	777.594	735.334	975.302	903.154	1280.67	1013.92	714.766	1110.37	1047.13	1011.37	872.237	879.779	960.454	893.305	994.692	828.12	1082.78	1141.55	1233.54	1097.2	1234.73	1044.25	857.729	847.86	1175.65	1294.65
CYBA	7922.41	8213.01	9836.89	7404.71	16279.1	11302.7	10842.9	13301.9	12122	10300.3	9424.69	12182.8	10615.6	11516.9	11506.3	10012.7	17342.4	12934	13908	11468.1	13445	10570.4	5700.98	9376.67	7724.99	10229.8
THOC3	176.612	161.136	148.716	198.414	261.143	336.625	414.474	229.014	275.92	217.976	312.82	408.05	313.172	307.374	304.498	185.072	226.629	249.513	194.54	243.625	190.273	297.072	125.747	130.526	152.095	147.636
HEBP2	467.895	907.921	775.572	801.065	1723.06	1228.23	948.526	1057.46	933.059	1260.75	1139.75	871.4	1268.39	998.965	1178.31	1009.01	1633.62	1911.5	1203.11	459.686	781.553	970.435	896.115	1201.51	876.602	1250.49
MPHOSPH9	1620.47	1235.92	982.219	1375.73	1379.64	1368.74	1893.45	1279.53	1543.4	1867.57	1768	1952.27	1882.52	1971.99	1522.49	1794.26	1502.47	1494.94	1432.42	1779.17	1241.89	1677.11	1587.06	1066.52	1189.01	1288.34
PLEKHA5	96.2576	199.579	218.751	158.073	405.427	152.644	200.494	218.605	192.072	181.954	155.103	143.278	133.469	229.57	159.631	117.108	101.773	223.812	270.617	201.835	164.699	154.838	135.013	81.4392	197.313	172.873
PRSS8	2.51107	0.817947	3.45852	3.29318	1.19243	3.03266	0.899076	4.33739	2.92495	2.77088	1.74273	3.35154	4.36173	2.88163	2.76816	4.18242	1.04921	3.21261	4.34726	2.66742	4.0919	7.20175	1.32366	3.34682	0	1.26185
SIKE1	1561.88	1272.73	1243.34	1244	1472.65	1665.94	1536.52	1614.38	1499.52	1343.88	1479.58	1611.25	1489.1	1582.97	1534.48	1512.99	1746.93	1416.76	1517.2	1423.52	1290.99	1446.65	1426.9	1340.96	1232.18	1410.74
RRP12	1276.46	1163.12	1351.42	1245.64	1804.15	1330.33	1193.97	1361.94	1284.05	2406.97	1673.02	1391.73	2155.57	1343.8	1327.79	1481.62	1936.84	1793.71	1593.27	1299.04	2225.99	1262.11	960.974	2259.1	1528.15	865.626
FNIP2	866.318	670.717	790.271	770.604	1137.58	865.319	756.123	1015.82	1051.03	688.102	492.322	971.946	883.687	645.485	641.291	650.367	1911.66	668.223	956.398	1016.29	1427.05	771.487	526.815	915.912	975.259	1056.16
MSMO1	225.996	227.389	226.533	259.338	494.859	294.168	372.218	252.436	303.22	270.623	321.534	538.76	259.959	418.797	353.402	297.998	376.666	231.308	355.389	364.548	263.927	298.872	354.74	228.699	406.957	383.601
TTC17	3024.16	3215.35	2803.13	3225.67	3237.45	3165.09	2931.89	3454.3	3437.79	2950.06	3010.57	3281.99	3280.02	3088.15	3187.08	3056.31	3332.29	3093.74	3056.13	3160.9	3432.08	3229.08	3270.75	3390.33	3295.74	3043.57
ALX4	0.837022	0	0	0.823294	3.5773	0	1.79815	3.46991	2.92495	2.77088	1.74273	4.18942	2.61704	1.92109	0.92272	1.04561	3.14763	2.14174	2.17363	7.11313	4.0919	5.40131	0	0	1.02767	0
FSTL4	3.34809	8.17947	8.64629	8.23294	11.9243	14.1524	7.19261	13.8797	13.6498	12.0071	13.0705	3.35154	4.36173	13.4476	14.7635	8.36485	3.14763	20.3465	5.43408	11.5588	13.2987	10.8026	0	3.34682	9.24903	5.04738
FOXN3	6784.9	5646.29	5355.51	5596.76	7965.45	5589.19	6972.34	7294.63	7111.53	7478.6	6860.26	5389.27	7022.39	6374.16	6313.25	6718.02	7428.4	7197.32	7426.21	6759.25	7938.28	6815.55	6921.39	6313.21	7059.06	7952.15
METTL24	3.34809	1.63589	4.32315	1.64659	5.96216	1.01089	0	0	2.92495	0	2.6141	0.837885	0.872347	0.960543	0.92272	6.27363	4.19684	2.14174	1.08682	1.77828	0	0	2.64731	1.11561	0	3.78554
AKR7A2	550.761	672.353	690.839	590.302	752.425	814.775	635.647	576.006	491.391	678.865	619.541	617.521	658.622	611.866	461.36	475.751	677.789	806.365	670.566	673.969	752.909	644.556	273.997	618.046	590.91	557.736
MRTO4	451.155	523.486	462.577	462.691	482.935	441.758	401.887	330.509	334.419	384.229	452.239	446.593	416.109	538.865	468.742	454.838	403.945	457.262	477.112	402.781	338.605	386.194	547.993	452.936	502.531	422.718
NNAT	62.7767	76.887	48.4192	54.3374	87.0476	116.252	115.082	124.917	116.023	125.613	77.5516	105.573	91.5964	97.9754	88.5811	83.6485	86.0351	117.796	91.2926	63.129	114.573	129.631	26.4731	90.3641	27.7471	42.9027
USE1	405.956	431.058	466.035	433.876	382.771	348.756	329.961	347.859	283.72	369.451	399.957	285.719	360.279	328.506	403.229	351.324	242.367	383.372	310.829	327.204	293.594	338.482	463.279	362.572	430.594	295.272
MCF2L2	31.8068	43.3512	76.952	48.5744	42.9276	91.9907	114.183	43.3739	55.574	33.2505	118.506	100.546	36.6386	65.3169	74.7403	77.3748	36.7223	71.7483	48.9067	68.4639	49.1028	78.319	55.5935	64.7051	100.712	45.4264
NRIP2	343.179	337.812	264.577	282.39	356.537	359.876	416.272	337.449	480.667	465.508	415.642	274.826	463.216	327.545	311.879	403.604	254.958	409.073	343.434	354.767	335.536	406.899	288.557	206.387	274.388	285.177
LAMA3	2.51107	1.63589	0	2.46988	1.19243	3.03266	0.899076	1.73496	1.94997	0	0	0.837885	0	0.960543	2.76816	2.09121	1.04921	2.14174	1.08682	2.66742	1.02297	0.900218	5.29462	2.23121	3.08301	2.52369
AP5M1	859.622	808.132	1006.43	911.387	863.321	988.647	829.847	897.84	1013.01	914.39	1083.11	1131.14	900.262	1135.36	1072.2	1009.01	1158.33	792.444	909.665	1123.87	807.127	996.542	1028.48	792.08	867.353	904.743
ANAPC4	1656.47	1648.98	1565.84	1514.04	1386.8	1383.9	1573.38	1368.01	1461.5	1169.31	1407.26	1388.37	1412.33	1323.63	1322.26	1328.96	1313.61	1075.15	1330.26	1467.08	1301.22	1245	1486.47	1509.41	1601.11	1311.06
KCNQ1	1048.79	1316.08	1350.55	1126.27	2426.6	1835.77	1370.19	1917.13	1704.27	1968.25	1141.49	1361.56	2045.65	1058.52	1200.46	1256.82	1608.44	2457.65	1797.59	1313.26	2271	1829.24	894.791	1993.59	1271.23	1735.04
TRAPPC3	995.219	1056.79	1034.1	999.479	916.98	937.092	759.72	878.756	709.788	754.603	827.798	1000.43	831.346	941.332	854.439	727.742	1090.13	952.004	894.45	887.363	849.069	791.292	939.795	1217.13	1088.3	948.908
THRAP3	3415.05	3294.69	4343.03	3738.58	3229.11	3433.98	3639.46	4114.45	4203.15	2878.02	4698.41	3995.03	3288.75	5050.53	5014.98	4380.04	4926.04	3589.56	4186.42	4769.35	3305.23	3863.74	3491.8	2986.48	3168.31	3114.23
PHPT1	498.865	468.684	511.86	442.932	740.5	445.801	579.005	480.583	459.217	423.944	372.945	770.854	398.662	630.116	452.133	324.138	752.283	373.734	608.617	539.709	565.705	464.513	319.001	507.601	455.258	586.758
ENTPD2	4.18511	1.63589	1.72926	1.64659	1.19243	3.03266	0.899076	0.867479	0.974983	10.1599	12.1991	9.21673	1.74469	8.64489	3.69088	5.22803	3.14763	8.56696	10.8682	4.44571	3.06892	2.70065	3.97097	3.34682	1.02767	2.52369
LY75	727.372	876.021	857.712	996.186	668.955	665.164	772.307	1076.54	1009.11	1022.45	839.125	752.42	857.517	866.41	799.998	721.468	1105.87	818.145	755.337	770.885	617.877	796.693	796.841	645.936	872.492	753.322
ARID4B	3275.27	2988.78	3196.53	3158.98	3871.83	3336.94	4311.07	3432.61	3583.06	3809.96	4181.69	3699.26	3730.15	3453.15	3854.2	4738.69	3909.35	3595.98	3911.45	3788.63	3511.87	4285.94	5232.41	3608.98	4397.4	4319.3
OPN3	256.129	229.843	239.502	237.932	313.61	301.244	223.87	392.968	355.869	247.532	257.053	229.58	279.151	286.242	385.697	324.138	304.271	259.151	282.572	264.964	334.513	295.272	255.466	229.815	155.178	165.302
SDCCAG8	543.227	607.735	596.594	558.194	622.45	788.492	645.537	772.923	752.687	568.954	643.068	661.091	673.452	568.641	724.335	642.002	637.919	704.633	674.913	692.641	796.897	705.771	679.035	876.866	595.021	594.329
PTPRN	5.85916	1.63589	5.18777	16.4659	16.6941	19.2069	13.4861	15.6146	15.5997	10.1599	20.9128	16.7577	2.61704	4.80271	9.2272	4.18242	8.39367	6.42522	15.2154	16.0045	31.7122	1.80044	6.61828	6.69363	10.2767	6.30923
HHAT	109.65	148.048	153.039	159.719	108.511	162.753	150.146	142.266	143.323	119.148	167.302	124.845	108.171	83.5672	138.408	100.378	99.6748	118.867	132.592	140.484	129.918	144.035	95.3032	131.641	213.755	155.207
KIF1B	582.567	808.95	1080.79	977.251	877.63	914.853	1048.32	1192.78	1247	823.875	1177.22	1608.74	1295.43	1168.98	1062.05	697.419	1485.68	1243.28	1240.06	1567.56	2043.9	1016.35	521.52	744.109	1168.46	1188.66
FOXC1	5.85916	4.08974	5.18777	6.58636	28.6184	1.01089	17.9815	38.1691	17.5497	12.0071	3.48546	19.2713	13.0852	12.4871	10.1499	10.4561	100.724	17.1339	26.0836	21.3394	32.7352	15.3037	11.9129	11.1561	7.19369	22.7132
TBC1D22A	1403.69	1325.07	1427.5	1180.6	1603.82	1780.17	1217.35	1465.17	1257.73	1391.9	1528.38	1380.83	1377.44	1283.29	1688.58	1435.62	1359.77	1455.31	1703.04	1598.68	1704.28	1461.05	1363.37	1416.82	1128.38	1251.75
SYNE2	6217.4	5051.64	5967.67	9688.53	8003.61	5624.57	12065.6	9475.47	12508.1	9072.78	11721.6	15376.9	7965.4	15326.4	6465.5	9174.14	6554.41	5882.29	8029.4	14636.2	8889.65	8718.61	11797.7	4133.32	11336.2	10851.9
PLEKHH1	19.2515	13.0872	17.2926	10.7028	22.6562	19.2069	14.3852	19.952	31.1995	12.0071	23.5269	35.1912	25.298	18.2503	19.3771	16.7297	28.3286	11.7796	15.2154	17.7828	22.5054	22.5055	10.5892	18.9653	10.2767	15.1421
ATP9A	290.447	251.11	250.742	295.563	378.001	184.992	85.4123	182.171	124.798	109.912	166.431	262.258	42.745	447.613	146.713	52.2803	438.569	132.788	285.833	224.064	426.58	209.751	33.0914	108.214	71.9369	175.397
SPO11	0	0	0	0	0	0	0	0	0	0	0	0	0	0	0	0	0	0	0	0	0	0	0	0	0	0
CBLN4	0.837022	0	0	0	0	0	0	0	0	0	0	0	0	0	0	0	0	0	0	0	0	0	0	0	0	0
CHRDL2	0.837022	0	0	0	0	0	0	3.46991	3.89993	0.923626	4.35683	0	1.74469	0.960543	0	0	0	0	0	0	3.06892	3.60087	1.32366	0	0	0
FAM168A	1823.87	1723.41	1753.47	1866.41	1731.41	1912.6	1815.24	2082.82	2025.04	1802.92	2062.52	1878.54	2177.38	1762.6	1987.54	1760.8	2112.06	1992.89	1978.01	2425.58	2395.81	1934.57	1539.41	1636.59	1750.12	1735.04
RELT	1520.87	1260.46	1330.66	1332.91	3313.77	2437.25	2294.44	2806.29	2507.66	3755.46	2049.45	1968.19	3909.86	1954.7	2106.57	2376.66	2565.32	3209.4	3951.66	2480.7	6483.61	4095.09	1143.64	2298.15	1752.18	1827.15
GALC	1330.87	1261.27	1607.35	1498.4	1952.01	1371.77	1348.61	1966.57	1641.87	1364.2	1165.89	1735.26	1600.76	1330.35	1509.57	1396.93	3238.91	1773.36	1761.73	1517.76	2154.38	1523.17	1323.66	2039.33	1874.47	1945.77
NOP58	2092.56	2014.6	1864.14	1796.43	2643.62	1957.08	2626.2	1492.93	1563.87	2022.74	2193.23	1851.73	1965.4	2193.88	1982	2569.05	1352.43	1780.86	1939.97	1791.62	1517.07	2176.73	3870.37	1965.7	2523.96	2392.46
SZRD1	2385.51	2455.48	2720.99	2395.79	4199.75	2818.35	3072.14	2657.95	2233.69	2904.8	2904.26	2930.92	2977.32	2817.27	2953.63	2828.36	3388.94	3087.32	3619.1	2987.51	4038.7	3176.87	3037.79	3102.5	2820.95	2752.08
KCNH2	96.2576	130.872	83.0044	124.317	57.2367	200.156	185.21	106.7	122.848	212.434	115.892	86.3021	144.81	74.9223	135.64	83.6485	53.5096	161.701	103.248	147.597	93.0907	111.627	63.5355	128.295	71.9369	49.212
CUL1	2445.78	2329.51	2366.49	2512.69	2553	2576.75	2851.87	2824.51	2768.95	2110.49	2346.59	3082.58	3464.96	2791.34	2575.31	2745.76	4138.08	2308.8	3290.88	2718.99	2652.57	3287.6	3025.88	3585.56	3239.22	3300.99
FAM114A2	469.569	429.422	541.258	482.451	399.465	532.737	413.575	428.534	498.216	327.887	455.724	573.113	434.429	537.904	521.337	416.151	535.096	400.506	428.206	524.593	345.765	442.007	467.25	452.936	491.226	360.888
CYFIP2	15717.6	12568.6	12155	11832.4	11716.8	12006.3	13492.4	10891.2	9924.35	13435.1	14038.6	11855.2	11609.2	13748.2	13834.3	14605	9275.01	12375	12534.2	13237.5	10798.5	12743.5	16054.6	10150.9	12447.1	10191.9
TAB2	6203.17	6309.64	5773.99	5664.27	6180.38	8779.55	9879.05	6765.47	6239.89	7522.94	8137.69	7798.19	8525.44	5964.97	8179.91	10579.4	5835.7	7692.06	7159.94	7154.92	5845.28	10080.6	11629.6	7766.85	8806.1	6291.56
GINM1	613.537	505.491	705.537	642.17	1055.3	912.831	849.627	734.754	660.064	850.66	693.607	758.286	841.814	823.185	812.917	810.344	979.961	905.956	883.581	667.745	986.148	962.333	1009.95	985.08	691.622	788.653
EIF2AK2	2961.38	1621.17	2084.62	2607.37	2564.92	2099.61	6331.3	6141.75	5519.38	1803.84	2494.72	10756.8	5655.42	4141.86	4500.11	7854.59	11306.3	2077.49	8000.05	7515.02	6570.57	9014.78	8492.57	10030.4	7815.43	8599.48
USP36	2751.29	2590.44	3128.23	2327.45	3645.27	2781.96	3622.38	2320.51	2611	3594.75	2638.5	2397.19	3361.15	2793.26	2677.73	3471.41	1904.31	2834.59	2824.64	2642.53	2813.18	3024.73	3501.07	2003.63	2639.06	3162.18
KMT2C	3959.11	3212.9	4134.66	4903.54	5315.86	4848.21	5569.78	6247.58	7994.86	6045.13	6305.2	6600.86	6933.41	6403.94	4979.92	5000.09	5234.5	5803.05	4628.75	8025.39	7141.39	6038.66	4169.51	3236.37	5044.83	5041.07
MCOLN3	22.5996	35.1717	14.6987	23.0522	10.7319	121.306	102.495	63.3259	131.623	71.1192	54.0247	203.606	83.7453	42.2639	81.1994	133.838	30.4271	37.4805	43.4726	72.0204	59.3325	48.6118	124.424	40.1618	103.795	44.1646
CCDC85A	0	4.08974	1.72926	1.64659	0	4.04355	0.899076	0	0	0.923626	0	2.51365	0	0	0	0	0	0	1.08682	1.77828	3.06892	0	0	0	0	0
PUM2	5639.02	5050.01	6045.49	6011.7	4914.01	5261.67	5715.43	5503.28	5881.1	4786.23	6194.54	5443.74	4921.78	6068.71	5955.24	5616.99	5760.16	5679.9	5115.64	6325.35	4519.5	5148.35	6435.61	4684.43	5487.76	4612.05
MRPL43	561.642	681.35	713.319	607.591	593.831	652.022	598.785	505.74	452.392	502.453	560.288	574.789	584.472	533.101	656.977	494.571	566.573	603.971	572.752	472.134	564.682	471.714	566.525	697.254	613.519	670.04
ITIH4	33.4809	22.0846	24.2096	32.9318	34.5805	36.3919	31.4677	26.8918	35.0994	24.0143	25.2696	26.8123	23.5534	20.1714	16.609	30.3226	37.7715	13.9213	17.3891	26.6742	20.4595	34.2083	48.9753	41.2774	31.8578	39.1172
ITIH1	14.2294	22.9025	30.262	21.4057	22.6562	30.3266	9.88984	18.2171	18.5247	10.1599	5.2282	21.785	33.1492	6.7238	19.3771	5.22803	22.0334	19.2757	15.2154	16.0045	25.5744	17.1041	3.97097	45.7398	29.8024	20.1895
C4orf27	334.809	313.274	290.515	333.434	177.672	301.244	272.42	265.448	208.646	245.685	318.92	326.775	299.215	391.901	296.193	283.359	301.123	262.363	279.312	345.876	207.664	247.56	259.436	321.294	323.716	256.155
ZFR	3384.08	2750.76	3098.83	2775.33	3539.14	2958.87	3200.71	3030.97	3153.1	3244.7	3373.93	3013.03	3304.45	3354.22	3158.47	3444.23	3515.9	3137.65	3859.28	3484.54	3453.56	3247.09	3886.25	2992.05	3477.64	3950.84
ZNF280C	195.026	107.151	136.611	116.908	206.291	232.504	251.741	229.882	254.471	244.761	237.883	248.852	218.087	264.149	232.525	228.988	209.842	189.544	234.752	190.276	187.204	245.76	135.013	130.526	164.427	161.516
NPFFR2	0	0	0.864629	0	0	0	0	0	0	0	0	0	0	0	0	0	0	0	0	0	0	0	0	0	0	1.26185
PHF21B	0	0	0	0	0	0	0.899076	0	0	0	0.871366	0.837885	0	0	0	0	0	0	2.17363	0	0	0	0	0	0	0
TRAF1	3788.36	4451.27	3870.94	4319.83	3066.94	3851.48	5155.3	2993.67	2728	5187.09	5172.43	3325.56	3412.62	3561.69	3148.32	3938.8	2077.43	3845.5	3607.14	3850.87	2986.06	3131.86	3103.97	2760.01	3583.49	2730.63
RC3H2	2365.42	2098.03	2159.84	2281.35	2678.2	2518.12	3111.7	2901.72	2852.8	3080.29	3334.72	2974.49	3176.21	2996.89	2932.4	3130.54	2669.19	2775.7	2910.49	3117.33	3165.08	3042.74	3061.62	2381.82	2751.07	2733.16
PCGF2	5.85916	8.17947	11.2402	4.11647	14.3092	26.2831	8.09169	20.8195	10.7248	8.31264	9.58503	46.9215	12.2129	11.5265	16.609	9.41045	30.4271	13.9213	15.2154	16.8937	28.6433	16.2039	6.61828	27.8901	19.5257	6.30923
KIFC1	0	0	0	0	0	0	0	0	0	0	0	0	0	0	0	0	0	0	0	0	0	0	0	0	0	0
IL17RB	82.8652	85.8844	73.4935	76.5664	60.814	112.208	61.1372	66.7959	63.3739	64.6538	63.6097	62.0035	51.4684	100.857	88.5811	58.5539	81.8383	62.1105	56.5144	69.353	90.0218	75.6183	45.0043	71.3988	119.21	49.212
TRAF3IP2	544.064	494.858	448.743	464.338	438.815	532.737	504.382	405.113	406.568	518.154	591.657	363.642	426.577	395.744	563.782	586.585	357.78	451.907	365.17	379.663	337.582	519.426	619.471	427.277	439.843	348.269
GYG2	0	0	0	0.823294	0	1.01089	0	0	0	0	0	0.837885	0.872347	0	0.92272	1.04561	0	1.07087	0	0	4.0919	2.70065	1.32366	0	0	1.26185
DCBLD2	75.332	57.2563	51.0131	88.0925	77.5081	52.5661	39.5594	124.049	151.122	106.217	66.2238	31.8396	114.277	43.2244	78.4312	76.3292	24.1318	72.8192	65.209	42.6788	135.033	79.2192	78.0957	82.5548	64.7432	58.0449
SERPINB3	0	0	0	0	0	0	0	0	0	0	0	0	0	0	0	0	0	0	0	0	0	0	0	0	0	0
SOAT1	1508.31	1346.34	2051.76	1947.09	1791.03	1926.75	1649.81	2502.68	2467.68	1572.01	1550.16	2055.33	1995.06	1908.6	1616.61	1612.32	2714.3	2008.95	1963.88	1975.67	1941.61	1894.96	1171.44	1628.78	1796.37	1800.65
PKP2	25.1107	71.9793	89.9214	60.9238	127.59	50.5443	34.1649	148.339	159.897	46.1813	36.5974	23.4608	47.1067	21.1319	58.1314	62.7363	220.334	101.733	84.7717	74.6879	95.1367	41.41	18.5312	95.9421	81.1859	56.783
MSH4	10.8813	4.08974	6.91703	9.05624	4.76973	3.03266	21.5778	12.1447	10.7248	14.778	16.556	21.785	14.8299	9.60543	17.5317	14.6385	13.6397	2.14174	6.5209	14.2263	8.1838	2.70065	7.94193	10.0405	3.08301	8.83292
F7	10.0443	6.54358	2.59389	4.11647	10.7319	4.04355	0	3.46991	2.92495	8.31264	2.6141	3.35154	0.872347	3.84217	0.92272	2.09121	0	11.7796	6.5209	4.44571	2.04595	1.80044	0	2.23121	0	1.26185
GDI2	6450.09	5711.72	6261.64	6993.06	7877.21	8363.07	5799.04	7590.44	6449.51	5901.97	7551.26	7449.63	6943.01	7391.38	9160.77	6024.78	9197.36	9497.55	7746.83	8317.03	9103.45	6506.78	5610.98	8389.36	7659.22	6227.21
PRDM1	1448.05	2291.07	1909.97	1182.25	5158.46	1702.33	4501.68	3367.55	2816.73	1732.72	3088.12	1593.66	2021.23	5001.55	1956.17	2713.35	3641.8	1353.58	2667.05	2056.58	1891.48	2189.33	2959.69	1493.8	3605.07	7219.02
ATG5	915.702	821.219	792.865	796.949	1188.85	947.201	1171.5	828.442	899.909	943.946	912.32	1034.79	859.261	1014.33	1026.99	1010.06	1083.83	879.185	1071.6	987.836	920.677	1028.05	1359.39	1039.74	1327.75	1307.27
TMCC3	491.332	379.527	721.101	381.185	1342.68	496.345	393.795	615.91	487.492	460.89	535.019	433.186	328.875	535.983	478.892	451.702	1007.24	564.349	902.057	500.587	648.566	495.12	585.056	420.583	503.558	1019.57
PITHD1	956.716	983.99	988.271	827.411	1465.5	1031.1	1445.71	1063.53	808.261	1275.53	979.415	927.538	1072.11	879.857	1081.43	1232.77	993.601	1103	1096.6	958.494	1178.47	1174.78	1258.8	954.959	956.761	995.596
MTA3	756.668	613.46	493.703	544.198	385.156	436.703	519.666	425.065	461.167	724.123	592.529	442.403	635.068	614.747	602.536	598.086	289.582	505.451	479.286	533.485	251.652	659.86	675.064	392.693	456.285	560.259
USP13	322.254	356.625	348.446	351.547	338.651	339.658	311.08	291.473	331.494	445.188	427.841	144.954	344.577	301.61	382.006	297.998	141.643	338.395	396.688	216.061	230.169	352.886	333.561	259.936	369.961	253.631
ATP11B	5286.63	3949.87	4267.81	4470.49	4386.96	4520.69	6011.22	5380.1	5060.16	5260.05	5723.13	5797.32	5097.99	6017.8	5294.57	5889.9	6296.3	4926	5260.19	5366.86	5052.47	5274.38	5318.45	4826.11	5011.95	4787.44
LAMC2	0.837022	0	1.72926	1.64659	0	0	0	0.867479	0	0	0	0	0	0	0	0	0	0	0	0	0	0	0	2.23121	0	0
CDK14	309.698	296.097	285.328	205	493.667	286.081	472.914	412.052	498.216	255.844	911.449	330.964	199.767	778.04	929.179	666.051	397.65	341.608	671.652	647.295	433.741	609.448	877.584	412.774	513.835	328.08
SEC61A1	4956.01	4991.11	5954.7	5137.36	6237.61	4982.66	5380.07	4719.95	4329.9	4066.73	4403.88	5115.29	4383.54	8158.85	5691.34	4464.74	5839.9	5095.2	5286.27	4875.16	5095.44	5228.47	3813.45	5428.54	6117.72	5810.8
PPP1R12A	3197.42	2841.55	3621.93	3240.49	3050.24	3072.09	3476.73	3216.61	3684.46	3245.62	3537.75	3863.49	3283.51	3709.62	3442.67	3305.16	4049.95	3129.08	3622.36	3987.8	3380.93	3286.7	3237.66	2994.29	3452.97	3813.3
RASGRF1	9.20724	14.723	7.78166	5.76306	16.6941	12.1306	9.88984	10.4097	12.6748	6.46538	8.71366	13.4062	7.85112	11.5265	11.0726	18.8209	4.19684	6.42522	10.8682	9.78055	8.1838	5.40131	2.64731	11.1561	5.13835	12.6185
CAMK2B	1.67404	2.45384	0.864629	0	0	0	2.69723	0.867479	0.974983	0	0	0	1.74469	1.92109	1.84544	1.04561	0	0	1.08682	1.77828	2.04595	2.70065	0	2.23121	2.05534	0
CROCC	1909.25	2117.67	1807.07	1548.62	1894.77	2655.6	2068.77	2107.97	2149.84	2116.03	1984.97	1711.8	2206.16	2090.14	2296.65	2359.93	1342.99	2232.76	1910.62	1866.31	1454.67	1810.34	1373.95	1517.22	1303.09	1144.49
POLR3E	1983.74	1957.35	1710.24	1786.55	1416.61	1733.67	2310.63	1705.46	1918.77	2644.34	1903.06	1537.52	2070.08	1750.11	1701.5	2249.1	1260.1	1717.68	1764.99	1654.69	1505.82	1814.84	2045.05	1364.39	1275.34	1708.54
ATP2B4	4814.55	4648.39	6329.95	5996.88	6696.7	4841.14	7031.68	5760.06	5406.28	4603.35	7004.04	7565.26	3988.37	8354.8	5883.26	4231.57	6000.43	5213	6066.61	7718.64	5903.59	5388.71	3126.47	3915.78	6679.85	5096.59
ZC3H11A	7010.9	6686.72	6794.26	7082.8	7507.55	7538.18	8039.54	8262.73	8137.21	8146.38	8377.31	7419.47	7518.75	8076.24	7927.09	8314.66	7765.19	7735.97	7170.81	7844.89	6882.57	7938.12	8063.71	6807.43	6471.24	6935.1
RIOK2	575.034	517.761	536.935	547.491	639.144	491.291	455.832	443.282	487.492	483.057	486.222	449.944	398.662	506.206	496.423	447.519	451.16	446.553	501.022	490.806	562.636	410.499	464.603	497.56	585.772	601.9
YIPF1	481.288	551.296	587.948	569.72	583.099	657.077	484.602	633.259	487.492	514.46	553.317	775.043	534.748	681.025	623.759	486.207	873.991	598.617	616.225	554.824	577.981	588.743	559.906	751.918	595.021	734.394
NDC1	709.795	601.191	564.603	598.535	419.736	514.541	492.694	507.475	535.266	558.794	508.006	555.518	626.345	811.659	627.45	544.761	585.459	471.183	518.411	597.503	498.189	508.623	616.823	595.733	523.084	483.287
DGKG	220.974	213.484	286.192	235.462	531.825	395.257	188.806	391.233	359.769	279.859	275.352	303.314	345.449	171.937	288.811	117.108	416.536	414.427	386.907	390.333	554.452	253.862	48.9753	362.572	249.724	264.988
FLYWCH1	2623.23	1587.64	2422.69	1205.3	1702.79	1729.63	1961.78	1719.34	1795.92	3003.63	1395.93	1500.65	2672	2475.32	1522.49	1887.32	2292.52	1661.99	2732.26	1522.21	3415.71	2340.57	1005.98	2937.39	1722.37	1957.12
UNKL	940.813	1181.12	1023.72	1012.65	827.548	1255.52	1278.49	1226.61	1443.95	1451.02	1266.97	1235.88	1446.35	1308.26	1101.73	1311.19	1063.9	1286.12	1072.69	1245.69	1092.54	1142.38	717.421	659.323	558.025	686.444
TBXAS1	2506.88	2347.51	3869.22	3055.25	4584.9	3766.56	1770.28	3772.66	2849.88	2513.19	1837.71	2781.78	3101.19	2179.47	2440.6	1285.05	7152.46	3276.86	4130.99	2630.08	5427.9	2598.93	870.965	4886.35	3141.59	3872.6
PARP12	2500.19	2654.24	2631.07	3068.42	2864.22	3065.01	4320.96	4340.86	4037.41	2563.99	2655.05	6724.86	4092.18	3396.48	4014.76	5674.5	6595.33	2392.32	4673.31	5355.3	4227.95	5310.39	6018.66	6043.24	5026.33	4354.63
ALDH18A1	1023.68	930.006	987.406	861.989	598.601	806.688	974.599	645.404	609.364	754.603	1198.13	1013.84	691.771	1457.14	1097.11	915.951	644.214	723.908	835.762	1031.4	528.878	936.227	911.999	715.103	1000.95	781.082
TARBP1	2239.87	2129.93	1214.8	1952.85	2242.97	1967.19	1984.26	1764.45	2147.89	2185.3	1783.69	2104.77	2171.27	1765.48	1831.6	2232.37	1127.9	1794.78	1538.93	1516.87	1275.65	2029.99	2209.18	1493.8	1316.45	1278.25
PET112	344.016	306.73	301.756	343.314	228.947	270.918	239.154	281.931	273.97	218.899	252.696	325.937	291.364	315.058	368.165	256.173	280.139	284.852	259.749	304.086	300.755	320.478	281.939	342.491	321.661	277.606
MXD1	2196.35	1759.4	2304.24	1898.52	8078.73	3240.9	4317.36	4470.98	4644.82	4679.09	4475.34	4496.93	4591.16	4002.58	2708.18	5821.93	8532.17	4257.78	5046.09	3652.59	6613.53	5706.48	6016.01	5860.28	5710.76	7260.66
CDK17	1711.71	1302.17	1417.13	1368.32	2644.81	1443.55	2117.32	1674.23	1797.87	1880.5	1939.66	1581.93	1639.14	2281.29	1838.06	2380.84	2148.78	1474.59	2409.47	2037.91	1689.95	2064.2	2324.34	1365.5	1777.87	2417.7
DNAJC25	190.841	152.956	164.28	135.844	375.616	204.199	231.962	182.171	178.422	261.386	176.016	198.579	257.342	233.412	206.689	217.486	217.186	251.655	258.662	155.6	309.961	224.154	201.196	352.531	257.945	300.319
SLC2A3	4637.1	3627.6	4829.82	4506.71	20419.2	7868.74	16513.3	7363.16	7309.45	14492.6	16542	5584.5	11132.9	8031.1	11477.7	17084.2	7385.38	10775.1	15163.3	8665.57	12131.5	16377.7	13711.7	11207.4	14909.4	19339
PSD	153.175	143.141	100.297	100.442	127.59	152.644	168.127	90.2178	114.073	246.608	153.36	112.277	206.746	106.62	134.717	173.571	60.8541	171.339	103.248	112.032	125.826	194.447	180.017	118.254	69.8816	71.9252
CTDP1	1239.63	1352.88	1398.11	1164.96	1599.05	1762.99	1635.42	1678.57	1475.15	1388.21	1694.81	1877.7	1277.12	1749.15	1790.08	1501.49	2101.57	1882.59	1712.82	1827.19	1597.89	1651.9	1011.27	1391.16	1267.12	1265.63
YBX3	1975.37	2005.61	2650.09	2688.88	6110.02	3258.09	6690.93	5751.38	5534	2974.08	3624.88	2850.48	2997.38	2736.59	4262.97	6610.32	3637.61	3313.27	3411.52	3245.37	6092.84	5140.25	4751.92	3351.28	2011.15	3193.73
STYK1	21.7626	42.5333	85.5983	34.5784	57.2367	8.0871	44.9538	50.3138	43.8742	28.6324	19.1701	66.1929	20.064	54.7509	35.9861	28.2314	151.086	5.35435	26.0836	32.0091	16.3676	16.2039	27.7968	18.9653	38.0238	65.616
WNK1	6740.54	6604.11	8208.79	7898.69	7994.07	8095.18	10211.7	9118.07	9330.59	7392.71	10458.1	9395.2	8742.66	11160.5	9508.63	9330.99	8703.19	8208.22	9009.71	10448.3	8756.66	8947.27	5993.51	5534.52	7627.37	7836.06
RPS17P5	0.837022	0	0.864629	3.29318	0	0	0	0	0	0	0	0	0	0	0	0	0	0	0	0	0	0	0	0	1.02767	1.26185
CCAR1	2562.96	2478.38	2455.55	2444.36	2465.95	2652.57	2884.24	2757.71	3079	3110.77	2745.67	2792.67	3195.41	3093.91	2690.65	2916.19	2536.99	2561.52	2619.23	2723.44	2388.65	2833.89	2414.35	2118.54	2330.76	2437.89
OGFR	2876.01	3424.74	3088.46	2866.71	4313.03	4044.56	3162.95	4389.44	4014.01	3584.59	2685.55	4249.75	4537.07	3412.81	3306.11	2933.97	6959.4	4425.91	5008.05	3575.24	4569.63	4241.83	1789.58	3651.38	3010.05	3790.58
GNA15	319.742	532.484	797.188	527.732	1485.77	701.556	710.27	721.742	618.139	690.873	503.65	725.608	918.581	413.033	515.801	447.519	705.068	959.5	910.752	530.817	1144.71	856.107	232.963	903.641	710.12	994.334
CREB3L3	0	1.63589	1.72926	0	0	5.05443	11.688	0	0.974983	0	1.74273	2.51365	0	0	1.84544	3.13682	3.14763	0	2.17363	1.77828	0	1.80044	0	0	0	0
PIGV	308.024	251.11	303.485	276.627	232.524	330.56	250.842	248.966	236.921	231.83	241.368	299.963	217.214	205.556	307.266	217.486	308.467	222.741	224.971	271.188	206.641	205.25	180.017	219.774	195.257	217.037
PTPRU	8.37022	8.99742	6.0524	27.992	10.7319	19.2069	16.1834	14.7471	9.74983	10.1599	9.58503	14.244	15.7022	10.566	8.30448	6.27363	103.872	6.42522	19.5627	11.5588	5.11487	27.0065	5.29462	32.3526	9.24903	8.83292
SNRNP40	622.745	604.463	712.454	690.744	646.298	657.077	638.344	648.874	670.788	617.906	746.761	855.48	719.686	877.936	780.621	665.005	784.808	607.184	637.961	776.22	611.739	658.96	643.297	506.485	655.653	536.284
RIMBP2	0	0.817947	0.864629	3.29318	0	41.4464	1.79815	0	0	0.923626	20.0414	0	0	7.68434	15.6862	429.744	1.04921	0	0	21.3394	21.4825	40.5098	430.188	0	0	3.78554
COL11A1	0	0	0	0	0	0	0	0	0	0	0	1.67577	0	0	0	0	1.04921	0	0	0	0	0.900218	0	0	0	0
QSER1	589.264	469.502	575.843	655.342	766.734	744.013	603.28	854.466	931.109	725.047	670.08	930.89	818.261	757.868	692.963	709.966	1187.7	738.901	757.511	962.94	892.034	812.897	570.496	730.722	681.345	622.09
MPC1	657.899	709.978	577.572	645.463	885.977	697.512	666.216	667.091	597.665	835.882	546.346	656.902	721.431	780.921	616.377	567.764	878.188	671.436	960.745	784.223	1004.56	670.663	679.035	914.797	888.934	810.105
ACAA1	1281.48	1418.32	1552.01	1532.97	1755.26	1580.02	1255.11	1537.17	1268.45	1290.31	1335.8	1557.63	1349.52	1182.43	1425.6	1222.31	1733.29	1144.76	1771.51	1550.66	1972.3	1364.73	1050.98	1782.74	1594.94	1442.29
BCAT1	256.966	157.046	282.734	346.607	162.171	170.84	98.8984	652.344	679.563	213.358	121.991	263.934	295.725	419.757	266.666	156.841	1278.99	270.93	492.328	290.749	734.496	302.473	74.1247	437.317	319.605	572.878
HDAC7	4570.98	4926.5	3908.99	4314.89	4169.94	4995.8	4178.01	4007.75	3614.26	5908.44	4628.7	4966.98	5059.61	4845.94	5555.7	5438.2	4102.41	5067.36	3715.82	4375.46	3744.09	5032.22	3501.07	4356.44	3348.15	2736.94
LZTS1	20.0885	35.1717	26.8035	32.1085	15.5016	53.577	146.549	39.0365	32.1744	23.0907	26.141	5.86519	24.4257	16.3292	34.1406	29.277	5.24604	79.2444	73.9035	42.6788	42.9649	44.1107	13.2366	17.8497	51.3835	98.4239
PRDM6	0	0.817947	0	0	0	1.01089	0	0	0.974983	0	0	0	0.872347	0	2.76816	0	0	0	0	0	0	0.900218	0	1.11561	0	0
WNT8A	0	0	0	0	0	0	0	0	0.974983	0	2.6141	1.67577	0	0	0	0	0	0	0	0	1.02297	0	2.64731	0	0	0
SPAG4	13.3924	22.9025	21.6157	12.3494	147.862	32.3484	41.3575	30.3618	47.7742	36.9451	53.1533	28.4881	45.362	52.8299	40.5997	75.2836	40.9191	35.3387	47.8199	27.5634	52.1717	68.4166	99.2742	10.0405	19.5257	65.616
NCKAP1	133.087	145.595	198.865	209.94	232.524	155.677	169.925	257.641	182.322	209.663	348.546	211.985	118.639	202.675	128.258	127.564	118.561	125.292	290.18	200.057	366.225	171.041	108.54	134.988	285.692	98.4239
MRPS35	986.012	862.116	886.245	872.692	958.716	836.003	717.463	735.622	642.514	663.164	724.976	876.427	772.899	755.947	962.397	697.419	863.499	722.838	904.231	812.675	786.668	793.992	1060.25	962.768	1104.75	728.085
GUCY1B3	131.412	85.8844	205.782	200.884	176.48	205.21	92.6049	283.666	143.323	125.613	284.065	129.872	116.894	155.608	167.012	118.153	242.367	73.8901	399.948	342.319	447.04	129.631	63.5355	103.751	199.368	121.137
SFSWAP	2299.3	2820.28	2197.02	2196.55	2671.05	2722.32	2898.62	2747.3	2894.72	2956.53	2507.79	2216.2	2846.47	2539.68	2771.85	2894.24	2324	2774.63	2690.96	2560.73	2311.92	2586.33	2205.21	2120.77	1973.13	2273.85
TNK2	5012.09	5680.64	4960.38	4618.68	7108.09	7314.78	7596.3	8064.08	7833.99	7377.93	6591.01	8408.17	8620.53	6368.4	7552.47	8223.69	8950.8	7780.94	8701.05	7813.77	8060.02	9421.68	4718.83	6594.35	5045.86	5369.15
MON2	2384.68	2101.31	2285.21	2277.23	1842.31	2341.21	2281.86	2571.21	2944.45	2245.34	2192.36	2746.59	2369.29	2838.4	2505.19	2110.03	2604.14	2310.94	2201.89	2563.39	2023.44	2435.99	1982.84	2034.86	2330.76	2222.11
CDH3	8.37022	1.63589	0	5.76306	11.9243	9.09798	3.59631	6.07235	3.89993	5.54176	7.84229	1.67577	6.10643	5.76326	2.76816	3.13682	6.29525	4.28348	0	3.55657	5.11487	0	2.64731	2.23121	2.05534	1.26185
ARSF	0.837022	0	0	0	0	0	0	0	0	0	0	0	0	0	0	0	0	0	0	0	0	0	0	1.11561	0	0
GPBP1	3607.57	3246.43	3525.09	3461.13	4137.74	3747.36	4846.92	3651.22	3757.58	3739.76	4066.66	4588.26	3603.66	3906.53	4560.08	4614.26	4124.44	3741.62	4061.43	4050.93	3330.81	4343.55	5683.78	4176.83	4668.7	3863.77
DGAT2	139.783	272.376	316.454	237.109	410.197	373.017	224.769	433.739	342.219	469.202	553.317	482.622	344.577	292.966	328.488	290.678	551.884	557.924	195.627	255.184	241.422	267.365	244.876	451.82	220.949	290.224
ZNF112	16.7404	17.9948	12.9694	11.5261	1.19243	11.1198	6.29353	15.6146	25.3496	4.61813	8.71366	7.54096	5.23408	2.88163	16.609	4.18242	4.19684	7.49609	3.26045	10.6697	4.0919	3.60087	2.64731	4.46242	3.08301	2.52369
CS	3333.86	3388.75	3289.05	3309.64	4431.08	4111.28	3144.97	3412.66	3157	3426.65	3190.94	3247.64	3750.22	3609.72	3786.84	3254.97	3583.05	3888.33	3762.56	3130.67	3919.02	3314.6	2832.62	3432.72	3176.53	2966.6
LTK	424.37	688.711	603.511	433.053	946.791	517.574	276.916	632.392	435.817	768.457	246.597	217.85	137.831	361.164	526.873	370.144	83.9367	792.444	485.807	342.319	202.549	276.367	213.109	307.907	525.139	369.721
MRPS24	611.863	613.46	608.699	538.435	548.519	520.607	570.913	481.451	384.143	520.925	497.55	445.755	541.727	594.576	525.028	453.793	398.699	580.412	514.064	434.79	535.016	537.43	635.355	709.525	658.736	681.397
ELMO2	2098.41	1958.98	2261.87	1979.2	2179.77	1931.8	2100.24	2059.39	1910.97	1726.26	1745.35	2686.26	1694.97	2050.76	1975.54	1832.95	3011.23	1380.35	2417.08	2522.49	2489.92	1902.16	1765.76	1796.13	2089.25	2114.85
WAPAL	3631.84	3007.59	3227.66	3289.88	3142.06	3503.73	4054.83	3597.43	3757.58	3644.63	4274.92	3488.11	3857.52	4029.48	3767.47	3727.58	4019.52	4167.83	3883.19	3923.78	3444.36	3622.48	3505.04	3366.9	3915.42	3504.14
VMP1	2480.93	2817.01	4123.42	3665.31	3306.61	3333.91	2647.78	4974.99	4240.2	3809.04	3670.19	4706.4	4270.14	2858.58	2986.85	2444.63	6746.41	4027.54	3521.28	3569.9	4519.5	2859.09	2420.97	5454.2	2897	3620.23
APPBP2	1198.62	1127.95	1125.75	1130.38	1126.85	1360.65	1233.53	1152.88	1351.33	1232.12	1235.6	1179.74	1232.63	1223.73	1169.09	1291.32	1250.66	1189.74	1160.72	1159.44	943.183	1233.3	1400.43	1007.39	1120.16	1094.02
POLD1	758.342	723.883	740.987	732.732	680.879	795.568	800.178	783.333	745.862	805.402	835.64	840.398	908.985	834.712	931.947	881.446	792.153	820.287	745.556	767.329	665.957	790.392	585.056	620.277	645.377	560.259
SEZ6	3.34809	3.27179	3.45852	3.29318	8.34703	19.2069	11.688	6.07235	19.4997	14.778	19.1701	14.244	6.97877	11.5265	7.38176	13.5929	9.44288	2.14174	7.60771	15.1154	9.20677	10.8026	3.97097	3.34682	2.05534	7.57107
EIF4B	22454	17826.3	19045.2	16546.6	23104.6	20952.7	20945.8	16846.4	15464.2	24742.1	22179.7	11435.4	18385.6	16157.3	17321.3	16870.8	10591.8	24747.8	16032.7	15780.5	20575.1	16147.2	18066.6	14903.4	17773.6	13867.7
SLC6A16	158.197	207.759	160.821	179.478	162.171	209.254	187.907	227.279	303.22	195.809	270.995	206.12	167.491	248.781	218.685	309.499	176.267	222.741	265.183	236.512	157.538	289.87	250.171	99.2889	102.767	121.137
GLTSCR1	821.956	812.221	624.262	719.559	1895.97	1706.38	2239.6	1708.07	1901.22	2502.1	1819.41	1620.47	2051.76	1958.55	1825.14	2194.73	1858.15	1981.11	1838.89	1758.72	1811.69	2167.73	763.749	774.23	845.772	1005.69
SPHK2	274.543	303.458	268.9	231.346	351.768	389.191	292.2	341.787	365.619	340.818	302.364	400.509	348.939	457.218	409.688	323.092	557.13	421.923	354.302	383.22	368.271	330.38	152.22	263.283	228.143	222.085
RPL18	19455.7	21471.1	17146.5	18075.4	20031.7	20147	18110.1	15001.3	13449.9	21114.1	17431.7	11992.6	17838.6	13764.6	16324.8	17147.9	10520.4	20369	14612.2	13149.5	15054.1	15483.8	21621.9	16181.9	15376	16019.1
CA11	215.115	200.397	359.686	162.189	195.559	207.232	212.182	169.158	183.297	226.288	252.696	180.145	122.129	182.503	234.371	242.581	120.659	233.45	185.846	204.502	161.63	190.846	267.378	159.532	174.704	171.611
ISOC2	243.573	213.484	247.284	197.591	314.802	296.19	265.228	216.002	171.597	208.74	267.509	326.775	264.321	509.088	331.257	288.587	267.548	191.686	279.312	213.394	231.192	256.562	182.664	228.699	210.672	239.751
U2AF2	5840.74	5577.58	5474.83	5293.78	7198.71	6075.43	5896.14	5388.78	5076.74	5839.17	5604.63	5806.54	5826.4	6100.41	6139.78	5870.03	5721.34	6440.21	6076.39	5384.64	6174.68	5984.65	4718.83	5559.06	4977.01	4875.77
EPN1	1657.3	1709.51	1987.78	1476.17	3819.36	3556.3	2852.77	3225.29	2629.53	3033.19	2471.19	3296.24	3240.77	2873.94	3068.04	2475.99	4064.63	3579.92	3972.31	3186.68	4633.05	3339.81	1080.1	2500.07	1926.88	1733.78
MED29	1566.91	1592.54	1783.73	1558.5	1754.07	1974.26	1634.52	1629.99	1465.4	1346.65	1762.77	2101.41	1643.5	1794.29	1936.79	1537.04	1952.58	1736.95	1754.12	1932.1	1706.32	1761.73	1363.37	1497.14	1445.93	1433.46
AHRR	6.69618	16.3589	25.0742	22.229	32.1957	54.5879	17.9815	29.4943	27.2995	36.0214	17.4273	32.6775	10.4682	14.4081	81.1994	32.4138	38.8207	17.1339	24.9968	24.896	30.6892	22.5055	23.8258	20.0809	29.8024	23.9751
GSC2	0	0	0	0	0	0	0	0	0	0.923626	0	0.837885	0	0	0	1.04561	0	1.07087	0	0	0	0.900218	0	0	0	0
ZNF275	734.905	691.165	660.577	689.921	685.649	847.123	906.269	691.38	887.235	791.548	924.519	756.61	785.112	1056.6	987.311	1070.7	614.836	627.53	770.553	834.904	561.613	901.118	831.256	580.115	602.215	705.372
MTMR1	2028.1	1984.34	1688.62	1830.18	1912.66	2109.72	2168.57	2061.13	2089.39	1893.43	2289.08	1969.03	2085.78	2114.15	2459.05	2276.28	1649.36	1758.37	2345.35	2016.57	1750.31	2185.73	2108.58	1666.71	1849.81	1514.21
GPC1	25.9477	27.8102	41.5022	24.6988	54.8519	39.4246	79.1187	48.5788	41.9243	45.2577	69.7093	67.8687	28.7874	46.1061	58.1314	56.4627	16.7873	32.1261	43.4726	38.2331	38.873	47.7116	30.4441	26.7745	38.0238	27.7606
ADCK1	281.239	255.2	327.694	280.743	259.95	316.408	198.696	242.027	269.095	264.157	226.555	218.688	259.087	227.649	255.594	215.395	243.416	263.434	271.704	223.174	268.019	272.766	202.519	292.289	221.977	198.11
HAGH	750.809	777.868	789.406	857.05	801.314	1071.54	1030.34	752.971	734.162	999.364	814.727	841.236	929.049	834.712	1039.91	931.635	839.367	1159.75	867.279	1002.95	1078.22	1082.96	754.484	871.288	756.365	633.446
RNF4	2265.82	2247.72	2493.59	2187.49	3170.68	2411.98	2454.48	2062	2170.31	2031.05	2479.04	2673.69	2421.63	2853.77	2552.24	2615.06	2823.42	2291.66	2751.82	2597.18	2155.41	2506.21	2901.45	1826.25	2663.72	2365.96
CASP8	5084.91	5506.42	4451.98	5469.15	5308.71	4433.75	5689.36	6034.18	5943.5	3830.28	5062.64	6120.75	4474.27	4789.27	4904.26	3525.78	6405.42	3393.59	4426.6	3518.33	4757.86	4390.36	2945.13	3268.72	4268.94	5266.94
LIMCH1	8.37022	18.8128	10.3755	41.1647	22.6562	7.07621	4.49538	14.7471	7.79987	14.778	6.09956	2.51365	22.681	9.60543	6.45904	1.04561	8.39367	20.3465	5.43408	12.448	5.11487	10.8026	6.61828	11.1561	4.11068	12.6185
ASUN	456.177	485.043	506.673	526.908	399.465	485.226	455.832	410.317	405.593	365.756	462.695	693.768	411.748	650.287	640.368	467.386	451.16	433.703	414.077	514.813	315.076	450.109	492.4	447.358	457.313	411.362
TM7SF3	1042.09	950.455	1007.29	1165.78	1032.65	1191.84	978.195	1107.77	1013.98	877.445	934.976	1224.15	1092.18	1148.81	1065.74	858.442	1480.43	1149.04	996.61	1114.98	1252.12	1166.68	878.907	1248.36	954.705	952.693
DLX3	0	0.817947	0	0	0	0	0	0	0	0	0	0	0.872347	0	0	0	1.04921	1.07087	0	0	0	0	0	0	0	0
SPA17	15.0664	15.541	12.9694	11.5261	17.8865	21.2286	9.88984	15.6146	15.5997	11.0835	9.58503	24.2987	23.5534	22.0925	20.2998	7.31924	15.7381	7.49609	8.69453	14.2263	11.2527	15.3037	9.26559	22.3121	21.5811	15.1421
TSPAN32	3985.06	3634.14	3505.21	2658.42	3503.37	4272.01	2162.28	3645.15	3436.82	3233.62	2332.65	3026.44	3717.07	3275.45	2867.81	2900.51	3149.72	3206.19	3177.85	2839.92	3709.31	2547.62	1601.62	2099.57	2029.65	2745.78
WISP2	2.51107	0.817947	0.864629	4.11647	0	0	0.899076	1.73496	0	4.61813	0	0.837885	0	1.92109	1.84544	0	1.04921	1.07087	0	0.889141	0	0	2.64731	1.11561	4.11068	2.52369
DMRT3	0	0	0	0	0	0	0	0	0	0	0	0	0	0	0	0	0	0	0	0	0	0	0	0	0	0
ST3GAL6	123.042	212.666	349.31	302.149	344.613	333.593	152.843	362.606	373.419	210.587	179.501	339.343	330.619	192.109	258.362	167.297	456.406	411.214	182.585	243.625	428.626	256.562	100.598	510.947	206.562	321.771
ATP2C2	11.7183	4.08974	9.51092	6.58636	4.76973	7.07621	5.39446	11.2772	13.6498	8.31264	10.4564	10.0546	11.3405	14.4081	3.69088	12.5473	34.6239	32.1261	6.5209	16.8937	8.1838	7.20175	9.26559	0	2.05534	3.78554
NGFR	15.0664	13.9051	19.0218	13.1727	40.5427	17.1851	9.88984	23.4219	21.4496	9.23626	19.1701	15.0819	17.4469	37.4612	14.7635	9.41045	130.102	17.1339	28.2572	19.5611	10.2297	19.8048	7.94193	4.46242	16.4427	12.6185
CDON	36.829	32.7179	24.2096	37.8715	19.0789	35.381	31.4677	29.4943	28.2745	55.4176	14.8132	21.785	46.2344	30.7374	19.3771	31.3682	13.6397	25.7009	15.2154	20.4502	24.5514	21.6052	31.7677	11.1561	26.7194	22.7132
TAF2	863.807	883.383	963.197	879.278	1105.38	1037.17	1120.25	938.612	1072.48	1000.29	1064.81	1226.66	1141.03	1203.56	1032.52	1048.74	1123.7	979.846	1135.72	1107.87	1020.93	1189.19	1069.51	961.652	1489.09	1051.12
HIPK2	3723.91	2391.68	2802.26	3698.24	6440.33	3722.09	3021.8	4680.91	4811.54	3567.04	3856.67	3506.55	3615.88	5153.31	3780.38	3509.05	7408.46	3677.37	4026.65	4398.58	5504.63	3933.95	2407.73	2444.29	3418.03	4535.07
TNPO3	1343.42	1165.57	1606.48	1377.37	1652.71	1469.83	1521.24	1403.58	1481.97	1257.06	1476.97	1502.33	1461.18	1637.73	1633.21	1367.65	1786.8	1339.66	1545.45	1482.2	1390.22	1427.75	1544.71	1308.61	1429.49	1544.5
MEF2BNB-MEF2B	0	0	0	0	0	0	0	0	0	0	0	0	0	0	0	0	0	0	0	0	0	0	0	0	0	0
RFXANK	570.012	629.819	731.476	610.061	789.39	623.717	601.482	575.138	507.966	619.753	583.815	672.821	593.196	619.55	668.972	579.266	643.165	657.514	620.572	565.494	601.509	604.046	558.583	742.993	664.902	521.142
TMEM161A	492.169	535.755	543.852	422.35	512.746	539.814	487.299	423.33	456.292	468.279	450.496	435.7	474.557	468.745	557.323	463.203	510.965	462.616	484.72	515.702	443.971	471.714	344.15	426.161	309.329	436.599
LPAR2	1080.6	1501.75	1610.8	1148.5	1488.16	1731.65	1180.49	1806.09	1430.3	1924.84	1298.34	1271.07	1612.97	1239.1	1260.44	1357.2	1354.53	1895.44	1663.92	1403.95	1956.95	1379.13	1099.96	1662.25	974.231	1394.34
CTSA	2653.36	3672.58	4933.57	4013.56	7018.66	5362.76	4618.56	6107.92	4882.72	4331.81	5073.09	6041.15	4773.48	4124.57	4602.53	3676.35	8143.96	6413.44	6582.85	5450.44	8962.28	5930.64	2178.74	7204.58	5374.71	5571.05
SUGP2	4654.68	4500.35	4054.25	4207.03	4598.02	4283.13	4655.42	4577.68	4621.42	4946.02	4240.94	4599.15	4291.07	4774.86	4179.92	4648.76	6016.16	4221.37	5009.14	4319.45	4524.62	4355.26	3575.19	3437.18	3403.64	4560.31
SLC12A2	382.519	283.828	401.188	324.378	414.966	388.181	449.538	457.161	436.792	392.541	539.376	426.483	356.79	606.103	522.26	464.249	464.8	328.757	445.595	491.695	381.57	361.888	473.869	222.006	306.246	273.82
SNX24	85.3763	80.1588	77.8166	85.6226	131.168	100.078	99.7975	117.977	93.5984	85.8972	115.892	111.439	83.7453	138.318	117.185	90.9677	103.872	119.937	129.331	141.373	191.296	89.1216	33.0914	94.8265	114.071	76.9726
EYA2	2.51107	4.08974	0.864629	4.93977	8.34703	5.05443	3.59631	0	3.89993	0.923626	4.35683	0.837885	4.36173	27.8557	20.2998	10.4561	0	4.28348	14.1286	3.55657	1.02297	6.30153	3.97097	3.34682	5.13835	7.57107
CNN2	7278.74	8493.56	8668.77	5781.17	8430.5	10098.8	8726.44	8051.07	7044.25	10252.3	9175.48	8532.18	8777.55	7681.46	11309.8	9501.42	6618.41	11977.7	6128.56	8643.34	7531.14	9356.87	7171.57	7751.23	7134.08	5290.92
ABCA7	4217.75	6818.41	6627.38	4641.73	6408.13	8680.49	6347.48	7200.94	6840.48	8245.21	4686.21	5014.74	6335.85	4882.44	9205.98	6715.93	5060.33	8405.26	4904.8	6697.9	6425.3	5824.41	4045.09	7740.07	5100.33	4605.74
SNCAIP	1.67404	5.72563	4.32315	0.823294	1.19243	7.07621	0	0	1.94997	0	0	0	0.872347	0.960543	3.69088	4.18242	0	0	0	0.889141	4.0919	0	0	3.34682	2.05534	0
DDX20	594.286	586.468	542.987	489.86	909.826	531.727	744.435	490.125	501.141	720.429	589.043	477.594	537.365	511.009	574.855	905.495	501.522	639.31	620.572	479.247	544.223	535.63	1101.28	486.404	520.001	720.514
BTBD1	2052.38	1824.84	1956.66	1792.31	2847.53	2144.09	2087.66	2317.9	2150.81	1953.47	2148.79	2469.25	2363.19	2408.08	2440.6	2266.87	2536.99	2159.95	2527.93	2251.31	2077.66	2113.71	2190.65	2148.66	2175.58	1934.41
FAR2	125.553	219.21	247.284	324.378	182.442	239.58	253.54	451.089	437.767	217.052	186.472	518.651	294.853	273.755	328.488	222.714	915.959	352.316	338	285.414	312.007	275.467	209.138	388.231	290.831	247.322
BCAS1	10.8813	51.5307	20.7511	22.229	17.8865	60.6532	22.4769	9.54227	9.74983	16.6253	27.0123	47.7594	16.5746	28.8163	38.7542	25.0945	23.0826	18.2048	41.299	24.896	48.0798	14.4035	34.415	59.1271	36.9961	23.9751
POU1F1	0	0	2.59389	1.64659	2.38486	1.01089	0	1.73496	2.92495	0	2.6141	0.837885	1.74469	1.92109	4.6136	0	0	3.21261	0	1.77828	4.0919	0.900218	0	0	0	1.26185
CHI3L2	404.282	479.317	272.358	632.29	145.477	445.801	389.3	289.738	238.871	300.179	472.28	528.705	350.683	978.793	572.087	615.862	218.235	202.395	308.656	368.104	171.86	580.641	647.268	584.577	354.546	273.82
SBNO2	2240.71	3068.12	2791.89	2576.91	4577.75	4132.51	6838.37	4096.23	3693.24	4723.43	5716.16	4729.86	4749.93	4549.13	4398.61	5037.73	4907.15	4523.36	4915.67	4505.28	4827.42	4881.88	2329.63	3123.7	2815.82	3396.89
PMS1	623.582	669.899	657.118	639.7	595.024	695.49	699.481	639.332	655.189	673.324	704.064	826.992	613.26	687.749	746.481	717.286	652.608	616.821	614.051	611.729	612.762	588.743	735.952	498.676	656.681	570.354
HMG20B	1001.92	1118.95	1121.42	1069.46	1534.66	1539.58	1281.18	1519.82	1132.93	1485.19	1320.12	1307.94	1456.82	1287.13	1476.35	1205.58	1239.12	1348.23	1658.48	1217.23	1926.26	1192.79	657.857	1169.15	987.591	986.763
CALCRL	57.7545	79.3409	70.035	96.3255	75.1232	55.5988	26.9723	178.701	177.447	42.4868	25.2696	165.063	92.4687	41.3033	83.0448	28.2314	231.875	94.2366	80.4244	70.2422	52.1717	51.3124	17.2075	83.6704	49.3282	95.9003
TAF11	667.107	746.786	611.293	704.74	728.576	724.806	759.72	659.284	635.689	732.436	680.537	640.982	751.09	730.013	754.785	770.611	697.724	672.507	712.951	590.39	654.704	689.567	775.662	783.155	727.59	740.703
ANKS1A	648.692	525.122	811.887	692.391	1304.52	785.459	716.564	932.54	949.634	628.066	663.109	737.338	850.538	649.327	690.195	621.09	1296.82	693.924	812.938	737.987	968.757	792.192	602.263	702.832	781.029	969.097
AP3D1	4152.47	4460.27	4973.35	4407.1	5137	5329.4	4812.76	5140.68	4510.27	4501.75	4389.07	5100.2	4385.29	5759.41	5186.61	4128.05	5642.65	4961.34	4913.5	4932.07	4655.56	4990.81	3003.37	4518.2	3704.75	3979.86
ZNF76	1854.84	2143.02	1917.75	1811.25	1922.2	2062.21	1948.3	1787.87	1777.39	1972.87	1718.33	1611.25	1808.37	1642.53	1742.1	1897.77	1482.53	1822.62	1672.61	1675.14	1327.82	1754.53	1806.79	1546.23	1499.37	1530.62
SLC9A3R2	79.5171	69.5255	89.0568	69.1567	139.515	103.11	57.5409	68.5308	58.499	87.7445	72.3234	58.6519	86.3623	67.238	82.1221	72.1468	108.069	112.441	85.8585	72.0204	86.9529	100.824	41.0333	45.7398	42.1345	42.9027
NTHL1	161.545	134.143	164.28	127.611	94.2021	110.187	145.65	121.447	103.348	145.009	126.348	156.684	107.299	195.951	170.703	125.473	125.905	110.3	140.199	120.034	115.596	125.13	112.511	153.954	139.763	98.4239
UHRF1BP1	1494.92	884.201	771.249	1048.05	1892.39	1108.94	1185.88	1619.58	1539.5	1749.35	1488.29	1168.85	1126.2	1365.89	1116.49	1340.47	1148.88	1004.48	1675.87	1401.29	2584.03	1114.47	1207.17	1231.63	1933.05	1369.1
GNAI3	2573.84	2302.52	2727.04	2397.43	3778.82	2416.02	2681.05	2349.13	2004.57	2588	2613.23	2729.83	2997.38	2705.85	2704.49	2542.91	3585.15	2731.79	3195.24	2875.48	3279.66	2264.05	3236.34	3410.41	4092.18	3159.66
IPO5	3276.94	2850.55	2867.11	2900.47	3006.12	2905.29	2922.9	2571.21	2532.03	3096	3095.96	2503.6	3288.75	3539.6	3257.2	2859.73	2187.6	3075.54	2648.57	2624.74	3395.25	2977.02	2872.33	2806.86	2958.66	2595.62
OAT	1465.63	1069.06	1334.12	1122.97	1941.28	1203.97	1503.26	1140.73	1019.83	980.891	1165.02	1056.57	1265.77	1344.76	1047.29	923.27	1639.91	1414.62	1580.23	844.684	1557.99	1249.5	1061.57	1721.38	1586.72	2022.74
WDR3	674.64	623.276	685.651	645.463	375.616	443.779	450.437	414.655	478.717	456.271	573.359	458.323	539.11	529.259	543.482	540.578	534.047	436.915	415.164	542.376	309.961	426.703	731.981	503.138	629.962	571.616
PKN2	1654.79	1284.99	1453.44	1588.96	2268.01	1959.1	1910.54	2009.08	2535.93	2198.23	1844.68	1895.3	2473.1	1749.15	1606.46	1807.85	2308.26	2057.14	1928.01	1714.26	2382.51	2224.44	1716.78	1850.79	1808.7	2239.78
WDR18	492.169	450.689	417.616	466.808	652.26	572.162	514.272	480.583	412.418	420.25	589.915	680.362	467.578	649.327	609.918	499.8	567.622	581.483	648.829	590.39	505.35	554.534	221.05	464.092	406.957	413.885
TRAM2	1201.13	963.542	1182.81	1142.73	1401.11	986.626	1495.16	1156.35	1157.3	1175.78	1317.51	1270.23	1143.65	3673.12	1779	1533.9	1255.9	1177.96	2058.43	1547.11	1415.8	1686.11	953.032	1627.67	1636.05	1581.09
NTN1	8.37022	4.90768	9.51092	7.40965	16.6941	12.1306	25.1741	18.2171	18.5247	13.8544	24.3982	18.4335	20.9363	12.4871	24.9134	30.3226	10.4921	7.49609	29.344	25.7851	12.2757	14.4035	17.2075	2.23121	7.19369	2.52369
GLP2R	0	0	0	0.823294	0	0	0	2.60244	2.92495	1.84725	0	0.837885	3.48939	0.960543	0	0	0	1.07087	3.26045	0	4.0919	0	0	1.11561	0	0
MCM10	38.503	16.3589	17.2926	20.5824	2.38486	16.1742	67.4307	10.4097	3.89993	11.0835	72.3234	82.9506	83.7453	220.925	72.8949	75.2836	45.116	6.42522	39.1254	37.3439	14.3216	54.9133	50.2989	52.4335	72.9646	65.616
DGKA	9998.23	10334.8	7363.18	9122.93	4976.02	8904.9	9425.92	6433.22	7941.24	11144.5	9361.08	6656.16	9914.22	6762.22	8467.8	10392.3	3543.18	8618.37	5471.03	7540.81	4526.66	8896.86	10733.5	7853.86	8394.01	6600.71
ERBB3	47.7103	20.4487	18.1572	27.1687	10.7319	15.1633	27.8714	13.8797	17.5497	43.4104	24.3982	33.5154	26.1704	17.2898	24.9134	29.277	4.19684	26.7718	16.3022	22.2285	10.2297	33.3081	31.7677	13.3873	20.5534	17.6658
ROPN1	0	0	0	0	0	0	0	0	0	0	0.871366	0	0	0	0	0	0	0	0	1.77828	0	0.900218	0	1.11561	0	0
ANKRD44	3596.68	2828.46	3064.25	3391.15	3774.05	3514.85	3990.1	4348.67	5296.11	4332.73	4357.7	3669.1	5025.59	4385.84	4399.53	3999.44	3559.97	3890.47	3933.19	4187.86	3929.25	4177.91	2996.76	2434.25	3234.08	3547.05
KARS	3666.99	3635.77	3451.6	3603.56	4223.6	3916.18	3896.6	3404.85	2925.92	3774.86	3531.65	3747.86	4168.94	3513.67	3868.97	3953.44	3943.98	3801.59	4017.96	3544.12	3867.87	4054.58	4256.88	4369.83	4289.49	3584.9
ADAT1	790.986	640.453	689.109	641.346	909.826	696.501	914.361	713.935	780.961	879.292	1082.24	1002.95	754.58	908.674	897.807	867.853	842.515	923.09	766.205	1088.31	892.034	762.485	824.637	611.352	720.397	921.147
PDIA5	168.241	195.489	188.489	208.293	321.957	188.025	364.126	184.773	184.272	244.761	206.514	237.959	213.725	614.747	331.257	277.086	187.808	249.513	221.71	205.392	307.915	303.374	189.283	378.19	350.435	383.601
TBC1D22B	442.785	473.591	449.607	463.515	510.361	529.705	711.169	476.246	487.492	561.565	540.247	735.663	506.833	522.535	599.768	540.578	599.098	545.073	581.447	571.718	574.912	621.151	520.197	542.184	621.74	434.075
NDUFB4	1134.17	1169.66	1074.73	1025	1249.67	1205.99	1294.67	1103.43	976.933	1233.04	1285.26	1193.15	1202.97	1337.08	1265.05	1279.82	1160.42	1351.44	1254.19	1034.07	1232.68	1190.99	1245.56	1296.33	1215.73	1270.68
SPEN	6195.64	4718.74	5386.64	6439.81	7777.04	6132.04	7447.05	7716.22	8646.15	7648.55	7563.46	7244.35	8524.57	6973.54	6350.16	7786.63	7900.54	7277.64	7362.09	7350.53	9139.26	9412.68	6425.02	6043.24	6948.08	7654.35
MYLK	146.479	173.405	350.175	408.354	280.222	389.191	201.393	602.03	341.244	180.107	556.803	314.207	157.895	382.296	223.298	118.153	437.52	153.134	821.633	376.107	2202.46	424.003	82.0666	182.959	157.233	190.539
ZC3H15	1707.53	1508.29	1612.53	1507.45	2433.75	1477.92	1851.2	1594.43	1457.6	1706.86	1615.51	1620.47	1741.2	1652.13	1588	1945.87	1860.25	1531.34	1923.66	1623.57	1855.68	1930.07	2925.28	2202.21	2108.78	2478.26
MAP2K4	889.755	824.491	1043.61	952.552	791.775	940.125	879.297	1024.49	970.108	876.521	955.017	1063.28	905.496	972.069	1149.71	885.628	1291.58	1155.47	907.491	972.721	1008.65	959.633	848.463	1028.59	901.267	835.342
TMEM206	330.624	423.697	427.991	358.956	443.585	414.464	252.64	446.751	414.368	288.171	282.323	380.4	328.002	376.533	398.615	300.089	486.833	352.316	396.688	414.34	360.087	399.697	304.441	462.976	379.21	350.793
SNAP91	0	0.817947	0.864629	0	0	0	0	0	0	0.923626	0	0	0	0	0.92272	0	0	12.8504	0	0	0	0.900218	0	0	0	1.26185
SLK	3027.51	2463.66	2948.39	2964.68	3198.1	2631.34	2996.62	3183.65	3088.75	3248.39	2892.93	2838.75	3007.85	3043	2849.36	2908.88	3328.09	3431.07	3640.83	3379.63	3237.72	2792.48	2741.29	2832.52	3020.32	3168.49
CYB5R4	1489.06	1848.56	1724.07	1634.24	2076.02	1680.09	1684.87	2237.23	1955.82	1973.79	1704.39	1970.7	1916.55	1537.83	1726.41	1547.5	2978.7	2370.91	2261.66	1735.6	2738.5	1912.96	1874.3	3004.33	2443.8	2620.85
COL17A1	4.18511	0.817947	0	4.93977	3.5773	6.06532	3.59631	2.60244	6.82488	7.38901	3.48546	5.02731	6.10643	2.88163	19.3771	14.6385	101.773	85.6696	1.08682	13.3371	8.1838	5.40131	13.2366	3.34682	0	1.26185
GSTO2	29.2958	15.541	16.428	13.1727	28.6184	24.2613	33.2658	26.0244	38.0243	49.8758	41.8256	27.6502	34.0215	23.053	14.7635	34.505	28.3286	24.63	16.3022	40.0114	20.4595	26.1063	25.1495	20.0809	9.24903	13.8803
SEC61A2	225.159	169.315	190.218	241.225	257.565	234.526	267.925	282.798	424.118	333.429	312.82	292.422	358.534	370.77	251.903	329.366	263.351	236.662	253.228	266.742	226.077	344.784	264.731	194.115	232.253	247.322
PRKCQ	1426.29	1516.47	1126.61	1137.79	1677.75	1342.46	2254.88	1191.05	1153.41	1959.94	1532.73	1519.08	1599.88	1754.91	1612.91	1985.61	1078.59	1452.1	1491.11	1355.05	1058.78	1651	2615.54	1256.17	1929.96	2035.36
TLE2	425.207	398.34	352.769	295.563	317.187	509.487	568.216	275.858	334.419	639.149	345.932	202.768	644.664	257.425	458.592	564.627	107.019	568.632	233.665	370.772	208.687	359.187	307.088	261.052	283.637	225.87
ASB1	1462.28	1436.32	1469.87	1293.4	955.138	1212.05	1170.6	1039.24	979.858	1163.77	1126.68	904.078	990.113	1209.32	1075.89	1117.75	1187.7	1088	1057.47	951.381	917.608	1022.65	1168.79	1012.97	1014.31	972.883
FAM107B	7713.16	7736.96	7210.14	6732.08	7142.67	6785.07	10463.5	6611.05	5724.13	8422.55	10288.2	7091.86	7017.16	8295.25	8670.8	9421.95	6358.21	8704.04	7928.32	7778.21	7825.76	7815.69	10512.5	7928.61	10079.4	7052.45
ME1	25.1107	47.4409	74.3581	95.5022	113.281	59.6423	29.6695	70.2658	61.4239	72.9665	26.141	165.063	32.2768	39.3823	28.6043	12.5473	49.3128	186.331	60.8617	29.3417	57.2866	55.8135	9.26559	73.63	64.7432	45.4264
TBC1D1	2602.3	2309.06	2784.11	2683.12	3714.43	3179.24	2576.75	4155.22	3417.32	2553.83	3494.18	3457.11	2841.23	3833.53	3993.53	3367.9	4612.32	2962.03	4020.13	3592.13	3369.68	3738.61	3122.5	3500.77	3295.74	2815.18
CDK13	2417.32	2215	2320.66	2263.24	3379.35	2727.37	3164.75	2944.22	3007.82	2903.88	3052.39	2814.45	2742.66	2994.01	3216.6	3210.01	3090.97	2974.88	3215.89	3309.38	2848.98	3073.34	3240.31	2352.81	2396.53	2535.05
MTHFD2	634.463	511.217	751.363	652.049	924.135	664.153	739.94	654.946	551.84	528.314	561.16	827.83	861.878	1038.35	769.549	629.455	1542.34	600.758	962.919	670.413	811.219	757.984	804.783	972.808	1426.41	1139.45
SLC9A7	271.195	284.646	278.411	323.555	562.828	370.996	320.071	562.994	657.139	327.887	639.583	259.744	338.47	291.044	598.845	552.08	99.6748	369.45	310.829	409.894	379.524	476.215	448.719	236.508	197.313	141.327
FOXJ2	1433.82	1473.12	1750.87	1537.91	2269.2	1977.29	1681.27	2043.78	1974.34	1886.97	1630.33	1478.87	1958.42	1687.67	2014.3	1746.16	1950.48	2210.28	2079.08	2071.7	1872.04	1793.23	1199.23	1556.27	1232.18	1694.66
YBX1	12647.4	12411.5	12103.9	11292.3	25473.9	18940	18416.7	17183	14758.3	18899.2	17288.8	18478.7	20598.7	18281.1	17551.1	17718.8	17457.8	17982.1	22155.8	17515.2	24783.6	18176.3	13112.1	15763.5	15071.8	14112.5
PDE4A	837.859	741.878	861.171	752.491	2017.6	1378.85	878.398	1263.92	1012.03	862.667	582.944	1255.99	897.645	1266.96	781.544	630.5	2114.16	1098.71	1644.35	1165.66	1755.42	1064.06	349.445	903.641	762.531	1336.29
PPP2R5A	2906.98	2618.25	3220.74	2806.61	4261.75	4192.15	3477.63	3993.87	3322.74	3246.55	3385.26	4161.77	2945.91	3886.36	3667.81	3177.6	5375.1	3453.56	4004.92	3939.78	3938.45	3653.99	2946.46	4016.18	3019.29	3000.67
CTNNA2	0	0.817947	3.45852	1.64659	13.1168	4.04355	0	1.73496	1.94997	6.46538	0.871366	0	0.872347	0.960543	0	0	1.04921	1.07087	0	1.77828	2.04595	0	0	4.46242	0	1.26185
ELAVL1	1259.72	1121.41	1289.16	1210.24	1316.45	1507.23	1411.55	1460.83	1370.83	1170.23	1551.03	1723.53	1385.29	1901.87	1813.15	1364.52	1637.81	1333.23	1517.2	1678.7	1556.97	1572.68	1155.55	1159.11	1187.99	1051.12
TIE1	56.9175	40.0794	67.4411	35.4017	15.5016	131.415	19.7797	34.6991	16.5747	33.2505	4.35683	26.8123	19.1916	30.7374	21.2226	37.6418	322.107	8.56696	44.5595	9.78055	60.3555	61.2148	35.7387	46.8554	4.11068	44.1646
DIP2B	1997.13	1510.75	1796.7	1807.95	2802.22	1841.84	2294.44	2658.82	3418.29	2396.81	2578.37	2315.08	3226.81	2118.96	2364.93	2922.47	2721.65	2322.72	2370.35	2298.43	2562.55	2850.99	3412.38	2106.26	2178.66	2993.1
SMARCD1	2147.8	2115.21	1956.66	2011.31	2998.97	2461.51	2754.77	2217.28	1991.89	2500.26	2439.82	2420.65	2121.55	2650.14	2758.93	2991.48	2274.68	2247.76	2736.6	2283.31	2465.37	2612.43	2655.25	2063.87	2187.91	2238.51
KDM4A	807.726	819.583	1111.91	838.114	868.091	801.633	783.096	790.273	773.162	652.08	885.308	938.431	774.644	1032.58	1000.23	854.26	1059.7	799.94	905.318	901.589	761.093	843.504	776.986	790.964	914.626	858.055
NFYC	1324.17	1555.74	1726.66	1471.23	1596.67	1868.12	1617.44	1696.79	1738.39	1538.76	1732.28	1756.21	1642.63	1679.03	1950.63	1528.68	2064.84	1825.83	1807.38	1790.73	1701.21	1672.61	1303.8	1675.64	1584.67	1544.5
ZMYND12	7.5332	4.90768	9.51092	9.87953	11.9243	8.0871	4.49538	18.2171	4.87492	4.61813	11.3278	9.21673	20.064	11.5265	5.53632	10.4561	13.6397	13.9213	17.3891	8.89141	19.4365	13.5033	18.5312	14.5029	13.3597	11.3566
SLC9A3	507.235	333.722	116.725	160.542	129.975	169.829	224.769	189.11	260.32	222.594	459.21	321.748	179.703	121.989	125.49	174.616	119.61	236.662	209.756	156.489	153.446	135.933	48.9753	49.0867	69.8816	94.6384
NGEF	0.837022	0.817947	0.864629	2.46988	2.38486	1.01089	3.59631	1.73496	0.974983	3.69451	2.6141	2.51365	0.872347	2.88163	0	1.04561	1.04921	3.21261	2.17363	4.44571	3.06892	0.900218	3.97097	0	4.11068	1.26185
ASPM	83.7022	61.346	70.035	73.2732	45.3124	71.773	200.494	42.5065	38.9993	108.064	220.456	364.48	262.576	814.54	205.767	244.672	135.348	32.1261	155.415	163.602	88.9988	225.055	113.834	111.561	248.696	166.564
CD84	2726.18	2919.25	2949.25	3314.58	2688.93	3103.42	4405.47	3952.23	4427.4	3495.93	4958.07	4378.79	3111.66	4124.57	3907.72	3740.13	2454.1	4037.18	3888.63	4781.8	3085.29	3840.33	3371.35	2458.8	4364.51	4680.18
ELOVL1	1302.41	1558.19	1788.92	1588.96	2114.18	2024.81	1293.77	1535.44	1375.7	1207.18	1160.66	1886.92	1462.05	1412.96	1623.99	1151.21	2193.9	1522.78	1759.56	1558.66	1773.84	1256.7	959.65	1575.24	1234.23	1265.63
SPI1	4707.41	5309.29	6391.34	5303.66	14609.7	11202.6	7165.64	11248.6	9318.89	10358.5	6659.85	12549	12970	6707.47	8382.91	7294.15	16991.9	13189.9	14009.1	11063.6	18139.4	11511.1	3025.88	11345.7	7382.78	6827.85
ZNRD1	190.004	223.3	210.97	186.888	94.2021	140.513	105.192	117.11	98.4733	109.912	134.19	146.63	95.9581	145.042	131.026	132.792	117.511	107.087	109.768	127.147	81.838	91.8223	219.727	149.491	179.842	185.491
MPPED2	30.9698	7.36152	8.64629	22.229	8.34703	8.0871	4.49538	18.2171	24.3746	33.2505	9.58503	3.35154	2.61704	5.76326	11.9954	16.7297	9.44288	6.42522	13.0418	12.448	8.1838	18.0044	23.8258	3.34682	3.08301	11.3566
CLDN18	0	0	0	0.823294	0	0	0	0	0	0	0	0	1.74469	0	0	0	0	0	0	0	2.04595	0	1.32366	0	0	0
ZBTB11	1528.4	1236.74	1335.85	1470.4	1807.73	1493.08	1674.08	1508.55	1684.77	1818.62	1478.71	1389.21	1783.95	1526.3	1322.26	1533.9	1795.2	1595.6	1669.35	1574.67	2039.81	1551.98	1986.81	1382.24	1508.62	1838.51
ATXN3	677.988	604.463	606.97	624.88	897.901	894.635	881.095	975.046	1133.91	938.404	798.171	987.028	1004.07	838.554	846.134	799.888	1021.93	878.114	883.581	946.935	1045.48	858.808	602.263	750.803	672.096	782.344
GOLGA5	986.012	1051.88	1084.24	998.656	1018.34	1303.03	1148.12	1181.51	1036.41	986.433	1215.56	1267.72	1063.39	1353.4	1305.65	1134.48	1304.17	1335.38	1200.93	1294.59	1118.11	1238.7	1224.38	1361.04	1316.45	1133.14
FGFR2	9.20724	15.541	30.262	5.76306	69.1611	42.4573	24.2751	25.1569	18.5247	67.4247	91.4934	12.5683	22.681	17.2898	35.9861	23.0033	3.14763	23.5591	39.1254	55.1268	66.4934	24.3059	14.5602	11.1561	24.6641	29.0224
LRRC40	357.408	320.635	329.424	307.089	627.219	440.747	479.208	447.619	522.591	504.3	442.654	519.488	498.11	509.088	452.133	489.343	479.488	426.206	502.109	436.568	455.224	447.408	348.121	348.069	412.096	461.835
ISOC1	293.795	284.646	318.184	296.386	361.307	382.115	315.576	324.437	269.095	292.79	380.787	359.453	280.023	432.244	276.816	297.998	381.912	291.277	311.916	376.107	291.548	268.265	293.852	257.705	366.878	262.464
EML1	0.837022	0	0	0.823294	0	2.02177	0.899076	2.60244	0.974983	0	0.871366	0	0	0	0	0	0	2.14174	0	0	1.02297	0	3.97097	0	1.02767	3.78554
TRMT11	357.408	371.348	265.441	358.956	312.417	323.484	396.493	336.582	369.519	437.799	362.488	335.154	390.811	325.624	299.884	425.562	237.121	325.545	345.608	328.093	207.664	365.489	401.068	305.676	329.882	328.08
THUMPD1	2504.37	1843.65	1916.02	1889.46	3186.18	2463.53	2948.97	2348.26	2181.04	2905.73	2841.52	1945.57	2577.78	2455.15	2811.53	3029.12	2491.87	2747.85	2885.5	2219.3	2598.36	3039.14	3331.64	2570.36	2535.26	3075.12
MSANTD3	164.056	168.497	152.175	163.012	317.187	178.927	239.154	218.605	161.847	203.198	236.14	155.847	138.703	147.924	165.167	166.251	153.184	198.111	230.405	184.941	266.996	158.438	174.723	108.214	194.23	190.539
KIF26A	4.18511	16.3589	6.0524	16.4659	4.76973	56.6097	30.5686	9.54227	8.77485	14.778	18.2987	121.493	12.2129	20.1714	15.6862	23.0033	6.29525	22.4883	20.6495	24.896	96.1596	2.70065	5.29462	29.0057	13.3597	10.0948
ATG2B	1707.53	1695.6	1588.32	1968.5	1496.5	1936.86	1979.77	1949.22	2523.26	2085.55	2067.75	2034.38	2108.46	2255.35	1729.18	1815.17	1772.11	1786.21	1665	2080.59	1751.33	1864.35	1531.47	1277.37	1821.03	1678.25
ARFGEF1	2875.17	2774.48	3296.83	2939.98	2663.89	2904.28	3147.67	3528.04	3761.48	2988.85	3082.89	3689.21	3528.64	3467.56	3214.76	2839.87	3739.38	3541.37	2998.53	3759.29	3057.67	3267.79	2611.57	2760.01	3138.5	2821.49
ACSM2B	0	0	0	0	0	0	0	0	0	0	0	0	0	0	0	0	0	0	0	0	0	0	0	0	0	0
ZFAT	395.911	411.427	413.293	343.314	289.761	340.669	243.65	293.208	279.82	256.768	250.082	268.961	283.513	332.348	350.634	246.763	249.712	335.182	276.051	334.317	335.536	290.77	238.258	283.364	236.364	328.08
MTFR1	308.861	289.553	238.638	449.519	276.644	317.418	345.245	327.907	543.066	359.291	335.476	275.664	422.216	365.006	291.58	398.376	276.991	276.285	238.013	339.652	236.307	338.482	295.175	209.734	260	281.392
STAG3	170.753	127.6	128.83	140.783	164.556	149.611	230.164	233.352	278.845	230.907	257.924	220.364	177.086	202.675	233.448	261.401	128.003	173.481	180.411	219.618	172.883	243.059	199.872	114.907	103.795	158.993
FECH	717.328	569.291	619.939	556.547	698.765	578.227	1412.45	595.958	494.316	537.551	543.732	687.903	635.068	717.525	683.736	1194.08	949.534	560.065	673.826	593.946	946.252	629.253	497.694	669.363	635.1	519.88
MYO9A	1021.17	813.857	932.935	1100.74	1091.08	987.637	1128.34	1220.54	1448.82	1221.96	1262.61	1140.36	1264.9	1144.97	1078.66	1138.66	944.288	1114.78	996.61	1397.73	1037.3	1230.6	1134.37	706.178	1190.04	1063.74
DDX3Y	0	0	0.864629	0	20.2713	6.06532	0	0	0	0	0	0	0	0	0	1.04561	0	0	0	0	0	0	0	0	0	0
PFKP	1530.08	1374.15	2494.46	1346.91	1275.9	1686.16	1863.79	1670.76	1480.02	1136.06	1870.82	1643.93	1628.67	1650.21	2445.21	1756.62	2229.57	1241.14	1501.98	2165.95	1390.22	1605.09	1914.01	1836.29	1994.71	1784.25
IDI1	1690.78	1458.4	1256.31	1167.43	4485.93	1513.3	2868.05	1981.32	1585.32	2088.32	2159.24	1498.98	1858.1	1757.79	1692.27	2301.38	2554.82	1654.49	2640.96	1796.07	2225.99	2007.49	3760.51	2239.02	2371.86	3207.61
SP100	5091.61	4449.63	5011.39	4738.88	6256.69	5878.31	7605.29	8496.09	8687.1	4751.13	6645.04	10461	6950.86	7613.26	7949.23	10008.5	10647.4	5346.86	8359.79	8369.49	6491.8	9056.19	10783.8	8329.11	8009.66	8019.03
KLF6	13770.7	16503.7	16373.5	17918.2	18333.6	21211.4	22545.2	28794.2	19231.5	22736.9	25575.5	27898.2	21394.3	20876.4	24716.9	35137.6	30714.5	25587.4	23207.9	22372.6	31665.2	30776.7	30878.2	33464.8	17973.9	20015.4
PPAP2A	92.0724	102.243	62.2533	50.221	76.3157	121.306	150.146	86.7479	81.8986	128.384	97.593	86.3021	111.66	113.344	101.499	162.069	36.7223	106.016	98.9003	92.4707	77.7461	117.929	150.897	58.0115	72.9646	95.9003
NEO1	515.606	413.063	505.808	412.471	431.66	359.876	543.042	329.642	316.87	491.369	353.775	231.256	243.385	225.728	291.58	279.177	110.167	447.624	321.698	507.7	488.982	156.638	264.731	163.994	399.764	224.608
TRAM1	4884.86	4196.89	4611.93	3983.92	5901.35	4584.37	5579.67	4976.72	4365.97	4289.32	4775.09	4625.12	4927.01	6425.07	5034.36	4926.89	5177.85	4771.8	5994.88	4820.92	6005.88	5125.84	5429.63	6053.28	6134.16	6130.05
PHKA1	10.8813	6.54358	4.32315	6.58636	10.7319	4.04355	9.88984	3.46991	6.82488	12.0071	18.2987	7.54096	10.4682	40.3428	11.0726	13.5929	7.34446	1.07087	14.1286	13.3371	9.20677	11.7028	11.9129	8.92485	20.5534	6.30923
TNFRSF1A	1527.57	1893.55	2975.19	2254.18	2232.23	2896.19	1367.5	2798.49	2295.11	1957.16	1449.08	3273.62	1892.99	1821.19	2053.98	1261	4174.8	2876.36	2170.37	2197.96	2166.66	1775.23	794.193	2213.36	1322.61	1620.21
CACNB1	292.121	350.899	378.708	293.093	405.427	421.54	382.107	340.919	334.419	312.186	252.696	379.562	269.555	390.941	302.652	276.04	407.093	327.686	288.006	383.22	348.834	362.788	120.453	220.89	216.838	232.18
EVI5	405.956	365.622	491.974	494.8	680.879	644.946	472.914	713.067	948.659	500.605	754.603	735.663	781.623	514.851	647.75	342.959	1345.09	792.444	842.282	919.372	1137.55	754.383	260.76	692.791	601.187	675.087
STOML1	220.974	233.115	171.197	182.771	155.016	247.667	170.825	169.158	157.947	211.51	155.975	221.202	163.129	170.977	247.289	173.571	206.694	183.119	172.804	174.272	127.872	194.447	154.868	219.774	126.403	129.97
PKM	13048.3	15748.8	19633.1	16758.2	20242.7	16726.1	14719.7	15663.2	14444.4	13418.4	14296.5	18088.3	15459.7	14077.7	15035.7	11693	18349.6	20423.6	16814.1	14164	18649.9	14399	9718.28	24949.4	21172.1	21715.1
DHX29	981.827	842.486	928.612	890.805	1101.81	1095.8	1049.22	1066.13	1033.48	926.397	921.905	1154.61	1036.35	1228.53	1165.4	1059.2	1183.51	1088	1069.43	1041.18	1130.39	1152.28	953.032	1136.8	1062.61	1145.76
DNTTIP2	2104.27	1751.22	1722.34	1691.05	4000.61	1950	2620.81	1794.81	1553.15	2864.17	2340.49	1762.07	2376.27	1982.56	2131.48	2496.91	2249.5	2460.86	2480.11	1886.76	2742.6	2662.85	3434.89	3186.17	3061.43	3260.61
METTL22	312.209	322.271	376.114	343.314	382.771	410.42	300.292	401.643	439.717	374.992	379.044	380.4	384.705	353.48	291.58	292.77	415.487	368.379	338	338.763	404.075	355.586	270.026	327.988	302.135	324.294
TP53BP1	1181.04	1112.41	1076.46	1146.85	807.277	964.386	1107.66	1026.23	1104.66	1097.27	1314.02	1213.26	1055.54	1214.13	1259.51	1201.4	934.845	1021.61	1015.09	1254.58	936.022	1220.7	1203.2	790.964	1042.06	923.671
TRO	69.4728	55.6204	35.4498	57.6306	52.467	41.4464	35.064	23.4219	27.2995	46.1813	43.5683	25.1365	16.5746	36.5006	65.5131	52.2803	73.4446	16.0631	30.4309	42.6788	36.8271	56.7137	58.2408	35.6994	20.5534	21.4514
RRP15	569.175	500.584	415.022	490.683	496.052	425.583	495.391	426.799	528.441	567.107	501.035	415.591	557.429	467.784	462.283	559.399	359.879	462.616	437.987	465.021	371.34	437.506	683.006	439.549	530.278	411.362
RHOA	16296.8	16747.5	18590.4	16452.7	21405.4	15767.8	14033.7	18120.8	14330.3	14899	14349.7	18459.4	17191.3	14494.6	14688.8	13285.5	22810.8	17424.1	21087.5	16481.1	22893.2	16591	14733.6	26105.2	22843	21572.5
DHX8	1936.87	1878.82	2132.18	2018.72	2876.15	1740.75	2039.11	1935.34	1822.24	2133.58	1918.75	1974.06	2081.42	2045	1977.39	2122.58	2351.28	2033.58	2520.33	2076.14	2288.39	2200.13	2513.62	1915.5	2107.75	2487.1
PMS2P4	43.5252	49.8948	29.3974	36.225	39.3503	32.3484	22.4769	28.6268	21.4496	44.3341	37.4687	35.1912	41.8726	28.8163	40.5997	49.1435	30.4271	32.1261	33.6913	30.2308	43.9879	36.0087	56.9172	17.8497	27.7471	32.808
PRKCZ	292.121	274.83	282.734	246.165	369.654	300.233	325.466	270.653	263.245	308.491	418.256	243.824	269.555	322.742	397.692	323.092	202.497	321.261	269.53	327.204	244.491	308.775	295.175	193	219.921	237.227
ZFY	0.837022	0	0	0	1.19243	0	0	0	0	0	0	0.837885	0	0	0	1.04561	0	0	0	0	0	0	1.32366	0	3.08301	0
IARS2	2783.1	2722.95	2746.06	2674.88	2315.7	2480.72	2417.62	2411.59	2177.14	2285.98	2411.07	2420.65	2458.27	2569.45	2558.7	2099.58	2462.49	2633.27	2385.56	2397.12	2343.64	2211.84	2243.6	2862.64	2791.15	2572.9
SYT1	38.503	15.541	19.0218	4.93977	28.6184	10.1089	17.0825	7.80731	3.89993	7.38901	22.6555	12.5683	21.8087	29.7768	14.7635	13.5929	5.24604	17.1339	58.6881	56.0159	5.11487	17.1041	11.9129	11.1561	61.6602	22.7132
NAV3	5.02213	4.90768	7.78166	3.29318	2.38486	1.01089	36.8621	0.867479	0	8.31264	0.871366	1.67577	6.97877	6.7238	0.92272	5.22803	10.4921	6.42522	1.08682	5.33485	3.06892	4.50109	5.29462	12.2717	4.11068	8.83292
IDH3G	1520.87	1689.06	1669.6	1588.96	2269.2	1845.88	1571.59	1809.56	1641.87	1786.29	1333.19	1610.41	1878.16	1731.86	1774.39	1510.9	1974.61	1936.13	1958.44	1473.31	2162.57	1723.02	1273.36	1938.92	1483.96	1732.51
ROGDI	686.358	756.601	964.061	826.588	1200.78	1669.99	710.27	961.166	842.385	917.161	775.516	561.383	1307.65	441.85	817.53	542.669	1251.71	1114.78	1302.01	689.084	1649.04	993.841	264.731	1317.53	599.132	1010.74
PDZD4	1985.42	1692.33	2713.21	1134.5	2550.61	1707.39	2057.99	1819.97	1216.78	1541.53	937.59	1089.25	495.493	2379.26	738.176	745.517	1730.15	1212.23	2251.88	1740.05	1625.51	947.03	475.192	340.26	1005.06	1335.03
ATP2B3	1.67404	1.63589	0.864629	0	0	1.01089	2.69723	0	0	1.84725	0.871366	0	0.872347	0	0.92272	0	0	0	0	1.77828	0	4.50109	0	2.23121	3.08301	0
ROCK1	3696.29	3575.25	4322.28	3927.94	5878.69	4378.15	4844.22	5602.18	5949.35	4788.08	4865.71	5311.35	5327.42	5035.17	4804.6	4649.81	7338.17	4922.79	4852.63	4954.3	4984.96	4862.98	4227.76	4300.66	4667.68	5572.31
CBFB	2785.61	2423.58	2655.28	2474.82	3294.69	3374.34	3977.51	3311.17	2856.7	2796.74	3479.36	3581.12	3160.51	3514.63	3465.74	3552.97	3455.04	3182.63	3303.92	3709.5	3317.51	3398.32	3741.97	3323.39	3685.22	2985.53
PDK3	460.362	372.984	382.166	405.061	608.14	527.683	561.923	541.307	598.64	640.997	643.068	533.733	707.473	606.103	598.845	451.702	744.938	553.64	586.881	533.485	716.082	562.636	401.068	496.445	430.594	454.264
HYAL2	107.976	134.143	183.301	163.836	133.552	143.546	56.6418	120.58	130.648	76.661	63.6097	189.362	95.0858	77.804	118.108	64.8276	205.645	141.355	168.456	131.593	183.112	99.9242	55.5935	178.497	109.961	88.3292
HDAC4	1211.17	1258	1218.26	1349.38	2241.77	1567.89	1617.44	1968.31	2066.96	1670.84	1579.79	2030.19	2307.36	1599.3	1875.89	1807.85	2398.49	1605.23	1540.02	1671.59	1912.96	2043.5	1283.95	1672.29	1802.53	1703.49
RASSF1	2932.93	3248.89	3386.75	2677.35	4310.64	3822.16	3753.64	3412.66	2899.6	2982.39	2604.51	3966.55	2206.16	3886.36	3472.2	2211.46	4786.49	2805.68	4041.87	3758.4	3434.13	2766.37	1827.97	2342.77	1942.3	2092.14
FGFR3	5.02213	4.90768	0	3.29318	0	1.01089	8.09169	3.46991	4.87492	4.61813	6.09956	8.37885	0.872347	0.960543	5.53632	6.27363	2.09842	0	5.43408	43.5679	10.2297	9.00218	7.94193	2.23121	10.2767	3.78554
IFI35	993.545	783.593	1044.47	1034.88	1057.69	987.637	1505.95	1576.21	1243.1	671.476	685.765	2440.76	1716.78	1490.76	1150.63	1594.55	3142.38	809.578	2146.46	1680.48	1718.6	2167.73	1518.23	2868.22	2106.72	2118.64
HEATR6	883.895	525.122	607.834	528.555	628.412	570.14	754.325	589.018	578.165	643.768	696.221	754.934	529.514	467.784	896.884	607.497	606.443	485.104	869.453	984.279	665.957	726.476	657.857	591.271	867.353	521.142
COASY	1616.29	1797.03	1911.69	1684.46	1566.86	1852.96	1305.46	1620.45	1459.55	1405.76	1371.53	1546.74	1391.39	1737.62	1705.19	1241.13	1911.66	1597.74	1650.87	1458.19	1464.9	1452.05	1003.33	1721.38	1300	1443.55
PLEKHH3	35.1549	33.5358	23.345	19.7591	57.2367	63.6859	44.0547	37.3016	28.2745	40.6396	28.7551	67.0308	46.2344	75.8829	56.2859	29.277	41.9684	46.0474	64.1221	34.6765	77.7461	63.9155	14.5602	40.1618	36.9961	35.3317
MEF2A	1795.41	1898.46	1876.25	1951.21	2964.39	2635.38	2306.13	3842.93	3630.84	2118.8	2442.44	3336.46	2640.59	2279.37	2573.47	2782.36	3853.74	2615.07	3099.6	3063.09	3065.86	2932.91	2694.96	2791.25	2441.74	2734.42
OTUD5	2951.34	3113.92	2848.09	2669.94	3114.63	3198.45	3130.58	3066.54	2689	3207.75	3061.98	2870.59	2826.4	3136.17	3326.41	3320.84	2881.13	2994.15	3330	3075.54	2807.04	2984.22	3044.41	2611.63	2584.59	2517.38
TFE3	1598.71	1846.11	2143.42	1854.06	3082.44	2741.53	2426.61	2423.74	2029.91	2388.5	2189.74	3204.07	2672.87	1909.56	2443.36	2302.42	3000.74	3123.73	2682.26	2462.92	3373.77	2679.95	1805.47	2985.36	2118.03	1968.48
TBC1D25	778.431	874.385	872.411	772.25	1252.05	942.147	1069.9	932.54	794.611	906.077	978.544	919.997	708.345	941.332	1007.61	1093.7	974.715	894.177	1159.63	927.374	947.275	1008.24	1077.46	779.808	795.417	855.531
ACSL4	1925.15	1742.23	2558.44	2228.66	2220.31	2046.04	1820.63	2677.91	2802.1	1700.4	1894.35	3337.29	2568.19	2579.06	2241.29	1798.44	4513.7	2630.06	2524.67	2664.76	2710.88	2257.75	1598.98	3147.12	2988.46	3304.77
INPP5A	390.889	364.804	375.249	382.009	850.204	628.772	376.713	689.646	603.515	758.297	686.636	412.239	771.154	438.008	646.827	629.455	709.265	554.711	597.749	509.478	785.645	602.246	528.139	543.3	411.068	410.1
GPKOW	570.012	575.017	695.162	549.961	462.664	538.803	465.722	470.173	374.394	359.291	471.409	690.417	481.535	584.01	638.522	474.705	616.935	435.844	510.804	583.277	471.591	482.517	456.661	605.774	545.693	417.671
GRIPAP1	2245.73	2616.61	2709.75	2751.45	2158.3	2465.55	2565.06	2467.98	2633.43	2235.18	2129.62	2563.93	2637.98	2393.67	2448.9	2626.56	2847.55	2300.23	2433.38	2381.12	2617.79	2486.4	2342.87	2596.01	2418.11	2478.26
FTSJ1	1025.35	1085.42	1060.04	1052.17	1277.09	1172.63	1245.22	1029.7	920.384	1001.21	1009.04	1136.17	975.283	1369.73	1219.84	1170.03	1014.58	1024.82	1123.77	1066.97	1017.86	1127.97	1065.54	1018.55	1118.1	1081.4
PRR11	204.233	141.505	148.716	177.008	184.827	190.047	179.815	185.64	112.123	147.78	204.771	227.067	298.343	423.599	268.512	167.297	197.251	174.552	319.524	293.417	308.938	227.755	78.0957	230.93	273.36	177.92
REEP1	9.20724	4.90768	8.64629	30.4619	2.38486	4.04355	6.29353	30.3618	12.6748	11.0835	47.9251	43.57	2.61704	2.88163	4.6136	3.13682	6.29525	6.42522	6.5209	28.4525	116.619	53.1129	1.32366	4.46242	1.02767	2.52369
ATP11A	3030.86	2534.82	3472.35	3332.7	4223.6	4307.39	3900.19	4743.37	4840.79	3426.65	3804.38	4310.08	5167.78	3543.44	4188.23	2642.25	6457.88	4303.83	3800.6	4479.49	6152.17	3968.16	1413.66	4058.57	3717.08	3449.89
POLR1A	1040.42	1007.71	1095.49	1146.03	1204.36	979.549	1102.27	1156.35	1303.55	1003.98	1016.01	1178.07	1293.69	1413.92	1264.13	1090.57	1253.8	1056.95	859.672	1118.54	852.138	1011.85	884.202	789.849	1000.95	986.763
LAPTM4A	2354.54	2417.03	3142.93	2618.08	6104.06	3319.75	3009.21	3170.63	2776.75	2976.85	2404.1	2976.17	3366.39	2177.55	2657.43	2213.55	3895.71	3724.49	4125.55	2926.16	5188.53	3291.2	2720.11	4845.08	4116.85	5043.6
TTC7A	2969.75	3437.01	4227.17	3782.21	5216.89	4164.85	3282.53	5436.49	4751.09	3361.08	3139.53	3773.83	4128.82	3147.7	4297.11	3159.82	6026.66	4845.69	4610.27	3547.67	5231.49	4499.29	2955.72	4692.24	3272.1	4542.64
IP6K2	1498.27	1181.93	1695.54	1412.77	1682.52	1147.36	1216.45	1333.31	1229.45	1326.33	1201.61	1271.91	1194.24	1465.79	1342.56	1400.07	1498.27	1370.71	1413.95	1427.96	1376.92	1565.48	1642.66	1170.27	1236.29	1607.59
STON1-GTF2A1L	0	0	0	0	0	0	0	0.867479	0	0	0	0.837885	0	0	0	0	0	0	0	0	1.02297	0	0	0	0	0
SRBD1	702.262	494.04	556.821	542.551	417.351	570.14	545.739	697.453	625.939	505.224	556.803	797.666	751.09	770.355	672.663	685.917	1077.54	592.191	782.508	811.786	635.267	687.767	720.069	753.034	628.934	673.825
CYFIP1	1129.98	1515.66	1914.29	1834.3	1835.15	1606.3	1055.52	2376.02	2018.22	1100.96	867.009	1968.19	1815.35	1078.69	1444.06	842.758	2369.11	2279.88	1897.58	1512.43	2229.06	1807.64	366.653	2360.62	1924.83	1986.14
KIF2A	3307.91	2657.51	2882.67	2991.85	2238.2	3004.36	3864.23	3427.41	2953.22	3321.36	4636.54	3614.63	3585.34	3505.98	3858.82	3848.87	2748.93	3790.88	3457.16	3896.22	3327.74	3599.97	3731.38	2891.65	3843.49	2777.32
RASGRP2	16568	16826.8	14213.6	14150	13748.7	16172.2	16617.6	15152.2	15184.4	21034.7	16257.9	11572.9	14382.4	12897.2	15906.8	18747.7	12085.8	17287.1	14138.4	13957.7	11705.9	14856.3	13731.6	11880.1	10131.8	8918.72
PSME4	2208.06	1771.67	2079.43	2285.47	2903.57	2083.44	3007.41	2411.59	2941.52	2485.48	2759.62	2561.41	2750.51	3158.26	2733.1	3161.91	2187.6	2228.48	2457.29	2544.72	2567.67	2810.48	2974.25	1696.84	2239.29	2603.19
IFT80	498.865	426.15	401.188	465.985	344.613	516.563	494.492	382.558	422.168	480.286	501.907	418.104	420.471	443.771	536.1	506.073	294.828	445.482	359.736	368.994	323.26	478.016	577.114	369.265	511.78	392.434
SIRT2	1741.01	1696.42	2084.62	1674.58	2494.57	2080.41	2104.74	2120.99	1712.07	1997.8	1656.47	2174.31	1876.42	1838.48	1958.01	1773.35	2655.55	2008.95	2442.08	2012.13	2514.47	2020.09	1204.53	1925.54	1511.7	1983.62
ERLEC1	1086.45	1010.98	1180.22	1100.74	1125.66	963.375	1218.25	1014.08	890.16	873.751	1339.29	1200.69	939.517	2634.77	1555.71	1313.28	1356.63	920.949	1401.99	1251.02	1008.65	1288.21	1434.84	1208.2	1899.13	1480.14
PPP2R5B	636.974	611.007	855.983	677.571	889.554	917.885	873.003	1007.14	738.062	702.88	802.528	969.433	657.749	728.091	852.593	777.931	1238.07	849.2	978.134	879.361	1077.19	835.402	561.23	888.022	627.906	613.257
PYGM	249.433	248.656	182.437	219.82	222.985	216.33	212.182	197.785	220.346	302.949	276.223	145.792	204.129	146.963	207.612	324.138	115.413	231.308	148.894	194.722	179.021	288.97	266.055	182.959	114.071	142.589
PAGE1	0	0	0	0	0	0	0	0	0	0	0	0	0	0	0	0	0	0	0	0	0	0	0	0	0	0
PITX1	1.67404	0	0.864629	0	5.96216	0	8.09169	0	0.974983	3.69451	1.74273	9.21673	1.74469	8.64489	2.76816	3.13682	1.04921	0	3.26045	0	1.02297	1.80044	0	0	1.02767	0
TRPC7	0	0	0	0	0	0	0	0	0	0	0	0	0	0	0	0	0	0	0	0	0	0	0	0	0	0
MAST4	506.398	498.948	485.922	720.383	488.897	558.01	772.307	590.753	645.439	1421.46	971.573	500.217	820.006	550.391	676.354	850.077	202.497	640.381	608.617	635.736	604.578	638.255	731.981	362.572	1065.69	489.596
GPR116	0.837022	0	0	0	0	0	0	0.867479	0	0	1.74273	0	0	0	0	0	1.04921	0	2.17363	0	0	0	0	0	2.05534	0
SDK2	393.4	165.225	262.847	500.563	434.045	253.733	537.648	242.027	291.52	619.753	714.52	50.2731	409.131	292.966	277.739	582.402	39.8699	576.128	315.177	267.632	237.33	474.415	480.487	140.566	219.921	113.566
ADAM7	0	0	0	0	0	0	1.79815	0	0	0	0	0	0.872347	0	0	0	0	0	0	0	0	0	0	0	1.02767	0
NUP133	1220.38	1106.68	1189.73	1239.06	1107.77	1147.36	1081.59	1152.01	1174.85	1126.82	1129.29	1127.79	1120.97	1308.26	1242.9	1284	1146.79	1078.37	1093.34	1201.23	1083.33	1142.38	1233.65	1026.36	1200.32	1124.3
NUCKS1	3082.75	2830.92	2774.59	2664.18	3076.48	2621.23	3058.66	2661.42	2712.4	2494.71	3895.88	2956.89	3053.21	3864.26	3347.63	3105.45	2619.87	2676.11	3246.32	3123.55	2427.52	3030.13	3734.03	2554.74	3362.54	3003.19
VPS35	2691.86	2607.62	3193.08	2903.76	1811.3	2844.64	2347.49	2915.6	2898.62	2014.43	2419.78	3099.34	2721.72	2536.79	2905.65	2176.95	3282.97	2867.79	3084.38	3465.87	3211.12	2461.2	1621.48	2742.16	2782.93	2304.13
DNAJA2	1409.55	1410.14	1510.51	1439.12	1947.24	1928.77	1670.48	1887.63	1637	1590.48	1673.02	1813.18	1687.12	1728.98	1868.51	1644.74	2069.04	1876.17	1936.71	1847.64	1735.99	1881.46	1866.35	1676.76	1587.75	1757.75
BCL3	808.563	793.409	713.319	673.455	5196.62	2160.27	5231.73	1740.16	1573.62	4023.32	3137.79	1979.08	3193.66	1956.63	1817.76	3860.38	1956.77	3408.58	4069.04	2060.14	4873.45	4121.2	2342.87	2093.99	2194.08	2668.8
KCNAB2	7654.57	8293.17	8729.3	7047.4	11039.5	10493	9334.21	9997.69	8796.3	8177.79	8472.29	8370.47	8277.7	9094.42	12033.2	9196.1	12890.6	9145.23	10140	9554.71	10293.2	9047.19	4988.86	7766.85	6700.41	6832.89
ABCC9	266.173	232.297	216.157	257.691	454.317	279.005	372.218	350.461	509.916	443.341	422.612	325.937	472.812	350.598	297.116	374.327	310.566	388.726	355.389	401.003	442.948	430.304	420.922	324.641	413.123	435.337
GAL	0	0	0	0	0	0	0	0	0	1.84725	0	0	0	0	0	2.09121	0	0	0	0	0	0	0	0	0	0
CLEC2D	2691.86	2412.13	2353.52	2513.52	1663.44	2199.69	2994.82	2391.64	3147.25	2778.27	3077.66	2882.32	2359.7	3046.84	3088.34	3556.1	1204.49	2016.45	2364.91	3119.11	1378.97	2462.1	3863.75	1952.31	3087.12	2249.87
FUNDC1	171.59	204.487	191.083	182.771	132.36	133.437	141.155	124.049	111.148	115.453	174.273	163.388	120.384	154.647	189.158	163.114	153.184	164.914	157.588	147.597	129.918	148.536	283.262	172.919	203.479	175.397
MAOB	0.837022	4.08974	6.0524	3.29318	1.19243	10.1089	2.69723	11.2772	5.8499	1.84725	9.58503	0.837885	3.48939	0	4.6136	4.18242	10.4921	19.2757	8.69453	6.22399	6.13785	2.70065	6.61828	6.69363	5.13835	1.26185
RORA	4644.64	4324.49	3714.45	4146.11	6976.92	4488.34	8655.41	4739.04	6009.8	7665.18	6259.89	5582.83	5080.55	6674.81	4561.01	6374.01	2780.4	5163.74	5396.04	5504.67	5119.99	6068.37	5196.67	2974.2	7645.86	7101.67
DRD4	11.7183	8.99742	1.72926	4.93977	33.3881	36.3919	7.19261	14.7471	31.1995	27.7088	7.84229	10.8925	31.4045	9.60543	8.30448	12.5473	13.6397	8.56696	13.0418	24.0068	16.3676	9.00218	1.32366	4.46242	3.08301	1.26185
TGFBR3	2527.81	1864.1	2799.67	1505.81	3669.11	1656.84	3988.3	1961.37	1673.07	1953.47	1878.66	3097.66	1640.01	4451.16	1657.21	1569.45	2449.9	1906.15	4119.03	2972.4	2032.65	2115.51	1031.13	1006.28	2491.07	4030.33
KIAA1107	128.901	130.872	87.3275	118.554	121.628	135.459	154.641	129.254	154.047	217.052	156.846	171.766	146.554	124.871	136.563	170.434	97.5764	158.489	110.855	119.145	81.838	189.946	197.225	145.029	168.538	143.85
PLA2G10	11.7183	8.17947	11.2402	11.5261	10.7319	25.2722	17.0825	14.7471	13.6498	31.4033	22.6555	7.54096	20.9363	11.5265	10.1499	28.2314	11.5413	8.56696	6.5209	17.7828	8.1838	21.6052	21.1785	10.0405	10.2767	8.83292
HES2	3.34809	0.817947	3.45852	4.93977	1.19243	1.01089	0.899076	0.867479	1.94997	0	1.74273	0.837885	0.872347	0	0	0	1.04921	0	1.08682	0	1.02297	0.900218	2.64731	4.46242	4.11068	5.04738
ATP1B3	1557.7	1365.97	1700.73	1623.54	2452.83	1634.6	1887.16	2005.61	1859.29	1443.63	1373.27	2185.2	2807.21	2105.51	1917.41	1402.16	3096.22	1446.75	2937.66	1922.32	2947.19	1593.39	1163.49	2375.12	2337.95	2594.35
NEDD4	466.221	387.707	376.114	478.334	606.948	547.901	835.242	673.163	955.483	1049.24	929.747	710.526	710.09	797.251	407.842	551.034	659.952	662.869	722.733	923.818	837.816	760.684	434.159	512.063	464.507	521.142
PIGB	244.41	263.379	267.17	335.904	300.493	370.996	446.841	434.607	516.741	499.682	419.998	532.057	450.131	458.179	422.606	519.666	452.209	432.632	440.161	510.367	453.178	382.593	395.773	370.381	428.538	335.651
MAPK6	1011.12	871.932	921.695	972.311	2777.17	1116.02	1487.07	1077.41	920.384	1903.59	1202.49	1026.41	1832.8	1414.88	1166.32	1496.26	1201.34	1443.53	1813.9	1110.54	1950.81	1524.97	2129.76	1840.75	1906.33	2130
GNB5	608.515	612.642	597.459	552.431	465.049	657.077	675.206	630.657	623.014	604.975	812.113	508.596	494.62	577.286	639.445	746.562	254.958	721.767	567.318	561.048	491.028	474.415	774.338	455.167	490.199	556.474
RAB27A	2802.35	2931.52	4597.23	3151.57	4241.48	3166.1	3612.49	4123.99	3809.26	2771.8	3676.29	3658.2	3207.62	3870.99	3508.18	2451.95	4996.33	4316.68	3563.67	3687.27	4190.1	2947.31	1902.09	3988.29	3809.57	4267.56
CECR5	961.738	983.99	1028.04	1020.89	1023.11	1085.69	807.371	1083.48	1000.33	822.027	745.889	858.832	934.283	762.671	931.947	708.921	935.894	1139.41	715.125	810.008	1017.86	1011.85	730.658	915.912	749.171	784.868
UFD1L	1718.41	1511.57	1443.93	1384.78	2012.83	1534.53	2097.55	1660.35	1672.1	2046.76	1855.14	1652.31	1986.33	1941.26	1614.76	2114.21	1613.68	1668.42	1853.02	1517.76	1901.71	1841.85	2050.34	1734.77	1732.65	2010.12
LRP6	95.4205	134.961	66.5764	172.069	59.6216	138.492	109.687	73.7357	95.5483	359.291	53.1533	21.785	215.47	78.7645	82.1221	117.108	33.5747	123.15	71.7299	87.1358	37.8501	110.727	121.776	51.3179	105.85	112.304
GUCY2C	20.9256	26.9923	36.3144	35.4017	88.24	42.4573	17.9815	81.543	85.7985	20.3198	54.0247	14.244	45.362	23.053	26.7589	10.4561	81.8383	64.2522	35.8649	17.7828	36.8271	41.41	15.8839	55.7803	24.6641	34.0698
SCT	15.0664	22.0846	13.8341	13.996	36.9654	33.3593	14.3852	33.8317	33.1494	21.2434	13.0705	10.8925	20.9363	11.5265	1.84544	13.5929	12.5905	17.1339	21.7363	8.00227	11.2527	15.3037	0	18.9653	3.08301	5.04738
PHRF1	1609.59	1706.24	2133.04	1634.24	2239.39	1925.74	1962.68	1745.37	1734.49	1650.52	1903.93	2090.52	1665.31	2078.61	2154.55	1871.63	2160.32	1738.02	1931.27	2193.51	1653.13	1812.14	1409.69	1330.92	1419.21	1636.61
IKBKAP	1772.81	1849.38	1897.86	1863.12	1475.04	1783.2	1630.92	1570.14	1681.85	1810.31	1642.52	1663.2	1576.33	1856.73	1829.75	1527.63	1337.74	1482.08	1368.3	1723.16	1463.88	1491.66	1418.96	1469.25	1591.86	1366.58
NUCB2	2311.86	1706.24	1778.54	1675.4	1414.22	1519.36	2149.69	1495.53	1348.4	2058.76	2435.47	1442.84	1697.59	2078.61	1934.02	2094.35	1891.72	1555.97	1661.74	1382.61	1175.4	1981.38	2295.22	2001.4	1636.05	1834.72
PFN2	61.1026	170.133	82.1398	115.261	90.6249	150.622	115.082	77.2056	69.2238	229.059	91.4934	46.9215	103.809	43.2244	60.8995	94.1045	34.6239	103.874	81.5112	56.905	56.2636	68.4166	80.743	53.5491	90.435	61.8304
PTPN3	2.51107	9.81537	10.3755	2.46988	0	2.02177	3.59631	8.67479	1.94997	20.3198	74.0661	6.70308	6.10643	42.2639	29.527	14.6385	14.6889	2.14174	27.1704	18.672	6.13785	11.7028	9.26559	11.1561	14.3874	5.04738
SPTB	168.241	165.225	473.817	302.149	348.19	289.114	459.428	447.619	301.27	438.723	277.966	274.826	145.682	391.901	276.816	437.063	538.244	290.206	360.823	341.43	435.787	267.365	100.598	121.601	191.147	180.444
DAPP1	1234.61	1725.05	2133.04	2096.93	1638.4	2527.22	1374.69	2668.36	2564.21	1359.58	2626.3	2899.92	2019.48	1839.44	2828.14	2067.16	2770.96	1959.69	2571.41	2893.27	2656.67	2188.43	2199.92	2012.55	2161.19	1491.5
FGF10	0	0	0	0	0	0	0	0	0	0	0	0	0	0	0	0	0	0	0	0	0	0	0	0	0	0
SLC44A1	1170.16	1046.97	1424.04	1349.38	1433.3	1344.48	1606.65	1529.36	1574.6	1189.63	1426.43	1462.95	1567.61	2739.47	2050.28	1743.02	2171.86	1790.5	1710.65	1748.94	2141.09	1526.77	1219.09	1783.85	1863.17	2002.55
TMEM260	531.509	484.225	510.131	573.013	496.052	564.075	613.17	605.5	636.664	486.751	639.583	602.439	528.642	579.207	515.801	569.855	599.098	520.443	530.366	593.946	519.671	528.428	680.359	601.311	570.357	572.878
SMG6	1350.95	1256.37	1283.11	1202.83	1274.71	1375.82	1460.1	1213.6	1174.85	1541.53	1293.98	1095.95	1392.27	1314.02	1408.99	1321.65	1004.09	1324.67	1212.89	1197.67	1173.35	1319.72	1261.44	1058.71	1180.79	1220.2
EXOC5	1479.86	1159.85	1417.13	1369.14	1440.46	1259.57	1471.79	1661.22	1563.87	1200.71	1585.01	1780.5	1478.63	1716.49	1695.04	1526.58	1976.71	1392.13	1510.67	1826.3	1453.65	1523.17	1592.36	1491.56	1634	1292.13
CLTCL1	74.495	130.054	278.411	169.599	157.401	225.428	97.9993	250.701	272.02	120.071	115.892	181.821	136.958	141.2	165.167	62.7363	456.406	264.505	92.3794	146.708	179.021	126.931	37.0624	215.312	86.3243	128.708
FGF22	4.18511	5.72563	1.72926	4.93977	4.76973	10.1089	13.4861	13.0122	7.79987	11.0835	6.09956	14.244	8.72347	6.7238	8.30448	4.18242	1.04921	17.1339	8.69453	10.6697	8.1838	0.900218	2.64731	7.80924	7.19369	6.30923
FSTL3	98.7686	119.42	157.363	100.442	174.095	277.994	92.6049	258.509	208.646	169.024	126.348	169.253	170.98	158.49	160.553	129.655	389.256	304.127	171.717	143.152	213.802	225.055	34.415	127.179	119.21	117.352
DGCR2	1974.54	2144.66	3071.16	2498.7	2485.03	2675.82	1911.44	2571.21	2478.41	2469.78	2278.62	2227.1	2156.44	2287.05	2546.71	2190.54	2922.05	2571.16	2329.05	2115.27	2017.31	2352.27	1888.86	2230.1	1713.13	2261.23
RNF126	1639.73	1898.46	1437.01	1281.87	4159.2	3506.77	3845.35	2792.41	2865.48	3458.98	3480.24	3276.97	3376.85	3602.04	3391.92	3539.38	2959.82	3393.59	4161.42	2979.51	3097.57	3638.68	1407.05	1489.33	1706.96	1549.55
MNT	740.765	778.686	792.865	706.387	2148.76	1188.8	1311.75	1255.24	1216.78	1743.81	1206.84	1013.84	1882.52	1045.07	1130.33	1196.17	1383.91	1528.13	1943.23	1188.78	2215.76	1544.77	726.687	889.138	1072.89	1009.48
ZXDC	1407.03	1443.68	1442.2	1571.67	2696.09	2350.31	1956.39	2364.75	2427.71	2430.98	1960.57	1890.27	2262.87	1850.01	1814.99	2115.26	2178.16	2400.89	2355.13	2069.03	2563.57	2357.67	1677.07	1559.62	1394.55	1844.82
JMJD6	792.66	828.58	811.887	666.045	3126.56	1186.78	1554.5	1323.77	970.108	1899.9	1578.04	1098.47	1503.93	1341.88	1116.49	1681.33	1839.26	1566.68	1658.48	1207.45	2002.98	1834.64	1973.57	1793.89	1409.96	2164.06
POLB	385.867	372.984	322.507	411.647	484.128	500.389	348.842	386.028	383.168	446.112	342.447	438.214	462.344	454.337	424.451	479.933	482.636	342.679	421.685	328.982	422.489	451.91	554.612	438.433	333.993	359.626
ST6GALNAC1	58.5916	97.3357	47.5546	105.382	5.96216	109.176	139.357	27.7593	25.3496	147.78	66.2238	42.7321	126.49	138.318	154.094	69.01	19.935	79.2444	24.9968	89.8033	35.8041	37.8092	62.2118	58.0115	4.11068	61.8304
WIPI1	436.926	445.781	455.66	425.643	482.935	556.999	468.419	465.836	461.167	352.825	426.098	556.355	458.854	584.971	450.287	415.105	936.943	469.041	544.495	449.905	601.509	487.918	313.706	562.265	447.036	432.813
FRMPD1	8.37022	5.72563	4.32315	1.64659	1.19243	2.02177	0.899076	3.46991	0.974983	4.61813	4.35683	1.67577	4.36173	1.92109	0.92272	4.18242	2.09842	5.35435	2.17363	3.55657	2.04595	2.70065	5.29462	4.46242	7.19369	3.78554
GBA2	2033.13	2339.33	2479.76	2424.6	2092.72	2354.36	1809.84	2149.61	1913.89	1875.89	1857.75	2331.83	1719.4	2412.88	2134.25	1835.04	2815.03	2006.81	2282.31	2053.03	2249.52	1690.61	1685.01	2457.68	1620.64	1895.29
NDST1	838.696	1481.3	2062.14	1743.74	1807.73	2111.74	773.206	2282.34	2116.69	1173.01	1053.48	1676.61	1592.03	1385.1	1493.88	722.514	3325.99	2439.44	1757.38	1025.18	2379.44	1091.06	349.445	2056.06	1085.22	2089.62
ASNS	1055.48	1150.03	849.93	945.142	564.02	775.35	743.536	573.403	667.863	668.705	1043.9	799.342	758.069	872.173	1056.51	1000.64	407.093	761.389	691.215	766.44	650.612	991.14	1080.1	738.531	724.507	656.16
AP3M2	693.054	979.083	671.817	649.579	605.756	774.339	1752.3	512.68	642.514	1514.75	887.922	797.666	1202.09	637.8	633.909	1234.86	480.538	903.815	647.742	818.899	796.897	815.598	1245.56	649.283	1283.56	705.372
CNGB1	0	0.817947	0	1.64659	0	1.01089	0.899076	0	1.94997	0	0.871366	5.02731	0	0	2.76816	2.09121	0	1.07087	0	0	1.02297	0	2.64731	0	0	1.26185
ST6GALNAC2	67.7988	141.505	133.153	115.261	315.995	166.796	60.2381	216.002	164.772	181.954	148.132	180.983	109.916	152.726	45.2133	31.3682	239.22	221.67	149.981	193.833	253.698	168.341	43.6806	127.179	21.5811	98.4239
CHAT	0	0	0	0	0	0	0.899076	0	0	0	0	0	0	0	0	0	0	0	0	0	0	0	0	0	0	0
PABPC1	63909.2	60915	53539.6	56690.4	84378.9	83117.1	74033.5	71802.9	60634.2	85597.1	71007.6	48602.3	82276.2	57609.5	71965.7	71306.1	56747.5	94981.9	70493.1	61088.5	91893.8	69387.9	61575.1	63412.1	53842.7	55478.3
TESK2	308.861	319.817	277.546	272.51	565.213	376.05	410.878	368.678	354.894	470.126	380.787	335.992	437.046	337.151	360.784	479.933	380.863	427.277	446.681	308.532	507.395	433.005	501.665	455.167	361.74	450.479
C16orf80	460.362	395.068	346.716	361.426	372.039	329.549	245.448	251.569	260.32	287.248	298.007	251.365	254.725	253.583	317.416	351.324	290.631	296.631	285.833	256.073	254.721	354.686	367.976	317.948	276.443	307.89
CSNK2A2	1756.91	1748.77	1798.43	1658.12	2417.06	1989.43	1955.49	1953.56	1866.12	2092.94	1856.88	1856.75	2315.21	2050.76	2170.24	1996.06	2225.37	1951.13	2030.17	2061.03	2038.79	2130.82	1882.24	1853.02	1907.36	2273.85
PTPN21	0.837022	2.45384	0	2.46988	1.19243	4.04355	0.899076	4.33739	7.79987	0.923626	4.35683	8.37885	1.74469	0	0	6.27363	4.19684	6.42522	0	4.44571	0	0	2.64731	3.34682	1.02767	2.52369
EIF2B3	334.809	269.923	322.507	337.551	255.181	243.624	247.246	237.689	233.021	204.121	259.667	293.26	271.3	351.559	291.58	260.356	253.909	225.954	296.701	274.745	238.353	254.762	312.383	294.52	340.159	277.606
CAMK2A	0.837022	0	0	0.823294	0	0	0	0	0	0.923626	0	0	0	0	0	0	0	0	0	0	0	0	0	0	1.02767	0
TCOF1	2152.82	2119.3	2267.92	2002.25	2597.12	2467.58	2850.07	2316.17	2474.51	2742.25	2850.24	2356.13	3525.15	2814.39	2831.83	3297.84	2385.9	2371.98	2552.93	2705.66	2796.81	3026.53	2281.98	1830.71	2001.9	1723.68
CDC42	11099.8	10383	10562.3	10310.9	12872.3	10510.2	10569.5	10989.2	9639.66	11149.1	10831.1	11975.9	12027.9	10585.2	11167.7	9744	13625	12612.7	13025.5	10987.1	14437.2	11295.9	11620.4	14323.3	14251.7	12174.3
OSBPL3	1476.51	1931.99	1436.15	1435.83	1670.6	1394.01	1842.21	1845.13	1696.47	1648.67	1723.56	2141.63	1493.46	1950.86	1621.22	1389.61	1844.51	1506.71	1789.99	1702.71	1318.61	1268.41	1025.83	1282.95	1832.34	1242.92
EPHA8	0	0.817947	0	0	1.19243	0	0	0	0	1.84725	0	3.35154	0.872347	1.92109	0.92272	0	1.04921	2.14174	0	0.889141	0	0	2.64731	0	0	0
SLC12A3	138.109	102.243	44.9607	50.221	29.8108	61.6641	16.1834	66.7959	42.8993	36.0214	12.1991	29.326	39.2556	17.2898	23.068	14.6385	11.5413	42.8348	40.2122	24.896	24.5514	30.6074	9.26559	43.5086	20.5534	51.7357
RAD18	549.924	463.776	430.585	440.463	330.304	429.627	537.648	439.812	450.442	500.605	503.65	482.622	449.258	582.089	505.651	569.855	470.046	404.789	503.196	441.014	371.34	487.918	602.263	477.479	490.199	490.858
ATP2B1	2399.74	2633.79	2832.53	3007.49	4358.34	2687.95	4038.65	2963.31	3673.74	3849.67	3331.23	3134.53	3971.79	2600.19	2973.93	3515.33	2096.32	3402.16	4626.58	3513.89	5835.05	3547.76	3666.53	2647.33	4175.42	3877.65
TRPM5	10.0443	12.2692	4.32315	18.9358	10.7319	10.1089	8.99076	10.4097	9.74983	20.3198	9.58503	3.35154	15.7022	2.88163	5.53632	27.1857	3.14763	21.4174	11.955	5.33485	3.06892	10.8026	14.5602	7.80924	1.02767	3.78554
NCK2	2190.49	2372.86	1842.52	1915.81	3382.93	3243.94	4166.32	3597.43	3298.37	3298.27	4772.47	2307.53	2764.47	2588.66	3032.06	3643.94	2294.62	2718.94	2784.42	2751.89	3280.68	3075.15	2810.12	1809.51	2266.01	2229.68
MAP4K4	4858.08	4600.95	4541.03	4762.76	6758.71	5153.5	5637.21	5387.91	5158.64	5978.63	6160.56	4685.45	5871.76	4749.88	5704.26	6547.58	4915.54	6495.9	5331.92	4509.72	6005.88	5776.7	6544.15	5806.73	5809.42	6137.62
MGAT4A	5297.51	3826.36	2831.66	3596.97	4637.37	3492.61	5477.17	3262.59	3971.11	6880.09	4566.83	2374.57	5172.14	3858.5	3409.45	5475.84	2820.27	4342.38	3515.85	3181.35	3174.29	4629.82	6843.3	2946.31	5611.08	5408.27
RPL31	28583.5	29407.7	23160.8	25437.3	19595.2	17687.5	17193	12919.4	11987.4	20472.2	16837.4	11466.5	16473.4	12087.5	14517.2	16028.1	10026.2	19588.4	12996.1	11345.4	14114	13192.7	34123.8	25455.9	24226.3	23994
WDR1	11340.8	11106.9	11207.3	11119.4	11764.5	11130.9	10783.5	11508	9601.63	10876.6	12355.1	12569.1	11922.4	11582.2	10847.5	9265.11	12334.5	10513.8	12563.6	11863.8	15049	10776.5	7701.03	11253.1	11233.5	9858.8
SNX13	1047.95	828.58	1018.53	979.72	1267.56	972.473	1176.89	1139.87	1224.58	1089.88	1150.2	1141.2	1333.82	1154.57	1127.56	1285.05	1474.14	1182.24	1332.44	1198.56	1307.36	1107.27	1232.32	1136.8	1254.78	1401.91
MS4A12	0	0	0	0	0	0	0	0	0	0	0	0	0	0	0	0	0	0	0	0	0	0	0	0	0	0
ARHGAP10	304.676	302.64	274.087	232.169	321.957	247.667	277.815	294.075	255.446	198.58	208.256	597.412	251.236	341.953	202.076	142.202	204.596	298.773	274.964	327.204	254.721	259.263	125.747	317.948	326.799	248.584
RPS6KA2	365.779	358.261	235.179	383.655	324.342	372.006	367.722	332.244	363.669	509.842	304.978	521.164	364.641	282.4	331.257	530.122	174.169	375.876	361.91	490.806	434.764	338.482	451.367	276.67	279.526	215.776
ING3	848.74	736.97	704.673	770.604	1714.72	890.591	1013.26	870.949	744.887	1134.21	951.532	743.204	1019.77	804.935	1044.52	1142.85	943.239	1038.74	1081.38	767.329	1276.67	1033.45	1702.22	1063.17	1037.95	1110.42
VASH1	869.666	513.671	568.926	822.471	1258.02	465.008	704.876	434.607	365.619	769.381	789.458	297.449	494.62	556.154	473.355	485.161	813.137	750.68	490.154	1022.51	740.634	307.875	300.47	399.387	1012.25	319.247
LMCD1	6.69618	7.36152	7.78166	9.87953	5.96216	10.1089	5.39446	13.8797	3.89993	5.54176	10.4564	10.0546	13.0852	24.9741	25.8362	15.6841	4.19684	4.28348	5.43408	5.33485	17.3906	18.0044	9.26559	5.57803	10.2767	5.04738
WBSCR22	1347.61	1662.89	1290.03	1327.15	1674.17	1074.57	1523.93	1287.34	1159.25	1620.96	1420.33	1247.61	1601.63	1548.4	1278.89	1544.36	1248.56	1323.6	1480.24	1316.82	1409.66	1898.56	1896.8	1533.96	1632.97	1732.51
SEL1L	2586.4	2228.09	3033.98	2934.22	3138.48	2687.95	3188.12	3818.64	3947.71	2733.01	3155.22	3624.69	3488.51	5541.37	3701.95	2806.41	4753.97	3363.6	3499.55	3622.36	4013.13	3442.43	2168.15	3081.3	3483.8	3825.92
TRIP13	37.666	25.3564	24.2096	27.1687	22.6562	46.5008	67.4307	21.687	14.6247	34.1742	85.3939	103.06	59.3196	320.821	71.0495	79.466	44.0668	21.4174	56.5144	47.1245	15.3446	72.0175	26.4731	45.7398	88.3796	74.4489
ATP6AP1	2925.39	3410.02	3799.18	3339.28	5166.81	3827.22	2969.65	4241.97	3648.39	3285.34	2698.62	3785.56	3388.19	3330.2	3323.64	2868.1	5295.36	3624.9	4299.44	3516.55	4563.49	3819.63	2099.32	4973.37	3775.66	3992.48
TCF3	3442.67	3131.1	2686.4	2457.53	3904.02	3591.68	4562.81	3736.23	3791.71	3794.26	5339.73	3812.38	3111.66	5456.84	5748.55	5689.14	2019.73	3887.26	4810.25	4544.4	3232.6	4696.44	3343.55	2503.42	2644.19	2229.68
TRIB2	3845.28	4733.46	3330.55	4383.22	2409.91	4415.55	5699.25	3246.11	3232.07	5705.24	5288.32	4420.68	4018.9	4227.35	4798.15	5328.41	2509.71	3919.39	3307.18	4234.98	3151.79	4497.49	4908.11	3350.16	3681.11	2798.77
DAZAP1	3717.22	3771.55	3217.28	3125.23	4365.49	4116.33	4691.38	4264.52	4360.12	4510.99	4084.09	4594.96	5025.59	5084.15	4138.4	4426.05	4707.8	4361.66	4171.2	4371.91	4515.41	4650.53	3138.39	3709.39	3596.84	3463.77
MBD3	950.02	993.806	949.363	855.403	1355.8	1210.03	1141.83	1183.24	1007.16	1196.1	1038.67	1118.58	1041.58	1238.14	1119.26	1056.06	1018.78	1249.71	1122.68	1040.3	1095.61	1047.85	603.587	931.531	715.258	851.746
PRLH	0	0	0	0	0	0	0	0	0	0	0	0	0	0	0	0	0	0	0	0	0	0	0	0	0	0
HLTF	482.962	407.338	478.14	446.226	292.146	440.747	338.053	367.811	438.742	386.076	440.04	397.157	369.003	557.115	460.437	444.382	410.241	371.592	334.739	465.021	268.019	199.848	431.512	282.248	381.266	306.628
FAM50A	1339.24	1464.13	1722.34	1367.49	1469.08	1251.48	1271.29	1195.39	1013.98	1187.78	1031.7	1195.66	1072.99	1067.16	1130.33	1058.15	1328.3	1376.07	1247.66	1187	1609.14	1114.47	1154.23	1610.93	1558.98	1442.29
FAM3A	978.479	962.724	856.847	760.724	1012.37	979.549	1034.84	842.322	814.111	1100.96	1021.24	1058.25	919.453	800.132	931.947	1017.37	910.713	1002.33	961.832	1055.41	1111.97	1044.25	790.222	749.687	804.666	894.648
CPSF1	3628.49	3097.57	4450.25	3466.07	2584	5197.98	3470.43	4248.91	4172.93	3861.68	3004.47	4863.08	3157.89	4408.89	6328.94	3670.08	4198.93	3056.26	3640.83	4684	3068.92	3741.31	2966.31	3755.13	2869.25	3838.53
MYO3B	38.503	16.3589	14.6987	7.40965	20.2713	8.0871	78.2196	26.8918	15.5997	16.6253	41.8256	89.6537	1.74469	33.619	12.9181	13.5929	9.44288	2.14174	33.6913	33.7874	81.838	9.9024	17.2075	10.0405	11.3044	34.0698
CYBRD1	903.147	526.758	1414.53	981.367	1441.65	988.647	252.64	1088.69	912.584	723.199	347.675	372.859	1513.52	524.456	900.575	294.861	1520.3	1271.12	634.701	1358.61	1950.81	828.201	108.54	1316.41	300.08	444.17
CDH19	0	0	0	0	0	0	0	0	0	0	0	0	0	0	0	0	0	0	0	0	0	0	0	0	0	0
PDCD2	1874.93	1741.41	1493.21	1547.79	1900.74	2025.82	2092.15	1823.44	1632.12	2064.3	1945.76	1999.19	1880.78	1976.8	2070.58	2008.61	1984.05	2053.93	1995.39	1924.99	1917.05	1919.27	1817.38	1741.46	1739.85	1690.87
SLC6A15	0	0	0.864629	0	0	0	0	0.867479	0	0	0	0	0.872347	0	0	0	0	0	0	0	0	0	0	0	1.02767	0
RDH11	1152.58	1093.6	1299.54	1197.07	1111.35	1233.28	981.791	1288.21	1002.28	956.877	1138	1302.07	1086.07	1240.06	1188.46	1013.19	1348.23	1129.77	1194.41	1120.32	1262.35	1041.55	918.617	1383.35	1119.13	985.501
PRKACA	3267.73	3175.27	3780.16	3221.55	8596.24	6611.2	4239.15	6629.27	5487.21	5610.11	4192.14	5850.95	5830.76	4451.16	5031.59	3701.44	7302.49	6650.11	6741.52	6021.26	8540.82	5791.1	1785.61	4996.8	3835.26	3625.28
LPHN1	1236.28	838.396	844.743	967.371	717.844	1100.86	1333.33	1212.74	1200.2	1298.62	924.519	1035.63	1145.39	1045.07	953.17	1338.38	1059.7	1274.34	1071.6	1099.87	901.241	1149.58	643.297	522.103	904.35	659.945
SPP2	0.837022	3.27179	0	1.64659	1.19243	1.01089	0.899076	0.867479	1.94997	0	0.871366	0.837885	0	1.92109	0	1.04561	2.09842	0	0	0	1.02297	1.80044	7.94193	3.34682	1.02767	7.57107
ACTN1	4771.86	4690.93	4771.89	4751.23	4301.1	4379.16	3112.6	4786.75	4347.45	5849.33	5474.79	3788.91	4991.57	3254.32	4254.66	4758.55	4698.36	5450.73	3736.47	3601.91	5002.35	4557.8	3965.67	4582.91	2598.98	3512.98
ZFYVE26	1104.03	1096.05	1300.4	1411.95	1201.97	1199.92	1120.25	1437.41	1632.12	1225.65	1120.58	1501.49	1313.75	1429.29	1286.27	1142.85	1733.29	1252.92	1242.23	1476.86	1401.48	1450.25	1045.69	1205.97	1254.78	1327.46
RPS6KA6	0.837022	8.99742	2.59389	4.11647	2.38486	6.06532	1.79815	3.46991	0	9.23626	12.1991	5.02731	2.61704	8.64489	0.92272	7.31924	0	1.07087	9.78134	5.33485	4.0919	5.40131	3.97097	12.2717	11.3044	5.04738
EPN2	86.2133	118.602	103.755	127.611	153.824	172.862	111.485	115.375	128.698	157.94	154.232	71.2202	88.9793	133.515	165.167	86.7853	39.8699	136.001	90.2057	116.478	78.7691	112.527	101.921	72.5144	106.878	118.613
PTPN18	5396.28	5293.75	6275.48	5829.75	8595.05	7342.07	5029.43	7936.56	6226.24	5315.47	4092.81	7204.97	6117.77	5949.6	6038.28	3647.07	10468	8988.89	8501.08	7556.81	11434.8	5871.22	2612.9	6322.14	5111.63	4806.37
LIMS2	124.716	245.384	157.363	85.6226	78.7005	195.101	168.127	112.772	105.298	197.656	273.609	81.2748	129.98	149.845	297.116	327.275	75.543	197.04	122.81	138.706	155.492	100.824	236.934	127.179	182.925	79.4963
ASIC4	2.51107	2.45384	0.864629	3.29318	1.19243	1.01089	1.79815	1.73496	1.94997	6.46538	1.74273	0	0	0	3.69088	1.04561	2.09842	0	1.08682	0.889141	5.11487	0.900218	2.64731	1.11561	3.08301	1.26185
SPEG	450.318	283.828	209.24	259.338	226.562	329.549	417.171	288.87	312.97	601.281	431.326	269.799	400.407	246.86	297.116	537.441	107.019	358.742	174.977	263.186	118.665	291.671	215.756	184.075	187.036	121.137
LNX1	51.8954	64.6178	77.8166	60.9238	66.7762	56.6097	80.9169	74.6032	67.2738	66.5011	94.1075	72.896	62.809	84.5278	84.8903	73.1924	74.4938	85.6696	82.598	95.1381	60.3555	89.1216	62.2118	41.2774	91.4626	44.1646
ALDH3A2	1070.55	1183.57	1310.78	1096.63	1250.86	1470.84	913.462	1315.97	1172.9	1112.97	859.167	1189.8	1332.07	1032.58	1044.52	831.257	1542.34	1317.17	1161.81	1066.08	1293.04	1170.28	730.658	1262.87	1043.08	903.481
TFRC	2524.46	2202.73	1836.47	1942.97	5029.68	2512.05	3786.91	2251.11	2303.89	2781.96	3183.97	2377.08	3149.17	3566.5	2952.7	3211.06	2397.44	2261.68	3451.73	2297.54	3568.14	3295.7	3360.76	2780.09	5033.53	4643.59
SREBF1	2182.95	2128.3	1530.39	1726.45	3510.52	2497.9	2863.56	2192.12	2165.44	4196.03	2787.5	2837.08	4660.08	3415.69	2114.87	3137.86	2008.19	4006.13	2575.75	2312.66	2219.86	3517.15	2153.59	2213.36	1491.15	1947.03
TRPC5	0.837022	1.63589	0	0.823294	0	0	6.29353	1.73496	21.4496	7.38901	1.74273	1.67577	3.48939	2.88163	0	5.22803	1.04921	1.07087	4.34726	5.33485	4.0919	3.60087	2.64731	0	2.05534	5.04738
AFF4	3399.98	2903.71	2818.69	3123.58	4887.78	3122.63	4899.97	4319.18	5136.21	4656.92	4620.85	3602.07	4915.67	4706.66	4241.74	4785.74	4154.87	4045.75	4443.99	4414.59	5087.25	4874.68	4882.97	3412.64	4185.7	4625.93
UBE2D1	1001.92	1244.1	1377.35	1322.21	1729.03	1496.11	1042.93	1672.5	1378.63	878.369	1361.07	1557.63	1473.39	1089.26	1087.89	927.452	2130.94	1848.32	1526.98	1130.99	1843.4	1357.53	888.173	2152	1070.83	1382.98
MPP5	407.63	337.812	357.956	366.366	542.557	348.756	467.52	398.173	454.342	583.732	498.421	324.261	536.493	409.191	428.142	466.34	355.682	512.947	426.032	398.335	483.867	512.224	623.442	430.624	458.341	569.092
RHOBTB1	69.4728	43.3512	128.83	162.189	120.436	146.579	93.5039	279.328	149.172	118.224	307.592	168.415	84.6176	138.318	143.944	108.743	182.562	69.6066	267.357	152.932	570.82	152.137	84.7139	83.6704	84.2689	102.209
ASAH2C	0.837022	0	0.864629	0	0	1.01089	0	1.73496	3.89993	0	2.6141	0	2.61704	1.92109	0.92272	0	1.04921	3.21261	1.08682	0	1.02297	0	1.32366	0	0	0
SMC1A	4647.15	3965.41	5135.03	4956.23	3325.69	3549.22	3851.64	4205.54	4505.4	2842	3779.99	4660.31	4087.82	5190.77	4679.11	3817.51	4755.01	3548.86	3784.29	4306.11	4032.57	4096.89	3203.25	4318.51	4626.57	4277.66
HSD17B10	785.964	929.188	1012.48	880.925	837.087	779.394	802.875	747.767	623.014	718.581	671.823	957.702	767.665	953.819	781.544	789.432	763.824	867.405	981.395	737.987	881.804	775.088	888.173	1075.44	1265.06	1003.17
MARK2	3295.36	2790.84	3184.43	2882.35	3889.71	4534.84	3571.13	4493.54	3880.43	3663.1	3922.89	4308.4	3535.62	4020.83	4413.37	3739.09	5588.09	4402.35	4252.71	4441.26	4294.45	4130.2	2488.47	3251.99	2616.45	2335.68
HMMR	41.0141	26.1743	30.262	22.229	15.5016	24.2613	69.2289	14.7471	1.94997	14.778	73.1947	77.0854	56.7025	265.11	107.958	59.5995	48.2636	7.49609	63.0353	64.9073	23.5284	70.217	66.1828	72.5144	115.099	61.8304
CHFR	1637.22	1552.46	1487.16	1324.68	1913.85	1870.14	1840.41	1924.94	1849.54	2049.53	1744.47	2228.77	1977.61	1871.14	1845.44	1676.11	2419.48	1870.81	2009.52	1989.9	2034.7	1949.87	1266.74	1686.8	1551.78	1521.79
TRHDE	0	0	0.864629	3.29318	9.53946	2.02177	2.69723	4.33739	0	1.84725	3.48546	6.70308	0	1.92109	0.92272	3.13682	3.14763	0	4.34726	4.44571	19.4365	0.900218	1.32366	0	1.02767	0
P4HA2	2.51107	13.0872	5.18777	16.4659	25.0411	9.09798	10.7889	19.0845	17.5497	14.778	17.4273	11.7304	18.3193	10.566	13.8408	15.6841	13.6397	20.3465	11.955	8.00227	34.7811	15.3037	14.5602	32.3526	8.22136	16.404
FCGR2B	446.97	655.994	734.935	641.346	667.762	571.151	425.263	706.995	826.786	237.372	784.229	460.837	500.727	583.05	851.671	675.461	453.258	647.877	576.013	895.365	659.819	782.29	741.247	451.82	530.278	668.778
NFATC3	2483.44	1896.82	2205.67	2040.95	3505.75	2756.69	3625.97	2882.63	2766.03	3390.63	3544.72	3155.47	3048.85	3881.55	3288.57	3779.86	3340.68	2831.38	3166.98	3671.26	3194.75	3431.63	2778.35	1859.71	2237.24	2056.81
TRNT1	380.845	361.533	380.437	428.113	282.606	372.006	389.3	399.04	506.016	338.971	401.7	472.567	403.896	471.627	357.093	325.183	390.306	327.686	338	400.114	307.915	313.276	277.968	254.358	180.87	278.868
ACADVL	5987.22	7588.1	7733.24	6353.36	7469.4	6672.86	7055.05	5816.44	4924.64	5135.36	5083.55	4434.92	4482.12	4980.41	6507.02	5037.73	7040.19	6420.94	6803.47	4845.82	6814.04	5663.27	4528.23	6270.82	5603.88	5966.01
STK10	11564.3	10712.7	11918	10399.9	13796.4	10987.3	12152.8	11398.7	10396.2	12244.5	11346.1	11836	11030.8	12527.4	12154.1	11093.9	13018.6	11057.8	13927.5	13418.9	12157	12044.9	9272.21	9056.49	10441.1	10494.8
FBXW11	1370.21	1315.26	1481.97	1374.08	1225.82	1285.85	1289.28	1390.57	1429.33	1068.64	1393.31	1256.83	1091.31	1357.25	1324.1	1471.17	1481.48	1240.07	1406.34	1343.49	1383.06	1283.71	1592.36	1250.59	1298.97	1340.08
ACAP1	9940.48	9821.91	8995.6	9020.84	7445.55	9207.16	10218	7084.7	6790.76	10642.9	8991.63	8328.57	7951.44	8559.4	9900.79	10777.1	6470.47	8791.85	7031.7	9261.3	6040.67	8904.06	9192.79	6929.03	8167.92	6488.41
CRMP1	10.8813	4.90768	7.78166	4.11647	5.96216	3.03266	8.99076	6.07235	10.7248	3.69451	26.141	15.0819	10.4682	16.3292	11.0726	41.8242	7.34446	5.35435	10.8682	14.2263	28.6433	5.40131	39.7097	13.3873	13.3597	10.0948
EVC	29.2958	63.7999	64.8472	52.6908	75.1232	57.6206	105.192	45.1089	43.8742	45.2577	240.497	162.55	54.9578	110.462	90.4266	79.466	37.7715	86.7405	64.1221	122.701	81.838	68.4166	43.6806	114.907	106.878	50.4738
DERL2	956.716	905.467	945.04	908.917	1539.43	1169.6	1284.78	1056.59	971.083	1220.11	1027.34	1075.84	1113.99	1387.98	1075.89	1085.34	1217.08	1064.45	1292.22	1062.52	1296.11	1097.37	1105.25	1039.74	1097.55	1322.41
SIDT1	1515.01	1357.79	1426.64	1392.19	1624.09	1384.92	1700.15	1399.24	1447.85	1385.44	1766.26	1292.86	1316.37	2057.48	1931.25	1909.28	1316.76	1196.16	1404.17	1740.94	1215.29	1606.89	1972.25	1081.02	1311.31	1299.7
NDE1	948.346	952.09	983.083	847.993	1240.13	1140.28	992.58	1178.04	1009.11	1225.65	1183.31	1066.63	1147.14	990.32	1221.68	1142.85	1333.54	1274.34	1115.07	1146.99	1320.66	1202.69	1130.4	1047.55	944.429	1025.88
MRVI1	241.899	172.587	472.952	200.884	172.903	421.54	105.192	476.246	375.369	273.393	143.775	434.024	369.003	206.517	235.294	156.841	1275.84	549.357	368.431	272.077	347.811	227.755	107.216	468.554	178.815	273.82
TMEM38A	82.0282	98.1537	89.9214	110.321	137.13	173.873	91.7058	104.097	111.148	145.009	109.792	134.062	163.129	77.804	158.708	122.336	208.793	266.647	119.55	102.251	149.354	119.729	95.3032	255.474	163.4	167.825
AP1M1	2464.19	2134.02	2670.84	2548.1	3019.24	3141.84	2255.78	2650.15	2345.81	2515.03	2597.54	2729.83	2741.79	2851.85	2813.37	2349.48	3241.01	2764.99	2982.22	3001.74	3020.84	2982.42	1687.66	2574.82	2052.26	1965.96
PVR	299.654	395.068	479.005	400.121	589.062	628.772	222.072	490.993	489.442	328.811	208.256	312.531	533.004	198.832	317.416	179.844	455.357	532.223	293.44	319.202	624.015	268.265	116.482	568.959	250.751	363.411
IKBKG	876.362	1064.97	1155.14	1025.82	1497.69	1399.07	1138.23	1491.2	1275.28	1233.96	1234.73	1297.88	1184.65	1357.25	1216.15	1140.76	1520.3	1250.78	1504.15	1224.35	1338.05	1194.59	663.151	1101.1	838.579	916.1
XRCC1	598.471	697.709	776.437	684.158	538.979	600.467	518.767	593.355	559.64	536.627	523.691	534.57	574.004	559.036	679.122	518.62	600.147	636.097	541.234	507.7	547.292	591.443	525.491	719.566	559.052	555.212
SCARB1	426.881	503.855	425.398	691.567	603.371	526.672	282.31	497.933	479.692	442.417	383.401	419.78	372.492	495.64	466.896	321.001	188.858	675.719	338	328.093	547.292	533.829	203.843	446.242	283.637	315.461
CYP2W1	5.85916	5.72563	1.72926	5.76306	15.5016	3.03266	26.9723	8.67479	5.8499	29.556	5.2282	9.21673	10.4682	9.60543	22.1453	20.9121	7.34446	14.9922	4.34726	11.5588	6.13785	19.8048	3.97097	1.11561	5.13835	3.78554
MCM2	500.539	435.966	443.555	382.832	484.128	348.756	626.656	320.1	262.27	409.166	642.197	706.337	714.452	1223.73	694.808	729.833	542.441	278.426	494.501	428.566	344.743	693.168	696.243	469.67	665.93	588.02
MOV10L1	1.67404	5.72563	1.72926	6.58636	17.8865	0	0.899076	5.20487	5.8499	1.84725	0	5.02731	5.23408	1.92109	1.84544	2.09121	5.24604	4.28348	2.17363	5.33485	1.02297	6.30153	2.64731	14.5029	0	3.78554
PANX2	15.9034	31.8999	61.3887	38.6948	176.48	120.296	65.6326	154.411	112.123	246.608	143.775	179.307	103.809	91.2516	93.1947	122.336	287.483	179.906	158.675	85.3576	152.423	104.425	22.5021	112.676	43.1621	93.3766
	1107.38	1020.8	1137.85	1058.76	1662.25	1773.1	1550.01	1579.68	1569.72	1700.4	1351.49	1761.23	1566.73	1422.56	1409.92	1555.86	1870.74	1682.34	1950.83	1448.41	1729.85	1499.76	880.231	1124.53	1079.05	1188.66
TP63	31.8068	40.0794	23.345	40.3414	33.3881	24.2613	43.1557	8.67479	8.77485	23.0907	67.9665	67.0308	41.8726	109.502	115.34	18.8209	9.44288	12.8504	42.3858	17.7828	11.2527	63.9155	19.8548	58.0115	68.8539	46.6883
ALPK1	559.131	573.381	410.699	559.84	503.206	622.706	487.299	916.057	979.858	796.166	797.3	1074.17	1060.77	616.668	597	833.348	1062.85	651.089	501.022	697.087	886.919	689.567	800.812	739.647	583.717	468.145
LLGL2	1561.88	1415.87	1890.94	1263.76	1969.9	1504.2	1794.56	1501.61	1225.55	1214.57	1375.02	2006.73	935.155	2019.06	1243.83	1116.71	1929.5	988.413	1944.31	1975.67	1224.5	1151.38	726.687	769.768	896.128	1312.32
PDE8A	696.402	570.927	660.577	710.503	796.545	1137.25	873.003	848.394	1011.06	882.063	590.786	741.528	970.922	626.274	774.162	895.038	892.877	787.09	908.578	1087.42	1247.01	918.223	750.513	741.878	734.784	564.045
CLCN4	141.457	131.689	161.686	186.888	197.944	175.894	170.825	382.558	424.118	121.919	437.426	164.225	94.2134	213.241	465.051	406.741	463.75	159.56	194.54	292.527	144.239	221.454	578.437	186.306	90.435	88.3292
NLE1	392.563	474.409	341.529	312.029	317.187	457.932	297.594	275.858	277.87	285.401	285.808	209.471	391.684	286.242	324.798	363.871	193.054	305.198	242.36	256.073	190.273	277.267	469.898	268.861	254.862	246.06
SDHA	2581.38	2782.66	3016.69	2540.69	2366.98	2296.74	2330.41	1990	1868.07	2002.42	2109.58	2160.9	2152.08	2782.69	2352.94	2427.9	2376.46	2239.19	2479.03	2214.85	1881.25	2345.07	2538.77	2656.26	2623.64	2830.32
SMARCE1	1469.81	1316.89	1450.85	1148.5	1545.39	1437.48	1304.56	1518.09	1570.7	1316.17	1488.29	1348.99	1261.41	1371.66	1638.75	1622.78	1522.4	1582.75	1411.77	1507.98	1227.57	1520.47	1780.32	1544	1498.34	1364.05
FNDC8	3.34809	8.17947	2.59389	4.11647	1.19243	6.06532	4.49538	1.73496	6.82488	6.46538	1.74273	4.18942	10.4682	8.64489	1.84544	5.22803	3.14763	1.07087	1.08682	6.22399	4.0919	8.10196	0	1.11561	3.08301	2.52369
GSDMB	2070.79	1231.83	1075.6	1735.5	703.535	1316.17	1112.16	1186.71	1445.9	928.244	1293.98	1287.83	1232.63	1325.55	1380.39	1899.87	808.94	799.94	654.263	1240.35	561.613	1099.17	1417.64	812.161	919.765	893.387
KDM5A	3944.05	3203.08	3228.53	3783.86	3278	3113.53	3562.14	3450.83	3746.86	3325.05	3946.42	3657.37	3501.6	4187.97	3310.72	3835.28	3980.7	2786.4	3678.87	4307.89	3462.77	3416.33	4304.53	3161.63	3895.9	4458.1
ADAM11	25.9477	30.264	16.428	23.0522	38.1578	51.5552	26.9723	32.9642	35.0994	41.5632	27.0123	20.1092	43.6173	16.3292	31.3725	34.505	24.1318	28.9135	23.91	24.0068	13.2987	21.6052	14.5602	23.4277	18.4981	15.1421
PPP2R3A	29.2958	32.7179	36.3144	36.225	44.12	33.3593	31.4677	27.7593	50.6991	37.8687	40.0828	20.1092	51.4684	39.3823	36.9088	35.5506	58.7557	50.3309	42.3858	24.896	48.0798	25.2061	26.4731	42.393	43.1621	40.3791
FERMT2	10.8813	11.4513	8.64629	12.3494	9.53946	13.1415	8.99076	10.4097	4.87492	18.4725	8.71366	5.86519	8.72347	8.64489	7.38176	7.31924	13.6397	8.56696	8.69453	10.6697	10.2297	9.9024	13.2366	8.92485	9.24903	12.6185
ABCB11	0	0.817947	0	0	0	4.04355	0	3.46991	0	0.923626	1.74273	2.51365	0.872347	0	3.69088	1.04561	1.04921	0	1.08682	1.77828	0	2.70065	2.64731	0	1.02767	1.26185
DHRS9	47.7103	116.148	76.0874	121.848	32.1957	69.7512	29.6695	102.362	87.7485	84.9736	112.406	169.253	245.129	116.226	144.867	127.564	204.596	62.1105	65.209	114.699	84.9069	116.128	168.104	161.763	62.6879	46.6883
CD5L	0.837022	0	2.59389	0.823294	1.19243	0	1.79815	0.867479	0	0.923626	1.74273	1.67577	0	3.84217	0.92272	1.04561	3.14763	0	13.0418	4.44571	2.04595	0	1.32366	2.23121	0	6.30923
PTGS2	2473.4	2099.67	2232.47	1089.22	9150.73	2874.96	2366.37	2901.72	2707.53	8481.66	10358.8	986.19	7113.99	7257.86	5696.87	6687.69	5102.3	7203.75	4064.69	7853.78	4390.61	4567.71	4597.06	7830.44	5272.97	2193.09
IGF2BP2	204.233	232.297	298.297	310.382	587.869	385.148	724.656	493.595	337.344	352.825	230.041	241.311	387.322	204.596	334.947	397.33	411.29	336.253	468.418	388.555	734.496	301.573	87.3613	394.924	169.566	254.893
MAP3K13	308.024	372.984	303.485	305.442	434.045	325.506	360.53	333.979	336.369	435.028	365.102	389.616	444.024	400.546	261.13	392.102	310.566	333.041	358.649	361.88	431.695	398.797	410.333	390.462	317.55	358.364
ST6GAL1	7212.62	6065.9	7230.03	6241.4	4977.21	6390.83	7102.7	6279.68	6382.24	5982.33	9235.61	6413.17	5095.38	10042.5	9994.91	8600.11	4134.93	5906.92	7384.92	9193.72	5289.8	7303.47	8954.53	5042.54	6978.91	4808.89
TBX21	1732.64	1439.59	2372.54	1638.36	3226.72	1796.35	2174.87	2100.17	1464.42	1232.12	1463.89	3486.44	715.324	3511.74	1676.58	1489.99	4467.53	924.161	4002.74	3134.22	1806.57	1477.26	832.579	769.768	858.104	1764.06
VDAC1P1	0	3.27179	0	1.64659	0	3.03266	1.79815	0.867479	0.974983	2.77088	0.871366	2.51365	0	0	0.92272	3.13682	0	0	0	0	0	0	2.64731	1.11561	4.11068	1.26185
FRY	678.825	802.406	1199.24	1232.47	1392.76	1703.34	1093.28	2054.19	2143.99	1672.69	1187.67	1581.09	1727.25	1263.11	1388.69	959.866	2164.52	1821.55	1573.71	1400.4	3200.89	1688.81	835.227	1607.59	1492.18	1600.02
PICALM	4889.88	4909.32	7045.86	6181.29	8908.66	8199.3	5551.8	8092.71	7369.9	6273.27	6318.27	7497.39	7629.54	6346.31	6172.08	5491.52	11166.7	8475.94	7915.28	6796.6	9019.57	7094.62	5139.75	9195.94	7310.84	7968.55
NSF	896.451	960.27	1290.89	1124.62	1033.84	1053.34	937.737	1012.35	1093.93	621.601	761.574	1253.48	826.112	1046.03	996.538	817.664	1292.63	1026.96	873.8	1133.66	1072.08	1008.24	728.011	1093.29	1143.8	1099.07
GLI2	0.837022	0	0	0	0	0	0	0	0	0	0	0	0.872347	0	0	0	0	0	0	0	0	0	0	0	0	0
CLASP1	2185.46	1583.55	1937.63	1684.46	2708.01	1815.55	2384.35	2191.25	2202.49	2306.29	2285.59	1865.97	2293.4	2419.61	2368.62	2568.01	4275.53	1976.83	2361.65	2102.82	2136.99	2389.18	2242.27	1613.17	1938.19	2702.87
MRPS34	685.521	782.775	712.454	755.784	1002.84	1079.63	908.067	752.971	671.763	835.882	918.42	1057.41	915.964	1030.66	1071.28	795.706	805.792	962.713	845.543	853.576	790.76	829.101	493.723	790.964	733.756	594.329
NOTCH3	21.7626	31.8999	18.1572	14.8193	27.4259	32.3484	9.88984	25.1569	15.5997	17.5489	36.5974	31.0017	14.8299	7.68434	13.8408	11.5017	48.2636	25.7009	43.4726	24.896	33.7582	15.3037	6.61828	17.8497	8.22136	52.9975
CLNS1A	1699.99	1824.02	1667.87	1834.3	1364.14	1628.54	1443.92	1801.75	1709.15	1413.15	1612.03	1488.92	1688.86	1419.68	1592.62	1526.58	1600.04	1776.57	1367.21	1673.36	1606.07	1543.87	1914.01	1871.99	1836.45	1499.07
PPP2R2C	0.837022	0.817947	5.18777	0.823294	0	0	0.899076	3.46991	2.92495	0	0.871366	0	0.872347	4.80271	1.84544	0	0	0	1.08682	0.889141	0	0	1.32366	0	1.02767	3.78554
TEAD2	88.7244	47.4409	54.4716	56.8073	51.2746	49.5335	68.3298	76.3381	115.048	84.05	100.207	41.8942	75.0218	39.3823	71.0495	125.473	15.7381	53.5435	32.6045	75.577	54.2177	64.8157	105.892	15.6185	35.9684	13.8803
EED	640.322	602.827	625.991	604.298	487.705	454.899	658.124	478.848	486.517	559.718	584.687	648.523	493.748	694.472	527.796	599.132	510.965	403.718	526.019	505.921	483.867	528.428	688.301	639.242	720.397	623.352
CDHR2	35.992	56.4384	48.4192	37.8715	26.2335	58.6314	49.4492	45.9764	61.4239	57.2648	60.9956	56.1383	49.7238	61.4747	47.0587	58.5539	40.9191	73.8901	39.1254	54.2376	25.5744	36.9089	13.2366	24.5433	17.4704	30.2843
SNCB	1.67404	0	0	0	0	2.02177	0	0	0	0	9.58503	0	1.74469	0	2.76816	5.22803	0	0	6.5209	2.66742	0	1.80044	3.97097	1.11561	0	0
TSG101	790.986	799.952	932.935	854.58	1061.26	992.691	907.168	1014.08	872.61	913.466	886.179	1172.2	1013.67	1052.75	1023.3	873.081	1378.66	1029.11	1058.56	1026.07	1172.33	911.921	971.563	1070.98	1109.88	962.788
C17orf85	1290.69	1138.58	1417.99	1276.93	1453.57	1507.23	1237.13	1494.67	1461.5	1237.66	1527.5	1462.11	1264.03	1428.33	1405.3	1223.36	1722.8	1433.9	1307.44	1538.21	1390.22	1384.54	1107.9	1296.33	1182.85	1395.6
ATP2A3	12043.9	12980.8	12871.7	10794.2	14713.4	14563.8	14352.9	14326.4	12375.5	14045.6	18610.6	13769	10764.8	17015.1	18025.3	18020	11659.9	12658.8	14457.9	14556.1	12300.2	14893.2	12603.8	9259.53	10175	8850.58
CA12	3.34809	0	4.32315	1.64659	0	0	2.69723	0.867479	0.974983	1.84725	0	0.837885	0.872347	2.88163	0	0	1.04921	4.28348	0	3.55657	0	0	5.29462	1.11561	1.02767	1.26185
MGLL	282.913	363.169	393.406	476.687	616.487	674.262	341.649	834.514	444.592	500.605	714.52	913.294	629.834	745.381	450.287	387.92	561.327	476.537	1194.41	794.892	2085.85	423.103	165.457	354.763	364.823	367.197
NTN4	11.7183	28.6281	58.7948	21.4057	60.814	39.4246	30.5686	40.7715	34.1244	48.0286	7.84229	3.35154	4.36173	19.2109	13.8408	12.5473	0	49.26	15.2154	25.7851	13.2987	23.4057	7.94193	5.57803	39.0515	40.3791
BCS1L	596.797	646.996	626.856	591.949	424.506	516.563	457.63	396.438	405.593	494.14	438.297	399.671	375.109	429.363	433.679	380.6	363.026	440.128	341.26	419.675	274.157	397.896	428.864	371.497	402.847	387.387
NUAK1	62.7767	8.99742	39.7729	18.1125	64.3913	34.3702	51.2474	119.712	70.1988	53.5703	71.452	19.2713	18.3193	259.347	6.45904	5.22803	122.757	21.4174	142.373	40.0114	42.9649	4.50109	0	1.11561	1.02767	241.012
DPP8	2279.21	2100.49	2167.63	2200.67	2025.94	2473.64	2455.38	2691.79	2733.85	2331.23	2430.24	2792.67	2378.89	2660.7	2699.88	2389.21	2662.89	2537.96	2329.05	2490.48	2083.8	2474.7	2067.55	2225.63	2235.18	2408.86
SLC24A1	301.328	396.704	332.018	372.129	323.149	378.072	317.374	392.1	537.216	374.069	393.857	395.482	380.343	345.795	338.638	335.639	378.764	389.797	376.038	451.684	399.983	333.081	321.648	237.624	301.107	368.459
ZNF532	316.394	614.278	523.101	460.222	938.444	626.75	724.656	853.599	949.634	556.023	880.951	377.048	730.154	730.973	618.223	718.331	535.096	646.806	778.16	662.41	487.959	711.172	603.587	604.658	485.06	638.494
SCARF1	169.916	335.358	382.166	270.864	604.563	542.846	242.751	543.909	546.966	542.169	345.061	523.678	608.026	353.48	360.784	440.2	553.982	789.232	382.559	401.892	468.522	459.111	284.586	445.127	233.281	273.82
LMAN1	1977.05	1675.97	2180.59	1701.75	1862.58	1783.2	2682.84	2026.43	1913.89	1839.86	2779.66	2277.37	1831.93	6358.79	3013.6	2930.83	1598.99	1852.61	2382.3	2321.55	1963.09	2619.63	2009.31	2141.96	3053.21	2662.49
PTPLAD1	531.509	438.42	542.987	440.463	544.942	515.552	570.913	477.113	503.091	454.424	619.541	780.908	520.791	824.146	580.391	590.767	496.276	454.049	542.321	594.836	437.833	605.847	557.259	504.254	663.875	537.546
IPCEF1	2979.8	3178.54	2169.35	2406.49	2486.22	2321	2568.66	2083.68	2809.9	3259.48	2782.27	2152.53	2976.45	2383.11	2540.25	2671.52	2371.21	2671.82	1620.44	2445.14	1600.96	2734.86	2536.12	2377.36	2290.68	2634.73
ZZEF1	4990.33	4825.07	5132.44	5766.35	6341.35	5541.68	6199.13	6201.6	6586.99	6268.65	5896.53	6476.01	6434.43	6491.35	5312.1	5539.62	6572.24	5926.2	5553.63	6518.29	6236.05	6904.67	5203.29	4661	6013.92	6265.06
NOX3	0	0	0	0	0	0	0	0	0	0	0	0.837885	0	0.960543	0	0	0	0	0	0	0	0	0	0	0	0
ENO1	14415.2	16164.3	17325.4	15376.7	17184.1	13554	11656.5	13055.6	11433.6	11404.9	11721.6	14704.9	14296	13703.1	13773.4	11778.7	16233.4	14798.4	14452.5	11983.8	14506.8	13089.2	12492.7	20877.4	19113.6	18658.9
SLC12A1	1.67404	28.6281	63.9826	2.46988	0	3.03266	10.7889	2.60244	9.74983	4.61813	5.2282	100.546	3.48939	4.80271	6.45904	4.18242	3.14763	4.28348	3.26045	7.11313	0	4.50109	3.97097	5.57803	4.11068	13.8803
C19orf10	760.016	788.501	865.494	770.604	1421.38	856.221	1112.16	812.827	722.463	717.658	1026.47	992.055	901.134	2808.63	1410.84	1060.24	1046.06	968.067	1241.14	940.711	1146.75	1228.8	722.716	1219.36	1597	1499.07
ANO8	833.674	885.019	790.271	824.941	1280.67	1408.17	1222.74	1194.52	1075.41	1305.08	1102.28	1126.12	1164.58	1008.57	1162.63	1082.2	981.01	1562.4	1150.94	1290.14	1052.64	1096.47	422.246	625.855	689.567	726.823
TUBE1	378.334	298.551	331.153	367.189	289.761	395.257	346.144	308.822	315.895	342.665	353.775	289.908	348.066	298.729	320.184	387.92	261.253	365.167	289.093	323.647	261.882	354.686	447.396	258.821	349.408	291.486
ARHGEF10L	498.865	900.56	1364.38	1061.23	939.637	1076.59	293.099	1168.49	1136.83	765.686	216.099	1131.98	1130.56	535.983	576.7	357.597	1189.8	1179.03	965.093	820.677	1420.91	902.919	75.4484	1338.73	744.033	883.292
TXK	2512.74	1631.8	1221.72	2123.28	2494.57	1880.25	1906.94	1638.67	2149.84	2600.93	1338.42	1833.29	2914.51	1648.29	1663.66	2258.51	4019.52	1384.64	1449.81	1533.77	1127.32	1987.68	2624.81	1355.46	1345.22	1967.22
WSCD2	3.34809	8.99742	6.0524	4.93977	9.53946	5.05443	3.59631	5.20487	2.92495	6.46538	6.09956	0	6.97877	5.76326	11.0726	5.22803	2.09842	1.07087	7.60771	4.44571	12.2757	4.50109	3.97097	2.23121	8.22136	1.26185
KCNQ2	2.51107	0.817947	1.72926	2.46988	4.76973	2.02177	1.79815	2.60244	0	0.923626	0	0	0	0.960543	0	2.09121	0	3.21261	2.17363	0	0	1.80044	1.32366	3.34682	0	1.26185
TACR2	20.9256	16.3589	6.0524	13.996	29.8108	30.3266	32.3667	26.8918	28.2745	47.1049	27.8837	15.9198	41.0003	30.7374	14.7635	23.0033	27.2794	23.5591	29.344	16.8937	38.873	32.4079	15.8839	18.9653	22.6087	18.9277
ACTR6	749.135	658.447	735.799	690.744	366.077	492.302	626.656	442.414	401.693	520.002	618.67	585.681	456.237	518.693	560.091	567.764	534.047	446.553	498.849	604.616	396.914	491.519	954.356	702.832	823.164	584.234
TIPIN	93.7465	86.7024	64.8472	76.5664	90.6249	87.9472	79.1187	85.8804	77.9987	119.148	127.219	108.925	109.043	134.476	119.031	92.0133	111.216	84.5988	81.5112	75.577	53.1947	108.926	101.921	94.8265	120.237	92.1147
SRI	905.658	1095.23	934.664	853.756	826.356	809.72	1009.66	875.286	817.036	785.082	945.432	903.24	993.603	769.395	941.175	658.732	1139.44	930.586	996.61	1017.18	1173.35	844.405	933.177	1110.03	1648.38	1008.21
EIF4G3	1951.1	1791.3	2438.25	2267.35	2507.69	2191.6	2149.69	2667.5	2538.86	1574.78	2445.92	3216.64	1817.97	2608.83	2411.07	2307.65	3420.42	2116.04	2269.27	2938.61	2390.69	2060.6	1959.01	2049.37	1879.61	2446.72
NUP37	220.137	220.028	227.397	213.233	127.59	192.069	188.806	148.339	167.697	155.169	210.871	195.227	190.172	296.808	248.212	190.3	195.153	154.205	181.498	216.95	128.895	162.039	227.669	242.086	256.917	225.87
SEMA3A	9.20724	17.1769	6.0524	4.93977	4.76973	7.07621	23.376	9.54227	6.82488	12.0071	8.71366	1.67577	36.6386	15.3687	6.45904	12.5473	9.44288	6.42522	19.5627	46.2353	31.7122	20.705	14.5602	4.46242	12.332	1.26185
GTSE1	41.8511	28.6281	29.3974	32.1085	29.8108	43.4681	61.1372	14.7471	12.6748	43.4104	65.3524	136.575	88.107	320.821	84.8903	88.8765	71.3462	14.9922	58.6881	42.6788	41.942	102.625	33.0914	50.2023	62.6879	45.4264
SEMA3C	170.753	183.22	364.009	245.342	345.805	408.398	183.412	551.716	518.691	316.804	231.783	182.659	276.534	202.675	259.284	174.616	648.411	363.025	377.125	261.408	552.406	253.862	72.8011	291.173	211.7	301.581
TTC38	1956.12	1127.13	1655.76	1409.48	2481.45	1331.34	1077.99	1295.15	934.034	1016.91	868.752	1799.78	748.473	1783.73	1611.99	1370.79	3479.18	575.057	1780.2	1531.1	1387.15	1515.97	864.347	1030.82	1020.48	1184.87
ACAT1	493.843	395.068	441.825	444.579	367.269	445.801	474.712	419.86	433.867	474.744	485.351	584.006	534.748	794.369	494.578	496.663	446.963	376.946	446.681	482.804	352.926	463.612	461.956	493.098	697.788	445.431
GRAMD4	1217.87	1550.83	1838.2	1663.05	2321.67	1908.55	1491.57	2408.99	2119.61	1416.84	1306.18	2064.55	1533.59	1773.16	1762.4	1381.25	3995.39	2181.36	2191.02	1713.38	2306.81	1875.15	790.222	1889.84	1359.61	1393.08
CELSR1	417.674	296.915	192.812	267.571	305.263	532.737	479.208	382.558	435.817	379.61	788.586	162.55	222.448	237.254	498.269	816.618	290.631	239.875	508.63	516.591	158.561	496.92	757.131	185.191	372.017	133.756
WNT8B	8.37022	9.81537	6.91703	5.76306	3.5773	10.1089	11.688	11.2772	17.5497	13.8544	13.9419	13.4062	11.3405	17.2898	2.76816	15.6841	8.39367	9.63783	17.3891	20.4502	13.2987	18.9046	17.2075	8.92485	10.2767	11.3566
ZNF638	3603.38	3356.04	3477.54	3611.79	2630.51	3404.67	3316.69	3582.69	4057.88	3164.34	3323.39	3353.21	2936.32	3178.44	3593.07	3190.14	3545.28	3110.88	2736.6	3435.64	2811.13	3137.26	3620.2	3240.83	3126.17	2802.56
SLC25A40	734.905	633.909	946.769	857.05	746.463	1073.56	653.629	900.443	872.61	581.885	701.45	790.125	720.558	725.21	880.275	698.465	1164.62	886.681	635.787	871.358	628.107	678.764	600.94	982.849	734.784	662.469
TIMM21	306.35	276.466	265.441	282.39	253.988	286.081	239.154	210.797	251.546	246.608	209.999	258.906	235.534	286.242	301.73	281.268	216.137	216.316	202.148	270.299	159.584	216.953	239.582	210.849	215.811	252.369
ADD2	238.551	266.651	209.24	188.534	336.266	227.45	304.787	342.654	370.494	135.773	428.712	125.683	166.618	192.109	440.138	303.226	95.478	282.71	376.038	437.457	375.432	271.866	307.088	169.572	249.724	84.5436
FGF4	0	0	0	0	0	0	0	0	0	0	0	0	0	0	0	0	0	0	0	0	0	0	0	0	0	0
RASAL2	20.0885	40.0794	31.1266	63.3937	44.12	56.6097	38.6603	41.639	64.3489	38.7923	48.7965	31.8396	51.4684	39.3823	65.5131	75.2836	34.6239	72.8192	53.254	42.6788	73.6542	65.7159	78.0957	41.2774	39.0515	61.8304
VPS9D1	759.179	1128.77	933.799	661.929	1124.46	974.495	902.673	975.913	1038.36	1041.85	919.291	837.047	1116.6	1168.98	826.757	1019.47	1346.13	1237.93	1111.81	954.049	1119.13	1127.07	641.973	770.884	707.037	895.91
ZNF37A	751.646	663.355	625.127	787.069	707.112	764.231	1021.35	726.08	994.483	921.779	1045.64	998.759	943.879	1000.89	969.779	991.234	804.743	817.074	742.295	1018.96	831.679	985.739	839.198	657.092	973.203	786.13
MARK3	2146.96	2144.66	2647.49	2088.7	3560.6	2689.97	3069.45	3142.88	3045.85	2654.5	2660.28	3271.94	2670.25	2626.12	2741.4	2633.88	2730.04	2816.39	2660.53	2902.16	2935.94	2917.61	2299.19	2961.93	2327.67	2494.67
SLC25A3	7327.29	7139.04	5958.16	6175.53	10144	7342.07	7398.5	6732.5	5844.05	8469.65	6770.51	6084.72	8710.38	7430.76	7024.67	7073.52	7688.6	7897.67	8226.11	5787.42	8454.89	7199.04	7143.77	7643.01	7503.02	8027.86
FNDC3B	1432.98	994.624	1553.74	1556.03	2671.05	1724.57	1826.92	2366.48	2339.96	1696.7	1383.73	2574.82	1884.27	2790.38	1736.56	1872.68	3734.13	1833.33	1934.53	1958.78	2412.17	2441.39	1430.87	2102.92	1752.18	3001.93
FOSL2	8104.05	3682.4	7581.07	4202.92	31489.8	8611.75	13804.4	8882.11	7449.85	15924.2	8322.42	4906.65	10886	7303.97	6264.35	8717.21	13763.5	12324.6	18548.7	7187.82	23857.8	11887.4	8255.64	11749.6	14303.1	18399
CACNG5	0	0	0	0	0	0	0	0	0	0	0	0	0	0	0	0	0	0	0	0	0	0	0	0	0	0
CACNG4	0	0.817947	1.72926	0	0	0	0	0	0	0	2.6141	0.837885	0.872347	2.88163	0	0	1.04921	1.07087	1.08682	0.889141	0	0.900218	0	0	0	0
FRYL	2567.98	2072.68	2585.24	3002.55	3101.52	2633.36	3278.03	3096.9	3666.91	3213.3	3312.93	3534.2	3505.09	3582.82	3208.3	3218.37	3120.35	2741.43	3076.78	3640.14	3066.88	3647.68	3752.56	2332.73	3752.02	3353.99
TMEM131	2672.61	2614.16	2999.4	2784.38	3236.26	3176.21	2969.65	3701.53	3831.68	2609.24	3136.92	3345.67	3364.64	3437.78	3553.4	3214.19	4421.37	3080.89	3572.36	3629.47	3523.13	3476.64	2526.86	2805.75	2735.66	2739.47
FSCN1	123.879	162.771	114.131	91.3857	308.84	266.874	150.146	202.123	212.546	260.463	181.244	289.908	302.704	179.622	189.158	193.437	148.988	605.042	211.929	232.066	264.95	253.862	90.0086	166.225	161.344	155.207
ACTB	103271	110684	125745	98038.7	151481	135125	114394	145797	116815	127556	135575	144813	168403	141353	139233	98206.4	182337	158670	149763	143218	173536	125313	57984.1	140281	123002	98069.4
MOCOS	6.69618	5.72563	7.78166	13.1727	7.15459	2.02177	3.59631	8.67479	4.87492	1.84725	1.74273	3.35154	4.36173	2.88163	11.0726	4.18242	11.5413	4.28348	8.69453	8.89141	4.0919	5.40131	2.64731	15.6185	4.11068	3.78554
PLD1	82.0282	109.605	211.834	172.069	296.916	180.949	103.394	295.81	270.07	146.857	79.2943	165.901	162.256	102.778	154.094	74.238	508.866	245.229	185.846	144.041	242.445	179.143	60.8882	211.965	120.237	280.13
ATP12A	0	0.817947	0	0	0	1.01089	0	0	0	2.77088	1.74273	0	0	0.960543	0	1.04561	0	0	0	0.889141	0	0.900218	0	0	0	0
WDR62	128.064	82.6127	79.5459	88.9158	102.549	114.23	140.256	96.2901	64.3489	125.613	167.302	182.659	183.193	322.742	167.935	196.574	138.496	58.8979	179.325	127.147	146.285	168.341	120.453	99.2889	157.233	98.4239
DLG1	1685.76	1595	1622.04	1523.92	2158.3	1803.42	2110.13	1885.9	1769.59	2052.3	2039.87	1711.8	2015.99	1965.27	2043.83	2049.39	1635.72	1879.38	1839.98	1661.81	1856.7	2045.3	1925.92	1707.99	1821.03	1830.94
RAB7A	5326.81	5275.76	5970.26	5304.49	6858.87	6283.67	5234.42	7050.87	6009.8	5348.72	5634.25	6634.37	6286.13	5675.85	6146.24	5049.23	10502.6	7295.84	7058.87	6283.56	7506.59	6295.23	4275.41	7863.9	6154.72	6445.51
BCAP29	898.125	820.401	920.83	831.527	1174.55	958.321	832.545	1008.01	923.309	841.424	711.035	891.509	858.389	827.988	920.875	994.371	1250.66	826.712	1124.85	915.815	1097.65	847.105	923.912	1113.37	1001.98	928.718
SEC31B	2309.34	2096.4	2082.89	2292.88	1662.25	2389.74	2227.91	1760.98	2041.61	2291.52	1638.17	1906.19	2195.7	1570.49	1615.68	2314.97	1409.09	1818.34	1922.58	1814.74	1445.46	1865.25	1865.03	1381.12	1573.36	1704.75
SART3	1494.08	1532.83	1745.69	1577.43	1209.13	1188.8	1136.43	1066.13	1132.93	1108.35	1212.94	1281.13	1001.45	1420.64	1426.53	1224.4	1230.72	1169.39	1280.27	1437.74	883.85	1128.87	1567.21	1102.22	1309.25	1282.03
ARHGAP15	2341.99	2026.87	1944.55	2175.97	2060.52	2547.44	2827.6	2046.38	1920.72	2201	2580.99	2604.15	2017.74	2204.45	2503.34	2770.86	1710.21	2285.24	1916.06	2363.34	1907.85	2438.69	3722.12	2126.34	3203.25	2362.17
TUBA3D	23.4366	15.541	21.6157	28.8153	31.0032	35.381	44.0547	38.1691	45.8242	59.1121	36.5974	58.6519	37.5109	49.9482	34.1406	36.5962	25.181	47.1183	22.8231	31.1199	34.7811	44.1107	22.5021	16.7341	5.13835	15.1421
PAX2	0.837022	0.817947	0	0.823294	0	0	0	0	0.974983	0	3.48546	0.837885	0	3.84217	0	0	0	2.14174	0	1.77828	0	0	0	0	1.02767	0
EXOSC7	488.821	437.602	383.895	405.884	268.297	270.918	287.704	255.039	281.77	356.52	352.032	265.609	325.385	330.427	270.357	281.268	254.958	257.009	270.617	253.405	299.732	277.267	431.512	436.202	438.815	387.387
KIFAP3	435.252	322.271	408.97	368.013	332.689	271.929	344.346	311.425	318.819	299.255	407.799	480.108	274.789	447.613	435.524	354.46	463.75	258.08	408.643	432.123	401.006	369.089	475.192	319.063	453.202	355.84
MKRN2	954.205	870.296	1020.26	902.331	1032.65	1162.52	894.581	991.528	866.76	771.228	838.254	1023.06	876.708	1015.29	1014.07	897.13	1097.47	947.72	977.048	937.155	896.126	918.223	893.467	953.843	770.752	773.511
MCM6	854.6	620.004	695.162	642.17	728.576	641.913	991.681	561.259	432.893	629.913	933.233	958.54	842.687	1431.21	861.821	821.846	654.706	451.907	669.479	869.58	573.889	847.105	775.662	671.595	1135.58	1015.79
REXO2	500.539	527.576	455.66	470.101	263.528	349.767	635.647	267.183	313.945	367.603	386.886	408.05	369.003	419.757	380.161	439.154	263.351	326.615	323.871	386.776	196.411	335.781	522.844	467.439	533.361	352.055
RBM7	696.402	441.691	364.873	409.177	790.583	539.814	744.435	654.079	555.74	899.612	660.495	488.487	812.155	554.233	597.923	828.12	803.694	742.113	736.861	513.035	818.38	1090.16	1134.37	900.294	802.61	1048.59
RBMS2	188.33	146.413	325.101	206.647	410.197	392.224	391.997	313.16	396.818	399.93	171.659	436.538	473.684	300.65	370.934	264.538	474.242	470.112	429.292	360.102	707.899	516.725	138.984	358.109	247.668	309.152
BAZ2A	7383.37	6813.5	7485.96	8200.01	9477.45	9070.69	10076.8	9838.08	10322.1	9727.63	9896.1	9706.06	10442	9880.14	9575.99	11112.7	10731.3	9388.32	9543.33	9819.68	10931.5	10776.5	9351.63	7215.74	7793.85	8184.33
PTPN23	2041.5	1833.84	1976.54	1861.47	2025.94	1968.2	2155.09	2240.7	2123.51	1924.84	2032.03	2119.85	1895.61	2190.04	2111.18	2162.31	2287.28	1956.48	2214.93	2250.42	2168.71	2131.72	1452.05	1674.52	1470.6	1706.02
MLH1	727.372	786.047	805.834	803.535	654.645	729.86	728.252	649.742	671.763	727.818	735.433	779.233	749.346	907.713	929.179	768.52	855.105	708.916	906.405	739.766	729.381	807.496	933.177	942.687	1051.31	853.008
UNG	324.765	309.184	345.852	323.555	234.909	441.758	280.512	254.171	178.422	169.947	363.36	329.289	253.853	434.165	346.943	293.815	300.074	234.521	249.968	328.982	196.411	285.369	246.2	222.006	271.305	182.968
FMO4	126.39	84.2486	104.62	109.498	51.2746	139.502	99.7975	156.146	152.097	110.835	109.792	141.603	129.98	94.1332	119.031	130.701	128.003	121.008	79.3376	161.824	105.366	104.425	120.453	89.2485	92.4903	68.1397
KLHL20	674.64	632.273	600.917	587.832	686.841	721.773	800.178	624.585	671.763	797.09	675.309	655.226	692.643	660.853	600.691	745.517	586.508	642.522	755.337	633.069	587.188	751.682	839.198	554.456	714.231	839.127
RGS11	5.85916	2.45384	0	0.823294	0	3.03266	0.899076	2.60244	2.92495	0.923626	2.6141	0	1.74469	0.960543	1.84544	4.18242	1.04921	1.07087	2.17363	2.66742	0	2.70065	0	1.11561	1.02767	2.52369
SLC46A1	61.1026	62.164	74.3581	71.6266	58.4292	72.7839	41.3575	58.1211	61.4239	83.1264	33.1119	44.4079	75.8941	48.0271	59.9768	60.6451	43.0176	41.7639	53.254	36.4548	46.0339	54.0131	39.7097	73.63	51.3835	45.4264
PLXNA2	87.8873	91.6101	213.563	191.828	230.139	155.677	169.925	200.388	204.746	183.802	117.634	176.794	180.576	140.239	145.79	136.974	326.304	270.93	421.685	257.851	374.409	225.055	74.1247	193	179.842	193.062
SPAG5	46.8732	40.8974	34.5852	27.1687	48.8897	55.5988	56.6418	33.8317	37.0494	56.3412	81.037	73.7338	81.1282	206.517	78.4312	99.3325	46.1652	38.5513	55.4276	72.0204	58.3096	97.2236	68.8301	65.8207	81.1859	73.187
ANKRD13A	3714.7	4056.2	3962.6	3931.23	4981.98	5224.26	4632.94	4793.69	4279.2	4779.77	4862.22	4703.05	4929.63	4379.11	4944.86	4774.24	5892.36	5093.06	5535.15	4521.28	5826.86	4517.29	4684.42	4861.81	4429.26	4234.75
TPD52	978.479	918.555	817.939	959.138	1694.45	717.73	1427.73	1116.45	1253.83	923.626	2045.1	697.958	612.387	2154.5	2189.62	2180.09	880.286	773.168	1124.85	1323.93	948.298	1430.45	2859.1	844.514	1328.78	1057.43
ACACB	741.602	702.617	711.59	829.881	620.065	974.495	739.041	817.165	832.636	981.815	588.172	536.246	886.304	553.273	597	655.595	354.633	904.886	631.44	704.2	529.901	874.112	689.624	621.392	652.57	603.162
TRAF4	647.855	541.481	449.607	414.117	1355.8	549.922	1035.74	562.126	365.619	1037.23	811.242	510.272	609.77	462.021	988.233	1550.63	329.452	650.018	931.401	476.58	1161.08	1168.48	2033.13	729.606	550.831	591.806
PAG1	3265.22	2422.76	1711.1	2150.45	3599.95	3039.74	4707.56	2667.5	3043.9	4802.86	3720.73	3971.57	4236.11	3570.34	3909.57	4919.57	3515.9	3122.66	3518.02	4165.63	4628.96	4169.81	3865.07	2803.52	4891.71	3625.28
GPATCH1	395.074	409.792	443.555	386.125	282.606	486.237	369.52	386.895	369.519	411.937	435.683	396.319	338.47	414.955	453.056	380.6	378.764	430.49	353.215	378.774	209.71	374.491	319.001	335.797	309.329	272.559
ICAM3	6232.47	6613.92	8534.75	7216.18	8287.4	7276.36	5977.06	6083.63	4977.29	7571.89	7055.45	5884.46	6210.24	5868.92	7387.3	5368.14	6949.96	8160.03	5777.51	5864.78	7198.67	5258.17	5262.85	7974.35	6159.85	7338.89
NT5C2	2955.53	2459.57	3108.34	2783.56	2940.54	3255.06	3061.35	3459.5	3106.3	2691.45	2804.06	3748.7	3223.32	2976.72	2829.06	2914.1	5313.19	3489.97	3486.51	3420.53	3916.97	3601.77	2843.21	4200.26	3024.43	3562.19
MCAM	11.7183	20.4487	19.0218	23.8755	129.975	19.2069	26.0732	33.8317	27.2995	47.1049	27.8837	10.8925	15.7022	28.8163	56.2859	18.8209	31.4763	26.7718	11.955	15.1154	68.5393	27.9068	34.415	22.3121	22.6087	99.6858
GPC4	6.69618	13.0872	26.8035	13.996	10.7319	40.4355	13.4861	11.2772	15.5997	26.7852	16.556	15.9198	11.3405	6.7238	28.6043	58.5539	8.39367	13.9213	60.8617	22.2285	55.2406	26.1063	37.0624	31.237	14.3874	7.57107
MBNL3	2367.94	1891.91	1986.05	2222.07	2464.76	2079.39	3573.83	2826.25	2911.3	1931.3	2742.19	2254.75	2348.36	2627.08	2887.19	3195.37	2361.77	2314.15	2560.54	2879.93	3058.69	2575.52	2724.08	1835.17	2134.47	1916.74
CAMSAP3	14.2294	13.0872	6.91703	6.58636	8.34703	47.5117	33.2658	10.4097	17.5497	20.3198	31.3692	25.1365	20.064	65.3169	29.527	52.2803	6.29525	18.2048	21.7363	39.1222	18.4135	41.41	19.8548	17.8497	7.19369	11.3566
RAP1GAP	1.67404	6.54358	5.18777	4.93977	10.7319	7.07621	45.8529	37.3016	7.79987	21.2434	13.9419	20.1092	9.59581	10.566	11.9954	390.011	18.8858	8.56696	8.69453	2.66742	21.4825	9.00218	79.4193	15.6185	11.3044	3.78554
XAB2	2003.83	2014.6	2228.15	1818.66	2585.19	1881.26	2275.56	1919.73	1686.72	2340.47	1854.27	1815.7	1841.52	1856.73	1994	2221.91	1791	1917.93	2367.09	1892.98	1852.61	2356.77	2209.18	1870.87	1884.75	2338.2
ARHGEF1	28925	32123.2	27937.9	27158.8	28062.7	31302.1	28156.4	29511.6	27484.8	34572.3	28367.3	26496.4	28968	27888.4	28342.3	29550.9	27238.5	30060.4	27558.4	27719.9	24638.3	29357.9	22139.5	22269.7	20831.9	22847
STXBP2	2408.11	2654.24	3156.76	2617.25	4214.06	3255.06	2773.65	3536.71	3052.67	2912.19	2461.61	2882.32	2980.81	2313.95	2855.82	2447.76	4902.95	3185.84	4052.74	3137.78	5333.79	3256.09	1543.38	3634.64	2848.7	2955.24
MAP2K7	1489.9	1472.3	1372.17	1245.64	2375.33	2059.18	2013.03	1951.83	1737.42	2230.56	1700.03	1828.26	1815.35	1859.61	2202.53	2227.14	1838.21	2113.9	2229.06	1886.76	2264.87	2088.51	1444.11	1481.52	1218.82	1572.26
NMRK2	0.837022	0	0.864629	0	0	1.01089	0.899076	0	0	0.923626	0	0.837885	0	0.960543	0	1.04561	0	0	0	0	1.02297	0	0	1.11561	0	0
DGKD	7247.78	7244.56	6788.2	7044.93	7673.3	7568.51	6842.87	8634.01	9741.06	8162.09	7905.03	6279.11	6923.81	6599.89	7778.53	9275.57	7581.58	7707.05	6298.1	6480.95	6609.44	7587.94	8639.5	5043.65	5032.5	6584.31
CTTNBP2	0.837022	8.17947	10.3755	12.3494	7.15459	16.1742	0.899076	12.1447	23.3996	5.54176	1.74273	1.67577	11.3405	0	4.6136	2.09121	9.44288	22.4883	3.26045	5.33485	12.2757	1.80044	0	1.11561	3.08301	2.52369
ACTL6B	0	2.45384	0	1.64659	0	0	0.899076	0.867479	0	0	0.871366	3.35154	1.74469	1.92109	1.84544	0	0	0	0	0	0	1.80044	0	0	0	0
RARB	10.0443	15.541	12.1048	12.3494	9.53946	20.2177	14.3852	8.67479	7.79987	11.0835	11.3278	7.54096	7.85112	7.68434	5.53632	5.22803	6.29525	8.56696	3.26045	11.5588	13.2987	13.5033	6.61828	13.3873	11.3044	1.26185
TOP2B	6290.22	6058.53	6565.13	6332.78	4335.68	5374.89	5301.85	6043.72	6166.77	5113.2	6636.32	6151.75	5710.38	7077.28	6394.45	5782.2	6252.24	5331.86	5737.3	6476.5	4677.04	5392.31	5032.54	4890.82	5294.56	4112.35
TM9SF3	4201.85	3832.08	4414.8	4221.85	4094.81	3669.52	4188.8	4471.85	4308.45	3729.6	4189.53	4197.8	4255.31	5196.54	4311.87	3856.19	4653.24	4428.05	4171.2	4195.86	4362.99	3924.05	3793.6	4341.94	4851.63	4527.5
NFKB2	2612.35	2974.87	2768.54	2632.9	3944.57	3303.58	3756.34	2611.11	2443.31	3516.25	3976.91	3085.09	3749.35	2969.04	3853.28	4685.36	1928.45	3805.87	3719.08	3103.99	4194.2	4036.58	4334.97	3297.73	2924.75	2319.27
UBE2T	53.5694	35.1717	46.69	44.4579	15.5016	26.2831	44.0547	33.8317	30.2245	28.6324	45.311	70.3823	44.4897	99.8965	71.0495	64.8276	32.5255	22.4883	32.6045	58.6833	21.4825	19.8048	41.0333	56.8959	62.6879	50.4738
PPP1R12B	869.666	803.224	894.027	899.038	770.311	863.297	902.673	1090.42	1109.53	975.349	1135.39	1091.76	958.709	1183.39	882.121	929.543	1016.68	939.153	784.681	940.711	965.688	1127.97	808.753	873.519	808.776	798.748
DNAJC10	3687.92	3731.47	3911.58	3834.08	4376.23	3366.25	3338.27	4364.29	4205.1	3022.11	3810.48	3272.78	3460.6	4291.71	4607.14	4185.56	3241.01	4071.45	3681.05	3875.77	3664.3	3819.63	4066.27	4500.35	3923.64	3788.06
GTF3C1	2743.76	2228.09	2930.23	2544.8	4429.89	2573.72	2446.39	2792.41	2457.93	2500.26	2578.37	2549.68	2145.97	3325.4	2631.6	2527.23	3160.22	2517.62	2758.34	2863.03	2239.29	2507.11	1814.73	1677.87	2091.31	2667.54
IL4R	6624.19	6869.94	8167.29	7971.14	6009.86	8876.6	6767.35	11322.3	11955.2	7662.4	13116.7	6016.01	5033.44	4253.28	11534.9	11704.5	3910.4	6257.1	5146.07	6873.06	5146.59	8229.79	13714.4	6109.06	5171.24	3418.34
USP33	2707.77	2522.55	2645.77	2611.49	2743.79	2671.77	2777.25	2912.99	2922.02	2618.48	2541.77	2796.86	2820.3	2672.23	2551.32	2503.18	3414.13	2619.35	2810.51	2603.41	2725.2	2553.02	2843.21	2857.07	2527.04	2603.19
PAK3	2.51107	6.54358	9.51092	13.1727	9.53946	9.09798	15.2843	8.67479	7.79987	9.23626	12.1991	3.35154	3.48939	2.88163	5.53632	10.4561	0	10.7087	2.17363	5.33485	4.0919	5.40131	5.29462	2.23121	3.08301	8.83292
CAPN6	0.837022	0	0	0	0	0	0	0	0.974983	0.923626	0	0	0	0	0	1.04561	1.04921	3.21261	0	0	2.04595	0	1.32366	2.23121	1.02767	3.78554
DCX	0	0	0.864629	0	0	0	0	0	0	0	0	0	0	0	0	0	0	0	0	1.77828	0	0	0	1.11561	1.02767	1.26185
SNRPA	1176.85	1303.81	1114.51	1011.01	1385.61	1279.78	1362.1	1332.45	945.734	1427	1157.17	1373.29	1309.39	1317.86	1279.81	1386.47	1298.92	1371.79	1330.26	1158.55	1131.41	1315.22	1352.78	1337.61	1118.1	1131.88
SPAG6	0.837022	2.45384	3.45852	4.11647	0	4.04355	8.09169	1.73496	1.94997	3.69451	5.2282	46.0837	12.2129	10.566	11.0726	8.36485	13.6397	7.49609	8.69453	6.22399	5.11487	8.10196	9.26559	14.5029	5.13835	6.30923
EXOSC5	319.742	358.261	397.729	354.017	282.606	307.31	312.879	278.461	270.07	269.699	274.48	366.156	328.875	244.938	328.488	284.405	281.188	334.112	217.363	274.745	240.399	268.265	287.233	327.988	274.388	262.464
DYNC1I2	1400.34	1268.64	1786.32	1477.81	1160.24	1357.62	1036.64	1520.69	1276.25	951.335	1170.24	1585.28	1294.56	1294.81	1519.72	1094.75	1822.48	1322.53	1597.62	1775.62	1320.66	1172.08	1073.48	1439.13	1550.75	1284.56
APBB1IP	3430.12	3620.23	4155.41	3551.69	3322.12	3760.5	2993.03	4392.04	3660.09	3362	3838.37	4992.95	3494.62	3826.8	4204.84	3570.74	6083.31	3831.57	3693	4902.72	3370.7	3522.55	2627.46	3941.44	3284.43	2581.74
LRCH4	8113.26	8805.2	8073.91	7283.69	9593.12	11533.2	9316.23	10113.1	10322.1	11368.9	8850.46	8403.98	10432.4	8132.92	9503.1	9803.6	9258.22	10941.1	8859.72	9014.11	9465.59	9971.72	4937.23	7225.78	5624.44	6193.14
FAM76B	1552.68	1379.88	1379.95	1483.58	2148.76	1849.92	2039.11	1761.85	1645.77	2124.34	1713.98	1629.69	1697.59	1632.92	1572.32	2001.29	1508.76	1674.84	1891.06	1571.11	1816.8	1802.24	2109.91	1578.58	1650.44	1842.29
SIRT6	392.563	484.225	473.817	391.065	603.371	596.423	582.601	549.981	567.44	566.183	513.235	680.362	617.621	593.615	623.759	545.806	699.822	593.262	597.749	607.283	660.842	623.851	365.329	470.786	438.815	529.975
TYR	0	0	0	0	0	0	0	0	0	0	0	0	0	0	0	0	0	0	0	0	0	0	0	0	0	0
POLD3	590.938	539.845	671.817	620.764	429.276	638.881	453.134	643.669	553.79	380.534	508.878	633.441	568.77	541.746	585.005	421.379	862.45	606.113	601.009	545.044	624.015	495.12	422.246	648.167	560.08	548.903
ACTN2	0	0	0.864629	0	0	0	1.79815	0.867479	0	0	0.871366	0	1.74469	1.92109	0	2.09121	0	0	0	0	2.04595	1.80044	1.32366	1.11561	0	0
CAPZB	7263.68	7845.75	8014.25	7043.28	8286.21	7290.52	7414.68	7133.28	5999.07	6485.7	7743.83	7877.79	7494.33	7202.15	7585.68	6113.66	8223.7	7962.99	7828.34	7691.96	8823.16	7128.83	6043.81	8847.87	8198.75	6883.37
GPR137B	372.475	224.935	358.821	255.221	349.383	402.333	485.501	368.678	285.67	302.949	433.94	315.045	300.96	450.495	361.706	288.587	570.77	304.127	674.913	732.652	648.566	359.187	275.32	334.682	435.732	258.678
NAALAD2	94.5835	64.6178	49.2839	84.7993	48.8897	74.8056	100.697	83.2779	120.898	119.148	101.95	87.14	105.554	98.9359	49.8269	79.466	67.1494	64.2522	108.682	121.812	113.55	80.1194	84.7139	50.2023	62.6879	52.9975
JADE1	1939.38	1418.32	1517.42	1567.55	2238.2	1918.66	1774.78	1625.65	1583.37	1922.07	1876.05	1264.37	1722.01	1570.49	1647.98	1651.01	1719.65	1673.77	1603.05	1589.78	1576.4	1808.54	1906.06	1353.23	1426.41	1353.96
SLC25A43	298.817	313.274	325.101	301.326	478.165	356.843	265.228	422.462	407.543	310.338	327.634	353.587	381.215	323.703	394.002	246.763	498.374	383.372	377.125	353.878	407.144	356.486	240.905	311.254	358.657	256.155
UBE2A	1444.7	1320.98	1405.02	1370.79	1823.23	1486	1422.34	1577.94	1366.93	1327.25	1379.37	1844.18	1545.8	1520.54	1491.12	1501.49	1862.35	1391.06	1757.38	1520.43	1863.86	1526.77	1385.87	1783.85	1698.74	1520.52
FGFR1	351.549	267.469	626.856	151.486	256.373	314.386	443.245	576.873	467.992	323.269	692.736	190.2	326.258	511.969	448.442	359.688	488.931	369.45	386.907	495.252	216.871	397.896	266.055	186.306	454.23	252.369
FKBP6	0.837022	2.45384	2.59389	1.64659	3.5773	2.02177	6.29353	0	1.94997	1.84725	3.48546	0.837885	1.74469	4.80271	0	1.04561	2.09842	3.21261	1.08682	2.66742	3.06892	0.900218	1.32366	3.34682	1.02767	0
GTF2I	4625.38	4389.1	4988.91	4957.88	3898.06	4522.71	4226.56	5384.44	5984.45	4885.98	4684.46	5173.1	4454.2	5446.28	5270.58	5002.18	4837.9	4950.63	4113.6	5022.76	5098.51	4869.28	3837.28	4311.82	3747.91	3883.96
SMC1B	7.5332	9.81537	6.0524	4.93977	16.6941	18.196	19.7797	17.3496	37.0494	29.556	26.141	25.1365	43.6173	28.8163	16.609	13.5929	25.181	21.4174	15.2154	28.4525	20.4595	23.4057	11.9129	13.3873	10.2767	13.8803
FBLN1	5.85916	0.817947	0	2.46988	0	14.1524	11.688	4.33739	1.94997	0.923626	18.2987	6.70308	0	16.3292	4.6136	4.18242	0	1.07087	3.26045	80.0227	7.16082	0.900218	6.61828	2.23121	5.13835	0
ITGA8	3.34809	0	4.32315	0	0	0	4.49538	0	0	0	2.6141	5.02731	0.872347	50.9088	9.2272	5.22803	0	0	9.78134	0.889141	3.06892	14.4035	2.64731	2.23121	4.11068	5.04738
CST7	2780.59	2375.32	3951.36	2282.17	5008.22	1965.16	3760.84	2489.66	1575.57	1592.33	2739.57	4256.45	1019.77	3966.08	1990.31	1636.37	5810.52	1626.65	4583.1	3618.8	2303.74	1756.33	1331.6	1255.06	1930.99	3140.73
MAP2	15.0664	15.541	22.4804	15.6426	32.1957	14.1524	24.2751	35.5666	41.9243	6.46538	74.9375	43.57	17.4469	25.9347	71.0495	52.2803	11.5413	18.2048	61.9485	75.577	19.4365	53.1129	64.8591	12.2717	46.2451	25.2369
PIAS2	508.072	494.858	399.459	564.78	707.112	634.837	547.537	721.742	853.11	701.032	684.022	597.412	627.217	669.498	629.295	639.911	668.346	537.577	636.874	597.503	599.463	625.652	544.022	455.167	439.843	410.1
AMPH	11.7183	19.6307	33.7205	23.0522	28.6184	20.2177	32.3667	52.0487	61.4239	12.9308	14.8132	81.2748	27.0427	40.3428	18.4544	29.277	290.631	12.8504	34.7781	33.7874	15.3446	24.3059	15.8839	29.0057	16.4427	30.2843
ARAF	2624.9	2654.24	2835.98	2440.24	3772.86	3324.81	3464.14	2857.47	2786.5	3245.62	2703.85	3107.71	3170.11	3086.22	3400.22	3075.13	3314.45	3105.52	3563.67	2968.84	3704.19	3491.05	2371.99	2878.26	2543.48	2286.46
MCCC1	564.99	632.273	458.253	544.198	440.008	554.977	499.886	511.812	599.615	525.543	457.467	527.029	530.387	555.194	548.096	497.708	423.88	488.317	479.286	481.915	420.443	508.623	502.989	630.317	552.886	474.454
LAMP3	137.272	84.2486	83.869	107.028	71.5459	77.8383	497.189	169.158	152.097	48.0286	215.227	499.379	225.938	230.53	589.618	978.687	445.914	76.0318	310.829	460.575	171.86	586.042	1638.69	775.346	968.065	422.718
FAP	1.67404	0.817947	0	0	2.38486	1.01089	0	0	0	0	0.871366	10.0546	0.872347	0.960543	1.84544	3.13682	6.29525	2.14174	1.08682	2.66742	1.02297	4.50109	11.9129	3.34682	2.05534	0
NEBL	233.529	4.08974	4.32315	8.23294	5.96216	370.996	302.09	2.60244	3.89993	5.54176	68.8379	78.7612	421.343	8.64489	275.893	192.391	0	9.63783	214.103	2.66742	584.119	273.666	60.8882	8.92485	535.416	6.30923
ACER3	762.527	797.498	777.302	864.459	1754.07	1138.26	816.361	1567.53	1661.37	899.612	781.615	991.218	1442.86	870.252	860.898	703.693	1805.69	1070.87	984.655	1086.53	1565.15	1038.85	416.951	1028.59	990.674	1057.43
UBE2K	2084.19	1932.81	1948.01	2105.16	2353.86	2060.19	2396.94	2234.62	2195.66	2043.06	2402.36	2311.72	2312.59	2396.55	2230.21	2245.96	2506.56	2137.46	2435.55	2270.87	2455.14	2221.74	2632.75	2435.37	2852.81	2302.87
PIK3C3	1674.88	1531.2	1594.38	1643.3	1201.97	1621.46	1719.93	1700.26	1826.14	1666.22	1619.87	1733.58	1712.42	1702.08	1510.49	1716.88	1704.96	1628.79	1632.4	1612.01	1564.13	1759.93	1646.63	1541.77	1561.03	1729.99
N4BP2	1401.18	1033.89	844.743	1103.21	1361.76	1274.73	1763.99	1475.58	1959.72	1853.72	1429.04	1521.6	1893.86	1476.35	1540.02	1744.07	1332.5	1376.07	1393.3	1366.61	1182.56	1305.32	1719.43	1214.89	1491.15	1587.4
C12orf5	318.068	229.843	269.764	240.402	647.491	304.277	276.016	300.148	194.022	312.186	249.211	389.616	375.981	302.571	268.512	296.952	488.931	318.049	431.466	296.973	502.281	345.684	360.034	483.057	450.119	435.337
TULP3	235.203	221.664	253.336	249.458	200.329	244.635	270.622	216.002	220.346	223.518	256.182	253.879	211.108	225.728	263.898	227.942	250.761	259.151	193.453	291.638	186.181	233.157	198.548	196.347	203.479	162.778
SYNJ2	1204.47	914.465	798.917	995.363	432.853	978.539	831.646	1042.71	974.008	1082.49	995.1	1076.68	840.07	838.554	1171.85	1182.58	1463.65	893.106	899.884	1111.43	822.472	1127.97	982.152	744.109	846.8	834.08
ADCY2	4.18511	1.63589	6.0524	0.823294	0	0	0	1.73496	0	2.77088	1.74273	0	0	0	0.92272	0	0	3.21261	3.26045	0	2.04595	0	3.97097	2.23121	3.08301	7.57107
PPP2R5C	6922.17	6591.84	7546.48	6514.73	9442.87	6451.48	9721.71	7351.01	6600.64	7103.61	8593.41	7473.09	6725.79	8849.48	7534.93	7308.78	8083.1	7521.79	8811.9	8199.66	7450.33	6502.28	7820.16	5901.55	7610.92	9457.53
PMS2P1	210.93	211.848	182.437	167.952	176.48	155.677	227.466	166.556	166.722	218.899	197.8	175.118	183.193	180.582	201.153	184.027	146.889	168.127	177.151	151.154	136.056	180.944	273.997	186.306	175.732	185.491
RBFOX1	0	0	0	0	0	0	0	0	0	0	0	0	0	0	0	0	0	0	0	0	0	0	0	0	0	0
GNB1	10962.5	11557.6	12366.8	11647.1	14875.6	12378.3	12029.6	12925.4	10858.4	11478.8	11302.5	13053.4	11972.1	11296	12062.7	10903.6	14655.3	13021.8	14342.7	12459.5	15080.7	11949.5	11305.3	15425.5	13687.5	13625.4
HOXA9	4.18511	14.723	17.2926	13.1727	21.4638	13.1415	4.49538	19.0845	10.7248	9.23626	1.74273	5.02731	8.72347	2.88163	10.1499	8.36485	32.5255	16.0631	16.3022	7.11313	12.2757	7.20175	0	16.7341	5.13835	12.6185
EDN1	33.4809	21.2666	14.6987	30.4619	33.3881	21.2286	43.1557	44.2414	44.8492	61.883	109.792	27.6502	64.5536	68.1985	19.3771	80.5116	50.362	47.1183	44.5595	74.6879	25.5744	44.1107	124.424	53.5491	39.0515	31.5461
MLLT10	1984.58	1687.42	1649.71	1691.87	2359.82	2047.05	2527.3	1869.42	1999.69	2184.38	1957.09	2013.44	2232.33	1865.37	2024.45	2153.95	2067.99	2264.89	2162.76	2114.38	2209.63	2405.38	2248.89	2233.44	2531.15	2249.87
ZCWPW1	210.093	200.397	182.437	188.534	238.486	262.831	230.164	263.714	340.269	274.317	290.165	222.877	362.896	176.74	202.998	257.219	241.318	266.647	249.968	258.74	435.787	277.267	244.876	211.965	191.147	147.636
ADCYAP1R1	0	0.817947	0	0	0	0	0	0	0	0	0	0	0	0.960543	0	0	0	0	0	0	0	0	0	0	2.05534	0
FGF20	0	0.817947	0	0	0	0	0.899076	0	0	0.923626	0	0	0.872347	0	0	2.09121	1.04921	0	0	0.889141	0	0	0	0	0	0
P2RY10	732.394	710.796	716.778	685.804	986.141	701.556	1207.46	687.043	807.286	1066.79	1903.93	619.197	638.558	1094.06	1659.05	1814.13	250.761	927.374	1220.49	1344.38	748.818	1064.96	2574.51	533.26	1323.64	762.155
ITM2A	2217.27	2271.44	2605.99	1554.38	1247.28	1093.78	2394.24	1577.08	1460.52	2125.26	3754.72	2436.57	1089.56	1889.39	2698.96	2550.23	992.552	1926.5	2595.32	2116.16	1549.81	1737.42	3412.38	1084.37	3504.35	2130
NRD1	4055.37	3938.42	4280.78	4149.4	4702.95	4154.75	4538.54	4564.67	4256.78	4051.03	4218.28	4889.89	4665.31	5424.19	4131.94	4422.91	5951.11	5340.43	4921.1	4493.72	5004.39	4585.71	4507.05	5772.14	5343.88	5453.7
VDAC3	1631.36	1878.01	1860.68	1799.72	1472.65	1746.81	1556.3	1596.16	1395.2	1519.37	1561.49	1995	1604.25	2021.94	1594.46	1498.35	1603.19	1482.08	1695.43	1666.25	1722.69	1468.26	1553.97	1899.88	1936.13	1841.03
PCM1	3236.76	3296.33	4023.12	3642.25	3205.26	3764.54	3803.09	3888.91	3907.73	3396.17	3664.09	4040.28	3957.84	4140.9	4464.12	3397.17	3663.84	3200.83	3364.78	4307.89	3022.89	3664.79	3287.96	3104.73	3186.8	3102.88
TNRC6C	1534.26	1099.32	1124.88	1253.05	1680.14	1590.13	2150.59	1605.7	2014.32	2239.79	1904.81	1314.64	1904.33	1758.75	1634.14	1968.88	1143.64	1869.74	1370.48	1855.64	1136.52	1848.15	1433.52	722.913	1176.68	1163.42
CBFA2T2	1535.94	1421.59	1602.16	1532.15	1444.04	1646.73	1740.61	1610.04	1786.17	1633.89	1810.7	1509.87	1513.52	1543.59	1791	1808.9	1177.21	1613.8	1567.19	1860.08	1438.3	1781.53	1587.06	1249.48	1404.82	1444.81
BRINP1	0	0	0	0	0	0	0	0	0	0	0	0	0	0	0	0	0	0	0	0	0	0	0	0	0	0
ITCH	2621.55	2373.68	2923.31	2349.68	3424.67	2801.17	2736.79	2937.28	2844.03	2570.45	2729.12	2871.43	2537.66	3832.57	2985	2835.68	3940.83	2725.37	3236.54	3050.64	2716	2635.84	2806.15	2323.81	2441.74	2974.17
PKD2L2	15.0664	9.81537	12.1048	10.7028	26.2335	15.1633	46.752	44.2414	93.5984	47.1049	36.5974	32.6775	34.0215	43.2244	19.3771	33.4594	14.6889	20.3465	31.5177	35.5657	39.896	52.2127	17.2075	7.80924	8.22136	13.8803
TP53INP2	327.276	260.107	213.563	198.414	2402.75	494.324	879.297	548.247	350.994	1461.18	973.316	477.594	1346.03	680.064	635.754	922.224	948.485	983.059	1177.02	541.487	1699.16	949.73	763.749	822.201	811.859	787.392
SDF4	3112.89	2985.51	3491.37	2916.93	4981.98	4378.15	4371.31	4013.82	3550.89	3861.68	3491.56	4112.34	3660.37	4876.68	4308.18	3784.05	5611.17	4263.14	4532.02	4016.25	4790.59	4185.11	2329.63	3569.94	3094.31	3216.44
MYH7B	105.465	79.3409	85.5983	69.98	119.243	148.6	145.65	120.58	173.547	142.238	182.987	87.9779	115.15	96.0543	154.094	129.655	98.6256	130.646	104.334	144.93	90.0218	102.625	95.3032	62.4739	56.5218	61.8304
BPIFB2	0	0	0	0	0	0	0	0	0	1.84725	0	0	0	0	0	0	0	0	0	0	0	0	0	0	0	0
TP73	30.1328	13.0872	13.8341	6.58636	35.773	16.1742	44.0547	12.1447	23.3996	25.8615	60.9956	38.5427	34.8939	172.898	71.9722	125.473	23.0826	21.4174	45.6463	32.0091	20.4595	62.1151	23.8258	22.3121	48.3005	66.8778
TOLLIP	915.702	979.901	1181.95	927.03	1376.07	1387.95	1015.06	1431.34	1162.18	866.362	1106.63	1563.49	926.432	1080.61	1281.66	774.794	1811.98	1185.45	1212.89	1314.15	1443.42	914.622	559.906	1243.9	916.682	821.461
UBE2D4	63.6137	37.6256	50.1485	54.3374	79.893	71.773	72.8252	72.0007	68.2488	71.1192	63.6097	60.3277	75.8941	69.1591	68.2813	70.0556	44.0668	71.7483	63.0353	70.2422	85.9299	74.7181	56.9172	52.4335	58.5772	69.4015
CLUL1	0	1.63589	2.59389	3.29318	0	2.02177	0	0	0.974983	2.77088	0	1.67577	0	0	0	0	0	0	1.08682	0	0	0	0	0	1.02767	3.78554
RUNX1T1	0	0	0	1.64659	1.19243	2.02177	0	0	0	1.84725	0	0	0	0.960543	0	0	1.04921	0	0	0	0	0	0	1.11561	0	0
CDH17	8.37022	2.45384	0.864629	3.29318	0	2.02177	0.899076	2.60244	0.974983	3.69451	1.74273	0	3.48939	0	0	2.09121	1.04921	1.07087	0	0	1.02297	1.80044	0	0	0	1.26185
THOC1	834.511	876.839	784.219	923.736	881.207	1032.12	947.626	915.19	1150.48	1016.91	882.694	760.799	1067.75	953.819	840.598	969.276	661.002	836.35	778.16	869.58	961.596	907.42	814.048	697.254	783.084	733.132
FKBP7	36.829	16.3589	30.262	24.6988	39.3503	39.4246	17.0825	30.3618	24.3746	20.3198	22.6555	26.8123	33.1492	37.4612	23.9907	33.4594	22.0334	16.0631	31.5177	26.6742	14.3216	27.9068	21.1785	18.9653	29.8024	30.2843
OSBPL6	0.837022	2.45384	4.32315	4.11647	5.96216	0	9.88984	14.7471	10.7248	9.23626	5.2282	1.67577	13.9575	1.92109	5.53632	9.41045	2.09842	10.7087	9.78134	2.66742	5.11487	7.20175	7.94193	5.57803	5.13835	0
SLC1A3	8.37022	17.1769	21.6157	13.996	44.12	24.2613	22.4769	111.037	86.7735	18.4725	17.4273	51.111	47.9791	18.2503	15.6862	14.6385	328.402	18.2048	8.69453	23.1177	22.5054	23.4057	10.5892	44.6242	28.7748	122.399
XRCC5	9018.91	8389.68	8727.57	8273.29	7195.14	7990.05	7827.36	7839.4	7335.77	6881.94	8575.11	8252.33	7963.65	9315.34	9062.96	8055.35	8907.78	8149.32	8042.44	8510.86	7645.71	8182.08	7998.85	9368.86	9736.14	7843.63
LXN	134.761	108.787	108.079	93.8556	70.3535	106.143	78.2196	58.9885	64.3489	94.2099	125.477	161.712	114.277	140.239	143.944	122.336	147.938	152.064	107.595	110.254	136.056	109.827	105.892	145.029	103.795	74.4489
SP140	1242.14	1450.22	1549.42	1207.77	902.671	1153.42	1595.86	1235.29	1128.06	878.369	1570.2	1906.19	1006.69	1996.97	1863.89	1807.85	1692.37	851.342	1471.55	1453.75	977.964	1425.05	1981.51	1490.45	1634	1144.49
MKNK1	1131.65	1339.8	1615.99	1337.85	1765.99	1655.83	1516.74	2366.48	2187.86	1725.33	1410.74	2161.74	1612.97	1387.98	1485.58	1369.74	2432.07	1811.91	1694.35	1452.86	1876.14	1568.18	1144.96	1866.41	1518.9	1899.08
TNS1	74.495	102.243	168.603	184.418	180.057	197.123	892.783	321.835	166.722	153.322	264.895	397.995	318.406	139.279	260.207	837.53	522.506	170.268	379.299	270.299	514.556	443.808	226.345	165.11	220.949	205.681
REXO1	1415.4	1458.4	1274.46	1191.31	3369.81	2606.07	2956.16	2308.36	2367.26	3037.81	2858.95	2397.19	2709.51	2471.48	2714.64	3024.94	2602.04	2539.03	3040.91	2722.55	2874.56	2879.8	1371.31	1358.81	1357.55	1465
SAR1A	2137.75	1671.88	1954.06	1853.24	3305.42	2279.55	3210.6	2367.35	2377.98	3071.98	2653.31	2454.16	3246	2699.13	2353.86	2732.17	3443.5	2381.62	2963.75	2536.72	3221.35	2724.96	2855.12	2222.29	2247.51	2866.91
CDC14A	1672.37	1952.44	1371.3	1315.62	1632.44	1903.5	2815.91	1525.89	1655.52	2113.26	1616.38	2010.09	1708.93	1669.42	1819.6	2074.48	1038.72	1893.3	1426.99	1796.95	1599.93	1960.68	2555.98	1364.39	2701.74	2100.97
RAPGEF3	30.9698	38.4435	27.6681	74.9198	27.4259	60.6532	69.2289	45.9764	46.7992	30.4797	28.7551	61.1656	49.7238	39.3823	57.2087	44.961	62.9525	41.7639	31.5177	46.2353	45.0109	69.3168	38.386	43.5086	16.4427	54.2594
CEACAM1	146.479	80.9768	63.9826	112.791	44.12	137.481	425.263	157.881	101.398	171.794	231.783	451.62	250.363	189.227	269.434	457.975	664.149	237.733	143.46	258.74	198.457	293.471	460.632	313.485	192.174	58.0449
SENP1	712.306	580.742	560.28	575.483	736.923	638.881	827.15	671.428	723.437	839.576	772.03	776.719	799.942	817.422	705.881	809.299	739.692	653.231	794.463	739.766	698.692	818.298	782.28	724.028	809.804	781.082
DUSP13	0	1.63589	0	0	0	0	0	0	0	0.923626	2.6141	0.837885	1.74469	0	2.76816	2.09121	6.29525	4.28348	0	0	0	0.900218	2.64731	2.23121	1.02767	2.52369
CIC	4318.2	4898.69	4591.18	4481.19	7425.28	6716.33	6592.03	6485.27	5613.95	7161.8	6820.18	6357.03	7057.28	6166.69	6505.18	6815.26	5804.22	7154.49	6921.93	6555.64	7249.82	7135.13	3547.4	4592.95	4028.47	3934.43
LIPE	238.551	190.582	200.594	169.599	131.168	280.016	226.567	224.677	226.196	212.434	304.107	188.524	198.023	221.885	288.811	302.18	147.938	250.584	167.37	216.95	111.504	278.167	225.021	149.491	147.984	107.257
FDFT1	2033.13	2424.4	2183.19	2220.43	2392.02	1834.76	1579.68	1695.05	1447.85	1494.43	2133.98	2515.33	1626.05	1728.02	2094.57	1782.76	2023.92	1708.04	2047.56	2056.58	1922.17	2026.39	2169.47	2531.31	2449.97	1987.41
PAFAH1B3	149.827	193.036	162.55	151.486	129.975	127.372	177.118	128.387	88.7235	183.802	155.975	134.062	118.639	187.306	141.176	172.525	65.0509	114.583	151.067	125.369	102.297	143.135	199.872	151.722	156.206	153.945
OPHN1	216.789	151.32	183.301	232.169	367.269	328.538	383.007	381.691	682.488	550.481	441.783	464.188	385.577	417.836	191.926	189.255	323.156	275.214	316.263	475.691	535.016	418.601	168.104	184.075	190.119	254.893
AFM	0	0	0	0	0	0	0	0	0	0	0	0	0	0	0	0	0	0	0	0	0	0	0	0	0	0
KIF22	1534.26	1733.23	1557.2	1396.31	1591.9	1468.82	1861.09	1230.95	1215.8	1957.16	1783.69	1722.69	1597.27	2150.66	1678.43	1897.77	1047.11	1560.26	1637.83	1485.76	1470.01	1523.17	1621.48	1168.04	1696.68	1283.3
SCGN	0	0	0	0	0	0	0	0	0	0	0	0	0	0	0	0	0	0	0	0	0	0	0	0	0	0
LRRC16A	234.366	206.941	185.031	219.82	97.7794	245.646	121.375	297.545	333.444	205.969	220.456	187.686	316.662	368.848	388.465	282.314	134.299	185.261	197.801	193.833	152.423	245.76	256.789	132.757	117.154	98.4239
PGM1	534.02	683.804	778.166	693.214	728.576	510.498	570.014	601.163	543.066	467.355	550.703	533.733	500.727	374.612	465.974	548.943	756.48	572.916	679.26	461.464	411.236	552.734	550.641	687.213	572.412	796.224
DDX1	1648.1	1485.39	1608.21	1500.04	1161.43	1259.57	1119.35	1204.06	1123.18	1071.41	1274.81	1364.91	1148.01	1677.11	1370.24	1202.45	1344.04	1161.89	1290.05	1333.71	1033.2	1094.67	1485.14	1424.63	1566.17	1287.08
DNM2	7651.22	7938.18	8165.56	6930.49	10517.3	9039.35	8504.36	8815.32	7839.84	8679.32	7681.09	8728.24	8220.99	10115.5	9619.36	8714.08	10593.9	8736.16	9020.57	8337.48	8966.37	9078.7	6476.65	8441.79	7199.86	8344.58
EPB41L2	746.624	719.793	747.04	711.326	577.137	537.792	601.482	739.959	781.936	486.751	551.575	414.753	907.24	441.85	629.295	749.699	465.849	590.05	633.614	649.962	607.647	653.558	749.189	895.831	552.886	463.097
RIMS1	1.67404	0	0.864629	0.823294	0	0	0	0	0	0	0	0	0	0	0	0	0	0	0	0	0	0	1.32366	0	0	0
MOXD1	28.4588	36.8076	27.6681	17.2892	42.9276	27.2939	80.0178	30.3618	58.499	15.7016	108.921	73.7338	18.3193	365.967	93.1947	104.561	13.6397	24.63	179.325	179.607	26.5973	90.922	111.187	66.9363	137.708	102.209
STX7	1717.57	1948.35	2209.13	2148.8	1351.03	2531.26	1247.92	2576.41	2591.51	1141.6	2011.98	2598.28	1304.16	1772.2	2654.67	1878.95	3359.57	1793.71	2218.19	2714.55	2316.01	1708.61	1962.98	2214.48	1555.89	1545.76
RABL2B	1005.26	990.534	826.585	1171.55	912.211	1097.82	1170.6	990.661	1086.13	1171.16	1009.04	1373.29	1303.29	907.713	1107.26	1222.31	969.469	1380.35	1000.96	1210.12	948.298	1309.82	1062.9	708.41	782.057	707.895
KEAP1	542.39	622.458	922.559	662.752	734.538	826.906	554.73	630.657	462.142	436.875	542.861	1045.68	483.28	884.66	792.617	538.487	935.894	594.333	643.395	870.469	600.486	568.938	309.735	560.034	515.89	468.145
DDX43	30.9698	52.3486	25.0742	12.3494	45.3124	14.1524	47.651	40.7715	30.2245	29.556	37.4687	57.814	37.5109	57.6326	11.0726	16.7297	35.6731	41.7639	42.3858	24.0068	16.3676	19.8048	6.61828	40.1618	20.5534	22.7132
PTPRH	5.85916	5.72563	7.78166	2.46988	2.38486	6.06532	3.59631	7.80731	1.94997	4.61813	2.6141	24.2987	4.36173	4.80271	6.45904	14.6385	11.5413	4.28348	10.8682	22.2285	9.20677	16.2039	5.29462	13.3873	30.8301	1.26185
DCT	21.7626	7.36152	9.51092	8.23294	9.53946	11.1198	13.4861	10.4097	7.79987	12.0071	16.556	4.18942	9.59581	9.60543	6.45904	6.27363	7.34446	12.8504	3.26045	2.66742	6.13785	8.10196	7.94193	4.46242	9.24903	5.04738
SLC35C2	1982.07	2150.38	2008.53	1906.75	1776.72	2178.46	2033.71	1885.03	1904.14	2110.49	1929.2	1877.7	1988.95	2185.23	2151.78	2072.39	1974.61	2188.86	1806.29	1868.97	1710.41	2082.2	1820.03	1654.44	1600.08	1642.92
CRYBG3	212.604	309.184	325.965	360.603	336.266	341.68	290.402	399.908	567.44	329.735	344.19	399.671	501.599	272.794	296.193	278.131	372.469	432.632	313.003	340.541	513.533	359.187	222.374	300.098	411.068	388.648
EPHA6	0.837022	0	0	0	0	0	0	0	0	0	0	0	0	0	0	1.04561	1.04921	0	0	0	0	0	0	0	0	0
SCTR	0	0	0	0	0	0	0	1.73496	0	2.77088	0	0	0	0	0.92272	0	0	0	0	0	0	0	0	0	0	1.26185
RFX3	457.851	394.251	393.406	502.21	641.529	476.128	701.28	594.223	821.911	876.521	773.773	519.488	789.474	639.722	581.314	749.699	453.258	612.538	722.733	640.182	646.52	678.764	738.6	404.965	548.776	634.708
RIF1	1624.66	1487.03	1604.75	1786.55	1899.54	1591.14	2144.3	2059.39	2559.33	2142.81	2051.2	2291.61	2358.83	2170.83	1796.54	2174.86	1950.48	1769.08	1794.33	2421.13	1799.41	2175.83	2226.39	1672.29	2183.8	2063.12
RAB21	1281.48	1108.32	1522.61	1475.34	2529.15	1436.47	1566.19	1610.04	1625.3	1642.21	1717.46	1673.26	1532.71	1674.23	1592.62	1724.2	2170.81	1488.51	1941.05	1699.15	1995.82	1669	2775.71	1668.95	1731.62	2034.09
SLC4A4	182.471	139.051	168.603	124.317	306.455	113.219	187.907	112.772	84.8235	119.148	117.634	193.551	60.1919	171.937	101.499	81.5572	164.726	78.1735	135.852	191.165	112.527	103.525	63.5355	34.5838	104.822	117.352
SMARCA2	5532.72	4971.48	5007.93	4930.71	5138.19	4546.97	5438.51	5287.28	5139.14	4887.83	5466.95	4246.4	5198.31	5377.12	5518.79	5616.99	5633.2	4650.79	4964.58	5173.02	5039.17	5316.69	5679.81	4114.35	4892.74	5173.57
RDH8	0	0	0	0	0	0	0	0	0	0	0	0	0	0	0	0	0	0	0	0	0	0.900218	0	0	0	0
SESN1	1202.8	2066.95	1233.83	1198.72	2157.11	1165.55	1088.78	2821.04	3649.36	1306.93	1010.78	744.879	884.559	889.463	839.675	840.667	1185.61	943.437	1096.6	871.358	942.16	912.821	1175.41	814.392	1195.18	2030.31
MID2	169.916	154.592	162.55	147.37	162.171	250.7	195.999	150.074	152.097	217.976	137.676	46.9215	193.661	109.502	107.036	182.981	45.116	192.757	113.029	121.812	107.412	162.039	173.399	75.8612	121.265	84.5436
PIH1D3	0.837022	0	0.864629	0	0	0	0	0	0	0	0	0	0	0	0	0	0	0	0	0	0	0	0	0	2.05534	0
COL5A3	80.3541	423.697	364.873	146.546	224.177	830.949	345.245	206.46	168.672	834.958	219.584	236.283	17.4469	129.673	104.267	349.232	321.058	11.7796	70.643	87.1358	375.432	333.081	145.602	329.104	325.771	103.471
SRCAP	6368.9	5576.76	6591.93	7084.45	7509.94	7517.97	7416.48	7501.09	8067.99	7611.6	7739.47	7684.24	7559.76	7896.62	7576.46	7941.38	7781.98	7717.76	6737.17	7908.02	7532.16	8173.08	6002.78	5327.02	5678.9	5853.7
KIAA0020	609.352	570.927	549.039	551.607	457.894	531.727	518.767	479.716	530.391	482.133	578.587	535.408	479.791	566.72	521.337	571.946	453.258	463.687	423.858	523.704	442.948	496.02	681.683	515.41	629.962	566.569
CPB2	0.837022	0.817947	0	3.29318	1.19243	4.04355	1.79815	1.73496	0	3.69451	1.74273	0.837885	0.872347	0	4.6136	2.09121	3.14763	2.14174	1.08682	0	1.02297	2.70065	1.32366	1.11561	1.02767	2.52369
CHRNA3	0.837022	0.817947	0	0	2.38486	3.03266	1.79815	0.867479	0	1.84725	2.6141	0	1.74469	0.960543	0.92272	5.22803	4.19684	0	0	0	1.02297	0	0	6.69363	1.02767	1.26185
KCNN2	0.837022	1.63589	0.864629	0.823294	1.19243	0	0	0	0	0	0	0	0	0	0	0	0	0	0	0.889141	0	1.80044	0	1.11561	0	0
CNOT4	747.461	610.189	683.057	672.632	841.857	830.949	943.131	893.503	945.734	951.335	968.959	818.613	832.219	815.501	925.488	1007.96	880.286	847.059	945.53	945.157	914.539	1057.76	908.028	801.005	718.341	879.506
PSEN1	2201.37	2080.86	2594.75	2386.73	2802.22	2736.47	1916.83	2576.41	2663.65	2069.85	1923.98	2933.43	2760.98	2117.04	2515.34	1723.16	4019.52	2476.92	2713.78	2667.42	3159.97	2439.59	1592.36	2715.38	2427.36	2557.76
CPOX	528.161	539.845	744.446	587.832	386.348	528.694	531.354	523.09	532.341	386.999	512.363	681.2	465.833	678.143	690.195	513.392	646.313	540.79	455.376	550.378	412.259	479.816	385.184	500.907	520.001	436.599
CLDND1	1869.07	2163.47	1532.12	1677.87	1240.13	1758.94	2764.66	1768.79	1782.27	2418.98	2465.09	2024.33	2146.84	2606.91	2602.99	2713.35	2079.53	2234.91	2112.77	1941.88	2136.99	2173.13	2074.17	1793.89	2371.86	2306.65
MOK	47.7103	57.2563	52.7424	41.988	57.2367	42.4573	52.1464	44.2414	57.524	74.8137	37.4687	37.7048	57.5749	73.9618	27.6816	73.1924	30.4271	32.1261	39.1254	44.4571	32.7352	56.7137	67.5064	76.9768	32.8854	40.3791
HSP90AA1	16018.1	12247.9	14916.6	13278.1	16856.2	12602.7	17834.1	13808.5	10880.8	14863	15870.2	16529.8	15938.6	17012.2	15062.5	16157.7	16419.1	15443	17975.9	15650.7	15770.2	16293	19494.8	16755.3	17912.3	16690.4
RBL1	543.227	456.414	547.31	567.25	431.66	471.073	709.371	530.897	590.84	511.689	711.035	801.856	581.855	893.305	671.74	724.605	537.195	522.585	577.099	787.779	405.098	561.736	708.156	485.288	753.282	523.666
DLGAP4	1143.37	1401.14	1602.16	1364.2	1599.05	1883.28	1440.32	1735.82	1753.99	1231.19	1391.57	1560.98	1324.22	1324.59	1881.43	1580.96	1909.56	1617.01	1634.57	1655.58	1595.84	1540.27	1154.23	1320.88	1137.63	1003.17
IGSF9B	98.7686	138.233	166.873	242.049	56.0443	297.201	412.676	175.231	292.495	374.992	383.401	501.055	425.705	247.82	267.589	376.418	116.462	379.088	215.19	420.564	306.892	286.269	157.515	85.9016	295.969	121.137
CFHR2	0	0	0	0	0	0	0	0	0	0	0	0	0	0	0	0	0	0	0	0	0	0	0	0	0	0
CROCCP3	270.358	261.743	224.804	265.101	230.139	276.983	330.86	336.582	420.218	460.89	311.949	382.913	339.343	370.77	319.261	350.278	313.713	326.615	280.399	407.227	288.479	329.48	181.341	175.15	174.704	201.895
NDC80	87.8873	110.423	81.2751	91.3857	98.9719	95.0234	246.347	118.845	81.8986	119.148	196.057	223.715	177.086	331.387	211.303	208.076	144.791	55.6853	139.112	141.373	98.2056	178.243	235.611	193	252.807	203.157
AP4E1	867.155	739.424	955.415	827.411	697.573	825.895	900.875	929.07	981.808	768.457	765.931	1069.98	860.134	940.371	943.02	913.859	1197.15	908.098	865.106	945.157	775.415	960.533	974.21	998.467	947.512	948.908
RSBN1	1711.71	1546.74	1560.66	1557.67	1570.43	1652.8	2190.15	1677.7	1634.07	1790.91	1945.76	1511.54	1465.54	1551.28	1874.97	1876.86	1507.71	1787.28	1599.79	1800.51	1372.83	1572.68	1973.57	1426.86	1599.05	1567.21
MAGI3	58.5916	58.8922	71.7642	71.6266	90.6249	98.056	94.403	72.0007	84.8235	133.926	78.4229	66.1929	119.511	128.713	84.8903	112.925	46.1652	116.725	54.3408	105.808	85.9299	93.6227	133.689	56.8959	130.514	95.9003
CXCL2	72.8209	47.4409	68.3057	49.3977	1063.65	112.208	217.576	203.857	140.398	403.625	230.912	475.081	550.451	188.266	166.09	462.158	276.991	476.537	318.437	154.711	585.142	527.528	210.461	303.445	496.365	225.87
AFP	0	0	0	0	0	0	0	0	0	0	0	0	0	0	0	0	0	0	0	0	0	0	0	0	0	0
COL4A4	128.064	161.136	132.288	115.261	218.215	116.252	216.677	58.1211	98.4733	99.7516	193.443	155.009	84.6176	453.376	268.512	140.111	72.3954	194.898	279.312	131.593	50.1258	174.642	51.6226	118.254	191.147	155.207
TCF7	18065.4	16570	11403.6	15048.2	11281.6	21242.8	21973.4	11930.4	13360.2	28571.5	23911.2	11829.3	21304.4	16050.7	19433.4	25410.3	6408.57	23020.5	12212.6	15510.2	9556.63	19529.3	18606.6	10982	13222	10397.6
OSTM1	1592.85	1361.06	1738.77	1605.42	1851.85	1916.64	1897.05	2144.41	1679.9	1635.74	2023.31	2228.77	1849.37	1937.41	1874.04	1804.72	2947.23	1810.84	2389.91	2467.37	2651.55	1944.47	1412.34	2294.8	2088.23	1777.94
CDH7	2.51107	0	2.59389	1.64659	0	0	0	0	0.974983	0	0	0	0	0	0	0	0	0	0	0.889141	0	0	0	0	1.02767	0
IMPG2	23.4366	16.3589	18.1572	17.2892	14.3092	20.2177	21.5778	24.2894	18.5247	38.7923	29.6264	16.7577	23.5534	22.0925	20.2998	20.9121	18.8858	21.4174	16.3022	17.7828	21.4825	20.705	31.7677	14.5029	21.5811	16.404
PCNP	3861.18	3542.53	3485.32	3553.34	5213.31	4394.33	5071.69	4505.68	4036.43	4915.54	4663.55	4285.78	4591.16	4095.75	4286.04	4787.83	4509.5	4584.4	4918.93	4220.75	5001.32	4691.04	5628.18	4578.45	5245.23	4824.04
EXD2	208.419	226.571	231.721	223.936	181.25	260.809	168.127	211.665	184.272	240.143	213.485	165.063	198.023	213.241	235.294	178.799	169.972	170.268	176.064	209.837	143.216	198.948	168.104	148.376	169.566	180.444
ARG2	16.7404	15.541	20.7511	18.9358	22.6562	43.4681	30.5686	49.4463	23.3996	37.8687	35.726	36.029	43.6173	33.619	32.2952	28.2314	36.7223	34.2679	33.6913	39.1222	50.1258	34.2083	35.7387	23.4277	24.6641	39.1172
MEF2C	1763.61	1690.7	2337.96	2036.83	2055.75	2208.79	1592.26	3063.93	3184.29	1364.2	3527.29	1857.59	1564.99	2432.09	3877.27	3259.15	1604.24	2448.01	2944.18	2970.62	2820.34	2912.21	3661.23	2426.44	2236.21	2266.27
PTPRC	57344.4	47728.9	59125.1	55001.8	47061.7	48740.9	53851.1	51761.6	51759.9	46356.8	56826.1	57404.3	57225.9	58239.6	56803.6	49804.3	61623.2	53019.9	57312.2	64998	52243.3	52912.1	43077	56341.4	57721.1	53755.9
CACNA1S	3.34809	0	0	0	0	0	0	0	0	0	0	0	0	0	0.92272	0	0	1.07087	2.17363	0	0	0.900218	0	0	1.02767	1.26185
PKP1	0	0	0	0	0	0	0.899076	0	0	0	0	0	0	0	0	0	0	0	0	0	0	0	0	0	0	0
UBA5	1022.84	875.203	804.105	834.821	816.816	880.483	928.746	771.189	734.162	754.603	1001.2	797.666	805.176	1269.84	862.743	940	802.645	766.743	861.845	803.784	647.543	893.016	951.708	794.311	974.231	839.127
STK17B	17452.7	13144.4	11255.7	12864.8	32894.4	17097.1	23795	20737.9	22682	21309.9	19726.9	12805.4	26787.1	15965.2	17852.8	22407.3	25946.9	19761.8	22494.9	17898.4	28618.7	22582	22852.9	23707.7	27784.1	28850.8
CDC14B	217.626	354.989	460.847	373.776	366.077	446.812	415.373	523.957	437.767	394.388	528.048	261.42	233.789	452.416	304.498	197.619	315.812	427.277	598.836	416.118	458.293	263.764	199.872	234.277	356.601	228.394
ZNF510	677.988	612.642	587.083	638.876	485.32	543.857	606.877	476.246	572.315	533.856	599.5	491	507.706	592.655	615.454	567.764	448.012	583.624	469.505	581.498	392.822	564.437	709.479	495.329	579.606	575.402
LRP2	0.837022	0.817947	0	0	0	0	0	0	0	0	0	0	0.872347	0	0.92272	2.09121	0	0	0	0	0	0	0	0	1.02767	0
ZNF506	493.843	697.709	492.839	681.688	869.283	711.664	932.342	1156.35	1408.85	1010.45	1063.07	718.905	887.176	849.12	933.793	861.579	627.427	897.389	666.218	1078.53	521.717	748.982	701.537	412.774	491.226	526.19
JMJD4	83.7022	85.8844	69.1703	79.0363	50.0822	67.7294	72.8252	49.4463	76.0487	58.1885	62.7383	72.0581	51.4684	66.2775	91.3493	70.0556	49.3128	68.5357	63.0353	69.353	60.3555	68.4166	79.4193	78.0924	84.2689	61.8304
DUSP12	609.352	561.93	555.092	554.9	759.579	551.944	730.05	566.464	502.116	620.677	488.836	604.115	574.876	609.945	598.845	487.252	620.082	612.538	611.877	504.143	688.462	582.441	636.678	678.288	646.404	874.459
AACS	420.185	482.589	369.197	405.884	443.585	368.974	383.906	405.98	445.567	457.195	441.783	444.917	405.641	523.496	427.219	443.337	436.471	399.435	412.99	370.772	371.34	455.51	342.827	457.398	448.064	365.935
KIAA0141	2769.71	2773.66	2575.73	2800.85	3348.35	3093.31	2568.66	2639.74	2436.48	2678.52	2395.38	2630.96	2975.57	2466.67	2706.34	2463.45	2805.58	3011.29	2099.73	2780.34	3155.88	2485.5	1882.24	2411.94	2340	2309.18
SLC13A1	0	0	0	0	1.19243	0	3.59631	0.867479	0.974983	0.923626	0	0.837885	1.74469	0	0.92272	0	6.29525	1.07087	0	1.77828	0	1.80044	1.32366	0	2.05534	1.26185
CADPS2	0	0.817947	0	0	1.19243	0	0	0.867479	0	0	1.74273	0	0	7.68434	3.69088	2.09121	0	0	4.34726	0	0	0	0	0	2.05534	2.52369
PCDHB4	2.51107	0.817947	1.72926	0	0	3.03266	0.899076	0	0	1.84725	0	0	0	0.960543	0	1.04561	0	0	0	0	0	0	1.32366	0	0	0
PCDHA6	0	0	0	0	0	0	0	0	0	0	0	0	0	0	0	0	0	0	0	0	0	0	0	0	0	0
PCDHGA2	0.837022	0	1.72926	0.823294	0	0	0	3.46991	0.974983	0	1.74273	0.837885	0	1.92109	0.92272	0	0	0	0	0.889141	0	0.900218	0	1.11561	0	0
HSPB11	480.451	486.679	429.721	465.985	331.496	383.126	430.658	390.365	357.819	417.479	508.878	412.239	457.11	578.247	480.737	392.102	429.126	424.065	454.289	410.783	363.156	378.092	416.951	411.659	511.78	483.287
PHLPP1	179.96	193.853	198	177.832	383.963	270.918	358.731	320.1	305.17	306.644	276.223	211.147	350.683	279.518	284.198	322.047	286.434	262.363	390.167	315.645	410.213	302.473	255.466	227.584	214.783	243.536
ATP8B1	30.9698	31.082	38.0437	43.6346	32.1957	63.6859	76.4215	117.977	209.621	96.9808	97.593	153.333	109.916	104.699	72.8949	99.3325	40.9191	70.6774	64.1221	135.149	80.815	79.2192	47.6516	47.971	44.1898	52.9975
IL12RB2	265.336	157.046	251.607	193.474	189.597	322.473	445.043	113.64	84.8235	172.718	168.174	397.157	141.32	300.65	329.411	486.207	806.842	191.686	277.138	236.512	305.869	280.868	371.947	243.202	153.123	276.344
SMARCD3	668.781	1010.98	1255.44	1060.4	2377.71	2075.35	1101.37	2059.39	1958.74	1456.56	860.91	1095.95	1519.63	876.976	1131.26	869.944	2584.2	1892.23	1177.02	1022.51	2135.97	1517.77	422.246	1691.26	852.966	1434.72
WDR70	702.262	658.447	756.55	660.282	600.986	603.499	575.409	618.512	663.964	603.128	551.575	634.279	697.005	635.879	730.794	613.771	573.917	698.208	692.302	677.526	659.819	592.344	702.861	697.254	691.622	981.716
FYB	8890.85	7993.8	8526.97	8981.32	11313.8	12290.4	11029.9	10491.3	9545.08	12708.2	11631	10860.7	14769.7	10753.3	11792.4	12201.2	13945	12739.1	10809.5	11567.7	9842.04	12415.8	9243.09	9932.24	9437.09	8594.43
MPP4	17.5775	14.723	14.6987	12.3494	7.15459	6.06532	4.49538	6.07235	11.6998	10.1599	2.6141	3.35154	6.97877	6.7238	6.45904	7.31924	7.34446	2.14174	7.60771	5.33485	9.20677	10.8026	3.97097	6.69363	9.24903	10.0948
STRADB	672.966	532.484	500.62	516.206	578.33	694.479	2419.41	1023.62	832.636	643.768	587.301	1065.79	730.154	489.877	930.102	2229.23	1120.56	711.058	706.43	693.53	882.827	1101.87	1474.55	804.352	706.009	591.806
BZW1	5499.24	4626.31	5206.8	4524	9501.3	4765.32	6112.82	5253.45	4138.8	6789.58	5542.76	5602.1	7012.79	6008.2	5529.86	6508.9	7336.07	6003.3	6575.24	4886.72	7369.51	6376.25	8299.32	7657.52	7265.63	7759.09
PGR	0	0	0	0	0	0	1.79815	0	0	0	0	0	0	0	0	1.04561	0	1.07087	0	0	0	0	0	0	0	0
C1QTNF3	106.302	110.423	104.62	102.912	131.168	107.154	124.073	95.4227	139.423	99.7516	93.2362	90.4915	102.937	103.739	149.481	120.245	80.7891	95.3075	76.0771	100.473	71.6082	102.625	153.544	72.5144	97.6286	100.948
ME2	1870.74	1806.85	1934.18	1849.94	1888.81	2328.07	1928.52	2347.4	1937.29	1734.57	1982.36	2706.37	2097.12	2243.83	2289.27	1812.03	3077.33	2228.48	2064.95	2285.09	2197.35	2099.31	1671.78	2568.12	2179.69	1818.32
C5orf22	618.559	555.386	630.315	629.82	527.055	646.968	532.253	658.416	639.589	467.355	559.417	776.719	526.897	762.671	704.958	561.49	820.481	592.191	676	757.548	588.211	658.059	484.458	595.733	592.966	571.616
CCNT2	2795.65	2451.39	2406.26	2623.84	2963.19	2732.43	2644.18	2792.41	2814.78	2928.82	2607.13	2513.65	2692.93	2645.33	2525.49	2750.99	2743.68	2350.56	2807.25	2603.41	2443.89	2773.57	2885.57	2371.78	2604.12	2786.15
FAM135A	325.602	340.266	402.917	358.133	533.017	460.964	353.337	451.089	575.24	428.563	321.534	315.045	552.195	354.44	322.952	360.734	318.959	431.561	372.778	368.104	509.441	425.803	296.499	379.306	321.661	349.531
COL19A1	231.018	195.489	175.52	293.916	502.014	205.21	257.136	541.307	979.858	235.525	616.056	153.333	167.491	201.714	506.573	708.921	19.935	321.261	155.415	216.95	221.986	252.061	653.886	70.2832	54.4665	61.8304
EPB41L3	1110.73	973.357	1236.42	1195.42	1389.18	1371.77	852.324	1966.57	1726.7	861.743	388.629	1557.63	1619.95	766.513	1302.88	783.159	2795.09	820.287	2184.5	1555.11	2340.57	1611.39	489.753	2316	1594.94	2182.99
COBLL1	399.26	461.322	345.852	389.418	574.752	355.832	543.941	680.971	876.51	320.498	806.014	350.236	257.342	969.188	1191.23	904.449	108.069	408.002	574.926	503.254	253.698	612.148	901.409	340.26	486.088	314.2
DLG3	211.767	342.72	401.188	306.266	367.269	289.114	510.675	291.473	244.721	267.852	479.251	372.859	228.555	501.403	326.643	299.043	285.385	310.552	382.559	395.668	236.307	282.669	348.121	226.468	454.23	360.888
KCNK2	0	0	0	0	0	0	0	0	0	0	0	0	0	0	0	0	0	0	0	0	0	0	0	0	0	0
SERTAD4	0	0	0	0	0	0	0	0	0	0	0	0	0	0	0	0	0	0	0	0	0	0	0	0	0	0
TRAF5	2562.12	2700.04	1902.18	2879.88	1946.05	2638.41	2474.26	2346.53	2517.41	2068	3146.5	2109.79	1824.95	2199.64	3473.12	2711.26	1607.39	2062.5	1760.64	2412.24	1599.93	2317.16	2575.83	1723.61	2004.98	1600.02
MRPL22	246.085	235.569	221.345	253.575	350.575	260.809	324.567	235.087	247.646	261.386	306.721	345.208	261.704	424.56	268.512	294.861	261.253	217.387	326.045	282.747	275.18	283.569	297.822	300.098	318.578	347.007
GEMIN5	500.539	417.971	481.598	443.756	295.723	353.81	375.814	391.233	404.618	318.651	513.235	465.026	378.598	488.916	549.019	470.523	420.733	356.6	334.739	604.616	270.065	385.293	438.13	296.751	385.376	252.369
OPRK1	0.837022	0	0	0.823294	0	1.01089	0	0	0	0	0	0	0	0	0	0	0	0	0	0	3.06892	0	1.32366	0	0	1.26185
NFE2L1	2139.43	2228.09	2636.25	2251.71	2271.58	2325.04	1606.65	1930.14	1512.2	1321.71	1673.89	2149.17	1595.52	1997.93	2320.64	1522.4	2273.64	1732.67	2134.51	2246.86	1934.45	1831.04	1556.62	2348.35	2002.93	1859.96
SEMA5B	0	4.08974	0	0.823294	1.19243	6.06532	3.59631	0	0	2.77088	6.09956	0.837885	6.97877	2.88163	1.84544	1.04561	0	0	0	0.889141	1.02297	2.70065	0	0	1.02767	2.52369
GSK3B	2464.19	1969.62	2427.01	2479.76	3186.18	2959.88	2646.88	2913.86	2828.43	2440.22	2962.64	2908.3	2874.38	2964.24	2841.06	2724.85	3495.96	3047.7	3003.96	3028.42	3236.69	2688.05	2195.94	2424.21	2497.24	2480.79
ITGB5	168.241	192.218	422.804	382.009	468.626	318.429	175.32	579.476	322.719	336.2	636.097	371.183	184.065	269.913	228.835	157.886	336.796	214.174	700.996	441.903	1415.8	279.968	67.5064	193	175.732	179.182
ERC1	999.404	922.644	1023.72	1169.9	1383.22	909.798	1122.05	1081.75	1330.85	1118.51	1209.46	905.753	1328.58	1282.32	1009.46	1207.67	970.518	1153.33	1330.26	1048.3	1179.49	1350.33	1137.02	1118.95	1293.84	1564.69
XPO1	6409.08	5422.99	6530.54	6067.68	5121.5	6363.53	6536.29	6509.56	6750.78	5877.03	6184.08	7473.93	6680.43	6997.55	6560.54	5544.85	8632.89	5809.47	6009.01	7385.21	5185.46	7043.31	5890.27	5872.55	6229.74	5678.3
C4orf6	0	0	0	0.823294	0	1.01089	0	0	0	1.84725	0.871366	2.51365	0	5.76326	0	1.04561	0	0	0	0	0	0	0	2.23121	4.11068	0
RNF13	1632.19	1662.89	2002.48	1994.02	2169.03	1993.47	1595.86	2428.07	2155.69	1513.82	1757.55	2320.1	2330.04	1731.86	1778.08	1740.93	3912.5	2303.44	2508.37	2107.26	2570.74	2025.49	2424.94	3026.64	2402.69	2824.01
TRPM3	4.18511	1.63589	2.59389	2.46988	2.38486	2.02177	0.899076	1.73496	0.974983	1.84725	1.74273	2.51365	1.74469	3.84217	0	0	2.09842	1.07087	0	0.889141	0	0.900218	1.32366	2.23121	7.19369	1.26185
PALB2	400.934	359.897	365.738	380.362	362.499	388.181	347.943	433.739	399.743	329.735	382.53	428.159	370.747	401.507	467.819	340.867	458.504	359.812	354.302	452.573	330.421	378.992	344.15	428.393	361.74	330.604
DOPEY1	1052.14	885.019	987.406	1191.31	1023.11	921.929	1083.39	1125.12	1326.95	1188.71	1110.99	1236.72	1322.48	1143.05	1031.6	1159.58	1169.87	1063.37	996.61	1265.25	1073.1	1143.28	1147.61	853.438	999.923	1096.54
LYRM2	686.358	664.991	721.965	652.049	684.456	639.891	539.446	601.163	459.217	516.307	611.699	633.441	583.6	677.183	729.872	607.497	771.168	660.727	686.868	686.417	673.117	528.428	876.26	751.918	840.634	757.107
BCKDHB	369.127	297.733	237.773	284.86	263.528	364.93	252.64	286.268	264.22	328.811	345.061	306.666	329.747	326.585	331.257	362.825	227.678	291.277	286.919	316.534	200.503	310.575	352.092	261.052	350.435	242.274
KAT6A	6052.51	4664.75	4624.9	5050.09	6220.92	4931.11	7251.05	5952.64	6362.74	7574.66	8080.18	5093.5	6504.22	6649.84	6402.76	7746.89	6251.19	6974.58	6236.15	6367.14	5554.75	7602.34	7972.38	4908.67	6507.21	6350.87
ZCCHC6	2199.69	2070.22	2528.18	2458.36	2919.07	2639.43	2698.13	3784.81	3716.64	2778.27	2862.44	4312.59	4080.84	3302.35	2784.77	3388.81	6814.61	2997.37	3178.94	3885.55	3698.05	3104.85	3401.79	3545.4	2765.46	3912.98
ULK2	1095.66	1022.43	1003.83	1005.24	1508.43	1497.12	1077.99	1366.28	1146.58	1399.29	724.976	1360.72	1698.46	917.318	921.798	812.436	1400.69	1318.24	1720.43	1483.98	2041.86	1125.27	724.04	1715.8	1337	967.835
GRHL2	0	0	0	0	0	2.02177	0.899076	3.46991	0.974983	0	0	0	0	2.88163	0	0	2.09842	3.21261	2.17363	0	3.06892	0.900218	0	0	0	0
TNPO1	2938.78	2409.67	2592.16	2800.85	2797.45	2538.34	3056.86	3072.61	3398.79	3125.55	3236.25	2756.64	3209.36	3422.41	2962.85	3164	3196.94	2987.73	2862.67	3241.81	2941.05	3039.14	3348.85	2558.08	3103.56	3297.2
PLOD1	1564.39	1042.88	1855.49	1464.64	2099.87	1339.43	979.993	1530.23	1397.15	995.669	832.154	1559.3	1240.48	1272.72	1263.2	719.377	2182.35	1409.27	1771.51	1389.73	1750.31	1230.6	492.4	1956.77	1190.04	1636.61
P2RX5	669.618	861.298	640.69	802.712	766.734	660.109	476.51	1457.36	1645.77	438.723	1226.01	753.258	282.64	774.198	1208.76	919.087	290.631	573.987	831.414	1044.74	436.81	804.795	1240.27	412.774	342.214	421.456
ITGAE	451.992	461.322	441.825	426.467	348.19	309.331	248.145	298.413	268.12	326.964	338.961	283.205	222.448	292.966	284.198	246.763	240.269	405.86	270.617	241.846	377.478	232.256	448.719	420.583	307.273	405.052
DIS3	1619.64	1370.88	1460.36	1494.28	2256.08	1509.25	2004.94	1548.45	1578.5	1898.05	1689.58	1669.9	1829.31	1823.11	1705.19	1905.09	1783.65	1582.75	1991.05	1700.04	1664.38	1843.65	2418.32	1712.45	1997.79	2077
PIBF1	575.034	498.13	456.524	474.218	548.519	589.347	557.427	561.259	517.716	606.823	602.985	502.731	511.195	501.403	596.077	577.174	468.996	522.585	565.144	540.598	482.844	560.836	767.72	565.612	546.72	580.449
TDRD3	540.716	452.325	499.756	518.676	597.409	489.269	484.602	518.752	535.266	514.46	471.409	638.468	462.344	559.036	573.932	506.073	525.654	474.396	458.636	571.718	454.201	483.417	582.408	412.774	438.815	442.908
	0	0	0	0	0	0	0	0	0	0	0	0	0	0	0	0	0	0	0	0	0	0	0	0	0	0
NUFIP1	183.308	152.956	173.79	145.723	321.957	177.916	164.531	157.014	160.872	161.635	184.73	143.278	222.448	191.148	202.998	173.571	133.25	156.347	169.543	180.496	199.48	195.347	303.117	190.769	208.617	233.441
PDS5B	1351.79	1116.5	1285.7	1309.04	1910.28	1350.54	1740.61	1517.22	1741.32	1766.9	1674.77	1439.49	1758.65	1869.22	1738.4	1795.3	1844.51	1548.48	1969.31	1619.13	1803.5	1885.06	1964.3	1513.88	1779.92	2045.45
OXCT1	1083.94	994.624	973.572	871.046	834.703	938.103	1122.95	775.526	753.662	899.612	1062.2	916.646	928.177	1330.35	1039.91	1096.84	647.362	832.066	923.794	890.03	557.521	956.932	1147.61	896.947	1109.88	909.791
RRAGB	410.978	382.799	332.018	372.129	442.392	381.104	437.85	422.462	469.942	401.777	479.251	358.615	373.364	340.032	416.147	476.796	391.355	441.199	434.726	388.555	431.695	397.896	471.221	427.277	434.704	345.746
EPYC	0	0	0	0	0	0	0	0	0	0	0	0	0	0	0	0	0	0	0	0	0	0	0	0	0	0
CYLD	10143.9	9284.52	7646.78	9979.98	9161.46	10011.8	18049	8018.97	9025.42	14039.1	12124.2	11456.4	12409.1	10210.6	10232	14265.2	6345.61	11011.8	9010.79	10212.7	10343.3	11950.4	17562.3	10552.5	17211.4	10737
SLC27A5	69.4728	84.2486	63.9826	55.984	36.9654	64.6968	60.2381	44.2414	52.6491	73.8901	64.4811	51.9488	43.6173	63.3958	51.6723	58.5539	51.4112	72.8192	48.9067	44.4571	34.7811	67.5164	97.9505	63.5895	64.7432	68.1397
ZNF324	364.105	378.71	328.559	290.623	419.736	398.289	458.529	361.739	384.143	509.842	407.799	338.505	423.088	379.414	407.842	464.249	376.666	439.057	461.897	324.537	350.88	442.007	356.063	307.907	290.831	355.84
ZNF671	544.064	586.468	513.59	545.844	211.061	359.876	364.126	363.474	363.669	445.188	398.214	310.017	312.3	349.638	443.828	383.737	280.139	384.442	322.784	390.333	184.135	363.688	600.94	323.526	385.376	300.319
ZNF416	87.0503	102.243	111.537	108.675	141.899	103.11	107.889	68.5308	74.0987	103.446	103.693	65.355	68.043	79.7251	96.8856	101.424	88.1335	69.6066	110.855	84.4684	92.0677	98.1238	131.042	61.3583	101.739	79.4963
ZNF586	651.203	497.312	515.319	559.84	417.351	577.216	698.582	504.005	413.393	667.782	524.562	640.982	558.302	559.996	608.995	768.52	591.754	623.247	629.267	648.184	512.51	474.415	911.999	470.786	514.863	348.269
ZNF446	364.942	346.81	298.297	279.097	361.307	335.614	358.731	333.979	339.294	480.286	321.534	246.338	326.258	293.926	306.343	391.057	279.09	397.293	314.09	250.738	340.651	360.087	275.32	240.971	253.834	302.843
	25.9477	15.541	15.5633	23.0522	22.6562	18.196	17.9815	19.0845	16.5747	20.3198	24.3982	19.2713	21.8087	8.64489	19.3771	12.5473	15.7381	17.1339	15.2154	9.78055	11.2527	22.5055	21.1785	12.2717	19.5257	10.0948
ZNF264	393.4	392.615	375.249	419.88	533.017	568.118	575.409	650.609	571.34	553.252	629.126	585.681	448.386	526.377	561.937	539.533	579.163	526.868	462.984	600.17	394.868	494.22	370.624	305.676	321.661	347.007
RPS5	16270	17711.8	12732.5	13959	12728	12837.3	10899.5	10107	9214.57	13127.5	11456.7	8328.57	13039.8	9256.75	11341.2	12941.5	5966.85	13349.5	9232.5	9681.86	10210.3	10555.1	17799.2	9812.87	11859.3	10879.6
FAT1	0.837022	0.817947	0	0.823294	0	0	1.79815	0.867479	2.92495	0	0	0.837885	1.74469	0.960543	0	1.04561	2.09842	0	0	0	0	0	0	0	1.02767	3.78554
YTHDC1	3574.92	3368.31	3455.06	3379.62	4701.76	3316.72	3612.49	3187.12	3629.86	4177.56	3625.75	3057.44	4085.2	3397.44	3340.25	4001.53	3189.59	3358.25	3409.34	3458.76	3505.73	3699.9	4634.12	3002.1	3486.88	3825.92
CHMP2B	1113.24	1010.98	1106.73	1060.4	2139.22	1224.18	1186.78	1287.34	1057.86	1302.31	1243.44	1292.02	1345.16	1108.47	1253.98	1254.73	1864.44	1296.82	1578.06	1142.55	1559.01	1407.04	1653.25	1569.66	1636.05	1548.28
SMAP2	11362.6	13622.1	12183.5	11116.1	18663.9	14073.6	10117.3	20496.8	18992.7	10447.1	12402.2	11444.7	12215.5	10189.4	11830.2	10411.1	31610.6	10307.1	10710.6	9800.11	10975.5	10585.7	14965.2	15026.1	9658.04	21875.4
PPIE	978.479	907.103	1046.2	997.833	1365.33	831.96	828.948	739.959	608.389	1463.95	856.553	1468.81	1387.9	915.397	1185.7	859.488	1153.08	788.161	770.553	678.415	699.715	1073.06	923.912	941.571	1190.04	885.816
ZMPSTE24	891.429	844.939	1172.44	940.202	1172.16	957.31	879.297	1167.63	1027.63	790.624	976.801	1310.45	1061.65	1401.43	1202.3	899.221	1681.88	960.571	1195.5	1217.23	1093.56	1002.84	792.87	1222.7	1193.12	1194.97
STARD7	3303.73	3232.53	3385.02	3101.35	4782.85	4205.29	3868.73	4292.28	3904.81	3114.47	3907.2	4115.69	3772.03	4709.54	4356.16	3612.57	4741.37	3804.8	4671.14	3877.55	4164.53	3785.42	3248.25	3401.48	3640.01	3211.4
NOA1	960.064	895.652	861.171	805.182	1247.28	1288.88	950.324	981.986	843.36	885.758	1023.85	961.892	1026.75	1036.43	1183.85	981.824	1136.29	1205.8	878.147	966.497	990.24	1026.25	705.508	857.901	821.108	875.721
REST	2348.68	1934.44	2132.18	1992.37	3175.45	2724.34	3041.58	2598.1	2367.26	3372.16	3181.36	2650.23	3092.47	3024.75	2743.25	3151.46	3081.53	3005.93	3546.28	3062.2	3443.33	3215.58	3174.13	2266.91	2559.93	2789.94
HAL	234.366	304.276	682.192	463.515	349.383	913.842	255.338	794.61	798.511	552.329	338.09	454.971	423.96	421.678	517.646	276.04	1280.03	586.837	487.98	398.335	761.093	559.936	221.05	619.161	292.886	468.145
SSH1	2474.24	2156.93	2744.33	2343.1	3962.45	3015.48	2770.05	3019.69	2811.85	2784.73	2778.79	2846.29	2836	2861.46	2650.05	2383.98	3556.82	3231.89	3561.5	2923.5	3797.28	2911.31	1904.74	2582.63	2335.89	2629.69
GSTP1	3020.81	4124.91	4348.22	3648.84	7551.67	4568.2	2886.93	4163.9	3429.99	3277.03	2511.28	3829.97	4408.84	3672.16	3694.57	1972.01	4874.62	4791.07	4453.77	3147.56	5423.81	3562.16	1350.13	4667.69	3212.5	3714.87
APLP2	12367	14402.4	23925.2	20008.5	31138	24496.8	14712.5	27487.8	22639.1	16525.5	11556.9	19542.8	19163.7	13166.2	15459.3	12557.7	31897	26420.5	22722.1	16627.8	27488.4	21219.9	8609.06	39393.2	20625.3	33902
KIAA1467	184.145	135.779	185.031	183.595	188.404	145.568	172.623	150.074	149.172	135.773	189.086	152.495	157.022	177.7	183.621	177.753	202.497	154.205	207.582	200.946	171.86	204.35	191.93	172.919	182.925	169.087
SLCO1A2	1.67404	3.27179	0.864629	2.46988	0	0	2.69723	0	0	2.77088	0.871366	0	1.74469	1.92109	0	1.04561	1.04921	1.07087	1.08682	0	0	3.60087	0	2.23121	3.08301	2.52369
WBP11	3054.29	2779.38	3104.02	2743.22	5568.66	3151.95	3653.85	2996.27	2684.13	3613.23	3477.62	2708.88	3568.77	3230.31	3441.75	3803.91	3226.32	3348.61	3997.31	2963.51	3901.63	4117.6	4456.75	3468.42	3554.71	3714.87
EIF3I	2789.79	2939.7	2915.53	2888.94	2914.3	2360.42	2310.63	1882.43	1623.35	2353.4	2301.28	2202.8	2425.12	2402.32	2362.16	2081.8	2249.5	2682.53	2344.26	2008.57	2490.94	2155.12	2708.2	3095.81	2996.69	2951.46
NKAIN1	0	0	0	0	0	0	1.79815	0	0	0	0	24.2987	0.872347	0.960543	6.45904	1.04561	5.24604	0	1.08682	2.66742	1.02297	4.50109	0	14.5029	2.05534	5.04738
COL16A1	5.85916	4.08974	6.0524	4.11647	3.5773	9.09798	5.39446	2.60244	0	5.54176	0.871366	4.18942	4.36173	2.88163	2.76816	2.09121	9.44288	3.21261	5.43408	0.889141	4.0919	1.80044	0	3.34682	0	1.26185
TXLNA	1878.28	1760.22	2044.85	1756.09	1885.24	2289.66	1845.8	1898.04	1580.45	1622.81	1944.02	2323.45	1876.42	2492.61	2467.35	1848.63	2304.06	2048.58	2109.51	2311.77	2025.49	1891.36	1334.24	1615.4	1421.27	1250.49
APOB	0	0	0	0.823294	0	0	0	0	0	0	0	0	0	0	0	0	0	0	0	0.889141	0	0	0	0	0	0
NCOA1	3628.49	3122.92	3465.43	3824.2	5443.45	4122.4	4919.75	4398.98	4184.63	4533.16	4690.56	4496.93	5349.23	4497.26	4029.52	4348.67	5455.89	4585.47	5185.2	4822.7	5425.86	4928.69	3771.09	3691.54	3691.39	4408.89
AGBL5	423.533	521.032	446.149	408.354	543.749	621.695	648.234	547.379	475.792	631.76	500.164	485.135	549.578	523.496	527.796	472.614	418.634	588.979	556.45	484.582	529.901	575.239	477.84	564.496	403.874	456.788
EFR3B	21.7626	9.81537	9.51092	13.1727	5.96216	16.1742	3.59631	28.6268	33.1494	17.5489	20.9128	12.5683	13.0852	13.4476	30.4498	7.31924	11.5413	6.42522	17.3891	19.5611	19.4365	13.5033	2.64731	10.0405	9.24903	10.0948
KIF3C	116.346	176.677	271.494	248.635	274.259	227.45	262.53	242.027	202.796	235.525	284.065	234.608	158.767	207.477	260.207	192.391	231.875	263.434	285.833	300.53	480.798	178.243	141.631	198.578	171.621	211.99
RAB10	3091.12	2709.04	3896.88	3325.29	2517.22	3717.03	2591.14	3975.65	3300.32	2025.51	2771.82	5318.89	2842.98	3503.1	3789.61	2510.5	5358.31	3469.62	3898.41	4643.98	4069.39	3283.1	1784.29	4594.06	4208.31	2224.63
GCKR	1.67404	0	0.864629	1.64659	2.38486	0	0	0.867479	0.974983	0	0.871366	0	0	0.960543	0	0	0	0	1.08682	1.77828	2.04595	0.900218	0	0	8.22136	0
HADHA	5351.92	5998.82	6316.12	6004.29	6441.52	5993.55	4450.43	5094.7	4322.1	5147.37	4592.1	3940.57	5069.21	4504.95	4956.85	3915.79	5337.33	6703.65	4816.77	4262.54	5617.15	4160.81	3804.19	5659.47	4913.29	4662.52
MAPRE3	101.28	126.782	161.686	128.434	163.363	209.254	154.641	150.074	166.722	193.038	144.647	152.495	153.533	124.871	139.331	121.29	227.678	191.686	189.106	160.935	210.733	134.133	115.158	148.376	94.5456	126.185
CAD	1710.87	1662.07	1623.77	1822.77	981.372	1436.47	1559	1296.01	1289.9	2088.32	1674.77	1539.19	1403.61	1787.57	1814.99	1654.15	1218.13	1310.75	1199.84	1547.99	988.194	1622.19	1654.57	1150.19	1545.62	1148.28
CD59	338.157	477.681	422.804	511.266	404.235	272.939	620.363	318.365	225.221	404.548	486.222	375.372	277.406	686.788	590.541	465.295	395.552	475.466	418.424	301.419	408.167	432.105	706.832	499.791	741.978	596.853
CD82	728.209	1397.87	1255.44	1316.45	1165.01	1217.11	1158.91	843.189	705.888	1012.29	1567.59	1125.28	822.623	960.543	1465.28	988.097	825.727	1499.22	1129.2	1083.86	1138.57	1117.17	979.505	1303.03	1429.49	926.195
BCORL1	316.394	344.356	391.677	371.306	374.424	396.268	356.034	454.559	428.018	290.942	357.26	368.669	339.343	329.466	401.383	340.867	441.717	427.277	370.604	441.014	366.225	325.879	250.171	282.248	288.775	228.394
ATRX	3544.79	2812.1	3547.57	3437.25	3737.08	3377.37	4035.05	4258.45	4219.73	3854.29	4871.81	4201.15	4050.3	5246.48	4687.42	4345.54	3974.4	3850.85	3838.63	4970.3	3515.96	4249.93	4026.56	3022.18	3859.93	3412.03
TAF9	1179.36	1161.48	1112.78	1146.03	1317.64	1189.81	1158.01	1027.96	992.533	1309.7	1157.17	1263.53	1207.33	1211.24	1219.84	1209.77	1155.18	1255.06	1134.64	1073.19	1100.72	1158.58	1857.09	1510.53	1414.07	1369.1
FCN1	18968.6	22289.1	38094.7	32800.1	39177.4	38454.1	26786.2	46589.7	41820.9	21179.7	12022.2	34251.9	32370.2	17415.6	24968.8	14976.2	43691.2	48062.8	38826.5	23032.3	59624.1	37932.5	8444.92	75287.8	47058	58427.2
MYNN	816.097	712.432	830.044	772.25	1139.97	747.045	881.095	801.55	668.838	876.521	843.482	783.422	758.941	775.158	823.989	836.485	915.959	756.035	890.102	807.34	850.092	796.693	1013.92	758.612	889.962	990.549
MECOM	2.51107	4.90768	4.32315	13.1727	10.7319	9.09798	1.79815	3.46991	0	1.84725	3.48546	2.51365	0.872347	4.80271	1.84544	5.22803	4.19684	4.28348	11.955	7.11313	12.2757	3.60087	3.97097	4.46242	2.05534	0
SCAMP1	918.213	655.176	837.826	792.833	927.712	874.417	731.848	945.552	910.634	716.734	781.615	868.886	786.857	767.474	899.652	876.218	1200.29	879.185	937.922	1013.62	925.792	871.411	929.206	1053.13	976.286	913.576
PREP	1130.82	1042.88	1298.67	1097.45	1104.19	1072.55	1086.08	1047.05	1004.23	865.438	990.743	1167.17	996.22	1093.1	1203.23	976.596	1511.91	992.697	1156.37	1095.42	1055.71	981.238	788.899	1111.14	1101.66	1077.62
HACE1	431.066	377.892	343.258	373.776	430.468	443.779	444.144	457.161	453.367	473.82	448.753	412.239	379.471	378.454	399.538	392.102	412.339	455.12	449.942	384.109	447.04	437.506	415.628	378.19	397.708	347.007
SEH1L	508.072	547.207	449.607	494.8	548.519	540.825	623.959	654.079	831.661	696.414	737.176	646.847	831.346	746.342	693.886	761.201	545.589	612.538	547.755	679.304	774.392	609.448	595.645	487.52	530.278	405.052
WDR47	499.702	415.517	531.747	458.575	606.948	546.89	507.978	569.933	589.865	542.169	475.766	506.92	475.429	461.061	490.887	427.653	620.082	651.089	651.003	581.498	636.29	548.233	504.313	573.421	514.863	651.112
WDFY1	1893.34	1674.34	2055.22	1759.38	2717.55	2151.17	2652.28	2775.93	2502.78	1852.79	1960.57	2593.25	3182.32	2496.45	2272.66	2660.02	4701.5	2195.28	3614.75	2698.54	3198.84	3021.13	2787.62	2790.13	2349.25	3112.97
OVGP1	174.938	206.941	117.59	198.414	176.48	176.905	183.412	119.712	185.247	190.267	167.302	102.222	171.852	98.9359	139.331	188.209	49.3128	160.631	121.723	112.032	97.1826	143.135	251.495	73.63	91.4626	123.661
SLC25A24	1075.57	1163.94	1520.88	1122.15	1628.86	1364.7	1142.73	1996.94	1706.22	927.321	998.585	1888.59	1359.12	1064.28	1300.11	1012.15	2325.05	1479.94	1560.67	1660.03	1574.36	1426.85	927.882	1996.93	1793.28	1487.72
MAP3K4	1035.4	1092.78	1180.22	1067.81	1055.3	1185.77	899.975	1032.3	1169	1087.11	1069.17	972.784	1000.58	1021.06	1030.68	1081.16	914.91	1039.82	908.578	1085.64	994.331	973.136	1095.99	827.779	963.954	1008.21
PILRA	1757.75	1881.28	3118.72	2357.09	3518.87	3443.08	1861.09	3007.55	2213.21	2474.39	1688.71	2667.82	3746.73	1711.69	2140.71	1477.44	4458.09	3361.46	3656.05	2766.12	4900.05	2605.23	966.268	4300.66	2586.65	2615.81
IGSF9	5.85916	3.27179	3.45852	11.5261	7.15459	8.0871	14.3852	11.2772	7.79987	12.9308	17.4273	7.54096	6.97877	19.2109	12.9181	17.7753	7.34446	14.9922	6.5209	13.3371	5.11487	14.4035	9.26559	6.69363	4.11068	5.04738
ABCB1	754.157	588.104	888.839	814.238	746.463	426.594	268.824	517.885	428.018	459.042	374.687	486.811	233.789	623.392	517.646	424.516	1185.61	457.262	357.562	529.039	437.833	358.287	407.686	247.664	253.834	382.339
ZNF213	239.388	321.453	409.834	307.912	351.768	541.835	391.997	471.041	389.018	374.992	299.75	614.169	411.748	433.205	516.723	294.861	610.64	479.75	480.373	511.256	511.487	406.899	157.515	393.809	228.143	270.035
AKR1B1	1747.7	1648.16	1693.81	1314.8	1514.39	1448.6	1474.49	1145.94	1103.68	1456.56	1485.68	1144.55	1313.75	1697.28	1460.67	1618.6	968.42	1200.45	1392.21	1846.75	1061.85	1305.32	1673.1	1274.02	1313.36	1515.48
CPNE3	2264.14	2129.93	2803.13	2256.65	2465.95	2488.8	2377.16	2918.2	2611	2140.97	2783.14	2487.68	2546.38	2701.05	2821.68	2322.29	3557.87	2820.67	2627.92	2817.69	2583.01	2459.4	1604.27	2497.84	2458.19	1892.77
RRN3	1162.62	934.914	1084.24	1057.93	1477.42	1041.21	1422.34	1014.95	1136.83	1282.92	1180.7	1052.38	1117.48	1211.24	1174.62	1376.02	1074.39	1007.69	1265.05	1368.39	1280.76	1209.89	1422.93	1002.93	1200.32	1141.97
CTTN	151.501	196.307	413.293	412.471	564.02	402.333	217.576	650.609	392.918	313.109	673.566	256.393	207.618	308.334	303.575	175.662	500.473	278.426	941.183	476.58	1920.12	450.109	84.7139	162.878	223.004	193.062
WNT11	5.02213	6.54358	6.91703	15.6426	13.1168	11.1198	6.29353	9.54227	3.89993	12.9308	4.35683	7.54096	6.97877	16.3292	7.38176	5.22803	25.181	7.49609	19.5627	8.89141	16.3676	13.5033	5.29462	5.57803	12.332	11.3566
MTIF2	813.586	754.147	810.157	827.411	692.803	797.59	739.94	770.321	779.012	673.324	674.437	832.019	840.07	816.461	847.057	766.429	824.678	702.491	708.604	779.777	597.417	707.571	779.633	823.317	553.914	734.394
DDHD2	2023.08	2098.03	1674.79	1821.13	1977.05	1884.29	2154.19	2018.62	1982.14	2184.38	2205.43	1809.83	1945.33	1899.95	2252.36	2488.54	1326.2	2011.09	1869.32	1900.09	1529.35	2146.12	2604.95	1392.28	1750.12	1675.73
TTC39A	35.1549	37.6256	22.4804	9.87953	23.8486	22.2395	8.99076	19.952	9.74983	25.8615	13.0705	5.86519	25.298	11.5265	11.9954	12.5473	15.7381	20.3465	17.3891	11.5588	16.3676	11.7028	13.2366	16.7341	7.19369	20.1895
EPS15	2705.26	2873.45	3604.64	3177.92	3184.99	3014.46	3567.53	4104.04	4042.28	2800.44	4254.01	4350.3	3222.45	4723.95	4172.54	3069.9	4908.2	3727.7	4012.52	4240.31	3716.47	3632.38	2673.78	3257.57	3411.86	3067.55
ORC1	68.6358	41.7153	38.0437	44.4579	57.2367	46.5008	115.082	29.4943	28.2745	65.5775	99.3357	118.98	115.15	290.084	111.649	133.838	80.7891	26.7718	72.8167	64.0182	51.1487	100.824	87.3613	58.0115	135.652	116.09
MGST2	207.582	280.556	274.087	257.691	243.256	274.961	170.825	276.726	241.796	143.162	115.892	191.876	251.236	146.963	250.98	87.8309	366.174	267.718	229.318	154.711	275.18	185.445	88.6849	507.601	219.921	222.085
CHERP	811.074	853.119	942.446	793.656	1145.93	991.68	849.627	988.926	926.234	916.237	914.934	891.509	847.921	1010.49	1077.74	885.628	1010.39	953.075	781.421	928.263	851.115	970.435	648.591	724.028	578.578	634.708
ATG16L1	1795.41	1707.06	1671.33	1557.67	2067.68	1544.64	1632.72	1407.05	1419.58	1876.81	1449.08	1392.56	1339.05	1558.96	1386.85	1574.68	1318.86	1471.38	1663.92	1385.28	1530.37	1496.16	1527.5	1368.85	1525.06	2039.14
USP40	644.507	555.386	510.996	652.872	670.147	709.643	670.711	617.645	724.412	766.61	711.906	665.28	630.707	666.617	723.413	703.693	690.379	607.184	723.82	650.851	528.878	662.561	628.736	649.283	667.985	548.903
POMGNT1	1054.65	1129.58	949.363	1008.54	882.4	892.613	1102.27	974.179	947.684	1015.99	1068.29	1016.35	917.709	1039.31	1060.21	1073.84	867.696	916.665	939.009	1042.07	893.057	932.626	921.264	759.728	808.776	812.628
RAD54L	36.829	18.8128	28.5328	18.1125	33.3881	36.3919	63.8344	41.639	51.6741	28.6324	80.1657	90.4915	80.2559	105.66	58.1314	71.1012	46.1652	24.63	33.6913	39.1222	39.896	42.3103	29.1204	33.4682	39.0515	42.9027
MAST2	377.497	395.886	555.092	475.864	634.374	552.955	506.18	600.295	518.691	497.835	500.164	597.412	546.961	723.289	641.291	525.94	687.232	545.073	633.614	713.091	605.601	540.131	307.088	409.427	379.21	376.03
DNAJA1	2840.85	2277.98	2944.06	2879.06	3206.45	2519.13	3081.13	2768.99	2236.61	2637.88	2589.7	3703.45	2840.36	2913.33	2792.15	3419.13	4135.98	2617.21	3322.4	2966.18	3276.59	3218.28	4521.61	4243.76	3166.25	2890.89
B4GALT1	4529.13	3981.77	4136.39	3476.77	6991.23	3852.49	5279.38	4831.86	4647.74	5006.05	5606.37	3912.08	4907.82	7244.41	5449.59	5407.87	6334.07	4904.59	6715.44	4793.36	6273.9	5584.95	5838.64	4221.45	5360.33	7793.16
CHMP5	870.503	713.25	1041.01	949.258	623.642	825.895	910.764	1203.19	948.659	606.823	745.018	1765.42	964.815	896.186	931.947	1263.09	2028.12	799.94	1163.98	1299.04	1003.54	1089.26	1702.22	1839.63	1493.2	1342.6
NFX1	1669.02	1872.28	1682.57	1651.53	1682.52	1796.35	1757.69	1888.5	1765.69	1964.55	1845.55	1725.2	1624.31	1775.08	2034.6	1859.09	1650.41	1670.56	1722.6	1835.19	1344.19	1883.26	1964.3	1607.59	1853.92	1587.4
AQP6	0.837022	0.817947	0	0	1.19243	0	0	0	0	0	0	0.837885	1.74469	0	0	0	3.14763	1.07087	1.08682	0.889141	0	0.900218	0	2.23121	2.05534	1.26185
DIMT1	1435.49	1371.7	1303.86	1379.02	1272.33	1667.96	1890.76	1618.72	1495.62	1778.9	2152.27	1731.91	1899.1	1644.45	1961.7	1945.87	1328.3	1863.31	1599.79	1910.76	1420.91	1683.41	2034.46	1385.58	1962.85	1314.84
IPO11	303.002	251.928	261.118	263.454	237.294	254.744	323.667	301.883	318.819	318.651	367.716	286.557	294.853	398.625	263.898	323.092	241.318	220.599	306.482	303.197	307.915	306.074	365.329	261.052	322.688	360.888
FOLH1	0	0	0	0	1.19243	0	0	0	0.974983	0	0	0	0	0.960543	0	2.09121	0	0	2.17363	1.77828	0	0	1.32366	1.11561	1.02767	0
EIF2AK1	4273	4025.12	3896.02	3851.37	4235.52	3780.72	4015.27	4551.66	3526.51	3779.48	4224.38	4243.89	3219.83	4077.5	3856.97	3719.22	4609.17	3599.2	4668.96	3610.8	5453.48	4048.28	4067.59	4637.57	3980.17	4567.88
NME8	71.9839	62.9819	107.214	93.0323	188.404	130.404	74.6233	119.712	128.698	92.3626	47.9251	144.116	93.3411	106.62	56.2859	30.3226	131.151	104.945	90.2057	87.1358	280.295	91.8223	23.8258	107.098	48.3005	116.09
EPDR1	15.0664	36.8076	34.5852	40.3414	36.9654	42.4573	17.0825	26.0244	13.6498	15.7016	17.4273	59.4898	17.4469	58.5931	28.6043	17.7753	163.677	29.9844	36.9517	35.5657	23.5284	15.3037	9.26559	44.6242	27.7471	22.7132
SNX10	1348.44	1609.72	1788.92	1996.49	2482.64	2417.03	1491.57	3008.42	2858.65	2029.21	1569.33	2436.57	2877	1446.58	1814.99	1588.28	4569.3	2504.77	2643.14	1854.75	3060.74	2071.4	1482.49	3212.94	1775.81	2291.51
SEPHS1	929.095	831.852	874.14	829.881	901.479	814.775	824.453	779.863	737.087	931.939	878.337	886.482	837.453	1111.35	1023.3	902.358	850.908	867.405	936.835	831.347	742.68	877.713	860.376	840.051	818.025	784.868
MRPL28	724.024	847.393	901.808	726.146	994.489	785.459	906.269	772.056	725.387	740.748	723.234	971.108	896.772	1000.89	832.294	720.422	1014.58	909.169	985.742	738.876	886.919	831.802	659.18	1033.05	889.962	894.648
HBQ1	1.67404	5.72563	1.72926	8.23294	8.34703	3.03266	77.3206	12.1447	6.82488	19.3962	11.3278	14.244	0.872347	7.68434	11.9954	98.2869	12.5905	7.49609	9.78134	14.2263	21.4825	19.8048	27.7968	10.0405	9.24903	2.52369
ITPKC	262.825	333.722	371.791	303.796	299.3	367.963	217.576	445.017	332.469	243.837	224.812	381.238	252.108	224.767	356.17	223.76	677.789	314.836	241.273	295.195	274.157	250.261	315.03	285.595	212.728	579.187
CEACAM6	0	13.0872	5.18777	33.7551	8.34703	16.1742	22.4769	5.20487	1.94997	13.8544	14.8132	18.4335	12.2129	8.64489	98.7311	88.8765	996.748	405.86	8.69453	32.0091	18.4135	18.9046	39.7097	3.34682	1.02767	6.30923
FAT2	20.9256	24.5384	13.8341	36.225	22.6562	27.2939	38.6603	53.7837	66.2989	35.0978	24.3982	56.1383	30.5321	50.9088	18.4544	21.9577	57.7065	20.3465	39.1254	44.4571	38.873	26.1063	26.4731	15.6185	32.8854	36.5935
RBM22	2010.53	1874.73	1979.14	1790.67	3131.33	2342.23	2134.41	2004.74	1792.02	2288.75	2106.09	2120.69	2045.65	2066.13	2239.44	2371.43	2604.14	2174.94	2306.22	2061.03	2293.51	2406.28	2358.75	2208.9	2026.57	2112.33
TMED2	3285.31	2956.88	3217.28	3022.31	4862.74	3442.07	3945.15	3574.88	2980.52	3156.95	3321.65	3593.69	3451.88	4832.49	3659.51	3392.99	4400.38	3768.39	4251.62	3449.87	4439.71	3726	3317.08	4363.13	4536.14	4535.07
ERO1LB	662.922	537.391	507.537	578.776	519.9	597.434	815.462	638.464	768.287	644.691	753.732	495.19	707.473	660.853	535.178	677.552	507.817	554.711	697.736	670.413	755.978	627.452	739.923	563.381	662.847	644.803
ZFAND6	1466.46	1502.57	1555.47	1519.8	1328.37	1221.15	1238.03	1257.84	1369.85	1092.65	1436.01	1818.21	1328.58	1702.08	1507.72	1165.85	1529.75	1236.86	1438.94	1562.22	1611.19	1280.11	1387.19	1705.76	1721.35	1565.95
HSD17B2	0.837022	0.817947	0.864629	1.64659	0	0	1.79815	0	0	0	0	0.837885	5.23408	0	2.76816	0	0	2.14174	0	0	0	1.80044	0	0	2.05534	2.52369
TXLNG	1215.36	1068.24	1188.87	1173.19	1095.85	1135.23	1103.17	1080.88	1045.18	1051.09	1138.88	1139.52	986.624	970.148	1207.84	1317.46	1014.58	1132.98	893.363	1205.68	825.541	1068.56	1756.49	1017.43	1094.47	937.551
PPEF1	4.18511	11.4513	9.51092	7.40965	17.8865	8.0871	8.99076	10.4097	15.5997	11.0835	19.1701	2.51365	14.8299	8.64489	5.53632	5.22803	6.29525	14.9922	8.69453	8.00227	4.0919	8.10196	3.97097	6.69363	6.16602	5.04738
LAT2	1890	2833.37	4482.24	3560.75	4336.88	4021.31	1719.03	3268.66	2986.37	2139.12	2391.9	3266.91	2846.47	2335.08	3715.79	2437.31	6335.12	3392.52	2276.88	2467.37	3438.22	3004.93	2111.23	4386.56	1843.64	3037.26
HUWE1	6097.71	5023.83	6002.26	7988.43	6389.05	6192.69	8034.15	7483.74	9000.07	7109.15	8091.5	9516.69	8124.16	9821.55	6724.79	7458.31	6682.41	6490.55	6027.48	9390.22	7046.25	8152.38	7640.14	4528.24	8122.7	7707.35
ZW10	383.356	341.902	372.655	389.418	205.098	340.669	281.411	331.377	284.695	235.525	311.078	388.778	292.236	455.297	423.529	299.043	429.126	275.214	308.656	399.224	257.79	317.777	260.76	339.144	319.605	263.726
ALG9	123.879	134.143	102.026	119.378	98.9719	124.339	149.247	111.905	163.797	172.718	143.775	113.952	162.256	170.977	155.017	187.163	91.2812	140.284	130.418	136.039	87.9758	147.636	148.249	97.0577	144.901	113.566
MYBPC2	16.7404	10.6333	9.51092	13.996	20.2713	29.3157	17.9815	30.3618	29.2495	15.7016	20.0414	12.5683	17.4469	10.566	41.5224	48.0979	2.09842	18.2048	22.8231	22.2285	20.4595	27.0065	45.0043	17.8497	4.11068	10.0948
NOX4	2.51107	5.72563	8.64629	7.40965	0	0	0	0.867479	0	0	0	0	0	0	0	0	0	0	1.08682	0	0	0	3.97097	6.69363	3.08301	6.30923
ACOX3	350.712	306.73	328.559	324.378	329.111	443.779	316.475	373.016	379.268	270.623	342.447	397.157	318.406	395.744	364.474	279.177	470.046	350.175	353.215	397.446	339.628	388.894	247.524	342.491	244.585	278.868
MTMR2	572.523	431.058	594.865	377.892	636.759	460.964	605.078	576.006	518.691	484.904	697.093	613.332	520.791	699.275	603.459	605.406	574.966	474.396	627.093	651.741	484.89	652.658	578.437	473.017	536.444	516.095
PPP1R15A	4294.76	4632.85	4312.77	4108.24	12915.2	7869.75	7278.92	8668.71	5300.01	11187.9	9950.13	7814.11	10566.7	6096.57	9124.78	11957.5	11332.5	11512.9	8580.41	6960.2	15168.7	11684.8	9004.83	12665.5	6480.49	5254.32
HSD17B14	10.0443	4.90768	13.8341	9.05624	11.9243	23.2504	9.88984	4.33739	3.89993	1.84725	7.84229	8.37885	16.5746	10.566	22.1453	6.27363	8.39367	18.2048	8.69453	10.6697	3.06892	14.4035	11.9129	11.1561	4.11068	11.3566
TRIP6	164.056	226.571	191.083	170.422	219.408	235.537	247.246	269.786	234.971	257.692	285.808	394.644	280.896	256.465	282.352	333.548	311.615	280.568	280.399	330.761	241.422	362.788	264.731	242.086	267.194	214.514
ACHE	0	1.63589	0.864629	2.46988	7.15459	0	17.0825	4.33739	0	3.69451	4.35683	3.35154	2.61704	0.960543	5.53632	17.7753	1.04921	4.28348	6.5209	2.66742	12.2757	9.00218	0	0	6.16602	1.26185
FTL	41967.5	43127.9	53262.9	43246.8	84712.8	59160.1	46017.4	69459	52793.4	52158.1	42504.4	72735.9	60867.1	41312	49599	38708.3	87991.9	78645.8	84866.2	50529	110972	62758.7	32310.4	92376.6	63078.4	73206
SRRT	4013.52	4527.34	4202.1	3876.89	6013.44	4601.56	5042.02	3976.52	3664.96	4753.9	4533.72	3894.49	4307.65	4583.71	4449.36	5003.22	3452.95	4426.98	4512.46	4344.34	4176.81	4346.25	3886.25	3957.05	3796.21	4070.71
BAX	1655.63	1682.52	1688.62	1602.95	1934.13	1781.18	1804.45	1727.15	1465.4	1525.83	1514.43	2270.67	1615.59	1571.45	1779	1757.66	2177.11	1558.12	1850.85	1583.56	1891.48	1668.1	1802.82	2134.15	1984.43	1697.18
NLK	613.537	550.478	564.603	615.001	784.62	758.165	659.023	772.056	770.237	646.538	757.217	821.127	629.834	727.131	843.366	655.595	877.139	659.656	829.241	756.659	857.253	756.183	708.156	638.126	617.63	652.374
PIGS	1482.37	1582.73	1872.79	1712.45	2065.29	1960.11	1449.31	1867.68	1603.85	1534.14	1289.62	1891.94	1749.05	1767.4	1814.99	1341.51	2470.89	1729.46	1975.83	1636.91	2075.62	1715.82	1098.63	2066.1	1513.76	1723.68
ADAMTS2	0.837022	1.63589	75.2227	1.64659	77.5081	15.1633	90.8067	310.557	316.87	4.61813	0.871366	702.147	3.48939	7.68434	3.69088	1.04561	4923.94	229.166	6.5209	0.889141	15.3446	7.20175	3.97097	4.46242	0	47.9501
TMPRSS11E	1.67404	0	1.72926	10.7028	2.38486	7.07621	2.69723	3.46991	3.89993	0	0.871366	35.1912	0	0.960543	4.6136	4.18242	0	6.42522	0	0	10.2297	0.900218	1.32366	0	41.1068	2.52369
ATXN7L3	3426.77	3641.5	3676.4	3321.17	5140.58	4239.66	4409.97	4236.77	3676.66	4891.53	4152.93	4204.51	4485.61	3799.91	4467.81	4499.24	4832.66	4918.51	4825.46	3942.45	4688.29	4393.06	3511.66	4350.86	3780.8	3767.87
PGS1	1164.3	1283.36	1628.1	1278.58	1312.87	1565.86	1464.6	1547.58	1521.95	1400.22	1586.76	1555.95	1378.31	1168.98	1195.85	1417.84	1675.59	1528.13	1374.82	1277.7	1604.02	1305.32	1191.29	1334.26	1128.38	1921.79
PSMC5	1987.09	2045.69	1846.85	1825.24	1498.89	1509.25	1766.69	1335.05	1071.51	1478.73	1431.65	1590.31	1474.27	1667.5	1528.02	1534.95	1470.99	1515.28	1305.27	1406.62	1399.43	1497.96	2018.57	2060.52	2068.7	1740.08
UIMC1	1227.91	1238.37	1284.84	1205.3	1297.37	1213.06	1079.79	1044.44	1077.36	1055.7	1231.24	1104.33	963.943	1131.52	1093.42	1065.47	1281.08	1209.01	1197.67	1093.64	1168.24	1175.68	1601.62	1415.7	1339.05	1433.46
CETP	33.4809	40.8974	33.7205	35.4017	34.5805	47.5117	36.8621	55.5186	43.8742	27.7088	54.8961	62.8413	40.1279	41.3033	18.4544	27.1857	49.3128	51.4018	65.209	76.4661	54.2177	13.5033	19.8548	18.9653	24.6641	31.5461
MMP2	1.67404	0	1.72926	4.93977	8.34703	0	1.79815	0.867479	0	2.77088	4.35683	0.837885	0.872347	0	0.92272	3.13682	6.29525	2.14174	0	3.55657	7.16082	0.900218	0	3.34682	1.02767	1.26185
MT3	2.51107	8.99742	1.72926	2.46988	2.38486	12.1306	4.49538	0	0.974983	1.84725	1.74273	5.02731	0.872347	2.88163	0	4.18242	1.04921	6.42522	2.17363	3.55657	1.02297	5.40131	5.29462	3.34682	6.16602	7.57107
LPCAT2	939.139	1000.35	1315.97	1169.08	1841.12	1644.71	1008.76	2067.2	1691.6	1365.12	1124.93	1543.38	2194.82	1144.97	1273.35	896.084	3522.19	1879.38	1756.29	1524.88	2898.09	1670.8	577.114	2097.34	1512.73	1438.5
GNAO1	73.658	162.771	316.454	137.49	375.616	90.9798	427.061	209.062	194.997	162.558	247.468	187.686	78.5112	292.966	107.958	85.7397	69.2478	264.505	341.26	245.403	247.56	108.026	68.8301	60.2427	231.226	430.289
OGFOD1	677.988	650.268	668.358	642.17	394.695	531.727	485.501	454.559	477.742	404.548	496.679	642.658	514.684	608.024	627.45	529.076	549.785	504.38	426.032	607.283	365.202	464.513	536.08	637.011	665.93	466.883
SH3BP2	6464.32	6757.06	7499.79	7001.3	12501.5	9628.7	6803.31	10567.6	9925.33	7188.58	6800.14	8440.01	10246.6	7749.66	8008.29	6954.32	13427.8	8303.53	10678	9673.86	14231.6	8997.68	4084.8	7964.31	7161.83	6985.58
NOP14	1109.05	1062.51	968.385	1021.71	928.905	821.851	911.663	778.996	818.986	907.001	920.162	825.316	908.985	899.068	941.175	929.543	713.462	830.995	779.247	872.248	697.669	837.203	1127.75	938.224	930.041	821.461
ADD1	9516.11	8742.22	8886.66	8624.01	11124.2	9429.55	10349.3	9652.43	8788.5	8963.79	9693.07	9322.3	8697.3	9767.76	10597.4	9622.71	9930.76	10151.9	10243.2	9657.85	9759.18	9763.77	9220.58	9523.93	8492.66	8369.82
L2HGDH	89.5614	91.6101	70.035	82.3294	67.9686	84.9145	101.596	76.3381	74.0987	77.5846	118.506	98.0325	129.107	113.344	98.7311	116.062	70.297	72.8192	63.0353	93.3598	71.6082	72.0175	78.0957	99.2889	82.2136	65.616
TXNDC16	346.527	300.187	330.288	346.607	387.54	405.366	411.777	379.956	299.32	399.007	304.107	364.48	505.089	382.296	277.739	293.815	313.713	467.97	347.781	308.532	439.879	381.693	259.436	416.121	329.882	311.676
C14orf166	1905.9	2012.97	1807.94	1868.88	2009.25	1626.52	1727.13	1494.67	1304.53	1678.23	1549.29	1584.44	1745.57	1623.32	1945.09	1578.86	1610.54	1811.91	1646.53	1429.74	1632.67	1638.4	2399.79	2340.54	2224.91	2145.14
NID2	137.272	116.148	83.869	104.558	156.209	165.785	172.623	130.989	136.498	145.933	141.161	113.952	167.491	94.1332	130.104	159.978	102.822	149.922	146.72	106.697	113.55	163.84	157.515	88.1329	106.878	103.471
GMCL1	1195.27	920.191	1151.69	1053.82	938.444	1109.95	1026.75	1069.6	1071.51	1153.61	1247.8	1145.39	1025.88	1230.46	1263.2	1161.67	1461.55	1070.87	1023.78	1149.66	996.377	1146.88	942.443	1067.63	955.733	739.441
SF3B2	6705.38	6946.01	7260.29	6207.64	7461.05	6985.23	6832.08	7097.71	5943.5	6295.44	5845.12	7017.28	6417.85	7516.25	7240.59	6779.71	7350.76	6938.17	7715.31	6487.17	7047.27	7271.96	6709.61	7241.4	6928.55	6388.72
KLHL42	751.646	707.524	576.708	646.286	521.093	815.786	629.353	594.223	580.115	706.574	588.172	675.335	721.431	591.694	708.649	638.865	613.787	706.774	561.884	642.849	640.382	574.339	595.645	576.768	667.985	533.761
GNAS	17745.7	18828.3	18111.4	18277.1	25967.6	18748.9	20427	21953.3	18514.9	19563.3	22839.4	19688.6	20134.6	21961.9	21676.5	20228.3	16121.1	19735.1	22356.9	21910.2	30451.9	21649.3	20768.2	21679.6	18884.5	20088.6
DNM1L	1942.73	1824.84	1792.38	1944.62	2229.85	2102.64	2002.24	1990	2184.94	2168.67	2051.2	2351.94	2350.1	2239.99	2052.13	2029.52	2158.22	2184.58	2313.83	2151.72	2365.12	2151.52	1659.86	2066.1	2268.07	2042.93
PTHLH	0.837022	0.817947	0	0.823294	0	0	0	0	0	0	0.871366	0	0	0.960543	0.92272	1.04561	0	1.07087	0	0	0	0	0	1.11561	0	2.52369
PHACTR3	5.02213	7.36152	7.78166	9.05624	8.34703	6.06532	2.69723	15.6146	20.4746	2.77088	1.74273	10.0546	6.10643	5.76326	1.84544	2.09121	16.7873	5.35435	8.69453	8.00227	17.3906	1.80044	0	12.2717	3.08301	3.78554
ERGIC2	431.066	401.612	453.93	430.583	357.73	484.215	436.951	523.957	499.191	370.374	522.82	738.176	442.28	822.225	613.609	575.083	534.047	376.946	439.074	687.306	360.087	527.528	596.969	575.653	593.993	421.456
TFAP2C	0	0	0.864629	0	0	0	0	0	0	0	0	0	0	0	0	0	0	0	2.17363	0.889141	0	0.900218	0	0	0	0
AURKA	44.3622	39.2615	44.0961	56.8073	19.0789	54.5879	44.9538	32.9642	15.5997	21.2434	57.5102	85.4642	42.745	209.398	85.813	52.2803	54.5589	29.9844	53.254	63.129	28.6433	69.3168	39.7097	59.1271	85.2966	35.3317
CASS4	378.334	335.358	392.542	368.836	462.664	427.605	204.989	342.654	289.57	541.245	382.53	242.987	304.449	309.295	248.212	394.193	270.696	455.12	240.186	359.213	255.744	244.859	354.74	244.318	310.356	365.935
PIR	3.34809	3.27179	1.72926	4.11647	7.15459	0	1.79815	0	0	1.84725	2.6141	3.35154	8.72347	19.2109	0.92272	4.18242	4.19684	4.28348	1.08682	1.77828	2.04595	6.30153	2.64731	11.1561	2.05534	3.78554
AAMDC	25.9477	27.8102	25.9389	32.9318	23.8486	25.2722	35.064	21.687	27.2995	40.6396	22.6555	19.2713	27.0427	20.1714	11.0726	33.4594	17.8365	27.8426	20.6495	16.8937	30.6892	30.6074	51.6226	44.6242	52.4112	36.5935
RFX2	250.27	260.107	249.013	336.727	280.222	295.179	332.658	362.606	376.343	547.71	271.866	439.889	348.939	186.345	404.151	231.079	517.26	504.38	647.742	336.095	490.005	387.094	148.249	332.451	219.921	365.935
SLC6A14	0.837022	0.817947	0.864629	0	0	0	0	0	0	0	0	0	0	0	0	0	0	0	0	0	0	0	0	1.11561	0	0
METTL2A	140.62	144.777	159.092	160.542	124.013	200.156	234.659	189.11	179.397	171.794	241.368	241.311	170.108	261.268	250.057	192.391	187.808	199.182	218.45	212.505	136.056	194.447	197.225	158.416	195.257	176.658
SULT2B1	0.837022	4.08974	5.18777	4.11647	3.5773	15.1633	8.09169	11.2772	16.5747	9.23626	4.35683	9.21673	13.0852	15.3687	13.8408	11.5017	4.19684	7.49609	0	19.5611	2.04595	1.80044	6.61828	1.11561	2.05534	8.83292
ALG6	523.139	497.312	491.109	492.33	443.585	567.108	532.253	510.945	562.565	496.911	544.604	562.221	512.94	641.643	545.328	480.979	636.87	427.277	507.543	564.605	477.729	463.612	483.134	455.167	518.973	465.621
CNOT3	1373.55	1550.83	1618.59	1420.18	1387.99	1902.49	1479.88	1741.03	1433.23	1556.31	1503.98	1790.56	1306.78	1670.38	1755.01	1538.09	1719.65	1649.14	1316.13	1644.91	1400.45	1596.09	1137.02	1270.67	982.452	1076.35
GP6	23.4366	34.3538	83.0044	46.9278	112.089	86.9363	108.788	125.784	87.7485	102.523	188.215	144.954	91.5964	63.3958	76.5858	66.9188	94.4288	62.1105	130.418	115.588	274.157	103.525	26.4731	23.4277	57.5495	37.8554
PTPN4	2677.63	1939.35	2504.83	2238.54	2371.75	2061.2	2786.24	1996.07	2292.19	2284.13	2080.82	3303.78	2106.72	2860.5	2232.06	2285.69	3036.41	1865.46	2308.4	2896.82	1645.97	2066	2316.4	1513.88	1992.65	2234.73
DDX18	3563.2	3249.7	3222.47	3267.66	3016.85	3137.79	3542.36	3245.24	3060.47	2995.32	3274.59	2986.22	3545.22	3341.73	3623.52	3527.87	3015.43	3156.93	3195.24	3440.09	3006.52	3094.05	3903.46	3207.37	3831.15	3129.38
KHSRP	3437.65	3454.19	3534.6	3214.14	5481.61	5032.2	4994.37	4497.88	3887.26	4664.31	4272.31	4869.79	4627.8	4842.1	5144.17	4955.13	4776	4837.12	4990.66	4443.93	4804.91	5015.12	2999.4	4137.78	3381.03	3210.13
GNA11	169.916	148.866	150.445	125.964	159.786	227.45	145.65	152.676	136.498	143.162	202.157	138.251	178.831	94.1332	159.631	112.925	121.708	134.93	114.116	210.726	167.768	152.137	58.2408	159.532	79.1306	146.374
ASAP3	51.8954	61.346	32.8559	43.6346	39.3503	48.5226	51.2474	37.3016	40.9493	43.4104	52.282	41.8942	48.8514	36.5006	108.881	37.6418	15.7381	58.8979	61.9485	81.801	35.8041	54.0131	38.386	53.5491	66.7985	27.7606
EDEM2	944.161	945.547	1207.02	984.66	1170.97	1196.89	1058.21	1139	1081.26	1005.83	1057.84	1300.4	1072.11	1567.61	1289.96	955.684	1454.2	1300.04	1331.35	1134.54	1501.73	1326.02	784.928	1419.05	1142.77	1215.16
DNMT3B	33.4809	38.4435	46.69	37.0483	38.1578	35.381	33.2658	40.7715	33.1494	47.1049	35.726	40.2185	30.5321	79.7251	55.3632	20.9121	33.5747	49.26	45.6463	37.3439	39.896	35.1085	17.2075	42.393	18.4981	34.0698
REM1	0	0	0	0	0	0	0	0	0	0	0	0	0	0	0	0	0	0	0	0	0	0	0	0	0	0
TPX2	126.39	80.1588	111.537	80.6829	58.4292	101.089	221.173	58.9885	31.1995	87.7445	251.825	421.456	259.959	788.606	289.734	283.359	197.251	37.4805	144.547	175.161	81.838	243.959	133.689	185.191	326.799	184.229
FER1L4	20.0885	15.541	9.51092	16.4659	23.8486	17.1851	35.9631	4.33739	12.6748	16.6253	39.2115	28.4881	30.5321	203.635	72.8949	47.0523	12.5905	21.4174	33.6913	38.2331	18.4135	58.5142	18.5312	12.2717	38.0238	54.2594
PDRG1	236.877	251.928	257.659	259.338	343.42	307.31	243.65	228.147	166.722	219.823	201.286	255.555	175.342	243.017	272.202	281.268	236.072	222.741	266.27	224.064	252.675	270.966	411.657	273.323	249.724	258.678
EPB41L1	4.18511	12.2692	10.3755	9.05624	13.1168	8.0871	1.79815	2.60244	2.92495	8.31264	12.1991	1.67577	5.23408	1.92109	2.76816	4.18242	3.14763	10.7087	3.26045	2.66742	14.3216	3.60087	1.32366	5.57803	7.19369	5.04738
SLC15A1	0	0	0.864629	1.64659	0	0	0	0	0	0	0	0	0	0	0	0	0	0	0	0	0	0	0	1.11561	0	0
DOCK9	2657.55	2254.26	2049.17	2627.13	1873.31	2232.04	3526.18	1773.99	2035.76	3136.64	2759.62	2077.12	2997.38	2370.62	2647.28	3101.27	1402.79	2544.39	1791.07	2284.2	1520.14	2869.9	3788.3	1769.35	3070.68	2309.18
ANKRD10	2684.33	2751.57	2368.22	3011.61	3106.29	3356.14	3408.4	3294.68	3809.26	3270.56	3857.54	3442.03	3601.05	3596.27	3543.25	3792.41	3253.6	3100.17	3458.25	3525.45	3756.36	3188.57	3142.36	2447.64	2695.58	2498.45
TGDS	358.245	305.094	313.86	296.386	213.445	258.787	262.53	278.461	288.595	291.866	257.924	289.07	252.98	308.334	291.58	303.226	264.401	289.135	289.093	309.421	252.675	251.161	395.773	285.595	330.91	280.13
DOCK3	143.131	141.505	154.769	130.081	153.824	155.677	214.879	175.231	200.847	235.525	194.315	218.688	199.767	121.028	129.181	226.896	154.234	143.497	96.7266	154.711	186.181	162.939	193.254	116.023	131.542	89.591
C3orf18	344.016	357.443	319.048	231.346	197.944	376.05	378.511	290.605	240.821	360.214	236.14	387.941	282.64	269.913	323.875	307.408	180.464	315.907	282.572	283.636	205.618	324.079	386.507	305.676	313.439	228.394
COQ9	595.123	654.358	662.306	630.644	504.399	568.118	398.291	554.319	475.792	408.243	410.413	594.898	365.513	513.89	512.11	410.923	592.803	428.348	423.858	451.684	390.776	397.896	442.101	574.537	473.756	492.12
TMEM40	41.0141	64.6178	146.987	125.141	203.906	194.09	89.9076	253.304	143.323	127.46	270.123	196.065	70.6601	196.911	100.577	61.6907	186.759	103.874	341.26	179.607	451.132	165.64	29.1204	94.8265	76.0476	146.374
KIF9	51.0584	53.1666	38.0437	36.225	54.8519	57.6206	37.7612	58.1211	41.9243	60.0357	50.5392	43.57	52.3408	48.0271	26.7589	56.4627	64.0017	59.9687	48.9067	40.0114	54.2177	42.3103	33.0914	41.2774	41.1068	61.8304
ARHGAP28	2.51107	0.817947	1.72926	2.46988	0	0	0	0	0	0	0	0	0	0	0	1.04561	0	0	0	0	0	0	0	0	0	3.78554
CRLS1	511.421	597.101	607.834	613.354	807.277	842.069	648.234	804.153	823.861	668.705	690.122	934.241	702.239	745.381	765.858	603.314	1116.36	806.365	636.874	719.315	655.727	657.159	418.275	753.034	581.661	562.783
DEFB127	0	0	0	0	0	0	0	0	0	0	0	0	0	0	0	0	0	0	0	0	0	0	0	0	0	0
PPP1R13B	511.421	437.602	505.808	461.045	447.162	465.008	499.886	464.969	455.317	544.016	566.388	388.778	417.854	514.851	472.433	451.702	345.19	534.364	416.251	472.134	323.26	554.534	312.383	283.364	325.771	341.96
ATRN	1287.34	1322.62	1513.1	1601.31	1925.78	1488.03	1205.66	1604.84	1535.6	1409.45	1160.66	1322.18	1440.24	1402.39	1389.62	995.417	1460.5	1657.71	1430.25	1319.49	1658.24	1338.62	988.771	1297.45	1397.63	1443.55
SMOX	141.457	174.223	329.424	284.037	553.289	297.201	346.144	651.476	364.644	338.047	722.362	501.893	238.151	499.482	301.73	241.535	388.207	250.584	706.43	427.677	531.947	441.107	119.129	239.855	272.333	244.798
SIGLEC1	1010.29	292.007	1083.38	1453.11	1322.41	762.209	5407.94	8941.97	8517.45	253.997	22.6555	16867.5	7298.92	3774.93	284.198	4937.35	22795.1	501.167	9194.46	5022.76	4880.61	15045.3	1955.04	14849.8	7537.96	15534.6
FKBP1A	3981.71	4487.26	5493.85	4546.23	8747.68	7301.64	6001.33	7144.55	6029.3	5720.02	5954.04	7205.81	8162.55	6188.78	6342.78	4848.47	10119.6	8744.73	7714.22	6401.82	11376.5	6824.55	3090.74	7596.16	5806.34	6128.78
NSFL1C	1008.61	1159.85	1269.28	1206.95	1247.28	1316.17	881.994	1284.74	1190.45	1040	923.648	920.835	957.837	973.99	1109.11	886.674	1611.58	1051.59	1042.26	964.718	1156.98	932.626	844.492	1265.1	812.887	1264.37
SLC4A11	9.20724	17.9948	18.1572	12.3494	8.34703	7.07621	14.3852	29.4943	24.3746	4.61813	26.141	26.8123	10.4682	53.7904	30.4498	14.6385	13.6397	20.3465	20.6495	18.672	23.5284	20.705	7.94193	8.92485	10.2767	16.404
C20orf194	338.157	534.937	583.625	587.832	920.558	618.663	499.886	893.503	957.433	616.982	442.654	754.096	779.878	479.311	553.632	333.548	794.251	788.161	628.18	649.962	910.448	574.339	219.727	651.514	612.491	656.16
ZNF343	267.847	256.835	232.585	238.755	160.978	257.776	221.173	211.665	289.57	247.532	251.825	212.823	199.767	197.872	217.762	235.261	189.907	189.544	179.325	227.62	155.492	175.543	214.432	179.613	210.672	204.419
EBF4	148.99	211.03	116.725	125.141	279.029	205.21	120.476	142.266	137.473	216.129	118.506	45.2458	107.299	80.6856	59.0541	86.7853	103.872	114.583	179.325	151.154	9.20677	43.2105	45.0043	44.6242	23.6364	70.6633
CPXM1	29.2958	27.8102	35.4498	52.6908	44.12	40.4355	30.5686	19.952	8.77485	27.7088	26.141	12.5683	20.9363	22.0925	59.9768	59.5995	20.9842	42.8348	29.344	11.5588	28.6433	23.4057	15.8839	34.5838	17.4704	27.7606
MAVS	1609.59	1433.04	1596.11	1626.01	1471.46	1788.26	1596.76	1722.81	1802.74	1794.61	1713.11	1650.63	1828.44	1767.4	2028.14	1557.95	1823.52	2013.24	1565.02	1738.27	1679.72	1510.57	882.878	1247.25	1100.63	1217.68
	249.433	203.669	115.86	177.008	312.417	234.526	252.64	151.809	160.872	343.589	253.567	91.3294	356.79	155.608	163.321	492.48	67.1494	264.505	202.148	176.939	187.204	370.89	565.201	203.04	126.403	164.04
F11	0.837022	0.817947	0	1.64659	0	1.01089	0	0	0.974983	3.69451	3.48546	1.67577	2.61704	1.92109	0	2.09121	2.09842	1.07087	3.26045	4.44571	4.0919	2.70065	0	0	0	3.78554
XRN2	3786.69	3836.17	4419.98	4267.14	4497.85	4517.65	4091.7	4359.08	4137.83	3710.21	3929.86	4099.77	4367.84	3887.32	4215.91	3503.82	5304.8	4980.62	4509.2	4122.06	4439.71	4267.03	3375.32	4611.91	4387.12	4614.57
PLK1S1	855.437	736.97	608.699	683.334	721.422	668.196	757.022	692.248	715.638	744.443	804.271	589.871	596.685	668.538	644.059	680.689	536.146	643.593	756.424	670.413	641.405	640.955	882.878	612.468	716.286	783.606
DYNLL1	1077.25	1154.94	1543.36	1303.28	740.5	1117.03	855.921	983.721	803.386	612.364	888.793	1329.72	772.027	1173.78	1169.09	716.24	1082.78	943.437	907.491	1196.78	1031.16	790.392	763.749	1419.05	1233.2	770.988
TESC	592.612	343.538	464.306	395.181	803.699	566.097	678.803	427.667	350.994	473.82	367.716	365.318	389.067	413.033	418.915	312.636	589.655	569.703	507.543	667.745	917.608	487.018	203.843	578.999	504.586	460.574
SNX5	1920.97	1940.17	2158.11	1893.58	1977.05	1729.63	1755	1912.79	1790.07	1402.06	1708.75	1919.59	1758.65	2224.62	2022.6	1684.47	2180.26	1623.44	2051.91	2075.26	2213.72	1871.55	1740.61	2215.59	2179.69	1878.89
RPL6	32214.5	32280.3	28761	29729.2	35870.7	32331.2	29005.1	25057.1	22161.4	35556.8	30506.5	19950.9	28421.1	23639	26084.4	26219.6	18736.8	34264.6	23625.2	21990.2	27354.3	22691.8	33055.6	23773.6	24206.8	26411.7
SIRPG	1186.9	916.101	870.682	971.487	343.42	768.274	937.737	458.029	499.191	741.672	1082.24	943.458	1027.62	841.436	1286.27	1022.6	359.879	840.633	661.871	834.904	546.269	1046.05	1123.78	942.687	1108.86	677.611
MAPKAPK5	1050.46	1075.6	983.948	1099.92	1148.31	1171.62	1223.64	1029.7	1070.53	1133.29	1093.56	1072.49	1134.05	1013.37	1063.9	1151.21	1078.59	1160.82	1157.46	941.601	1056.73	1118.07	1196.58	1030.82	1194.15	1102.85
P2RX7	719.839	916.919	773.843	923.736	1242.51	837.014	581.702	1009.75	925.259	525.543	340.704	1197.34	1372.2	742.5	855.362	517.575	1086.98	593.262	1002.04	752.214	973.872	680.565	341.503	1092.18	566.246	657.421
ESF1	532.346	461.322	374.384	451.165	350.575	383.126	388.401	393.835	419.243	491.369	495.807	411.401	462.344	454.337	474.278	490.389	418.634	457.262	433.64	544.154	325.306	424.003	602.263	473.017	518.973	437.86
RBBP9	380.008	321.453	457.389	384.479	361.307	415.475	342.548	331.377	297.37	354.673	346.804	355.263	324.513	362.125	380.161	342.959	366.174	323.403	420.598	342.319	291.548	294.371	389.155	387.115	375.1	336.913
ANAPC5	4709.09	4710.56	4803.01	4879.67	4582.52	5019.05	4941.32	4393.78	4578.52	5015.29	4911.89	5057.47	5015.12	5524.08	4970.69	4572.43	4725.64	4716.11	4662.44	4689.33	4711.82	4743.25	4775.75	4597.41	4762.22	4725.61
SLC23A2	1379.41	1660.43	1356.6	1629.3	2315.7	1779.16	1693.86	1930.14	2027.96	1947.93	1739.25	1493.11	1892.12	1735.7	1696.88	1624.87	1472.04	2174.94	1644.35	1539.99	1831.12	1777.93	1094.66	1324.22	1266.09	1463.74
SLC8B1	1633.03	1725.87	1519.15	1538.74	2040.25	2144.09	1546.41	1474.71	1492.7	2181.61	1457.8	1227.5	1878.16	1270.8	1621.22	1635.33	1464.7	2075.35	1396.56	1398.62	1388.18	1620.39	1424.25	1523.92	1144.82	1125.57
TMEM230	2023.92	2170.01	2098.45	1966.03	2878.53	2433.2	2288.15	2229.42	2051.36	1773.36	2026.8	2032.71	2309.1	2239.99	2269.89	1920.78	2362.82	2303.44	2402.95	2107.26	2066.41	2302.76	2037.11	2406.36	2574.31	2531.26
DZANK1	89.5614	88.3383	95.1092	99.6186	112.089	101.089	98.8984	91.0853	115.048	94.2099	78.4229	93.8431	109.916	96.0543	82.1221	82.6029	104.921	65.3231	99.9871	96.0273	96.1596	90.0218	97.9505	69.1676	87.3519	83.2818
KDM2B	2123.53	2122.57	2156.39	1864.76	2580.42	2223.95	2541.69	2316.17	2113.76	2396.81	2424.14	2074.6	2209.65	2197.72	2585.46	2480.18	1728.05	2352.7	2759.43	2484.26	2540.05	2452.19	2019.9	1742.58	1870.36	1907.91
C20orf26	0.837022	1.63589	4.32315	0.823294	5.96216	0	5.39446	2.60244	0.974983	0.923626	0	0.837885	0.872347	1.92109	1.84544	1.04561	2.09842	1.07087	0	0	1.02297	0	0	0	1.02767	2.52369
LHX5	0	0	0	0	0	0	0	0	0	0	0	0	0	0	0	0	0	0	0	0	0	0	0	0	0	0
TASP1	220.137	229.843	204.052	212.41	187.212	216.33	155.54	144.001	153.072	155.169	209.999	162.55	142.192	197.872	190.08	157.886	138.496	118.867	197.801	220.507	137.079	177.343	255.466	204.156	232.253	219.561
OAS1	1833.08	1321.8	1967.03	1994.84	739.308	1474.88	1756.8	3001.48	2179.09	421.174	770.287	6113.21	2228.85	2137.21	2074.28	3043.76	7510.24	790.302	3781.03	3993.13	2627	3280.4	4289.97	7466.75	4256.61	3803.2
GCN1L1	4464.68	4076.65	4113.91	4642.56	3492.63	3896.97	4398.28	3672.04	3693.24	4176.64	4293.22	3769.64	3893.28	5223.43	4474.27	4272.34	3196.94	3965.43	3495.2	3836.64	3156.9	4257.13	4194.66	3129.27	3863.01	3709.83
RPLP0	36981.3	36499.3	29036.8	32284.7	35555.9	34418.7	34471.5	24724.9	22213	37065.1	31973.9	24539.1	34327.7	31194.6	32680.9	34599.1	18320.2	36184.7	26660.7	24711	28816.2	29222	44519.8	28909.8	31052.1	30906.4
PXN	5715.19	5728.08	7380.47	6174.71	9143.57	7703.97	8423.45	8037.19	7464.47	7571.89	6382.76	9230.98	6612.39	7544.1	6241.28	5896.17	11946.3	8819.69	7601.19	7664.4	7363.37	7169.34	3671.82	5594.76	5392.18	7232.9
SIRT4	25.9477	31.082	21.6157	31.2852	3.5773	20.2177	14.3852	17.3496	21.4496	9.23626	13.9419	15.9198	7.85112	15.3687	15.6862	19.8665	12.5905	16.0631	8.69453	16.0045	15.3446	5.40131	11.9129	11.1561	12.332	8.83292
RPH3A	50.2213	391.797	653.66	139.137	510.361	688.414	189.705	543.909	440.692	556.023	169.916	134.899	372.492	219.964	430.91	273.949	71.3462	207.749	299.961	467.688	1147.78	339.382	157.515	539.953	373.044	724.299
KIF16B	441.948	429.422	467.764	461.868	432.853	375.039	429.758	372.148	397.793	450.73	405.185	459.161	436.173	386.138	393.079	395.239	508.866	463.687	294.527	507.7	286.433	384.393	411.657	271.092	581.661	339.436
TRMT6	537.368	661.719	587.948	691.567	856.166	569.129	833.444	608.97	632.764	761.068	749.375	811.072	875.836	608.984	792.617	794.66	871.893	689.641	787.942	738.876	913.516	729.177	671.093	761.959	1101.66	909.791
CHGB	0.837022	18.8128	1.72926	23.8755	0	4.04355	10.7889	8.67479	5.8499	25.8615	6.09956	17.5956	9.59581	7.68434	11.0726	2.09121	0	3.21261	1.08682	9.78055	7.16082	2.70065	0	6.69363	1.02767	5.04738
PEBP1	2686.84	3049.31	2229.01	2315.1	2772.41	2532.27	3480.32	2010.82	1736.44	3103.38	3246.71	2198.61	2621.4	3468.52	3089.27	3061.53	1313.61	2826.03	2833.33	2233.52	2196.33	3078.75	3599.02	2880.49	3328.62	2791.2
TBX5	0	0	0	0	0	0	0	0	0	0	0	0	0	0	0	0	0	0	0	0	0	0	0	0	0	0
BRAP	669.618	570.109	671.817	619.117	977.794	762.209	687.793	744.297	662.989	706.574	665.724	811.072	646.409	747.302	802.767	734.015	855.105	728.192	735.774	752.214	625.038	736.378	746.542	688.329	645.377	736.918
ERP29	4132.38	4913.41	5506.82	4575.87	4503.82	4204.28	3814.78	3376.23	3063.4	3954.04	3482.85	3276.97	3676.07	4062.14	4334.02	3527.87	3637.61	4298.47	3608.23	3217.8	4172.71	3984.37	5158.29	5906.02	5121.91	5418.36
NOS1	5.02213	1.63589	1.72926	1.64659	0	0	0	0	0	0.923626	0	0	0	0	0	0	0	0	0	0	0	0	0	1.11561	3.08301	2.52369
FUS	7657.08	9238.71	7028.57	7580.9	7687.61	5909.65	7107.2	5825.99	7149.55	8441.94	7232.34	5643.15	7929.63	6427.95	5647.05	7432.17	4983.74	6681.16	5371.05	5734.07	6758.79	7256.66	8062.39	7638.55	7934.64	7414.6
IGBP1	1638.05	1635.08	1742.23	1684.46	1469.08	1429.39	1282.98	1152.88	955.483	1226.58	1220.78	1157.96	1300.67	1097.9	1310.26	1171.08	1226.53	1607.38	1230.28	1089.2	1336.01	1318.82	1998.72	2046.02	1793.28	1740.08
FXYD5	7123.06	9975.68	9049.21	7530.67	8748.88	8259.96	7803.08	6519.1	5566.18	7492.46	6408.9	5673.32	6473.68	5404.01	7523.86	7259.64	5832.55	8583.03	6110.08	5708.29	8293.26	7744.58	8204.02	9280.72	9439.15	8360.99
ZNF302	485.473	980.719	845.607	924.56	533.017	814.775	846.93	857.069	990.583	991.051	1034.31	683.714	934.283	634.919	819.376	940	453.258	889.893	673.826	914.926	593.325	756.183	791.546	478.595	620.713	567.83
GRAMD1A	3248.48	2532.36	2007.67	2202.31	2562.54	3498.68	3074.84	2889.57	2528.13	3783.17	3067.21	2661.96	3059.32	2195.8	2848.44	3263.34	2067.99	3598.12	2404.04	2491.37	2295.56	2790.68	2022.55	2265.8	1670.99	1801.92
FXYD3	0	0	0.864629	0.823294	1.19243	1.01089	0.899076	0	0	0	0	0.837885	0	0	0	0	0	0	0	1.77828	1.02297	0	0	0	0	0
HEPH	0.837022	1.63589	2.59389	2.46988	1.19243	2.02177	1.79815	2.60244	4.87492	4.61813	1.74273	0.837885	0	1.92109	0.92272	1.04561	0	3.21261	1.08682	0	2.04595	0	3.97097	6.69363	0	1.26185
CDIP1	1216.19	1084.6	1357.47	973.134	1043.38	1185.77	845.132	1117.31	873.585	900.536	831.283	754.096	869.73	1071.97	1086.04	900.267	1167.77	991.626	1068.34	979.834	1193.81	972.236	794.193	1132.34	822.136	781.082
CMTM1	35.1549	26.9923	61.3887	51.0443	31.0032	64.6968	25.1741	73.7357	70.1988	32.3269	50.5392	93.0052	49.7238	54.7509	59.9768	31.3682	108.069	65.3231	36.9517	58.6833	50.1258	38.7094	11.9129	32.3526	13.3597	22.7132
KCNH4	10.0443	8.17947	9.51092	7.40965	13.1168	12.1306	8.99076	16.4821	7.79987	8.31264	13.0705	30.1638	6.97877	7.68434	11.0726	16.7297	9.44288	5.35435	16.3022	19.5611	13.2987	12.6031	5.29462	10.0405	8.22136	8.83292
GANAB	9336.98	8855.1	9874.06	8735.15	8491.31	8416.64	7528.87	7433.42	6763.46	7193.2	7501.59	6887.41	7315.5	10209.6	9142.31	7924.65	8402.06	7620.31	8165.25	7337.19	7653.9	8049.75	6918.75	8285.6	7954.17	7680.85
GMIP	4164.19	4761.27	5027.82	4108.24	6113.6	6847.75	5243.41	6663.97	5867.45	5780.05	5565.41	6657.83	6416.11	5242.64	6241.28	5482.11	7874.31	6635.11	6953.45	6556.53	7576.15	6317.73	3086.76	5591.42	3990.44	4123.71
RBM41	453.666	404.066	402.053	427.29	480.55	505.443	628.454	652.344	646.414	544.94	642.197	591.547	608.898	675.262	614.532	618.999	521.457	599.687	532.54	556.602	440.902	525.727	479.163	433.971	506.641	495.905
BIRC5	14.2294	18.8128	19.8865	17.2892	5.96216	5.05443	19.7797	11.2772	0.974983	11.0835	37.4687	31.8396	17.4469	80.6856	35.0634	24.0489	13.6397	5.35435	10.8682	22.2285	13.2987	15.3037	45.0043	35.6994	45.2175	45.4264
LAG3	105.465	264.197	317.319	118.554	612.91	165.785	748.931	532.632	366.594	229.983	562.902	1223.31	306.194	790.527	545.328	453.793	256.007	263.434	480.373	518.369	103.32	318.677	316.354	203.04	344.269	499.691
MLF2	1835.59	1954.89	2203.94	1869.7	3183.79	2580.79	2648.68	2621.52	2176.16	2917.74	2399.74	2298.32	2389.36	2286.09	2384.31	2342.16	2802.44	2758.56	2803.99	2247.75	2962.53	2657.44	2119.17	2622.79	1945.38	2325.58
OTUB2	14.2294	32.7179	39.7729	31.2852	108.511	64.6968	77.3206	43.3739	44.8492	89.5918	46.1824	62.8413	95.0858	65.3169	61.8223	65.8732	45.116	67.4648	44.5595	36.4548	49.1028	89.1216	46.3279	42.393	43.1621	44.1646
DDX24	4471.37	4625.49	4393.18	4192.22	7037.74	3901.01	6626.19	4305.3	4103.7	6007.27	5360.64	4040.28	5333.53	4817.12	5322.25	7627.69	3887.32	4280.27	5755.78	5169.47	5048.38	6591.4	8430.36	5134.02	6086.89	7032.26
ZBTB25	944.161	846.575	565.467	715.443	809.662	961.353	1249.72	885.696	925.259	1181.32	1046.51	863.859	1161.09	891.384	907.034	1117.75	518.309	1089.08	796.636	889.141	665.957	988.44	953.032	688.329	794.389	738.18
NECAP1	1602.06	1440.4	1364.38	1242.35	2713.98	1806.45	1905.14	1742.76	1761.79	2339.55	1571.07	1334.75	2668.51	1675.19	1547.4	2059.84	1757.42	1838.68	1982.35	1547.99	1949.79	2007.49	2035.78	1799.47	1582.61	2384.89
ARHGAP4	13281	13550.1	11394.1	10219.6	15098.6	14548.7	14026.5	12679.9	11782.7	15442.1	12675.8	11823.4	13283.2	11479.4	12513.9	13201.8	11680.8	14362.5	14073.2	12856.1	13658.8	12928.9	8804.96	11701.6	10422.6	11017.2
ANKRD24	41.0141	26.9923	25.0742	28.8153	50.0822	45.4899	45.8529	43.3739	51.6741	105.293	27.0123	33.5154	73.2771	51.8693	42.4451	44.961	24.1318	49.26	41.299	76.4661	58.3096	60.3146	38.386	43.5086	27.7471	41.6409
DHX32	287.936	215.12	354.498	340.844	298.108	381.104	209.485	340.919	320.769	243.837	317.177	263.934	300.087	235.333	358.938	260.356	389.256	348.033	274.964	275.634	217.894	243.059	227.669	240.971	203.479	287.701
RCOR1	1489.06	1422.41	1812.26	1624.36	2239.39	1797.36	1366.6	2226.82	2257.09	1910.98	1664.31	1823.24	2037.8	1744.35	1790.08	1530.77	2845.45	2369.84	2364.91	2145.5	2692.47	1680.71	1336.89	1961.23	1868.3	2232.2
GPATCH2L	2628.25	2185.55	2215.18	2497.88	2830.83	2299.77	2480.55	2851.4	3136.52	2838.3	2590.57	2623.42	2945.91	2466.67	2268.97	2488.54	2322.95	2724.29	2515.98	2596.29	2754.87	2617.83	2254.19	2621.67	2351.31	2792.46
LTBP4	1369.37	2175.74	1645.39	1527.21	2258.47	1863.06	2167.67	1857.27	1515.12	1833.4	1764.52	1704.26	1697.59	2487.81	1677.51	1535.99	1256.95	2013.24	2277.97	1868.09	1255.19	1398.04	999.36	1102.22	1236.29	1176.04
BLVRB	558.294	866.206	1462.95	926.206	1205.55	992.691	1033.04	1174.57	1051.03	822.951	512.363	1221.64	1007.56	568.641	826.757	814.527	1526.6	1474.59	883.581	816.232	1360.56	958.732	414.304	1926.65	1125.3	1509.17
SLC9A1	867.155	870.296	1194.92	928.676	1254.44	1216.1	932.342	1118.18	990.583	1007.68	1063.07	1291.18	1047.69	1162.26	1167.24	1002.74	1402.79	1218.65	1167.24	1090.09	1154.94	1195.49	737.276	977.271	954.705	856.793
SPTLC1	1076.41	1026.52	1175.03	1201.19	1429.73	1181.73	1259.61	1427.87	1393.25	1141.6	1154.56	1351.51	1250.94	1223.73	1203.23	1047.7	1784.7	1389.99	1458.51	1201.23	1538.55	1344.03	1053.63	1500.49	1292.81	1448.6
PAPOLA	7544.08	6995.08	7690.88	7636.88	7798.51	8427.76	8164.51	8293.96	8209.36	7312.35	8042.71	8073.02	8031.69	8790.89	8738.16	8323.02	8283.5	8499.5	7520.77	7675.96	8492.74	7824.7	8282.11	8483.07	7526.65	7216.49
CCNK	1837.26	1698.88	1745.69	1650.71	3062.17	2045.02	2451.78	2131.4	1958.74	2399.58	2214.14	2710.56	2636.23	2452.27	2316.03	2622.38	3129.79	2035.72	2790.94	2182.84	2806.02	2879.8	2229.04	2389.63	2233.13	2037.88
PCBP4	301.328	443.327	362.28	320.262	626.027	425.583	636.546	386.895	336.369	429.486	477.509	671.146	321.024	486.035	509.342	445.428	244.466	442.269	521.672	552.157	339.628	362.788	393.126	222.006	490.199	314.2
RGS1	544.901	518.578	346.716	537.611	3989.88	828.927	1090.58	633.259	270.07	1209.03	1617.26	290.746	1031.99	1535.91	1888.81	3655.44	862.45	758.176	1152.03	868.691	789.737	2308.16	5391.25	1066.52	2312.26	3520.55
YPEL3	1319.15	1491.12	1408.48	1284.34	1919.82	2390.75	2156.88	2028.17	2084.51	2806.9	2521.73	2376.24	1669.67	2237.1	2150.86	2054.62	1869.69	2696.45	2256.23	2367.78	2101.19	2219.04	943.766	1346.54	632.017	874.459
MRPS33	381.682	322.271	291.38	330.141	227.755	331.571	266.127	222.075	169.647	232.754	286.679	293.26	236.406	296.808	313.725	267.675	233.974	296.631	201.061	183.163	210.733	242.159	446.072	353.647	358.657	296.534
NDUFB2	968.435	841.668	848.201	847.993	787.005	802.644	764.215	665.356	742.937	755.526	749.375	843.75	716.197	803.974	752.94	712.057	725.003	718.554	693.389	733.542	838.839	790.392	1032.45	963.883	924.903	855.531
NUDC	1314.96	1397.87	1462.95	1346.91	1244.9	1350.54	1312.65	1172.83	1041.28	1156.38	1261.74	1386.7	1238.73	1319.79	1461.59	1261	1320.95	1286.12	1288.96	1272.36	1199.95	1403.44	1283.95	1500.49	1247.59	1139.45
MAEA	1931.85	1873.1	2205.67	2231.13	1579.97	2026.83	1629.13	1807.83	1802.74	1552.62	1781.07	1726.04	1693.22	1711.69	1930.33	1492.08	1727	2110.69	1560.67	1878.76	1520.14	1747.32	1189.97	1556.27	1417.16	1656.8
ICAM1	725.698	737.788	687.38	612.531	2693.7	1058.4	907.168	1036.64	809.236	1752.12	1478.71	816.1	2115.44	973.99	807.38	1093.7	1153.08	1741.24	1731.3	1122.99	2283.28	1741.02	1135.7	1672.29	1111.94	1246.7
STRN4	1997.13	2160.2	2539.42	2190.79	4014.92	3438.03	2460.77	3482.06	2871.33	3047.97	2675.96	3256.02	3255.6	2713.53	2817.99	2581.6	4121.29	3664.52	3773.43	3126.22	3433.1	3304.7	1466.61	2688.61	2084.11	2277.63
IRAK3	2033.13	2327.06	3482.73	3102.17	3875.4	3547.2	2060.68	6801.03	8107.96	2046.76	1667.79	3531.68	4411.46	2315.87	2738.63	1071.75	12400.6	4435.55	3485.42	3452.54	5551.68	3433.43	657.857	5281.28	2818.9	7677.07
LYZ	23835	18173.1	50037.8	50202.8	32567.7	29711	13686.6	24034.4	21838.6	17645.9	10031.2	16300.2	24311.4	5745.97	14673.1	9279.75	22585.3	42022	13080.9	12535.1	34873.2	20744.6	11809.7	134042	43145.7	73198.4
SI	0	0	0	0	0	0	0	0	0.974983	0	0	0	0	0	0	0	0	0	0	0	0	0	0	0	0	0
MUL1	574.197	512.035	607.834	513.736	1219.86	631.804	788.49	688.778	592.79	815.562	614.313	633.441	592.323	676.222	809.226	726.696	1047.11	707.845	853.151	558.381	833.724	925.424	998.036	614.699	715.258	986.763
TFAP4	452.829	447.417	351.039	363.073	392.31	636.859	623.959	434.607	541.116	653.004	596.014	411.401	593.196	463.942	583.159	626.318	334.698	593.262	483.633	528.15	405.098	491.519	336.208	295.636	269.25	268.773
PDCD7	713.98	583.196	740.987	689.097	859.744	965.397	750.729	830.177	673.713	669.629	763.317	843.75	659.494	845.278	1023.3	771.657	912.812	759.247	762.945	882.028	645.497	785.89	663.151	604.658	516.918	473.192
SPG21	2080.84	2307.43	2764.22	2391.67	3148.02	2761.74	2461.67	3040.51	2782.6	2666.51	2357.92	2745.75	2842.98	2481.08	2377.85	2426.85	3619.77	3345.4	3146.33	2652.31	3750.23	3004.03	2248.89	3485.15	3002.85	3043.57
FETUB	0	0	0	0	0	0	0	0	0	0	0	0	0	0	0	0	0	0	0	0	0	0	0	0	0	0
DNAJB11	1491.57	1161.48	1356.6	1171.55	2448.06	1450.62	1892.56	1295.15	1136.83	1667.15	1616.38	1642.25	1685.37	3133.29	1844.52	1917.64	2024.97	1558.12	1762.82	1401.29	1994.8	1833.74	1670.45	2050.48	2097.47	2253.66
LEPREL1	38.503	62.9819	35.4498	47.7511	39.3503	32.3484	10.7889	43.3739	33.1494	54.494	6.97093	5.02731	25.298	7.68434	5.53632	12.5473	14.6889	32.1261	20.6495	9.78055	16.3676	18.0044	5.29462	20.0809	10.2767	31.5461
THPO	0	0.817947	0	0	0	0	1.79815	0	0	0	0	0	0	0	0	0	0	0	0	0	0	0	0	0	0	0
CHRD	0	2.45384	1.72926	3.29318	1.19243	1.01089	0	0	0	0	0.871366	0.837885	0.872347	0	0	0	0	0	1.08682	0.889141	0	1.80044	0	1.11561	5.13835	1.26185
FLT3LG	1508.31	1539.38	948.498	1155.08	794.16	1490.05	1671.38	910.853	981.808	1925.76	1292.24	1195.66	1443.73	927.884	1403.46	1693.88	497.325	1718.75	1068.34	1247.47	920.677	1530.37	1526.17	1298.57	1607.28	870.673
RAB11FIP3	1169.32	948.819	1026.31	924.56	1478.62	1272.71	1873.68	1258.71	1250.9	1437.16	1557.13	1473.84	1146.26	1309.22	1309.34	1449.21	1115.31	1154.4	1422.64	1383.5	1285.88	1453.85	951.708	773.115	867.353	962.788
GNPTG	1120.77	1234.28	1354.01	1220.95	1502.46	1284.84	1269.5	1321.17	1345.48	1269.06	984.644	1331.4	1348.65	1190.11	1213.38	864.716	1284.23	1362.15	1393.3	1143.44	1697.12	1246.8	759.778	1521.69	1122.22	1422.1
ZNF268	346.527	319.817	346.716	312.852	279.029	237.558	353.337	255.906	350.019	299.255	376.43	326.775	302.704	328.506	366.32	372.236	288.532	311.623	251.055	351.211	201.526	348.384	479.163	286.711	385.376	282.653
GOLGA3	2672.61	2176.56	2528.18	2627.96	3076.48	2981.11	3613.39	3529.77	3918.46	3293.65	4040.52	3352.38	3592.32	4312.84	4501.03	3529.96	3104.61	3295.07	3163.72	3299.6	3007.55	3731.4	2258.16	2194.4	2682.22	2757.13
PABPC4	5079.89	4479.08	3963.46	4426.85	8035.8	6421.15	5260.5	5151.09	4415.7	7029.72	5378.07	3458.79	6308.81	5818.97	5566.77	5554.26	4073.03	6162.86	5637.32	5113.45	6798.69	5310.39	4697.65	4475.81	4737.56	4426.55
CD209	24.2736	59.7101	46.69	69.1567	29.8108	57.6206	26.9723	84.1454	98.4733	41.5632	8.71366	53.6246	68.043	35.5401	35.0634	27.1857	56.6573	86.7405	58.6881	47.1245	62.4015	70.217	7.94193	107.098	27.7471	103.471
CERS4	525.65	548.843	555.092	442.932	789.39	763.22	628.454	551.716	540.141	468.279	653.524	629.251	480.663	670.459	612.686	711.012	604.344	684.286	736.861	694.419	610.716	687.767	592.998	580.115	392.57	368.459
MCOLN1	594.286	534.119	651.93	499.74	1083.92	964.386	540.345	811.96	751.712	680.713	477.509	824.478	786.857	584.01	669.895	546.852	1132.1	743.184	1077.03	1021.62	1069.01	765.185	322.972	944.918	613.519	601.9
USP48	2529.48	2458.75	2535.09	2600.79	3279.19	2941.68	2882.44	2787.21	2947.37	2697.91	2689.91	2674.53	2658.91	3343.65	2955.47	2685.12	2548.53	2677.18	2725.73	2465.59	2802.95	2809.58	2369.34	2973.09	2774.71	2841.68
EFNB1	236.04	292.825	321.642	291.446	348.19	411.431	220.274	302.75	203.771	253.074	170.788	299.963	248.619	216.122	296.193	174.616	311.615	266.647	397.775	373.439	431.695	311.475	100.598	278.901	253.834	119.875
PDPR	1980.39	1674.34	1264.95	1504.98	1377.26	1872.16	1110.36	2832.32	3216.47	1367.89	1151.95	1442.84	1215.18	2614.6	1768.85	1530.77	2070.09	1929.71	1523.72	1344.38	2325.22	1512.37	1335.57	765.306	1672.02	1984.88
AARS	1398.66	1419.96	1633.28	1449	714.267	982.582	1072.6	943.817	956.458	813.715	1146.72	1276.94	889.793	2081.5	1665.51	1178.4	1049.21	908.098	936.835	1227.9	842.931	1187.39	1031.13	1282.95	1420.24	1073.83
GLG1	7092.93	6091.25	7000.04	7201.36	6177.99	6093.63	7307.69	6894.72	7275.32	6506.02	7362.17	7742.89	7436.75	8642	7781.3	6630.19	7543.81	6720.78	7355.57	7468.79	6916.33	7959.73	5632.15	7181.15	7937.72	7552.15
KIF4A	33.4809	23.7205	28.5328	29.6386	20.2713	22.2395	47.651	10.4097	5.8499	8.31264	65.3524	111.439	45.362	257.425	72.8949	74.238	47.2144	4.28348	44.5595	39.1222	14.3216	73.8179	33.0914	60.2427	87.3519	68.1397
TNRC6A	2300.97	2294.34	2101.91	2434.48	2257.27	2491.84	2833.89	2404.65	3115.07	2752.41	2697.75	2320.1	2687.7	2532.95	2491.34	2755.17	2252.65	2653.62	2322.53	2512.71	2469.46	2607.93	2500.39	1953.43	2420.16	2377.32
FCGBP	2807.37	1328.35	598.323	700.624	661.8	488.258	1979.77	693.983	823.861	1141.6	953.274	1627.17	920.326	484.114	1652.59	1368.7	305.32	962.713	711.865	805.562	556.498	857.008	1248.21	465.208	1027.67	392.434
PLEKHG2	1205.31	1374.15	1061.76	1081.81	2015.21	1568.9	2036.41	1839.05	1728.65	2942.67	2350.95	2019.3	3220.7	2354.29	2135.17	2314.97	1665.09	2062.5	1733.47	2032.58	2081.75	2623.24	1146.29	1820.67	1713.13	1751.44
DLL3	4.18511	2.45384	0.864629	0	1.19243	3.03266	4.49538	6.07235	1.94997	6.46538	7.84229	4.18942	3.48939	0.960543	3.69088	3.13682	0	3.21261	1.08682	3.55657	2.04595	9.9024	1.32366	5.57803	3.08301	1.26185
NAT14	85.3763	57.2563	58.7948	46.9278	128.783	74.8056	137.559	90.2178	83.8485	103.446	114.149	89.6537	81.1282	85.4883	134.717	138.02	110.167	100.662	146.72	91.5815	130.941	105.326	82.0666	116.023	75.0199	95.9003
PITPNM2	2061.59	1577	1098.94	1376.55	1712.33	2104.67	1770.28	1789.61	1669.17	2705.3	1840.32	1735.26	2029.95	1371.66	1885.12	2520.96	2465.64	1766.94	1611.75	1632.46	1550.83	2108.31	1645.3	1025.24	735.812	1039.76
EXOC1	1034.56	1158.21	1152.55	1118.03	918.173	1293.94	983.59	1286.47	1471.25	1075.1	1081.37	1358.21	1288.46	1091.18	1146.02	996.462	1417.48	1083.72	1103.12	1341.71	1114.02	1109.97	1033.77	1147.96	1174.63	1043.55
RBM27	1993.79	1683.34	1765.57	1702.57	2146.38	1888.34	2284.55	2045.51	2154.71	2232.4	2429.37	1959.81	2200.06	2434.02	2464.59	2278.37	2078.48	2200.64	2225.8	2390.01	1962.07	2298.26	2492.44	1816.21	2345.14	2092.14
POU4F3	0.837022	0.817947	1.72926	1.64659	2.38486	0	3.59631	0.867479	0	3.69451	3.48546	1.67577	0.872347	0	0	2.09121	1.04921	1.07087	3.26045	0	2.04595	3.60087	1.32366	4.46242	1.02767	3.78554
OSBPL8	5495.89	4536.33	5328.71	5101.96	6099.29	4987.72	6538.98	8144.76	8301.98	6093.16	6685.12	7807.41	6812.15	6265.62	6566.08	6134.57	6794.68	6997.07	5867.72	6939.75	7020.68	6499.58	5109.31	7467.86	6300.64	5584.93
DTX2	340.668	480.135	616.481	467.631	668.955	680.327	609.574	547.379	614.239	449.806	552.446	806.045	608.026	614.747	752.017	563.581	769.07	594.333	617.312	704.2	676.186	594.144	378.565	486.404	413.123	421.456
NLRC4	442.785	439.238	1014.21	812.592	301.685	962.364	310.181	818.032	738.062	185.649	223.941	676.173	346.322	328.506	565.628	177.753	1888.58	798.869	564.058	776.22	608.67	471.714	108.54	707.294	425.455	446.693
PUS7	188.33	184.856	204.917	147.37	124.013	136.47	180.714	128.387	152.097	195.809	190.829	175.118	184.937	224.767	202.998	219.577	156.332	154.205	119.55	204.502	117.642	194.447	206.49	131.641	191.147	143.85
LAMB4	0.837022	0	0	2.46988	0	0	0	0	1.94997	1.84725	1.74273	0	0	0	0	0	2.09842	1.07087	0	1.77828	1.02297	0	2.64731	2.23121	1.02767	1.26185
NRCAM	240.225	214.302	60.524	105.382	42.9276	24.2613	69.2289	56.3861	56.549	120.071	36.5974	66.1929	119.511	52.8299	47.9815	54.3715	16.7873	159.56	145.633	96.9164	7.16082	55.8135	66.1828	45.7398	54.4665	41.6409
LAMB1	31.8068	31.8999	31.1266	41.1647	25.0411	21.2286	64.7335	48.5788	81.8986	77.5846	60.9956	97.1946	82.0006	63.3958	33.2179	76.3292	35.6731	54.6144	41.299	91.5815	54.2177	54.0131	48.9753	31.237	22.6087	32.808
SLC26A4	12.5553	16.3589	8.64629	12.3494	3.5773	7.07621	4.49538	4.33739	7.79987	5.54176	5.2282	7.54096	13.0852	4.80271	8.30448	3.13682	8.39367	5.35435	7.60771	2.66742	5.11487	3.60087	21.1785	11.1561	13.3597	5.04738
SLC26A3	1.67404	3.27179	7.78166	7.40965	1.19243	10.1089	5.39446	1.73496	3.89993	3.69451	9.58503	3.35154	1.74469	8.64489	4.6136	6.27363	2.09842	2.14174	2.17363	3.55657	6.13785	1.80044	2.64731	0	2.05534	1.26185
DLD	1292.36	1110.77	1371.3	1364.2	1320.02	1105.91	1072.6	1127.72	1054.93	967.96	1090.95	1248.45	1174.18	1439.85	1162.63	1056.06	1543.39	1097.64	1391.12	1336.38	1152.89	1043.35	1436.17	1290.76	1511.7	1550.81
WDR7	1209.5	804.042	1028.04	1052.17	825.163	934.06	948.526	997.6	1041.28	890.376	998.585	1097.63	972.666	1276.56	1168.16	1115.66	1248.56	898.46	1099.86	1491.98	999.446	1016.35	1061.57	805.467	1227.04	1141.97
TXNL1	996.056	940.639	1005.56	967.371	1329.56	1297.98	1261.4	1080.88	1076.38	1193.33	1187.67	1181.42	1243.09	1260.23	1226.3	1109.39	1295.77	1320.38	1291.14	1142.55	1328.84	1285.51	1103.93	1197.04	1171.54	1169.73
IL5RA	35.1549	60.5281	64.8472	35.4017	64.3913	79.8601	9.88984	69.3983	89.6984	125.613	17.4273	15.9198	61.9366	76.8434	73.8176	23.0033	27.2794	46.0474	54.3408	56.0159	94.1137	46.8113	13.2366	37.9306	29.8024	29.0224
ABCC6	25.1107	85.8844	113.266	136.667	139.515	227.45	77.3206	189.978	158.922	96.9808	65.3524	93.8431	120.384	87.4094	112.572	41.8242	146.889	208.82	51.0804	49.7919	142.193	89.1216	21.1785	141.682	59.6049	121.137
CMTM6	5089.93	4490.53	5769.67	5344.83	7883.17	5210.11	6514.71	6716.02	5853.8	6187.37	6010.68	6968.69	7586.8	5355.99	6076.11	4928.99	9141.76	7311.9	8904.28	7052.67	11586.2	6079.17	4738.69	8833.37	9644.68	7520.6
ITGA6	5020.46	3908.15	2566.22	3287.41	1805.34	2961.9	4485.49	2321.37	2792.35	5286.84	3409.65	1711.8	4698.46	2641.49	3043.13	4412.46	1963.07	3706.28	2023.65	2342	1466.95	3771.01	5106.66	3002.1	2922.69	2984.26
RAPGEF4	10.0443	14.723	1.72926	4.93977	4.76973	13.1415	8.09169	6.07235	10.7248	16.6253	10.4564	3.35154	11.3405	8.64489	9.2272	8.36485	3.14763	18.2048	7.60771	2.66742	1.02297	14.4035	25.1495	7.80924	5.13835	7.57107
	436.926	503.037	645.013	741.788	1032.65	692.458	608.675	1120.78	986.683	638.226	568.131	537.084	927.304	574.405	586.85	266.629	642.116	1143.69	885.755	540.598	1136.52	622.951	164.133	927.068	630.989	808.843
SMPX	0	0	0	0	0	0	0	0	0	0	0	0	0	0	0	0	0	0	0	0	0	0	1.32366	0	0	0
FH	826.141	791.773	740.123	722.853	611.718	661.12	683.298	704.393	584.99	589.274	686.636	824.478	683.92	914.437	781.544	719.377	733.397	644.664	692.302	681.971	665.957	695.869	751.836	902.525	864.27	781.082
SEL1L3	3771.62	3877.89	3563.14	3269.3	3993.46	3438.03	4711.16	3809.97	4023.76	2971.31	5777.16	4117.37	2410.29	9347.04	7259.96	5634.77	1742.74	3497.46	4682	4273.21	2667.92	4709.04	6479.29	3523.08	5371.63	5017.1
TF	6.69618	4.90768	8.64629	4.93977	5.96216	5.05443	11.688	12.1447	9.74983	2.77088	3.48546	15.0819	4.36173	15.3687	3.69088	8.36485	3.14763	4.28348	11.955	8.00227	9.20677	8.10196	6.61828	10.0405	8.22136	8.83292
CDV3	6913.8	6986.9	7141.84	6757.6	14602.5	10230.2	10380.7	9525.78	7861.29	10940.4	9353.24	9222.6	11747	12950	10441.5	10404.8	12148.8	11191.7	12861.4	9635.62	12429.1	11449.9	10304.7	10492.3	10714.5	9332.61
MYO15A	16.7404	43.3512	21.6157	41.988	64.3913	69.7512	56.6418	44.2414	48.7492	65.5775	42.6969	40.2185	67.1707	31.6979	42.4451	50.1891	41.9684	49.26	54.3408	55.1268	36.8271	49.512	30.4441	41.2774	33.9131	37.8554
ALKBH5	2112.64	2077.59	2305.97	1802.19	4366.69	3481.49	3574.73	3077.81	2630.5	3406.33	3217.08	2925.89	2872.64	3364.78	3428.83	3317.71	3161.27	3726.63	3584.32	3004.41	3814.67	3630.58	2655.25	2515.69	2406.8	2459.34
APOH	0	0	0.864629	0	0	0	0.899076	0	0	0	0	0	0	0	0	0	0	0	0	0	0	0	0	0	1.02767	0
NLRP1	13155.5	15372.5	13553.1	13809.9	14061.2	14907.5	12682.4	13277.6	14009.5	16929.1	12715.8	12479.5	15594.1	12936.6	12263	12172.9	9990.57	14912.9	11524.6	11745.6	13470.5	13163.9	9540.91	12974.5	9576.86	11191.3
PITPNM3	16.7404	24.5384	12.1048	23.0522	17.8865	26.2831	23.376	16.4821	18.5247	41.5632	23.5269	16.7577	32.2768	15.3687	11.9954	24.0489	16.7873	14.9922	21.7363	16.8937	17.3906	17.1041	5.29462	7.80924	10.2767	25.2369
SPAG7	841.207	1076.42	1021.13	945.142	914.596	865.319	795.683	753.839	763.412	963.342	806.885	868.886	876.708	993.201	819.376	700.556	1046.06	993.768	945.53	826.012	1001.49	1007.34	769.044	1033.05	900.239	850.484
ORC6	147.316	136.597	83.869	97.972	147.862	161.742	239.154	137.062	160.872	215.205	184.73	237.121	294.853	253.583	190.08	209.121	152.135	175.623	206.495	162.713	218.917	221.454	153.544	122.717	146.957	172.873
ZFHX4	0.837022	5.72563	0	3.29318	1.19243	1.01089	0.899076	0	0	22.167	0.871366	1.67577	2.61704	0.960543	0.92272	2.09121	1.04921	0	21.7363	3.55657	0	17.1041	2.64731	2.23121	23.6364	0
SLC17A6	0	0	0	0	0	0	0	0	0	0	0	0	0	0	0	0	0	0	0	0	0	0	0	0	0	0
CPA1	0	0	0	0	0	0	0	0	0	1.84725	0.871366	3.35154	7.85112	0	0	0	0	0	0	1.77828	0	0	0	0	2.05534	0
ZC3HC1	251.107	224.935	234.314	247.812	180.057	184.992	188.806	217.737	214.496	228.136	180.373	244.662	179.703	234.372	231.603	247.809	229.777	222.741	190.193	214.283	179.021	239.458	260.76	233.162	232.253	162.778
ESR1	115.509	110.423	101.162	104.558	89.4324	128.383	136.66	127.519	194.997	131.155	178.63	122.331	183.193	243.978	113.495	167.297	97.5764	144.568	93.4662	182.274	108.435	153.937	111.187	81.4392	127.431	93.3766
RGS17	5.02213	5.72563	9.51092	13.996	13.1168	11.1198	0	1.73496	0.974983	4.61813	5.2282	2.51365	0.872347	3.84217	3.69088	1.04561	3.14763	3.21261	5.43408	6.22399	10.2297	1.80044	1.32366	1.11561	6.16602	1.26185
ANGPT2	5.02213	3.27179	3.45852	9.05624	13.1168	8.0871	8.99076	12.1447	17.5497	17.5489	9.58503	14.244	16.5746	23.053	3.69088	10.4561	7.34446	10.7087	9.78134	12.448	13.2987	7.20175	14.5602	6.69363	5.13835	6.30923
TMEM101	451.155	521.032	583.625	529.378	422.121	474.106	416.272	411.185	345.144	388.847	373.816	438.214	422.216	422.639	463.206	395.239	518.309	522.585	419.511	400.114	458.293	472.615	422.246	537.722	487.116	455.526
CD200	159.034	230.661	212.699	227.229	110.896	281.027	112.385	633.259	598.64	70.1956	492.322	125.683	76.7665	194.03	520.414	416.151	38.8207	163.843	108.682	334.317	55.2406	204.35	550.641	111.561	80.1583	69.4015
CCDC80	3.34809	0.817947	0.864629	2.46988	2.38486	3.03266	12.5871	1.73496	3.89993	5.54176	6.97093	1.67577	6.97877	2.88163	7.38176	17.7753	0	2.14174	3.26045	7.11313	2.04595	1.80044	7.94193	2.23121	1.02767	7.57107
CMA1	0.837022	0	0	0	0	0	1.79815	0.867479	0.974983	0	0	0	0	0.960543	0	2.09121	1.04921	0	2.17363	1.77828	1.02297	0	0	0	0	0
PSME1	6192.29	6689.17	6399.12	6153.3	5944.27	5284.92	6617.2	5772.2	4644.82	5007.9	5096.62	6662.86	6722.3	6134.03	5903.56	5780.11	7793.52	5566.38	6769.78	5686.06	6365.97	6017.06	7199.36	9236.1	8214.17	8652.47
PPP2R3C	658.736	599.555	715.048	795.302	690.418	604.51	580.803	675.766	593.765	463.66	472.28	678.687	676.941	614.747	609.918	574.038	766.972	625.388	754.25	687.306	551.383	515.825	566.525	941.571	820.081	754.584
HAUS4	250.27	306.73	364.873	321.085	196.751	187.014	157.338	179.568	139.423	198.58	168.174	197.741	172.725	119.107	202.998	134.883	172.07	239.875	210.842	167.159	158.561	132.332	259.436	380.422	302.135	314.2
JPH4	15.9034	32.7179	54.4716	39.5181	56.0443	43.4681	36.8621	57.2536	56.549	37.8687	22.6555	106.411	51.4684	43.2244	22.1453	19.8665	102.822	108.158	61.9485	36.4548	35.8041	73.8179	14.5602	100.405	56.5218	83.2818
MYH7	0.837022	0.817947	0.864629	0.823294	3.5773	0	0	0.867479	0	0	0	0.837885	0.872347	0	0	0	0	0	0	0	0	0	0	0	0	1.26185
CEBPE	35.992	31.8999	55.3363	41.988	27.4259	36.3919	10.7889	39.0365	26.3245	26.7852	13.9419	30.1638	10.4682	19.2109	40.5997	31.3682	132.2	88.8822	20.6495	30.2308	22.5054	18.9046	13.2366	52.4335	10.2767	13.8803
SLC7A8	20.0885	44.1691	54.4716	153.956	132.36	121.306	28.7704	48.5788	39.9743	84.9736	11.3278	29.326	44.4897	27.8557	122.722	64.8276	64.0017	161.701	33.6913	36.4548	37.8501	50.4122	33.0914	45.7398	40.0791	41.6409
OSGEP	1391.13	1468.22	1341.04	1365.85	1025.49	1265.63	1109.46	1086.95	1110.51	916.237	1227.75	1049.87	1303.29	846.238	1003	1075.93	766.972	1236.86	954.225	1409.29	860.322	1034.35	1004.65	1240.55	998.895	863.102
SLC22A17	205.907	261.743	183.301	166.305	163.363	375.039	258.035	148.339	199.872	431.334	239.626	59.4898	318.406	91.2516	131.026	289.633	56.6573	321.261	132.592	152.043	129.918	219.653	150.897	128.295	92.4903	82.02
RNF31	992.708	950.455	1065.22	1017.59	905.056	1236.31	1175.09	1189.31	1143.66	864.514	873.98	1503.17	1097.41	1202.6	1134.02	1202.45	1627.32	988.413	1362.87	1386.17	1148.8	1271.11	945.09	1214.89	986.563	1068.78
SCFD1	964.25	974.175	1057.44	1170.72	1147.12	1164.54	1170.6	1137.26	1302.58	856.202	1168.5	1317.15	1221.29	1602.19	1373.01	1029.92	1438.47	1098.71	1158.55	1148.77	1159.03	1398.04	844.492	1188.12	1156.13	1047.33
G2E3	693.054	593.012	596.594	637.23	722.614	683.36	847.829	659.284	922.334	827.569	854.81	799.342	864.495	863.528	716.031	965.094	727.102	686.428	773.813	849.13	752.909	775.088	844.492	594.618	696.76	686.444
HECTD1	3215	3015.77	3297.7	3568.16	4110.31	3383.44	4084.5	3711.07	4329.9	3858.91	3798.28	3452.08	3920.33	4084.23	3616.14	4054.86	3681.67	3771.61	3656.05	3721.95	3839.22	4063.58	4377.33	3192.86	3954.47	4352.1
HNRNPC	13119.5	10930.2	13097.4	11559.9	13375.5	11820.3	14475.1	11848	10956.9	13268.8	13446	13348.3	13436.8	13231.5	13468.9	13539.5	13941.9	13588.3	14222.1	12917.4	14093.5	13953.4	15972.6	15361.9	16311.2	15385.7
RPGRIP1	66.9618	107.151	103.755	107.852	94.2021	162.753	50.3483	85.8804	103.348	100.675	54.0247	63.6792	139.575	76.8434	86.7357	39.733	78.6907	206.678	47.8199	55.1268	71.6082	114.328	54.2699	172.919	78.1029	103.471
SUPT16H	3846.95	3669.31	4075.86	3495.71	2762.87	3114.54	3410.2	3238.3	3178.45	2781.04	3817.45	3672.45	3369.87	4192.77	3915.1	3564.47	3843.25	3129.08	3728.87	4042.04	2932.87	3394.72	3326.35	3135.97	3743.8	3043.57
TOX4	1694.13	1786.4	1965.3	1616.95	1987.78	2055.13	1752.3	1774.86	1546.32	1619.12	1951.86	1987.46	1786.57	1932.61	1920.18	1778.58	2240.06	1783	1985.61	1901.87	1764.63	1919.27	1806.79	1955.66	1874.47	1833.46
GEMIN2	158.197	160.318	155.633	125.964	133.552	153.655	92.6049	107.567	125.773	108.988	93.2362	124.007	95.0858	131.594	139.331	96.1957	100.724	109.229	117.376	112.032	83.8839	89.1216	133.689	136.104	126.403	109.781
TGM1	44.3622	63.7999	59.6594	79.8596	28.6184	75.8165	47.651	45.9764	49.7241	46.1813	39.2115	90.4915	46.2344	52.8299	59.0541	38.6874	59.8049	38.5513	59.7749	47.1245	71.6082	57.614	22.5021	42.393	59.6049	64.3541
TINF2	2002.99	2174.92	2476.3	2119.16	2610.23	2439.27	2359.18	2153.95	1822.24	1751.2	2323.06	2636.82	1995.06	2385.99	2763.55	2411.17	2846.5	2419.1	2708.35	2443.36	2391.72	2257.75	2444.79	2377.36	2275.26	2140.09
DAZL	4.18511	0.817947	2.59389	10.7028	3.5773	5.05443	0	6.93983	13.6498	5.54176	4.35683	2.51365	0	11.5265	16.609	15.6841	0	0	1.08682	6.22399	8.1838	5.40131	35.7387	0	0	0
TBL1Y	0.837022	0.817947	0	0.823294	0	0	0	0	0	0	0	0	0	0	0	0	0	0	0	0	0	0	0	0	1.02767	0
SEMA6A	99.6056	105.515	88.1922	119.378	56.0443	102.1	97.1002	72.8682	120.898	85.8972	81.9084	111.439	125.618	80.6856	95.0402	103.515	58.7557	138.142	64.1221	93.3598	69.5623	78.319	87.3613	79.208	60.6325	78.2344
TRPM7	3172.31	2634.61	2765.08	2776.97	3208.84	3028.62	3643.06	3452.56	3469.96	3141.25	3195.3	3455.44	3456.24	3165.95	3343.94	3236.15	3325.99	3223.32	3165.9	3220.47	3003.45	3335.31	3724.77	3178.36	3409.81	3386.79
TYRO3	1.67404	4.08974	4.32315	3.29318	11.9243	3.03266	3.59631	4.33739	1.94997	7.38901	3.48546	1.67577	3.48939	0	2.76816	1.04561	10.4921	4.28348	2.17363	4.44571	1.02297	3.60087	0	5.57803	1.02767	2.52369
WDR76	263.662	220.846	217.887	205	174.095	210.264	329.062	209.93	178.422	290.019	345.932	372.859	292.236	529.259	284.198	334.594	220.334	209.891	234.752	305.865	170.837	242.159	228.992	234.277	285.692	228.394
CAPN3	69.4728	111.241	165.144	117.731	58.4292	115.241	79.1187	116.242	179.397	80.3555	104.564	78.7612	128.235	72.0407	83.9675	98.2869	77.6415	78.1735	68.4694	134.26	96.1596	99.9242	88.6849	70.2832	72.9646	95.9003
SNAP23	2101.76	2036.69	2143.42	2105.99	1616.94	1976.28	1434.93	2013.42	1833.94	1567.39	1924.85	1751.18	1870.31	1459.06	1851.9	1238	2113.11	1787.28	2109.51	1961.45	2499.13	1492.56	1499.7	2395.21	1951.55	1695.92
TBX15	0.837022	0	0	0	1.19243	0	1.79815	0	0	1.84725	3.48546	2.51365	0	3.84217	0	0	0	0	4.34726	5.33485	0	0	0	0	2.05534	2.52369
PHGDH	122.205	155.41	120.183	102.089	116.858	83.9036	112.385	72.8682	44.8492	114.53	223.941	124.007	136.086	313.137	152.249	168.343	44.0668	133.859	114.116	80.9119	45.0109	187.245	115.158	79.208	99.684	122.399
COL9A3	43.5252	59.7101	78.6813	23.8755	67.9686	57.6206	83.6141	112.772	89.6984	70.1956	96.7216	5.02731	72.4048	73.9618	93.1947	101.424	147.938	92.0949	139.112	83.5793	35.8041	7.20175	79.4193	36.815	70.9092	90.8529
[truncated: 60,070 more rows]
