# Supplementary material for: Exploration of Potential Integrated Models of N6-Methyladenosine Immunity in Systemic Lupus Erythematosus by Bioinformatic Analyses
Source: Front Immunol. 2022 Feb 7;12:752736. doi: 10.3389/fimmu.2021.752736 (PMC8859446; doi:10.3389/fimmu.2021.752736)
Supplement: Supplementary Table 10 — Datas of the gene expression of GSE20864. [file Table_10.xlsx]

## Sheet: Sheet1
Tag	GSM443427	GSM443428	GSM443429	GSM443430	GSM443431	GSM443432	GSM443433	GSM443434	GSM443435	GSM443436	GSM443437	GSM443438	GSM443439	GSM443440	GSM443441	GSM443442	GSM443443	GSM443444	GSM443445	GSM443446	GSM443447	GSM443448	GSM443449	GSM443450	GSM443451	GSM443452	GSM443453	GSM443454	GSM443455	GSM443456	GSM443457	GSM443458	GSM443459	GSM443460	GSM443461	GSM443462	GSM443463	GSM443464	GSM443465	GSM443466	GSM443467	GSM443468	GSM443469	GSM443470	GSM443471	GSM521769	GSM521770	GSM521771	GSM521772
39142	NA	0.17	NA	0.19	NA	NA	-1.06	0.31	-0.17	-0.89	-0.9	-0.24	0.53	-0.17	NA	-0.9	0.01	-0.18	-0.37	-0.3	0.42	NA	-0.15	1.39	0.29	NA	-0.61	NA	-0.24	NA	0.79	0.86	0.7	0.03	0.15	0.59	NA	-0.28	-0.2	NA	0.37	NA	NA	0.58	NA	-0.24	NA	NA	0.3
39143	-0.35	0.1	-0.11	0.4	0.25	0.23	0.15	0.1	0.12	0.15	-0.16	0.04	0.05	0.04	0.12	-0.23	0.41	0.08	-0.09	0.12	-0.3	0.08	-0.18	0.58	-0.41	-0.3	0.63	0.12	0.15	0.18	-0.18	-0.35	-0.03	0.08	0.03	0.36	-0.18	0.21	-0.01	-0.15	0.31	-0.19	0.09	0.27	0.15	-0.18	0	0.65	0.6
39145	-0.41	-0.06	-0.16	0.19	-0.52	-0.15	-0.33	-0.65	0.03	-0.06	-0.27	-0.37	-0.18	0.02	-0.27	0.32	0.09	-0.18	-0.18	-0.2	NA	-0.47	-0.39	-0.51	NA	NA	-0.12	-0.18	-0.08	-0.3	-0.29	-0.48	-0.75	0.08	-0.03	-0.24	-0.08	0.03	0.09	0.26	-0.01	-0.04	0.37	-0.22	-0.07	-0.77	-0.84	-0.88	0.03
39146	-0.24	0.24	0.11	-0.05	0.83	-0.22	0.61	0.22	-0.26	-0.18	0.22	0.11	-0.34	-0.27	0.51	-0.51	-0.38	0	0.1	0.54	0.1	-0.1	-0.22	-0.22	0.01	-0.14	0.54	1	0.31	0.17	0.48	0.6	0.22	0.53	-0.07	0.24	-0.06	0.09	-0.2	0.17	-0.02	0.16	-0.18	0.28	0.39	-0.29	0.3	0.33	0.27
39147	0.41	-0.22	-0.07	-0.21	0.07	-0.05	0.01	0.1	-0.07	-0.07	0	-0.2	-0.13	-0.11	0.07	-0.2	-0.03	-0.14	0.06	-0.18	0.15	-0.17	-0.28	-0.38	0.02	-0.05	-0.02	-0.33	-0.19	-0.25	-0.39	0.51	-0.34	-0.09	-0.02	0.02	-0.08	0.27	0.11	-0.02	-0.28	-0.15	0.11	-0.17	0.12	NA	NA	NA	1.59
39148	NA	0.33	-0.04	0.14	-0.83	0.03	0.64	0.45	-0.44	0.18	-0.03	0.02	-0.21	-0.31	0.49	-0.5	-0.23	0.12	0.48	0.82	0.14	-0.16	-0.59	1.08	-0.07	-0.02	0.19	0.8	NA	0.43	0.03	0.42	0.41	0.48	-0.2	0.58	0.31	0.38	-0.12	0.06	0.48	0.03	-0.77	0.36	0.17	-0.21	NA	NA	NA
39149	0.04	-0.43	-0.21	-0.37	-0.94	-0.08	-0.74	-0.65	0.36	-0.03	-0.22	0.28	-0.03	0.28	0	-0.09	0.49	-0.2	-0.1	0.32	0.02	-0.03	0.28	0.38	0.15	-0.11	-0.04	-0.09	0.25	0.14	0	0.34	-0.07	-0.01	0.46	0.19	0.02	-0.06	0.51	0.44	0.07	0.19	-0.23	0.2	-0.24	-0.42	-0.78	-0.12	0.13
39150	0.06	-0.87	-0.01	-0.48	0.07	-0.58	-0.8	-0.69	-0.58	-0.75	-0.65	-0.65	-0.25	-0.85	-0.42	1.05	-0.49	-0.67	-0.76	-0.86	-1.08	-0.07	-0.12	-0.13	-0.95	-0.84	-0.83	-0.91	-0.91	-0.68	-0.02	-0.76	-0.48	-0.77	-1.35	-0.54	-1.26	-0.77	-0.63	-1.01	-0.3	-0.84	-0.13	-0.92	-0.5	-1.38	-0.89	-0.93	-1.11
39326	0.1	0.07	0.32	-0.06	-0.24	-0.08	-0.08	0.09	0.42	0.15	0.04	-0.29	0.16	0.44	0.13	-0.61	0.17	-0.08	-0.14	0.71	0.17	-0.07	0.01	0.23	-0.03	0.06	-0.12	-0.31	-0.21	-0.25	0.18	0.3	0.24	-0.18	0.45	0.06	0.17	0.42	0.29	-0.18	0.02	-0.29	0.22	-0.11	0.15	-0.5	-0.23	0.55	0.67
39327	-0.45	0.18	-0.23	0.14	-0.09	-0.18	-0.15	0.28	-0.54	0.1	-0.55	-0.41	0.17	-0.28	-0.01	-0.19	-0.53	-0.26	0.2	-0.17	0.21	-1	-0.13	-0.45	0.41	0.03	-0.18	0.39	-0.04	0.04	0.36	-0.01	-0.12	-0.01	0.06	0.22	-0.06	-0.34	-0.08	-0.23	0	-0.32	-0.16	0.08	0.31	-0.31	0.24	0.21	-0.19
39328	-0.36	0	0.065	-0.115	0.32	-0.11	0.16	0.035	0.025	0.1	-0.085	0.01	-0.04	-0.055	0.085	0.075	0.05	-0.1	-0.145	-0.16	-0.34	0.31	-0.04	-0.24	-0.345	-0.21	0.025	-0.11	-0.08	0.095	-0.28	0.395	-0.51	-0.02	-0.105	-0.175	-0.02	-0.22	0.09	0.175	-0.555	-0.08	0.045	0.045	-0.585	0.205	0.315	-0.09	0.09
39329	0.22	-0.03	0.64	0.17	-0.4	0.77	0.04	-0.17	0.27	0.12	0.1	0.19	0.2	-0.2	0.65	0.12	0.12	0.16	-0.33	0.03	-0.5	0.19	0.02	0.3	-0.42	-0.22	0.15	-0.33	0.19	-0.07	-0.41	-0.27	-0.44	0.09	0.04	0.35	-0.09	0.11	0	-0.25	-0.03	-0.02	-0.06	-0.01	-0.59	0.08	NA	NA	-0.14
39330	0.73	-0.02	0.25	0.09	0.42	0.17	0.18	0	0.19	-0.14	0.11	0.1	0.25	0.04	0.06	-0.02	0.2	0.01	-0.09	-0.23	0.2	0.61	0.37	-0.12	-0.07	0.31	0.18	0.16	0.02	-0.1	0.7	0.45	0.06	0.29	-0.12	0.16	-0.26	0.18	0.11	-0.29	-0.1	-0.08	0.43	0.06	0.76	-0.01	-0.22	-0.35	-0.12
39331	-0.22	0.01	-0.19	-0.07	0.17	-0.03	0.08	0.22	-0.15	0.16	-0.01	-0.45	0.09	-0.03	0.04	-0.49	-0.18	-0.14	0.05	0.44	-0.09	0.09	-0.03	0.12	-0.07	-0.15	0.08	-0.03	0.03	-0.17	-0.14	0.05	0.04	-0.08	-0.09	0.13	-0.3	0.3	-0.06	-0.01	-0.08	-0.2	-0.18	-0.13	-0.02	-0.12	0.15	0.26	0.13
39332	0.55	0.25	0.51	0.64	0.11	-0.15	-0.03	0.65	-0.92	0.08	-0.39	-0.23	-0.71	-0.45	0.1	-0.66	-0.78	-0.27	0.21	0.07	0.28	-0.37	-0.17	-0.29	0.29	0.04	0.12	0.95	0.26	0.4	0.53	0.59	0.65	0.18	-0.09	-0.08	0.07	0.3	-0.26	-0.03	0.19	-0.06	-0.24	0.51	0.51	-0.79	0.64	0.98	-0.69
39333	-0.06	-0.29	0.01	-0.01	0.28	-0.04	-0.05	0.14	-0.36	0.1	-0.31	0.04	-0.28	-0.08	-0.05	0.36	0.06	-0.1	-0.03	0.1	-0.16	0.47	0.01	-0.14	0.06	0.01	-0.13	-0.26	-0.12	-0.01	0.18	0.18	-0.03	-0.18	-0.19	-0.75	-0.08	-0.23	-0.21	-0.32	0.07	-0.2	0.04	0.46	0.09	-0.54	0.28	0.83	-0.96
39334	-0.183333	0.126667	-0.266667	0.07	-0.273333	-0.153333	0.02	-0.09	0.06	0.116667	-0.06	-0.355	-0.0766667	0.126667	-0.196667	0.07	0.0133333	0.146667	-0.0466667	0.196667	-0.0366667	-0.11	-0.103333	0.206667	0.0366667	-0.113333	-0.153333	-0.153333	-0.0366667	-0.1	-0.0366667	-0.09	-0.11	0.0666667	0.0533333	-0.18	-0.0566667	0.18	0.0133333	-0.0766667	0.0833333	-0.163333	0.206667	-0.08	-0.143333	-0.37	0.0933333	-0.436667	-0.0733333
39335	0.423333	-0.0933333	-0.17	0.06	-0.41	0.33	-0.0866667	-0.0566667	-0.00333333	0.0333333	0.1	0.0766667	-0.06	6.94e-18	0.223333	0.286667	0.173333	0.156667	-0.0266667	0.216667	-0.11	0.303333	0.17	0.213333	-0.31	-0.17	-0.0866667	0.0233333	0.0466667	0.00666667	-0.296667	0.0133333	-0.0766667	-0.0766667	0.15	0.16	0.0933333	0.106667	-0.256667	-0.0533333	-0.313333	0.11	0.29	-0.0833333	0.0233333	-0.783333	0.03	0.18	-0.68
39336	-0.22	0.06	-0.44	0.32	-0.05	0.4	0.09	0.71	-0.14	0.11	0.08	0.14	-0.4	-0.08	0.37	0.03	0.1	0.4	-0.07	0.03	-0.07	0.12	-0.27	0.22	-0.07	-0.23	0.14	0.36	-0.13	-0.08	-0.05	0.58	0.28	0.32	-0.06	-0.15	0.08	0.18	0.12	0.56	0.37	0.23	0.9	-0.22	0.68	0.86	0.27	NA	0.61
39339	-0.01	0.11	0.2	0.04	-0.12	0.15	0.07	-0.13	0.18	0.01	0.07	0.2	0.7	0.06	-0.15	0.28	0.07	0.28	0.36	-0.02	0.17	0.35	0.34	0.37	0.38	0.36	0.13	-0.06	0.27	0.42	0.19	0.02	0.38	0.26	0.2	-0.09	0.23	0.35	-0.03	0.12	0.07	0.2	0.08	0.08	0.01	0.39	0.37	0.55	0.65
39417	-0.33	-0.1	-0.31	0.41	0.73	0.07	0.03	0.13	0.06	-0.17	0.09	0.12	-0.48	-0.07	0	-0.54	0.19	0.12	0.02	0.14	-0.29	0.24	0.04	-0.16	-0.08	-0.13	0.29	0.01	0.01	0.16	-0.01	0.32	-0.13	-0.03	-0.02	0.19	-0.2	0.29	-0.03	-0.37	-0.58	-0.06	-0.18	-0.07	0.18	0.2	-0.07	-0.64	-0.04
A2M	NA	NA	0.02	0.12	-0.3	0.3	-0.58	0.08	0.28	0.23	NA	NA	0.28	-0.46	0.2	0.43	-0.19	0.18	0.13	0.67	-0.61	0.14	0.31	0.71	-0.74	-0.09	NA	0.39	NA	NA	-0.08	0.04	0.13	0.71	0.22	-0.65	NA	0.27	-0.22	NA	-0.22	0.76	0.04	-0.17	-0.99	-0.34	-0.12	NA	0.34
A4GALT	0.24	-0.29	0.11	0.18	-0.12	0.09	-0.2	0.23	0.22	-0.12	-0.18	-0.47	-0.28	0.08	0.23	0.38	0.18	-0.2	-0.2	-0.04	-0.48	0.05	-0.25	-0.3	NA	-0.19	-0.25	-0.46	-0.41	-0.36	-0.32	-0.09	-0.14	-0.39	0.09	-0.4	-0.34	-0.29	-0.01	-0.25	-0.02	-0.52	0.02	-0.26	-0.28	-0.34	-0.45	-0.09	-0.16
A4GNT	0.45	0.12	0.01	0.2	0.97	0.06	0.11	0.04	0.38	0.07	0.11	0.25	0.12	0.25	0.14	0.23	0.3	0.11	-0.07	-0.26	-0.32	0.57	-0.16	0.32	-0.35	-0.23	0.03	0.02	0.15	0.11	0.38	-0.16	-0.26	0.07	0.03	0.14	-0.14	0.05	0.16	0.54	-0.11	0.06	0.27	0.04	0.38	0.86	-0.49	-0.15	-0.12
AAAS	0.38	-0.15	-0.3	-0.46	-0.08	-0.39	0.05	-0.27	-0.07	-0.04	-0.14	-0.27	-0.1	-0.23	-0.25	0.41	-0.02	-0.25	-0.11	0.02	-0.16	-0.04	-0.04	-0.26	-0.2	-0.35	-0.22	-0.22	-0.04	-0.15	-0.47	-0.66	-0.4	-0.34	-0.15	-0.09	-0.33	-0.33	-0.22	-0.12	-0.28	-0.16	-0.08	-0.42	-0.08	-0.09	-0.17	-0.13	-0.11
AACS	-0.37	0.2	NA	-0.3	-0.2	0.23	0.05	-0.19	0.3	-0.18	0.19	0.27	-0.13	0.1	-0.37	-0.16	0.22	0.12	-0.51	0.33	-0.66	0.08	0.29	0.39	-0.05	-0.04	0.11	-0.29	-0.06	0.18	0.26	0.53	-0.26	-0.08	0.4	0.12	0.16	-0.56	0.14	0.2	0.52	0.03	0.46	-0.11	-0.04	-0.45	0.98	NA	NA
AADAC	NA	0.2	-0.74	-0.19	-0.3	-0.11	0.2	0	0.15	0.33	0.19	0.21	-0.23	-0.17	0.23	-0.03	0.06	0.22	0.13	-0.04	-0.2	0	0.16	0.31	NA	-0.28	-0.03	-0.06	NA	0.26	-0.4	0.36	0.3	0.27	0.18	0.21	-0.13	-0.18	0.08	-0.15	-0.13	0.22	-0.17	0.02	-0.39	NA	NA	NA	NA
AADACL1	-0.01	-0.39	-0.33	-0.6	-0.11	-0.52	-0.74	-0.62	0.01	-0.24	-0.51	-0.46	-0.35	-0.41	-0.47	0.7	-0.11	-0.41	-0.46	-0.35	-0.68	-0.18	-0.1	-0.23	-0.82	-0.5	-0.75	-0.92	-0.48	-0.49	-0.52	-0.66	-0.47	-0.59	-0.38	-0.56	-0.46	-0.87	-0.61	-0.7	-0.29	-0.7	-0.27	-0.7	-0.67	-0.12	-0.53	0.07	-0.31
AADAT	-0.23	-0.03	-0.52	0.35	-0.49	0.27	-0.24	-0.43	-0.39	-0.07	-0.4	0.01	-0.27	-0.05	-0.08	0.02	-0.49	-0.35	-0.23	-0.07	0.09	0.02	-0.51	-0.04	-0.1	-0.34	-0.3	0.35	-0.03	0.01	0.13	0.46	0.43	0.08	-0.11	0.16	-0.12	0.27	0.01	0.36	0.06	0.12	0.23	-0.06	0.81	-0.11	NA	NA	-0.2
AAK1	-0.28	-0.53	-0.4	-0.04	0.31	0.03	-0.47	-0.03	-0.27	-0.36	-0.26	-0.35	-0.3	-0.29	-0.19	0.28	-0.24	-0.35	-0.37	-0.19	-0.44	0.19	-0.17	-0.13	-0.55	-0.34	-0.38	-0.69	-0.12	-0.45	0.09	0.14	-0.11	-0.44	-0.72	-0.67	-0.91	0	-0.54	-0.98	-0.13	-0.56	-0.16	-0.51	-0.07	-0.28	-0.15	0.05	-0.18
AAMP	0.16	0.058	-0.104	0.186	0.626	0.104	0.188	0.012	-0.008	-0.00666667	-0.104	0.12	-0.132	-0.054	0.028	0.044	0.09	0.124	-0.05	-0.214	0.21	0.168	-0.058	-0.04	0.032	0.165	0.206	0.216	0.036	0.148	0.17	0.224	0.176	0.202	0.156	0.128	0.032	0.178	-0.054	0.036	-0.026	0.062	2.78e-18	0.096	0.142	0.102	0.318	0.105	-0.086
AANAT	-0.13	-0.04	0.2	0.18	-0.16	0.13	0.01	0.28	-0.08	0.07	0.06	0.15	-0.33	0.18	0.55	0.52	0.34	-0.05	-0.6	0.29	-0.42	0.5	-0.45	0.56	-0.38	-0.45	-0.02	0	-0.08	-0.29	0.19	0.75	-0.08	0.04	-0.08	-0.53	0.11	-0.07	0.17	0.32	1	-0.19	0.01	-0.2	-0.38	0.38	NA	NA	-0.56
AARS	-0.71	0.13	0.37	0.26	-0.37	-0.51	0.33	-0.19	0.13	0.07	0.22	0.06	-0.03	0.16	-0.63	-0.45	0.12	0.03	-0.83	-0.46	NA	-0.51	-0.24	-0.29	-0.66	-0.88	0.23	0.33	-0.15	0.05	0.04	-0.85	0.19	0.09	-0.08	0.44	-0.01	0.3	0.32	0.3	0.31	0.11	NA	0.2	0.59	0.27	0.08	NA	0
AARS2	-0.22	-0.13	-0.24	0.14	0.41	0	0.09	-0.1	-0.35	-0.16	-0.04	-0.29	-0.06	-0.04	0.04	-0.48	-0.07	-0.16	0.01	0.06	0.09	-0.15	-0.07	-0.26	0.1	-0.03	-0.02	-0.04	-0.11	-0.14	0.03	-0.17	0.21	-0.06	-0.01	-0.08	-0.14	0.19	0	0.05	0.42	-0.07	-0.14	-0.11	0.13	0.04	-0.08	0.58	-0.08
AARSD1	0.86	-0.16	0.08	-0.06	-0.56	0.05	-0.36	-0.09	0	0.03	-0.1	-0.05	0.07	-0.12	0.17	0.33	-0.14	0.05	-0.03	-0.02	-0.04	0.16	0.04	0.38	0.07	0.06	-0.11	-0.16	-0.05	0.04	-0.18	0.28	-0.05	-0.05	0.03	-0.02	-0.02	-0.06	-0.1	-0.11	-0.08	0.06	-0.25	-0.12	-0.08	-0.22	-0.27	-0.23	-0.15
AASDHPPT	0.3	0.095	0.27	0.065	0.435	-0.08	-0.08	0.18	-0.17	0.28	0.24	0.085	-0.105	-0.24	-0.05	0.155	-0.32	-0.005	0.32	-0.345	0.05	-0.005	-0.11	-0.45	0.235	0.14	0.095	0.77	0.315	0.675	0.28	0.2	-0.13	0.465	-0.005	0.355	-0.065	-0.23	-0.125	0	-0.04	0.61	-0.145	0.445	-0.37	-0.11	-0.55	-0.58	0.47
AASS	NA	NA	-0.04	-0.28	-0.11	-0.36	NA	NA	-0.24	NA	NA	NA	-0.5	-0.26	0.13	NA	-0.04	0.15	0.58	0.14	0.3	0.07	-0.17	0.63	-0.36	-0.03	NA	0.12	NA	NA	0.1	0.9	0.31	NA	0.63	0.26	NA	0.67	-0.19	NA	NA	NA	-0.2	NA	NA	-0.33	-0.65	NA	NA
AATF	0.19	-0.15	0.22	0.25	0.16	-0.32	0.12	0.26	-0.67	0.34	0.18	-0.27	-0.64	-0.02	0.21	-0.48	-0.57	-0.09	-0.15	-0.05	-0.13	-0.19	-0.53	-0.25	-0.01	-0.04	0.42	0.49	0	-0.26	-0.11	0.19	0.05	0.01	-0.4	0.43	0.04	0.58	-0.06	0.13	0.26	0.17	0.08	-0.18	0.48	-0.32	-0.55	-0.74	-0.4
AATK	-0.1	-0.22	-0.06	-0.17	0.34	-0.18	0.13	0.26	-0.17	0.03	-0.05	-0.19	-0.15	-0.1	-0.01	0.4	0.04	-0.11	-0.05	-0.34	-0.18	0.16	-0.19	-0.25	-0.24	-0.12	-0.11	0.05	-0.18	0.01	0.02	-0.19	-0.36	-0.2	-0.05	-0.08	-0.18	-0.23	0.02	-0.12	-0.13	-0.04	0.27	-0.1	-0.06	-0.24	-0.32	-0.76	-0.07
ABAT	0.025	0.005	-0.11	-0.045	0.225	0.01	0.025	0.28	-0.005	-0.08	0.15	0.105	-0.22	0.045	0.14	-0.1	0.015	-0.16	0.035	0.265	-0.285	0.22	0.01	0.17	-0.2	-0.13	0.07	-0.14	0.04	0.065	-0.155	0.065	0.03	-0.055	-0.165	-0.17	-0.08	-0.145	-0.06	-0.145	0.15	-0.145	-0.125	0.27	-0.54	-0.245	-0.03	0.535	-0.145
ABCA1	0.38	0.025	0.13	0.425	0.23	0.41	0.255	0.075	-0.19	0.155	0.205	-0.105	0.315	0.095	0.475	-0.315	0	-0.035	0.11	-0.075	0.205	0.325	-0.17	-0.18	0.47	0.185	-0.14	0.16	0.06	0	0.075	0.46	0.185	0.02	0.065	0.245	-0.205	-0.05	0.065	-0.36	0.1	0.05	0.04	-0.485	0.27	0.51	-0.62	-0.28	-0.12
ABCA10	-0.175	-0.08	-0.56	-0.065	-0.125	-0.095	0.095	0.05	0.325	-0.045	0.11	-0.025	-0.195	0.095	-0.12	-0.215	0.23	-0.01	-0.095	0.785	-0.245	0.225	0.145	0.68	-0.34	0.01	-0.005	-0.48	-0.145	-0.26	0.04	0.03	-0.435	-0.075	-0.09	0.305	-0.395	-0.25	0.145	-0.19	0.32	-0.105	0.13	-0.365	-0.54	0.09	0.73	0.345	0.095
ABCA12	NA	0.02	NA	0.45	NA	-0.22	-0.47	-0.09	0.14	0.13	0.01	-0.15	-0.07	-0.06	-0.23	-1.15	-0.2	-0.09	-0.63	-0.86	0.56	0.34	-0.43	-0.52	0.3	-0.2	-0.13	-0.62	-0.3	0.04	0.48	-0.46	-0.35	0.22	0.07	0.54	-0.52	-0.53	0.31	0.46	-0.22	-0.57	NA	0.19	0.07	0.37	NA	NA	0.34
ABCA13	-0.54	0.035	0.05	-0.14	-0.305	-0.105	0	-0.38	0.185	0.24	-0.075	0.28	0.245	-0.14	-0.215	-0.005	0.14	0.17	0.02	0.49	-0.095	0.38	0.565	0.53	-0.09	0.18	0.18	-0.185	-0.07	0.125	-0.025	0.38	0.055	-0.06	0.215	0.05	0.325	-0.165	0.01	-0.2	-0.15	0.005	-0.12	0.13	-0.37	-0.135	0.34	NA	0.63
ABCA2	0.386667	-0.113333	-0.0533333	0.146667	-0.193333	-0.0133333	-0.126667	0.0466667	-0.0833333	-0.0566667	-0.07	-0.14	0.1	-0.0933333	0.123333	0.186667	-0.0833333	-0.0633333	-0.03	-0.0533333	-0.0233333	-0.0366667	0.0266667	-0.0433333	-0.0433333	-0.00333333	-0.0433333	0.01	-0.16	-0.08	-0.0466667	0.0666667	-0.0833333	-0.0766667	0.00333333	-0.06	-0.0166667	-0.0466667	-0.123333	-0.206667	-0.183333	-0.146667	-0.0333333	-0.18	-0.203333	-0.07	-0.146667	-0.0266667	-0.03
ABCA3	-0.27	-0.18	0.1	-0.07	0.29	0.04	-0.35	-0.1	0.12	-0.08	0.64	-0.1	-0.16	0.09	-0.06	-0.1	0.19	-0.24	-0.12	0.29	-0.11	-0.05	-0.21	-0.05	-0.16	-0.29	-0.11	-0.16	-0.39	-0.36	-0.25	-0.32	-0.02	-0.83	-0.07	0.04	-0.05	-0.11	-0.07	-0.44	0.11	-0.31	0.16	-0.56	-0.03	-0.15	-0.06	-0.33	-0.44
ABCA4	-0.08	-0.07	0.41	0.09	-0.13	-0.34	-0.12	-0.27	0.16	-0.08	0.21	0.02	0.24	0.02	0.06	0.12	-0.09	0.13	0.14	-0.68	0.12	0	0.45	0.46	0.1	0.53	-0.08	0.01	0.15	0.04	0.03	0.54	0.09	0.33	-0.1	0.16	0.04	-0.12	-0.22	0.13	-0.19	0.1	-0.67	0.04	0.22	-0.49	0.51	NA	NA
ABCA5	0.02	-0.11	0.68	-0.07	0.12	0.07	0.03	0	0.63	-0.06	0.21	0.67	0.63	-0.16	-0.06	0.16	-0.2	0.33	0.03	-0.23	-0.31	0.85	0.81	0.65	-0.09	0.41	0.02	-0.5	-0.02	0.13	0.4	0.16	-0.01	0.04	0.19	0.38	-0.11	-0.39	-0.22	-0.94	0.06	0.1	0.22	0.09	-0.8	-0.13	-0.05	-0.24	0.14
ABCA7	0.09	0	-0.11	0.04	0.45	0.05	-0.05	0	0.02	0.09	-0.13	-0.18	0.01	0.19	0.24	-0.03	0.14	0.07	0.17	-0.15	0.09	-0.41	-0.18	0.08	0.02	-0.04	-0.02	-0.2	-0.11	-0.06	-0.18	0.02	-0.21	-0.21	0.06	0.26	-0.19	-0.36	0.1	0.28	-0.64	-0.03	-0.2	-0.17	-0.1	-0.23	-0.02	1.24	-0.3
ABCA8	-0.23	0.03	0.33	-0.07	0.17	0.12	0.1	0.35	0.21	-0.08	0.07	0.05	-0.21	0.03	0.2	-0.17	0.4	0.09	-0.51	0.74	-0.89	0.66	-0.02	0.59	-0.82	-0.35	-0.09	-0.34	-0.25	-0.12	-0.12	0.12	0.17	-0.17	-0.1	-0.15	-0.06	-0.05	-0.06	-0.23	0.09	-0.01	0.39	-0.32	-0.35	-0.42	-0.32	-0.51	0.29
ABCA9	-0.05	-0.32	-0.01	-0.43	-0.41	-0.63	0.51	-0.21	-1.37	0.22	-0.01	-0.52	-0.21	-0.76	-0.13	-0.27	-1.27	-0.04	0.37	0.31	0.28	-0.54	-0.43	-1.15	0.43	0.02	-0.51	0.39	-0.24	-0.37	-0.25	-0.13	-0.64	-0.27	-0.79	0.19	0.07	-0.26	-0.77	-0.73	0.17	0.19	-0.21	-0.05	0.12	0.05	0.26	-0.16	-0.17
ABCB1	-0.12	0.02	-0.35	0.06	0.04	-0.13	0.41	0.22	0.2	0.17	0.19	0.11	-0.43	0.15	-0.07	0.08	0.26	0.21	-0.38	0.07	-0.41	0.25	-0.41	0.17	-0.44	-0.41	0.37	0.2	-0.1	0	-0.37	-0.29	-0.63	0.32	0.05	0.29	-0.13	-0.09	0.27	-0.14	0.62	0.17	-0.14	-0.01	-0.79	-0.03	-0.2	0.09	NA
ABCB10	-0.23	-0.25	0.01	-0.12	-0.14	0.05	-0.15	0.17	0.09	-0.07	0.09	-0.04	-0.16	0.12	-0.22	-0.27	0.07	-0.13	-0.39	0.1	-0.42	0.13	-0.16	0.03	-0.36	-0.3	-0.06	-0.05	-0.22	-0.34	-0.1	-0.04	-0.23	-0.3	-0.08	-0.16	-0.06	-0.23	0.15	-0.01	0.22	-0.17	-0.24	-0.13	0.11	-0.35	-0.37	0.01	0.04
ABCB11	NA	NA	-0.23	-0.2	0.03	-0.4	NA	-0.12	0.05	-0.23	NA	NA	-0.06	-0.43	-0.12	-0.41	-0.05	0.21	0.58	0.46	0.06	-0.01	0.4	-0.6	-0.29	-0.11	NA	0.26	NA	NA	-0.28	-0.06	0.63	NA	0.12	0.13	NA	0.78	-0.26	NA	0.01	NA	-0.13	NA	NA	0.21	-0.09	NA	0.23
ABCB4	-0.3	0.08	NA	-0.11	0.15	0.27	-0.14	-0.4	-0.48	0	-0.28	-0.14	-0.72	-0.26	0.23	-0.03	-0.41	-0.28	-0.18	0.14	-0.2	-0.49	-0.6	-1.25	-0.29	-0.32	-0.07	-0.07	-0.12	-0.18	-0.19	-0.12	0.14	-0.14	-0.37	-0.03	-0.02	0.09	0	-0.14	-0.29	-0.08	0.18	0.03	0.04	0.99	NA	-0.16	-0.79
ABCB5	0.36	0.18	0.02	-0.08	0.1	-0.61	-0.01	-0.07	-0.01	0.07	-0.13	-0.15	-0.12	-0.25	0.02	0.59	-0.29	0.02	0.14	-0.45	0.33	-0.65	0.07	-0.31	0.52	-0.12	-0.23	0.17	0.03	0.09	0.27	-0.45	-0.28	0.14	0.14	0.25	0.05	-0.15	-0.17	0.05	-0.34	0.16	-0.74	-0.01	0.14	0.15	-0.6	-0.55	0.15
ABCB6	-0.27	0	0.09	0.26	0.15	0.39	0.11	0.3	0.09	0.01	-0.12	-0.28	-0.31	0.15	0.34	-0.61	-0.06	0.15	-0.27	0.05	-0.05	0.04	-0.18	0.09	-0.14	-0.12	0.2	0.26	-0.07	0.03	0.33	0.45	0.37	-0.07	0.28	-0.15	-0.24	-0.25	-0.16	0.19	-0.06	-0.23	0.2	0.09	0.35	0.24	0.18	0.35	0.09
ABCB7	0.2	-0.07	0.41	-0.15	-0.34	0.43	-0.38	0.37	-0.59	-0.41	-0.1	0.65	-0.38	-0.24	0.48	-0.4	-0.32	-0.14	-0.33	0.09	-0.15	0.23	-0.05	0.02	-0.69	-0.41	0.13	-0.35	0.17	0.01	0.33	0.87	0.36	-0.36	-0.87	-0.18	-0.18	0.22	-0.79	-1.02	0.29	0	0.12	0.36	0.56	0.35	0.07	-0.12	0.03
ABCB8	0.23	-0.25	-0.31	0.01	-0.37	0.06	-0.03	-0.03	0.15	0.28	0.05	-0.04	0.35	-0.01	0.11	-0.37	0	0.07	0.25	0.59	0.18	0.22	0.17	0.28	0.18	0.36	0.08	0.1	0.12	0.04	-0.12	0.18	0.26	-0.06	0.23	0.08	0.03	0.12	-0.1	0.03	0.04	0.09	0.24	-0.03	-0.08	0.06	0.11	-0.13	0.21
ABCB9	0.19	-0.04	0.33	0.42	0.53	0.3	0.55	0.52	-0.16	0.27	0.05	0.29	-0.26	0.02	0.26	0.13	0.09	0.14	0.04	0.08	-0.49	-0.18	-0.29	0.08	-0.09	-0.17	0.35	0.44	0.07	0.07	-0.36	-0.11	-0.55	0.37	0	0.59	0.11	-0.2	0.19	-0.1	0.2	-0.02	0.04	0.06	-0.12	0.1	0.57	0	0.47
ABCC1	0.16	0.12	0.055	0.235	-0.09	0.325	-0.02	0.35	0.275	0.005	0.3	0.06	-0.36	0.24	0.22	-0.07	0.11	-0.095	-0.25	0.56	-0.485	0.195	-0.39	0.425	-0.36	-0.385	0.03	-0.005	0.225	-0.09	0.19	0.07	0.245	0.065	0.06	-0.04	-0.13	0.45	-0.025	0.125	0.16	-0.09	0.66	0.005	0.4	-0.1	-0.045	0.145	0.095
ABCC10	0.01	0.13	0.02	0.29	0.34	0.02	0.13	0.14	0.15	-0.04	0.06	0.09	0.54	0.07	0.21	-0.6	-0.12	0.18	0	0.33	0.4	0.11	0.39	-0.34	0.22	0.18	0.22	0.17	0.03	0.07	0.83	-0.11	0.1	0.19	0.03	0.1	-0.22	0.37	0.18	0.12	0.35	0.04	0.24	0.16	0.17	0.25	-0.27	0.62	0.6
ABCC11	-0.39	-0.16	-0.47	0.34	0.6	0.19	0	-0.02	0.32	-0.17	-0.26	0.22	0.18	0.2	0.18	-0.13	0.58	0.22	-0.21	-0.14	-0.1	0.4	0.09	-0.33	0.05	0.06	0.04	-0.36	-0.23	-0.11	-0.22	0.78	-0.4	-0.2	0.21	-0.16	-0.09	-0.72	0.13	0.1	-0.18	0.04	-0.14	-0.08	-0.85	-0.62	-0.5	-0.75	0.5
ABCC12	-0.14	-0.17	0.22	0	0.24	0.16	-0.09	0.15	0	-0.08	-0.13	-0.02	0.15	-0.1	0.13	-0.14	-0.19	0.07	0.04	-0.35	0.19	-0.09	-0.32	-0.02	0.22	0.19	-0.19	-0.2	0.22	-0.04	0.1	0.15	0.24	-0.17	0.08	-0.31	-0.03	0.25	-0.17	-0.35	0.09	-0.24	0.17	-0.26	-0.45	-0.58	-0.09	0.22	0.42
ABCC13	0.21	-0.08	-0.53	0.08	0.07	0.23	0.02	-0.33	0.29	-0.14	0.09	0.02	-0.04	-0.24	0.15	0.95	-0.06	-0.01	-0.06	0.27	-0.17	-0.38	0.07	-0.23	-0.26	-0.06	0.24	-0.17	-0.15	0.21	-0.45	-0.26	-0.01	-0.04	-0.26	-0.4	-0.01	-0.21	0.09	0.1	-0.63	-0.04	0.27	-0.23	-0.92	NA	-0.28	-0.24	-1.03
ABCC2	0.665	-0.19	-0.245	0.03	-1.085	-0.22	-0.315	-0.205	-0.175	-0.29	-0.01	0.28	0.315	-0.295	-0.335	0.395	-0.31	0.025	-0.025	-0.68	0.22	0.115	0.07	-0.04	0.095	-0.145	-0.18	-0.37	0.33	0.185	0.14	-0.395	0.125	0.06	-0.27	0.085	-0.11	-0.005	-0.505	-0.615	-0.365	0.01	0.015	0.42	0.175	0.115	0.27	0.24	-0.16
ABCC3	-0.17	-0.21	-0.14	-0.11	0.57	-0.11	-0.16	-0.01	-0.23	-0.21	-0.14	-0.41	-0.19	0.06	-0.13	-0.56	-0.02	-0.32	-0.29	0.45	-0.23	0.14	-0.12	-0.2	-0.16	-0.24	-0.16	0.11	-0.09	-0.18	0.03	0.08	0.21	-0.15	-0.13	-0.3	-0.22	0.15	-0.23	-0.07	0.17	-0.24	-0.22	-0.05	-0.08	-0.02	0.04	0.28	0.09
ABCC4	-0.3	-0.1	NA	-0.1	-0.16	NA	-0.01	0.82	-0.16	NA	-0.05	-0.84	0.11	0.16	0.78	-0.4	-0.42	-0.23	-0.12	-0.38	-0.13	NA	-0.43	-1.08	0.38	-0.17	0.23	NA	-0.04	0.11	-0.73	0.15	NA	-0.29	-0.33	0	-0.42	1.02	-0.13	0.54	2.7	-0.43	NA	0.41	NA	0.75	1.44	NA	NA
ABCC5	-0.03	-0.3	-0.05	-0.02	-0.1	0.09	0.15	0.03	-0.43	-0.05	-0.07	-0.44	-0.56	-0.24	-0.18	0.09	-0.4	-0.37	0.05	-0.26	-0.1	-0.44	-0.35	-0.37	-0.06	-0.25	0.01	0.15	-0.15	0.08	-0.31	-0.36	0.03	0.11	-0.33	0.11	-0.39	0.22	-0.3	-0.03	-0.33	0.38	-0.32	0	0.03	-0.11	-0.19	-0.26	-0.54
ABCC6	0.23	-0.07	-0.22	-0.47	-0.26	-0.22	0.17	0.35	-0.26	NA	-0.12	0.18	-0.25	0.03	0.23	-0.33	0.06	-0.01	-0.26	0.18	-0.38	0	-0.42	-0.05	-0.06	-0.13	0.23	0.12	-0.01	0.12	0.06	0.16	0.04	0.08	0.02	0.01	-0.21	0.1	0.06	-0.31	-0.05	0.04	-0.02	-0.28	0.1	-0.41	0.13	NA	0.01
ABCC8	NA	-0.2	-0.44	0.09	-0.47	0.6	-0.24	0.31	0.07	-0.09	-0.1	-0.24	-0.4	0.12	-0.54	0.13	0.41	-0.15	-0.2	0.05	-0.16	-0.04	-0.27	0.15	-0.05	-0.27	-0.11	-0.05	-0.19	-0.03	0.1	0.3	0.3	0.1	-0.04	-0.08	-0.09	-0.02	0.13	0.62	0.26	-0.11	0.53	-0.2	0.53	-0.11	-0.87	NA	-0.33
ABCC9	0.14	0.12	0.075	1.12333	0.15	0.756667	0.266667	0.29	0.32	0.0266667	0.106667	0.24	-0.1	0.243333	0.31	-0.796667	0.206667	0.15	-0.26	0.275	-0.126667	0.24	0.025	0.225	-0.095	0.075	0.293333	0.21	0.0733333	0.156667	0.445	0.345	0.49	0.2	0.166667	0.15	0.0266667	0.45	0.363333	0.15	0.285	0.156667	0.06	0.226667	0.465	0.16	0.125	0.115	0.06
ABCD1	-0.05	0.16	0.33	0.15	0.1	0.39	0	0.16	0.15	0.12	0.21	0.12	0.09	0.05	0.25	-0.18	0.21	0.1	-0.5	0.13	-0.53	0.49	0.01	0.43	-0.52	-0.35	-0.04	-0.31	-0.23	-0.03	0.17	0.75	0.06	0.16	-0.11	-0.35	-0.07	0.05	0.17	-0.09	0.5	0.04	0.27	0.19	0.19	-0.12	-0.46	-0.54	0.11
ABCD2	NA	-0.34	NA	-0.13	-0.28	-0.03	0.25	0.14	0.43	0.25	NA	0.23	NA	-0.12	NA	0.24	-0.36	-0.03	0.06	NA	0.02	0.48	NA	1.16	0.21	0.02	NA	0.48	0.42	NA	0.44	NA	0	0.08	-0.06	0.52	-0.28	0.3	0.38	0.05	NA	0.36	NA	0.75	NA	0.48	NA	NA	NA
ABCD3	NA	0.24	-0.2	-0.01	-0.06	0.06	0.32	NA	0.23	0.2	0.02	NA	-0.49	0	0.36	NA	0.13	0.47	0.28	0.39	0.37	0.11	0.09	0.37	-0.61	-0.06	NA	0.37	NA	NA	-0.79	0.14	NA	0.03	0.6	0.1	0.15	0.34	0.1	NA	0.31	0.05	-1.06	NA	NA	-0.09	0.42	NA	NA
ABCD4	0.44	0.045	0.17	0.45	0.075	0.095	0.06	0.315	0.25	0.075	0.155	0.125	-0.65	0.14	0.185	-0.095	0.35	0.105	-0.255	0.125	-0.215	0.22	-0.26	-0.215	-0.385	-0.33	0.04	-0.15	-0.165	-0.095	-0.07	-0.165	0.09	-0.02	0.025	0.005	-0.24	0.41	0.035	0.12	0.475	-0.14	0.125	-0.06	0.265	-0.095	0.11	-0.03	0.155
ABCE1	NA	0.49	NA	-0.11	-0.22	0.04	0.12	0.58	-0.08	0.15	-0.13	-0.05	0.52	-0.44	0.57	-0.38	-0.25	-0.28	0.21	1.09	0.27	0.06	0.29	-0.35	0.16	-0.03	0.02	0.89	0.23	0.13	0.19	0.61	0.12	0.07	-0.12	0.39	0.75	0.62	0.09	0.46	0.22	-0.28	0.82	0.37	0	NA	NA	NA	NA
ABCF1	0.52	0.19	0.32	0.21	0.17	-0.07	0.35	0.67	-0.09	-0.02	-0.05	-0.11	-0.7	0.01	-0.19	-1.03	-0.37	0.05	-0.25	0.29	-0.17	0.18	0.22	0.18	0.05	0.13	0.4	0.42	-0.07	-0.02	0.11	-0.07	0.54	0.31	-0.05	0.48	-0.29	0.33	0.14	0.01	0.06	0.08	0.12	0.13	0.42	NA	0.8	-0.06	NA
ABCF2	-0.09	-0.12	0.54	-0.17	0.03	0.02	0	0.25	0.44	0.27	0.33	0.24	-0.47	0.15	0.01	-0.35	0.16	-0.06	-0.21	0.83	-0.33	0.38	0.24	0.67	-0.58	-0.04	0.15	-0.07	0.16	0.04	-0.37	0.33	-0.18	-0.06	-0.06	0.02	0.03	-0.32	0.1	0.34	0.34	0.04	0.36	0.18	-0.81	-0.26	-0.5	-0.36	0.16
ABCF3	0.07	0.08	0.38	0.26	0.52	0.12	0.38	0.15	-0.05	0.25	0.29	0.17	0.26	0.21	-0.03	-0.96	0.18	0.25	0.01	0.31	0.61	0.33	0.65	0.29	0.53	0.45	0.35	0.37	-0.05	-0.01	0.39	0.04	0.71	0.29	0.09	0.29	-0.05	0.58	0.23	0.14	0.33	0.26	-0.09	0.1	0.33	0.02	0.2	0.3	0.57
ABCG1	-0.38	-0.215	-0.13	-0.02	-0.2	-0.065	-0.045	0.015	-0.215	0.01	-0.035	-0.165	-0.205	-0.235	0.095	0.42	-0.02	-0.19	-0.27	-0.12	-0.415	-0.115	-0.365	-0.18	-0.455	-0.38	-0.135	-0.08	-0.225	-0.09	-0.085	-0.055	-0.14	-0.105	-0.305	-0.265	-0.365	-0.365	-0.245	-0.255	-0.43	-0.205	0.065	-0.175	-0.405	-0.18	-0.46	-0.41	-0.015
ABCG2	-0.21	-0.3	-0.21	-0.05	-0.54	0.19	-0.27	0.07	-0.3	0	-0.27	-0.38	-0.52	-0.13	-0.08	-0.45	-0.46	-0.47	-0.29	-0.5	-0.03	-0.38	-0.53	0.31	0.05	-0.42	-0.01	0.06	-0.05	-0.24	-0.35	-0.21	0.02	-0.18	-0.01	-0.19	-0.18	0.33	-0.18	0.13	0.21	-0.13	-0.04	0.18	0.18	-0.32	-0.16	NA	0.01
ABCG4	0.83	-0.16	0.11	0.14	0.35	0.02	-0.57	0.31	0.08	-0.06	-0.08	-0.09	-0.05	-0.14	0.22	0.11	-0.02	-0.34	-0.13	-0.11	-0.26	-0.05	-0.2	0.17	-0.45	-0.33	-0.32	-0.41	-0.09	-0.39	0.04	0.15	-0.16	-0.37	-0.09	-0.39	-0.09	-0.15	-0.23	-0.53	-0.29	-0.24	0.08	-0.14	0.07	-0.32	-0.29	-0.42	-0.28
ABCG5	0.5	0.14	0.51	0.26	-0.79	0.34	0.23	-0.17	0.09	0.02	0.09	0.26	0.33	-0.14	-0.11	0.73	-0.02	0.12	0.43	0.18	-0.1	-0.2	NA	0.33	-0.01	0.64	0.08	0.12	-0.05	0.13	0.03	0.18	0.54	-0.19	0.18	0.16	0.23	0.17	0.11	-0.2	-0.03	0.36	0.62	-0.16	0.51	0.82	1.4	NA	-0.99
ABCG8	0.76	0.01	0.21	-0.35	-0.01	0.2	-0.05	0.15	-0.12	0.02	0.04	0.25	0.09	-0.22	0.01	0.31	-0.28	-0.04	0.2	0.16	0.02	0.16	0.2	-0.62	-0.27	-0.1	0.12	-0.12	0.2	0.07	-0.13	-0.34	-0.29	0	-0.38	0.05	0.06	0.06	-0.27	-0.29	0.28	-0.1	-0.29	0.07	-0.87	0.2	-0.97	0.26	-0.18
ABHD1	0.14	-0.16	0.12	-0.27	-0.14	-0.03	-0.07	-0.06	0.04	0.04	-0.05	-0.15	-0.06	0.02	-0.04	0.18	0.01	0.13	-0.11	-0.27	0.01	-0.81	-0.23	-0.32	0.07	-0.22	-0.09	0.33	-0.18	-0.29	0.03	0.03	-0.27	0	0.15	0.09	0.24	0.1	-0.15	-0.2	0.05	0.01	-0.26	-0.39	-0.15	-0.13	-0.17	-1.05	0.08
ABHD10	0.37	0.06	0.02	0.14	0.25	0.22	-0.02	0.18	0.28	0.04	0.29	0.24	-0.26	0.06	-0.25	-0.73	0.33	0.1	0.01	0.58	-0.14	0.42	0.04	0.4	-0.24	-0.01	0.28	0.01	0.18	0.12	-0.24	0.34	0	0.24	-0.06	-0.01	-0.23	-0.17	0.06	-0.1	0.32	0.22	0.43	0.03	0.16	-0.35	-0.83	0.03	0.15
ABHD11	-0.26	-0.5	0.01	-0.65	-0.8	-0.56	-0.69	-0.33	-0.49	-0.57	-0.57	0	-0.12	-0.21	-0.31	0.74	-0.32	-0.61	-0.32	-0.54	-0.01	0	0.03	0.3	-0.05	-0.29	-0.3	-0.16	-0.12	-0.12	-0.11	-0.56	-0.57	-0.12	-0.72	-0.01	-0.22	-0.39	-0.32	-0.43	0.14	-0.25	-0.11	-0.22	0.09	-0.39	-0.52	-0.63	-0.48
ABHD12	0.07	-0.17	-0.535	0.145	-0.27	0.155	-0.415	-0.455	-0.18	-0.355	-0.135	0.205	-0.135	0.065	-0.315	0.06	-0.275	-0.02	-0.48	-0.385	-0.48	-0.18	-0.41	0.1	-0.49	-0.035	-0.255	-0.67	-0.105	-0.495	-0.385	0.06	-0.135	-0.335	0.055	-0.775	-0.01	-0.29	-0.27	-0.245	-0.07	-0.31	0.215	-0.135	0.21	0.24	0.16	1.01	-0.03
ABHD13	0.14	0.03	0.3	0.22	0.17	-0.73	-0.04	-0.01	-0.76	-0.21	0.06	0.07	-0.1	-0.3	0.42	0.46	-0.4	0.04	0.25	-0.06	0.63	-0.81	-0.08	-0.23	0.14	-0.34	0.05	0.26	0.21	0.39	0.14	-1.07	0.28	0.2	-0.01	0.25	0.21	0.03	-0.16	-0.18	0.22	-0.51	-0.32	0.2	-0.32	0.54	NA	-0.89	0
ABHD14A	-0.23	-0.29	-0.19	0.09	0.3	-0.12	0.02	-0.08	-0.32	0.02	-0.23	-0.41	-0.17	-0.12	-0.04	-0.34	-0.26	-0.22	-0.3	-0.13	-0.22	-0.36	-0.53	-0.17	-0.05	-0.29	-0.08	0.21	-0.12	-0.09	0.11	-0.28	0.28	-0.12	-0.17	-0.03	-0.26	0.32	-0.07	0.05	0.11	-0.33	-0.15	-0.2	0.53	-0.22	-0.09	-0.53	-0.16
ABHD2	-0.49	0.11	0.61	0.3	0.03	0.51	0.07	0.58	0.13	0.06	0.23	0.47	-0.14	0.17	0.17	-0.88	0.07	NA	-0.32	0.04	-0.76	0.27	-0.4	0.56	-0.26	-0.3	0.37	0.41	0.08	0.28	0.39	-0.01	0.24	-0.24	-0.03	0.01	0.08	0.14	-0.01	0.02	0.12	0.21	0.26	0.02	0.14	NA	NA	NA	NA
ABHD3	-0.36	-0.02	0.08	0.2	0.15	-0.07	-0.39	0.34	-0.8	-0.49	-0.31	-0.05	-0.55	-0.58	-0.12	-0.41	-0.79	-0.51	0.39	-0.27	0.02	-0.61	-0.49	-0.09	0.04	-0.18	-0.29	-0.24	-0.18	0.12	-0.28	0.33	-0.23	0.18	-0.79	-0.16	-0.06	-0.13	-0.59	-0.57	-0.27	-0.41	-0.41	-0.14	0.16	-0.3	-0.01	0.3	-0.8
ABHD4	0.16	-0.055	-0.015	0.04	-0.21	0.295	-0.28	0.04	0.065	-0.235	0.02	-0.12	0.005	0.12	0.035	-0.11	0.065	-0.115	-0.125	0.48	-0.255	-0.035	-0.09	0.27	-0.11	-0.075	-0.16	-0.37	-0.075	-0.175	0.045	0.485	0.06	-0.19	0.015	-0.27	-0.15	0.06	-0.015	-0.095	0.365	-0.125	0.105	-0.085	0.245	-0.115	0.02	0.41	0.155
ABHD5	0.8	-0.33	0.09	-0.09	0.05	0.11	0.21	0.41	-0.52	-0.34	-0.02	0.07	0.12	-0.48	0.54	-0.23	-0.4	-0.24	0.32	0.22	0	-0.52	-0.14	-0.57	-0.07	0	-0.03	0.47	-0.24	0.04	-0.32	0.22	0.35	0.15	-0.49	-0.02	-0.59	-0.04	-0.69	-0.5	-0.18	-0.18	0.31	-0.07	-0.87	0.54	-0.28	0.07	0.05
ABHD6	-0.24	0.1	-0.25	0.15	-0.45	0.32	-0.23	0.18	0.18	0.04	0.04	-0.04	-0.22	0.16	0.37	0.45	0.25	0.02	-0.1	-0.07	-0.34	-0.18	-0.21	0.01	-0.38	-0.3	0.1	-0.17	0.19	-0.03	0.2	0.07	-0.41	0.37	0.06	0.21	-0.05	-0.03	0.27	0.05	-0.31	-0.09	0.1	0.08	0.05	0.32	-0.87	-0.01	0.24
ABHD8	-0.13	-0.15	0.08	0.09	-0.97	0.35	-0.26	0.06	0.48	-0.16	0.04	0.03	-0.07	0.07	0.17	-0.13	0.26	0.19	-0.52	-0.01	-0.64	0.08	0	0.41	-0.63	-0.19	0.04	-0.33	-0.03	-0.08	0.16	0.01	-0.09	-0.08	0.16	-0.05	-0.12	-0.17	0.11	-0.34	-0.35	-0.19	0.24	-0.25	-0.37	-0.39	-0.34	-0.11	0.3
ABHD9	-0.16	0	0.07	0.14	0.67	0.44	0.24	0.11	0.43	0.08	0.22	-0.06	0.38	0.3	0.03	-0.62	0.12	0.09	-0.03	-0.04	0	0.21	-0.15	0.08	-0.26	-0.12	0.15	0.11	0.03	0.13	0.18	0.37	0.52	0.08	0.24	-0.05	-0.08	0.28	0.22	0.2	-0.02	0.04	-0.27	-0.15	0.81	0.2	-0.26	-0.05	-0.18
ABI1	-0.21	-0.4	0	0.11	-0.58	0.13	-0.41	-0.11	0.25	-0.21	-0.27	-0.26	0.12	-0.42	-0.13	0.28	-0.17	-0.28	-0.24	0.03	-0.27	-0.14	0.03	0.34	-0.36	-0.03	-0.31	-0.4	-0.24	-0.27	0.11	-0.12	-0.19	-0.21	-0.49	-0.28	-0.53	-0.22	-0.54	-0.59	-0.11	-0.35	0.1	-0.36	-0.38	-0.26	-0.07	0.35	0.07
ABI2	NA	-0.02	0.29	-0.16	-1.44	0.89	0.13	-0.01	-0.02	0.2	0.13	0.08	-0.12	-0.12	-0.28	-0.34	-0.03	-0.02	0.05	-0.09	0.2	-0.03	-0.12	0.05	0.19	0.33	-0.16	0.26	-0.22	0.07	0.39	0.01	-0.03	0.05	0.17	-0.18	0.22	0.2	0.05	0.03	-1.03	0.16	-0.32	0.12	NA	-0.77	NA	NA	NA
ABI3	-0.4	-0.18	NA	0.03	0.23	0	-0.14	-0.06	-0.28	0.36	-0.06	-0.17	-0.26	0.23	0	-0.17	-0.02	-0.24	-0.13	-0.21	-0.3	0.06	-0.38	-0.06	-0.06	-0.22	0.01	0.42	-0.05	0	-0.56	0.75	0.26	0.08	0.24	0.5	0.19	0.37	0.27	0.26	-0.05	0	0.52	0.12	0.81	0.57	1.02	NA	NA
ABI3BP	-0.266667	0.0233333	-0.1	0.04	-0.01	0.21	-0.16	-0.103333	0.29	-0.0633333	0.04	0.143333	0.496667	0.116667	-0.0466667	0.106667	0.21	0.21	0.15	0.16	0.176667	0.22	0.31	0.0966667	-0.00333333	0.296667	0.0433333	-0.0133333	0.216667	0.065	0.303333	0.476667	0.116667	-0.0666667	0.18	0.0333333	0.0566667	0.0866667	0.166667	0.243333	0.13	0.253333	-0.055	0.18	-0.155	0.34	-0.0533333	0.28	-0.0366667
ABL1	-0.14	-0.0833333	0.0733333	-0.136667	0.31	-0.186667	0	-0.00333333	0.0466667	-0.156667	-0.05	0.06	0.12	0.0933333	0.01	-0.21	0.15	-0.0733333	0.0133333	0.18	-0.123333	0.116667	0.103333	-0.02	-0.0933333	-0.02	-0.04	-0.05	0.02	-0.1	-0.226667	-0.113333	0.01	-0.12	-0.01	0.0633333	-0.0866667	-0.17	-0.00333333	-0.09	-0.12	-0.11	-0.01	-0.123333	-0.596667	-0.0666667	-0.01	0.22	-0.13
ABL2	-0.445	-0.09	-0.06	-0.175	0.16	-0.47	-0.055	0.065	-0.42	-0.03	-0.405	-0.25	-0.36	-0.165	-0.14	0.51	0.15	-0.24	-0.105	-0.03	-0.295	-0.26	-0.165	0.055	-0.095	-0.15	0.05	-0.06	-0.185	-0.27	-0.445	-0.465	-0.205	-0.145	-0.29	0.295	-0.02	-0.175	0.045	-0.145	0.215	-0.325	0.35	-0.085	-0.28	0.15	-0.315	-0.45	0.02
ABLIM1	0.12	0.24	-0.08	-0.36	0.15	-0.16	0.66	0.21	0.12	0.24	0.32	0.08	-0.54	0.46	0.18	0.05	0.28	0.01	-0.34	-0.29	-0.48	0.23	-0.66	-1.56	-0.55	-0.31	0.25	0.09	0.17	0.16	NA	0.16	-0.81	0.02	-0.11	0.45	-0.19	-0.53	0.22	-0.26	0.54	0.02	0.64	0.19	NA	NA	NA	-1.09	-0.09
ABLIM2	0.41	-0.02	-0.19	0.3	0.19	-0.25	0.04	0.1	0	-0.12	-0.4	0.06	-0.17	0.06	-0.18	0.32	-0.01	-0.03	-0.07	-0.56	-0.18	-0.33	-0.22	-0.91	0.28	-0.16	-0.17	-0.13	-0.02	0.25	-0.32	-0.41	-0.67	0.01	-0.25	0.2	-0.02	-0.42	0.01	-0.11	0.29	-0.07	0.57	-0.29	0.29	-0.8	0.01	0.19	-0.44
ABLIM3	1.07	-0.22	-0.1	0.03	-0.54	0.22	-0.14	-0.12	0.31	-0.05	0.07	-0.1	-0.35	-0.16	0.14	0.14	0.25	0.09	-0.61	-0.33	-0.86	0.06	-0.23	0.45	-0.64	-0.42	-0.06	-0.5	-0.37	-0.18	-0.23	-0.39	0.22	-0.25	0.02	-0.35	-0.35	-0.33	-0.1	-0.33	-0.18	0.01	0.08	-0.32	-0.69	-0.36	-0.33	-1.02	-0.27
ABO	-0.43	-0.205	-0.05	0.09	-0.285	0.03	-0.13	-0.04	-0.04	-0.065	-0.035	-0.19	-0.2	0.045	-0.21	0.14	-0.06	-0.01	-0.27	0.095	-0.225	-0.115	-0.38	0.08	-0.115	-0.21	-0.15	-0.21	-0.155	-0.205	-0.105	-0.11	-0.215	-0.145	0.085	-0.105	-0.055	0.17	-0.12	0.01	-0.165	-0.09	-0.155	-0.175	-0.155	-0.37	-0.31	-0.5	-0.315
ABP1	0.04	-0.18	-0.04	0.05	0.49	0.17	-0.02	0.06	0.32	-0.04	0.11	-0.04	0.09	0.01	-0.02	0.14	0.21	0.09	-0.27	-0.09	-0.44	0.05	0.04	0.13	-0.24	-0.13	0.02	-0.36	-0.23	0.03	0.08	-0.14	0.1	-0.06	0.06	-0.08	-0.39	0	-0.08	-0.52	0.32	-0.12	0.34	-0.25	0.03	-0.38	-0.13	-0.19	0.13
ABR	-0.02	0.0366667	-0.11	-0.0433333	0.203333	-0.23	0.106667	0.0466667	-0.08	-0.1	-0.16	-0.173333	-0.306667	-0.0566667	0.06	0.313333	0.106667	-0.15	-0.113333	-0.23	-0.15	0.113333	-0.0133333	-0.253333	-0.15	-0.123333	0.0566667	0.0933333	-0.06	-0.0266667	-0.0933333	0.0633333	-0.0966667	-0.0633333	-0.0966667	-0.0466667	-0.0933333	-0.123333	-0.0566667	-0.116667	0.16	-0.123333	-0.0133333	-0.01	-0.0633333	-0.12	-0.09	-0.576667	-0.306667
ABT1	0.22	-0.16	0.01	0.18	0.56	0.51	-0.26	0.1	0.19	0.02	0.01	0.13	-0.13	0.18	0.2	-0.62	0.14	-0.1	-0.26	0.67	-0.2	0.37	-0.2	0.3	-0.33	0	-0.03	-0.36	-0.01	-0.13	0.16	0.55	0.74	-0.32	0.09	-0.31	-0.07	0.05	0.22	-0.51	0.05	-0.28	0.01	0.1	0.23	-0.15	0.22	0.85	0.17
ABTB1	-0.51	0.01	-0.53	-0.16	-0.15	-0.31	0.01	-0.02	0.36	0.05	-0.44	-0.24	0.24	0.11	-0.21	0.13	0.31	-0.05	0.66	-0.15	0.15	-0.48	0.18	0.1	0.38	0.03	0.07	0.3	NA	0.27	0.4	-0.55	0.27	0.4	0.73	0.22	0.12	0	-0.02	0.32	-0.26	-0.43	0.01	-0.15	-0.18	-0.59	0.23	0.76	0.17
ABTB2	-0.31	-0.41	-0.54	-0.11	-1.29	0.32	0.35	-0.5	-0.07	-0.2	0.14	0.28	0.23	-0.2	-0.42	0.76	-0.47	0.02	0.1	-0.69	0.03	-0.22	-0.01	-0.7	0.36	0.49	-0.17	-0.01	0.13	-0.36	0.27	-0.45	-0.06	0.15	-0.11	-0.52	-0.03	0.08	-0.2	-0.25	-0.43	0.43	-0.29	0.03	-0.39	-0.37	0.01	NA	-0.3
ACAA1	0.22	-0.09	0.21	0.19	0.3	0.2	0.19	0.18	-0.08	-0.06	-0.08	-0.1	0.01	-0.04	0.3	-0.36	-0.04	0.01	-0.23	0.02	0	-0.21	-0.2	-0.38	0.04	-0.13	-0.12	0.03	-0.25	-0.2	0.05	0.11	-0.14	-0.2	-0.06	0.05	-0.41	0.3	-0.1	-0.39	-0.03	-0.14	-0.08	-0.09	0.29	-0.13	0.04	-0.36	-0.3
ACAA2	0.02	0.01	0.34	0.14	0.03	0.04	0.22	0.17	-0.4	0.33	0.13	-0.14	-0.04	-0.36	-0.01	-0.31	-0.41	0.14	0.08	0.46	0.33	0.59	-0.54	0.17	0.25	0.1	0.1	0.35	0.07	0.3	0.43	0.52	0.11	0.04	-0.39	-0.04	-0.01	0.46	-0.02	0.05	0.44	0.48	0.37	0.12	1.02	-0.24	-0.28	NA	0.73
ACACA	0.31	0.29	-0.21	-0.1	0.25	0.13	0.14	0.43	0.22	-0.08	-0.21	0.12	0.53	0.23	0.22	-0.7	0.21	0.22	-0.16	0.81	0.26	0.62	0.31	1.04	0.44	0.62	-0.1	-0.14	0.14	0.23	0.11	0.31	0.42	0.27	0.03	0.16	0.13	-0.13	0.14	0	0.49	0.08	0.5	0.07	0.67	0.79	0.05	0.24	0.52
ACACB	0.92	-0.37	-0.34	-0.65	-0.56	-0.85	-0.61	-0.68	-0.22	-0.61	-0.54	-0.53	-0.05	-0.64	-0.32	0.77	-0.29	-0.38	-0.47	-0.6	-0.44	-0.39	-0.02	-0.15	-0.67	-0.46	-0.55	-1.06	-0.52	-0.46	-0.36	-0.45	-0.41	-0.61	-0.78	-0.6	-0.53	-0.9	-0.61	-0.76	-0.4	-0.49	-0.25	-0.81	-0.58	-0.55	-0.45	-0.39	-0.35
ACAD10	-0.16	-0.19	0.1	0.15	0.31	-0.04	0.17	-0.21	-0.29	0.13	-0.1	-0.31	-0.54	-0.06	0.02	-0.13	-0.19	-0.18	-0.27	0.1	-0.27	-0.22	-0.49	-0.29	-0.25	-0.33	-0.04	0.19	-0.23	-0.11	-0.19	-0.57	-0.14	0.02	-0.16	0.03	-0.24	-0.04	-0.17	-0.15	-0.04	-0.06	-0.14	-0.15	0.14	-0.12	0.08	-0.73	-0.32
ACAD11	0.04	0.12	0.06	0.08	0.29	0.06	0.08	0.15	0.28	-0.07	0	0.08	0.1	0.03	-0.07	0.32	0.36	-0.05	-0.11	-0.02	-0.31	0.21	0.09	-0.03	-0.17	0.03	0.15	-0.13	-0.05	-0.03	-0.04	-0.2	-0.18	0.17	0.05	0.05	-0.01	-0.1	0.04	-0.24	0.06	-0.15	0.41	-0.04	-0.37	0.04	0.14	-0.13	-0.35
ACAD8	-0.55	0.14	NA	-0.06	NA	-0.67	0.39	0.77	-0.21	0.09	-0.52	0.08	-0.04	0.09	0.4	0.02	-0.06	0.11	-0.18	0.76	0.01	NA	0.14	-0.3	-0.52	0.02	0.06	0.33	0.16	-0.07	NA	0.32	0.22	-0.24	0.09	0.16	-0.22	0.29	0.05	0.08	-0.5	0.05	0.6	NA	-0.55	-0.11	NA	NA	0.64
ACAD9	0.37	0.1	-0.1	-0.36	0.03	-0.13	0.25	0.01	0.04	0.16	0.04	-0.21	-0.32	0.01	-0.02	0.06	-0.18	-0.21	0.1	0.04	0.09	-0.3	-0.07	-0.84	-0.06	-0.05	0.08	0.19	0.12	0.06	-0.71	-0.59	-0.22	0.06	0	0.16	0	-0.03	0.04	0.13	0.01	-0.17	-0.56	0.07	-0.27	0.24	0.05	0.03	0.02
ACADL	0.37	0.08	-0.53	0.53	0.46	-0.32	0.32	0.26	-0.17	0.01	0.02	0.22	-0.28	0.05	0.59	NA	0.03	0.03	0.04	NA	0.42	0.34	NA	NA	0.33	0.24	-0.15	0.04	0.07	0.21	0.68	1.4	-0.23	0.05	-0.23	-0.28	0.15	0.46	0.2	0.03	0.91	0.25	-0.35	-0.05	NA	1.1	1.07	NA	0.51
ACADM	1.38	-0.03	0.05	0.26	-0.43	-0.37	-0.25	-0.42	-0.11	-0.09	-0.26	-0.16	-0.4	-0.36	-0.27	-0.36	-0.3	-0.12	0.1	-0.49	0.77	-0.47	NA	-0.1	-0.19	-0.12	-0.18	0.03	-0.07	-0.08	0.09	-0.32	-0.23	0.11	-0.04	-0.06	-0.11	-0.14	-0.12	0	0.63	0	-0.78	0.22	0.32	0.31	0.83	0.21	NA
ACADS	0.05	-0.13	-0.08	0	0.28	0.34	-0.59	0.33	-0.2	-0.54	0.23	0.33	0.21	0.08	0.16	-0.56	0	-0.12	-0.24	0.7	-0.33	0.21	0.28	0.36	-0.62	0.19	-0.45	-0.95	-0.03	-0.3	0.03	0.74	0.84	-0.56	-0.39	-0.61	0.38	0.18	-0.31	-0.94	0.11	-0.39	0.19	0.21	-0.14	0.18	-0.04	1	0.39
ACADSB	NA	0.05	NA	1.1	-0.11	0.02	0.07	NA	0.19	-0.21	0.24	-0.2	NA	-0.21	NA	NA	-0.1	0.12	0	-0.23	0.09	NA	NA	NA	-0.24	-0.41	-0.07	0.39	NA	NA	NA	NA	NA	-0.57	-0.06	0.85	0.22	0.01	-0.06	-0.54	NA	-0.04	NA	NA	NA	NA	NA	NA	NA
ACADVL	0.87	-0.01	-0.32	0.19	0.07	0.06	0.13	0.15	-0.16	0.08	0.26	-0.48	-0.36	0.06	0.24	-0.31	-0.21	-0.26	-0.37	0.14	-0.19	-0.2	-0.53	0.05	-0.19	-0.24	0.14	0.19	-0.13	-0.23	0.13	0.31	0.19	0.01	-0.01	0.04	-0.05	0.25	0.11	0.29	0.44	0.08	0.16	-0.06	0.45	0.16	-0.13	-0.06	-0.41
ACAN	-0.03	-0.19	0.04	-0.22	0.04	0.17	-0.13	-0.06	-0.01	-0.25	-0.13	-0.11	0	-0.01	-0.01	-0.21	0.13	-0.09	-0.11	-0.16	0	0.07	-0.2	-0.25	-0.06	0.04	-0.17	-0.23	-0.22	-0.12	0.13	-0.04	0.11	-0.21	0.02	-0.21	-0.1	0.02	-0.14	-0.25	-0.11	-0.09	-0.1	-0.28	-0.1	-0.33	-0.08	-0.22	-0.02
ACAT1	0.745	-0.105	-0.05	0.27	-0.315	0.095	-0.13	-0.05	0.015	-0.025	-0.12	0.095	-0.245	-0.17	0.115	0.32	0.16	0.055	-0.24	0.06	-0.445	0.015	-0.16	0.16	-0.38	-0.25	-0.15	-0.33	-0.21	-0.01	-0.095	-0.06	-0.045	-0.16	-0.055	-0.195	-0.075	-0.24	-0.1	-0.265	-0.1	-0.105	-0.04	-0.195	-0.41	-0.225	-0.615	-0.425	-0.395
ACAT2	-0.09	-0.48	-0.2	-0.31	-0.49	-0.31	-0.41	-0.02	-0.36	-0.49	-0.29	-0.08	-0.51	-0.49	-0.22	0.43	-0.41	-0.47	-0.28	0	-0.53	0.12	-0.06	-0.45	-0.89	-0.51	-0.32	-0.7	-0.18	-0.2	-0.67	-0.12	-0.63	-0.65	-0.6	-0.38	-0.41	-0.51	-0.55	-0.94	-0.33	-0.28	0.07	-0.14	-0.8	0.16	-0.24	-0.57	-0.26
ACBD3	0.255	0.01	-0.07	0.115	-0.205	-0.515	0.21	0.5	-0.545	-0.19	-0.045	-0.135	-0.57	-0.325	0.25	-0.495	-0.585	-0.105	0.215	0.1	0.34	-0.15	-0.13	-0.015	0.345	0.08	-0.03	0.43	0.255	0.18	0.13	0.28	0.3	0.145	0.085	0.055	0.2	0.465	-0.115	0.535	-0.075	0.135	-0.86	0.215	0.3	0.34	-0.515	NA	0.22
ACBD4	-0.03	-0.38	0.16	0.14	-0.72	0.28	-0.49	-0.09	-0.06	-0.25	-0.09	-0.28	-0.06	-0.39	0.18	0.34	0	-0.19	-0.51	-0.06	-0.49	0.34	-0.28	0.47	-0.53	-0.37	-0.53	-0.41	-0.44	-0.26	0.02	-0.17	0.03	-0.27	-0.35	-0.31	-0.33	-0.23	-0.39	-0.31	-0.2	-0.32	0.34	-0.25	0.01	-0.57	-0.52	-0.36	-0.17
ACBD5	-0.02	-0.025	-0.06	-0.24	-0.105	-0.15	0.02	-0.06	-0.115	0.075	-0.03	-0.09	0.305	-0.05	-0.195	-0.3	-0.02	-0.05	0.145	0.575	0	0.305	0.39	-0.11	0.105	0.255	-0.105	-0.05	-0.18	-0.07	0.105	0.12	-0.235	-0.085	0.035	-0.13	0.19	-0.145	-0.1	-0.3	0.19	-0.05	0.085	-0.055	-0.15	-0.105	0.035	-0.01	0.33
ACBD6	0.66	0.31	0.14	0.27	-0.35	0.08	0.23	-0.04	-0.49	0.28	0.13	0.18	0.3	-0.3	0.11	0.02	-0.46	0.2	0.32	-0.2	0.79	-0.33	0.17	0.22	0.44	0.3	0.1	0.43	0.18	0	0.04	-0.08	0.09	-0.12	-0.34	0.21	0.14	0.36	-0.13	-0.15	0.1	0.26	-0.31	NA	0.73	0.2	0.64	-0.1	0.14
ACBD7	-0.37	0.09	-0.05	-0.12	0.4	-0.15	0.32	-0.02	-0.21	0.18	0.13	-0.09	0.01	-0.27	0.06	-0.69	-0.42	0.12	-0.17	0.1	0.06	-0.07	-0.07	-0.14	0.18	0	-0.02	0.13	-0.1	-0.13	-0.05	-0.41	0.11	-0.13	-0.36	0.09	-0.15	0.12	-0.28	-0.59	0.17	0.12	-0.09	0.17	0.24	-0.13	0.18	0.14	-0.17
ACCN1	0	-0.24	-0.33	-0.16	-0.11	0.02	0.12	0.15	-0.21	0	0.05	-0.16	-0.5	0.09	0.09	-0.27	-0.07	-0.08	-0.43	-0.08	-0.66	-0.18	-0.45	-0.12	-0.42	-0.4	-0.19	-0.41	0.26	-0.12	-0.43	0.23	0.18	-0.11	-0.01	-0.15	-0.36	-0.16	-0.08	0.04	-0.06	0.03	0.08	0.16	0.18	0.11	-0.09	-0.04	-0.03
ACCN2	0.12	0.07	-0.03	0.41	0.35	0.26	0.23	0.03	0.43	0.2	0.25	0.01	-0.39	0.22	0.12	0.31	0.57	0.33	-0.19	-0.18	-0.38	0.26	-0.25	0.06	-0.21	-0.18	0.18	0.35	-0.13	-0.11	0.15	-0.46	-0.18	0.03	0.29	0.19	0.03	0.05	0.45	0.55	-0.38	0.11	0.33	-0.21	-0.22	-0.04	-0.3	-0.56	0.12
ACCN3	-0.33	-0.16	0.14	-0.065	-0.33	0.13	0.135	-0.05	-0.11	-0.36	-0.155	-0.065	0.115	-0.08	0.1	-0.1	0.175	0.155	-0.045	0.035	0.16	0.31	0.005	0.155	0.13	0.1	-0.085	0.04	-0.01	-0.11	0.14	0.225	-0.015	0.005	0.06	-0.14	-0.05	0.195	-0.065	-0.08	0.25	0.07	0.265	0.135	0.25	0.05	-0.035	-0.3	0.23
ACCN4	0.18	-0.375	-0.11	0.06	0.245	-0.35	-0.235	-0.06	-0.305	-0.18	-0.46	-0.32	-0.21	-0.275	-0.155	0.615	-0.345	-0.31	-0.04	-0.35	-0.07	-0.39	-0.15	-0.33	-0.1	-0.025	-0.13	0	-0.27	-0.23	-0.24	-0.535	-0.475	-0.24	-0.355	-0.1	-0.38	-0.325	-0.235	-0.145	-0.145	-0.335	-0.295	-0.105	-0.05	-0.35	0.065	-0.595	-0.44
ACCN5	NA	-0.19	NA	NA	-0.8	0.46	0.51	NA	-0.22	0.02	0.09	-0.53	NA	0.24	0.98	-0.15	0.55	-0.04	-0.57	-1.1	-0.44	NA	NA	NA	-0.66	NA	-0.3	-0.77	0.05	0.67	1.18	-1.06	-0.08	-0.54	-0.05	NA	0.01	NA	-0.05	0.34	0.81	-0.29	-1.34	0.03	NA	1.4	NA	NA	0.97
ACD	0.24	0.165	-0.22	0.27	0.11	0.105	0.025	0.345	-0.025	0.04	0.12	0.055	-0.35	0.115	0.315	-0.2	0.125	-0.025	-0.215	0.005	-0.235	0.26	-0.3	0.37	-0.205	-0.155	0.015	-0.05	-0.05	-0.125	0.17	0.325	0.395	-0.015	-0.06	0.035	0.08	-0.08	0.035	-0.305	0	-0.035	0.39	-0.115	0.165	0.035	0.09	-0.05	-0.32
ACE	0.09	0.49	-0.24	-0.18	0.1	-0.23	0.12	-0.48	0.5	0.09	0.35	0.48	-0.3	0.24	-0.41	0.81	0.46	0.21	0.01	-0.27	-0.6	0.4	-0.17	0.04	0.98	-0.28	0.07	-0.3	0.29	-0.02	0.27	-0.95	-0.2	-0.02	0.01	-0.07	-0.34	-0.25	0.1	0.02	0.11	0.03	0.22	-0.23	-0.45	-0.26	0.95	-0.16	-0.01
ACE2	1.28	0.22	-0.67	-0.37	0.43	0.14	0.29	0.14	-0.16	0	0.16	-0.07	-0.31	0.3	-0.33	-0.24	-0.1	-0.1	0.02	0.32	0.03	0.38	-0.25	0.15	-0.05	-0.04	0	0.53	-0.08	0.32	-0.09	-0.76	-0.51	0.2	-0.06	0.18	-0.08	-0.26	0.02	0.33	-0.18	-0.05	NA	0.35	0.7	1.07	NA	0.3	0.42
ACHE	NA	0.07	-0.34	0.04	-0.495	0.3	0.11	0.59	0.245	-0.08	-0.12	0.23	-0.34	0.045	-0.05	-0.595	-0.06	0.07	-0.01	-0.23	-0.29	0.52	-0.64	-0.465	0.36	-0.03	0.18	0.415	-0.045	-0.3	0.375	NA	-0.04	0.115	0.01	0.405	0.36	0.155	0.26	0.14	-1.1	0.135	0.6	0.455	1.08	1.1	1.08	NA	1.35
ACIN1	0.445	-0.28	-0.155	-0.04	0.19	0.135	-0.16	0.105	0.065	0.095	-0.05	0.05	-0.16	-0.005	-0.06	0.12	-0.02	0.03	-0.145	-0.015	-0.22	0.085	-0.085	-0.08	-0.205	-0.115	-0.17	0.055	-0.205	-0.015	0.13	-0.08	-0.21	-0.035	-0.05	0.01	-0.18	0.05	0.195	-0.18	-0.165	-0.035	0.05	-0.085	-0.12	-0.09	0.15	-0.38	-0.095
ACLY	0.34	-0.01	0.14	0.48	-0.08	0.48	0.03	0.11	0.05	-0.11	0.11	0.08	-0.1	0.06	0.19	-0.21	0.08	0.06	-0.16	0.04	-0.25	0.37	-0.12	-0.05	-0.19	-0.14	0.34	0.11	0.16	0	0.33	0.11	0.41	0.08	-0.19	0.03	-0.07	0.41	-0.02	-0.32	-0.08	0.01	-0.06	NA	0.26	0.58	0.24	-0.13	0.01
ACN9	0.49	0.265	0.1	-0.795	-0.465	-0.63	0.31	0.17	-0.2	0.03	-0.27	-0.085	-0.135	-0.345	-0.365	0.89	-0.475	-0.24	0.48	-0.915	0.73	-0.39	-0.36	-0.975	0.04	0.185	0.015	0.43	0.31	0.585	-0.685	0.38	0.035	-0.075	-0.215	-0.035	0.3	0.16	-0.08	0.065	-0.245	0.17	-0.12	0.2	-0.74	NA	1.38	0.2	1.03
ACO1	0.1	0.35	0.37	0.07	0.17	0.26	0.55	-0.11	0.26	0.39	0.38	0.11	0.47	0.45	0.13	-0.52	0.11	0.36	0.01	-0.03	0.38	-0.12	-0.2	0.08	0.67	NA	0.27	0.42	0.23	-0.06	0.42	0.17	0.2	0.37	0.25	0.04	0.16	0.33	0.21	0.21	0.16	0.21	0.4	0.14	0.88	0.25	0.25	-0.66	0.1
ACO2	0.19	0.02	-0.09	0.13	0.59	0.32	0.29	0.34	0.01	-0.04	0.09	0.06	-0.29	0.22	0.19	-0.23	0.26	0.13	-0.21	-0.07	-0.08	0.29	0.08	0.2	-0.02	0.04	0	0.09	-0.21	0.04	0.43	0.36	0.67	-0.05	-0.1	-0.06	-0.07	0.17	-0.12	0.03	0.19	0.04	-0.21	-0.1	0.34	0.09	-0.35	0.3	-0.04
ACOT1	NA	0.03	NA	-0.08	0.26	-1.41	0.29	0.09	0.21	0.15	0.25	0.11	-0.77	0.21	0.41	-0.83	-0.09	-0.02	-1.15	0.58	-0.08	-0.31	-0.3	-0.17	-0.09	0.18	0.16	0.5	-0.07	-0.16	0.67	1.55	0.51	0.29	-0.17	0.24	0.08	0.79	0.18	0.18	0.57	-0.03	NA	0.07	-0.45	0.23	NA	NA	1.93
ACOT11	1.02	-0.05	0.015	-0.125	0.165	-0.22	-0.005	0	-0.1	0.055	-0.015	-0.19	-0.06	-0.185	-0.06	0.385	-0.135	-0.03	0.005	0.13	-0.08	-0.135	-0.155	-0.245	0.105	-0.065	-0.13	-0.02	0.005	0.005	-0.05	-0.265	-0.33	0.12	0.09	-0.045	0.025	-0.105	-0.08	-0.02	0.035	-0.065	-0.02	-0.025	-0.125	-0.15	-0.05	-0.025	-0.13
ACOT7	0.87	0.1	NA	-0.1	-1.01	NA	-0.04	0.01	0.13	0.14	-0.13	-0.04	0.44	-0.13	NA	NA	-0.08	0.05	-0.17	-0.85	0.37	-0.4	-0.37	NA	0.49	0.18	0.13	0.16	0.13	0.16	-0.26	-0.51	-0.79	0.08	-0.24	0.11	-0.09	-0.53	-0.13	-0.11	0.02	-0.01	0.2	0.11	NA	NA	NA	NA	NA
ACOT8	-0.13	-0.17	-0.26	-0.15	0.14	-0.01	0.17	0.07	0.46	0.05	0.43	0.15	-0.34	0.11	-0.05	0.5	0.33	0.07	-0.32	-0.5	-0.44	-0.18	-0.39	0.03	-0.12	-0.34	0.02	-0.5	0.08	-0.32	-0.28	-0.53	-0.36	-0.21	-0.02	-0.28	-0.16	-0.2	0.07	-0.16	-0.5	0.05	-0.02	-0.34	0.03	-0.19	0.02	-0.53	-0.21
ACOT9	-0.28	0.02	0.07	0.08	0.41	0.2	0.24	0.54	0.02	-0.02	0.18	-0.22	-0.28	0.01	0.18	-0.33	-0.01	-0.02	0.08	-0.06	0.13	0.4	-0.24	-0.59	-0.29	-0.1	0.21	0.18	0	0.01	0.27	0.02	0.33	0.1	0.11	-0.08	-0.04	0.31	0.01	0.21	0.28	0.27	0.1	0.06	0.27	0.47	0.27	-0.33	0.06
ACOX1	-0.77	0.045	0.255	0.2	-0.46	0.09	0.2	0.385	0.145	0.15	0.05	0.16	-0.495	0.205	0.25	-0.04	0.225	0.21	-0.335	0.1	-0.46	0.56	-0.24	-0.23	-0.145	0.065	0.15	0.19	-0.07	0.15	-0.05	0.12	-0.295	0.19	0.155	0.175	-0.005	0.075	0.27	0.12	0.165	0.11	0.95	0.045	-0.61	0.135	0.335	NA	0.425
ACOX2	1.42	-0.32	-0.39	-0.14	-0.33	-0.1	-0.28	0.14	0.15	-0.27	-0.09	-0.38	-0.49	-0.03	0.02	0.19	-0.09	-0.06	0.02	3.39	-0.27	-0.76	-0.18	0.19	-0.09	-0.14	-0.05	-0.34	-0.03	-0.11	0.27	-0.57	-0.48	-0.16	0.3	-0.14	-0.34	-0.23	0.12	0.29	-0.87	-0.02	-0.34	0.09	-0.72	0.19	-0.1	NA	NA
ACOX3	0.2	-0.05	0.12	-0.51	-0.45	-0.32	0.21	0.43	-0.06	0.25	0.03	-0.02	-0.05	0.17	0.63	-0.32	-0.08	-0.1	0.22	-0.43	-0.06	0.11	-0.14	-0.43	0.5	0.21	0.2	0.4	-0.19	0.07	0.19	-0.29	0.38	0.01	-0.09	0.03	-0.29	0.3	0.32	0.12	-0.32	-0.01	0.11	0.16	0.07	-0.09	0.41	NA	0.68
ACOXL	-0.68	-0.03	NA	0.02	-0.36	-0.23	0.08	-0.35	-0.36	0.11	-0.21	-0.14	-0.17	0.03	-0.12	0.73	0.28	-0.13	0.06	0.35	0.03	-0.39	0.15	0.08	-0.12	-0.15	-0.03	0.1	0.18	-0.09	-0.46	-0.11	-0.49	-0.17	0.03	0.06	-0.23	0.05	0.08	-0.02	0.27	-0.01	NA	0.11	-1.19	0.1	NA	NA	NA
ACP1	-0.223333	0.07	0.206667	0.246667	0.19	0.18	0.12	0.286667	-0.12	0.00666667	-0.113333	-0.1	-2.89e-18	-0.0866667	0.11	-0.173333	-0.07	-0.0633333	-0.02	0.0833333	0.04	0.0133333	0.0433333	0.0266667	-0.126667	0.22	0.0833333	0.0766667	0.00666667	0.0466667	0.103333	0.0366667	0.0266667	-0.213333	-0.09	0.0333333	0.0433333	0.21	0	-0.156667	0.17	-0.0333333	-0.0833333	-0.1	-0.0733333	0.0333333	0.04	-0.226667	-0.166667
ACP2	-0.26	-0.32	-0.14	-0.08	0.33	0.1	-0.23	-0.11	-0.02	-0.16	-0.08	-0.35	-0.23	-0.08	-0.2	0.48	0.27	-0.17	-0.47	-0.26	-0.89	-0.11	-0.2	0.06	-0.72	-0.5	-0.32	-0.84	-0.56	-0.43	-0.34	-0.63	-0.71	-0.55	0	-0.56	-0.44	-0.67	-0.12	-0.38	-0.42	-0.37	-0.16	-0.41	-0.71	-0.63	-0.79	-0.53	-0.27
ACP5	1.02	0.22	NA	0.35	0.78	-0.23	0.32	-0.19	-0.26	0.42	-0.02	-0.04	-0.76	-0.1	-0.07	-0.88	-0.65	0.25	-0.17	0.23	0.32	-0.16	-0.46	0.04	-0.24	-0.11	0.34	0.51	0.12	0.22	-0.47	-0.24	0.34	0.07	-0.01	0.12	-0.13	0.67	0.41	0.25	0.2	0.53	0.28	0.35	0.73	-0.78	0.94	NA	-0.79
ACP6	-0.33	-0.1	-0.13	0.02	-0.66	-0.15	0.02	-0.25	-0.33	-0.13	-0.06	-0.21	0.15	0.2	0.15	0.21	-0.07	-0.09	-0.21	-0.03	0.01	-0.36	-0.22	-0.13	0.51	0.29	-0.15	0.16	-0.15	-0.18	0.23	-0.22	-0.07	0.15	-0.1	0.26	-0.09	0.02	-0.01	0.5	0.36	-0.05	-0.67	0.11	1.09	0.03	-0.03	NA	-0.19
ACPL2	0.045	0	0.065	0.06	-0.03	-0.005	-0.155	-0.08	-0.09	-0.065	0.01	0.115	0.055	0.135	0.095	-0.34	-0.005	0.005	0.085	0.03	0.62	-0.02	0.27	0.18	0.51	0.25	0.035	0.02	0.045	0.155	-0.02	0.085	0.235	0.045	0.045	-0.065	0.195	0.06	0.125	0.04	0.165	-0.035	0.03	0.265	0.47	0.14	0.145	0.18	0.045
ACPP	0.59	0.15	0.12	-0.03	0	0.12	0.23	0.2	0.17	-0.11	-0.02	0.3	0.11	0.3	0.05	-0.37	0.39	0.23	-0.16	0.5	0.01	0.55	0.34	0.57	0.03	0.29	0.02	-0.08	0.27	-0.11	0.57	0.38	0.11	0.21	0.09	0.16	0.11	0.28	0.17	-0.21	0.6	0.37	-1.4	0.21	0.51	-0.09	0.28	NA	0.28
ACPT	0.08	-0.0466667	0.16	0.0233333	0.203333	0.14	-0.186667	-0.123333	0.14	-0.183333	-0.0933333	-0.0366667	0.283333	0.0366667	-0.0233333	-0.356667	0.07	-0.0233333	0.02	0.32	0.396667	0.263333	0.26	0.37	0.32	0.393333	-0.19	-0.1	-0.08	-0.00666667	0.333333	0.38	0.393333	0.0433333	0.13	-0.0633333	0.123333	0.11	-0.0533333	-0.35	0.0933333	-0.11	0.146667	-0.00666667	0.403333	-0.266667	-0.0266667	0.23	0.26
ACR	0.02	0.18	1.12	0.23	0.15	0.19	0.03	0.19	0.56	-0.11	0.23	0.29	-0.2	0.06	0.09	0.16	0.23	0.21	0.08	-0.17	-0.22	0.51	-0.26	0.27	-0.18	-0.16	0.13	0.24	0.17	-0.02	0.74	0.89	0.61	0.11	0.22	0.29	0.14	0.29	0.43	0.26	0.55	0	0.12	-0.05	0.42	0.13	0.73	NA	-0.37
ACRBP	0.3	0	0.03	-0.02	0.53	0.41	0.63	0.24	0.18	0.18	-0.07	-0.32	0.42	0.31	0.05	-0.17	0.39	0.36	0.36	0	0.35	0.45	0.56	-0.07	0.14	NA	0.51	0.23	0.18	0.02	-0.04	-0.88	0.55	-0.02	0.31	-0.44	-0.24	0.25	-0.23	-0.45	0.15	-0.12	-0.22	-0.07	0.48	-0.36	0.14	-0.68	0.4
ACRV1	-0.43	-0.06	0.22	-0.11	-0.58	-0.03	0.05	-0.09	-0.12	-0.15	0.01	-0.04	0.21	0.15	-0.1	-0.59	-0.1	-0.13	0.05	0.29	0.06	-0.04	0.17	-0.52	0.2	0.05	0.04	-0.04	0.06	-0.02	0.21	-0.51	0.56	-0.11	0.12	0.18	-0.11	0.12	0.08	0.3	0.54	0.02	0.07	0.08	0.62	-0.04	-0.01	0.54	0.09
ACSBG1	-0.1	0.04	0.01	-0.03	0.16	0.15	0.03	0.42	-0.04	0.37	0.12	-0.01	-0.2	0.05	0.24	0.97	0.35	0.13	-0.09	0.2	-0.24	0.3	-0.18	-0.15	-0.52	-0.33	0.14	-0.03	-0.01	0.03	-0.43	-0.03	-0.21	-0.06	-0.12	-0.03	0.07	-0.15	0.12	-0.11	0.52	0.12	0.5	-0.16	-0.04	-0.09	0.4	-1.25	-0.1
ACSBG2	-0.02	-0.14	-0.42	0.29	-1.35	-0.49	-0.19	0	-0.19	NA	-0.21	0.05	0.05	0.15	0.17	-0.2	-0.05	0.21	0.34	0.33	0.04	0	0.16	0.21	0.49	0.28	0.05	-0.14	-0.42	-0.49	-0.31	0.01	-0.24	-0.1	0.04	-0.69	0.32	0.11	-0.03	-0.21	-0.42	0.23	-0.24	0.1	-0.33	0	NA	NA	-0.56
ACSL1	0.435	-0.255	-0.435	0.165	0.335	-0.74	-0.92	0.61	-1.39	-0.665	-1.22	-0.75	-0.665	-0.635	0.63	-0.715	-0.73	-0.75	0.865	-0.775	0.295	-1.26	-0.69	-0.225	0.81	0.005	0.09	0.94	-0.285	0.605	-0.435	0.07	0.105	0.555	-0.28	-0.23	-0.11	-0.425	-0.895	-0.255	0.335	-1.1	-0.49	-0.37	0.64	-0.31	-0.075	1.465	0.115
ACSL3	0.445	0.15	0.215	0.005	0.16	0.31	-0.2	0.165	-0.065	-0.19	0.035	-0.075	-0.375	-0.295	-0.095	-0.335	-0.28	0.065	-0.09	0.345	-0.365	0.31	-0.225	0.495	-0.36	-0.14	-0.005	-0.21	0.04	0.065	-0.725	0.2	-0.1	-0.015	0.06	-0.045	0.02	-0.465	-0.205	-0.28	0.215	-0.02	0.065	-0.04	-0.6	-0.54	-0.21	0.58	0.285
ACSL4	0.13	-0.04	0.02	0.11	0.56	-0.05	0.41	-0.02	0.08	0.24	0.15	0.27	-0.4	0.08	-0.12	0.98	0.27	-0.03	-0.4	-0.34	-0.58	0.12	-0.53	-0.24	-0.5	-0.31	0.21	0.21	-0.03	0.11	-0.26	-0.09	-0.05	0.13	-0.11	0.22	0	-0.32	0.14	0.21	0.6	0.09	0.65	0.02	-0.7	-0.32	0.2	-0.3	-0.02
ACSL5	NA	0.17	-0.4	0.32	0.6	-0.16	0.17	0.49	-0.58	0.15	-0.3	0	-0.39	-0.29	0.52	-0.82	-0.85	0	0.25	0.54	0.59	0.23	-0.3	0.06	1.09	0.42	0.31	0.66	0.05	0.25	0.26	-0.11	0.35	-0.09	-0.19	0.44	0.06	0.2	-0.14	0.21	0.09	0.24	0	0.22	0.93	0.16	NA	NA	0.19
ACSL6	-0.22	-0.08	-0.26	0.13	0.57	0.31	-0.04	0.33	0	-0.16	-0.06	-0.09	0.05	0.07	0.02	-0.33	0.16	-0.07	-0.13	0.1	0.51	0.32	0.04	-0.04	0.42	0.31	-0.16	-0.16	-0.13	-0.32	0.57	0.51	0.51	0.04	-0.1	0	-0.09	0.04	0.07	0.13	0.64	-0.18	-0.19	0.19	0.56	-0.42	0.39	0.56	0.5
ACSM1	0.65	0.04	-0.32	-0.64	0.26	-0.42	-0.03	-0.24	-0.17	-0.32	-0.11	0	-0.03	-0.1	-0.06	0.61	-0.04	0.02	0.09	-0.15	-0.18	0.01	0.2	-0.38	-0.25	-0.02	-0.23	-0.13	0.15	0.04	-0.59	-0.71	-0.02	-0.03	-0.2	-0.07	-0.08	-0.04	-0.19	-0.14	-0.3	-0.15	0.31	0.05	-0.2	-0.36	0.41	0.06	-0.42
ACSM3	-0.04	0.16	-0.03	0.255	-0.14	-0.425	0.01	0.175	-0.275	0.02	0.08	-0.01	0.27	0.22	0.075	-0.075	0.06	0.115	0.265	0.13	0.48	0.2	-0.06	-0.025	0.195	0.24	0.03	0.01	0.165	-0.3	0.305	0.28	0.255	0.135	-0.01	0.17	-0.045	0.735	0.1	0.5	0.165	0.425	0.075	0.18	0.27	0.48	0.55	NA	0.07
ACSS1	-0.13	-0.2	-0.475	-0.055	-0.41	-0.11	-0.285	0.1	0.115	-0.07	0.02	-0.03	0.26	-0.15	-0.065	-0.115	-0.035	0.015	0.115	0.195	-0.23	-0.37	0.09	-0.07	-0.35	0.025	-0.26	-0.27	0.17	0.37	-0.265	0.02	-0.145	-0.27	0.07	-0.07	0.16	-0.185	-0.255	-0.31	-0.515	0.01	0.07	0	-0.44	-0.005	0.08	0.27	-0.44
ACSS2	-0.01	0.07	-0.62	0.11	0.08	0.13	-0.05	0.05	0.03	-0.25	-0.22	0.08	0.15	0	0.08	-0.29	0.08	0.13	0.25	-0.03	0.06	-0.03	-0.29	0.19	0.19	NA	0.02	0.14	-0.21	-0.42	0.34	0.5	0.63	0.23	0.2	-0.08	-0.31	-0.03	-0.08	0.11	0.13	0.13	-0.1	-0.17	0.23	-0.28	0.03	0.28	0.23
ACTB	-0.279667	0.00233333	-0.652667	-0.771667	-0.752333	-1.347	-0.048	-0.466667	-0.845	0.128	-0.342	-0.788333	-0.128	-0.085	-0.331333	-0.118333	-0.471333	-0.557667	0.128333	0.151667	0.277	-1.00433	-0.0246667	0.143	0.135	-0.332333	-0.00366667	0.156667	-0.357	-0.377	-0.079	0.038	0.114	0.395333	-0.321	0.066	0.011	-0.049	-0.064	0.415	0.28	-0.273667	-0.346333	-0.361333	0.247333	-0.147333	-0.275	-0.171786	-0.0268966
ACTC1	0.76	-0.1	0.34	0.12	0.3	-0.05	-0.04	0.16	-0.13	0.23	-0.05	-0.05	-0.45	-0.02	0.06	-0.36	-0.05	-0.02	-0.21	0.38	-0.56	0.02	-0.34	0.07	-0.54	-0.45	0.04	0.21	-0.02	0.09	-0.44	-0.18	0.14	0.02	-0.04	0.01	0	-0.15	-0.04	0.04	-0.08	-0.08	0.12	-0.14	-0.48	0.05	-0.24	-0.22	-0.02
ACTG1	-0.14	0.235	-0.52	0.005	-0.53	-0.505	-0.17	0.17	0.135	0.11	-0.545	-0.42	-0.015	0.36	0.245	-0.465	0.16	-0.225	0.02	0.06	-0.11	-0.53	0.155	-0.02	0.25	-0.035	-0.075	0.075	-0.335	-0.16	-0.105	-0.06	0.21	0.245	0.925	-0.01	-0.095	0.07	0.385	0.505	0.18	-0.515	-0.265	-0.205	0.275	-0.41	-0.32	0.23	0.04
ACTL6A	-0.12	0.03	0.43	0.13	-0.42	-0.24	-0.01	-0.09	-0.19	0.22	-0.05	0.04	-0.18	-0.24	0.04	-0.13	-0.51	-0.03	0.33	0.12	0.44	-0.14	0.01	0.13	0.16	0.26	0.09	0.45	0.31	0.28	0.05	-0.14	0.16	0.28	0.04	0.49	0.15	-0.12	-0.05	-0.2	0.22	0.04	-0.05	0.3	0.23	0.27	0.45	-0.05	1.17
ACTL6B	0.01	0.17	-0.26	0.12	-0.02	0.22	-0.07	0.22	0.22	-0.01	0	0.1	-0.01	0.22	-0.12	0.36	0.34	0.01	-0.05	-0.01	-0.46	0.52	-0.01	0.39	-0.23	0.06	-0.01	-0.01	-0.04	-0.08	0.17	-0.52	-0.03	0.07	0.01	0.18	-0.13	-0.21	0.16	0.12	0.14	-0.01	0.36	-0.16	-0.05	-0.22	0.28	-0.69	-0.07
ACTL7A	NA	0.28	0.72	0.63	0.44	0.21	0.24	-0.65	0.18	0.05	0.26	0.2	0.23	0.07	0.45	0.17	0.22	0.12	0.19	0.21	-0.18	-0.07	-0.29	0.42	-0.27	NA	-0.03	0.35	0.07	-0.19	0.1	1.06	0.72	0.38	0.2	-0.04	0.02	0.42	-0.45	0.24	0.2	-0.02	0.7	0.04	NA	0.62	0.47	NA	NA
ACTL7B	-0.09	0.22	NA	0.53	0.65	0.25	0.48	-0.15	0.85	0.04	0.29	0.34	-0.21	0.47	0.16	-0.36	0.62	0.32	-0.68	0.3	NA	NA	-0.55	0.21	-0.37	0.11	0.4	0.25	0.07	0.06	0.31	0.82	0.42	0.29	0.64	0.17	0.04	0.5	0.32	-0.04	0.15	0.28	0.66	0.02	NA	-0.24	1.15	NA	NA
ACTL8	-0.11	0.23	-0.5	-0.15	0.16	0.29	-0.18	-0.06	-0.06	-0.04	-0.1	0.07	0.78	-0.13	-0.24	-0.16	-0.22	0.02	0.16	0.23	0.52	NA	0.18	0.15	0.49	NA	-0.09	-0.17	-0.01	0.14	0.63	-0.13	0.29	0.04	0.2	0.09	-0.11	0.52	-0.36	-0.09	0.62	0.15	-0.22	0.34	0.11	0.01	0.73	-0.13	0.49
ACTN1	-0.84	-0.53	-0.79	0.04	-0.06	-0.12	0.74	-0.15	-0.17	0.48	0.37	0.22	-0.63	-0.14	0.39	-0.11	0.08	0.27	0.05	0.29	NA	-0.41	-0.74	-0.43	0	-0.44	0.07	0.6	-0.32	-0.08	0.08	-0.39	-0.22	0.2	0.22	0.16	-0.19	-0.05	-0.17	0.16	0.21	0.43	-0.29	-0.49	0.07	-0.65	0.19	1.71	-0.13
ACTN2	-0.28	0.14	0.29	0.13	-0.08	0.13	-0.12	0.03	0.45	-0.11	0.19	0.21	0.27	0.11	-0.11	0.17	0.41	0.28	-0.49	0	-0.65	0.4	0.04	0.27	-0.54	-0.19	0.09	-0.56	-0.31	-0.1	0	-0.19	-0.22	-0.21	0.13	-0.01	-0.03	-0.36	0.23	-0.27	0.29	0.06	0.28	-0.24	-1.1	-0.31	-0.29	-0.89	-0.11
ACTN3	0.39	-0.12	-0.28	0.18	0.1	0.71	-0.04	-0.18	0.12	-0.06	0.08	-0.05	-0.66	0.28	0.16	-0.58	0.26	0.03	-0.27	0.19	-0.37	0.26	-0.08	0.38	-0.27	-0.27	0.14	0.03	0.02	0.01	0.1	-0.14	0.18	0.1	-0.14	0.19	0.01	0.74	0.22	0.26	-0.08	-0.04	0.1	0.04	-0.18	-1.07	0.45	NA	0.03
ACTN4	-0.15	0.01	0.56	-0.19	0.5	0.23	0.27	0.15	0.54	-0.01	0.22	0.34	0.04	0.48	-0.12	-0.68	0.42	-0.02	-0.23	0.7	-0.21	1.08	0.17	0.31	-0.06	0.03	0.4	0.39	-0.05	0	0.25	0.21	0.26	0.24	0.32	0.25	0.06	0.26	0.45	-0.09	0.43	-0.02	0.43	0.29	0.32	0.34	0.43	0.71	0.43
ACTR10	-0.07	0.09	0.8	-0.14	-0.25	-0.33	0.39	0.56	-0.62	0.18	0.24	-0.09	-0.37	-0.53	-0.04	-0.14	-0.45	0.03	0.15	-0.08	0.47	-0.36	-0.89	-0.93	-0.25	-0.26	0.33	0.85	0.22	0.14	-0.14	0.14	0.01	0.66	-0.26	0.51	0.16	0.39	0	0.31	0.12	0.54	-0.59	0.39	0.26	-0.04	-0.29	NA	-0.21
ACTR1A	0.08	0.01	-0.43	0.38	0.66	0.24	0.09	0.05	-0.18	0.11	-0.02	-0.16	0	0.07	0.13	-0.5	-0.26	-0.2	-0.03	-0.42	0.02	-0.31	-0.32	0	-0.03	-0.08	0.22	0.33	-0.08	0	0.07	-0.02	0.08	-0.15	0.1	-0.01	-0.1	0.39	-0.07	-0.03	-0.03	-0.13	0.17	-0.01	0.33	-0.14	0.31	-0.39	-0.13
ACTR1B	NA	0.39	0.19	0.15	-0.53	0.07	0.38	0	0.01	0.2	0.22	-0.13	-0.38	0.27	-0.25	0.09	0.23	-0.02	0.29	0.62	0.24	-0.63	-0.51	0.17	0.18	-0.09	0.14	0.59	NA	-0.11	0.32	0.29	-0.19	0.13	0.37	0.39	0.1	0.36	0.22	0.57	0.38	0.2	NA	0	-0.43	NA	NA	NA	0.07
ACTR2	1.06	0.94	0.16	0.02	0.21	-0.86	0.12	0.88	-0.67	-0.02	-0.31	0.19	-0.38	-0.31	0.17	-0.45	-0.41	-0.08	0.1	-1.14	0.11	0.27	-0.49	-0.1	-0.04	-0.16	0.37	0.85	0.17	0.24	0.65	-0.05	0.08	-0.02	-0.03	-0.12	-0.18	-0.1	0	0.27	0.29	-0.28	0.63	-0.18	0.99	NA	0.39	NA	NA
ACTR3	-0.58	0.48	-0.21	0.47	0.6	-0.43	-0.14	0.66	-1.3	-0.22	-0.38	-0.28	-0.03	-0.6	0.25	-0.85	-1.17	-0.25	0.67	0.81	0.83	-0.47	-0.29	-0.28	0.54	0.21	0.13	0.61	0	0.23	0.36	0.91	0.65	0.53	-0.11	-0.35	0.06	0.6	-0.2	-0.13	0.64	-0.05	-0.55	0.7	1.12	-0.74	0.46	0.62	0.65
ACTR3B	NA	0.18	NA	NA	NA	0.16	0.31	NA	-0.11	-0.13	0.01	-0.12	NA	0.17	1.15	0.87	-0.25	0.21	NA	NA	NA	NA	NA	2.3	NA	NA	0.68	0.57	0.07	0.12	NA	NA	-0.02	0.22	NA	0.1	-0.22	0.62	0.06	-0.34	NA	0.21	NA	-0.13	NA	NA	NA	NA	NA
ACTR5	-0.1	0.05	-0.12	-0.05	0.22	-0.05	0.14	0.17	-0.06	-0.07	0.13	0.07	-0.52	-0.06	0.21	0.14	0.08	0.06	-0.16	-0.06	-0.56	0.18	-0.24	0.02	-0.52	-0.47	0.2	0.02	-0.21	0.07	-0.02	-0.11	-0.27	0.01	-0.37	0	-0.16	-0.13	-0.14	-0.24	0.14	-0.09	0.09	-0.03	-0.39	-0.35	-0.36	-0.56	-0.18
ACTR6	1.25	0.55	0.33	0.33	-0.2	0.36	0.17	-0.08	0.7	NA	-0.25	NA	-0.08	NA	-0.01	0.45	-0.26	-0.71	-0.37	0.03	-0.48	0.29	-0.05	0.77	-0.6	-0.54	NA	1.36	0.32	0.87	0.31	0.71	0.27	0.9	0.18	0.43	-0.04	-0.08	0.25	1.54	-0.21	NA	0.08	NA	0.24	-0.34	-0.09	NA	0.18
ACTR8	-0.37	0.33	0.23	-0.31	-0.41	0.12	0.2	-0.34	-0.15	0.2	0.16	0.16	NA	-0.14	-0.31	0.05	-0.01	-0.04	-0.67	0.63	0.15	-0.7	NA	-0.23	0.17	-0.23	-0.15	0.23	-0.23	0.36	-0.78	0.26	0.2	-0.05	-0.3	0.14	0.09	0.05	0.18	-0.21	NA	0.1	NA	0.52	NA	NA	-0.2	NA	NA
ACVR1	0.58	0.1	NA	-0.62	0.26	-0.71	0.23	0.05	-0.93	-0.3	-0.48	-0.73	-0.58	-0.69	0.68	-0.38	-0.6	-0.2	-0.14	1.1	0.25	-0.94	0.12	-0.34	0.08	0.16	0.35	0.69	0.12	-0.12	-0.53	0.89	-1.11	0.31	-0.34	0.02	0.38	0.25	0.01	0.39	0	-0.41	-0.17	-0.29	0.94	NA	NA	NA	NA
ACVR1B	-0.155	0.045	0.005	-0.075	0.17	-0.05	0.16	0.025	0.04	0.13	0.115	-0.06	-0.175	-0.02	0.02	-0.19	-0.045	-0.125	-0.18	0.16	-0.12	0.065	-0.18	-0.045	-0.185	-0.215	-0.005	0.19	-0.11	0.04	-0.28	-0.24	-0.1	0.035	0.01	0.02	0.09	-0.145	0.075	0.25	-0.05	-0.03	0.115	-0.05	-0.09	-0.58	-0.77	0.02	-0.05
ACVR2A	-0.36	-0.33	-0.05	-0.14	-0.32	-0.21	-0.04	0.13	-0.03	-0.14	-0.18	0.08	-0.21	0.29	0.31	-0.28	0.01	-0.17	-0.08	-0.15	-0.27	-0.09	-0.36	0	-0.05	-0.33	0.1	0.29	-0.01	0.11	0.02	0.38	0.21	0.09	-0.2	0.11	-0.21	0.42	0.17	0.94	0.36	-0.15	0.66	0.1	0.73	-0.04	-0.43	NA	-0.42
ACVR2B	-0.06	-0.01	0.08	-0.05	0.18	-0.16	-0.05	-0.12	-0.17	0.08	-0.05	-0.28	-0.56	-0.03	-0.09	0.24	-0.06	-0.22	0.02	-0.13	-0.08	-0.28	-0.46	-0.21	-0.07	-0.27	-0.23	0.03	-0.21	-0.21	-0.22	-0.52	-0.31	-0.13	-0.08	-0.13	-0.18	0.06	-0.05	-0.12	-0.17	-0.19	-0.42	-0.2	0.13	0.11	0.16	-0.25	-0.27
ACVRL1	-0.58	0.1	0.08	0.37	0.07	-0.12	0.54	0.56	0.11	0.08	0.24	0.22	-0.09	-0.05	-0.24	0.46	0.26	0.15	-0.01	-0.29	-0.43	-0.04	0.07	-0.46	-0.22	-0.18	-0.02	-0.18	0.23	0.11	-0.35	0.1	-0.15	-0.14	0.07	0	0.27	-0.24	0.51	0.55	-0.17	0.18	0.3	0.29	0	-0.8	0.03	-0.49	0.36
ACY1	-0.21	-0.34	-0.16	-0.03	-0.04	-0.46	0.13	-0.07	0.04	-0.02	0.26	-0.08	-0.05	0.12	-0.13	-0.06	0.06	-0.2	0.02	-0.05	-0.25	-0.03	0.15	0.34	-0.28	-0.06	-0.08	-0.07	-0.11	-0.31	-0.24	0.01	-0.37	-0.21	-0.05	-0.31	-0.26	-0.01	0.14	0	-0.03	-0.17	0.67	0.01	0.14	0.06	-0.01	0	-0.12
ACY3	0.07	-0.02	0.22	0.01	0.68	0.03	-0.08	-0.21	0.16	-0.04	0.06	0.1	0.32	0.01	-0.08	-0.45	0.24	0.03	-0.17	0.42	0.08	0.79	0.56	0.41	-0.05	0.09	0.02	-0.14	-0.03	-0.05	0.22	0.11	0.38	0	-0.03	0.01	-0.12	0.23	-0.14	-0.32	0.29	-0.15	-0.04	-0.04	0.17	0.03	0.01	0.1	0.09
ACYP1	-0.5	0.4	0.3	0.31	0.3	-0.17	0.06	-0.03	-0.63	0.05	0.35	-0.17	-0.27	-0.53	-0.46	-0.17	-0.79	-0.05	-0.17	-0.06	0.1	-0.06	-0.61	-0.62	0.58	0.06	0.18	0.23	0.34	-0.07	0.14	0.72	0.15	-0.02	-0.37	0.37	-0.01	0.64	-0.08	-0.34	-0.2	0.1	-0.39	0.3	0.8	0	0.45	NA	0.15
ADA	0.43	-0.015	-0.33	0.06	-0.31	0.15	-0.305	-0.11	0.1	-0.21	-0.24	-0.2	0.205	-0.095	0.055	0.425	-0.01	0.05	-0.34	0.105	-0.575	0.115	0.02	0.29	-0.58	-0.105	-0.23	-0.62	-0.275	-0.145	-0.285	-0.08	-0.135	-0.26	0.125	-0.34	-0.1	-0.215	0	-0.555	-0.11	-0.225	-0.065	-0.4	-0.34	-0.795	-0.23	-0.25	-0.09
ADAD2	0.04	0.12	0.1	-0.09	0.8	0.12	0.1	0.01	0.02	0.1	0.02	0.07	0	0.14	0.14	0.12	0.14	0.18	0.06	-0.35	0.02	0.01	0.03	-0.11	0.27	0.08	0.13	-0.1	0.05	0.04	-0.22	0.33	-0.22	0.03	0.12	-0.11	-0.3	0.25	0.11	0.2	-0.04	0.04	0.09	0.08	0.07	0.13	0.12	0.07	0.01
ADAM10	-0.1	0.04	NA	-0.01	0.86	-0.25	0.06	0.39	-0.13	-0.32	-0.02	-0.01	-0.1	0.27	0.28	-0.22	0.26	-0.03	-0.17	0.53	-0.41	0.11	-0.07	-0.77	-0.01	-0.34	0.07	0.33	0.05	-0.02	0.44	0.1	0.29	0.21	-0.06	0.06	-0.29	-0.39	0.15	-0.08	-0.32	-0.04	0.06	-0.02	NA	0.8	-0.11	NA	-0.04
ADAM11	0.55	-0.36	0.09	-0.77	-0.41	-0.76	-0.91	-0.61	-0.47	-0.94	-0.69	-0.58	-0.07	-0.63	-0.78	1.01	-0.31	-0.62	-0.63	-0.07	-0.69	0.37	-0.13	0.22	-0.75	-0.41	-0.65	-1.02	-0.45	-0.67	0.28	0.04	-0.64	-0.5	-0.66	-0.64	-0.58	-0.4	-0.66	-0.95	-0.01	-0.71	-0.12	-0.51	-0.42	-0.95	-0.66	-0.3	-0.62
ADAM12	0.69	0.01	0.43	0.12	-0.46	0.42	-0.19	0.43	-0.17	0.16	0.09	0.29	-0.29	-0.26	0.27	0.02	-0.05	-0.04	-0.02	0.29	-0.48	0.19	-0.21	0.41	-0.57	-0.38	0.11	-0.05	0.09	0.16	-0.01	0.38	-0.11	-0.11	-0.38	-0.12	0.04	0.5	-0.17	-0.2	0.22	-0.12	0.02	0.13	0.11	-0.12	0.34	-0.1	-0.53
ADAM15	-0.2	-0.22	0.13	0.29	-0.08	0.22	-0.08	0.29	-0.17	-0.05	-0.19	-0.26	-0.3	-0.21	0.14	0.15	0	-0.23	-0.03	-0.37	-0.35	-0.15	-0.11	-0.32	-0.29	-0.26	-0.13	-0.03	-0.15	-0.23	-0.39	-0.38	-0.28	-0.33	-0.22	-0.48	-0.33	-0.2	-0.1	-0.45	-0.29	-0.11	-0.4	-0.1	0.18	-0.15	-0.23	0.12	-0.6
ADAM17	0.035	-0.035	-0.05	0.275	0.13	0.205	0.005	0.28	-0.22	-0.005	-0.045	-0.015	-0.03	0.125	0.32	-0.56	0.01	-0.085	-0.045	0.255	-0.05	0.065	-0.11	0.09	0.09	0.305	-0.03	0.215	0.005	0.08	0.165	0.37	0.24	-0.04	0.03	-0.135	-0.055	0.015	0.03	-0.085	-0.08	-0.005	-0.005	0.385	0.415	0.08	0.125	0.255	0.125
ADAM18	0.33	0.36	-0.02	0.78	0.42	0.72	0.45	0.25	0.01	0.06	-0.21	0	0.05	0.17	0.32	-0.2	0.15	0.33	0.51	-0.69	0.36	NA	-0.08	-0.58	0.56	0.11	-0.13	0.03	0.35	NA	-0.42	2.11	0.38	0.34	-0.07	0.5	-0.07	0.1	0.03	NA	0.84	0.35	0.47	NA	1.09	0.2	NA	NA	NA
ADAM19	0.16	0.23	-0.47	0.08	0.08	0.11	0.21	0.09	0.28	0.1	0.23	0.18	-0.62	0.17	0.25	-0.91	0.4	0.16	-0.17	0.16	-0.45	0.61	-0.38	0.06	-0.03	-0.32	0.24	0.15	-0.1	-0.03	-0.39	0.19	0.72	0.22	-0.12	0.05	-0.07	0.08	0.05	-0.12	0.21	0.15	-0.48	0.13	-0.15	0.22	NA	1.23	-0.37
ADAM2	-0.22	0.13	0.08	0.54	0.22	0.2	0.2	0.43	0.01	-0.21	0.16	-0.02	0.38	0.07	0.8	-0.44	0.24	-0.01	0.26	0.84	-0.03	0.22	-0.29	0.67	0.53	NA	-0.24	-0.02	-0.35	-0.21	0.29	0.92	0.34	0.26	-0.07	-0.21	-0.6	0.08	-0.45	NA	0.33	-0.03	0.62	0.12	0.38	-0.35	1.19	NA	NA
ADAM20	0.5	0.02	-0.31	-0.5	-0.25	-0.65	0.06	0.12	-0.94	-0.07	-0.13	-0.6	-0.8	-0.32	-0.16	-0.2	-0.85	-0.53	-0.02	0.48	-0.11	-0.54	-0.61	-0.58	-0.05	-0.35	-0.2	0.38	0.02	0	-0.19	-0.23	-0.08	-0.04	-0.32	0.09	0.33	-0.19	-0.3	-0.15	0.46	-0.1	0.18	-0.09	-0.16	0.27	0.2	0.11	0.01
ADAM21	-0.11	-0.06	0.04	-0.06	0	0.05	0.06	0.36	0.24	0.16	0.36	0.68	0.11	0.28	-0.05	-0.08	0.12	0.07	0.03	0.8	-0.45	0.61	0.34	0.71	-0.73	-0.03	0.28	-0.18	0.54	0.19	-0.42	0.4	0.06	0.02	-0.25	0.05	0.01	0.13	-0.03	-0.49	0.19	0.11	0.32	0.59	-0.59	0.04	-0.12	0.2	0.01
ADAM22	-0.265	-0.115	0.13	0.035	-0.175	-0.41	0.11	0.175	0.355	0.18	0.29	0.24	-0.615	0.165	0.01	0.18	0.19	0.12	-0.26	-0.305	-0.305	0.405	-0.185	0.575	-0.34	-0.315	0.015	-0.085	-0.015	0.055	-0.47	-0.31	0.105	0.175	-0.015	0.075	-0.04	-0.315	0.25	0.31	0.265	0.15	-0.045	0.095	0.39	0.375	0.325	NA	NA
ADAM23	-0.36	-0.12	-0.18	-0.23	0.15	-0.17	0.23	0.01	-0.39	0.2	0.18	0.01	-0.06	-0.04	-0.25	-0.48	-0.02	0.11	0.05	-0.02	0.32	-0.06	0.03	-0.12	0.51	0.2	0.15	0.35	-0.14	-0.05	0.2	-0.1	0.43	0.03	-0.09	0.41	-0.06	0.22	-0.01	0.21	1	0.16	0.15	0.17	0.72	0	0.66	-0.85	0.04
ADAM28	-0.29	-0.07	NA	0.09	-0.38	0.14	0.06	-0.16	-0.16	0.01	0.03	-0.01	-0.4	0.03	-0.38	1.09	-0.01	0.11	0.19	-0.42	0.07	-0.34	-0.21	0.11	0.06	0	-0.2	-0.24	-0.24	0.17	-0.25	-0.86	-0.12	0.03	0.04	0.18	0.14	-0.61	-0.06	0.1	-0.02	-0.03	-0.33	0.01	-0.85	0.35	-0.02	0.31	-0.8
ADAM29	0.46	0.06	0.17	0.15	-0.12	-0.01	0.27	0	0.08	0.03	0.48	0.36	0.43	-0.3	0.04	-0.22	0.28	0.25	0.36	0.5	0.31	-0.23	0.39	0.38	0.17	0.18	0.14	0.15	NA	0.17	0.13	0.37	0.03	-0.01	0.17	0.43	0.11	-0.02	0.04	-0.21	-0.07	0.13	-0.02	0.08	-0.23	0.21	-0.09	-0.12	0.14
ADAM30	NA	0.1	NA	0.26	NA	0.21	0.41	0.58	0.11	0.23	0.4	0.51	-0.79	0.22	0.67	NA	0.34	0.23	-0.07	NA	-0.57	NA	-0.43	NA	-0.5	-0.04	0.19	0.62	0.29	0.16	0.49	-0.57	0.33	-0.06	0.13	0.6	0.24	0.35	0.12	0.23	NA	0.1	-0.35	-0.34	0.32	1.33	1.91	NA	NA
ADAM33	0.385	-0.045	0.095	-0.06	0.335	-0.1	-0.005	-0.06	0.115	-0.25	-0.175	-0.185	0.07	-0.045	-0.17	0.245	-0.085	-0.045	-0.11	-0.025	0.44	-0.12	0.02	-0.34	0.055	0.07	0.05	-0.06	0.03	-0.055	-0.04	-0.5	-0.19	-0.07	0.23	-0.03	0.04	0.01	-0.04	-0.125	-0.13	-0.09	0.23	-0.2	-0.59	-0.075	0.165	-0.145	-0.185
ADAM3A	-0.09	0.22	0.22	0.4	-0.22	0.25	0.04	0.32	-0.02	-0.27	0.08	0.02	-0.04	-0.13	0	0.51	-0.03	-0.02	0.16	-0.22	0.21	0.16	0.22	-0.13	0.12	NA	0.13	0.06	-0.13	-0.09	0.18	0.17	0.33	0.14	-0.04	0.5	-0.09	-0.13	-0.08	-0.04	0.04	0.03	-0.09	-0.05	0.5	-0.39	-0.36	-0.06	-0.35
ADAM7	-0.33	-0.5	NA	-0.59	-0.61	-0.77	0.12	-0.12	0.44	-0.33	0	-0.4	-0.48	-0.06	0.38	0.7	0.09	0.17	-0.28	-0.88	-0.1	-1.39	-0.28	-0.35	-0.06	0.04	-0.33	-0.43	0.02	-0.08	-0.98	-1.95	-0.55	-0.42	0.12	-0.16	0.17	-0.51	-0.19	0.73	NA	-0.08	-1	0.12	-0.4	0.5	NA	NA	0.36
ADAM8	0.08	0.13	-0.09	0.24	0.23	0.5	0.12	0.41	0.42	-0.07	0.03	0.15	-0.19	0.3	0.36	-0.64	0.54	0.25	-0.48	0.35	-0.71	0.23	-0.21	0.55	-0.48	-0.15	0.17	-0.2	-0.22	0.12	0.26	0.56	0.24	-0.08	0.66	-0.15	0.05	-0.17	0.18	-0.32	-0.04	-0.06	0.4	-0.05	-0.14	-0.32	-0.12	-0.03	0.27
ADAMDEC1	0.26	0.36	NA	NA	0.3	NA	NA	0.03	0.22	0.08	0.65	-0.2	-1.9	0.24	0.4	0.34	-0.01	0.08	0.04	0.13	-0.29	0.12	0.51	0.37	-0.33	0.13	0.15	0.03	0	0.3	-0.26	0.24	0.02	0.15	-0.07	0.08	0.33	-0.46	-0.07	0.12	-0.09	-0.05	0.92	-0.1	NA	NA	NA	NA	NA
ADAMTS1	0.21	0.035	0.385	-0.035	-0.47	0.105	-0.23	-0.02	0.015	0.06	0.1	0.125	0.405	-0.05	0.245	-0.375	-0.055	0.11	0.35	0.21	0.36	-0.025	0.255	0.285	0.84	0.33	-0.05	0.135	0.195	0.175	0.53	0.2	0.265	0.26	0.065	0.16	0.325	0.385	-0.17	0.175	-0.025	0.04	-0.075	0.165	0.15	-0.02	0.34	0.39	0.195
ADAMTS10	0.46	-0.22	-0.27	-0.15	0.41	-0.07	0.07	-0.19	0.09	-0.09	-0.19	-0.33	-0.25	-0.27	0.01	0.42	-0.05	-0.11	-0.35	-0.27	-0.66	-0.2	-0.24	-0.51	-0.32	-0.43	-0.27	-0.5	-0.2	-0.27	-0.05	-0.39	-0.38	-0.5	-0.03	-0.34	-0.37	-0.59	-0.28	-0.36	-0.12	-0.28	-0.24	-0.35	-0.46	-0.48	-0.27	0.13	-0.24
ADAMTS12	-0.28	0.12	0.2	0.1	0.46	0.29	-0.03	-0.06	0.71	-0.24	0.06	0.43	0.62	0.32	0.07	-0.28	0.47	0.38	-0.4	0.12	-0.43	0.77	0.55	0.27	-0.39	0.06	-0.04	-0.77	-0.22	0.13	0.16	0.15	-0.18	-0.19	0.31	-0.22	-0.12	-0.42	0.11	-0.66	0.14	0.13	0.09	-0.05	-0.38	0.3	-0.02	0.13	0.23
ADAMTS13	0.495	0.16	0.14	-0.21	-0.26	-0.2	0	-0.085	0.06	0.12	-0.02	-0.01	0.05	0.215	-0.035	0.17	0.165	0.065	0.06	-0.175	0.07	-0.36	-0.02	-0.04	0.185	0.095	0.1	0.17	0.27	0.18	-0.18	-0.21	-0.13	0.305	0.345	0.11	-0.07	-0.055	0.045	0.21	0.105	0.135	-0.065	-0.015	0.405	0.145	0.22	0.24	-0.03
ADAMTS14	-0.48	0.1	-0.18	-0.2	0.67	-0.13	0.01	0.1	0.22	0.06	0.24	0.09	0.13	-0.08	0	0.42	0.01	0.16	0.16	-0.17	0.06	-0.1	0.18	-0.14	0.11	0.09	0.07	-0.09	0.12	0.12	-0.21	-0.52	-0.09	-0.05	0.15	0.09	0.26	-0.05	0.08	0.14	0.23	0.07	0.43	0.04	-0.51	0.13	-1.06	0.04	0.26
ADAMTS16	-0.64	-0.57	-0.55	-0.42	-0.47	-0.48	-0.83	-0.42	0.12	-0.56	-0.58	-0.27	-0.17	-0.19	-0.47	0.4	-0.01	-0.42	-0.7	-0.07	-1.11	-0.15	-0.32	-0.01	-1.21	-0.7	-0.58	-1.38	-0.44	-0.72	-0.87	-0.36	-0.64	-0.83	-0.35	-0.98	-0.41	-0.73	-0.24	-0.71	-0.73	-0.66	-0.16	-0.54	-1.29	-0.54	-0.9	0.09	-0.41
ADAMTS2	0.185	-0.14	0.13	0.275	-0.075	0.455	0.165	0.135	0.355	-0.085	0.025	-0.015	-0.145	0.095	0.13	-0.625	0.43	0.005	-0.335	-0.415	-0.245	0.2	-0.28	0.525	-0.325	-0.205	0.055	-0.215	-0.22	-0.225	0.06	0.17	-0.265	-0.105	-0.045	-0.17	-0.195	0.17	0.145	-0.42	-0.005	-0.1	0.025	-0.065	0.345	-0.21	0.425	0.2	0.05
ADAMTS20	0.795	0.415	-0.07	0.06	0.19	0.09	0.09	0.17	-0.095	-0.075	0.185	0.17	-0.51	0.435	0.065	-0.26	0.125	0.075	-0.03	-0.45	-0.205	-0.145	-0.13	0.16	-0.24	0.02	0.17	0	0.17	0.1	-0.2	-0.165	0.31	0.125	0.025	0.085	0.11	0.24	0.125	0.355	0.06	-0.005	0.15	0.275	-0.035	0.21	0.18	0.27	0.995
ADAMTS3	0.31	-0.33	-0.15	0.08	-0.8	0.16	-0.25	-0.08	0.25	-0.27	-0.03	0.07	-0.26	0.14	0.03	0.17	0.1	-0.01	-0.12	-0.34	-0.37	-0.07	-0.32	-0.17	-0.55	-0.25	-0.19	-0.41	-0.34	-0.26	-0.32	-0.22	-0.48	-0.46	-0.08	-0.38	-0.26	-0.45	0.03	-0.24	-0.66	-0.08	-0.12	-0.19	-0.44	-0.13	-0.49	-0.65	-0.41
ADAMTS4	0.22	-0.11	0.21	-0.03	0.21	0.09	-0.11	-0.08	-0.06	0.08	-0.11	0.03	-0.33	0.21	-0.5	-0.03	0.23	-0.1	-0.26	0.05	-0.62	-0.03	-0.32	-0.04	-0.47	-0.4	-0.08	-0.11	-0.16	-0.24	-0.02	-0.22	-0.15	-0.31	-0.05	-0.11	-0.28	-0.08	0.26	0.68	-0.19	-0.16	-0.18	0.04	-0.44	0.08	-0.94	-0.47	-0.42
ADAMTS5	-0.35	-0.14	0.01	0.12	0.19	0.15	1.03	0.12	0.26	-0.1	-0.05	-0.11	0.06	0.22	0	0.55	0.53	-0.07	-0.45	-0.13	-0.82	0.34	-0.22	-0.11	-0.45	-0.37	-0.25	-0.64	-0.49	-0.31	-0.28	-0.29	-0.28	-0.28	0.17	-0.37	-0.31	-0.26	0.08	-0.18	-0.16	-0.18	-0.21	-0.35	-0.55	-0.33	-0.35	-0.18	-0.04
ADAMTS6	-0.51	0.02	-0.22	0	0.59	0.16	0.08	0	0.03	-0.17	0.065	-0.09	0.005	0.035	0.33	0.255	0.05	0.055	-0.155	0.165	-0.28	0.145	-0.22	0.085	-0.28	-0.13	-0.085	-0.125	-0.155	0.04	0.12	0.415	0.055	0.015	-0.065	-0.05	-0.09	-0.105	-0.075	0.065	0.24	-0.06	0.035	-0.04	0.31	0	0.035	-0.46	-0.245
ADAMTS7	-0.293333	-0.02	0.32	0.0166667	-0.113333	-0.01	-0.0666667	-0.0333333	0.103333	-0.13	0.03	-0.08	-0.0866667	0.0766667	-0.113333	-0.07	0.17	-0.0733333	-0.28	0.336667	-0.31	-0.0366667	-0.216667	0.15	-0.206667	-0.23	-0.0933333	-0.313333	-0.17	-0.106667	-0.123333	0.0433333	-0.0233333	-0.06	0.153333	-0.15	-0.2	-0.03	0.0266667	-0.08	-0.1	-0.0933333	-0.0233333	-0.243333	-0.116667	-0.306667	0.0566667	0.04	-0.2
ADAMTS8	0.16	0.25	-0.17	0.1	0.28	0.175	0.13	0.22	0.1	0.44	0.16	0.03	0.395	0.02	-0.335	-0.17	0.085	0.345	0.365	-0.465	0.09	-0.17	-0.065	-0.035	0.29	0.18	-0.02	0.35	0.16	-0.04	-0.07	0.105	0.505	0.11	0.4	0.115	-0.27	0.365	-0.12	-0.14	0.32	0.265	0.045	0.08	-0.55	0.565	0.23	NA	0.21
ADAMTS9	-0.475	0.1	0	0.15	0.59	0.545	-0.245	0.02	0.333333	0.0866667	0.343333	0	0.446667	0.065	0.17	-0.203333	-0.393333	0.116667	0.0533333	0.365	0.405	-0.01	0.376667	-0.173333	0.493333	0.565	-0.4	-0.07	0.0766667	-0.02	-0.16	0.63	0.165	0.04	0.19	0.0366667	0.03	0.125	0.0366667	0.325	-0.176667	-0.0233333	-0.365	0.085	0.3	0.305	-0.07	0.27	0.32
ADAMTSL1	0.09	-0.03	0.15	-0.055	0.495	0.595	-0.155	-0.055	0.16	0.43	-0.03	0.045	-0.165	-0.045	0.355	0.095	0.26	-0.005	0.145	-0.055	-0.04	-0.27	0.15	-0.49	0.155	0.345	0.005	0.02	0.13	0.005	0.6	0.79	0.095	-0.255	-0.005	-0.355	0.175	0.24	0.23	0.275	0.1	-0.07	0.71	-0.22	-0.14	0.485	0.745	0.1	-0.01
ADAMTSL2	-0.23	0	NA	-0.04	0.22	0.37	0.07	0.2	0.08	-0.32	0.32	-0.07	-0.59	0	-0.55	-0.01	0.06	0.03	-0.21	0.29	-0.68	0.34	0	0.17	-0.08	0.06	0.21	-0.11	0.32	0.24	0.27	0.27	0.56	0.28	0.13	0.07	-0.08	-0.03	0.05	0.22	0.15	0.05	0.78	0.1	-0.2	NA	NA	NA	0.2
ADAMTSL3	0.185	-0.095	-0.225	-0.19	-0.005	-0.09	-0.025	0.08	0.095	-0.075	0.02	0.09	0.095	-0.05	-0.18	0.335	0.135	0.06	0.005	0.055	-0.36	-0.03	0.185	-0.14	-0.325	-0.13	-0.12	-0.485	-0.19	-0.065	-0.26	-0.105	-0.165	-0.215	-0.095	-0.175	0.02	-0.44	0.075	-0.355	0.215	-0.03	0.03	-0.225	-0.655	0.085	-0.27	0.12	-0.18
ADAMTSL4	0.2875	-0.0125	-0.0075	0.03	-0.12	0.17	-0.2125	-0.0325	0.04	-0.15	-0.0275	-0.07	0.41	-0.1175	0.0225	0.1025	0.0375	-0.0275	0.045	0.065	-0.005	0.2125	0.165	0.3225	0.03	0.1275	-0.1775	-0.2225	-0.055	0.0225	0.255	0.125	0.0225	-0.115	0.0125	-0.1475	-0.015	0.1425	-0.1475	-0.37	0.0475	-0.0275	0.1425	-0.1025	0.2275	-0.0675	-0.2075	0.0975	0.05
ADARB1	-0.39	-0.11	-0.12	0.28	0.16	0.295	0.085	0.15	0.535	0.09	0.135	0.135	-0.26	0.175	-0.02	-0.05	0.265	0.095	-0.29	0.235	-0.36	0.095	-0.45	0.045	-0.525	-0.315	0.165	-0.015	-0.17	-0.115	0.25	0.08	0.075	-0.055	0.065	0.03	-0.24	0.035	0.3	0.325	-0.365	-0.04	0.405	-0.105	-0.08	0.05	0.115	-0.32	-0.055
ADARB2	NA	0.22	0.03	-0.15	-0.27	0.2	0.2	-0.19	0.12	0.11	0.24	0.25	-0.2	-0.06	0.03	-0.17	0.15	0.23	-0.16	0.06	-0.13	-0.32	-0.23	-0.15	-0.48	-0.06	-0.03	-0.11	NA	0.6	-0.11	0.04	-0.57	0.12	0.17	-0.06	-0.05	0.14	-0.09	-0.25	-0.06	0.22	-0.34	-0.03	-0.27	-0.7	NA	NA	NA
ADAT1	0.26	-0.1	-0.79	0.31	-0.23	0.34	0.2	0.21	0.26	0.08	-0.28	-0.17	-0.72	0.43	0.13	-0.11	0.02	0.03	-0.18	-0.11	-0.04	0.23	-0.46	0.94	-0.28	0.15	0.31	0.64	0.21	0.23	0.38	0.25	0.39	0.48	NA	0.67	0.17	0.29	0.58	1.04	0.13	-0.04	0.19	0.21	0.49	0.4	-0.22	NA	-1.4
ADC	0.77	-0.21	-0.11	-0.43	0.16	-0.39	-0.26	-0.14	-0.36	-0.17	-0.39	-0.35	-0.39	-0.38	-0.19	0.5	-0.43	-0.17	-0.24	-0.21	-0.36	-0.22	-0.03	-0.3	-0.31	-0.19	-0.4	-0.28	-0.35	-0.23	-0.01	-0.43	-0.16	0.16	-0.54	-0.25	-0.15	-0.7	-0.38	-0.29	-0.02	-0.32	-0.04	-0.24	-0.63	-0.36	-0.11	-0.43	-0.71
ADCK1	-0.22	-0.57	0	0.06	0.59	-0.16	-0.44	-0.07	-0.32	-0.37	-0.27	-0.41	-0.31	-0.44	0	-0.5	-0.38	-0.43	-0.37	0.34	-0.47	-0.11	-0.17	0.09	-0.47	-0.49	-0.4	-0.3	-0.23	-0.3	0.11	0.7	0.31	-0.41	-0.6	-0.33	-0.49	0.28	-0.54	-0.66	0.05	-0.44	-0.07	-0.26	0.06	-0.32	-0.26	0.03	-0.11
ADCK2	0.01	0.02	-0.34	0.3	-0.42	-0.27	-0.12	0.19	0.05	0.14	-0.26	0.05	0.01	0.04	0.31	0.07	-0.1	0.05	0.13	-0.58	0.02	-0.09	0.16	0.24	0.03	0.07	-0.07	-0.08	0.12	0.08	-0.37	0.1	-0.22	0.05	0.08	-0.03	-0.02	-0.17	0.16	-0.12	-0.18	-0.09	-0.07	0.17	0.08	-0.17	0.37	0.22	-0.27
ADCK4	-0.76	-0.01	NA	0.07	0.27	0.22	-0.17	-0.07	0.22	0.31	-0.09	0.15	-0.13	0.19	0.21	-0.15	0.31	-0.13	-0.45	-0.05	-0.83	NA	-0.3	0.14	-0.48	-0.45	-0.34	-0.42	-0.22	-0.05	0.51	0.14	0.34	0.08	-0.24	-0.29	-0.16	0.4	0.27	0.31	-0.81	-0.13	1.39	-0.29	1.01	0.61	NA	NA	NA
ADCY1	0.23	-0.17	-0.37	-0.04	-0.04	0.11	-0.31	0.36	0.18	0.03	-0.2	0.01	0.07	-0.01	-0.41	0.22	-0.09	-0.07	0.2	-0.5	-0.17	0.3	-0.11	-0.07	-0.13	-0.13	-0.08	-0.57	-0.14	-0.11	-0.36	-0.25	-0.29	-0.36	-0.21	-0.35	-0.05	-0.31	-0.12	-0.12	0.13	-0.18	0.41	-0.16	-0.13	-0.57	-0.06	-0.06	0.11
ADCY2	0.17	0.1	-0.0433333	-0.04	-0.316667	0.02	-0.02	0.0333333	0.123333	-0.00666667	0.11	-0.05	0.403333	0.0966667	-0.156667	0.0866667	-0.13	0.0533333	0.2	0.11	0.21	-0.0533333	0.106667	-0.0133333	0.226667	0.243333	0.0233333	-0.0666667	0.04	-0.04	0.04	0.0966667	-0.13	0.0766667	0.13	-0.0733333	0.233333	0.143333	-0.02	0.0466667	0.146667	0.12	-0.0666667	0.0466667	0.143333	-0.01	-0.133333	-0.213333	-0.0133333
ADCY3	-0.19	-0.47	-0.08	0	-0.36	0.01	-0.28	-0.22	-0.3	-0.5	-0.47	-0.36	-0.47	-0.5	-0.18	-0.5	-0.46	-0.51	-0.46	-0.2	-0.27	-0.44	-0.5	-0.02	-0.22	-0.5	-0.66	-0.32	-0.44	-0.48	0.09	-0.12	0.05	-0.41	-0.71	-0.26	-0.75	0.35	-0.59	-0.82	0.03	-0.52	0.01	-0.54	0.58	-0.19	-0.49	-1.19	-0.29
ADCY5	-0.16	0.13	0.28	0.09	0.1	0.13	0	0.45	-0.21	-0.28	0.26	0.2	0.86	0.19	0.55	-0.4	0.02	0.17	0.47	0.61	0.6	0.86	0.64	1	0.95	0.61	0.08	0.32	0.3	0.33	1.15	0.56	0.83	0.51	0.11	0.05	0.29	0.79	-0.2	0.08	0.1	0.19	0.47	0.06	0.4	0.32	0.4	-0.38	1.06
ADCY6	0.01	0.07	0.24	0.35	-0.05	0.16	0.22	-0.07	0.14	0.03	0.17	0.11	-0.32	0.09	0.01	-0.28	0.1	0.15	-0.2	0.34	-0.1	-0.11	-0.14	-0.1	0.1	-0.27	0.2	0.61	0	0.17	0.31	0.15	0.5	0.24	0.12	0.22	0.02	0.35	0.09	0.14	0.15	0.15	0.02	0.3	0.44	0.5	-0.01	0.21	0.08
ADCY7	-0.34	0.04	0.18	0.19	0.56	0.07	0.08	0.02	0.26	0.01	0.29	0.05	0.13	0.23	0.32	-0.39	0.2	0.02	-0.41	0.51	-0.57	0.23	-0.02	0.26	-0.42	-0.19	0.13	0.1	0.09	0.02	0.16	0.15	0.31	-0.08	0.07	-0.07	-0.05	0.09	0.07	-0.18	-0.07	0.01	0.23	0.02	0.01	-0.04	-0.14	0.16	0.09
ADCY9	NA	0.05	NA	0.34	0.14	0.31	0.2	0.52	0.05	-0.13	0.12	0.17	0.2	0.08	0.02	0.1	0.16	0.07	0.15	0.32	0.57	0.8	-0.03	-0.1	0.51	0.38	0.1	0.18	0.14	-0.2	0.33	1.09	0.16	0.26	0.07	-0.01	0.02	0.14	-0.2	-0.08	0.4	-0.01	NA	-0.09	NA	0.33	0.63	NA	0.44
ADCYAP1	NA	0.28	0.75	-0.21	-0.35	0.29	0.13	-0.29	-0.06	-0.09	-0.01	-0.01	-0.04	0.24	-0.07	NA	-0.05	-0.15	-0.22	-0.16	-0.06	0.27	-0.27	NA	-0.25	-0.11	-0.24	0	-0.02	0.19	-0.3	-0.07	0.55	0.05	-0.1	0.3	0.09	0.5	-0.02	-0.03	-0.09	-0.17	0.26	0.01	-0.6	0.26	NA	NA	0.17
ADCYAP1R1	-0.03	-0.14	0.07	-0.01	-0.47	0.15	-0.38	-0.26	0.31	-0.36	0.03	0.01	0.32	-0.29	-0.02	0.59	0.23	0.18	-0.44	0.2	-0.83	-0.12	-0.11	0.43	-0.77	-0.22	-0.26	-0.83	-0.27	-0.11	-0.09	-0.15	-0.16	-0.29	-0.15	-0.39	-0.06	-0.62	-0.26	-0.76	-0.29	-0.07	0.14	-0.3	-0.74	-0.73	-0.82	-0.55	-0.26
ADD1	-0.115	0.05	0.395	0.005	-0.425	-0.3	-0.18	-0.255	-0.005	-0.215	0.065	-0.115	0.355	-0.025	0.12	0.195	-0.035	-0.155	0.12	0.115	0.32	0.165	0.095	0.345	0.435	0.12	-0.09	-0.15	0.02	0.085	0.095	0.295	0.12	0.04	0.365	-0.175	0.235	0.12	0.075	0.335	0.1	0	-0.045	-0.055	-0.155	0.425	0.23	-0.09	0.205
ADD2	-0.143333	-0.0533333	-0.04	0.03	-0.196667	0.0166667	-0.18	-0.176667	0.223333	-0.0566667	-0.116667	-0.136667	-0.116667	-0.0766667	0.106667	-0.0466667	0.0933333	0.15	-0.173333	-0.143333	-0.203333	-0.02	-0.06	0.0966667	-0.183333	-0.12	0.00666667	-0.203333	-0.106667	-0.0433333	-0.0966667	-0.0366667	-0.136667	-0.253333	0.216667	-0.09	0.0366667	0.01	0.0466667	-0.193333	-0.05	-0.0733333	-0.113333	-0.0366667	-0.226667	-0.42	-0.213333	0.28	0.123333
ADD3	-0.38	0.34	-0.06	0.67	0.17	-0.87	0.55	0.18	-1.46	0.64	-0.36	-0.66	-0.07	-0.85	-0.03	-0.22	-1.48	-0.06	0.78	-0.18	0.93	-0.82	-0.13	-0.86	0.93	0.44	0.85	1.24	0.34	0.29	0.14	0.21	0.15	0.57	-0.21	0.71	0.27	0.06	-0.44	-0.31	0.57	-0.15	-0.31	0.53	1.41	-0.8	1.21	1.36	0.25
ADFP	-0.05	-0.04	0.13	0.06	0.47	0.17	0.35	0.24	0.31	0.05	0.33	0.08	-0.41	0.07	0.46	0.33	0.2	0.08	-0.02	-0.32	-0.36	0.6	-0.11	-0.1	-0.2	-0.11	0.42	0.24	0.02	0.05	0.16	-0.53	-0.25	0.1	0.03	0.05	-0.1	0.05	0.09	-0.08	0.18	0.13	0.09	0.09	-0.26	0.12	0.04	-0.07	-0.6
ADH1A	0.25	0.32	0.22	-0.12	-0.01	0.24	0.52	-0.07	0.02	0.21	0.13	0.07	0.22	0.35	0.7	0.08	0.35	0.1	0.11	0.41	-0.33	0.88	-0.47	0.83	-0.16	NA	0.16	0.47	0.23	-0.13	0.44	0.98	0.45	0.56	0.41	-0.09	0	0.41	0.21	0.29	0.85	0.32	0.37	0.51	0.71	0.52	0.66	NA	NA
ADH4	NA	-0.09	NA	NA	0.49	-0.05	0.3	-0.27	0.07	0.13	0.24	-0.01	-0.78	0.09	NA	NA	0.04	0.11	0.19	0.63	-0.37	NA	0.02	0.54	-0.06	0.09	0.09	0.43	-0.05	-0.06	-0.84	NA	-0.7	-0.08	-0.05	0.44	-0.15	NA	0.21	0.24	1.31	0.09	NA	0.19	NA	NA	NA	NA	NA
ADH5	0.13	0.36	0.78	0.05	-0.33	-0.62	0.51	0.54	-0.57	0.44	0.09	-0.27	-0.78	-0.46	-0.06	0.15	-0.6	-0.01	-0.2	0.66	0.46	-0.47	-0.59	-0.58	-0.39	-0.42	0.44	0.65	0.12	0.3	-0.11	-0.03	-0.07	0.32	-0.39	0.26	0.05	0.4	-0.08	-0.04	0.51	0.27	-1.12	0.49	0.55	-0.27	-0.05	-0.97	-0.48
ADH6	-0.0466667	-0.0666667	0.06	0.0666667	0.03	0.01	0.15	0.1	-0.113333	-0.03	0.0633333	-0.163333	-0.206667	-0.06	-0.01	-0.506667	-0.0733333	-0.05	-0.0466667	0.183333	0.153333	-0.216667	-0.0366667	0.14	0.0966667	-0.03	0.0266667	0.146667	-0.14	-0.193333	-0.0366667	0.306667	0.0433333	-0.0766667	-0.0233333	-0.143333	-0.223333	0.166667	-0.0433333	-0.03	0.236667	0.0166667	-2.88e-18	-0.00666667	-0.11	-0.25	0.15	-0.21	-0.163333
ADH7	-0.13	0.02	NA	-0.51	0.33	0.17	0.41	-0.11	0.11	0.42	0.13	0.46	-0.5	0.09	0.23	-0.07	0.27	0.19	-0.33	-1.23	-0.17	0.5	-0.06	0.01	0.1	NA	0.44	0.35	0.29	0.08	0.34	-1.03	-0.71	0.1	-0.01	0.19	-0.11	-0.06	0.46	0.25	1	0.25	0.02	-0.07	-0.77	0.24	0.8	1.51	0.14
ADI1	-0.1	0.17	0.31	0.29	-0.88	-0.2	0.16	0.69	-1.12	0.04	-0.59	-0.53	-0.12	-0.83	-0.52	-0.34	-0.96	0	0.43	0.57	0.78	-1.49	-0.76	0.22	0.13	0.38	0.01	1.12	0.14	0.08	-0.23	0.19	-0.39	0.51	-0.38	0.03	0	0.59	-0.35	-0.31	0.17	-0.43	-0.61	0.54	1.07	0.27	NA	NA	0.19
ADIPOQ	0.19	-0.31	-0.32	-0.42	-0.11	-0.45	0.19	-0.02	-0.36	0.06	0.11	-0.29	-0.38	0.08	-0.08	-0.24	-0.27	-0.24	0.1	-0.2	-0.05	-0.46	-0.32	-0.33	-0.11	-0.04	-0.04	0.31	-0.07	-0.16	-0.18	-0.32	-0.19	0.35	-0.2	0.04	-0.3	-0.06	0.04	0.46	0.3	-0.06	0.05	-0.06	-0.27	0.09	-0.11	-0.7	0.04
ADIPOR1	0.16	0.12	-0.29	0.35	-0.13	0.15	-0.01	0.01	0.09	-0.16	-0.29	-0.48	-0.3	-0.12	0.09	0.28	0.01	-0.17	-0.36	-0.51	-0.66	-0.1	-0.28	0.02	-0.64	-0.2	0.03	-0.16	-0.12	-0.09	0.02	-0.48	-0.41	-0.24	0.01	-0.3	-0.43	-0.47	-0.18	-0.26	-0.34	-0.44	-0.26	-0.22	-0.11	-0.52	-0.41	0.19	-0.18
ADIPOR2	0.145	-0.06	0.07	0.075	-0.105	0.1	-0.355	0.125	-0.235	-0.05	-0.185	-0.25	-0.285	-0.14	0.02	-0.16	-0.245	-0.24	-0.05	-0.25	-0.175	-0.42	-0.24	0.025	-0.16	-0.08	0.005	-0.125	-0.105	-0.125	0.005	-0.19	-0.065	0.095	-0.02	0.095	-0.085	-0.095	-0.175	-0.005	0.005	-0.235	-0.27	-0.13	0.225	-0.21	-0.365	0.115	-0.165
ADK	0.07	0.06	0.03	0.16	-0.55	0.24	0.11	0.2	0.44	-0.09	0.28	0.29	-0.16	-0.11	0.03	0.27	0.34	0.26	-0.35	0.21	-0.53	-0.01	-0.23	0.48	-0.78	-0.41	0.09	-0.22	0.01	0.02	-0.01	-0.08	-0.12	-0.07	0.04	-0.13	-0.08	-0.1	0.02	-0.3	-0.1	0.17	0.12	-0.14	-0.24	-0.02	-0.45	-0.51	-0.32
ADM	0.81	0.12	0.08	0.31	0.78	-0.35	0.03	0.21	-0.02	-0.03	-0.11	0.04	0	-0.2	0.14	0.55	0	-0.08	0.32	0.16	-0.08	-0.24	0.19	-0.12	0.23	-0.02	0.08	0.24	-0.03	0.24	-0.29	0	-0.36	0.06	0.04	0.05	-0.1	-0.06	-0.1	-0.16	-0.07	-0.08	0.18	-0.12	-0.12	-0.08	-0.18	0.04	-0.29
ADM2	-0.15	-0.13	-0.04	0.02	-0.1	0.32	0.05	0.02	0.09	0.05	0.06	-0.19	-0.54	0.02	0.01	0.26	0.3	-0.06	-0.4	-0.16	-0.61	0.01	-0.27	0.24	-0.54	-0.45	-0.06	-0.36	-0.21	-0.26	-0.15	0.02	-0.07	-0.23	-0.02	-0.22	-0.08	-0.1	0.05	-0.07	-0.12	-0.1	0.07	-0.21	-0.15	-0.2	-0.62	0.04	-0.18
ADMR	-0.07	-0.05	-0.06	0	0.19	0	-0.17	0.03	-0.51	-0.14	-0.22	-0.27	-0.49	0.16	0.11	-0.59	-0.09	-0.16	-0.5	0.23	-0.23	-0.3	-0.56	0.03	-0.13	-0.33	-0.13	0.15	-0.28	-0.04	0.21	0.4	0.38	-0.03	-0.13	-0.11	-0.12	0.12	-0.03	0.19	0.48	0.02	0.07	-0.13	0.4	-0.33	-0.18	-0.99	-0.55
ADNP	-0.27	0.11	NA	-0.11	-0.34	-0.9	-0.09	-0.38	0.12	-0.02	-0.03	-0.04	-0.25	-0.02	0.46	0.19	0.13	0.02	-0.41	0.46	-0.43	-0.43	0.2	-0.33	-0.44	-0.3	0.06	0.13	0.01	0.09	-0.24	-0.73	0.14	-0.04	-0.12	0.03	0.22	0.05	-0.06	-0.19	-0.35	0.03	0.92	0.1	-0.18	NA	NA	NA	NA
ADORA1	0.205	-0.125	-0.005	0	-0.14	0.025	-0.205	-0.145	0.025	-0.11	-0.135	-0.245	-0.235	0.01	-0.005	0.25	0.065	-0.08	-0.24	-0.22	-0.42	-0.06	-0.165	-0.195	-0.415	-0.285	-0.23	-0.28	-0.315	-0.355	-0.18	-0.36	-0.385	-0.14	-0.105	-0.255	-0.145	-0.325	0.01	-0.145	-0.115	-0.145	0.01	-0.27	-0.01	-0.23	-0.45	-0.535	-0.435
ADORA2A	-0.29	0.07	-0.27	-0.11	0.16	-0.06	0.42	0.05	-0.01	0.24	0.08	0.12	-0.4	0.09	0.44	-0.12	0.12	0.07	0.1	0.13	-0.01	-0.17	-0.05	-0.22	0.05	0	0.22	0.39	0	0.1	-0.64	-0.33	-0.02	0.2	0.18	0.08	-0.16	-0.46	-0.06	0.02	-0.35	-0.18	-0.11	0.01	-1.02	-0.08	NA	-0.28	0.15
ADORA2B	-0.01	0.1	-0.25	0.03	0.08	0.04	0.21	-0.14	0.16	-0.03	0.2	0.13	-0.03	0.17	0.03	0.06	0.32	0.11	-0.24	0.33	-0.44	0.23	0.09	0.58	-0.28	-0.19	0.04	-0.32	-0.04	0.03	-0.17	-0.53	0.09	0.27	0.04	0.01	-0.21	-0.4	0.16	-0.07	-0.1	0.09	0.05	-0.17	-0.82	-0.12	-0.04	-0.06	-0.03
ADORA3	0.06	-0.573333	-0.133333	-0.53	-0.54	-0.266667	-0.48	-0.393333	-0.383333	-0.393333	-0.526667	-0.463333	-0.183333	-0.343333	-0.356667	0.57	-0.45	-0.516667	-0.37	-0.593333	-0.226667	-0.246667	-0.253333	-0.336667	-0.15	-0.26	-0.293333	-0.186667	-0.32	-0.443333	-0.0833333	0.03	-0.28	-0.366667	-0.596667	-0.13	-0.436667	-0.466667	-0.396667	-0.453333	-0.01	-0.466667	-0.0466667	-0.133333	0.11	-0.316667	-0.21	0.03	-0.443333
ADPGK	0.47	0.12	0.39	0.54	-0.7	-0.75	-0.21	0.22	-0.37	-0.22	-0.64	-0.51	-0.28	-0.11	0.01	-0.37	-0.87	-0.15	0.39	0.11	0.57	-0.65	0.1	-0.23	0.45	0.27	-0.3	0.51	0.31	0.06	-0.23	-0.07	-0.11	0.12	0.26	-0.06	0.3	0.05	-0.07	0.29	-0.37	-0.16	-0.81	0.12	0.13	-0.86	0.41	NA	NA
ADPRH	-0.08	-0.02	NA	-0.03	-0.01	0.19	0.02	0.42	0.17	-0.05	-0.02	-0.09	0.08	0.1	-0.66	-0.1	-0.08	0.21	-0.85	-0.46	-0.9	0.39	-0.16	-0.12	-0.21	-0.1	-0.03	0.02	0.03	0.05	0.18	0.06	-0.03	-0.27	0.06	0.09	-0.1	NA	0.15	0.06	-0.17	0.12	1.01	0.11	NA	-0.22	0.64	NA	-0.32
ADPRHL1	-0.05	0.08	-0.03	-0.12	0.49	0.08	0.04	0.18	0.08	-0.13	0.1	-0.04	0.23	0.09	0.12	-0.27	0.13	-0.07	-0.13	-0.02	-0.18	0.26	0.34	0.24	-0.21	-0.05	-0.1	-0.12	-0.16	-0.03	0.54	0.16	0.02	-0.12	0.04	0.02	0.04	0.12	-0.04	-0.19	-0.3	-0.03	0.31	-0.1	0.34	0.03	-0.01	0.07	-0.24
ADPRHL2	-0.13	-0.19	-0.09	-0.03	0	0.19	0.14	0.17	-0.23	0.03	-0.01	-0.17	0.14	0.03	0.12	0.2	-0.13	0.02	0.16	-0.16	0.39	-0.23	-0.15	-0.2	0.18	-0.01	0.02	0.21	0.07	0.06	0.18	0.33	-0.12	0.12	0.02	-0.21	-0.09	0.13	0.07	0.11	-0.25	-0.02	-0.06	NA	0.5	0.16	0.56	NA	-0.26
ADRA1A	0.35	0.0075	-0.0325	-0.1425	-0.0525	-0.1575	-0.0325	0.04	0.06	0.0125	-0.0425	-0.0275	-0.1	-0.075	-0.1975	0.0975	-0.025	0.025	-0.025	-0.12	-0.1275	-0.0575	-0.14	-0.0575	-0.18	-0.0825	-0.065	-0.1975	0.0666667	0.0075	-0.1125	-0.1625	-0.13	-0.1575	-0.05	-0.115	-0.1125	-0.1025	-0.08	-0.105	-0.065	-0.025	-0.035	-0.15	-0.25	-0.2775	-0.4975	-0.153333	-0.1075
ADRA1B	0.27	0	0.51	0.15	0.02	0.16	0.2	0.11	0.35	0.19	0.34	0.29	0.04	0.05	0.05	-0.04	-0.05	0.11	0.13	0.28	-0.06	0.37	0.06	-0.02	-0.01	0	0.17	0.25	0.1	-0.03	0.34	0.22	0	0.27	0.3	0.2	-0.03	0.2	0.1	0.14	0.52	0.28	0.25	0.05	-0.04	-0.08	-0.04	0.29	0.05
ADRA1D	0.42	-0.98	-0.07	0.05	0.3	0.07	-0.92	0.33	-0.87	-0.72	-0.68	-0.73	-0.31	-0.76	0.29	-0.32	-0.7	-1.01	-0.47	0.12	-0.47	0	-0.23	-0.08	-0.84	-0.5	-0.67	-0.94	-0.69	-0.89	0.32	0.55	0.36	-1.08	-1.49	-1.2	-0.98	0.11	-1.02	-1.24	0.33	-0.96	-0.04	-0.51	0.11	-0.27	-0.28	0.46	-0.17
ADRA2A	0.54	-0.1	0.13	-0.15	-0.47	0	-0.06	0.12	-0.29	-0.14	-0.22	-0.18	-0.52	0.06	0.2	-0.15	-0.02	-0.39	-0.43	-0.04	-0.27	-0.29	-0.69	0.12	-0.24	-0.22	-0.43	0.15	-0.11	-0.14	-0.07	-0.34	-0.01	-0.29	-0.27	0.28	-0.05	-0.02	0.26	0.49	0.48	0.07	-0.47	-0.31	0.29	-0.25	-0.61	-0.46	-0.4
ADRA2C	-0.11	0.03	-0.2	0.04	-0.06	-0.12	-0.15	-0.1	-0.2	0.03	-0.18	-0.12	-0.21	0.06	-0.16	0.19	-0.1	0.02	0.02	-0.7	0.24	-0.28	-0.01	-0.68	0.15	-0.08	0.1	0.05	-0.07	0.2	-0.1	-0.31	-0.07	-0.03	-0.09	-0.19	-0.12	-0.25	0.02	0.21	-0.08	-0.07	-0.15	-0.05	0	-0.01	0.04	0.16	-0.03
ADRB1	0.11	0.17	0	-0.06	0.3	-0.14	0.12	-0.02	0.42	-0.12	0.28	-0.05	-0.15	0.05	0.13	0.26	0.13	-0.05	0.01	0.62	-0.38	0.32	0.13	0.21	-0.45	-0.02	0.02	-0.07	0.08	0.08	-0.12	0.32	0.02	-0.02	0.05	-0.03	0	-0.3	0.05	-0.14	0.04	-0.02	-0.23	-0.03	-0.72	NA	-0.1	-0.44	-0.5
ADRB2	0.355	0.1	-0.0166667	-0.0366667	-0.35	-0.075	0.16	-0.07	-0.17	0.136667	-0.055	-0.03	0.065	-0.246667	-0.183333	-0.286667	-0.22	0.0233333	0.106667	0.28	0.02	0.02	0.21	0.0166667	0.025	0.266667	-0.06	0.0566667	-0.035	0.32	0.00333333	0.263333	0.276667	-0.03	0.11	-0.155	0.02	0.07	0.0366667	-0.203333	0.18	0.025	0.09	-0.0466667	-0.225	-0.116667	-0.0366667	-0.206667	-0.173333
ADRB3	0.86	-0.25	0.17	-0.15	0.25	-0.23	0.03	0.13	-0.04	0.17	-0.25	-0.49	-0.53	-0.13	-0.25	-0.07	-0.11	-0.13	-0.47	0.46	-0.34	0.11	-0.58	-0.04	-0.47	-0.48	0.03	0.01	-0.18	-0.35	-0.36	-0.32	-0.05	-0.08	-0.19	-0.19	-0.37	0.01	-0.05	0.09	0.18	-0.29	0.05	-0.23	-0.01	-0.31	-0.27	-0.68	-0.14
ADRBK1	NA	0.37	NA	0.31	-0.14	0.23	-0.54	-0.79	NA	NA	NA	0.08	NA	NA	0.43	0.34	-0.36	-0.65	0.25	0.03	NA	NA	-0.48	-0.99	NA	0.37	NA	NA	0.53	NA	NA	0.2	NA	-0.25	1.13	NA	0.16	-0.05	NA	NA	-1.28	-0.03	NA	NA	NA	NA	NA	NA	NA
ADRBK2	-1.05	0.11	NA	0.1	NA	0	0.12	0.44	-0.18	0.1	0.35	0.35	0.05	0.23	-0.04	0.15	-0.04	0.29	0.11	-0.22	0.04	0.53	0.23	0.07	0.04	NA	0.17	0.15	0	0.09	0.33	-0.56	-0.11	0.18	-0.02	0.06	0.16	0.29	0.14	-0.04	-0.68	0.2	-0.38	0.48	0.45	0.38	-0.15	NA	0.68
ADRM1	-0.3	0.1	-0.15	0.06	-0.72	-0.25	0.08	0.61	-0.18	0.34	0.07	-0.03	-0.08	-0.02	-0.11	-0.39	0.08	0.09	-0.14	0.16	-0.36	0.15	-0.52	0.57	NA	-0.34	-0.04	0.25	-0.01	0.28	0.04	NA	0.21	0.08	0.02	0.28	0.17	0.19	0.3	0.19	0.04	0.16	0.04	-0.06	0.07	-0.31	0.46	NA	0.37
ADSL	0.1	0.11	0.59	0.09	0.04	-0.26	0.38	-0.1	-1	0.18	0.18	-0.28	-0.65	-0.69	-0.18	-0.21	-0.87	-0.18	0.11	-0.16	0.48	-0.36	-0.47	-0.33	-0.2	-0.17	0.19	0.67	-0.09	0.17	-0.15	-0.36	-0.52	0.1	-0.68	0.22	-0.15	0.24	-0.5	-0.22	0.32	0.25	-0.13	0.32	0.53	-0.36	-0.02	-0.88	-0.54
AEBP1	-0.11	0.16	0.33	0.14	-0.34	0.46	-0.13	0.01	0.26	0.03	0.45	0.17	-0.03	0.04	-0.06	-0.17	0.04	0.18	-0.12	0.19	-0.35	0.19	-0.27	0.61	NA	0.05	-0.07	0.06	0.32	0.03	0.39	NA	0.83	0.12	0.22	0.35	0.04	0.17	0.21	0.71	0.3	0.04	0.19	-0.15	0.33	0.04	0.77	NA	0.28
AES	-0.15	0.09	-0.27	-0.19	-0.15	-0.36	0.35	0.2	0.52	0.27	0.41	0.02	-0.47	0.38	0.16	-0.07	0.44	0.06	-0.08	0.71	-0.4	0.26	0.2	0.32	-0.26	-0.19	0.22	0.03	0.01	0.02	-0.21	-0.17	-0.32	0.27	0.17	0.23	-0.29	0.32	0.43	0.43	0.4	0.12	0.09	-0.05	-0.55	-0.38	0.4	NA	0.34
AFAP1	-0.29	0.035	-0.295	0.29	-0.13	-0.01	0.105	-0.085	-0.095	0.28	-0.14	-0.285	-0.04	0.19	-0.2	0.045	0.215	0	-0.075	-0.395	-0.11	-0.1	-0.355	0.05	-0.085	-0.11	-0.08	0.06	-0.2	-0.185	-0.05	-0.175	-0.345	-0.145	0.065	0.015	-0.02	0.22	0.255	0.375	0.04	-0.03	-0.23	-0.27	-0.03	0.225	-0.05	-0.91	-0.18
AFAP1L2	-0.11	-0.09	0.29	-0.02	-0.6	0.4	-0.27	-0.08	0.04	0.16	-0.01	0.22	0.03	-0.08	0.05	-0.03	0.14	0.07	-0.19	-0.18	-0.23	0	0.09	0.34	0.15	-0.06	0.09	-0.29	-0.09	-0.22	0.1	0.02	-0.03	-0.1	-0.19	0.06	0.11	-0.16	0.09	-0.2	0.38	0.09	0.14	-0.25	0.14	-0.26	0.05	-0.59	0.24
AFF1	-0.08	0.15	-0.26	-0.09	0.11	-0.26	0.14	-0.11	0.31	0	0.13	-0.13	-0.77	0.4	-0.21	0.02	0.27	-0.11	-0.28	0.28	-0.31	-0.03	-0.28	-0.39	-0.35	-0.38	-0.05	-0.1	-0.12	-0.13	3.55	-0.43	-0.16	-0.06	0.17	0.16	-0.25	-0.01	0.27	0.76	0.12	-0.02	0.36	-0.08	-0.07	-0.37	-0.26	-0.52	-0.06
AFF2	-0.2	-0.06	-0.47	0.37	0.31	-0.14	-0.02	1.03	0.17	0.01	0.15	-0.06	-0.19	0.13	0.68	-0.18	0.13	0.17	-1.44	0.57	-0.78	-0.09	-0.5	0.05	-0.41	-0.65	0	0.18	-0.08	-0.09	0.04	-0.03	0.28	0.08	0.05	-0.13	-0.02	0.37	0.19	0.01	0.27	0.11	0.84	-0.02	-0.31	-0.29	NA	NA	-0.29
AFF4	NA	0.48	NA	0.48	0.69	NA	NA	NA	0.01	0.88	0.39	0.05	-0.19	0.6	NA	NA	0.35	0.28	0.87	NA	0.48	NA	0.44	NA	-0.07	0.22	NA	0.37	0.15	0.1	0.63	NA	NA	-0.05	NA	NA	0.95	NA	-0.03	0.26	NA	-0.46	NA	-0.1	NA	NA	NA	NA	NA
AFG3L1	-0.305	-0.045	0.02	0.045	0.29	0	0.055	0.005	-0.115	-0.26	0.02	-0.12	0.28	-0.085	-0.015	-0.045	0.005	-0.045	0.065	-0.17	0.285	-0.255	-0.03	-0.15	0.175	0.175	-0.09	-0.185	-0.03	-0.02	0.07	-0.2	0.19	0.02	-0.005	-0.005	-0.055	-0.055	-0.03	-0.18	-0.175	0.125	-0.175	0.03	0.095	-0.295	-0.335	-0.34	-0.24
AFM	NA	-0.22	0.27	NA	-0.15	-0.14	-0.55	-0.19	0.38	-0.29	0	0.03	0.12	-0.06	0.33	-0.04	0.11	0.24	0.01	-0.15	-0.43	0.21	0.24	1.4	-0.17	-0.06	-0.25	-0.63	-0.31	-0.04	-0.22	-0.61	-0.6	-0.21	-0.05	-0.16	-0.11	0.31	0.02	-0.45	NA	0.03	NA	-0.12	NA	-0.54	NA	NA	NA
AFMID	1.22	-0.22	-0.21	-0.09	-0.47	0.07	-0.43	-0.07	0.09	-0.24	-0.18	-0.12	0.18	-0.24	-0.07	0.68	-0.06	0.04	-0.38	-0.43	-0.6	0.07	0.06	-0.03	-0.57	-0.37	-0.35	-0.73	-0.14	-0.2	0.12	-0.22	-0.32	-0.34	-0.31	-0.21	-0.24	-0.58	-0.45	-0.54	0.21	-0.21	-0.13	-0.26	-0.46	-0.29	-0.31	-0.11	-0.06
AFP	2.14	-0.22	0.41	0.29	-0.9	-0.42	-0.18	0.06	0.16	-0.21	0.12	-0.1	-0.3	0.04	0.44	0.12	0.08	-0.03	0.21	-1.09	-0.2	-0.34	NA	-1.04	0.12	-0.64	0.07	0.18	0.26	0.31	-0.16	NA	-0.19	0.09	0.25	0.4	-0.07	-0.14	0.19	0.18	-0.62	-0.07	0.15	0.16	0.03	-0.5	0.81	NA	NA
AFTPH	0.153333	-0.236667	0.0933333	-0.22	-0.36	-0.336667	-0.153333	-0.283333	-0.24	-0.16	-0.0733333	-0.253333	0.0833333	-0.39	-0.1	-0.216667	-0.27	-0.19	0.0866667	0.0133333	0.126667	-0.323333	-0.06	-0.173333	0.0266667	-0.01	-0.03	0.0266667	0.00333333	-0.14	-0.193333	-0.103333	-0.0933333	-0.0633333	-0.323333	-0.1	-0.00666667	-0.0566667	-0.26	-0.246667	-0.306667	-0.103333	-0.06	-0.123333	-0.48	-0.133333	-0.126667	-0.58	-0.113333
AGA	-0.53	0.01	-0.05	-0.03	-0.17	-0.14	0.06	-0.02	0.02	-0.16	-0.02	0.03	0.16	-0.11	-0.01	-0.17	-0.04	-0.09	-0.29	0.51	-0.43	0.51	0.01	-0.68	-0.36	-0.19	0.06	0.1	-0.1	0.01	0.22	0.24	0.07	-0.01	-0.39	0.2	-0.38	-0.05	-0.03	-0.47	0.26	-0.17	0.01	-0.15	0.09	-0.06	-0.04	-0.97	-0.03
AGBL1	-0.25	0.01	NA	-0.41	0.62	-0.33	-0.07	0.5	0.74	0.48	0.35	0.3	0.58	0.43	-0.47	-1.02	0.14	0.05	-0.01	1	0.18	0.7	0.6	NA	0.15	0.18	0.58	0.4	-0.08	0.03	0.64	0.4	0.96	0.09	0.22	NA	0.41	0.25	0.85	0.85	0.5	0.16	-0.49	0.03	NA	0.54	-0.27	0.76	0.61
AGBL2	-0.35	-0.27	-0.23	-0.01	1.02	-0.32	0.12	0.06	-0.18	NA	-0.11	0.34	-0.35	0.15	0	-0.21	-0.15	-0.07	0.09	0.4	0.14	0.33	-0.34	-0.34	0.01	0.1	0.02	0.14	-0.25	0.06	0.34	-0.06	0.11	0.05	-0.04	-0.37	0.01	0.01	-0.2	0.31	0.28	0.07	0.32	-0.18	0.4	-0.18	0.28	-1.21	-0.71
AGBL3	NA	0.15	NA	0.37	0.11	0.84	0.13	NA	0.12	0	0.28	0.27	-0.01	-0.02	NA	0.16	0.24	0.23	-0.48	-0.24	-0.46	0.31	-0.75	-0.81	-0.52	-0.21	0.29	0.14	-0.1	0.07	0.78	0.27	0.4	0.06	-0.02	0.1	0.11	0.99	0.21	-0.09	0.14	0.13	-0.66	0.05	NA	0.72	NA	NA	NA
AGBL4	-0.2	-0.06	-0.07	0.04	0.49	-0.13	0.1	-0.1	-0.04	0.02	0.04	-0.15	0.01	0.03	-0.03	0.45	0	0.08	-0.06	-0.29	-0.16	-0.16	-0.03	0.27	-0.09	-0.19	0.18	0.01	0.02	0.03	-0.04	-0.18	-0.36	0.04	0.11	0.14	-0.26	-0.09	0	0.11	-0.12	-0.07	-0.37	-0.04	-0.24	-0.29	-0.38	-0.15	-0.04
AGBL5	0.29	-0.3	-0.05	-0.13	0.175	-0.14	-0.215	-0.15	-0.065	-0.21	-0.265	-0.175	0.1	-0.165	-0.14	-0.1	-0.135	-0.22	-0.295	-0.115	-0.305	0.295	0.15	-0.015	-0.23	-0.095	-0.265	-0.425	-0.305	-0.205	-0.055	-0.265	0.13	-0.255	-0.18	-0.405	-0.165	-0.34	-0.2	-0.3	-0.24	-0.18	0.085	-0.285	-0.345	-0.315	-0.2	0.005	-0.145
AGER	-0.475	0.075	-0.165	0.25	0.3	0.25	0.085	0.115	0.005	-0.095	0.21	0.235	0.405	0.095	0.09	-0.11	0.085	0.12	0.1	0.145	0.17	0.285	0.225	0.255	0.19	0.16	0.115	-0.09	-0.03	0.08	0.24	0.12	0.15	0.1	0.02	0.235	0.035	0.435	0.085	-0.23	0.01	0.16	0.11	0.06	0.24	0.3	-0.08	0.12	0.23
AGGF1	0.24	0.103333	0.235	-0.196667	-0.09	0.15	0.47	-0.07	-0.265	0.355	0.13	0.105	0.0866667	-0.343333	-0.22	-0.08	-0.496667	0.31	-0.06	0.376667	0.09	0.36	-0.0833333	-0.116667	0.24	0.31	0.283333	0.415	0.055	0.025	0.526667	0.7	0.01	0.316667	-0.0166667	0.34	0.156667	0.133333	-0.16	-0.08	-0.156667	0.32	0.0133333	0.305	0.453333	-0.123333	0.495	-0.32	-0.09
AGK	0.145	-0.1	0.185	0.305	0.155	0	-0.255	0.455	0.32	-0.095	0.035	0.25	-0.095	0.26	0.09	-0.08	0.2	-0.07	-0.065	0.005	-0.11	0.555	0.295	-0.48	-0.345	0.02	0.06	-0.165	0.105	0.075	0.105	0.675	0.45	-0.09	-0.04	-0.13	-0.12	0.34	-0.045	-0.105	0.28	0.055	0.155	0.355	0.21	-0.1	0.465	1.11	0.19
AGL	0.72	0.23	0.11	0.46	0.25	0.04	0.14	1	0.14	0.22	0.08	0.06	-0.56	0.15	-0.54	-0.13	0.26	0.19	-0.23	0.43	-0.7	1.03	-0.42	0.25	-0.12	-0.08	0.25	0.31	0.36	0.28	0.09	0.02	0.61	0.11	-0.11	0.09	-0.14	0.27	0.25	0.51	0.17	0.04	0.29	0.12	-0.75	0.64	NA	NA	1.4
AGMAT	1.04	0.14	0	-0.52	0.03	-0.21	0.24	-0.11	-0.53	0.06	-0.18	-0.2	-0.84	0.28	0.15	-0.26	-0.22	-0.04	-0.03	-0.24	-0.19	-0.33	-0.49	-0.58	0.11	-0.35	-0.02	0.24	-0.2	-0.14	-0.09	-0.65	-1.42	0.02	-0.16	0.15	-0.17	0	0.21	0.22	-0.07	-0.01	0.3	-0.17	-0.17	-0.14	0.02	-1.02	-0.3
AGPAT1	-0.225	-0.03	0.16	-0.05	0.405	-0.175	0.205	-0.08	-0.16	0.11	0.175	-0.195	0.07	0.16	-0.195	-0.175	0.12	-0.06	-0.085	0.25	-0.035	0.025	-0.16	-0.45	0.13	0.055	0.045	0.31	-0.05	-0.13	0.155	-0.1	0.18	0.05	0.04	0.065	-0.08	0.165	0	-0.11	0.14	0.04	-0.21	-0.085	0.045	0.06	0.31	0.12	0.235
AGPAT2	-0.04	-0.24	0.4	0.02	-0.19	0.26	-0.27	0.41	0.27	-0.31	0.24	0.52	0.05	0.27	0.02	-0.49	0.07	0.02	0.08	0.18	-0.2	0.31	0.07	0.13	-0.34	0.11	0.1	-0.41	0.33	0.16	-0.08	0.66	0.08	-0.3	-0.07	-0.31	-0.07	-0.18	-0.09	-0.9	-0.4	-0.08	-0.13	0.33	0.03	0.41	0.13	0.84	0.56
AGPAT3	0.0166667	0.0625	-0.165	-0.0375	-0.06	-0.17	-0.0625	-0.0666667	-0.14	-0.0025	-0.0775	-0.1325	0.116667	-0.085	-0.1175	-0.105	-0.1625	-0.0875	0.0425	0.135	-0.1975	0.01	-0.0525	-0.0525	0.04	-0.09	-0.0975	-0.0075	-0.01	-0.0125	-0.015	-0.12	0.07	-0.0325	0.0075	-0.1425	0.02	0.0225	-0.0325	-0.035	0.28	-0.045	-0.03	-0.3	0.116667	0.363333	0.386667	0.135	0.333333
AGPAT4	0.49	0.05	0.106667	-0.0966667	0.0366667	0.0366667	0.095	0.0833333	0.0433333	0.00666667	0.04	0.08	0.0266667	-0.123333	0.166667	-0.113333	0.1	0.196667	0.273333	0.163333	-0.12	-0.0566667	-0.08	-0.0566667	-0.26	-0.02	0.115	-0.09	-0.045	0.165	-0.0333333	0.0933333	0.16	0.095	0.3	-0.0566667	0.02	0.146667	-0.0533333	-0.045	-0.0566667	0.015	0.04	-0.015	-0.43	-0.135	-0.13	-0.16	0.16
AGPAT5	-0.11	-0.22	-0.18	0.1	-0.1	0.21	-0.12	0.06	0.23	-0.19	0.07	0.02	-0.25	-0.07	0.13	-0.08	0.1	-0.03	-0.3	0.29	-0.2	0.15	-0.08	0.02	-0.04	0	0.01	-0.19	-0.11	0.09	-0.02	0.24	0.37	-0.16	0.07	-0.16	-0.23	-0.26	-0.17	-0.51	-0.18	-0.1	-0.01	0	-0.26	0.31	0.06	0.34	-0.22
AGPAT6	-0.37	-0.05	-0.28	0.16	-0.37	-0.33	-0.16	-0.14	-0.47	0.08	-0.48	-0.37	-0.27	-0.07	0.03	-0.2	-0.32	-0.19	-0.12	-0.12	0.23	-0.41	-0.17	-0.69	0.38	0.08	-0.09	0.03	0.04	-0.09	-0.4	0.12	-0.15	-0.2	0.07	0.03	-0.35	0.08	0.08	0.07	0.08	-0.16	-0.16	-0.26	0.11	0.12	0.03	0.29	0
AGPAT7	-0.005	-0.11	-0.115	-0.12	0.055	-0.19	-0.23	-0.195	-0.06	-0.125	-0.125	-0.065	-0.305	-0.03	-0.195	0.3	-0.12	-0.2	-0.04	-0.005	-0.225	-0.09	-0.22	-0.31	-0.315	-0.19	-0.145	-0.26	-0.165	-0.11	-0.15	-0.295	-0.28	-0.07	-0.08	-0.185	0.055	-0.255	-0.05	-0.08	-0.09	-0.09	0.09	-0.16	-0.215	-0.085	-0.185	-0.03	-0.295
AGPS	-0.37	-0.03	NA	0.29	0.23	0.27	0.18	0.22	-0.68	-0.34	0.19	0.02	0.27	0.15	-0.48	-0.55	-0.07	0.16	0.07	0.35	0.85	0.13	-0.08	0.52	0.76	0.68	0.05	0.34	-0.11	0.15	0.64	0.83	-0.13	0.47	-0.24	-0.14	-0.04	0.22	-0.08	0.03	0.38	-0.11	-0.62	0.74	0.27	0.7	0.04	0.88	NA
AGR2	NA	-0.05	1.24	0.12	0.18	NA	-0.54	NA	0.22	-0.34	0.14	0.25	-0.73	-0.13	0.48	NA	0.19	-0.02	-0.43	0.02	-0.08	-0.45	-0.46	0.47	0.06	-0.31	-0.09	0.1	0.02	0.44	-0.26	-0.75	0.68	-0.06	-0.06	-0.13	0.46	0.37	-0.1	0.91	1.22	0.22	0.02	0.32	NA	0.67	NA	NA	NA
AGRN	-0.04	-0.17	-0.0833333	0.05	-0.133333	0.173333	-0.353333	-0.13	0.13	-0.243333	-0.06	0.213333	0.00666667	0.133333	-0.0133333	0.233333	0.253333	-0.13	-0.206667	0.0833333	-0.09	-0.02	-0.13	-0.0966667	-0.155	-0.03	-0.23	-0.6	-0.19	-0.186667	-0.136667	0.0466667	-0.0533333	-0.353333	0.07	-0.17	0.0333333	-0.373333	0.0266667	-0.25	-0.303333	-0.17	0.233333	-0.206667	-0.176667	-0.473333	-0.363333	0.18	-0.116667
AGT	0.01	-0.22	0.07	-0.28	-0.94	0	-0.08	-0.29	0.23	-0.25	-0.17	0.2	0.24	0.47	-0.12	0.63	0.19	0.09	-0.17	-0.32	0.13	0.1	0	0.05	0.39	0.03	-0.08	0.21	0.23	0.09	0.06	-0.24	-0.19	0.08	0.31	0.12	-0.04	0.16	0.49	0.46	0.05	0.21	0.05	0.23	0.33	-0.06	-0.03	-0.18	-0.08
AGTPBP1	-0.04	-0.13	-0.21	0.02	0.25	-0.81	0.09	0.24	-0.97	-0.29	0.17	0.2	-0.73	-0.57	-0.15	-0.57	-0.76	-0.17	0.16	0.67	0.07	-0.22	-0.78	-0.29	-0.1	-0.28	0.16	0.72	-0.03	0.07	0.29	1.07	0.46	0.38	-0.38	0.07	-0.1	0.17	-0.2	0.1	0.49	0.36	-0.37	0.35	0.48	0.09	-0.19	0.32	-0.64
AGTR1	1	0.14	0.185	0.13	-0.125	0.2	0.39	0.045	0.59	0.36	0.36	0.04	-0.275	0.035	-0.055	0.34	0.35	0.395	-0.21	0.13	-0.06	0.085	-0.205	-0.135	-0.06	-0.22	0.28	-0.06	0	-0.15	0.07	-0.35	-0.035	0.06	0.195	-0.02	-0.33	-0.12	-0.15	0.3	0.04	0.16	0.37	-0.07	-0.32	-0.21	-0.565	-0.63	-0.11
AGTR2	NA	0.01	NA	NA	NA	NA	0.46	NA	-0.32	-0.23	0.49	0.74	NA	0.26	NA	NA	0.32	0.02	NA	NA	NA	NA	NA	NA	NA	NA	0.21	0.83	0	0	NA	NA	1.46	0.52	-0.08	0.29	0	0.49	-0.05	0.69	NA	NA	NA	0.32	NA	NA	NA	NA	NA
AGTRAP	0.2	-0.39	0.18	-0.09	-0.6	-0.21	-0.17	-0.01	-0.55	0.15	-0.59	-0.55	-0.03	-0.31	-0.15	0.02	-0.17	-0.29	0.24	0.46	0.33	-0.39	-0.51	-0.16	0.73	-0.12	-0.3	0.37	-0.02	-0.01	-0.08	0.06	-0.28	-0.01	0.06	0.01	0.33	-0.34	-0.25	0.07	0.2	-0.42	-0.28	-0.07	0.23	-1.19	0.11	1	-0.65
AGTRL1	0.67	-0.05	0.02	-0.27	-0.61	-0.1	-0.34	-0.06	0.1	0.06	-0.24	-0.21	0.05	-0.11	-0.32	0.3	0.07	0.04	0.17	-0.31	0.38	-0.57	-0.18	0.16	-0.27	0.31	-0.09	0.08	0.05	0.06	-0.5	-0.47	-0.37	-0.08	0.14	-0.04	0.01	-0.4	-0.31	-0.01	-0.22	-0.11	-0.34	-0.44	-0.04	-0.22	0.01	-0.05	-0.16
AGXT	-0.0866667	-0.236667	-0.0533333	-0.676667	-0.0633333	-0.383333	-0.463333	-0.6	-0.6	-0.5	-0.486667	-0.266667	-0.18	-0.22	-0.426667	0.14	-0.363333	-0.363333	-0.23	-0.386667	0.123333	-0.12	-0.12	-0.35	0.385	-0.0166667	-0.416667	-0.336667	-0.386667	-0.32	0.14	0.296667	-0.0666667	-0.263333	-0.4	-0.34	-0.466667	-0.19	-0.376667	-0.46	0.16	-0.366667	-0.153333	-0.29	0.326667	-0.37	-0.505	-0.606667	-0.406667
AGXT2	-0.37	-0.24	-0.26	-0.01	0.56	-0.09	-0.15	0.29	-0.29	-0.32	-0.21	-0.05	0.08	-0.29	0.36	0.25	-0.26	-0.21	0.17	-0.12	0.27	0.34	0.04	-0.52	0.21	0.15	-0.04	0.1	-0.1	-0.05	-0.26	0.08	-0.65	0.02	-0.18	0	-0.25	0.14	-0.28	0.08	0.12	-0.29	-0.3	0.08	0.42	0	0.28	-0.22	-0.38
AGXT2L1	0.7	-0.04	-0.04	0.32	-0.46	0.13	-0.33	0.08	0.51	-0.16	-0.13	0.25	0.03	0.11	-0.37	0	0.33	0.44	0.04	-0.33	0.41	0.18	0.3	0.22	0.14	0.11	-0.04	-0.31	0.12	0.13	0.01	0.16	-0.74	-0.01	0.41	0.14	-0.09	-0.25	0.3	-0.05	-0.78	0.45	0.02	-0.01	-0.42	-0.15	0.98	0.12	NA
AGXT2L2	-0.52	0.14	0.275	-0.065	-0.075	0.115	-0.09	0.01	0.14	0.07	0.045	0.115	0.325	0.075	0.03	-0.165	0.145	0.065	0.01	-0.02	0.285	0.055	0.205	0.035	0.13	0.275	-0.13	-0.165	-0.15	-0.035	0.295	0.31	0.26	0.045	0.08	-0.035	-0.305	-0.04	-0.01	-0.265	0.19	0.015	-0.025	-0.14	0.04	-0.14	0.42	0.225	-0.065
AHCTF1	0.1	-0.03	0.06	-0.0866667	-0.0766667	0.0433333	-0.12	0.0433333	0.0366667	-0.0766667	-0.113333	-0.133333	0.143333	-0.05	-0.33	-0.03	-0.0433333	0.04	0.0833333	-0.153333	0.0766667	-0.153333	-0.04	0.0766667	0.166667	-0.08	-0.113333	-2.89e-18	-0.09	0.04	-0.196667	-0.0566667	-0.0633333	0	0.0866667	-0.0466667	0.0566667	-0.196667	0.0566667	0.146667	-0.233333	-0.07	-0.0133333	-0.133333	0.15	-0.373333	-0.0466667	0.0366667	-0.0766667
AHCY	0.11	0.06	0.08	-0.19	0.07	-0.29	0.28	0.47	0.23	0.05	0.04	0.3	-0.29	0.04	-0.06	-0.17	0.13	0.15	-0.21	0.34	-0.36	0.17	-0.02	-0.1	-0.16	NA	0.19	0.43	0.17	0.11	0.4	-0.97	-0.61	0.13	-0.25	0.13	-0.14	0.2	0.01	-0.14	0.35	-0.03	0.05	0.19	-0.17	-0.02	0.2	NA	0.32
AHCYL1	-0.43	0.34	0.325	0.095	-0.485	-0.12	-0.03	0.5	-0.27	0.15	-0.24	0.09	0.22	-0.02	0.255	-0.08	-0.01	0.365	0.12	0.12	0.07	-0.14	-0.075	0.46	0.45	0.245	0.485	0.56	0.31	-0.035	0.115	-0.14	0.02	0.39	0.27	0.11	0.31	0.31	-0.1	0	0.075	-0.06	-0.03	0.32	0.565	0.275	0.36	0.35	0.585
AHDC1	0.1	0.05	0.145	-0.14	-0.01	-0.29	0.105	0.005	0.165	0.11	0	-0.075	-0.07	-0.04	-0.2	0.41	-0.05	0.04	-0.075	-0.025	-0.045	-0.26	-0.02	-0.355	-0.075	-0.125	0.06	0.075	0.155	0.045	-0.055	-0.215	-0.27	-0.05	0.12	-0.06	-0.125	-0.06	0.12	0.155	0.04	0.1	0.13	-0.125	-0.16	0.105	0.005	-0.98	-0.16
AHI1	0.133333	-0.223333	-0.11	-0.246667	-0.226667	0.025	-0.04	-0.55	-0.33	0.0433333	-0.00666667	0.0233333	-0.0833333	-0.59	-0.816667	0.59	-0.656667	0.106667	-0.0866667	-0.85	-0.03	-0.22	-0.156667	-0.96	0.06	-0.0866667	-0.293333	-0.263333	-0.1	-0.26	0.13	-0.67	-0.57	0.196667	-0.406667	0.126667	0.005	-0.863333	-0.446667	-0.333333	-0.435	-0.0366667	0.02	0.163333	-0.575	-0.54	-0.33	-0.376667	-0.55
AHNAK	0.105	-0.02	-0.1475	-0.065	0.125	0.02	0.0175	-0.045	0.1925	0.035	-0.035	0.065	-0.165	0.1275	0.0425	0.2775	0.16	-0.0075	-0.0975	0.025	-0.255	-0.0225	0.1	0.04	-0.1825	0.1525	0.0575	-0.1575	-0.075	0.02	-0.0725	-0.1225	-0.1625	-0.0975	0.1525	-0.0575	-0.045	-0.185	0.09	-0.14	-0.0575	-0.065	-0.215	-0.115	-0.54	-0.12	-0.04	-0.14	0.0525
AHNAK2	-0.28	-0.41	0.2	-0.25	-0.14	-0.16	-0.24	-0.02	-0.2	-0.6	-0.43	0.04	0.06	-0.06	0.03	0.01	-0.16	-0.49	-0.1	-0.37	0.08	0	0.05	-0.29	0.38	0.09	-0.12	-0.08	-0.19	-0.29	0	0.26	-0.01	-0.14	-0.44	-0.01	-0.35	0.18	-0.15	0.33	0.45	-0.13	-0.46	-0.05	0.35	-0.47	-0.08	-0.4	-0.3
AHR	0.28	-0.24	NA	-0.04	-0.21	0.24	0.06	-0.33	-0.18	-0.13	0.1	-0.29	-0.26	-0.04	-0.36	-0.5	-0.21	-0.2	0.06	-0.89	0.2	NA	-0.74	0.06	0.14	-0.18	0.2	0.27	0.07	0.14	-0.42	0.35	0	0.13	0.1	0.32	0.06	-0.08	-0.03	0.33	0.19	-0.12	-0.32	0.15	0.82	0.75	0.38	NA	-0.58
AHRR	-0.19	0.05	0.18	-0.02	0.06	0.47	0.12	0.28	0.29	-0.14	0.25	0.34	0.75	0.07	-0.04	-0.16	0.16	0.23	0.59	0.9	0.55	0.56	0.62	0.84	0.21	0.84	0.12	-0.23	0.17	0.3	0.23	0.61	0.36	-0.05	0.24	0.18	0.21	0.49	-0.03	-0.17	0.37	0.32	0.31	0.18	-0.29	0.11	-0.63	NA	1.35
AHSA1	0.47	0.07	0.55	-0.18	-0.15	-0.05	0.31	0.19	-0.53	0.29	0.09	-0.27	-0.53	-0.38	-0.23	-0.62	-0.54	-0.24	-0.19	0.42	0.07	-0.03	-0.06	0.23	-0.03	0.1	-0.12	0.37	0.07	-0.18	-0.17	0.17	0.11	-0.01	-0.3	0.18	-0.14	0.05	-0.01	-0.36	-0.05	0.02	-0.32	-0.01	0.18	-0.18	0.27	-0.58	-0.07
AHSA2	0.26	0.07	0.03	0.22	0.29	0.1	-0.03	-0.03	0.05	-0.06	-0.06	0.01	0.31	0.11	0.18	-0.61	-0.43	0.43	0.39	0.21	0.78	-0.4	0.21	0.18	0.7	0.3	-0.03	0.19	0.14	-0.01	-0.04	0.47	0.42	0.32	0.13	-0.01	0.09	0.32	-0.25	0.01	-0.47	-0.19	0.02	0.11	0.15	0.12	0.1	0.59	0.19
AHSG	-0.13	NA	-0.07	0.32	-0.47	0.21	0.13	0.12	NA	NA	0.59	0.11	0.43	0.17	0.12	0.33	0	-0.37	-0.04	-0.21	0.03	0.19	0.1	0.16	0.07	0.21	NA	NA	-1.49	NA	0.2	0.33	0.17	-0.45	-0.18	NA	-0.04	0.46	-0.01	-0.27	0.64	-0.4	0.07	NA	-0.11	0.47	NA	0.09	0.07
AICDA	-0.42	-0.18	-0.25	0.04	-0.14	-0.24	-0.16	-0.07	-0.54	-0.19	-0.35	-0.37	-0.41	-0.17	-0.31	0.14	-0.36	-0.43	-0.22	-0.09	0.01	-0.28	-0.38	-0.26	-0.37	-0.36	-0.18	0.04	-0.38	-0.27	0.12	-0.38	-0.02	-0.18	-0.2	-0.22	-0.22	-0.2	-0.05	0.03	-0.28	-0.25	-0.2	0.01	0.29	-0.3	-0.09	-0.12	-0.02
AIF1	-0.07	0.15	0.84	-0.1	-0.08	0.03	0.39	0.44	-0.95	0.3	0.43	0.35	-0.38	-0.91	-0.59	-0.38	-0.57	-0.36	0.25	-0.14	0.4	-0.01	-1.15	-0.65	-0.86	-1.3	0.53	1.14	-0.3	0.38	-0.18	0.03	-0.08	0.42	-0.9	-0.02	0.25	0.01	-0.76	-0.16	0.37	0.61	-0.04	0.5	0.47	0.67	0.67	0.49	0.47
AIFM1	0.74	0.2	0.43	0.39	-0.09	0.17	0.41	0.11	-0.26	0.44	0.17	0.09	-0.29	-0.09	0.07	-0.15	-0.72	0.34	-0.03	0.22	0.18	-0.2	0.17	0.22	-0.2	0.09	0.16	0.55	0.06	0.38	-0.03	-0.08	-0.08	0.02	-0.53	0.21	0.33	0.17	-0.26	0.03	0.19	0.59	-0.22	0.28	0.71	0.86	NA	NA	NA
AIFM2	0.23	0.05	0.05	0.22	-0.3	-0.19	-0.11	-0.54	0	0.2	-0.06	0.1	0.16	0.05	0.14	0.1	-0.01	0.09	0.19	0.23	0.17	0.32	-0.02	-0.09	0.08	0.23	-0.06	-0.13	0.21	0.27	0.27	-0.21	-0.49	0.16	-0.02	0.41	-0.02	0	0.1	0.01	-0.16	0.05	-0.77	0.03	-0.31	0.09	0.02	0.4	0.45
AIG1	-0.275	-0.18	-0.14	0.605	0.035	0.295	-0.16	-0.225	-0.195	-0.11	-0.105	0.1	-0.415	-0.125	0.315	0.285	-0.28	-0.165	-0.01	-0.01	0.055	-1.125	-0.095	0.025	0.22	-0.07	-0.04	-0.03	0	0.065	0.06	-0.215	0.12	-0.135	-0.13	-0.2	-0.07	0.2	-0.12	-0.25	0.41	0.115	0.44	0.015	-0.01	0.37	0.62	0.185	-0.105
AIM1	-0.32	0.07	0.19	-0.01	0.13	-0.12	-0.28	0.33	-0.17	-0.15	-0.05	0.01	0.47	-0.01	0.22	-0.85	-0.19	-0.15	-0.02	0.32	0.24	-0.02	0.1	-0.18	0.02	0	-0.13	0.14	0.04	0.1	0.61	0.35	0.31	0.11	-0.05	-0.08	0.3	0.21	-0.18	-0.15	0.01	-0.02	-0.22	0.07	0.51	0.37	-0.52	0.21	0.41
AIM1L	-0.11	-0.42	-0.15	-0.13	-0.62	-0.02	-0.93	-0.37	-0.93	-0.71	-0.59	-0.49	0	-0.77	-0.03	0.35	-0.36	-0.53	-0.48	0.6	-0.46	0.56	0.01	0.62	-0.42	-0.26	-0.74	-0.64	-0.4	-0.56	0.32	0.5	0.09	-0.39	-1.12	-0.51	-0.58	-0.02	-0.97	-1.22	-0.1	-0.6	0.07	-0.49	-0.08	-0.12	-0.19	-0.01	0.37
AIM2	0.38	-0.08	0.21	0.18	-0.25	0.01	0.06	0.17	0.18	-0.03	0.09	0.21	0.14	-0.05	0.08	0.32	-0.05	0.19	0.19	-0.59	-0.01	0	0.39	0.21	0.13	0.17	-0.03	0.11	0.02	0.16	0.04	-0.2	-0.26	0.23	0.02	0.15	0.13	-0.35	-0.1	-0.01	-0.54	0.03	0.11	0	-0.37	-0.01	0.09	-0.32	-0.04
AIP	-0.07	0.04	0.13	0.08	-0.44	0.12	-0.01	-0.45	-0.29	0.22	-0.06	-0.25	-0.1	0.03	-0.11	-0.43	-0.26	-0.07	-0.19	-0.16	0.05	-0.4	-0.6	-0.36	-0.01	-0.24	0.05	0.39	0.25	0.06	0.42	-0.06	-0.04	-0.08	-0.08	0	-0.08	0.26	0.32	0.04	-0.07	0.18	0	-0.22	0.49	-0.43	-0.61	0.16	0.24
AIPL1	0.33	0.09	0.67	0.07	0.17	0.19	0.07	0.22	-0.11	-0.08	0.08	0.06	0.25	-0.02	0.21	0.47	0.09	0.17	-0.12	0.34	-0.01	0.18	0.06	0.22	0.13	0.16	0.11	0.1	0.03	0.14	0.15	0.55	0.06	0.25	-0.13	0.12	0.02	0.37	-0.06	-0.38	-0.01	0.11	0.16	-0.11	0.25	-0.01	0.22	0.32	0.35
AIRE	0.0466667	0.09	0.293333	0.286667	-0.0366667	0.14	0.166667	0.233333	0.0633333	0.173333	0.103333	0.12	-0.0233333	0.123333	0.18	-0.0933333	0.213333	0.08	-0.146667	0.293333	-0.286667	0.293333	-0.163333	0.253333	-0.32	-0.206667	0.116667	0.17	0.0466667	0.09	0.27	0.286667	0.286667	0.153333	0.113333	0.08	-0.03	0.246667	0.153333	0.233333	-0.113333	0.0566667	0.41	-0.01	0.113333	0.203333	0.0833333	-0.18	-0.0333333
AJAP1	-0.14	-0.08	-0.65	0.13	0.2	0.01	0	0.08	0.07	-0.01	-0.13	-0.02	-0.21	0.12	-0.09	0.33	0.2	0.06	0.01	-0.3	-0.15	0.21	-0.04	0.11	-0.01	-0.1	0.01	0.21	-0.01	-0.1	-0.17	-0.1	0.02	0.01	0.06	0.03	-0.02	-0.16	0.23	-0.03	-0.3	-0.14	-0.45	-0.17	-0.1	-0.23	-0.34	-0.07	0.01
AK1	0.22	-0.02	0.02	0.59	0.7	0.16	-0.01	0.03	-0.08	-0.05	0.06	0.07	0.07	-0.17	0.23	-0.68	0.01	-0.06	-0.09	0.31	-0.06	0.66	0.46	0.4	-0.32	0.33	0.42	0.04	0.06	0.14	0.79	0.32	0.77	-0.13	0.02	0.13	-0.38	0.81	0.04	-0.35	0.29	0.2	0.44	0.36	0.08	0.07	-0.06	NA	0.37
AK2	0.27	0.11	0.05	0.18	-0.42	0.18	-0.08	0.3	0.14	0.09	0.31	0.37	-0.02	0.21	0.12	-0.14	-0.02	0.16	-0.1	0.1	-0.26	0.19	-0.09	-0.05	-0.31	-0.18	0.05	-0.06	0.29	0.05	0.32	0.18	0.22	0.12	-0.13	0.16	0.11	0.25	0.13	0.09	0.13	0.11	0.09	0.32	0.13	-0.08	0.3	0.74	0.54
AK3	-0.12	0.01	-0.53	0.18	-0.41	0.39	0.24	0.05	-0.36	0.12	-0.19	0.15	-0.11	0.14	0.23	-0.14	-0.07	0.05	-0.34	-0.53	0	0.13	-0.31	0.18	-0.02	0.03	0.06	-0.2	-0.19	0.1	-0.02	0.32	0.48	-0.13	0.06	-0.11	-0.4	0.35	0.03	0.29	0.17	0.01	0.01	-0.03	0.54	-0.37	-0.2	NA	-0.06
AK3L2	0.57	0.1	NA	-0.17	0.38	-0.03	0.35	0.88	0.16	0.1	0.11	0.18	-0.16	0.35	0.08	-0.35	-0.06	0.23	-0.16	0.45	-0.18	0.1	-0.36	0.04	-0.3	-0.29	0.51	0.58	-0.01	0.01	0.43	-0.56	0.21	0.36	-0.04	0.52	-0.1	0.26	0.23	0.33	0.42	0.2	0.4	-0.02	0.72	-0.06	0.12	NA	-0.34
AK5	-0.29	-0.05	-0.075	-0.12	-0.99	-0.19	0.09	0.085	0.14	0.055	0.16	0.175	0.08	0.165	0.06	0.44	-0.14	0.155	-0.26	0.015	-0.255	0.08	-0.06	-0.155	-0.3	-0.185	0.055	0.05	-0.075	-0.055	0.085	0.035	-0.16	-0.035	-0.075	0.13	0.03	-0.375	0.06	0.125	-0.325	0.145	0.16	0.145	-0.035	0.01	NA	NA	0.155
AK7	0.16	0.06	NA	-0.41	0.13	0.36	0.25	-0.11	0	0.15	-0.29	0.11	0.22	0	-0.02	0.06	-0.01	0.11	0.03	-0.23	-0.03	-0.48	0.33	-0.33	0.19	0.35	-0.05	0.04	0.09	0.15	-0.11	-0.14	0.27	0.05	0.14	0.38	0.35	-0.36	0.01	0	-0.08	0.08	0.31	-0.14	NA	-0.02	0.42	0.09	-0.23
AKAP1	-0.39	-0.46	-0.84	-0.47	-0.34	-0.5	-0.01	-0.53	-0.56	-0.07	-0.06	-0.28	-0.45	-0.36	0.26	0.3	-0.57	-0.48	-0.18	-0.43	NA	-0.59	-0.99	-0.12	NA	NA	0.29	0.61	-0.11	0	-0.05	-0.18	-0.35	0	-0.07	0.26	0.15	-0.73	-0.06	0.19	0.25	0.09	-0.25	0.35	0.66	-0.82	-0.33	NA	-0.8
AKAP10	-1.25	-0.45	0.01	0.41	-1.05	-1.04	-0.02	0.38	0.5	NA	0.61	0.29	-0.38	-0.19	0.46	0.38	NA	-0.46	0.55	-1.67	-0.49	0.08	-0.39	-0.17	-0.17	0.09	0.1	NA	NA	NA	-0.47	-0.28	-0.67	1.19	NA	NA	NA	-0.09	-0.26	0.21	-0.19	NA	-0.62	1.3	-0.11	0.47	-0.71	NA	-0.45
AKAP11	-0.12	0.07	0.02	-0.005	0.305	-0.045	0.235	0.245	0.03	0.07	0.13	0.01	0.045	-0.025	0.3	-0.43	-0.09	0.015	0.025	0.71	-0.175	0.345	0.225	-0.02	-0.2	0.065	0.155	0.155	-0.02	0.105	0.08	0.535	0.045	0.105	-0.06	0.11	0.08	0.055	-0.025	0.005	0.3	-0.005	0.37	0.13	0.365	0.19	0.045	-0.365	0.005
AKAP12	-0.03	0.05	-0.17	0.01	0.7	0.29	-0.24	-0.08	-0.08	-0.22	0.05	0.23	0.57	-0.19	0	-0.08	-0.31	0.15	0.14	0.09	0.31	0.62	0.68	0.4	0.38	0.42	-0.07	-0.05	-0.11	-0.1	0.83	0.66	0.37	0.28	-0.18	-0.12	-0.09	0.18	-0.33	-0.36	0.3	0.09	0.24	0.55	0.62	-0.07	0.05	0.05	0.28
AKAP13	0.136667	-0.0666667	0.186667	0.436667	0.0266667	0.226667	0.283333	-0.0933333	-0.08	0.0666667	0.15	0.06	0.313333	-0.0966667	-0.116667	0.0733333	-0.04	0.0933333	0.16	0.286667	0.57	-0.273333	-0.01	0.0133333	0.575	0.435	-0.01	0.32	0.15	0.12	0.13	0.325	0.183333	0.24	0.19	0.133333	0.196667	0.06	-0.0333333	-0.0833333	0.28	0.19	1.11	0.08	0.0966667	-0.54	0.27	-0.14	-0.065
AKAP2	0.4	-0.19	-0.24	0.48	0.04	0.07	0.11	0.15	0.01	0.04	0.02	0.04	-0.27	0.13	0.32	-0.18	-0.05	-0.01	-0.17	0.06	-0.34	0.27	-0.13	0.07	-0.26	-0.29	0.02	0.05	0.02	-0.18	0.34	0.15	0.55	-0.02	-0.03	0.03	-0.2	0.2	0.02	0.16	-0.04	-0.1	0	0.13	-0.23	-0.19	-0.04	-0.04	0.23
AKAP3	-0.28	0.01	-0.02	0.12	0.16	-0.27	-0.06	-0.02	0.19	0.26	-0.13	-0.02	-0.4	0.4	-0.12	0.11	0.47	0.07	-0.15	-0.17	-0.21	0.26	-0.05	-0.17	-0.17	-0.4	-0.47	0.07	-0.1	-0.08	-0.13	0.48	0.36	-0.34	0.05	-0.04	0.05	0.17	0.27	0.2	0.3	-0.23	0.55	0.12	0.21	0.01	0.45	NA	-0.23
AKAP5	NA	0.19	0.25	0.01	0.16	0.05	0.35	0.3	0.22	0.04	0.19	0.21	0.04	-0.05	-0.24	0.46	0.09	0.26	0.13	-0.31	-0.24	0.22	-0.05	-0.14	-0.07	-0.03	-0.03	0.2	NA	0.33	0	0.02	0.16	0.4	0.09	0	0	0.12	0.03	0.09	0.08	0.27	0.2	0.01	-0.44	-0.76	-0.13	NA	0.03
AKAP6	0.36	-0.01	0.06	0.14	0.3	0.08	0.24	0.32	-0.01	0.11	0.04	-0.14	-0.18	0.22	0.24	-0.88	0.23	-0.08	-0.22	0.32	0.01	0.01	-0.2	0.12	-0.14	-0.28	0.05	0.44	-0.05	0.06	0.02	-0.08	0.1	0.02	0.08	0.28	-0.12	0.57	0.01	0.1	0.01	0.03	0.13	0.27	-0.09	0.08	0.13	0.16	-0.03
AKAP7	0.22	-0.035	-0.12	0.175	-0.265	0.145	-0.08	-0.07	0.01	-0.175	0.025	0.15	-0.085	0.165	-0.125	-0.395	0.11	-0.005	0.015	0.05	0.125	-0.115	0.05	-0.155	0	-0.29	-0.055	0.055	-0.02	-0.13	-0.02	-0.69	0.38	0.03	0.025	0.065	0.03	0.27	0.035	0.1	-0.325	-0.03	0.05	-0.035	0.42	-0.075	0.21	0.47	0.34
AKAP8	0.06	-0.01	-0.1	0.07	-0.63	0.19	0.09	0.03	0.1	0.02	0.15	0.28	-0.07	0.01	0.33	0.29	0.19	0.19	-0.12	-0.16	-0.47	0.36	-0.11	0.32	-0.34	-0.26	0.05	-0.14	-0.11	0.06	-0.16	-0.6	-0.51	-0.04	-0.27	0.14	-0.13	-0.08	0.06	-0.24	-0.14	0.07	-0.03	-0.3	-0.23	0.01	-0.34	-0.32	-0.11
AKAP8L	-0.005	-0.355	-0.32	0.135	-0.215	0.235	-0.35	0.03	0.29	-0.335	-0.195	-0.185	-0.36	0.025	0.045	0.57	0.23	-0.12	-0.535	-0.17	-0.73	0.015	-0.38	0.13	-0.475	-0.61	-0.21	-0.615	-0.315	-0.225	-0.235	-0.33	-0.61	-0.38	0.045	-0.195	-0.44	-0.385	0.075	0.035	-0.385	-0.3	-0.065	-0.295	-0.54	-0.735	-0.605	-0.215	-0.23
AKAP9	0.385	-0.303333	-0.135	0.303333	0.02	0.0233333	-0.0866667	-0.085	-0.103333	-0.0733333	0.00666667	-0.223333	-0.305	-0.226667	0.26	0.42	-0.306667	-0.1	-0.223333	-0.863333	-0.345	-0.413333	-0.263333	-0.135	-0.35	-0.22	-0.353333	-0.563333	-0.183333	-0.166667	-0.17	-0.273333	-0.46	-0.38	-0.17	-0.08	-0.376667	-0.39	-0.333333	-0.0133333	-0.43	-0.07	-0.166667	-0.0733333	-0.123333	0.46	-0.17	-0.45	-0.15
AKNA	0.53	-0.31	-0.32	-0.11	-0.08	-0.06	-0.14	-0.1	0.26	-0.23	0.01	-0.07	-0.12	-0.04	0.02	0.59	0.14	-0.16	-0.44	-0.28	-0.54	0.2	-0.19	-0.33	-0.53	-0.43	-0.27	-0.5	-0.17	-0.22	-0.24	-0.71	-0.7	-0.33	-0.17	-0.33	-0.37	-0.28	-0.11	-0.2	-0.4	-0.3	0.12	-0.33	-0.57	-0.49	-0.37	-0.1	-0.34
AKR1A1	-0.17	-0.08	-0.17	-0.22	-0.15	-0.17	0.19	-0.13	-0.4	0.07	0.1	-0.09	-0.04	-0.14	-0.07	0.12	-0.22	-0.04	-0.24	-0.1	0.13	0.2	-0.23	-0.26	-0.09	-0.14	0.05	0.03	-0.11	-0.04	0.22	-0.1	-0.01	0.11	-0.28	-0.03	-0.28	0.13	-0.07	-0.23	-0.11	0.09	-0.15	0.04	0.53	-0.06	-0.09	-0.36	-0.23
AKR1B1	-0.03	0.19	0.21	0.38	0.22	0.25	0.53	0.09	-0.16	0.6	0.18	0.14	-0.49	0.06	0.27	-0.49	-0.1	0.14	-0.18	0.32	-0.1	0.05	-0.14	0.19	-0.16	0	0.61	0.53	0.15	0.23	0.1	0.39	0.21	0.23	-0.05	0.32	0.04	0.14	0.23	0.06	0.16	0.12	0.32	0.21	0.33	-0.01	0.27	NA	0.09
AKR1B10	0.55	-0.36	0.61	0.33	0.42	0.03	0.36	0.49	-0.3	0.15	-0.04	-0.32	-1.27	-0.06	-0.1	0.5	-0.05	-0.14	-0.07	-0.44	-0.22	-0.22	-0.52	-0.25	-0.08	-0.27	0.06	0.53	-0.29	-0.22	-0.24	0.43	-0.18	-0.18	-0.07	0.2	-0.46	0.1	0.22	0.36	-0.18	-0.18	-0.2	0.04	0.47	0.79	1.77	-0.47	NA
AKR1C2	0.05	-0.165	-0.165	0.1	-0.01	-0.11	-0.325	0.085	-0.19	-0.075	-0.14	-0.16	-0.15	-0.1	-0.05	0.22	-0.16	-0.22	-0.125	-0.185	-0.18	-0.6	-0.01	-0.3	-0.325	-0.18	-0.295	-0.325	-0.02	-0.205	-0.3	-0.255	-0.095	-0.3	-0.235	-0.3	-0.08	-0.15	-0.17	-0.355	-0.12	-0.23	-0.09	-0.105	-0.3	-0.39	0.115	-0.13	-0.385
AKR1C3	0.84	0.26	0.14	-0.04	-0.7	-0.26	0.34	0.39	-0.4	0.7	-0.39	-0.32	-0.03	-0.31	0.03	-0.17	-0.72	0.06	0.47	0.33	0.36	-0.26	0.33	0.37	0.48	0.16	0.46	0.54	0.59	0.61	-0.26	0.85	-0.75	0.51	-0.22	0.42	0.24	0.13	-0.07	-0.05	-0.4	0.4	-0.58	0.69	0.69	-0.14	NA	0.05	NA
AKR1C4	0.14	0.06	-0.39	-0.19	0	0.22	-0.48	0.37	-0.18	0.01	-0.1	-0.01	-0.75	-0.32	-0.28	0.37	0.19	-0.05	-0.38	-0.39	-0.47	-0.2	-1.12	-0.32	-1.22	-0.99	0.01	-0.59	-0.36	0.05	-0.2	0.11	-0.27	-1.09	-0.12	0.09	-0.02	0.01	0	0.02	-0.47	0.1	NA	-0.17	1.19	-0.22	NA	0.83	-0.8
AKR1CL2	0.21	0.17	NA	-0.19	0.55	0.07	0.31	-0.09	0.05	-0.1	0.1	0.11	0.72	0.06	0.01	-0.85	-0.04	0.11	0.1	0.04	0.11	0.16	0.29	-0.42	0	0.23	0.16	-0.27	0.08	0.25	0.39	0.28	0.41	0.36	0.05	NA	-0.05	0	0.33	0.13	0.56	0.2	0.49	0.08	0.35	0.01	0.16	1.06	0.1
AKR1D1	NA	-0.22	0.7	0.41	-0.17	0.62	-0.91	NA	-0.04	-0.41	NA	NA	NA	NA	0.62	-0.55	-0.15	0.02	-0.65	-0.11	-0.09	-1.29	NA	0.72	NA	NA	NA	-0.56	-0.39	-0.5	NA	0.97	0.57	-0.86	-0.36	-0.5	-0.15	0.12	0.49	NA	-0.06	-0.39	0.72	-0.7	NA	-0.71	1.1	NA	NA
AKR7A3	0.145	0.095	0.315	-0.05	-0.22	-0.275	0.27	-0.145	0.015	0.195	0.145	-0.005	-0.29	-0.02	-0.105	0.095	0.245	0.125	-0.305	-0.24	0.195	-0.36	-0.305	-0.255	0.055	-0.225	0.13	0.345	0.105	0.185	0.045	-0.17	-0.56	0.085	-0.005	0.195	-0.05	-0.125	0.25	0.135	-0.125	0.11	-0.225	-0.225	0.265	-0.615	-0.305	-0.535	-1.155
AKT1	-1.78	-0.05	0.03	0.39	0.01	0.04	0.31	0.07	-0.12	0.12	-0.15	-0.18	-1.13	0.09	-0.7	-0.21	0.12	0.1	0	-0.19	-0.09	0.06	-0.4	-0.16	-0.53	-0.25	0.13	0.54	-0.04	0.25	0.14	-0.03	-0.35	0.06	0.24	0.41	0.05	0.25	0.04	0.28	0.31	-0.34	-1.41	-0.03	-0.45	0.23	0.25	0.96	-0.09
AKT1S1	0.55	0.03	-0.12	-0.09	-0.18	-0.22	0.1	-0.17	0.09	-0.13	-0.1	-0.12	0.17	-0.2	-0.1	0.48	-0.08	0.05	-0.05	-0.25	-0.13	-0.24	0.18	-0.28	-0.19	-0.21	-0.22	-0.16	0.07	0.12	0.07	-0.48	-0.27	0.06	0.19	0.05	-0.02	-0.25	-0.17	-0.16	-0.19	-0.07	-0.26	-0.15	-0.27	-0.15	-0.29	-0.26	-0.4
AKT2	NA	0.11	NA	0.3	NA	0.97	-0.09	0.43	0.37	0.23	0.19	0.17	-0.31	0.37	1.02	-0.59	-0.39	-0.24	-0.34	1.01	-1.31	NA	-0.09	NA	-0.73	-0.11	-0.18	NA	0.2	-0.24	0.85	0.19	-0.35	0.11	-0.06	NA	-0.11	0.4	0.07	0.44	NA	0.24	NA	-0.13	0.46	NA	1.06	NA	NA
AKT3	-0.08	0.08	-0.17	-0.18	0.4	0.03	0.26	0.17	0.15	0.01	0.08	0.17	0.14	0.02	-0.07	-0.17	0.18	0.18	-0.08	0.38	-0.18	0.26	0.09	0.25	-0.16	-0.06	0.27	0.09	-0.06	-0.02	0.49	0.2	0.07	0.07	-0.1	-0.19	-0.26	0.11	-0.01	-0.33	0.2	0.09	0.01	0.09	-0.17	0.12	-0.08	-0.41	0.28
AKTIP	0.48	-0.01	0.2	0.3	0.08	-0.11	0.17	-0.11	-0.32	0.02	0.12	0.02	-0.48	-0.09	0.1	-0.63	-0.2	-0.05	-0.3	0.11	0.01	-1.48	-0.45	0.01	-0.03	-0.29	0.34	0.38	0.06	-0.03	-0.23	-0.07	0.22	-0.1	-0.26	0.22	-0.16	0.39	-0.09	-0.26	0.23	-0.18	-0.16	0.08	0.68	0.34	NA	NA	0.77
ALAD	0.42	-0.08	0.02	0.08	0.3	0.35	0	0.14	0.1	0.68	-0.01	-0.04	0.02	0.2	0.07	0.47	0.36	0.18	-0.03	-0.03	-0.21	0.2	0.1	0.2	-0.18	0.07	0.02	-0.21	-0.17	-0.07	-0.03	-0.31	-0.3	NA	0.03	-0.37	0	-0.04	-0.05	-0.1	-0.18	0.06	0.27	-0.29	0.16	0.48	0.44	-0.08	-0.16
ALAS1	0.07	0.05	-0.215	0.17	-0.015	0.005	0.16	-0.01	-0.16	0.045	0.135	-0.005	-0.165	0.03	0.165	-0.04	-0.21	0.04	0.12	-0.365	0.245	0.035	-0.02	-0.095	0.17	0.08	0.05	0.23	0.085	0.095	0.095	-0.19	0.125	0.14	0.075	-0.16	-0.205	0.25	-0.04	0.015	0.25	0.07	-0.035	-0.125	0.43	0.34	0.205	-0.14	0.005
ALAS2	-0.36	0.05	-1.15	1.02	0.07	1.22	-1.25	-0.37	1.14	0.2	0.16	0.67	0.17	0.73	-0.39	0.5	0.07	0.4	-0.12	-0.55	-0.73	0.43	-0.22	0.68	-0.67	-0.72	0.25	-1.71	0.19	-0.04	-0.45	0.18	0.44	-0.4	-0.49	-0.44	-0.03	-0.2	-0.57	-1.33	-1	-0.54	-0.77	-0.74	-1.53	0.29	0.51	1.25	0.63
ALB	-0.014	-0.156	-0.095	-0.138	0.078	-0.212	-0.006	-0.046	-0.382	-0.128	-0.086	-0.114	-0.028	-0.17	0.01	-0.32	-0.416	-0.048	-0.018	-0.056	0.242	-0.13	-0.186	-0.228	0.182	-0.074	0.066	0.164	-0.042	-0.08	0.004	0.242	0.048	0.048	-0.328	0.028	-0.06	0.078	-0.054	-0.116	0.006	-0.03	-0.268	-0.106	0.102	-0.198	0.036	0.005	0.07
ALCAM	-0.48	-0.02	NA	-0.08	0.02	0.16	0.29	0.44	0.26	-0.03	0.16	0.17	0.28	0.23	-0.18	-1.04	0.31	0.03	-0.19	0.65	-0.3	0.51	NA	0.5	0.14	0.28	0.32	0.19	-0.08	0.09	0.46	0.12	0.93	0.2	-0.09	0.14	0.09	0.31	0.05	0.2	-0.02	0.09	-0.02	0.19	-0.12	0.28	0.48	0.84	0.73
ALDH16A1	0.33	-0.34	-0.15	-0.06	-0.8	-0.24	-0.49	-0.35	-0.17	-0.39	-0.27	-0.29	0.27	-0.45	-0.29	0.38	-0.42	-0.3	-0.37	-0.17	-0.19	-0.2	0.07	0.28	-0.3	-0.19	-0.48	-0.58	-0.3	-0.42	-0.12	-0.32	-0.24	-0.42	-0.29	-0.35	-0.26	-0.4	-0.56	-0.86	-0.46	-0.53	-0.38	-0.22	-0.36	-0.8	-0.27	0.36	-0.23
ALDH18A1	0.09	0.07	0.03	-0.05	0.72	0.43	0.23	0.31	-0.14	-0.01	0.04	0.23	0.12	0.09	0.13	-0.63	0.23	0.15	0.03	0.71	0.36	0.59	0.41	-0.17	0.49	0.46	0.23	0.05	-0.02	-0.12	0.37	-0.45	0.42	0.13	-0.12	0.17	0.03	0.34	-0.19	0.12	0.11	0.09	-0.2	0.26	0.5	0.46	0.36	0.17	0.46
ALDH1A1	0.27	0.16	-0.05	0.44	0.17	-0.22	-0.53	0.19	-0.59	-0.2	0.02	-0.39	-0.36	-0.34	-0.05	0.41	-0.29	-0.18	0.21	-0.37	0.04	-0.09	-0.08	0.11	0.06	-0.14	0.03	0.3	-0.32	-0.07	-0.57	0.32	-0.57	-0.2	-0.2	0.37	-0.12	-0.34	-0.41	-0.39	-0.23	0.19	-0.44	0.1	0.19	-0.16	NA	0.42	0.81
ALDH1A2	0.06	0.06	0.12	0.33	0.4	0.14	0.02	0.05	0.16	-0.12	0.31	0.18	0.4	-0.05	0.08	-0.03	0.11	0.19	0.08	-0.15	0.14	0.62	-0.26	0.1	0.04	0.2	0.02	-0.11	0.16	0.21	0.35	-0.23	-0.11	0.17	0.15	-0.03	0	0.65	-0.04	-0.29	0.03	0.12	0.15	-0.03	0.18	-0.06	-0.57	NA	0.46
ALDH1A3	0.215	-0.11	0.06	0.09	0.03	-0.13	0.01	-0.12	0.18	0.155	-0.18	-0.13	-0.295	0.05	-0.3	0.11	0.17	-0.09	-0.225	0.095	-0.39	0.005	-0.105	-0.355	-0.485	-0.395	0.01	0.09	-0.01	-0.03	-0.51	-0.44	-0.435	-0.055	0.195	-0.075	0.15	-0.25	0.195	0.06	-0.065	-0.21	0.125	-0.1	-0.615	-0.53	-0.56	0.175	0.02
ALDH1B1	-0.09	-0.04	0.07	0.22	0.05	0.07	0.24	-0.06	0.21	0.13	0.13	-0.01	0.01	0.04	0.04	-0.67	0.09	0	0.04	0.72	0.38	0.4	0.46	0.53	0.25	0.4	0.05	-0.03	-0.29	0.02	0.28	0.47	0.59	0.15	0.26	-0.25	0.27	0.31	-0.13	0	0.48	-0.09	0.2	0.13	0.35	0.24	0.14	0.43	0
ALDH1L1	-0.265	0.03	0.225	0.175	-0.275	0.115	0.235	0.37	0.31	0.135	0.015	-0.015	-0.105	0.255	-0.195	-0.285	0.15	0.445	0.01	-0.145	-0.12	-0.445	-0.015	0.31	0.18	-0.095	0.065	0.175	0.045	-0.005	0.3	0.37	-0.035	0.205	0.215	0.165	-0.095	0.13	0.26	0.24	-0.145	0.065	0.27	0.025	0.96	0.23	0.465	0.79	0.27
ALDH2	0.51	-0.25	0.23	-0.24	-0.14	-0.16	0.31	-0.42	-1.16	0.12	-0.39	-0.06	-0.34	0.01	-0.48	0.58	-0.47	-0.02	-0.01	0.12	-0.5	-0.44	-0.28	-0.09	-0.56	0.02	-0.12	0.03	-0.45	-0.11	-0.17	-0.24	-0.52	-0.29	-0.5	-0.65	0.37	-0.48	-0.39	-0.26	0.44	-0.03	-0.23	-0.35	-0.29	-0.41	-0.54	-0.26	-0.17
ALDH3A1	-0.42	-0.02	0.14	-0.06	0.16	0.1	0.09	-0.2	0.01	-0.03	0	0	-0.07	-0.02	0.08	0.04	0.08	-0.06	0	0.11	0	-0.18	-0.19	-0.09	-0.28	0.11	-0.01	0.07	0.04	0.08	0.38	-0.59	-0.07	0.07	-0.1	0.1	-0.02	-0.04	0.05	0	-0.24	0.07	-0.08	0.02	0.19	0.7	-0.53	-0.56	0.24
ALDH3A2	0	0.15	-0.035	-0.105	0.435	0.06	0.19	0.115	-0.19	-0.12	0.065	-0.06	-0.145	0.005	0.225	-0.095	-0.01	0.015	-0.14	-0.31	0.11	0.19	-0.06	0.055	0.015	0.075	-0.055	-0.095	0.04	-0.02	-0.13	-0.08	-0.1	0.03	-0.1	-0.12	-0.145	0.175	0.075	-0.06	-0.275	0.045	0.44	0.17	-0.98	0.355	-0.01	NA	0.32
ALDH3B1	0.19	-0.28	0.235	-0.21	-0.53	-0.235	0.13	-0.315	-0.65	-0.075	-0.105	-0.3	0.16	-0.07	0.29	-0.285	-0.615	-0.33	-0.02	0.14	0.245	-0.01	-0.22	0.105	0.295	-0.045	-0.295	0.24	-0.11	-0.23	0.145	0.49	0.345	0.13	-0.285	0.225	0.08	0.33	-0.215	0.05	0.09	-0.235	0.035	0.01	0.265	-0.215	-0.1	-0.36	0.065
ALDH4A1	0.41	0	-0.69	0.23	-0.12	-0.04	-0.05	-0.63	0.19	-0.01	-0.02	0.18	-0.14	0	-0.5	0.05	0.09	0.08	-0.26	0.17	-0.13	-0.1	-0.16	0.73	-0.06	0.01	-0.13	-0.33	0	-0.02	-0.33	0.13	-0.27	-0.21	0.07	-0.27	NA	-0.24	-0.02	0.29	-0.23	-0.19	0.58	-0.21	-0.66	-1.04	-1.15	-0.23	0.17
ALDH5A1	NA	0.01	NA	NA	-0.03	NA	0.15	NA	-0.04	0.33	0.22	-0.05	0.04	0.08	-1.14	-0.62	0	-0.22	-0.28	0.16	-0.07	-0.29	0.03	0.57	0.17	-0.12	0.35	0.19	0.12	0.01	-0.83	0.05	-0.82	-0.06	0.07	0.25	-0.06	0.32	0.28	-0.02	0.55	0.01	NA	0.01	NA	NA	NA	NA	-0.15
ALDH6A1	-0.02	-0.08	-0.47	0.19	0.39	-0.17	0.38	-0.18	0.41	0.13	0.06	0.04	-0.63	0.15	-0.52	-0.18	0.12	0.09	0.01	0.66	-0.2	0.33	0	0.68	-0.2	0.07	0.29	0.23	-0.06	-0.08	-0.69	0.74	-0.19	0.22	-0.06	0.15	-0.17	-0.09	0.18	0.31	-0.4	0.13	NA	0.09	NA	0.09	NA	NA	NA
ALDH7A1	0.15	0.01	0.23	0.02	0.455	-0.18	0.085	-0.08	-0.03	0.415	0.19	0	-0.29	-0.055	-0.37	-0.245	0.1	-0.065	-0.11	-0.385	-0.92	0.065	-0.5	0.595	0.17	-0.36	0.07	0.185	-0.07	-0.04	0.065	-0.35	-0.41	0.305	0.065	-0.13	-0.03	0.165	0.515	0.285	0.14	0.01	0.34	0.04	0.17	0.56	-0.13	-0.12	0.39
ALDH8A1	NA	0.04	NA	0.56	-0.35	-0.11	0.27	NA	0.26	0.28	0.24	0.04	NA	0.26	0.32	0.15	0.16	0.1	-0.07	0.02	-0.29	-0.03	-0.35	0.63	0.11	-1.22	0.26	0.5	0.14	-0.01	0.54	NA	-0.37	0.15	0.13	0.51	-0.1	0.55	0.28	0.79	NA	0.17	0.64	0.34	NA	0.41	NA	NA	NA
ALDH9A1	0.41	0.08	-0.25	0.15	-0.01	0.11	0.14	0.44	-0.3	0.1	0.24	0.36	-0.32	-0.05	0.41	-0.31	-0.13	0.04	-0.11	0.14	-0.11	0.12	-0.14	-0.09	-0.21	-0.17	0.15	0.23	-0.2	-0.13	0.35	0	0.61	-0.01	-0.15	0.16	-0.18	0.07	-0.17	-0.19	-0.05	0.09	-0.01	0.04	0.47	0.32	0.32	-0.32	0.1
ALDOA	0.5	-0.28	-0.04	-0.15	-0.03	-0.67	0.06	-0.47	-0.29	0.06	-0.38	-0.59	-0.45	-0.22	-0.27	-0.17	-0.27	-0.27	-0.22	0.35	-0.03	-0.22	-0.24	-0.08	-0.02	-0.15	0.01	0.23	-0.09	-0.18	-0.34	-0.51	-0.22	-0.19	-0.13	-0.03	-0.12	-0.14	-0.05	-0.02	-0.06	-0.37	-0.03	-0.41	-0.27	-0.41	-0.19	0.28	0.05
ALDOB	-0.143333	-0.39	-0.02	-0.56	-0.493333	-0.486667	-0.353333	-0.323333	-0.44	-0.32	-0.433333	-0.3	-0.236667	-0.23	-0.313333	0.61	-0.36	-0.333333	-0.166667	-0.526667	-0.1	-0.44	-0.37	-0.23	-0.11	-0.296667	-0.206667	-0.133333	-0.193333	-0.146667	-0.143333	-0.4	-0.613333	-0.243333	-0.486667	-0.11	-0.176667	-0.236667	-0.136667	-0.103333	-0.126667	-0.346667	-0.233333	-0.15	-0.33	-0.373333	-0.42	-0.433333	-0.31
ALDOC	0.01	0.11	0.07	-0.08	0.67	0.04	0.27	-0.09	0.03	-0.11	0.08	-0.03	-0.19	0.12	0.22	0.06	0.19	-0.06	-0.04	-0.01	-0.08	0.12	-0.3	0.04	-0.21	-0.19	0.04	0.22	-0.08	-0.07	-0.12	-0.3	-0.28	-0.04	0.02	0.29	-0.17	0.08	0.17	-0.04	-0.3	0.02	-0.07	-0.04	-0.18	-0.01	-0.02	0.04	-0.29
ALG1	-0.0566667	-0.0725	0.156667	0.12	0.07	-6.94e-18	-0.075	-0.1475	-0.0175	-0.1975	0.045	-0.18	-0.085	0.08	0.2	-0.5075	0.135	-0.09	-0.0225	-0.12	0.1	0.3375	0.1875	0.2825	0.07	0.11	-0.095	-0.2325	-0.0675	-0.18	0.025	0.2275	0.175	-0.15	0.11	-0.03	0.04	0.0475	-0.145	-0.185	-0.31	-0.1525	-0.335	-0.0275	-0.3125	0.2075	0.363333	0.266667	0.065
ALG10	0.21	-0.28	-1.14	-0.51	-0.47	-0.21	-0.87	-0.29	-0.38	-0.54	-0.36	0	-0.31	-0.69	-0.38	0.57	-0.65	-0.39	-0.13	-0.54	-0.28	-0.51	-0.1	0.18	-0.71	-0.3	-0.48	-0.77	-0.18	-0.42	-0.79	-0.15	-0.3	-0.8	-0.5	-0.47	-0.24	-0.45	-0.84	-0.82	-0.15	-0.48	-0.38	-0.18	-0.84	0.08	-0.28	0.71	-0.55
ALG11	0.36	0.015	0.18	-0.315	0.055	0.6	0.1	0.18	-0.035	0.065	0.08	0.07	-0.075	-0.12	0.185	-0.88	-0.105	-0.035	0.11	0.79	0.015	0.175	0.225	-0.105	0.055	0.13	-0.49	-0.11	-0.04	-0.05	0.135	0.59	0.21	-0.31	-0.055	0.005	0.075	0.255	-0.005	-0.045	0.215	-0.19	-0.65	-0.125	-0.395	-0.11	0.39	NA	0.465
ALG12	-0.3	-0.15	-0.27	-0.21	-0.11	-0.14	-0.18	-0.11	-0.21	-0.1	-0.19	-0.27	-0.27	-0.05	-0.15	0.09	-0.13	-0.23	-0.33	-0.47	-0.18	-0.11	-0.25	-0.17	-0.23	-0.19	-0.18	-0.06	-0.12	-0.21	0.09	0.25	0.07	-0.29	-0.11	-0.17	-0.36	0.43	-0.13	-0.25	-0.31	-0.22	-0.24	-0.31	0.18	0.13	-0.14	-0.01	-0.25
ALG13	0.46	-0.06	0.78	0.53	-0.51	-0.51	-0.23	-0.27	0.13	-0.21	0.02	0.23	0.39	-0.2	-0.59	-0.3	0.03	0	-0.11	0.05	0.07	-0.24	-0.54	-0.38	0.04	NA	-0.17	-0.21	-0.2	-0.01	0.38	0.26	0.32	0.09	0.01	0.07	-0.14	0.23	0.12	-0.03	-0.39	0	-0.22	-0.12	0.14	-0.98	0.68	NA	0.25
ALG14	0.07	-0.22	0	0.04	0.08	-0.06	-0.23	-0.08	-0.23	-0.09	-0.14	-0.06	-0.03	-0.13	0.01	0.09	-0.32	-0.14	-0.07	-0.48	0.29	0.23	-0.11	-0.13	0.51	-0.04	-0.03	-0.14	-0.02	-0.17	-0.13	0.08	-0.02	-0.27	-0.29	-0.04	-0.19	0.11	-0.31	-0.4	0.07	-0.26	0.04	0.08	-0.39	-0.43	-0.62	0.01	-0.71
ALG2	-0.17	0.18	-0.19	0.31	0.18	-0.48	0.22	0.23	-0.49	0.06	0	0.08	0.25	-0.1	0.03	-0.19	-0.51	0.06	0.13	0.3	0.44	-0.26	0.22	-0.02	0.31	0.17	0.39	0.49	0.26	0.03	0.04	-0.16	0.09	0.2	-0.13	0.76	0.11	0.14	0.09	-0.16	0.18	-0.03	-0.42	0.12	-0.16	0.36	-0.09	-0.14	-0.24
ALG3	0.405	-0.165	0.06	-0.135	-0.225	0.07	-0.105	0.05	-0.11	-0.06	-0.05	0.255	-0.075	-0.01	0.125	-0.56	-0.135	-0.235	-0.13	0.58	-0.39	0.23	0.09	0.125	-0.71	-0.255	-0.1	-0.345	0.015	-0.245	-0.09	0.605	0.235	-0.325	-0.255	-0.175	0.16	0.3	-0.19	-0.16	-0.01	-0.1	0.155	0.02	-0.125	0.11	-0.08	0.295	0.275
ALG5	-0.18	0.21	0.36	0.21	0.49	0.33	-0.01	0.07	0.43	0.04	0.05	-0.18	-0.17	0.13	0.04	0.15	0.59	0.09	-0.15	0.19	-0.2	-0.02	0.03	0.25	-0.43	-0.06	0.05	-0.07	-0.33	0.11	-0.24	-0.23	-0.21	-0.17	0.3	-0.04	-0.06	-0.21	0.51	-0.06	0.01	-0.09	0.12	-0.03	0.15	-0.54	0.21	-0.53	-0.37
ALG6	-0.04	-0.02	-0.17	0.24	-0.33	0.12	0.12	0.42	-0.49	0.05	0	-0.18	-0.22	-0.19	0.23	-0.44	-0.42	-0.25	0.07	-0.07	0.3	-0.3	-0.38	-0.41	0.16	-0.13	0.16	0.48	0.09	0.07	0.09	0.44	0.3	0.28	-0.09	0.1	-0.13	0.58	-0.03	0.05	0.37	0.17	-0.22	0.11	0.99	0.44	0.15	-0.74	0.14
ALG8	-0.18	0.11	-0.02	0.17	-0.36	0.15	0.25	-0.17	0.05	0.29	0.01	0.06	-0.35	0.29	0.35	-0.4	0.13	0.06	-0.17	0.14	0.03	-0.39	-0.46	0.46	-0.07	-0.29	0.25	0.4	0.11	-0.02	-0.27	0.28	-0.04	0.15	-0.03	0.39	-0.21	0.31	0.23	0.99	0.4	0.25	-0.09	0.13	0.47	-0.36	-0.18	NA	-0.03
ALG9	-0.5	0.1	0.43	0.15	0.32	-0.13	0.59	0.25	0.28	0.44	0.43	0.02	-0.84	0.24	0.23	0.14	0.18	0.17	-0.19	0.18	-0.06	-0.13	-0.17	-0.08	-0.07	0	0.57	0.39	0.1	0.17	-0.54	0.15	-0.71	0.19	0.01	0.49	-0.15	0.33	0.46	0.3	0.49	0.32	-0.09	-0.01	-0.51	-0.49	0.21	-1.01	-0.69
ALK	-0.1075	-0.0425	-0.065	-0.025	-0.1025	-0.04	-0.1375	-0.1225	-0.09	-0.09	-0.1225	-0.1025	0.08	-0.03	0.01	-0.1225	-0.02	-0.0375	-0.1525	0.2275	0.2	-0.1525	-0.02	-0.1425	0.07	-0.0025	-0.15	-0.2025	-0.11	-0.0575	-0.035	0.0675	0.0875	-0.01	-0.035	-0.045	0.0125	0.075	0	-0.1	0.13	-0.1025	-0.0825	-0.095	0.045	-0.3725	0.025	-0.0925	-0.1075
ALKBH1	-0.12	0.14	NA	-0.16	0.18	-0.03	0.36	-0.15	-0.06	0.11	-0.14	-0.01	-0.03	-0.07	-0.47	0.2	0.02	0.07	0.12	-0.94	0.12	-0.37	-0.37	-0.34	0.15	0.25	0.01	0.12	0.03	0.11	-0.19	-0.06	-0.33	-0.09	-0.2	0.02	0.07	-0.15	0.11	0.01	0.28	0.04	0.01	-0.02	-0.4	-1.81	NA	-1.16	-0.53
ALKBH2	0.09	-0.08	0.2	-0.02	-0.36	-0.07	0.05	-0.04	-0.13	0.17	-0.03	-0.03	-0.05	-0.04	-0.2	0.12	-0.24	-0.05	0.3	-0.66	0.4	-0.12	-0.17	0.01	0.06	-0.03	0.08	-0.2	0.1	-0.06	-0.13	-0.25	-0.08	-0.2	-0.22	0.04	0.43	0.08	0.07	0.04	-0.1	-0.04	0.11	0.16	0.02	0.53	-0.35	0.56	0.06
ALKBH4	0.19	-0.07	0.3	0.13	0.08	0.16	-0.18	0.17	-0.01	-0.03	0	-0.02	0.37	0.14	0.09	-0.71	0.25	0.02	0.1	-0.12	0.34	-0.02	0.18	-0.03	0.22	0.33	-0.17	-0.21	-0.15	-0.19	-0.01	0.72	0.03	-0.15	0.25	-0.02	0.08	0.18	0.09	-0.17	-0.12	-0.22	0.2	0.12	0.02	-0.27	-0.74	0.66	0.3
ALKBH5	-0.24	0.05	NA	-0.24	-0.16	-0.11	0	-0.31	-0.2	0.01	0	-0.07	0.05	-0.11	-0.19	0.42	0.2	0.08	0.46	NA	-0.02	0.11	-0.13	-0.07	0.18	-0.2	0.07	-0.02	-0.05	0.02	-0.03	-0.08	-0.6	-0.22	0.02	0.47	-0.03	-0.12	-0.07	-0.13	-0.33	-0.12	0.25	-0.14	0.23	NA	NA	-0.5	0.83
ALKBH7	-0.04	0.12	0.18	-0.28	0.08	0.22	0.13	0.15	0	0.07	-0.05	0.03	-0.36	0.15	-0.12	-0.05	-0.07	-0.07	-0.08	-0.01	0.28	0.04	0	0.1	0.31	0.06	-0.07	0.5	0.06	-0.15	-0.04	-0.16	-0.13	-0.01	0.14	0.25	-0.14	0.39	-0.03	-0.18	-0.09	-0.17	0.02	-0.22	-0.03	-0.31	0.17	-0.41	-0.39
ALKBH8	-0.28	-0.23	NA	-0.06	0.42	0.12	0.08	-0.23	0.35	-0.21	-0.2	NA	0.03	0.34	0.23	0.46	0.03	0.16	0.29	0.12	0.05	0.19	0.44	0.52	-0.25	-0.24	-0.11	-0.34	0.01	-0.09	-0.2	0.54	0.11	0.15	-0.13	0.27	0.04	-0.44	0.05	0.26	0.36	0.17	-0.55	0.12	-0.75	NA	NA	NA	0.46
ALLC	0.2	0.045	-0.215	-0.08	-0.035	-0.235	0.065	0.12	0.005	0.105	-0.03	-0.015	-0.095	0.005	0.03	0.24	0.07	0.035	-0.045	-0.38	-0.305	-0.06	-0.03	-0.415	-0.185	-0.1	-0.33	-0.08	-0.11	-0.02	-0.135	-0.29	-0.13	0.055	-0.08	0.04	-0.07	0.275	0.17	0.18	-0.31	-0.035	0.055	-0.145	-0.24	0.12	-0.08	-0.34	-0.26
ALMS1	0.33	-0.235	-0.13	-0.145	-0.12	0.08	-0.365	-0.39	0.18	-0.025	-0.35	-0.1	-0.025	-0.15	-0.175	0.475	0.005	-0.13	-0.12	0.015	-0.39	-0.085	0.025	-0.16	-0.39	-0.105	-0.075	-0.615	-0.07	-0.135	-0.175	-0.17	-0.275	-0.34	-0.07	-0.17	-0.15	-0.39	-0.1	-0.295	-0.235	-0.395	-0.07	0.01	-0.745	-0.165	0.21	0.025	0.04
ALOX12	-0.5	0	0.11	-0.13	-0.05	0.17	0.16	0.3	0.15	0.11	0.23	0.03	-0.28	0.24	-0.32	-0.1	0.27	0.14	-0.08	0.51	NA	-0.48	-0.7	-0.01	NA	NA	0.34	-0.04	0.07	0.02	-0.46	-0.26	-0.17	0.05	0.11	-0.11	-0.22	-0.26	0.08	-0.16	0.11	0.02	0.02	0.2	-0.21	0.18	0.4	NA	-0.71
ALOX12B	NA	0.21	0	-0.16	0.13	0.06	0.18	0.17	-0.02	-0.05	0.11	0.11	0.16	0.11	-0.03	0.27	0.25	0.07	0.25	-0.08	0.11	-0.02	0.35	0.31	0.2	0.18	0	0.28	NA	0.11	-0.27	0.07	0.16	0.17	0.22	0.02	0.38	0.12	0.23	0.5	0.46	0.14	-1.26	0.11	0.08	0.08	0.63	-0.05	-0.25
ALOX12P2	-2.88e-18	0.0266667	-0.173333	0.0333333	0.186667	0.0166667	-9.25e-18	-0.196667	0.0366667	0.0233333	-0.196667	-0.06	0.3	0.13	0.17	-0.173333	-0.0333333	0.0866667	0.116667	0.0433333	0.473333	0.203333	0.0966667	0.06	0.503333	0.43	-0.0366667	-0.123333	-0.0266667	-0.0166667	0.06	0.11	0.27	0.166667	0.233333	-0.126667	0.0466667	0.00666667	-0.00333333	0.0666667	0.133333	-0.06	-0.133333	0.33	0.476667	0.03	0.48	0.315	0.275
ALOX15	0.03	-0.13	0.17	0.01	0.48	0.19	-0.27	0.1	-0.15	-0.12	-0.04	0.13	0.7	-0.12	0.28	-1.08	-0.25	-0.1	0.09	0.61	0.48	0.7	0.62	0.21	0.14	0.45	0.04	-0.18	0.08	-0.07	0.35	0.91	0.52	-0.11	-0.29	-0.26	0.05	0.16	-0.41	-0.59	0.17	-0.2	0.14	0.14	0.1	0.47	0.33	1.07	0.67
ALOX15B	-0.18	-0.09	0.13	0.23	-0.33	0.22	-0.38	0.36	-0.35	0.35	-0.18	-0.13	-0.32	-0.15	-0.46	0.53	-0.33	-0.12	0.45	0	0.45	-0.68	0.32	-0.2	0.35	0.22	-0.09	0.04	0.33	0.3	0.23	-0.12	-0.22	-0.49	-0.47	0.19	0.04	0.37	-0.04	0	0.3	0.09	0.59	0.23	0.68	NA	1.26	0.33	-0.77
ALOX5	-0.64	-0.37	-0.34	-0.28	0.27	-0.92	0.04	0.02	-1.28	-0.21	0.5	-0.09	-0.36	-0.75	-0.29	0.01	-0.72	-0.39	0.35	-0.4	0.27	-0.54	-0.55	-0.47	0.02	-0.11	0.2	0.49	-0.09	0.19	-0.17	-0.73	-0.13	0.54	-0.55	-0.05	0.14	-0.28	-0.74	-0.37	-0.37	0.24	-0.12	-0.32	0.06	-0.09	0.34	0.39	0.02
ALOX5AP	0.03	-0.31	0.25	-0.09	-0.52	-0.13	-0.32	0.37	-0.61	-0.18	-0.14	-0.63	-0.19	-0.55	0.47	-0.41	-0.5	-0.43	-0.19	-0.19	-0.14	-0.63	-0.66	0.02	-0.08	-0.46	-0.29	0.03	-0.08	-0.14	-0.09	0.01	0.15	-0.3	-0.67	-0.32	-0.48	0.24	-0.56	-0.16	-0.26	-0.43	-0.36	-0.63	0.61	0.67	-0.2	0.75	0.54
ALOXE3	0.27	-0.06	0.08	0.34	-0.13	0.29	0.14	0.1	0.38	0.05	0.15	0	-0.18	0.17	0.2	0.29	0.23	0.1	-0.2	-0.15	-0.34	-0.11	-0.27	0.08	-0.25	-0.26	0.17	-0.22	-0.1	0.13	-0.06	0.25	0.38	-0.04	0.22	-0.15	-0.1	-0.11	0.2	-0.25	-0.11	0.07	-0.08	-0.01	0.02	-0.34	-0.18	0.15	-0.14
ALPI	0.73	0.1	0.06	0.1	0.19	-0.3	0.2	0.44	-0.02	-0.19	-0.19	0.18	-0.17	-0.03	0.05	0.83	0.14	0.04	0.18	-0.44	-0.13	0.22	-0.33	0.59	-0.5	-0.22	0.16	-0.11	-0.04	0.03	-0.04	-0.1	0.1	-0.26	-0.03	0.08	0.13	-0.23	-0.1	0.02	-0.29	-0.19	-0.25	0.02	-0.51	-0.14	0.2	-0.01	0.41
ALPK1	-0.135	-0.13	-0.06	0.23	0.34	0.185	-0.065	0.105	-0.47	-0.095	0.06	0.22	0.185	-0.065	0.355	-0.68	-0.34	-0.05	0.225	0.505	0.125	-0.44	0.005	-0.005	0.405	-0.065	0.05	0.43	0.17	0.17	0.445	0.735	0.455	0.165	-0.115	0.005	0.125	0.28	-0.19	0.055	0.18	0.135	0.155	0.06	0.795	0.325	0.34	0.79	0.37
ALPK2	-0.34	0.26	0.19	0.05	-0.16	0.44	0.18	0.28	0.15	0.27	0.54	0.47	0.58	0.44	-0.13	-0.65	0.31	0.34	0.34	0.25	0.72	0.42	0.46	0.6	0.78	0.66	0.39	0.32	0.2	0.19	0.19	0.62	0.78	0.24	0.33	0.06	0.55	0.13	0.17	0.39	0.06	0.41	0.34	0.26	0.39	0.21	-0.12	0.3	0.3
ALPK3	NA	0.26	0.05	-0.23	-0.09	0.06	-0.01	0.07	-0.11	-0.01	-0.02	0.27	NA	-0.16	-0.04	0.84	-0.2	0.09	0.23	-0.56	0.36	-0.52	NA	-0.22	-0.07	-0.07	NA	-0.02	NA	-0.05	-0.04	-0.32	-0.01	0.38	-0.09	0	-0.09	-0.48	0.06	-0.06	0.22	0.27	-1.45	-0.2	-0.08	-0.33	0.31	0.41	NA
ALPL	-0.455	-0.18	-0.25	0.055	-0.085	-0.03	-0.115	-0.08	0.285	-0.17	-0.025	-0.08	-0.055	-0.095	-0.205	0.025	0.07	-0.095	-0.36	-0.345	-0.285	-0.185	-0.115	-0.01	-0.31	-0.3	-0.04	-0.41	-0.255	-0.13	-0.07	-0.15	-0.085	-0.33	0.01	-0.31	-0.26	-0.225	-0.115	-0.2	-0.44	-0.13	0.025	-0.225	-0.37	-0.17	-0.095	0.115	-0.15
ALPP	-0.375	-0.113333	-0.0666667	0.0366667	-0.05	-0.04	-0.06	-0.00333333	-0.11	-0.01	0.0666667	-0.116667	0.133333	-0.00666667	0.14	-0.193333	-0.0833333	-0.0333333	0.143333	0.156667	0.0466667	-0.0433333	-0.37	0.143333	0.51	-0.0366667	-0.286667	-0.186667	-0.22	-0.09	0.173333	0.323333	0.226667	-0.216667	0.163333	-0.186667	0.05	0.326667	-0.0733333	-0.176667	-0.37	0.05	0.116667	-0.296667	0.615	0.27	0.23	0.055	0.12
ALS2	0.045	0.035	-0.16	0.465	-0.04	0.175	0.01	0.135	-0.245	0.19	-0.135	0.05	0.37	-0.02	0.015	-0.465	-0.135	0.075	0.145	0.16	0.42	-0.04	0.315	0.21	0.24	0.38	0.02	0.345	-0.04	0.075	-0.085	-0.5	0.155	0.105	-0.005	0.17	0.365	0.295	0.09	-0.165	-0.055	-0.01	0.16	0.045	0.155	-0.21	0.525	-0.1	0.095
ALS2CR2	-0.52	0.5	0.04	0.99	0.08	0.52	-0.87	0.7	-0.48	-0.44	-0.15	-0.16	-0.07	-0.1	0.49	-0.32	-0.87	-0.27	-0.2	0.3	-0.39	0.2	0.18	0.42	-1.05	-0.34	1.22	-0.37	0.59	0.57	0.16	0.9	0.91	-0.39	-0.89	-0.05	0	0.28	-0.61	-0.94	0.13	0.08	0.09	0.55	-0.07	-0.11	0.61	0.38	0.46
ALS2CR8	0.265	-0.005	-0.09	0.015	0.26	-0.275	-0.1	-0.135	0.085	-0.155	0.055	0.065	0.02	-0.005	0.095	0.425	0.08	-0.035	-0.095	0.05	-0.18	0.17	0.135	-0.335	0.19	-0.075	0.05	-0.09	0.155	-0.1	-0.43	0.02	0.045	-0.09	0.06	0.05	0.01	0.025	-0.175	-0.25	0.16	-0.075	0.405	-0.02	-0.77	-0.035	-0.385	-0.13	-0.2
ALX3	-0.22	-0.01	0.16	0.04	-0.05	0.16	0.16	0.27	-0.23	0.3	0.09	-0.28	0.24	0.2	-0.48	0.11	-0.24	-0.08	0.1	0.2	0.42	-0.16	-0.18	-0.01	0.47	0.29	-0.09	0.24	-0.02	-0.04	0.06	0.27	-0.16	0.3	0.14	0.16	0.08	0.2	-0.17	0.16	0	0.01	0.08	0.18	0.33	0.12	-0.49	NA	0.51
AMACR	NA	-0.15	NA	0.01	-0.61	0.11	-0.115	-0.83	-0.05	0.03	-0.25	0.055	0.07	-0.01	-0.07	-0.12	-0.24	-0.36	-0.35	0.7	0.23	-0.56	-0.33	-0.175	0.08	0.02	0.03	-0.07	0.025	-0.23	-0.485	-0.94	-0.025	0.07	0.06	0.07	-0.16	-0.4	0.03	0.12	0.81	-0.255	-0.69	-0.2	NA	-0.78	-0.745	NA	0.32
AMBN	-0.28	0.13	NA	-0.26	0.49	-0.11	-0.08	0.42	0.35	0.06	0.13	-0.06	-0.41	0.34	-0.16	-0.18	0.26	0.04	-0.18	0.27	-0.46	0.19	0.1	0.34	-0.25	-0.2	-0.12	-0.63	-0.14	-0.11	-0.29	0.07	-0.08	-0.26	0.06	-0.39	-0.17	0.27	0.16	0.11	-0.1	-0.31	-0.06	-0.42	-0.7	-0.5	0.2	NA	0.3
AMBP	-0.35	-0.11	0.16	-0.02	0.13	0.11	0.4	0.25	-0.4	0.25	0.13	-0.27	-0.59	0.09	0.06	-1.08	-0.25	-0.2	-0.14	-0.12	-0.27	-0.07	-0.42	-0.14	-0.2	-0.24	0.26	0.36	-0.1	-0.34	0.2	-0.17	0.39	0.14	-0.21	0.2	-0.02	0.36	0.02	0.36	-0.27	0.02	0.55	0.02	0.53	-0.02	0.34	-0.28	-0.57
AMD1	-0.47	-0.17	-0.23	-0.14	0.15	-0.55	0.31	0.32	-1	-0.01	-0.05	-0.17	-0.64	-0.45	-0.05	-0.16	-0.65	-0.33	0.56	0.19	-0.06	-0.67	-0.2	-0.52	0.05	-0.21	0.29	0.71	-0.1	0.04	0.07	0.27	-0.14	0.4	-0.28	0.1	0.06	0.04	-0.48	0.02	0.79	-0.23	-0.35	-0.05	0.18	-0.02	0.01	0.13	0.56
AMDHD2	0.47	0.05	-0.16	-0.2	0.34	-0.14	0.18	0.03	-0.11	0.08	0.13	-0.27	-0.03	-0.07	-0.02	0.11	-0.16	-0.04	0.16	-0.18	0.09	-0.57	-0.25	-0.14	0	-0.3	-0.15	0.17	-0.11	-0.05	-0.15	-0.37	-0.03	0.06	0.07	0.06	0.05	0.35	0.13	0.23	-0.22	0.13	-0.45	-0.25	-0.48	-0.58	-0.12	-0.59	-0.66
AMFR	-0.233333	-0.13	-0.06	-0.163333	-0.406667	-0.0866667	-0.0733333	-0.195	-0.0366667	-0.0566667	-0.193333	-0.283333	-0.346667	-0.106667	-0.0566667	-0.0166667	-0.06	-0.163333	-0.203333	-0.09	-0.203333	-0.0266667	-0.283333	-0.16	-0.323333	-0.0933333	-0.186667	-0.113333	-0.0833333	-0.196667	-0.0133333	-0.14	-0.153333	-0.226667	0.02	-0.0933333	-0.06	-0.236667	0.0433333	-0.04	0.01	-0.183333	-0.306667	-0.13	-0.51	0.06	-0.125	-0.08	-0.193333
AMH	-0.13	0	0.32	0.32	0.02	0.52	0.24	0.25	0.67	0.01	0.2	0.04	-0.17	0.52	0.29	-0.36	0.6	0.28	-0.1	0.13	0.22	0.31	0	0.19	0.1	0.16	0.18	0.23	-0.05	-0.11	0.69	0.83	0.48	0.26	0.35	0.16	0.09	-0.09	0.45	0.16	-0.29	0.1	0.53	0.07	0.04	-0.03	0.13	0.28	0.17
AMHR2	-0.22	-0.38	-0.46	-0.23	0.01	-0.11	-0.22	-0.07	-0.19	-0.16	-0.07	-0.34	-0.28	-0.32	-0.16	0.12	-0.24	-0.41	-0.35	-0.32	-0.27	0.15	-0.3	0.11	-0.38	-0.41	-0.18	-0.1	-0.19	-0.38	0.24	-0.22	0.25	-0.34	-0.58	-0.2	-0.59	0.27	-0.38	-0.2	0.25	-0.36	-0.05	-0.46	0.11	-0.01	-0.17	0.02	-0.3
AMIGO1	-0.14	-0.065	-0.15	0	0.07	0.23	-0.215	-0.06	0.02	0.025	-0.145	0.145	0.335	-0.145	-0.025	-0.305	-0.115	-0.09	0.11	0.185	0.045	0.3	0.305	0.155	-0.085	0.255	-0.02	-0.4	0.13	-0.15	-0.28	0.12	0.075	-0.15	-0.2	-0.065	-0.045	0	-0.195	-0.255	0.1	-0.175	0.065	0.11	-0.33	0.15	-0.01	0.165	0.2
AMIGO3	1.01	-0.16	-0.18	0.3	0.24	-0.25	-0.04	-0.32	-0.41	0.09	-0.43	-0.16	-0.18	-0.2	-0.13	0.75	-0.12	-0.12	0.06	-0.24	0.1	-0.47	-0.22	-0.19	0.05	0.03	-0.16	0.22	0.07	0.12	0	-0.55	-0.03	0.05	0.14	0.03	-0.13	-0.11	-0.06	-0.13	-0.42	-0.09	-0.46	-0.29	0.2	-0.31	-0.43	0.4	0.22
AMMECR1	-0.04	0.3	-0.05	0.08	-0.14	0.1	0.14	0.06	0.49	0.16	0.21	0.28	-0.38	0.22	0.09	0.5	0.33	0.09	-0.16	-0.15	-0.29	-0.02	-0.2	0.39	-0.44	-0.32	0.05	-0.38	0.11	-0.06	-0.27	-0.36	-0.19	-0.22	0.17	-0.17	-0.03	-0.1	0.07	-0.17	0.21	0.13	0.12	-0.27	-0.52	-0.36	-0.4	-0.4	0.01
AMMECR1L	-0.05	0.16	-0.1	0.47	-0.1	-0.28	-0.08	-0.2	-0.1	0	-0.44	-0.14	-0.1	-0.11	0.08	0.1	-0.01	-0.16	-0.03	-0.29	0.34	-0.61	0.13	-0.06	0.21	0.06	-0.02	0.02	-0.1	-0.27	0.21	-0.3	-0.2	0.12	0.03	0.46	0.08	0.32	0.1	-0.21	0.23	-0.05	-0.14	-0.02	0.56	0.21	-0.21	-0.14	-0.04
AMN	-0.19	-0.14	-0.1	-0.12	-0.46	-0.15	-0.32	-0.25	0.33	-0.14	-0.4	-0.36	0.02	-0.19	-0.16	0.61	0.19	0.03	-0.36	-0.2	-0.63	-0.15	-0.07	0.04	-0.71	-0.21	-0.34	-0.77	-0.42	-0.16	0.01	-0.42	-0.4	-0.36	0.12	-0.33	0.01	-0.69	-0.3	-0.56	-0.37	-0.49	-0.04	-0.4	-0.54	-0.54	-0.52	-0.4	-0.23
AMOT	-0.43	-0.07	0.55	NA	-0.14	0.09	0.07	NA	-0.14	-0.4	-0.1	0.04	0.21	-0.18	NA	-0.26	0.47	-0.1	-0.11	NA	-0.59	-0.49	0.03	-0.54	0.05	-0.23	-0.3	-0.39	-0.34	-0.06	-0.52	0.21	-0.89	-0.17	0.17	-0.43	0.4	-0.3	0.25	0.16	0.78	-0.05	NA	-0.4	0.12	NA	0.24	NA	NA
AMOTL2	0.23	0	-0.06	0.09	0.54	0.16	0.11	0.21	0.07	-0.02	0.06	0.03	-0.1	0.02	0.02	0.48	0.11	0.09	-0.01	0.14	-0.36	0.27	0.16	0.3	-0.19	-0.06	0.3	-0.09	0.03	0	0.07	-0.29	0.02	-0.08	-0.04	-0.03	-0.26	-0.19	0.04	-0.11	0.22	-0.05	0.09	-0.02	-0.24	-0.09	-0.07	0.14	0.16
AMPD1	NA	NA	0.09	-0.49	0.2	-0.83	-0.19	NA	0.04	0	0.11	NA	NA	-0.37	-0.36	NA	-0.11	0.2	NA	-0.16	-0.2	-0.76	-0.29	NA	-0.44	0.04	NA	0.01	NA	NA	-0.68	0.19	NA	NA	0.08	-0.39	0.06	0.6	0.04	NA	NA	NA	0.18	NA	NA	NA	NA	NA	NA
AMPD2	-0.22	-0.41	-0.2	-0.245	-0.525	-0.525	-0.33	-0.46	-0.195	-0.18	-0.455	-0.47	-0.33	-0.46	-0.465	0.35	-0.33	-0.225	-0.27	-0.605	-0.275	-0.055	-0.37	0.025	-0.265	-0.275	-0.235	-0.125	-0.245	-0.22	-0.435	-0.48	-0.335	-0.12	-0.215	-0.165	-0.34	-0.495	-0.48	-0.34	-0.03	-0.365	-0.3	-0.515	-0.315	-0.295	-0.23	-0.19	-0.15
AMPD3	0.23	-0.02	0.18	0.12	-0.62	0.39	-0.06	-0.04	-0.25	0.03	0.1	-0.19	-0.19	-0.1	0.04	0.24	-0.25	-0.2	-0.16	-0.36	0.06	-0.1	-0.48	-0.33	-0.11	-0.25	-0.16	0.28	-0.11	-0.19	-0.16	-0.35	-0.29	0.11	0.05	-0.08	-0.05	0.08	0.15	0.46	-0.2	0.18	-0.17	-0.16	0.27	-0.84	0.19	NA	-0.54
AMPH	0.37	-0.04	-0.28	0.1	0.26	0.14	-0.23	0.09	-0.15	-0.29	-0.1	-0.03	0.12	0.03	0.26	-0.39	-0.33	-0.08	-0.13	0.32	0.46	0.32	0.22	0.13	0.44	0.37	-0.25	0.01	-0.07	-0.09	0.15	0.27	0.34	-0.1	0.03	-0.09	0.11	0.23	0.01	-0.2	0.03	-0.16	-0.03	0.03	0.54	-0.07	0.14	-0.03	-0.25
AMT	-0.1	-0.48	0.13	-0.18	-0.14	0.16	-0.7	0.26	-0.3	-0.41	-0.03	0.46	0.13	-0.21	0.3	-0.17	-0.12	-0.32	-0.02	0.73	-0.75	0.59	0.23	0.5	-0.92	-0.08	-0.18	-0.81	0.15	-0.12	-0.32	0.73	0.02	-0.59	-0.74	-0.35	0.01	0.03	-0.48	-1.1	0.2	-0.33	0.18	0.23	-0.48	0.05	0.05	0.62	0.42
AMY2B	-0.13	0.05	-0.1	-0.02	-0.235	-0.01	0.005	-0.21	-0.115	-0.105	0.06	0.005	-0.24	-0.07	-0.085	-0.22	0.03	-0.04	-0.16	-0.555	-0.185	-0.32	-0.225	0.05	-0.18	-0.095	-0.01	-0.22	0.005	-0.06	0.13	0.055	-0.1	0.135	-0.115	0.025	-0.03	-0.265	0.16	0.09	0.19	-0.035	-0.595	0.145	0.23	0.135	0.69	0.3	0.31
ANAPC1	0.31	0.1	0.42	-0.6	0.09	-0.07	NA	0.34	-0.24	0.01	-0.09	-0.19	-0.48	0.18	0.11	0.11	0.05	-0.09	-0.16	0.17	-0.24	0.02	-0.17	-0.12	-0.22	-0.2	0.09	0.15	-0.08	0.25	-0.1	0.07	0.06	0.09	-0.11	0.23	-0.01	0.1	0.01	0.08	0.3	-0.01	0.36	-0.08	NA	-0.35	-0.3	-0.6	0.64
ANAPC10	-0.04	0.1	-0.06	-0.07	0.17	0.14	NA	0.02	-0.2	0.02	-0.02	-0.08	-0.14	-0.18	-0.37	-0.42	-0.05	0	0.24	0.68	0.02	0.13	0.17	-0.76	-0.13	0.13	0.14	0.25	0.1	0.21	-0.49	-0.34	0.29	0.19	-0.24	0.09	0.07	0.31	-0.05	-0.29	-0.06	0.08	0.92	0.06	NA	0.44	NA	NA	-0.21
ANAPC11	0.41	-0.07	0.24	-0.09	0.24	-0.05	0.38	0.21	-0.11	0.3	0.28	-0.12	-0.19	0.14	-0.21	-0.56	-0.11	-0.15	-0.2	-0.04	0.01	0.16	-0.12	-0.13	-0.15	-0.76	0.17	0.49	-0.16	0.1	0.43	0.29	0.36	-0.09	0.16	-0.09	-0.03	0.27	0.14	0.04	-0.04	0.06	-0.01	0.22	0.56	-0.01	0.09	0.07	-0.45
ANAPC13	-0.13	-0.66	-0.45	-0.38	0.44	-0.42	-0.59	-0.48	-0.07	-0.61	-0.34	-0.67	-0.43	-0.52	-0.58	0.97	-0.18	-0.5	-0.74	-0.71	-1.02	-0.09	-0.27	-0.56	-1.12	-0.71	-0.68	-1.21	-0.73	-0.65	0.06	-0.51	-0.6	-0.68	-0.46	-0.52	-0.54	-0.85	-0.63	-0.83	0.06	-0.79	-0.06	-0.91	-0.48	-1.01	-0.69	-0.61	-0.54
ANAPC2	-0.41	-0.07	-0.07	0.21	0.04	0.41	-0.17	0.07	0.06	-0.05	0.13	0.08	0.23	0.15	0.18	-0.47	0.23	0.09	0.12	-0.03	0.33	0.18	0.32	0.23	NA	0.28	-0.05	-0.46	-0.2	0.08	0.24	0.32	0.4	0.04	0.16	-0.06	1	0.07	0.2	-0.25	-0.13	0.11	0.01	0.1	0.41	0.05	-0.1	0.02	0
ANAPC4	0.21	-0.2	0.45	0.29	-0.32	0.09	0.19	0.24	-0.17	0.16	0.25	-0.05	-0.45	-0.12	0.07	-0.21	-0.15	0.03	-0.29	0.34	0.02	-0.1	-0.29	0.66	-0.14	-0.01	0.03	0.26	-0.06	-0.14	0.29	0.38	0.3	0.04	-0.05	-0.08	-0.07	0.1	0.13	0.27	0.06	0.24	0.15	-0.02	0.28	0.08	0.07	-0.21	NA
ANAPC5	0.0666667	-0.0433333	0.266667	0.0833333	0.526667	0.01	-0.0833333	-0.106667	-0.19	-0.06	-0.0933333	-0.156667	0.03	-0.0533333	0.03	-0.46	0.06	-0.123333	-0.223333	0.113333	0.0766667	-0.0933333	0.12	-0.156667	-0.1	0.133333	-0.02	-0.09	-0.206667	0.0333333	0.516667	-0.0866667	0.48	-0.05	-0.07	-0.176667	-0.02	0.296667	0.15	0.01	-0.0733333	-0.11	-0.0133333	-0.21	0.123333	-0.0666667	0.0466667	-0.34	0.0966667
ANAPC7	0.86	0.25	0.21	0.15	0.22	0.29	0.04	-0.01	0.06	-0.11	-0.09	0.08	0.63	0	0.2	0.01	0	0.25	0.34	0.53	0.42	0.54	0.39	0.47	0.35	0.68	0.04	0.03	0.17	0.24	0.63	0.37	0.27	0.27	0.12	0.01	0.12	0.44	-0.04	-0.22	0.12	0.13	0.18	-0.16	0.53	-0.25	0.19	0.67	1.03
ANG	0.68	-0.22	0.25	-0.02	-0.07	0.05	-0.11	-0.09	-0.27	-0.12	-0.14	-0.19	-0.31	-0.01	-0.34	0.56	-0.22	-0.27	-0.06	-0.31	0.29	0.09	0.07	-0.29	0.18	0.12	-0.15	0.02	-0.28	-0.15	-0.17	-0.01	-0.27	-0.05	-0.31	0.08	-0.09	0.09	-0.18	-0.06	-0.16	-0.01	-0.5	0.15	-0.16	0.16	0.11	0.49	-0.42
ANGEL1	-0.18	0.15	0.01	0.46	-0.38	0.31	-0.62	-0.11	0.03	-0.19	-0.13	0.34	1.13	-0.16	0.06	0.47	-0.17	0.02	0.26	0.27	-0.12	0.25	0.62	0.34	-0.21	0.35	-0.09	-0.68	0.08	-0.09	0.03	0.3	0.45	-0.33	-0.18	-0.42	0.21	0.27	-0.44	-0.96	-0.19	-0.2	0.47	0.1	-0.61	-0.09	-0.04	1.52	0.75
ANGEL2	0.32	-0.09	-0.07	0.02	-0.24	-0.25	0.12	0.13	-0.05	0.07	0.08	-0.15	0.25	-0.33	-0.18	0.26	-0.16	-0.12	0.37	0.12	0.2	-1.25	0.14	0.57	0.02	0.1	-0.4	0.07	NA	-0.11	-0.13	0.13	0.09	-0.21	0.03	0.14	0.24	-0.01	-0.26	0.03	-0.06	-0.07	-0.35	-0.13	0.1	-0.52	0.63	-0.13	-0.95
ANGPT1	NA	-0.27	NA	-0.28	0.36	-0.12	-0.15	0.98	-0.23	0.05	0.14	-0.11	-0.41	0.12	NA	0.23	0.17	-0.25	-0.23	1.1	-0.16	0.94	0.26	0.81	-0.54	NA	-0.01	0.01	-0.04	0.09	0.01	0.03	-0.62	0.08	0.2	0.06	0.01	0.24	0.23	0.63	NA	0.08	0.16	0.05	NA	NA	NA	NA	NA
ANGPT2	0.43	0.27	NA	-0.39	-0.27	-0.09	0.24	0.16	0.09	0.26	0.09	0.25	0.01	0.04	0.47	0.36	0.14	0.23	0.03	0.23	-0.13	-0.04	-0.09	-0.1	-0.35	-0.09	0.12	-0.04	0.07	0.09	-0.07	-0.67	-0.08	-0.08	-0.08	-0.04	0.17	-0.06	0	0.25	0.05	0.1	-0.14	0.18	-0.29	NA	-0.6	-0.2	0.28
ANGPT4	-0.11	0.08	0.23	0.04	0.42	-0.14	0.19	-0.2	-0.33	0.22	0.02	-0.15	-0.51	0.05	-0.22	0.12	-0.17	-0.17	0.09	0.13	0.03	-0.83	-0.56	-0.83	0.12	-0.13	-0.11	0.26	-0.06	-0.02	-0.28	-0.16	-0.02	0.07	0.06	0.07	-0.03	-0.2	-0.05	0.19	-0.01	0.03	0.29	0.15	-0.03	-0.68	-0.09	-0.64	-0.58
ANGPTL1	1.39	-0.2	0.25	0.4	-0.76	0.28	-0.1	-0.24	0.19	-0.09	0.15	0.04	-0.26	0.06	0.18	0.24	0.3	-0.09	0.01	-1.17	-0.21	-0.02	-0.34	NA	-0.27	-0.38	-0.11	-0.29	-0.23	-0.08	-0.16	NA	0.08	-0.18	-0.27	-0.01	-0.2	0.36	-0.1	0.45	-0.44	-0.03	1.14	-0.2	-0.32	0.4	0.65	NA	NA
ANGPTL2	NA	-0.25	NA	-0.07	0.7	0.34	-0.13	0.17	0.58	NA	NA	0.19	0.15	-0.27	0.36	0.03	0.07	0.21	0.21	-0.44	0.61	0.2	-0.52	-0.4	0.65	-0.02	0.08	-1	-0.3	NA	0.22	0.4	0.52	0.49	0.42	-0.33	-0.09	0.19	0.09	NA	0.02	NA	NA	NA	0.67	0.3	NA	NA	0.31
ANGPTL3	NA	-0.23	NA	NA	NA	NA	0.58	NA	0.37	NA	-0.51	0.15	NA	0.21	-1.15	-2.2	-0.25	NA	0.4	0.01	0.41	NA	NA	NA	NA	NA	-0.06	0.16	NA	NA	0.46	NA	NA	0.24	0.62	NA	0.42	0.09	-0.27	0.81	NA	NA	NA	NA	NA	NA	NA	NA	NA
ANGPTL4	-0.33	0.01	-0.13	0.26	-0.22	0.19	-0.03	-0.49	-0.23	0.21	-0.13	-0.13	0	0.03	0.33	-0.01	-0.02	0.08	0.01	-0.34	0.12	-0.15	-0.18	0.09	0.11	-0.04	-0.1	0.05	-0.11	-0.03	-0.28	-0.06	-0.01	-0.13	0.26	-0.18	-0.25	-0.06	0.17	0.11	-0.14	0.01	-0.38	0.01	-0.01	-0.03	-0.41	-0.12	-0.36
ANGPTL6	0.28	-0.1	-0.14	0.13	-0.34	0.09	-0.16	-0.03	0.22	-0.1	-0.05	0.52	0.06	0.14	0.19	-0.01	0.25	0.2	0.02	-0.05	-0.19	0.58	0.33	0.23	-0.35	0.11	0.07	-0.42	0.25	0.09	-0.16	-0.09	-0.12	-0.28	0.05	-0.07	-0.11	-0.31	0.02	-0.52	-0.19	-0.01	0.18	0.21	-0.61	0.03	-0.43	0.07	-0.38
ANGPTL7	-0.41	-0.04	-0.44	0.26	0.06	0.12	-0.06	-0.08	-0.14	-0.09	0.01	0.01	0.32	0.1	0.25	0.65	-0.04	-0.12	-0.23	-0.18	-0.47	0.12	-0.06	-0.23	-0.37	-0.12	0.03	0	0.08	-0.05	-0.27	-0.2	0.01	-0.19	-0.27	-0.06	-0.13	-0.04	0.1	-0.32	-0.2	-0.13	0.07	-0.04	-0.3	-0.63	-0.21	0.71	-0.29
ANK1	0.345	0.0275	-0.23	0.0325	0.1775	0.1175	-0.0575	0.05	0.175	-0.16	-0.06	0.115	0.035	0.02	0.1425	0.2875	0.145	0.0875	0.0025	-0.24	-0.1125	0.21	0.0425	-0.17	-0.155	-0.0125	0.0875	-0.295	0.015	-0.085	-0.03	-0.0575	-0.0725	-0.0975	-0.0325	0.0075	-0.0675	-0.035	-0.015	-0.3025	-0.01	0.0575	0.04	-0.035	-0.0575	-0.065	-0.02	-0.343333	-0.2825
ANK2	0.36	0.115	0.3	0.185	0.055	0.16	-0.07	0.27	0.23	-0.26	0.345	-0.115	-0.655	0.16	0.415	-0.345	0.02	0.065	-0.33	0.465	-0.195	-0.065	-0.44	0.29	-0.05	-0.155	-0.04	-0.14	-0.05	-0.07	-0.05	0.35	0.01	-0.08	0.12	0.025	-0.04	-0.18	0.145	0.445	0.385	0.025	0.47	0.06	0.27	-0.39	-0.19	-0.14	0.53
ANK3	1.69	-0.21	-0.16	0.15	-0.33	-0.09	0.16	0.23	0.22	0.21	-0.01	0.14	-0.11	0.32	-0.08	-0.17	0.18	0.02	-0.13	0.96	-0.12	0.57	-0.87	0.41	-0.18	-0.38	0.23	0.16	0.07	0.04	0.49	0.07	0.17	0.24	0.01	-0.02	-0.14	0.59	0.16	0.12	0.19	-0.01	0.01	0.27	0.4	-0.28	NA	NA	0.35
ANKFY1	-0.07	0.08	-0.14	-0.02	-0.02	-0.11	0.35	0.08	0.08	0.18	0.28	0.13	-0.3	0.06	0.18	-0.09	0.19	0.07	-0.13	0.15	-0.32	-0.02	-0.24	-0.19	-0.31	-0.23	0.24	0.44	0.03	0.05	-0.21	-0.26	0.17	0.18	0	0.24	-0.15	-0.14	0.16	0.15	0.07	0.21	0.14	0.08	-0.36	0.43	-0.19	-0.98	0.06
ANKH	-0.29	-0.23	-0.16	-0.27	0.28	-0.22	-0.26	-0.29	-0.43	-0.44	-0.26	-0.19	-0.08	-0.4	-0.27	0	-0.19	-0.23	-0.4	-0.11	-0.31	0.17	0.08	0.08	-0.41	-0.31	-0.24	-0.41	-0.36	-0.11	0.3	0.04	-0.07	-0.34	-0.3	-0.31	-0.16	-0.21	-0.51	-0.72	-0.22	-0.37	-0.13	-0.36	-0.29	-0.22	-0.19	-0.14	-0.16
ANKHD1	-0.146667	0.00666667	-6.94e-18	0.258333	0.0683333	0.016	-0.171667	0.116667	-0.305	0.00666667	-0.473333	-0.34	-0.168333	-0.213333	0.121667	-0.0783333	-0.261667	-0.198333	0.06	-0.168	0.146667	-0.144	-0.208333	-0.0516667	0.166667	0.0466667	-0.0233333	0.14	-0.158333	-0.0566667	0.0166667	-0.111667	-0.108333	-0.0366667	0.01	0.025	-0.118333	-0.00833333	-0.111667	-0.0583333	0.325	-0.316667	-0.206	-0.168333	0.0383333	0.162	-0.1225	-0.0475	-0.128
ANKIB1	-0.02	-0.15	-0.49	0.11	0.09	0.1	-0.13	-0.06	0.29	0.07	-0.23	-0.01	-0.15	-0.06	0.19	0.49	0.09	0.17	0.11	0.12	-0.07	0.03	0.18	-0.05	-0.08	0.21	-0.09	-0.26	-0.08	-0.04	0.07	-0.19	-0.45	-0.07	0.26	-0.07	-0.15	-0.37	-0.1	-0.08	-0.17	-0.12	-0.05	-0.03	-0.85	-0.69	-0.37	0.26	-0.19
ANKMY1	-0.263333	0.08	0.236667	0.0866667	-0.09	-0.0833333	-0.0333333	-0.07	-0.116667	-0.01	-0.03	0.11	-0.0133333	-0.03	0.04	0.16	0.0533333	0.13	0.0666667	-0.04	0.07	-0.116667	-0.0633333	0.456667	0.276667	0.0666667	-0.0133333	-0.0866667	0.0633333	0.06	-0.38	-0.1	-0.1	-0.113333	0.173333	0.0133333	0.0133333	0.106667	0.0966667	0.126667	-0.05	0.03	-0.103333	-0.0733333	0.313333	-0.193333	0.12	0.36	-0.523333
ANKMY2	-0.23	0.05	-0.54	0.1	0.58	0.36	-0.05	0.03	0.01	-0.35	0.01	0.16	-0.02	-0.27	0.11	-0.69	-0.07	0.04	-0.26	0.55	-0.38	NA	0.08	0.08	1.59	0.06	-0.1	-0.58	-0.21	-0.19	-0.17	0.92	0.13	-0.36	-0.24	-0.11	-0.01	0.12	0.04	-0.4	0.35	-0.01	0.04	-0.24	-0.34	-0.33	-0.17	NA	-0.04
ANKRA2	0.04	0.19	0.04	0.09	-0.01	-0.01	0.11	0.15	0.1	0.1	0.23	0.1	-0.22	0.16	0.36	-0.14	0.31	0.09	-0.24	-0.27	-0.26	0.1	0.13	0.16	-0.43	NA	0.28	0.09	0.15	-0.01	0.17	-0.75	-0.23	0.16	-0.02	-0.01	-0.21	0.55	0.01	0	0.03	0.07	-0.66	0.1	0.72	-0.03	0.21	NA	0.18
ANKRD10	-0.04	-0.065	-0.015	0.09	0.14	-0.42	-0.1	0.255	-0.55	0.195	-0.23	-0.235	-0.485	-0.2	0.07	-0.12	-0.605	-0.395	0.185	0.02	0.305	-0.04	-0.21	-0.135	0.18	0.09	-0.415	0.34	-0.055	0.05	-0.29	0.125	0.1	0.085	-0.215	0.205	-0.1	0.345	-0.105	-0.115	0.2	-0.27	-0.485	0.745	0.165	0.175	-0.35	NA	-0.2
ANKRD11	-0.225	-0.055	0.29	-0.59	-0.82	0.055	-0.185	-0.125	-0.005	-0.11	-0.025	0.2	-0.09	-0.085	-0.18	0.215	-0.28	0.315	-0.015	-0.665	0.215	0.11	-0.28	-0.125	0.42	0.285	-0.03	-0.18	0.075	0.46	0.03	0.27	0.28	-0.035	0.085	-0.04	0.095	-0.005	-0.225	-0.145	-0.145	0.175	-0.29	0.115	0.285	0.34	0.225	NA	0.35
ANKRD12	0.235	-0.1	0.44	0.045	-0.31	-0.155	-0.19	0.07	-0.535	-0.095	-0.08	0.025	0.22	-0.585	-0.22	0.175	-0.695	0.04	0.205	-0.255	0.355	0.02	0.09	0	0.365	0.14	-0.195	0.13	-0.01	0.04	0.08	0.18	-0.035	0.095	-0.155	0.055	-0.005	0	-0.43	-0.355	0.18	0.21	-0.565	0.03	0.06	0.11	0.26	-0.495	0.35
ANKRD13A	-0.52	-0.0966667	-0.0466667	-0.07	0.31	0.116667	-0.05	-0.103333	0.243333	-0.13	0.103333	0.16	0.05	-0.103333	-0.00333333	0.276667	0.1	0.0933333	-0.236667	-0.0666667	-0.38	0.136667	0.0133333	0.16	-0.41	-0.0366667	-0.153333	-0.553333	-0.265	-0.0866667	0.153333	-0.226667	-0.0433333	-0.2	0.0166667	-0.333333	-0.18	-0.273333	-0.0366667	-0.576667	-0.23	-0.0666667	-0.0866667	-0.32	-0.6	-0.433333	-0.123333	-0.133333	-0.09
ANKRD13C	NA	0.04	NA	-0.64	-0.04	-0.03	0.17	0.23	0.04	-0.08	0.08	-0.21	-0.08	-0.39	NA	-0.38	-0.24	0.13	0.2	0.39	0.28	-0.75	0.37	-0.74	0.42	0.02	-0.32	-0.33	0.44	0.05	-0.15	-0.06	-0.17	0.19	0.19	0.06	0.11	0.3	-0.28	0.22	-0.06	-0.36	0.43	0.22	0.64	NA	NA	NA	NA
ANKRD13D	0.72	0.03	-0.38	0.09	0.49	0.16	0.19	-0.01	0.15	-0.16	0.03	0.19	0.21	-0.03	0.1	0.33	0.01	0.05	0.17	-0.28	NA	-0.34	-0.13	-0.21	NA	0.26	-0.02	-0.04	0.09	0.25	-0.18	-0.78	-0.18	0.23	0.16	-0.01	-0.14	-0.32	0.07	-0.11	-0.17	-0.16	-0.3	0.02	0.11	-0.15	0.08	-0.36	0.15
ANKRD15	-0.23	-0.005	0.31	0.015	0.34	0.105	-0.085	-0.005	0.135	-0.09	-0.02	-0.115	0.35	0.195	0.035	-0.665	0.175	-0.03	-0.135	0.435	-0.055	0.105	0.02	0.42	-0.14	-0.12	-0.095	-0.27	-0.175	0.045	0.06	0.315	0.435	-0.16	0.59	-0.235	0.155	0.01	0.045	-0.1	-0.185	-0.135	0.335	-0.065	0.115	-0.145	0.08	0.615	0.21
ANKRD16	-0.06	-0.11	0.47	-0.92	-0.13	-0.3	-0.06	-0.26	-0.46	-0.47	-0.51	-0.15	-0.32	-0.54	-0.57	1.18	-0.86	-0.28	-0.03	-0.52	0.13	-0.25	0.36	-1.28	-0.24	-0.13	-0.66	0	-0.07	-0.08	-0.57	-0.35	0.39	-0.06	-0.24	-0.25	0.13	-0.34	-0.55	-0.23	-0.15	-0.09	-0.45	-0.2	-0.68	-0.67	0.3	-0.51	0.44
ANKRD17	-0.05	-0.065	-0.0866667	0.0525	-0.2175	-0.0475	0.1825	-0.0675	-0.38	0.1275	-0.1475	-0.25	-0.0725	-0.0275	0.0933333	-0.1	-0.2575	-0.1025	0.1925	-0.175	0.1475	-0.355	0.0275	-0.39	0.365	0.3375	0.095	0.155	-0.0775	-0.075	0.1325	-0.2425	0.045	0.1375	-0.0325	0.1875	0.015	-0.11	0.08	0.055	0.03	0.015	0.07	-0.06	0.4675	-0.0225	0.113333	0.305	-0.2675
ANKRD18A	-0.25	0.03	0.12	-0.09	-0.4	-0.02	-0.11	0.08	0.14	-0.15	-0.16	-0.01	0.03	0.02	-0.14	-0.28	0.16	-0.09	0.1	0.57	-0.11	0.07	0.16	0.33	-0.07	0.06	0.17	-0.36	0.09	-0.05	-0.41	-0.08	0.33	0	-0.15	0.15	0	-0.08	0.05	-0.08	0.29	-0.11	-0.27	-0.05	-0.24	-0.01	-0.08	-0.32	-0.17
ANKRD18B	0.57	-0.04	-0.2	-0.16	-0.27	-0.29	0	-0.02	-0.05	-0.04	0.09	-0.12	0.01	-0.07	-0.03	0.37	-0.07	0.04	-0.18	0.55	-0.18	-0.01	0.24	-0.13	-0.15	-0.12	0.01	-0.32	-0.06	-0.09	-0.45	-0.35	-0.23	0.01	-0.09	-0.1	-0.08	-0.21	-0.08	-0.14	-0.08	-0.04	0.08	-0.21	-0.58	-0.16	-0.13	-0.15	-0.09
ANKRD19	-0.2	-0.05	-0.08	0.03	-0.8	0.09	-0.14	-0.26	0.27	-0.18	0	-0.01	0.25	-0.11	-0.2	0.63	-0.01	0.12	-0.24	-0.14	-0.38	0.25	-0.04	-0.1	-0.26	0.07	-0.28	-0.9	-0.43	-0.24	-0.1	0.48	-0.28	-0.28	0.03	-0.35	-0.12	-0.22	0.06	-0.43	0.07	-0.04	0.12	-0.38	-0.02	-0.31	-0.58	-0.51	-0.09
ANKRD20A1	0.12	-0.08	-0.156667	0.0825	-0.43	-0.45	-0.0575	-0.135	-0.1475	-0.02	-0.215	-0.1775	-0.17	-0.07	0.1025	-0.065	-0.3175	-0.175	-0.2975	0.4075	0.005	-0.33	-0.3125	-0.06	0.18	-0.14	-0.1825	0.5	-0.165	-0.205	-0.095	0.335	-0.085	-0.12	-0.11	-0.0925	0.0675	-0.2925	-0.0825	0.015	0.25	0.0175	0.47	-0.06	-0.3625	-0.133333	-0.26	0.536667	0.465
ANKRD24	-0.49	0.02	0.21	0.2	-0.08	-0.01	0.02	0.12	0.1	0.03	0.24	0.37	0.5	-0.01	-0.04	0.17	0.07	0.25	0.49	0.35	0.43	0.05	0.59	0.25	0.62	0.6	-0.14	-0.02	0.26	0.43	0.21	0.6	0.33	0.43	0.3	0.04	0.41	0.25	-0.1	0.01	-0.2	0.21	0.61	0.41	0.04	0.28	0.33	0.31	0.25
ANKRD25	-0.075	0.1	0.03	-0.01	0.01	0.0666667	0.16	0.193333	0.22	0.0233333	0.206667	-0.0366667	-0.116667	0.06	-0.143333	0.163333	0.123333	0.0433333	-0.17	0.566667	-0.426667	0.176667	-0.07	0.09	-0.216667	-0.0466667	-0.0233333	-0.106667	-0.0133333	-0.08	0.26	-0.365	-0.203333	0.04	-0.12	-0.196667	-0.0366667	-0.17	0.133333	-0.11	0.383333	-0.01	0.143333	-0.136667	1.55333	-0.176667	-0.14	-0.46	-0.0966667
ANKRD26	-0.33	0.09	-0.34	-0.15	-0.32	0.32	0.16	0.31	0.11	-0.04	0.16	0.18	0.01	-0.05	-0.15	0.32	0	0.11	0.29	0.66	0.3	0.03	-0.2	0.15	NA	-0.03	0.33	0.37	-0.02	-0.1	0.2	0.05	0.09	0.34	0.13	0.24	0.08	-0.13	0.29	0.16	0.35	-0.05	0.15	-0.24	0.06	-0.67	-0.02	NA	-0.14
ANKRD27	-0.36	-0.23	-0.44	-0.15	-0.7	0.01	-0.22	-0.16	-0.21	-0.04	-0.2	-0.08	0.21	-0.15	0.09	0.42	-0.39	-0.06	0	-0.51	-0.05	-0.16	-0.13	-0.25	0.03	-0.14	-0.15	-0.27	-0.04	-0.03	0.04	-0.59	-0.32	-0.02	-0.26	-0.16	-0.16	-0.34	-0.14	-0.44	-0.74	-0.09	-0.17	-0.13	-0.42	0.34	-0.39	-0.71	0.26
ANKRD28	-0.01	-0.05	0.02	0.17	-0.21	0.09	-0.08	0.19	0.12	0.11	0.21	0.38	0.36	-0.02	0.13	0.23	-0.04	0.2	0.3	0.26	0.23	-0.07	0.41	0.42	-0.02	0.6	0.05	0.31	0.42	0.12	0.23	0.39	0.07	0.37	0.22	0.2	0.3	-0.05	0.15	0.31	-0.41	-0.02	0.25	0.43	-0.09	-0.23	0.68	-0.42	NA
ANKRD30A	NA	0.73	NA	0.29	NA	0.83	-0.03	0.43	-0.02	NA	NA	0.72	NA	0.23	0.75	0.16	0	0.41	-0.01	NA	NA	NA	0.84	NA	NA	-0.4	-0.13	NA	-0.18	NA	NA	NA	NA	-0.21	0	-0.59	NA	0.31	-0.07	-0.47	1.16	-0.55	NA	NA	NA	NA	NA	NA	NA
ANKRD30B	0.03	-0.05	-0.15	-0.1	-0.03	-0.02	-0.18	-0.12	-0.26	-0.07	-0.1	0.01	0.31	-0.06	0.04	-0.24	-0.22	-0.12	0.05	-0.33	-0.01	-0.44	0.2	-0.17	0.01	0.15	-0.15	0.02	-0.02	0.04	-0.12	-0.22	0.19	-0.08	-0.18	-0.11	-0.04	-0.01	-0.15	0.12	0.26	0.06	0	-0.33	0.16	0.12	0.18	-0.42	-0.34
ANKRD32	NA	-0.03	-0.63	-0.01	0.28	0.23	-0.01	0.75	-0.7	-0.07	-0.44	0.12	0.34	-0.2	-0.63	-1.33	-0.41	-0.12	0.45	1.15	1.25	-0.2	0.15	0.42	0.81	0.94	-0.24	-0.17	0.02	-0.18	-0.11	-0.32	0.87	0.26	-0.28	0.39	-0.66	0.19	-0.16	-0.39	1.18	NA	0.51	0.04	0.76	0.29	NA	0.58	NA
ANKRD33	0.26	0.06	0.11	-0.33	0.28	-0.06	0	-0.39	0.22	0.26	0.09	-0.06	0.49	0.13	-0.05	-0.21	0.08	0.08	0.27	0.34	0.34	0.47	0.46	0.49	0.93	0.4	0.1	-0.03	0.05	0.06	1.79	0.47	0.61	0.12	0.25	-0.19	0.18	0.33	0.18	0.2	0.35	-0.01	0.37	-0.01	0.55	0.14	0.26	0.25	-0.08
ANKRD38	0.37	-0.1	0.25	-0.05	-0.7	-0.46	0.05	0.08	-0.15	0.01	-0.5	-0.64	-0.37	-0.1	NA	-0.29	-0.27	-0.63	0.2	-0.26	0.01	-0.11	-0.48	0.17	-0.06	0.02	-0.34	-0.64	-0.47	-0.06	-0.59	0.3	-0.12	0.17	0.39	0	-0.01	0.06	-0.29	0.38	-0.36	-0.09	-0.75	-0.18	NA	0.42	0.07	0.54	0.31
ANKRD39	-0.32	-0.18	-0.18	0	-0.62	0.04	-0.13	-0.25	-0.13	-0.25	-0.05	-0.31	-0.07	-0.05	0.22	-0.15	0.05	-0.13	-0.14	-0.21	-0.23	0.16	-0.03	-0.16	-0.15	-0.12	-0.17	-0.21	-0.46	-0.24	-0.09	0.16	-0.02	-0.29	0.04	-0.18	-0.29	0.32	0.02	-0.04	0.5	-0.22	-0.33	-0.08	0.45	-0.29	-0.95	-0.08	-0.12
ANKRD40	-0.3	-0.17	-0.11	-0.33	-0.2	-0.34	0.17	-0.36	-0.79	0.06	-0.12	-0.53	0.05	-0.03	-0.06	0.34	-0.65	-0.24	0.17	-0.65	0.27	-0.58	-0.37	-0.89	0.5	-0.02	-0.21	0.33	-0.12	-0.16	-0.19	-0.62	-0.48	-0.02	-0.32	0.38	0.04	-0.27	-0.36	-0.14	-0.34	0.09	-0.11	-0.06	0.11	0.1	0.23	-0.39	-0.34
ANKRD44	-0.02	0.02	-0.52	-0.81	0.14	NA	NA	0.45	-0.88	0.67	0.45	-0.09	-0.42	NA	-0.59	-0.15	-0.57	0.02	0.46	0.1	-0.04	-0.34	0.12	-0.18	0.41	0.54	-0.27	0.56	0.01	0.08	-0.21	0.2	-0.48	0.09	-0.1	0.19	0.28	-0.74	-0.2	-0.08	0.02	0.24	-0.33	0.12	NA	1.25	NA	NA	-0.09
ANKRD46	0.64	0.07	-0.09	0.17	0.4	0.28	-0.03	-0.03	0.1	-0.03	0.12	0.16	-0.07	0.1	0.16	0.14	0.34	0.2	0.19	-0.49	0.02	0.51	0.05	0.22	0.17	0.05	0.09	-0.15	0.02	0.09	0.47	0.08	-0.03	-0.16	0.05	-0.03	-0.18	0.08	0.14	-0.04	-0.26	0.11	-0.04	0.03	0.1	0.23	-0.07	0.05	0.06
ANKRD47	-0.43	-0.71	-0.21	-0.36	0.2	-0.22	-0.77	-0.6	-0.34	-1	-0.45	-0.51	-0.3	-0.59	-0.44	0.51	-0.31	-0.44	-0.85	-0.45	-0.87	-0.14	-0.44	-0.34	-1	-0.55	-0.75	-1.15	-1	-0.64	-0.17	-0.21	-0.36	-0.8	-0.52	-0.82	-0.54	-0.7	-0.51	-1.22	-0.73	-0.63	-0.1	-0.79	-0.67	-1.09	-1.13	-1.44	-0.92
ANKRD49	NA	0.22	0.29	0.31	-0.88	-1.13	-0.17	-0.22	-0.45	0.52	-0.47	-0.24	-0.19	-0.7	0.01	-0.55	-0.93	-0.26	-0.06	0.65	0.06	-0.42	NA	0.8	0.04	-0.43	0.01	0.44	0.02	0.25	-0.08	0.84	-0.14	0.2	0.1	-0.07	-0.12	0.43	-0.53	-0.32	-0.27	-0.15	-0.45	0.45	0.41	-0.21	-0.93	NA	NA
ANKRD5	-1.78	0.1	NA	-0.09	NA	-0.02	0.17	0.11	-0.04	-0.37	0.19	0.21	0.23	-0.02	0.08	-0.25	-0.28	0.12	0.14	0.13	0.14	0.25	-0.51	-0.03	0.32	NA	0	0.2	0.06	0.34	-0.19	-0.01	0.48	0.2	0.03	0.2	-0.04	-0.04	0.04	0.23	-0.95	0.2	NA	0.28	0.42	-0.42	NA	NA	-0.01
ANKRD50	-0.32	-0.11	0.02	-0.16	0.1	0.25	-0.16	0.17	-0.37	-0.11	0.17	0.56	0.41	-0.07	0.35	-0.71	-0.18	-0.02	0.23	0.25	0.47	0.53	0.29	0.26	0.12	0.71	0.12	-0.36	0.31	0.22	0.11	0.4	0.53	-0.25	-0.38	-0.19	0.08	0.19	-0.41	-0.83	-0.87	0.13	0.27	0.51	-0.04	0.65	0.24	0.88	0.26
ANKRD53	0.45	0.26	-0.3	0.09	0.36	-0.06	0.27	0.1	0.02	0.23	-0.1	0.06	0.17	-0.14	0.06	0.18	-0.17	0.02	0.1	0.56	-0.03	-0.14	0.23	-0.42	-0.03	-0.07	0.11	0.1	0.03	0.1	0.05	-0.45	-0.2	-0.18	-0.14	0.29	0.12	0.27	-0.02	0.12	0.06	0.03	0.07	0.03	-0.47	NA	-0.81	-0.95	0.14
ANKRD54	-0.48	0.18	-0.18	0	0.72	0.24	0.07	0.15	0.04	-0.26	0.03	0.05	0.41	0.2	0.16	-0.54	-0.07	0.03	0.07	-0.14	0.33	0.23	0.12	0.03	0.1	0.19	-0.11	0.09	0.18	-0.04	0.32	-0.22	0.12	0.03	0.06	0.12	0.01	0.18	-0.05	-0.34	0.36	-0.03	-0.23	0.33	0.3	0.7	0.49	0.66	0.16
ANKRD55	0.64	0.41	-0.12	0.45	0.07	0.08	-0.1	0.15	-0.03	-0.01	-0.05	-0.03	-0.1	0.01	0.34	-0.57	0.04	0.07	0.18	0.95	0.56	0.48	-0.16	0.62	0.41	0.19	-0.08	0.19	0.36	-0.16	0.45	0.65	0.79	0.13	0.37	-0.1	0.34	0.44	-0.17	0.22	0.26	0.04	0.12	0.07	0.39	0.18	0.56	-0.16	0.6
ANKRD57	1.27	-0.09	0.69	-0.17	-1.01	-0.27	-0.18	0.3	0.41	0.02	0.21	0.21	-0.09	0.19	-0.07	-0.53	0.51	0.31	0.27	0.29	0.26	-0.18	-0.32	0.28	-0.31	-0.2	-0.07	-0.47	-0.24	-0.01	0.41	0.23	0.36	-0.14	0.1	0.01	-0.07	0.55	0.22	-0.32	0.2	-0.02	-0.32	-0.3	0.71	0.41	0.39	0.75	0.77
ANKRD6	-0.36	0.13	-0.05	0.16	-0.27	-0.17	0.27	0.33	-0.01	-0.2	-0.05	0.02	0.06	-0.09	-0.15	0.67	0.1	0.17	-0.05	-0.09	-0.44	0.25	-0.09	0.06	-0.11	-0.19	0	0.18	-0.05	0.25	0.29	-0.1	-0.26	0.15	-0.31	0.21	-0.03	-0.25	-0.15	-0.05	-0.67	0.25	0.1	0.09	-0.62	0.07	0.35	-0.26	-0.23
ANKRD7	NA	-0.25	NA	0.23	-0.21	0.99	0.99	0.27	0.39	-0.47	-0.07	0.14	-0.52	0.13	0.08	-0.66	0.14	0.13	-0.4	0.22	0.76	0.18	-0.48	-0.91	NA	0.67	-0.22	-0.18	-0.25	-0.24	0.48	0.78	0.6	0.16	0.14	0.23	0.01	-0.03	-0.02	0.39	NA	0.25	-1.15	-0.61	NA	NA	NA	NA	NA
ANKS1A	0.03	-0.21	0.08	-0.09	0.6	-0.26	-0.16	-0.05	-0.19	-0.11	-0.33	-0.39	-0.36	-0.13	-0.08	0.06	-0.04	-0.24	-0.04	-0.46	-0.05	-0.49	-0.23	-0.26	0	-0.15	-0.02	0.03	-0.18	-0.24	-0.35	-0.46	-0.24	-0.07	0.06	-0.1	-0.22	-0.2	-0.08	0.07	0.26	-0.31	0.02	-0.32	-0.04	-0.3	-0.06	0.02	-0.43
ANKS1B	0.31	NA	-0.18	0.39	-0.02	0.27	NA	0.26	NA	NA	NA	NA	-0.12	NA	0.14	0.18	NA	NA	-0.05	0.01	-0.3	0.35	-0.11	0.18	-0.2	-0.1	NA	NA	NA	NA	0.14	-0.08	0.39	NA	NA	NA	NA	0.16	NA	NA	0.55	NA	0.17	NA	0.24	-0.13	-0.07	0.09	0.02
ANKS3	0.04	-0.12	0.98	NA	NA	-0.07	-0.47	NA	0.21	-0.25	0.13	-0.17	-0.44	0.12	0.18	-1.12	-0.31	-0.05	0.22	-0.5	-0.06	-0.14	-0.19	-0.62	0.3	0.36	-0.54	0.32	-0.08	-0.42	0.15	2.27	0.57	0.12	0.21	0.44	0.19	0.88	0.09	0.46	0.53	0.1	NA	0.48	NA	0.32	0.84	NA	NA
ANKZF1	0.43	-0.35	-0.27	0	0.48	-0.3	-0.02	0.05	-0.25	-0.26	0.03	-0.37	-0.35	-0.16	0.06	0.19	-0.35	-0.32	-0.21	-0.51	-0.05	-0.31	-0.37	-0.29	-0.21	-0.27	-0.04	-0.14	-0.22	-0.23	-0.06	-0.72	-0.39	-0.23	-0.24	-0.17	-0.3	-0.25	-0.19	0.01	-0.31	-0.23	-0.23	-0.15	-0.08	-0.35	-0.3	-0.22	-0.26
ANLN	-0.58	0	-0.04	0.26	-0.38	0.16	0.09	-0.16	-0.36	0.21	-0.04	-0.41	0.34	-0.13	0.25	-0.28	-0.39	0	0.24	0.14	0.43	-0.83	0.09	0.26	NA	0.48	0.06	0.23	0.32	0.19	0.34	NA	-0.35	0.16	0.22	0.27	0.22	0.09	-0.16	0.19	0.64	-0.1	0.51	0.16	-0.07	-0.18	0.09	NA	0.55
ANP32A	0.185	0.5	0.21	0.57	-0.385	0.105	0.365	0.285	0.15	0.325	0.11	0.03	-0.315	-0.1	-0.225	-0.145	0.01	-0.01	-0.115	0.365	-0.095	-0.205	-0.385	0.53	-0.19	-0.075	0.31	0.835	0.215	0.12	0.11	0.2	0.315	0.295	0.285	0.265	0.275	0.085	0.03	0.555	-0.055	-0.12	0.06	0.045	0.16	-0.31	0.07	NA	NA
ANP32B	-0.23	0.5	-0.21	0.11	-0.2	0.03	0.44	0.38	-0.83	0.59	0.04	0.05	-0.51	-0.55	0.19	-0.32	-1.23	0.18	0.34	-0.17	0.31	-0.55	0.14	-0.5	-0.02	-0.11	0.2	0.29	0.14	0.18	0.09	-0.02	0.06	0.2	-0.45	0.37	0.14	0.54	-0.52	-0.3	0.3	0.16	-0.33	0.27	0.25	-0.22	0.93	NA	-0.17
ANP32E	0.225	-0.25	0.05	-0.025	-0.645	-0.19	-0.105	-0.415	-0.225	0.1	-0.08	0.015	-0.235	-0.405	-0.335	0.78	-0.33	-0.03	0.03	-0.725	0.04	-0.085	0.05	-0.5	0.065	-0.035	0.09	-0.08	0.155	-0.015	-0.265	-0.37	-0.31	-0.06	-0.285	0.195	-0.44	-0.38	-0.37	-0.175	-0.39	0.035	-0.55	0.04	-0.245	-0.225	-0.67	-0.535	-0.36
ANPEP	-0.41	-0.36	-0.46	-0.26	0.22	-0.12	0.1	-0.21	-0.1	NA	-0.11	-0.31	-0.33	-0.12	-0.14	-0.12	0.18	-0.21	-0.14	0.1	-0.18	-0.13	-0.41	-0.14	0.13	-0.13	0.09	0.09	-0.42	0.12	0.04	0.08	-0.27	-0.02	-0.11	-0.1	-0.12	-0.1	-0.06	-0.5	0.46	0.08	-0.19	-0.25	0.13	-0.04	0.23	0.37	0.26
ANTXR1	0.73	-0.4	0.0366667	-0.336667	0.17	-0.296667	-0.216667	-0.24	-0.136667	-0.435	-0.17	-0.266667	-0.0233333	-0.243333	-0.303333	0.0833333	-0.0966667	-0.173333	-0.246667	-0.276667	-0.323333	0.16	-0.02	-0.0733333	-0.393333	-0.236667	-0.223333	-0.433333	-0.34	-0.26	0.17	-0.353333	-0.0833333	-0.383333	-0.31	-0.4	-0.39	-0.233333	-0.22	-0.483333	-0.203333	-0.256667	-0.2	-0.32	-0.35	-0.87	-0.946667	0.17	-0.256667
ANUBL1	-0.32	-0.14	0.46	-0.09	-0.29	-0.05	-0.33	0.07	-0.24	-0.26	-0.21	0	-0.44	-0.14	-0.51	-0.13	0.01	-0.12	-0.28	-0.12	-0.03	-0.24	-0.08	-0.24	-0.36	0.12	-0.34	-0.24	-0.21	-0.26	-0.02	0.56	-0.55	-0.65	-0.14	-0.1	-0.1	-0.16	-0.19	-0.23	0.52	-0.21	-0.54	-0.21	-0.09	-0.45	-0.63	NA	0.3
ANXA1	0.29	0.14	0.8	0.07	-0.3	-0.25	0.11	0.12	-1.19	-0.19	-0.42	-0.5	-0.43	-0.99	-1.33	-0.13	-1.33	-0.46	-0.42	-0.4	1.14	0.31	-0.93	-0.76	-0.19	-0.38	0.63	0.97	0.4	0.5	0.19	0.24	-0.45	0.53	-0.33	-0.09	0.18	0.12	-0.16	0.08	0.13	0.57	-1	1.21	1.52	-0.52	0.81	NA	-1.59
ANXA10	0.08	-0.25	-0.48	0.29	0.05	0.56	-0.2	0.05	-0.11	0	0.1	-0.02	-0.27	0.16	0.17	-0.11	0.07	-0.28	-0.43	0.48	-0.46	0.16	-0.22	0.38	-0.54	-0.49	-0.14	-0.09	0.08	-0.15	0.08	0.37	0.53	-0.02	-0.16	-0.36	-0.08	0.52	0.24	0.28	0.31	0.09	-0.14	-0.23	0.36	0.31	NA	NA	0.38
ANXA11	-0.16	-0.17	-0.22	-0.28	-0.72	-0.45	0.11	-0.11	-0.33	0.06	0.19	0.01	-0.02	-0.2	-0.3	0.12	-0.14	0.09	0.35	-0.14	0.19	-0.88	-0.67	-0.26	-0.06	-0.32	0.02	0.13	0.13	0.11	-0.09	-0.54	-0.21	0.18	-0.16	0.06	0.17	-0.14	-0.22	-0.23	-0.12	0.55	-0.21	-0.33	1.11	-0.01	-0.37	-0.39	-0.14
ANXA13	NA	-0.08	NA	NA	NA	0.13	0	NA	0.03	0.09	0.03	-0.02	NA	0.16	1.04	0.15	-0.01	-0.04	0.2	NA	-0.16	NA	NA	NA	NA	NA	0.14	0.26	0.03	0.12	NA	0.34	-0.51	0.14	-0.17	0.36	0.04	0.27	0.04	0.41	NA	0.08	NA	0.13	NA	0.82	0.62	NA	NA
ANXA2	0.425	0.285	0.44	0.31	-0.215	0.05	0.21	0.27	-1.29	0.255	-0.055	-0.32	-0.86	-0.77	-0.57	-0.88	-1.48	-0.105	-0.05	0.42	0.085	0.03	-0.295	0.21	-0.06	0.065	0.73	0.8	0.195	0	-0.105	0.585	0.585	0.35	-0.665	0.025	0.045	0.025	-0.49	-0.51	0.6	-0.01	-0.145	0.42	0.365	-1.095	-0.075	-0.77	0.03
ANXA2P1	0.21	0.29	0.42	-0.09	0.3	0.15	0.05	0.02	-0.61	0.06	0.1	-0.13	-0.04	-0.18	-0.45	-0.72	-0.77	-0.02	-0.08	0.41	0.36	0.02	0.06	0.36	-0.07	0.58	0.26	0.14	-0.04	0.06	-0.07	0.4	0.29	0.16	-0.18	0.01	0.21	-0.27	-0.09	-0.36	0.61	0.25	0.15	0.6	0.39	-0.08	0.66	0.49	0.47
ANXA3	NA	-0.12	NA	-0.35	0.99	-0.66	-0.22	0.79	-0.64	-0.64	0.1	0.97	NA	-0.28	1.27	-0.17	-0.39	-0.45	0.31	0.77	NA	NA	NA	NA	-0.38	NA	0.34	1.09	0.25	0.99	NA	NA	0.44	1.17	-0.49	-0.03	-0.06	0.4	-0.74	-0.04	0.72	-0.04	NA	-0.14	NA	2.38	1.01	NA	NA
ANXA4	-0.21	0.33	0.08	0.31	0.04	-0.61	0.05	0.44	-1.15	0.25	-0.09	-0.11	-0.6	-0.28	0.13	-0.67	-0.97	-0.26	0.16	0.42	0.84	-0.34	-0.16	0.29	0.45	NA	0.49	0.64	-0.16	0.13	0.15	0.44	0.45	0.26	-0.17	-0.08	-0.02	0.22	0.16	-0.2	0.19	0.12	NA	0.15	0.82	0.03	0.48	NA	0.02
ANXA5	-0.09	-0.04	0.12	-0.24	0.07	-0.41	0.12	0	-0.61	0.01	0.03	-0.24	-0.4	-0.33	-0.22	-0.6	-0.45	-0.17	-0.02	0.24	-0.2	-0.19	-0.37	0.18	-0.13	-0.36	0.52	0.4	-0.15	-0.12	0.12	0.01	-0.07	-0.04	-0.5	-0.21	-0.36	0.01	-0.05	-0.17	0.37	0.06	-0.27	-0.1	0.21	-0.53	-0.18	-0.25	-0.19
ANXA6	0.18	0.28	0.16	0.49	0.3	0.04	0.07	-0.33	-1.01	0.43	-0.14	-0.34	-0.63	-0.39	0.08	-0.55	-0.9	-0.28	-0.56	-0.01	0.41	-0.5	-0.42	-0.16	0.19	-0.11	0.2	0.76	-0.09	-0.02	0.18	-0.15	-0.15	-0.11	-0.37	0.2	0.22	0.06	0.12	0.37	0.16	-0.09	-0.24	0.43	-0.08	-0.52	-0.2	NA	0.42
ANXA7	-0.02	0.115	0.22	0.18	-0.295	-0.18	-0.495	0.12	-0.48	0.135	-0.165	-0.06	-0.505	-0.18	-0.03	-0.16	-0.365	-0.135	0.085	-0.115	0.01	-0.255	-0.34	-0.305	-0.105	0.025	-0.04	0.22	0.12	-0.105	-0.225	0.015	0.1	0.125	0	-0.06	-0.11	0.28	-0.14	-0.06	0.4	-0.21	0.055	-0.115	0.05	-0.225	0.055	-0.04	0.2
ANXA8	-0.71	0.18	-0.05	-0.21	-0.71	-0.16	-0.15	-0.32	-0.2	0.18	0.2	0.22	NA	-0.24	-0.37	0.61	0.03	0.23	0.19	-0.27	0.33	-0.2	NA	0.24	0.04	-0.1	-0.23	-0.12	-0.17	-0.05	-0.1	-0.17	-0.03	0.05	-0.03	0.23	-0.02	0.04	-0.21	-0.42	NA	0.28	0.57	0.35	NA	-0.07	-0.05	NA	-0.39
ANXA9	-0.13	0.18	NA	0.1	-0.09	0.75	0.23	0.14	0	-0.06	0	0.05	-0.08	0.25	-0.29	-0.12	0.21	0.03	-0.21	0.29	-0.19	-0.39	-0.19	-0.07	0.13	-0.19	0.25	0.38	-0.09	0.14	0.33	0.28	-0.24	0.19	0.13	0.06	-0.09	-0.14	0.1	0.15	-0.22	0.02	0.41	-0.3	NA	0.12	0.46	-1.02	-0.84
AOAH	-0.24	-0.1	0.27	0.02	-0.83	-0.32	-0.2	-0.2	-0.95	0.05	0.08	-0.23	-0.1	-0.3	-0.32	-0.45	-0.59	-0.08	0.03	0.22	0.22	-0.41	-0.03	0.12	0.31	-0.07	-0.08	0.43	0.2	0.01	0.25	0.01	-0.18	0.2	0.01	-0.05	0.48	0.25	-0.05	-0.08	0.37	0.41	0.04	-0.04	0.64	0.26	-0.31	-0.06	0.13
AOC2	-0.025	0.03	-0.165	-0.085	0.26	-0.165	0.15	0.12	0.34	0.115	0.06	0.03	-0.5	0.035	-0.04	0.345	0.315	-0.015	-0.31	0.085	-0.46	0.01	-0.34	-0.005	-0.41	-0.455	0.02	-0.105	0.005	-0.105	-0.415	-0.505	-0.26	-0.16	0.055	-0.175	-0.065	0.03	0.065	0.07	-0.2	-0.065	0.085	-0.3	-0.155	0.155	0.065	-0.395	-0.055
AOC3	0.19	-0.52	-0.13	-0.22	-0.4	-0.06	-0.57	-0.25	-0.14	-0.56	-0.41	-0.37	0.06	-0.57	-0.09	0.28	-0.39	-0.5	-0.54	-0.24	-0.6	-0.09	-0.14	0.08	-0.7	-0.36	-0.48	-0.81	-0.55	-0.46	-0.04	-0.46	-0.38	-0.48	-0.53	-0.33	-0.79	-0.43	-0.68	-0.76	0.06	-0.54	-0.13	-0.67	-0.24	-0.57	-0.58	-0.08	-0.04
AOF1	0.2	0.14	-0.02	0.15	-0.14	0.23	0.03	0.15	0.26	0.04	-0.02	0.35	0.23	0.16	0.41	0.46	0.36	0.28	0.01	-0.65	0.06	0.29	0.44	-0.18	0.18	0.43	0.05	-0.38	-0.02	0.17	0.33	-0.38	-0.01	-0.08	0.37	-0.23	-0.11	-0.2	0.11	0.14	0.38	0.25	-0.21	0	-0.4	0.62	0.09	-0.06	-0.05
AOF2	-0.21	0.09	0.24	0.23	1.95	0.26	0	0.06	0.05	0.06	0.19	-0.13	0.28	0.23	0.06	-0.46	0.11	0.08	0.17	0.47	0.67	0.46	0.14	0.14	0.43	0.34	-0.03	0.28	0.01	0.02	0.5	0.36	0.41	0.07	0.27	-0.3	0.03	0.4	0.37	0.38	0.25	-0.02	0.17	-0.27	0.73	-0.05	0.13	-0.18	0.13
AOX1	-0.48	0	-0.04	0.05	-0.13	0.32	-0.14	0.01	0.15	0.01	-0.21	-0.29	0.1	0	-0.21	0.2	0.23	0.17	0.17	-0.59	0.2	-0.26	-0.01	-0.42	0.39	0.03	-0.15	0.12	-0.06	0.05	0.01	-0.46	-0.32	0.24	0.29	0.08	-0.13	0.13	0.06	0.36	-0.27	-0.01	0.03	0.2	-0.17	-0.34	-0.31	NA	-0.25
AP1B1	0.34	-0.06	0.04	0.21	-0.01	0.24	0.07	0.02	0.17	1.36	0.09	-0.04	0	0.03	0.19	-0.05	0.25	0.19	-0.08	-0.42	0.07	0.09	-0.15	0.51	-0.13	NA	-0.02	-0.3	0.01	-0.15	0.54	0.14	0.26	-0.24	0.32	-0.1	-0.21	-0.46	0.09	-0.39	-0.07	0.04	-0.01	0.15	-0.59	0.45	0.18	-0.39	0.03
AP1G1	-0.72	0.015	0.05	-0.16	0.065	-0.02	-0.175	-0.2	0.02	0.03	-0.235	-0.02	0.29	0.115	0.07	-0.055	-0.025	-0.03	0.35	0.145	0.28	-0.145	0.085	0.445	0.27	0.31	-0.12	-0.065	0.15	0.11	-0.04	-0.075	-0.2	-0.07	-0.1	-0.115	-0.02	0.135	-0.195	0.005	-0.01	0.015	-0.18	-0.065	-0.62	-0.62	-0.08	0.62	0.53
AP1G2	-0.3	-0.07	-0.04	-0.16	0.34	-0.11	-0.04	-0.27	0.26	-0.09	0.02	0.03	-0.39	0.15	-0.15	-0.16	0.28	0.02	-0.46	-0.38	-0.4	0.29	-0.3	0.09	-0.44	-0.31	-0.3	-0.4	-0.01	-0.23	-0.02	-0.08	0.09	-0.14	-0.01	-0.23	-0.19	-0.05	0.04	-0.36	0.12	0.02	0.08	-0.54	-0.07	-0.39	-0.58	-0.24	-0.33
AP1GBP1	0.375	-0.07	-0.1	-0.08	-0.115	-0.315	-0.01	0.085	-0.16	-0.08	-0.035	-0.25	-0.635	-0.215	0.04	0.285	-0.225	-0.015	-0.26	-0.215	-0.14	-0.24	-0.755	-0.095	-0.425	-0.345	0.09	-0.03	-0.17	-0.1	0.05	0.15	-0.195	0	-0.135	-0.19	-0.19	-0.16	-0.175	-0.195	0.17	-0.06	0.04	-0.245	-0.23	-0.425	-0.565	-0.09	-0.32
AP1M1	1.26	-0.37	0.11	0.07	0.54	0.27	-0.65	0.33	-0.12	-0.24	0.06	0.26	0.18	-0.18	0.19	0	-0.27	-0.06	-0.05	-0.04	-0.47	0.12	0.04	0.38	-0.57	-0.15	-0.38	-0.66	0.14	-0.12	-0.02	0.39	-0.06	-0.47	-0.29	-0.36	0.1	-0.18	-0.53	-0.76	-0.09	-0.18	0	0.08	-0.09	-0.32	-0.02	0.33	0.03
AP1M2	-0.08	0	0.32	0.12	0.1	0.22	-0.13	0.27	0.09	-0.1	0.18	-0.34	-0.42	0.05	0	-0.08	0.02	-0.03	-0.46	0.08	-0.19	-0.24	-0.45	-0.07	-0.34	-0.3	-0.09	0.1	-0.23	-0.22	0.24	0.2	-0.34	-0.06	0.17	0.03	0.14	0.14	0.14	0.07	0.15	-0.09	0.11	-0.09	0.24	-0.31	-0.27	-0.11	-0.12
AP1S1	0.13	0.22	-0.18	0.03	-0.26	0.22	0.24	0.14	0.33	0.06	0.07	0.16	-0.25	0.06	0.12	0.48	0.09	0.04	-0.4	0.1	-0.73	-0.17	-0.16	0.1	-0.28	-0.26	0.19	-0.08	-0.02	-0.11	-0.14	-0.14	-0.09	0.11	-0.17	0.1	-0.06	-0.12	0.04	-0.21	0.2	-0.03	0.09	-0.06	-0.2	-0.42	-0.31	-0.62	-0.17
AP1S2	-0.03	0.295	0.505	0.365	-0.28	-0.635	0.31	0.42	-0.765	0.22	-0.255	-0.145	-0.245	-0.6	-0.14	-0.67	-0.915	-0.305	0.705	-0.015	1.465	-0.155	0.27	-0.43	1.135	0.15	0.465	1.9	0.325	0.455	0.365	0.715	0.95	0.5	0.09	0.29	0.24	0.495	-0.11	0.12	0.82	-0.695	-0.675	1.085	0.705	0.14	1.615	1.92	0.505
AP2A1	NA	0.38	NA	NA	NA	NA	NA	-0.14	-0.1	1.19	-0.01	-0.07	NA	0.34	NA	NA	-0.08	NA	NA	NA	NA	NA	NA	NA	NA	NA	NA	NA	NA	NA	NA	NA	NA	NA	0.39	NA	NA	0	0.28	0.6	-0.13	-0.03	-1.43	-0.7	NA	NA	NA	NA	NA
AP2A2	-0.14	0.12	0	0.13	0.02	0.1	-0.09	0.23	0.19	-0.16	0.08	0.18	0.24	0	0.21	0.05	0.06	0.1	-0.09	0.09	-0.38	0.3	0.15	0.14	-0.44	0.02	0.18	-0.66	-0.14	0.05	0.19	-0.35	-0.21	-0.25	-0.07	-0.05	-0.14	-0.04	0.01	-0.62	-0.23	-0.03	0.21	-0.08	-0.42	0.15	-0.1	-0.01	-0.21
AP2B1	0.03	-0.21	-0.17	0.21	-0.24	0.15	-0.32	0.34	0.04	-0.26	0.21	0.4	-0.34	-0.06	0.37	-0.55	-0.26	0.02	-0.23	0.26	-0.56	0.33	-0.32	0.29	-0.7	-0.22	0.19	-0.14	0.1	-0.13	0.15	0.44	0.35	-0.32	-0.46	-0.24	-0.11	0.5	-0.34	-0.41	0.08	-0.13	0.27	0.14	0.18	0.25	0.24	-0.19	-0.11
AP2M1	-1.22	0.16	-1.03	-0.08	-0.21	-0.14	0.33	0.23	0.26	0.43	0.13	0.11	-0.08	0.64	0.54	-0.82	0.25	0	0.15	0.45	0.27	0.27	0.46	0.51	0.06	-0.03	0.79	0.55	0.04	0.05	0.69	0.69	0.69	0.34	0.66	0.59	0.11	0.42	0.5	0.43	0.39	-0.07	-0.03	0.53	0.57	0.09	-0.3	1.06	NA
AP2S1	0.02	0.06	0.115	0.225	0.33	0.225	0.35	0.11	0.14	0.285	0.19	0.16	-0.255	0.27	0.135	-0.565	0.11	0.11	-0.24	0.31	-0.245	0.01	-0.055	0.325	-0.265	-0.27	0.235	0.35	-0.045	-0.015	0.52	0.275	0.045	0.15	-0.055	0.065	-0.175	0.225	0.255	-0.08	0.33	0.1	0.12	0.08	0.275	-0.17	0.2	-0.19	0.405
AP3B1	0.02	0.04	0.42	0.2	-0.61	0.06	0.15	0.22	-0.35	0.14	0.16	-0.14	-0.19	-0.34	-0.04	-0.1	-0.3	0.06	0.18	0.22	0.28	0.01	-0.47	0.46	0.01	0.22	0.23	0.36	0.29	0.05	0.06	0.24	0.12	0.18	-0.16	-0.02	0.08	0	-0.08	-0.21	0.05	0.12	0.13	0.13	0.13	-0.11	0.16	-0.05	-0.48
AP3B2	-0.36	-0.03	-0.05	-0.09	-0.28	-0.19	-0.15	-0.04	0.13	-0.12	-0.11	-0.21	-0.21	-0.07	-0.27	0.26	0.22	-0.08	-0.48	0.09	-0.38	0.07	-0.28	-0.1	-0.51	-0.26	-0.13	-0.41	-0.37	-0.15	-0.17	-0.38	-0.38	-0.27	0.09	-0.38	-0.15	-0.36	0.04	-0.3	0.24	-0.11	0.07	-0.39	-0.21	-0.23	-0.52	-0.8	-0.41
AP3D1	0.07	-0.28	0.03	-0.61	0.29	-0.37	-0.14	0.03	-0.82	-0.18	-0.39	-0.67	-0.13	-0.44	-0.34	0.25	-0.5	-0.48	-0.01	-0.42	0.05	-0.4	-0.31	-0.51	-0.18	-0.37	-0.25	-0.3	-0.13	-0.2	-0.2	-0.43	-0.42	-0.29	-0.36	-0.32	-0.14	-0.08	-0.54	-0.47	-0.16	-0.28	-0.5	-0.3	0.03	-0.01	-0.17	-0.21	-0.18
AP3M1	-0.23	0.28	0.03	NA	-0.56	-1.3	0.1	0.43	-0.05	-0.07	0.25	NA	-1.44	0.14	0.65	-1.31	0.1	-0.11	-0.35	0.93	-0.02	-0.32	-0.83	-0.85	-0.52	-0.37	0.18	0.37	0.07	0.17	0.78	NA	0.55	0.34	-0.4	-0.12	0.08	-0.27	0.08	0.5	0.28	-0.12	-0.21	0.3	NA	NA	NA	NA	NA
AP3M2	0.3	-0.28	-0.21	0.38	0.18	-0.46	0	0.07	0.11	0.03	-0.19	-0.03	-0.33	0.02	0.42	0.67	0	0.05	-0.24	0.08	-0.07	-0.3	-0.32	-0.39	-0.27	-0.14	0.05	0.04	0.01	-0.09	-0.65	-0.79	-0.31	-0.08	-0.08	-0.04	-0.17	-0.38	0	-0.08	-0.23	-0.18	0.61	0.11	-0.62	-0.28	-0.4	NA	0.46
AP3S1	-0.26	0.195	0.225	0.095	-0.13	-0.13	0.205	0.295	-0.395	0.015	0.175	0.18	-0.115	-0.145	0.02	-0.38	-0.295	-0.16	0.09	-0.015	0.31	0.025	-0.305	0.085	0.025	0.025	0.08	0.435	0.12	0.115	0.075	0.47	0.265	0.19	-0.075	0.025	0.155	0.53	-0.14	0.16	0.13	0.24	-0.14	0.175	0.355	0.22	0.495	-0.135	-0.05
AP3S2	-1.04	-0.26	0.39	0.02	-0.12	0.1	-0.33	-0.24	-0.34	-0.21	-0.03	-0.03	-0.63	-0.08	0.21	-0.44	-0.29	-0.29	-0.21	-0.25	0.04	-0.4	-0.43	-0.1	0.07	-0.13	-0.2	0.05	-0.17	-0.26	0.03	0.51	-0.39	-0.12	-0.09	-0.31	-0.09	-0.4	-0.24	-0.26	-0.17	-0.11	0	0.07	0.05	-0.22	-0.28	NA	-0.48
AP4B1	1.37	-0.05	0.33	-0.22	-0.66	-0.68	0.09	0	-0.41	0.07	0.16	-0.03	-0.4	-0.42	-0.44	0.05	-0.54	0.05	-0.23	0.12	0.44	-0.65	-0.38	-0.49	0	0	0.13	0.33	0.46	0.22	0.09	0.26	-0.34	0.09	-0.15	0.32	-0.1	-0.09	-0.17	-0.14	-0.23	0.26	0.26	0.31	0.67	-0.59	0.52	NA	NA
AP4E1	-0.085	-0.24	-0.01	-0.6	-0.27	-0.275	-0.395	-0.015	-0.36	-0.355	-0.195	-0.395	-0.215	-0.315	-0.335	0.275	-0.215	-0.39	-0.295	0.245	-0.32	-0.16	-0.225	-0.325	-0.425	-0.335	-0.455	-0.495	-0.365	-0.305	-0.205	-0.015	-0.45	-0.245	-0.525	-0.235	-0.43	-0.275	-0.41	-0.375	-0.075	-0.35	0.115	-0.405	0.025	-0.345	-0.475	-0.255	-0.06
AP4M1	0.13	-0.09	-0.07	0.01	0.09	-0.07	0.07	-0.01	0.32	0.06	0.09	0.08	-0.16	0.15	-0.34	0.08	0.18	-0.02	-0.31	-0.33	-0.05	-0.04	-0.1	-0.25	-0.18	-0.14	0.11	-0.02	-0.12	-0.09	-0.11	0.29	0	-0.12	0.05	-0.18	-0.08	0.04	0.28	0.05	0	0.01	0.01	0.24	-0.04	-0.45	-0.2	-0.73	-0.08
AP4S1	-0.385	-0.175	-0.28	-0.165	-0.425	-0.025	-0.41	0.135	-0.22	-0.06	-0.145	0.1	-0.05	0.055	-0.105	0.595	-0.1	-0.115	-0.23	-0.74	-0.32	-0.085	-0.145	-0.27	-0.45	-0.24	-0.14	-0.21	-0.07	0.08	-0.155	-0.21	-0.17	-0.34	-0.205	-0.155	-0.035	-0.085	-0.175	-0.12	-0.145	-0.065	-0.185	0.11	-0.175	-0.42	0.15	NA	-0.81
APAF1	0.37	0.07	-0.24	0.04	0.23	-0.12	0.45	0.08	-0.02	-0.05	0.31	-0.24	-0.43	0.22	0.06	0	-0.15	-0.17	-0.21	0.09	-0.28	-0.08	-0.22	-0.4	-0.3	-0.34	0.26	0.11	0.2	0.08	1.45	-0.53	-0.49	-0.01	-0.02	0.36	-0.04	-0.16	0.03	0.22	0	-0.07	0.06	0.28	-0.12	-0.06	0.11	-0.22	0.06
APBA1	0.39	-0.18	0.17	-0.25	-0.27	-0.05	-0.16	-0.2	0.03	-0.36	-0.03	0.06	-0.02	-0.12	-0.19	0	0.18	0.04	-0.52	0.38	-0.75	0.19	0.01	0.39	-0.73	-0.27	-0.17	-0.82	-0.45	-0.05	-0.17	-0.11	-0.34	-0.28	-0.18	-0.08	-0.2	-0.5	0.01	-0.67	0.1	-0.14	-0.14	-0.13	-0.66	-0.31	-0.27	-0.43	-0.25
APBA2	0.335	0.025	-0.015	0.13	0.155	0.25	0.105	0.24	0.28	-0.025	-0.02	0.145	0.06	0.235	0.12	-0.34	0.3	0.105	-0.125	-0.215	-0.12	-0.01	0.115	0.305	-0.07	-0.095	0.09	0.075	0.1	0.12	-0.185	-0.195	-0.225	0.03	0.06	0.135	-0.05	-0.02	0.21	-0.065	-0.44	0.015	0.3	0.035	0.265	-0.205	-0.13	-0.38	0.065
APBA2BP	0.015	0.0466667	0.08	0.0433333	0.0933333	0.126667	-0.18	-0.233333	0.22	0.0133333	0.2	0.283333	0.713333	0.116667	0.193333	-0.02	0.256667	0.14	0.0333333	0.366667	0.12	0.45	0.476667	0.583333	0.256667	0.175	-0.166667	-0.183333	0.12	-0.03	0.433333	0.33	0.396667	0.07	0.243333	-0.2	0.0933333	0.19	0.156667	-0.123333	-0.0933333	0.17	0.173333	0.015	0.06	0.18	-0.106667	0.365	-0.0133333
APBA3	0.05	-0.13	0.28	0.1	0.35	0.46	0.11	0.6	0.48	-0.08	0.07	0.19	0.08	0.44	0.32	-0.27	0.46	0.07	0.04	-0.02	-0.11	0.56	0.14	-0.03	-0.12	-0.08	0.3	0.14	0.25	0.14	0.2	0.74	0.15	0.03	0.23	0.17	-0.13	0.33	0.3	0.44	0.22	0.02	0.06	0.42	0.27	-0.11	0	0.45	-0.11
APBB1	-0.15	-0.05	0.1	-0.07	0.27	-0.03	-0.21	0.08	-0.33	-0.3	-0.33	-0.4	-0.04	-0.14	0.03	-0.73	-0.3	-0.29	-0.04	0.21	0.51	-0.05	-0.13	-0.14	0.32	0.05	-0.16	0.14	-0.07	-0.05	-0.09	0.23	0.26	-0.01	0.3	-0.21	-0.05	-0.08	-0.22	-0.04	0.07	-0.05	-0.12	0.01	0.49	-0.01	-0.27	0.39	-0.19
APBB1IP	0.26	0.07	-0.08	0.3	0.57	0.18	0.14	0.04	-0.34	0.07	0.22	0.06	0.02	0.37	0.57	0.67	-0.07	0.37	-0.01	-0.13	0.04	0.04	-0.27	0.29	-0.27	-0.54	0.31	0.05	0.07	0.26	0.12	-0.43	-0.55	-0.21	0.41	0.29	0.01	-0.31	0.11	-0.03	-0.45	-0.01	-0.32	0.11	-0.3	0.51	-0.55	NA	0.01
APBB2	0.19	0.05	0.35	-0.13	0.49	0.23	0.18	0.26	0.07	-0.11	0.08	-0.03	0.31	0.2	0.07	-0.46	0.07	0.01	0.33	0.52	0.56	0.08	0.31	0.07	0.51	0.56	0.07	0.22	-0.01	0.17	0.59	0.38	0.49	0.11	0.1	0	0.1	0.13	0.01	-0.17	0.29	0.08	0.38	0.13	0.78	0.19	0.16	0.01	-0.07
APBB3	0.31	-0.125	-0.025	0.175	0.02	0.12	0.03	0.005	0.27	-0.165	-0.01	-0.095	0.185	0.005	0.06	-0.055	0.075	0.015	-0.045	-0.2	0.045	-0.075	-0.015	0.045	0.035	0.085	0.005	-0.085	-0.13	-0.02	0.23	-0.105	0.025	0.055	0.2	-0.005	-0.14	-0.115	0.095	0.03	-0.09	0.02	0.135	-0.09	0.115	0.065	-0.085	-0.16	-0.085
APC	NA	0.12	0.72	0.38	0.09	0	0.02	-0.15	-0.26	-0.05	-0.18	0.03	0.18	0.1	-0.01	-0.47	-0.23	-0.04	0.32	0.11	0.87	0.1	-0.05	-0.06	1.1	0.51	-0.09	0.29	0.05	-0.03	0.68	0.74	0.44	0.42	0.11	0	0.25	0.27	0.15	-0.07	0.07	0.29	-0.07	0.24	0.81	0.56	0.28	0.81	0.19
APC2	1.53	0.15	-0.27	-0.07	0.04	-0.14	-0.09	-0.13	0.3	0.08	-0.06	-0.06	0.16	-0.27	-0.16	0.28	0.08	0.11	0.11	0.29	0.1	0.02	0.2	0.2	0.12	-0.05	-0.13	-0.01	0.34	0.11	-0.14	-0.01	0.18	0.13	0.08	0.01	0.22	0.03	-0.17	-0.34	0.19	0.13	0.32	-0.01	-0.4	-0.14	-0.12	-0.18	-0.11
APCS	0.055	-0.475	-0.23	-0.335	-0.29	-0.25	-0.305	-0.105	-0.255	-0.15	-0.37	-0.275	-0.1	-0.425	-0.305	0.04	-0.34	-0.41	-0.17	0.1	-0.015	-0.2	0.135	0.08	-0.29	-0.15	-0.48	-0.365	-0.115	-0.285	-0.185	-0.195	-0.21	-0.42	-0.475	-0.345	-0.345	-0.185	-0.515	-0.62	-0.265	-0.35	-0.29	-0.23	-0.31	-0.225	-0.335	-0.14	-0.29
APEH	-0.39	-0.09	0.2	-0.22	0.25	-0.39	0.11	-0.11	-0.23	0.05	-0.12	-0.5	-0.36	-0.13	-0.14	-0.24	-0.16	-0.26	-0.24	0.58	-0.1	-0.05	-0.23	-0.21	-0.19	-0.06	-0.07	-0.13	-0.08	-0.28	-0.11	0.27	-0.2	-0.26	-0.15	0.04	-0.17	-0.02	-0.16	-0.03	0.45	-0.18	0	-0.23	0.02	-0.29	-0.06	-0.49	-0.12
APEX1	0.09	-0.17	-0.34	-0.11	0.16	0.18	-0.21	0.01	-0.24	-0.09	0.01	0.07	-0.3	-0.25	-0.09	0	-0.59	-0.22	-0.07	-0.13	0.16	-0.28	-0.36	-0.22	-0.04	-0.13	0.09	0.09	0.17	-0.08	-0.19	0.35	-0.02	-0.01	-0.42	0.12	-0.21	0.08	-0.12	-0.16	-0.03	-0.16	-0.21	0.07	0.23	-0.12	0.18	0.08	0.04
APEX2	0.12	0.08	-0.08	0.59	0.08	0.15	0.1	0.02	0.12	0.02	-0.02	-0.08	-0.08	0.26	-0.16	0.27	-0.04	-0.13	-0.76	-0.17	-0.13	0.33	-0.3	0.25	-0.17	-0.31	0.36	0.19	0.18	-0.06	-0.39	-0.58	0.12	0.09	NA	0.32	-0.18	0.22	0.24	0.29	0.45	-0.08	-0.05	0.06	0.61	-0.14	0.22	NA	-0.05
APH1A	-0.21	-0.07	0.38	0.1	0.08	-0.16	0.31	0.05	-0.06	0.29	0.08	-0.09	-0.54	0.12	0.38	-0.04	-0.23	-0.17	-0.13	-0.23	-0.09	-0.3	-0.6	-0.29	0.03	-0.31	0.14	0.53	-0.1	0.04	0.14	-0.01	-0.01	0.05	0.25	0.12	-0.12	0.3	0.22	0.37	0.21	0.09	-0.16	0.09	0.06	-0.13	-0.44	NA	0.24
APH1B	-0.04	-0.3	-0.66	-0.21	-0.24	0.33	-0.35	-0.13	-0.53	-0.01	-0.13	-0.17	0.16	-0.17	0.19	0.13	-0.39	-0.37	0.3	0.17	NA	-0.47	-0.01	-0.6	NA	NA	-0.25	0.06	-0.13	-0.1	-0.56	-0.37	-0.15	-0.12	-0.39	0.08	-0.13	-0.35	-0.23	-0.24	-0.53	-0.1	-0.03	0.01	-0.51	-0.28	0.06	0.56	0.62
API5	0	-0.12	0.33	0.02	0.44	-0.33	0.31	-0.07	0.2	0.11	0.19	0.08	-0.17	0.16	-0.66	0.02	0.34	0.03	-0.2	0.14	-0.26	0	0	0.62	-0.32	0.09	0.44	0.07	-0.07	0.17	-0.38	0.01	-0.4	0.22	-0.07	0.17	-0.35	0.53	0.21	0.08	0.24	-0.01	0.52	0.14	-0.43	-0.48	NA	NA	0.21
APIP	0.35	-0.08	0.31	0.18	0.08	0.03	0.11	0.35	0.24	0.29	0.09	0.06	-0.63	0.08	-0.33	-0.34	0.07	-0.13	-0.44	0.66	-0.25	0.18	-0.14	0.55	-0.19	-0.34	0.3	0.21	0.14	0.05	-0.02	0.37	0.49	0.21	-0.12	0.02	-0.08	0.1	-0.02	-0.05	-0.38	-0.03	0.48	0.46	-0.28	-0.16	-0.06	0.54	0.08
APLN	0.16	-0.273333	0.0366667	-0.24	0.25	-0.163333	-0.293333	-0.2	-0.203333	-0.22	-0.24	-0.24	-0.126667	-0.246667	-0.2	0.09	-0.213333	-0.326667	-0.28	-0.263333	-0.353333	-0.01	-0.14	-0.18	-0.3	-0.28	-0.253333	-0.293333	-0.353333	-0.313333	0.12	-0.316667	-0.0633333	-0.33	-0.486667	-0.203333	-0.386667	-0.176667	-0.323333	-0.456667	-0.16	-0.316667	-0.253333	-0.336667	-0.0766667	-0.293333	-0.34	-0.176667	-0.376667
APLP1	NA	-0.23	-0.63	-0.3	-0.08	0.31	-0.72	0.04	0.34	0.24	0.13	0.18	-0.19	0.19	0.46	-0.39	0.2	-0.05	-0.12	-0.76	-0.01	0.07	NA	0.49	0.02	-0.64	0.28	0.41	-0.05	-0.02	0.02	0.34	0.02	0.1	0.18	0.38	-0.11	0.14	0.42	0.33	-0.38	0.16	0.48	0.03	1.13	-0.18	NA	NA	-0.52
APLP2	-0.47	-0.12	-0.27	0.14	-0.37	-0.25	0.04	0.14	-0.53	-0.02	0.1	-0.17	-0.32	-0.38	-0.21	-0.35	-0.51	-0.1	-0.19	0.08	-0.04	-0.37	-0.41	-0.1	-0.11	-0.2	0.2	0.68	-0.1	-0.02	0.53	-0.19	0.09	0.47	0.04	-0.11	-0.16	0.49	0.01	-0.05	0.03	0.15	0.19	0.05	0.27	0.03	-0.24	0	0.2
APOA1	0.91	0.38	0.63	0.28	-0.44	0.66	0.11	0.37	0.73	0.33	0.26	0.63	0.07	0.4	0.4	-0.14	0.83	0.65	-0.07	0.75	-0.63	0.23	-0.26	1.06	-0.6	-0.02	0.23	-0.18	0.23	0.46	0.21	0.3	0.48	0.31	0.49	0.07	0.31	0.13	0.43	0.05	0.34	0.36	0.67	0.03	-0.35	-0.1	-0.43	-0.28	0.08
APOA1BP	0.08	-0.05	0.27	-0.18	0.09	0.02	0.11	-0.11	0.02	0.12	0.08	-0.04	0.07	0.05	-0.03	-0.21	-0.14	0.05	0.03	-0.36	0.29	0.05	-0.03	0.21	0.23	0.11	-0.02	0.02	0.07	0.02	-0.05	-0.06	0.37	0	0.12	0.13	-0.04	0.24	0.23	0.43	0.28	0.06	-0.11	-0.2	0.09	0.28	0.23	0.02	0.07
APOA2	-0.095	0.02	-0.04	0.055	0.545	0.265	0.05	0.265	0.125	-0.19	0.03	0.01	0.47	-0.055	0.155	-0.16	0.145	0.05	0.055	0.04	0.18	0.18	0.255	0.25	0.26	0.19	-0.115	0.005	0	-0.105	0.41	0.1	0.145	-0.095	-0.11	-0.225	-0.055	0.245	0.315	-0.075	-0.175	-0.175	-0.25	0.27	0.44	-0.22	0.65	0.12	0.135
APOA4	1.06	-0.86	0.21	-0.2	-0.87	-0.24	-0.87	-0.18	-0.79	-0.72	-0.59	-0.47	-0.31	-0.59	-0.03	0.26	-0.55	-0.87	-0.33	0.3	-0.45	-0.19	-0.31	0.35	-0.46	-0.65	-0.4	-0.27	-0.39	-0.49	-0.25	-0.03	0.16	-0.29	-1.22	-0.32	-0.2	-0.08	-0.65	-0.46	0.11	-0.71	0.27	-0.14	-0.09	-0.5	-0.67	-0.78	-0.33
APOA5	-0.37	-0.06	0.03	0.06	-0.14	0.28	-0.02	-0.06	0.07	-0.16	-0.05	0.03	0.24	-0.03	0.29	0.57	0.07	0.01	-0.06	-0.19	0.09	-0.03	0.16	-0.06	0	-0.03	-0.09	-0.14	0.01	-0.01	0.24	-0.56	-0.03	-0.07	0.27	-0.07	-0.03	-0.18	0.06	-0.3	0.16	0.09	-0.25	-0.05	-0.17	0.38	-0.72	-0.08	0.13
APOB	-0.1	0.24	-0.05	-0.2	0.22	-0.01	0.42	0.29	-0.07	0.17	0.07	-0.17	-0.47	-0.03	0	-0.13	-0.1	0.09	0.56	-0.38	0.28	-0.45	-0.1	-0.63	0.01	-0.05	0.16	0.37	-0.01	0.14	-0.18	-0.18	0.4	0.19	0	0.09	-0.11	0.46	0.03	0.08	-0.46	0.12	-0.11	0.07	-0.32	0.52	-0.26	0.02	0.21
APOBEC1	-0.36	0.06	NA	0.38	-0.14	0.23	0.26	0.11	0.32	-0.05	0.08	0.03	-0.93	0.24	0.26	-0.46	-0.1	0.15	-0.17	0.38	-0.28	-0.01	-0.37	0	-0.23	-0.39	0.1	0.32	-0.09	0.03	-0.79	0.08	0.45	0.12	0.23	0.4	-0.23	0.46	-0.05	0.15	0.47	0.1	-0.41	NA	-0.15	0.24	0.55	NA	-0.33
APOBEC2	-0.36	-0.11	0.06	0.05	-0.08	0.18	-0.12	0.18	0.59	-0.2	-0.04	-0.1	0.02	0.11	-0.02	0.07	0.49	0	-0.41	0.23	-0.56	0.12	-0.16	0.25	-0.46	-0.22	-0.12	-0.56	-0.34	-0.25	-0.24	-0.18	-0.32	-0.37	0.3	-0.35	-0.29	-0.45	0.31	-0.34	-0.3	-0.18	-0.17	-0.42	-0.4	0.68	-0.2	-0.25	0.42
APOBEC3B	0.255	-0.39	0.265	-0.635	0.075	-0.6	-0.445	-0.39	-0.585	-0.275	-0.35	-0.4	0.115	-0.575	-0.235	-0.325	-0.49	-0.485	-0.225	-0.095	-0.175	0.565	-0.155	-0.105	-0.26	-0.315	-0.745	-0.3	-0.52	-0.375	0.18	-0.055	0.035	-0.24	-0.745	-0.415	-0.405	-0.535	-0.555	-0.73	0.005	-0.355	0.09	-0.145	0.35	0.01	0.25	0.235	-0.11
APOBEC3C	0.06	0.015	-0.245	0.05	0.07	0.14	-0.04	-0.08	0.145	-0.165	-0.07	-0.205	-0.01	0.04	0.005	0.53	0.14	-0.01	-0.21	0.005	-0.395	-0.05	0.01	0.11	-0.345	-0.32	-0.075	-0.415	-0.16	-0.135	-0.11	-0.24	-0.36	-0.13	0.035	-0.11	-0.195	-0.375	0.07	-0.115	-0.02	-0.125	0.135	-0.275	-0.39	-0.24	-0.235	-0.155	-0.16
APOBEC3D	-0.14	0.09	-0.13	0.05	0.71	0.06	0.05	-0.09	0.12	-0.09	0.27	0.05	0.3	0.04	0.23	-0.63	0.06	0.16	0.04	0.35	-0.04	0.18	0.35	-0.13	0	0.23	-0.04	-0.34	-0.09	0.02	0.43	0.14	0.27	-0.06	-0.09	0.23	-0.03	0.16	0.01	-0.32	0.09	-0.03	0.06	-0.05	0.01	0.09	0.19	0.46	0.17
APOBEC3F	0.23	-0.13	-0.01	-0.03	-0.3	-0.26	0.04	-0.04	-0.41	0.18	-0.11	-0.21	0.02	-0.23	-0.12	0.47	-0.3	-0.03	0.11	-0.54	0.1	-0.4	-0.06	-0.27	0.23	-0.06	-0.03	0.39	0.08	0.09	0	-0.58	-0.39	-0.13	-0.11	0.24	-0.23	-0.24	-0.22	-0.16	0.18	0.04	-0.04	0.14	0.17	0	0.2	-0.87	-0.04
APOBEC3G	-0.06	0.15	0.68	-0.18	-0.2	-0.6	0.42	-0.15	-0.53	0.72	-0.22	-0.3	-0.46	-0.24	-0.12	-0.24	-0.27	-0.09	-0.27	0.39	0.24	-0.16	-0.22	-0.23	-0.09	-0.18	0.58	0.61	0.33	0.44	-0.49	-0.05	-0.33	-0.06	-0.06	0.26	0.26	0	0.31	-0.18	0.12	0.11	-0.23	0.54	0.06	0.2	0.48	-1.16	0.48
APOC1	-0.25	-0.09	0.03	0.06	0.11	0.02	-0.03	-0.12	-0.12	-0.09	-0.18	-0.07	0.02	-0.19	0	-0.04	-0.13	-0.09	-0.05	-0.23	-0.14	0.08	-0.12	-0.27	0.24	0.01	-0.08	-0.3	-0.08	-0.02	-0.08	-0.11	-0.19	-0.05	-0.22	0.16	-0.09	0.1	0.02	-0.25	0.11	-0.05	0.25	-0.06	-0.04	0	-0.05	0.21	-0.16
APOC2	0.28	0.18	0.3	0.26	-0.56	-0.05	0.04	0.32	0.2	0.04	0.14	0.2	NA	-0.11	-0.27	0.33	-0.02	-0.08	0	-0.83	0.3	-0.52	NA	-0.49	0.38	0.07	-0.08	0.31	-0.46	0.17	-0.4	-0.45	-0.6	0.12	0.01	0.35	0.27	-0.42	-0.18	-0.07	-0.71	0.16	0.29	0	NA	0.75	NA	NA	NA
APOC3	0.26	-0.04	0.46	-0.1	-0.13	0.47	0.03	0.19	0.72	-0.29	0.19	0.45	0.58	0.51	-0.11	-0.03	0.7	0.34	-0.51	0.47	-0.39	0.62	0.38	0.62	-0.63	0.34	0.06	-0.71	-0.4	0.02	0.61	0.48	0.2	-0.07	0.46	-0.32	-0.1	-0.39	0.46	-0.51	0.32	0.11	0.15	0.13	-0.3	0.33	0.08	0.33	0.69
APOC4	-0.08	-0.08	-0.09	-0.17	0.02	0.04	0.19	-0.11	-0.12	0.1	-0.04	-0.27	-0.4	-0.12	-0.01	0.46	-0.3	-0.07	-0.06	-0.42	-0.26	-0.57	-0.29	-0.35	0.01	-0.08	-0.02	0.09	-0.31	-0.21	-0.44	-0.34	-0.4	-0.08	-0.07	-0.06	-0.18	-0.03	-0.02	-0.01	-0.55	0.01	-0.24	-0.34	-0.18	0.1	-0.15	-0.52	-0.27
APOD	-0.15	-0.08	0.58	-0.01	0.32	0.02	0.2	0.16	-0.12	NA	-0.21	0.14	-0.14	-0.09	0.3	-0.38	0.13	0.04	-0.25	0.04	0.04	-0.07	-0.23	0.21	0.08	0.24	0.07	0.21	-0.06	0.15	-0.14	0.82	0.5	0.11	0.14	-0.02	-0.07	0.09	0.19	0.22	-0.3	0.14	-0.24	0.07	0.45	0.67	0.02	0.75	0.05
APOE	0.11	-0.04	-0.05	0.01	-0.49	0.18	0.14	0.25	0.14	0.12	0.23	0.13	-0.31	0.11	0.29	0.4	0.15	0	-0.09	-0.68	-0.59	0.04	-0.18	-0.16	-0.23	-0.03	0.09	-0.31	0.05	-0.05	-0.07	0.05	-0.5	-0.15	-0.15	-0.1	-0.06	0.01	0.13	-0.16	-0.6	0.07	-0.13	0	-0.19	0.6	-0.21	-0.08	0.48
APOF	0.12	0.09	0.04	0.09	0.53	0.05	0.28	0.16	0.35	0.19	0.29	-0.07	-0.18	0.28	0.02	0.17	0.44	0.04	-0.08	0.07	-0.41	0.27	-0.15	-0.18	-0.38	-0.3	0.04	-0.03	0.05	-0.06	-0.45	-0.13	-0.39	-0.05	0.12	-0.14	0.35	0.12	0.34	0.3	0.08	0.05	0.17	0.19	0.01	-0.15	-0.16	-0.38	-0.55
APOH	NA	-0.08	NA	0.34	0.51	0.19	-0.02	1.1	-0.76	0.06	0.02	-0.39	-0.13	0.26	NA	-1.51	-0.04	NA	-0.43	NA	-0.3	NA	0.24	0.64	0.59	NA	-0.1	0.53	0.08	0.01	1.8	0.01	-0.57	-0.32	-0.01	0.37	0.07	0.67	0.47	0.14	NA	0.41	0.91	-0.01	NA	NA	NA	NA	NA
APOL1	-0.1	-0.16	0.02	0.23	-0.5	0.16	-0.31	0.2	-0.07	-0.13	0.06	0.1	-0.07	-0.21	-0.07	-0.19	-0.09	-0.16	-0.14	0.14	-0.53	-0.01	-0.28	0.46	-0.42	-0.23	-0.02	-0.23	0.19	-0.14	-0.15	0.13	0.35	-0.18	-0.38	-0.15	-0.1	0.13	-0.22	-0.37	-0.18	-0.17	0.22	-0.11	-0.09	0.13	-0.16	0.09	0.08
APOL2	-0.12	0.05	0.11	-0.16	-0.05	-0.225	-0.105	0.035	0.13	0.04	-0.06	-0.125	0.09	0.01	-0.03	-0.115	-0.02	-0.09	-0.14	0.145	-0.115	-0.03	0.375	-0.09	-0.08	-0.135	-0.175	-0.135	-0.01	-0.09	0	0.08	-0.185	-0.05	0.1	-0.06	-0.005	-0.29	0.04	-0.04	-0.13	-0.135	0.215	-0.215	-0.08	0.21	-0.055	0.01	-0.05
APOL3	0.16	-0.56	0.02	-0.24	-0.51	0.08	-0.62	-0.08	-0.3	-0.59	-0.44	-0.44	0.11	-0.63	-0.28	0.21	-0.47	-0.51	-0.53	-0.21	-0.75	-0.12	-0.09	-0.26	-0.82	-0.42	-0.43	-1.05	-0.49	-0.56	-0.03	-0.15	-0.23	-0.57	-0.97	-0.5	-0.48	-0.32	-0.92	-1.1	-0.36	-0.59	-0.06	-0.52	-0.15	-0.67	-0.49	-0.04	-0.06
APOL4	0.075	-0.015	0.01	0.605	0.02	0.155	0.015	0.06	-0.18	0.005	-0.07	-0.035	-0.105	-0.07	0.125	0.25	-0.06	-0.175	0.125	-0.455	0.03	-0.15	-0.01	-0.28	-0.025	-0.045	0.075	0.125	-0.065	-0.06	-0.18	-0.205	-0.14	0.01	-0.07	-0.095	-0.315	0.04	-0.185	-0.235	-0.025	-0.2	-0.26	-0.24	0.08	0.135	0.09	0.075	-0.09
APOL5	0.06	-0.15	-0.02	-0.05	0.04	0.03	-0.22	0.05	0.28	-0.17	-0.12	-0.15	0.03	-0.29	-0.09	0.44	0.23	0	-0.34	-0.24	-0.56	0.01	0.01	0	-0.57	-0.3	-0.33	-0.58	-0.27	-0.17	0.1	-0.49	-0.41	-0.26	-0.15	-0.18	-0.19	-0.44	-0.19	-0.37	-0.41	-0.28	-0.2	-0.48	-0.46	-0.57	-0.3	-0.45	-0.36
APOL6	0.23	0.09	0.29	0.25	-0.19	0.27	0.13	0.21	-0.04	0.23	0.02	0.31	-0.45	-0.01	0.18	-0.06	0.16	-0.04	-0.41	0.05	-0.36	0.14	-0.34	0	-0.66	-0.34	0.05	-0.14	-0.13	0.02	0.02	0.34	0.43	-0.15	0	0.32	-0.23	0.2	0.23	0.16	-0.04	0.07	0.11	-0.04	-0.13	0.02	-0.3	0.15	0.2
APOLD1	-0.07	-0.41	-0.08	-0.37	0.2	-0.33	-0.07	-0.1	-0.03	-0.17	-0.12	-0.33	-0.06	-0.09	-0.32	-0.43	-0.03	-0.32	-0.29	0.79	-0.45	0.08	0.06	-0.29	-0.53	-0.34	-0.11	-0.17	-0.33	-0.35	-0.43	-0.07	-0.06	-0.08	-0.15	-0.3	-0.62	-0.15	-0.13	-0.12	-0.09	-0.32	-0.24	-0.21	-0.4	-0.09	-0.32	0.16	0.06
APOM	0.145	0.025	0	-0.04	0.13	-0.085	0	0.22	0.105	0.135	-0.13	-0.155	0.09	-0.14	-0.115	0.655	0.02	-0.26	-0.14	-0.31	-0.075	-0.075	-0.13	0.06	-0.055	-0.07	-0.155	-0.12	-0.085	-0.12	-0.325	-0.38	-0.535	-0.305	0.055	-0.12	0.075	-0.085	0.14	0.175	0.325	-0.035	-0.355	-0.05	-0.135	-0.4	0.08	0.21	0.36
APOO	0.03	-0.11	0.12	-0.03	-0.11	-0.1	-0.19	0.07	-0.38	-0.05	-0.1	-0.19	-0.65	-0.15	-0.21	-0.14	-0.11	-0.25	-0.2	0.4	-0.54	-0.23	-0.63	0.32	-0.4	-0.29	0.08	0.03	0	-0.03	-0.15	0.11	0.16	-0.15	-0.2	-0.18	0.17	0.12	0.07	-0.08	0.28	-0.28	0.43	-0.06	0.08	-0.04	0.05	-0.46	-0.14
APP	0.29	0.18	0.04	0.085	0.365	0.08	0.28	0.685	-0.17	0.235	0.045	-0.145	0.19	0	0.015	-0.72	-0.38	0.115	0.145	0.18	0.06	0.275	0.105	-0.265	0.24	0.25	0.07	0.21	0.025	-0.1	-0.195	0.07	0.455	-0.045	-0.165	0.245	-0.165	0.44	-0.18	-0.15	0.03	0.115	-0.705	0.08	0.11	-0.16	0.065	0.06	-0.005
APPBP1	-0.18	0.04	0.13	0.13	-0.3	-0.12	0.26	0.02	-0.57	0.21	-0.18	-0.58	-0.86	-0.32	0.06	0.28	-0.86	-0.21	-0.15	0.07	0.03	-0.36	-0.26	-0.17	-0.21	-0.34	-0.04	0.21	-0.17	-0.36	-0.23	-0.21	0.01	-0.05	-0.68	0.09	-0.29	0.58	-0.51	-0.35	-0.06	-0.09	0.25	0.15	0.07	-0.51	-0.47	-0.64	-0.04
APPBP2	-0.23	0.01	0.13	-0.01	0.02	0.28	0.04	0	0.31	-0.01	0.02	-0.06	-0.38	0.11	0.1	-0.15	0.08	0.21	-0.33	-0.07	-0.46	0.14	-0.4	0.13	-0.36	-0.41	0.17	0.04	0.05	-0.09	0.11	0.39	0	-0.05	0.34	-0.03	-0.09	0.27	0.38	0.26	-0.06	0.01	0.14	-0.05	0.05	-0.26	-0.97	NA	0.01
APPL1	-0.38	0.01	0.02	0.02	-0.66	0.12	-0.25	-0.02	0.01	-0.18	0.01	0.06	0.11	-0.18	0.14	0.05	-0.17	0	-0.14	0.01	-0.15	-0.03	0.02	0.23	-0.17	-0.07	-0.24	-0.38	-0.09	0.08	-0.16	-0.29	-0.25	0.07	-0.26	0.04	-0.05	-0.14	-0.19	-0.3	-0.34	-0.01	-0.02	0.08	-0.1	-0.35	0.28	-1.36	-0.65
APPL2	-1.42	0	-1.37	0.09	0.05	-1.41	0.17	-0.39	-0.31	0	-0.21	-0.35	-0.65	-0.4	-0.67	0.64	0.02	-0.23	0.14	-0.47	0.15	0.06	0	0.48	-0.29	0.1	0.01	0.06	-0.1	0.3	0.18	0.23	0	0.47	-0.43	0.91	-0.1	0.11	-0.09	0.26	-0.03	-0.16	NA	-0.06	0.13	-0.71	NA	NA	NA
APRIN	0.71	0.2	NA	0.36	0.74	0.01	0.23	0.57	0.27	NA	-0.03	0.39	-0.01	0.13	0.61	0.45	0.23	0.19	0.07	0.54	0.02	-0.09	-0.49	-0.68	-0.23	0.16	0.2	0.22	-0.06	0.16	0.65	0.93	0.72	-0.05	0.05	-1.23	0.07	0.24	0.16	-0.23	0.3	0.28	1.48	0.43	0.88	0.26	0.79	NA	0.31
APRT	0.2	-0.05	0.19	0.01	0.14	-0.18	0.16	-0.27	-0.2	0.15	-0.16	-0.21	-0.33	-0.03	-0.4	0.13	0.01	-0.19	-0.12	-0.37	-0.24	-0.24	-0.43	-0.06	-0.26	-0.2	-0.35	-0.03	-0.31	-0.02	0	-0.5	-0.12	0.04	-0.1	0.07	-0.02	-0.14	0.09	-0.07	-0.24	-0.1	-0.21	-0.14	-0.02	-0.04	0.27	-0.42	-0.44
APTX	0.22	-0.05	-0.45	-0.16	-0.18	0.15	0.05	0.03	0.18	-0.1	0.11	0.09	0.14	-0.07	-0.05	0.3	0.03	0.06	-0.16	0.14	0.01	-0.12	-0.05	0.09	0.15	0.19	0.07	0.13	-0.06	0	0.2	0.63	0.03	0.08	0.05	0.03	-0.56	0.44	-0.16	-0.45	-0.13	0.03	-0.06	0.02	-0.13	0.28	0.07	NA	0.61
AQP1	0.75	-0.01	-0.02	0.12	0.19	0.13	0.11	0.23	0.11	0.07	0.15	0.18	0.08	-0.11	0.36	-0.09	0.02	-0.04	0.26	0.64	-0.15	-0.11	0.1	0.37	0.22	0.12	-0.04	0.13	0.29	-0.07	-0.03	0.34	0.17	-0.05	-0.02	-0.08	0.17	0.05	-0.2	-0.25	-0.3	0.01	-0.32	0.34	-0.2	0.04	-0.19	0.18	0.33
AQP2	-0.02	-0.54	-0.03	-0.27	0.02	-0.3	-0.52	-0.22	-0.25	-0.61	-0.41	-0.82	-0.57	-0.38	-0.29	0.48	-0.28	-0.73	-0.94	-0.11	-1.21	0.11	-0.41	-0.07	-1.21	-0.85	-0.71	-1.39	-0.91	-0.83	-0.42	-0.54	-0.5	-0.86	-0.96	-0.5	-0.81	-0.43	-0.62	-0.88	-0.23	-0.91	0.47	-0.68	-0.77	-0.57	-0.6	-0.54	-0.18
AQP3	-0.11	-0.21	-0.06	0.01	-1.01	0.09	-0.62	-0.08	-0.08	-0.37	-0.05	0.29	-0.35	-0.11	0.21	0.09	-0.03	-0.18	-0.29	-0.08	-0.77	-0.43	-0.24	0.16	-0.83	0.08	0.52	-1.08	0.15	-0.07	-0.01	0.14	-0.38	-0.42	-0.46	-0.57	-0.07	-0.19	-0.46	-0.92	-0.57	-0.3	-0.11	0.27	-0.28	-0.67	-1.62	-0.08	-0.36
AQP4	0.77	-0.19	0.02	0.07	0.19	0.18	0.15	0.14	0.05	0.03	-0.06	0.04	-0.35	0.01	0.16	-0.22	0.31	0.01	-0.25	-0.35	-0.5	0.62	-0.33	0	-0.55	-0.28	0.1	-0.09	-0.1	-0.23	0.91	0.16	0.03	0.08	-0.26	-0.1	-0.45	0.19	0.15	-0.06	0.33	0.14	0.17	0.02	0.39	-0.21	-0.13	-0.35	0.06
AQP5	0.82	-0.26	-0.01	-0.06	-0.78	-0.27	-0.4	-0.23	0.06	-0.29	-0.4	-0.26	0.1	-0.21	-0.25	0.18	-0.07	-0.07	-0.35	-0.15	-0.34	-0.06	-0.02	0.14	-0.48	-0.25	-0.18	-0.2	-0.05	-0.13	0.06	-0.42	-0.27	-0.06	0	-0.02	-0.09	-0.23	-0.27	-0.2	-0.2	0.04	0.06	-0.13	-0.44	-0.37	-0.32	-0.18	-0.04
AQP6	0.495	-0.435	-0.045	-0.19	0.1	0	-0.425	-0.155	0.025	-0.42	-0.595	-0.405	0.01	-0.43	-0.135	0.605	-0.165	-0.165	-0.515	0.11	-0.67	0	-0.07	0.19	-0.745	-0.265	-0.505	-0.89	-0.5	-0.435	0.075	-0.22	-0.05	-0.495	-0.315	-0.485	-0.455	-0.625	-0.51	-0.77	-0.33	-0.785	0.12	-0.39	-0.59	-0.685	-0.495	0.27	-0.23
AQP7	0.265	-0.32	-0.075	-0.075	-0.01	0.14	-0.225	-0.125	0.16	-0.08	-0.065	-0.29	-0.39	-0.155	-0.01	0.405	0.175	-0.11	-0.615	-0.085	-0.74	0	-0.31	0.405	-0.755	-0.575	-0.195	-0.535	-0.29	-0.275	-0.105	-0.215	-0.335	-0.42	-0.03	-0.325	-0.275	-0.17	-0.225	-0.335	-0.155	-0.33	0.175	-0.26	-0.475	-0.585	-0.235	0.015	-0.1
AQP8	-0.13	0.12	-0.07	0.22	-0.08	0.28	-0.09	-0.08	-0.07	0.08	0.03	-0.2	-0.12	0.06	0.27	-0.27	-0.08	-0.16	-0.26	-0.38	-0.19	0.45	-0.03	0.37	-0.25	0.05	0.09	-0.16	-0.17	-0.09	0.49	-0.29	-0.09	0.09	0.17	0.1	-0.23	0.24	0.03	-0.17	-0.24	0.08	0.21	0.09	0.32	-0.27	0.24	0.36	0.28
AQP9	-0.44	-0.07	-0.3	-0.39	0.79	-0.06	0.32	0.24	-0.17	NA	0.02	0.26	-0.54	0.06	0.59	-0.68	0.08	-0.22	0.13	0.08	-0.22	-0.27	-0.43	-0.11	-0.18	-0.19	0.18	0.76	-0.06	0.33	0.59	0.47	0.86	0.41	0.5	0.24	-0.46	0.57	-0.2	-0.04	0.26	0.13	-0.38	0.08	0.63	0.36	0.35	NA	0.33
AQR	NA	-0.05	NA	-0.64	0.77	0	0.36	0.52	-0.54	-0.48	-0.39	-0.13	0.28	0.09	0.52	-1.25	-0.7	-0.29	0	0.21	0.06	0.34	0.31	NA	0.15	0.24	-0.05	-0.1	-0.15	-0.24	0.31	NA	1.23	0.03	-0.45	NA	0.08	-0.7	-0.82	-0.1	1.05	-0.55	0	0.02	NA	NA	2.4	NA	NA
AR	0.13	-0.565	-0.39	0.115	-0.235	-0.225	-0.405	-0.055	-0.185	-0.34	-0.405	-0.4	-0.22	-0.245	-0.045	0.1	-0.255	-0.285	-0.475	-0.575	-0.51	-0.01	-0.36	-0.28	-0.43	-0.46	-0.27	-0.355	-0.25	-0.235	-0.215	-0.165	-0.28	-0.36	-0.17	-0.405	-0.5	-0.05	-0.33	-0.325	-0.28	-0.245	-0.235	-0.26	-0.285	-0.33	0.235	0.13	-0.165
ARAF	-0.08	-0.23	-0.13	0.35	0.11	0.29	0.11	-0.07	0.08	-0.09	0.06	-0.02	-0.04	0.07	-0.02	0.3	0.07	-0.01	-0.03	0.1	NA	-0.16	-0.31	0.18	NA	NA	0.14	0.29	-0.11	-0.12	-0.37	-0.31	-0.36	0.13	0	0.11	-0.14	-0.26	0.04	-0.08	-0.21	-0.19	0.56	-0.16	-0.16	-0.1	0.28	-0.35	0.64
ARC	-0.72	0.05	-0.5	-0.34	0.02	-0.55	-0.04	-0.3	0.05	0.07	-0.19	-0.03	-0.2	-0.03	-0.37	0.87	0.03	-0.05	0.01	-0.11	0.03	-0.29	0.19	-0.23	-0.25	0.17	-0.04	-0.15	0.01	-0.11	-0.84	-0.96	-0.54	-0.05	0	0.05	0.04	-0.6	0.06	-0.17	-0.68	-0.12	NA	0.03	-0.81	-0.13	0.01	-0.27	0.47
ARCN1	NA	0.36	NA	NA	-0.8	0.33	0.05	0.79	0.36	0.49	0.14	-0.15	-0.56	0.01	1.26	-0.08	0.22	0.41	-0.27	NA	NA	-0.13	-0.12	0.96	0.19	0.14	-0.03	0.51	0.01	0.15	0.21	-0.01	-0.58	0.62	0.36	-0.48	0.58	0.79	0.48	0.68	NA	-0.24	NA	-0.58	NA	1.74	NA	NA	0.87
ARD1A	0.41	0.13	-0.07	0.34	-0.01	-0.01	0.4	0.03	-0.03	0.3	0.04	-0.06	-0.22	0.03	0.41	-0.24	-0.08	-0.07	-0.17	0.46	-0.08	-0.36	-0.31	-0.25	-0.11	-0.28	0.31	0.61	0.04	0.06	-0.11	0.11	-0.05	0.02	-0.06	0.24	-0.05	0.55	0.19	0.42	0.08	0.03	0.03	-0.29	0.31	-0.09	0.52	NA	0.08
ARD1B	0.29	0.19	0.49	-0.1	-0.45	0.12	-0.08	0.36	0.42	-0.26	0.14	0.42	0.97	0.14	-0.09	-0.59	0.22	0.39	0.35	0.45	0.39	0.47	0.37	0.46	0.35	0.6	-0.08	-0.14	0.34	0.33	0.47	0.99	0.38	0.34	0.42	0.08	0.71	0.25	0.09	-0.05	0.01	0.32	0.23	0.24	0.15	0.48	-0.07	-0.02	0.27
AREG	-0.51	NA	-0.35	-0.06	0	0.05	NA	0.18	NA	NA	NA	NA	-0.46	NA	-0.09	-0.46	NA	NA	-0.19	0.32	0.15	0.5	NA	-1.11	0.81	0.35	NA	NA	NA	NA	0.65	-0.54	0.33	NA	NA	NA	NA	0.15	NA	NA	0.14	NA	0.06	NA	-0.49	1.17	0.56	NA	1.07
ARF1	-0.101429	0.147143	-0.0957143	0.185714	0.105714	-0.191429	-0.04	0.122857	-0.122857	-0.157143	-0.412857	-0.29	-0.227143	-0.125714	0.118571	-0.195714	-0.245714	-0.355714	0.0714286	0.108571	0.0542857	-0.305714	0.02	-0.145714	0.0542857	-0.0114286	0.00857143	0.377143	0.02	-0.0171429	-0.257143	0.0414286	-0.181429	0.01	0.301429	-0.0314286	0.0371429	-0.07	-0.0742857	0.0342857	0.0442857	-0.584286	-0.182857	-0.0428571	0.178571	0.247143	-0.0116667	0.29	0.0842857
ARF3	-0.2	-0.38	0.24	0.28	-0.11	0.34	-0.44	0.54	0.16	0.02	0.09	0.61	-0.15	0.32	0.62	-0.09	0.24	-0.12	-0.13	-0.16	-0.6	0.73	-0.21	0.32	-0.84	-0.19	-0.03	-0.46	0.24	-0.18	0.16	0.6	0.31	-0.44	-0.43	-0.45	0.04	0.24	-0.04	-0.31	0.27	-0.27	0.46	0.33	0.13	0.35	0.41	0.46	0.43
ARF4	0.22	-0.55	0.08	-0.75	-0.59	-0.695	-0.55	-0.465	-0.765	-0.775	-0.6	-0.25	-0.34	-0.605	-0.61	0.18	-0.795	-0.74	-0.175	-0.315	0.24	-0.035	0.015	-0.755	0.12	-0.095	-0.205	-0.175	-0.165	-0.225	-0.125	-0.18	-0.155	-0.155	-0.91	-0.385	-0.395	-0.35	-0.74	-0.62	-0.11	-0.47	-0.51	-0.17	0.28	-0.18	-0.065	-0.48	-0.385
ARF5	0.38	0.13	0.34	0.07	0.12	-0.32	0.42	-0.16	0.26	0.18	0.07	-0.15	-0.25	0.17	0.16	0.62	0.2	0.13	-0.09	0.18	0.1	-0.11	0.16	-0.43	-0.06	-0.02	0.21	0.36	0.03	0	-0.54	-0.04	-0.15	0.08	0.43	-0.08	0.06	-0.31	0.26	-0.02	0.09	-0.18	-1.02	-0.1	-0.51	0.2	-0.25	NA	0.64
ARF6	0.15	0.28	0.04	-0.06	0.07	-0.51	0.41	0.29	0.11	0.12	0.21	-0.16	-0.48	0.06	-0.1	-0.17	-0.06	-0.15	0.19	0.29	0.07	-0.43	0.23	-0.09	-0.01	0.09	0.03	0.22	0.11	0.17	-0.11	0.03	-0.52	0.09	0.09	0.15	0.13	0.03	0.09	0.01	0.33	-0.06	-0.4	0.19	-0.25	0.08	0.52	-0.52	0.14
ARFGAP1	0.12	-0.08	0.41	0.26	-0.02	0.47	-0.11	0.14	0.38	-0.27	-0.02	-0.2	0.17	-0.18	0.32	-0.15	0.01	-0.16	-0.42	0.78	-0.61	0.45	-0.02	0.94	-0.43	-0.02	-0.14	-0.53	-0.5	-0.21	0.51	0.52	0.44	-0.25	-0.26	-0.46	-0.43	0.4	-0.42	-0.73	0.36	-0.3	0.29	-0.39	0.01	-0.01	-0.08	-0.07	0.35
ARFGAP3	0.4	-0.17	-0.18	-0.07	-0.58	-0.25	0.07	-0.45	-0.49	-0.14	-0.02	0.19	0.19	-0.93	-0.56	1.05	-0.8	0.21	0.1	-1.12	-0.1	0	0.15	-0.51	-0.19	-0.03	0	-0.19	-0.02	0.17	-0.01	-0.4	-0.13	0.12	-0.45	0.11	-0.13	-0.52	-0.94	-0.8	-0.69	-0.02	-0.67	0.16	-0.8	-0.41	-0.29	-0.55	-0.23
ARFGEF1	-0.17	-0.21	0.22	0.23	0.15	0.13	-0.05	-0.34	0.37	-0.41	-0.48	-0.12	-0.24	0.01	-0.36	0.69	0.43	-0.29	-0.2	0.16	-0.29	0.11	0.05	-0.08	-0.3	-0.28	0.06	-0.32	-0.12	0.09	-0.29	-0.35	-0.49	-0.12	-0.11	-0.06	-0.12	-0.63	0.07	0.15	0.18	-0.2	0.02	-0.03	-0.43	-0.66	-0.56	-0.27	-0.2
ARFGEF2	NA	0.23	0.38	0.16	0.4	-0.04	-0.04	NA	0.15	0	0.47	NA	NA	-0.03	-0.33	NA	-0.03	0.06	-0.01	0.27	0.15	-0.35	0.18	-0.41	NA	0.32	NA	0.08	NA	0.42	0.06	-0.23	NA	0.49	0.13	0.28	-0.24	-0.09	-0.04	NA	NA	-0.1	NA	0.37	NA	0.74	NA	NA	NA
ARFIP1	0.11	-0.09	-0.1	0.12	-0.56	0.28	-0.12	0.04	0.58	0.05	0.09	-0.03	0.4	0.19	-0.02	0.35	0.38	0.19	-0.27	-0.18	-0.26	0.42	0.21	0.18	-0.23	-0.03	-0.08	-0.42	-0.17	-0.05	0.25	-0.48	-0.01	-0.1	0.2	-0.01	-0.04	-0.34	0.05	-0.24	-0.32	-0.11	0.16	-0.31	-0.14	-0.34	-0.01	0.22	0.15
ARFIP2	-0.33	-0.16	0.18	-0.08	0.45	0.13	0.07	0.13	0.39	0.03	0.08	-0.19	-0.3	0.21	0.13	-0.35	0.11	0.02	-0.65	0.37	-0.67	-0.15	-0.37	0.18	-0.47	-0.56	0.17	0.19	-0.14	-0.06	0.14	0.43	0.27	0.04	0.09	-0.01	-0.34	0.01	0.24	0.05	0.19	-0.16	0.07	0.09	0.17	-0.2	-0.27	0.42	0.14
ARFRP1	-0.18	0.04	0.21	-0.135	-0.2	0.23	-0.09	-0.02	0.015	0.13	0.065	-0.11	-0.27	-0.12	0.07	0.215	0.005	-0.185	-0.07	0.11	-0.01	-0.1	-0.15	-0.49	-0.1	-0.08	-0.185	-0.095	0.015	-0.085	-0.085	0.51	-0.19	-0.055	0.125	0.25	0.175	-0.5	0.055	0.02	-0.03	-0.01	0.085	-0.235	0.385	0.035	0.1	NA	0.545
ARG1	0.68	-0.03	NA	-0.37	-0.05	0.17	0.05	-0.05	0.43	0.03	-0.2	0.14	-0.77	0.05	-0.21	0.54	0.28	0.1	0.05	-0.63	-0.01	-1.06	-0.08	-0.82	0.57	0.06	0.25	0.43	0.19	0.25	0.13	-0.34	-0.2	0.12	0.26	-0.08	0.03	-0.61	0.28	0.39	-1.25	-0.01	-0.14	-0.03	-0.34	0.2	NA	NA	-0.4
ARG2	-0.46	-0.24	0.15	0.23	-0.05	0.23	-0.05	0.06	0.37	-0.33	0.09	-0.15	-0.64	0.41	0.35	-0.69	0.45	-0.08	-0.59	0.43	-0.85	-0.03	-0.64	-0.01	-0.71	-0.72	-0.05	-0.04	-0.23	-0.27	0.24	0.72	0.4	-0.19	0.25	-0.06	-0.4	0.02	0.54	0.82	0.08	-0.13	-0.01	-0.1	-0.5	-0.66	-0.47	-0.37	0.31
ARHGAP1	0.165	0.33	-0.07	-0.21	0.265	-0.185	0.195	-0.255	-0.2	-0.2	-0.085	-0.115	0.165	-0.165	-0.115	0.41	-0.23	-0.155	0.05	0.22	0.17	-0.085	0.04	-0.05	0.1	0.185	-0.16	-0.01	0.055	0.025	0.1	0.035	-0.17	0.01	-0.145	-0.2	-0.125	0.1	-0.35	-0.24	0.01	-0.2	-0.105	0.11	0.19	-0.275	-0.505	-0.26	-0.34
ARHGAP10	0.17	0.0666667	-0.07	0.286667	0.39	0.243333	0	0.08	0.0333333	0.0466667	0.0633333	0.1	0.386667	-0.0166667	0.356667	-0.13	0.0866667	0.08	0.0433333	-0.04	-0.133333	0.3	0.183333	0.436667	0.00666667	0.0133333	0.113333	-0.0633333	-0.05	-0.0366667	0.676667	0.15	0.256667	0.09	-0.09	-0.0366667	-0.143333	0.126667	-0.00333333	-0.186667	-0.11	0.0366667	-0.0466667	-0.0166667	0.113333	-0.01	0.0366667	0.07	0.39
ARHGAP11A	0.43	-0.09	-0.06	0.31	0.46	0.12	-0.06	0.28	0.53	-0.02	0.14	0.06	-0.14	0.29	0.25	-0.4	0.56	0.18	-0.43	0.14	-0.5	0.36	-0.28	0.39	-0.51	-0.34	0.15	-0.2	-0.23	-0.19	-0.03	-0.13	0.15	-0.08	0.17	-0.23	-0.18	0.2	0.18	0.14	-0.26	-0.01	0.31	-0.15	0.16	0.31	-0.09	-0.74	-0.06
ARHGAP12	0.74	-0.18	-0.12	0.52	-0.5	-0.32	0.07	0.61	-0.68	-0.1	0.04	0.08	-0.45	-0.27	0.27	0.27	-0.27	-0.12	0.28	-0.58	0.15	0.03	-0.17	-0.24	0.14	-0.02	0.36	0.62	0.23	0.45	0.44	-0.14	0.11	0.48	-0.18	0.13	0.03	-0.04	-0.31	0.1	0.03	0	-0.02	0.17	0.23	0.46	0.9	NA	NA
ARHGAP15	-0.53	0.14	0.83	0.53	-0.73	-0.52	0.34	0.16	-1	0.61	-0.87	0.12	NA	-0.7	0.68	-0.56	-1.25	0.04	0.15	0.87	0.32	-1.06	NA	-0.06	0.21	-0.24	0.41	1.35	0.58	0.45	0.17	0.29	-0.28	0.69	-0.52	0.6	0.3	0.02	-0.61	-0.25	0	-0.22	NA	0.71	0.58	NA	0.29	NA	NA
ARHGAP17	0.075	0.05	0.095	0.18	-0.05	0.085	0.04	0.02	0.405	-0.02	0.2	0.075	-0.085	0.325	0.195	-0.06	0.29	0.115	-0.21	0.455	-0.205	0.435	0.045	0.24	-0.265	-0.07	0.025	-0.065	-0.135	-0.13	0.115	0.21	0.09	-0.165	0.155	-0.145	-0.075	-0.175	0.29	-0.11	0.025	0.07	0.08	0.075	-0.105	-0.155	0.04	0.445	0.065
ARHGAP18	NA	-0.43	-0.41	-0.46	-0.97	-0.25	1	-0.05	-0.52	1.28	0.67	0.44	0.14	-0.16	-0.55	0.03	-0.46	0.93	0.48	0.18	0.07	-0.01	NA	0.8	0.18	0.08	-0.19	-0.19	0.21	-0.09	0.28	0.05	-0.23	-0.09	0.2	-0.23	-0.48	-0.19	-0.01	0.21	0.42	1.18	0.01	0.27	-0.3	0.91	-0.34	NA	NA
ARHGAP19	0.5	0.03	-0.09	-0.05	0.51	0.2	0.06	0.01	0.06	-0.14	0.13	0.12	0.04	0.03	-0.03	-0.03	-0.08	0.08	0.16	-0.47	-0.08	0.07	-0.02	0.18	0.15	-0.07	0.15	0.21	-0.02	0.23	-0.19	-0.59	-0.11	0.17	-0.2	0.12	-0.19	-0.01	-0.18	-0.18	-0.01	-0.03	0.19	0.1	0.36	-0.07	-0.26	-0.01	-0.49
ARHGAP20	-0.22	-0.34	-0.01	-0.37	-0.61	-0.42	-0.4	-0.39	-0.05	-0.36	-0.32	-0.11	-0.38	0	-0.32	0.48	-0.18	-0.24	-0.18	-0.19	NA	-0.1	-0.31	-0.48	-0.05	-0.15	-0.34	-0.31	-0.07	-0.17	-0.17	0.2	-0.5	-0.1	-0.3	-0.08	-0.17	-0.38	-0.01	0.42	0.1	-0.12	-0.21	-0.03	-0.07	-0.52	-0.8	-0.45	-0.26
ARHGAP21	0.51	-0.16	-0.27	-0.06	-0.52	-0.14	-0.07	-0.06	0.39	0.11	-0.08	0.14	0.05	0.14	0.01	0.16	-0.13	-0.01	0.05	-0.44	-0.02	0.31	0.31	0.18	0.07	0.21	0.04	-0.25	-0.09	0.03	0.18	0.02	0.08	0.04	0.13	0.21	0	0.01	-0.06	-0.02	-0.31	0.23	0.13	-0.11	0	0.38	-0.55	-0.51	0.05
ARHGAP22	NA	0.2	0.25	0.11	0.39	-0.11	0.19	-0.09	-0.04	-0.13	0.18	0.27	NA	0.22	0.26	0.4	0.32	0.31	0.26	NA	0.19	0.32	NA	1.41	NA	NA	-0.31	0.47	-0.06	-0.21	-0.58	1	0.45	0.49	0.32	0.15	0.26	0.23	0.09	NA	0.72	0.29	-0.38	0.21	NA	0.87	0.3	NA	NA
ARHGAP23	-0.163333	0.00666667	0.1	0.0833333	0.326667	0.2	-0.116667	-0.0566667	0.53	-0.14	0.103333	0.12	0.516667	0.243333	0.21	-0.42	0.273333	0.156667	-0.0833333	0.606667	0.0433333	0.433333	0.433333	0.396667	-0.0233333	0.23	-0.0366667	-0.51	-0.196667	-0.13	0.236667	0.613333	0.23	0.06	0.25	-0.0966667	0.126667	0.0733333	0.09	-0.0666667	-0.133333	-0.0833333	0.11	-0.213333	0.396667	0.0533333	0.106667	0.27	0.143333
ARHGAP24	1.03	-0.06	0.12	0.02	0.17	0	0.32	0.01	0.08	0.03	0.25	0.15	0.67	-0.19	0.09	0.41	0.01	0.27	0.38	0.19	0.21	-0.12	0.48	0.45	-0.02	0.1	0.1	-0.01	0.31	0.15	0.24	0.38	0.26	0.18	0.08	0.4	0.19	-0.03	-0.1	-0.31	0.45	0.04	-0.51	0.25	-0.11	-0.15	0.25	-0.1	-0.04
ARHGAP25	0.1	-0.31	-0.02	-0.3	0.6	-0.71	0.54	0.18	-1.19	0.17	0.22	-0.13	-0.36	-0.55	-0.29	-0.21	-0.8	-0.14	0.25	-0.38	-0.24	-1.06	-0.49	-0.43	-0.14	-0.27	0.48	0.78	0.04	0.26	-0.12	-0.32	-0.33	0.4	-0.53	0.23	-0.01	-0.59	-0.48	-0.16	0.25	0.2	-0.17	-0.02	-0.06	-0.07	0.06	0.29	-0.18
ARHGAP26	-0.16	0.03	-0.03	-0.06	0.51	0.06	0.32	0.29	0.23	-0.09	0.35	0.07	-0.21	0.08	0.11	0.33	0.4	0.05	0.06	-0.23	-0.21	-0.21	-0.13	0.25	-0.13	0.07	0.25	0.15	0.16	0.17	0.01	-0.11	-0.51	0.03	0.1	-0.15	-0.15	-0.3	0.25	0.05	0.11	0.09	0.3	-0.11	-0.29	0.3	0.51	0.44	-0.57
ARHGAP28	0.29	-0.26	-0.14	0.27	-0.07	0.11	0.1	0.02	-0.22	0.03	0.06	-0.07	-0.37	-0.01	-0.14	-0.24	-0.1	-0.17	-0.17	-0.16	-0.37	-0.04	-0.46	-0.22	-0.44	-0.52	0.19	0.09	0.27	0.1	-0.1	0.04	0.01	-0.19	-0.15	0.02	-0.2	0.35	-0.15	0.37	0.15	-0.1	-0.44	0.1	-0.2	-0.46	0.38	0.32	-0.09
ARHGAP29	NA	0.02	NA	1.17	0.39	0.45	0.2	NA	0.1	-0.43	0.24	1.04	NA	0.5	0.86	NA	0.45	-0.1	0.29	NA	-0.71	NA	-0.39	NA	-0.12	-0.03	0.01	0.19	-0.35	0.24	1.3	NA	NA	0.09	-0.08	0.2	-0.11	NA	-0.18	0.07	-0.05	0.24	NA	NA	NA	NA	NA	NA	1.22
ARHGAP4	-0.25	-0.25	-0.12	0.12	0.02	-0.09	-0.04	0.08	-0.1	0.04	-0.08	-0.11	-0.35	0.03	0.14	-0.29	-0.08	-0.06	-0.17	0.27	-0.59	0.06	-0.11	0.01	-0.35	-0.42	-0.04	-0.04	-0.07	-0.11	-0.34	-0.1	0.04	-0.25	0.13	-0.12	-0.11	-0.1	0	0.06	0.37	-0.11	0.05	-0.09	-0.8	-0.16	0.05	-0.31	0.26
ARHGAP5	1.1	-0.14	0.67	0.82	0.17	0.63	-0.19	NA	-0.04	-0.41	0.18	-0.21	-0.44	0.18	0.61	-0.08	-0.16	-0.04	-0.05	-1.45	0.04	-0.02	-0.12	NA	-0.12	-0.12	-0.04	0.01	0.33	-0.24	-0.02	NA	-0.42	-0.3	0.02	0.23	-0.08	0.18	-0.04	0.23	0.09	-0.02	-1.66	0.02	NA	1.03	NA	NA	NA
ARHGAP6	0.27	-0.06	-0.08	-0.13	-0.35	0.06	0.21	-0.39	-0.16	0.34	-0.04	-0.24	-0.74	0.06	-0.05	0.07	-0.04	-0.1	-0.29	0.06	-0.27	-0.29	-0.57	0.11	-0.15	-0.42	0.05	0.35	-0.09	-0.11	-0.26	-0.1	-0.38	-0.2	-0.03	0.06	-0.22	0.2	0.09	0.22	-0.04	-0.09	-0.01	-0.34	-0.25	0.03	0.35	-0.5	-0.23
ARHGAP8	-0.97	-0.25	NA	0.53	0.05	0.38	-0.08	0.29	0.19	-0.39	-0.08	0.45	0.61	0.03	0.34	0.22	0.26	-0.03	-0.18	-0.27	-0.2	0.4	-0.06	0.71	0.08	NA	-0.05	0.05	0.24	0.27	0.64	-0.05	0.35	0.14	0.15	-0.18	0.08	-0.31	0.17	0.11	-0.28	0.34	0.53	0.53	0.39	-0.78	0.5	NA	0.11
ARHGAP9	-0.05	-0.105	-0.09	0.005	0.705	-0.185	0.085	-0.06	-0.22	-0.085	0.11	-0.1	0.38	-0.205	0.175	-0.145	-0.2	0.01	0.09	-0.17	0.15	-0.33	-0.02	-0.21	0.245	0.195	0.125	0.2	0.125	0.155	0.26	0.015	0.075	0.19	-0.05	0.095	0.095	-0.155	-0.285	-0.27	0.03	0.115	-0.105	-0.14	0.22	0.06	0.17	0.165	-0.09
ARHGDIA	0.06	-0.11	0.46	0.31	-0.09	0.16	-0.05	0.38	0.22	0.07	-0.16	-0.18	-0.26	0.05	0.37	-0.56	0.04	0.03	-0.32	0.15	0.33	0.16	-0.2	0.81	0.03	NA	0.15	0.45	-0.04	-0.05	0.55	0.69	0.33	-0.14	0.24	-0.05	-0.01	0.15	0.07	-0.03	0.14	-0.18	0.41	0.04	0.7	-0.25	-0.19	-1.28	0.23
ARHGDIB	-0.6	0.26	-0.65	-0.4	-0.72	-0.33	0.29	0.22	0.21	0.52	0.05	0	-0.03	0.25	0.2	0.13	0.09	0.12	0.73	0.09	0.51	-0.49	-0.16	0.03	0.76	0.15	0.33	0.46	0.4	0.42	0	0.1	0.29	0.77	0.49	0.47	0.13	0.54	0.1	0.51	0.13	0.2	-0.47	0.65	0.35	-0.29	0.78	1.3	0.67
ARHGDIG	0.61	-0.16	-0.13	-0.35	0.33	0.01	0.15	-0.09	-0.19	0.04	0.04	-0.08	-0.2	0.11	0.14	-0.28	-0.07	-0.11	0.02	-0.42	0.07	0.32	-0.39	-0.46	-0.02	-0.21	0.05	0.12	-0.08	0.03	0.36	0.27	0.23	-0.17	0.04	0.08	-0.08	0.04	-0.12	-0.42	0.1	0.11	0.06	-0.01	0.34	0.04	0.22	-0.35	-0.24
ARHGEF1	0.15	0.07	-0.16	0.15	0.19	0.16	-0.05	0.07	-0.08	-0.06	-0.21	-0.09	0.35	0.3	0.12	-0.21	0.06	-0.09	0.24	0.39	0.31	0.05	-0.49	0.12	0.82	0.27	-0.19	0.5	0.17	0.13	0.17	1.06	0.09	0.32	0.88	0.03	0.14	0.41	0.18	0.65	0.7	0.02	0.23	-0.49	0.53	0.38	-0.76	NA	1.13
ARHGEF10	-0.375	-0.18	-0.035	-0.095	0.05	-0.32	0.01	-0.045	-0.44	0.03	0.005	-0.295	-0.13	0.03	-0.13	-0.35	-0.12	-0.155	-0.155	0.35	-0.02	-0.14	-0.305	-0.24	-0.01	-0.095	-0.01	-0.005	-0.055	-0.085	0.135	0.075	0.235	-0.145	0.065	-0.03	0.025	0.23	-0.07	0.2	0.38	-0.035	-0.22	-0.09	0.045	-0.13	-0.12	0.015	0.03
ARHGEF10L	-0.04	-0.295	0.025	-0.315	0.09	-0.025	-0.495	-0.39	-0.18	-0.4	-0.265	-0.28	0.105	-0.29	-0.37	0.615	0.05	-0.175	-0.495	-0.125	-0.71	0.125	-0.05	-0.115	-0.695	-0.325	-0.495	-1.08	-0.645	-0.43	-0.255	-0.225	-0.355	-0.485	-0.345	-0.495	-0.255	-0.475	-0.385	-0.68	-0.04	-0.35	0.045	-0.465	-0.625	-0.78	-0.985	-0.48	-0.485
ARHGEF11	-0.26	-0.15	-0.46	0.08	-0.5	0.1	-0.26	-0.12	0.03	-0.04	-0.11	-0.11	-0.15	-0.17	0.04	0.19	-0.08	-0.2	-0.14	-0.34	-0.24	-0.06	-0.04	-0.07	-0.21	-0.2	-0.1	-0.12	0.05	-0.09	-0.19	-0.33	-0.08	-0.14	-0.24	-0.29	-0.21	-0.16	-0.14	-0.25	-0.11	-0.22	-0.23	-0.08	-0.02	0.09	-0.07	-0.03	-0.1
ARHGEF12	-0.0866667	-0.05	0.0666667	-0.116667	-0.22	0.0933333	0.04	0.326667	-0.0266667	0.0533333	-0.0766667	0.06	0.136667	0.116667	-0.25	-0.333333	0.0633333	0.01	-0.0233333	0.213333	0.336667	0.14	0.116667	-0.07	0.0333333	0.216667	0.00333333	-0.16	-0.0633333	0.06	0.213333	0.123333	0.00666667	-0.01	0.09	-0.0233333	0.12	-0.06	-0.0266667	-0.0566667	-0.0266667	0.113333	-0.413333	-0.0266667	0.126667	0.396667	0.11	0.526667	0.285
ARHGEF15	0.475	-0.035	-0.06	-0.07	0.33	0.13	-0.135	0.25	0.16	-0.12	0.035	0.3	0.185	0.155	-0.16	0.03	0.14	0.21	-0.03	-0.135	-0.01	0.03	0.18	-0.18	0.05	0.245	0.015	-0.205	0.05	0.09	0.13	0.135	0.18	-0.065	0.095	-0.125	0.085	-0.045	0.02	-0.495	-0.41	0.075	0.205	0.14	0.205	0.075	-0.03	-0.035	0.11
ARHGEF16	NA	0.26	0.62	0.11	0.02	0.42	0.17	-0.01	0.03	0.17	-0.01	NA	0.53	NA	0.68	-0.1	0.21	0.19	0.54	0.31	0.37	0.28	0.37	0.75	0.68	0.7	0.27	0.22	-0.16	NA	-0.28	0.88	0.77	0.22	0.23	-0.12	0.25	0.54	0.41	NA	0.75	0.3	0.04	-0.27	0.69	0.01	0.64	0.5	0.38
ARHGEF17	0.81	-0.25	-0.16	0	0.01	0.2	0.24	-0.23	0.46	0.15	0.13	0.13	-0.44	0.15	0.05	0.21	0.48	0.03	-0.16	0.31	NA	0.02	-0.28	0.12	NA	NA	0.19	0.32	-0.25	0.08	-0.28	-0.23	0	0.11	0.04	0	-0.16	-0.18	0.2	0.19	0.2	0.04	0.1	-0.24	0.11	-0.26	-0.65	-0.4	0
ARHGEF18	-0.11	-0.085	-0.19	0.04	-0.37	-0.085	-0.23	-0.39	-0.405	-0.005	-0.375	-0.4	-0.115	-0.3	-0.145	0.225	-0.355	-0.195	-0.125	-0.36	-0.015	0	-0.075	-0.37	0.13	-0.135	-0.32	-0.22	-0.095	-0.185	0.39	-0.385	-0.22	-0.005	-0.06	-0.135	-0.16	0.08	-0.36	-0.175	-0.015	-0.175	-0.03	-0.125	0.41	-0.085	-0.13	0.225	-0.16
ARHGEF2	0.1	0.04	-0.14	-0.19	0.2	-0.24	-0.11	-0.23	0.23	-0.02	-0.09	-0.5	-0.16	-0.13	-0.19	0.53	0.16	-0.04	-0.07	-0.14	-0.33	-0.31	-0.3	-0.46	-0.16	-0.12	-0.16	-0.3	-0.43	-0.28	-0.77	-0.54	0.02	-0.24	0.21	-0.43	-0.28	0.07	-0.04	-0.18	-0.08	-0.45	-0.23	-0.37	-0.62	-0.54	-0.29	-0.28	-0.13
ARHGEF3	-0.29	0.13	-0.15	0.13	-0.65	0.04	0.01	0.06	-0.13	0.25	0.19	-0.1	NA	-0.06	0.15	0.2	0.04	0.11	-0.05	-0.4	0.03	-0.77	-0.46	0.03	-0.03	-0.12	-0.33	-0.11	-0.86	-0.03	-0.12	-0.28	0.37	0.01	0.18	0.09	0.03	-0.62	-0.02	0.29	-0.63	0.11	0.51	-0.5	-0.07	0.19	-0.94	NA	-1.29
ARHGEF4	NA	-0.2	NA	NA	NA	NA	-0.12	NA	0.1	-0.15	-0.06	0.05	-0.22	0.47	NA	-0.86	0.19	-0.13	NA	0.74	-0.65	NA	-0.47	NA	1.55	-0.09	-0.09	-0.02	-0.3	-0.31	NA	NA	0.56	-0.04	-0.08	-0.08	-0.15	NA	-0.01	0.19	NA	-0.02	NA	-0.07	NA	NA	NA	NA	NA
ARHGEF5	1.23	0.66	0.25	0.44	0.34	0.19	0.4	0.09	0.32	0.12	0.29	-0.01	-0.39	0.47	0.09	-0.48	0.23	0.02	-0.09	0.21	-0.26	0.1	0	0.45	-0.21	-0.04	0.22	0.44	0.27	0.27	0.01	-0.18	0.36	0.19	0.17	0.31	0.02	0.12	0.19	0.22	0.32	0.13	0.02	0.14	-0.41	0.22	0.49	0.11	-0.05
ARHGEF6	0.5	0.07	NA	-0.47	0.61	-0.04	0.08	0.08	0.25	-0.2	-0.09	0.15	0.14	0.09	0.41	0.24	0.12	0.07	0.23	-0.39	0.22	-0.72	0.33	0.05	-0.27	0.3	-0.01	-0.06	0.12	-0.21	0.25	-0.38	0.02	-0.02	0.14	0.19	0.11	-0.28	0.15	-0.13	0.08	-0.01	-0.54	0.22	NA	-0.3	NA	0.18	-0.86
ARHGEF7	0.25	-0.11	0.09	-0.03	-0.37	0.12	0.03	-0.38	0.28	0.02	0.08	-0.22	0.09	-0.02	0.08	0.04	0.09	0.22	-0.13	0.59	-0.07	-0.05	-0.03	-0.23	0.17	NA	0.02	0.29	0.16	0.17	0.03	0.08	-0.16	0.21	0.31	0.47	0.21	-0.24	0.24	0.15	-0.1	0.15	0.47	0.1	-0.61	-0.43	-0.13	NA	-0.08
ARHGEF9	-0.08	0.02	NA	0.29	NA	-0.04	0.26	0.24	0.15	0.24	-0.2	-0.19	-0.31	0.26	0.87	-0.24	0.15	-0.27	0.07	NA	0.16	NA	-0.06	0.68	-0.34	0.01	-0.27	-0.41	-0.85	-0.44	0.01	1.04	0.58	-0.54	0.59	NA	NA	0.63	0.21	0.13	0.76	-0.24	0.07	NA	0.23	-0.46	0.02	NA	-0.8
ARID1A	-0.39	0.17	-0.12	-0.57	-0.2	0.02	0.24	0.07	0.555	0.145	0.165	-0.35	-0.06	0.62	-0.1	0.06	0.52	-0.04	0.09	-0.065	-0.14	0.48	0	-0.06	0.315	0.105	0.215	0.1	0.14	0.08	0.385	-0.025	-0.005	0.38	0.595	0.295	0.09	0.22	0.835	0.625	0.18	0.18	-0.025	-0.02	0.125	0.5	0.28	0.18	0.39
ARID1B	0.1	0	-0.0025	-0.105	0.0225	0.0575	-0.16	0.16	-0.025	0.0025	-0.0075	0.115	0.0133333	0.02	-0.13	0.1575	0.045	-0.0525	0.065	-0.035	-0.01	0.045	0.1275	0.0175	-0.13	0.0625	-0.065	-0.1425	0.0433333	0.0175	0.11	0.06	0.21	-0.055	-0.0875	0.0225	0.0775	-0.0775	-0.0975	-0.045	0.21	0.08	-0.2325	0.1375	-0.0525	-0.1175	0.57	0.96	0.0475
ARID2	-0.7	-0.08	-0.08	-0.23	0.4	0.09	-0.61	0.07	0.21	-0.27	0.06	0.02	0.34	0.15	-0.35	0.17	0.16	-0.19	-0.55	-0.06	-0.65	-0.5	-0.15	-0.25	-0.28	-0.28	-0.44	-0.72	-0.56	-0.32	0.19	0.07	-0.05	-0.41	0.05	-0.32	-0.01	-0.27	0.04	0	-0.35	-0.15	0.38	-0.2	0.15	-0.1	-1.12	0.22	-0.19
ARID3A	-0.22	0.08	-0.16	-0.03	0.26	0.08	0.36	0.14	0.33	0.2	0.36	-0.08	-0.12	0.41	0.12	0.04	0.33	0.01	-0.17	-0.24	-0.46	-0.05	-0.4	-0.02	-0.37	-0.24	0.31	0.09	-0.05	-0.03	-0.1	-0.14	-0.26	-0.1	0.35	0	0	0.32	0.41	0.39	-0.13	0.15	0.32	-0.12	-0.27	-0.33	-0.23	0	-0.08
ARID3B	0.035	-0.055	0.05	0.01	0.02	0.32	0.08	0.27	0.545	0.13	0.4	0.37	-0.115	0.4	0.005	0.355	0.495	0.21	-0.29	-0.22	-0.76	0.32	-0.04	-0.21	-0.655	-0.25	0.2	-0.27	-0.04	0.015	0.135	-0.395	-0.61	-0.085	0.09	-0.175	-0.015	-0.3	0.27	-0.225	-0.21	0.01	0.335	0.03	-0.405	0.04	-0.09	-0.21	-0.14
ARID4A	0.155	-0.23	-0.205	0.12	0.115	0.065	0.03	-0.45	0.06	0.01	0.02	-0.085	-0.43	0.05	0.005	0.1	0.045	0.005	-0.155	-0.1	-0.19	-0.265	-0.415	-0.105	-0.275	-0.185	-0.01	-0.135	-0.125	-0.1	-0.08	-0.285	-0.11	-0.205	-0.155	-0.075	-0.23	-0.09	0.05	0.225	0.165	-0.175	0.185	-0.14	-0.19	0.17	0.105	-0.66	-0.18
ARID4B	-0.3	0.23	-0.03	0.49	0.07	NA	-0.05	0.89	0.01	-0.06	0.08	-0.51	-0.47	0.19	0.25	-0.38	0	-0.17	-0.28	NA	-0.34	0.18	-0.8	0.12	1.07	-0.14	0.17	0.69	-0.24	-0.47	0.01	0.24	0.97	0.29	0.19	0.32	-0.04	0.52	0.14	0.6	NA	-0.33	1.39	0.2	NA	1	0.91	NA	NA
ARID5A	0.32	-0.06	-0.09	-0.32	0.26	-0.29	0.03	-0.06	-0.37	0.01	0.03	-0.26	-0.03	-0.08	-0.03	-0.27	-0.39	-0.2	0.13	-0.26	0.2	-0.35	-0.13	-0.1	0.25	0.02	-0.01	0.14	0.01	0.06	0.09	0.6	0.08	0.12	-0.14	0.09	-0.23	0.72	-0.09	0.19	-0.19	0.04	-0.09	-0.19	0.63	0.18	-0.1	0.02	-0.01
ARID5B	-0.32	-0.72	-0.61	0.13	-0.46	0.34	1.02	0.76	-1.09	1.06	0.88	0.48	-0.92	-0.25	0.96	-0.54	-0.25	0.84	-0.43	-0.03	-0.28	-0.56	-0.64	-0.51	0.05	-0.18	-0.46	0.17	-0.28	-0.97	0.2	1.13	0.37	-0.46	-0.27	-0.24	-0.34	0.21	-0.39	0	0.28	1	0.26	-0.53	0.93	NA	0.85	NA	1.1
ARIH1	0.18	-0.153333	0.316667	-0.07	0.0233333	0.0666667	-0.0466667	-0.116667	-0.236667	-0.0266667	-0.17	-0.23	-0.0766667	-0.253333	-0.133333	-0.0133333	-0.306667	-0.243333	-0.0533333	-0.0333333	0.245	-0.613333	-0.31	-0.485	0	-0.175	-0.0733333	0.216667	-0.123333	-0.133333	0.123333	0.09	-0.213333	-0.03	-0.0533333	0.0666667	-0.0666667	-0.13	-0.00666667	-0.0533333	-0.35	-0.133333	-0.183333	-0.01	0.403333	-0.44	-0.075	0.255	-0.32
ARIH2	0.8	0	-0.09	0.08	0.03	-0.01	0.1	0.19	-0.03	0.18	0.18	0.1	-0.05	-0.07	0.07	0.54	-0.01	0.31	0.03	-0.3	-0.08	0.09	0.07	-0.03	-0.2	-0.1	0.06	-0.07	0.09	0.12	0.03	-0.22	-0.16	0.27	0	0.05	-0.04	-0.16	0.03	-0.15	0.07	0.22	-0.11	-0.04	-0.19	-0.05	-0.26	-0.41	-0.17
ARL1	-0.13	0.17	0.1	-0.13	0.245	0.03	-0.045	0.075	-0.25	0.045	-0.04	0.045	-0.015	-0.06	0.02	0.22	0.03	0.04	-0.04	0.065	0.015	0.345	0.09	-0.19	-0.125	-0.27	-0.165	-0.165	-0.065	0.21	0.145	0.11	-0.055	0.1	-0.04	0.03	0.21	0.03	0.115	0.09	-0.01	0.01	-0.36	-0.025	-0.12	0.035	0.065	-0.975	-0.115
ARL11	0.01	-0.09	0.06	-0.15	-0.54	-0.03	-0.09	-0.04	0.2	0.26	-0.23	-0.02	0.13	0.07	0.04	0.02	-0.08	-0.06	0.32	0	0.25	-0.33	-0.06	0.06	0.54	0.15	0.13	0.3	0.19	0.22	-0.02	-0.25	0.2	0.04	0.05	-0.15	-0.06	0.04	-0.1	0.66	0.24	-0.03	-0.68	0.25	0.27	0.32	0.43	-0.39	-0.56
ARL14	1.5	0.09	-0.62	0.23	-0.6	-0.24	0.09	0.39	0.19	0.22	0.38	0.32	-1.2	-0.02	0.45	NA	0.26	0.16	-0.11	0.46	0.19	0.2	NA	1.32	-0.09	0.13	0.08	-0.11	0.23	0.26	-0.23	1.24	0.63	0.24	0.13	-0.06	0.1	0.68	0.07	-0.06	NA	0.22	-0.93	0.13	NA	-0.5	NA	NA	NA
ARL15	-0.19	-0.05	0.03	0.05	0.41	-0.03	0.1	0.24	-0.05	0.07	0.19	0.12	0.03	0.07	-0.09	-0.54	-0.07	-0.02	-0.24	0.47	-0.05	0.29	0.04	-0.01	0.01	-0.08	0.05	0.13	0.03	-0.13	0.2	-0.03	0	-0.17	-0.13	-0.03	-0.32	-0.19	-0.02	-0.29	0.54	0.02	-0.07	0.24	-0.04	-0.62	NA	NA	0.38
ARL17	-0.16	-0.08	0.19	0.51	0.4	-0.59	0.1	0.04	-0.03	0.04	0.11	0.03	-0.11	0.27	0.5	0	0.11	0	0.06	-0.28	-0.07	0.2	0.22	-0.43	-0.18	-0.21	0.18	0.04	-0.06	-0.08	-0.14	-0.15	-0.22	-0.06	0.04	0.02	-0.12	0.01	0.12	0.39	0.25	-0.04	0.16	0	-0.28	-0.89	-0.25	-0.09	-0.84
ARL17P1	0.105	0.11	-0.145	0.265	-0.19	0.29	-0.005	-0.27	-0.055	-0.02	0.04	-0.015	0.305	0.03	0.01	-0.2	0.005	0.025	-0.115	0.46	-0.08	0.085	-0.17	0.175	0.14	0.03	0.095	0.105	0.125	-0.04	0.31	0.35	0.35	0.13	0.03	0.025	0.01	0.32	-0.095	-0.035	0.03	0.02	0.135	0.255	0.715	-0.205	0.13	0.54	0.28
ARL2	-0.06	0.12	-0.01	0.32	-0.48	0.39	0.18	-0.04	0.36	0.06	0.22	0.13	0.16	0.12	0.17	0.32	0.26	0.29	-0.34	-0.38	-0.46	0.46	0.06	0.23	-0.37	-0.07	0.01	-0.21	-0.13	-0.1	-0.05	-0.02	-0.46	-0.06	0.11	0.01	-0.16	-0.13	0.18	-0.35	-0.31	0.12	0.62	0.01	-0.04	-0.17	-0.33	0.02	-0.06
ARL2BP	-0.2	0.27	-0.25	0.14	-0.04	-0.49	-0.27	0.39	0.01	-0.11	-0.19	-0.01	-0.18	-0.36	-0.9	0.64	-0.17	0.04	-0.31	-0.83	-0.57	-0.15	-0.46	-0.4	-0.39	NA	0.14	0.41	0.27	0.1	0.21	-0.03	-0.25	0.21	0.04	0.28	-0.08	-0.12	-0.15	-0.1	-1.09	-0.05	0.26	0.13	-0.03	-0.78	-0.72	NA	-0.93
ARL3	0.015	0	0.03	-0.31	0.27	-0.19	0.075	0	-0.465	-0.165	-0.09	-0.105	-0.08	-0.255	-0.04	0.09	-0.415	-0.22	0.145	-0.29	0.35	-0.15	-0.18	-0.505	0.23	0.07	-0.095	0.21	-0.005	-0.025	-0.2	-0.105	-0.09	0.07	-0.235	-0.09	0.105	0.195	-0.075	-0.01	0.26	-0.01	-0.45	0.25	-0.095	0.02	-0.115	-0.25	-0.36
ARL4A	0.1	-0.15	0.455	-0.13	0.125	-0.025	-0.26	-0.225	-0.72	-0.265	-0.29	-0.39	-0.215	0.01	-0.315	0.19	-0.25	-0.005	0	-0.145	0.39	-0.07	0.03	-0.255	0.1	-0.12	-0.25	0.18	-0.095	0.01	-0.08	0.27	-0.045	-0.05	-0.07	-0.475	0.31	-0.2	-0.42	-0.095	-0.71	-0.02	-0.215	0.155	-0.445	0.51	0.25	0.19	-0.025
ARL4C	-0.11	-0.07	0.15	-0.14	-0.32	-0.48	-0.08	-0.38	-0.31	0.06	-0.04	-0.44	0.08	-0.07	-0.26	0.08	-0.21	-0.22	0.05	0.15	0.51	-0.01	-0.17	-0.08	0.55	0.18	-0.07	0.27	-0.09	-0.18	0.01	-0.2	-0.03	-0.01	0.21	-0.08	0.16	-0.17	-0.04	0.03	0.71	-0.05	-0.13	-0.17	0.59	-0.13	0.23	0.19	0.14
ARL4D	0.66	0.23	-0.14	-0.12	-0.03	-0.04	-0.01	0.17	0.3	0.07	0.2	0.09	-0.13	-0.04	-0.02	0.42	0.29	0.2	-0.03	-0.05	-0.3	-0.04	0.02	-0.12	-0.07	-0.23	0.15	-0.13	0.14	0.13	-0.09	-0.18	-0.33	0.13	0.04	0.16	0.03	-0.29	0.12	-0.21	0.36	0.08	-0.09	0.01	-0.46	-0.19	-0.39	-0.41	-0.39
ARL5A	-0.35	0.12	0	0.42	-0.87	-0.08	-0.08	-0.03	-0.15	-0.08	-0.27	0.07	-0.12	-0.27	-0.38	-0.24	-0.28	0.04	0.03	-0.22	0.17	-0.29	-0.29	0.08	0.33	0.17	0	0.21	0.24	0.22	0.03	0.64	-0.19	0.1	-0.04	0.06	0.16	0.15	-0.03	0	-0.69	0.03	-0.52	0.28	0.08	-0.06	NA	NA	NA
ARL5B	-0.14	0.03	-0.12	0.14	0.59	0.17	0.09	0.14	0.39	0	0.13	0.29	0.17	0.31	-0.09	0.3	0.51	0.03	0	-0.16	NA	0.34	0.11	-0.06	NA	-0.08	0.1	-0.22	-0.05	-0.01	-0.2	-0.73	-0.61	0.08	0	-0.12	-0.14	-0.77	0.29	-0.36	-0.46	0.11	-0.11	0.01	-0.51	-0.4	0	-0.82	0.01
ARL6	0.62	-0.09	-0.49	0.01	0.18	-0.1	-0.06	-0.07	-0.13	-0.39	-0.5	-0.03	-0.03	-0.19	-0.13	0.83	-0.09	-0.16	-0.01	-0.27	-0.19	-0.36	-0.05	-0.16	0.03	-0.06	-0.09	-0.17	-0.05	0.13	-0.19	-0.15	-0.22	0.1	-0.24	0.11	-0.3	-0.22	-0.28	-0.12	0.07	-0.06	0.22	-0.08	-0.92	-0.19	-1.05	-0.11	-0.36
ARL6IP1	0.27	-0.18	-0.32	-0.04	-0.14	-0.11	-0.19	0.12	0.24	0.15	-0.07	0.06	0.03	-0.01	-0.09	0.91	0.28	0.01	-0.2	-0.47	-0.22	-0.01	0.02	-0.51	-0.07	-0.14	-0.29	-0.4	-0.35	-0.05	-0.5	-0.58	-0.46	-0.22	-0.02	-0.16	-0.22	-0.54	0.05	-0.24	-0.29	-0.21	-0.2	-0.29	-0.39	-0.55	-0.18	-0.41	-0.56
ARL6IP2	NA	0.48	NA	0.51	0.24	NA	0.37	-0.35	-0.17	0.25	0.1	0.08	-0.51	0.37	0.27	0.4	-0.35	-0.12	-0.2	NA	-0.55	0.01	0.07	NA	-0.61	-0.1	0.14	0.7	0.27	0.06	NA	NA	-0.28	0.4	-0.12	0.68	0.01	NA	0	0.16	NA	0.05	NA	0.22	-0.05	NA	NA	0.46	1.07
ARL6IP4	0.73	0.3	0.355	0.07	0.2	-0.05	0.34	0.18	0.045	0.275	0.255	0.125	-0.11	0.03	0.185	0	-0.05	0.085	-0.12	0.125	-0.13	-0.015	-0.15	-0.07	-0.08	-0.215	0.045	0.29	0.175	0.075	0.735	-0.15	-0.185	0.15	-0.08	0.405	0.165	0.045	0.03	-0.095	-0.005	0.17	0.12	0.18	0.1	-0.175	0.015	-0.175	0.185
ARL6IP5	0.6	0.23	0.22	0.5	-0.74	-0.47	-0.09	0.73	-1.14	0.31	-1.13	-0.85	-0.12	-0.95	-0.33	-0.55	-1.58	-0.51	0.67	-0.07	0.67	-0.98	-0.26	-0.41	0.32	0.29	0.29	0.71	0.25	0.28	0.02	0.63	0.08	0.31	-0.21	-0.01	0.03	0.31	-0.76	-0.46	0.01	-0.76	-0.31	0.31	0.73	-1.3	0.2	0.31	0.19
ARL6IP6	-0.16	-0.23	-0.2	-0.02	-0.23	-0.12	-0.13	0.19	-0.51	-0.36	-0.17	-0.33	0.11	-0.33	0.16	0.04	-0.32	-0.24	0.21	-0.43	0.06	-0.24	-0.05	-0.19	0.02	-0.04	-0.12	-0.02	-0.17	-0.17	-0.19	0.38	0.11	-0.19	-0.2	-0.16	-0.54	0.07	-0.45	-0.28	-0.43	-0.37	-0.5	-0.21	0.29	-0.15	-0.11	0.18	-0.15
ARL8B	NA	0.3	0.7	0.63	-1.45	0.24	0.17	0.91	0.08	-0.22	-0.23	0.07	-0.02	-0.49	0.56	-1.01	-0.41	-0.12	0.66	NA	0.42	-0.43	0.08	NA	0.77	-0.04	0.09	0.78	0.12	0.33	0.99	1.66	0.78	0.12	0.28	0.05	-0.12	-0.04	-0.31	0.05	1.29	0.01	NA	NA	0.4	NA	NA	NA	0.04
ARMC1	-0.77	0.01	-0.41	0.23	-0.25	-0.38	0.06	0.15	-0.23	-0.1	-0.08	0.12	0.08	-0.02	0.54	-0.05	0.02	-0.07	0.16	-0.23	0.05	0.3	0.11	-0.12	0.03	0.2	0.21	0.05	-0.06	0.09	0.31	-0.1	0.42	-0.03	-0.27	0.18	-0.16	0.36	-0.07	-0.05	-0.23	-0.1	-0.67	0.22	0.6	-0.36	0.36	NA	0.07
ARMC10	-0.125	0.09	0.095	0.1	-0.11	-0.405	0.095	-0.015	-0.405	0.155	-0.035	-0.095	-0.045	-0.39	-0.035	-0.52	-0.37	-0.12	0.32	-0.505	0.26	0.125	0.115	-0.48	0.265	-0.175	0.07	0.665	0.03	-0.025	-0.055	0.255	0	0.08	-0.18	0.185	0.065	0.045	-0.315	-0.085	-0.565	-0.075	-0.365	0.22	0.235	0.305	0.035	0.135	-0.005
ARMC2	0.88	0	0.18	0.22	-0.57	0.08	-0.29	0.19	-0.16	-0.06	0.07	0.29	0.44	-0.26	0.04	0.15	-0.15	-0.14	0.23	0.65	0.01	-0.28	0.2	0.25	-0.01	-0.04	-0.32	-0.28	0.13	-0.07	-0.37	-0.13	0.2	-0.16	0.01	0.1	0.3	-0.16	-0.46	-0.13	-0.45	-0.09	0.24	0.26	-0.31	0.06	-0.01	0.79	-0.4
ARMC4	0.575	-0.185	0.13	-0.18	-0.565	-0.545	0.205	-0.58	-0.705	0.31	-0.03	-0.24	-0.09	-0.17	-0.24	-0.075	-0.285	0.01	0.195	-0.64	0.035	-0.45	-0.915	-0.96	0.41	-0.2	-0.15	0.145	0.055	-0.195	-0.125	0.11	-0.095	-0.1	-0.065	-0.085	-0.035	0.125	-0.02	0.015	-0.71	0.18	-0.27	0.275	0.6	0.85	0.92	0.695	-0.72
ARMC5	-0.43	-0.28	-0.395	-0.395	-0.53	-0.19	-0.435	-0.475	0.23	-0.425	-0.26	-0.25	-0.155	-0.315	-0.29	0.86	0.015	-0.15	-0.565	-0.37	-0.745	0.115	0.06	-0.105	-0.7	-0.41	-0.625	-1.095	-0.475	-0.425	0.01	-0.64	-0.52	-0.555	-0.205	-0.59	-0.325	-0.635	-0.325	-0.675	-0.275	-0.44	-0.035	-0.625	-0.695	-0.58	-0.455	-0.325	-0.28
ARMC6	0.23	-0.08	0.05	0.1	0.33	0.08	-0.28	0.06	0.08	-0.27	-0.14	-0.01	-0.27	0.04	0	-0.75	0	-0.22	-0.01	0.12	0.2	0.01	-0.03	0.03	0.23	0.08	-0.33	-0.25	-0.23	-0.1	-0.07	-1.4	0.45	-0.25	0.07	-0.46	-0.21	-0.06	-0.09	-0.15	-0.31	-0.16	-0.17	-0.14	0.23	0.14	-0.28	0.45	0.01
ARMC7	0.295	-0.02	0.15	0.29	-0.135	0.19	-0.02	0.21	0.255	0.05	0.11	0.035	-0.15	0	0.24	0.125	0.255	0.03	-0.38	-0.11	-0.21	0.105	-0.29	-0.04	-0.25	-0.17	0.02	-0.23	-0.05	-0.105	0.525	0.215	0.045	-0.045	-0.055	-0.2	-0.255	0.055	-0.005	-0.115	-0.13	0.015	0.215	-0.085	0.165	-0.06	-0.085	-0.59	-0.32
ARMC8	-0.495	-0.0575	-0.12	0.15	-0.165	-0.165	0.04	-0.005	0.0225	-0.0875	-0.0575	-0.1475	-0.21	0.0025	0.2875	-0.05	-0.13	-0.1	-4.34e-18	-0.0375	-0.0025	0.025	-0.2325	-0.055	-0.03	-0.085	-0.005	0.1575	0.0125	0.0125	-0.0825	-0.2125	-0.0025	-0.0225	-0.06	0.255	0	-0.0675	-0.06	0.01	-0.1425	-0.0025	-0.11	0.035	-0.0175	-0.1975	0.0675	0.0366667	-0.1425
ARMC9	0.255	0.115	-0.26	0.28	-0.215	-0.065	0.25	-0.035	0.035	0.2	0.16	0.06	-0.355	0.355	-0.17	0.265	0.395	0.25	-0.26	-0.18	-0.6	0.295	0.075	-0.025	-0.325	0.035	0.225	0.09	-0.035	0.105	-0.115	-0.13	-0.08	-0.16	-0.07	-0.01	-0.12	-0.16	0.13	0.2	-0.32	0.09	-0.32	0.11	-0.435	0.655	NA	0.28	-0.3
ARMCX1	-0.38	-0.15	0.25	0.34	-0.42	0.24	0.02	0.38	0.36	0.07	0.27	0.41	-0.38	0.19	0.3	0.15	0.13	0.27	-0.45	-0.26	-0.12	-0.06	-0.43	-0.07	-0.41	-0.23	0.26	0.24	0.24	0.23	-0.02	0.41	-0.08	0.04	0.03	-0.26	0.05	0.11	0.16	0.6	0.52	0.15	-0.1	0.19	0.44	0.34	0.96	NA	NA
ARMCX2	0.9	-0.15	-0.18	0.48	0.25	-0.16	-0.06	0.13	-0.52	-0.25	-0.26	-0.24	-1.02	-0.21	0.88	0.05	-0.57	-0.35	0.02	-1.36	-0.11	-0.2	-0.45	-0.56	-0.04	-0.11	-0.21	-0.07	-0.14	-0.28	0.16	-0.46	-0.42	-0.17	-0.37	-0.24	-0.63	0.44	-0.36	-0.18	0.6	-0.24	-0.75	-0.05	0.89	-0.87	-0.53	NA	0.09
ARMCX3	-0.48	-0.1	-0.05	0.26	0.13	-0.31	-0.04	0.14	-0.79	-0.13	-0.09	0.04	0.08	-0.58	0.29	-1.01	-0.72	-0.21	0.24	0.32	0.28	-0.13	-0.09	-0.11	0.28	0.17	-0.08	0.2	0.03	0.11	-0.24	0.62	0.55	-0.09	-0.32	0.19	0.1	0.21	-0.4	-0.31	0.57	-0.1	-0.27	0.16	0.76	0.2	0.6	NA	-0.25
ARMCX4	0.53	-0.19	-0.21	-0.11	-0.8	0.03	-0.42	-0.32	0.09	-0.14	-0.21	0.12	-0.16	-0.36	-0.31	0.9	0.1	0.02	-0.53	-0.42	-0.65	0.04	0.07	0.19	-0.66	-0.41	-0.44	-0.79	-0.06	-0.32	0.05	-0.36	-0.39	-0.25	-0.26	-0.31	-0.18	-0.47	-0.45	-0.66	-0.34	-0.06	0	-0.26	-0.42	-0.55	-0.24	-0.19	-0.03
ARMCX5	NA	0.23	NA	NA	0.48	NA	0.34	NA	-0.42	0.11	-0.2	-0.09	NA	-0.03	NA	-1.15	-0.46	0.24	NA	NA	NA	-0.43	-0.17	NA	NA	-0.74	0.31	0.6	0.18	-0.26	0.11	NA	NA	0	-0.06	0.63	0.49	1.43	-0.06	1.15	NA	NA	0.32	0.04	0.74	NA	NA	NA	NA
ARMCX6	-0.81	-0.65	-0.19	-0.58	-0.1	-0.47	-0.57	-0.49	-0.45	-0.55	-0.56	-0.31	-0.23	-0.09	-0.45	-0.14	-0.27	-0.64	-0.58	-0.22	-0.22	-0.41	-0.3	-0.63	-0.25	-0.44	-0.34	-0.26	-0.28	-0.36	-0.16	-0.16	0.04	-0.25	-0.57	-0.42	-0.41	-0.2	-0.38	0.25	-0.17	-0.28	-0.27	-0.29	-0.14	-0.44	-0.33	-0.38	-0.28
ARMET	0.43	0.26	0.58	-0.86	-0.14	-0.48	NA	0.24	-0.72	0.47	0.08	-0.28	-0.65	-0.46	-0.09	-0.58	-0.78	-0.09	0.23	0.12	0.42	-0.07	0.11	-0.64	0.1	0.16	0.01	0.73	0.21	0.7	-0.62	0.22	-0.17	0.17	-0.4	0.41	0.11	0.25	-0.09	-0.21	0.17	0.56	-0.15	0.17	0.19	1.34	0.15	-0.36	0.24
ARNT	-0.39	-0.03	-0.07	0.03	0.13	0.18	-0.12	-0.05	0.16	-0.15	0.12	0.15	-0.25	0.13	-0.06	-0.16	0.05	-0.03	-0.09	-0.26	-0.07	-0.03	-0.08	-0.44	0.18	-0.1	0.01	-0.21	-0.12	-0.02	-0.03	-0.19	-0.15	-0.26	-0.12	0.04	0.03	-0.09	0.15	0.09	0.25	-0.09	0.23	-0.04	-0.93	-0.27	0.39	NA	-0.5
ARNT2	1.04	-0.01	0.21	0.14	1.2	-0.19	0.26	0.12	0.15	-0.03	0.15	0.06	0.17	0.12	-0.12	0.23	0.3	0.06	-0.12	0.39	-0.29	0.34	0.12	-0.16	-0.15	-0.09	0.23	0	0.28	0.02	0.12	-0.07	-0.24	0.07	0	0.04	0.13	0.06	0.3	0.27	-0.17	-0.04	-0.1	-0.01	-0.11	NA	-0.11	-0.23	-0.17
ARNTL	-0.02	0.04	-0.08	0.295	-0.065	-0.09	-0.14	0.09	-0.13	-0.045	0	0.07	0.16	-0.29	0.04	-0.23	-0.36	0.175	0.34	-0.22	-0.035	0.11	0.32	-0.19	-0.095	0.115	-0.12	0.155	0	0	-0.19	0.55	-0.01	0.1	0.2	-0.31	-0.13	0.02	-0.26	-0.395	0	-0.05	-0.175	0.135	0.15	-0.075	-0.495	0.24	0.015
ARNTL2	-0.3	-0.04	0.11	-0.19	0.06	0.13	NA	0.17	-0.14	-0.14	0.26	0.14	-0.2	-0.28	0.08	0.06	-0.1	-0.12	0.12	0	-0.24	0.19	0.24	-0.14	-0.37	-0.04	-0.18	-0.49	0.05	-0.09	-0.57	-0.18	-0.36	-0.25	-0.23	-0.18	-0.01	-0.38	-0.21	-0.5	-0.04	-0.27	0.19	0.12	-0.38	0.07	0.41	-0.33	-0.2
ARPC1A	-0.8	-0.3	0.04	-0.08	-0.68	-0.77	-0.29	-0.32	-0.1	-0.12	-0.13	-0.33	-0.68	-0.3	0.12	0.38	-0.07	-0.13	0.11	-0.29	-0.36	-0.52	-0.09	0.27	NA	0.05	-0.34	-0.39	-0.25	-0.35	-0.3	-0.24	-0.68	-0.29	-0.01	-0.41	-0.09	-0.28	-0.31	-0.32	-0.19	-0.33	-0.37	-0.36	-0.52	-0.18	-0.15	-1.75	-0.3
ARPC1B	-0.26	-0.01	0.09	-0.34	-0.23	-0.72	0.28	-0.15	-1.11	0.31	0.11	-0.04	-0.5	-0.49	-0.34	-0.04	-0.71	-0.21	0.24	-0.31	0.32	-0.7	-0.05	-0.28	-0.06	-0.1	0.31	0.56	-0.05	0.22	-0.39	-0.45	-0.22	0.27	-0.43	-0.07	0.1	0.19	-0.48	-0.08	-0.04	0.35	-0.41	0.09	0	0.17	-0.09	-0.32	0.06
ARPC2	0.2	-0.385	0.13	-0.27	-0.735	-0.465	-0.34	-0.095	-1.19	-0.18	-0.465	-0.34	-0.2	-0.88	-0.255	0.01	-1.12	-0.49	0.05	-0.13	0.08	-0.48	-0.39	-0.47	-0.31	-0.51	-0.275	0.095	-0.155	-0.115	-0.29	-0.11	-0.24	-0.14	-0.88	-0.19	-0.005	-0.045	-0.73	-0.47	-0.205	-0.175	-0.455	-0.005	0.225	-0.44	0.095	-0.145	-0.23
ARPC3	0.05	-0.08	0.48	-0.22	-0.27	-0.2	-0.05	0.03	-1.35	0.04	-0.14	-0.2	-0.32	-0.76	-0.35	-0.3	-0.91	-0.55	0.31	-0.22	0.36	-0.01	-1.07	-1.03	-0.46	-0.7	0.01	0.5	-0.22	0.13	0.02	0.04	0.13	-0.15	-0.79	-0.31	-0.01	0.46	-0.59	-0.23	0.09	0.29	-0.72	-0.12	0.71	1.01	0.58	0.19	0.58
ARPC4	0.35	-0.06	0.175	0.185	-0.18	0.14	-0.13	0.15	-0.09	0	0.025	0.03	-0.085	-0.025	0.25	-0.17	0.01	-0.055	0.005	-0.28	-0.155	0.415	-0.145	0.135	-0.14	-0.08	-0.15	0.005	0.04	-0.055	0.2	0.22	0.12	-0.08	-0.015	-0.13	-0.075	0.16	-0.055	-0.06	-0.085	-0.14	0.36	-0.03	0.27	0.145	0.305	0.1	-0.195
ARPC5	-0.43	-0.17	0.01	-0.06	-0.27	-0.77	-0.14	0.35	-1	-0.37	-1.08	-0.84	-0.38	-0.61	-0.19	-0.42	-1.01	-0.71	0.47	0.05	0.08	-0.81	-0.28	-0.21	0.04	-0.31	0.08	0.24	-0.12	0.05	-0.11	0.21	0.08	0.29	-0.39	-0.29	-0.42	-0.08	-0.61	-0.53	0.12	-0.99	-0.31	-0.11	0.26	-0.33	0.03	0.66	0.31
ARPC5L	-0.28	-0.21	0.39	0.09	0.36	-0.16	-0.16	0.15	-0.25	NA	-0.31	-0.05	-0.19	-0.05	0.08	-0.29	-0.2	-0.19	-0.15	0.35	0.32	-0.04	-0.15	-0.08	-0.01	0.13	0	0.1	0.09	-0.11	0.18	0.25	-0.02	-0.14	-0.17	-0.07	-0.16	0.13	0.05	0.07	0.05	-0.12	-0.59	-0.18	0.52	-0.04	0.38	-0.46	0.1
ARR3	0.77	-0.34	0.17	0.15	0.13	0.37	-0.66	0.18	-0.01	-0.14	-0.43	-0.15	0.64	0.18	0.19	0.02	0.12	-0.34	0.24	0.5	0.07	0.07	0.32	0.6	0.14	0.45	-0.05	-0.68	0.06	-0.13	0.25	1.22	0.2	-0.54	0.01	-0.75	0.2	0.23	-0.5	-1.13	0	-0.71	0.36	0.29	0.22	-0.18	-0.05	1.28	0.47
ARRB1	-0.345	-0.325	-0.135	-0.25	0.11	-0.28	-0.19	-0.355	0	-0.39	-0.1	-0.17	-0.255	-0.22	-0.19	0.13	0.07	-0.225	-0.645	0.02	-0.905	0.33	-0.12	0.135	-0.89	-0.505	-0.435	-0.715	-0.4	-0.405	-0.205	-0.295	-0.18	-0.5	-0.5	-0.42	-0.345	-0.425	-0.345	-0.57	0.1	-0.315	-0.02	-0.605	-0.51	-0.42	-0.425	-0.3	-0.025
ARRB2	-0.68	-0.37	-0.35	0.3	-0.38	0.27	-0.41	0.23	0.11	-0.3	-0.28	-0.29	-0.51	-0.26	0.09	0.14	0.02	-0.25	-0.41	-0.11	-0.65	-0.41	-0.56	0.29	-0.63	-0.52	-0.27	-0.48	-0.3	-0.4	-0.09	-0.13	-0.32	-0.53	0.01	-0.55	-0.33	-0.25	-0.18	-0.46	-0.32	-0.52	-0.21	-0.33	-0.1	-0.55	-0.16	0.4	-0.03
ARRDC1	0.54	-0.25	-0.33	-0.22	-0.28	-0.02	-0.53	-0.42	0.12	-0.34	-0.25	-0.24	-0.16	-0.26	-0.32	0.43	-0.03	-0.1	-0.44	-0.28	-0.35	-0.07	-0.08	0.05	-0.64	-0.48	-0.46	-0.74	-0.31	-0.39	0.12	0.19	-0.03	-0.28	-0.14	-0.34	-0.41	-0.42	-0.32	-0.45	-0.42	-0.29	-0.16	-0.49	-0.39	-0.58	-0.64	-0.29	-0.18
ARRDC2	0.32	-0.08	-0.24	0.05	-0.47	0.29	-0.17	-0.19	0.31	-0.12	-0.05	-0.01	0.13	-0.04	0	0.61	0.23	0.13	-0.22	-0.29	-0.42	0.04	0.03	0.13	-0.39	-0.09	-0.13	-0.6	-0.22	-0.08	-0.03	-0.34	-0.11	-0.27	0.16	-0.3	-0.33	-0.35	-0.07	-0.36	-0.06	-0.2	0.11	-0.12	-0.22	-0.62	-0.43	-0.16	-0.19
ARRDC3	-0.71	0.04	-0.26	-0.53	0.08	-0.02	0.06	-0.34	0.12	0.14	-0.28	-0.14	0.12	0.08	-0.26	-0.12	0.02	-0.27	0.24	0	-0.13	0.05	0.17	0.22	0	-0.13	-0.25	-0.22	0.12	-0.19	-0.38	-0.33	-0.05	-0.09	-0.1	-0.07	-0.07	-0.34	0.01	-0.11	0.4	-0.05	0.02	0.13	-1.14	0.5	0.35	-0.14	-0.17
ARRDC4	-0.11	-0.09	0.21	-0.02	-0.17	-0.14	-0.38	-0.07	-0.04	-0.36	-0.34	-0.33	0.03	-0.13	-0.29	-0.68	-0.21	-0.19	0.04	0.53	0.53	-0.53	0.06	-0.38	0.66	0.24	-0.4	-0.33	-0.2	-0.28	0.29	0.92	0.36	0.01	0.22	-0.28	0.25	-0.37	-0.03	-0.2	-0.03	-0.19	-0.12	0.11	0.3	-0.35	0.3	0.95	NA
ARSA	0.07	-0.01	0.1	0.56	0.58	0.86	-0.12	0.41	0.5	-0.09	-0.05	0.09	0.19	0.32	0.66	-0.81	0.4	0.13	-0.09	0.79	0.08	0.78	0.31	0.66	0.07	0.24	-0.04	-0.5	-0.17	-0.22	0.4	0.87	0.69	-0.16	0.44	-0.17	0.33	-0.03	0.26	-0.34	-0.06	-0.32	0.47	-0.01	0.13	-0.27	-0.11	0.67	0.25
ARSB	-0.203333	-0.273333	-0.26	-0.143333	-0.176667	-0.0433333	-0.253333	-0.103333	-0.103333	-0.276667	-0.143333	-0.09	0.116667	-0.126667	-0.113333	0.186667	0.0133333	-0.196667	-0.116667	-0.12	-0.383333	-0.0733333	-0.06	-0.0233333	-0.353333	-0.163333	-0.253333	-0.38	-0.11	-0.103333	0.01	-0.336667	-0.253333	-0.453333	-0.143333	-0.326667	-0.156667	-0.383333	-0.143333	-0.22	-0.386667	-0.25	-0.0733333	-0.243333	-0.28	-0.223333	-0.106667	0.326667	-0.00666667
ARSD	0.34	-0.12	0.11	0.21	-0.04	0.02	0.07	0.09	0.035	0.205	0.135	-0.115	-0.305	0.035	0.055	-0.055	0.09	-0.095	-0.18	0.195	-0.31	-0.07	-0.435	0.125	-0.305	-0.335	0.165	0.24	-0.09	0.005	-0.07	-0.025	0.385	0.045	0.13	-0.085	-0.02	0.235	0.065	-0.015	-0.07	-0.05	0.065	-0.11	0.025	0.145	-0.18	0.125	0.145
ARSE	-0.04	-0.12	0.09	0.07	-0.22	0.2	0.08	0.08	-0.04	0	0.04	0.04	0.02	-0.12	0.22	-0.1	-0.23	0.04	-0.1	-0.1	0.27	-0.4	-0.25	-0.14	-0.05	-0.26	0	0.44	0	-0.02	0	-0.25	-0.02	0.27	-0.07	0.29	-0.01	0.2	0.1	0.3	-0.05	0.17	-0.15	-0.1	0.27	0.26	0.19	0	-0.07
ARSG	0.1	-0.155	-0.01	0.06	0.165	-0.12	0.045	0.09	0.035	0.06	0.025	-0.16	-0.25	0.045	-0.06	0.05	0.12	-0.055	-0.14	0.13	-0.175	-0.06	-0.235	-0.03	-0.205	-0.275	0.065	-0.065	-0.11	-0.065	-0.405	-0.175	0.015	-0.145	0.14	-0.075	-0.055	-0.11	0.11	0.085	-0.02	-0.1	0.04	-0.105	-0.175	-0.155	-0.05	-0.125	0.205
ARSJ	NA	0.01	NA	0.96	0.15	0.41	0.19	NA	0.48	0.03	0.17	0.07	-0.57	0.06	0.69	NA	0.34	0.09	-1.15	NA	NA	0.47	-0.12	-0.05	-0.65	0.03	0.24	-0.02	-0.11	0.19	-0.07	0.77	-0.26	-0.08	0.06	0.16	-0.21	0.15	-0.13	-0.17	NA	0.04	NA	0.14	NA	0.51	NA	NA	1.8
ART1	-0.33	-0.01	NA	0.4	-0.42	0.57	0.17	0.56	0.34	0.22	0.15	0.23	-0.76	0.36	-0.1	-0.03	0.47	0.31	-0.2	-0.8	-0.45	0.04	0.02	0.82	-0.19	-0.13	0.17	-0.21	0.08	0.05	0.11	-0.09	0.65	-0.04	0.09	0.3	0.1	0.46	0.46	0.45	0.42	0.32	0.03	-0.2	NA	0.05	NA	0.36	-0.02
ART3	-0.29	-0.29	-0.11	-0.07	0.14	0.06	-0.17	0.16	-0.13	0.06	-0.13	-0.36	-0.42	-0.1	0.01	0.22	-0.22	-0.22	-0.24	-0.23	-0.38	-0.3	-0.58	-0.26	-0.44	-0.32	-0.33	-0.21	-0.31	-0.11	-0.31	-0.5	-0.67	-0.41	-0.13	-0.6	0.05	-0.42	-0.24	0.05	-0.18	-0.23	-0.29	-0.33	-0.45	-0.45	-0.32	-0.3	-0.35
ART4	-0.39	-0.28	-0.29	-0.12	-0.45	-0.06	-0.48	-0.01	-0.44	-0.51	-0.42	-0.22	-0.37	0.1	-0.4	-0.26	0.12	-0.48	-0.25	0.3	-0.1	0.26	-0.41	-0.14	0.02	-0.13	-0.41	-0.05	-0.21	-0.23	0.17	0.27	0.25	-0.31	-0.23	-0.06	-0.12	0.25	0.17	0.9	0.2	-0.19	-0.53	0.06	0.45	0.21	-0.23	NA	0.11
ARTN	0.39	0.26	0.18	-0.01	0.31	0.18	0.09	0.3	0.67	0.18	0.22	0.03	-0.2	0.24	0.14	0.41	0.74	0.16	-0.33	0.25	-0.71	0.1	-0.04	0.22	-0.62	-0.28	0.11	-0.4	-0.1	0.02	-0.27	-0.21	-0.24	-0.12	0.45	-0.3	0.17	-0.2	0.45	0.21	0.1	-0.06	0.41	-0.12	-0.53	-0.56	-0.59	-0.19	-0.15
ARV1	0.605	-0.08	0.03	0.145	-0.575	-0.68	-0.095	-0.38	-0.385	-0.045	-0.41	-0.265	-0.115	-0.425	-0.15	0.15	-0.695	-0.17	0.06	-0.345	0.43	-0.615	-0.34	-0.385	-0.08	0.2	-0.125	-0.025	-0.03	-0.01	-0.19	-0.14	-0.425	-0.065	-0.165	0.115	-0.005	0.06	-0.085	-0.155	-0.395	-0.055	-0.44	0.29	-0.34	-0.54	0.19	-0.78	-0.265
ARVCF	0.47	-0.25	0.23	0.05	0.82	-0.19	-0.12	0	NA	NA	NA	0.84	-0.1	-0.29	-0.19	-0.43	NA	NA	-0.12	0.32	-0.05	0.4	-0.19	-0.46	0.11	0.01	NA	0.87	NA	0.35	0.19	0.1	-0.06	0.76	NA	-0.42	0.18	0.14	-1.19	-0.42	-0.66	0.55	0.02	NA	0.68	-0.23	0.04	-0.44	-0.09
AS3MT	0.32	-0.025	0.19	-0.015	0.425	-0.07	0.155	0.17	-0.02	-0.065	-0.02	-0.03	0.13	-0.005	0.04	-0.395	-0.08	-0.05	-0.15	0.69	0.045	0.215	0.165	0.505	-0.055	-0.02	0.14	0.185	0.155	0.04	0.04	0.155	0.14	-0.01	-0.14	0.085	-0.22	-0.06	0.005	-0.065	0.08	-0.065	0.225	0.27	0.18	-0.275	0.15	0.125	-0.025
ASAH1	-0.495	0.005	-0.105	0.445	-0.23	-0.245	0.06	0.445	-0.61	-0.345	-0.475	-0.245	-0.335	-0.595	-0.045	-0.315	-0.37	-0.2	0.17	-0.195	0.125	-0.48	-0.22	-0.435	0.06	-0.525	0.405	0.655	0.085	0.27	-0.045	0.24	0.475	0.32	-0.07	0.12	0.075	0.435	-0.375	-0.225	0.11	-0.38	-0.15	0.15	0.44	0.195	-0.41	-0.055	0.425
ASAH2	-0.21	-0.08	0.03	-0.03	-0.14	0.09	-0.01	-0.22	0.26	-0.07	-0.01	-0.02	-0.32	-0.09	-0.12	0.21	-0.05	-0.02	-0.14	-0.17	0.04	0.08	0	-0.63	-0.17	-0.15	0.06	0.04	-0.06	-0.12	-0.56	-0.55	-0.24	0.01	0	-0.17	-0.18	-0.34	-0.08	-0.05	-0.06	0.04	-0.04	-0.04	-0.62	-0.4	-0.24	-0.31	0.16
ASAH3	-0.18	-0.36	-0.52	-0.31	0.3	-0.09	-0.35	-0.31	-0.33	-0.22	-0.17	-0.28	-0.3	0.11	0.08	-0.44	-0.27	-0.4	-0.17	-0.07	-0.29	-0.41	-0.16	-0.25	-0.13	-0.21	-0.27	-0.4	-0.2	-0.24	-0.35	0.3	0.36	-0.7	-0.35	-0.92	-0.02	0.12	-0.13	-0.16	-0.46	-0.5	0.11	-0.12	0.23	-0.35	0.1	0.16	-0.23
ASAHL	-0.09	0.1	0.01	-0.04	0.01	0.25	-0.25	0.04	0.07	-0.05	-0.22	-0.11	0.02	0.29	0.01	0.29	0.2	-0.07	-0.11	0.19	0.14	-0.26	0.02	-0.15	-0.06	0	-0.13	-0.29	-0.22	-0.23	0.06	0.13	-0.21	-0.29	0.24	-0.32	-0.17	0.11	0.04	-0.14	0.11	-0.12	-0.19	-0.15	0.12	-0.35	-0.35	-0.86	-0.27
ASB1	-0.12	-0.075	-0.275	0.1	0.07	0.66	0.025	-0.45	-0.015	-0.035	-0.245	0.08	0.07	0.135	-0.43	0.33	-0.065	-0.055	-0.025	-0.27	0.28	-0.31	-0.02	0.2	0.47	0.12	-0.09	0.05	0.005	0.045	-0.18	-0.995	-0.24	0.07	-0.025	0.055	-0.04	-0.54	0.085	-0.07	-0.35	-0.12	0.035	0.18	-0.24	0.27	0.19	0.31	-0.415
ASB13	0.35	-0.125	-0.26	-0.08	-0.19	-0.055	0.09	-0.02	0.125	-0.035	0.07	0	0.115	0.1	-0.09	0.045	0.08	-0.04	-0.075	-0.335	0.035	-0.135	0.13	-0.23	0.215	0.01	0.11	0.135	0.09	-0.005	0.31	-0.155	-0.035	0.03	0.19	0.12	-0.135	0.115	0.055	-0.03	-0.015	-0.02	-0.015	-0.1	0.18	-0.09	0.025	0.3	-0.09
ASB16	-0.08	-0.11	0.34	0.09	0.32	0.25	-0.37	-0.13	0.33	-0.27	-0.18	-0.13	-0.19	0.19	-0.03	0.26	0.19	0.01	-0.06	-0.25	-0.34	0.23	0.03	0.05	0.04	0.12	-0.16	-0.44	0.04	0.01	-0.1	0.31	0.1	-0.19	0.17	0.04	0.21	-0.11	-0.11	-0.16	0.24	-0.11	0.7	-0.51	0.22	0.38	-0.11	0.98	0.62
ASB2	-0.12	0	0.09	-0.03	-0.55	0.19	0.02	-0.1	0.3	-0.06	-0.06	0.13	-0.16	0.33	-0.38	-0.23	0.45	0	-0.23	-0.09	-0.02	-0.36	-0.41	0.09	0.34	-0.2	-0.05	0.03	-0.04	0.02	0.06	0.12	-0.25	0	0.33	0.1	-0.04	-0.05	0.18	0.2	0.36	0.01	-0.02	NA	-0.31	-0.13	-0.52	-0.21	-0.71
ASB3	0.55	0.25	NA	-0.56	-0.28	-0.74	0.58	-0.8	-0.81	0.29	0.11	-0.25	-0.43	-0.17	-0.2	-0.28	-0.6	0.07	0.7	-0.18	0.7	-0.61	-0.07	-0.12	0.49	0.39	0.31	0.43	0.39	0.31	-0.58	-0.3	0.17	0.21	-0.37	0.38	0.38	0.91	0.02	0.11	0.64	0.33	-0.22	0.37	0.13	-0.77	NA	-0.75	0.44
ASB4	NA	0.2	NA	NA	NA	NA	0.2	NA	0.3	0.16	0.11	0.08	NA	0.12	0.13	NA	0.1	0.01	NA	NA	NA	1.11	NA	NA	-0.48	NA	0.36	0.23	0.02	0.19	0.42	0.69	NA	0.16	-0.08	0.48	-0.03	1.08	-0.04	0.29	NA	0.11	NA	0.23	NA	1.17	NA	NA	NA
ASB6	-0.055	-0.3	-0.095	-0.295	-0.495	-0.2	-0.325	-0.27	-0.3	-0.25	-0.425	-0.405	-0.12	-0.325	-0.175	0.49	-0.23	-0.33	-0.32	-0.415	-0.32	-0.09	-0.01	-0.22	-0.375	-0.11	-0.475	-0.27	-0.245	-0.285	-0.195	-0.3	-0.465	-0.335	-0.305	-0.255	-0.345	-0.53	-0.465	-0.44	-0.04	-0.4	-0.11	-0.35	-0.235	-0.67	-0.83	-0.29	-0.32
ASB7	-0.42	-0.04	NA	0.07	0.13	-0.45	0.3	-0.36	-0.09	0.2	0.09	-0.16	-0.65	0.11	-0.49	-0.34	0.03	0.15	-0.13	0.69	-0.26	0.49	-0.09	-0.19	-0.23	-0.14	0.35	0.47	0.25	0.04	-0.26	0.54	-0.1	0.24	-0.05	0.45	0	0.25	0.15	0.18	-0.58	0.17	NA	0.46	NA	0.43	-0.88	NA	0.13
ASB8	0.02	-0.11	0.14	-0.09	-0.05	-0.03	-0.08	0.04	-0.22	-0.06	-0.28	-0.12	-0.11	0	0.08	-0.08	0.26	-0.23	-0.26	-0.12	0	0.12	-0.09	-0.02	-0.34	-0.14	-0.02	0.04	-0.24	-0.09	-0.1	-0.16	0.22	-0.14	-0.21	-0.05	-0.21	0.37	0.15	-0.03	-0.27	-0.07	0.07	-0.12	0.35	-0.31	-0.15	-0.14	-0.16
ASB9	0.06	0.01	0.49	0.17	-0.61	0.53	0.08	0.34	0.54	0.13	0.27	0.19	-0.37	0.3	0.34	0.74	0.59	0.23	-0.54	0.04	-0.88	-0.49	-0.63	0.53	-0.78	-0.59	0.14	-0.37	-0.22	0.04	0.12	-0.65	-0.58	-0.21	0.21	-0.22	-0.06	0.04	0.24	0.04	-0.11	0.02	0.02	0.02	-0.41	-0.07	-0.78	NA	NA
ASCC1	-0.15	0.33	-0.09	0.89	0.05	0.15	0.27	0.32	0.69	0.29	0.46	0.33	0.22	0.37	-0.26	-0.72	0.62	0.36	-0.4	0.75	-0.03	0.65	0.07	0.32	-0.09	0.1	0.28	0.03	-0.19	-0.12	0.29	0.81	0.82	0.07	0.08	0.15	0.22	0.28	0.45	-0.04	-0.1	0.11	0.33	0.09	0.56	-0.28	-0.22	0.9	0.75
ASCC2	-0.01	-0.32	-0.325	0.01	-0.01	0.09	-0.325	-0.195	-0.085	0	-0.255	-0.215	-0.08	-0.16	-0.035	0.64	-0.225	-0.285	-0.24	-0.52	-0.165	-0.245	-0.175	-0.47	-0.165	-0.2	-0.28	-0.205	-0.25	-0.225	-0.095	-0.4	-0.345	-0.435	-0.24	-0.265	-0.195	-0.18	-0.2	-0.275	-0.2	-0.47	-0.2	-0.19	0.035	0.2	0.065	0.215	-0.385
ASCC3	0.435	-0.03	-0.395	0.115	-0.355	-0.05	0.155	-0.045	-0.14	-0.025	0.085	-0.01	-0.025	-0.13	-0.005	0.255	-0.075	0.11	0.035	-0.135	0.075	-0.35	-0.25	0.125	0.05	0.015	-0.05	0.14	0.13	0.1	-0.085	-0.05	-0.16	0.005	-0.035	-0.1	0.14	0.065	0.04	-0.005	-0.445	0.16	0.17	0.17	-0.035	0.09	-0.335	-0.04	-0.47
ASCC3L1	0.613333	-0.236667	0.0766667	-0.22	0.26	-0.203333	-0.153333	-0.24	-0.406667	0.0566667	-0.27	-0.236667	-0.0433333	-0.243333	-0.103333	0.15	-0.326667	-0.296667	-0.0866667	-0.0366667	0.226667	0.166667	-0.0833333	-0.01	0.00333333	-0.00666667	-0.0466667	0.183333	-0.146667	-0.16	0.176667	0.13	-0.11	-0.12	-0.246667	-0.0333333	-0.09	0.0466667	-0.25	-0.05	0.186667	-0.233333	-0.116667	-0.0166667	-0.0666667	0.0233333	0.153333	-0.305	-0.55
ASCL1	0.06	-0.21	-0.1	0.04	0.06	0.22	-0.28	0.01	0.01	-0.44	-0.09	-0.19	0.08	-0.1	0.19	0.26	-0.05	-0.05	-0.38	-0.11	-0.51	-0.04	0.08	0.12	-0.36	-0.23	-0.28	-0.55	-0.21	-0.29	0.15	0.31	-0.15	-0.32	-0.16	-0.36	-0.37	0.05	-0.25	-0.54	-0.03	-0.22	-0.08	-0.36	0.06	-0.22	-0.22	-0.26	-0.13
ASCL2	NA	-0.22	NA	-0.44	-0.67	0.38	-0.27	NA	0.1	0.14	-0.38	-0.1	-0.19	0.28	NA	0.15	0.12	-0.23	-0.62	0.34	-0.29	-0.03	-0.03	0.56	-0.08	NA	0.04	-0.11	0.12	-0.08	-1.03	-0.33	-0.84	0.01	-0.01	0.34	-0.2	-0.69	0.26	0.54	0.3	-0.21	NA	-0.24	NA	NA	0.81	NA	-0.1
ASCL3	-0.04	0.21	0.15	0.6	-0.58	0.63	0.2	0.24	0.94	0.28	0.29	0.47	0.17	0.57	0.23	-0.11	0.73	0.57	-0.22	0.29	-0.71	0.54	0.14	0.6	-0.64	0.05	0.49	0.11	0.13	0.32	0.14	0.12	0.39	0.27	0.53	0.08	-0.02	-0.06	0.34	0.01	0.34	0.28	0.38	0.04	0.36	0.18	0.05	0.01	0.23
ASF1A	0.48	0.08	-0.09	0.14	-0.31	0.135	-0.055	0.15	-0.25	0.02	0.13	-0.085	0.055	-0.075	0.145	-0.415	-0.165	-0.01	0.135	0.315	0.52	0.06	0.11	-0.045	0.39	0.345	0.005	0.26	0.17	0.23	0.045	0.625	0.52	0.235	-0.135	0.03	0.23	0.19	-0.07	-0.275	0.16	0.195	0.155	0.415	0.315	0.01	0.085	0.195	0.17
ASF1B	-0.44	-0.08	-0.05	0.14	-0.36	0.05	0.09	-0.16	0.2	0.11	0.01	0.09	0.05	0.08	0.2	0.34	0.03	-0.01	-0.24	-0.08	-0.25	0.18	-0.03	-0.18	-0.09	-0.16	0.11	0.26	0.02	-0.2	-0.15	-0.32	-0.37	0.14	0.14	0.05	-0.08	-0.04	0.22	0.06	-0.57	-0.09	-0.1	0.07	-0.21	0.08	-0.16	-0.68	-0.09
ASGR1	-0.13	0.21	-0.88	-0.31	-0.28	-0.13	0.15	0.17	-0.21	0.12	0.08	0.1	-0.37	-0.13	0.17	0.66	0.11	-0.05	-0.03	-0.49	-0.25	0.1	0.1	0.13	-0.15	-0.01	-0.01	0.03	-0.04	0.1	-0.36	-0.13	-0.38	0.01	0.04	-0.27	0.04	-0.15	-0.02	-0.25	-0.59	0.11	0.4	0.16	-0.54	-0.7	0.15	-0.86	-0.23
ASGR2	0.54	-0.305	0.365	-0.875	-0.335	-0.01	-0.1	-0.33	-0.02	-0.08	-0.115	-0.21	-0.625	-0.26	-0.52	-0.05	-0.17	-0.245	-0.415	-0.01	-0.12	0.105	-0.07	0.31	-0.405	-0.29	-0.255	-0.27	-0.29	-0.315	-0.135	0.07	-0.23	-0.295	-0.26	-0.315	-0.43	-0.635	-0.21	-0.14	0.35	-0.235	0.175	-0.15	-0.295	-0.69	-0.55	0.06	-0.08
ASH1L	-0.365	-0.01	0.085	0.35	-0.07	0.05	0.57	0.33	-0.27	0.67	0.33	0.06	-0.7	-0.11	0.475	-0.2	-0.505	0.145	-0.505	-0.55	-0.1	-0.6	-0.75	0.15	-0.29	-0.565	0.22	0.61	-0.12	-0.23	0.095	0.3	-0.245	-0.145	-0.18	0.045	-0.05	0.195	-0.125	0.115	0.275	0.285	-0.105	0.125	0.24	-0.51	0.25	0.53	0.36
ASH2L	-0.05	0	-0.13	0.23	0.19	0.26	0.08	-0.02	0.2	-0.16	0.22	0.18	-0.07	0.03	0.46	-0.26	-0.01	-0.01	-0.11	0.34	-0.15	0.21	0.31	0.11	-0.18	-0.12	0.15	0.38	0.05	0.05	0.46	0.16	-0.1	0.03	0.01	0.53	0.16	0.12	-0.09	-0.26	0.07	0.03	-0.19	-0.13	0.18	0.15	0.14	NA	0.24
ASIP	0.25	-0.01	-0.13	0.04	0.28	0.23	-0.13	0.32	0.11	0.07	0.1	0.05	0.08	0	0.24	0.29	-0.04	0.05	-0.1	-0.43	-0.27	0.27	-0.04	-0.1	-0.1	-0.2	0.31	0.25	0.24	0.09	0.19	-0.13	-0.17	0.22	0.09	0.33	-0.02	0.07	-0.07	-0.02	-0.04	0.12	0.27	-0.03	0	-0.34	-0.32	-0.4	-0.01
ASL	0.12	-0.04	-0.095	-0.085	0.12	0.22	0.015	0.11	0.43	-0.1	0.03	0.125	0.03	0.1	0.11	0.265	0.33	0.18	-0.25	0.035	-0.35	0.135	0.025	0.33	-0.315	-0.13	0.06	-0.265	-0.115	-0.04	0.135	0.025	0.09	-0.1	0.225	-0.275	-0.135	-0.115	-0.03	-0.215	-0.005	-0.04	0.135	-0.25	0.065	-0.145	-0.05	-0.145	0.165
ASMT	0.285	-0.035	-0.145	0.105	-0.305	-0.03	0.115	0.08	0.04	0.145	0.15	0.125	0.09	-0.005	0.24	-0.11	0.105	0.155	0.3	-0.08	0.11	-0.04	-0.16	-0.02	0.02	0.08	0.11	0.305	-0.015	0.115	0.08	0.83	0.175	0.115	0.105	0.045	0.065	0.12	0.09	0.005	0.025	0	-0.02	0.03	0.39	0.02	0.42	0.13	-0.055
ASNA1	2.69	0.07	-0.07	0.31	0.2	0.27	0.07	-0.03	0.24	0.2	-0.02	0.04	0.28	0.25	0	-0.32	0.25	0	-0.15	0.34	0.06	0	0.11	0.34	0.11	0.21	-0.16	-0.02	-0.06	0.01	0.06	0.16	0.39	-0.06	0.25	-0.15	0.06	0.36	0.25	0	0.16	0.17	-0.32	-0.16	0.37	0.15	0.02	0.79	0.5
ASNS	-0.09	0.08	0.17	-0.16	-0.3	-0.35	0.26	0.08	-0.35	0.23	-0.15	-0.15	-0.85	-0.08	-0.75	-0.08	0.06	-0.08	-0.27	0.24	0.56	0.15	0.24	-0.72	-0.22	-0.41	0	0.06	-0.23	-0.01	-0.18	0.14	-0.27	-0.03	-0.15	-0.04	0.15	-0.33	0.06	0.02	0.19	0.04	0.71	0.2	-0.36	0.27	0.39	NA	-0.76
ASNSD1	NA	0.04	NA	0.08	-0.91	NA	0.27	0.69	-2.05	-0.17	-0.36	-0.07	NA	-0.88	0.23	NA	-1.15	-0.33	NA	NA	-0.29	NA	NA	NA	0.06	NA	-0.16	0.9	-0.11	-0.2	0.87	0.81	NA	0.37	-0.26	0	0.1	0.08	-0.05	0.23	0.99	0.5	NA	0.39	NA	0.03	-1.27	NA	NA
ASPA	-0.07	0.29	-0.04	0.01	-0.02	-0.15	0.42	0.28	0.79	0.14	0.37	0.51	-0.32	0.25	0.25	0.17	0.47	0.3	-0.01	0.19	-0.38	0.41	-0.15	0.03	-0.21	-0.05	0.3	0.14	0.35	0.16	0.2	-0.39	-0.29	0.15	0.11	0.1	0.01	0.08	0.27	0.03	0.04	0.22	0.46	0.28	-1.53	-0.1	-0.06	-0.24	0.14
ASPH	0.89	0.11	0.35	-0.015	-0.04	-0.3	0.18	0.925	-0.025	0	0.05	0.05	-0.41	0.11	0.13	0.51	0.045	0.045	-0.45	-0.03	-0.305	-0.08	-0.24	-0.375	-0.075	-0.32	0.125	0.27	-0.045	0.005	0.06	0.145	0.34	-0.12	-0.01	-0.075	-0.105	-0.06	0.095	0.23	0.195	0.105	-0.16	0.065	0.18	0.655	-0.3	-0.27	-0.535
ASPHD1	0.26	-0.16	-0.01	-0.04	-0.18	-0.04	-0.17	-0.04	-0.05	-0.16	-0.26	-0.22	-0.38	0.06	-0.33	0.32	-0.01	-0.13	-0.22	-0.56	-0.42	-0.23	-0.55	-0.55	-0.25	-0.36	-0.3	0.08	-0.13	-0.22	-0.15	-0.48	-0.34	-0.32	-0.18	-0.04	-0.08	-0.25	0.09	0.4	-0.49	-0.11	-0.19	-0.35	-0.35	-0.1	-0.18	-0.28	-0.01
ASPHD2	0.22	-0.015	-0.04	0.195	-0.09	-0.015	-0.07	-0.12	-0.29	0.1	-0.155	-0.115	0.085	0.075	-0.145	-0.61	-0.365	-0.19	0.035	0.145	0.31	0.185	0.055	0.09	0.34	0.27	0.05	0.255	-0.055	0.07	0.27	0	0.24	0.105	-0.025	0.15	0.075	0.235	-0.18	-0.355	-0.035	0.035	-0.145	0.175	0.375	0.325	-0.035	0	0.15
ASPM	-0.005	0.00666667	0.2775	0.0175	0.145	0.605	0.0975	0.005	-0.04	0.13	0.0733333	0.115	0.0533333	0.0475	-0.333333	-0.2975	-0.12	0.0925	0.1425	0.08	0.245	0.0325	-0.0733333	0.22	0.22	0.07	0.103333	0.05	0.0133333	0.136667	0.375	-0.0175	0.19	0.0975	0.0625	0.176667	-0.2175	0.085	0.05	0.245	-0.753333	0.0425	0.533333	0.0366667	-0.035	0.326667	0.37	0.35	0.05
ASPN	0.49	0.03	-0.05	-0.26	-0.22	-0.09	-0.01	0.44	-0.3	0.4	-0.2	0	-0.73	-0.02	0.19	0.43	-0.03	-0.13	-0.19	-0.55	0.11	-0.02	-0.34	-0.28	0.01	-0.03	-0.11	-0.33	0.01	-0.02	-0.48	-0.3	-0.28	-0.24	-0.06	-0.36	-0.15	0.08	-0.22	0.39	-0.31	0.02	-0.29	-0.14	0.25	0.69	NA	NA	NA
ASPSCR1	-0.02	-0.11	-0.27	-0.49	0.19	-0.49	-0.06	0.03	0.21	-0.18	-0.32	-0.29	-0.48	-0.19	-0.25	0.7	-0.06	-0.22	-0.25	-0.08	-0.43	-0.06	-0.26	-0.4	-0.37	-0.48	-0.34	-0.35	-0.16	-0.2	-0.2	-0.8	-0.65	-0.13	0.08	-0.43	-0.16	-0.29	-0.08	-0.06	-0.03	-0.27	-0.1	-0.45	-0.49	-0.13	-0.28	-0.32	-0.09
ASRGL1	0.16	-0.18	0.01	0.38	-0.13	0.59	-0.04	0.32	0.58	-0.09	-0.12	-0.17	-0.32	0.04	0.13	0.03	0.35	0.11	-0.4	0.36	-0.7	-0.12	-0.23	0.42	-0.44	-0.36	-0.02	-0.42	-0.33	-0.16	-0.23	0.03	-0.04	-0.15	0.35	-0.35	-0.3	0.12	0.03	-0.22	0.17	-0.14	0.22	-0.14	-0.08	-0.28	-0.11	0.25	0.01
ASS1	-0.26	-0.105	0.115	0.115	0.555	-0.015	-0.065	-0.03	-0.29	-0.07	-0.07	-0.12	-0.155	-0.005	0.02	-0.15	-0.03	-0.225	-0.12	0.195	0.045	0.335	-0.04	-0.13	0.03	0.07	-0.135	0.11	-0.08	-0.29	0.075	-0.165	0.21	-0.195	0.015	0.13	-0.16	0.21	-0.045	-0.14	0.165	-0.005	-0.125	-0.11	-0.16	-0.09	-0.175	0.23	0.025
ASTE1	0.675	0.02	0.18	-0.03	-0.065	0.19	0.2	0.365	-0.03	0.11	-0.04	-0.155	-0.06	-0.02	0.185	0.36	0.035	0.045	-0.155	0.24	-0.25	0.1	-0.13	-0.155	-0.15	-0.225	0.025	0.305	0.05	-0.04	0.075	0.135	0.16	-0.045	-0.035	0.04	-0.035	-0.06	0.085	0.355	-0.075	0.09	0.235	0.065	-0.78	0.085	-0.29	-0.07	-0.14
ASTN1	-0.235	-0.22	-0.28	0.05	0.115	-0.09	-0.055	0.16	0.22	-0.18	-0.31	-0.145	0.08	-0.065	0.305	0.35	-0.03	-0.135	-0.18	-0.87	-0.435	0.09	-0.315	-0.2	-0.175	-0.395	-0.415	-0.705	-0.22	-0.29	-0.605	-0.705	-0.48	-0.31	-0.09	0.02	-0.02	-0.205	-0.09	0.255	-0.34	-0.185	0.26	-0.315	-0.4	-0.135	-0.59	NA	0.13
ASTN2	-0.236667	-0.266667	-0.386667	-0.156667	-0.03	-0.543333	-0.0866667	-0.23	-0.37	-0.21	-0.35	-0.363333	0.0466667	0.226667	0.3	0.08	-0.44	-0.23	0.0433333	-0.14	-0.183333	-0.633333	-0.0866667	-0.56	0.26	-0.25	-0.283333	-0.0866667	-0.323333	-0.24	-0.2	-0.393333	-0.52	-0.233333	-0.193333	-0.166667	-0.436667	-0.216667	-0.23	-0.183333	-0.153333	-0.263333	-0.233333	-0.29	-0.32	-0.19	0.333333	0.03	-0.15
ASXL1	-0.196667	0.0233333	-0.01	0.25	0.11	-0.0866667	-0.1	0.123333	-0.12	0.133333	-0.143333	-0.0266667	-0.123333	0.0433333	-0.103333	-0.07	-0.0233333	-0.0333333	-0.0266667	-0.223333	-0.15	0.0433333	-0.09	-0.14	-0.166667	-0.193333	-0.0666667	-0.13	-0.0433333	-0.186667	-0.00333333	0.02	-0.27	-0.106667	-0.0433333	0.05	0.0433333	-0.166667	0.00666667	-0.156667	-0.17	-0.02	0.26	-0.15	0.206667	-0.26	-0.0766667	-0.115	-0.21
ASXL2	-0.02	-0.45	-0.08	-0.295	-0.45	-0.155	-0.68	-0.31	-0.165	-0.41	-0.52	-0.465	0.075	-0.65	-0.225	0.775	-0.29	-0.335	-0.35	-0.155	-0.655	-0.33	0.09	0.13	-0.57	-0.22	-0.53	-0.84	-0.54	-0.55	-0.265	-0.385	-0.415	-0.595	-0.535	-0.32	-0.345	-0.69	-0.59	-0.75	-0.37	-0.77	-0.09	-0.585	-0.39	-0.835	-0.555	0	-0.22
ASXL3	-0.48	0.015	NA	0.255	0.27	-0.12	0.1	-0.325	-0.205	-0.16	-0.1	-0.12	0.105	0.03	-0.535	-0.18	0	-0.025	0.175	-0.355	0.545	0.075	-0.03	0.25	0.34	0.26	-0.22	-0.06	0.065	-0.195	0.355	0.825	0.685	0.07	0.255	0	0.015	-0.635	0.145	0.09	0.185	-0.355	-0.5	-0.17	1.1	0.62	0.635	NA	-0.31
ATAD1	0.475	0.04	0.37	0.27	0.035	0.125	-0.19	0.15	-0.18	0.235	0.07	0.005	0.63	0.105	-0.135	-0.53	-0.085	-0.015	0.37	0.12	0.435	0.42	0.315	-0.115	0.23	0.505	-0.075	0.05	-0.005	-0.46	0.185	0.505	0.26	0.2	0.02	-0.09	0.175	0.385	-0.06	0.215	0.275	0.055	0.21	0.145	-0.61	-0.4	0.19	NA	0.44
ATAD2	0.275	-0.095	0.2	-0.165	0.275	0.215	-0.05	-0.205	0.21	-0.155	-0.03	-0.015	0.08	0.205	-0.02	-0.33	0.14	0.06	-0.155	-0.185	-0.15	0.32	0.09	-0.145	-0.025	0.22	0.01	-0.205	0.05	-0.165	-0.38	-0.12	0.195	0.075	-0.035	-0.175	-0.16	0.05	0.155	0.02	0.1	-0.01	0.225	0.105	-0.075	0.04	0.37	-0.19	0.29
ATAD2B	-0.5	-0.3	-0.13	-0.16	0.66	-0.44	-0.03	0.32	-0.43	-0.23	-0.28	0	-0.27	-0.05	0.09	-0.55	-0.09	-0.38	-0.11	0.26	-0.35	-0.32	-0.07	0.24	0.01	-0.18	-0.2	-0.09	-0.36	-0.37	0.15	0.15	0.31	-0.3	-0.03	-0.07	-0.08	0.29	-0.03	0.27	-0.45	-0.06	0.09	-0.2	-0.22	0.3	0.19	0.58	-0.09
ATAD3A	-0.64	0.01	0.21	0.52	0.3	0.11	0.24	-0.06	0.3	NA	-0.06	0.14	-0.4	0.05	-0.2	-0.32	0.18	-0.04	-0.72	-0.02	0.16	0.2	-0.21	0.05	-0.27	-0.18	0.33	0.42	0.28	0.26	-0.07	0.49	-0.06	0.43	0.07	-0.06	-0.19	0.19	0.36	0.16	0.09	0.18	-0.39	-0.06	0.05	0.13	0.18	1.3	-0.06
ATAD4	-0.41	-0.02	-0.11	0.19	-0.32	0.05	0.4	0.2	0.56	-0.16	0.19	0.1	-0.31	0.22	0.43	0.54	0.28	0.18	-0.39	0.19	-1.03	0.12	-0.1	-0.33	-0.55	NA	0.45	0.14	-0.07	-0.19	0.37	-0.2	0.1	0.16	0.2	0.11	-0.32	-0.1	0.25	0.11	0.6	-0.13	-0.52	-0.07	-0.32	0.09	0.38	NA	0.28
ATAD5	0.52	-0.3	NA	-0.1	0.59	0.22	0.09	-0.13	0.16	0.19	0.05	-0.06	0.36	-0.12	0.36	0.71	0.24	0	0.24	-0.96	0.15	NA	-0.88	-0.34	0.28	-0.14	-0.13	-0.09	0.12	-0.25	-1.08	0.07	-0.12	-0.21	-0.01	-0.1	0.06	0.11	0.26	0.15	-0.06	0.1	0.29	0.11	1.29	NA	0.95	NA	NA
ATBF1	-0.63	0.04	0.41	0.08	0.21	-0.03	-0.02	-0.25	0.5	0.04	0.3	-0.15	-0.13	0.34	-0.52	-0.64	0.19	-0.14	-0.26	0.5	0.24	0.02	-0.1	0.49	0.09	0.31	-0.14	-0.44	-0.25	0	0.19	-0.31	0.26	0.05	0.19	-0.04	0.31	-0.05	-0.03	0.26	0.11	-0.11	-0.12	-0.08	0.27	-0.08	0.09	NA	0.01
ATCAY	0.51	0.21	-0.13	-0.18	0.33	-0.2	-0.01	0.02	0.15	0.06	0.15	-0.02	-0.12	-0.15	-0.16	0.73	0.15	0.1	-0.08	-0.14	-0.15	0.49	0.31	0.01	-0.05	-0.12	-0.1	-0.36	0.06	-0.09	0.32	-0.42	-0.27	-0.08	0.08	-0.03	-0.12	-0.02	-0.12	-0.3	0.21	-0.01	0.27	-0.14	-0.55	-0.18	-0.19	-0.32	-0.13
ATE1	0.515	-0.11	0.1	0.13	0.155	0.2	-0.225	0.13	0.385	-0.14	-0.055	0.25	0.32	0.065	0.035	0	0.285	0.065	-0.01	0.025	-0.325	0.1	0.3	0.155	-0.11	0.11	0.18	-0.465	0.12	0.125	0.03	0.185	-0.035	-0.22	0.125	-0.025	0.045	-0.175	0.075	-0.495	-0.035	-0.26	0.12	0.12	-0.3	-0.22	-0.27	0.615	0.065
ATF1	-0.33	-0.13	NA	0.18	-1.04	-0.28	-0.08	0.44	0.03	0.28	-0.1	0.3	-0.28	0.2	-0.06	-0.33	-0.06	-0.04	-0.16	-0.1	0.05	-0.35	-0.15	-0.74	0.31	-0.03	0.02	0.49	0.4	0.39	-0.29	0.05	-0.4	0.28	-0.08	0.34	0.09	-0.26	0.02	0.41	0.26	0.04	-1.27	0.07	0.43	0.57	0.26	NA	0.05
ATF2	0.49	0.06	NA	-0.19	-0.2	-0.21	0.28	0.43	0.15	0.2	0.26	0.11	-0.18	0.1	-0.2	-0.18	0.15	0.17	0.12	-0.11	0.06	-0.06	0.11	0.24	0.05	0.12	0.27	0.2	-0.04	0.08	-0.2	0	-0.26	-0.01	-0.13	0.12	-0.01	-0.22	0.18	0.04	-0.65	0.1	-0.52	0.07	NA	0.27	NA	NA	NA
ATF3	0.535	-0.02	0.4	0.275	-0.13	0.185	0.065	-0.07	-0.105	-0.05	0.175	-0.03	-0.085	0	0.125	-0.195	-0.065	0.08	-0.055	-0.155	0.075	0.12	-0.205	0.125	0.04	0.145	0.175	0.315	-0.02	0.105	0.305	0.125	0.17	0.27	-0.035	0.2	0.01	0.235	0.04	0.145	0.16	0.08	0.195	0.095	0.47	0.12	-0.405	0.29	-0.05
ATF4	-0.05	0.23	0.38	-0.14	-0.22	0.08	0.19	0.02	-0.65	0.14	0.25	-0.17	-0.35	-0.41	0.19	-0.15	-0.51	-0.06	-0.24	0.33	0.13	0.01	-0.38	0.24	-0.12	-0.09	0.01	0.49	0.02	-0.36	0.16	0.68	-0.07	0.45	-0.65	-0.16	0.01	0.44	-0.35	0.04	0.44	0.48	0.33	0.25	0.73	0.55	0.27	-0.06	0.2
ATF5	0.465	-0.115	0.17	-0.155	-0.02	-0.085	0.15	-0.365	-0.72	0.045	-0.05	-0.455	-0.105	-0.24	-0.01	0.12	-0.625	-0.115	0.085	-0.19	0.21	-0.265	-0.285	-0.77	0.22	-0.045	-0.35	0.165	-0.07	-0.14	-0.03	0.08	-0.02	-0.22	-0.135	0.095	0.045	0.145	-0.28	-0.23	-0.08	0.015	-0.2	-0.065	-0.25	0.32	0.14	0.385	-0.38
ATF6	0.64	0.13	0.09	-0.18	0.42	-0.49	0.33	0.21	-0.17	0.35	-0.11	0.09	-0.86	0.05	-0.05	-0.82	-0.32	-0.06	0.14	0.5	-0.2	-0.15	-0.42	0.25	-0.05	-0.26	0.71	1.37	0.17	0.73	-0.65	0.36	-0.81	0.47	0.05	0.27	-0.04	-0.04	-0.18	0.44	-0.01	-0.1	-0.08	0.39	0.05	0.29	NA	1.36	-0.21
ATF7	-0.145	-0.29	-0.09	0.05	-0.185	0.275	-0.41	0.22	-0.14	-0.39	-0.18	-0.045	-0.02	-0.255	0.255	-0.275	-0.15	-0.345	-0.3	0.175	-0.71	0.245	-0.085	0.18	-0.88	-0.43	-0.29	-0.525	-0.15	-0.265	0.03	0.11	0.245	-0.39	-0.56	-0.49	-0.14	0.11	-0.445	-0.61	0.03	-0.31	-0.02	-0.15	-0.145	-0.235	-0.155	0.015	0.08
ATF7IP	-0.04	-0.13	0.24	-0.7	-0.245	-0.88	0.1	0.065	0.265	-0.055	0.13	0.05	-0.305	-0.05	-0.66	-0.01	-0.05	0.395	-0.265	-0.185	-0.25	0.025	-0.145	-0.115	-0.18	-0.19	0.355	0.63	0.27	0.395	0.03	-0.27	-0.265	-0.09	0.19	0.37	-0.25	-0.385	0.08	-0.155	0.035	-0.345	0.02	-0.03	-0.37	-0.125	-0.02	-1.01	-0.52
ATF7IP2	0.79	0.3	NA	-0.2	0.26	NA	NA	0.38	0.03	-0.09	0.62	-0.08	-0.4	0.38	-0.28	-0.4	0.11	-0.15	-0.28	0.5	-0.8	-0.08	-0.75	NA	-0.2	-0.7	0.26	0.57	0.36	0.33	NA	0.13	-1.1	0.43	-0.15	0.77	0.22	-0.28	-0.33	-0.17	-0.01	-0.14	1.36	0.6	NA	NA	NA	0.97	-0.13
ATG10	0.065	0.235	0.26	0.3	0.43	0.3	0.24	0.12	-0.17	-0.165	-0.145	-0.085	0.01	-0.235	0.425	0.26	0.145	0.215	0.075	-0.54	-0.15	0.28	0.275	0.135	-0.515	0.04	-0.325	-0.14	0.05	-0.2	0.785	0.245	-0.51	-0.1	0.045	0.21	0.095	0.11	0.205	0.375	0.15	-0.125	0.055	-0.815	1.71	0.36	1.46	-0.13	0.66
ATG12	-0.04	-0.14	0.15	0.265	0.16	0.235	0.12	0.275	-0.145	0.145	-0.075	0.025	-0.23	-0.16	0.01	-0.8	-0.26	-0.12	-0.295	0.025	-0.31	0.005	-0.37	-0.255	-0.325	-0.375	0.22	0.405	-0.025	-0.17	0.235	0.88	0.295	-0.005	-0.06	-0.005	-0.195	0.145	0.015	-0.165	0.285	0.095	-0.09	0.25	0.44	0.33	0.14	-0.335	0.365
ATG16L1	-0.42	0.05	-0.07	0.16	0.31	0.15	0.16	0.42	0.08	0	0.18	0.17	-0.02	0.08	0.1	-0.51	0.12	0.12	-0.23	0.35	-0.62	0.41	-0.16	0.23	-0.42	-0.45	0.4	0.29	-0.1	0.11	0.36	-0.17	0.65	-0.01	-0.13	-0.03	-0.12	-0.07	0	-0.09	0.2	0.07	-0.03	-0.06	-0.15	0.21	-0.42	0.27	-0.09
ATG16L2	-0.14	-0.05	0.145	-0.17	-0.345	-0.215	-0.175	0.005	0.06	-0.075	-0.285	-0.195	0.23	-0.105	0.025	0.275	-0.015	-0.05	0.2	-0.195	-0.115	0.075	0.005	0.145	0.125	0.1	-0.085	-0.015	0.06	-0.005	0.075	0.045	-0.02	0.125	-0.04	-0.055	0.05	-0.23	-0.175	0.085	0.355	-0.205	0.075	-0.165	0.15	-1.175	-0.05	0.505	0.07
ATG3	-0.07	-0.005	0.34	0.15	-0.675	-0.3	0.135	0.345	-0.8	0.005	0.04	-0.22	-0.29	-0.69	-0.355	-0.275	-0.77	-0.24	0.25	-0.165	0.305	-0.315	-0.61	-0.25	-0.12	-0.29	0.035	0.485	0.04	0.295	-0.015	0.02	-0.04	0.26	-0.365	0.125	0.295	-0.115	-0.285	-0.045	-0.16	0.255	-0.235	0.265	0.195	0.48	0.42	-0.215	-0.2
ATG4A	NA	-0.09	0.59	0.22	-0.49	NA	-0.21	0.38	-0.26	0.17	-0.35	-0.06	-0.33	0.31	0.41	-0.49	-0.31	0	0.45	0.35	0.24	-0.18	NA	0.32	0.21	0.08	0.06	0.64	0.15	0.3	0.4	0.02	0.08	0.31	0.19	0.55	0.1	-0.01	0.17	0.29	-0.7	0.05	-0.51	0.24	1.13	0.58	NA	NA	NA
ATG4B	0.025	0.0275	-0.236667	0.04	0.32	-0.045	0.0075	-0.02	-0.04	-0.0125	-0.06	-0.1375	0.06	0.0575	0.0225	-0.265	-0.13	-0.1125	-0.0575	-0.125	0.0175	0.02	-0.12	-0.1475	0.195	0.00666667	0.02	0.0075	-0.055	-0.0525	0.0925	-0.0675	0.0625	-0.0625	0.1025	-0.1025	0.015	-0.0775	0.035	-0.1225	-0.06	-0.025	0.14	-0.06	-0.1775	-0.075	-0.005	0.03	-0.0433333
ATG4C	-0.07	-0.09	0.72	-0.43	-0.39	-1.55	-0.12	-0.09	-1.29	-0.17	-0.52	-0.52	-0.73	-0.63	0.33	0.79	-1.03	-0.13	0.34	0.23	1.09	-0.83	-0.51	0.12	0.36	0.14	0.08	0.09	-0.37	-0.14	-0.68	0.69	-0.12	0.13	-0.19	1.01	0.39	0.14	-0.31	-0.45	-0.5	0.1	NA	0.35	NA	NA	NA	0.71	0.65
ATG4D	0.32	-0.36	-0.33	-0.25	-0.5	-0.06	-0.49	-0.08	0.01	-0.38	-0.33	0.1	-0.27	-0.02	-0.13	0.42	-0.16	-0.14	-0.16	-0.47	-0.11	-0.05	0.17	-0.23	-0.23	-0.16	-0.24	-0.63	0.12	-0.12	-0.4	-0.05	-0.3	-0.37	0.01	-0.34	-0.13	-0.32	-0.28	-0.37	-0.41	-0.23	-0.41	-0.07	-0.68	-0.08	-0.92	0.17	-0.6
ATG5	-0.27	-0.02	NA	0.12	0.04	-0.25	-0.03	-0.18	-0.27	0.03	-0.11	-0.04	-0.26	-0.16	-0.8	0.1	-0.29	-0.19	0.06	0.1	0.34	0.1	-0.06	0.04	-0.33	-0.12	0.03	0.3	-0.1	-0.17	-0.2	-0.32	-0.21	0.04	0.15	0.2	-0.06	-0.07	-0.07	0.03	0.1	-0.08	0.15	0.16	-1.01	0.04	0.23	NA	0.13
ATG7	1.73	-0.04	-0.62	0.02	-0.56	-0.72	0.12	-0.15	-0.93	0.2	0.04	-0.37	-0.37	-0.21	0.13	-0.79	-0.64	-0.06	0.21	-0.17	0.52	-0.43	-0.62	-0.07	0.24	0.04	0.23	0.8	0.18	0.16	-0.24	-0.59	0.1	0.32	-0.07	0.47	0.24	-0.08	-0.26	-0.2	0.36	0.22	-0.92	0	0.52	0.66	1.28	NA	NA
ATG9A	0.61	0.07	0.01	0.02	-0.26	0.14	-0.25	0.12	-0.35	0.29	0.16	0.11	NA	-0.09	-0.53	0.12	-0.04	-0.04	-0.33	0.19	-0.24	-0.48	NA	0.65	-0.55	-0.43	-0.02	0.33	0	0.37	0.23	0.17	0.35	0.19	0.06	0.15	0.28	0.25	-0.1	0.33	NA	0.13	0.26	0.13	NA	0.44	-0.08	NA	NA
ATG9B	NA	-0.07	-0.24	0.39	-0.35	-0.28	-0.27	0.3	0.04	-0.09	-0.49	-0.36	-0.22	0.24	0.08	-0.04	-0.09	-0.1	-0.52	-0.07	-0.63	-0.68	-0.59	0.35	-0.1	-0.18	-0.17	-0.17	-0.33	-0.33	0.11	-0.32	-0.29	0	-0.07	-0.1	0.11	0.41	0.08	0.4	-0.14	0.02	-0.62	-0.52	0.25	-0.92	0.41	NA	0.27
ATHL1	-0.45	0.05	1.3	-0.01	0.64	-0.98	0.14	-0.19	-0.07	0.21	0.25	-0.09	0.28	0.29	0.23	-0.45	0.35	0.02	-0.6	0.37	-0.19	-0.15	-0.2	-0.64	-0.35	-0.73	0.1	0.36	-0.1	0.13	0.38	-0.13	-0.14	0.2	0.22	-0.1	0.17	0.39	0.35	0.41	0.13	0.2	0.2	-0.19	-0.21	0.13	NA	NA	NA
ATIC	-0.18	0.18	0.14	0.2	0.1	-0.08	0.29	-0.24	-0.85	0.29	0.21	-0.33	-0.45	0.03	-0.31	-0.23	-0.77	-0.04	-0.08	0.35	0.29	-0.37	-0.35	-0.23	0.21	-0.11	0.42	0.48	0.03	-0.03	-0.14	0.09	-0.19	0.16	-0.45	0.35	-0.17	0.02	-0.02	0.05	0.2	0.1	0.38	0.21	0.29	-0.48	-0.45	-1.78	-0.5
ATM	-0.36	-0.045	-0.44	-0.06	-0.4	0.13	-0.005	0.4	-0.28	0.11	-0.085	-0.035	-0.345	0.005	-0.035	-0.21	0.12	0.045	-0.34	-0.29	0.095	-0.195	0.21	-0.54	0.03	0	0.035	0.31	-0.06	-0.175	-0.21	-0.14	-0.08	-0.06	0.065	0.045	0.125	0.07	0.16	0.225	0.37	-0.095	0.09	0.145	0.27	0.175	-0.7	NA	0.03
ATN1	NA	-0.06	0.6	-0.67	0.22	-0.13	0.32	0.31	-0.22	-0.43	0.68	0.24	-0.09	0.43	0.49	-1.06	0.36	0.03	-0.14	-0.56	0.24	0.53	0.25	NA	1.03	-0.07	0.02	-0.62	0.25	0.16	0.48	NA	-0.11	-0.09	-0.21	0.35	0.14	0.03	0.31	-0.4	0.25	0.42	0.09	NA	NA	0.64	-0.27	NA	0.55
ATOH8	0.52	0.06	-0.23	0.03	0.08	0.04	0.18	-0.04	0.06	0.03	-0.01	-0.13	0.13	0.22	-0.04	0.22	-0.04	-0.1	0.15	0.2	0.22	-0.24	0.18	-0.09	0.24	0.22	0.07	0.24	0.07	-0.27	-0.09	-0.08	-0.27	-0.23	NA	-0.13	-0.03	0.47	0.13	0.47	0.51	-0.16	0.18	-0.07	1.07	-0.39	0.24	NA	-0.27
ATOX1	1.16	0.2	-0.28	-0.23	-0.06	-0.26	0.03	0.26	-0.2	0.16	0.14	0.17	-0.19	0.02	0.07	0.2	-0.11	-0.06	0.05	0.21	0.08	-0.12	-0.12	0.37	0.24	-0.15	0.15	0.3	0.35	0.3	0.05	0.31	0.02	0.04	-0.25	0.06	0.03	0.12	-0.03	0.02	-0.2	-0.04	0.31	0.33	0.47	0.2	0.08	-0.55	0.03
ATP10A	0.36	0.09	0.1	0.05	0.41	-0.11	0.18	0.15	0.03	0.12	0.08	0	0.42	0.2	-0.17	-1.23	0.01	0.07	0.19	0.6	0.38	0.24	0.64	0.38	0.62	0.54	0.17	0.12	0.18	0.1	0.08	0.24	0.61	0.37	0.17	0.62	0.23	0.57	0.06	0	0.51	0.06	0.29	-0.06	0.09	0.22	0.04	0.29	0.21
ATP10B	0.315	-0.1075	-0.24	-0.1875	-0.265	0.2775	-0.3475	0.06	-0.0775	-0.265	-0.11	0.105	0.03	-0.0575	-0.05	0.3225	0.0125	-0.0525	-0.3075	0.1025	-0.703333	0.035	-0.0225	0.0325	-0.686667	-0.31	-0.1075	-0.5225	-0.095	-0.1975	0.145	0.1725	-0.1625	-0.1725	-0.335	-0.125	-0.1475	-0.2225	-0.255	-0.4125	0.0025	-0.1	0.0825	-0.04	0.045	-0.6025	-0.46	-0.205	-0.3175
ATP10D	NA	0.17	NA	NA	-0.24	0.29	0.46	0.3	0.92	NA	-0.41	-0.22	NA	-1.13	-0.06	NA	0.09	0.38	NA	1.25	NA	NA	NA	NA	NA	NA	NA	0.71	NA	0.13	0.07	NA	0.49	-0.19	-0.1	0.06	-0.15	0.26	-0.12	2.06	-0.22	NA	NA	NA	0.74	2.22	NA	NA	NA
ATP11A	0.71	-0.155	0.105	0.18	-0.0125	-0.21	-0.0725	0.2425	-0.24	-0.15	0.09	-0.0725	0.0533333	0.0225	0.0725	-0.1	-0.1675	-0.1225	-0.0425	-0.426667	-0.025	-0.21	-0.0133333	-0.22	0.075	0.0525	-0.1525	-0.135	-0.1325	-0.305	0.0766667	0.06	0.0075	-0.16	-0.1775	-0.146667	0.065	-0.39	-0.2025	-0.275	-0.406667	-0.1625	0.115	-0.0566667	-0.1225	-0.1525	-0.0775	0.173333	-0.045
ATP11B	-0.186667	-0.17	0.253333	0.00666667	0.27	-0.15	-0.04	0.00333333	-0.275	-0.186667	-0.205	-0.355	0.02	-0.0575	-0.26	-0.055	-0.2	-0.01	0.085	-0.0125	-0.02	-0.1025	-0.17	0.24	-0.0275	-0.0375	-0.0566667	-0.0875	-0.1025	-0.04	-0.203333	-0.2425	0.085	0.0125	0.02	-0.2	-0.2725	-0.193333	-0.01	0.035	-0.15	-0.155	0.0766667	-0.1175	-0.15	0.166667	0.16	-0.085	-0.0766667
ATP12A	0.5	0.24	-0.07	0.46	-0.39	0.57	-0.4	0.66	-0.14	-0.17	0.49	0.84	0.42	-0.05	0.45	-0.52	-0.03	0.19	0.01	0.57	-0.33	0.5	0.1	0.63	-0.67	-0.05	0.26	-0.17	0.56	0.41	0.38	0.6	0.54	0.04	-0.24	-0.35	0.82	0.47	-0.23	-0.31	0.33	0.15	0.69	0.75	0.17	0.12	0.35	-0.71	0.47
ATP13A1	-0.46	-0.6	0.4	-0.45	-0.38	-0.37	-0.35	-0.12	-0.28	-0.29	-0.36	-0.62	-0.65	-0.44	-0.5	-0.23	-0.28	-0.56	-0.49	0.32	-0.51	-0.34	-0.47	-0.14	-0.6	-0.66	-0.42	-0.02	-0.34	-0.17	-0.61	-0.36	-0.55	-0.29	-0.14	-0.57	-0.61	-0.49	-0.43	-0.41	-0.17	-0.51	-0.02	-0.26	-0.35	-0.66	-0.36	-0.05	-0.23
ATP13A2	-0.25	-0.226667	-0.136667	-0.206667	-0.153333	-0.00333333	-0.28	-0.0866667	-0.0333333	-0.37	-0.133333	-0.08	0.0633333	-0.17	0.0433333	0.0233333	-0.0533333	-0.05	-0.333333	-0.236667	-0.256667	0.103333	0	-0.113333	-0.276667	-0.24	-0.206667	-0.423333	-0.203333	-0.0666667	0.12	-0.00333333	0.0433333	-0.216667	-0.13	-0.35	-0.18	-0.116667	-0.216667	-0.54	-0.283333	-0.17	-0.116667	-0.346667	-0.103333	-0.246667	-0.146667	-0.00333333	-0.0233333
ATP13A3	NA	0.36	-0.2	-0.11	-0.02	-0.39	-0.11	0.15	-0.64	-0.04	0.01	-0.61	-0.65	0.03	-0.17	-0.45	-0.27	-0.29	-0.26	0.55	-0.12	-0.6	-0.43	-0.43	-0.29	-0.28	-0.29	0.31	0.04	0.13	1.52	-0.05	0.58	0.31	-0.31	0.18	-0.17	0.78	0.03	0.45	-0.18	-0.09	-0.04	-0.08	0.48	-0.16	0.09	NA	NA
ATP13A4	0.57	0.05	NA	0.1	0.81	-0.34	-0.16	0.02	0.22	-0.02	0.06	-0.26	0.34	-0.02	-0.22	-0.28	0.14	0.07	0.15	1.06	0	0.54	0.49	0.93	0	0.53	0.2	-0.24	0.1	0.1	NA	-0.1	0.6	0.32	-0.07	0.23	0.19	0.22	0.27	-0.05	0.37	0.3	NA	0.26	NA	-0.23	0.27	NA	NA
ATP13A5	-0.18	-0.24	0.23	0.64	-0.02	-0.27	-0.06	NA	-0.32	0.2	0.06	-0.33	-0.3	-0.15	-0.31	-0.88	-0.43	-0.27	-0.13	0.24	-0.11	-0.4	-0.04	-0.45	0.47	0.08	-0.09	0.07	-0.29	-0.28	-0.03	-0.1	0.49	-0.13	-0.31	-0.45	0.16	-0.13	-0.27	0.29	0.55	-0.08	-0.17	0.16	-0.17	0.43	0.84	NA	0.43
ATP1A1	0.41	-0.15	-0.15	-0.15	0.17	0.22	-0.17	0.01	-0.25	-0.08	-0.13	-0.06	-0.27	-0.25	0.02	0.02	-0.06	0	-0.13	0	-0.2	-0.31	-0.17	-0.19	-0.11	-0.07	-0.04	-0.18	-0.15	-0.03	-0.35	-0.51	-0.24	-0.16	-0.08	0.03	-0.25	-0.19	-0.03	-0.38	-0.17	0.04	-0.09	-0.18	-0.52	-0.3	-0.26	0.02	-0.29
ATP1A2	2.58	-0.23	-0.44	-0.07	-0.25	-0.2	0.09	0.65	0.17	0.06	0.41	0	-0.3	0.23	-0.25	-0.14	0.18	0.13	-0.21	0.45	-0.43	0.49	NA	1.15	0.05	-0.12	0.13	0.22	0.01	-0.01	-0.42	NA	-0.06	-0.08	0.13	0.15	-0.04	0.27	0	0.33	NA	0.09	NA	0.15	0.71	-0.91	1.13	NA	NA
ATP1A3	-1.09	-0.13	-0.85	0.73	0.2	0.28	-0.25	-0.01	0.21	-0.16	-0.17	-0.21	-0.2	1.37	-0.18	0.21	0.14	-0.16	-0.77	0.49	-0.12	0.12	-1.21	-0.35	-0.63	-0.58	-0.4	0.12	-0.29	-0.31	0.64	0.35	0.29	-0.22	-0.09	-0.12	-0.19	0.69	0.41	0.69	0.3	-0.13	0.17	-0.12	0.36	-0.34	NA	NA	-0.13
ATP1A4	0.15	-0.045	-0.06	0	0.515	0.08	-0.09	0.155	0.14	-0.27	-0.285	0.005	0.27	0.055	-0.05	-0.35	-0.11	0.035	0.115	0.085	0.63	-0.15	-0.035	-0.075	0.47	0.48	-0.145	-0.19	0.015	-0.025	-0.095	0.24	0.375	0.285	0.34	-0.155	0.035	0.15	-0.36	0.19	-0.12	-0.07	-0.125	0.27	-0.405	0.195	0.105	0.39	0.05
ATP1B1	NA	0.14	NA	0.1	-0.54	0.16	0.55	0.44	-0.08	-0.13	0.34	0.17	-0.15	0.08	0.87	-0.39	0.13	0.14	-0.01	0.81	-0.35	0.03	0.55	1.49	0.58	0.44	0.14	-0.07	-0.04	0.12	-0.14	NA	NA	-0.02	-0.15	-0.06	-0.07	0.48	0.06	-0.11	NA	0.09	NA	-0.03	1.01	NA	NA	NA	0.32
ATP1B2	-0.81	0.29	-0.39	-0.26	-0.22	0.7	-0.08	0.3	0.24	-0.08	0.05	-0.07	0.19	0.14	0.25	-0.01	0.14	-0.14	0.05	0.03	0.09	-0.19	0.44	-0.05	0.13	0.07	0	0.45	-0.03	0.68	0.16	-0.11	0.09	0.2	0.25	-0.18	0.26	0.53	0.12	-0.11	0.28	0.13	0.6	0.23	0.49	-0.08	0.55	0.19	-1.02
ATP1B3	0.25	0.32	0.4	0.33	-0.04	-0.01	0.43	0.3	-0.69	0.46	0.25	0.18	-0.41	-0.09	-0.12	-0.57	-0.34	0.25	-0.02	0.08	0.67	0.39	-0.26	-0.31	0.34	0.33	0.45	0.74	0.12	0.33	0.2	0.51	-0.12	0.26	-0.25	0.29	-0.19	-0.04	0.4	0.33	0.52	0.33	0.09	0.6	0.65	-0.71	-0.04	-0.26	NA
ATP1B4	-0.2	0.02	-0.09	0.5	0.21	0.16	-0.02	-0.1	0.07	0.04	0.02	0.01	-0.89	0.21	0.01	-0.85	0.12	-0.09	-0.44	0.2	-0.04	0.12	-0.61	0.36	-0.08	-0.48	0.24	0.42	0.05	0.07	-0.36	0.13	0.41	-0.03	0.01	0.3	-0.03	0.38	0.19	0.61	0.05	0.04	-0.09	-0.12	0.34	0.08	0.03	NA	-0.47
ATP2A1	NA	-0.46	NA	0.71	NA	NA	NA	NA	NA	NA	0.05	NA	NA	-0.29	0.83	-0.93	-0.66	-0.11	-0.45	NA	-1.22	NA	NA	0.72	NA	-0.14	-0.08	-0.34	NA	-0.03	0.73	-0.22	NA	-0.48	-0.12	NA	1.04	-0.19	-0.63	-0.7	NA	NA	NA	0.39	NA	0.31	NA	NA	NA
ATP2A2	-0.57	-0.28	-0.25	0.02	-0.36	0.1	-0.43	-0.33	0.62	-0.34	-0.67	-0.6	-0.57	-0.25	-0.08	0.53	0.25	-0.05	-1.05	-0.06	-1.34	-0.32	-0.48	0.29	-1.25	-0.65	-0.3	-0.88	-0.34	-0.19	-0.37	-0.5	-0.6	-0.33	0.46	-0.39	-0.19	-0.71	0.1	-0.4	-0.63	-0.88	-0.21	-0.36	-0.95	-1.16	-0.7	0.2	-0.29
ATP2A3	-0.25	-0.2	-0.14	0.23	-0.36	0.09	-0.24	0.12	0.37	-0.18	-0.14	-0.37	-0.71	0.09	0.35	0.49	0.02	-0.2	-0.46	-0.22	-0.46	-0.24	-0.64	0.08	-0.72	-0.55	-0.25	-0.22	-0.37	-0.37	-0.66	-0.52	-0.09	-0.5	0.09	-0.29	-0.28	-0.15	0.08	0.2	-0.24	-0.32	-0.61	-0.29	-0.42	0.27	-1.42	NA	-0.75
ATP2B1	0.245	-0.585	-0.055	-0.44	-0.685	-0.375	-0.74	-0.365	-0.175	-0.46	-0.365	-0.3	-0.27	-0.195	-0.195	0.33	-0.165	-0.58	-0.575	-0.285	-0.455	-0.205	-0.525	-0.24	-0.36	-0.51	-0.565	-0.52	-0.34	-0.48	-0.03	-0.03	-0.3	-0.52	-0.34	-0.435	-0.21	-0.085	-0.215	-0.015	-0.045	-0.325	0.125	-0.41	-0.06	-0.77	-0.56	-1.14	-0.385
ATP2B2	0.6	-0.295	-0.035	-0.565	-0.01	-0.375	-0.08	-0.26	-0.425	-0.33	-0.275	-0.4	-0.09	-0.39	-0.27	0.67	-0.105	-0.285	-0.2	-0.225	-0.46	-0.325	-0.095	0.02	-0.46	-0.315	-0.395	-0.435	-0.295	-0.17	-0.335	-0.135	-0.385	-0.365	-0.335	-0.22	-0.265	-0.655	-0.36	-0.34	-0.035	-0.245	0.105	-0.33	-0.3	-0.87	-0.765	-0.25	-0.535
ATP2B3	-0.0766667	-0.103333	-0.113333	-0.206667	-0.326667	-0.103333	0.00666667	-0.203333	0.04	0.0533333	0.0333333	0.0566667	-0.12	-0.16	-0.16	0.503333	-0.2	0.0466667	-0.0766667	-0.353333	-0.18	-0.0133333	-0.17	-0.183333	-0.05	-0.1	-0.06	-0.0666667	0.07	-0.04	-0.123333	-0.406667	-0.33	0.02	-0.00666667	0.0433333	-0.11	-0.306667	-0.296667	-0.313333	-0.293333	0.05	-0.12	0.0433333	-0.246667	-0.143333	0.0466667	-0.433333	-0.143333
ATP2B4	-0.363333	-0.22	-0.07	-0.0266667	-0.00666667	-0.0933333	-0.15	0.0833333	0.213333	-0.12	-0.183333	-0.246667	-0.266667	0.106667	0.11	0.386667	0.136667	-0.00333333	-0.266667	-0.533333	-0.376667	-0.136667	-0.27	-0.276667	-0.343333	-0.383333	-0.2	-0.403333	-0.3	-0.22	-0.37	-0.133333	-0.283333	-0.27	0.153333	-0.296667	-0.226667	-0.14	0.1	0.103333	-0.38	-0.213333	-0.176667	-0.33	-0.33	-0.31	-0.48	0.22	-0.055
ATP2C1	0.98	-0.04	0.12	0.13	0.41	0.06	-0.23	0.36	-0.43	-0.24	0.19	0.51	0.25	-0.26	0.27	-0.34	-0.38	0.08	0.14	0.58	0.16	0.28	0.24	0.32	0	0.22	0.08	-0.27	0.16	0.15	0.38	1.02	0.38	-0.07	-0.67	-0.26	0.09	0.44	-0.52	-0.48	0.55	0.05	0.37	0.32	0.41	0.31	0.33	0.6	0.5
ATP2C2	-0.56	-0.21	0.34	0.32	-0.15	-0.6	0.13	0.2	-0.54	0.02	-0.09	-0.3	-0.06	-0.04	0.12	0.51	-0.37	-0.16	-0.29	-0.82	-0.02	-0.77	-0.7	-0.55	-0.1	0.17	-0.05	0.13	0.14	0.01	-0.51	-0.51	-0.55	-0.08	-0.04	-0.02	0.24	-0.33	-0.14	0.12	-0.92	-0.05	0.31	-0.38	0.4	-0.34	-0.46	NA	0.06
ATP4A	-0.36	-0.09	-0.16	-0.42	-0.12	0.04	0.07	-0.08	-0.02	0.01	0.09	-0.43	-0.98	-0.1	-0.14	0.35	-0.09	-0.05	-0.31	-0.01	-0.29	-0.5	-0.43	-0.36	-0.26	-0.57	-0.26	-0.17	-0.41	-0.26	-0.43	-0.38	-0.26	-0.15	-0.09	0.09	-0.13	-0.22	0.01	0.29	-0.57	-0.16	-0.32	-0.23	-0.47	-0.17	-0.02	NA	-0.47
ATP4B	-0.09	0.04	0.33	-0.07	0.25	0.1	-0.11	-0.19	-0.2	-0.1	0.04	-0.07	0.15	-0.06	0.05	-0.45	-0.03	0.04	0.18	-0.51	0.3	-0.07	-0.06	-0.32	0.32	0.01	0.05	0.2	-0.07	0.06	0.12	-0.81	-0.02	-0.06	-0.05	-0.12	-0.18	0.36	0.08	0.19	-0.33	-0.06	-0.06	0.08	0.19	0.31	0.23	0.59	0.25
ATP5A1	-0.24	0.06	0.4	0.01	-0.28	-0.54	0.29	-0.22	-1.07	0.35	0.06	-0.42	-0.7	-0.52	-0.23	-0.45	-1.38	-0.1	0.06	0.3	0.52	-0.69	-0.23	0.14	0.09	-0.09	0.47	0.81	0.08	0.08	-0.31	-0.15	-0.52	0.18	-0.94	0.03	-0.1	0.08	-0.33	-0.31	0.22	0.28	-0.37	0.48	0.02	-0.39	-0.28	-1.41	-0.69
ATP5B	-0.14	-0.1	-0.12	0.1	-0.02	-0.45	0.01	-0.26	-0.76	0.24	-0.29	-0.46	-0.17	-0.25	0.07	-0.12	-1.17	-0.21	0.08	-0.28	0.27	-0.25	-0.35	-0.27	0.08	-0.07	0.19	0.47	0.08	0.24	-0.03	-0.1	-0.1	0.09	-0.3	0.09	0.04	0.05	0	0.14	-0.14	0.09	-0.37	0.14	0.51	-0.76	0.11	-0.36	-0.12
ATP5C1	0.2	0.13	0.76	0.25	-0.83	-0.28	-0.07	0.57	-0.97	-0.2	-0.04	-0.22	-0.79	-0.9	-0.56	-0.32	-0.58	-0.33	-0.26	-0.25	0.85	-0.29	NA	0.03	-0.1	-0.3	0.19	0.66	-0.14	0.18	0.47	1.08	-0.21	0.34	-0.51	-0.18	0.14	0.08	-0.22	0.15	0.07	0.29	-1.07	0.44	1.08	-0.16	0.67	NA	-0.4
ATP5D	0.54	0.4	0.28	-0.25	0.61	-0.78	0.67	-0.24	0.09	0.67	0.02	-0.47	-0.18	0.44	-0.35	-0.38	0.07	-0.12	-0.2	0.53	0.16	0.06	0.16	-0.09	0.41	0.38	0.17	0.77	0.21	0.07	-0.16	-0.48	-0.05	0.11	0.46	0.5	0.02	0.35	0.51	0.49	0.22	-0.1	0.2	-0.19	0.47	-0.53	0.5	-0.79	0.12
ATP5E	0.28	0.11	1.17	0.43	-0.4	0.37	0.22	0.3	-0.9	0.19	0.26	0.2	0.12	-0.6	-0.17	-0.64	-0.58	-0.16	-0.1	0.32	1.47	0.11	-0.28	-0.53	0.35	-0.08	0.52	1.03	0.37	0.82	0.25	0.82	0.4	0.38	-0.71	0.39	0.61	0.52	-0.41	-0.22	0.12	0.54	-0.53	0.93	0.88	0.92	1.17	0.24	0.54
ATP5F1	0.32	0.24	0.63	0.16	-0.24	0.13	0.1	0.26	-1.2	0.4	-0.03	-0.46	-0.42	-1.1	-0.33	-0.52	-1.43	-0.42	-0.11	0.27	0.38	-0.51	-1.09	-0.98	-0.57	-0.93	0.27	0.83	0.04	0.31	-0.01	0.21	0.14	0.2	-0.63	0	0.09	0.51	-0.42	0.01	0.15	0.02	-0.1	0.37	0.53	-0.87	0.13	-1.15	-0.25
ATP5G1	0.15	0.12	0.14	0.165	0.3	0.26	-0.055	-0.15	-0.22	0.215	-0.165	-0.055	0.02	-0.15	-0.255	-0.95	-0.365	-0.035	0.2	0.47	0.38	-0.225	-0.16	0.31	0.34	0.155	0.175	0.53	0.05	0.135	0.085	0.585	0.56	0.055	-0.11	0.07	0.155	0.55	-0.11	0.185	0.405	-0.045	-0.205	0.13	0.655	0.32	0.365	0.54	0.31
ATP5G2	0.15	0.4	0.32	0.12	0.71	0.2	0.32	-0.03	-0.44	0.32	-0.2	-0.45	-0.22	-0.06	0.06	-0.46	-0.55	-0.04	-0.13	0.01	0.33	0.09	0.03	-0.41	0.21	0.07	-0.01	0.66	0.35	-0.11	0.61	0.5	0.26	0.01	-0.16	0.29	-0.21	0.54	-0.02	0.06	-0.05	0.01	0.18	0.05	0.98	-0.13	0.23	-0.05	-0.11
ATP5G3	0.15	0.18	0.08	-0.03	-0.11	-0.16	0.16	-0.12	-0.95	0.42	0.15	-0.27	-0.46	-0.56	-0.13	-0.18	-1.11	-0.17	0.11	-0.13	0.39	0.26	-0.43	-0.37	0.04	-0.05	0.24	0.22	0.02	0.33	-0.09	-0.58	-0.35	0.08	-0.39	-0.05	-0.08	0.16	-0.27	-0.26	-0.01	0.13	-0.33	0.27	0.39	0.1	0.72	-0.09	0.15
ATP5H	-0.02	0.17	0.81	0.06	-0.18	0.29	0.29	0.5	-1.03	0.29	0.15	-0.24	-0.42	-0.23	0.2	-0.82	-1.23	-0.24	-0.04	0.02	0.65	0.24	-0.14	0.25	0.35	-0.08	0.05	0.63	0.1	-0.03	0.59	0.45	0.46	0.05	-1	0.28	0.05	0.86	-0.73	-0.43	0.18	0.31	0.53	0.56	1.45	0.87	0.6	-0.32	0.55
ATP5I	0.22	0	0.36	0.08	0.35	-0.01	0.04	-0.1	-0.21	-0.1	-0.02	-0.13	-0.13	-0.23	-0.17	-0.34	-0.03	-0.1	-0.39	0.19	0.11	0.41	-0.24	-0.07	-0.51	-0.43	-0.12	-0.05	-0.22	-0.04	0.29	0.51	0.02	-0.07	-0.32	-0.07	0.08	0.01	0.12	-0.11	0.1	0.11	-0.03	0.09	0.39	-0.26	0.46	-0.33	-0.05
ATP5J	0.2	-0.04	1.14	0.11	0.11	-0.18	0.2	0.13	-0.73	NA	0.1	-0.1	-0.56	-0.31	-0.65	-0.18	-0.31	-0.13	-0.09	0.21	0.92	0.23	-0.75	-0.19	-0.43	-0.41	0.42	0.76	-0.01	0.37	0.37	0.32	0	0.1	-0.31	0.13	-0.02	0.19	-0.18	0.01	0.53	0.41	-0.36	0.38	1.03	0.02	0.63	-1.11	-0.16
ATP5J2	-0.2	0.3	0.44	-0.18	-0.09	0.11	0.33	0.14	-0.34	0.49	0.13	-0.35	-0.54	-0.07	-0.1	-0.82	-0.51	-0.33	-0.3	0.2	0.28	0.02	-0.55	-0.02	-0.24	-0.33	0.04	0.79	0.14	0.19	0.26	0.44	0.1	0.34	-0.27	0.52	0	0.98	0.05	0.41	-0.04	0.36	-0.16	-0.03	0.56	0.24	0.73	-0.93	0.18
ATP5L	0.39	-0.16	0.58	-0.19	-0.09	-0.24	0.1	0.1	-1.14	0.2	-0.05	-0.45	-0.36	-0.56	-0.37	-0.45	-0.94	-0.55	-0.05	0.62	0.88	-0.35	-0.4	-0.42	0	-0.26	-0.18	0.4	0.14	0.03	-0.15	0.34	0.06	-0.08	-0.84	-0.18	-0.07	0.52	-0.47	-0.19	-0.07	0.07	-0.23	0.51	0.24	0.7	0.89	0.14	0.36
ATP5O	0.48	0.31	0.535	0.19	0.06	0.165	0.19	0	-0.565	0.335	0.255	-0.105	0.13	-0.505	-0.08	-0.73	-0.62	-0.135	0.21	0.525	1.185	0.13	-0.77	-0.32	-0.3	-0.68	0.21	0.72	0.21	0.39	0.49	0.54	0.275	0.18	-0.135	0.165	0.3	0.64	0.015	0.02	0.375	0.325	-0.315	0.745	1.11	0.345	0.555	-0.81	0.39
ATP5S	0.39	-0.19	0.36	-0.19	0.07	-0.21	0.01	-0.08	0.06	0.14	0.06	-0.25	-0.11	-0.03	-0.09	-0.17	-0.01	-0.23	-0.48	0.83	-0.31	0.23	-0.2	0.58	-0.55	-0.35	-0.06	0.02	-0.26	-0.25	-0.29	0.07	-0.15	-0.22	-0.27	0	-0.08	-0.11	-0.02	0.08	-0.22	-0.16	0.14	0.04	-0.31	-0.77	-0.18	-0.74	-0.3
ATP6	0.52	0.2	-0.09	-0.61	0.16	-0.54	-0.36	-0.54	-0.73	-0.37	-0.41	-0.48	0.53	-0.44	-0.44	-0.45	-0.81	-0.15	0.06	0.02	0.57	-0.33	0.09	-0.05	0.44	0.19	-0.07	-0.2	-0.14	-0.53	0.13	0.05	0.29	0.21	-0.74	0.36	-0.17	0.73	-0.39	-0.05	0.33	-0.1	-0.14	-0.73	0.51	-0.65	-0.77	-0.93	-0.34
ATP6AP1	NA	0.5	-0.02	0.14	0.22	0	0.46	0.4	0.04	0.35	0.25	-0.42	-0.34	0.25	0.39	-0.07	-0.19	-0.09	-0.07	0.06	-0.29	-0.38	-0.47	-0.24	-0.14	-0.12	0.23	0.66	0.23	-0.01	1.41	-0.01	0.44	0.43	-0.05	0.6	-0.01	0.4	0.13	0.15	0.09	-0.23	0.03	0.01	-0.35	0.02	-0.09	-0.26	NA
ATP6AP2	-0.075	0.19	-0.02	0.22	-0.335	-0.23	-0.01	0.675	-1.335	-0.1	-0.615	-0.595	-0.765	-0.64	-0.07	-0.705	-1.14	-0.405	0.605	-0.205	0.445	-0.82	-0.33	-0.66	0.165	0.175	0.21	0.57	-0.15	-0.03	-0.1	0.425	0.4	0.27	-0.245	0.14	0.145	0.395	-0.235	0.09	0.26	-0.32	-0.775	0.12	0.675	-0.9	-0.085	0.81	0.1
ATP6V0A1	0.05	-0.135	0.115	0.195	-0.21	0	-0.145	-0.15	0.175	-0.045	0.055	-0.015	-0.22	-0.035	-0.05	0.74	0.085	0.005	-0.305	-0.125	-0.18	0.04	-0.47	-0.33	-0.13	-0.11	-0.11	-0.065	-0.17	-0.07	-0.01	-0.355	-0.265	0.025	-0.045	0.115	-0.11	-0.105	0.04	-0.01	-0.205	-0.09	-0.07	-0.135	-0.16	-0.025	0.16	-0.17	-0.62
ATP6V0A2	-0.67	-0.03	0.53	0.42	-0.76	-0.1	0.26	0.2	-0.53	0.29	-0.05	-0.15	-0.52	-0.3	0.19	-0.05	-0.64	-0.01	0.18	0.34	0.4	-0.81	NA	-0.42	0.12	-0.19	0.3	0.75	0.36	0.24	-0.83	-0.44	-0.3	0.2	-0.16	0.05	0.16	0	-0.07	0.26	NA	0.51	0.23	0.49	0.75	0.49	1.05	NA	NA
ATP6V0A4	NA	0.02	NA	0.52	0.27	NA	-0.18	-0.1	0.35	0.06	0.33	0.16	NA	-0.08	NA	-1.57	0.18	0.06	-0.39	NA	0.01	-0.13	NA	2.08	0.61	-0.17	-0.16	0.18	0.25	0.09	-0.26	0.72	0.39	0.31	0.06	0.4	-0.09	0.08	-0.07	0.36	-0.43	0.17	NA	0.57	-0.1	1.1	NA	NA	0.72
ATP6V0B	-0.06	-0.18	0.56	-0.13	-0.06	-0.2	0.15	0.03	-0.19	-0.18	-0.02	-0.43	0.27	-0.25	-0.29	-0.24	-0.03	-0.21	0.32	-0.27	0.39	-0.56	-0.38	-0.07	0.5	-0.08	0.23	1.06	0.22	0.23	0.11	-0.65	-0.11	0.24	0.16	0.22	0.11	-0.03	-0.29	0.04	-0.14	-0.43	-0.23	-0.18	0.47	0.25	0.01	0.74	0.07
ATP6V0C	-0.4	-0.07	0.05	-0.15	-0.45	-0.06	-0.35	-0.13	0.41	-0.18	-0.05	0	0.53	0.01	0.08	0.65	0.14	0.06	-0.03	0.21	-0.14	0.93	0.15	0.19	-0.01	0.18	-0.33	-0.41	-0.3	-0.14	0.02	0	-0.11	-0.11	0.13	-0.22	0.03	-0.03	-0.27	-0.21	-0.08	-0.1	0.09	-0.06	-0.31	-0.49	-0.4	-0.06	0.09
ATP6V0D1	0.19	0.01	-0.33	-0.17	0.32	-0.75	0.19	-0.22	-0.83	-0.13	-0.12	-0.48	-0.2	-0.57	-0.26	-0.11	-0.61	-0.21	0.34	-0.37	0.14	-0.88	-0.02	-0.56	0.17	-0.1	0.1	0.55	0.03	0.03	-0.05	-0.32	-0.11	0.12	-0.46	0.08	0.2	-0.23	-0.63	-0.34	0	-0.09	-0.14	-0.56	0	-1.87	-0.28	-0.14	-0.25
ATP6V0E1	0.17	0.07	0.5	0.02	-0.65	-0.25	0.42	0.34	-0.89	0.02	-0.24	-0.48	-0.21	-0.6	0.01	-0.91	-0.81	-0.36	0.47	0.94	0.57	-0.3	-0.42	-0.73	0.33	-0.21	0.33	0.94	0.3	0.24	-0.39	0.08	-0.2	0.25	-0.59	0.04	0.15	0.01	-0.6	-0.45	-0.14	-0.01	-0.1	0.44	0.29	0.72	0.69	0.8	0.23
ATP6V1A	-0.15	0.05	NA	0.43	0.31	-0.26	0.63	0.67	0.15	0.52	0.06	0.2	-0.31	0.27	0.51	-0.46	0.13	0.65	-0.03	-0.09	-0.32	-0.21	-0.31	-0.12	0.28	-0.26	0.33	0.57	0.06	0.05	-0.45	-0.67	0.4	0.13	0.43	-0.06	-0.13	0.05	0.31	0.59	0.74	0.17	0.41	NA	0.35	0.32	-0.21	NA	-1.55
ATP6V1B1	-0.48	-0.43	-0.11	0.54	-0.18	0.34	-0.28	0.22	0.38	-0.18	-0.42	0.03	-0.07	0.17	-0.45	1.27	0.12	-0.64	-0.18	0.24	-0.48	0.69	-0.17	-0.08	0.06	0.24	-0.21	-0.29	-0.26	0.24	-0.01	0.47	0.05	0.08	-0.07	-0.19	0.18	0.1	0.17	-0.26	-0.52	0.26	-0.61	0.17	NA	-0.19	0.05	NA	0.87
ATP6V1B2	0.23	-0.15	-0.4	0.37	-0.32	-0.44	0.04	0.78	-0.93	-0.13	-1.02	-1.09	-0.61	-0.41	0.45	-1.44	-0.62	-0.84	0.51	0.21	-0.22	-0.61	-0.67	-0.1	0.2	-0.32	0.28	0.92	-0.22	0.07	0.27	0.41	0.66	0.32	-0.31	0.11	-0.05	0.7	-0.7	0.1	0.05	-1.28	-0.57	-0.34	0.52	0.11	-0.53	0.58	0.05
ATP6V1C1	0.11	0.15	0.14	0.09	0.55	-0.47	0.02	0.96	-0.93	-0.3	-0.22	-0.2	-0.53	-0.63	-0.21	-1.71	-1.14	-0.51	0.22	0.02	0.19	-0.41	-0.49	0.13	-0.43	-0.27	0.14	0.95	0.13	0.11	-0.12	0.05	-0.29	0.48	-0.29	0.2	0.24	0.53	-0.39	0.21	0.55	0.04	-0.14	0.4	1.05	NA	0.68	0.01	0.56
ATP6V1C2	-0.7	-0.02	0.08	0.16	0.24	0.18	-0.18	0.16	0.35	-0.14	0.03	-0.12	0.35	0.07	0.48	-0.41	-0.02	-0.03	0.34	0.71	0.58	-0.46	0.2	0.46	0.27	0.47	-0.02	0.03	-0.05	0.21	0.16	-0.2	0.71	-0.1	0.54	0.07	0.06	-0.15	0.11	-0.36	-0.09	-0.11	0.77	NA	-0.05	0.32	0.26	1.63	-0.55
ATP6V1D	0.15	0.12	0.055	0.34	-0.045	0.18	0.25	0.33	-0.195	0.025	-0.11	-0.05	0.2	-0.215	0.02	-0.3	-0.17	0.155	0.13	0.4	0.1	0.065	0.095	-0.14	-0.68	-0.03	0.31	0.55	0.17	0.305	0.515	0.175	0.305	0.49	0.05	0.445	0.325	0.53	-0.195	-0.17	0.26	0.135	-0.1	0.26	0.37	-0.535	0.375	0.085	-0.07
ATP6V1E1	0.24	0.03	0.43	0.47	1.09	0.27	0.26	0.33	-0.34	-0.08	0.07	-0.37	-0.45	-0.15	0.29	-0.87	-0.2	-0.2	-0.03	0.13	0.1	0.02	-0.44	-0.32	-0.16	-0.16	0.27	0.54	-0.1	-0.06	0.33	0.41	0.05	0.14	-0.29	0.07	0.03	0.49	0.06	0.2	0.07	0	-0.03	-0.09	0.6	-0.03	0.12	0.42	-0.08
ATP6V1F	-0.24	0.37	0.33	-0.02	0.24	0.18	0.82	0.27	-0.91	0.57	-0.07	-0.38	-0.05	-0.28	-0.18	-0.79	-0.99	-0.01	-0.06	0.67	0.41	-0.24	0.06	0.04	0.31	0.07	0.41	1.19	0.29	0.04	0.34	0.6	0.25	0.45	-0.66	0.28	-0.2	0.46	-0.24	-0.31	-0.2	0.14	-0.38	0.31	0.63	0.37	1.33	0.9	0.91
ATP6V1G1	-0.12	0.29	0.44	0.19	-0.36	-0.41	-0.04	0.36	-1.27	0.1	-0.29	-0.52	-0.13	-0.92	-0.38	-0.23	-1.45	-0.36	0.53	0.11	1.19	-0.62	-0.43	-0.48	0.32	-0.38	0.11	0.91	NA	0.62	-0.15	0.35	-0.17	0.54	-0.23	0.39	0.65	0.1	-0.62	-0.04	0.15	-0.08	-0.65	0.56	0.31	-0.85	1.46	NA	0.44
ATP6V1G2	0.08	0.15	-0.63	-0.18	0.35	0.11	0.13	0.16	-0.2	0.08	0.21	0.02	0.04	-0.12	0.03	0.36	-0.02	0	0.2	0.11	0	0.37	0.07	0.04	-0.05	-0.05	0.08	0.2	-0.1	-0.03	0.17	-0.07	0.36	0.15	-0.27	-0.12	-0.04	0.55	-0.16	-0.41	0.28	-0.01	-0.01	0.07	-0.14	0.28	0.47	-0.34	-0.11
ATP6V1H	-0.12	0.065	0.28	-0.02	-0.125	0.31	0.04	-0.03	-0.055	0.2	0.335	-0.1	-0.425	-0.175	0.105	0.39	-0.14	-0.025	-0.17	-0.08	-0.195	0.075	-0.68	-0.615	-0.225	-0.07	0.21	0.04	-0.165	-0.19	0.23	0.035	0.225	-0.025	-0.025	-0.33	-0.13	-0.32	0.13	0.13	0.135	0.11	0.72	-0.19	-0.18	-0.62	-0.33	0.01	-0.15
ATP7A	-0.38	-0.07	0	0.16	-0.29	0.04	0.14	0.03	0.07	0.12	0.28	0.07	-0.25	0.23	0.11	0.4	0.1	0.14	-0.11	0.18	-0.36	0.14	-0.01	-0.59	-0.04	-0.03	0.05	0.1	0.07	0.06	0.31	-0.82	-0.96	0.15	-0.01	0.06	-0.04	-0.2	0.2	0.12	0	0.03	0.27	0.05	-0.2	-0.93	0.27	0.25	0.4
ATP7B	NA	0.43	0.17	0.49	-0.74	0.09	-0.22	-0.15	0	0.15	0.29	0.13	0.28	0.1	0.41	-0.15	0.06	0.42	0.28	0.8	0.39	0.07	-0.03	0.81	0.41	0.19	0.07	0.25	0.13	-0.04	0.19	0.55	0.56	0.39	0.14	-0.15	0.25	0.82	0.11	0.66	1	0.28	0.63	-0.04	NA	0.49	0.69	0.46	NA
ATP8	-0.3	0.175	-0.58	-0.475	-0.34	-0.085	0.365	-0.05	-0.455	0.225	-0.325	-0.435	0.14	-0.405	-0.165	0.11	-0.635	-0.02	0.45	-0.465	0.21	-0.54	-0.02	-0.275	0.1	0.225	0.25	0.315	0.04	-0.31	-0.235	0.205	0.1	0.205	-0.405	0.395	-0.325	0.475	-0.3	-0.34	-0.085	-0.125	-0.375	-0.195	-0.215	-0.505	0.345	0.165	0.37
ATP8A1	-0.45	0	-0.34	0.5	-0.55	0.21	0.27	0.28	0.01	-0.15	0.55	-0.09	NA	-0.05	-0.1	-0.04	-0.04	0.3	-0.07	-0.1	0.04	0.03	NA	-0.16	0.13	-0.11	-0.22	-0.01	-0.15	NA	0.03	-0.17	-0.15	0.19	-0.03	0.48	0.51	-0.15	-0.13	-0.21	-1.43	0.27	1.08	0.21	-0.43	-0.66	-0.45	NA	0.55
ATP8A2	0.44	-0.46	-0.01	-0.22	0.34	0.27	-0.27	-0.69	-0.5	-0.31	-0.1	-0.38	-0.31	-0.29	-0.58	0.55	-0.58	-0.53	-0.32	-0.1	-0.27	0.19	-0.22	-0.13	-0.3	-0.38	-0.28	-0.09	-0.25	-0.44	0.23	0.2	-0.57	-0.42	-0.58	-0.58	-0.27	-0.23	-0.53	-0.41	-0.02	-0.49	0.16	-0.3	0.61	-1.93	-1.56	-1.05	-1.21
ATP8B1	0.26	0.12	-0.48	0.305	0.225	0.32	0.11	0.35	0.46	0.135	0.24	0.045	0.075	-0.025	0.17	0.32	0.24	0.23	-0.525	0.595	-0.4	0.2	-0.11	0.55	-0.28	NA	0.165	0.13	-0.03	0.185	0.37	0.61	0.335	0.475	0.185	0.1	-0.005	0.2	0.215	0.155	0.045	0.11	1.1	-0.1	0.02	-0.1	0.02	NA	1.21
ATP8B2	0.12	-0.11	0.15	0.01	0.1	0.11	-0.06	-0.18	-0.28	-0.15	-0.04	-0.29	0.26	-0.25	0.03	-0.57	-0.48	-0.16	0	0.31	0.84	0.09	0.12	0.26	0.6	0.28	-0.26	0.26	0.05	-0.16	0.45	0.71	0.2	0.45	-0.19	0.08	-0.05	0.33	-0.24	-0.18	0.14	-0.15	-0.15	0.07	0.73	-0.19	-0.08	0.17	-0.07
ATP8B4	-0.41	-0.21	0.04	-0.09	-0.41	-0.1	-0.32	0	0.14	0.14	0.08	-0.04	-0.035	-0.11	0.085	0	0.08	0.04	-0.005	0.045	0.08	-0.325	0.33	-0.395	0.09	-0.05	0.13	0.05	0.12	-0.11	0.11	-0.085	0.7	0.04	-0.135	0.3	-0.01	0.285	0.02	0.43	0.18	-0.02	-0.45	0.23	0.3	-0.095	-0.085	-0.2	0.05
ATP9A	0.3	-0.075	-0.145	-0.08	0.27	-0.155	-0.03	-0.195	0.05	-0.065	-0.03	-0.115	-0.175	-0.075	-0.225	0.485	0.04	-0.065	-0.175	-0.365	-0.32	-0.04	-0.19	-0.07	-0.29	-0.28	-0.18	-0.315	-0.05	-0.145	-0.04	-0.475	-0.375	-0.26	-0.125	-0.065	-0.175	-0.18	0.005	-0.14	-0.315	-0.125	0.01	-0.215	-0.33	-0.055	0.125	-0.49	-0.295
ATP9B	0.2	0.26	0.3	-0.88	-0.34	-0.27	0.05	-0.04	-0.67	0.15	-0.24	0.27	0.46	-0.21	-0.15	-0.21	-0.12	-0.52	0.46	-0.09	-0.1	0.28	0.3	-0.75	0.29	-0.22	-0.22	0.61	0.33	0.42	-0.53	-0.53	-0.46	0.25	-0.7	0.03	-0.14	0.11	-0.88	-0.51	-0.67	-0.35	-0.53	-0.47	-0.11	1.47	0.89	0.37	1.08
ATPAF1	-0.195	0.12	0.17	0.34	0.305	0.24	0.015	0.04	0.27	-0.08	0.145	0.175	0.235	0.06	0.155	-0.03	0.19	0.22	0.13	0.155	0.26	-0.05	0.325	0.42	0.05	0.425	-0.055	-0.09	0.075	0.12	0.43	0.62	0.19	0.03	0.235	0.035	0.055	0.115	0.095	-0.035	0.155	0.025	-0.145	0.195	0.005	-0.065	0.125	-0.145	0.4
ATPAF2	0.62	-0.135	0.02	-0.145	0.095	-0.25	-0.135	0	-0.075	-0.125	-0.12	-0.235	-0.135	0.01	-0.41	0.205	0.04	-0.195	-0.175	-0.12	-0.19	-0.325	-0.15	0.04	-0.285	-0.285	-0.315	-0.325	-0.195	-0.28	-0.9	-0.29	-0.28	-0.275	-0.03	-0.275	-0.165	-0.225	0.06	0.14	-0.135	-0.215	0.1	-0.095	-0.335	-0.3	-0.28	-0.155	-0.16
ATPBD1B	0.03	0.06	0.1	-0.04	-0.065	-0.18	-0.115	-0.005	0.005	0.11	-0.2	0.115	0.025	0.08	0.09	0.435	0.11	0.08	0.12	-0.28	0.09	-0.07	0.085	-0.09	-0.095	-0.005	0.075	-0.17	0.125	0.11	-0.015	0.035	-0.15	-0.1	0.03	-0.01	0.09	-0.265	-0.02	-0.33	-0.255	-0.07	0.11	0.21	0.025	0.395	0.24	0.325	-0.015
ATPBD1C	0.45	0.24	0.08	0.07	NA	-0.87	0.48	0.05	-0.85	0.03	0.02	0.01	-1.5	-0.23	-0.05	-0.32	-0.62	-0.2	-0.22	0.5	0.43	-0.04	-0.39	0.18	0.06	-0.72	0.46	0.85	0.13	0.32	0.25	-0.76	-0.25	0.27	-0.16	0.41	-0.01	0.97	-0.01	0.25	0.82	0.19	-0.98	0.18	1.24	-0.9	-0.33	NA	0.33
ATPBD3	-0.43	-0.24	NA	0.07	-0.15	-0.04	-0.24	-0.12	0.3	-0.22	0.04	-0.01	0.06	0.24	-0.18	-0.31	0.5	-0.03	-0.61	0.77	-0.8	0.14	-0.17	0.41	-0.98	-0.31	-0.36	-0.62	-0.55	-0.49	-0.1	-0.12	0.28	-0.51	0.19	-0.4	-0.36	-0.26	0.17	-0.04	-0.23	-0.17	0.02	-0.33	-0.79	-0.54	-0.63	NA	0.55
ATPBD4	0.04	-0.17	0.04	0.08	-0.06	0.04	-0.17	0.06	-0.17	-0.4	-0.02	-0.24	0.71	0	-0.29	-0.34	-0.2	-0.12	0.17	0.13	0.48	0.19	0.1	0.14	0.42	0.33	-0.03	0.28	-0.27	-0.13	0.71	0.46	0.34	0.08	0.01	0.16	0.06	0.53	-0.09	-0.03	0.03	-0.07	0.21	0.01	1.4	-0.28	-0.38	NA	0.25
ATPIF1	0.37	0.2	0.42	0.12	-0.31	0.09	0.53	0.12	-0.26	0.47	0.47	0.11	-0.4	-0.15	0.16	-0.17	-0.35	-0.04	-0.03	-0.01	0.37	-0.21	-0.43	-0.35	-0.17	-0.2	0.46	0.84	0.26	0.39	0.1	-0.19	0.04	0.26	-0.28	0.27	0.09	0.28	-0.06	0.26	0.08	0.46	-0.09	0.58	0.55	0.53	0.29	0.18	0.22
ATRN	0.08	-0.19	-0.09	-0.04	0.28	0.09	-0.36	0.31	-0.33	-0.34	0.23	0.33	-0.18	-0.22	0.05	-0.15	-0.27	-0.18	-0.22	0.72	-0.8	0.28	-0.19	0.08	-1.06	-0.43	-0.03	-0.6	0.24	-0.09	-0.05	0.6	0.04	-0.47	-0.64	-0.41	-0.22	0	-0.5	-0.95	-0.06	-0.15	0.09	0.15	-0.55	-0.03	-0.02	0.3	0.23
ATRNL1	0.155	0	-0.29	0.1	0.475	0.235	-0.05	-0.04	0.095	0.015	0.065	0.155	0.205	0.08	0.04	0.105	0.13	-0.015	-0.13	0.015	-0.055	0.15	0.095	-0.01	-0.11	-0.205	-0.225	-0.43	-0.03	-0.14	-0.08	-0.045	0.055	-0.08	0.12	0.015	-0.115	-0.11	0.08	-0.38	-0.08	-0.06	0.32	-0.4	-0.31	0.15	-0.105	0.075	-0.245
ATRX	0.26	0.025	0.075	0.41	0.185	0.185	-0.04	0.45	0.015	-0.245	0.055	0.055	0.06	-0.035	0.145	0.28	0.18	0.08	-0.24	0.035	-0.345	0.38	0.235	-0.085	-0.36	0.02	-0.17	-0.375	-0.23	-0.09	0.08	-0.47	0.15	-0.075	0.005	-0.105	-0.245	-0.145	0.06	-0.055	0.365	0.04	0.065	-0.06	-0.275	-0.315	-0.1	-0.445	-0.295
ATXN1	0.66	-0.06	0.08	0.05	-0.61	0.03	-0.065	-0.21	0.095	-0.1	-0.15	-0.245	-0.995	-0.155	-0.085	0.255	-0.2	-0.185	0.055	-1.105	0.1	-0.64	-0.47	-0.28	0.21	-0.045	-0.07	-0.045	0.105	0.04	-0.195	0.165	-0.08	0.06	0.18	-0.115	-0.165	-0.18	-0.045	-0.125	-0.08	0.015	-0.12	0.17	-0.525	-0.33	0.37	-1.4	0.08
ATXN10	-0.08	0.09	0.09	0.23	0.26	0.18	0.17	-0.04	0.15	0.14	0.07	0.18	0.01	0.05	0.1	-0.1	0.11	0.08	-0.05	-0.15	0.08	0.29	-0.12	-0.02	-0.16	-0.07	0.2	0.23	-0.04	0.06	0.2	-0.09	-0.14	0.11	-0.08	0.24	-0.28	0.34	0.27	-0.18	0.26	0.22	0.54	0.14	0.35	0.1	-0.09	-0.22	-0.02
ATXN2	NA	0.08	0.17	0.25	0.7	0.27	-0.11	0.14	-0.15	0.05	0.18	0.1	-0.07	-0.12	-0.27	-0.69	0.07	0.13	0.03	0.71	0.36	0.26	-0.19	0.08	0.54	0.21	-0.31	0	-0.2	-0.44	0.53	0.57	0.12	-0.02	0.47	0.1	-0.03	0.59	0.29	0.13	0.45	0.33	0.22	-0.27	1.28	0.35	0.67	NA	0.57
ATXN2L	-0.245	0.11	-0.215	-0.245	0.105	-0.185	0.165	-0.14	0.21	0.055	0.15	0.09	0.195	0.17	-0.055	-0.2	0.24	0.085	0.02	0.265	0.025	0.055	0.285	0.11	0.03	0.13	0.095	-0.03	0.065	0.08	0.075	-0.22	0.01	0.01	0.095	-0.135	0.205	-0.115	0.12	0.155	0.12	0.14	0.275	-0.075	-0.3	0.125	0.015	-0.01	0.165
ATXN3	NA	0.13	0.09	0.54	-0.31	0.68	0.23	-0.11	-0.08	0.23	0.03	0.25	-0.58	0.07	NA	-0.43	0.08	0.05	-0.86	0.38	NA	-0.32	-0.87	0.75	-0.83	-0.26	0.57	0.77	-0.08	-0.14	0.09	NA	NA	-0.32	-0.2	0.12	-0.04	0.15	0.1	0.38	-0.55	-0.31	1.55	0.12	NA	NA	NA	NA	NA
ATXN3L	-0.52	-0.33	0.16	-0.09	0.1	-0.39	-0.16	-0.33	-0.17	0.23	-0.09	-0.24	-0.16	-0.19	-0.63	1.33	-0.32	-0.15	-0.18	-0.65	0	-0.13	-0.17	-0.7	0.19	0.09	-0.13	-0.02	-0.09	-0.15	-0.05	-0.71	-0.83	-0.21	-0.04	-0.14	-0.38	-0.43	-0.24	0.01	0.13	-0.14	-0.08	0.06	-0.43	-0.12	-0.35	-0.64	-0.43
ATXN7	-0.03	-0.26	0.1	0.26	-0.2	0.28	-0.13	-0.11	0.08	-0.27	-0.06	0	0.07	-0.18	0.15	0.44	0.1	0.06	-0.3	-0.27	-0.43	0.12	-0.26	0.11	-0.49	-0.25	-0.02	-0.26	-0.24	-0.06	-0.26	-0.21	-0.38	-0.13	-0.19	0.04	-0.15	-0.22	-0.21	-0.5	-0.2	-0.05	0.16	-0.26	-0.19	-0.23	-0.39	-0.27	-0.14
ATXN7L1	0.285	0.025	-0.115	0.055	-0.085	0.105	-0.055	-0.045	-0.085	-0.07	0.11	0.06	0.24	-0.06	0.05	0.065	-0.115	0.065	0.2	-0.1	0.12	-0.16	0.23	0.14	0.255	0.265	-0.01	0.135	0.04	0.05	-0.36	-0.035	-0.045	0.145	0.08	0.065	-0.02	0	0.045	0.09	0.015	-0.055	-0.31	0.17	0.21	0.005	0.24	-0.02	0.07
ATXN7L3	NA	NA	NA	-0.53	NA	NA	-0.6	0.45	NA	NA	NA	NA	NA	NA	NA	-0.25	NA	0.16	NA	-0.12	NA	NA	-0.11	-0.75	NA	NA	NA	NA	NA	NA	NA	-0.64	NA	0.53	0.41	NA	-0.14	0.25	NA	NA	NA	0.15	NA	-0.03	NA	NA	NA	NA	NA
ATXN8OS	0.79	-0.17	-0.39	0.11	-0.35	0.13	-0.18	0.05	0.23	-0.18	-0.02	0.21	0.12	0.09	0.26	0.04	0.18	0.19	0.19	-0.39	0.16	0.15	0.32	0.37	0.06	0.06	-0.25	-0.24	0.16	0.18	-0.18	-0.1	0.22	-0.07	0.07	0.23	-0.06	-0.25	-0.09	-0.55	-0.81	-0.09	0.32	-0.04	-0.47	-0.25	0.36	NA	NA
AUH	-0.01	0.58	-0.01	0.2	0.09	0.39	0.56	0.02	-0.25	0.45	0.24	0.39	-0.27	0.21	-0.32	-0.45	0.32	0.14	-0.04	0.68	-0.06	0.63	-0.12	0.29	0.11	0.03	0.41	0.73	-0.38	0.36	0.31	1.21	0.95	0.76	-0.19	-0.66	-0.25	-0.41	0.23	0.59	0.01	0.11	-0.52	1	0.73	0.36	0.62	1.43	NA
AUP1	-0.23	-0.01	-0.3	-0.27	-0.38	-0.11	0.08	0.05	-0.31	0.11	0.19	-0.01	-0.22	-0.02	0.09	0.08	-0.38	-0.05	-0.07	-0.38	-0.03	0.05	-0.37	0.03	-0.13	-0.15	0.12	0.21	-0.01	0.04	-0.1	-0.38	-0.04	0.16	-0.29	-0.07	-0.29	-0.19	-0.1	-0.14	-0.11	0.16	-0.12	-0.04	0.34	-0.17	-0.61	-0.85	-0.35
AURKA	NA	0.42	NA	0.81	-0.07	0.15	0.36	NA	0.35	0.32	0.34	0.48	-0.98	0.17	1.26	NA	0.21	0.25	-0.17	0.5	-0.29	NA	NA	NA	-0.46	NA	0.37	0.8	0.26	0.39	NA	NA	0.16	0.23	0.2	-0.25	0.08	0.11	0.3	0.31	1.65	0.43	NA	0.03	NA	NA	NA	NA	NA
AURKAIP1	-0.18	0.24	0.22	-0.31	-0.22	-0.49	0.31	-0.62	-0.1	0.19	0.26	-0.07	-0.6	-0.15	-0.26	0.53	0.07	-0.03	0.13	-0.29	-0.11	0.13	0.27	-0.7	0.07	0.25	-0.16	0.21	-0.02	0.13	-0.58	-0.41	-0.24	0.09	-0.01	0.05	0.02	-0.41	0.08	-0.03	-0.22	0.03	0.26	-0.06	-0.55	-0.07	-0.01	-0.97	0.21
AURKB	0.13	-0.07	-0.43	-0.11	0.09	-0.3	0.33	0.12	-0.15	-0.03	0.15	-0.07	-0.1	0.2	-0.06	-0.29	-0.12	-0.01	-0.14	0.11	0.21	0.03	-0.09	-0.13	0.61	0.08	0.13	0.46	0	0.04	0.15	0.1	0.18	0.33	0.19	0.01	0.14	-0.09	0.11	0.18	0.12	0.1	-0.51	0.16	0.35	0.25	0.34	0.29	0.63
AURKC	0.69	-0.31	0.33	-0.02	0.05	0.36	-0.76	0.33	-0.51	-0.62	-0.15	0.15	-0.01	-0.32	0.16	-0.3	-0.38	-0.36	-0.32	0.03	-0.39	0.32	-0.04	0.03	-0.73	-0.22	-0.41	-0.83	-0.07	-0.34	0.07	0.94	0.44	-0.78	-0.62	-0.74	-0.32	0.11	-0.69	-1.06	0.13	-0.36	0.04	0.08	0.06	-0.08	-0.02	0.68	0.01
AUTS2	-0.14	0.01	-0.05	-0.28	-0.43	0.05	0.01	0.02	0.04	-0.11	0.17	0.08	0.05	-0.06	0.47	0.25	-0.09	-0.05	0.01	-0.34	-0.17	-0.29	0.41	-0.1	-0.23	NA	0.1	0.26	0	0.03	0.08	-0.93	-0.11	0.06	0	-0.12	0.06	0.24	-0.01	0.13	0.62	-0.15	-0.25	-0.19	0.26	0.41	0.84	-0.61	-0.2
AVEN	-0.07	-0.42	0.16	-0.04	0.29	0.01	-0.24	-0.03	0.56	-0.38	-0.2	0.08	-0.16	0.02	-0.01	0.33	0.33	0.06	-0.65	-0.01	-0.55	0.31	-0.03	-0.01	-0.73	-0.24	-0.08	-0.79	-0.5	-0.23	0.11	-0.02	-0.01	-0.33	-0.03	-0.31	-0.58	-0.44	-0.02	-0.86	-0.18	-0.11	0.13	-0.5	-0.28	-0.73	-0.7	-1.07	-0.7
AVIL	0.04	-0.416667	-0.0666667	-0.326667	0.0366667	-0.0233333	-0.363333	0.0666667	-0.306667	-0.36	-0.186667	-0.0433333	-0.266667	-0.303333	-0.563333	0.273333	-0.3	-0.343333	-0.31	-0.12	-0.645	-0.203333	-0.276667	-0.203333	0.136667	-0.555	-0.26	-0.493333	-0.323333	-0.353333	0.0866667	-0.246667	-0.26	-0.423333	-0.436667	-0.206667	-0.343333	-0.343333	-0.276667	-0.486667	-0.0333333	-0.413333	-0.536667	-0.34	-0.486667	-1.15	-0.71	-0.23	0.08
AVP	0.295	0.08	0.245	0.115	0.135	0.01	-0.03	0.075	0.14	0.345	0.055	-0.085	-0.11	0.06	-0.235	0.01	0.235	0.21	-0.245	0.18	-0.085	0.24	-0.165	-0.005	0.105	-0.14	-0.01	0.03	0.035	-0.12	0.035	-0.005	-0.02	-0.145	0.37	0.08	-0.07	-0.01	0.035	0.12	-0.035	0.02	0.25	0.005	-0.11	-0.295	-0.135	-0.085	-0.04
AVPI1	-0.37	-0.14	NA	0.03	0.37	0.31	-0.09	0.12	-0.17	0.11	-0.11	0.23	-0.71	-0.01	NA	0.06	-0.05	0.15	-0.32	-0.04	-0.39	-1.02	-0.24	NA	0.08	0.18	-0.1	0.27	0.05	-0.12	-0.58	-0.9	-0.23	0.11	-0.14	-0.02	-0.04	0.01	-0.13	0.21	0.29	-0.02	0.34	-0.03	NA	-0.68	NA	NA	-1.12
AVPR1A	0.18	0.07	0.39	0.22	-0.35	-0.13	-0.09	-0.09	0.58	0.21	0.16	0.16	0.06	0.02	0.06	0.18	0.11	0.34	-0.13	1.37	0.05	-0.08	0.13	-0.46	0.19	NA	0.19	0.14	0.32	0.2	0.35	0.31	0.05	0.35	0.27	0.45	0.07	0.24	0.14	0	0.11	0.29	-0.16	0.26	0.18	0.07	NA	NA	0.43
AVPR1B	-0.04	-0.4	0.04	-0.13	-0.14	0.08	-0.51	0.24	-0.17	-0.47	-0.25	0.3	0.36	-0.2	0.26	-0.62	-0.3	-0.08	0.16	0.21	0.36	0.23	0.37	0.2	0.05	0.39	-0.1	-0.44	0.24	0.16	-0.16	0.57	0.35	-0.11	-0.35	-0.35	-0.18	-0.27	-0.47	-0.69	-0.6	-0.48	-0.05	0.33	-0.08	-0.01	0.45	0.99	-0.28
AVPR2	-0.43	-0.75	-0.33	-0.29	-0.19	-0.36	-0.78	-0.41	-0.16	-0.66	-0.44	-0.54	-0.65	-0.51	-0.42	0.62	-0.24	-0.53	-0.95	-0.19	-1.18	-0.26	-0.61	-0.37	-1.11	-0.84	-0.61	-1.11	-0.7	-0.71	-0.36	-0.25	-0.27	-0.84	-0.86	-0.66	-0.67	-0.76	-0.77	-0.95	-0.42	-0.74	-0.36	-0.68	-0.87	-0.86	-0.61	-0.26	-0.72
AXIN1	-0.43	0.08	-0.44	-0.07	-0.26	-0.01	-0.09	-0.36	0.13	-0.01	-0.36	0.1	-0.18	-0.07	0.08	0.56	0.04	0.11	-0.22	-0.22	NA	0.06	-0.04	-0.18	NA	NA	-0.22	-0.27	0.03	0.03	-0.62	-0.25	-0.12	0.1	0.04	-0.08	0.09	-0.41	0.08	-0.03	-0.77	-0.01	0.19	-0.22	-0.18	-0.44	-0.52	0.12	-0.31
AXIN2	0.666667	-0.05	0.133333	-0.0433333	0.0233333	-0.0533333	-1.73e-18	0.02	-0.0666667	0.00666667	0.06	-0.0433333	-0.0233333	-0.0833333	-0.0466667	0.373333	-0.00333333	-0.0166667	0.05	-0.14	0.0966667	-0.04	-0.03	-0.306667	0.03	0.0266667	-0.0166667	0.0166667	-0.0533333	-0.0366667	-0.09	-0.236667	-0.283333	0.0933333	0.01	0.03	-0.0533333	-0.0533333	-0.08	0.03	0.01	0.0533333	-0.05	-0.133333	0.0233333	0.226667	-0.263333	0.0233333	-0.11
AXL	-0.24	-0.11	0.05	0.25	0.05	0.14	-0.34	-0.2	-0.21	-0.1	-0.16	-0.31	-0.07	-0.29	0.02	0.14	-0.29	-0.32	-0.35	0.1	-0.4	-0.24	-0.39	0.21	-0.42	-0.42	-0.24	0.26	-0.14	-0.2	0.32	-0.21	0.42	0.01	-0.31	-0.14	-0.35	0.27	-0.38	-0.13	0.04	-0.3	0.02	-0.3	0.32	-0.07	-0.14	0	0.01
AXUD1	0.06	0.25	-0.36	-0.08	-0.44	0.17	-0.09	-0.07	-0.6	0.11	-0.18	-0.18	0.07	0	-0.1	0.21	-0.22	0.13	0.12	-0.13	0.26	-0.82	-0.18	-0.4	0.41	0.13	-0.27	-0.04	-0.09	-0.01	0.16	-0.52	-0.13	0.07	0.14	-0.04	-0.24	0.08	-0.17	0.08	-0.01	0.09	0.09	-0.05	-0.53	0.43	-0.44	0.28	0.01
AYTL1	0.25	-0.3	0.06	-0.09	0.65	-0.34	0.27	0.03	-0.14	-0.17	0.08	-0.37	-0.1	-0.03	0.03	0.21	0.1	-0.11	0.25	0.17	0.03	-0.06	-0.09	0.32	-0.17	-0.07	0	-0.01	-0.1	-0.19	0.11	-0.02	-0.18	-0.34	-0.32	0.11	-0.25	0.27	-0.07	0.13	-0.4	-0.23	0	-0.35	-0.09	-0.06	0.17	-0.25	-0.07
AYTL2	NA	0.37	NA	0.4	0.39	NA	NA	0.36	0.05	0.39	0.82	0.16	-0.72	0.63	0.72	NA	0.26	0.18	-0.44	1.04	-0.32	-0.11	-0.76	NA	-0.1	-0.19	0.35	0.23	0.25	0.43	NA	1.34	-2.47	0.12	0.34	0.71	0.22	NA	0.27	-0.28	NA	0.05	NA	0.57	NA	NA	NA	NA	NA
AZGP1	1.16	0.1	0.17	0.14	0.04	0.15	0.09	-0.05	0.23	0.01	0.31	0.03	0.06	0.13	0.25	-0.07	0.14	0.16	0.15	0.15	-0.19	0.07	-0.21	0.08	0.02	0.13	0.23	0.17	0.3	0.3	0.4	0.21	0.73	0.34	0.16	0.29	0.11	0.27	0.14	0.32	0.1	0.15	0.28	0.25	0.35	0.16	0.52	0.1	0.39
AZI1	0.955	-0.025	0.02	0.065	0.3	-0.005	-0.11	0.13	-0.05	-0.03	0.125	0.14	-0.115	0.005	0.06	0.03	-0.015	-0.195	-0.06	-0.05	-0.245	0.685	0.05	-0.13	-0.445	0.12	-0.22	-0.3	0.03	-0.11	0.355	0.37	0.14	-0.2	-0.11	-0.165	-0.06	-0.05	-0.095	-0.325	0.415	-0.155	-0.015	0.31	-0.325	0.445	0.11	-0.14	0.2
AZI2	-0.78	0.1	NA	0.58	0.02	0	0.59	0	0.14	0.16	0.14	0.09	-0.3	-0.01	0.59	-0.74	-0.14	0.01	-0.25	0.98	-0.13	0.07	-0.41	0.41	-0.22	-0.32	0.48	0.93	0.1	0.06	0.74	-0.06	0.92	0.38	-0.08	0.36	0.03	0.14	0.09	0.25	0.56	0.15	0.5	0.44	0.53	0.05	0.71	NA	0.08
AZIN1	1.16	0.04	0.41	0.34	-0.28	-0.1	0.26	0.29	-0.35	0.1	0.03	-0.18	-0.74	-0.1	0.4	0.11	-0.4	-0.01	-0.14	0.05	0.44	-0.53	-0.41	-0.06	0.18	-0.01	0.17	0.99	0.25	0.24	0.18	0.11	0.17	0.04	0.03	0.4	0.19	0.03	-0.31	0.37	-0.06	-0.06	0.49	0.46	0.69	-1.03	1.43	NA	NA
AZU1	0.85	-0.16	-0.09	0.14	0.03	0.47	0.15	0.37	0.38	0.05	0.02	0.06	-0.35	0.3	0.34	-0.1	0.23	-0.01	-0.18	-0.21	-0.16	0.21	-0.18	0.15	-0.14	-0.11	0.35	0.05	0.14	-0.06	0.06	0.12	-0.03	-0.06	0.21	-0.12	-0.11	0.2	0.32	-0.02	-0.11	-0.16	0.21	0.12	0.05	-0.13	0.06	0.31	-0.25
B2M	0.3656	-0.9132	0.6524	-0.484	-0.3288	-0.6996	-0.858	-0.2344	-1.842	-0.73	-0.9004	-1.372	-0.3968	-1.648	-0.862	-0.3004	-1.7568	-1.4512	-0.1572	0.0316	0.348	-0.5064	-0.9624	-1.2036	-0.7124	-0.9208	-0.378	0.0756	-0.5256	-0.4664	-0.3648	0.616	0.0852	-0.4688	-1.4128	-0.7304	-0.3648	0.0148	-1.1456	-0.3188	0.2172	-1.1084	-0.9904	-0.2228	0.5984	-0.4988	0.5276	0.3856	-0.0656
B3GALNT1	-0.2	0.02	0.31	-0.02	-0.33	-0.08	0.08	-0.03	0.2	-0.08	0.26	0.2	-0.04	-0.03	-0.1	-0.34	-0.05	0.16	-0.09	-0.04	-0.12	0.16	-0.55	0.17	-0.16	0.19	0.04	0.28	0.15	0.22	0.34	0.18	0.11	0.33	-0.15	0.06	0.01	-0.09	0.16	0.27	-0.1	0.13	0.08	-0.1	0.43	0.13	0.15	-0.62	0
B3GALT1	-0.27	-0.04	NA	-0.44	0.01	0.31	-0.09	0.41	0.16	0.11	0	0.1	-0.08	0.25	0.11	0.12	0.61	0.22	-0.34	0.12	0.09	-0.06	0.19	0.59	0.06	NA	0.24	0.29	-0.09	-0.1	-0.04	-0.15	-0.53	-0.06	0.13	-0.24	-0.37	-0.19	0.42	0.32	0.24	0.09	0.31	-0.01	NA	0.19	-0.66	NA	-0.11
B3GALT2	-0.05	-0.01	0.06	0.17	0.31	0.33	-0.08	-0.15	0.45	-0.62	0.05	0.07	0.11	0.23	0.05	-0.51	0.4	0.06	-0.31	0.3	0.13	0.21	0.13	0.42	0.11	0.11	0.1	-0.45	-0.39	-0.23	-0.01	0.44	0.37	-0.17	0.08	-0.45	0.18	-0.33	0.13	-0.28	-0.32	-0.1	0.3	-0.35	-0.11	0.01	-0.27	0.21	0.01
B3GALT4	0.695	0.075	-0.04	0.02	-0.07	0.1	0.12	0.345	-0.085	0.125	0.11	-0.095	-0.045	0.015	0.185	-0.015	-0.165	-0.02	-0.03	-0.01	-0.005	0.435	-0.2	-0.105	0.065	-0.015	0.065	0.295	0.17	0.1	0.05	0.215	-0.02	0.155	-0.015	0.12	-0.045	0.16	-0.145	0.015	-0.25	0.085	0.085	0.245	-0.025	0.38	-0.04	-0.025	0.05
B3GALT5	-0.33	-0.18	0.12	0.06	-0.2	0.41	-0.21	0.12	-0.11	0.07	-0.23	-0.04	0.29	-0.11	0.06	0.12	-0.01	-0.01	-0.05	-0.16	0.22	-0.35	-0.15	-0.61	-0.04	0.02	-0.08	-0.03	-0.09	-0.19	-0.01	0.39	-0.17	-0.21	0.02	0.18	0.07	0.29	0.08	-0.07	-0.2	-0.39	-0.09	0.1	0.17	-0.08	-0.2	0.03	-0.06
B3GALTL	NA	0.11	-0.87	-0.51	0.05	0.73	0.35	0.31	0.23	-0.04	0.18	-0.33	0.57	0.07	-0.24	-1.83	-0.13	-0.25	0.33	0.8	0.91	-0.04	0.52	0.79	0.78	0.57	0.09	0.45	0.08	0.18	-0.5	-0.28	1.5	0.33	0.41	0.88	0.13	0.58	0.44	0.68	0.47	0.21	NA	NA	1.2	0.63	NA	NA	0.72
B3GAT1	-0.14	0.08	-0.07	0.38	-0.54	0.48	0.1	0.06	0.38	0.14	0.15	-0.04	-0.15	0.18	0.02	0.07	0.16	0.22	-0.18	0.17	-0.01	-0.04	-0.04	-0.01	0.1	-0.09	0.13	0.17	0.09	0.31	0.06	0.13	0.09	0.17	0.29	0.13	-0.03	0.29	0.14	0.29	-0.02	0.09	-0.03	0.08	0.39	-0.23	0.09	-0.97	0.16
B3GAT2	-0.25	0.3	-0.21	0	-0.4	-0.04	-0.06	-0.08	0.28	0.08	0.01	-0.05	0.22	0.11	-0.07	0.41	0.21	0.04	0.03	-0.29	0.22	-0.06	0.03	-0.05	0.07	0.05	-0.17	-0.03	0.06	0.02	-0.15	-0.51	-0.18	0.07	0.33	0.04	0.16	-0.24	0.18	0.2	-0.21	0.04	-0.15	-0.22	0.06	0.21	0.07	-0.04	-0.06
B3GAT3	0.54	-0.19	0.05	-0.1	-0.64	-0.21	-0.07	0.04	0.06	0	-0.05	-0.02	0.1	-0.17	0.05	0.07	0.09	0.11	-0.04	-0.4	-0.08	-0.28	-0.07	0.01	0.19	-0.02	-0.12	-0.13	0.14	0.1	0.16	-0.48	-0.34	-0.03	0.02	-0.12	-0.2	-0.27	-0.18	-0.25	-0.23	-0.09	-0.12	-0.04	0.06	-0.08	0.18	-0.41	0.14
B3GNT1	NA	0.09	NA	0.68	-0.42	0.84	0.03	-0.25	-0.46	-0.19	0.33	0.04	NA	-0.47	0.92	-0.42	-0.83	-0.24	0.27	NA	0.38	0.25	-0.16	0.46	0.69	0.18	0.34	1.17	0.26	0.28	0.07	1.24	0.3	0.14	-0.37	0.47	0.46	-0.11	-0.31	0.12	NA	0.58	NA	0.99	NA	NA	NA	NA	0.47
B3GNT2	-0.35	-0.19	0.02	-0.22	0.19	-0.33	-0.05	-0.18	-0.44	-0.18	-0.08	-0.35	-0.16	-0.21	-0.16	0.06	-0.25	-0.37	-0.06	-0.57	0.28	-0.23	-0.2	-0.5	0.12	-0.57	-0.06	0.19	-0.03	-0.01	-0.03	0.09	-0.19	-0.18	0.03	-0.05	-0.27	0.15	-0.17	-0.12	-0.13	-0.14	-0.49	-0.23	0.11	-0.12	-0.05	-0.16	-0.21
B3GNT3	0.17	0.18	0.12	0.74	0.64	0.73	0.2	0.47	0.77	0.28	0.38	0.28	-0.15	0.29	0.39	-0.79	0.57	0.3	-0.1	0.42	-0.37	0.55	0.16	0.61	-0.35	-0.05	0.43	-0.09	0.18	0.09	0.68	0.38	0.68	-0.01	0.35	0.11	0.16	0.5	0.39	0.23	0.19	-0.1	0.33	0.23	0.06	-0.08	0.02	0.65	0.39
B3GNT4	-0.21	-0.12	0.02	-0.44	0.2	-0.32	-0.34	-0.44	-0.12	-0.31	-0.17	-0.2	0.08	-0.24	-0.4	-0.2	-0.14	-0.19	-0.54	0.23	-0.45	0.18	0.04	0.04	-0.62	-0.48	-0.35	-0.54	-0.29	-0.29	0.48	-0.06	0.15	-0.14	-0.21	-0.38	-0.25	-0.24	-0.47	-0.61	0.49	-0.3	-0.12	-0.34	-0.23	-0.16	-0.2	0.12	-0.01
B3GNT5	-1.99	-0.17	NA	-0.21	NA	NA	-0.64	-1.25	-0.51	NA	-0.27	-0.42	-0.04	-0.07	NA	0.11	-0.2	-0.24	-0.43	-0.58	0.38	NA	-0.67	-1.84	-0.19	-0.3	-0.97	0.04	-0.08	-0.32	NA	-0.74	-0.44	-0.24	0.12	0.4	-0.37	0.19	-0.18	1.21	0.02	0.1	1	0.11	NA	NA	NA	NA	NA
B3GNT7	-0.14	-0.17	0.1	0.05	0.22	0.09	-0.11	0.11	0.18	-0.09	0.02	0.01	0.22	0.28	-0.01	0.23	0.5	0.03	-0.18	0.6	-0.28	0.25	0.25	0.28	-0.05	0.02	0.01	-0.58	-0.09	0.08	-0.39	0	-0.14	-0.08	0.27	-0.02	-0.23	0.09	0.29	0.41	0.31	-0.05	0.41	-0.13	-0.53	-0.43	0.28	0.7	0.56
B3GNT8	0.29	-1.02	-0.29	-1.23	-1.27	-0.65	-1.26	-0.72	-0.38	-0.8	-0.61	-0.72	-0.19	-0.93	-0.77	1	-0.49	-0.94	-0.69	-0.86	-1.06	-0.51	-0.16	-0.5	-1.42	-0.79	-0.82	-1.41	-0.82	-1.17	-0.46	-0.52	-1.06	-1.32	-1.53	-0.9	-1.08	-1.18	-0.98	-1.1	0.03	-1.28	-0.36	-0.84	-0.69	-0.83	-0.89	-0.42	-1.16
B3GNTL1	0.04	0.21	-0.1	0.11	0.14	0.25	0.06	0.13	0.25	0.04	0.15	0.2	0.29	0.09	0.06	0.23	0.27	0.15	0.23	0.1	0.04	0.06	0	0.07	0.01	0.13	0.04	-0.12	0.29	0.11	0.06	-0.15	-0.25	0.08	0.07	-0.07	0.18	-0.05	0.1	-0.14	-0.27	0.06	0.09	0.13	-0.02	0.07	0.06	-0.11	-0.19
B4GALNT1	0.38	-0.39	-0.52	-0.44	0.26	0.3	-0.42	0.37	-0.06	-0.04	1.05	-0.08	-0.25	-0.05	0.57	-0.42	-0.33	-0.3	-0.26	-0.91	-0.3	0.14	-0.32	0.26	0.33	-0.24	-0.21	0.09	-0.26	-0.55	-0.93	-0.53	0.15	-0.12	-0.13	-0.13	-0.1	0.4	0	-0.02	0.05	-0.08	NA	-0.05	1.13	0.02	-0.44	NA	0.13
B4GALT1	0.02	0.05	-0.41	-0.05	0.52	0	0.25	-0.14	0.22	0.16	0.13	0.08	0.12	0.16	-0.12	-0.27	0.2	0.14	-0.03	0.6	-0.11	-0.2	-0.57	-0.22	-0.33	NA	0.33	0.25	0.22	0.26	0.1	0.57	-0.4	0.19	0.24	0.51	-0.04	0.23	0.38	0.89	-0.07	0.29	-0.59	0.09	0.64	0.36	0.88	NA	-0.38
B4GALT2	-0.055	-0.15	-0.195	-0.125	0.055	-0.245	-0.07	-0.23	0.01	-0.24	-0.22	-0.3	-0.205	0.095	-0.045	-0.22	0.135	-0.31	-0.505	0.245	-0.62	-0.075	-0.13	-0.31	-0.39	-0.42	-0.27	-0.3	-0.155	-0.235	0.015	-0.15	-0.095	-0.265	-0.01	-0.19	-0.04	0.005	0.1	0.455	-0.075	-0.27	-0.27	-0.365	0.075	0.19	-0.63	0.07	-0.215
B4GALT3	0.325	-0.285	-0.03	0.195	0.05	0.055	-0.135	0.195	-0.165	-0.12	-0.335	-0.19	0.045	-0.145	0.05	-0.055	-0.255	-0.135	-0.025	-0.19	-0.03	0.02	0.06	0.135	-0.095	0.17	-0.055	-0.09	-0.025	-0.025	0.14	0.06	-0.06	-0.235	-0.135	-0.07	-0.195	0.025	-0.235	-0.56	-0.135	-0.405	-0.05	0.015	0.04	-0.2	-0.575	0.685	-0.095
B4GALT4	0.15	0.27	-0.37	0.31	-0.13	-0.23	0.07	0.04	-0.07	-0.21	-0.13	-0.02	0.01	-0.26	-0.06	-0.2	-0.26	0.03	0.01	-0.51	0.23	NA	-0.08	-0.42	0.12	0.17	0.05	0.13	0.26	0.35	-0.34	-0.06	-0.09	0.21	-0.24	0.17	-0.1	-0.06	0.02	-0.05	-0.24	0.2	-0.11	0.56	0.85	-0.83	NA	NA	-0.25
B4GALT5	-0.11	0.04	-0.16	-0.16	-0.21	-0.03	-0.22	-0.07	0.12	-0.27	0.1	-0.13	-0.46	-0.22	0.11	0.7	-0.04	-0.06	-0.15	-0.17	0.01	-0.02	-0.23	-0.18	-0.5	-0.34	-0.17	-0.41	-0.3	-0.22	0.04	-0.13	-0.19	-0.16	-0.03	-0.32	-0.21	-0.1	-0.18	-0.21	-0.32	-0.02	-0.19	-0.32	-0.52	-0.22	0.17	-0.42	-0.14
B4GALT6	0.06	-0.08	-0.15	0.58	0.42	0.9	0.53	-0.4	-0.3	0.3	0.34	-0.12	0.46	-0.12	NA	-0.23	0.19	-0.14	-0.27	1.07	NA	-0.29	0.09	NA	-0.28	-0.17	-0.21	0.05	-0.21	0.02	NA	0.47	0.36	-1.42	0	0.42	0.19	-0.47	0.28	0.17	-1.56	0.16	0.89	0.19	1.29	0.94	NA	NA	0.13
B4GALT7	0.63	0.01	0.4	0.21	0.11	0.39	0.22	0.26	-0.05	0	0.23	0.13	-0.38	0.07	0.14	0.22	0.11	0.06	-0.23	-0.1	-0.42	0.37	-0.1	0.2	-0.43	-0.2	0.31	0.12	-0.15	-0.07	0.24	-0.08	-0.09	0.07	-0.12	0.05	-0.12	-0.04	0.06	-0.02	-0.07	-0.02	-0.34	-0.13	-0.3	-0.3	-0.02	0.03	-0.69
BAALC	-0.47	0.03	-0.02	0.2	0.4	0.23	0.29	0.28	0.02	-0.12	-0.12	-0.15	-0.23	-0.12	-0.59	0.03	-0.05	0.05	0.02	-0.5	-0.1	-0.1	0.13	-0.18	0.02	-0.02	-0.11	-0.04	0.11	0.21	-0.5	-0.34	-0.58	0.02	-0.1	-0.12	-0.07	-0.13	0.04	0.18	0.18	-0.11	-0.12	-0.1	0.17	0.72	0.06	0.49	-0.7
BAAT	1.29	0.03	-0.06	0.03	-0.72	0.21	0.1	0.15	0.23	0	0.29	0.15	0.09	-0.07	-0.15	0.49	0.09	0.23	-0.19	-0.18	-0.31	-0.11	-0.02	0.07	-0.14	0.03	0.01	-0.12	0.23	0.31	0.22	-0.3	-0.24	0.05	-0.14	0.12	-0.11	-0.27	-0.07	-0.18	-0.44	0.11	0.27	-0.13	-0.43	-0.05	0.11	-0.5	0.22
BACE1	-0.23	0.05	-0.1	-0.02	-0.29	0.25	0.04	0.12	-0.23	0.2	0.2	0.18	0.41	-0.1	0.18	0.03	0.15	0.24	0.08	-0.02	0.08	-0.09	-0.23	0.14	-0.12	0.01	-0.04	0.23	-0.07	0.21	0.33	-0.14	-0.2	0.04	-0.04	0.07	0.11	0.01	-0.21	-0.28	-0.15	0.16	0.1	0.13	-0.31	0.19	0	-0.35	-0.59
BACE2	0.36	-0.32	-0.32	-0.23	-0.36	-0.12	-0.34	-0.14	-0.55	-0.09	-0.4	-0.72	-0.14	-0.31	-0.23	-0.02	-0.55	-0.36	-0.5	-0.26	-0.11	-0.29	-0.36	-0.33	-0.01	-0.38	-0.46	-0.01	-0.31	-0.45	-0.02	-0.47	-0.41	-0.29	-0.32	-0.16	-0.43	-0.25	-0.46	-0.5	-0.22	-0.42	-0.34	-0.3	0.34	-0.4	-0.3	-0.31	-0.3
BACH1	-0.5	0.095	0.3	-0.02	0.48	-0.33	0.02	0.04	-0.175	-0.02	-0.17	0.19	0.345	-0.11	-0.015	0.375	0.025	0.1	0	0.07	-0.175	0.24	0.145	-0.76	0.125	-0.2	0.14	0.22	0.045	0.025	-0.03	-0.075	-0.255	0.115	0.005	-0.2	-0.26	0.37	0.06	0.15	-0.405	0.005	0.33	0.06	0.04	0.27	0.59	-1.83	0.435
BACH2	-0.06	-0.22	-0.04	-0.03	0.22	0.57	0.04	0.645	0.21	-0.065	-0.035	-0.355	-0.2	0.19	-0.035	-0.21	0.24	-0.105	-0.1	0.25	-0.625	0.06	0.02	0.48	0.12	-0.125	-0.14	-0.195	-0.005	-0.145	0.19	-0.065	0.405	-0.28	0.01	-0.155	-0.02	0.37	0.005	-0.425	0.09	-0.06	-0.05	-0.095	-0.355	0.83	-0.2	0.13	0.11
BAG1	0.13	0.29	0.21	0.39	-0.11	0.26	-0.3	-0.4	-0.68	-0.37	0.24	0.24	-0.12	-0.69	0.01	0.11	-0.42	0.21	-0.44	-0.18	0.26	0	-0.29	0.18	-1.03	-0.28	0.43	-0.19	0.16	0.28	0.06	0.71	-0.1	0.08	-0.33	0.08	0.74	-0.19	-0.49	-0.56	0.49	0.49	0.44	0.73	0.38	0.31	-0.72	-0.34	0.07
BAG2	NA	0.17	0.67	0.95	-0.2	-0.53	0.12	0.72	0.15	0.06	-0.04	0.27	0.35	0.28	-0.35	-0.4	0.33	0.28	-0.04	-0.94	0.16	0.48	NA	-0.59	0.82	0.54	-0.23	0.43	0.49	0.16	-0.98	NA	-1.11	0.44	0.44	0.37	0.19	0.17	0.54	0.8	0.71	0.5	NA	0.12	0.71	0.11	0.07	-0.88	-0.53
BAG3	0.52	-0.67	-0.13	-0.51	-0.34	-0.39	-0.66	-0.34	-0.4	-0.68	-0.49	-0.41	-0.21	-0.7	-0.32	0.31	-0.4	-0.65	-0.61	-0.67	-0.69	-0.06	-0.15	-0.13	-0.9	-0.52	-0.4	-0.76	-0.45	-0.57	0.28	0.07	-0.32	-0.79	-0.85	-0.84	-0.94	-0.41	-0.8	-1.14	-0.2	-0.7	-0.04	-0.32	-0.14	-0.63	-0.41	0.27	-0.49
BAG4	-0.8	0.13	NA	0.07	0.37	0.09	0.35	0.34	0	0.07	0.32	0.18	-0.04	0.13	0.28	-0.4	0.07	-0.1	0.03	0.08	-0.41	0.64	0.09	-0.21	-0.14	-0.84	0.47	0.71	-0.01	0.11	1.03	NA	0.4	0.22	-0.16	0.15	0.01	0.3	0.08	0.21	0.41	0.16	0.6	0.2	0.01	0.44	1.2	NA	NA
BAG5	0.02	-0.11	0.22	-0.17	0.15	-0.12	-0.16	0.14	0.03	-0.16	0.1	0.23	-0.18	0.01	0.19	-0.41	0.21	-0.16	-0.1	0.46	-0.13	0.59	0.03	0.27	-0.35	0	-0.07	-0.34	-0.05	-0.12	-0.17	0.1	0.31	-0.24	-0.17	-0.15	-0.12	0.05	0.07	-0.46	0.24	-0.16	0.05	-0.06	-0.36	0.08	0.27	0.36	-0.06
BAGE	-0.14	0.095	-0.1	-0.155	-0.045	0.335	0.165	0.7	0.05	0.23	0.11	-0.06	0.105	0.095	0.215	-0.22	0.175	0.19	0.125	0.1	0.52	-0.09	-0.245	-0.18	NA	0.53	-0.01	0.275	0.025	-0.085	0.1	-0.32	0.285	0.12	0.09	0.155	-0.1	-0.08	0.155	0.235	-0.8	0.035	0.19	0.05	0.1	-0.225	0.08	0.63	0.6
BAHCC1	0.0866667	-0.1	-0.323333	-0.126667	0.186667	-0.06	-0.166667	-0.0833333	-0.0433333	-0.206667	-0.22	-0.106667	0.133333	-0.376667	-0.0933333	0.436667	-0.16	-0.02	-0.0966667	-0.363333	-0.0733333	-0.123333	0.0733333	-0.0833333	-0.09	-0.0333333	-0.3	-0.453333	-0.116667	-0.256667	-0.0733333	-0.363333	-0.28	-0.183333	-0.146667	-0.186667	-0.13	-0.266667	-0.286667	-0.413333	-0.21	-0.19	-0.103333	-0.173333	-0.256667	-0.5	-0.366667	-0.2	-0.163333
BAHD1	0.05	-0.1	0.12	0.02	-0.59	0.09	-0.22	-0.13	0.73	0	-0.06	0.27	-0.37	-0.21	0	0.49	0.51	0.36	-0.67	0.7	-0.9	0.04	-0.35	0.46	-0.99	-0.68	-0.06	-0.33	0.21	-0.18	-0.44	0.37	-0.11	0.12	0.6	0.01	0.59	0	0.14	-0.07	-0.19	0.31	0.01	0.01	-1.2	-0.27	-0.19	0.12	0.59
BAI1	1.24	0.05	0.13	0.08	-0.32	-0.04	0.26	0.01	0.18	0.18	0.31	-0.03	0.32	0.12	0.1	-0.07	-0.07	0.22	0.16	-0.21	0.3	-0.16	-0.09	0.26	0.48	0.26	0.17	0.3	0.23	0.03	-0.19	-0.24	-0.08	0.24	0.24	0.25	-0.06	0.26	0.08	0.22	0.45	0.23	0	0.02	0.14	-0.39	-0.2	-0.03	-0.01
BAI2	0.01	0.22	0.25	0.33	0.79	0.49	0.33	0.38	1.12	0.16	0.21	0.34	0.64	0.59	0.11	0.62	0.92	0.63	-0.02	0.06	-0.24	0.23	0.42	0.62	-0.32	0	0.49	-0.3	0.05	0.24	0.08	0.14	-0.38	0.09	0.9	0.11	0.37	-0.15	0.67	0.07	-0.05	0.08	0.38	-0.01	-0.26	-0.59	-0.34	0.29	0.13
BAI3	-0.11	-0.77	-0.25	-0.34	-0.29	-0.11	-0.59	-0.17	0	-0.74	-0.47	-0.51	-0.2	-0.7	-0.35	0.45	-0.26	-0.53	-0.67	-0.06	-0.96	-0.16	-0.29	-0.05	-0.93	-0.49	-0.66	-1.22	-0.99	-0.8	-0.29	-0.27	-0.24	-0.71	-0.93	-0.76	-0.58	-0.48	-0.64	-1.12	-0.03	-0.57	0.09	-0.96	-0.67	0.02	0.08	NA	-0.07
BAIAP2	-0.01	-0.34	0.47	-0.19	-0.47	-0.24	-0.23	-0.31	-0.4	0.03	-0.22	-0.57	0.12	-0.34	-0.2	0.2	-0.33	-0.25	-0.14	-0.2	-0.11	0.08	-0.14	-0.11	0	-0.09	-0.39	0.04	-0.16	-0.34	0.3	-0.21	-0.27	-0.03	-0.16	0.07	-0.25	-0.26	-0.44	-0.35	0.39	-0.25	0.17	-0.26	0.25	-0.16	-0.32	-0.13	-0.11
BAIAP2L1	0.325	0.055	0.265	-0.065	0.055	0.04	-0.07	-0.06	0.35	0.055	0.135	-0.165	0.02	0.075	-0.19	0.355	0.2	0.035	-0.08	-0.235	-0.015	-0.045	-0.07	0.195	0.075	0.065	-0.085	0.07	0.02	-0.005	0.145	-0.21	-0.47	-0.03	0.265	-0.145	-0.085	0.195	-0.02	0.335	-0.01	0	0	-0.13	-0.08	0.125	-0.25	-0.18	0.485
BAIAP2L2	-0.116667	-0.0266667	-0.0233333	-0.12	-0.153333	-0.0933333	-0.0633333	-0.08	-0.12	-0.123333	-0.01	0.00333333	0.116667	-0.0133333	-0.0633333	-0.0166667	0.0466667	0.00333333	-0.22	0.203333	-0.36	-0.0166667	0.0333333	0.183333	-0.233333	-0.04	-0.0266667	-0.253333	-0.13	-0.12	0.113333	0.136667	-0.07	-0.126667	-0.103333	0.0166667	-0.143333	-0.206667	0.0466667	-0.0833333	-0.103333	-0.03	0.0866667	-0.12	-0.156667	-0.34	-0.286667	-0.246667	-0.13
BAIAP3	0.02	0.13	-0.11	0.01	0.44	-0.05	0.23	0.11	0.65	0.08	0.37	0.11	-0.71	0.27	-0.1	0.59	0.52	0.17	-0.19	-0.39	-0.34	0.07	-0.35	0.06	-0.44	-0.23	0.2	-0.24	0.24	-0.09	-0.49	-0.54	-0.32	-0.11	0.28	-0.11	-0.09	-0.4	0.24	0.04	-0.12	0.01	0.31	0.01	-0.42	-0.46	-0.02	-0.28	-0.09
BAK1	0.21	-0.24	-0.06	0.56	0.21	0.15	-0.49	-0.25	0.25	-0.19	-0.21	-0.38	-0.74	0.23	0.49	0.1	0.37	-0.38	-0.42	-0.38	0.06	-0.06	-0.02	-0.33	-0.01	0.23	-0.33	-0.6	-0.43	-0.7	-0.08	0.97	-0.23	-0.42	0.01	-0.45	-0.16	-0.11	0	-0.08	0.17	-0.58	-0.03	-0.21	0.59	-0.14	-0.21	NA	0.54
BAMBI	-0.4	0.18	0.21	-0.13	-0.14	0.12	0.11	-0.26	0.14	-0.32	0.12	0.08	NA	0.19	0.03	0.69	0.13	0.1	-0.23	1.17	0.42	0.25	0.16	0.51	0.28	0.23	-0.11	-0.03	0.01	0.05	0.61	0.97	0.31	0.08	-0.01	-0.07	-0.07	-0.04	-0.01	0.26	0.02	0.09	-0.69	NA	0.05	1.33	-0.12	NA	0.86
BANF1	0.28	0.41	-0.29	-0.24	0.42	-0.26	0.57	0.16	0.56	0.35	0.45	0.09	-0.45	0.85	0.09	0.07	0.48	-0.03	-0.28	0.18	-0.18	0	-0.05	-0.43	-0.1	-0.18	0.33	0.34	0.4	0.11	NA	-0.07	0.03	0.43	0.26	0.62	-0.09	0.63	0.57	0.67	-0.06	-0.03	0.43	0.06	0	NA	0.22	-0.05	-0.27
BANK1	0.26	0.28	-0.33	0.11	0.46	-0.35	0.07	-0.14	0.51	-0.06	0.06	-0.25	-0.44	0.05	-0.07	0.02	0.41	0.06	-0.01	0.3	0.16	-0.1	0.01	0.19	-0.17	0.08	0.1	0.16	-0.05	0.01	-0.46	-0.33	-0.41	0.14	0.39	-0.03	0.01	0.14	0.27	0.15	-0.1	0.01	0.37	0.08	-0.34	-0.78	-0.36	-0.38	-0.21
BANP	0.2075	-0.045	-0.0575	0.0125	-0.1625	0.12	-0.1075	-0.0075	-0.0525	0.0575	-0.075	0.07	0.19	0.0225	0.105	0.15	-0.02	-0.01	0.095	-0.115	-0.025	0.2	0.13	0.11	0.2	0.105	-0.03	0.015	-0.0175	-0.135	0.065	-0.045	0.095	-0.0425	0.0475	-0.1075	-0.12	0.095	-0.0175	-0.2025	0.1	0.045	-0.2075	-0.1975	0.0725	0.05	-0.0566667	0.255	-0.0925
BAP1	0.76	0.07	0.145	0.11	-0.385	0.025	-0.015	-0.07	-0.08	-0.075	-0.08	-0.05	0.155	-0.05	0.175	0.07	0.005	-0.025	0.08	0.09	0.075	0	-0.125	0.01	0.03	0.08	-0.03	0.11	0.175	-0.03	0.035	-0.095	-0.085	0.205	0.075	0.29	-0.01	0.01	-0.14	0.02	0.055	0.005	-0.05	-0.02	0.025	0.085	-0.085	-0.04	-0.05
BAPX1	-0.09	-0.42	0.03	-0.11	0.25	0.38	-0.07	0.13	-0.24	NA	-0.17	-0.03	-0.31	-0.12	0.08	-0.64	0.18	-0.14	-0.08	0.13	-0.28	0.12	-0.16	0.26	-0.21	-0.17	-0.16	-0.17	-0.31	-0.13	0.25	0.73	0.99	-0.06	-0.01	-0.36	-0.34	-0.17	0.19	-0.32	0.33	-0.04	0.09	0.1	0	-0.24	0.33	-0.48	-0.1
BARD1	-0.14	0.04	-0.61	-0.31	0.45	0.14	0.18	-0.02	0.04	0.09	0.19	0.23	0.11	0.22	-0.07	0.03	0.34	0.14	-0.15	0.38	-0.28	0.11	0.01	-0.05	-0.11	-0.02	0.24	0.11	-0.04	0.09	0.73	0.42	0.37	0.03	-0.05	0.02	-0.1	0.14	0.17	0.05	-0.43	0.11	-0.18	0.16	-0.06	0.43	0.02	-0.06	0.07
BARHL1	0.15	-0.22	0.29	-0.43	0.35	-0.24	-0.35	-0.29	-0.03	-0.35	-0.07	-0.21	0.39	-0.26	-0.21	-0.12	-0.1	-0.22	-0.58	0.19	-0.57	0.23	0.36	0.01	-0.52	-0.08	-0.53	-0.84	-0.51	-0.27	0.59	0.26	-0.03	-0.36	-0.38	-0.69	-0.21	-0.33	-0.46	-1.03	-0.08	-0.42	0.19	-0.25	-0.18	-0.63	-0.56	-0.4	-0.12
BARHL2	-0.19	0.1	0.01	-0.24	-0.22	-0.2	-0.03	-0.14	0.08	-0.02	-0.14	0.15	0.11	0.05	0.68	0.26	0.08	0.06	-0.05	0.18	-0.11	-0.04	0.15	0.1	-0.04	0.03	-0.07	-0.1	0.06	0.08	0.01	-0.5	-0.24	-0.02	-0.02	0.17	-0.04	-0.35	0.07	-0.04	-0.11	0.13	-0.31	-0.3	-0.49	0.01	-0.24	-0.06	-0.08
BARX1	0.42	0.29	0.29	0.26	0.36	0.08	0.08	0.78	0.01	0.01	0.27	-0.02	-0.86	0.4	NA	0.61	0.21	0	-0.26	-0.21	NA	0.46	-0.41	NA	-0.15	-0.68	0.2	0.13	-0.06	0.09	-0.31	NA	0.27	0.2	0.19	-0.31	-0.44	0.72	0.01	0.31	-0.77	0.06	NA	0.17	2.27	0.72	NA	NA	0.57
BARX2	-0.06	0.07	0.24	0.1	0.21	0.45	0.11	-0.14	0.47	0.3	0.14	0.16	-0.1	0.25	-0.1	0.17	0.11	0.05	0.14	-0.31	-0.36	0.72	-0.06	-0.26	-0.15	-0.21	0.15	0.01	0.24	0.21	-0.01	-0.47	-0.05	0.01	0.1	-0.01	-0.18	-0.24	0.15	0.19	0.23	0.04	-0.3	0.15	0.14	0.16	-0.43	-0.26	0
BASP1	0.79	0.11	-0.47	0.13	-0.05	-0.21	-0.31	0.12	-0.77	-0.9	-0.11	0.27	0.33	-0.33	0.57	-0.37	0.03	-0.42	0.9	0.11	0.27	-0.94	-0.64	-0.11	0.68	0.08	0.2	0.84	0.45	0.43	0.19	0.36	0.35	0.63	0.04	-0.09	0.37	0.29	-0.53	0.06	-0.15	-0.06	-0.46	-0.55	0.22	-0.24	0.4	NA	1.13
BAT1	0.56	0.26	-0.27	-0.35	-0.38	-0.35	0.12	-0.07	-0.17	0.26	0.09	-0.09	0.46	0.11	0.21	-0.4	-0.27	-0.15	0.36	0.34	0.99	0.17	0.16	0.29	0.46	0.65	-0.15	-0.13	-0.15	0.05	0.4	0.7	0.72	0.44	0.08	0.05	-0.62	0.96	0.11	0	0.57	0.18	0.19	-0.03	0.92	0.31	-0.06	0.38	0.48
BAT2	0.45	-0.15	0.16	-0.03	-0.31	-0.08	0.07	-0.09	-0.19	0.06	0.03	-0.34	-0.38	-0.15	-0.01	-0.13	-0.07	-0.05	-0.29	-0.4	-0.05	-0.36	-0.31	-0.43	-0.23	-0.29	-0.19	0.33	-0.3	-0.11	-0.16	-0.35	-0.38	-0.15	0.01	-0.02	-0.17	-0.13	0	0.22	-0.09	-0.03	-0.03	-0.02	0.02	-0.17	-0.22	-0.39	-0.23
BAT2D1	0.163333	-0.24	-0.15	-0.296667	-0.13	-0.576667	-0.316667	-0.00666667	-0.246667	-0.393333	-0.34	-0.1	-0.0533333	-0.383333	-0.0933333	0.223333	-0.223333	-0.29	-0.173333	-0.243333	-0.543333	-0.0166667	0.103333	0.00333333	-0.503333	-0.216667	-0.383333	-0.616667	-0.376667	-0.3	0.0133333	-0.126667	-0.513333	-0.306667	-0.42	-0.35	-0.303333	-0.286667	-0.39	-0.506667	-0.0566667	-0.306667	-0.12	-0.286667	-0.706667	-0.36	-0.526667	-0.46	-0.366667
BAT3	-0.28	0.2	-0.1	-0.23	-0.25	0.12	0.01	-0.02	-0.18	0.3	0.27	-0.07	0.36	0.16	0.25	-0.34	-0.13	0.29	-0.19	0.21	-0.02	-0.27	-0.12	-0.08	-0.19	-0.22	0.56	0.26	0.19	0.33	0.34	0.38	0.11	0.35	0.28	0.42	0.21	-0.11	-0.22	0.02	0.11	0.44	0.02	-0.18	-0.17	0.53	1.09	NA	0.18
BAT4	-0.32	0.21	-0.4	0.01	0	0.09	0.08	-0.05	0.52	0.09	0.17	0.1	-0.1	0.14	0.02	0.49	0.39	0.18	0.09	-0.16	-0.08	0.26	0.05	0.51	-0.04	0.08	0.1	-0.37	0.19	0.07	0.08	-0.29	-0.16	0.02	0.04	-0.04	-0.03	-0.26	0.07	-0.12	-0.12	0.24	0.26	-0.18	-0.52	-0.23	-0.03	-0.13	0.01
BAT5	0.49	-0.15	-0.085	-0.28	0.21	-0.18	-0.07	-0.2	0.2	-0.075	-0.06	-0.06	-0.01	-0.09	-0.315	0.58	0.055	-0.035	-0.2	-0.305	-0.485	-0.045	0.035	-0.02	-0.23	-0.15	-0.315	-0.64	-0.145	-0.2	0.125	-0.36	-0.285	-0.22	-0.085	-0.195	-0.11	-0.38	-0.205	-0.395	-0.265	-0.14	0.05	-0.22	-0.695	-0.15	-0.25	-0.26	-0.21
BATF	-0.41	0.06	0.04	0.05	0.02	0.23	0	0.04	0.09	0.1	-0.13	-0.35	-0.35	0.04	0.35	0.48	0.14	0	-0.09	-0.31	0.23	0.39	-0.44	0.04	-0.27	-0.25	0.1	0.2	-0.1	0.03	0.15	0.22	0.33	-0.25	0.18	-0.15	0.06	0.32	-0.13	0.01	0.42	0.1	-0.08	-0.01	0.44	-0.33	0.66	-0.09	-0.11
BATF2	0.14	-0.77	-0.03	-0.28	-0.14	-0.78	-0.85	-0.94	-0.44	-0.73	-0.87	-0.79	-0.21	-0.83	-0.66	0.71	-0.55	-0.77	-0.77	-0.19	-0.89	-0.32	-0.13	-0.21	-1.08	-0.78	-0.66	-1.17	-0.7	-0.9	-0.46	-0.62	-0.48	-0.95	-1	-0.94	-0.8	-1.05	-0.94	-1.36	0.14	-1.02	-0.21	-0.85	-0.56	-1.01	-0.89	-0.09	-0.57
BAX	0.09	-0.42	-0.15	-0.05	0.23	-0.03	-0.28	-0.08	-0.18	-0.36	-0.18	-0.37	-0.3	-0.16	-0.1	-0.06	-0.06	-0.08	-0.52	-0.21	-0.48	0.02	-0.34	-0.02	-0.43	-0.4	-0.45	-0.46	-0.44	-0.4	-0.03	0.24	-0.02	-0.33	-0.48	-0.19	-0.56	-0.02	-0.32	-0.61	0.03	-0.36	0.11	-0.12	0.29	-0.48	-0.47	-0.46	-0.41
BAZ1A	NA	0.15	-0.31	0.49	0.52	-0.4	0.08	0.8	-0.54	-0.67	-0.04	0.15	-0.51	-0.38	0.05	-0.48	-0.37	-0.17	0.16	-0.13	0.54	-0.07	-0.8	0.1	-0.49	-0.25	-0.25	0.33	0.27	0.59	0.86	0.25	-0.22	0.29	0.2	-0.36	0.07	0.7	-0.33	0.02	0.39	-0.1	0.59	0.23	-0.32	-0.34	NA	NA	0.26
BAZ1B	0.04	-0.15	-0.11	0	-0.53	-0.1	0.19	0.43	-0.12	0.07	0.11	0.08	0.16	-0.13	-0.23	0.28	0.07	0.13	-0.43	-0.68	-0.16	0.18	-0.33	0.25	0.03	-0.22	0.08	0.21	-0.11	-0.06	0.19	0.07	0.08	0.06	-0.1	0.11	-0.3	0.05	-0.01	-0.07	1.03	0.01	0.27	-0.01	0.73	-0.26	0.96	0.68	0.71
BAZ2A	-0.15	-0.3	-0.185	-0.205	-0.195	-0.05	-0.22	-0.335	0.075	-0.285	-0.18	-0.135	0.005	-0.04	-0.22	0.085	-0.13	-0.145	-0.385	0.025	-0.51	0.01	-0.185	-0.105	-0.435	-0.32	-0.32	-0.625	-0.32	-0.335	0	-0.11	-0.04	-0.415	-0.075	-0.435	-0.405	-0.21	-0.19	-0.5	-0.355	-0.13	-0.03	-0.325	-0.08	-0.485	-0.475	0	-0.35
BAZ2B	0.36	-0.246667	-0.07	0.313333	0.0133333	-0.0466667	0.0766667	0.1	-0.543333	-0.0333333	0.04	-0.0733333	-0.0766667	-0.37	-0.0766667	-0.08	-0.343333	-0.116667	0.1	0.21	0.153333	-0.426667	-0.196667	-0.176667	0.28	-0.0433333	-0.05	0.376667	0.09	0.106667	0.03	0.26	0.15	0.196667	-0.2	0.126667	0.133333	-0.0166667	-0.22	-0.0333333	0.386667	0.09	-0.373333	0.183333	0.153333	0.33	0.05	-0.11	0.0666667
BBC3	-0.21	0.06	-0.16	-0.12	-0.335	0.16	-0.19	-0.05	-0.065	-0.03	-0.14	-0.175	-0.04	0.155	0.22	-0.21	0.28	-0.04	-0.19	-0.065	-0.025	-0.03	0.035	-0.025	-0.07	0.03	-0.195	-0.19	-0.005	-0.12	-0.01	0.025	0.005	-0.285	0.25	-0.42	0.035	-0.005	0.23	0.015	-0.125	-0.115	-0.445	-0.13	0.075	-0.29	0.02	-0.23	-0.26
BBOX1	-0.1	-0.08	-0.47	0	-0.495	-0.595	0.07	-0.1	0.26	-0.04	0.15	0.02	0.255	0.19	0.2	-0.1	0.095	0.05	0.115	-0.33	0.055	-0.13	-0.835	0.06	0.145	0	0.11	-0.15	0.125	0.24	0.04	-0.06	-0.63	-0.01	0.055	0.25	-0.115	0.335	0.095	0.16	-0.32	0.025	-0.33	0.4	0.01	0.455	0.73	NA	0.45
BBS1	-0.79	-0.25	-0.615	0.07	0.43	0.345	0.15	0.185	0.025	-0.12	0.19	0.08	0.24	0.035	0.07	0.18	-0.07	0.06	-0.01	0.265	0.03	0.525	0.1	0.295	-0.325	0.15	-0.33	0.1	0.14	-0.32	0.545	0.355	-0.015	0.11	0.11	-0.34	0.23	0.74	-0.13	0.28	0.2	0.1	-0.105	0.04	-0.46	0.23	0.25	NA	1.3
BBS10	0.43	-0.42	0.105	-0.12	0.17	0.045	-0.325	0.065	-0.205	-0.535	-0.385	-0.265	-0.04	-0.295	-0.015	0.005	-0.115	-0.235	-0.265	0.145	-0.4	0.09	0.05	0.315	-0.275	-0.155	-0.305	-0.63	-0.43	-0.405	-0.155	-0.17	0.055	-0.435	-0.525	-0.48	-0.96	0.085	-0.305	-0.485	0.29	-0.43	0.275	-0.59	0.285	-0.06	-0.155	0.2	-0.025
BBS2	-0.09	-0.06	-0.06	-0.03	-0.73	-0.04	-0.58	0.11	0.1	-0.22	-0.2	-0.17	0.18	-0.04	0.17	0.17	-0.17	-0.18	-0.11	0.06	-0.02	-0.21	-0.08	-0.18	-0.03	0.04	-0.46	-0.24	-0.09	-0.26	-0.3	0.06	-0.25	0	-0.03	0.24	0.07	-0.46	0.17	-0.15	-0.96	-0.28	0.14	-0.08	0.51	-0.09	-0.25	0.18	0.17
BBS4	0.17	0.1	-0.03	0.06	-0.4	0.4	0.07	0	0.14	-0.03	0.1	0.25	0.22	0.1	-0.03	0.12	0.06	0.26	0.15	0.4	0.04	0.42	0.25	0.27	0.14	0.31	0.05	0.3	0.15	0.09	0.32	0.77	-0.38	0.18	-0.17	0.09	0.21	0.27	-0.05	-0.28	-0.36	0.09	0.08	0.34	-0.08	0.14	-0.15	0.09	0.38
BBS7	NA	-0.4	NA	0.14	-0.14	-0.23	NA	0.15	NA	-0.26	NA	-0.26	NA	0.35	NA	-0.47	0.72	-0.12	NA	NA	NA	0.76	NA	NA	-0.43	NA	NA	NA	0.14	0.42	1.23	0.39	NA	0.07	-0.03	0.75	NA	0.7	0.33	0.57	0.73	0.33	-0.47	NA	NA	NA	NA	NA	1.25
BBS9	0.77	-0.095	0.14	-0.1	-0.215	0.005	-0.105	0.145	0.045	0.03	-0.005	0.17	-0.185	-0.185	-0.06	0.3	0.206667	-0.02	0.0133333	-0.185	-0.415	0.035	0.105	0.645	0.02	-0.065	-0.315	-0.17	-0.02	0.173333	-0.005	0.095	-0.41	-0.0466667	-0.16	0.065	-0.125	-0.39	-0.06	-0.346667	-0.535	-0.11	-0.105	0.236667	-0.62	-0.76	-0.71	-0.02	0.08
BBX	-0.17	-0.03	-0.26	0.21	-0.34	0.1	0.18	0.13	0.35	0.32	0.32	0.12	0.09	0.05	0.3	0.11	0.18	0.17	0.17	0.08	-0.15	0.33	-0.32	0.38	-0.04	-0.22	0.11	0.18	0.08	0.13	-0.06	-0.2	-0.13	-0.02	0.31	0.18	-0.08	-0.18	0.19	0.19	-0.01	0.21	0.19	0.1	-0.09	-0.23	0.21	-0.19	0.03
BCAM	-0.46	-0.085	0.115	0.07	-0.2	-0.065	-0.035	-0.055	0.275	-0.28	0.04	0.08	0.215	0.125	0.07	-0.305	0.12	-0.055	-0.04	0.075	0.135	0.185	-0.015	0.145	0.025	0.09	-0.095	-0.275	-0.085	-0.065	0.155	0.195	0.21	-0.075	0.155	-0.29	-0.04	-0.015	0.085	-0.215	-0.205	-0.045	-0.09	-0.14	-0.265	0.055	-0.305	0.22	-0.19
BCAN	-0.06	-0.08	0.16	-0.14	-0.07	0.19	0.24	-0.09	-0.2	0.05	-0.1	-0.35	-0.37	-0.02	-0.26	-0.04	0.04	-0.12	-0.2	0.14	-0.26	-0.1	-0.4	0.44	-0.12	-0.11	0.09	0.19	-0.02	-0.2	-0.11	-0.23	-0.32	0.02	0.03	0.26	-0.24	-0.06	0.12	-0.03	0.41	-0.12	-0.28	-0.19	-0.06	0.16	0.3	-0.47	0.47
BCAP29	NA	0.31	NA	0.25	0.23	0.23	0.15	0.53	-0.23	0.18	-0.27	0.52	0.56	-0.54	0.59	-0.48	-0.02	0.26	0.24	0.43	0.82	0.47	0.16	0.48	0.68	0.39	-0.07	0.44	0.36	-0.34	0.86	0.82	0.17	0.65	0.15	0.22	0.43	0.31	0.08	0.02	-0.35	NA	-0.73	NA	0.07	0.12	NA	NA	0.56
BCAP31	-0.25	-0.12	-0.05	-0.08	-0.68	0.12	0.01	-0.09	0.27	-0.09	-0.16	0.08	-0.33	-0.22	-0.24	0.4	0.13	0.07	-0.57	-0.03	-0.7	0.08	-0.31	0.18	-0.77	-0.51	0.08	-0.09	0.03	0.07	-0.08	-0.46	0.08	0.06	-0.1	-0.25	-0.21	-0.24	-0.18	-0.54	-0.24	-0.02	-0.01	-0.13	-0.39	-0.62	-0.58	-0.87	-0.32
BCAR1	-0.36	-0.03	0.04	0.13	0.02	-0.01	0.03	0.02	0.2	-0.01	0.07	0.04	0.2	0.1	0.4	-0.02	0.16	0.01	-0.21	-0.33	0.11	0.08	-0.33	0.1	-0.13	-0.09	-0.04	-0.13	-0.15	-0.11	-0.13	-0.34	-0.47	-0.18	-0.09	-0.18	-0.08	-0.17	-0.26	0.03	0.14	-0.02	-0.08	-0.01	-0.04	-0.31	0.07	NA	-0.16
BCAR3	0.95	-0.04	0.05	-0.24	-0.86	0	-0.27	-0.04	0.07	-0.06	-0.1	-0.2	0.13	-0.34	-0.3	0.14	0.12	0.25	0	0.14	-0.38	-0.19	0.08	0.28	-0.14	0.03	-0.29	-0.56	-0.43	-0.03	-0.59	0.04	0.08	-0.18	-0.16	-0.28	0.07	-0.08	-0.27	-0.44	-0.17	-0.04	-0.04	-0.19	-0.35	-0.19	-0.64	-0.9	0.01
BCAS1	-0.24	0.19	0.05	0.05	-0.13	0.19	0.28	0.02	0.17	0.09	0.16	0.27	0.29	0.06	-0.01	0.5	0.05	0.15	-0.02	-0.09	-0.47	0.14	-0.08	-0.06	-0.21	-0.11	0.31	0.11	0.19	0.23	-0.13	0.13	-0.32	0.15	0.12	0.26	-0.07	-0.67	0.02	-0.23	-0.06	0.08	0.25	0.5	-0.35	-0.43	0.11	-0.04	0.07
BCAS2	NA	0.11	-0.22	-0.13	-0.35	-0.15	0.2	-0.01	0.13	-0.04	0.12	0.09	0.19	-0.15	-0.11	0.32	-0.03	0.13	0.1	-0.11	-0.09	-0.02	-0.24	-0.55	-0.17	-0.09	0.15	0.27	0.15	0.19	0.04	-0.34	0	0.13	0.14	0.09	-0.02	0.04	0.03	-0.38	-0.31	0.02	-0.01	0.16	-0.58	-1.12	0.18	-0.31	-0.6
BCAS3	0.02	-0.202	-0.15	-0.416	0.068	-0.3	-0.046	-0.076	-0.168	-0.09	-0.096	-0.066	-0.046	-0.026	-0.252	0.16	-0.048	-0.198	-0.224	0.094	-0.2225	-0.028	0.014	-0.2	-0.102	-0.338	-0.208	-0.172	-0.064	-0.256	-0.062	-0.42	-0.228	-0.214	-0.112	-0.056	-0.186	-0.235	-0.108	-0.06	0.28	-0.154	-0.192	-0.168	-0.315	-0.0775	-0.1475	-0.0175	0.078
BCAS4	0.025	0.04	-0.03	-0.185	-0.505	0.275	-0.085	0.07	-0.045	-0.03	-0.085	-0.09	0.06	-0.08	-0.015	0.33	0.05	0.1	-0.26	-0.02	-0.475	-0.06	-0.11	-0.205	-0.46	-0.17	-0.145	-0.46	-0.35	-0.055	-0.1	-0.455	-0.49	-0.07	-0.085	-0.105	0.015	-0.365	-0.12	-0.265	-0.135	-0.03	-0.18	-0.065	-0.455	-0.535	-0.8	-0.47	-0.215
BCAT2	0.65	-0.01	0.24	0.13	0.07	0.55	0.09	0	-0.02	0.04	-0.04	-0.1	-0.18	0.02	0.53	0.51	0.19	0.1	-0.05	-0.32	-0.2	0.17	-0.08	0	-0.03	-0.51	-0.01	0.24	-0.14	-0.15	-0.07	-0.16	-0.27	0.06	-0.01	-0.2	0.02	0.37	0.12	0.31	-0.23	0.02	0.07	-0.05	-0.43	-0.32	-0.78	-0.89	-0.3
BCCIP	-0.54	0.2	0.07	-0.595	-0.155	-0.03	0.1	0.72	-0.96	0.25	0.13	-0.285	-0.505	-0.53	0.91	-0.79	-0.645	-0.125	0.24	-0.785	0.51	-0.575	-0.085	-0.85	0.145	-0.42	-0.3	0.37	0.01	-0.075	0.265	-0.25	-0.02	0.01	-0.435	0.44	-0.005	0.575	-0.395	-0.27	-0.43	-0.01	-0.08	0.495	0.37	0.34	0.36	NA	-0.06
BCDIN3	-0.15	-0.04	-0.1	-0.02	-0.22	0	-0.12	-0.13	0.01	-0.12	-0.06	-0.16	0.3	-0.06	0.01	-0.04	-0.1	-0.07	0.01	-0.14	0.17	0.01	0.02	-0.03	0.22	0.07	-0.29	-0.34	0.16	0.01	0.4	-0.24	0.07	-0.08	-0.04	-0.17	-0.23	0.16	-0.16	-0.28	0.04	0.04	0.07	NA	0.27	0.36	0.09	0.22	0.08
BCDO2	NA	0.14	0.14	0.36	0.11	-0.09	-0.04	0.05	-0.06	-0.28	0.26	0.18	0.5	-0.36	0.16	NA	0.01	0.23	0.39	0.27	-0.06	0.05	0.52	0.15	-0.03	0.03	NA	0.28	0.35	0.13	-0.33	0.28	0.34	0.32	-0.18	0.08	0.01	-0.22	-0.16	NA	0.14	-0.02	-0.16	0.36	NA	-0.2	-0.3	-0.18	NA
BCHE	NA	-0.09	NA	1.18	NA	0.91	-0.11	0.14	0.24	NA	NA	-0.12	0.05	0.43	0.78	NA	-0.09	0.09	-0.36	0.49	-0.3	NA	-0.44	0.1	0.24	0.35	-0.78	NA	-0.42	-0.18	-0.7	1	NA	-0.32	0.22	0.08	0.53	NA	0.17	0.53	NA	-0.34	NA	-0.3	NA	NA	1.36	NA	NA
BCKDHA	0.18	0.19	-0.14	0.42	-0.3	0.01	0.14	0.34	0.22	0.14	-0.09	-0.04	-0.54	0.08	0.21	0.58	0.04	0.05	0.01	0.35	0.14	0.27	-0.72	0.21	-0.15	NA	0.34	0.24	0.08	0.37	0.45	0.82	0.69	0.24	0.22	0.24	-0.27	-0.07	0.13	-0.13	0.11	0.09	0.79	0.18	0.38	0.05	0	1.18	0.8
BCKDHB	0.04	0.17	NA	-0.3	-0.42	0.25	0.37	-0.08	-0.14	0.24	0.01	-0.14	-1.1	0.02	0.7	-0.12	-0.4	-0.08	0.1	0.63	-0.25	-0.61	-0.22	NA	-0.06	NA	0.25	0.39	-0.02	0.2	-0.18	-0.27	-0.24	0.18	-0.06	0.28	-0.22	-0.07	0.13	0.56	1.38	0.02	NA	0.01	0.69	0.31	-0.07	-0.4	0.27
BCKDK	-0.2	-0.01	-0.38	0.23	0.64	0.14	0.05	-0.01	0.23	0.01	0.13	-0.19	-0.44	0.11	0.24	-0.6	0.22	0.04	-0.08	0.17	-0.15	0.25	-0.13	0.33	-0.12	-0.16	0.15	0.17	0.04	-0.11	0.2	0.21	0.28	-0.07	0.26	-0.02	-0.02	0.46	-0.01	-0.15	0.6	0.04	0.03	0.02	0.23	-0.45	0.04	-0.23	0.09
BCL10	-0.57	-0.16	-0.1	-0.01	0.42	-0.09	0.01	-0.06	-0.8	-0.28	-0.17	-0.34	-0.29	-0.11	-0.02	-0.48	-0.6	-0.4	-0.01	0.27	0.02	-0.57	-0.25	-0.69	0.17	-0.24	-0.04	0.4	-0.11	-0.21	0.04	-0.36	0.25	-0.01	-0.39	0.19	-0.12	0.13	-0.19	0.32	0.17	-0.09	-0.08	-0.14	0.53	0.38	0.36	-0.52	0.2
BCL11A	0.13	0.01	-0.065	0.09	0.43	0.025	0.21	0.145	-0.265	0.04	0.11	-0.025	-0.12	0.095	-0.01	-0.345	-0.285	-0.055	-0.115	0.155	0.045	-0.115	-0.165	0.02	0.27	-0.2	0.185	0.495	0.03	-0.135	0.34	0.3	0.13	0.105	-0.12	0.2	-0.135	0.415	0.095	0.33	0.36	0.05	-0.285	0.035	0.3	-0.09	0.215	-0.09	-0.19
BCL11B	NA	-0.03	NA	NA	NA	NA	0.59	NA	-0.08	0.11	0.35	-0.25	NA	0.06	NA	-0.66	-0.22	0.1	-0.45	NA	NA	-0.4	-1.08	NA	-0.88	-0.06	0.07	0.31	0.3	-0.25	0.26	NA	0.18	0.35	-0.11	0.01	-0.12	-0.48	-0.01	0.57	NA	0.12	NA	0.17	NA	1.6	1.95	NA	NA
BCL2	0.76	-0.235	-0.14	0.135	0.45	0.165	-0.015	0.22	0.055	-0.06	-0.05	-0.19	-0.205	-0.04	0.135	-0.275	0.13	-0.1	-0.335	0.085	-0.4	0.38	-0.265	-0.065	-0.455	-0.36	0.04	-0.12	-0.205	-0.125	0.365	0.315	0.225	-0.15	-0.045	-0.145	-0.315	0.045	0.03	-0.305	-0.015	-0.17	0.13	0.06	0.27	-0.28	-0.04	0.33	-0.105
BCL2A1	0.465	-0.225	0.425	-0.06	-0.375	-0.295	-0.045	-0.05	-0.57	-0.54	0.31	0.025	0.005	-0.605	-0.285	-0.175	-0.31	-0.225	0.04	-0.255	0.505	-0.03	-0.505	-0.37	0	-0.29	0.055	0.54	-0.075	0.255	0.11	0.075	0.15	0.41	-0.325	-0.085	0.01	-0.155	-0.305	0.115	0.135	0.155	-0.185	0.25	0.275	0.375	0.295	-0.08	-0.33
BCL2L1	0.16	0.08	-0.11	0.19	-0.04	0.26	0.07	0.38	0.26	-0.01	0	0.51	0.4	0.3	0.41	-0.77	0.13	0.39	0.04	0.45	0.28	0.26	0.21	0.07	0.2	0.4	0.03	0.11	-0.08	0.16	0.26	0.56	0.5	0.07	0.28	0.03	0.15	0.26	-0.02	-0.36	-0.11	0.29	-0.09	0.38	0.55	0.28	0.25	0.06	0.38
BCL2L10	0.08	-0.33	-0.15	-0.16	-0.12	-0.3	-0.11	-0.08	-0.07	-0.01	-0.03	-0.15	-0.45	0.01	-0.11	-0.17	-0.08	-0.39	-0.18	0.17	-0.35	-0.03	-0.25	0.17	-0.39	-0.4	-0.12	-0.12	0.02	-0.12	-0.44	-0.18	-0.24	-0.34	-0.18	-0.13	-0.17	-0.28	0.02	-0.05	0.13	-0.19	-0.07	-0.16	-0.39	0.08	0.17	-0.39	0.03
BCL2L11	-0.2	-0.19	0.11	-0.1	-0.31	-0.25	-0.07	-0.27	-0.3	0.11	-0.03	-0.34	-0.09	-0.06	-0.55	0.24	-0.23	-0.32	-0.28	0.13	0.14	-0.09	-0.32	-0.42	0.16	-0.13	-0.16	0.17	-0.11	-0.21	-0.19	-0.21	-0.25	-0.15	-0.07	-0.1	-0.31	-0.05	-0.07	-0.07	-0.14	-0.22	0.13	0.07	0	-0.43	0.13	-0.12	-0.35
BCL2L12	0.115	-0.31	-0.06	-0.205	-0.23	-0.185	-0.245	-0.13	0.09	-0.215	-0.185	-0.355	0	-0.03	-0.22	0.22	0.075	-0.205	-0.31	-0.045	-0.615	-0.075	-0.13	0.025	-0.17	-0.345	-0.33	-0.425	-0.305	-0.235	-0.34	-0.335	-0.4	-0.32	-0.015	-0.365	-0.145	-0.325	-0.055	-0.07	-0.315	-0.25	0.095	-0.33	-0.38	-0.46	-0.27	-0.16	-0.195
BCL2L13	0.23	-0.135	-0.485	0.13	0.48	0.16	-0.005	0.175	-0.175	-0.045	-0.02	-0.135	-0.47	-0.06	0.135	-0.51	-0.205	-0.135	-0.085	0.13	0.04	-0.02	-0.175	0.045	-0.095	-0.04	0.02	0.045	-0.095	-0.195	-0.04	0.075	0.3	-0.19	-0.35	-0.1	-0.21	0.455	-0.215	-0.28	0.09	-0.13	0.105	0.075	0.09	-0.11	0.195	-0.22	-0.11
BCL2L14	-0.04	-0.12	0.055	0.05	-0.17	-0.27	-0.37	0.205	-0.045	-0.25	-0.27	0.2	0.305	-0.095	0.19	-0.57	-0.07	-0.015	0.125	0.165	-0.09	0.22	0.675	0.49	-0.31	0.2	-0.125	-0.325	0.205	0.01	0.045	0.59	0.595	-0.225	-0.09	-0.105	-0.385	0.11	-0.225	-0.36	0.18	-0.105	0	0.185	-0.14	0.515	0.39	0.23	0.51
BCL2L2	0.08	-0.01	-0.03	-0.5	-0.35	-0.55	0.18	0.1	0.31	0.12	0.24	0.02	-0.6	0.04	-0.47	-0.3	0.27	0.07	-0.57	1.03	-0.11	-0.16	-0.48	-0.22	-0.61	-0.71	0.13	0.25	0.04	-0.1	-0.24	0.49	-0.14	-0.09	-0.05	0.05	0.08	0.14	0.17	0.27	-0.09	0.1	-0.16	-0.23	-0.8	NA	-1.08	-0.4	-0.4
BCL3	-0.14	-1.08	-0.36	-0.78	-0.26	-0.37	-1.32	-0.55	-0.55	-0.82	-0.6	-1.11	-0.81	-1.21	-0.64	0.78	-0.85	-0.79	-1.12	-0.11	-1.77	-0.47	-0.69	-0.33	-1.63	-1.29	-0.89	-2.02	-1.38	-1.39	0.98	-0.46	-0.49	-1.62	-1.44	-0.5	-1.19	-0.46	-0.81	-1.05	-0.21	-1.51	-0.08	-1.14	-1.09	-1.1	-0.95	-0.17	-0.37
BCL6	0.75	-0.26	0.07	-0.04	0.21	-0.06	0.02	0.38	0.16	-0.17	-0.34	-0.16	0.3	0.07	0.2	-0.31	-0.02	-0.12	0	0.49	-0.05	0.32	0.66	0.69	0.02	0.26	0.03	0.03	0.06	0.06	-0.22	0.38	0.19	0.05	0.14	-0.08	-0.07	-0.11	-0.12	-0.34	0.03	-0.42	0.03	-0.04	-0.66	-0.11	-0.03	0.59	0.03
BCL7A	-0.4	-0.23	-0.23	-0.07	0.02	-0.35	-0.04	0.02	-0.12	0.09	-0.27	-0.49	-0.24	0.01	-0.08	0.31	0.01	-0.26	-0.06	-0.39	0.11	-0.34	-0.19	-0.36	0.22	-0.09	-0.3	0.03	-0.22	-0.28	-0.49	-0.56	-0.44	-0.12	0.17	-0.27	-0.28	-0.11	-0.13	-0.14	-0.25	-0.52	-0.16	-0.11	-0.13	-0.71	-0.24	-0.25	-0.62
BCL7B	0.5	0.11	-0.43	0.08	-0.17	0.19	0.19	-0.18	0.52	-0.18	0.23	0.13	0.22	0.05	0.11	0.38	0.17	0.2	-0.15	-0.29	-0.17	0.32	0.21	0.38	-0.17	-0.12	0.06	-0.28	0.12	-0.24	0.17	-0.33	0.1	0	-0.01	-0.03	-0.27	0.33	-0.02	-0.13	-0.05	-0.01	0	-0.34	0.05	-0.08	-0.18	0.01	-0.05
BCL7C	0.67	0.01	0.29	0.06	0.26	-0.35	NA	0.18	0.19	0.02	0.32	0.27	-0.44	0.01	0.5	-0.08	0.07	-0.07	0.01	-0.1	-0.36	0.32	0.08	-0.33	-0.31	0.05	-0.02	-0.24	0.23	0.12	-0.17	0.16	-0.13	-0.14	-0.06	-0.17	0.1	-0.05	-0.05	-0.36	0.04	-0.21	0.16	0.37	NA	-0.22	-0.11	-0.46	-0.17
BCL9	-0.76	-0.35	-0.33	0.12	-0.46	0.1	-0.54	0.16	0.04	-0.55	-0.22	-0.24	-0.09	-0.22	-0.11	0.68	-0.14	-0.19	-0.42	-0.29	-0.58	0.27	-0.24	0.06	-0.43	-0.21	-0.56	-0.8	-0.47	-0.4	-0.09	0.33	-0.15	-0.32	-0.02	-0.78	-0.28	0.05	-0.49	-0.38	0.04	-0.5	-0.28	-0.44	-0.66	-0.27	-0.89	NA	-0.09
BCLAF1	0.02	-0.01	0.01	0.27	0.2	-0.32	0.52	0.57	-0.45	0.2	0.39	0.04	-0.89	-0.16	-0.76	0.16	-0.19	-0.07	-0.02	NA	0.11	-0.05	-0.24	NA	0.67	0.27	0.47	0.65	0.09	0.21	0.19	-0.35	0.24	0.06	-0.24	0.22	0.04	0.53	-0.01	0.08	0.17	0.35	NA	-0.15	NA	-0.16	-0.49	NA	-0.04
BCMO1	0.45	0.05	-0.43	0.09	-0.02	-0.17	0.24	0.06	0.2	-0.08	0.22	0.02	0.11	0.11	-0.16	-0.36	0.27	0.04	-0.13	0.6	-0.38	0.45	0.21	0.38	-0.14	-0.05	0.44	-0.16	0	0.13	0.22	0.5	-0.36	0.11	-0.14	-0.01	-0.26	-0.24	0.09	0.05	-0.01	0.08	0.22	-0.04	-0.25	0.06	-0.07	-0.14	-0.12
BCOR	0.46	0.06	0.13	0.09	-0.21	0.07	-0.23	0.08	-0.36	-0.06	0.03	0.2	0.28	-0.03	0.34	-0.54	-0.39	-0.08	0.38	0.71	0.47	0.23	0.14	0.36	0.49	0.61	0	0.03	0.27	0.01	0.52	0.6	0.45	0.18	-0.22	0.04	0.46	0.7	-0.27	0.07	0.21	0.15	0.01	0.42	0.48	0.1	0.28	-0.06	0.37
BCORL1	0.415	-0.075	0.31	0.07	0.03	0.05	0.055	0.185	0.3	-0.105	-0.035	-0.075	-0.15	0.07	-0.02	0.37	0.225	0.105	-0.07	-0.135	-0.35	0.38	0.04	0.12	-0.415	-0.135	0.125	-0.19	-0.22	-0.08	-0.085	-0.28	-0.205	-0.09	0.135	-0.025	-0.09	-0.125	-0.015	-0.115	0.16	-0.11	0.26	-0.09	-0.19	-0.24	-0.22	-0.35	-0.195
BCORL2	-0.405	-0.075	0.15	-0.195	0.035	-0.21	0.065	-0.255	-0.045	0.08	0.01	-0.015	0.07	0.09	-0.085	-0.265	-0.045	-0.015	0.115	-0.055	0.155	-0.065	0.13	0.055	0.07	0.17	0.13	0.07	0.015	0.015	-0.05	0.14	0.15	-0.075	-0.045	0.085	-0.06	-0.135	0.095	0.37	0.125	0.045	0.04	-0.025	-0.01	-0.005	-0.17	-0.02	0.345
BCR	-0.052	0.108	-0.236	0.154	0.316	0.096	0.144	-0.122	0.102	0.07	0.106	0.068	0.278	0.092	-0.0625	-0.112	0.116	0.076	0.072	0.136	0.2625	-0.062	0.204	0.14	0.405	0.22	-0.006	0.13	-0.018	0.022	0.214	0.024	-0.106	0.114	0.126	0.068	-0.16	0.114	0.092	0.136	0.366	-0.03	0.352	0.204	0.332	-0.134	0.434	0.0766667	0.3
BCS1L	0.26	0.25	0.01	-0.17	0.19	-0.18	-0.1	-0.35	-0.19	-0.02	0.05	-0.12	-0.34	-0.27	0.15	0.41	-0.23	0.06	0.12	-0.08	-0.08	-0.07	-0.23	-0.34	0.05	-0.03	NA	-0.36	-0.07	-0.21	-0.37	0	0.01	-0.51	0.01	-0.4	0.56	0.01	-0.22	-0.2	-0.25	-0.25	0.35	-0.19	-0.44	-0.16	0.02	-0.39	0.37
BDH1	-0.09	-0.01	0.16	-0.08	-0.03	-0.03	0.18	0.08	0.02	0.07	0.05	0.06	-0.2	0.11	-0.2	0.39	0.13	0.03	0.03	0.27	0.03	0.16	-0.05	0.18	-0.06	-0.05	0.23	0.07	0	-0.05	-0.08	-0.38	-0.3	-0.08	-0.09	0.1	-0.37	-0.12	0.16	0.01	-0.09	-0.01	0.09	-0.02	-0.07	-0.34	-0.26	-0.28	-0.16
BDH2	0.05	-0.15	0.21	0.2	-0.32	0.05	-0.03	0.34	-0.32	0.22	0.01	-0.11	-0.13	-0.05	0.11	0.03	0.03	-0.05	-0.03	0.54	-0.17	-0.1	-0.42	0.64	-0.26	-0.25	-0.02	0.24	-0.12	0.05	-0.14	0.24	-0.07	-0.1	-0.02	-0.13	0.07	0.09	-0.21	0.32	-0.04	-0.15	-0.09	0.08	0.1	0.16	0.17	0.08	0.19
BDKRB1	-0.85	-0.41	-0.42	-0.05	-0.33	-0.31	-0.36	-0.15	0.06	-0.39	-0.42	0.18	-0.33	-0.04	0.09	-0.23	-0.19	-0.5	-0.38	0.13	-0.15	0.32	0.2	0.03	-0.12	-0.22	0.01	0.17	-0.09	-0.06	0.29	-0.14	0.18	-0.23	-0.56	-0.01	-0.15	0.12	-0.06	0.21	-0.44	-0.27	-0.03	0.1	0.51	0.03	-0.04	-0.47	-0.05
BDKRB2	-0.27	-0.49	0.12	0.01	0.17	-0.07	-0.4	0.07	-0.38	-0.2	-0.45	-0.52	-0.52	-0.24	0.02	-0.64	-0.43	-0.52	-0.37	0.29	-0.23	-0.32	-0.2	-0.18	-0.6	-0.31	-0.19	0.08	-0.25	-0.36	0.36	0.59	-0.02	-0.47	-0.46	-0.32	-0.23	0.22	-0.28	-0.55	0.35	-0.73	-0.24	0.02	0.49	-0.34	0.04	0.68	-0.17
BDNF	-0.06	-0.09	NA	0.38	-0.09	0.25	0.18	-0.9	0.36	-0.01	0.08	0.11	0.21	0.15	0.38	0.2	0.16	0.23	-0.04	-1.57	0.1	0.3	-0.4	-0.1	-0.35	-0.13	-0.19	-0.24	0.07	0.09	0.05	-0.59	-0.03	0.02	0.1	0.04	-0.39	0.21	-0.04	0.3	NA	0.14	0.28	0.45	0.79	0.74	1.14	NA	-0.41
BDP1	-0.1	0.125	0.09	0.165	0.15	-0.16	0.06	0.315	-0.09	-0.105	0	0.045	0.345	0.04	-0.225	-0.405	-0.075	0.04	0.095	0.93	0.54	-0.02	0.135	0.25	0.525	0.31	-0.045	0.15	0.055	0.105	0.61	0.18	0.475	0.02	0.175	0.175	0.3	0.5	-0.125	0.2	0.2	0.14	-0.235	-0.095	0.25	0.805	0.14	0.53	0.915
BECN1	0.29	0.34	-0.05	-0.04	0.11	-0.04	0.19	0.55	-0.47	0.2	0.06	0.01	0.12	-0.2	-0.02	0.24	-0.37	-0.08	0.23	0	0.43	-0.15	-0.25	-0.73	0.18	0.14	0.29	0.66	0.25	0.32	0.43	-0.17	0.04	0.39	-0.22	0.62	0.06	0.51	-0.28	0.08	0.11	0.27	-0.77	0.38	0.66	-0.67	NA	NA	0.86
BEST1	-0.185	0.05	0.165	0.035	0.595	-0.13	0.26	0.115	-0.2	0.06	0.1	0.015	0.32	0.005	0.04	-0.155	-0.07	0.035	0.07	0.495	-0.005	0.35	-0.055	0.015	0.07	0.095	-0.005	0.31	0.045	-0.095	0.63	0.3	0.115	0.2	-0.185	0.075	-0.01	0.035	-0.165	-0.18	0.065	0.11	-0.14	0.225	0.26	0.305	0.135	-0.02	0.41
BEST2	0.59	-0.6	-0.25	-0.47	0.01	-0.36	-0.71	0.08	-0.4	-0.6	-0.47	-0.35	-0.38	-0.47	-0.02	0.47	-0.46	-0.57	-0.34	0.12	-0.79	-0.04	-0.07	-0.17	-0.89	-0.58	-0.5	-0.86	-0.26	-0.29	-0.54	-0.25	-0.56	-0.86	-0.74	-0.85	-0.51	-0.33	-0.8	-1.04	-0.29	-0.59	0.09	-0.26	-0.68	-0.28	-0.21	0.09	-0.17
BEST3	-0.25	-0.25	-0.03	-0.12	0.55	0.15	-0.11	-0.19	0.37	-0.25	0.12	-0.18	-0.09	0.01	-0.04	0.32	0.29	-0.02	-0.53	0.08	-0.62	-0.01	0.08	0.14	-0.63	-0.22	-0.19	-0.66	-0.38	-0.2	0.02	0.05	0.1	-0.45	0.02	-0.27	-0.61	-0.34	-0.22	-0.56	-0.28	-0.23	-0.04	-0.46	-0.5	-0.88	-0.68	-0.38	-0.34
BET1	-0.27	-0.17	0.07	0.08	-0.07	-0.2	-0.16	0.23	-0.84	-0.14	-0.29	-0.37	-0.4	-0.42	-0.21	-0.89	-0.5	-0.38	0.2	-0.42	0.32	-0.48	-0.29	-0.42	0.32	0.12	-0.32	-0.02	-0.05	-0.08	-0.11	0.51	0.22	0.05	-0.32	0.09	-0.16	0.21	-0.21	-0.18	0.02	-0.09	-0.42	0.14	0.02	0.18	0.58	-0.33	0.12
BET1L	-0.205	-0.13	-0.05	-0.115	-0.03	0.055	0.055	-0.06	-0.315	-0.14	-0.03	-0.265	-0.15	-0.07	0.045	0.365	-0.22	-0.185	-0.08	-0.25	0.03	-0.355	-0.39	-0.05	-0.005	-0.03	-0.15	-0.095	-0.16	-0.205	-0.09	-0.245	-0.215	-0.105	-0.16	0.05	-0.21	-0.13	0.09	0.23	0.215	-0.02	-0.38	-0.265	0.1	-0.4	0.06	0.09	0.03
BEX2	-0.35	-0.02	-0.04	0.05	-0.09	-0.21	0.12	0.23	-0.21	0.17	0.03	0.18	-0.07	-0.07	-0.21	-0.08	-0.07	-0.09	0.23	-0.36	0.23	0.19	0.04	-0.09	0.93	-0.01	-0.02	0.08	-0.15	0.03	0.12	0.01	0.01	-0.07	-0.1	-0.01	-0.23	-0.12	0.01	-0.29	0.08	0.03	-0.15	0.23	0.31	-0.15	-0.14	-0.3	-0.33
BEXL1	1	0.15	-0.04	-0.01	-0.005	-0.26	0.07	0.16	0.01	0.075	-0.13	0.2	0.075	-0.09	0.11	0.14	-0.12	0.035	0.235	0.385	-0.055	0.2	0.23	-0.365	0.08	0.13	0.13	0.16	0.34	0.23	-0.365	-0.07	-0.015	0.255	-0.05	0.02	0.295	-0.085	-0.05	0.08	0.02	-0.085	0.19	0.11	-0.38	0.11	-0.015	-0.04	0.41
BFAR	0.17	0.16	-0.205	-0.14	-0.15	-0.11	0.17	-0.05	-0.395	0.25	-0.095	-0.26	-0.03	-0.005	-0.1	-0.62	-0.18	-0.04	0	0.21	0.06	-0.02	-0.1	-0.06	-0.01	-0.075	-0.155	0.305	0.06	-0.01	-0.46	0.3	-0.18	0.1	-0.03	0.075	0.25	-0.005	-0.04	0.16	0.33	-0.16	0.12	0.02	-1.045	0.155	-0.19	-0.39	0.335
BFSP1	-0.19	0.03	-0.15	0.18	-0.52	0.18	0.03	0.07	0.22	-0.09	-0.04	0.33	0.19	0.03	-0.12	0.13	-0.23	0.15	-0.14	-0.06	-0.02	0.07	-0.08	0.01	0.02	0.37	-0.13	0.1	0.02	-0.09	0.19	-0.02	-0.07	0.1	-0.15	0.19	-0.16	0.42	-0.2	-0.29	0.05	0.03	-0.04	0.32	0.21	-0.21	0.25	-0.76	0.01
BFSP2	-0.45	0.02	-0.03	0.06	0.39	0.06	0.19	-0.01	0.26	0.06	0.17	0.06	-0.16	0.13	-0.17	-0.08	0.36	0.02	-0.26	0.62	-0.28	0.5	-0.05	-0.09	-0.2	-0.14	0.29	0.07	-0.02	-0.09	-0.32	0.16	0.12	0.01	-0.02	0.27	-0.16	0.06	0.17	0.04	-0.02	-0.13	-0.17	-0.28	-0.23	-0.07	-0.06	NA	0.17
BGLAP	0.33	0.29	-0.03	0.16	0.07	0.45	-0.02	0.14	0.42	-0.1	0.24	0.3	0.55	-0.21	0.04	-0.18	0.2	0.34	0.21	0	-0.07	0.11	0.3	0.47	0.36	0.21	-0.04	-0.12	0.31	0.46	0.23	-0.11	0.4	0.13	0.33	0	0.22	0.29	0.18	-0.22	-0.19	0.15	0.41	0.13	0.27	0.34	0.28	0.33	0.09
BGN	-0.34	0.03	0.02	0.05	0.26	0.17	0.36	0.09	0.37	NA	0.28	0.13	-0.29	0.37	0.16	-0.49	0.4	0.32	-0.15	0.03	0.03	0.22	-0.24	-0.01	0.13	-0.18	0.22	0.22	0.04	0.02	0.08	0.16	0.21	0.15	0.34	0.16	-0.14	0.28	0.28	0.26	0.18	0.17	0.02	-0.04	0.15	0.04	0.25	0.23	0.11
BHLHB2	-0.59	0	-0.48	0.01	-0.08	-0.16	0.04	-0.17	0.42	0.1	0.34	-0.02	-0.2	0.29	0.07	0.1	0.24	0.04	-0.25	0.4	-0.2	-0.05	-0.34	0.2	0.06	0.02	-0.06	-0.11	-0.09	-0.13	0.08	0.31	0.2	0.04	0.14	0.01	-0.2	0.08	0.09	0.17	-0.22	0.08	-0.05	-0.19	-0.46	0.24	-0.58	1.27	0.01
BHLHB3	-0.42	-0.07	-0.09	-0.34	-0.24	-0.14	-0.47	-0.13	0.43	-0.38	-0.14	0.17	0.35	-0.12	-0.23	0.78	0.06	0.16	-0.29	-0.24	-0.8	0.28	0.21	0.17	-0.67	-0.13	-0.42	-1.2	-0.56	-0.28	-0.05	-0.32	-0.25	-0.25	0.04	-0.43	-0.42	-0.54	-0.3	-0.94	-0.11	-0.16	0.05	-0.37	-0.43	-0.3	-0.44	-0.35	-0.38
BHLHB4	-0.28	-0.15	-0.16	0.04	-0.05	-0.12	-0.1	0.39	0.07	0.33	0.02	-0.38	-0.41	0.37	0.08	-0.27	0.23	-0.32	-0.17	-0.31	-0.18	-0.33	-0.27	-0.4	-0.02	-0.35	-0.18	0.01	-0.33	-0.22	0.11	-0.06	-0.17	-0.25	0.47	-0.25	-0.03	0.5	-0.03	0.53	0.54	-0.02	-0.07	-0.46	-0.01	0.18	0.1	NA	-0.24
BHLHB9	NA	-0.02	NA	0.27	0.96	0.24	0.19	0.03	NA	NA	-0.21	0.29	0.83	0.15	1.02	-0.46	0.27	-0.12	0.08	NA	0.22	0.15	0.08	0.03	0.17	NA	-0.12	-0.02	0.26	0.31	0.64	-0.25	0.47	-0.01	0.11	-0.95	0.12	0.62	0.01	-0.42	-0.67	0.3	NA	-0.12	-0.51	-0.23	1.07	0.67	-0.26
BHMT	0.05	0.04	0	0.01	0.48	-0.26	0.17	0.13	0.37	-0.09	0.19	0.2	-0.35	0.01	-0.16	0.31	0.3	0.22	0.18	0.08	-0.03	0.11	-0.15	-0.34	-0.19	-0.13	0.21	0.24	0.02	0.07	-0.03	0.26	-0.25	-0.07	-0.02	0.27	-0.02	0.09	0.14	0.05	0.19	0.2	-0.78	-0.1	-0.13	0.53	-0.3	NA	-0.67
BHMT2	0.41	-0.15	0.04	0.16	0.36	0.35	-0.09	0.01	0.16	0.07	-0.03	-0.18	-0.17	-0.05	0.32	-0.45	-0.02	0.02	-0.3	0.29	-0.27	0.13	-0.2	0.75	-0.11	-0.2	0.01	-0.05	-0.12	0.06	0.03	0.65	0.36	-0.17	0.19	0.09	0.03	0.33	0.02	-0.01	0.06	-0.18	0.59	0.01	0.16	0.28	0.24	NA	0.43
BICC1	-0.34	-0.14	0.68	0.28	-0.53	-0.5	0.17	0.17	-0.67	-0.01	-0.04	-0.01	-0.02	-0.32	0.32	-0.65	-0.41	-0.22	0.19	-0.73	0.13	-0.64	-0.74	-0.84	0.41	-0.26	0.06	0.74	0.18	0.36	-0.05	-0.15	0.2	0.3	-0.27	0.16	0.04	0.4	-0.28	-0.07	-0.11	0.14	0.06	0.19	0.54	1.23	NA	NA	0.05
BICD1	0.2	-0.265	-0.065	-0.26	-0.335	-0.24	-0.495	-0.385	-0.15	-0.33	-0.24	-0.265	0.25	-0.35	-0.35	0.485	0	-0.225	-0.28	0.125	-0.43	-0.125	0.13	0.42	-0.37	-0.505	-0.53	-0.79	-0.495	-0.41	0.69	0.34	-0.105	-0.325	-0.27	-0.305	-0.445	-0.185	-0.39	-0.585	-0.43	-0.31	0.15	-0.365	-0.115	-0.685	-0.65	-0.44	-0.235
BICD2	0.575	-0.32	0.095	-0.17	0.34	-0.26	-0.3	-0.21	-0.155	-0.43	-0.3	-0.265	-0.2	-0.29	-0.15	0.75	-0.025	-0.33	-0.445	-0.15	-0.67	0.085	-0.035	-0.27	-0.78	-0.485	-0.4	-0.68	-0.515	-0.31	-0.145	-0.55	-0.385	-0.42	-0.39	-0.235	-0.485	-0.595	-0.335	-0.575	-0.345	-0.39	0.255	-0.47	-0.625	-0.4	-0.325	-0.535	-0.42
BID	0.44	-0.16	0.38	-0.05	0.29	-0.14	0.29	0.4	-0.52	0.03	0.22	0.18	-0.15	-0.3	-0.08	-0.44	-0.14	-0.36	0.42	0.24	0.09	-0.14	-0.51	-0.44	-0.22	-0.12	0.28	0.67	0.21	0.42	0.27	0.07	0	0.54	-0.2	0.12	0.03	0.34	-0.27	-0.13	0.15	0.06	-0.24	0.24	0.17	0.39	0.29	-0.01	-0.18
BIK	-0.36	0	0.42	0.11	0.14	0.24	0.43	0.33	0.1	0.22	0.11	0.08	-0.43	0.04	NA	-0.19	0.3	0	-0.04	NA	-0.17	0.2	-0.2	-0.2	0.23	-0.17	0.2	0.26	0.1	0.3	-0.45	0.5	-0.12	0.22	0.18	0.26	0.24	0.83	0.26	0.65	0.16	-0.02	0.09	-0.07	0.18	0.82	0.93	NA	NA
BIN1	0.4	-0.05	0.12	-0.02	-0.07	-0.36	0.21	-0.09	-0.39	0.2	0.11	-0.1	-0.41	-0.02	-0.08	-0.83	-0.06	-0.04	-0.17	0.04	0.06	-0.24	-0.46	0.04	-0.06	-0.15	0.08	0.42	0.03	0.02	-0.15	0.49	0.04	0.2	0.1	-0.17	-0.06	0.26	-0.11	-0.1	0.33	0.01	-0.06	-0.05	0.13	0.17	0.25	NA	-0.28
BIN2	0.02	0.02	0.45	0.23	0.01	-0.32	0.38	-0.07	-0.82	0.19	0.17	-0.44	-0.62	-0.51	-0.28	-0.46	-0.71	-0.16	-0.02	0.3	0.05	-0.57	-0.4	-0.44	-0.24	-0.12	0.64	0.78	0.25	0.23	-0.2	-0.18	-0.14	0.37	-0.35	0.43	0.13	-0.15	-0.05	-0.01	0.25	0.14	-0.27	0.04	0.25	-0.1	-0.02	0.51	0.27
BIN3	-0.26	0.03	0.32	0.16	0.51	0.16	0.34	0.34	-0.09	0.08	0.19	-0.04	0.29	0.16	0.41	-0.24	0.12	0.21	0.18	0.1	0.35	0	-0.11	0.34	0.43	0.34	0.2	0.46	0.18	0.18	0.36	0.43	0.49	0.42	0.33	0.06	0.02	0.51	0.09	0.4	0.51	0.16	0.33	0.3	1.01	0.33	0.1	-0.23	0.12
BIRC2	NA	0.65	NA	NA	0.25	1.09	0.22	1.32	-0.69	0.27	-0.37	-0.12	NA	-0.81	NA	-0.59	NA	-0.37	-0.5	NA	NA	NA	NA	NA	1.07	NA	0.16	0.47	-0.56	0.42	0.59	0.37	0.26	0.32	0.02	-0.4	0.34	0.75	-0.26	0.38	NA	0.16	NA	NA	NA	NA	NA	NA	NA
BIRC3	-0.06	0	0.01	0.1	0.2	0.09	-0.08	0.29	-0.9	-0.41	-0.54	-0.38	-0.75	-0.5	0.07	-1.22	-1.04	-0.21	-0.29	0.57	0.64	-0.4	-0.21	NA	-0.04	-0.23	0.05	0.9	0.22	-0.01	0.2	0.58	0.68	0.5	-0.62	0.35	0.16	0.51	-0.26	0.36	0.62	-0.4	-0.68	0.75	0.55	NA	-0.94	NA	NA
BIRC4	NA	0.1	NA	-0.23	-0.45	0.48	0.31	NA	-0.26	0.34	0.03	-0.1	-0.79	0.06	NA	-0.59	0.08	-0.04	0.03	0.13	-0.23	0.43	-0.04	-0.52	0.38	0.43	0.17	0.22	0.05	-0.1	-0.28	0.14	-0.84	-0.1	0.08	0.09	-0.04	-0.07	0.32	0.4	NA	0.11	NA	0.03	NA	0.57	NA	NA	-0.23
BIRC5	0.015	-0.2775	-0.1725	-0.0775	0.36	-0.0125	-0.2225	0.145	-0.4475	-0.1825	0.0425	-0.085	-0.1775	-0.305	0.1575	-0.365	-0.4725	-0.265	-0.095	0.0875	-0.275	-0.1425	-0.17	-0.195	-0.3275	-0.2075	-0.1975	-0.2025	-0.085	-0.235	-0.12	0.2	0.015	-0.32	-0.4275	-0.19	-0.065	0.175	-0.305	-0.44	-0.0675	-0.2375	-0.1825	0.0175	-0.135	0.0475	0.09	0.2375	-0.165
BIRC6	0.34	0.13	NA	-0.12	-0.7	-0.62	-0.12	0.71	-0.39	0.13	-0.21	-0.2	-0.17	-0.16	-0.02	-0.66	-0.36	-0.38	0.09	0.22	0.11	-0.88	-0.08	-0.43	-0.04	0.15	-0.01	-0.15	-0.01	0	-0.28	0.15	-0.95	-0.16	-0.53	0.28	-0.11	0.23	0	-0.3	-0.23	-0.07	-0.16	0.04	0.27	NA	NA	NA	NA
BIRC7	-0.39	0.1	NA	-0.6	0.53	0.41	-0.02	-0.66	0.55	-0.03	0.19	0.13	0.03	0.08	0.14	0.52	0.51	0.33	-0.49	-0.19	-0.8	0.2	-0.03	0.73	-0.57	-0.37	0.1	-0.46	-0.23	0.02	-1.06	-0.75	-0.63	-0.05	0.22	-0.13	-0.2	0.36	0.18	-0.02	-0.03	-0.05	-0.15	-0.08	0.72	-0.33	0.44	NA	-0.09
BIVM	0.08	0.04	0.16	0.28	0.45	0.13	0.25	0.36	0.22	0.04	0.18	0.15	0.12	0.08	0.24	-0.47	-0.06	0.03	0.01	0.34	-0.38	0.72	0.18	0.29	-0.33	0.05	0.28	0.11	0.14	0.03	0.17	0.33	0.42	0.07	-0.16	0.25	-0.02	0.22	0.08	-0.21	-0.28	0.1	-0.04	0.1	0.01	0.29	0.55	-0.01	0.07
BLCAP	-0.19	-0.6	-0.25	-0.6	-0.25	-0.67	-0.35	-0.38	-0.74	-0.24	-0.56	-0.82	-0.72	-0.71	-0.58	0.06	-0.83	-0.75	-0.64	0.63	-0.58	-0.2	-0.45	-0.57	-0.67	-0.63	-0.56	-0.31	-0.44	-0.48	-0.83	-0.23	-0.46	-0.56	-0.76	-0.45	-0.41	-0.3	-0.66	-0.49	-0.21	-0.77	-0.27	-0.49	-0.61	-0.66	-0.67	-0.64	-0.63
BLK	NA	-0.26	NA	0.78	0.38	NA	-0.21	NA	0.41	-0.02	0.03	-0.02	-1.39	0.34	NA	-0.42	0.03	0.06	-0.63	0.86	0.12	0.13	-0.43	-0.73	0	-0.04	0.15	-0.02	-0.21	0.26	NA	NA	0.53	-0.25	0.65	-0.03	-0.05	1.13	0.57	0.86	1.73	0.22	NA	-0.29	NA	NA	NA	NA	NA
BLM	0.36	0.04	0.2	0.2	0.08	0.43	0.4	0.29	-0.53	0.08	-0.06	-0.17	-0.69	-0.1	0.08	-0.27	-0.3	-0.13	-0.21	0.41	0.4	0.42	-0.36	-0.18	0.05	-0.18	-0.12	0.54	0.02	-0.14	0.54	0.41	-0.08	-0.01	0.03	0.43	-0.16	0.29	0.17	0.37	0.54	0.73	0.15	0.4	1.33	0.15	NA	NA	-0.28
BLMH	-0.14	0.05	0.01	0.08	-0.18	-0.12	0.22	-0.13	-0.01	0.12	-0.12	-0.26	-0.25	0.07	-0.12	0.11	0.04	0.03	-0.12	-0.24	-0.13	-0.19	-0.26	-0.28	-0.24	-0.1	0.14	0.26	-0.05	0.17	-0.11	-0.27	-0.3	0.13	0.26	0.09	-0.03	-0.02	0.32	0.15	0.06	0.1	0.13	-0.1	-0.11	0.01	0.45	-0.04	-0.21
BLOC1S1	-0.33	0.07	0.09	0.07	-0.32	0.01	0.32	0.36	-0.03	0.32	0.36	0.14	-0.21	0.06	0.1	-0.23	0.26	0.07	-0.27	-0.09	-0.34	0.13	-0.34	-0.05	-0.53	-0.36	0.3	0.49	0.02	-0.03	-0.01	-0.03	0.24	0.07	-0.03	0.14	0.06	0.04	0.09	0.21	0.19	0.16	0.07	0	-0.15	0.1	0.86	0.48	0.38
BLR1	-0.4	0.06	0.2	0.03	0.13	0.3	0.2	0.08	0.31	-0.14	0.2	0.18	0.34	0.08	0.05	-0.35	0.36	0.21	-0.35	0.41	-0.08	0.14	0.13	0.1	-0.38	-0.3	0.2	-0.21	-0.11	0.23	0.27	0.38	0.34	-0.03	0.24	-0.08	0.04	0.16	0.07	-0.35	0.3	0.09	0.08	0.08	0.14	-0.21	0.01	0.23	0.1
BLVRA	-0.01	0.13	0.39	0.14	-0.06	0.12	0.19	0.21	-0.08	0.22	0.03	-0.05	-0.13	0.07	-0.03	0.2	0.15	0	0.02	0.04	-0.14	0.09	-0.13	0.24	-0.31	-0.17	0.11	0.05	-0.1	0.11	-0.34	-0.36	-0.4	-0.11	-0.06	-0.01	0.08	-0.09	0.2	0	0.2	-0.03	-0.02	0.06	-0.17	0.08	0.35	0.2	0.29
BLVRB	1.37	-0.01	0.19	-0.05	-0.22	0.32	-0.02	0.3	0.28	-0.05	0.38	0.35	0.36	-0.26	0.45	0.31	-0.11	0.07	0.09	0.06	-0.25	0.32	0.15	0.49	-0.38	-0.21	0.28	-0.24	0.09	0.19	0.25	0.29	0.08	0.12	0.01	-0.17	0.18	0.22	-0.35	-0.35	0.04	0.39	0.17	0.41	-0.26	0.28	0.16	0.28	0.34
BLZF1	-0.16	-0.14	-0.12	0.75	0.04	0.39	0.345	0.72	-0.22	-0.07	-0.09	0.035	-1.16	0.03	0.29	-0.12	-0.265	0.04	0.13	-0.48	0.14	-0.32	-0.22	0.32	-0.3	0.15	0.15	0.135	0.01	0.12	0.25	1.13	0.09	0.75	-0.13	0.1	-0.09	0.02	0.17	0.49	0.41	0.08	-0.2	-0.13	0.08	NA	-0.29	NA	NA
BMF	0.19	-0.28	-0.73	-0.29	-0.11	-0.24	-0.24	0	-0.38	-0.07	-0.37	-0.25	-0.44	-0.18	-0.09	0.32	-0.4	-0.35	-0.22	-0.42	-0.29	-0.21	-0.33	-0.26	-0.2	-0.2	-0.28	-0.13	-0.35	-0.38	-0.48	-0.36	-0.09	-0.12	-0.22	-0.12	-0.42	0	0.58	0.06	-0.16	-0.37	-1.09	-0.52	-0.18	-0.28	-0.3	0.65	-0.26
BMI1	NA	0.26	NA	0.93	-0.43	NA	0.08	0	-0.24	-0.17	-0.47	-0.21	-0.45	-0.16	-0.11	0.15	-0.3	0.06	0.25	0.04	0.32	-0.61	0.12	NA	0.27	-0.13	-0.17	0.54	0.59	0.41	-0.15	-0.92	-0.09	0.12	0.16	0.18	-0.01	0.32	0.02	0.2	0.39	0.02	0.39	0.07	-0.02	NA	NA	NA	0.78
BMP10	-0.25	0.2	-0.17	0.02	-0.51	-0.06	0.09	-0.26	-0.06	0.19	0.01	-0.15	0.01	0.03	0.19	0.16	-0.21	0.07	0.19	0.3	0.27	-0.9	-0.21	-0.14	0.11	-0.01	0	0.21	-0.08	-0.07	-0.48	-0.13	-0.1	-0.2	-0.12	0.72	0.18	0.21	-0.04	0.32	0.2	0.23	0.02	-0.11	-0.07	-0.1	-0.56	-0.18	0.02
BMP15	0.12	-0.11	0.01	-0.28	0.33	-0.08	0.33	-0.09	-0.21	0.11	0.19	0.19	-0.43	0.16	0.11	-0.37	0.01	0.09	-0.05	-0.34	-0.17	0.44	-0.06	0.03	0.09	-0.02	0.17	0.12	0.07	0.21	0.24	0.2	-0.08	-0.05	-0.1	0.01	-0.25	-0.15	-0.27	-0.28	0.29	0.04	0.19	0.2	0.15	-0.01	0.42	0.38	0.03
BMP2	-0.04	-0.03	-0.41	-0.1	-0.15	0.14	0.03	0.04	0.21	-0.02	0.1	-0.12	0.07	-0.04	0.03	0.5	0	0.19	-0.13	-0.52	-0.09	0.4	0.2	-0.1	-0.33	-0.13	0.07	0.1	0.21	0	-0.03	-0.5	-0.08	0.17	0	0.21	-0.16	-0.25	0.12	0.07	0.01	-0.03	-0.47	0.07	-0.17	-0.3	0.31	NA	-0.21
BMP2K	-0.26	-0.0833333	0.383333	0.19	0.103333	0.0333333	0.02	-0.035	-0.546667	-0.0533333	-0.316667	0.02	-0.32	-0.0566667	-0.365	-0.806667	-0.343333	-0.15	-0.0566667	0.0766667	0.06	-0.0866667	-0.22	-0.04	0.12	-0.19	-0.16	0.133333	0.0266667	-0.0266667	-0.296667	0.03	0.00333333	-0.0866667	-0.33	-0.16	-0.246667	0.263333	-0.03	0.0266667	0.0733333	-0.23	-0.0466667	0.14	0.11	-0.0833333	0.035	-0.185	-0.0933333
BMP3	0.08	-0.03	NA	-0.69	NA	-0.02	0.1	-0.02	0.84	-0.05	-0.19	0.47	0.37	0.3	0.25	-0.32	0.29	0.29	0.33	0.27	NA	NA	0.44	0.38	0.31	-0.94	-0.2	NA	0.06	-0.25	NA	-0.16	-0.34	-0.27	0.21	0.27	NA	-0.12	0.01	-0.65	0.25	0.38	NA	NA	NA	1.34	0.28	NA	0.21
BMP4	0.4	-0.33	-0.18	-0.07	0.05	-0.02	-0.13	0	0.19	-0.27	-0.19	-0.16	-0.09	-0.2	0	0.03	-0.01	-0.19	-0.33	-0.31	-0.26	0.09	-0.15	-0.17	-0.24	-0.22	-0.18	-0.21	-0.16	-0.23	-0.04	0.06	-0.18	-0.24	-0.15	-0.38	-0.4	0.17	-0.34	-0.56	0	-0.14	-0.12	NA	0.26	0.02	-0.29	-0.07	-0.3
BMP5	NA	0.18	0.07	0.05	-0.77	-0.89	0.23	NA	-0.44	0.18	0.06	-0.22	NA	-0.11	-0.34	-0.31	-0.29	0.01	0.37	0.16	-0.43	-1.21	-0.27	-0.34	0.2	-0.12	-0.27	0.51	NA	0.34	0.05	-0.2	0	0.31	0.28	0.28	0.2	0.18	-0.13	0.15	0.41	0.26	NA	0.12	NA	NA	NA	NA	-0.25
BMP6	-0.22	-0.37	-0.2	-0.23	-0.53	-0.18	-0.65	-0.74	0.56	-0.56	-0.34	-0.27	-0.51	-0.04	-0.35	1.32	0.32	-0.24	-1	-0.6	-1.39	-0.43	-0.46	-0.29	-1.07	-0.67	-0.45	-1.12	-0.72	-0.42	-0.65	-0.74	-0.87	-0.71	0.12	-0.58	-0.59	-0.82	0.02	-0.63	-0.95	-0.56	0.03	-0.89	-1.4	-0.25	NA	NA	NA
BMP7	0.69	-0.2	0.07	0.19	-0.38	0.43	-0.12	0.3	0.17	0	0.16	0.01	-0.1	0.07	0.3	0.33	0.07	-0.09	-0.33	-0.35	-0.57	0.07	-0.34	0.22	-0.6	-0.29	-0.13	-0.16	0	-0.11	0.2	0.15	0.02	-0.29	0.04	-0.26	-0.12	-0.4	0.15	-0.18	0.06	-0.01	-0.03	0.02	-0.02	-0.26	-0.07	0.15	0.06
BMP8A	0.55	0.09	0.2	0.1	0.24	0.24	0.06	0.3	0.21	-0.06	0.3	0.01	-0.1	0.07	-0.08	0.37	0.05	0.35	0.12	-0.46	-0.18	0.13	0.09	-0.4	-0.23	0.16	0.04	0.11	0.04	0.02	0.13	-0.32	0	0.08	-0.01	0	0.3	-0.13	-0.1	-0.16	-0.53	0.1	-0.53	0.02	-0.16	0.03	0.11	0.09	-0.05
BMP8B	0.27	0.12	0.15	-0.44	-0.23	-0.46	0.08	-0.09	0.09	0.17	-0.11	-0.17	-0.33	-0.03	0.05	0.19	-0.01	-0.05	0.12	0.17	-0.14	-0.47	0.11	-0.38	-0.07	0.04	0.08	0.15	-0.13	0.1	-0.5	-1.06	-0.27	-0.11	0.19	-0.1	0.19	-0.18	0.16	0.07	-0.34	-0.21	0.46	-0.11	-0.44	0.08	-0.06	-0.94	-0.1
BMPR1A	-0.38	0.27	-1	-0.24	-0.83	-0.18	0.08	0	-0.01	0.47	0.19	-0.07	-0.67	0.09	-0.78	0.89	0.22	0.25	-0.22	-0.52	-0.13	-0.18	-0.18	-0.01	-0.27	-0.28	0.04	0.27	0.33	0.14	-0.47	-0.29	0.13	0.26	0.06	0.22	0.07	-0.04	0.39	0.21	-0.44	-0.06	-0.16	0.28	-0.02	-0.35	0.08	NA	NA
BMPR1B	0.4	-0.09	0.56	0.2	0.13	NA	0.04	0.76	-0.22	NA	-0.07	-0.11	-0.48	-0.04	-0.15	-2.27	0.09	-0.04	-0.18	NA	0.31	0.24	-0.89	0.96	-0.23	NA	-0.63	-0.13	-0.32	-0.57	0.45	0.71	1.62	0.64	-0.24	-0.18	-0.13	-1.05	0.01	0.07	-0.78	-0.16	0.39	0.63	0.64	NA	NA	NA	NA
BMPR2	-0.33	0.06	-0.36	-0.39	0.9	-0.13	0.17	0.16	-0.06	-0.19	0.13	0.08	0.26	0.07	0.09	-0.26	-0.06	0.04	0.01	0.7	-0.1	0.22	0.2	-0.05	-0.07	0.09	0.01	-0.11	0.09	-0.08	0.27	1.43	0.44	-0.05	-0.09	0.2	-0.09	-0.05	0.17	-0.07	-0.28	-0.03	-0.16	0.05	-0.15	0.45	0.46	0.24	0.02
BMS1	-0.19	0.03	-0.31	0.04	0.07	0	0.15	0.16	0.23	0.03	0.21	0.1	-0.08	0.1	0.37	-0.13	0.25	-0.02	-0.26	1	-0.57	0.06	-0.08	0.17	-0.46	-0.18	0.17	0.13	0.13	0.11	-0.36	0.02	0.01	-0.06	0.05	0.06	1.05	-0.03	0.06	0.07	0.42	0.09	0.62	0.07	-0.55	NA	NA	0.45	0.31
BMX	-0.3	-0.26	NA	-0.08	0.18	-0.19	0.37	0.03	-0.2	-0.05	0.11	-0.09	-0.44	0.14	-0.15	-0.61	-0.14	-0.29	-0.25	0.36	-0.24	-0.17	-0.34	0.12	-0.26	-0.28	0.11	0.3	-0.09	-0.19	0.33	0.23	-0.11	0.13	-0.2	0.16	-0.18	0.34	-0.09	0.2	0.25	-0.02	0.26	-0.26	0.32	0.1	-0.25	NA	0.37
BNC1	0.58	0.02	0.06	0.1	0.32	0.1	0.07	0.26	0.03	-0.04	0.05	0.03	0.57	0.01	0.05	-0.46	0.05	-0.02	0.02	0.01	0.04	0.4	0.19	-0.19	0.06	0.12	0.1	0.07	0.03	0	0.29	0.34	0.64	-0.07	-0.18	0.05	0.06	0.06	0.01	0.03	0.49	-0.01	-0.03	0.08	0.58	-0.09	0.11	0.58	0.01
BNC2	0.14	-0.18	0.28	-0.17	-0.13	-0.51	0.17	-0.5	0.26	0.08	0.11	-0.03	0	0.09	-0.21	0.68	-0.02	0.14	-0.44	-0.34	0.28	-0.6	-0.37	0.36	0.23	NA	0.04	0.34	0.15	0.22	0.34	-0.19	-0.37	0.21	0.26	0.67	-0.14	-0.16	0.38	0.65	0.1	0.14	0.61	0.28	0.57	0.15	0.33	NA	0.06
BNIP1	0.76	-0.085	0.135	0.305	0.45	0.315	0.06	0.41	-0.105	0.055	0.245	0.145	-0.6	0.11	0.425	0.12	-0.005	-0.065	-0.065	-0.245	-0.29	0.28	-0.33	0.195	-0.43	-0.25	0.09	0.15	0.13	-0.12	0.075	0.09	0.05	-0.33	-0.255	0.06	-0.1	0.245	0.04	0.1	0.32	-0.08	-0.37	0.19	0.03	-0.105	0.16	0.385	-0.31
BNIP2	-0.52	0.25	-0.23	-0.06	-0.28	-0.43	-0.12	0.35	-1.02	-0.22	-1.23	-1.45	-0.99	-0.56	0.07	0.27	-0.8	-0.51	0.47	-0.57	0.16	-0.49	-0.57	-1.06	0.08	0.14	0.02	0.91	0.23	0.18	0.29	-0.05	-0.77	0.29	0.03	0.03	-0.06	-0.07	-0.55	0.11	1.03	-0.75	0.3	0.15	1.03	-0.87	-0.56	NA	NA
BNIP3	-0.15	-0.09	-0.21	0.37	0.28	0.1	0.23	0.21	0.11	0.17	-0.02	0.48	-0.37	0.18	0.16	-0.24	0.39	0.23	-0.53	-0.27	-0.31	-0.17	-0.46	-0.01	-0.5	-0.31	0.15	0.15	0.11	0.12	0.02	0.01	0.23	0.03	-0.13	0.02	-0.09	0.35	0.14	0.12	0.14	0.01	0.17	0.26	0.07	-0.3	-0.44	-0.02	0.17
BNIP3L	-0.32	-0.13	-0.43	0.39	0.05	0.11	0.43	0.54	-0.69	0.2	0.27	0.25	-0.19	-0.5	0.36	-0.46	-0.59	0.3	0	0.27	0.18	0.6	-0.15	0.1	-0.24	-0.16	0.36	0.06	-0.15	0.06	0.15	0.73	0.63	-0.19	-0.24	-0.32	-0.14	0.1	-0.6	-0.89	0.31	0.36	-0.22	0.03	0.54	-0.01	0.7	0.9	0.03
BOC	-0.33	-0.09	0.06	-0.15	0.33	-0.13	-0.22	-0.03	0.23	-0.03	-0.03	-0.14	-0.07	0.05	0.07	-0.3	0.16	0.08	-0.11	0.69	-0.24	-0.08	0.15	0.19	-0.22	0.02	-0.1	-0.15	-0.07	-0.3	-0.14	0.13	-0.04	-0.22	0.02	-0.12	-0.24	0.1	0.14	-0.27	-0.35	-0.32	0.1	-0.41	-0.14	-0.29	-0.19	0.04	-0.06
BOK	-0.28	-0.03	-0.04	-0.02	-0.09	-0.01	-0.1	0.04	0.07	0.09	-0.21	-0.3	-0.05	0.29	-0.21	0.15	0.06	-0.16	-0.17	-0.11	-0.18	0.5	0.03	0.53	-0.12	-0.02	0.04	0.07	-0.16	-0.14	0.03	0.23	-0.04	-0.08	0.14	0.05	-0.22	0.04	0.08	-0.02	-0.14	-0.23	0.02	-0.24	-0.12	-0.44	-0.09	-0.82	-0.31
BOLA1	-0.16	-0.18	-0.05	-0.13	-0.06	-0.18	0.03	-0.04	-0.03	-0.1	-0.04	-0.27	-0.35	0.32	-0.21	-0.17	0	-0.05	-0.04	-0.44	0.14	-0.18	-0.37	-0.01	0.34	-0.08	-0.2	0.09	-0.14	-0.25	0.23	-0.3	-0.29	-0.09	0.31	0.2	-0.24	0.29	0.1	0.04	0.04	0.06	0.11	-0.07	0.96	0.17	0.13	-0.95	-0.06
BOLA2	0.05	-0.14	0.39	0.06	0.58	0.09	-0.04	-0.17	0.04	NA	-0.13	-0.21	-0.19	-0.22	-0.3	-0.14	-0.36	-0.06	-0.08	-0.18	0.52	-0.1	-0.15	-0.13	0.25	0.32	-0.17	-0.04	-0.16	0.13	0.4	0.17	0.17	-0.16	-0.09	-0.27	-0.14	0.06	0.02	-0.01	0	-0.06	-0.01	0.35	0.46	0.15	0.36	0.08	0.04
BOLL	-0.39	-0.04	0.13	0.13	0.64	0.33	0.06	0.35	-0.16	0.1	0.06	0	0.19	0.15	0.36	-0.32	0.09	0.11	-0.14	0.31	0.18	-0.11	0.06	0.02	0.22	0.21	0.02	0.09	0.03	0.09	0.25	0.52	0.37	-0.16	0.11	0.06	-0.01	0.31	0	-0.25	0.28	0.09	-0.7	0.04	0.58	0.05	0.29	0.18	0.44
BOP1	1.43	0.21	-0.19	0	1.12	-0.08	0.26	0.04	0.15	0.09	0.09	-0.01	-0.12	-0.02	0.01	0.42	0.13	0.12	0.09	-0.06	0	0.32	0.19	-0.23	0.05	0.03	0.27	0.07	0	0.12	0.26	-0.73	-0.45	0.09	0.1	0.12	-0.04	-0.1	0.12	-0.16	0.57	0.05	0.19	0.06	-0.29	-0.44	-0.21	-0.04	-0.15
BPESC1	0.19	-0.22	-0.57	-0.03	-0.05	-0.24	-0.05	-0.21	0.18	-0.08	-0.1	-0.01	-0.01	-0.12	-0.15	0.09	-0.06	-0.08	0.01	-0.56	0.2	0.38	-0.09	-0.29	-0.26	-0.16	-0.2	-0.46	0.02	-0.29	-0.3	-0.55	-0.35	-0.11	-0.09	0.13	-0.21	-0.3	-0.02	0.01	-0.51	-0.03	-0.31	-0.18	-0.51	0.14	-0.44	0.79	-0.23
BPGM	-0.28	-0.15	0.08	-0.03	-0.26	-0.12	-0.25	-0.07	0.39	-0.21	0.11	-0.05	-0.33	0.18	-0.19	0.3	0.36	-0.17	-0.18	-0.02	-0.62	-0.14	-0.18	0.14	-0.55	-0.32	-0.1	-0.54	-0.19	-0.28	-0.35	-0.29	-0.07	-0.53	-0.13	-0.49	-0.21	-0.33	0.06	-0.35	-0.1	-0.25	0.29	-0.1	-1.04	-0.69	-0.26	0.03	-0.72
BPHL	NA	0.29	0.48	0.45	-0.35	0.22	0.1	0.27	0.3	0.38	0.21	0.64	-0.48	0.2	0.91	-0.27	0.38	0.2	-0.02	0.46	-0.2	0.35	-0.24	0.99	0.09	NA	0.22	0.16	-0.01	0.06	0.16	1.15	0.17	0.18	0.27	-0.22	0.13	0.51	0.23	0.07	0.14	0.2	-0.05	0.09	-0.27	0.36	-0.07	NA	0.18
BPI	0.64	-0.76	-0.22	-0.19	0.28	-0.06	-0.78	-0.38	-0.29	-0.41	-0.43	-0.53	-0.73	-0.66	-0.33	1.01	-0.29	-0.71	-1.2	-0.55	-1.68	-0.09	-0.8	-0.28	-1.67	-1.1	-0.57	-1.73	-0.88	-0.94	-0.52	-0.85	-0.59	-1.05	-0.95	-0.35	-0.81	-0.8	-0.66	-1.17	-0.46	-0.76	0.3	-0.91	-0.82	-0.96	-0.94	-0.87	-0.49
BPIL1	-0.45	-1.14	-0.4	-0.89	-1.31	-0.87	-1.21	-1.02	-0.84	-1.38	-1	-0.95	-0.44	-0.7	-0.98	1.09	-0.74	-1.21	-1.07	-0.65	-0.78	-0.37	-0.62	-0.55	-0.8	-0.88	-1.23	-1.35	-0.96	-0.94	0.07	0.02	-0.82	-1.02	-1.24	-1.11	-0.88	-0.5	-0.9	-0.49	-0.41	-1.1	-0.55	-1.01	-0.25	-1.39	-1.49	-1.26	-0.79
BPIL2	-0.34	-0.39	-0.12	-0.2	-0.34	-0.2	-0.28	-0.2	0.02	-0.35	-0.31	0	-0.26	-0.21	-0.15	-0.03	-0.08	-0.03	-0.17	-0.52	-0.24	-0.27	-0.07	-0.34	-0.15	-0.04	-0.2	-0.53	-0.26	-0.24	-0.13	0.07	0.13	-0.27	-0.06	-0.15	-0.72	-0.12	-0.15	-0.67	-0.45	-0.09	-0.11	-0.42	-0.51	0.02	-0.09	-0.55	-0.46
BPNT1	0.61	0.03	-0.21	-0.05	-0.13	0.56	-0.26	0.42	-0.03	0.18	0.41	0.71	0.22	-0.22	0.27	0.3	-0.1	0.2	0.08	-0.18	-0.14	0.54	0.48	0.03	-0.2	-0.05	0.29	-0.03	0.36	0.14	0.1	0.18	0.2	-0.04	-0.43	0.13	0.12	0.19	-0.36	-0.67	-0.35	0.06	-0.22	0.53	-0.27	0.44	0.19	0.06	0.01
BPTF	0.436667	0.0333333	0.22	0.0333333	-0.413333	-0.11	-0.02	-0.0466667	0.126667	0.03	0.106667	0.303333	0.496667	-0.16	-0.0366667	-0.0533333	-0.256667	0.22	0.273333	0.383333	0.54	0.23	0.533333	0.57	0.52	0.82	0.00666667	0.09	0.316667	0.246667	0.636667	0.166667	-0.346667	0.243333	-0.0233333	0.11	0.243333	0.14	-0.146667	-0.153333	0.38	0.313333	0.63	0.42	0.153333	-0.116667	0.17	-0.12	0.496667
BPY2	0.14	0.03	-1.01	-0.26	0.71	0.21	0.07	-0.33	-0.28	-0.35	-0.37	0.16	-0.08	-0.13	-0.02	0.43	0.06	0.05	0.16	-0.32	0.11	-0.13	0.09	-0.28	0.14	0.03	-0.05	-0.2	-0.1	0.32	-0.06	-0.28	-0.41	-0.01	0.01	0.34	0.06	-0.07	-0.05	0.42	-0.1	-0.01	0.18	-0.07	-1.33	0.39	-0.45	-0.35	-0.28
BRAF	-0.34	-0.24	-0.05	-0.25	0.14	-0.1	-0.35	0.05	0.03	-0.25	-0.43	-0.08	-0.42	0.13	0.01	0.35	0.15	-0.48	-0.45	-0.1	-0.77	-0.18	-0.65	-0.56	-0.6	-0.59	-0.42	-0.39	-0.28	-0.29	-0.33	-0.72	-0.34	-0.09	-0.26	0.02	-0.24	-0.06	0.21	0.64	-0.37	-0.33	0.05	-0.22	-0.76	-0.47	-0.1	-0.61	-0.49
BRAP	0.33	0.1	-0.09	0.44	0.17	0.31	0.13	0.21	0.01	0.05	0.25	0.12	-0.02	0.03	0.34	-0.28	0.31	0.21	-0.2	0.14	-0.36	0.56	-0.1	0.55	-0.23	-0.09	0.22	-0.08	-0.03	0.07	0.56	0.45	0.36	0.09	0.02	-0.01	-0.13	0.37	-0.05	0.11	0.72	0.2	0.32	0.24	0.43	0.18	-0.05	-0.18	-0.14
BRCA1	0.55	0	0.02	0.03	0.65	0.41	-0.02	0.16	0.4	-0.09	0.01	0.24	0.33	0.08	-0.02	-0.2	0.07	0.18	0.09	-0.01	0.48	0.44	0.46	0.13	0.39	0.55	0.01	-0.24	-0.04	0.03	-0.01	0.35	0.34	0.17	0.14	-0.02	0.11	-0.24	0.11	-0.3	0.13	-0.1	-0.02	0.12	0.1	0.13	-0.19	0.34	0.29
BRCA2	0.14	0.32	0.26	0.17	0.55	0.52	0.16	0.28	0.25	-0.05	0.19	0.24	0.14	0.35	0.49	-0.1	0.33	0.29	-0.29	0.58	-0.37	0.61	-0.23	0.62	-0.17	-0.09	0.1	-0.37	0.04	0.05	0.73	0.91	-0.06	-0.28	0.05	-0.16	0.03	0.48	0.2	0.21	0.32	0.12	0.33	0.03	0.44	0.14	NA	0.17	0.63
BRCC3	0.39	0.12	1.305	0.315	0.165	-0.095	0.19	0.44	0.045	0.23	0.265	0.19	-0.16	0.27	-0.12	0.54	0.26	0.02	-0.255	-0.335	-0.385	0.085	-0.055	0.405	-0.425	-0.29	0.13	0.13	0.015	0.08	0.04	0.115	0.085	-0.02	-0.11	-0.04	0.06	0.26	0.17	0.385	0	0.13	0.025	0.065	1.025	-0.12	NA	0.52	NA
BRCTD1	-0.51	-0.185	-0.32	-0.075	-0.54	-0.255	-0.03	-0.28	-0.44	-0.27	0.045	-0.115	0.02	-0.175	-0.15	0	-0.195	-0.06	-0.065	-0.41	0.23	-0.495	0.065	0.485	0.065	0.3	-0.115	-0.09	-0.18	-0.07	-0.265	-0.87	0.1	-0.365	-0.11	-0.155	-0.125	-0.68	-0.38	-0.2	-0.165	-0.08	-0.5	-0.12	-0.055	0.22	0.175	0.81	0.005
BRD1	-0.1	-0.27	0.23	0.21	-0.12	-0.3	0.03	0.13	-0.45	0.07	-0.08	0.02	-0.36	-0.22	-0.01	0.01	-0.57	-0.13	0.02	0.52	-0.22	0.16	0.15	0.44	-0.02	-0.11	0.12	0.39	0.25	-0.05	-0.33	0.22	-0.25	-0.14	-0.03	-0.02	0.03	-0.13	-0.26	-0.49	0.42	-0.18	0.05	0.4	-0.36	0.25	-0.01	0.22	0.15
BRD2	-0.81	-0.04	-0.58	-0.26	-0.1	-0.21	0.13	-0.05	-0.09	0.04	-0.12	-0.47	-0.28	0.03	-0.76	-0.53	-0.22	-0.35	-0.25	0.6	-0.21	-0.54	-0.42	-0.67	0.07	-0.28	-0.21	0.07	-0.07	-0.09	0.16	0.33	0.07	0.05	0.14	0.09	-0.32	-0.27	0.13	0.44	0.6	-0.26	-0.07	-0.26	0.17	-0.01	-0.07	-0.21	-0.11
BRD3	1.06	0.42	0.29	0.17	0.31	0.16	0.42	0.22	0.22	0.13	0.55	0.2	-0.21	0.36	0.32	0.09	0.28	0.2	-0.1	-0.78	-0.42	0.36	-0.17	-0.22	-0.28	-0.24	0.34	0.23	-0.04	0.28	0.27	-0.56	-0.16	0.31	0.01	0.29	-0.03	0.1	-0.07	-0.12	0.23	0.13	0.22	0.27	-0.13	-0.83	0.37	-0.34	0.15
BRD4	-0.315	-0.185	0.115	-0.05	-0.075	-0.08	0	0.12	-0.14	0	0.025	-0.24	-0.525	0.05	0.01	0.12	-0.17	-0.255	0.01	-0.16	-0.01	0.23	-0.285	-0.785	0.16	-0.075	-0.125	0.125	0	-0.165	0	-0.455	-0.04	-0.075	0.11	-0.055	-0.08	0.165	-0.08	-0.025	-0.585	-0.155	-0.145	-0.005	0.045	-0.2	-0.11	NA	-0.455
BRD7	-0.08	-0.03	-0.02	-0.13	0.06	-0.21	0.14	-0.02	-0.46	0.12	-0.01	-0.24	-0.51	-0.26	-0.07	-0.08	-0.59	-0.14	0.03	0.32	0.32	-0.56	-0.08	-0.52	0.05	-0.02	0.05	0.46	0.02	-0.11	-0.36	-0.29	-0.07	0.04	-0.49	-0.02	-0.01	0.24	-0.21	0.01	0.04	-0.05	0.05	0.1	-0.02	-0.49	-0.32	-0.12	-0.41
BRD8	0.77	0.13	0.01	0.24	-0.41	0.15	-0.19	0.2	0.03	0.05	0.07	0.01	-0.07	-0.26	-1.07	-0.83	0.03	0.12	0.14	-0.46	0.21	-0.69	NA	0.2	-0.04	0.16	-0.08	0.06	0.08	0.35	-0.1	-0.97	-0.17	0.21	0.08	0.1	-0.02	-0.59	-0.08	0.04	0.1	0.05	-0.01	0.14	0.95	-0.27	0.55	NA	NA
BRD9	NA	0.16	0.17	0.46	0.08	0.22	0.08	0.14	-0.04	0.08	0.18	0.1	0.29	0.12	0.7	-0.68	0.1	0.19	0.46	0.61	0.41	0.34	0.15	0.77	1.02	NA	0.09	0.33	0.01	-0.11	0.52	0.85	0.5	0.34	0.07	-0.05	0.18	0.05	-0.03	-0.06	0.26	-0.01	0.54	-0.07	0.66	-0.38	0.66	NA	NA
BRDT	0.25	0.09	0.31	-0.07	-0.32	-0.27	0.02	-0.63	0.03	0.05	0.23	0.09	-0.03	-0.1	-0.87	-0.06	0.02	0.09	0.07	-0.48	0.11	0.06	0.01	-0.06	0.24	0.09	0.02	0.23	0.21	0.13	-0.28	-0.21	-0.04	0.17	0.2	0.21	0.14	0.09	0.05	0.1	-0.28	0.1	0.36	-0.13	-0.13	-0.05	NA	NA	NA
BRE	0.42	-0.04	0.01	-0.04	0.22	-0.195	0.42	-0.05	-0.295	-0.12	-0.06	-0.125	-0.125	-0.235	-0.025	0.61	0.005	-0.12	-0.17	-0.245	-0.275	-0.005	0.045	-0.14	-0.36	-0.26	-0.12	-0.235	-0.17	-0.195	-0.085	-0.37	-0.205	-0.195	-0.345	-0.21	-0.19	-0.35	-0.155	-0.08	-0.085	-0.105	0.035	-0.24	-0.365	-0.16	-0.325	-0.515	-0.065
BRF1	0.0466667	-0.04	-0.33	-0.146667	-0.26	-0.0933333	-0.213333	-0.496667	-0.06	-0.0533333	-0.3	-0.37	-0.0966667	-0.236667	-0.393333	0.546667	-0.153333	-0.116667	-0.133333	-0.15	-0.09	-0.116667	-0.113333	-0.35	-0.123333	-0.01	-0.403333	-0.26	-0.186667	-0.0933333	-0.333333	-0.556667	-0.39	-0.0933333	0.126667	-0.1	-0.1	-0.25	-0.136667	-0.263333	-0.176667	-0.32	-0.283333	-0.186667	-0.196667	-0.48	-0.0633333	-0.12	-0.07
BRF2	-0.34	-0.08	NA	0.28	0.24	0	-0.12	-0.15	0.04	-0.13	-0.02	-0.09	-0.36	0.16	-0.28	-0.59	-0.18	-0.26	0.03	0.91	-1	0.39	-0.13	-0.21	-0.5	-0.39	0.07	0.05	-0.09	-0.26	0.06	0.63	0.46	-0.19	-0.26	-0.16	-0.22	0.11	-0.05	-0.37	0.04	0.08	0.43	-0.04	0.01	0.68	-0.41	NA	0.01
BRI3	-0.31	-0.15	0.29	-0.65	0.31	-0.4	0.22	-0.2	-0.54	0.13	0.26	-0.12	-0.09	-0.01	-0.35	0.12	0.11	-0.34	0.11	-0.33	0.06	-0.37	-0.24	-0.56	0.24	-0.22	-0.21	0.48	-0.03	-0.08	-0.38	-0.48	-0.19	0.23	0.08	-0.13	-0.03	-0.14	0.08	0.15	0	0.01	-0.26	0.07	0.13	0.98	0.4	0.12	0.45
BRIP1	-0.39	0.1	-0.56	0.05	0.48	0.04	0.07	0.06	0.29	-0.19	0.16	0.07	0.66	0.26	-0.12	0.11	0.14	0.1	0.16	-0.16	0.23	0.47	0.41	0.33	0.27	0.66	-0.28	-0.09	0.12	NA	0.54	0.78	0.16	0.1	0.37	-0.06	-0.04	0.46	0.12	-0.05	-0.04	0.13	0.25	-0.1	0.57	-0.26	-0.14	NA	0.97
BRMS1	0.27	-0.07	-0.075	0.13	0.66	-0.115	-0.05	0.045	0.145	-0.145	0.14	0.255	0.04	0.125	-0.125	0.125	0.16	0.09	-0.15	-0.13	-0.325	0.53	0.24	-0.04	-0.245	-0.245	0.01	-0.165	-0.045	-0.08	0.275	0.16	0.085	-0.065	0	0.1	-0.13	-0.02	0.06	-0.155	-0.015	0.1	-0.185	0.04	0.12	0.06	0.075	0.345	-0.04
BRMS1L	NA	-0.02	0.67	0.19	0.09	0.21	-0.19	-0.12	-0.08	0.25	-0.34	0.11	1.22	-0.03	0.38	0.64	-0.13	0.1	0.47	0.19	0.75	-0.22	0.39	-0.11	NA	0.83	0.08	0.53	-0.22	0.36	-0.59	NA	0.85	0.29	0.41	0.17	0.4	-0.24	0.03	0.65	-0.03	0.17	-0.17	0.36	0.47	-0.27	0.99	0.63	0.45
BRP44	-0.1	-0.15	NA	0.04	0.04	-0.26	-0.16	-0.34	-0.25	0	-0.1	-0.37	-0.21	-0.11	-0.29	-0.5	0.01	-0.36	-0.34	-0.19	0.15	-0.82	-0.29	0.65	-0.37	0.05	-0.04	0.34	-0.15	-0.14	-0.01	-0.56	-0.25	-0.03	-0.03	-0.11	0.01	0.24	0.09	-0.28	-0.82	-0.13	-0.39	0.09	0.27	0.51	0.33	-0.44	-0.13
BRP44L	-0.22	0.01	0.07	-0.12	-0.07	0.02	-0.43	0.14	0	-0.18	-0.21	-0.15	-0.4	-0.27	0.17	-0.42	0.01	-0.29	-0.46	0.34	-0.57	0.08	-0.51	0.12	-0.62	-0.44	-0.24	-0.22	-0.1	-0.34	0.41	0.35	-0.19	-0.08	-0.16	-0.22	-0.06	0.36	-0.09	0.01	0.53	-0.19	-0.27	-0.1	0.13	-0.98	-0.35	-0.19	0.05
BRPF1	-0.15	0.2	0.07	-0.35	0.58	0.54	0.25	0.13	-0.07	0.11	0.03	0.56	-0.28	0.24	0.26	-0.28	0.24	0.06	0.22	-0.23	-0.14	-0.01	-0.33	0.2	-0.33	-0.45	0.16	0.35	0.06	0.14	0.49	-0.17	-0.01	-0.08	0.08	0.18	-0.37	0.26	0.31	-0.07	0.54	0.13	0.05	-0.14	0.07	-0.53	0.64	NA	0.16
BRPF3	-0.303333	-0.0666667	-0.23	-0.1	0.183333	-0.116667	-0.09	-0.143333	0.02	0.01	-0.176667	-0.24	-0.186667	0.0133333	-0.213333	0.21	0.0133333	-0.0766667	-0.176667	-0.326667	-0.1	-0.286667	-0.18	0.0266667	-0.103333	-0.18	-0.223333	-0.303333	-0.16	-0.213333	-0.153333	0.0166667	-0.26	-0.236667	0.0266667	-0.116667	-0.126667	-0.11	-0.0433333	-0.15	-0.12	-0.1	0.03	-0.253333	-0.233333	-0.01	-0.353333	-0.09	-0.266667
BRS3	0.8	0.06	0.07	0.14	0.38	0.36	0.65	0.24	-0.16	-0.09	0.13	0.3	-0.19	0.21	0.29	-0.12	0.19	0.04	-0.4	0.24	-0.47	0.05	-0.2	0.09	-0.41	-0.2	0.07	0.54	-0.36	0.06	0.1	0.5	0.19	-0.09	0.08	0.7	-0.22	-0.31	0.07	0.34	-0.2	0.12	0.17	NA	0.13	-0.18	-0.36	NA	0.4
BRSK2	-0.05	0.08	-0.01	0.1	-0.53	-0.03	-0.1	0.17	0.42	-0.3	-0.17	0	0.37	-0.1	-0.07	0.05	-0.13	0.02	0	-0.33	-0.05	0.27	0.26	0.24	-0.14	NA	0.22	-0.06	0.14	-0.05	0.1	-0.14	0.31	0.07	0.19	0.35	-0.08	0.15	0.29	-0.14	0.18	0	0.36	-0.18	-0.44	-1.12	-0.28	NA	NA
BRUNOL4	0.36	0.36	0.49	-0.08	-0.21	-0.35	0.14	0.11	0.36	0.17	0.09	0.08	-0.33	0.58	-0.05	-0.66	0.14	-0.21	-0.21	1.22	-0.4	0.34	-0.35	0.39	-0.26	-0.36	0.26	-0.14	0.08	0.05	0.15	-0.43	0.32	0.11	0.05	0.29	-0.04	0.48	0.05	0.3	-0.14	-0.25	0.4	0.18	-0.45	-0.89	NA	NA	0.72
BRUNOL5	0.35	0.08	0.52	0.02	-0.05	-0.145	0.205	0.445	0.06	0.105	0.15	0.145	-0.16	0.025	0.245	0.38	0.165	0.17	0.095	-0.105	0.21	0.035	-0.145	0.195	0.03	NA	0.18	0.215	-0.075	0.07	0.26	0.69	0.37	0.075	0.025	0.03	-0.015	0.065	0.135	0.275	0.37	0.255	0.415	0.105	0.275	-0.35	-0.815	-0.6	-0.06
BRWD1	0.18	0.07	0.4	0.1	0.15	0.32	0.3	0.53	0.2	-0.15	0.31	0.72	-0.33	0.21	0.37	-0.66	0.15	0.06	-0.31	0.4	-0.43	0.23	-0.12	0.3	-0.13	-0.15	0.32	0.2	0.08	0.11	0.18	0.57	0.48	0.11	0.02	0.21	-0.15	0.4	0.04	-0.01	-0.23	0.1	-0.04	0.01	0.63	-0.01	0.01	NA	0.03
BRWD2	-0.37	-0.16	0.14	0.24	0.18	-0.2	0.04	-0.05	-0.61	0.02	0.01	-0.23	0.16	-0.04	-0.08	-0.33	-0.19	0.14	-0.34	0.49	-0.53	0.03	0.29	0.39	-0.46	0.05	-0.14	0.18	NA	-0.3	0.1	-0.42	-0.03	-0.07	-0.26	NA	0	0.05	0.14	-0.43	0.14	-0.34	-0.61	NA	-0.53	-0.44	0.16	NA	0.25
BSCL2	-0.255	-0.125	0.105	0.125	-0.06	0.055	0.04	-0.045	-0.195	-0.015	-0.045	-0.075	0.11	0.04	0.125	-0.08	-0.23	-0.015	0.03	-0.3	0.17	-0.055	-0.08	0.005	0.275	0.135	0.02	0.1	-0.01	0.05	0.01	0.095	0.065	-0.02	0.035	-0.035	-0.05	0.26	-0.16	-0.105	0.38	-0.035	-0.125	-0.005	0.26	0	0.215	0.23	0.055
BSDC1	-0.27	-0.05	-0.14	-0.12	0.5	0.06	0.19	0.22	-0.22	NA	0.02	0.11	-0.05	-0.01	0.06	0.03	-0.08	0.04	-0.12	0.07	0.2	0.27	-0.04	-0.06	-0.03	0	0.1	0.02	-0.03	-0.04	-0.04	0.46	0.48	-0.03	-0.26	-0.15	-0.29	0.01	0.06	-0.31	-0.1	0.03	0.04	-0.09	0.01	-0.1	0.17	-0.38	-0.36
BSG	-0.08	0.16	0.21	-0.4	0.47	-0.47	0.12	0.15	0.52	0.5	-0.06	0	0.07	0.22	-0.21	0.3	0.29	-0.08	-0.21	0.78	-0.17	0.32	0.14	-0.32	-0.29	-0.48	0.32	0.57	0.29	0.02	-0.59	0.26	0	0.31	0.97	0.26	0.4	0.13	0.08	0.64	-0.02	-0.43	0.02	0.43	-0.79	NA	NA	0.58	NA
BSN	0.86	0.03	0.01	0.26	0.47	-0.04	-0.01	-0.28	-0.29	0.13	0.22	-0.01	0.38	-0.05	0.38	0.13	0.18	0.06	-0.11	-0.27	-0.1	0.11	0.06	-0.04	-0.22	-0.06	-0.02	0.1	-0.01	0.07	0	-0.39	0.11	0.04	-0.03	-0.12	-0.17	-0.2	0.05	-0.17	-0.19	0.08	-0.05	-0.2	0.54	0.22	0.13	-0.83	-0.17
BSPRY	-0.56	-0.06	-0.31	0.12	0.2	-0.63	0.37	0.24	-0.1	NA	0.16	-0.4	0.28	0.35	0.39	-0.02	0	0.12	0.09	-0.57	-0.11	0.23	0.02	0.37	0.12	-0.09	-0.09	-0.58	-0.2	-0.08	-1.01	-0.45	-0.77	-0.15	-0.01	0.44	-0.18	-0.2	-0.36	-0.06	-0.52	0.01	-0.09	0.23	-0.66	-0.29	-1.21	NA	-1.06
BST1	0.4	-0.04	0.36	0.18	0.44	0.08	-0.06	0.09	-0.55	-0.19	0.1	-0.06	-0.11	-0.12	-0.19	-0.79	-0.18	-0.04	0.06	0.42	0.57	-0.17	-0.13	0.01	0.54	0.09	-0.04	0.17	-0.06	-0.02	0.09	0.73	0.48	0.27	-0.06	-0.01	-0.28	0.14	-0.26	-0.09	0.19	0.07	0.26	0.18	0.78	-0.14	-0.25	-0.41	-0.02
BST2	-0.39	0.26	0.01	-0.18	-0.45	-0.12	0.3	-0.14	-0.26	-0.01	-0.14	-0.12	-0.01	-0.25	-0.19	0.54	-0.15	0.04	0.07	-0.27	-0.16	0.27	0.48	-0.42	-0.12	0.02	-0.01	0.02	0.13	-0.02	-0.16	-0.5	-0.35	0.01	-0.43	-0.07	0.06	-0.39	-0.15	-0.24	0.37	-0.03	-0.12	-0.01	-0.27	-0.42	-0.09	-0.13	0.09
BTAF1	-0.21	0.22	-0.56	-0.09	0.35	-0.57	0.04	-0.2	-0.19	0.01	0.09	0	-0.21	-0.53	-0.4	0.9	-0.5	-0.16	0.19	-0.54	0.14	0.06	0.25	-0.86	-0.04	0.11	-0.04	0.21	0.14	0.07	-0.29	-0.19	-0.13	0.12	-0.24	0.08	0.03	-0.2	-0.53	-0.28	-0.32	-0.08	0.03	0.06	-0.43	-0.63	0.52	-0.79	0.18
BTBD1	0.21	0.03	NA	0.39	-0.05	-0.17	0.27	0.51	0.2	0.04	0.18	0.34	-0.08	0.33	0.63	-1.23	0.08	0.06	0.06	0.78	-0.39	0.32	-0.18	-0.26	-0.47	-0.5	0.26	0.34	0.2	0.3	0.59	-0.11	0.17	0.18	0	0.13	-0.04	0.06	0.18	-0.07	0.52	0.06	0	0.22	0.51	0.44	1.02	NA	NA
BTBD10	0.32	0.09	0.29	0.09	0.34	0.14	0.19	-0.03	0.03	-0.11	0.1	0.12	0.55	-0.01	-0.14	-0.57	-0.02	0.08	0.15	0.15	0.08	0.54	0.44	0.13	0.23	0.44	0.05	0.09	-0.03	0.19	0.62	0.43	0.49	0.13	0.06	0.03	0.18	0.11	-0.07	-0.6	0.34	0.06	-0.24	0.35	0.43	0.45	-0.1	0.28	0.3
BTBD11	0.29	0.11	-0.16	-0.4	0.18	-0.17	0.11	-0.08	0.38	0.11	0.05	0.19	0	0.11	-0.25	0.54	0.39	-0.06	0.19	-0.11	-0.19	0.26	0.35	-0.02	-0.29	-0.11	0.04	-0.25	0.13	0.04	-0.1	-0.55	-0.22	-0.13	-0.17	-0.23	0.19	-0.02	0.01	0.01	-0.14	-0.04	0.01	-0.14	-0.7	0.08	0.18	0	0.34
BTBD12	0.1	-0.0566667	0.0166667	-0.176667	0.153333	-0.0366667	-0.276667	-0.233333	0.246667	-0.186667	-0.106667	0.03	0.173333	0.133333	-0.116667	0.00666667	0.296667	0.03	-0.113333	0.146667	-0.13	0.11	0.22	0.213333	-0.08	0.0566667	-0.216667	-0.35	-0.193333	-0.09	0.02	-0.08	-0.0566667	-0.0933333	0.21	-0.173333	-0.0633333	-0.196667	0.106667	-0.26	0.01	-0.04	0.03	-0.095	-0.343333	-0.0866667	-0.19	-0.163333	-0.113333
BTBD14B	0.13	0.07	0.05	-0.09	0.79	-0.45	0.02	0.19	-0.08	0.07	-0.21	0.14	-0.1	-0.13	0	0.59	0.06	0.07	0.1	-0.32	-0.02	-0.07	0.16	0.13	0.08	0.07	-0.03	-0.12	0.14	0.09	-0.37	-0.58	-0.11	-0.06	-0.07	0.09	-0.01	-0.39	-0.03	-0.05	0.27	-0.01	0.42	0.03	-0.47	0.05	0.16	0.01	-0.2
BTBD2	-0.43	0.13	0.26	0.18	1.12	-0.22	0.31	0.39	0.39	0.28	0.38	0.25	0.21	0.5	0.23	-0.42	0.5	0.3	0.11	1.28	-0.13	0.21	0.16	0.56	-0.28	0.27	0.37	0.32	0.15	-0.03	-0.45	0.14	0.24	0.19	0.24	0.35	0.14	0.32	0.38	0.41	0.32	0	0.1	0.06	0.58	0.16	0.07	NA	-0.15
BTBD3	0.41	-0.105	0.015	0.12	0.845	0.035	-0.35	0.12	0.12	-0.015	0.065	0.245	0.13	0.07	0.135	0.32	0.18	-0.01	0.145	-0.44	-0.18	0.29	-0.015	0.205	-0.215	0.085	-0.135	-0.335	0.27	0.03	-0.08	0.075	0.11	-0.07	0	-0.2	0	-0.1	-0.06	-0.34	0.125	-0.15	-0.025	0.04	0.055	0.075	-0.165	0.285	0.065
BTBD6	-0.15	-0.05	-0.05	0.06	-0.27	-0.065	-0.04	-0.105	0.21	-0.04	0.035	0.045	0.115	0.06	0.135	0.075	0.035	0.02	0.085	0.01	0.095	0.085	0.275	0.535	0.21	0.125	-0.01	-0.065	0.155	0.055	0.23	0.09	0.045	0.16	0.03	0.205	0.035	-0.06	0.07	0.07	0.305	0.155	0.14	-0.055	-0.085	-0.03	-0.025	-0.035	0.01
BTBD7	0	0.065	-0.28	-0.36	0.32	0.285	-0.1	-0.26	0	-0.115	0.215	0.145	0.285	0.12	0.14	-0.19	0.19	0.155	0.135	0.785	0.02	0.33	0.17	0.39	0.25	0.13	0.095	-0.23	-0.035	0.205	0.06	0.49	0.46	0.24	0.12	0.12	0	-0.195	0.185	-0.105	0.385	0.18	0.49	0.18	0.21	0.33	0.395	-0.09	-0.06
BTBD9	0.135	-0.175	0.155	-0.32	0.035	-0.23	-0.07	-0.135	0.16	-0.31	-0.445	0.125	0.57	0.07	0.185	0.175	0.185	0.08	0.08	0.13	0.16	0.315	0.255	0.095	0.29	0.415	-0.125	-0.39	-0.14	-0.005	0.26	0.26	0.105	0.03	0.355	-0.16	-0.005	-0.085	0.055	-0.06	-0.04	-0.09	0.245	-0.04	-0.005	0.03	0.16	0.93	-0.07
BTC	NA	0.21	NA	0.02	-0.2	0.24	-0.37	0.14	0.31	-0.21	-0.59	-0.14	-0.14	0.05	0.11	-0.58	-0.18	0.04	-0.26	-0.13	-0.12	-0.07	0.11	-0.32	-0.1	-0.55	0.01	-0.58	0.06	-0.52	-0.17	-0.2	0.14	0.32	-0.19	0.35	-0.07	0.96	-0.12	0.94	1.1	-0.17	-1.49	-0.34	NA	NA	NA	NA	NA
BTD	0.56	0.27	-0.02	-0.06	0.35	-0.05	0.29	0.2	-0.12	-0.01	0.1	-0.31	-0.55	0.28	0.29	-0.43	-0.25	-0.31	-0.31	0.36	-0.18	-0.28	-0.12	-0.26	-0.42	-0.5	0.13	0.45	-0.15	0.1	NA	-0.02	-0.24	-0.06	-0.07	0.26	-0.12	0.3	0.02	-0.04	-0.99	-0.19	-0.08	-0.02	0.2	0.03	0.1	-0.25	0.69
BTF3	NA	-0.08	-0.02	0.03	-0.31	-0.29	0.26	-0.2	-0.02	0.19	0.02	-0.19	0.31	-0.24	-0.08	0.13	-0.19	0.29	0.28	0.39	0.22	-0.17	0.06	-0.02	0.35	-0.09	-0.12	0.22	NA	0.3	0.21	0.31	0.01	0.09	0.13	0.1	0.25	0.07	0.04	-0.06	0.28	0.15	-0.02	-0.04	-0.33	-0.23	0.15	-0.04	-0.09
BTG1	0.35	0.12	0.16	0	1.2	0.36	1.07	-0.12	-0.28	0.71	-0.52	0.21	0.58	0.01	-0.03	-0.72	-0.64	0.4	0.64	-0.07	1.28	-0.74	0.3	-0.47	1.62	1.21	0.4	1.31	0.57	0.12	0.47	0.55	0.06	0.52	0.19	0.21	0.36	-0.2	-0.17	-0.08	0.02	0.03	-0.1	0.69	0.64	0.81	1.12	1.47	0.85
BTG2	-0.17	-0.09	-0.415	-0.295	-0.01	-0.55	0.06	0.03	-0.18	-0.125	-0.155	-0.39	-0.465	0.005	-0.195	-0.25	-0.035	-0.36	0.14	0.185	-0.215	-0.51	-0.185	-0.165	-0.13	-0.165	-0.245	-0.075	-0.105	-0.155	-0.415	0.025	-0.1	0.03	0.085	0.035	-0.045	-0.18	0.14	0.455	-0.32	-0.38	-0.09	0.12	-0.27	-0.085	-0.11	-0.375	-0.215
BTG3	-0.1	-0.345	0.305	0	-0.29	0.005	0.105	-0.185	-0.385	-0.005	-0.095	0.135	0.005	-0.3	-0.115	0.355	-0.56	0.015	-0.02	-0.63	0.14	-0.045	-0.015	-0.38	0.325	0.015	-0.07	0.345	0	-0.01	0.22	-0.335	0	0.105	-0.16	0.28	-0.075	-0.025	-0.425	-0.45	0.035	0.085	-0.09	0.63	0.205	0.08	0.1	-0.21	-0.33
BTG4	NA	0.28	0.21	0.21	-0.17	0.43	-0.29	0.19	0.5	0.29	0.16	NA	-0.34	0.18	-0.1	0.17	0.29	0.58	0.04	0.33	0.04	0.07	0.31	0.16	-0.33	0.12	NA	0.11	NA	NA	-0.71	0	0.27	0.86	0.4	0.1	-0.11	0.46	0.09	NA	-0.3	NA	-0.36	-0.28	NA	0.01	0.02	NA	NA
BTK	0.38	0.1	-0.13	0.16	-0.97	-0.51	0.37	0.64	-1.15	-0.14	0.27	-0.24	0.06	-0.5	-0.25	-0.37	-1.19	0.02	0.19	-0.13	0.82	-0.24	-0.57	-0.59	-0.19	0.09	-0.02	0.42	0.24	0.08	0.25	-0.55	-0.25	0.51	-0.69	-0.1	-0.08	0.22	-0.26	-0.05	0.2	0.7	-0.36	0.18	0.85	0.43	0.29	-0.72	-0.37
BTN1A1	-0.05	-0.13	0	-0.07	0.25	-0.14	0.31	0.11	0.02	NA	0.15	0.06	-0.17	0.35	0.18	0.25	0.17	0.01	-0.07	-0.22	0.25	-0.03	-0.13	-0.3	0.07	-0.07	0.36	0.38	0.03	-0.04	-0.17	0.39	0.19	0.25	0.16	0.04	-0.15	0.02	0.28	0.26	0.35	0.04	-0.22	0.28	0.13	0.27	0.78	0.73	-0.1
BTN2A1	-0.78	-0.04	1.39	-0.32	-0.09	0.25	-0.3	0.39	0.52	-0.47	-0.04	0.14	0.01	-0.06	0.14	-0.45	0.17	-0.04	-0.12	0.93	0.31	0.21	0.01	NA	0.05	0.31	-0.1	-0.78	-0.38	-0.48	-0.12	-0.12	0.16	-0.68	-0.02	-0.64	-0.1	0.44	0.15	0.03	0.38	-0.2	0.45	NA	0.88	-0.15	0.42	-0.79	-0.15
BTN2A2	-0.4	-0.21	-0.08	-0.1	0.04	-0.2	0.26	0.1	0.22	-0.06	-0.21	0.24	-0.53	0.35	0.93	-1.01	0.07	-0.11	0.65	-0.38	-0.15	-0.35	-0.22	0.24	-0.06	0.05	0.17	0.24	0.36	0.06	0.2	0.82	0.35	0.05	-0.03	0.21	-0.08	0.06	0.26	0.18	-0.34	-0.02	0.56	0.31	0.93	-0.27	NA	NA	0.18
BTN2A3	0.65	-0.89	-0.28	-0.03	0.04	0.19	-0.61	0.24	-0.5	-0.57	-0.45	-0.56	-0.4	-0.78	0.16	-0.35	-0.69	-0.64	-0.7	-0.11	-0.83	0.21	-0.4	0.02	-1.24	-0.75	-0.28	-0.77	-0.37	-0.66	0.2	0.53	0.58	-0.82	-1.47	-0.72	-0.66	0.12	-1.04	-1.46	0.03	-0.8	-0.02	-0.29	0.01	-0.39	-0.19	0.56	-0.24
BTN3A2	0.32	-0.15	0.4	0.43	-0.01	-0.81	0.12	-0.03	-0.39	0.39	-0.03	-0.56	-0.27	0.04	-0.48	-0.71	-0.53	-0.11	-0.42	0.06	-0.43	-0.28	-0.25	-0.19	-0.19	-0.53	-0.14	0.42	0.26	0.27	0.16	0.77	0.51	0.11	-0.23	-0.25	0.01	-1.21	0.05	0.07	0.68	-0.45	-0.05	-0.08	0.89	-0.21	0.2	-0.7	-0.3
BTN3A3	-0.52	0.42	-0.05	0.2	-0.29	-0.6	0.63	-0.04	-0.65	0.28	-0.41	-0.42	-0.95	-0.12	-0.14	-1.34	-0.85	0.07	-0.1	-0.03	0.19	-0.3	-0.52	-0.09	0.02	-0.35	0.48	0.89	0.36	0.66	0.36	0.93	0.98	0.55	-0.11	0.51	-0.26	0.36	0	-0.22	0.35	-0.24	-0.39	0.21	0.82	0.07	0.6	NA	0.27
BTNL2	-0.89	-0.16	NA	0.08	-0.12	-0.41	-0.08	-0.02	-0.17	0.31	0	-0.21	-0.33	0.09	0.09	-0.1	-0.02	-0.16	-0.11	0.44	-0.12	-0.47	-0.6	-0.02	-0.02	-0.22	-0.02	0.01	-0.1	-0.04	-0.28	-0.8	-0.06	-0.17	-0.11	-0.11	-0.13	0.2	0.39	0.14	-0.19	-0.15	0.4	-0.41	-0.72	-0.8	0.35	NA	-0.29
BTNL3	NA	-0.04	0.53	0.26	-0.49	-0.19	-0.1	0.04	0.28	0.12	0.28	-0.12	-0.68	-0.04	0.5	-0.26	0.25	0.01	-0.11	0.42	-0.5	0.15	NA	0.34	-0.33	-0.62	-0.03	-0.04	-0.03	-0.16	0.47	0.14	0.51	0.17	0.09	-0.07	-0.06	-0.07	0.06	-0.23	0.61	0.05	-0.1	0.01	0.01	0.02	0.05	NA	1.83
BTRC	0.05	-0.17	-0.155	0.015	-0.22	-0.255	-0.155	0.005	-0.05	0.025	-0.01	-0.18	-0.015	-0.22	0.025	0.17	-0.065	-0.15	-0.235	0.31	-0.205	0.025	0.125	0.09	-0.16	-0.3	-0.2	-0.205	0.03	-0.29	-0.14	-0.385	-0.03	-0.125	-0.025	-0.195	-0.095	-0.075	-0.04	0.045	-0.3	-0.17	0.28	-0.33	0.105	-0.305	-0.155	0.01	-0.11
BUB1	-0.55	-0.13	NA	-0.57	0.11	-0.02	0.53	NA	-0.59	0.08	0.21	0.05	-0.2	0.19	0.21	-0.66	-0.33	0.15	0	-0.4	0.53	-0.34	-0.09	-0.45	0.23	0.07	0.25	0.11	0.61	0.81	-0.53	NA	-0.54	0.39	-0.28	0.36	-0.19	-0.34	0.41	0.49	-0.42	0.61	0.19	-0.11	NA	0.9	1.22	NA	0.37
BUB1B	0	0.17	0.37	-0.05	0.03	-0.63	-0.07	0.15	-0.12	-0.26	0.1	0.25	-0.56	0.1	-0.21	0.53	0.18	-0.05	0.24	-0.19	-0.16	0.41	-0.4	0.07	-0.22	-0.28	-0.13	0.23	0.31	0.16	-0.07	-0.33	0.09	0.07	0.03	0.07	0.03	0.43	0.21	0.28	-0.25	0.22	1.48	-0.25	NA	-0.78	-0.34	0.7	0.14
BUB3	0.49	0.24	0.14	0.26	0.15	-0.04	0.23	0.34	-0.69	0.27	0	-0.21	-0.13	-0.31	-0.07	-0.28	-0.62	-0.1	0.13	0.34	0.3	-0.42	-0.43	-0.5	0.11	0.13	0.16	0.69	0.38	0.25	0.28	0.88	0.04	0.16	-0.46	0.26	0.19	0.56	-0.14	0.24	-0.07	0.08	-0.39	0.09	0.5	0.08	0.04	NA	NA
BUD13	-0.32	-0.08	-0.32	0.24	-0.41	0.03	-0.08	-0.02	-0.13	0.11	0.07	-0.13	-0.04	0.1	0.13	0.43	0.18	0.01	-0.07	0.04	0.13	-0.02	-0.13	-0.16	0.15	0.1	-0.21	0.06	-0.27	-0.18	0.2	0.16	-0.29	-0.35	0.04	-0.2	-0.15	0.18	0.12	0.06	-0.21	0	-0.34	-0.11	0.58	-0.14	-0.31	-0.67	-0.27
BUD31	0.22	-0.11	0.45	0.11	0.36	-0.28	-0.13	0.35	-0.84	0.28	0.11	0.1	-0.19	0.07	-0.06	-0.75	-0.24	-0.31	0.04	0.95	0.38	0.15	-0.97	0.18	0.06	-0.27	-0.1	0.57	-0.27	-0.27	0.33	0.68	0.29	0.16	-0.3	-0.41	0.18	0.02	0.09	0.01	-0.54	-0.05	-0.22	-0.09	1.04	0.53	-0.79	0.75	NA
BVES	NA	-0.02	NA	NA	-0.43	NA	NA	0.42	0.15	0.02	-0.11	0.25	-0.12	0.09	NA	-0.38	-0.2	0.15	0.13	0.2	0.13	-0.04	0.35	NA	0	0.16	NA	0.14	0	-0.05	1.14	NA	-0.77	0.26	0.06	0.4	0.12	0.78	0.1	0.3	0.55	0.07	0.87	0.38	NA	NA	NA	NA	-0.03
BXDC1	-0.26	0.235	0.335	0.115	-0.03	-0.085	0.03	-0.55	-0.08	-0.01	-0.1	-0.11	0.415	-0.155	-0.08	0	-0.3	-0.005	0.19	-0.02	0.26	0.025	0.215	-0.09	0.53	0.125	0.02	-0.19	-0.015	-0.18	-0.19	0.365	-0.02	-0.06	-0.1	-0.395	0.04	0.13	-0.16	0.025	-0.315	0.03	0.02	-0.01	1.05	-0.05	0.72	0.59	0.36
BXDC2	-0.8	0.3	NA	-0.41	0.43	-0.21	0.11	0.07	-0.26	-0.17	-0.07	-0.58	-0.47	-0.15	0.5	-0.5	-0.08	-0.13	0	0.14	-0.16	-0.28	0.01	-0.74	0.11	-0.26	-0.28	-0.12	-0.01	0.09	-0.45	-0.56	0.03	-0.3	-0.08	-0.19	0.55	-0.23	0.17	-0.23	-0.2	-0.26	0.32	0.08	NA	NA	-0.15	-0.59	-0.14
BXDC5	-0.5	-0.02	0.22	-0.07	0.66	0	0.04	0.02	-0.14	NA	-0.16	0.11	-0.22	-0.11	0.04	-0.84	0.21	0.2	-0.27	0.22	0.02	0	-0.23	0.22	-0.11	-0.36	0.33	0.5	0.05	0.33	0.43	0.98	0	0.2	0.09	0.2	0.12	0.87	0.02	-0.04	0.5	0.15	0.18	0.71	0.79	0.16	1.04	NA	0.19
BYSL	NA	-0.04	NA	1.2	NA	NA	-1.56	NA	0.01	0.4	0.41	-0.23	NA	0.2	NA	-1.09	-0.59	NA	-0.67	-0.49	0.43	NA	-0.37	NA	-0.07	-0.54	NA	-0.32	NA	-0.61	NA	NA	0.3	-0.13	0.05	0.67	0.5	0.02	-0.01	0.95	NA	NA	0.97	0.15	NA	-0.1	0.5	0.48	0.27
BZRAP1	0.14	-0.08	-0.13	-0.08	0.27	0	-0.07	0.2	0.18	-0.11	0.18	0.1	-0.44	0.02	-0.12	0.45	0.18	-0.33	0.02	0.1	-0.54	0.17	-0.45	0.1	-0.44	-0.21	-0.2	-0.24	0.01	-0.02	-0.26	-0.05	-0.36	-0.35	-0.06	-0.33	0.01	-0.28	-0.05	-0.13	0	-0.22	-0.07	0.29	-0.54	-0.58	-0.3	0.15	-0.27
BZRPL1	0.12	-0.88	-0.43	-0.61	-0.79	-0.46	-1.35	-0.44	-0.76	-0.86	-0.73	-0.36	0.03	-0.78	-0.19	0.69	-0.86	-0.84	-0.26	-0.77	-0.65	-0.39	-0.05	-0.37	-0.99	-0.4	-0.66	-1.18	-0.17	-0.6	-0.8	-0.27	-0.22	-1.09	-1.22	-0.93	-0.52	-0.89	-1.04	-1.44	-0.93	-1.03	-0.36	-0.45	-0.53	-0.84	-0.26	0.63	-0.5
BZW1	-0.17	0.14	0.08	0.635	-0.01	-0.22	0.27	0.62	-0.295	0.125	-0.445	-0.22	-0.735	-0.14	0.26	-0.795	-0.31	-0.26	0.28	0.11	0.335	-0.81	-0.42	0.05	0.265	-0.19	0.345	0.66	-0.17	0.14	-0.235	0.1	0.3	-0.015	0.22	0.145	-0.16	-0.005	-0.02	0.32	0.325	-0.44	0.225	-0.02	0.975	0.14	0.13	-0.49	0.36
BZW2	0.345	0.03	0.19	0.155	0.24	-0.08	-0.025	0.09	0.115	-0.02	0.05	0.08	0.065	-0.055	0.065	0.4	0.035	-0.01	-0.165	0.05	-0.405	0.055	0.015	-0.07	-0.49	-0.09	-0.095	-0.35	-0.215	0.045	-0.265	-0.12	-0.195	-0.085	-0.06	-0.02	0.025	-0.035	-0.095	-0.37	0.15	-0.08	-0.025	-0.105	-0.405	-0.08	-0.205	-0.34	-0.155
C10orf10	-0.3	-0.1	-0.05	-0.37	-0.67	0.08	-0.12	-0.15	-0.05	0.07	-0.14	-0.21	0.13	0.11	-0.16	0.36	0.28	0	-0.03	-0.59	-0.16	-0.43	-0.25	-0.31	-0.03	-0.39	-0.15	-0.43	0	-0.13	0.03	-0.38	-0.26	0.06	-0.04	0.03	-0.1	0.1	0.31	0.54	-0.15	-0.03	-0.3	-0.11	-0.53	-1.48	-0.63	NA	-0.9
C10orf11	-0.42	0.34	0.56	0.25	0.32	0.61	0.35	-0.38	-0.27	-0.21	-0.12	0.1	-0.23	-0.2	-0.04	0.26	-0.39	NA	-0.12	-1.34	0.09	0.13	0.35	0.17	0.11	-0.11	0.04	0.06	0.12	-0.01	0.09	0.23	0.07	-0.4	-0.02	0.09	0.12	0.18	0.16	-0.31	0.03	0.14	-0.08	0.02	NA	NA	-0.14	-0.72	-0.32
C10orf110	0.28	0.33	-0.19	-0.07	0.41	0.44	0.05	0.2	0.47	-0.19	0.35	0.46	0.54	0.23	0	0.1	0.48	0.3	0.08	0.41	-0.01	0.47	0.49	0.41	0.15	0.31	0.03	-0.37	0.02	0.08	0.05	0.13	0.05	-0.01	0.22	-0.27	0.12	-0.07	0.14	0.07	-0.17	0.2	-0.14	0	-0.01	-0.07	0.24	0.15	0.69
C10orf112	0.15	0.115	0.03	-0.135	-0.435	-0.015	0.085	-0.145	0.145	0.06	-0.25	0.05	0.24	0.01	0.315	0.36	0.19	0.005	0.07	-0.15	-0.1	-0.05	-0.165	0.125	-0.045	0	-0.045	-0.03	0.18	0.04	-0.07	0.025	-0.11	0.07	0.03	0.26	0.21	-0.48	0.055	0.25	-0.26	0.065	0.155	0.12	-0.225	0.12	-0.465	-0.35	0.125
C10orf116	0.26	0.11	0	0.18	-0.125	-0.205	-0.21	0.38	-0.2	0.24	-0.135	0.025	0.45	0.16	-0.14	0.295	-0.185	0.2	0.18	0.03	-0.04	0.02	0.075	0.92	-0.03	-0.115	0.235	-0.14	-0.065	0.11	-0.04	0	-0.465	0.155	0.135	0.205	0.01	-0.105	0.045	0.11	-0.19	0.15	0.34	0	-0.315	-0.34	-0.25	-0.17	0.44
C10orf118	-0.15	-0.1	0.09	-0.13	0.2	0.105	0.505	0.105	0.095	0.21	0.155	0.52	0.04	-0.035	0.495	-0.42	-0.2	-0.065	0.12	0.22	0.285	-0.35	-0.03	-0.64	0.34	-0.34	-0.15	0.11	-0.195	-0.085	-0.08	-0.36	-0.2	-0.525	0.015	-0.095	-0.13	0.225	-0.315	0.24	0.605	-0.03	-0.13	-0.2	0.37	0.41	0.5	-0.04	-0.23
C10orf119	-0.57	-0.04	0.41	-0.02	-0.495	-0.245	0.17	-0.51	-0.24	0.26	-0.14	-0.155	-0.66	-0.135	-0.37	0.175	-0.245	-0.005	-0.1	-0.325	-0.125	-0.15	-0.655	0.085	0.09	-0.13	-0.045	0.265	0.02	0.14	-0.265	-0.445	-0.195	0.005	-0.23	0.06	0.035	-0.43	-0.215	-0.165	0.22	-0.01	0.18	0.175	0.21	-0.06	0.17	-0.92	0.14
C10orf12	-0.18	-0.05	NA	0.15	0.51	0.1	0	0.24	0.35	-0.17	-0.22	-0.03	-0.38	0.12	0.42	-1.05	0.11	0.08	-0.39	0.18	-0.59	0.18	-0.31	-0.01	-0.41	-0.35	0.01	0.18	-0.11	-0.12	0.21	0.2	0.39	0.17	0.13	0.13	-0.11	-0.06	0.42	0.19	0.59	0.04	0.88	0.31	0.15	0.99	-0.07	NA	0.37
C10orf137	-0.286667	-0.433333	-0.136667	-0.0266667	-0.33	-0.223333	-0.37	-0.316667	-0.38	-0.336667	-0.326667	-0.106667	-0.44	-0.256667	-0.32	0.46	-0.296667	-0.406667	-0.186667	-0.693333	-0.186667	-0.486667	-0.346667	-0.45	-0.226667	-0.28	-0.346667	-0.316667	-0.286667	-0.353333	0.143333	-0.31	-0.243333	-0.176667	-0.286667	-0.15	-0.16	-0.246667	-0.23	0.03	-0.356667	-0.323333	-0.18	-0.223333	-0.15	-0.26	-0.296667	-0.18	-0.266667
C10orf18	-0.32	0.11	0.03	0.07	-0.2	0.5	-0.06	0.1	0.34	0.08	-0.04	0.115	-0.04	-0.125	0.03	-0.14	-0.06	0.145	0.175	0.11	-0.48	-0.26	0.05	0.29	0.05	-0.28	0.06	-0.12	0.255	0.215	0.085	-0.3	0.17	-0.165	0.16	0.08	0.005	-0.32	0.095	-0.175	-0.37	0	-0.04	0.11	-0.33	0.06	-0.29	-0.22	0.19
C10orf22	0.11	0.22	0.36	0	-0.23	0.1	0.19	0.08	1.15	-0.06	0	0.55	0.6	0.49	-0.04	-0.1	0.98	0.35	0.02	0.39	-0.34	0.49	0.49	0.24	-0.22	0.17	0.15	-0.52	0.01	0.2	-0.08	-0.35	-0.24	-0.09	0.59	-0.22	0.19	-0.44	0.72	0.1	-0.02	0.13	0.53	-0.05	-1.11	0.24	-0.2	-0.08	-0.18
C10orf26	0.035	-0.435	-0.13	0.01	0.155	-0.305	-0.265	0.015	-0.415	-0.325	-0.32	-0.35	-0.735	-0.405	-0.035	0.58	-0.335	-0.615	-0.34	-0.31	-0.59	-0.28	-0.435	-0.4	-0.685	-0.615	-0.235	-0.105	-0.355	-0.43	-0.06	-0.36	-0.08	-0.28	-0.68	-0.245	-0.36	-0.265	-0.495	-0.215	0.055	-0.345	-0.24	-0.155	-0.175	-0.11	0.05	-0.35	-0.365
C10orf28	-0.145	0.035	-0.32	-0.07	-0.395	-0.015	-0.09	-0.04	-0.105	-0.17	-0.23	0.015	0.055	-0.145	-0.2	0.76	-0.005	0.02	-0.06	-0.135	-0.245	0.16	0.065	0.035	-0.23	-0.175	-0.145	-0.34	-0.065	-0.12	-0.385	-0.335	-0.19	-0.09	-0.18	-0.01	-0.01	-0.44	-0.055	-0.265	-0.205	-0.08	-0.1	-0.07	-0.36	-0.075	-0.21	-0.045	-0.25
C10orf33	-0.15	-0.08	-0.47	-0.06	-0.4	-0.13	-0.11	0.06	-0.12	0.06	-0.16	-0.22	-0.14	-0.09	-0.04	-0.02	-0.29	-0.14	-0.03	-0.34	0.07	-0.06	-0.22	-0.73	0.07	-0.14	-0.1	-0.07	-0.16	-0.18	-0.08	-0.35	-0.13	-0.05	0.13	0	-0.08	-0.07	-0.09	-0.11	-0.07	0	0.16	-0.26	0.31	-0.3	-0.21	-0.35	-0.4
C10orf38	0.1	-0.24	-0.39	-0.13	-0.52	-0.85	-0.43	-0.17	-0.22	-0.02	-0.06	-0.66	0.19	0.08	-0.08	-0.16	0.06	0.01	0.03	-0.34	-0.04	-0.49	-0.42	-0.5	0.83	0.23	-0.23	-0.42	-0.22	-0.21	-0.1	-0.02	-0.23	-0.36	0.21	-0.12	0.1	0.47	0.04	0.36	0.16	0.01	0.24	-0.49	0.3	-0.36	0.59	NA	NA
C10orf39	0.63	0.4	0.11	-0.1	0.09	0.01	0.4	-0.33	0.35	-0.02	-0.08	0.27	0.27	0.04	-0.01	0.36	0.08	0.15	0.35	-0.14	0.16	0.16	0.4	-0.09	-0.16	0.2	-0.03	0.1	0.31	0.19	0.09	0.13	0.31	0.2	-0.09	0.34	0.43	0.13	0.07	0.1	-0.16	0.16	-0.48	0.27	-0.97	0.09	0.11	0.1	0.35
C10orf4	0.14	0.06	0.63	0.08	-0.62	-0.58	0.38	-0.25	-0.99	0.46	0.17	-0.1	-0.05	-0.6	-0.09	0	-0.99	0.33	0.01	0.38	0.46	-0.23	-0.8	-0.63	0.58	NA	0.58	0.44	0.41	-0.01	0.03	0.06	0.05	0.36	-0.28	0.77	0.37	0.16	-0.26	-0.1	0.39	0.83	-0.59	0.61	0.63	-0.58	0.16	NA	NA
C10orf54	0.04	0.09	0.05	0.005	0.225	-0.085	0.17	-0.135	0.04	-0.02	0.035	-0.105	0.395	0.105	0.065	-0.285	0.055	-0.075	0.445	0.105	0.375	-0.07	0.055	0.01	0.49	0.315	0.025	0.395	0.045	0.2	0.645	0.19	-0.12	0.25	0.475	0	0.185	0.01	-0.105	-0.08	0.06	0.03	-0.025	-0.01	0.125	0.17	0.12	0.19	0.485
C10orf57	NA	0.55	0.06	1.29	0.57	NA	NA	NA	0.06	0.1	0.25	-0.19	-0.62	0.95	0.41	-0.89	0.13	-0.07	0.44	0.06	0.4	-0.09	0.25	0.41	0.28	0.05	NA	0.96	0.07	-0.18	0.97	NA	0.67	0.15	0.32	0.86	0.3	0.71	0.6	0.63	-0.98	-0.64	-0.92	0.3	-0.41	NA	NA	NA	0.68
C10orf58	-0.26	0.13	0.71	0.19	0.44	0.39	0.2	0.42	0.48	-0.17	0.13	0.21	0.6	0.34	0.19	-0.71	0.41	0.25	0.05	0.59	0.45	0.16	0.71	0.6	0.23	0.24	0.16	0.18	0.04	0.17	0.65	0.18	0.64	0.26	0.29	0.02	0.16	0.11	0.14	0.24	0.1	-0.01	0.03	0.01	-0.16	-0.01	0.35	0.71	0.08
C10orf59	NA	0.15	NA	0.32	-0.83	0.49	0.14	NA	-0.24	-0.22	-0.06	-0.19	NA	0.16	-0.38	0.2	-0.27	0.14	0.02	-1.31	0.27	-0.33	NA	0.07	0.07	-0.29	0.09	0.39	-0.06	0.07	0.17	0.49	-0.15	0.19	0.19	0.21	0.05	0.38	0.08	0.46	-0.12	0.13	0.7	-0.07	0.54	-0.06	0.6	NA	0.21
C10orf6	1.11	0.27	-0.32	0.38	0.3	0.24	0.13	-0.69	0.33	0.14	0.2	0.13	-0.24	0.33	0.37	-0.05	0.17	0.09	-0.11	0.12	0.13	0.1	0.24	-0.03	0.06	-0.04	0.03	0.32	0.03	0.08	0.05	0.4	0.01	0.1	0.07	-0.12	-0.06	0.37	0.34	0.25	0.08	0.15	0.04	0.17	0.36	-0.14	0.04	NA	0.15
C10orf61	0.63	-0.43	-0.17	-0.13	-0.21	-0.48	-0.27	-0.33	-0.44	-0.1	-0.54	-0.46	-0.25	-0.45	-0.45	0.27	-0.57	-0.36	-0.23	-0.71	-0.07	-0.51	-0.15	-0.19	-0.14	-0.35	-0.25	0.04	-0.14	-0.14	-0.2	-0.39	-0.4	-0.09	-0.51	-0.21	-0.31	-0.28	-0.53	-0.15	-0.16	-0.28	-0.31	-0.33	0.11	-0.12	-0.05	-0.13	-0.31
C10orf62	-0.67	-0.02	0.52	NA	0	-0.64	-0.36	NA	-0.01	0.02	-0.26	-0.41	-0.12	0.05	NA	-0.25	-0.27	-0.17	0.34	0.04	0.02	0.02	-0.01	-0.28	-0.12	0.21	-0.24	-0.05	0.03	-0.37	-0.83	-0.53	-0.1	-0.25	0.07	0.24	-0.19	-0.2	-0.03	0.53	0.34	-0.18	-0.37	0.3	0.45	NA	NA	0.87	NA
C10orf65	-0.41	0.03	-0.3	0.23	0.63	0.24	0.01	-0.09	0.75	0.01	0.35	0.35	-0.09	0.13	0.09	-0.38	0.22	0.16	-0.18	0.55	-0.07	0.4	0.33	0.45	-0.12	-0.02	0.08	-0.47	0.16	-0.03	0.18	-0.17	0.5	-0.17	0.01	-0.12	0.05	0.53	0.19	-0.14	0.23	0.12	0.04	-0.26	-0.34	0.06	0	0.26	0.33
C10orf68	-0.08	-0.2	0.17	-0.23	-0.24	-0.2	0.2	0.02	-0.45	0.24	-0.13	-0.52	-1.01	-0.06	0.02	-0.57	-0.53	-0.26	-0.38	0.34	-0.1	-0.45	-0.51	-0.22	-0.35	-0.45	-0.03	0.23	-0.32	-0.55	-0.16	-0.14	0.08	-0.3	-0.41	0.13	-0.19	0.09	-0.26	-0.15	0.21	-0.18	0.02	-0.08	0.21	-0.89	-0.27	0.06	0.19
C10orf71	0.36	0.04	0.09	0.23	0.23	0.15	-0.03	0.23	0	0.05	-0.06	0.09	0.85	0.1	0.12	0.28	0.22	0.26	0.21	0.64	0.24	0.01	0.34	0.1	0.22	0.41	-0.03	-0.01	0.11	0.18	0	0.05	0.4	0.16	0.21	0.07	0.03	0.05	0.04	0.08	0.14	0.12	-0.3	-0.02	0.08	0.12	0.37	-0.17	0.83
C10orf76	-0.05	0.02	NA	0.19	0.25	0.46	0.24	-0.11	-0.01	0.29	0.1	-0.11	-0.49	0.07	NA	-1.22	0.05	-0.15	-0.29	0.18	-0.38	-0.04	-0.11	-0.37	-0.34	-0.11	0.2	0.41	0.02	0.05	-0.54	0.77	0.13	0.18	0	0.42	-0.17	-0.3	0.16	0.39	0.18	-0.03	0.79	0.03	-0.3	-0.31	0.95	NA	-0.63
C10orf79	-0.09	0	-0.16	-0.095	-0.04	-0.38	-0.8	-0.03	-0.31	-0.45	-0.17	-0.065	-0.435	-0.28	0.38	0.02	-0.2	-0.265	-0.115	-0.34	-0.29	-0.145	-0.085	-0.17	-0.78	-0.375	-0.3	-0.3	-0.045	-0.285	0.365	-0.1	0.485	-0.295	-0.495	-0.155	-0.28	-0.26	-0.265	-0.61	-0.26	-0.2	-0.28	0.04	-0.31	0.385	-0.47	0.01	-0.33
C10orf80	0.73	-0.15	0	0.15	-0.08	-0.54	0	-0.19	-0.25	-0.11	-0.17	0.03	0	-0.24	0.09	0.11	-0.14	0	0.07	-0.11	0.21	0.36	-0.14	-0.2	0.02	-0.17	0	-0.06	-0.03	0.06	0.01	-0.1	0.14	-0.07	-0.08	-0.03	-0.39	0.22	-0.2	0.1	-0.65	-0.05	-0.35	-0.01	0.12	0.5	0.25	0.04	0.23
C10orf81	0.47	-0.11	0.1	0.095	0.09	-0.07	-0.085	-0.14	-0.205	-0.07	0.025	-0.08	0.215	-0.185	-0.14	-0.04	-0.135	0.02	0.13	0.235	-0.065	-0.135	-0.155	-0.05	0.14	0.035	0.005	0.175	0.025	0.115	-0.14	0.18	-0.175	-0.045	-0.125	-0.05	-0.05	0.04	-0.075	-0.07	0.18	0.035	-0.14	-0.18	-0.03	0.155	-0.375	0.29	0.05
C10orf84	-0.4	-0.23	-0.1	0.17	-0.16	-0.24	-0.16	0.26	-0.35	-0.21	-0.23	-0.14	0.36	-0.14	-0.24	0.08	-0.23	-0.25	-0.2	-0.47	0.51	0.04	-0.1	-0.29	0.09	-0.13	-0.2	0.27	-0.07	-0.37	-0.25	0.11	-0.13	0	-0.02	-0.14	-0.13	0.04	-0.42	-0.18	0.41	0.17	0.35	NA	-0.28	0.73	0.64	NA	-0.3
C10orf88	0.3	-0.04	-0.06	-0.05	-0.075	0.005	-0.225	-0.04	0.05	0.005	-0.095	-0.09	-0.165	-0.04	-0.25	0.35	0.005	0.09	-0.175	0.025	-0.37	-0.325	-0.01	-0.015	-0.59	-0.135	-0.31	-0.51	-0.14	-0.14	-0.295	-0.25	-0.23	-0.415	0.105	-0.335	0.07	-0.04	-0.1	-0.145	-0.045	-0.195	-0.51	-0.27	-0.5	-0.455	-0.41	-0.08	-0.135
C10orf92	-0.01	0.23	-0.1	0.36	0.17	0.22	0.05	0	-0.09	-0.2	0.18	0.26	0.28	0.19	-0.2	-0.4	0.35	0.3	0.27	0.06	0.17	0.76	0.04	0	0.23	0.39	0.05	0.41	0.19	0.09	0.58	0.65	0.32	0.35	0.2	0.18	0.07	0.38	0.11	-0.06	0.02	0.23	0.71	0.04	0.16	0.06	-0.25	NA	0.61
C10orf95	-0.16	-0.16	-0.2	0.03	-0.43	0.15	-0.63	-0.09	0.12	-0.45	-0.23	-0.43	-0.04	-0.42	0.1	-0.16	-0.2	-0.43	-0.43	0.4	-0.63	0.7	0.16	0.85	-0.55	-0.17	-0.59	-0.75	-0.48	-0.6	0.13	0.21	0.23	-0.35	-0.44	-0.4	-0.54	0	-0.5	-0.65	-0.44	-0.5	0.04	-0.62	-0.32	-0.25	-0.2	-0.11	-0.15
C10orf97	0.12	0.14	-0.03	0.29	0.2	0.25	0.11	0.29	-0.29	0.04	0.06	-0.08	0.25	0.01	0.32	-1.13	-0.2	-0.12	0.16	0.49	0.24	-0.16	0.3	0.3	0.12	0	0.12	0.41	0.06	0.11	0.31	-0.01	0.52	0.15	0.04	-0.1	-0.03	0.78	-0.07	-0.04	0.25	-0.01	-0.11	-0.11	0.72	0.38	-0.1	0.48	0.24
C11orf1	0.05	-0.01	-0.1	0.31	0.43	0.63	0.33	0.34	0.32	0.23	0.13	0.1	0.15	0.43	0.31	-0.71	0.46	0.25	-0.23	0.09	-0.15	0.19	-0.3	-0.02	-0.04	-0.08	0.33	0.38	0.1	0.12	0.8	0.73	-0.23	-0.04	0.28	0.12	0.06	0.57	0.35	0.25	0.31	0.29	-0.38	-0.06	1.44	-0.61	-0.09	-0.64	0.2
C11orf10	1.06	0.1	0.65	0.16	-0.47	0.48	0.05	0.3	-0.42	0.34	0.03	-0.3	-0.28	-0.2	0.15	-0.68	-0.34	-0.25	-0.21	0.53	1.02	-0.12	-0.81	0.17	-0.06	-0.18	-0.36	0.45	-0.1	0.15	0.02	0.23	0.35	0.01	-0.44	-0.07	0.24	0.84	-0.16	0.43	-0.27	0.05	-0.03	0.13	0.6	0.88	0.88	0.48	0.61
C11orf16	NA	0.24	NA	-0.25	0.48	0.51	0.43	0.04	0.04	0.21	-0.02	0.41	-0.22	0.06	NA	-0.24	0.22	0.11	-0.18	1.02	0.1	0.26	-0.26	1.11	0.08	-0.1	0.01	0.45	0.14	-0.25	-0.08	NA	0.32	0.54	0.1	0.03	-0.09	0.01	0.2	0.89	0.23	NA	-0.6	0.45	0.72	1.12	NA	NA	NA
C11orf17	-0.13	0.04	-0.01	0.01	-0.09	-0.005	0	-0.205	0.205	0.03	-0.075	-0.08	-0.14	0.215	-0.05	0.245	0.15	-0.125	-0.11	0.01	-0.165	0.015	-0.165	-0.05	-0.155	-0.095	0.01	0.03	-0.14	0.04	-0.24	-0.17	0.02	-0.07	-0.085	0.035	-0.035	-0.1	0.045	-0.09	-0.02	-0.035	0.04	-0.01	-0.245	-0.485	-0.175	0.015	-0.255
C11orf2	0.13	0.18	-0.1	-0.31	0.16	-0.51	0.25	-0.36	0.08	0.06	0.23	0.08	-0.15	0.08	-0.13	-0.29	0.12	0.13	-0.29	0.58	-0.16	-0.46	-0.14	-0.28	-0.27	-0.01	0.2	-0.01	-0.32	-0.07	0.19	0.26	0.15	-0.02	-0.16	0.16	-0.07	0.19	-0.01	-0.22	0.38	0.04	-0.12	-0.07	0.4	-0.68	-0.16	0.13	-0.32
C11orf21	-0.29	-0.18	0.05	-0.03	0.01	0.01	-0.1	-0.18	0.17	-0.24	-0.12	-0.01	0.01	-0.18	-0.08	0.19	0.26	-0.06	-0.49	0.14	-0.82	0.15	-0.1	0.35	-0.76	-0.32	-0.18	-0.92	-0.21	-0.31	-0.13	-0.05	-0.36	-0.3	-0.5	-0.35	-0.33	-0.43	-0.23	-0.68	-0.11	-0.14	0.08	-0.25	-0.21	-0.5	-0.52	-0.49	-0.18
C11orf24	0.18	0.07	NA	0.2	-0.31	-0.16	0.38	0.14	-0.09	0.39	0.17	-0.05	-0.39	-0.01	0.35	-0.47	-0.31	0.07	-0.56	0.61	-0.14	-0.04	-0.47	-0.09	-0.29	-0.18	0.21	0.43	-0.02	-0.22	0.31	0.18	0.5	0.39	0.05	0.15	-0.3	-0.01	0.06	0.04	0.43	0.35	0.23	0.08	0.44	0.57	0.33	NA	0.1
C11orf30	-0.16	0.07	-0.21	0.15	0.5	0.4	0.24	0.03	0.03	0.11	0.08	0.04	0.12	0.01	0.16	0.01	0.05	0.26	0.01	0.19	-0.12	0.57	0.06	0.37	-0.17	0.03	0.11	0.18	-0.02	-0.01	0.33	0.36	0.18	0.09	0	0.28	0.05	0.25	-0.09	-0.07	-0.14	0.2	0.21	-0.16	0.02	-0.04	0.23	0.07	-0.11
C11orf41	1.05	-0.26	0.03	-0.04	1.23	-0.12	0.14	0.04	0.2	0.07	0.19	-0.26	-0.15	-0.07	0.04	0.42	-0.13	-0.04	-0.33	-0.49	-0.56	-0.16	-0.35	-0.7	-0.62	-0.41	0.16	0.06	-0.34	-0.26	-0.05	-0.55	-0.38	-0.28	-0.05	-0.1	-0.34	-0.34	-0.12	0.02	0.52	-0.19	-0.08	-0.36	0.14	-0.2	-0.65	-0.23	-0.34
C11orf46	0.24	-0.25	-0.04	-0.18	0	-0.32	-0.18	-0.34	-0.3	-0.06	-0.23	-0.26	-0.16	-0.22	0.08	0.27	-0.27	-0.27	0.04	-0.32	0.04	-0.65	-0.2	-0.19	-0.15	-0.09	-0.11	-0.11	-0.07	-0.32	-0.28	-0.18	-0.25	-0.31	-0.13	-0.23	0.14	-0.28	0.01	-0.05	0.07	-0.3	-0.24	-0.11	-0.08	-0.11	-0.12	0.07	-0.06
C11orf48	-0.32	0.24	0.42	0.1	0.26	-0.14	0.38	-0.02	-0.09	0.14	0.25	0.02	-0.23	0.19	-0.52	-0.73	0.09	0.06	-0.24	0.33	0.03	0.57	-0.32	0.08	-0.05	0	0.24	0.63	0	0.13	0.43	0.7	0.32	0.1	0.08	0.12	-0.05	0.54	0.11	0.13	0.98	0.16	-0.06	0.19	0.61	0.23	0.48	0.64	0.18
C11orf49	0.335	0.08	0.19	0.055	0.065	0.365	0.22	0.065	0.145	0	0.125	0.095	0.455	0.11	0.29	-0.03	0.14	0.115	0.065	0.01	0.165	0.605	0.195	0.195	0.055	0.175	0.03	-0.205	0.075	-0.02	0.375	0.305	0.12	0.015	0.08	0.035	-0.06	0.485	-0.095	-0.07	0.095	-0.005	0.04	-0.01	0.49	-0.145	0.235	-0.07	-0.02
C11orf51	-0.32	0.02	0.26	-0.07	0.08	0.11	0.27	-0.03	0.08	0	0.19	0.13	0.08	0.02	-0.13	0.22	0.15	0.14	0.13	-0.35	0.04	0.03	0.1	-0.04	-0.11	0.05	0.16	0.16	0.08	0.16	-0.14	-0.11	-0.31	0.04	-0.07	0.23	-0.12	-0.14	-0.04	-0.17	0.12	0.08	-0.09	0.04	-0.19	0.14	0.37	-0.05	-0.38
C11orf52	0.22	-0.03	-0.22	0.09	-0.36	0.01	-0.17	-0.14	0.29	0.11	-0.03	0.05	-0.37	-0.06	-0.12	0.21	0.12	0.11	-0.44	-0.17	-0.41	-0.07	-0.31	0.22	-0.35	-0.35	-0.2	-0.24	0.22	0.14	0.14	-0.17	-0.1	0.02	0.3	0.02	0.01	-0.07	0.06	0.1	-0.26	0.15	-0.05	-0.2	-0.27	0.09	0.01	0.22	0.35
C11orf53	-0.58	0	-0.5	-0.19	-0.14	0.05	-0.13	-0.21	0.4	-0.02	-0.01	0.08	-0.15	-0.08	-0.27	0.78	0.31	0.12	-0.32	-0.09	-0.56	0.12	0.03	0.38	-0.66	-0.39	-0.26	-0.75	0.04	-0.2	-0.33	-0.63	-0.24	-0.29	0.01	-0.23	-0.23	-0.33	-0.06	-0.03	-0.08	-0.11	0.15	-0.33	-1.01	-0.22	-0.23	-0.35	0.07
C11orf54	-0.2	-0.125	0.38	0.33	0.19	-0.37	-0.02	0.35	-0.105	-0.01	0.095	0.01	-0.57	-0.015	0.19	0.1	0.105	-0.105	-0.355	0.1	-0.1	-0.03	-0.46	-0.845	-0.24	-0.645	-0.155	0.25	-0.11	0.02	0.12	0.18	-0.3	-0.3	-0.14	0.26	0.175	0.11	0.13	0.59	0.56	-0.16	0.29	0.225	0.5	0.32	0.79	0.92	0.535
C11orf56	0.87	-0.04	-0.14	-0.13	0.43	-0.25	-0.02	0.08	-0.22	-0.24	-0.05	0.03	0.27	-0.2	-0.09	0.43	0.01	-0.06	0.03	-0.38	-0.23	-0.01	0.4	-0.34	-0.25	-0.02	-0.03	-0.15	0.03	-0.17	-0.26	0.29	-0.29	-0.19	-0.24	0.01	-0.06	-0.31	-0.09	-0.44	-0.1	-0.15	0.18	-0.1	-0.49	-0.25	-0.19	-0.24	-0.13
C11orf57	-0.425	-0.075	-0.265	0.18	-0.28	-0.035	-0.015	0.08	-0.37	-0.14	0.025	0.06	-0.2	-0.29	-0.03	-0.425	-0.395	-0.175	-0.045	0.1	0.405	-0.065	-0.085	-0.145	0.1	0.04	0.05	0.235	0.025	-0.14	0.205	0.01	0.05	-0.02	-0.275	-0.05	-0.07	0.205	-0.185	-0.305	-0.13	-0.035	-0.32	0.195	0.355	-0.48	0.245	-0.275	-0.105
C11orf58	-0.43	0.31	0.38	0.33	-0.48	0.14	-0.04	0.42	-0.09	-0.13	0.12	0.11	0.35	-0.19	-0.02	-0.54	-0.14	0.04	0.03	0.63	0.19	0.49	-0.26	0.57	-0.02	0.04	0.03	0.42	0.18	0.1	0.08	0.45	0.57	0.41	0.03	0.08	0.29	0.39	-0.03	0.06	0.27	0.1	0.2	0.34	0.65	0.03	0.24	0.1	0.11
C11orf59	0.02	0.09	-0.06	0.18	-0.21	-0.07	0.43	-0.16	0.02	0.4	0.17	-0.29	0.14	0.3	-0.21	-0.12	-0.15	0.02	0.35	-0.64	0.35	-0.53	-0.18	-0.63	0.56	0.29	0.35	0.68	0.23	0.26	-0.51	-0.38	-0.19	0.36	0.35	0.34	0.04	-0.04	0.01	0.14	-0.21	0.18	-0.26	0.16	-0.24	-0.11	-1.01	NA	0.66
C11orf60	-0.08	0.01	0.335	-0.01	0.395	-0.07	0.275	0.365	0.39	-0.02	-0.45	-0.165	-0.035	0.085	0.2	-0.725	-0.01	-0.125	-0.055	-0.075	0.275	0.45	-0.04	0.16	0.32	0.06	0.145	0.09	-0.015	0.06	0.445	0.355	0.545	-0.34	0.055	-0.145	0.1	0.36	0.125	0.505	-0.295	0.13	0.12	0.14	-0.1	0.285	-0.25	0.21	0.33
C11orf61	-0.15	0.26	0.3	-0.35	0.48	0.56	0.27	0.65	-0.05	0.46	0.31	-0.26	-1.08	0.23	0.16	-0.59	-0.59	-0.06	-0.14	-0.81	NA	NA	NA	NA	-0.34	-0.9	0.1	1.07	0.22	-0.01	0.77	1.31	0.31	0.29	-0.06	0.48	0.28	0.45	0.19	0.6	-0.44	0.12	NA	0.65	1.47	-0.43	1.49	NA	1.88
C11orf63	0.105	0.005	0.195	-0.06	0.475	0.03	0.01	0.035	0.21	0.055	0.125	0.01	0.06	0.075	0.465	-0.11	0.06	0.04	0.215	-0.085	-0.025	0.13	-0.075	-0.225	-0.055	0.15	0.16	0.08	0.17	0.115	0.12	0.22	0.165	0.025	0	0.305	-0.075	0.195	0.165	0.275	0.015	0.095	-0.4	0.155	-0.32	0.3	0.5	-0.31	0.07
C11orf67	0.79	0.065	0.21	-0.07	-0.285	-0.165	0.415	-0.065	0.085	0.005	0.17	0.12	0.42	-0.125	0.235	0.4	-0.005	0.04	0.02	0.005	-0.02	0.385	0.245	0.03	-0.105	0.165	0.115	0	-0.115	0.12	-0.02	-0.12	-0.225	0.17	-0.055	0.06	0.05	-0.125	-0.08	-0.16	-0.225	-0.005	0.14	0.085	-0.215	-0.185	0.13	-0.38	-0.125
C11orf68	0.14	0.19	-0.06	-0.44	0.38	-0.09	0.13	-0.09	0.19	0.08	-0.12	-0.16	0.26	0.07	-0.06	-0.13	0.07	-0.08	-0.03	0.49	0.14	0.27	0.45	-0.09	0.12	0.08	-0.08	-0.18	0.05	0	-0.15	-0.26	0.05	0.03	0.22	0.14	-0.1	0.23	0.01	0.11	0.27	-0.15	0.33	-0.06	-0.4	NA	NA	0.08	-0.28
C11orf70	-0.23	-0.15	NA	-0.71	0.42	-0.52	0.12	-0.12	-0.08	0.24	0.13	-0.04	0	-0.11	0.62	-0.12	0.05	-0.04	0.09	-0.35	0.02	-0.17	0.19	-0.16	0.09	0.06	0.34	0.08	0.24	-0.15	-0.17	1.1	-0.04	-0.16	0.01	-0.3	-0.23	-0.07	0.06	0.85	-0.26	-0.03	0.03	-0.27	-1.4	-1.29	NA	NA	0.41
C11orf71	-0.24	-0.21	0.09	0.01	0.36	0.15	0.09	-0.06	0.62	-0.16	0.18	-0.04	-0.1	0.21	-0.21	0.16	0.4	0.07	-0.49	0.33	-0.7	0.27	-0.08	0.13	-0.58	-0.46	0.12	-0.27	-0.3	-0.22	-0.04	0.12	0.14	-0.11	0.33	-0.3	-0.47	-0.06	0.14	-0.13	0.15	-0.15	-0.07	-0.2	0.07	-0.43	-0.3	-0.04	-0.19
C11orf73	0.59	0.32	0.22	0.09	-0.24	-0.43	0.42	0.21	-1	0.21	-0.04	-0.12	-0.91	-0.34	-0.01	-0.86	-0.91	-0.18	-0.44	0.62	0.41	-0.12	-0.42	-0.33	-0.08	-0.33	0.37	0.93	0.37	0.38	-0.06	0.14	-0.38	0.22	-0.7	0.33	0.49	0.33	-0.34	-0.03	0.39	0.19	0.38	0.92	0.54	0.21	0.75	-1.01	-0.61
C11orf75	-0.25	-0.29	0.04	-0.02	-0.05	0.26	-0.01	-0.08	0.53	-0.08	-0.11	0.1	-0.44	0.13	0.12	0.3	0.58	0.02	-0.55	0.52	-0.62	0.08	-0.48	0.1	-0.97	-0.41	-0.03	-0.37	-0.47	-0.34	-0.27	0.2	-0.47	-0.23	0.01	-0.16	-0.63	-0.46	0.23	-0.43	-0.98	0.02	0.26	-0.34	-0.67	-0.14	-1.02	0.37	NA
C11orf76	0.28	0.1	-0.32	0.03	0.04	0.2	0.05	0.1	-0.05	-0.09	0.04	0.08	0.16	-0.09	0.2	-0.14	0.13	0.13	0.16	-0.73	0.09	-0.12	0.07	0.64	0.05	0.06	0.06	0.02	0.07	-0.07	0.13	-0.77	-0.18	-0.09	0.04	0.23	-0.24	-0.11	-0.06	-0.4	-0.35	0.05	0.01	0.1	0.07	0.1	0	-0.3	-0.37
C11orf79	0.62	-0.03	0.13	-0.22	-0.45	0.04	-0.11	-0.61	-0.56	0.12	-0.08	-0.23	-0.16	-0.75	-0.28	0.33	-0.77	0.01	0.23	-0.71	0.48	-0.16	-0.36	-0.46	0.24	0.04	0.11	0.58	0.05	0.22	-0.01	-0.26	-0.02	0.36	-0.44	0.07	0.12	-0.21	-0.6	-0.39	-0.25	0.02	-0.83	0.19	-0.23	-0.79	-0.21	-0.5	0.24
C11orf80	NA	-0.07	-0.52	-0.3	-0.22	0.11	-0.26	-0.21	-0.35	-0.2	-0.19	-0.16	0.14	0.09	-0.21	-0.23	-0.19	-0.09	-0.03	0.38	0.23	0.06	0	0.17	0.28	0.08	-0.16	0.12	-0.11	-0.12	0.29	0.6	0.31	-0.05	-0.19	-0.21	0.1	0.38	0.19	0.39	0.13	0.04	0.18	0.76	0.91	0.21	-0.56	-0.08	0.14
C11orf9	0.195	-0.165	0.11	0.15	-0.075	0.29	0.32	0.005	0.1	-0.23	-0.05	0.16	0.15	-0.045	0.155	0.34	0.17	0.14	-0.27	0.075	-0.405	0.245	0.1	0.305	-0.65	-0.155	-0.205	-0.665	-0.265	-0.145	-0.14	0.16	0.065	-0.29	-0.045	-0.375	-0.095	-0.075	-0.14	-0.49	-0.27	-0.1	0.07	-0.06	-0.31	-0.37	-0.455	-0.345	-0.38
C12orf10	-0.06	0.01	-0.23	0.19	-0.25	0.04	0.08	-0.05	0.11	0.04	-0.02	-0.2	-0.08	-0.13	0.15	0.31	-0.13	0.13	0.06	-0.46	0.08	-0.31	-0.03	0.01	0.03	0.14	-0.09	0.01	0.14	-0.11	-0.24	-0.32	-0.26	0.05	-0.04	0.16	-0.04	-0.22	-0.03	-0.34	-0.66	-0.06	-0.19	-0.09	-0.32	0.37	0.33	-0.22	0.14
C12orf11	-0.01	-0.005	0.455	0.07	0.07	0.21	0.085	0.295	-0.4	0.18	-0.195	-0.175	-0.025	-0.19	0.015	-0.175	-0.175	-0.13	0.11	-0.23	0.465	-0.125	0.065	-0.365	0.29	0.215	0.16	0.31	0.11	0.09	0.43	-0.175	0.3	0.155	-0.065	-0.035	0.1	0.56	-0.09	0.38	0.34	0.17	-0.34	0.12	0.11	0.085	1.05	0.58	0.47
C12orf12	-0.14	-0.04	NA	-0.48	NA	0.14	0.06	0.38	-0.27	0.04	-0.1	0.02	0.76	0.19	-0.3	0.19	-0.06	-0.11	0.46	-0.34	0.64	NA	0.13	0.38	0.57	0.18	0.07	0.02	-0.06	0.07	0.07	-0.45	0.18	0.03	0.28	-0.51	0.13	-0.59	0.06	0.58	-0.46	0.23	-0.22	NA	-0.69	0.79	-0.13	0.92	-1.13
C12orf24	0.84	-0.18	-0.02	-0.13	0.19	0.1	0.26	0.26	-0.33	0.13	0	0.12	-0.12	0.26	-0.23	0.31	0.07	-0.16	-0.15	0.08	-0.2	-0.04	0.27	-0.13	0.03	-0.13	-0.01	0.01	0.08	-0.2	0.1	0.05	-0.04	0.26	0.09	0.28	0.22	0.28	0.06	0.35	0.5	-0.04	-0.21	NA	0.37	0.16	0.06	NA	-0.48
C12orf25	-0.07	-0.34	-0.18	-0.39	-0.86	-0.31	-0.65	-0.7	-0.12	-0.51	-0.51	-0.4	-0.03	-0.51	-0.38	0.89	-0.36	-0.45	-0.48	-0.93	-0.78	-0.45	-0.11	-0.31	-0.83	-0.4	-0.62	-1.1	-0.52	-0.38	-0.43	-0.77	-0.49	-0.58	-0.61	-0.63	-0.42	-0.79	-0.69	-1.12	-0.35	-0.62	-0.55	-0.57	-0.63	-0.53	-0.77	-0.49	-0.5
C12orf26	0.72	-0.15	-0.03	-0.27	0.51	-0.27	-0.27	-0.28	0.09	-0.24	-0.11	-0.23	-0.13	-0.11	-0.4	0.81	0.13	-0.09	-0.47	-0.22	-0.67	0.05	0.12	-0.29	-0.61	-0.36	-0.48	-0.77	-0.35	-0.21	-0.26	-0.75	-0.38	-0.18	-0.06	-0.36	-0.31	-0.23	-0.15	-0.34	0.1	-0.25	0.25	-0.42	-0.47	-0.49	-0.34	-0.72	-0.36
C12orf29	0.38	0.035	0.21	0.205	-0.21	-0.015	-0.05	-0.035	-0.105	0.11	-0.17	0.065	0.595	-0.015	0.235	-0.23	-0.08	0.175	0.295	0.665	0.44	0.095	0.065	0.41	0.465	0.555	-0.105	0.355	0.155	0.225	0.345	0.71	0.2	0.415	0.27	0.27	0.34	0.21	0.055	0.125	0.18	0.16	0.235	0.35	-0.045	0.14	0.305	0.5	0.34
C12orf30	NA	-0.04	0.31	0.02	-0.24	-0.59	0.1	-0.27	-0.51	-0.03	0.19	-0.05	-0.13	-0.23	0.53	-0.35	-0.22	-0.27	0.27	0.7	0.39	0.06	-0.01	0.73	0.51	0.22	0	0.3	0.1	0.26	0.6	NA	0.13	0.16	-0.08	-0.17	0.54	0.11	-0.08	0.32	0.88	0.4	0.79	-0.2	-0.26	-0.49	0.46	NA	0.88
C12orf31	0.18	-0.04	0.135	0.235	-0.165	0.11	-0.07	0.185	-0.325	-0.045	-0.195	0.01	0.26	-0.19	0.13	-0.425	-0.27	-0.045	0.235	0.07	0.47	0.025	0.105	0.17	0.125	0.285	-0.06	0.005	0.06	0.025	-0.015	0.115	0	-0.05	-0.085	-0.1	0.115	-0.065	-0.09	-0.4	0.005	-0.05	-0.91	0.305	0.11	0.165	0.3	-0.01	0.4
C12orf32	0.55	0.08	-0.34	-0.16	0.23	-0.46	-0.08	-0.1	-0.18	-0.13	-0.05	-0.1	-0.11	-0.18	-0.1	0.31	-0.14	-0.08	-0.11	0.03	-0.26	0.23	0.03	-0.62	-0.28	-0.08	-0.2	-0.2	-0.19	-0.07	-0.68	-0.77	-0.43	0.14	-0.23	-0.2	-0.01	-0.39	-0.18	-0.36	-0.03	-0.1	0.29	-0.14	-0.58	0.24	-0.17	-0.76	-0.28
C12orf33	-0.09	0.11	0.27	-0.14	0.04	-0.02	-0.03	-0.1	0.44	-0.04	0.18	0.16	0.46	0.17	0.19	-0.54	0.42	0.12	-0.34	0.15	-0.46	0.35	0.36	0.26	-0.37	0	0.05	-0.52	-0.06	-0.09	0.1	0.17	0.31	0.01	0.1	-0.03	0.24	-0.15	0.11	0.22	0.2	-0.04	0.28	-0.2	-0.27	-0.02	-0.31	0.24	0.42
C12orf34	0.113333	0.106667	-0.303333	0.113333	0.47	0.29	-0.13	0.113333	0.705	-0.0966667	0.21	0.173333	0.27	0.23	0.0566667	-0.03	0.296667	0.16	-0.05	0.253333	-0.25	0.273333	0.0433333	0.353333	-0.116667	0.116667	-0.0666667	-0.476667	0.0433333	-0.156667	0.0433333	0.126667	0.04	-0.146667	0.226667	-0.173333	-0.02	0.273333	0.256667	-0.0333333	-0.106667	0.0266667	0.15	-0.05	0.00333333	-0.0866667	-0.27	0.0833333	0.0666667
C12orf35	-0.55	-0.395	0.095	0.025	-0.055	-0.27	0.2	0.27	-0.95	-0.005	0.385	0.025	-0.48	-0.755	0.08	-0.38	0.505	-0.005	0.3	-0.13	0.145	-0.65	-0.43	-0.625	0.395	-0.025	-0.13	0.805	0.26	0.22	0.295	0.275	-0.255	0.31	-0.335	0.025	0.18	-0.185	-0.625	-0.32	0.01	0.155	-0.59	0.23	0.51	0.34	0.75	0.75	0.22
C12orf38	-0.23	-0.02	0.09	0.42	-0.04	0.44	0.09	0.11	0.8	0.05	0.25	0.23	-0.21	0.49	0.37	-0.43	0.73	0.21	-0.21	0.47	-0.51	0.03	-0.27	0.28	-0.07	-0.19	0.12	-0.23	-0.19	-0.19	0.26	0.67	0.16	-0.18	0.35	-0.3	-0.24	0.04	0.47	-0.24	0.17	0.04	0.17	NA	0.62	-0.16	-0.49	NA	0.04
C12orf39	0.92	0.3	0.21	0.06	0.34	0.14	0.71	0.42	0.46	0.49	0.66	0.14	-0.71	0.58	0.25	0.04	0.25	0.16	-0.19	-0.37	-0.19	-0.14	-0.3	-1.02	-0.16	-0.43	0.73	0.34	0.34	0.26	NA	-0.06	0.03	0.23	0.25	0.57	-0.13	0.3	0.45	0.7	0	0.15	0.16	0.23	-0.89	-0.28	0.61	NA	-0.46
C12orf4	-0.115	-0.11	0.345	0.05	0.19	-0.325	-0.01	0.105	-0.14	0.06	0.05	0.145	-0.075	-0.235	-0.045	0.115	0.04	0.04	0.1	0.185	-0.075	0.165	0.305	-0.155	-0.165	0.15	0.04	0.04	-0.045	0.025	0	-0.055	0.07	-0.155	-0.2	0.135	0.07	-0.21	0.055	-0.065	0.09	-0.025	0.175	-0.255	-0.3	-0.02	0.11	-0.36	0.075
C12orf41	-0.17	-0.116667	-0.205	0.353333	-0.443333	-0.106667	1.85e-17	0.08	0.0233333	0.303333	-0.02	-0.01	0.176667	0.00666667	-0.36	0.163333	0.06	0.09	0.0166667	0.166667	-0.11	0.0633333	-0.21	0.0466667	0.0666667	-0.03	-0.0466667	0.21	0.0266667	0.106667	-0.14	-0.303333	0.02	0.19	0.0966667	0.133333	0.126667	0.06	0.116667	0.29	0	0.0866667	-0.225	0.126667	0.07	-0.15	0.26	-1.3	1.09
C12orf43	-0.24	0.03	0.21	0.45	0.22	0.11	0.26	0.33	0.12	0.25	0.29	-0.05	-0.57	0.19	0.13	0.07	0.35	0.03	0.03	0.2	-0.38	0.14	-0.34	0.1	-0.37	-0.46	0.14	0.34	-0.09	0.01	0.03	0.09	-0.4	-0.08	0.13	0.11	-0.01	0.23	0.15	0.42	0.11	0.05	0.01	0.12	-0.25	0.23	0.28	0.6	-0.12
C12orf44	0.15	0.05	-0.06	0.17	0.14	0.05	0.14	0.26	0.3	0.05	0.21	0.09	-0.39	0.09	-0.04	-0.07	0.13	-0.02	-0.09	0.25	-0.21	0.07	-0.28	-0.07	-0.41	-0.15	0.19	0.07	0.17	0.04	-0.28	-0.18	0.06	-0.04	0.03	0.08	-0.02	-0.09	0.14	-0.02	-0.01	-0.01	-0.15	0.16	-0.35	0.23	-0.16	-0.1	-0.17
C12orf47	0.0966667	-0.16	0.0166667	-0.216667	0.0233333	-0.13	-0.18	-0.236667	-0.14	-0.206667	-0.136667	-0.0266667	0.02	-0.253333	-0.085	0.313333	-0.0433333	-0.03	0.0133333	0.07	0.0233333	-0.04	0.00666667	0.196667	-0.176667	-0.0233333	-0.193333	-0.123333	-0.196667	-0.0466667	-0.12	-0.305	-0.11	0.0433333	-0.136667	0.0833333	-0.11	-0.196667	-0.0966667	0.226667	0.143333	-0.0133333	0.0466667	-0.0733333	0.0666667	-0.07	-0.325	0.14	-0.155
C12orf48	NA	-0.29	NA	-0.06	NA	NA	-0.22	0.48	0.34	0.08	0.1	0.23	-0.93	-0.02	1.9	NA	-0.17	0.22	-0.2	0.25	-0.11	1.22	NA	0.71	0.01	0.16	0.19	-0.05	0.37	0.04	0.46	NA	NA	-0.33	-0.05	-0.34	0.19	0.35	-0.37	-0.28	NA	-0.17	NA	0.45	0.45	-0.09	NA	NA	NA
C12orf49	0.285	0.09	0.695	0.32	0.035	0.48	0.365	0.035	0.55	0.09	0.08	0.155	0.48	0.43	0.34	-0.915	0.525	0.325	-0.07	0.715	0.35	0.355	0.445	0.315	0.155	0.42	0.36	0.315	0.11	0.27	0.475	0.6	0.57	0.175	0.62	-0.07	0.195	0.31	0.525	-0.125	0.53	0.095	0.24	0.36	0.305	0.16	0.32	1.28	0.52
C12orf5	0.92	-0.1	0.17	-0.3	0.26	-0.09	NA	0.34	-0.07	0.02	0.48	0.31	-0.39	0.06	0.12	-0.09	-0.02	0.08	0.28	0.12	0.1	0.06	0.03	-0.38	-0.16	-0.02	-0.29	0.27	-0.12	0.82	0.13	-0.63	0.23	-0.01	-0.6	0.42	0.05	0.36	0.03	0	-0.06	0.11	-0.57	-0.26	-0.74	0.44	0.42	NA	0.12
C12orf52	0.315	0.25	0.255	0.195	0.175	0.11	0.28	0.025	0.125	0.115	0.21	0.17	0.64	0.08	0.04	-0.635	-0.025	0.145	0.27	0.48	0.825	0.37	0.425	0.385	0.635	0.625	0.005	0.355	0.15	0.19	0.355	0.525	0.665	0.235	0.285	-0.2	0.21	0.41	0.135	-0.015	0.42	0.19	0.275	0.34	0.715	0.175	0.44	0.445	0.075
C12orf56	0.31	-0.01	0.28	0.07	-0.01	-0.02	0.06	0.2	0.19	0.03	0	0.17	-0.21	-0.05	0.22	0.46	0.07	0.09	-0.02	-0.19	-0.11	0.26	0.15	-0.15	-0.12	0.02	0.28	-0.03	-0.06	0.16	-0.41	-0.3	-0.27	0.01	-0.03	0	-0.14	-0.09	-0.13	0.02	-0.21	0.33	0.01	0.06	0.03	0.24	0.1	0.09	-0.18
[truncated: 13,124 more rows]
[truncated: 17 more columns]
