# Supplementary material for: Exploration of Potential Integrated Models of N6-Methyladenosine Immunity in Systemic Lupus Erythematosus by Bioinformatic Analyses
Source: Front Immunol. 2022 Feb 7;12:752736. doi: 10.3389/fimmu.2021.752736 (PMC8859446; doi:10.3389/fimmu.2021.752736)
Supplement: Supplementary Table 11 — Datas of the gene expression of GSE39088. [file Table_11.xlsx]

## Sheet: Sheet1
Genes	GSM955680	GSM955681	GSM955682	GSM955683	GSM955684	GSM955685	GSM955686	GSM955687	GSM955688	GSM955689	GSM955690	GSM955691	GSM955692	GSM955693	GSM955694	GSM955695	GSM955696	GSM955697	GSM955698	GSM955699	GSM955700	GSM955701	GSM955702	GSM955703	GSM955704	GSM955705	GSM955706	GSM955707	GSM955708	GSM955709	GSM955710	GSM955711	GSM955712	GSM955713	GSM955714	GSM955715	GSM955716	GSM955717	GSM955718	GSM955719	GSM955720	GSM955721	GSM955722	GSM955723	GSM955724	GSM955725	GSM955726	GSM955727	GSM955728
A1BG	-0.400948	-0.670691	-0.270214	-0.493032	-0.309757	-0.125314	-0.796077	-0.281764	-0.232818	0.168229	-0.27517	-0.170409	-0.585544	0.036718	-0.224065	-0.0200142	-0.244813	-0.365943	-0.501838	-0.139243	-0.0219474	-0.277745	0.328646	0.215157	0.371633	-0.309041	0.102876	-0.403991	-0.0627935	-0.645477	0.140533	-0.190772	-0.0434359	-0.092614	0.280159	0.369128	0.00979304	-0.220585	0.129784	-0.0995456	-0.0733731	-0.139929	0.0717978	-0.189055	-0.198025	-0.0745356	-0.112874	0.0273849	0.196325
A1BG-AS1	-0.243413	-0.166033	-0.131512	0.0759303	-0.148559	-0.0815118	-0.449627	0.0407194	-0.099425	0.160726	-0.335996	-0.0512283	-0.305827	0.17217	0.0576284	0.13219	-0.134954	-0.139001	-0.225308	-0.314906	-0.47762	-0.0885592	-0.250505	-0.261117	0.182565	-0.11243	0.0234608	-0.445409	0.0203155	0.146225	-0.0531115	0.123961	0.205369	-0.0105506	0.212572	0.383687	0.22332	0.132639	0.123646	0.0475412	-0.0867224	0.0488562	-0.147271	0.0540342	-0.168177	-0.0134146	-0.119532	0.000467335	-0.21029
A1CF	0.1443	-0.0144006	0.343387	0.26774	-0.0995456	0.125484	-0.0216224	0.194354	0.594226	0.319798	0.0731167	0.442533	0.0271613	-0.381969	0.158779	0.173025	-0.141988	0.56864	0.0990662	-0.0724177	0.265037	0.306911	0.0884339	-0.069074	0.167778	-0.0905462	-0.252464	-0.498785	-0.290402	-0.370761	-0.268228	0.0117514	0.321745	-0.137265	0.351052	-0.0174688	-0.0288624	-0.202798	0.159416	0.215645	0.613049	-0.297138	-0.295119	-0.191075	0.088909	0.335465	0.113617	-0.310798	-0.157031
A2M	0.45642	0.0947038	0.120479	0.194408	-0.0779537	0.139834	-0.0284245	-0.0151395	0.303778	0.298941	0.14935	0.0878919	0.00730341	-0.218003	-0.0418193	0.189517	-0.198691	-0.0518379	-0.396938	0.0591273	0.175686	0.370542	0.0284316	-0.139377	0.339683	-0.0737508	-0.0810926	-0.468045	-0.0577596	-0.175541	-0.134319	-0.208197	0.0938739	-0.0859551	0.266636	-0.0998409	-0.30849	0.229025	-0.1373	0.331473	0.431043	-0.163319	-0.20742	-0.0721643	0.177244	0.011721	0.0861825	0.18198	0.104894
A2M-AS1	0.946564	-2.10387	0.407259	2.22238	-0.360754	0.841375	1.20095	-0.302967	1.95309	-0.779886	1.51418	0.0744317	1.65918	1.59083	0.721645	0.276083	1.80491	1.98929	0.912002	0.0935707	-0.118645	2.49994	0.0836251	0.515899	0.141157	2.07672	0.770506	0.562255	0.754231	0.388545	1.77352	1.44101	-0.0890048	-0.620412	0.126991	-0.171829	0.797161	0.830966	0.720897	-0.452666	-0.161603	1.65918	1.59083	-1.20023	1.1589	-0.26337	-0.59566	-0.711479	-0.0838589
A2ML1	-0.189097	0.00935168	-0.0889127	0.0772948	0.236631	-0.0265654	0.145277	0.0923918	0.165141	-0.0018158	-0.029691	-0.0351253	0.134213	-0.0377973	0.0835903	0.0816679	-0.114711	-0.0321002	0.0374222	-0.0945835	0.176239	0.149423	-0.0491991	-0.134198	0.0910812	-0.0645439	0.00740373	-0.18373	-0.0744508	0.0625561	0.0774463	-0.118035	-0.0130504	-0.266387	0.235113	0.0706813	-0.109632	-0.18209	-0.0721643	0.174324	-0.0436753	-0.120484	-0.123223	-0.0151681	-0.0215273	-0.0660619	0.227851	-0.178575	0.0312864
A2MP1	0.078917	-0.0342566	-0.0627607	0.222825	0.268331	0.265413	0.220974	0.734602	0.735589	0.244906	0.277581	0.178395	-0.223213	-0.0595759	0.0416516	0.185994	0.203564	0.337492	0.207758	0.136311	0.158414	0.24733	-0.324087	-0.157569	-0.0303513	-0.377034	-0.249171	-0.175503	-0.36619	-0.223272	-0.405486	-0.0517847	0.154988	0.445382	-0.153119	0.210793	-0.00342773	-0.47979	-0.215072	0.488512	0.284872	-0.346085	0.316004	-0.0367527	0.617846	0.833633	0.383198	0.0690564	-0.216809
A4GALT	-0.334649	-0.510498	0.0303295	0.10486	-0.27114	-0.0738991	-0.542864	-0.125841	-0.236424	0.0336332	-0.148334	0.155656	-0.189709	-0.313446	0.167778	0.406988	-0.383357	-0.120017	-0.0728177	-0.126867	-0.533058	-0.169464	0.535395	0.0673361	0.234461	-0.334063	0.0110773	-0.431855	-0.28802	-0.266387	-0.165676	-0.101494	0.42543	-0.376505	0.646688	0.567626	0.0788927	-0.031167	-0.014551	-0.020718	0.11278	-0.406095	-0.135295	0.128633	-0.0557679	-0.274823	-0.231788	0.393815	0.0317812
A4GNT	0.354011	0.363966	0.00707774	0.0628008	0.0634364	-0.19574	-0.185861	0.36237	0.0352572	-0.200351	0.490076	0.110863	0.17582	-0.0378518	-0.141263	-0.0225932	0.08527	0.183016	0.368197	0.0284316	-0.240872	-0.0789309	-0.0406328	0.624178	-0.27989	-0.70446	0.0022546	-0.199207	-0.0265209	0.140122	-0.175346	0.143074	0.0762135	-0.408406	-0.162269	0.070551	-0.216073	0.174191	-0.0917524	0.182515	0.363738	0.0355266	-0.143705	0.0969593	0.226729	0.335657	0.22277	-0.0932631	-0.204462
AA06	0.0612061	-0.33302	-0.1195	-0.0508139	0.127827	0.394341	-0.23264	-0.140133	0.0927234	0.268999	-0.0724468	0.420525	-0.334554	-0.232391	-0.118418	0.291355	-0.606214	0.0851818	-0.0978328	-0.134261	0.141387	0.224181	0.0835044	-0.242247	0.203302	-0.335018	-0.442615	-0.127693	-0.1868	-0.0874947	-0.260381	0.0344416	-0.0492867	0.0399447	0.641683	0.159582	-0.0434973	-0.212087	-0.325948	0.225217	0.508526	-0.00798462	-0.0825894	-0.267037	0.101483	0.281546	-0.244317	0.0814237	-0.256088
AAAS	0.286571	-0.0682814	-0.0393621	-0.201402	0.194214	0.164835	0.164616	-0.0886162	0.182109	0.0589425	-0.0410097	0.569394	-0.188255	-0.0521674	0.25925	0.278736	-0.446475	0.404471	-0.0381251	-0.210047	-0.123595	0.00840748	0.14576	0.0977609	0.440613	-0.209005	0.0615762	-0.103681	0.00763551	0.101831	0.0098448	0.865131	0.407259	0.199015	0.195866	0.366741	-0.169577	0.0202597	0.112916	0.109916	0.368437	0.0312326	0.189739	0.325615	0.733756	-0.0453241	-0.0176647	0.0341989	0.108064
AACS	0.540644	0.199208	0.0788345	0.0275981	0.69008	0.109408	0.375513	-0.057225	-0.213755	0.0402404	0.0377882	-0.535521	-0.00145594	0.207382	-0.0253775	-0.404905	0.186634	0.474217	0.818186	0.244966	0.172788	0.377934	-0.293214	0.265586	0.0797612	-0.0147751	0.270079	0.0339556	0.540914	0.118909	0.262444	0.0485146	-0.217159	0.224763	0.167983	0.174662	0.134175	-0.0151167	0.185687	0.299009	-0.224012	0.293451	0.0170538	0.315153	-0.325948	-0.0253084	-0.116344	-0.392458	0.0340604
AACSP1	-0.0814818	-0.159157	0.2343	0.369989	0.143681	0.156705	0.0721335	0.408712	0.180484	-0.0390149	-0.21052	-0.00584155	0.12753	-0.0441381	0.0671076	-0.0482447	0.0805018	-0.191892	-0.155247	0.00233511	-0.0130763	-0.093807	-0.0638413	0.195605	0.14158	0.0623422	0.118404	-0.161519	-0.285249	0.0589707	-0.0133883	-0.0575798	0.161984	0.0668451	0.433758	-0.186283	-0.0331267	0.0504565	-0.287366	-0.0410883	0.0891611	-0.241827	-0.30373	0.146597	-0.211524	0.107183	-0.0741837	-0.0930521	0.180191
AADAC	0.216317	0.110344	-0.220413	-0.250574	0.0525199	0.225024	0.221609	0.0114757	0.311437	0.29642	-0.0736918	-0.0582037	0.0843483	-0.13025	-0.0930897	0.166774	-0.15747	0.304952	-0.0570381	-0.110074	0.223491	0.0893715	-0.210188	0.0473542	-0.23264	0.0937013	-0.097198	-0.0862886	-0.00330649	0.118442	-0.28993	-0.092398	0.151624	0.54839	-0.0974114	0.0829806	-0.102547	0.345763	-0.0592686	0.0644846	0.00102017	0.0290553	-0.173349	-0.242877	-0.172465	-0.207299	0.0626615	0.209828	0.00177838
AADACL2	-0.0579469	-0.0959973	0.271555	0.273086	0.150065	-0.134954	-0.2632	0.303255	-0.0293456	-0.237032	0.0500081	-0.0952032	0.0473542	-0.017223	0.110445	0.0628604	0.111252	-0.0283476	-0.200266	-0.191284	-0.000178351	0.172561	0.106242	0.0369369	-0.116639	0.139175	-0.144206	0.291422	0.0378949	-0.278895	0.0727184	-0.142345	0.21247	-0.357843	-0.020718	0.0274091	-0.276017	-0.160397	0.14619	-0.117744	0.0281502	-0.0379938	-0.186721	-0.356636	-0.141656	0.1018	-0.00925978	-0.0630129	0.0570338
AADACP1	0.162123	0.273569	-0.353961	0.237336	-0.00887455	0.488927	0.102463	0.196818	-0.0497536	0.0421362	0.0186915	0.138432	-0.100017	-0.147205	-0.153537	0.0420268	-0.00163065	-0.00306335	-0.153337	-0.118418	-0.234386	-0.13488	0.052613	-0.121469	-0.331697	0.036963	-0.0764173	0.100674	0.030473	-0.493032	0.0149458	0.478243	-0.192775	-0.270843	-0.0736052	-0.154546	-0.2132	-0.322687	-0.15747	-0.142555	-0.0310421	-0.114225	-0.274453	0.0457727	-0.174703	-0.183804	0.134459	0.00295956	0.016987
AADAT	-0.054036	0.177114	0.209232	-0.123663	0.0679992	-0.506631	-0.198194	0.270836	0.386732	0.733756	-0.00110946	0.0836251	-0.325203	-0.359274	0.0125643	0.281267	-0.423538	0.0490526	0.0398852	-0.177252	0.0157727	0.0283528	0.131316	0.0349036	0.212229	-0.110353	-0.126792	0.0592937	-0.459399	-0.0233319	-0.424883	-0.200697	0.232381	-0.280316	0.662157	-0.0086933	-0.302287	0.0240187	0.376656	0.293968	0.0359745	-0.270104	-0.142238	-0.294641	-0.0593694	-0.104386	0.377063	0.156134	-0.225977
AAGAB	0.299714	-0.0302127	-0.370989	0.331284	0.103988	0.0394125	0.0473274	0.0667496	0.109548	-0.0692776	0.353813	0.00997196	0.0424396	0.116587	-0.208376	-0.165915	0.123238	-0.148834	0.177196	-0.0270715	-0.204824	-0.183011	-0.279955	-0.0335028	0.0446237	0.158741	0.169555	0.0388382	0.194742	0.137232	0.0617864	-0.146657	-0.179255	0.0423168	-0.0911605	-0.307289	0.182916	-0.165076	-0.00211516	-0.147724	-0.0273987	0.0220972	0.223435	-0.163291	-0.0879264	-0.0701431	-0.111016	-0.0244616	0.0212006
AAK1	0.170366	-0.257953	-0.169362	0.324691	0.277643	0.259622	0.405258	0.169388	0.332061	-0.0353553	0.199761	-0.0666456	0.232968	0.4234	-0.0593454	-0.102207	0.189459	0.142588	0.301862	0.220974	0.0374814	0.191216	0.0729299	0.0670799	-0.0837666	-0.138112	0.215157	0.192677	0.21542	0.227612	0.237792	0.205167	-0.0400622	-0.0168175	0.127093	0.00223412	0.138619	0.270007	-0.223639	0.125132	-0.0213678	0.530094	0.248408	0.0720007	0.0590925	-0.0753328	0.140267	0.0870643	0.165062
AAMDC	-0.238432	-0.34363	-0.212963	-0.193876	-0.0614175	-0.198321	-0.254522	0.0611154	-0.176824	-0.168054	-0.118709	-0.0270958	-0.130147	-0.257342	-0.0180521	0.0223379	-0.397463	-0.384867	-0.136096	-0.315839	-0.421061	-0.300141	-0.0179431	-0.251478	-0.115314	-0.0921001	0.0622557	-0.0666456	-0.0293011	-0.617097	-0.0858957	-0.29209	0.00702869	-0.20824	0.00472881	-0.142843	-0.141334	0.12577	0.0472659	-0.127631	0.0685333	-0.171789	0.130629	-0.167037	0.00394737	-0.24202	-0.122833	0.0890416	-0.27172
AAMP	0.311437	0.030656	0.0416012	0.0662659	0.049873	-0.171271	0.0460663	-0.0413702	-0.369236	-0.0872711	0.0373206	0.125688	-0.0295086	0.0968382	0.0972746	-0.130415	0.0656071	-0.0177393	0.440233	-0.0626807	0.238669	0.185121	0.20276	0.129856	0.0447548	0.172837	0.0758981	0.036718	0.223545	0.0104913	0.196864	-0.0270433	-0.0444788	0.0701401	0.0990662	-0.0183289	-0.00854057	0.20256	-0.178466	-0.0731748	0.12742	0.0720473	-0.114162	-0.208006	0.0508899	0.262377	-0.010807	0.047125	-0.0455121
AANAT	-0.305827	0.0283327	0.347493	0.26099	-0.0431223	-0.0939673	-0.303493	0.191969	-0.266975	0.479386	-0.0276861	0.0780785	-0.300856	-0.222496	0.39229	0.0849261	-0.799848	0.052065	-0.187627	-0.00478876	0.116894	0.0900249	0.39219	-0.0247873	0.00768536	0.0930739	-0.107406	-0.129216	-0.48623	-0.463204	-0.324271	-0.235715	0.270261	0.179795	0.039358	0.769491	0.0247081	0.119965	0.0176718	0.281267	0.298228	-0.542521	-0.318206	-0.0876478	-0.0559827	-0.038018	0.0790177	0.173025	-0.323528
AAR2	0.13944	-0.142456	-0.455579	-0.157102	0.29924	-0.209283	-0.0258005	0.00772753	-0.198321	-0.0231902	0.142512	0.0572878	-0.0863222	0.253844	0.00213109	0.0109639	0.246867	0.0369369	0.164133	0.354759	0.236482	0.0821694	-0.0253528	-0.176687	-0.385696	0.103418	0.0828806	0.221504	0.256052	0.343179	0.218105	0.0264644	-0.0848191	-0.046848	-0.0616281	0.101638	0.0435279	0.0704261	0.0164287	-0.200351	-0.184305	0.526251	0.0493827	-0.184088	0.0429007	0.0603247	-0.0792557	-0.122129	0.168772
AARS	0.171	-0.0539407	-0.20796	-0.114358	0.331806	0.0749643	0.59801	-0.11389	-0.144206	-0.34745	-0.107202	-0.0228747	0.0658678	0.427758	-0.0495493	-0.184997	0.1018	0.247894	0.690901	-0.0480021	0.126823	0.33252	-0.0538826	0.15508	0.123893	0.0592759	0.0712631	0.327237	0.396297	0.404702	0.320186	0.112272	0.0614679	0.0564764	0.139283	-0.109109	-0.0674469	0.347351	0.0362726	0.230045	0.0972746	0.311966	0.0669867	0.0572878	0.0294896	0.0138339	-0.0450343	0.107457	-0.00449433
AARS2	0.150107	-0.252089	-0.11389	0.144429	0.126288	-0.209592	-0.257896	0.15315	0.00482728	-0.023258	-0.197378	0.210905	-0.150279	0.209917	0.210025	-0.0628227	0.0100181	0.0692291	0.0810042	0.0495733	0.0798213	0.00932807	-0.00322627	-0.0194398	-0.117771	0.176285	0.195648	-0.209005	0.176609	0.0207099	0.0788026	0.175895	0.114462	-0.00960234	-0.0222863	0.0596972	-0.173661	0.172393	-0.0946092	0.00470538	0.0349558	0.0197972	-0.19194	-0.292295	0.12642	-0.26907	-0.00977601	-0.15288	0.202905
AARSD1	-0.296999	0.0596972	0.12779	-0.391252	-0.372507	-0.135324	-0.0328293	-0.210608	-0.245345	0.415192	-0.427874	-0.355468	0.159869	0.0865814	-0.439161	-0.00753593	-0.444322	-0.670691	-0.288782	-0.225353	-0.298131	-0.181397	0.0254036	0.177114	0.272414	0.0438701	0.169095	-0.0551401	0.306173	0.0455304	0.149383	0.130488	0.129033	-0.0225474	0.0857756	-0.353872	-0.384992	0.0317245	-0.317279	-0.279162	-0.0222399	-0.147271	-0.184224	0.271348	-0.263487	-0.238106	-0.155373	-0.0569877	0.198855
AASDH	0.553843	-0.119593	-0.0182309	0.242658	-0.130109	0.146878	-0.0602183	-0.322618	0.121081	0.262212	0.193567	-0.184443	0.261496	0.448239	-0.10893	-0.0970825	0.400049	-0.135423	0.285218	0.210071	0.316673	-0.0904149	-0.277558	0.130226	-0.115532	-0.190571	0.693595	0.507113	0.349158	0.516769	0.355787	-0.223078	-0.0236975	-0.0350988	-0.247271	-0.272252	0.475903	0.801647	0.596236	-0.469184	-0.222009	0.262159	0.528584	0.398555	-0.284585	-0.272749	-0.0596624	0.0773589	0.0969593
AASDHPPT	0.148787	0.0280981	0.336045	0.376393	-0.0525983	-0.011285	0.291492	-0.162701	-0.0337639	0.151983	0.274259	-0.201324	-0.023283	0.31113	0.0379461	-0.184133	0.280787	0.184399	0.346179	0.485448	0.369521	0.213065	-0.228953	-0.0482749	-0.437435	0.161741	0.248784	0.22706	0.350047	0.253259	0.139992	-0.253387	-0.261238	0.0514559	-0.184005	-0.322618	0.0874449	0.00507396	-0.126727	-0.319327	-0.391499	0.370193	0.238489	0.144429	-0.0102221	-0.13461	0.0452235	-0.0439762	0.220232
AASS	0.0947639	-0.187203	0.478693	0.431826	-0.0856689	0.989792	0.684266	-0.0114021	-0.0225723	-0.0514937	0.433894	-0.170656	0.335863	-0.359379	0.23028	-0.0181535	-0.0433573	0.253682	0.047732	0.455108	0.591264	0.123144	0.377338	0.194559	-0.160439	0.350545	0.221817	0.00950617	0.215157	0.292189	0.16627	-0.175771	-0.122287	-0.105988	0.18615	0.199456	0.185251	0.572185	0.375704	-0.0450867	-0.00237396	0.226309	0.266312	0.111894	0.163676	-0.216613	-0.118901	-0.170972	0.272279
AATBC	0.146149	0.166681	0.400049	0.0968071	0.257874	-0.264299	-0.119352	-0.579162	0.119067	0.761069	0.439879	-0.571246	0.108064	0.109646	-0.431447	-0.382748	1.22413	-0.726869	0.596236	0.0908567	0.0964356	-0.311918	-0.185656	0.468605	-0.979391	-0.0661446	-0.408993	-0.323174	-0.120587	-0.180456	0.44728	-0.282676	-0.474449	0.401891	-1.01568	-0.609876	-0.149706	0.17773	-0.819869	-0.0382215	-0.539436	0.287322	-0.755651	0.0654611	-0.0325782	-0.544457	-1.69598	-1.62442	-1.20023
AATF	-0.0664585	-0.281326	-0.122063	0.0149957	0.172014	-0.173349	0.0363228	-0.574168	-0.235931	-0.435273	-0.484485	-0.0455121	0.19015	0.184659	0.27933	-0.453836	0.0444999	-0.144129	-0.162886	0.0486046	-0.159468	-0.125066	-0.0334126	0.388406	0.113483	0.385276	0.0565224	0.322962	0.31113	0.181754	0.330644	0.227454	-0.188211	-0.378579	-0.0190321	-0.139575	0.214909	0.179576	0.0327302	-0.0725758	-0.109568	0.183834	0.130003	0.0945427	-0.733903	0.214956	-0.527618	-0.189447	-0.179002
AATK	-0.138205	0.355787	0.613495	-0.188553	-0.126131	-0.269459	-0.0319357	0.151042	0.114836	0.239848	-0.00379215	-0.00492785	-0.0421173	-0.447842	0.0388382	0.0151244	0.0644321	-0.0209135	0.132328	0.186197	0.100706	0.580895	-0.131218	-0.000956499	0.0612347	0.265091	-0.591203	-0.0807915	-0.655062	-0.612102	-0.684827	0.152799	0.0257106	-0.388137	-0.444322	-0.0989292	-0.796077	0.31781	-0.720947	0.156875	0.208999	-0.245531	-0.0436753	-0.0201621	0.157289	0.470196	0.295002	0.0418088	-0.23783
ABAT	-0.0353818	0.542716	0.398305	0.687045	-0.0731748	-0.127842	-0.152422	-0.122609	-0.0636139	-0.350529	-0.271598	-0.21248	0.487735	0.00924628	1.00272	0.0421906	0.230751	-0.142161	0.345963	-0.441778	-0.556517	-0.119352	0.106621	0.192548	0.0943134	0.363852	-0.175052	-0.323897	0.232968	0.190787	0.0692291	0.0466803	-0.0725011	0.43166	-0.242992	0.203843	0.205858	0.254863	0.099551	0.0926627	0.0135849	0.069261	0.505835	0.270146	0.272096	-0.000986122	-0.750134	-0.412876	-0.499852
ABCA1	0.0604501	-0.0134387	-0.145699	-0.191	-0.457832	-0.0407426	-0.0432583	-0.14044	0.0062007	-0.369835	-0.737001	-0.365844	0.454048	-0.0624305	0.0438399	-0.00651941	-0.563064	-0.518259	-0.726869	-0.232864	-0.148704	-0.446133	-0.219935	-0.782686	-0.382959	0.00618174	-0.466713	-0.679744	-0.778307	-0.159765	-0.335996	-0.654542	-0.923604	-0.821926	-0.510778	-0.159157	-1.59214	-0.141693	-0.88679	-0.293214	-0.391003	-0.362259	-0.641089	-0.649065	-0.474887	-0.158968	0.265091	-0.0408448	0.373521
ABCA10	0.247894	0.212325	-0.18012	0.2586	0.0917689	0.211064	0.165685	0.0836629	0.688419	0.312872	0.350047	-0.179535	-0.0310928	-0.184735	-0.119953	0.0145538	-0.0600347	0.264224	0.00856687	0.0442079	0.129344	-0.0322705	-0.179002	-0.0427903	0.103761	-0.125841	-0.412202	-0.125875	0.00745704	-0.0617029	-0.603777	0.082571	0.104737	0.229768	-0.0696128	0.146523	-0.491958	-0.38286	0.14266	-0.0269505	-0.0158262	-0.0137476	0.0739025	-0.178785	0.164092	0.339683	0.34444	-0.116707	-0.283342
ABCA11P	0.382308	-0.675361	-0.0542342	0.368103	-0.188513	-0.333511	-0.0629835	-0.00778251	-0.541436	-0.133929	-0.104207	-0.379221	0.0675767	0.143807	0.294785	-0.330975	-0.0179431	-0.517394	0.00177838	0.240077	-0.00471867	0.00625835	-0.00813908	-0.0767157	0.233707	0.917294	0.33054	0.307922	0.174063	0.329715	0.115658	-0.0950257	-0.12414	-0.0598015	0.147948	0.0165316	-0.142161	0.389796	0.208255	-0.0136392	-0.149257	0.495823	-0.428681	0.102129	0.0612925	1.41284	-0.153091	-0.386833	0.183555
ABCA12	-0.260198	-0.167861	-0.127166	-0.260993	-0.307677	-0.0708216	-0.021251	-0.365943	-0.232081	-0.166998	0.0675199	0.34413	-0.127873	0.123755	-0.0579469	-0.0962156	0.0638109	-0.237952	-0.127142	-0.429666	-0.164083	-0.0991154	0.0123647	0.331284	0.17609	0.309211	0.082117	0.285548	0.0394918	-0.00213754	-0.0224796	-0.0631519	0.141697	0.212625	0.0259901	0.187611	0.0207099	-0.191529	-0.116602	-0.119381	0.0649496	-0.0208375	-0.371107	-0.285549	-0.0830715	-0.249641	-0.0608594	0.0167844	0.0473863
ABCA13	-0.201977	0.66104	-0.255402	-0.0702011	-0.114653	-0.0812073	-0.205717	-0.0911065	0.0335976	-0.0651974	-0.379969	-0.0708216	0.110002	-0.0816778	0.192267	-0.00435333	-0.00234665	-0.224012	-0.144129	-0.385523	-0.156632	-0.246419	-0.100724	-0.271064	-0.245056	-0.0277122	-0.0421926	0.00073112	-0.0325261	-0.196199	-0.055497	-0.227608	-0.232081	0.149383	0.010893	-0.009877	-0.00743915	-0.0623121	0.0299607	-0.235399	0.012384	-0.0638129	-0.329544	-0.224759	-0.207693	-0.0892142	0.0215724	0.039358	-0.238522
ABCA17P	-0.0986644	0.00190598	-0.0954376	0.210584	-0.199251	-0.0360512	0.0411131	-0.0173703	-0.00962867	0.158908	-0.241887	0.371287	-0.000178351	0.12188	-0.308823	0.000756924	0.0678705	-0.198321	0.0161989	-0.0424802	-0.530839	-0.015452	-0.0825326	-0.0339853	0.239848	-0.0420479	0.42141	0.0810042	-0.00327713	-0.230305	-0.0217814	-0.0118687	-0.00296491	0.116404	0.66879	-0.177793	0.0533587	-0.0382933	-0.0227746	0.0335976	0.360781	-0.319436	-0.0283219	0.0439721	-0.4445	-0.303892	0.0153125	0.171038	-0.192475
ABCA2	0.0412807	-0.249334	-0.00105568	-0.138865	-0.214388	-0.0911866	-0.263683	-0.188852	-0.169057	-0.0448652	-0.0283757	0.218859	0.0331289	-0.120053	0.294125	0.169349	-0.225684	0.180012	-0.0354371	-0.111538	-0.101525	0.052065	0.19911	0.149523	0.301153	0.22048	0.169211	-0.289692	0.028796	-0.248268	-0.0509218	0.0744932	-0.150206	-0.213539	0.110099	-0.0737204	-0.108451	0.147948	0.165318	0.0198974	0.149598	-0.166548	-0.273468	-0.236095	-0.150714	-0.17734	-0.0880531	-0.0498062	-0.00395343
ABCA3	-0.168511	-0.669254	-0.00788448	-0.47294	-0.251973	-0.112168	-0.191199	-0.0625135	-0.189407	-0.0174688	-0.474887	0.0683154	-0.0127771	-0.0679517	0.0031896	0.040413	-0.290684	-0.161889	-0.101981	-0.355468	-0.23662	-0.169577	0.367353	0.0877525	0.632093	0.259117	0.129385	-0.00667288	-0.172779	-0.196327	-0.038842	-0.11429	0.400279	-0.196012	0.128521	0.238669	0.182193	0.0731434	0.232729	0.195	0.32828	0.0165517	-0.267239	-0.311726	-0.11705	-0.552922	-0.036197	0.219272	-0.0967584
ABCA4	0.203628	0.264175	0.227674	-0.0532436	0.0820245	-0.0418704	-0.0861235	0.488927	0.400279	0.31205	0.176743	0.433894	0.0138882	-0.35354	0.0145337	0.361592	-0.165029	-0.207337	0.104737	-0.134063	0.396034	0.205472	0.176971	-0.153639	0.415192	-0.115163	-0.201091	-0.433719	-0.483072	-0.173822	-0.339695	0.00127146	0.31408	0.300277	0.00976657	0.114402	-0.240342	0.0256857	-0.126021	-0.0968164	0.4355	-0.0572808	-0.144066	-0.0140416	0.70372	0.0353933	0.124635	-0.101899	-0.0533062
ABCA5	-0.243236	-0.0998183	-0.0900259	0.238308	-0.457423	-0.0137476	0.17017	-0.139893	-0.229067	-0.184773	-0.209997	-0.475094	0.00852071	0.388751	-0.225308	-0.18078	0.0248861	-0.380754	-0.298367	0.462796	0.122222	0.07715	-0.103962	-0.0715862	-0.221674	0.143412	0.437603	0.447475	0.246973	0.154418	0.527345	-0.475854	-0.0290028	-0.596187	-0.18934	-0.204462	0.227851	-0.0146947	-0.0242461	-0.490354	-0.286424	-0.15934	-0.0105259	-0.221109	-0.320839	-0.323449	0.180691	0.138754	0.205667
ABCA6	-0.0756554	0.0962058	0.00911689	0.206467	0.0323967	-0.219373	-0.0939673	0.0288782	-0.163918	-0.164996	0.0505353	-0.0820796	-0.176736	-0.162138	0.192408	0.462595	-0.131704	-0.230839	-0.20747	0.0140433	-0.00498681	0.235448	-0.0568052	-0.0749718	-0.222539	0.140907	-0.0853238	0.280504	-0.237086	-0.36492	-0.0349526	0.651561	-0.118779	0.0839138	-0.0991154	0.440613	-0.204824	-0.0254069	0.032808	-0.135063	0.151137	-0.290936	-0.129279	-0.0872711	0.101638	0.559997	0.0495157	0.13883	0.0596688
ABCA7	-0.14867	-0.19357	0.0301916	-0.0608896	0.26597	-0.0737204	-0.265687	-0.216758	-0.456628	-0.386706	-0.290684	-0.115599	0.343387	-0.0248633	-0.358612	-0.262956	0.0969593	-0.122099	-0.384992	-0.301668	-0.293806	0.0222365	0.800686	0.102286	-0.693169	0.0993554	0.270261	0.322503	0.166097	-0.0275744	-0.120712	0.299161	-0.390126	-0.525671	0.197684	-0.351765	-0.244813	-0.0381752	-0.767303	0.0210495	-0.471385	0.307584	-0.219428	0.0399722	-0.533442	-0.2497	-0.405313	-0.429666	-0.46004
ABCA8	-0.0825326	0.266778	0.111318	-0.0896635	-0.0768328	0.0949167	-0.147406	0.166349	0.0407495	0.0319995	0.0912311	0.121109	0.0255072	-0.0901671	-0.174327	0.0580897	-0.149119	-0.0255097	0.048807	-0.0220435	0.0441322	-0.0219958	0.146998	-0.0637572	0.0912057	0.047732	-0.0135386	-0.0949739	-0.0617319	-0.191689	-0.0688347	-0.015727	0.155036	0.00490291	0.179609	0.0499321	0.0168896	-0.137543	0.0347564	0.138652	0.0971846	-0.0377973	0.0546842	-0.20674	0.139759	0.0981992	0.129236	-0.0262299	-0.102404
ABCA9	-0.083707	-0.154094	-0.0816504	-0.0650239	-0.0908305	-0.0388227	-0.0793183	-0.103806	-0.0415036	-0.0758401	-0.0382933	0.26597	-0.0807915	-0.0358926	0.174063	0.0664258	0.0215967	0.0352824	0.219562	-0.0860421	-0.128966	-0.0480886	0.242246	0.156955	0.178746	0.155489	-0.0771772	0.0655233	-0.04302	-0.0173703	0.022442	0.142813	0.149763	-0.00170994	0.00306021	0.0040702	0.0376765	-0.123534	0.0880949	-0.195813	0.0357222	-0.0473148	-0.0694254	-0.125314	0.119292	0.137392	-0.100105	0.0782239	-0.0715348
ABCB1	0.842737	0.52823	-0.384334	0.234678	-0.225734	0.31408	0.842737	0.102253	0.45002	0.170041	0.951344	-0.356973	0.657188	0.686319	-0.229181	0.032808	0.815845	0.859895	0.758824	0.670788	0.303163	0.942693	-0.243236	-0.210729	-0.103681	0.598423	0.658407	0.335465	0.599581	0.140455	0.246704	-0.200351	-0.0074151	0.26624	-0.189293	-0.125314	1.33765	0.458659	0.183016	-0.340775	-0.0743156	1.02167	0.804168	1.22955	0.00372117	0.116786	1.17221	1.36624	1.06706
ABCB10	0.244906	0.0741113	-0.226942	-0.174443	-0.741312	-0.203958	-0.00374895	0.156273	-0.358936	1.2426	0.327416	-0.151441	0.705953	0.489633	-0.185376	-0.227665	0.547343	0.236631	-0.167939	0.595893	0.56168	-0.273539	-0.92972	-0.00481627	-0.397692	0.273086	0.292784	0.344647	0.252911	0.538926	0.408712	-0.61604	0.173814	0.632093	-0.10387	-0.220585	0.863746	0.0857139	0.620187	-0.422688	-0.157641	0.0522632	0.0726413	-0.0181758	0.0564011	0.0269636	-0.134029	-0.31071	-0.0295342
ABCB11	-0.285113	0.0276215	0.120232	0.0217208	0.0406691	-0.0931181	-0.127435	0.147375	-0.197931	-0.0974977	0.00381992	0.126387	-0.318298	-0.212197	0.116713	0.0885534	-0.0658462	-0.128312	-0.125032	0.00384291	-0.0286158	-0.196946	0.427544	-0.218326	0.0312864	0.0141636	-0.157641	-0.125607	-0.066034	-0.0494224	0.0180578	0.00945405	-0.0219474	0.212903	-0.145932	0.191429	0.0509498	0.25693	-0.114711	-0.0363393	0.153398	-0.128936	-0.0446763	0.417384	0.0153586	0.538209	-0.0791193	0.296492	0.0961688
ABCB4	-0.333797	0.0429007	-0.245531	-0.143192	1.70353	1.30285	0.221912	0.537329	-0.0368661	0.2315	0.124845	-0.196551	-0.280028	0.146259	0.173557	0.137921	-0.030305	-0.115226	0.171547	0.0822605	0.210325	0.595893	-0.0928648	0.333185	0.166097	0.401358	0.249712	-0.28038	-0.0241446	0.652826	0.354853	-0.0284757	-0.00563461	0.603882	-0.0724751	-0.126392	0.40233	-0.00788448	0.0377882	-0.0789557	0.00065492	0.302325	0.124845	0.216416	0.425118	0.214412	0.133168	0.152275	0.574413
ABCB5	0.0825095	-0.0174216	0.402641	0.0961688	0.417936	0.262493	0.0147673	0.14016	0.227232	0.0187461	0.269548	0.142177	0.0850808	-0.01911	-0.0582037	0.080029	0.064226	0.0266525	-0.0849732	-0.0413153	0.161114	0.0671308	0.108235	-0.0909396	0.0197685	-0.202173	-0.117255	-0.328877	-0.187334	0.0578438	-0.181397	0.0775648	0.135695	0.068755	0.277167	0.113878	-0.0547003	-0.0894846	-0.167895	0.108655	0.236528	-0.15886	0.0213646	0.0426732	0.1349	0.324516	0.103655	0.0120025	-0.0473363
ABCB6	-0.202753	-0.297958	0.0985833	-0.0779261	-0.112566	-0.328206	-0.440975	-0.107561	-0.191992	-0.268359	-0.535521	-0.248055	-0.390255	-0.0184993	0.209323	0.296112	-0.210949	-0.111911	-0.414575	-0.504837	-0.264882	-0.0281442	0.377726	0.0822031	0.448752	-0.261117	-0.251909	-0.29076	-0.216809	-0.158749	-0.0120372	0.101831	-0.0255725	0.103449	0.45448	0.653825	-0.148376	0.419528	0.128995	0.064457	0.416574	0.0421071	-0.0972325	-0.31281	-0.0601558	-0.438526	-0.233085	0.203302	0.0622557
ABCB7	-0.0176374	-0.164161	-0.159913	-0.265764	-0.314079	-0.332108	-0.0953448	-0.318877	-0.594488	0.217882	-0.386218	-0.308036	-0.0330228	0.268999	-0.0663996	-0.200825	0.0290553	0.0286039	0.0253117	0.126288	-0.261238	-0.175092	-0.214939	-0.131602	-0.143461	0.0381851	0.378764	0.0912057	0.348374	0.247438	0.390994	-0.413914	-0.172588	0.242421	-0.483308	-0.337115	0.350336	0.0734378	0.539251	-0.543832	-0.32837	-0.0607867	0.0130849	0.00788834	-0.401756	-0.0595461	0.0871536	0.397692	0.315317
ABCB8	-0.122408	0.0899065	0.153483	-0.329245	0.0757715	-0.258078	0.090495	-0.135989	-0.270407	0.047704	-0.0702833	0.211779	0.103008	-0.0282181	-0.026398	-0.0989292	-0.203459	0.0566418	-0.0916349	-0.15458	0.102253	0.0991684	0.0968995	-0.302596	0.23212	-0.43651	0.0283036	-0.104994	-0.014272	0.0214223	-0.214334	-0.0629835	-0.0856988	-0.16383	-0.110231	-0.0937541	-0.0545748	-0.141044	-0.0538029	0.0975329	0.218739	-0.0749433	-0.0270958	0.0115229	0.257688	0.00583591	-0.0687329	-0.0302349	-0.209551
ABCB9	-0.101351	0.275595	-0.00544807	-0.166548	0.110037	-0.21404	-0.00730837	0.0196388	-0.0866443	0.0156709	-0.184957	0.386869	-0.409863	0.0835615	0.137113	0.459618	-0.344654	-0.00905362	0.0939614	0.114158	-0.169167	0.171748	-0.0460139	-0.2632	0.511928	-0.20101	-0.0539861	-0.163673	-0.289132	0.0445468	-0.105104	0.176208	0.104397	0.118946	-0.0245094	0.532822	-0.175864	0.0960776	0.219516	0.24045	0.337012	-0.432202	0.0171643	-0.218283	0.0469383	-0.102007	-0.054679	-0.0738694	-0.0860661
ABCC1	0.0514247	-0.155453	-0.335218	0.0519745	0.0345195	0.0521721	-0.109386	-0.194863	0.0639735	-0.254194	0.155527	-0.167606	0.121773	0.381447	0.185441	-0.0964848	0.0884957	0.0909482	0.135813	0.239506	0.120435	-0.116231	0.0787342	0.486777	-0.0728447	0.125447	0.179491	0.868062	0.203666	0.337104	0.164749	0.133851	-0.0144199	0.37887	0.0456164	0.163361	0.144851	0.175859	0.126926	0.207164	-0.132238	0.352274	0.253259	0.299795	-0.0893322	0.148958	0.424321	0.523504	0.368197
ABCC10	0.0893444	-0.144658	0.0456403	-0.0322434	0.216366	-0.0363158	0.217618	-0.173776	0.214514	-0.252923	0.143038	-0.0983929	0.0920632	0.183947	0.0252085	-0.34391	0.351766	0.212325	0.568005	0.0973102	0.0806686	0.0418904	-0.102122	-0.0732807	-0.186565	-0.0527904	0.0467358	0.154201	0.356248	0.0903085	0.099796	-0.0639296	-0.510194	0.00593689	-0.329245	-0.204772	0.0720768	0.00536148	-0.340095	-0.0221128	-0.255	0.331547	0.163676	-0.108249	0.00885745	0.105696	-0.128786	-0.205756	-0.154645
ABCC11	-0.00123913	0.109432	0.36725	0.182061	0.226505	0.235012	0.275395	0.369875	0.372237	0.249396	0.262744	0.437021	0.247786	-0.328206	0.342946	0.177771	0.000705828	0.161828	-0.0633323	0.0761824	0.0705117	0.130449	0.0991044	-0.300577	0.153516	-0.229418	-0.127202	-0.0672573	-0.181694	-0.154367	-0.261498	0.194059	-0.00957348	-0.0260065	0.287948	0.270007	0.0661161	-0.368537	0.0381072	0.183475	0.216366	0.00707774	-0.174056	-0.174703	0.137839	-0.0916965	0.134322	-0.219428	-0.335893
ABCC12	0.194354	0.125169	-0.036368	0.0236216	-0.0508435	0.158944	-0.00103274	0.194446	0.194059	0.0457961	0.261619	0.0257613	0.406659	-0.0823528	-0.260143	-0.0420714	-0.0514407	0.117807	-0.209373	0.0352045	0.164662	0.00549889	0.164783	-0.229987	0.0540342	-0.262883	-0.125672	-0.450629	0.0490756	-0.207693	-0.0100923	0.0123647	-0.131987	0.0329933	0.138784	0.0452235	0.130798	-0.391911	-0.250697	-0.169978	-0.0511504	0.17326	0.42793	-0.0497078	-0.0546256	0.0849261	0.021994	-0.0114691	-0.124368
ABCC13	-0.264682	-0.0758157	-0.340192	-0.432032	-0.199909	-0.628546	-0.824814	0.342669	-0.140643	1.33059	-0.406712	0.0116463	-0.672508	-0.59566	-0.254522	0.92252	-0.354729	1.24762	-0.690305	-0.270543	-0.194947	-0.352533	0.297396	-0.336614	0.942693	0.440233	-0.387726	-0.457031	-0.851918	0.307054	-0.0531958	0.412575	1.39528	-0.0116678	-0.102861	0.124989	0.34188	0.642689	1.19605	-0.0600696	1.22955	-0.926476	-0.625481	-0.410948	0.235783	-0.531806	-0.263487	-0.192475	-0.414954
ABCC2	-0.0350768	0.148117	0.349158	-0.314547	0.411117	-0.391499	0.0261746	0.333185	0.0919037	-0.264943	0.0536511	0.0104913	-0.039713	0.103655	0.0168359	0.169889	-0.115085	0.30062	-0.306141	0.000599188	-0.821926	-0.443632	-0.191566	-0.0495009	0.462422	-0.0443445	-0.0153084	-0.202119	0.0250165	0.220122	-0.383936	-0.0629317	0.10683	-0.29076	-0.125994	0.632093	-0.202517	0.0387475	0.189178	0.920713	0.197046	0.133985	0.152755	-0.191284	0.433894	0.957684	0.122749	-0.141915	-0.216385
ABCC3	-0.195578	-0.0553782	0.271082	-0.093864	0.000517789	-0.3176	-0.150176	-0.209816	-0.0346917	0.0988998	-0.0653985	0.190204	-0.108154	-0.372073	0.0887088	0.545685	-0.0196565	-0.157641	-0.045735	-0.252738	-0.450983	-0.0339417	0.262552	-0.013202	0.351976	0.0160199	-0.235588	-0.302967	-0.75351	-0.0789557	0.0385022	0.0117772	-0.0107854	0.126387	0.12659	0.0626949	0.103725	-0.281861	0.126132	0.437798	0.167533	-0.220279	-0.4351	-0.153815	0.256194	0.0711595	-0.177709	-0.0765533	-0.250212
ABCC4	0.0103351	0.264639	0.595459	-0.233144	-0.164161	-0.18337	0.288573	-0.155834	0.0171136	0.116226	0.089678	0.232278	-0.0569311	0.0678095	0.118404	0.81154	-0.00895142	1.0158	-0.0350553	0.127971	0.0569803	-0.208525	-0.175277	-0.140718	0.338178	-0.205046	-0.0954376	-0.128846	0.0116237	-0.0830967	-0.103806	0.12727	0.175015	0.0528421	-0.0461856	0.0677779	0.133816	0.172219	0.151865	0.14946	0.37887	-0.190528	-0.13927	-0.300941	-0.215533	-0.195402	-0.157031	-0.0522746	-0.0270958
ABCC5	-0.255926	0.494417	0.132251	0.40713	0.351766	0.108064	-0.0106133	-0.0568859	0.146998	0.265653	-0.0585418	-0.0728177	-0.21548	0.133008	-0.149182	-0.0950888	0.352379	0.308018	0.216993	0.148117	0.368762	-0.113669	-0.0693091	0.814558	-0.177793	0.233097	0.0518215	0.192408	-0.0137703	0.247618	-0.062023	0.0544948	-0.0497536	-0.324797	-0.33874	-0.0681726	0.280029	-0.000359295	0.033018	-0.4351	-0.261864	-0.151356	0.15332	0.196325	0.555103	-0.319242	-0.264231	-0.514224	-0.47762
ABCC6P1	0.0667765	-0.0693091	-0.0963903	0.153398	-0.22338	0.0169369	0.0961688	-0.177833	0.419899	-0.159157	0.135435	0.168274	-0.290071	-0.0117364	0.00593689	-0.0526587	0.123865	0.000303062	-0.355347	0.199719	-0.0198729	0.217271	0.979779	-0.350941	-0.185332	0.027747	0.0203988	0.0568171	-0.274893	0.013688	-0.152199	-0.0854113	-0.230254	0.0143787	-0.0195069	-0.214482	0.0634842	-0.210378	-0.441162	0.349721	-0.187414	-0.124672	0.05776	-0.233869	-0.148376	0.251691	-0.034313	-0.0637319	-0.0545539
ABCC8	-0.201091	-0.379221	0.183204	0.168892	-0.266619	-0.0701431	-0.0775427	0.24415	0.164186	0.323414	0.021861	0.242246	-0.0618881	-0.335501	0.315579	0.171214	-0.164924	0.16848	-0.192146	-0.0281177	0.0877766	0.397508	0.135933	-0.375682	0.00444254	-0.370241	-0.572489	-0.51599	-0.160996	-0.213004	-0.467545	-0.188295	0.417543	0.14124	0.403324	0.526251	-0.520423	-0.052064	0.36596	0.305211	0.210025	-0.252688	-0.181733	-0.0356295	0.319707	-0.0236439	0.0697539	-0.300074	-0.0348164
ABCC9	-0.11899	0.109708	0.0483676	0.0902796	-0.123837	0.0694093	-0.099425	-0.0507305	0.142883	0.0115763	-0.0817594	0.0158639	0.0296722	-0.146991	-0.132018	0.0470211	-0.239429	0.125352	-0.0923556	-0.0694547	-0.0234903	0.145115	0.092695	0.0525199	0.157451	-0.000956499	0.00516914	0.0754779	-0.00669842	-0.306221	-0.153884	0.10736	0.233768	-0.142812	-0.09818	0.0174518	-0.0884916	-0.185415	-0.00511119	0.166006	0.00952736	-0.234187	-0.190368	0.0529068	-0.0818326	-0.0362939	0.0301281	-0.045375	0.0162549
ABCD1	0.544605	0.16627	-0.160575	-0.154645	0.471971	0.0885191	0.263047	-0.164356	0.459809	0.166307	0.187924	-0.00772725	-0.195322	-0.303646	-0.0442122	0.187566	-0.0466792	-0.209551	0.248898	0.151746	-0.0975803	0.115695	0.235059	0.160242	-0.219626	-0.389709	-0.159536	-0.468231	0.00109965	-0.395531	-0.203023	0.274052	-0.368537	-0.172817	-0.0177123	0.295931	-0.541436	-0.148626	-0.114905	-0.142024	0.112749	0.110728	-0.066034	-0.220072	-0.0454622	0.0617571	0.256635	0.0116237	0.020816
ABCD2	-0.0777892	0.0560585	-0.250574	-0.178426	0.0172673	0.0909226	0.627202	0.0545472	0.248532	0.363248	0.168229	0.0491334	-0.0600119	0.674771	-0.246419	-0.0792869	-0.0335028	0.430531	0.165965	0.693074	0.509753	-0.0792296	0.0767619	-0.115637	-0.0333856	0.0651153	0.100173	0.673267	0.220601	0.112817	0.180145	-0.24207	-0.113613	-0.154443	0.497544	0.0333898	0.326278	0.0123647	0.432364	-0.0100401	-0.0444788	-0.0383182	1.11605	0.418891	-0.120516	-0.106763	-0.163252	-0.38862	-0.136566
ABCD3	0.122916	0.143447	-0.157763	-0.0317537	-0.404436	0.165405	0.272706	-0.0895742	-0.144244	-0.0472677	0.168937	-0.209193	0.361097	0.321898	-0.0677863	-0.333889	0.535395	-0.0819738	0.261556	0.331395	0.564772	0.049873	-0.214801	-0.161634	-0.679744	0.392414	0.345107	0.142813	0.262878	0.361411	0.444874	-0.192888	0.0101888	0.325991	0.119618	-0.270985	0.18198	0.181792	0.115695	-0.339216	-0.129484	0.171038	0.0813124	0.232897	0.322227	-0.0986644	-0.0746866	-0.100724	0.198101
ABCD4	-0.00283659	0.244795	0.0895154	0.0235706	0.205369	0.0443583	0.205278	0.404327	-0.0463866	0.353163	0.0957216	0.00504947	0.356472	0.0250917	0.146361	0.000115046	-0.0264679	0.237164	0.360549	0.156037	0.172305	0.363036	-0.0285211	-0.0675607	0.0238907	-0.101797	-0.118872	-0.190402	-0.0533616	-0.10623	-0.0579151	0.224237	0.0401042	0.0735635	0.0156931	-0.135954	-0.206112	-0.147598	0.181888	-0.0252562	0.116619	0.255085	0.0444748	-0.152716	0.301299	-0.0605224	0.166006	-0.057523	-0.0626485
ABCE1	0.415793	-0.0483245	-0.185575	0.0182847	-0.0756864	-0.00211516	0.53344	0.140455	-0.14309	0.361509	0.299883	-0.159913	0.707632	0.905571	-0.539032	-0.0911605	0.569685	0.0767619	0.160814	0.454947	0.539251	-0.13593	-0.505885	-0.254128	-0.256822	0.240814	0.522695	0.616351	0.441294	0.984956	0.670184	-0.59019	0.155892	0.1283	0.102758	-0.225573	0.829865	0.563445	0.714871	-0.788851	-0.281115	-3.74e-06	0.361097	0.0226699	-0.282549	-0.300941	0.143352	-0.0273987	0.359967
ABCF1	0.24415	-0.113588	-0.175909	-0.0701129	0.053692	0.0247836	0.200525	0.0668022	-0.155134	-0.26225	-0.0325519	-0.216809	0.0764185	0.270752	-0.175771	-0.0995456	-0.0960857	0.147104	0.294932	0.264496	-0.0866443	0.0123334	-0.083321	0.186056	-0.500645	-0.0526856	0.073966	0.270417	0.428859	0.252089	0.278344	0.0549622	-0.0341995	-0.0159301	0.197297	-0.15096	0.146837	0.134942	-0.167532	0.0891363	-0.0213166	0.303328	0.0999776	0.148669	-0.111538	0.172087	-0.150069	0.0222593	0.334997
ABCF2	0.0136535	0.0527803	-0.0233541	-0.165324	0.180345	-0.0754766	0.256565	0.0482347	-0.0219474	0.0583	-0.00294414	-0.0783268	0.0226946	0.19175	0.100307	-0.1458	-0.067922	-0.00454363	0.378629	-0.0555236	0.127893	0.145277	0.0730013	0.238723	-0.035686	0.156827	-0.00301716	0.0432401	0.213007	-0.00345637	0.0610191	0.0465717	-0.121362	0.101731	0.237991	0.00586053	0.110695	0.0203988	-0.131949	-0.103929	-0.00489702	0.229237	0.170243	0.11295	0.0852412	-0.0687587	-0.0291328	-0.205561	0.0557679
ABCF3	0.0238599	-0.130353	0.14841	0.0297011	0.311437	0.0242868	0.05406	-0.0528718	-0.180819	-0.340775	-0.213484	-0.0505385	0.101831	0.0645534	0.0138655	-0.458226	-0.089515	0.0204484	0.159823	0.0488859	0.0478914	0.380458	0.21897	0.284486	-0.0774349	0.24385	0.141856	0.231628	0.165492	0.123755	0.144673	-0.00667288	0.0487192	0.114297	0.00170596	0.140033	0.154947	0.00578559	-0.215748	-0.221957	0.0310078	0.233326	0.185917	-0.0226209	0.0801934	0.191614	-0.0683983	0.200872	0.07162
ABCG1	0.381309	0.253443	-0.475357	0.288655	-0.0190105	-0.173066	-0.302596	-0.600693	-0.0789557	-1.10309	-1.09602	-0.781268	-0.124899	-0.253695	-0.148005	-0.525134	-0.128966	-0.234289	-0.356636	-0.0361715	-0.122165	-0.188171	-0.177905	0.151983	-0.0053818	-0.169057	-0.0893003	-0.36307	0.100606	-0.037963	-0.154443	-0.209639	-1.27678	-0.975442	-0.396795	0.190835	-0.951082	-0.512725	-1.07697	-0.180504	-0.716711	0.0430655	0.0768889	-0.0520915	-0.409313	-0.75125	-0.00703135	0.351976	0.29029
ABCG2	-0.0815589	-0.0687804	-0.118556	-0.189709	-0.449396	-0.0364244	-0.146629	0.0381072	-0.231106	1.21331	-0.60026	-0.183502	0.471589	0.0113065	-0.0953448	0.0356643	-0.0447339	0.66667	0.224719	-0.422688	-0.372073	0.132328	-0.201184	-0.468045	0.325162	0.0339556	-0.222496	-0.178705	0.0768889	0.213133	-0.124931	0.0847959	0.759834	1.34781	-0.3782	-0.563064	0.457637	0.650439	-0.185948	0.866765	1.45295	-0.305751	-0.51599	-0.401604	0.0122074	0.0877134	0.0119547	-0.251116	0.211961
ABCG4	-0.156597	0.0758375	-0.00224097	-0.198691	-0.140044	-0.380473	0.270417	-0.229009	-0.0881697	0.175859	-0.423037	0.113878	-0.227504	-0.192775	0.16178	0.749994	-0.255626	-0.333889	-0.235821	-0.629769	-0.520099	-0.140005	0.220745	-0.150922	0.401751	-0.0284494	-0.216566	-0.257268	-0.362063	0.0820245	-0.811675	-0.194521	0.0955711	-0.389965	0.167392	0.241429	-0.0647597	0.0310366	0.466574	0.146756	0.463185	-0.264166	-0.372186	-0.457423	0.163186	-0.359806	0.138365	0.000115046	0.055193
ABCG5	0.0208719	0.541474	0.0279358	0.244286	0.27617	0.0888829	-0.170616	0.105261	0.227171	0.281546	0.157249	0.137318	0.0294655	-0.0545748	0.315657	0.228524	-0.0452577	-0.226302	0.142435	-0.284216	0.182745	-0.123084	1.0297	-0.010807	0.149149	-0.60781	0.253004	-0.0659763	-0.219373	0.160545	-0.0420959	0.00559507	-0.15995	0.407521	-0.137399	-0.0778159	-0.211936	0.0576284	-0.28616	0.40571	0.58601	-0.0497286	-0.292777	-0.226302	-0.118961	-0.158	-0.0949507	0.177982	-0.0181535
ABCG8	0.175555	0.0474145	0.146563	0.00386588	0.0951714	-0.179165	-0.314143	0.400684	-0.0715862	0.372602	0.182659	0.667399	-0.23004	-0.227251	0.249647	0.221138	-0.325203	0.0922615	-0.234039	0.0438941	-0.0142946	-0.0190853	-0.0971399	0.0130429	0.989792	-0.318877	-0.280997	-0.352296	-0.171231	-0.13587	-0.148218	0.33101	0.626582	0.0522632	0.219148	0.326725	-0.0175773	-0.303122	0.0656645	0.452498	0.687045	-0.0345026	0.0253662	0.12942	0.183652	-0.0750814	-0.0178628	0.0599408	-0.0414522
ABHD1	0.210684	-0.107928	-0.156217	0.213705	0.143319	-0.00598705	0.00404796	0.276837	-0.00224097	0.0875577	0.325726	0.400684	0.0862199	-0.155412	-0.0215981	0.0894035	-0.162344	0.0132567	0.0913223	-0.0631519	-0.00320212	0.0591592	0.0918371	0.29076	0.0486316	-0.082974	-0.0236975	-0.0708558	-0.102057	-0.0418704	-0.233022	0.331395	0.0986833	0.235838	0.225024	0.156408	-0.0436229	0.00854421	0.0444442	0.0663598	0.0253117	0.0788026	-0.112491	0.0486316	0.265413	-0.207781	0.142476	-0.118129	-0.214131
ABHD10	0.316004	-0.148909	-0.124198	-0.27806	-0.169362	0.0355026	0.109943	0.193784	-0.112566	-0.0180779	-0.0514407	-0.127693	0.462241	0.161078	-0.122129	-0.0281442	0.0736826	-0.0970494	-0.133666	-0.389599	0.113684	-0.226979	-0.159502	-0.0880223	0.107726	0.579817	0.3311	0.0788345	0.260471	0.445707	0.597106	-0.240774	0.151546	0.459809	-0.0681422	-0.0272585	0.306911	0.246465	0.427758	-0.186122	-0.115343	0.122574	0.390242	-0.0604445	-0.351158	-0.00544807	-0.22423	0.196143	-0.143323
ABHD11	-0.0820559	-0.410826	0.00109965	-0.0415554	0.0142565	-0.33137	-0.155107	-0.0354122	-0.0662605	0.0461678	-0.106446	0.0745453	-0.246206	-0.2438	-0.0571218	0.239848	-0.220366	0.00580922	0.0715846	0.210584	-0.00294414	0.0600008	0.279896	0.164783	0.0930404	0.0906153	-0.379354	-0.388137	-0.00879586	0.0180377	-0.244432	-0.184773	-0.100904	0.142851	0.127232	0.251637	-0.172547	-0.0675261	-0.172588	0.235164	0.157895	0.0213159	-0.524821	-0.144362	0.122916	0.0397493	-0.0670304	0.021861	-0.0684197
ABHD12	0.16577	-0.0170548	-0.0397872	-0.147341	0.0561336	-0.12015	0.122189	-0.215216	-0.250505	-0.048932	-0.232299	0.00267234	-0.0868748	0.120204	0.0777105	-0.139035	-0.0471731	-0.285321	0.0298634	0.104296	0.32636	0.00361372	0.0220429	0.0262252	-0.0860942	-0.0899045	-0.0317537	0.177332	0.0223858	0.0817203	0.141453	-0.242877	0.0535015	0.0199972	0.11051	-0.109478	0.0757447	-0.0863512	-0.177536	0.12815	-0.0808282	0.083533	-0.0321494	0.0259423	0.133008	-0.179535	0.0192036	0.193432	0.188245
ABHD12B	-0.082506	-0.0144199	0.220805	0.205515	-0.234705	0.229187	-0.177381	-0.081029	-0.17695	-0.0509218	-0.135263	-0.079004	-0.0295571	-0.0231902	-0.125907	0.00470538	0.0320612	0.021889	-0.105723	-0.158187	0.156177	-0.0273477	0.0885534	0.195314	0.0281502	0.0895734	0.0280444	0.0200795	-0.0205426	0.0377882	0.0329089	-0.175952	0.34413	-0.0152907	-0.144693	-0.0724177	0.11763	-0.188805	0.211364	0.209776	0.0853578	-0.128048	0.0524386	0.0212006	-0.00511119	-0.159874	-0.0739864	-0.0407689	0.0763546
ABHD13	0.351391	0.310483	0.281075	0.589533	-0.346912	0.075535	0.149999	0.0512349	-0.0115976	0.346464	0.537613	-0.259071	1.19605	0.243023	0.785581	-0.0222399	1.08897	-0.229634	-0.0701431	0.241891	1.00526	0.0548729	-0.393571	0.110002	-0.102495	-0.035008	0.350047	0.226033	0.215208	0.189418	0.252269	-0.331293	-0.0679517	0.134978	-0.498785	-0.279769	0.352676	-0.143389	0.164835	-0.404302	-0.211936	0.0917996	0.360251	0.324772	-0.328715	-0.0190105	0.348478	0.230492	0.472199
ABHD14A	0.229933	-0.216025	-0.231444	-0.166918	0.187394	-0.0864456	0.180269	-0.16548	-0.134992	-0.0169332	-0.0811174	-0.109756	0.322962	0.233768	-0.0278396	-0.144928	0.0583234	0.179166	0.262744	0.401751	0.0170538	-0.023212	0.0583	0.191793	0.0574058	0.036347	0.164449	0.156483	0.284722	0.179219	0.153911	0.0536511	-0.175737	-0.0581477	-0.0568598	0.115004	0.11097	0.120901	0.0659624	0.0626949	-0.259951	0.551712	0.223712	-0.0509466	0.0679692	-0.0704305	-0.354999	-0.192186	-0.171975
ABHD14B	0.682833	-0.139102	-0.253748	-0.0325519	0.303863	0.349836	0.709018	0.00447179	0.287484	-0.0599347	0.278415	0.144851	0.188462	0.376526	-0.464887	-0.743541	0.278483	-0.00481627	0.158869	0.17017	0.38168	0.047653	0.0982269	0.564132	-0.121961	-0.27517	0.313051	0.479932	0.858387	0.403885	0.306252	-0.402245	-0.104776	-0.351351	0.724889	-0.505333	0.1359	-0.146596	0.19323	-0.271462	-0.24872	0.299384	0.404572	0.180098	-0.158824	0.160597	-0.234705	0.0637769	0.170875
ABHD15	0.617846	-0.0422178	-0.529629	0.202307	-0.0886803	0.530392	0.165725	-0.123701	0.0578438	0.213337	0.162715	-0.121294	0.00458203	0.479932	-0.139753	-0.145194	0.102981	-0.122469	0.507954	0.10283	0.213337	0.359096	-0.109809	-0.0302804	-0.276876	0.211274	0.411679	0.132686	0.789095	0.204857	0.361968	-0.0241446	0.00586053	-0.0825894	0.181454	0.112197	0.430531	0.160726	-0.0316319	-0.183613	-0.198277	0.832342	0.14826	0.595459	0.190876	0.487498	0.130702	0.610011	0.462796
ABHD16A	-0.444892	-0.067922	0.114047	-0.178264	-0.325041	-0.442615	-0.440189	-0.500396	-0.509617	-0.214388	-0.577954	-0.0779537	-0.0935225	-0.128218	-0.0493167	0.0488562	-0.35883	-0.201475	-0.550556	-0.273107	-0.253695	-0.223433	-0.0419444	0.318823	0.258869	0.144745	-0.0661446	-0.0256611	-0.199738	-0.230419	-0.0483927	-0.0511504	-0.132984	-0.16074	-0.525671	-0.039841	0.0826286	0.227287	0.011979	-0.00995006	-0.0929284	-0.294051	-0.0594779	-0.0629609	-0.195237	-0.0857795	-0.286501	0.23557	0.107141
ABHD16B	-0.686677	0.00927295	0.183789	-0.0164356	-0.341213	-0.266337	-0.469424	-0.217749	-0.353315	0.323131	-0.24469	0.186815	-0.597384	-0.559414	0.165141	0.579058	-0.660931	0.350259	-0.435591	-0.266619	-0.571246	-0.306141	0.525245	-0.0549331	0.224558	0.0598487	-0.337415	0.0219134	-0.437228	-0.141762	-0.305336	0.0831677	0.364899	0.214747	-0.144541	0.139909	-0.0469056	-0.0140416	0.0634364	0.0293784	0.809518	-0.292518	-0.348249	-0.207518	0.0802495	-0.481678	0.105132	0.0166783	-0.134131
ABHD17A	-0.098146	-0.315994	-0.220319	-0.217842	-0.320765	-0.129516	-0.242837	-0.163551	-0.318979	-0.273794	-0.170932	-0.266279	0.117092	0.24039	-0.171586	-0.2817	0.0596688	-0.18418	0.176321	-0.042822	0.100843	-0.196642	-0.0397872	0.266636	-0.245173	0.334392	0.35844	0.232897	0.0571829	0.138547	0.226562	-0.28452	-0.301897	-0.126021	0.0361409	-0.0734667	0.0939614	0.00065492	0.223383	-0.350299	-0.276759	0.188793	0.0155373	-0.162969	-0.384334	-0.260562	-0.242992	0.398811	0.125991
ABHD17B	0.219996	0.140231	0.197297	0.165637	0.110445	0.142096	-0.159077	0.109097	-0.103598	0.138401	0.143717	0.188376	0.0857756	0.0112016	0.059361	0.0368805	-0.0660035	0.145716	0.190249	0.388545	0.0581769	0.176521	0.054577	0.0317812	-0.0612018	-0.0700887	0.0669227	0.0572269	0.0669227	0.125621	-0.0391495	-0.18373	-0.218614	-0.00103274	0.319944	0.0157483	0.115101	-0.0714163	0.0785283	0.105361	0.124162	0.041868	-0.0418193	0.0940209	0.0298866	-0.137613	0.39578	0.143717	0.369759
ABHD17C	0.52094	0.384964	0.776055	-0.280146	-0.265347	0.639559	0.183426	0.422853	0.0842488	-0.288238	0.484314	-0.042822	0.293968	-0.153954	-0.116231	-0.296616	-0.314079	0.744446	0.144636	0.0178122	-0.0980517	-0.0294605	-0.239998	-0.619887	-0.292849	-0.245781	-0.496742	0.752259	0.201789	1.22413	0.208104	-0.0110577	0.230978	0.339306	-0.488859	0.154592	0.0313582	0.17428	-0.117471	-0.28436	0.0594516	-0.133169	-0.75351	-0.655062	0.478495	-0.246658	0.110037	0.0242609	-0.182849
ABHD18	0.168732	0.0601749	-0.239201	-0.0110577	-0.00700678	0.0924272	0.0470211	-0.0417364	-0.0626807	-0.108735	-0.057225	-0.412731	0.253259	0.203666	-0.387726	-0.453211	0.068755	-0.0904929	0.163402	0.271024	0.198282	-0.00456837	-0.430004	-0.122165	-0.378462	-0.126362	-0.00276031	0.188883	0.065698	0.162439	0.0971846	-0.151794	-0.343711	-0.037963	-0.239866	-0.250452	0.164186	0.113844	-0.163875	0.0571539	-0.247487	0.0712937	0.132939	-0.0736052	-0.251525	-0.239998	0.271726	0.0322018	0.147725
ABHD2	0.490345	0.476536	0.56168	0.547824	0.135933	0.579058	0.101415	0.244542	0.367498	-0.360153	0.186286	0.159374	1.09339	0.114871	1.27884	-0.15995	0.315153	-0.0609965	0.0667496	0.417237	0.46017	0.463583	0.00536148	0.146451	-0.103387	0.696609	-0.197333	0.346685	0.0316726	0.27933	0.150782	0.522695	-0.553287	0.133086	-0.11402	0.122189	0.0481632	0.499236	-0.416421	0.814558	0.111894	0.660482	-0.297349	0.987328	0.0277347	0.700801	0.110445	0.146072	0.132551
ABHD3	0.103197	1.12884	1.38733	0.866765	-0.0209637	0.446897	0.333005	0.408274	0.234517	0.470595	0.583656	-0.0987297	0.357341	0.122574	0.0412807	-0.0110371	0.424013	0.122427	-0.221327	0.225791	0.315837	0.670184	-0.278565	0.192897	0.174007	0.183912	0.317461	0.280094	-0.0493401	0.213007	0.1283	0.220745	-0.10433	-0.0175773	-0.523987	0.0441322	0.387636	-0.278505	0.486072	-0.0857239	-0.459399	-0.117197	0.459809	0.302986	0.394601	-0.0573428	-0.00527502	-0.218145	-0.312466
ABHD4	0.0635623	0.161331	0.297534	-0.0962966	0.262552	0.0320919	-0.0595461	-0.0588385	0.203628	0.0101661	-0.0479711	0.244542	0.164502	-0.127601	0.104422	0.126632	0.124635	0.124535	0.0475412	-0.0652313	-0.0787365	0.410108	0.265218	0.150155	0.300496	0.143807	-0.434934	-0.219573	-0.318796	-0.441593	-0.332004	-0.074788	-0.30341	0.0881609	-0.108287	0.320276	-0.148834	0.0265362	0.0427925	-0.0666956	0.0657795	-0.174163	-0.0580265	0.0643791	-0.00254589	0.329467	-0.130183	0.0372156	-0.414079
ABHD5	-0.0942264	0.758824	0.408416	1.08301	-0.123794	0.44166	-0.210332	-0.0902652	0.622866	-0.267396	0.0225403	0.0907916	0.361867	-0.226451	0.273984	-0.0272349	0.470196	-0.247999	-0.0892738	0.362164	0.364532	0.501459	-0.13557	0.519134	0.0231893	0.844246	-0.195974	0.231167	0.0181594	0.00866827	-0.0213678	0.319707	-0.0505913	-0.466049	-0.42612	0.269393	0.0685685	-0.0419672	-0.134917	-0.168433	-0.193923	-0.183173	0.561362	0.944621	0.331891	0.523758	-0.572489	-0.448463	-0.916977
ABHD6	0.125308	-0.0106413	0.104737	-0.148868	-0.177455	-0.0126689	0.0584624	0.0415768	-0.00843003	-0.177171	-0.067361	0.0237316	0.122084	0.107688	0.395248	-0.00372753	0.119688	-0.019466	0.140079	0.160003	0.00536148	-0.0124341	-0.0242461	0.0266259	0.0163513	0.278736	0.0254561	0.136969	0.0377008	0.2315	0.19505	-0.0865855	-0.128218	0.481912	-0.0499082	0.0270112	0.201137	0.148711	0.515604	0.0298634	0.0740814	0.245902	0.05962	0.17095	0.380345	0.0282012	-0.227548	-0.265287	-0.102297
ABHD8	-0.102495	-0.454058	-0.262761	-0.285249	-0.229935	-0.226042	-0.321703	-0.0510477	-0.00403719	0.351145	-0.184581	0.0339795	-0.267777	-0.0404248	-0.125875	-0.0785229	-0.415271	-0.359601	-0.237685	-0.132884	-0.484485	-0.10654	0.168187	0.312872	0.140837	-0.00565747	0.0341989	0.253203	-0.0382215	-0.111507	-0.0600347	-0.123378	0.00982203	0.293103	1.11141	0.151083	-0.174362	-0.205756	0.00569206	-0.00257881	0.00730341	0.0370764	-0.469424	-0.0770941	0.111986	0.278816	-0.341526	0.0572583	-0.353759
ABI1	-0.0481906	0.332704	0.124491	0.333473	-0.249401	0.0801401	0.15327	0.00528318	-0.0322197	-0.101876	0.0708335	-0.144474	0.330842	0.10786	-0.0455378	-0.160254	0.0651153	-0.218205	-0.0822295	0.190372	0.140993	-0.0556327	-0.345595	-0.0877102	-0.155496	0.194926	0.0733231	0.114803	0.108156	0.0585198	0.0935088	-0.0547708	-0.208611	0.0793366	-0.260675	-0.116411	0.122916	-0.0275477	0.188793	-0.181363	-0.0554217	-0.100046	0.250728	0.0190902	-0.0726106	-0.0317058	-0.046659	-0.0486804	0.18149
ABI2	0.269393	0.0510904	0.218739	0.116922	0.191108	0.179166	0.0844434	0.135435	0.122498	-0.0332625	0.251158	0.0970823	0.0449325	0.110541	0.115073	-0.0301341	0.0269079	0.154661	0.188649	0.207014	0.162789	0.178524	0.0886752	-0.111967	0.139361	-0.190528	0.0727544	0.128459	0.0392954	0.0857139	0.030106	-0.0109052	0.0201848	-0.0938904	0.186102	-0.0568052	0.0249646	0.063999	0.10094	-0.106612	-0.0274503	0.0864903	0.119653	0.0867333	0.0901129	-0.100929	-0.00358746	0.079137	-0.00281191
ABI3	0.101831	-0.506382	0.0355266	-0.268359	-0.462386	-0.521783	-0.614961	-0.330301	-0.30849	-0.144888	0.00793872	0.0255785	-0.238106	-0.0667205	0.19147	0.13395	-0.152085	0.172561	0.247841	-0.098237	-0.248992	-0.270161	0.082117	0.0212006	0.0828208	0.319506	-0.0569606	-0.696582	0.0438399	0.0450955	0.240995	0.167345	-0.182612	0.170875	-0.107696	0.0511221	-0.145545	-0.0152209	-0.298599	0.260396	0.0509193	0.100237	-0.220453	-0.248661	0.28629	0.190521	-0.246419	-0.175277	0.0753988
ABI3BP	0.0743167	0.0623105	-0.00527502	-0.210808	-0.185173	-0.0629317	0.00554565	0.146756	0.223545	0.0991044	0.0944017	0.14619	-0.0581784	0.0131753	-0.103295	-0.027326	0.0187936	-0.178021	-0.225199	0.0720231	0.140907	-0.0503609	0.210684	-0.0887397	0.121591	-0.0840152	-0.148107	-0.0523557	-0.0715862	0.00272469	-0.0237729	0.106114	0.298542	-0.0424802	0.178789	0.0335642	-0.045152	0.0285521	0.00674452	0.135298	0.0976243	-0.209733	-0.0655427	0.0865185	-0.0301643	0.0580611	0.140033	-0.0506766	-0.0101165
ABITRAM	0.0807799	0.00702869	0.0299094	-0.391745	-0.15288	-0.446637	-0.196589	-0.325123	0.00392307	-0.0856689	-0.306721	-0.188971	0.0717489	0.00651826	-0.0198231	-0.0206202	0.0045208	0.0715846	-0.157031	0.0987774	0.0529302	-0.414747	-0.10893	-0.271598	0.0343899	0.235838	0.278344	0.102758	0.0729022	0.170328	0.246148	-0.357843	0.0616352	-0.0297708	-0.381561	0.111159	0.288156	0.123571	0.744446	-0.283767	-0.240098	-0.0491221	0.145229	-0.135989	0.251277	0.0649739	-0.543519	-0.17742	-0.191689
ABL1	0.359557	-0.0484686	-0.0568598	0.12826	0.144603	0.284328	0.0650274	-0.0930521	-0.226641	-0.29121	0.210793	0.0727544	-0.12414	0.267874	0.574413	-0.120553	0.025606	0.31859	0.579817	0.366629	0.301623	0.529144	0.0731434	-0.123595	-0.0685548	0.283084	0.104231	0.158908	0.179542	0.29555	0.195866	0.123606	0.0142764	0.138577	0.174324	0.147905	-0.0243201	0.226454	0.0628296	0.215963	0.027815	-0.0221893	-0.0426135	0.188845	0.248951	0.333077	-0.136627	0.0547921	0.237991
ABL2	0.0352316	-0.15458	-0.050483	0.0156407	0.107489	0.0447049	-0.0316319	0.0562441	0.0967367	-0.409154	-0.181237	0.19774	-0.0830421	0.0726413	-0.0497286	-0.180413	0.214956	0.261126	0.0161205	-0.241947	0.184133	0.0784359	-0.047844	0.0186614	-0.024219	0.0915844	0.13194	0.184133	0.14672	-0.0165278	0.146918	-0.125708	-0.206289	-0.0862886	-0.0191299	-0.433068	0.0255785	0.154824	-0.552922	0.359434	-0.0766406	0.0226415	0.149383	-0.116172	0.167916	0.0467606	0.0766435	0.169522	0.328189
ABLIM1	-0.0491221	-0.647057	-0.444708	0.121773	0.410982	0.369258	0.394714	0.07715	-0.216385	-0.164286	-0.302153	-0.216758	-0.0643191	0.802956	-0.453027	-0.26733	0.118682	-0.0892142	0.664884	0.432223	0.33909	0.327325	0.0203391	0.154044	-0.126446	-0.545506	0.700801	0.636236	0.733038	0.772576	0.519726	0.108156	0.32582	0.21096	0.255746	-0.101797	0.443881	1.0131	0.3972	0.237991	-0.162305	0.892138	0.560331	0.684266	-0.227504	-0.140718	0.664884	0.924609	0.605752
ABLIM2	-0.0223332	0.152483	-0.00851006	0.104612	0.0396683	0.0153829	0.0445468	0.0518215	-0.0679776	0.0516001	-0.00163065	0.245142	-0.0660619	-0.117015	0.063012	0.0380745	-0.0985833	0.228861	0.0431562	0.01354	0.135145	0.175338	0.234963	-0.071558	-0.00586523	-0.239258	-0.0913795	-0.240289	-0.209094	-0.108705	-0.191801	0.0816679	0.11295	0.110788	0.23557	0.205709	-0.0723064	-0.0173982	0.0268588	0.0338188	0.207904	0.0181594	-0.0766885	-0.0858081	0.215318	0.0683154	0.0744027	-0.0537799	0.0314983
ABLIM3	-0.224901	-0.0685008	1.13251	0.118442	-0.18337	-0.569738	0.259436	-0.0154837	0.137648	0.13772	-0.0917524	0.626113	-0.324162	-0.555162	0.402734	0.726748	-0.2049	-0.0873362	-0.181522	-0.499852	-0.0564835	-0.309351	0.365397	-0.383491	1.12377	-0.253695	-0.208688	-0.296208	-0.705451	-1.03004	-0.0117364	-0.0015116	-0.101797	-0.166918	0.763229	-0.0414763	0.201281	0.0493266	0.469755	0.490994	0.608202	-0.0225244	-1.08869	-0.568845	-0.23264	0.469367	-0.472513	-0.706364	-0.598051
ABO	-0.245995	-0.0654813	-0.0290785	-0.127311	-0.0299715	-0.229121	-0.290612	-0.0847235	-0.0393877	-0.121362	-0.466049	0.0937013	-0.0803907	-0.141302	0.133469	0.222687	-0.287213	-0.0568052	-0.139469	-0.329732	-0.149819	0.291057	0.50628	-0.162269	0.216539	0.204621	-0.0553275	0.0136061	-0.17992	-0.0723064	-0.196642	0.0772035	-0.0670064	-0.13167	0.299096	0.268269	-0.190328	-0.125607	0.158143	0.0839138	0.293829	-0.219327	-0.156217	-0.290228	-0.00186718	-0.469424	-0.10307	0.125802	-0.0909928
ABR	-0.130284	-0.129412	0.121181	-0.311996	0.116658	-0.133807	-0.0515257	-0.277025	-0.134647	-0.481439	-0.105776	0.00275155	0.0551302	-0.00634868	0.036718	-0.060186	-0.0220901	0.116713	-0.15068	0.0348578	-0.18418	-0.116533	0.073966	0.220546	-0.0965081	0.104131	-0.0534409	-0.105171	-0.0425337	-0.0926738	-0.105751	0.0759303	-0.0342822	-0.0751707	-0.0051748	0.305551	-0.13461	0.238607	-0.0656845	-0.0816504	-0.0462337	0.139476	-0.0643191	-0.151913	-0.0868434	0.0942107	-0.157927	8.62e-05	-0.151913
ABRA	0.0403238	0.125727	-0.0403512	0.0788026	-0.196899	-0.0644012	0.162032	0.0956617	-0.058998	-0.00522744	-0.140504	0.0366065	0.0135849	-0.0445382	-0.0666168	0.0313582	-0.0918717	0.1111	0.0197685	-0.000178351	0.00801144	-0.0339166	0.420958	-0.0744249	-0.0587825	-0.157132	-0.0580265	-0.0857239	-0.00950922	0.0964864	-0.0873981	-0.104207	-0.087677	-0.00506267	0.105468	0.218441	0.020816	0.0365017	-0.126605	-0.0330228	0.0199211	-0.108647	-0.00437607	0.0129725	-0.00910421	0.208623	0.0793757	0.254451	-0.0482152
ABRACL	-0.171377	0.333959	-0.355603	-0.0429938	-0.0129488	0.0779329	0.391897	-0.0623121	-0.159297	0.432721	0.12538	-0.45898	0.278415	0.269463	-0.247425	-0.239147	0.277448	-0.312082	0.262263	0.0270384	0.148916	-0.479553	-0.136356	-0.0379938	-0.020514	-0.505132	0.383687	-0.00400975	0.671978	0.258229	0.587908	-0.592169	-0.0321494	0.0916794	-0.192347	-0.541846	0.212674	0.0688584	0.00114589	-0.206289	-0.0212236	0.088289	0.37209	0.285146	0.0264871	-0.332727	-0.0984167	-0.429341	0.06914
ABRAXAS1	-0.0437477	-0.808061	-0.331522	-0.345504	-0.48649	0.0276215	0.156514	-0.0655973	-0.496516	0.254736	-0.0374446	-0.449214	-0.182163	0.430704	-0.109598	-0.313626	-0.0348982	-0.577436	-0.0566712	0.445913	0.410705	-0.296284	-0.799848	0.131531	-0.669254	-0.213778	0.347004	0.304441	0.844246	0.44166	0.368331	-0.686677	-0.171868	-0.178426	-0.629154	-0.454425	0.489839	0.441473	0.350545	-0.428333	-0.533058	-0.011846	0.423018	0.304952	-0.115727	-0.709363	0.608552	0.41136	0.331395
ABRAXAS2	0.203997	-0.0990476	-0.268941	0.0555784	-0.0514937	0.111986	0.156037	-0.122261	-0.234345	0.0233888	-0.047664	-0.163631	0.168648	0.331639	-0.100543	-0.287213	0.204808	-0.323528	0.134529	0.214198	0.301367	-0.202485	-0.152685	0.188845	-0.249116	0.173599	0.265775	0.279021	0.39229	0.374454	0.453066	-0.165874	-0.0855884	0.06096	-0.214334	-0.282011	0.134632	0.251277	0.203666	-0.23747	-0.169325	0.511928	0.225932	0.276301	-0.179124	-0.00158582	0.020602	0.0045208	0.254863
ABT1	-0.145999	-0.185621	-0.037725	-0.254194	-0.29788	-0.134647	-0.0479711	-0.229634	-0.119016	-0.0486516	-0.0643773	-0.176779	-0.0580265	0.0623696	0.111519	-0.0865855	0.0266259	0.12409	-0.123628	0.00758616	0.132156	-0.174163	-0.167532	0.139476	-0.105776	0.0298126	0.0723226	0.294042	0.103169	0.18615	0.0623422	-0.0304213	0.0159934	-0.0996395	-0.244868	-0.138966	0.0777431	-0.0615199	-0.0264245	-0.279242	0.00492605	0.134529	-0.13025	0.127564	0.0559503	-0.104646	-0.0403041	0.22971	0.306252
ABTB1	0.107688	0.249396	0.224908	0.0511843	0.173025	0.245195	0.167983	0.0767896	0.127023	-0.180504	-0.0905462	0.662157	0.324691	-0.170581	0.387948	0.275117	0.0462261	-0.100929	0.0105479	-0.241406	-0.0611789	0.0220203	0.537011	0.386732	0.202999	0.274665	-0.0967237	-0.0368661	-0.180335	-0.0792869	-0.212344	0.48318	0.0257921	-0.133605	0.291964	0.569021	-0.108828	0.0614066	-0.141988	0.0355026	0.140871	-0.02999	0.235378	0.170084	-0.0411111	0.274798	-0.252866	-0.248151	-0.524543
ABTB2	-0.267663	-0.263254	-0.279384	-0.396121	-0.135359	0.175935	-0.336277	0.0527803	-0.0927866	0.0450391	-0.0579959	-0.0951463	-0.406968	-0.398749	0.0156407	0.0925269	-0.141873	-0.0334563	-0.249982	-0.261061	-0.178617	0.0852998	-0.052571	-0.228075	-0.119694	-0.127873	-0.0747144	-0.102326	-0.0261575	-0.205641	-0.120875	0.201838	0.303863	0.198193	0.176693	0.216949	-0.254701	-0.0192556	-0.0748812	0.345576	0.0428428	-0.120313	-0.0821747	-0.16412	0.0825095	0.261379	0.506543	0.113515	0.137003
ACAA1	-0.490354	-0.28616	0.0934068	-0.158896	-0.259217	-0.304407	-0.212344	-0.413489	-0.208104	-0.453211	-0.469184	-0.382959	0.224612	-0.0116678	-0.0563303	-0.160996	0.0176388	-0.563805	-0.328965	-0.636184	-0.735062	-0.391003	-0.101058	0.19552	-0.165246	0.215591	-0.0308147	-0.258782	-0.0102972	-0.409154	0.0660892	-0.267908	-0.389088	-0.425194	-0.385696	-0.129243	-0.335893	0.0952971	-0.0778673	-0.274262	-0.236424	-0.288928	-0.0941436	-0.279521	-0.282157	-0.104298	-0.467364	-0.200825	-0.270843
ACAA2	0.0807463	-0.0806694	-0.030656	-0.0473649	0.0183607	-0.252405	0.03973	-0.247622	-0.25586	-0.0329676	-0.2817	0.118645	-0.0231399	0.120901	-0.0130504	-0.0501087	-0.0869047	-0.187587	-0.185575	-0.132514	0.030106	-0.0944037	-0.130828	-0.169743	0.125836	0.378279	-0.240167	0.163601	0.00175297	0.137392	0.0817536	-0.120516	-0.000464925	0.0227647	-0.181733	-0.188513	0.064314	0.185917	0.0650274	-0.168177	-0.0474385	-0.115014	-0.0843764	0.0193163	-0.0346465	-0.000306676	-0.214388	0.134632	-0.0919843
ACACA	0.224763	0.188547	-0.249116	-0.143899	0.142361	0.0991408	0.0803419	-0.0669567	-0.0124586	-0.00179276	-0.0310075	0.0773259	0.0837878	0.00239915	0.0352572	-0.133666	-0.220543	-0.00262512	0.173458	0.0311758	0.102498	0.507693	-0.0852907	-0.249052	-0.477862	-0.165403	0.106544	-0.0367262	0.0395165	0.105915	0.0515404	0.0271107	-0.319069	0.0666471	-0.0593454	-0.23565	0.0892854	-0.119663	-0.0920376	0.0486046	-0.127663	0.0116237	-0.135604	-0.111236	0.0629869	0.33466	0.243729	-0.195894	0.123319
ACACB	0.246704	-0.0637858	-0.0832083	0.0756257	0.198942	0.0711595	0.1082	0.138619	-0.0115492	-0.0470917	0.248951	0.150238	-0.221957	0.0947038	0.0292411	-0.0176882	-0.0103753	0.00906377	0.130419	0.0254828	-0.0647048	0.344647	0.0256857	0.192802	0.235215	-0.174482	-0.0296364	0.0865499	0.0512622	-0.00736113	-0.0632489	0.417936	0.101831	0.190579	0.260939	0.111037	-0.0749718	-0.201977	0.319058	0.450403	0.0903085	0.20749	0.0325264	0.187611	0.0758117	-0.0397618	-0.16412	0.0275477	-0.221012
ACAD10	-0.0163894	0.0768245	0.103571	-0.0373385	0.111667	0.0917996	-0.16954	0.0654936	0.14124	0.0751845	-0.121294	0.163056	-0.129797	-0.00796119	0.132046	-0.00444289	-0.0456782	0.320105	0.157776	0.0618719	0.360457	0.17428	0.414854	-0.024219	0.309128	-0.173262	0.0577358	-0.177294	-0.272492	-0.157608	-0.0180521	0.00341743	0.241891	0.0212868	0.13987	0.189178	-0.257403	-0.0353553	0.0320612	0.0532974	0.191377	0.0262729	-0.119146	-0.124735	-0.119853	0.0367428	-0.138377	0.00314268	-0.149546
ACAD11	0.303328	-0.098146	-0.205756	-0.152914	0.155774	-0.0319083	-0.123123	0.111004	-0.247672	0.0234608	-0.0884671	-0.0130504	0.288958	0.268382	-0.531806	-0.285943	-0.250275	0.564132	0.211119	-0.341213	0.0749643	-0.404905	-0.125994	0.24385	0.0236216	-0.0158791	0.406988	0.347493	-0.0341995	-0.173262	0.127599	-0.144101	-0.359274	0.302562	-0.0542342	-0.128547	0.187964	0.563809	0.385169	-0.225734	-0.23476	0.188112	0.0260682	-0.050046	-0.095501	-0.10914	-0.0591137	0.0143787	-0.156818
ACAD8	0.673267	0.495823	0.223491	0.0341439	0.241189	0.259684	0.177196	-0.0684483	-0.119437	-0.694881	-0.00015108	-0.308663	0.706539	0.663797	0.0645211	-0.224113	0.219996	0.0149458	0.442033	0.265775	-0.0340473	-0.157132	-0.147441	-0.396795	-0.0471224	0.451241	0.230697	0.533745	0.246405	-0.249641	0.402734	-0.221109	-0.169464	0.229025	-0.047844	-0.0419194	0.398305	0.306252	0.469179	-0.118929	-0.220453	0.288655	0.119852	0.17326	-0.128048	0.12742	-0.348152	-0.273266	-0.107311
ACAD9	0.208678	0.0796906	-0.170491	0.0752186	0.354243	0.172305	0.099796	0.150357	0.20246	0.0562956	0.254046	-0.0360993	0.329221	0.243651	0.0289244	-0.212289	0.246465	0.294785	-0.00145594	0.0171847	-0.236262	-0.139469	-0.0237945	-0.106575	-0.153202	-0.0324276	0.17944	0.10799	0.147299	0.179661	-0.118901	-0.0902013	-0.100423	-0.309138	-0.15288	-0.246771	0.0208719	-0.0493167	-0.198988	0.0423445	-0.0268068	0.171121	-0.0555842	0.136192	0.300845	0.302226	0.0429489	-0.00760918	-0.110924
ACADL	-0.0411645	0.22048	0.0666471	0.117734	0.245406	-0.044986	-0.0209135	0.106242	0.0318023	0.0512349	-0.173933	0.188942	-0.115343	-0.0166517	-0.00498681	-0.0388689	-0.08294	0.0869518	0.0652642	-0.167402	-0.202261	0.253203	-0.0962696	0.0856532	0.0959173	-0.08341	0.0667496	0.00989186	-0.00160833	0.0981992	0.0176945	-0.162269	0.0125948	0.028796	-0.106172	0.0513977	0.00999584	0.018722	-0.163319	-0.130537	-0.0342566	0.0354501	0.0957558	0.326561	-0.0800826	0.089812	0.0451489	-0.0914325	-0.006253
ACADM	0.471971	0.4679	-0.51553	0.0406691	-0.383093	0.109304	0.827196	0.0547663	0.0689193	0.412098	0.714056	-0.170818	0.346368	0.701618	-0.190917	-0.168723	0.425607	0.0160423	0.445913	0.419528	0.334392	-0.229067	-0.371231	-0.523659	-0.354298	0.377185	0.56316	0.0272449	0.849945	0.814558	0.634389	-0.576029	-0.157273	0.478693	-0.0582391	-0.31071	0.544605	0.179883	0.564132	-0.367671	-0.300213	-0.282215	0.51052	0.0970823	-0.27971	-0.497258	-0.432363	-0.525134	0.38637
ACADS	-0.0664293	-0.134029	-0.147232	0.258396	0.0777431	-0.443277	-0.264882	-0.0575522	-0.252219	-0.264682	-0.644927	0.280094	0.23279	-0.26337	0.0431562	0.405987	-0.477167	-0.034058	0.122084	-0.169577	-0.527341	-0.0233541	0.189554	-0.0162353	0.112229	-0.0168175	0.00565218	-0.0974376	-0.0946092	-0.247793	0.0511579	-0.154855	0.0242375	0.199559	0.157935	-0.223213	-0.0138424	0.0427641	-0.298367	0.0598202	0.105766	-0.2817	-0.0644845	-0.290071	-0.114806	-0.331802	-0.358936	0.075147	-0.156261
ACADSB	0.775182	0.206916	0.0775007	-0.0522746	-0.0350553	-0.0494779	0.38409	0.159297	-0.141656	0.478693	0.181667	-0.179581	-0.0295831	0.524359	0.0239456	-0.146374	0.340609	-0.0831814	0.208004	0.37209	-0.0411111	0.11412	-0.161177	0.0754779	0.0279903	0.524359	0.440988	0.534276	0.593847	0.671405	0.413982	-0.0462337	0.276837	0.298862	0.205858	-0.208964	0.513124	0.409167	0.670788	-0.387235	-0.235588	0.0040702	0.464601	-0.276563	-0.290317	-0.0783268	-0.131812	0.099519	0.127166
ACADVL	-0.014217	0.175015	-0.330784	-0.11294	0.218799	0.207065	0.327416	-0.186236	0.119852	0.0174258	-0.129894	-0.0873362	0.352578	0.21074	0.40629	-0.153954	-0.0994554	0.198611	0.367	0.0536218	0.0168622	0.0423445	-0.201624	0.150023	-0.145115	0.30698	-0.0190574	-0.0307427	0.147533	0.231104	0.312224	-0.0395903	-0.0807915	0.168564	-0.256088	-0.237128	-0.0753328	0.24526	0.19505	0.0585811	0.011057	0.504137	-0.285595	0.180906	-0.108481	0.678103	-0.292518	-0.355468	-0.230714
ACAN	-0.108961	0.0561336	-0.0169145	0.0565836	0.325374	0.047861	0.18149	0.089812	0.219414	0.0971531	-0.0262838	0.077774	-0.102057	-0.309288	0.0462682	0.17436	-0.0303802	0.221912	-0.0690461	0.000211397	0.0343357	0.14935	0.201484	0.0623696	0.145642	-0.222223	-0.194983	-0.387969	-0.261428	-0.0660923	-0.221528	0.209083	0.119653	-0.0827498	0.409672	0.193968	-0.038018	-0.0665356	0.0383428	0.298076	0.340609	-0.0225474	0.0801401	-0.0344526	0.254185	0.0775322	0.0586245	-0.0535461	-0.021073
ACAP1	-0.162848	-0.254194	-0.128722	-0.0602183	-0.0173703	-0.209684	0.0716521	-0.165564	-0.331904	-0.210332	-0.382748	-0.176195	-0.027987	0.0360895	-0.243872	-0.0917242	-0.11402	-0.112107	-0.0495493	-0.370989	-0.118841	-0.239258	-0.148179	0.300066	0.154337	0.0122323	0.0147412	0.0212868	0.15585	0.112509	0.0754494	-0.122287	-0.20013	-0.395977	-0.0891258	-0.272048	-0.199779	0.28176	-0.222847	0.018607	-0.0653076	-0.154284	0.107104	-0.462836	-0.159157	-0.108218	-0.496036	-0.0180258	-0.279313
ACAP2	-0.0571998	0.450921	0.31859	0.623696	0.157895	0.169477	0.246096	0.0139916	0.0771743	-0.188513	-0.00345637	-0.231788	0.140197	0.0653237	0.131609	-0.162482	0.403473	-0.160503	0.00960421	0.0630795	-0.0286908	0.0678359	-0.490963	0.48318	-0.236981	0.158175	-0.15265	-0.0586171	-0.0144006	0.0341439	0.0114275	0.0182847	-0.545506	-0.00917883	-0.539436	-0.131088	-0.209414	0.118873	-0.588671	-0.113761	-0.168805	0.113917	0.290986	0.0965941	-0.092729	-0.0519204	-0.0591867	-0.405656	-0.301192
ACAP3	0.104397	-0.180735	-0.246658	-0.126092	0.152322	-0.0643191	0.122636	-0.181096	0.102657	-0.165957	-0.161446	0.380897	0.0685001	-0.00392954	-0.0225723	-0.051179	-0.0256611	0.056794	0.307836	0.240517	-0.175245	-0.0528718	0.236482	0.15049	-0.104963	-0.0665095	0.0165316	-0.306141	0.11051	-0.0304005	0.0641358	-0.0153822	-0.194658	0.0203155	0.455108	0.00497102	-0.13677	-0.320383	-0.450272	0.0419711	-0.113953	0.0289464	-0.376643	-0.0556596	-0.249052	-0.133268	-0.156675	-0.393175	-0.339391
ACAT1	-0.0911866	-0.0535215	-0.223891	-0.245409	-0.217211	-0.24039	-0.10596	-0.224999	-0.00549903	0.0648332	-0.182612	-0.144617	0.156308	0.176208	-0.213864	-0.117949	0.0368805	0.130189	-0.236262	0.0256315	-0.219935	-0.257556	-0.259324	-0.254324	0.0341989	-0.116048	0.197003	0.0286863	0.253562	0.0791	0.218332	-0.408266	-0.0386231	-0.215947	-0.215252	0.0435594	0.31781	0.26624	0.117601	-0.181891	0.0590641	-0.0156062	0.178524	-0.365699	-0.144244	-0.398153	-0.121961	0.0399447	0.0886467
ACAT2	0.11954	-0.152576	-0.261809	-0.391635	-0.375778	0.0543794	0.138652	0.227514	-0.0255097	-0.0452043	0.0472153	-0.285402	-0.0172752	0.108907	-0.254454	-0.145074	-0.11272	0.0128638	0.500989	-0.123701	0.17013	-0.17086	-0.128405	-0.407958	-0.238824	0.0197154	0.401477	0.123721	0.406809	0.146672	0.259622	-0.1101	-0.00203547	0.084735	0.0592759	-0.0857493	0.270836	0.309539	-0.0898795	-0.283636	-0.0351734	0.11584	0.437426	0.164362	-0.667164	-0.211626	-0.0632999	-0.158098	0.228248
ACBD3	0.281613	0.0788345	0.118299	0.548119	-0.33482	0.363589	0.275759	-0.327487	0.140455	-0.00558178	0.437798	-0.245173	0.19194	0.0660564	0.272564	-0.236981	0.462796	-0.548082	0.0944657	0.565123	0.580192	0.252212	-0.0547209	0.468336	0.298542	0.417936	0.367353	0.218739	0.362619	0.240995	0.340284	-0.460832	0.208471	0.223095	-0.292589	-0.11976	0.321745	0.255703	0.403473	-0.377764	-0.199312	0.340075	-0.126421	1.00526	-0.0413439	-0.530556	-0.0155518	0.0550451	0.368331
ACBD4	0.0889438	-0.435591	0.0280191	-0.194863	-0.0224011	-0.0513652	-0.29412	0.029833	-0.0567083	0.168564	-0.0772967	0.234517	-0.573759	-0.0910523	0.0409045	0.129306	-0.32278	0.0940209	0.223829	-0.0447812	-0.0253312	0.0439721	0.0959973	-0.140133	0.409672	0.0256315	-0.0783268	-0.217595	-0.173262	-0.31721	-0.0763688	0.432364	0.178561	0.442224	0.635374	-0.00299137	-0.380754	-0.000605871	-0.102764	0.340815	0.167207	0.0984602	-0.156919	-0.0271221	0.395492	-0.0209888	0.053935	-0.0593203	-0.38862
ACBD5	0.19911	0.218063	-0.215389	0.1031	-0.316223	0.00796449	-0.0629067	-0.384867	-0.0681971	-0.178227	0.199668	-0.392458	0.388092	0.253086	-0.0176882	-0.176687	0.345963	-0.155834	0.117415	0.200772	0.0396095	-0.0731748	-0.190033	0.0448292	-0.758246	0.559997	0.203155	-0.0328812	0.169964	0.296728	0.255812	-0.104174	-0.23774	0.102163	-0.151659	-0.345987	0.138142	-0.0677226	0.199957	-0.346807	-0.357192	0.399893	0.217939	0.0201342	0.116858	-0.0893003	-0.0997264	-0.110755	0.254796
ACBD6	-0.0744508	-0.48074	-0.213484	-0.0445382	-0.206069	-0.316772	0.112197	-0.265009	-0.314807	-0.300141	-0.213098	-0.566636	-0.16481	0.144603	-0.326481	-0.599289	0.106898	-0.303053	0.00646879	0.20902	0.0337591	-0.110812	-0.168359	0.00065492	-0.173898	0.0992026	0.467487	0.180012	0.365861	0.0773866	0.325162	-0.377376	0.0166285	-0.181522	0.061043	-0.449396	0.272768	0.0528756	-0.198107	-0.370136	-0.2387	0.337885	0.0342778	-0.147025	-0.669254	-0.335409	-0.138039	-0.25944	0.247389
ACCS	-0.150567	-0.748043	-0.463362	1.03794	-0.264807	-0.115113	-0.162138	-0.298367	-0.480525	-0.181096	-0.101494	-0.0579469	1.13704	1.07636	0.912002	-0.534826	-0.178466	-0.354855	0.191108	-0.209777	-0.305827	-0.561147	-0.474247	0.133816	0.558919	1.10005	-0.149218	0.826022	0.0146028	0.019396	-0.165915	-0.445409	-0.652432	-0.524821	0.331284	-0.941876	-0.286501	-3.16e-05	0.416281	1.22413	-0.175016	1.06032	-0.253954	-0.499852	-0.3372	-0.430004	0.442224	0.522338	-0.593515
ACD	0.0388601	-0.424252	-0.771029	0.0517435	0.00137816	0.00717882	0.213133	-0.242992	0.16747	-0.0738404	-0.141008	-0.0278898	0.089678	0.306545	-0.218794	-0.619284	-0.0484993	-0.118709	0.388259	0.375816	0.0856866	0.269609	-0.0206202	0.232678	-0.270985	0.266183	0.244094	-0.094997	0.484941	-0.00796119	0.113818	0.0962058	-0.345685	-0.317788	-0.0844338	-0.146139	0.0796256	-0.0166042	0.0245258	-0.275941	-0.319911	0.540383	0.149183	-0.0994798	-0.0604959	0.160545	-0.267663	-0.220796	0.0177627
ACE	-0.411564	-0.286287	0.310807	0.0210763	0.0745687	-0.273266	0.146107	0.19824	0.229101	-0.0320727	-0.0753078	0.477361	-0.17975	-0.0759299	0.440613	0.228132	0.183245	-0.103806	-0.0339417	-0.0772338	-0.0454837	-0.331904	0.342669	0.244966	0.112509	0.228415	-0.0660619	-0.0399726	-0.266975	-0.320295	-0.129412	0.277448	0.141782	0.420174	0.11801	0.368103	0.0183607	-0.0596901	-0.174443	0.0304217	0.318061	0.0427641	-0.420735	0.213806	-0.105226	0.0210243	0.069261	0.088777	-0.0341401
ACE2	0.156134	0.130003	0.0487192	-0.261117	0.130388	-0.0949237	0.148154	-0.0705436	-0.052117	0.233032	0.113419	0.0139367	0.0350303	-0.151074	-0.189916	0.0464058	-0.0796634	0.0572878	-0.0616012	-0.00415518	-0.0217814	-0.221372	0.3439	0.264098	-0.0866923	0.00874259	0.021478	-0.158676	-0.131256	-0.129313	-0.190073	0.0473863	0.202218	0.0834721	0.338095	0.20447	-0.0796881	-0.116949	-0.0109813	0.0891011	0.078917	-0.0930185	-0.0598259	0.0187936	0.309282	0.304524	-0.174163	0.0470701	0.0101888
ACER1	0.0361692	0.0179781	-0.10304	-0.0547426	0.110312	0.129967	-0.245002	0.0403816	-0.131885	-0.155907	0.572507	0.229768	-0.0622423	-0.242512	0.453844	-0.142131	-0.417362	0.2979	0.419154	-0.175952	0.179923	-0.18012	-0.110924	0.0132304	0.44336	-0.192025	-0.0639858	-0.0596029	0.114708	0.116658	-0.0543335	0.375912	0.185028	0.368331	-0.127873	0.0880637	-0.0978328	-0.0594218	0.600789	0.0625253	-0.0217609	0.404867	0.559265	0.176429	1.18729	0.173025	0.0156709	-0.00957348	0.1082
ACER3	-0.067922	0.00394737	-0.0413439	-0.425069	-0.0487994	-0.250038	-0.229787	-0.178021	-0.135954	-0.158968	-0.0977532	-0.256088	0.425607	-0.0144006	0.0238599	-0.223323	0.419729	-0.128722	-0.0173485	-0.228726	-0.144287	-0.366639	-0.370471	0.144085	-0.402245	0.265218	-0.0703053	-0.116108	0.0333384	-0.306291	0.274979	-0.295579	-0.360645	0.522695	-0.407644	-0.463039	0.105938	0.306545	0.251102	-0.137901	-0.184773	0.246405	-0.270666	-0.197688	-0.26225	0.472199	-0.351158	-0.420294	-0.27193
ACHE	-0.227092	-0.183967	-0.0247041	-0.205888	0.0494631	-0.10185	-0.281265	-0.124065	0.109129	-0.0027376	-0.201567	0.0604207	-0.130183	-0.147762	0.269393	0.218441	-0.262011	0.101705	-0.217492	-0.320295	-0.128344	-0.076131	0.507693	0.0547663	0.120681	0.0475089	-0.168685	-0.0480021	-0.174782	-0.0425068	-0.0861729	0.0816436	0.0764436	-0.0674469	0.0879593	0.323687	-0.100364	0.0824447	0.156912	0.251757	0.0985833	-0.328877	-0.377506	0.0887088	0.178746	-0.139929	-0.195029	0.140415	-0.0464338
ACIN1	0.505835	0.10509	0.14904	0.706539	0.487245	0.306173	0.349158	-0.0818326	0.308949	-0.0286158	-0.0518936	-0.0480886	0.397841	0.416747	0.208944	-0.296376	0.0904277	-0.159297	0.422853	-0.0266402	0.120681	0.475673	0.16848	0.551255	-0.00365671	0.442395	0.187108	0.403776	0.251323	0.490076	0.301299	0.290926	-0.304991	0.0617016	0.157378	0.0401326	0.361279	0.296342	0.0902164	-0.0168681	-0.181608	0.625211	0.232842	0.433894	0.349721	0.410294	-0.477361	-0.150135	-0.269013
ACKR1	-0.318206	0.154244	0.270836	-0.514742	-0.180413	-0.363185	-0.23498	0.101255	-0.112972	0.271148	-0.31022	0.231783	-0.621632	-0.435412	-0.020141	0.877138	-0.519442	0.837557	-0.508844	-0.759581	-0.444128	0.22971	0.0774723	0.0753384	0.122778	-0.363657	-0.688538	-0.350727	-0.768686	-0.0260555	-0.435273	-0.00723256	0.573712	0.209828	-0.374738	-0.258593	0.0793757	0.521507	-0.00840273	0.360047	0.693074	-0.426852	-0.114086	-0.555162	-0.0336298	0.0415209	-0.0627295	0.123001	0.0275085
ACKR2	0.213976	-0.0102467	0.0062007	0.0612061	0.184883	0.169211	0.0830392	0.171327	0.402167	0.302226	0.43017	0.278344	-0.0316537	-0.391635	-0.14054	0.113104	-0.000100289	-0.098237	0.0347838	0.0745687	0.223146	0.0491334	0.075535	-0.00818779	-0.111967	-0.149013	-0.294569	-0.216516	-0.363993	0.00523618	-0.409999	0.122636	0.226615	0.460994	0.264437	0.439195	-0.143461	-0.123727	-0.0869047	0.123275	0.29227	-0.0330228	0.0440756	0.0461457	0.160272	0.0472153	0.272279	0.0158639	-0.0133629
ACKR3	0.344223	-0.260439	-0.441778	-0.236095	-0.239484	-0.265287	0.195955	-0.109537	-0.0881389	0.0138655	0.221032	-0.223953	0.316768	0.404572	-0.335327	-0.212239	0.209465	-0.200825	0.492746	-0.0499987	0.239628	0.0806096	-0.0415859	-0.297138	-0.377506	0.246525	0.146259	0.270899	0.354759	0.092188	0.326561	-0.101681	-0.00163065	0.0585529	0.0499008	-0.369739	0.253086	0.251757	0.21463	-0.161962	0.0369369	0.31634	0.117977	-0.151872	-0.377645	-0.219935	0.0547081	0.289632	0.279142
ACKR4	-0.170169	-0.100017	-0.194706	0.271348	-0.144888	0.154705	-0.218844	-0.0803907	0.0753384	-0.00614378	0.0265979	-0.177833	-0.050201	-0.124065	0.000705828	-0.184657	-0.0353064	-0.149925	-0.166742	-0.0413439	-0.0568303	-0.0899045	0.344804	-0.162769	-0.202376	0.205112	-0.0913524	0.255257	0.157124	-0.408701	0.0125643	-0.0393096	-0.161993	-0.0150434	0.438655	-0.124198	0.0545167	0.0388149	0.125279	-0.0382675	0.00262238	-0.163087	0.433894	-0.333423	-0.0190853	-0.0713879	-0.0323717	0.0324791	0.0192846
ACLY	0.130734	-0.0772691	0.16498	0.131531	-0.111967	0.128995	0.0290806	-0.161339	-0.197288	-0.532372	-0.0483499	-0.0480643	0.271148	0.306028	0.251577	-0.0777892	0.13219	0.104509	0.190956	0.167983	-0.104555	0.0256315	-0.0856988	0.200179	0.0655233	0.345669	0.0695016	0.284486	0.181026	0.141697	0.240941	0.225379	-0.0402287	0.0359478	-0.0704905	-0.00131429	0.362813	0.127093	0.180145	0.0978561	0.00314268	0.464214	0.197255	0.271555	0.214514	0.274979	-0.0912334	-0.0975803	0.107323
ACMSD	-0.136661	0.22706	-0.00826967	-0.254256	-0.0543067	-0.1337	-0.0544179	0.0592501	0.230751	0.366276	-0.0422691	-0.0726452	-0.0249607	-0.0787365	0.0680991	0.0668959	-0.0797421	0.115977	-0.175458	0.0519996	0.0893161	-0.0274964	-0.110231	0.128087	0.168435	0.199403	-0.0596316	-0.0327045	-0.162628	0.033018	-0.669254	0.0412536	0.774234	-0.198232	0.113844	0.177294	-0.185904	-0.203369	-0.357749	-0.0367849	0.29446	-0.296136	-0.10075	0.00630886	-0.070459	0.354649	0.270261	0.0827282	0.0839461
ACO1	-0.0683094	0.389931	-0.0314883	-0.115314	0.0993292	0.139798	0.0906953	0.0891363	0.128459	0.0774463	0.166479	-0.0526587	-0.239429	-0.00363218	0.0377544	-0.220741	0.373521	0.121978	0.292529	0.265037	-0.142555	0.0948294	-0.157501	-0.116469	-0.127336	-0.167895	0.0422383	0.163632	0.066681	0.235113	0.260471	-0.106575	-0.222976	0.29029	0.226955	-0.139632	0.163491	0.0456164	0.0564979	0.0371373	0.0272682	0.385169	0.260534	0.199668	0.473344	0.170629	0.380005	-0.22338	0.243596
ACO2	0.308183	-0.0917242	0.000137648	0.202946	0.589191	-0.0446277	0.364308	0.245578	0.180098	-0.0446509	0.316509	0.188703	0.230697	0.141419	-0.0696128	0.0304474	0.0658098	0.082284	0.456867	0.0662088	0.0839138	-0.0129488	0.158825	-0.0284245	-0.11364	0.0440756	-0.15276	0.0160884	0.13833	0.255922	0.126211	0.306441	-0.0356558	0.360251	0.106762	-0.0278187	0.230869	0.171172	-0.288994	0.324966	-0.0434054	0.326973	0.201281	0.45914	0.234517	0.123179	-0.261928	-0.0878955	-0.113039
ACOD1	-0.192025	0.191969	0.0712937	-0.234135	0.341508	-0.21147	-0.22553	0.0572583	0.0536511	-0.0163665	-0.036368	0.41877	-0.0999328	-0.366977	-0.0807603	0.567626	-0.107727	0.464799	-0.172338	-0.0277966	0.346601	-0.11038	0.102098	0.0434562	-0.0074151	-0.139406	-0.120084	0.271148	-0.0488583	-0.196678	-0.438007	-0.190849	0.267677	0.237164	-0.00203547	0.022066	-0.207563	-0.245893	0.243596	0.490345	0.150849	0.189685	-0.193705	-0.289559	0.692244	-0.0862597	0.417936	-0.00980057	0.709018
ACOT11	0.059004	-0.191411	-0.152494	-0.0346917	0.0421071	-0.0196015	-0.0884109	-0.0588683	0.199505	-0.115793	0.164616	0.111351	-0.114113	-0.100845	0.115101	0.0923602	0.0599733	0.0442079	-0.0622147	-0.239309	-0.226942	-0.0495493	0.20256	0.0199972	0.129205	0.111927	-0.150352	-0.259823	-0.022693	-0.0863512	-0.263254	-0.00763577	0.0224663	0.0938392	-0.0980246	0.213976	-0.0672573	-0.0153338	-0.104616	0.232678	0.135019	0.0799995	-0.246834	-0.0183289	0.168701	-0.215801	-0.035686	0.0285255	-0.0703658
ACOT12	0.0151244	0.0248861	0.377592	-0.035148	-0.168723	-0.0106133	-0.0842319	0.0870643	0.0981695	0.269673	0.0596688	0.240334	0.124911	-0.170244	0.0819809	0.376035	-0.172588	0.0207099	0.0904608	-0.264166	0.123755	-0.100423	0.745371	-0.145152	0.289563	-0.301192	-0.0897967	0.0651728	0.0469085	-0.262194	-0.0392857	0.010846	0.0643791	0.0674501	0.0348328	0.0144245	0.0883475	0.567626	0.145518	-0.00456837	0.212572	-0.222802	-0.223795	-0.334649	-0.279442	0.336241	-0.0329933	0.340721	-0.109478
ACOT13	-0.496742	0.111451	0.245973	-0.498305	-0.19672	-0.229009	-0.225059	-0.677001	-0.378045	-0.407316	-0.380222	-0.680617	-0.0310677	0.0318573	-0.585544	-0.444128	-0.0221128	-0.306374	-0.245225	-0.363993	-0.278006	-0.359924	-0.410152	-0.549247	-0.577954	0.118997	0.0704517	-0.198321	0.0286369	-0.268612	0.107249	-0.401925	-0.231244	-0.561147	-0.681603	-0.479553	0.135664	-0.417926	-0.281115	-0.269143	-0.305093	-0.497258	0.116786	-0.186612	-0.433942	-0.194658	-0.016412	-0.10564	0.0982895
ACOT2	-0.0673378	-0.120905	-0.550922	0.057815	-0.388404	-0.0505913	0.088377	-0.544819	-0.319147	-0.328715	0.347302	-0.14751	-0.00627743	0.0641619	-0.0509717	-0.0294118	-0.0426647	-0.208648	-0.0763896	0.187824	0.186815	-0.583834	-0.118645	0.0762671	-0.2479	-0.328788	0.0956889	0.155036	0.274165	0.367981	0.0181594	-0.259148	0.216204	-0.348505	0.202946	-0.200825	0.131123	0.0979265	0.247786	-0.0240991	-0.0486279	0.453066	-0.150423	-0.181952	0.0950762	-0.137179	0.083533	0.257195	0.47512
ACOT4	0.381028	-0.0209888	0.0733537	0.606244	-0.0695635	-0.0950609	-0.164245	-0.111911	0.506043	-0.389361	0.206163	0.0174755	0.0062007	-0.477862	0.489839	-0.0813683	0.0988998	-0.0182762	0.631055	0.393015	0.880664	-0.0173485	0.0583234	0.129033	-0.192927	-0.0127771	0.808027	-0.0827498	0.321977	0.0296086	-0.171418	-0.189873	-0.112601	-0.320073	-0.119077	-0.290684	-0.328456	-0.0307427	0.64892	0.0935088	0.075535	-0.0015116	-0.290141	-0.284875	-0.394685	0.0112523	-0.173577	-0.0257782	0.338602
ACOT6	-0.316772	-0.0488583	-0.0704305	0.0298634	-0.105226	-0.0880826	0.187487	-0.0190321	-0.18486	-0.29076	-0.165915	0.142783	-0.0457058	0.0980461	-0.0606343	-0.0963304	0.0253117	-0.0193307	-0.0210143	-0.290071	-0.316223	-0.115727	0.0493557	-0.254194	0.0476802	-0.291142	0.0108681	0.142918	0.12753	-0.018474	-0.227144	-0.0130763	-0.054036	-0.050046	0.275595	0.132225	0.106342	-0.00811054	-0.0319357	-0.219883	0.123032	0.427544	-0.106705	0.331639	0.0555784	0.0394918	0.320943	-0.170892	0.10011
ACOT7	-0.316304	-0.186839	-0.254454	-0.254867	-0.394151	-0.537661	0.0460108	-0.516529	-0.47294	-0.380606	-0.340095	-0.0722506	-0.15288	0.202086	-0.29902	0.139027	-0.470146	0.0792554	-0.4445	-0.158371	-0.12015	-0.224952	0.0417495	-0.474887	0.452147	0.282666	-0.122698	-0.0917836	-0.201053	-0.0709993	0.0566418	0.0130429	-0.117744	-0.337507	-0.0237945	-0.0267834	0.00416667	-0.0368661	-0.0960599	0.116298	-0.0266161	-0.204824	-0.592613	-0.421226	-0.212706	-0.0702286	-0.00082807	0.366629	0.312636
ACOT8	-0.463039	-0.116499	0.151932	-0.0119931	-0.361392	-0.163087	-0.145514	-0.404436	-0.139632	-0.25465	-0.0806381	-0.270779	-0.203501	-0.0246089	0.177858	-0.0711129	0.10486	-0.15461	-0.236748	-0.283698	0.0251879	-0.207299	-0.142952	-0.0961834	-0.0582668	0.306345	0.0519996	0.0285521	0.0112523	0.0977911	0.0707653	-0.193239	-0.0502865	-0.328206	-0.0181758	-0.496742	-0.112326	-0.0712536	0.121773	0.0638376	-0.131383	0.0295148	-0.136661	0.140945	0.202664	-0.0237729	-0.293297	-0.270913	-0.171083
ACOT9	-0.26647	0.101864	-0.144474	-0.505333	-0.243359	-0.354623	-0.268066	-0.565462	-0.410278	-0.604795	-0.216426	-0.723691	-0.0256382	-0.163468	0.00230908	-0.681603	-0.370353	-0.532114	-0.746815	-0.34132	-0.464678	-0.622227	-0.304324	-0.0300144	-0.733903	-0.157169	-0.262083	-0.137613	-0.149119	-0.253817	0.0125177	-0.313446	-0.776873	-0.269013	-0.587033	-0.425354	-0.230771	-0.351158	-0.439832	0.16255	-0.843156	-0.11038	-0.454259	-0.330686	-0.22771	-0.261117	0.583214	0.413694	0.673267
ACOX1	-0.0933993	0.473344	0.628828	0.248004	0.0404431	0.167778	0.0857139	-0.0418949	0.232678	-0.208475	0.0539461	-0.00365671	0.0821462	0.0466803	0.443881	0.0173225	0.237395	-0.169167	0.243973	-0.0317537	0.266446	0.534276	-0.0225723	0.490076	0.103008	0.0382611	-0.315004	0.082571	-0.148413	-0.0681726	-0.0115492	0.411117	-0.153276	-0.266619	-0.261809	0.0502824	0.00633133	0.448392	-0.579162	-0.260323	-0.0182309	0.0439721	-0.0697022	0.362058	0.133314	0.496838	-0.529949	-0.396268	-0.654542
ACOX2	0.161114	-0.0177393	0.277385	-0.21726	-0.232158	-0.0295342	-0.038345	-0.0519657	-0.0775739	0.175686	0.117564	-0.0868748	-0.224901	-0.18696	-0.403571	0.0672775	-0.118035	-0.10778	-0.137433	-0.221957	-0.578327	-0.256958	-0.0740736	0.268636	0.041921	-0.295368	-0.131383	-0.609876	-0.186755	-0.194863	-0.0974977	0.0120977	0.0970296	-0.173617	0.228747	-0.246707	-0.655629	-0.155107	0.221504	-0.0027376	-0.108048	-0.0264245	-0.0731201	0.145401	-0.18486	-0.00350687	0.279021	-0.109197	-0.321703
ACOX3	0.478495	0.120204	0.0815807	0.0297526	0.203564	-0.0177123	0.0127468	-0.0556327	-0.0423726	-0.229832	0.30698	-0.0778383	-0.0901434	0.0275764	0.1443	-0.38862	0.278415	0.0257921	0.0606021	-0.111744	0.199761	1.03509	0.0140433	-0.0652828	-0.352197	-0.132688	-0.069944	-0.0936763	-0.0371867	0.241663	0.0967006	-0.205888	-0.0894546	-0.0971643	-0.0992035	0.0507408	-0.0325015	-0.178426	-0.1101	0.0722596	-0.137652	0.195648	-0.233818	0.513928	0.180906	0.197337	-0.0280721	-0.253695	-0.20013
ACOXL	-0.243678	-0.0639296	0.110581	-0.00511119	-0.0490199	-0.0681726	-0.127142	0.0117514	-0.186887	0.0971846	-0.00179276	0.0173982	-0.157763	-0.0749148	0.161911	0.00916279	-0.212665	-0.11284	-0.187819	0.0142353	-0.115252	0.0203671	0.304952	-0.197033	0.150357	-0.128439	-0.125139	-0.0653985	0.015204	0.0215967	-0.0743721	-0.0347627	-0.0610192	0.100639	0.0753665	0.0899065	0.0352824	0.209232	-0.334925	0.0937326	0.0163777	-0.125364	-0.170695	-0.121088	0.237055	-0.180735	-0.0372132	-0.0350988	-0.155907
ACP1	-0.344986	-0.405656	-0.535521	-0.23004	-0.328965	-0.459826	-0.255402	-0.201402	-0.515277	0.889297	-0.352533	-0.160397	-0.238824	0.0828806	-0.587421	0.123606	-0.122129	0.216366	-0.56462	-0.354855	-0.48119	-0.0871814	-0.0875803	-0.57567	0.11048	-0.115504	0.111986	-0.10405	0.0529862	0.198806	0.228475	-0.224399	0.402641	-0.0125624	-0.0604959	-0.253631	0.152236	0.194615	0.283084	-0.0197762	0.112094	-0.170581	-0.278348	-0.264558	-0.228953	-0.451177	-0.200302	-0.0253775	0.168025
ACP2	0.270626	-0.337697	0.436559	-0.205309	0.279021	-0.341526	0.368197	-0.117771	-0.57702	-0.572955	0.123571	-0.0649467	-0.0433804	-0.0466274	0.381309	-0.173224	0.288288	0.0372893	0.0784359	0.0460108	-0.461411	-0.347858	-0.0827192	-0.286766	-0.212239	-0.0344265	0.060241	-0.0542891	-0.0729058	-0.00471867	0.0721075	0.582369	-0.0946092	-0.102268	0.0657552	-0.00887455	-0.0954121	-0.0239613	-0.376505	0.102595	-0.0647304	0.0493557	-0.206795	-0.0729888	-0.00941643	0.125095	-0.272048	-0.169391	0.0275477
ACP4	-0.10654	0.051484	0.354011	-0.169325	-0.291266	0.230387	0.031943	0.378629	6.45e-05	0.24378	-0.0274503	0.266704	-0.0104262	-0.148704	0.284799	0.424677	-0.612102	0.246043	-0.143789	0.000332443	0.336045	0.1617	0.0411465	0.0148654	-0.0842319	0.0786185	-0.237032	-0.0827991	-0.353315	-0.239652	-0.703558	0.503676	0.242727	-0.0604004	-0.0222614	0.200067	-0.906994	0.202852	-0.0664585	0.304083	0.599581	-0.467545	-0.0250058	-0.0539861	-0.00123913	0.00786483	0.339195	0.266911	0.0725741
ACP5	-0.309207	0.138211	0.693595	-0.138273	-0.304147	-0.148139	-0.0148943	-0.250331	-0.0262556	0.500989	-0.29076	-0.281326	-0.0723661	0.0901495	-0.220796	0.334997	-0.40241	0.699492	-0.25586	0.303631	0.0809729	0.235512	0.229537	0.128475	0.465635	-1.01958	0.2169	-0.118069	0.168849	-0.166301	-0.137865	-0.139538	-0.371351	-0.341929	-0.243413	-0.276159	0.153188	-0.337115	0.329221	0.265834	0.335657	-0.256958	0.464799	-0.0772691	1.10687	-0.532372	0.0355026	0.142057	0.356897
ACP6	-0.0765226	-0.201363	-0.0422411	-0.00271178	-0.205046	-0.0872423	0.458219	-0.0678628	-0.178575	-0.420294	-0.239147	0.160396	0.103077	0.257571	-0.322687	-0.079004	0.0392954	0.13921	0.21096	0.104671	-0.00606782	-0.090604	0.195	0.121318	-0.148413	-0.0422411	0.0162549	0.252089	0.208365	0.447096	-0.112566	-0.219733	-0.0562505	0.0667152	-0.125505	-0.3372	0.0670799	0.0974626	-0.27637	0.0500944	-0.0406847	0.308361	0.0167844	-0.49547	0.00784293	-0.395531	-0.334154	-0.0394459	-0.318796
ACPP	0.158567	0.201085	-0.0845262	-0.275318	-0.054809	0.284722	-0.175737	-0.0603334	-0.132721	-0.0409218	-0.011573	-0.0542342	0.482759	0.0843483	1.17221	-0.0659534	0.0522632	-0.241288	-0.174056	-0.129152	-0.263019	-0.150176	-0.405313	0.14124	-0.0385648	-0.09818	0.0918371	-0.0378786	-0.126534	-0.424555	0.0568171	0.0657795	-0.427874	0.0589707	-0.21444	0.103988	-0.134168	-0.12593	0.212721	-0.0702552	-0.0890331	0.36237	-0.237128	0.259993	-0.134131	0.489359	-0.151146	-0.164286	0.140907
ACR	0.0286369	0.194501	0.429687	-0.09902	0.372354	0.150564	-0.0685548	0.512232	0.0871278	-0.0441381	-0.162969	0.759834	-0.0363158	-0.075254	0.317051	0.6233	-0.0476332	0.214412	-0.252287	0.0527803	0.07715	-0.039069	0.108064	-0.210949	0.828396	0.0815439	-0.290317	-0.275667	-0.0674992	-0.445548	-0.205221	0.739625	0.468975	0.0490233	0.368437	0.0689743	0.0213159	-0.162737	-0.00775359	0.69497	0.0706813	-0.020141	0.164783	0.153875	0.404572	-0.187853	-0.130986	0.0334467	-0.152685
ACRBP	-0.87304	-0.0125909	0.537329	-0.488359	-0.273468	-1.15053	-0.231968	-0.499579	-0.10914	0.0150464	-0.0459301	-0.0282675	-0.476514	-0.583834	-0.329348	0.362943	-0.0241695	-0.172625	0.217546	-0.268744	-0.219784	-0.279582	-0.0564835	0.185818	0.727347	-0.0276643	-0.190033	0.0962058	-0.660268	-0.677001	0.0875003	-0.40781	-0.510997	-0.506968	0.0573166	0.12577	-0.09902	-0.186034	0.653825	0.417655	-0.226585	0.13642	-0.475594	-0.040474	-0.0444217	0.497059	-0.214601	-0.00657091	-0.311553
ACRV1	0.445024	0.151172	0.0616706	0.0269882	0.513928	0.531058	0.473999	0.691678	0.638499	0.310089	0.340898	0.143936	0.260682	-0.0369727	0.0856209	0.0435943	0.0723226	0.172442	0.253562	0.208791	0.0397493	0.440613	0.230387	-0.0200411	-0.0406847	0.0404958	-0.148258	-0.119853	-0.15265	-0.221477	-0.299693	0.201931	-0.00884763	0.125923	0.191888	0.106925	-0.228472	-0.163425	-0.292361	0.410853	0.0788026	0.0657275	-0.0588963	0.156912	0.25925	0.162512	0.135145	-0.29684	-0.191321
ACSBG1	-0.198422	-0.289296	0.0487463	-0.0827991	-0.0135663	-0.410948	-0.0838589	0.1283	-0.221528	0.0200269	-0.014272	0.127451	-0.266086	-0.484012	0.32425	0.400172	-0.215114	-0.094997	-0.408993	-0.00898254	-0.540033	-0.036265	0.189592	-0.482573	0.277096	0.114977	-0.131631	0.0599733	-0.61655	-0.106017	0.107726	-0.252512	0.46623	0.0358088	-0.159913	0.262093	0.108827	-0.124931	0.242246	0.308361	0.336834	-0.325516	-0.324562	-0.173031	0.0720768	-0.0568303	0.00992123	-0.089181	-0.0541429
ACSBG2	0.306173	0.0928538	-0.201715	0.0544032	0.534276	0.818186	0.458794	0.332237	0.262878	-0.0284757	0.35878	0.0798809	0.083757	0.0341439	-0.331697	0.49255	0.00416667	0.679452	0.0298126	0.32716	0.251965	0.521507	-0.165799	-0.109018	0.248898	-0.195851	-0.0197762	0.0711221	-0.464678	-0.395697	-0.150352	0.0603846	-0.226139	-0.259576	-0.182451	-0.10778	-0.0986381	-0.023212	-0.312082	-0.0345498	0.0191177	-0.168177	-0.017223	0.381568	0.178029	0.0574915	0.169811	-0.194745	-0.331174
ACSF2	0.0316726	-0.321837	0.0961063	-0.101768	-0.167606	-0.136736	0.00369327	-0.525134	-0.0191509	-0.0268985	-0.110983	-0.0591599	-0.288659	0.0240787	-0.293519	-0.290684	0.022906	0.203943	0.322583	-0.0273477	-0.258537	0.460385	0.0129725	0.298709	-0.300577	-0.336614	0.0167547	-0.035686	0.199957	0.0979265	0.00430593	0.0631053	0.390242	0.226729	-0.304324	-0.324087	-0.221899	-0.139305	-0.034979	0.0932708	-0.0300834	-0.109696	-0.0614959	-0.0243434	0.0316726	-0.509917	-0.437587	0.161458	-0.339595
ACSF3	-0.0993262	0.0356937	-0.20634	-0.0733382	-0.2274	0.0434056	-0.301746	-0.0601225	-0.0150928	-0.0467903	0.00569206	0.114644	-0.0599347	0.139834	-0.125314	0.0639165	-0.176736	-0.105409	-0.292518	-0.0332625	-0.216073	-0.027987	-0.0376301	0.0571226	0.00336123	-0.074788	0.0163777	0.173458	0.101513	0.0624014	0.0163513	0.198979	0.0816927	0.0835615	-0.0347903	-0.0074934	0.0365249	0.269393	0.000872525	-0.139785	0.152799	0.0680392	-0.0229627	-0.204269	-0.0719607	-0.396121	0.0251176	0.260268	0.115695
ACSL1	-0.877134	1.13251	0.808027	0.926792	0.253304	0.339408	0.588412	-0.0111679	0.281204	-0.715639	-0.190879	-0.0991701	0.52651	-1.16592	-0.0962418	-0.311387	0.341132	-0.117015	-0.654542	-0.181694	-0.363411	-0.226256	-0.579608	0.280708	-0.100364	-0.109511	-0.926476	-0.107047	-0.0663798	0.0646085	-0.238263	-0.0227188	-0.492731	-1.31595	-0.806481	-0.299922	-0.282344	0.164005	-0.763389	0.0739348	-0.570093	-1.1206	0.26013	0.0872273	0.167345	0.400684	0.283831	-0.288104	0.0813415
ACSL3	-0.205046	-0.0221128	-0.104207	0.114909	-0.332554	-0.182374	-0.102434	-0.246367	-0.218506	-0.512725	-0.4175	-0.534826	0.0217486	0.121283	-0.130446	-0.351639	0.281841	-0.246146	0.0491622	-0.0318553	0.0865814	-0.199568	-0.374998	0.17944	-0.420592	-0.0459035	0.0674218	0.216781	0.116922	0.120611	0.183475	-0.25465	-0.366977	-0.563064	-0.294352	-0.19315	0.149107	0.105169	-0.184997	-0.192739	-0.359149	-0.0176647	-0.159874	-0.0855884	-0.20726	-0.222057	0.53259	0.316595	0.271268
ACSL4	-0.167074	0.341403	0.249836	0.434267	-0.336614	0.249029	0.0104165	-0.328206	0.0184332	-0.537661	-0.136392	-0.148048	0.0400245	-0.411564	-0.26237	-0.510778	0.663797	-0.2479	-0.422688	0.117329	0.0227407	-0.134131	-0.312385	-0.0821466	-0.79294	0.0173225	-0.145932	-0.123504	0.137679	-0.175128	-0.0302349	-0.283425	-0.79294	-0.787055	-0.522093	-0.398285	-0.282832	-0.11132	-0.534115	0.0905757	-0.385141	-0.529014	0.0386937	0.241125	-0.201443	-0.168208	0.697266	0.467293	0.302562
ACSL5	0.200772	-0.286424	-0.222896	-0.133049	-0.026498	-0.216656	0.120232	-0.26256	-0.297138	-0.536736	-0.0174454	-0.23061	-0.0149448	0.284942	-0.187037	0.0135615	0.22971	0.0742331	-0.117079	0.010846	-0.138865	-0.170373	0.0417769	-0.197931	0.0253117	0.131385	0.161114	0.0622557	0.206569	0.440064	0.259436	-0.302444	-0.283767	0.154083	-0.181775	0.0419711	0.337296	0.112509	-0.0281442	0.159622	-0.23565	0.273338	0.0438701	0.0680392	0.171582	0.0250428	-0.29788	-0.244585	0.296728
ACSL6	0.227287	0.0768537	0.0312552	0.286824	0.324062	0.368891	0.66939	0.198611	0.321745	0.379729	0.189879	-0.0492867	0.0143787	0.324416	-0.306543	0.12753	0.246043	0.763229	0.109203	0.475673	0.220601	0.317223	-0.150805	-0.437803	-0.0947856	-0.136898	0.347822	0.804168	0.410853	0.625211	0.129306	0.038979	0.252704	0.0899973	0.061959	-0.139964	0.333367	0.589191	0.345212	-0.0390149	0.0390571	0.176971	0.21385	0.167983	-0.305258	-0.329148	0.375603	0.227116	0.0841932
ACSM1	-0.11294	0.0944017	-0.252089	0.0516896	-0.058569	-0.139243	-0.0545539	0.177644	-0.107229	0.168151	-0.192571	-0.00672384	0.0249906	-0.224999	0.384238	0.0544948	-0.014217	0.0855241	0.0140699	-0.0189065	0.0659941	-0.0407689	0.238981	0.0599084	0.160038	-0.232585	-0.0368933	-0.125505	-0.0334126	-0.105409	-0.0963903	0.387636	0.0718848	-0.0188566	0.0415519	0.313299	-0.319531	0.0752186	-0.0148431	0.177644	0.0904608	-0.00400975	-0.156955	0.0192846	-0.131776	0.187525	0.0542662	-0.0804419	0.0806519
ACSM2A	-0.133899	-0.0812357	0.132975	0.00843399	-0.0612513	0.0770568	0.0392748	0.00242378	0.000187754	-0.133533	-0.0711707	0.0583234	-0.0950609	0.0582339	-0.0447046	0.316425	-0.145932	0.0277347	-0.0171858	-0.119437	-0.0675261	-0.0860421	0.225441	0.21122	0.0690285	0.118712	-0.0345026	-0.196465	0.000944081	-0.180543	-0.134261	0.0552533	0.00712696	0.089812	0.0517957	0.000303062	-0.0189639	-0.0266639	0.171172	0.0664258	0.0935707	-0.183052	-0.0295086	0.132392	0.227171	0.0929132	0.0373738	0.189826	0.202362
ACSM2B	0.0723226	-0.212239	-0.0375029	0.0141382	-0.0739864	0.0453113	0.0594258	0.12668	0.267536	-0.279018	0.121809	0.0188259	-0.164654	-0.132448	-0.153639	0.0291397	-0.0924859	-0.0365829	-0.15096	-0.22338	-0.062401	0.213806	0.0406169	0.147415	0.225932	0.0173488	-0.0395624	0.0106949	-0.346276	-0.213299	-0.157501	0.0719724	-0.031395	-0.0594218	0.0151528	-0.0193846	-0.302373	-0.22423	0.141309	0.103822	0.4432	-0.197333	-0.045375	0.0132567	-0.0597415	0.00833284	0.0254036	0.0386201	-0.143574
ACSM3	0.0952381	0.0414437	0.0108681	-0.0427433	-0.0310075	-0.108451	-0.0392537	0.0126657	-0.122197	0.408416	0.0504565	-0.0675894	-0.129923	0.0402404	-0.051179	0.116553	-0.0703658	-0.159468	-0.197077	-0.199071	-0.111118	-0.185904	-0.109449	-0.244935	0.0715515	-0.235821	0.262212	0.265586	0.111927	0.255507	0.190471	-0.123251	0.220601	-0.0159552	0.0185549	0.158175	0.376393	0.387299	0.569021	0.201137	-0.0439212	-0.18012	-0.00170994	-0.358044	-0.117925	0.0582041	0.0429007	0.142177	0.173458
ACSM5	-0.0869651	-0.0394747	-0.0444217	0.0933028	0.0721676	0.18615	-0.032639	0.0486316	0.23441	0.293245	0.30574	0.19789	-0.0952283	-0.223835	0.0452828	0.237738	0.0113498	0.21778	0.0653759	-0.0528999	0.0674501	0.0414908	0.0848991	-0.152799	0.208521	-0.0971103	-0.274332	-0.157169	-0.269968	-0.078058	-0.268485	0.263759	0.2433	0.111598	0.342946	0.256707	-0.18525	-0.122372	-0.0157991	-0.0686844	0.111383	-0.112073	-0.0215273	-0.0610755	0.209373	0.100173	0.119292	-0.0433804	-0.0700035
ACSS1	-0.0932631	-0.124198	-0.152276	-0.0878955	0.00876949	-0.138799	-0.055933	-0.0247041	-0.140504	-0.0734035	-0.171456	-0.0140179	-0.121362	0.0322902	0.0492159	0.112338	-0.158098	0.126243	-0.0267834	-0.189097	-0.200003	0.0109888	-0.0951463	-0.0416323	0.106043	-0.192612	-0.0107854	-0.0605506	-0.0267602	-0.0561884	-0.05876	0.0342465	0.300215	-0.0235411	-0.132306	-0.0250608	-0.0855295	-0.155727	0.0121879	-0.0151167	0.180311	0.0859673	-0.0202772	0.187924	-0.0944637	0.0443334	-0.131631	-0.00884763	0.00687888
ACSS2	0.0616352	-0.0489604	0.0427641	-0.0290263	-0.0260065	0.246148	-0.0663178	-0.277872	-0.105776	-0.17398	-0.0160829	0.0504827	0.283698	0.0652937	-0.089771	0.010798	-0.142131	-0.197827	-0.178575	0.0447841	-0.205427	-0.0270715	-0.0778673	0.391759	0.0528151	0.0294896	-0.243164	-0.0384278	0.0400548	-0.179456	0.0398025	-0.011647	-0.245471	0.0672775	-0.046765	0.279215	-0.0285211	-0.138932	-0.149706	0.0427099	-0.0977229	0.0928538	-0.218326	-0.102973	0.105766	0.374214	-0.363306	-0.307214	-0.348804
ACSS3	0.118217	0.170243	0.116121	-0.0327949	-0.0568052	0.0324264	-0.0433328	0.0598487	0.41329	-0.0459301	0.140267	-0.0606089	-0.106914	0.0621587	0.192897	0.107216	-0.0904648	0.165269	-0.00558178	-0.261928	-0.252512	0.109408	0.162062	-0.127771	-0.00471867	-0.184485	0.0104913	-0.311387	-0.218145	-0.0147215	-0.0435968	0.0092143	0.0291923	-0.0473363	0.247438	0.0539461	-0.15461	-0.260439	-0.169619	0.0121436	0.0253662	0.0768245	-0.254021	-0.0396163	0.0172095	-0.0178936	-0.011647	-0.110957	0.0348328
ACTA1	-0.172779	0.0231668	-0.175541	-0.0226438	-0.222449	0.0784964	-0.141988	-0.187203	-0.280028	-0.0163086	-0.128085	-0.12747	-0.207781	-0.139603	-0.182451	0.574086	-0.31281	-0.0963632	0.0616352	0.0667496	-0.319816	0.0465205	0.0489398	-0.182653	-0.14751	-0.289218	-0.0630129	0.213606	0.105291	0.355579	0.200135	0.168435	-0.0531115	0.00460575	-0.123378	0.250373	0.0320303	0.143319	0.110695	0.170748	0.123793	0.16783	0.127093	-0.296999	-0.160575	0.953579	-0.204086	0.0094296	0.0235922
ACTA2	-0.173462	-0.483528	0.445913	0.205709	-0.104207	-0.0307149	-0.078465	-0.107988	0.10665	-0.140367	0.197684	0.15297	-0.0816504	0.0501803	-0.0303513	-0.0580265	-0.0899635	-0.377764	0.0344935	0.173768	-0.319147	0.0272449	0.267597	0.246755	0.00177838	-0.0475551	-0.313352	-0.157701	0.0388875	0.109408	-0.264106	-0.141762	-0.152307	-0.0300553	-0.139209	0.187147	0.145277	-0.0857239	-0.156336	0.511928	-0.078792	-0.0778939	-0.264031	-0.039841	-0.152616	0.311885	0.0286369	-0.378045	0.0651153
ACTA2-AS1	-0.312168	0.0950762	-0.11177	-0.00659749	-0.0792296	-0.119467	0.320014	-0.103121	-0.116075	-0.143574	-0.00053052	0.173025	-0.123902	-0.0452972	-0.184997	0.0202314	0.0533821	-0.133807	0.298155	-0.133666	-0.572489	0.112856	0.272768	0.036963	-0.246877	-0.262313	0.154738	-0.0156722	0.0233888	-0.219844	-0.00707831	-0.332727	-0.529949	-0.319626	0.59755	0.0755079	0.0443072	-0.100567	-0.250574	-0.228674	-0.315468	-0.0911349	0.161665	0.373624	-0.0316107	-0.0889447	-0.00314552	-0.0283219	-0.145514
ACTB	0.366195	0.14746	0.190471	0.153188	0.41136	0.479727	0.509956	0.120369	0.287948	-0.238006	0.275044	0.265653	0.744446	0.174791	-0.0634752	-0.161767	0.400973	0.0332515	0.197595	0.204808	0.0924991	0.0589109	0.0521464	0.373878	-0.0430681	0.25426	-0.0435695	0.153227	0.169477	0.335262	0.233866	0.250078	-0.210141	0.258061	0.43885	0.242966	0.101066	0.151865	-0.00861543	0.131496	-0.232299	0.709809	0.29924	0.442224	0.469975	0.460597	-0.584699	-0.529014	-0.319911
ACTC1	-0.255402	0.299009	0.725844	0.234248	0.292189	0.32425	0.376758	0.10037	0.4355	0.482311	1.21331	1.33765	0.178083	-0.198786	0.361509	0.310018	0.108591	0.152483	0.270698	0.343592	-0.111711	0.344328	0.10329	-0.0481106	0.239094	-0.183334	-0.393704	-0.0281936	-0.00798462	0.0299094	-0.0644012	0.362943	0.206111	-0.351961	0.284799	1.06032	-0.279086	0.292455	0.082117	0.230444	0.337885	0.238308	0.180051	0.366276	0.39229	0.565123	-0.0915182	-0.185992	-0.540738
ACTG1	0.144784	0.0494397	0.0867022	0.227514	0.0505643	0.155527	0.343671	-0.0148647	0.0136334	-0.212858	0.134632	-0.0764909	0.375816	0.205424	-0.141235	-0.288238	0.313797	-0.0277756	0.292784	0.0457463	-0.0211287	0.0253117	0.00770586	0.343387	0.00482728	0.12878	0.080584	0.262878	0.235215	0.228475	0.152602	0.0309237	-0.153057	0.198337	0.104737	-0.0627935	0.0562956	0.066457	0.0709245	0.0106703	-0.232447	0.40571	0.277706	0.258261	0.162398	0.114261	-0.482171	-0.201567	-0.117744
ACTG1P17	0.176842	0.253682	0.198757	0.231783	0.104296	0.300066	0.0756858	0.198528	0.152755	0.160359	0.0739911	0.103232	0.245973	-0.0363925	-0.0366739	0.119819	0.0753108	0.283759	0.0334786	0.0668587	0.183555	0.189975	0.00606785	-0.0450867	-0.0968737	-0.112388	-0.0934922	-0.0762812	-0.065768	-0.0310421	-0.0509466	0.360549	0.162789	0.000917918	0.233707	-0.0986644	-0.141044	-0.140133	-0.120403	0.0447303	0.0812251	0.0237562	0.00562157	-0.0667205	0.150238	0.176928	-0.0300144	-0.166998	-0.0320392
ACTG2	-0.00173908	0.163146	0.348264	0.0614066	-0.0916965	0.13343	-0.126474	0.282865	0.13987	0.184224	-0.046735	0.0504565	-0.0406328	-0.0632489	0.16747	0.616805	-0.127911	-0.0308689	-0.0962696	0.0891011	-0.0497078	-0.042172	0.391098	0.0325553	0.213288	-0.210141	-0.376395	-0.182927	-0.168325	-0.190571	-0.14288	0.359311	0.079907	0.0751845	0.0271613	0.509753	-0.218614	-0.0358926	0.226729	0.717874	0.34444	0.227915	-0.22937	-0.0407426	0.503676	0.155202	-0.018754	0.257825	-0.164319
ACTL10	-0.171204	-0.328877	-0.0442951	0.0534135	-0.29488	-0.2497	-0.282676	-0.256822	-0.0848473	-0.126362	-0.319531	-0.0307923	0.109548	-0.00910421	0.280866	0.404702	-0.195931	-0.202561	-0.119953	-0.311317	0.0123334	0.0529068	0.51166	0.0579859	0.0398529	-0.021273	-0.0385006	-0.0264447	0.0900802	0.209323	-0.185208	0.0432971	-0.171708	-0.135493	0.510794	0.380742	0.00728346	-0.108249	0.0968684	0.113319	0.0907261	-0.0119167	-0.101768	-0.0051748	0.276228	-0.271856	-0.135666	0.413849	0.21366
ACTL6A	0.742933	0.0392748	-0.0515257	0.493674	0.0963648	0.0527803	0.584618	-0.171271	-0.179994	0.172837	0.31548	-0.273195	0.347992	0.252089	-0.475854	-0.214334	0.328027	-0.0542891	0.400973	0.474217	0.64215	-0.129763	-0.358936	-0.491958	-0.188673	-0.119559	0.192949	0.396034	0.552786	0.5867	0.244486	-0.481952	-0.173699	0.837557	-0.370471	-0.182009	0.241297	-0.0446763	0.327676	-0.25951	-0.301746	0.303586	0.741329	0.000332443	0.158741	-0.0519431	-0.151872	-0.513887	0.203564
ACTL6B	-0.0114691	-0.0709416	-0.128013	-0.0262556	0.0949838	-0.243736	0.15593	0.10132	0.188014	-0.027475	0.216684	0.256263	-0.145731	-0.250452	0.406809	0.426557	-0.363411	0.111486	-0.192739	-0.131383	0.0129725	0.354123	0.132551	-0.0801379	0.209465	-0.127435	-0.265909	-0.0172042	-0.196415	-0.144265	-0.0785458	-0.0941725	0.238308	-0.0565897	0.157079	0.56682	-0.160323	0.229485	0.0751845	0.369258	0.772576	-0.330126	-0.230771	0.0251176	0.111813	0.107457	0.0662088	0.128995	-0.0854699
ACTL7A	0.132551	0.107649	0.75619	-0.325786	-0.058644	0.258338	0.111284	0.334835	0.2979	0.110214	-0.190772	0.305468	0.066175	-0.178341	0.183383	0.221563	-0.329636	0.0468139	0.374333	0.027815	0.0739025	0.34328	0.382308	-0.202517	0.0971531	0.267677	-0.274823	-0.630234	-0.450272	-0.0860421	-0.264419	-0.0461313	0.433894	0.255257	0.311691	-0.131288	-0.502984	-0.309513	-0.0193307	-0.026498	0.0856532	0.0464367	-0.104361	0.0667496	0.259857	0.138619	0.00485175	-0.157343	-0.092398
ACTL7B	-0.129354	0.17217	0.308183	0.0488309	-0.383357	-0.157377	-0.107635	0.225791	-0.227203	0.362259	-0.0272825	-0.00289166	-0.0976103	-0.467545	0.0269079	0.304721	-0.301816	-0.104868	-0.0678106	-0.582428	-0.284291	0.238054	0.485217	-0.2763	0.489839	-0.378344	-0.286357	-0.143789	-0.211739	-0.18797	-0.720947	0.0296219	0.107958	0.479932	0.301703	1.23521	-0.00700678	-0.0668685	-0.110865	0.241955	0.217334	-0.374738	-0.120446	-0.360547	0.169672	0.0972746	0.181792	0.270417	0.107216
ACTL8	-0.129694	-0.334925	-0.0149717	-0.0779537	0.0316296	-0.0258279	-0.0961214	0.201085	-0.0310928	0.273909	-0.218563	0.173298	-0.618736	-0.0698419	0.256487	0.457808	-0.321587	0.321564	-0.134954	-0.0652828	-0.0410581	0.130962	0.179661	-0.195322	0.41124	0.390531	-0.170695	-0.16772	-0.449396	-0.155496	-0.330007	0.228132	0.43017	0.361867	-0.0621141	0.241125	0.125556	0.195955	0.373521	0.217379	0.416116	-0.373235	0.0363687	-0.0751707	0.127719	-0.369739	0.266557	0.151137	-0.130415
ACTL9	-0.357843	-0.357749	0.0645534	0.203843	-0.242247	-0.134261	0.104992	0.345669	0.217829	-0.257896	-0.159077	0.0160884	0.119192	-0.353961	-0.261675	0.0485703	0.0402994	-0.298599	-0.0256382	-0.323449	-0.0393621	0.308018	0.560331	-0.246317	0.0881257	-0.291481	-0.142987	-0.613826	-0.257074	0.0659367	0.0360324	-0.296999	-0.250941	-0.0413153	0.232968	0.631055	-0.720947	-0.0775739	0.170538	-0.174443	-0.0854356	0.0536781	-0.526278	0.199559	0.350764	-0.285026	-0.00379215	-0.0447046	0.161665
ACTN1	-0.298879	0.271726	0.513452	0.491179	0.192106	0.348586	0.137071	0.063012	0.300412	-0.404436	-0.0816168	0.116818	0.39578	0.083533	0.140455	0.0712937	0.199905	-0.0535724	0.175115	0.0480973	-0.167402	0.147328	0.0702719	0.505835	0.425607	0.356363	-0.055933	0.0926627	0.0355266	0.0417263	-0.0671592	0.268185	-0.152716	-0.133367	0.0347564	0.262818	0.174489	0.360889	0.167299	0.451104	-0.0503123	0.361411	0.180012	0.31159	0.197684	0.514764	-0.296062	-0.0906333	-0.399015
ACTN2	-0.124899	-0.0509218	-0.109696	0.00311771	-0.0380431	-0.123837	-0.0193846	0.132046	0.0823448	0.0555496	-0.0645149	0.172737	-0.132274	-0.209592	0.00504947	0.152846	-0.0481581	-0.0203575	0.0604207	0.0872563	-0.13587	0.0217985	0.0175478	-0.0686083	0.157495	-0.0224796	-0.161993	-0.238758	-0.128013	0.0797612	-0.128619	0.342254	0.121591	0.173025	0.167299	0.183383	-0.161177	-0.135226	-0.127407	0.0696235	0.282805	-0.0802538	0.135632	-0.258016	0.111284	0.194846	-0.0506463	0.0354501	-0.112073
ACTN3	-0.120313	0.0755644	0.0528421	0.143412	-0.199113	0.0773589	0.107726	0.337697	0.369366	-0.0790675	0.0604501	0.205424	-0.239607	0.0393252	0.0500081	0.092695	0.0300367	-0.359924	-0.255573	-0.299251	-0.0255524	0.172519	0.171704	0.00554565	-0.253748	-0.141988	-0.307608	0.240872	-0.0291044	-0.297577	-0.0959674	-0.133635	0.228071	0.371976	0.661648	0.0107497	-0.280234	0.107183	0.0827534	0.128459	-0.112234	-0.290402	0.261619	0.361592	-0.0168411	0.229387	-0.129858	-0.333228	0.0331289
ACTN4	1.3096	0.301703	0.135362	1.0131	0.865131	0.672575	0.900553	0.0512857	1.13251	-0.458011	0.535088	1.63944	1.22413	0.0787685	0.687798	-0.0565897	0.507693	0.280787	0.708258	0.310172	0.140533	0.561362	1.87226	0.584981	-0.0246796	0.647194	0.0324791	0.133985	0.235113	0.234081	0.0574058	0.465635	-0.321837	-0.113731	1.17221	1.33059	0.162123	0.307399	-0.290859	0.169811	-0.142658	0.0970296	0.424154	0.222061	-0.160068	0.377823	-0.361088	-0.261428	-0.439462
ACTR10	-0.200697	0.0484606	-0.00780738	-0.226208	-0.478532	-0.300287	-0.25626	-0.137937	-0.366524	0.280326	-0.331174	-0.386218	0.136311	0.0369928	-0.637478	-0.0917524	-0.056777	-0.335694	-0.437587	-0.0923556	-0.0996951	-0.494271	-0.450272	-0.0885592	-0.0321002	-0.00854057	0.297229	0.180145	0.449329	0.180906	0.348374	-0.631458	-0.0407146	-0.0487692	-0.406095	-0.163049	0.333748	0.0500359	0.484314	-0.566636	-0.208475	-0.539744	0.113063	-0.144244	-0.488588	-0.173776	-0.303196	0.00285616	0.0142085
ACTR1A	-0.0711129	0.0238341	0.173298	-0.119532	-0.0302575	-0.0368661	-0.147205	0.00511817	-0.155979	-0.192702	-0.115048	-0.0322958	-0.0290785	-0.0709061	0.0714781	-0.0822295	-0.155687	-0.0583821	-0.118226	-0.162525	-0.301897	0.0407194	-0.0632999	0.0841635	0.0266525	-0.0596029	-0.254928	-0.33482	-0.0558817	-0.0986094	-0.0958298	-0.100692	-0.270985	-0.0818326	-0.259823	-0.0656845	0.00228447	-0.0978954	-0.296999	0.103506	-0.0120112	0.0497327	-0.126092	-0.0451792	0.0795968	0.0952381	-0.198107	-0.00811054	0.079137
ACTR1B	0.213007	-0.336804	-0.188211	-0.0855884	0.100766	-0.0582037	-0.131319	-0.334649	-0.223129	0.0529302	-0.120283	0.0467893	0.0168359	0.267677	0.214956	-0.106199	-0.035782	-0.0263383	0.189739	0.0372893	0.0951714	0.0667496	0.129344	0.176044	0.103571	0.184659	0.25693	-0.066595	0.324772	0.0853291	0.181072	0.00195571	-0.00970381	0.112856	0.1111	-0.0728177	0.117807	0.37818	0.447644	-0.0848768	-0.00933166	-0.100692	0.169139	-0.271258	0.242469	0.0698091	-0.128013	0.0767046	-0.114711
ACTR2	0.192408	0.325991	0.273159	0.529794	0.145357	0.497544	0.158371	0.035147	0.471221	0.144851	0.284405	-0.0648043	0.247841	0.117699	0.20733	0.0518215	0.618784	-0.109511	0.0480358	0.45602	0.282585	0.161946	-0.13057	0.392765	-0.0140616	0.252396	0.0547351	0.126062	0.154418	0.281546	0.157378	0.184483	-0.0238187	0.32215	-0.113104	-0.0447574	0.100606	0.176396	-4.93e-05	-0.0581477	-0.176473	0.30574	0.259175	0.509263	0.130076	0.0357222	0.00580922	-0.0243936	0.190372
ACTR3	0.275759	0.248004	0.0982269	0.288739	0.0228816	0.223545	0.28698	0.0347288	0.160597	0.092231	0.270836	-0.262194	0.447096	0.172989	-0.00651941	-0.167646	0.649886	-0.124489	-0.0422178	0.111639	0.307663	-0.152988	-0.312168	0.0539461	-0.0539407	0.144851	0.0962058	0.066175	0.205226	0.19865	0.225735	-0.252287	-0.231788	0.00810491	-0.269143	-0.0637319	0.114607	0.0254828	0.0874449	-0.259148	-0.297958	0.107762	0.226454	0.145518	-0.0806381	-0.118129	0.0222365	-0.246146	0.201378
ACTR3-AS1	-0.151836	-0.138112	0.208306	-0.302681	-0.154407	-0.222363	-0.214226	0.0209759	0.120001	-0.147724	-0.138799	-0.154546	0.439511	0.183283	0.00427493	-0.0658462	0.143276	0.0693147	0.243246	-0.288659	-0.228218	0.0562702	0.0814237	-0.281764	-0.224999	-0.207611	0.280504	-0.0492867	0.180983	-0.194046	-0.088849	-0.118872	0.790938	-0.373787	-0.0355608	-0.247793	0.219469	0.0599733	-0.102311	-0.17787	0.20246	-0.0516018	0.370092	-0.460638	-0.456628	0.387299	-0.028837	0.228415	-0.117677
ACTR3B	0.141157	-0.0901434	0.22332	-0.000956499	0.102948	0.0746804	0.163278	-0.157031	-0.105294	-0.031395	0.111222	0.0294377	0.05776	0.0811641	0.33466	-0.24511	-0.163049	0.139403	0.0796256	-0.210141	0.0426186	0.100138	-0.101955	0.157935	0.055368	-0.111675	0.199208	0.110863	0.143527	0.162789	0.0145798	-0.167814	-0.0837899	-0.0937541	-0.172297	0.0134886	0.344538	-0.0508435	-0.0568598	-0.0576821	-0.122764	0.0667152	0.202905	-0.0806694	-0.163386	0.166996	-0.207221	-0.0803663	0.0338494
ACTR3BP2	-0.140133	0.622866	-0.166998	0.178655	0.640656	1.06706	0.175292	0.113263	0.427231	0.21436	0.29464	0.150564	-0.158714	-0.158785	-0.0515257	0.116332	-0.0365255	0.103418	-0.0494525	-0.0339853	-0.0207419	0.00182531	-0.243628	-0.183885	0.106722	-0.23476	-0.191451	-0.159297	-0.181655	0.271024	-0.103837	-0.0246089	0.118049	1.26703	0.00918505	0.144816	-0.287588	-0.70446	0.222939	-0.169743	0.285924	0.14946	0.253562	0.271435	0.0288474	0.208471	0.363248	0.0759606	0.0438082
ACTR3BP5	-0.209005	-0.0181024	0.211474	-0.0716647	-0.231616	0.347004	0.0370449	-0.117255	0.164092	0.235215	0.091483	0.0902796	-0.118194	-0.00209448	0.0507989	-0.0670544	-0.161889	-0.135699	0.113585	0.172989	-0.076197	-0.0974114	-0.00586523	0.0732925	-0.0944888	-0.155644	-0.358044	-0.409492	-0.0510955	0.259	0.0142353	-0.33302	0.0144527	-0.00723256	-0.171708	0.572507	-0.214801	0.196005	0.070806	-0.169858	0.417044	0.0287378	-0.169287	-0.153673	0.0641358	0.243905	-0.144888	-0.00793562	0.00228447
ACTR3C	-0.207032	0.422853	-0.319718	-0.179881	0.122498	-0.316482	-0.0612018	0.0291657	-0.0176128	-0.0583294	-0.258188	0.102626	-0.156018	0.041201	0.195224	0.0775007	-0.202376	-0.295656	-0.176687	0.135965	-0.183653	-0.144244	0.349372	-0.157729	0.252453	-0.0590576	0.241601	0.156745	-0.331522	-0.0494525	0.188376	0.110344	-0.0658462	-0.301746	-0.0888799	-0.00649265	0.234136	-0.242135	0.167392	0.222939	-0.0572584	-0.0561662	0.301299	-0.198988	0.264361	0.131385	0.148916	-0.040203	0.214797
ACTR5	-0.00361112	-0.0298898	-0.0539861	0.0180377	-0.0609423	-0.0906649	-0.0304447	0.0621094	-0.125473	-0.34132	-0.00350687	-0.031167	0.0731434	0.24795	-0.111419	-0.303573	-0.0725497	0.106147	-0.0283981	0.0730329	-0.125875	0.020602	0.0872563	0.0741361	0.0113249	-0.052064	0.286066	0.212517	0.0957558	-0.07542	0.135298	-0.157102	0.0472938	-0.256398	-0.116675	-0.242735	0.00421854	0.0360324	0.266911	-0.146735	-0.0177901	-0.0700887	-0.234096	-0.457202	-0.439832	0.316595	-0.195851	-0.0952283	0.122539
ACTR6	0.241955	0.0683447	-0.0186853	-0.0829141	-0.339316	0.11048	0.071716	-0.0153822	0.0949838	0.488251	0.167732	-0.0724751	0.258747	0.21778	-0.111016	-0.201324	0.466574	-0.125411	-0.0646755	0.231104	0.48318	-0.16454	-0.190814	-0.638081	-0.448463	0.29931	0.440233	0.28698	0.0472938	0.427231	0.265586	-0.643554	0.13194	0.142783	-0.079491	-0.120842	0.577136	0.170283	-0.0653697	-0.627935	-0.259268	-0.286567	0.237624	-0.316772	-0.48623	-0.306721	0.34328	-0.210987	0.240995
ACTR8	0.414121	0.140033	-0.104646	-0.163597	0.255316	0.26319	-0.00949117	0.139361	0.0864598	0.00874259	0.204577	-0.021876	0.261556	0.242851	0.13987	0.0206596	0.324602	-0.020816	0.103571	0.481137	0.385722	0.0557679	-0.215853	0.228304	0.0962383	0.405382	0.0613176	-0.0270958	0.225321	0.179749	0.0516001	-0.0434359	-0.110074	0.0342465	-0.262883	0.0175941	0.231783	0.250603	-0.195364	0.042533	-0.0834971	0.146966	0.261305	-0.0992035	0.13651	-0.0463347	0.0637468	-0.0059128	0.261619
ACTRT2	0.0961688	0.069953	0.2702	0.446897	0.617307	-0.0483678	0.0129472	-0.019914	-0.26733	0.000492043	0.378395	0.0455837	-0.0254069	0.0720231	-0.00962867	0.221439	-0.264166	0.138365	-0.202485	-0.163712	0.000705828	-0.0720678	0.461431	0.0112016	0.0576591	0.0325018	-0.254076	-0.296999	-0.144129	-0.113409	-0.152946	0.295475	-0.0604004	-0.100543	0.238123	0.241601	-0.201324	-0.212858	0.197297	0.410108	0.0774723	0.015512	-0.36525	0.12668	0.523504	0.693074	0.0965941	-0.357843	-0.187084
ACTRT3	0.204169	0.0821694	0.240334	-0.0459301	-0.0672573	-0.0834971	-0.237583	0.131047	0.00409845	0.0837268	-0.207693	0.0557679	-0.176687	-0.133049	0.0285255	-0.0720149	-0.433376	0.463583	0.12779	-0.0407921	-0.215947	-0.0675894	0.0158639	-0.324453	0.00567272	-0.115252	0.00786483	0.188793	-0.672508	-0.572955	0.0686044	0.47512	0.147033	0.277033	-0.127771	0.104581	-0.575165	-0.222057	0.383449	-0.1035	0.132792	-0.122955	-0.605379	-0.484245	0.352274	0.0648596	0.413399	0.596653	0.456867
ACVR1	-0.00834996	0.535722	0.790938	0.0640505	0.689163	0.231407	1.00272	-0.0954676	0.0475958	0.0443072	0.323782	-0.138613	-0.40781	0.307922	-0.343432	-0.180735	0.167701	0.202264	0.248305	0.45846	0.781887	0.270698	-0.809958	0.15753	-0.20261	-0.0794041	0.202511	0.299009	0.502058	0.376897	0.31248	-0.397692	-0.35209	-0.0634478	-0.288591	-0.589813	0.292954	0.165099	0.303492	-0.134447	0.033793	0.282805	0.440445	0.418231	0.102595	0.00331036	0.189373	-0.142987	0.181754
ACVR1B	0.154337	0.242851	0.130562	0.123179	0.154947	-0.153202	-0.100017	0.0556768	0.0811292	-0.125278	0.132082	0.0425607	0.228585	-0.0120372	0.306345	0.0645211	0.0465717	-0.0836152	0.0540029	0.0888108	-0.202485	-0.118194	-0.0011979	0.31408	-0.0809117	0.0331289	-0.194786	-0.0714771	-0.0946974	-0.0140179	-0.0284494	0.236697	-0.201892	0.0422383	0.0165316	-0.0446509	-0.279242	-0.0937541	-0.143574	0.0906364	-0.153029	0.123606	-0.0693091	-0.118901	0.029833	-0.0905216	-0.0291828	0.13642	0.147684
ACVR1C	0.0758117	-0.346807	-0.209907	0.851205	0.253562	0.159267	0.810509	0.287874	-0.0527107	0.738761	0.0463231	0.0454753	-0.215533	0.464214	-0.245173	-0.0740449	0.757944	0.336834	0.238669	1.10687	1.13704	-0.241051	-0.0766126	-0.440558	-0.0317801	-0.428333	0.437224	0.827196	1.13704	0.874307	0.24045	1.18729	0.405556	-0.139102	-0.128085	-0.0414522	-0.0524635	0.280577	0.389407	-0.173066	-0.0641527	0.318663	0.089744	-0.113011	-0.104502	-0.0323242	0.51849	0.35169	0.452711
ACVR2A	0.714056	0.123275	-0.148218	0.212229	0.0252547	0.181194	0.488716	0.110251	-0.169694	-0.156597	-0.140611	-0.0157991	0.00999584	0.197109	0.233097	-0.658696	0.0092143	0.0869237	-0.0255097	0.505372	0.111667	-0.383727	-0.246707	0.271777	0.385852	0.592656	0.214747	-0.445694	0.316595	0.527094	0.245578	-0.180819	0.125352	-0.337019	-0.338655	-0.279582	0.0591273	0.101165	0.0984602	-0.189009	-0.322529	0.105563	0.0135104	-0.384992	-0.0250829	0.0468391	-0.164577	-0.159536	0.353637
ACVR2B	0.263325	0.261379	0.273984	-0.0916349	-0.066595	0.342669	0.493828	0.112682	0.107104	0.107688	0.349158	0.281009	0.237573	0.158097	0.0423168	0.0451489	-0.0594779	0.317638	0.107726	0.315579	0.156369	0.125688	0.163056	0.0155715	-0.132797	-0.00363218	0.140079	0.208896	-0.00990055	0.210111	0.066457	0.0880949	0.104509	-0.131383	0.0765095	-0.128312	0.0314389	0.0384232	0.0493266	0.445546	0.0397493	-0.102268	-0.216809	-0.0457568	0.240747	0.0489975	0.219904	-0.0929561	-0.23662
ACVR2B-AS1	0.277033	0.0700783	0.172788	0.274259	0.497248	0.517999	0.555811	0.137392	0.370771	0.528879	0.339482	0.772576	-0.0140866	-0.443047	0.392538	0.609515	0.11048	0.646089	-0.11157	0.222884	0.167916	0.259622	1.77352	-0.14397	0.231357	0.0106174	-0.394397	-0.505588	-0.189709	0.0817871	-0.589172	0.267206	0.185952	0.426557	0.439195	0.40205	-0.592613	-0.320475	0.269548	0.144468	0.859895	-0.191607	-0.143358	-0.24202	0.267927	0.39421	0.396687	-0.47762	-0.211325
ACVRL1	-0.350299	-0.184088	-0.191159	0.0143547	-0.0258005	-0.129125	-0.176066	0.0804708	0.0376483	-0.0985258	-0.210558	-0.00179276	0.0156931	-0.50768	0.0863413	0.0871278	-0.371231	0.0863071	-0.192186	-0.0043283	-0.555461	-0.188892	0.358209	0.0617571	-0.0694547	-0.277558	-0.243413	-0.103321	-0.148528	-0.216325	-0.180735	0.0200795	-0.237086	0.428057	0.54237	0.181754	-0.377927	-0.442211	0.0258389	0.0701401	0.164233	0.0368313	-0.036197	-0.0885592	-0.0300834	0.333005	-0.0531658	-0.146223	-0.127693
ACY1	-0.452237	-0.258424	0.0506214	-0.111261	-0.0160058	-0.391745	-0.40387	-0.278565	-0.407316	-0.189788	-0.128048	0.310627	-0.247271	0.020602	0.238249	0.702872	-0.652432	0.187432	-0.383602	-0.119735	-0.268228	-0.145194	0.471971	0.104161	0.235838	-0.234592	0.00300681	-0.0222399	-0.116075	-0.19986	-0.0815118	-0.14475	0.018459	-0.0902652	0.0857139	0.167916	-0.0612018	0.385505	0.138516	0.426408	0.258466	0.130351	-0.0842594	0.0402694	0.18044	0.0346386	-0.135456	0.151083	0.188502
ACY3	0.154906	-0.0573698	0.127858	0.100766	0.124067	0.0400245	0.0409359	0.139403	0.0512857	0.451402	0.088583	0.467081	0.0538582	-0.0649226	0.0105928	0.386869	-0.23264	0.240747	-0.0182309	0.0164287	-0.315759	-0.0176374	0.172219	0.188942	0.383198	-0.0762572	-0.0312437	-0.174942	-0.0971103	-0.156499	-0.348804	0.155202	0.168435	0.188245	0.188339	0.130076	-0.142782	-0.13488	-0.257012	0.119132	0.172014	-0.217109	-0.406712	0.13921	0.278884	0.225887	0.0884651	-0.049931	0.00664248
ACYP1	0.448752	0.203801	0.200728	0.199261	-0.352844	0.0766742	0.462796	-0.0557376	-0.11402	-0.0857239	-0.103745	-0.113157	0.140871	1.13704	-0.451399	-0.627935	0.912002	0.396687	0.00140174	0.269393	0.231296	0.656595	-0.212087	-0.184224	-0.107751	0.863746	1.29172	1.44101	0.546967	0.790938	0.820443	-0.0578593	0.481912	0.0568775	-0.164883	-0.255697	1.06032	1.18729	0.892138	-0.240289	-0.636184	0.444536	1.37156	-0.0586171	0.00803579	-0.334063	-0.364533	-0.208567	-0.322098
ADA	0.156788	-0.180413	-0.222847	-0.69205	-0.348604	-0.599821	-0.14288	-0.0179202	-0.359274	-0.524543	0.00521267	-0.255402	-0.376776	0.335262	-0.742553	-0.202753	0.107323	0.428723	-0.504575	-0.234705	-0.183844	0.0246073	-0.128873	-0.568407	-0.182412	0.209323	-0.0276861	0.00664248	0.264772	0.481675	0.19015	-0.103962	-0.170892	-0.0105929	-0.171456	-0.3176	0.192158	-0.256201	-0.491695	-0.158526	-0.493302	0.19789	-0.0797128	-0.241947	0.524359	-0.33874	0.24385	0.452147	0.261426
ADA2	0.38115	0.14904	-0.0274503	-0.490354	0.0806096	-0.198277	0.0905223	-0.315468	-0.22435	-0.201715	0.222498	-0.158824	0.330434	0.393015	-0.00910421	-0.434245	0.965436	-0.0441381	0.598423	0.505589	0.147866	-0.0561138	0.0426732	0.294718	-0.386979	0.29464	0.0681254	-0.00923629	0.281613	-0.0171084	1.05475	0.00918505	-0.219113	1.00272	0.297534	-0.171343	0.528584	0.209828	-0.131117	0.247497	-0.434781	1.21331	0.194501	0.924609	0.657772	0.676737	-0.419792	-0.618177	-0.467545
ADAD1	0.132833	0.196097	0.221082	0.0879926	0.206569	0.144394	0.216684	0.36466	0.0338735	0.134392	0.148298	0.0445229	0.0945708	-0.349893	-0.0879547	0.0837878	-0.0318553	0.401358	0.0301916	0.33909	-0.109018	0.13921	0.0457727	0.164133	0.191009	-0.228518	-0.248431	-0.0604733	-0.36239	0.159374	-0.135753	-0.160806	0.0444999	0.0339048	0.119159	-0.0689957	-0.042347	-0.382083	-0.055684	0.116982	0.47806	-0.00176633	-0.0627295	-0.0237456	0.138013	0.18688	0.0718294	-0.212038	0.000332443
ADAD2	-0.0949237	-0.0880826	-0.135699	-0.517394	-0.260562	-0.500396	-0.689357	-0.228726	-0.0841462	0.411829	-0.0662014	0.36177	-0.779886	-0.194745	0.0362498	0.0999195	-0.745731	0.183863	0.12686	0.0361168	0.146797	0.283621	0.200135	-0.0471224	0.184316	0.256996	0.117699	0.0201554	-0.0789309	-0.122261	0.0196103	-0.104555	-0.157927	0.371026	0.117161	0.0625253	-0.240994	0.453305	-0.178705	0.0861182	0.533745	-0.201677	0.156369	-0.0161317	0.0353654	-0.181569	-0.245471	-0.0343574	-0.373341
ADAL	0.150065	-0.00798462	0.0745453	0.190064	0.245727	0.0983895	0.0957216	-0.00449433	0.205615	0.126132	0.0684065	0.28629	0.172052	0.157124	-0.0900929	-0.102619	-0.0091274	-0.0725011	0.20022	0.119159	0.0568473	0.0127468	-0.19362	-0.14044	-0.0336054	-0.0888205	0.0440231	0.149312	0.105496	0.180051	-0.0887966	0.0333898	0.280787	0.0506214	-0.263487	-0.0277122	-0.294209	-0.0990476	-0.081029	-0.11705	-0.050201	0.239848	0.100809	-0.24475	-0.0659763	-0.14054	0.000995458	-0.152456	0.0112794
ADAM10	-0.198825	0.486072	0.676737	-0.129656	-0.333511	0.136659	0.359557	0.0210763	-0.318298	-0.222539	0.52094	-0.325516	0.393815	-0.00530245	-0.189788	-0.0215273	0.279271	-0.221185	-0.456628	-0.153238	-0.0157991	-0.190073	-0.679744	0.0174518	0.109708	0.897351	-0.111967	0.0952971	-0.0645766	0.26774	0.284238	-0.163918	-0.0991154	0.0872947	-0.11544	-0.249922	0.37467	0.29956	-0.0262088	-0.195851	-0.143323	0.189459	0.105696	0.114836	0.0215967	0.298787	-0.260925	-0.0599127	-0.11429
ADAM11	-0.00584155	0.0542662	0.139324	-0.217441	0.0680392	0.0806686	0.00677665	0.0509193	0.0444105	0.17888	0.136817	0.209323	-0.379354	-0.141613	-0.054809	0.361509	-0.187627	0.136692	0.138754	0.0478914	-0.404728	0.179166	0.0551009	-0.191488	0.0808145	-0.0367	-0.282906	-0.140044	-0.35817	-0.19574	-0.216385	0.00710337	0.0374005	0.132551	0.132082	0.473344	0.0212597	-0.050046	0.0795968	0.127564	0.438169	-0.00627743	0.175609	-0.00864001	0.162062	0.231167	-0.0447812	0.0207911	-0.177381
ADAM12	0.114607	0.118997	-0.0912641	-0.0674992	0.123179	0.109579	0.516769	0.364532	0.376656	0.128743	0.278054	0.12686	0.19157	0.49602	0.0117514	0.14946	0.247438	0.3439	0.461884	-0.107406	-0.106815	0.505835	0.0113065	-0.074398	-0.166812	0.0121665	0.0797612	0.371026	0.0621094	0.236367	-0.0667766	0.115511	0.00743106	0.259375	-0.0386231	-0.169941	0.202307	-0.0121897	-0.0429632	-0.00634868	0.313718	0.128556	0.163402	-0.133533	0.0681616	-0.0158262	0.361968	0.345212	-0.00361112
ADAM15	0.450403	0.0975329	0.32716	-0.234921	0.043508	0.0250677	-0.236209	0.152519	0.19848	0.0590641	0.0215246	0.373878	-0.0665668	-0.524289	0.25146	0.224908	-0.127601	0.314591	0.249396	0.0788026	-0.137575	0.365597	0.30062	0.0621907	-0.0895742	0.0403816	-0.282419	-0.150458	-0.296616	-0.203636	-0.203418	0.324966	0.15327	0.261496	0.39229	0.13751	-0.0939143	-0.188097	0.0671076	0.0949838	0.300412	0.0780785	-0.485229	-0.006253	0.253617	0.105621	-0.0126945	-0.320217	-0.408406
ADAM17	-0.0167904	0.462982	-0.0380993	0.106589	0.113247	0.257825	-0.15276	-0.0447339	-0.0199864	-0.371481	0.0997321	-0.177746	0.270478	-0.0790383	-0.04302	-4.93e-05	0.179275	-0.198908	0.171375	0.0867333	-0.0952931	-0.222747	-0.294051	0.194846	0.141893	0.0621907	0.0285521	0.136624	0.105978	-0.0126945	0.0504287	-0.229882	-0.062485	-0.0194398	-0.236209	-0.164844	0.0289244	0.380897	-0.00641849	-0.138404	-0.0752841	-0.0479441	0.418074	-0.06387	-0.107928	0.0516001	0.184133	0.0588843	0.506043
ADAM18	-0.104738	0.138867	-0.0275744	0.0178638	0.010822	0.0947639	-0.0658697	0.126526	-0.18404	0.178344	0.432223	0.276447	-0.189097	-0.0954376	0.195	0.0505643	-0.117677	0.112983	-0.150279	-0.109568	0.0844434	-0.100513	0.0607253	-0.147025	0.0494397	-0.241176	-0.254021	-0.0346702	-0.355217	-0.0830421	-0.129588	0.0380008	-0.0143276	0.288958	-0.0286908	0.123423	-0.150458	-0.0185781	0.105291	0.245902	0.122463	-0.154753	0.0786502	-0.324797	0.063999	0.0490233	0.10783	0.144233	-0.00350687
ADAM19	-0.0243434	0.374454	0.0814237	0.445546	0.690901	0.454947	0.270698	-0.081889	0.02378	-0.399614	-0.102404	0.0364236	0.028248	-0.0163086	0.399593	0.0134886	0.189517	0.0331033	-0.0660923	-0.0201621	0.0717978	0.565998	0.194059	0.331395	0.369366	0.163325	-0.172817	0.142133	0.00611221	0.0785889	-0.0179202	0.0393252	0.0242868	0.0972138	0.0588221	0.142851	-0.0634179	0.0760229	-0.20547	0.321667	0.00720785	-0.124641	0.419279	0.0842488	0.11726	-0.109598	-0.425354	-0.245345	-0.391252
ADAM1A	0.554774	0.551255	0.419729	0.534276	0.46017	-0.132041	0.363248	0.224295	0.0434853	0.00573409	0.547343	-0.146223	0.712658	1.11963	-0.0534636	-0.420735	0.0640505	0.724156	-0.0853238	0.215686	1.08646	0.422535	-0.436127	0.161375	-0.286844	0.0954733	0.842737	0.984956	0.915899	1.04578	0.926792	-0.2267	0.126632	-0.0769574	-0.717843	-0.611589	0.914976	0.827196	0.38538	-0.289385	-0.216236	0.497788	1.26148	1.10687	0.699492	-0.177118	-0.389965	-0.306141	-0.340866
ADAM2	-0.145857	-0.0358644	-0.026498	0.162968	-0.239201	0.100978	-0.0636436	0.0716812	0.154947	0.194408	0.00161865	0.149646	-0.36492	-0.0924575	0.0134418	-0.0358926	0.0836251	-0.0625417	0.188293	-0.388983	-0.121767	0.105132	0.13343	-0.167037	0.179749	-0.128815	-0.0702833	0.22132	0.0587313	-0.0545228	0.0976576	0.474687	-0.266975	0.0332237	-0.0132924	0.444874	-0.20391	0.0945708	0.352874	0.144	-0.0183034	-0.0832366	0.0764436	0.120681	0.132722	-0.146695	-0.057888	-0.0448424	-0.0185781
ADAM20	0.060843	0.114232	-0.0892142	0.261556	0.212431	-0.101797	0.450582	0.156572	0.047125	-0.0692185	0.158491	0.0248648	0.00717882	-0.125239	0.178698	0.24136	-0.234806	-0.0776696	0.330434	0.169304	0.184843	0.118997	-0.0642339	-0.190879	-0.0733057	0.0292411	-0.395403	-0.313352	-0.286424	-0.168469	-0.306141	0.265091	-0.0542099	0.00472881	0.135401	0.061959	-0.148626	-0.379726	0.0195347	0.495563	0.472889	-0.0817074	0.0977911	0.11237	1.0158	-0.0225932	0.374454	-0.0858957	-0.160614
ADAM21	0.332704	-0.0911349	-0.0685836	-0.190328	-0.19779	0.205056	0.113483	-0.0335493	-0.109478	0.108456	0.0689743	0.845435	0.0924272	-0.335018	0.0267072	0.064457	0.0594801	0.0981695	-0.157701	0.177644	0.270899	0.104056	-0.0592113	-0.433719	0.0784359	-0.175696	-0.244372	-0.0335028	-0.371804	-0.0741017	-0.426305	-0.0727046	0.66879	0.239336	0.306252	0.0412536	-0.0477896	-0.0409218	-0.299342	0.0235706	0.116442	0.0769525	-0.00884763	-0.0715023	0.185818	0.545282	0.078917	-0.136469	-0.176153
ADAM22	0.060356	0.114644	0.0484876	0.0584065	0.194164	0.186919	0.197595	0.150849	0.254863	0.0697791	0.224054	0.107541	-0.0454837	-0.0156286	-0.0700587	0.0670564	0.0323627	0.219326	0.127827	0.0991044	0.0499789	0.0997004	0.1848	-0.0270252	0.00955136	0.0565836	-0.0239613	-0.00476642	-0.0656845	-0.000781688	-0.150031	0.129455	0.0518767	0.0994866	0.252341	0.111222	-0.0460993	-0.0718755	-0.0456561	0.033367	0.0775322	-0.0529266	0.0291397	0.106072	0.112618	0.201029	0.115184	0.000167998	-0.0266639
ADAM23	6.45e-05	0.259934	0.141343	0.00974712	0.379355	0.353402	0.897351	0.21339	0.252771	0.0983576	0.313299	0.301453	0.084542	0.0786185	-0.0129806	-0.00549903	-0.0126195	0.338602	0.0910184	0.0731434	0.267804	0.0338188	-0.0416089	0.144468	0.0459875	0.159468	-0.0054303	-0.131088	-0.0775427	-0.182813	0.0631053	-0.0225723	-0.1459	-0.181237	0.0168086	-0.162525	0.0104401	-0.0942903	0.0143241	0.0327796	0.0856866	0.16978	0.131981	0.00135122	-0.0433109	-0.128218	0.0993292	-0.136598	0.0747173
ADAM28	-0.384334	-0.0518936	0.0567099	0.0511221	0.915899	1.03509	-0.0321726	0.276369	0.209137	-0.0167716	0.62802	-0.202429	-0.216758	0.06096	0.204418	0.00480051	0.267994	-0.529323	0.192763	-0.0265904	-0.137144	0.759834	0.00148441	0.426223	0.110624	0.252148	0.106413	0.0115514	0.197684	0.287397	0.109129	-0.0942013	-0.226853	0.757145	-0.037909	0.0514559	0.259375	0.0271107	0.0742598	-0.314468	-0.409999	0.458936	0.137474	0.0489975	-0.14751	-0.0945835	0.0906953	0.158567	0.387777
ADAM29	0.326454	0.184843	0.409421	-0.00824362	0.256434	-0.0428809	0.0113065	0.498797	0.154337	0.295747	0.184938	0.596653	-0.274391	-0.0271684	0.42141	0.343671	-0.203085	0.270478	0.0098448	-0.129953	0.108494	0.102498	0.379586	0.0565836	0.196233	0.108456	-0.336614	-0.199611	-0.288852	-0.152914	-0.395977	0.872369	0.267276	0.178029	0.126507	0.479386	-0.138171	-0.430881	-0.242877	-0.100567	0.218441	0.115431	-0.0733731	-0.178389	0.21778	0.177604	0.142813	0.00369327	0.0367738
ADAM30	-0.0371033	-0.0701722	-0.101981	-0.0291828	-0.0276389	-0.0757877	-0.0873981	0.0191519	-0.020718	0.0211543	0.0290553	-0.0308147	-0.092398	-0.0533616	-0.199251	0.293619	-0.0249054	0.105053	-0.0999076	0.225217	-0.0350768	-0.0767747	0.118217	0.0785889	0.18115	0.0213413	-0.0947335	-0.178867	-0.150001	0.0922937	-0.0608063	0.281484	0.0304217	-0.104555	0.0704261	0.0710264	0.000467335	-0.309427	-0.122063	0.238249	0.0327796	-0.0897463	0.0509498	-0.0672348	-0.0921001	0.451958	-0.00848257	-0.0332096	-0.209142
ADAM32	0.28094	0.15829	0.0302741	0.0465466	0.213235	0.183605	-0.0639858	0.247222	-0.00848257	-0.0894846	0.0547351	0.19824	0.132655	-0.0931181	0.109365	0.190064	-0.0893322	-0.0126195	0.156664	0.189329	0.0683154	0.0976243	-0.0816504	0.221977	-0.10999	-0.226302	-0.111911	0.0158418	-0.092614	0.000756924	-0.0782998	0.263967	-0.174443	0.0430915	-0.0542644	0.0678705	-0.435783	-0.243515	0.19175	-0.0737204	0.132328	0.178126	0.0427099	0.0935366	-0.0322197	0.0799352	0.00151848	-0.0337898	-0.0742872
ADAM33	-0.010807	-0.072733	0.0843483	0.14904	0.0464058	0.0541207	0.304721	0.0436468	0.104737	0.205515	0.106011	0.010846	0.0430915	0.0335976	0.134529	-0.124604	-0.108828	-0.265223	0.112125	-0.177536	0.114402	-0.118872	0.00316434	0.377478	0.0453113	-0.076131	0.0013282	-0.23742	0.00447179	-0.110321	0.0778665	0.32582	0.0297803	0.0812568	0.230592	-0.201324	-0.389599	-0.065111	-0.241763	-0.117949	-0.128378	0.0372893	0.161585	-0.00614378	0.00830221	0.047125	0.0944657	0.0146028	-0.150458
ADAM3A	-0.171899	-0.0563303	-0.077005	-0.0230117	0.0887412	0.154337	-0.0986094	-0.0396922	-0.110469	-0.0600119	0.0331289	0.0871278	0.0211543	0.0401326	-0.0989292	-0.0922923	0.0529068	-0.0416826	-0.0487071	-0.202517	0.0497018	-0.00053052	0.188462	0.0731434	0.0479469	0.419279	0.0434853	-0.0394747	-0.00506267	-0.10405	-0.0700887	-0.0537039	0.188547	-0.0434054	0.133697	0.12659	-0.0271221	-0.0553972	-0.0316537	0.0832637	0.0903384	0.171214	0.123755	-0.0260555	0.304018	0.234461	0.14311	0.215062	0.0563721
ADAM5	0.00536148	0.0505353	-0.0614694	0.254381	0.30342	0.0643791	0.108948	0.518792	0.21122	0.0224663	0.254381	0.331547	-0.00206847	-0.056641	-0.307526	0.167951	-0.051179	0.0783746	0.12964	-0.0543902	0.367353	0.390242	0.127451	-0.120553	0.167617	-0.158331	0.0297011	-0.0619946	-0.08034	-0.166072	-0.180456	0.504137	0.45642	-0.191801	-0.0686614	0.417543	-0.417362	-0.00965474	0.136855	0.125923	0.270478	-0.292455	0.0442436	-0.308298	0.106688	-0.0260065	0.209041	-0.141334	-0.103837
ADAM6	0.117415	0.107183	0.17742	0.107029	-0.0190853	0.0616352	0.102163	0.475673	0.254046	0.424154	0.220232	0.198376	-0.00558178	-0.813608	0.0217985	-0.015727	-0.266865	0.0296484	0.183066	-0.119289	0.4004	0.477361	0.110906	0.274444	-0.542864	0.150644	-0.293519	-0.133765	-0.289472	-0.510194	-0.617097	0.505589	0.211176	0.0500944	0.0479469	0.0447841	-0.340775	0.153558	-0.10966	-0.0407426	0.212674	-0.110812	0.112057	0.367619	0.188014	-0.0309168	0.0993554	-0.421394	-0.0882409
ADAM7	0.0537304	0.107541	-0.0791193	-0.000582401	0.0378676	0.193328	0.0452235	0.0429007	0.213235	0.254046	0.0739025	0.0335976	-0.118779	-0.133398	-0.0120112	0.0762135	-0.0819738	-0.142379	-0.231901	0.0512111	0.0951031	0.157417	0.0469383	-0.332831	0.140079	-0.115048	0.0352572	-0.0406071	-0.152011	-0.153163	-0.156461	0.155451	0.131981	-0.138865	0.10553	0.146966	-0.266679	0.0455554	-0.25688	0.0501197	0.010893	-0.0759027	0.233378	0.123997	0.0417495	0.203356	0.111849	-0.114537	-0.0405322
ADAM8	-0.413021	0.0666126	0.550514	0.425924	-0.120017	0.231571	0.500466	-0.0235411	0.0641619	-0.421865	-0.163468	-0.0912334	0.263622	0.0375959	0.299795	-0.274959	0.153398	-0.239533	-0.188721	-0.147658	-0.35849	-0.213917	-0.0491493	0.463583	0.0443583	0.28726	0.0470211	0.0967367	-0.031167	-0.00950922	-0.0334312	0.0922937	-0.282279	-0.41244	-0.294272	0.193188	-0.120185	0.144468	-0.0773841	0.0327508	-0.449396	-0.448623	0.0738691	0.0337325	-0.303646	0.124418	-0.261117	0.219614	0.013743
ADAM9	0.0426478	0.442395	0.190106	-0.109632	-0.1039	0.134827	0.103351	0.00583591	0.0470211	0.083757	0.293307	0.190326	0.242966	-0.169246	0.0747768	-0.020141	0.0333384	-0.180158	0.154044	0.0188934	0.290433	-0.113794	-0.497481	-0.0524635	0.199852	0.0697539	-0.248838	-0.183454	-0.0997915	-0.101236	0.0519745	-0.311387	-0.182285	0.161331	-0.103625	0.0480358	0.0146504	-0.014551	0.00994706	-0.199433	-0.0996395	-0.328206	-0.0590576	0.0514247	0.314996	0.0170086	0.0541207	-0.190571	-0.0867569
ADAMDEC1	0.0380008	0.238308	-0.0303294	0.0896437	0.15833	-0.0247873	0.0203155	0.401238	-0.178785	-0.0738991	0.2315	0.185441	0.484941	-0.225785	-0.052953	-0.398153	-0.285668	-0.246595	-0.0241256	-0.0347903	-0.308208	-0.0618428	0.12727	-0.199568	-0.0376528	0.147866	-0.546248	0.332326	-0.287366	-0.623324	0.0306355	-0.342779	-0.0736052	-0.12015	0.121739	-0.192525	0.232678	-0.188472	-0.486909	-0.400802	0.0638109	0.156745	0.0917996	0.394714	-0.083321	0.124067	0.0518767	-0.45898	-0.107499
ADAMTS1	1.22413	0.366869	0.368999	-0.318298	-0.271462	-0.308954	-0.385696	0.118404	-0.135132	0.0117514	-0.0825326	-0.096428	0.709018	0.212771	0.244795	0.3311	0.190106	-0.293885	0.485841	0.451576	0.991875	-0.261498	-0.0244159	0.113585	0.417384	1.33765	0.174754	0.157974	0.219723	-0.104174	0.214866	0.166479	0.078953	0.322312	0.268939	-0.244636	0.291647	0.628422	0.267333	0.198709	0.114261	-0.00492785	-0.138799	0.53259	-0.0266639	0.25146	-0.186887	-0.077703	-0.210853
ADAMTS10	-0.127238	-0.353655	0.246704	-0.269315	-0.372644	-0.423352	-0.479553	-0.191638	-0.285026	0.123529	-0.283342	0.320753	-0.07542	-0.326878	-0.137399	0.683543	-0.723691	0.12445	-0.0294605	-0.398395	-0.0327527	-0.121118	0.326454	-0.0168175	0.207861	0.170915	0.0365017	-0.0856394	-0.27806	0.0277055	0.0723226	0.0237316	0.111222	-0.0399174	-0.0830421	0.545685	-0.0664293	0.232278	0.2143	0.136002	0.484555	-0.173738	0.0829489	-0.322618	-0.0630995	0.0697791	-0.202027	0.299161	-0.292849
ADAMTS12	0.238367	0.162924	-0.0345286	0.036347	0.0758117	0.0201065	0.0868014	0.62802	0.100766	0.211119	0.317223	0.222687	-0.0866443	-0.421226	0.157451	0.510794	-0.206197	0.423715	0.0470701	0.0572034	-0.00646453	0.12742	0.259738	-0.177935	0.539763	-0.146991	-0.220585	-0.15995	-0.217305	-0.361088	-0.348047	0.0106703	0.083757	0.0521193	0.435332	0.274739	-0.0139947	-0.364417	0.131123	0.320753	0.590183	-0.242467	0.0539461	0.0365861	0.45914	0.0872947	0.405861	-0.209283	-0.106575
ADAMTS13	0.0463765	-0.127735	0.231357	0.212674	-0.249116	-0.304711	-0.340192	0.301535	-0.0571218	0.337104	-0.202173	0.0783167	-0.394397	-0.313056	-0.0616281	0.313393	-0.579162	0.0817871	-0.290317	-0.0163086	-0.289839	-0.08294	0.247553	-0.220413	0.24026	0.147415	-0.0791741	0.0969267	-0.296284	-0.589813	-0.287649	0.123925	0.187349	0.134666	0.0828577	0.347401	-0.115532	0.00852071	0.123961	-0.0143764	0.187924	-0.0799225	-0.070459	-0.0802538	0.157568	-0.0741017	-0.0247618	0.162439	-0.033096
ADAMTS14	0.154083	-0.00890187	-0.221957	0.273695	-0.074204	-0.09753	-0.0960309	0.145229	0.0373206	0.133314	0.349721	0.370329	0.0669227	0.0456707	0.0225403	-0.0493925	-0.297577	-0.0345286	0.172219	0.105053	-0.161698	0.448042	0.0135104	-0.24872	-0.0549641	-0.353961	-0.0617319	-0.420735	-0.0912334	0.154125	-0.122372	0.473999	0.0148937	0.387948	0.589533	0.0489975	-0.101739	-0.372186	-0.0570948	0.374005	0.0623105	0.291213	-0.12106	0.602582	0.0444748	0.268185	0.0159934	-0.232013	-0.130212
ADAMTS15	0.105732	-0.00639307	0.0933387	0.119261	0.0754494	0.0139694	-0.324087	-0.0968164	0.0680682	-0.0686844	0.0275981	0.0328315	-0.110195	-0.146629	-0.167193	0.25557	-0.0779537	-0.0893652	-0.238263	-0.0151395	-0.121561	0.313393	0.145844	-0.286637	0.246755	-0.280848	-0.0389645	0.0253117	-0.235184	-0.0217814	-0.188335	0.525245	0.491179	-0.141915	0.003291	0.136002	0.0429007	-0.160538	0.115939	-0.164429	0.477361	-0.0823528	-0.0319357	-0.0108587	0.11801	0.0779619	-0.0811464	-0.0494525	-0.0113305
ADAMTS16	-0.162628	-0.0792557	0.216107	0.0488562	-0.222402	0.0909482	-0.499852	-0.315004	-0.429666	0.0126418	0.0220203	0.189554	-0.307065	-0.655062	0.179491	0.135145	-0.467364	0.283894	-0.280517	-0.577954	0.14946	0.156369	0.0439506	0.105324	0.45642	-0.172057	-0.209142	-0.169817	-0.38222	-0.00915582	-0.277745	0.265292	1.07969	-0.368866	0.163108	0.177896	0.214797	0.0366065	0.320014	0.0690019	-0.0712536	-0.187377	-0.24511	-0.194568	-0.0650527	0.0491622	0.0739025	0.117488	-0.0290785
ADAMTS17	-0.0543067	-0.232971	-0.304846	0.192458	0.222939	0.167119	0.150323	0.350658	0.126243	0.122044	0.360549	0.13219	-0.104836	0.151624	-0.0635832	-0.0244159	0.0810042	0.252453	-0.0912112	0.442879	0.218916	0.387777	0.296203	-0.279018	-0.0410097	-0.144658	-0.194046	0.0291397	0.175935	0.114047	-0.0415278	0.109408	-0.11344	-0.0218034	-0.078792	-0.0857795	-0.230105	-0.158371	-0.0798907	0.167617	-0.115504	0.077841	0.214084	0.0961063	0.256635	-0.151179	0.260682	0.226615	0.127194
ADAMTS18	0.169522	0.155617	0.142323	0.140725	0.178443	0.0801118	-0.0988678	0.252831	0.379228	0.0264083	0.290515	0.470813	-0.0652313	-0.322618	-0.115562	0.144394	-0.0953776	0.155736	-0.0538029	0.0369369	0.166733	0.103263	-0.0794633	-0.182849	-0.169362	-0.23742	-0.360863	-0.114567	-0.183844	-0.117619	-0.019914	0.278122	0.225636	0.0467097	-0.0256152	-0.0206496	-0.227821	-0.0564835	0.059004	0.0921553	0.203514	-0.0173243	-0.145545	-0.112874	0.154017	0.0438082	0.199668	-0.133666	0.00674452
ADAMTS19	-0.0432271	-0.0447574	-0.143358	-0.0842039	0.0501525	0.0976243	0.0393252	-0.0563001	-0.106505	-0.0393096	0.134594	0.115255	0.00507396	-0.13872	-0.0931181	0.0912588	-0.0249341	0.00369327	-0.210234	-0.164959	-0.0810618	-0.0421926	0.0262028	0.0755644	0.199761	0.24526	0.0328816	0.0231893	-0.0437477	-0.122129	-0.0644611	-0.0456782	0.117056	-0.144617	-0.092729	0.0727544	-0.0241256	0.0860262	-0.0653076	0.0521721	0.164186	-0.00356365	0.0823791	-0.164577	-0.135989	-0.151146	0.160359	0.306639	0.028248
ADAMTS2	0.0665188	-0.0201621	0.250603	-0.0591362	-0.0290263	-0.055933	-0.0372387	0.0854584	0.29464	0.0174987	0.0780109	0.130929	-0.230839	-0.315468	-0.199956	0.138946	0.00952736	-0.00895142	-0.0043283	-0.202561	-0.0107854	0.427544	0.282805	-0.0447339	0.232381	-0.121431	-0.00551829	-0.238106	-0.318516	-0.153848	-0.143899	0.119432	0.0114757	-0.0599347	-0.0544446	-0.115532	-0.364795	-0.117584	-0.224952	-0.054679	0.137972	0.0330791	-0.20815	-0.0191299	-0.0994554	-0.0010104	0.183066	-0.218326	-0.0148647
ADAMTS20	0.119745	-0.136836	0.290214	0.123893	0.146225	0.223213	0.161283	0.059509	0.0858385	0.264224	0.0842794	0.0210243	0.326655	0.0215489	-0.155522	-0.0644845	-0.0332096	-0.0221128	0.205007	0.333656	0.232729	0.230444	0.242727	0.0683154	-0.102522	0.0793757	-0.115562	0.168701	-0.0362939	-0.0820307	-0.190033	-0.0890954	0.0873279	0.0444999	0.0325848	0.204261	-0.286287	-0.0758157	0.00817987	0.0131753	-0.052571	-0.0444495	-0.141076	0.0553157	0.0581769	-0.0231902	0.106544	-0.051123	-0.0461856
ADAMTS3	0.131087	-0.120618	0.127194	0.213976	-0.0894234	-0.0306976	-0.0469269	0.101005	-0.0750814	-0.129546	-0.206884	0.237458	0.0497327	-0.276017	-0.0215054	-0.0191509	-0.144815	0.0268355	-0.434408	-0.153119	0.0362969	-0.149151	0.29555	0.0178357	0.171214	-0.145444	0.0168622	-0.107727	-0.151279	-0.0200925	-0.0365829	-0.253215	-0.0894846	0.1647	0.150447	-0.0131253	0.0693147	0.0518466	0.106312	-0.0438037	0.0471828	-0.232158	-0.0307427	0.0502824	-0.178617	-0.0199415	0.380897	0.172052	0.187108
ADAMTS4	-0.318796	0.073656	-0.0441672	-0.0380993	0.288288	-0.33482	0.223774	0.239094	0.305956	0.0146951	0.0653237	0.0526963	-0.0811174	-0.310541	-0.187738	0.174238	-0.162026	-0.0072607	0.327937	-0.353872	-0.418581	-0.21548	-0.048829	-0.0942903	-0.194225	-0.156889	-0.253215	-0.43683	-0.293297	0.0341204	-0.45898	0.283698	-0.242467	0.0967006	0.0621094	0.247894	-0.378344	-0.745731	-0.0778383	-0.128312	0.0643791	-0.304766	0.0386201	0.123454	-0.0291328	0.0405919	0.408556	-0.270779	0.00992123
ADAMTS5	0.202609	0.62938	0.0993841	-0.000254792	0.246096	0.167044	0.0316726	-0.0373648	-0.0238385	0.275395	-0.329059	-0.0152209	0.377726	-0.132137	0.818186	0.382554	0.352073	0.697266	0.244854	0.264437	0.948678	-0.0429632	-0.138764	0.766375	-0.210904	0.235215	-0.112136	0.205515	0.00154517	-0.54315	0.196193	-0.0304005	-0.0300553	0.75619	-0.111911	0.0777431	0.0724889	0.472403	0.0729299	-0.146522	0.00458203	0.0248861	0.141543	0.445382	-0.0139706	0.372602	-0.264368	-0.406095	-0.478827
ADAMTS6	-0.0792869	0.0245825	-0.2267	-0.00743915	0.197491	0.258932	0.174324	0.208896	0.156092	0.0882524	0.258665	0.0325018	0.108098	-0.0217814	-0.040656	0.0402106	-0.00196882	-0.0911065	0.102595	0.113247	0.184224	0.127232	-0.167316	-0.298659	0.0487463	-0.233818	-0.168965	-0.0415278	-0.020816	0.0946724	0.000492043	0.0617571	0.358113	-0.110131	-0.0124341	-0.0819159	-0.0404248	-0.21147	-0.0944387	0.000437085	0.0318573	-0.0592686	0.211176	0.233661	0.0126204	-0.187664	0.348159	0.00590909	0.188703
ADAMTS7	-0.163551	-0.0915729	-0.111145	-0.129025	-0.251684	-0.145338	-0.276966	-0.00437607	0.0587645	0.0340323	-0.247321	0.297229	-0.130475	-0.233085	-0.0293663	0.333284	-0.315839	0.00869427	-0.218894	-0.233085	-0.111538	-0.137575	0.778292	-0.011846	0.0841054	-0.0443953	-0.220279	-0.298599	-0.234806	-0.102793	-0.196678	0.240574	0.118615	-0.03168	0.277993	0.33119	-0.0933754	0.0401558	0.102799	0.221082	0.400172	-0.0887397	-0.0202572	-0.0547922	0.0914316	0.0549092	-0.0403512	0.167345	-0.108084
ADAMTS8	-0.173349	-0.0239386	-0.132448	-0.154787	0.168732	0.0467097	-0.337795	0.165269	-0.165639	0.00728346	-0.211849	0.181667	-0.0439487	-0.264106	0.00472881	0.293307	-0.184305	-0.0134821	-0.0725011	-0.246256	-0.177793	-0.0204392	0.295747	-0.134002	-0.0178336	-0.0105506	-0.0657113	-0.334731	-0.0778673	-0.315181	-0.298131	0.268269	-0.0234903	-0.0774902	0.337885	0.295837	-0.25481	-0.121767	-0.0118939	0.0488309	0.222547	-0.104235	-0.0260065	-0.0190321	0.15141	0.0669227	-0.0278898	0.0957902	0.0133319
ADAMTS9	-0.0535215	-0.166381	0.0953647	0.122668	0.0672484	-0.063129	0.122009	-0.00685006	0.142705	0.296881	0.260217	0.141157	-0.0494224	-0.180245	0.0584624	0.00404796	-0.161603	0.172693	-0.0152907	0.212817	-0.0714459	0.304952	-0.0957049	-0.0933754	0.019396	-0.210558	-0.0651974	-0.107311	-0.186461	-0.141656	-0.190368	0.372953	0.0414167	0.133917	0.08736	0.0216692	-0.153815	-0.277807	-0.0944888	0.0995875	0.155527	-0.0557679	-0.164762	-0.209373	0.28909	-0.0152696	0.12742	-0.10778	-0.0636765
ADAMTS9-AS1	0.268185	-0.0573428	-0.518826	-0.0136644	0.0724889	0.205958	0.17436	0.280029	0.0777431	-0.0514407	0.0371662	0.584052	-0.164959	-0.119467	0.00259478	-0.211129	-0.0960309	0.114232	-0.161993	0.063287	-0.0501796	0.0495733	-0.000464925	-0.238212	0.292597	0.0232346	-0.279641	0.0878919	-0.0758401	-0.0686083	-0.170656	0.206421	-0.0860661	-0.088849	0.24415	0.0741662	0.00810491	-0.269245	-0.0507011	0.147948	0.189123	-0.0811464	0.243596	0.0891983	0.189329	-0.202376	0.014718	-0.111911	-0.221776
ADAMTS9-AS2	0.0804119	0.166307	-0.0229394	0.0293514	0.090495	-0.0758401	-0.0243434	0.187879	0.120232	0.0489641	0.233866	0.293026	-0.00213754	-0.0843764	-0.00176633	0.0771743	-0.0266402	0.040965	-0.172509	0.0173488	0.115324	0.0626615	0.0248648	-0.142555	-0.0570381	-0.151762	-0.0238667	-0.0706249	-0.00769836	-0.0528718	-0.127911	0.0902164	0.109973	0.198571	-0.017552	0.0903085	-0.0753578	0.0112016	-0.0503905	0.0213946	0.257512	-0.130052	0.0326352	-0.304546	0.286824	0.120971	0.0187709	-0.00231673	-0.0572584
ADAMTSL1	-0.163468	-0.0315405	-0.108287	0.088777	0.0462951	-0.0980517	-0.0584584	-0.00710444	0.134872	-0.0317234	0.0423168	0.0861529	-0.0281936	-0.0941123	-0.0922923	0.209232	-0.143899	0.122778	-0.0472927	-0.019466	-0.0150928	-0.0125087	0.142096	-0.0698912	0.120204	0.0304217	-0.0167041	-0.11402	-0.199433	-0.0535461	-0.0699745	0.238189	0.000408511	0.0390571	0.110757	0.194408	-0.0383724	-0.0694811	-0.0729888	0.0412536	0.189936	-0.149469	-0.120808	-0.146181	0.0109639	0.153046	-0.00139826	0.0809398	-0.00382058
ADAMTSL2	-0.239922	-0.776873	0.106544	-0.516529	-0.187664	-0.215252	-0.737001	-0.126566	-0.143323	-0.0613674	-0.292361	0.0728127	-0.713496	0.0206827	0.280236	0.0252547	-0.529323	-0.308208	-0.353961	-0.673186	-0.0628227	-0.293214	0.374333	-0.458625	0.185303	0.214198	-0.29121	0.0479187	0.114531	-0.155615	-0.553576	-0.0124132	0.148154	-0.00501103	0.348883	0.254451	-0.242191	0.296728	-0.0301089	0.152099	0.467487	-0.367115	-0.280455	-0.379221	-0.175864	-0.0724177	0.0799352	0.0436171	-0.213539
ADAMTSL3	0.0308378	-0.0605506	-0.0180023	0.123721	-0.0757572	-0.107751	-0.229589	-0.0416826	0.0477562	-0.0869926	0.0465466	0.0295148	-0.152276	-0.0069831	-0.0523833	0.184883	-0.0497536	0.0916794	-0.0235125	-0.145444	-0.0888799	0.127599	0.110788	0.0677147	-0.0320392	-0.170059	-0.204309	-0.103151	-0.0940488	0.100005	-0.255048	-0.0328812	0.160038	0.104767	0.127677	0.557102	-0.127058	-0.0284494	-0.0186032	0.125023	0.152519	-0.207827	-0.243113	0.0496512	0.110757	0.0455024	0.122606	0.0624014	-0.0279161
ADAMTSL4	0.0300084	0.0292714	0.0151528	-0.0286908	0.325903	0.276966	0.325903	-0.055212	0.279021	0.118946	0.0171643	0.361185	0.174238	-0.365943	-0.24511	-0.0425584	0.0045526	0.294718	0.063999	0.121081	0.219469	-0.00082807	0.0314389	-0.0673891	-0.114739	-0.327141	-0.208104	-0.191113	-0.572955	-0.329732	-0.159729	-0.163947	-0.0674103	-0.428529	0.0473542	-0.0564073	-0.27385	-0.410948	-0.440189	-0.205756	-0.0669826	-0.482373	-0.00910421	0.141201	0.192548	-0.00692601	0.111927	-0.288434	-0.312636
ADAMTSL5	-0.157411	-0.0497536	-0.164996	-0.351158	-0.29412	-0.235295	-0.362966	-0.0926738	-0.352296	0.0408004	-0.453836	0.48123	-0.380754	0.0130638	-0.225353	0.4432	-0.51599	-0.024219	-0.372782	-0.304546	-0.0621141	-0.0457058	0.484314	0.0060155	0.499451	0.0379746	-0.292589	0.121283	-0.283342	-0.229683	-0.529629	0.0580897	0.614884	0.082571	0.234963	0.534867	0.213176	-0.051202	0.187713	0.206031	0.626113	-0.0918444	-0.507159	0.0660892	0.0217486	-0.283698	0.367	0.261681	0.0696877
ADAP1	-0.343432	-0.363306	0.234736	0.0318869	-0.134574	-0.286357	-0.356973	-0.160806	0.0316726	-0.0771215	-0.308883	-0.0331828	-0.0707003	-0.566636	0.275879	0.298397	-0.347746	-0.0517544	-0.119171	-0.345296	-0.0401155	-0.203824	-0.0891516	0.228071	-0.00811054	0.0788621	-0.316394	-0.40343	-0.433227	-0.35883	-0.133666	0.141856	-0.0628227	-0.0452043	-0.331446	-0.014472	-0.469184	-0.0542644	-0.590709	-0.0246546	0.0605722	-0.352533	-0.352533	-0.276231	-0.011573	0.222992	-0.255402	-0.304469	-0.532114
ADAP2	-0.160691	0.020579	0.32215	-0.31721	-0.110732	-0.257737	-0.421061	-0.366639	-0.153848	-0.219733	-0.244042	-0.307065	-0.00651941	-0.311387	-0.188587	-0.413637	0.289907	-0.325123	0.00182531	-0.626167	-0.639961	-0.472041	-0.132238	0.209041	-0.864741	0.0596972	-0.0660923	-0.773823	-0.268485	-0.283425	0.223435	-0.252866	-0.385696	0.209917	-0.358936	-0.512183	-0.119047	0.013688	-0.526278	-0.178069	-0.426305	-0.081889	-0.391132	-0.0171636	0.0646699	0.173458	0.463185	0.462796	0.428254
ADAR	-0.228726	0.174124	0.112302	0.168564	0.108156	0.0352316	0.130488	-0.187738	-0.0258005	-0.813608	-0.0996148	-0.225477	-0.0112108	0.0538582	-0.398285	-0.445409	0.00705309	-0.255271	-0.369835	-0.326599	-0.459826	-0.405815	-0.0228282	-0.0775148	-0.274262	-0.0608063	-0.212087	0.0169369	-0.143358	-0.115925	-0.00960234	-0.179994	-0.630875	-0.182927	-0.139141	-0.318697	-0.292455	-0.176687	-0.866691	0.502274	-0.504837	0.174791	0.015919	-0.0583294	0.018531	0.0248352	0.611775	0.561362	0.475903
ADARB1	-0.120017	-0.109321	0.046636	-0.00598705	0.162789	-0.0696448	-0.0808282	0.267994	0.102948	-0.0343574	0.25426	-0.027987	-0.0347903	-0.0256866	0.183333	-0.0760664	-0.198232	-0.000653712	-0.114059	-0.101876	-0.0918717	-0.00218343	0.158097	-0.0956152	0.11456	0.0846954	-0.0593991	0.0374222	-0.0342566	-0.133838	-0.108016	-0.0510955	-0.0977532	0.0953244	0.278956	0.124335	0.093931	0.114297	0.0300367	0.210325	0.0763861	0.0752462	0.129033	0.117601	0.0671076	0.0297011	-0.0372619	-0.0749433	-0.121395
ADARB2	0.125061	0.0427099	0.442533	0.149598	0.151251	0.0165091	-0.0880223	0.442879	0.12867	0.267804	0.114803	0.284656	-0.167861	-0.110755	-0.0545228	0.264224	-0.23046	0.14935	0.235164	-0.310876	-0.0284494	-0.0523833	0.611775	-0.174904	0.24106	0.136734	-0.0670064	-0.0345498	-0.106735	-0.357955	-0.181694	0.308949	0.111416	0.166349	-0.062023	0.124635	-0.0993623	-0.0660923	0.0630436	-0.119663	0.0991408	-0.134261	-0.239201	0.432721	0.361003	-0.0860661	-0.0779537	-0.149511	-0.245781
ADARB2-AS1	0.232968	0.256795	0.142588	0.17163	0.521507	0.459351	0.145077	0.55243	0.368762	0.370637	0.288357	0.794655	0.0437016	-0.152354	0.133541	0.271216	-0.267037	0.235215	0.193567	0.394493	0.4408	0.643192	0.118373	-0.333797	-0.112527	-0.400044	-0.328877	-0.26888	-0.400488	-0.117471	-0.598051	0.462422	0.161114	0.166387	0.36237	-0.058998	-0.401436	-0.191	-0.105104	0.279021	0.166913	-0.081734	-0.239747	-0.0265209	0.697266	0.174489	0.337204	-0.239429	-0.31096
ADAT1	0.307227	0.10839	-0.168762	0.091483	-0.0462094	0.0584065	-0.250632	-0.415101	-0.0710504	-0.485498	-0.0517544	-0.123084	0.502274	0.500262	-0.163127	-0.611035	0.11328	0.0286369	0.146149	-0.190814	-0.336614	0.603882	-0.279086	0.0341989	-0.41719	0.229285	0.0729299	0.138652	0.212517	0.0617864	0.106374	0.269189	-0.221327	0.161154	-0.275869	-0.417362	-0.157972	0.0807169	-0.349793	-0.32218	-0.31721	0.42706	0.250962	0.19774	-0.532114	0.309539	-0.390366	-0.260925	0.0584065
ADAT2	0.237164	-0.111478	-0.437587	-0.0494779	-0.0890954	-0.0510222	0.0379746	0.298076	-0.201715	-0.213732	-0.126727	-0.166257	0.22064	0.312872	-0.381292	-0.24872	0.157171	-0.000848375	0.462982	-0.170302	0.419394	0.0934383	-0.12015	-0.0370797	0.0923918	0.103232	0.346685	0.373283	0.162924	0.267677	0.109471	-0.037585	-0.135902	-0.478827	-0.131987	-0.521783	-0.0223563	0.0388601	0.163909	-0.211524	-0.173617	0.135547	-0.0407689	-0.216385	-0.133206	-0.244537	0.00269812	0.260325	-0.0998409
ADAT3	-0.00163065	0.0244115	-0.083127	0.0203671	0.270957	0.116953	-0.165441	0.170915	0.267061	-0.050201	-0.0753578	0.315244	-0.18404	-0.179535	0.134632	0.22048	-0.11294	0.016987	0.0257372	-0.0148943	-0.0557081	0.126949	0.0620461	-0.294272	0.020816	-0.1731	-0.135423	-0.0620495	-0.0686083	-0.0906878	-0.203636	0.0936352	0.0476241	0.160597	0.261426	-0.0164579	-0.115343	-0.267722	0.0563251	0.182786	0.0657275	-0.0952283	-0.340299	-0.116846	0.344736	0.255257	0.161911	-0.173066	-0.0340839
ADCK1	-0.143824	0.309348	-0.300433	-0.537322	0.150782	-0.401604	-0.213484	0.145883	0.0159468	0.180572	0.0157928	-0.0181297	-0.635519	0.00354039	0.191969	0.675369	-0.057225	0.453305	0.409672	-0.00158582	-0.0569877	-0.0582995	0.319058	-0.182205	0.30513	0.141157	-0.102547	0.0356138	0.0173225	0.183475	0.272151	-0.180197	0.622375	0.208579	-0.140853	0.146292	0.224119	0.697266	0.222115	0.0828806	0.20276	0.0863751	-0.242467	0.250141	0.463583	0.0876252	-0.105255	-0.38222	-0.110783
ADCK2	-0.182285	-0.22317	-0.024807	0.00127146	0.346464	0.0311758	0.206916	0.111894	-0.0109052	-0.145623	0.19661	0.0329639	-0.0968737	0.105324	0.112983	0.0277347	-0.147799	-0.0546508	0.236528	0.349606	0.18573	0.142622	-0.191034	0.0324264	-0.0908305	-0.0387957	-0.0469568	0.0762417	0.0954733	0.119362	0.0954369	-0.00382058	-0.125672	0.00866827	0.0275477	-0.218205	-0.0135663	-0.276159	-0.158968	0.00297972	-0.0293663	-0.025204	-0.224502	-0.222592	0.0457269	-0.00938861	-0.0747365	-0.104475	0.107925
ADCK5	0.39578	-0.184443	0.64892	-0.0887397	0.041834	-0.19939	-0.759581	-0.167765	-0.271387	0.521807	-0.288178	0.0402106	-0.763389	-0.742553	-0.025955	1.07969	-0.355468	-0.120313	-0.211129	-0.0549641	-0.560267	-0.127202	0.0625253	-0.327751	0.243074	0.0629869	-0.176397	-0.555844	-0.195931	0.251277	-0.167977	0.529474	0.05776	-0.347013	-0.0351734	0.600789	0.166182	0.254451	-0.0507854	0.0378103	0.547824	-0.25938	-0.269774	-0.13057	0.385852	-0.196678	-0.311236	-0.264493	-0.327487
ADCY1	0.0562702	0.0211265	0.112886	0.0113498	0.131609	-0.0850534	-0.0340365	0.196652	0.144165	0.0625843	0.0654315	0.269609	-0.164686	-0.172509	0.148916	0.210071	-0.0582391	0.140267	-0.0802287	0.138516	0.0772287	0.0838535	0.345875	-0.0329933	0.407873	-0.160141	-0.140367	-0.0960857	-0.174287	-0.31071	-0.267153	-0.018474	0.156308	-0.188852	0.0925612	0.063287	-0.141953	0.0474413	0.095542	0.167392	0.309348	-0.0452577	-0.205834	-0.0696128	0.245088	-0.113039	0.0495421	-0.0921972	0.0464886
ADCY10	-0.0548335	-0.0277756	0.0482347	-0.0364244	0.0245587	0.0790177	0.0947038	0.00968211	0.0211265	0.0119289	-0.128181	-0.123727	0.06947	0.0427641	0.0592239	-0.00962867	0.173368	0.0505643	-0.051123	0.0103351	-0.0773552	0.311966	0.133851	0.0698091	0.022906	0.230751	-0.0689957	0.143412	0.150238	-0.0487403	-0.04302	-0.0545748	-0.00247692	0.0408499	0.163491	-0.0510955	0.0230437	0.0181594	-0.0970494	-0.0292012	0.171	-0.102886	0.0154855	-0.0802287	0.0767896	0.0587063	-0.0241695	0.0893161	-0.143632
ADCY10P1	0.049873	0.714871	1.07969	0.351766	0.411679	0.914054	0.0822605	0.11443	0.651561	-0.124198	0.0276215	-0.245893	0.216833	0.21446	-0.00925978	-0.181363	0.345002	0.0432123	0.132294	-0.0188818	-0.00361112	0.578307	-0.162769	-0.115562	0.0257613	-0.240725	0.229485	0.0679359	-0.264231	-0.141008	-0.0399445	-0.0350768	-0.0294605	-0.200791	-0.28436	-0.232538	-0.130537	0.848247	-0.037821	0.173694	-0.193831	0.00974712	0.322771	0.159622	-0.124034	-0.186887	-0.34201	-0.352197	-0.306991
ADCY2	0.0394125	0.0115997	-0.24572	0.0105227	0.311275	-0.000199065	0.144537	0.43517	0.286571	0.0148937	0.733038	0.341508	-0.0915182	-0.267037	-0.127911	-0.0179202	-0.130353	0.345963	0.051514	0.0112016	-0.2497	0.272348	0.0283327	-0.0483927	0.0715846	-0.102824	-0.0933993	0.0674501	-0.179083	-0.136836	-0.292361	0.11328	0.0145028	0.20064	-0.0297447	0.0942107	-0.304919	-0.240503	0.0692291	0.436023	0.15429	-0.0993623	-0.16954	-0.105496	0.0881257	-0.0537552	0.167163	-0.0304447	-0.188472
ADCY3	-0.221185	-0.161889	-0.165173	-0.262144	-0.0216694	-0.165142	-0.20698	-0.0896635	-0.307379	-0.14978	-0.146876	-0.0442122	-0.259576	0.0638109	-0.0807294	-0.0594497	-0.521783	0.18044	0.176208	-0.0871814	-0.121008	-0.0238667	-0.10258	0.012384	-0.0592399	-0.119077	-0.222223	-0.457619	0.271216	0.0245035	0.119473	0.16978	-0.167316	-0.203501	-0.0663798	-0.0745868	0.0211265	-0.0050416	-0.195074	0.0617571	0.194559	-0.174362	0.0159934	-0.352628	0.092695	0.0269079	-0.153436	0.0635346	-0.171165
ADCY4	0.22005	0.0131307	0.11726	-0.0573428	0.0151528	-0.184581	-0.403571	0.166232	0.181454	-0.407149	-0.00733497	0.385852	-0.209684	-0.265486	0.204756	0.391343	-0.284061	-0.489375	-0.262818	-0.0888799	-0.247793	-0.0146392	0.262744	-0.0199679	-0.00289166	-0.213151	-0.661704	-0.38286	-0.270985	0.0297285	-0.429078	0.144816	0.0377008	-0.305827	-0.11294	0.0580316	0.0378408	-0.238052	-0.140932	0.178217	0.253562	-0.00387092	0.0259642	-0.321587	0.170671	0.0398275	-0.304632	-0.0940176	-0.238589
ADCY5	-0.127631	0.104992	0.316595	0.275117	0.0955711	-0.0338647	0.119292	0.349721	0.167299	0.37518	0.184316	0.536368	0.279021	-0.0688347	0.129205	0.40713	-0.268174	0.380005	0.102688	0.260471	-0.148977	0.12942	0.119714	-0.229181	-0.00664763	-0.0183604	-0.345595	0.0139694	-0.497788	0.0294655	-0.237128	-0.00345637	0.294932	0.134322	0.686319	0.143001	-0.0646755	-0.371107	0.0708335	0.374798	0.299384	0.0310638	-0.119694	-0.0914325	0.319944	-0.10734	0.158944	-0.145731	-0.0173703
ADCY6	-0.14393	-0.0810024	0.0346078	0.127827	0.243905	0.0957902	0.0391869	0.539763	0.247497	0.219723	0.429687	0.488251	-0.183292	-0.195111	0.0359478	0.131981	-0.272117	0.284112	0.144	0.142096	0.101574	0.477117	0.0370449	-0.271653	0.166307	-0.29209	-0.143421	-0.273593	-0.116639	-0.37411	-0.75125	0.253304	0.408274	0.149598	0.0277593	0.00447179	-0.450272	0.0451242	-0.116411	0.180012	0.549528	-0.112972	-0.0663506	-0.0983591	0.200912	-0.0226209	0.156875	-0.081734	-0.103269
ADCY7	0.19848	0.147725	0.373744	-0.00374895	-0.120283	0.0625843	0.145994	0.222115	0.200974	-0.0445382	0.285548	-0.112874	0.103917	0.042216	-0.0725245	-0.0558571	0.334919	0.156005	0.22584	0.134789	-0.00876753	-0.0354371	0.0890698	-0.159193	0.0211543	-0.10654	-0.109261	-0.0735516	-0.00941643	0.112856	0.0357222	0.138289	-0.26225	0.255316	0.259375	0.0614371	-0.0136644	-0.219844	-0.0188313	-0.138799	-0.0219238	0.364532	0.0949589	0.304351	0.406988	0.0603846	0.244667	0.1042	0.00528318
ADCY8	-0.215114	-0.20391	-0.301259	-0.311236	-0.118741	-0.0439212	-0.367115	-0.0427657	0.0997321	-0.11576	-0.102153	0.0775007	-0.321491	0.0240445	0.335953	0.296645	-0.385814	-0.0426941	-0.0178336	-0.0324276	0.436169	-0.138438	-0.23764	0.197337	0.298228	0.38538	0.265413	-0.258651	-0.228124	-0.0281936	0.0139367	0.589191	0.271082	-0.102886	0.0234343	-0.0344792	-0.269587	0.148669	0.119029	-0.0722268	0.309282	-0.291142	-0.0575522	0.234841	0.230444	0.0369048	-0.0950888	-0.0775739	0.0402404
ADCY9	-0.0107605	0.0944336	-0.0916965	-0.044965	0.131981	-0.0883216	0.172305	-0.132137	0.191216	-0.185656	0.0517435	-0.0579959	-0.0309168	0.110067	0.38115	0.0675462	0.0447049	0.108861	0.110937	0.0986549	-0.0090312	0.0641904	0.144044	0.311508	-0.0720394	0.297632	0.106722	0.0773866	0.0569011	0.0791969	0.158371	-0.0935564	-0.161807	-0.121831	-0.333797	0.186772	0.215478	0.146797	-0.176824	-0.104531	0.126352	-0.0238945	-0.177027	0.00306021	-0.133635	0.0684327	-0.235988	-0.0267834	-0.0273068
ADCYAP1	-0.0588102	-0.0344792	0.0909226	0.170789	0.0458791	0.0676792	-0.0559107	0.264639	-0.0669826	-0.0870456	-0.0498596	0.334746	0.178828	-0.169577	-0.0885313	0.148916	-0.0297708	0.184707	-0.259071	0.146493	-0.0637319	0.253731	0.082571	0.0675199	-0.0247387	0.153645	-0.105104	-0.0233541	-0.094262	-0.0284494	-0.23747	0.114708	0.181072	-0.167074	0.128887	0.12007	-0.0405585	-0.105104	0.0166539	0.0817536	0.148448	0.0150193	-0.0290263	-0.211805	0.169598	-0.0686614	0.155696	0.129455	-0.00805102
ADCYAP1R1	0.0279903	0.306911	0.212572	-0.0837666	0.151983	0.406127	-0.0115492	0.554115	0.227344	0.605752	0.233661	0.226562	0.0647793	-0.304238	0.122364	0.0199972	-0.0751963	0.292189	0.159468	0.158869	0.40571	0.176609	0.205568	-0.0915729	0.168187	-0.389361	-0.275726	-0.448623	-0.284216	-0.458226	-0.34723	0.0879593	0.197539	0.153645	0.182109	-0.0839911	-0.359274	0.250895	0.105261	0.0912855	0.208843	-0.159468	-0.209048	-0.109894	0.207861	0.444703	0.260217	0.184883	-0.255743
ADD1	0.00458203	-0.0390442	0.0846954	0.285354	0.230223	0.279695	0.0281225	-0.0130504	0.0822605	0.0809729	-0.192435	0.0632552	0.209323	0.195457	0.120479	0.117876	0.0763861	0.123001	0.190106	-0.127949	-0.122571	0.197778	0.00583591	0.19774	0.100075	0.141419	0.0859673	0.116368	0.183517	0.156439	0.109973	0.287551	0.085587	0.149916	0.139677	-0.0852341	0.118442	0.2588	-0.371933	-0.0123893	-0.0293873	0.250494	0.0439721	0.12577	-0.0486279	-0.00796119	-0.327671	-0.342562	-0.329348
ADD2	-0.113588	0.108235	0.1439	0.0210243	0.140334	0.0920249	-0.0212942	0.175731	-0.0324276	0.102059	0.0649239	0.0547663	-0.277102	-0.0890954	0.155774	0.327676	-0.335018	0.523758	-0.132858	-0.01911	-0.0215743	-0.051342	-0.154028	-0.196678	0.274979	-0.422524	-0.234236	-0.34171	-0.264368	0.105621	-0.187203	0.0928538	0.0657795	0.187487	-0.102007	0.166591	-0.0897967	0.192158	0.0832306	0.277797	0.43685	0.0161205	-0.0435107	-0.0360227	0.290835	0.0643791	-0.152837	-0.0361232	-0.0791741
ADD3	0.140533	0.152018	0.0703377	0.294125	0.0495157	0.149968	0.651561	0.114158	0.0382351	0.220174	0.252212	-0.118326	0.511382	0.640017	-0.310632	-0.00173908	0.842737	0.00948062	0.30178	0.313891	0.247841	0.237685	-0.0915729	0.131347	0.249647	0.293026	0.502274	0.608552	0.474687	0.953579	0.362705	0.0670564	0.0610808	0.313989	0.125582	0.028248	0.48018	0.626582	0.507954	-0.182849	-0.162701	0.492036	0.417384	0.340165	0.289169	-0.0858957	-0.283128	-0.139823	-0.161519
ADD3-AS1	0.0281225	0.0735936	0.0775648	0.394601	-0.100328	0.0412269	0.0538582	0.282057	0.0600282	0.028767	0.0115514	0.199156	0.0251879	-0.0412832	0.0447841	0.0248084	-0.0253312	-0.00314552	-0.0192556	-0.0480643	0.101638	-0.1195	0.0476241	-0.0852068	0.0231668	-0.243678	-0.0296614	-0.0374723	-0.0484686	-0.132104	-0.0403041	0.0140433	0.0991044	-0.122063	0.0262488	-0.27114	-0.0982633	0.0890161	-0.0764405	0.0182526	0.0594801	0.0327048	-0.0852907	-0.113761	0.0807799	0.0144758	0.136855	-0.104114	-0.0494779
ADGB	-0.20087	0.110376	-0.21444	0.0350828	-0.154367	-0.116108	0.0447841	-0.0283219	-0.0669262	0.361003	0.0362726	-0.0334818	0.169744	0.132251	0.401477	-0.0277966	-0.0613421	0.0122074	-0.0410322	-0.167193	-0.385696	0.148485	0.324966	0.0485703	0.111813	0.205515	-0.0180023	-0.100783	-0.0781788	-0.214658	-0.100223	0.0845078	0.261055	0.17441	0.0823182	0.150238	-0.259697	0.261126	-0.150778	-0.00183128	-0.0419194	0.0580316	-0.159837	-0.302835	0.0210243	-0.240098	-0.0763896	-0.0561138	-0.215893
ADGRA1	-0.226498	0.439879	-0.128344	-0.165212	-0.242512	0.243186	0.42793	0.53606	0.28909	0.185952	0.017569	0.439511	0.0687819	-0.145305	0.401891	0.0573783	-0.256088	0.33635	0.0384232	-0.347132	0.259	0.088777	0.269548	-0.266387	0.0536218	-0.117471	-0.442415	-0.433942	-0.270543	-0.381704	-0.443047	0.473127	0.384368	-0.0341708	-0.0325782	-0.0400011	-0.175541	-0.436127	0.432924	0.422853	0.284238	-0.389965	0.0141146	0.554115	0.289435	0.244542	-0.0236439	-0.247999	-0.158932
ADGRA2	-0.171669	-0.23723	-0.229009	-0.308954	0.0719163	-0.015244	-0.206685	-0.0216224	-0.20796	0.0290321	0.20246	0.151583	0.0990662	-0.00965474	-0.193831	-0.046735	0.0859029	-0.238263	-0.0484686	0.124535	-0.0201154	-0.195494	0.0128904	-0.0185781	0.00127146	-0.173537	-0.0566162	-0.0302127	-0.0223563	-0.180585	0.250141	0.237222	0.122119	-0.0673104	-0.0230598	-0.0972915	0.155202	0.132722	0.345484	0.111783	0.00167882	0.177114	-0.0180521	0.0780109	0.225379	0.0668314	-0.167355	-0.324887	-0.283837
ADGRA3	0.203564	0.10665	0.0614066	-0.0561425	0.029405	0.0148654	-0.0394747	-0.00738911	0.179068	-0.140718	0.165176	0.0387964	0.0662371	0.246808	0.0441787	-0.0497536	-0.0806921	0.0852412	0.120543	-0.0659534	0.0250428	0.0155373	0.0793757	0.0859673	0.0827534	-0.108622	0.0520895	0.11456	-0.0111431	0.00487589	0.177931	0.114462	-0.0202349	-0.0375586	0.0232096	-0.219883	0.0612347	-0.0198465	0.176044	0.106965	-0.0577852	0.0880162	0.24385	0.401358	0.0788927	0.163003	0.022066	-0.119853	-0.031167
ADGRB1	-0.125505	-0.057225	0.400684	-0.127366	-0.248207	-0.155453	-0.402732	0.145158	-0.0556124	0.16178	-0.172743	0.401238	-0.618177	-0.56226	0.705177	0.281484	-0.159536	-0.0985594	-0.0192305	-0.0549331	-0.0895742	0.239451	0.194708	-0.235028	0.447644	0.1203	-0.448463	-0.350097	-0.489862	-0.276814	-0.219935	0.884589	0.311508	-0.16122	0.206315	0.0098448	0.00458203	0.114499	0.022207	0.0170353	0.384368	-0.424883	-0.17758	-0.217211	0.413982	0.0814844	-0.144506	0.36237	-0.103806
ADGRB2	0.115004	-0.185781	-0.0952283	0.0308712	0.125447	-0.185815	-0.054036	-0.295441	-0.393571	-0.0924575	0.033018	0.256052	-0.128048	-0.467364	0.0385934	0.303069	-0.0901434	0.0341989	-0.192061	0.0527278	-0.00824362	-0.181608	0.449662	0.0614679	-0.00131429	0.013811	-0.0730433	-0.109109	-0.0339417	0.120717	-0.421552	-0.23747	0.0354501	0.181026	0.088777	0.777154	-0.296703	-0.0893003	0.279408	-0.0273477	0.160945	-0.0122441	-0.295822	-0.0302575	-0.162587	-0.329732	0.00159489	0.294547	0.169176
ADGRB3	0.0292411	0.144	0.171038	0.0432123	-0.146876	0.10799	0.17364	0.0908217	0.0251879	0.120827	0.0139094	-0.113376	0.0163777	-0.0728177	0.105621	0.0371373	0.0432971	0.217722	0.0188934	-0.0555551	0.118873	-0.00291882	0.130003	-0.113321	0.00820765	0.0176945	0.0521721	-0.031395	-0.0418949	-0.0847889	-0.02171	-0.0686083	0.0742331	-0.101086	0.0045526	0.0966693	-0.0354603	-0.021735	-0.144888	-0.139893	-0.0172953	0.0714179	0.268999	-0.0106413	0.269117	-0.000464925	-0.0223563	0.101165	-0.103745
ADGRD1	0.699492	0.127451	0.349836	-0.531509	0.872369	0.570817	-0.196465	0.66104	0.160359	-0.273912	-0.00977601	-0.205561	0.814558	0.288878	-0.36619	-0.119559	0.258747	0.583214	1.1451	-0.127735	0.341784	-0.144325	0.0895448	1.01872	-0.326963	0.936773	0.0734378	-0.129125	0.216497	-0.267526	0.217882	0.125061	-0.109785	1.08897	0.261496	0.426408	0.70372	0.234963	0.110037	-0.0542891	-0.128152	0.231684	0.17217	0.308949	0.496838	0.794655	-0.677913	-0.414747	-0.416711
ADGRD2	-0.759581	-0.982755	0.0410606	-0.40019	-0.463562	-0.600693	-0.870923	-0.666386	-0.877134	-0.362063	-0.999208	-0.193876	-0.529323	-0.252866	0.485841	0.85595	-0.632673	-0.195074	-0.472712	-0.174633	-0.256019	-0.387235	0.0528151	0.0903675	1.16389	0.214797	0.0100181	-0.0309168	-0.555844	0.186102	-0.174703	0.0219134	0.23212	0.149847	-0.067614	0.24526	0.0137654	0.438331	-0.239922	0.138619	0.0610808	0.0277055	0.199668	-0.0217814	0.101705	-0.205309	-0.0942903	0.0158173	-0.121362
ADGRE1	0.674112	0.520662	-0.673186	-0.851918	-0.350396	-0.748043	-0.843156	-0.77506	-0.0437224	0.156912	-0.490354	-0.253151	-0.448795	0.0189178	0.578307	-0.846386	-0.115824	-0.648469	-0.203278	-0.0976907	-0.294641	-0.816762	-0.150844	0.270417	-0.0979249	0.115073	-0.373548	-0.126959	0.129819	0.0514247	0.551712	-0.841214	-0.48074	1.09339	-0.896187	0.421959	0.152755	0.121739	-0.0781788	1.09672	-1.00297	0.336756	-0.246771	-0.579162	0.00567272	0.0827892	0.380742	-0.0440017	0.432544
ADGRE2	0.376035	0.391491	-0.506968	-0.755651	0.14338	0.70224	0.402167	-0.162138	0.250141	-0.0147955	-0.336914	0.00807773	0.900553	-0.611589	0.866765	-0.104672	0.197442	-0.449837	-0.796077	0.122463	0.17609	-0.584245	-0.286637	-0.380222	-0.20092	-0.191199	-0.115285	-0.0241916	-0.494491	0.182875	-0.0567458	0.646688	-0.271856	0.252771	-0.909088	0.41597	-0.572114	0.179795	-0.163252	0.246339	-0.205756	0.429185	-0.584699	0.347401	-0.291747	0.385852	-0.176113	-0.0417639	-0.243236
ADGRE3	-0.231727	0.747815	0.643896	1.44101	0.744446	0.31859	0.0410363	0.24378	0.667929	-0.653264	-0.0788773	0.233661	0.819407	-0.162379	0.909349	0.00937978	0.848247	-0.258846	-0.592613	0.229237	0.0583751	0.0516636	0.610501	0.244542	0.357	1.42307	-0.225112	0.595459	-0.282596	0.275695	-0.189829	0.287617	-0.5345	-0.00977601	-0.444708	0.45002	0.225976	0.502482	0.0507703	0.499236	-0.198691	0.64892	0.273909	0.186772	0.0608172	0.587482	-0.553287	-0.0459035	-0.853812
ADGRE5	0.148448	0.428057	0.265159	0.859895	0.646688	0.410982	0.473344	-0.480525	0.529474	-0.891139	0.0451242	0.0694374	-0.106788	0.123529	0.248898	-0.359924	0.225067	-0.113376	0.276778	0.0132567	-0.074898	-0.105294	0.00182531	0.541474	-0.222697	0.0522909	-0.0432271	0.12942	0.230179	-0.0108808	0.246339	-0.143128	-0.600693	-0.586516	-0.580003	-0.0561138	-0.133965	0.266557	-0.375107	0.942693	-0.573759	0.463745	0.545967	0.397327	-0.178867	0.337995	-0.848245	-1.19167	-0.655062
ADGRF1	-0.0598259	-0.0883216	0.0949838	0.130798	0.125308	-0.0158791	-0.0111946	0.0265123	0.0583496	-0.00760918	0.00430593	0.140993	-0.0674737	-0.076197	-0.0053818	0.128014	-0.0847889	0.285421	-0.183256	-0.0261575	-0.023258	0.107395	0.056551	0.0217486	0.120971	-0.026498	-0.0653697	0.00654602	-0.0910216	-0.0899635	-0.0959973	0.00277709	0.292042	-0.0978328	-0.0664585	0.104448	-0.0252562	-0.0582995	0.0368805	0.0388382	0.0980461	0.0249133	-0.174251	-0.199071	0.0707653	0.246973	0.00682749	-0.0727046	-0.0349526
ADGRF2	0.0533587	0.0913752	-0.170932	0.341965	0.302647	0.681402	-0.0183604	0.151746	0.0269636	-0.0388689	0.12141	0.0933028	0.210793	0.0899065	0.0685001	0.150782	0.133205	-0.188971	-0.206884	0.117977	0.0558856	0.657188	0.0472938	-0.345891	-0.137824	-0.528686	-0.153995	-0.304919	-0.0820559	-0.0772338	-0.227355	-0.0253528	-0.0641799	0.225441	0.439378	-0.264558	-0.0651671	-0.384992	-0.177793	0.047732	0.17095	0.23381	0.0592501	0.300066	0.082689	-0.185135	-0.025029	0.540383	-0.126792
ADGRF3	0.124595	-0.202336	0.412575	0.152149	0.157124	0.134872	-0.0494779	0.0981695	0.179166	0.190876	0.0896437	0.194742	0.124535	-0.132763	0.273159	0.112125	0.140907	-0.0185781	0.34413	0.0386201	-0.0999328	0.0126657	-0.103269	-0.180656	0.119261	-0.1307	0.00254472	-0.311811	-0.0916638	0.00200219	-0.196138	0.0694374	-0.08786	0.0161989	0.200974	0.0290029	-0.2246	-0.25626	-0.279582	-0.040255	0.118873	0.0192281	0.0951714	-0.10654	0.0161779	0.0329639	0.200974	-0.194046	-0.0132924
ADGRF4	-0.0373885	0.225494	0.132722	-0.232391	0.158741	0.156664	-0.0240086	-0.0551621	0.188502	0.0141146	-0.0431988	0.0394364	-0.0390442	-0.137399	0.084735	-0.00053052	0.0484181	-0.0591599	-0.0483245	-0.173617	0.0424657	0.00541282	0.0272185	-0.391003	-0.154479	-0.105171	-0.0713354	0.0323967	-0.256759	-0.0582391	-0.195578	-0.171829	0.0893715	-0.139501	0.0987143	0.0337325	-0.191488	-0.135753	-0.131346	0.00628315	0.0254285	-0.0542342	-0.330413	-0.293297	-0.0619499	-0.218614	0.290365	-0.0288624	-0.0520915
ADGRF5	0.0722886	-0.211805	0.0554312	0.167951	0.0725228	0.12051	-0.139575	0.285704	-0.100543	0.0778665	0.299647	0.336545	0.0257921	-0.0720678	-0.386351	0.0854277	-0.0645149	0.114462	-0.0129806	0.201694	0.0360895	0.0688053	-0.0266402	0.0220972	0.0726413	-0.0621889	0.0187461	-0.108249	-0.118226	-0.042172	-0.0921001	0.186375	0.28094	0.0366875	0.239037	0.0299367	-0.111354	-0.177218	-0.0248633	0.0908217	0.0895734	-0.044965	-0.0722506	0.0490756	0.069261	0.18659	0.243186	-0.0384756	-0.123837
ADGRG1	1.23521	0.0794035	-0.1389	-0.0913211	-0.564231	-0.0280721	-0.341929	0.0186915	-0.70069	-0.127142	0.582016	0.0217741	0.31781	0.0890698	0.499652	-0.0476041	0.158698	0.273848	0.550847	-0.0345286	0.379228	-0.278833	0.187713	-0.377645	-0.0491493	0.823332	0.30342	-0.264106	-0.111538	0.0913223	0.210071	-0.00121785	-0.0545228	-0.0399726	0.607324	0.293829	-0.0255524	-0.146302	-0.134447	-0.0159075	0.208255	0.323328	-0.776873	0.19323	-0.249603	0.17609	-0.44591	-0.61035	-0.354855
ADGRG2	-0.0634752	0.200872	0.381815	0.131609	-0.130668	0.586416	-0.0531958	0.625211	0.00470538	-0.100452	-0.561585	0.463382	0.255922	-0.438984	-0.0400011	0.23441	-0.633361	0.212285	-0.0711129	-0.38088	0.260325	0.0365017	0.0789862	-0.169817	-0.120053	-0.352419	-0.218659	-0.0668395	-0.279769	-0.342666	-0.00818779	0.385505	0.0601441	0.229537	-0.283128	0.35298	-0.506631	-0.0730945	-0.0383724	0.535395	0.0365861	-0.182523	0.0433523	0.509956	0.123383	-0.00530245	0.342351	0.42793	0.0875003
ADGRG3	-0.219678	1.07636	1.13704	0.654492	1.00783	0.206772	0.310409	0.288739	0.684936	-0.574168	-0.515023	0.116587	0.351492	-0.553287	0.965436	-0.309591	-0.0139449	-0.179217	-0.713496	-0.530556	-0.472041	-0.333423	-0.0511504	0.361097	-0.0891258	-0.241887	-0.48649	0.0673361	-0.428202	-0.362508	-0.384455	-0.0897463	-0.821926	-0.580003	-0.82347	-0.0447812	-0.643039	-0.0345286	-0.641652	0.567626	-0.432693	-0.48959	-0.0235671	0.117056	0.231571	-0.00250448	0.46017	0.634389	0.328027
ADGRG4	-0.0752841	-0.0493167	0.131462	0.100809	0.143965	0.377823	-0.154367	0.215157	-0.301816	0.115224	0.592971	0.221439	0.195906	-0.000727511	-0.0764405	0.0725228	-0.251626	0.00523618	-0.118841	0.105132	-0.0372132	0.11859	-0.0959674	-0.162305	0.230925	-0.0206952	-0.0466792	-0.359924	-0.00900963	-0.115637	-0.0609161	0.20421	0.544605	0.165965	-0.0490726	0.0612347	0.106114	-0.0618108	-0.134002	0.0932065	0.243359	0.025606	0.0116237	0.380742	0.321405	0.0839461	-0.0559586	-0.252405	0.0556146
ADGRG5	0.362705	-0.14597	-0.213249	-0.257342	0.0113065	-0.126692	-0.180585	-0.00262512	0.135263	-0.067209	0.104799	-0.0297193	0.0751845	0.190064	-0.0280461	-0.118255	0.0640251	0.111741	-0.072733	-0.173776	-0.0395065	-0.119412	0.115939	-0.0471506	0.0799352	0.34188	-0.00444289	-0.174287	0.166428	0.172693	-0.0305398	0.022906	0.0133078	0.279695	0.249578	0.185636	-0.0582037	-0.139433	0.194189	0.541178	0.1605	0.138466	-0.0289811	0.0161989	0.0638896	-0.143705	-0.0704305	-0.153276	-0.142345
ADGRG6	0.151172	-0.0899045	0.264842	0.129567	-0.080108	-0.112234	-0.00720913	-0.0319357	0.153674	0.131836	0.282514	0.0272449	0.0659941	0.00615475	0.0504565	0.262212	-0.274187	-0.0363158	0.1351	-0.0706249	-0.136537	0.050596	0.128887	0.100875	-0.0736052	-0.197604	0.00324234	0.305956	0.0818178	-0.130828	-0.0617029	0.0449855	0.338264	-0.0069831	-0.0404488	0.285548	-0.0528185	0.0301568	-0.125808	-0.146181	0.0881899	-0.160806	-0.0477896	0.061959	-0.141539	-0.0730686	0.0366363	-0.155172	0.0109382
ADGRG7	0.0449855	0.152755	0.0652937	-0.0469056	-0.17218	0.322227	-0.131088	-0.0677571	0.590183	0.173814	-0.120084	-0.172817	0.134494	-0.0235671	0.0952971	-0.0697294	-0.0218034	-0.276231	-0.0237456	0.168701	-0.0891258	0.0298126	0.274588	-0.135753	0.404867	-0.090357	0.0356937	0.029405	-0.00535541	-0.0838222	-0.134168	0.0416516	0.209616	0.155122	0.199505	0.113515	0.0799352	-0.0591481	0.0244115	-0.0367	0.255153	-0.141656	-0.126327	-0.011647	0.317971	0.011979	0.0417769	0.198757	-0.0483927
ADGRL1	0.235012	0.0319718	-0.00466563	0.16747	0.569685	0.332156	0.564132	0.31548	0.0939614	0.0287378	0.148189	-0.00471867	0.262744	0.181326	-0.118556	-0.151554	0.143074	0.0623422	0.429687	0.278607	-0.0847022	0.309539	0.0448782	-0.0683094	-0.079004	-0.133635	0.211961	0.0758981	0.216729	0.105053	0.0609062	0.304864	-0.26462	0.0104165	0.15585	0.0180578	0.0580611	0.505589	-0.0618881	0.0708593	-0.0481581	0.557102	0.121013	0.352467	-0.0959009	0.161375	0.00145876	0.0530772	0.111159
ADGRL2	0.0829159	0.046127	0.17582	-0.0150233	-0.0140616	-0.0525216	0.0538338	0.0744932	0.003291	0.00765764	-0.0425337	0.125023	-0.0221128	0.0709552	0.0501197	0.00559507	0.0871928	0.13123	0.093931	-0.214173	0.0165793	0.0602696	0.17364	-0.0268512	-0.0890639	-0.206147	0.0616352	-0.0660035	0.00625835	-0.222402	0.00262238	0.201984	0.00399589	0.0457727	0.104263	0.0507989	0.0622282	0.0182526	0.162854	-0.116231	-0.00478876	-0.0601225	-0.0842039	-0.0285922	-0.0527642	-0.117079	-0.00805102	-0.126666	-0.0314632
ADGRL3	0.0965573	-0.16954	-0.048829	0.148448	-0.0673378	0.0098448	-0.0619946	0.0999195	0.0972138	0.127313	-0.0043283	0.284112	-0.11899	-0.0113305	-0.135423	0.121141	-0.00563461	-0.0557081	0.08949	-0.164245	-0.0135386	-0.005153	0.0111229	-0.183928	0.0860853	-0.133206	-0.0486279	-0.194484	-0.279641	-0.0845901	-0.132176	0.0631335	0.0974626	0.0802825	0.00927295	0.0303295	-0.0105717	0.0957216	-0.0104023	0.0961063	0.171291	-0.0940831	0.0809398	-0.0845262	0.0443835	0.0967671	-0.0188818	0.00470538	-0.0754462
ADGRL4	0.00791021	-0.289132	-0.00278742	-0.20391	-0.00884763	-0.00128935	-0.13587	0.0458275	0.0447841	-0.0298407	0.210366	1.00526	0.112916	-0.417771	0.0257372	-0.153771	-0.0786813	-0.0912641	-0.368037	-0.224288	0.139909	0.479727	0.286447	0.147995	0.0462477	-0.30252	-0.355819	-0.128511	-0.159874	0.20064	-0.0512796	-0.0462835	0.205906	-0.20495	0.30178	0.0703631	-0.0679517	0.029299	-0.283508	0.0340891	0.102397	-0.110702	-0.418092	0.209976	-0.0305398	0.0322579	0.104397	0.160814	-0.039647
ADGRV1	-0.0625964	-0.0742872	-0.0309671	-0.0681971	-0.00848257	0.0157483	0.100906	0.018083	0.116982	0.0376765	0.0554833	0.0377544	-0.129694	-0.0849021	-0.0792557	0.117734	-0.0597706	-0.00356365	-0.0594218	0.0144021	0.0359245	0.0668959	0.0655496	-0.0756864	-0.0311936	-0.115637	0.0689743	-0.0471731	-0.105321	0.00247869	-0.0748517	0.12051	0.0618946	0.0752186	0.0536511	0.100875	-0.0585418	0.047653	0.0639467	0.0144527	0.056794	-0.162379	-0.0111946	0.0609062	0.0643489	0.242469	0.162889	0.038979	-0.00609481
ADH1A	-0.187819	0.168151	0.511094	0.116442	-0.0163894	-0.211178	-0.216466	0.0331033	0.131347	-0.0992897	-0.152837	0.814558	-0.516529	-0.357749	-0.160575	0.288573	-0.196058	-0.0252311	0.11443	0.104923	-0.188673	0.331473	0.155973	-0.371933	-0.279582	-0.102185	0.0600598	-0.325606	-0.252738	-0.330413	-0.185292	-0.189009	-0.242784	0.284574	0.191707	0.340898	0.0381851	-0.0816778	-0.305258	-0.210987	0.0696541	0.264772	-0.303337	-0.0041799	-4.93e-05	0.164005	-0.071746	-0.0210982	-0.245002
ADH1B	0.0176177	0.00386588	0.120861	-0.103745	-0.0831814	0.0357844	-0.00705559	0.0596437	0.158644	0.0811292	0.0873279	0.243905	-0.0928648	-0.145999	-0.0302127	0.0778075	-0.220453	0.183735	-0.147828	-0.100393	-0.0137703	-0.170818	0.0711221	-0.0787365	0.0660296	0.00300681	0.0323627	-0.11294	-0.0784379	-0.199433	-0.0240991	0.109471	0.00630886	-0.0659763	-0.08514	0.101864	-0.187162	-0.0679517	-0.0715862	0.0353933	0.0217486	-0.0151681	-0.0524635	-0.148258	0.0232854	0.0671076	0.02378	0.103232	0.062736
ADH1C	-0.0705436	-0.227665	0.24136	-0.0989879	0.329715	-0.0788773	-0.214601	0.0982895	-0.141044	0.0770847	-0.205427	-0.16412	0.143482	-0.0588102	0.180098	0.224558	0.0145798	0.0610808	-0.242512	-0.209733	-0.191	-0.285113	0.211274	0.0204968	0.452296	0.0453113	-0.0751707	-0.0896325	-0.235086	0.043508	-0.00649265	0.39499	0.0325848	-0.175161	-0.0421173	0.233919	-0.118418	0.00195571	0.113844	0.116684	0.121377	-0.149546	0.18095	-0.134447	0.085587	-0.366406	-0.0419194	0.0118568	-0.0698676
ADH4	-0.137786	-0.165173	-0.158287	0.118682	-0.0402804	0.0365017	-0.0236694	0.0148654	0.140577	0.0648596	-0.108678	0.000167998	0.0203671	-0.0249607	0.240872	0.0359245	-0.0877102	-0.134063	-0.0308954	-0.10877	0.107429	0.0106949	0.220546	-0.0392537	-0.00975074	-0.0218519	-0.046848	-0.0314453	-0.00449433	0.107183	-0.0483499	0.0519352	-0.0684197	-0.0630401	0.0590925	-0.0974977	-0.0986094	0.0170875	-0.0989879	-0.0972325	0.0394918	-0.163513	-0.132551	-0.0524091	0.0266259	0.0279582	0.00606785	0.106859	0.0378949
ADH5	0.494417	-0.20654	-0.307065	-0.154225	-0.282011	-0.108866	0.0216989	-0.213585	-0.491958	0.131347	-0.161661	-0.238479	0.103506	0.54839	-0.259697	-0.188171	0.464601	0.0903963	-0.202261	0.250603	0.435332	-0.206795	-0.404302	-0.284061	-0.0887966	0.225172	0.520369	0.57941	0.470595	0.464428	0.58884	-0.457031	0.276629	-0.337697	-0.0954376	-0.10433	0.664329	0.167951	0.471971	-0.348895	-0.280086	0.11801	0.441856	0.0529302	-0.184957	-0.180543	-0.264493	0.0145028	-0.133435
ADH6	0.149225	-0.0992656	0.26203	0.0569535	0.267677	0.0480358	0.034359	0.0223379	0.415492	0.338095	0.180906	0.603882	-0.10075	-0.203459	0.0901129	0.345576	-0.341617	0.229443	-0.114625	-0.141762	0.0448292	-0.101739	0.40571	-0.0595262	-0.283054	-0.427327	-0.0387711	-0.289839	-0.0711445	-0.0479441	-0.25257	-0.0636436	0.0529578	0.121109	0.213976	0.0123129	-0.249922	0.0947977	0.0641094	0.1794	0.394086	-0.114567	-0.192888	0.0112794	-0.0446509	0.00972824	0.198571	-0.170932	-0.174362
ADH7	0.170841	-0.0260298	-0.311236	0.112618	0.0576591	-0.0376301	-0.0429938	-0.00335736	-0.273912	-0.00925978	0.291964	0.404572	-0.0535724	-0.00186718	0.777154	0.390076	0.153046	0.088583	-0.108123	0.255996	0.382308	-0.0531115	0.0227647	-0.384603	-0.113761	-0.300941	0.0414684	0.00815391	-0.236907	0.075992	-0.121294	0.149763	-0.0192556	-0.057738	0.185917	0.335262	-0.0687804	0.41902	-0.19779	-0.151395	0.0217985	0.100535	0.0408235	-0.102122	0.0892854	-0.215893	0.313797	-0.140367	-0.162587
ADHFE1	0.752259	0.20203	0.175647	-0.549897	0.27963	-0.126327	0.0246367	0.24553	0.230592	0.0967006	0.0595632	0.281204	0.217055	0.200974	0.296881	0.184528	-0.217058	0.726748	0.412098	-0.0966906	-0.150496	0.0361409	-0.14475	0.14576	-0.0722506	0.375704	0.117905	-0.00384704	-0.231392	0.133541	-0.32218	-0.0372132	-0.410278	0.0434056	-0.00234665	-0.42233	-0.0725758	-0.0318836	0.610011	-0.112388	-0.146101	0.294365	-0.439161	0.246465	0.0234343	-0.323019	0.00710337	-0.266805	-0.138932
ADI1	-0.0105929	0.217939	0.156617	-0.071283	0.212071	-0.0631812	0.0923249	-0.234655	-0.094997	0.0681254	-0.0284981	-0.103356	0.471221	-0.12747	0.138211	-0.0422178	0.159468	-0.255926	0.1018	0.113419	0.242309	-0.232971	-0.011086	0.0772948	-0.0288843	-0.136168	0.246405	0.0625561	0.0386937	0.166867	0.259993	-0.165403	-0.392458	0.380094	-0.358612	-0.0692185	0.383198	-0.227303	0.226888	0.00715442	-0.206235	0.0731767	-0.656231	0.263325	-0.0829141	0.144	-0.394274	-0.340687	-0.0255933
ADIG	-0.063129	0.00210459	0.0453653	-0.194046	0.0752462	0.0859329	0.0925947	0.563445	0.0633714	0.0104401	0.326454	0.312224	0.208471	-0.187377	0.0257106	0.141419	-0.148005	0.143238	0.0570093	-0.0517544	0.221371	0.448239	0.0413937	-0.0965388	0.147607	-0.143421	-0.314005	-0.110544	-0.116018	0.0208494	-0.299495	0.30394	0.0540029	0.0818676	0.203253	-3.74e-06	-0.0540951	-0.376505	-0.102522	0.179609	0.21096	-0.0181984	-0.198859	0.285704	0.294365	0.227116	0.248408	0.0976862	-0.167234
ADIPOQ	-0.00549903	0.36855	0.148117	-0.295513	-0.0366311	-0.224704	0.231783	0.201984	0.181531	-0.242135	-0.0167904	0.458936	0.0921224	-0.0494525	-0.228167	0.177604	0.0309491	-0.0545539	-0.18102	0.0378949	0.119432	0.106277	-0.0418949	-0.301518	-0.249641	0.128338	-0.0124586	-0.202937	-0.0929284	-0.303261	-0.0382675	-0.00296491	0.00590909	-0.016341	0.290596	0.106374	-0.461912	-0.00753593	-0.190849	0.026805	-0.0152907	-0.0382215	0.131727	-0.344165	-0.269587	0.655993	0.142361	0.0243098	-0.0456782
ADIPOR1	-0.163291	-0.0847022	0.380005	-0.342868	-0.370241	-0.411886	-0.447023	0.246704	-0.43286	0.967365	-0.0218519	0.178524	0.0396383	-0.144129	0.361867	1.14061	-0.767303	0.957684	-0.334154	0.317892	-0.0731748	-0.129622	0.182875	-0.304991	0.838669	0.540063	-0.386069	0.0025014	-0.827065	0.134872	-0.171586	1.00783	0.507113	0.558919	0.246973	0.156745	0.485448	0.514226	0.498258	0.183333	1.12377	-0.671669	-0.051123	-0.156675	1.1916	0.124775	-0.274638	0.059361	0.129134
ADIPOR2	0.00308914	-0.0933993	-0.220854	-0.0786534	0.0652372	-0.114681	-0.0642905	-0.317362	-0.0416089	-0.663204	-0.0559827	-0.153057	0.405987	0.162398	0.271082	-0.152914	-0.0772691	0.176928	0.0750597	0.129604	-0.363657	-0.319327	-0.187819	0.0512349	-0.447023	0.158944	0.109515	0.020211	0.14166	-0.113376	0.213007	-0.0906333	-0.368288	-0.224661	-0.042172	-0.0961834	0.0345195	0.0381851	0.0149738	-0.0644611	-0.496036	0.579817	-0.132514	0.215109	-0.00637066	0.26597	-0.071283	0.225534	0.135187
ADIRF	-0.249461	-0.254256	-0.156053	0.363248	-0.263834	-0.168888	-0.18078	-0.310876	-0.326109	-0.261675	-0.0463866	0.00195571	-0.648469	-0.290317	-0.08821	0.0200795	-0.707457	-0.330975	-0.09006	-0.3875	-0.0879547	-0.172413	0.84685	-0.00353412	0.247043	0.286571	0.216684	-0.754549	-0.163012	0.0140943	-0.0658697	-0.251356	0.385996	-0.308745	0.290054	0.493674	-0.0195326	-0.142456	0.114871	-0.147099	-0.00267986	0.0295954	-0.210429	-0.416271	0.324416	-0.431082	-0.163754	0.174754	-0.0255097
ADIRF-AS1	0.917294	0.166867	0.0389493	0.149383	0.598423	-0.0230598	0.403212	0.592971	-0.0560357	0.23625	0.199559	1.45295	0.0453653	-0.250632	0.0385022	0.443881	0.0101661	0.597106	0.842737	0.189775	0.439195	0.527094	0.0158173	-0.204864	0.5673	-0.953973	-0.1241	-0.975442	-0.862658	-0.150805	-0.0994798	0.293245	0.240517	0.554405	1.37156	0.494671	-0.416711	-0.172625	-0.0139706	0.262931	0.124678	-0.129656	0.0168359	0.151372	0.674112	0.348374	-0.0120602	0.10011	-0.141302
ADK	-0.218659	-0.172693	-0.219844	-0.0917836	0.241891	0.281337	0.592971	0.325991	0.0880162	0.523504	0.318745	-0.125569	0.113213	-0.0304447	-0.166656	-0.111744	0.284176	0.169744	0.136734	0.0825095	0.0331033	-0.0413439	-0.212289	-0.143192	0.169889	-0.0766619	0.210535	-0.195813	0.1436	0.193328	-0.0361715	0.084385	4.28e-05	-0.0161839	-0.0486073	0.119029	0.0114066	-0.139669	-0.063129	-0.298367	-0.0139449	-0.243047	0.379228	0.610501	0.179883	0.506543	0.00233511	-0.193923	0.242588
ADM	-1.62442	0.608552	0.528584	-0.541846	0.166996	-0.480998	-0.372073	-0.254076	-0.303892	-0.730663	-0.870923	-0.864741	-1.4151	-2.22037	-0.772383	-0.843156	0.216629	-0.344776	-1.2094	-1.38056	-1.39757	-1.25236	-1.20023	-0.105496	-0.476087	-0.990436	-0.911411	-0.589172	-0.43699	-0.386351	-0.475594	-0.494023	-0.748043	-1.94188	-1.87743	-0.740221	-0.901656	-0.677913	-1.28974	0.0707134	-1.26387	-1.45757	-0.46004	-0.599821	-0.473816	-0.19986	0.575612	0.393015	0.716414
ADM2	-0.047205	-0.175381	0.176693	0.369366	0.0518767	0.00458203	-0.286696	0.406809	0.33119	0.211009	-0.172219	0.028796	-0.159077	-0.119889	0.331723	0.625211	-0.536126	0.283621	-0.0100686	-0.0208869	-0.305999	0.605752	0.215257	0.0986238	0.124418	0.0809034	-0.248151	-0.179624	-0.629154	-0.10364	-0.410559	0.723321	0.917294	0.131868	0.237792	0.313483	-0.177793	-0.00793562	0.0741361	0.296342	1.0131	-0.364314	-0.615492	-0.0691248	0.5871	0.123755	0.0435279	0.180269	0.0357222
ADM5	-0.0163665	-0.163982	-0.108866	-0.323606	-0.0914909	-0.174666	-0.567062	0.284238	-0.530839	-0.0996678	-0.117979	0.116684	0.326454	0.346909	0.211419	0.33999	-0.510194	-0.173384	-0.285668	-0.104836	-0.60026	-0.0461606	0.320509	0.116658	0.472199	-0.0897967	-0.00281191	-0.253151	-0.154968	0.0782239	0.0760855	0.0125177	0.223383	-0.271064	0.52094	0.00333803	-0.255337	-0.452849	0.140301	0.18044	-0.150099	-0.0657923	0.142394	0.0640251	0.490345	-0.206434	0.0614371	0.2082	-0.0339166
ADNP	0.206512	0.0340891	-0.187084	0.224408	-0.0597415	0.214866	0.276447	0.0498455	-0.0838589	-0.0507305	0.116017	-0.197931	0.421571	0.486072	0.169964	-0.139433	0.436559	0.116298	0.687045	0.464601	0.486301	0.114402	-0.159077	0.247894	-0.0269799	0.544882	0.301703	0.714871	0.493828	0.591264	0.443006	0.421571	0.212431	0.581662	-0.0464971	0.0760855	0.54237	0.424013	0.402734	-0.086383	-0.164762	0.589533	0.75525	0.726748	0.142281	0.165269	-0.116231	0.0828577	-0.0557973
ADNP2	0.0165517	-0.162026	-0.143668	0.121181	-0.228836	0.0734378	0.105802	-0.168433	-0.158371	-0.356397	-0.228674	-0.3617	0.277643	0.388092	0.169388	-0.209551	0.190372	0.0661421	0.164412	0.120543	0.236582	-0.0325015	-0.120376	0.0756603	-0.180735	0.386232	0.263759	0.209232	0.24415	0.262377	0.213065	0.00682749	0.224661	0.0695922	-0.207735	0.0304031	0.105978	0.485841	-0.00565747	-0.101585	-0.203769	0.33999	0.393706	0.188376	-0.034313	-0.142688	-0.0638996	0.348478	0.36855
ADO	0.191377	0.00392307	-0.143753	-0.0111946	-0.110812	0.200572	0.0212868	0.0483432	-0.502409	-0.156746	-0.0502577	-0.371351	0.199905	0.343671	-0.0614175	-0.323019	0.241542	0.152673	0.300924	0.273569	0.30342	-0.0237945	-0.419425	0.433614	-0.123727	0.135019	0.353637	0.174754	0.41902	0.765253	0.63689	-0.210188	-0.0987297	0.439511	-0.29985	-0.57567	0.437603	0.313051	0.386232	-0.133398	-0.319978	0.303631	0.409546	0.294125	0.236631	-0.08514	-0.20787	0.111486	0.366396
ADORA1	-0.50212	-0.0883555	0.00151848	-0.0685008	-0.120254	-0.198604	-0.34201	-0.0874947	-0.223747	0.154738	0.0519745	0.238981	-0.103533	-0.390126	0.0521721	0.462982	-0.178113	0.0874765	-0.25174	-0.300287	-0.265347	-0.0941123	0.165591	0.0879593	0.424965	-0.249171	-0.0520915	-0.00265447	-0.150423	-0.165874	-0.308883	0.164933	0.0999494	-0.0556327	0.0361932	0.0702719	-0.119824	0.0857756	-0.0318289	0.178655	0.094127	-0.422688	0.0160884	-0.169743	-0.225059	-0.145444	-0.236146	0.0884651	-0.260872
ADORA2A	-0.173898	-0.195615	-0.537998	-0.107377	0.107249	-0.336614	0.0784041	-0.280028	-0.124167	-0.33511	-0.325516	-0.447241	-0.195659	0.14266	-0.431855	-0.332554	0.351492	-0.438826	-0.0796881	-0.586062	-0.241827	-0.260814	-0.103598	0.166681	-0.00361112	-0.303972	0.198101	0.0729654	0.491361	0.22965	0.150323	-0.0657923	-0.202376	-0.714734	-0.135728	-0.458625	-0.0344526	0.26774	-0.238995	-0.267526	-0.360645	0.243596	0.0226415	-0.284815	-0.168888	-0.129354	-0.394975	-0.0183817	0.304864
ADORA2A-AS1	-0.112912	0.123454	-0.0256866	0.0549092	0.370193	0.165858	0.242851	0.119029	0.340362	0.265834	0.637951	0.720052	0.0240787	-0.0971643	0.122084	0.111701	-0.00561292	-0.0260555	-0.197426	0.3972	0.0209223	0.434595	0.491179	-0.13872	0.263967	0.231842	-0.127097	-0.00824362	-0.0913211	-0.122469	-0.172693	0.131194	-0.125773	0.0653984	0.0349797	0.122463	-0.149546	-0.280997	-0.15173	0.0787101	-0.0743721	0.10103	0.0571539	0.00628315	0.0195834	0.293753	-0.0278693	-0.122314	-0.111744
ADORA2B	-0.325695	-0.142345	0.167916	-0.483732	-0.160614	-0.0218519	-0.052064	0.259175	0.15585	0.122258	-0.10993	-0.206235	-0.116319	-0.203323	0.66329	0.275595	-0.172057	-0.115824	0.00190598	-0.624895	-0.334154	-0.0829977	-0.0417639	0.237336	-0.045375	-0.00262512	-0.0770363	0.059361	0.0291657	-0.122925	-0.13057	-0.0699745	0.286507	0.41241	-0.38862	0.150961	-0.222592	-0.479097	0.138172	-0.156461	0.0190332	-0.00511119	-0.164883	-0.311639	0.206816	0.425776	-0.255337	-0.517129	-0.471015
ADORA3	0.131005	-0.0199679	-0.161564	-0.490637	-0.121831	-0.295368	0.0472153	-0.224399	0.241125	0.0114757	0.720897	-0.0188818	0.605752	0.0361168	0.317551	-0.179842	0.206727	0.0788927	-0.000381883	-0.201624	-0.502682	-0.132763	-0.0268985	1.17221	-0.198988	0.280094	-0.27283	0.259622	0.305036	-0.0226209	-0.135026	0.119745	0.105869	0.527961	-0.626792	0.134494	-0.298035	-0.28993	0.663797	0.857172	-0.263487	0.428552	-0.435783	-0.353094	-0.478314	0.363589	0.603478	0.728179	-0.265835
ADPGK	0.126632	0.207655	-0.0835318	-0.200087	-0.0604218	-0.0469568	-0.143574	-0.218794	-0.0992897	-0.186887	0.0795241	-0.313799	0.257571	0.129856	-0.303972	-0.171165	0.0124627	-0.180084	-0.208738	-0.0206202	0.0142565	-0.0807915	-0.277294	-0.0452043	-0.154407	-0.046735	0.0377008	0.0734721	0.0310914	0.0126418	0.101769	0.0795578	-0.253631	0.0460418	-0.292295	-0.235931	-0.0221359	-0.136566	-0.00970381	-0.154122	-0.2438	0.323869	-0.052953	0.277308	-0.117471	0.528879	0.369759	0.374454	0.464214
ADPRH	0.0996646	-0.0206496	0.0695016	-0.224174	0.111961	0.0449583	-0.100929	-0.0502865	-0.151317	-0.119663	-0.206844	0.0560819	-0.0682536	-0.110261	0.178297	0.136047	0.105496	0.130488	0.0492443	0.172519	0.0909226	-0.0752841	-0.202937	-0.0514937	-0.011573	-0.198422	-0.422008	-0.27034	-0.0885313	-0.342467	0.047098	0.110863	0.0726924	0.276301	-0.334435	-0.034313	0.106277	-0.148334	-0.470791	0.428395	-0.0527904	0.0786185	-0.136703	-0.0403041	0.0170875	0.147565	0.300343	0.0934068	0.26268
ADPRHL1	0.106722	0.0310638	0.168151	-0.0899635	0.2315	-0.181151	-0.219784	0.226837	0.0349797	0.0135104	-0.125032	0.0155373	-0.0992035	-0.294641	0.136391	0.0554312	-0.319147	0.107249	-0.0506191	-0.103097	-0.00425305	0.307922	0.18073	0.0135104	0.292042	0.0475958	-0.125441	-0.203724	-0.288928	-0.0321957	-0.456211	0.165637	0.0418088	-0.00413011	-0.0793438	0.48062	-0.16943	-0.0546256	0.0795578	0.0168622	0.537329	-0.300074	-0.231106	-0.209142	0.241237	0.0718294	-0.0206952	-0.163386	-0.080108
ADPRHL2	-0.53699	-0.240503	-0.562701	-0.123223	-0.0355871	-0.163425	-0.321934	-0.517961	-0.24511	-0.592613	-0.843156	-0.344222	-0.237032	0.132156	-0.0249341	-0.461212	0.0397493	-0.522652	-0.284061	-0.246983	-0.0395903	-0.105802	-0.288238	0.333959	-0.151243	0.0526431	0.0676461	0.166996	0.113585	-0.09818	0.249329	-0.116743	-0.249864	-0.217749	-0.372507	-0.166998	-0.1035	-0.185496	-0.280455	-0.209501	-0.763389	-0.0277538	-0.110231	-0.142629	-0.343138	-0.413303	0.581244	0.665506	0.649886
ADPRM	-0.0493167	-0.743541	-0.357281	-0.451399	-0.249233	-0.324797	-0.136272	-0.374998	-0.297654	0.347217	-0.199526	-0.614413	0.024217	0.310409	-0.526278	-0.238758	0.12727	-0.512183	-0.327309	0.127023	0.332237	-0.456016	-0.172013	-0.386979	-0.506124	-0.364533	0.659742	0.360549	0.363738	0.747815	0.537941	-0.528686	0.375816	-0.61655	-0.180504	-0.404436	0.303631	0.465841	0.349836	-0.484701	-0.524821	-0.175204	0.118262	-0.00158582	-0.857765	-0.672508	0.468336	0.738761	0.465635
ADRA1A	-0.166257	-0.276159	-0.0767747	-0.0491493	-0.101086	-0.0161839	-0.100135	0.14266	0.116121	0.153516	0.042288	0.125582	-0.1307	-0.110865	0.183555	0.0872273	-0.0884109	-0.116917	-0.123378	-0.198277	-0.168325	-0.0809117	0.149261	0.0622282	0.209976	0.0997321	0.0447548	-0.19651	-0.123159	-0.0533345	-0.158643	0.0310366	0.197217	0.0877766	0.0605167	0.0982567	-0.132176	0.116332	0.0510092	0.112229	0.355897	-0.139377	0.0558252	-0.182341	0.126211	-0.0487071	0.0256596	-0.162886	-0.242676
ADRA1B	-0.192836	0.0957216	0.0557089	-0.375107	-0.261928	0.183016	-0.387367	0.0878024	0.0184836	-0.0311153	-0.153119	0.108456	-0.34171	-0.11132	0.42706	0.143636	0.262878	0.285218	0.0628008	-0.280721	0.19147	-0.162525	-0.153537	0.0125948	0.53606	-0.0844732	0.00182531	-0.110131	-0.311317	-0.15788	-0.160881	-0.250759	0.539763	-0.12848	0.372354	0.0505353	0.237685	0.188883	-0.000929132	0.213494	0.232897	0.0520895	-0.391499	0.733756	-0.0652828	-0.0767157	-0.0874643	0.201538	0.0688053
ADRA1D	-0.209907	-0.242877	0.0987143	-0.203181	0.0414908	-0.157972	-0.239091	-0.217697	-0.263549	0.157079	-0.149053	0.192996	-0.215748	-0.0739864	-0.0763896	0.240695	-0.185332	-0.0176647	-0.209501	0.0534399	-0.274638	0.114462	0.327071	0.0157928	0.0928538	-0.120084	-0.171669	-0.228674	-0.201324	-0.0919843	-0.15923	0.485648	0.0888108	0.383198	0.0357222	0.346464	-0.311996	-0.0262556	-0.117949	0.28629	0.168274	-0.0530044	-0.192836	0.101545	0.177982	-0.0819159	-0.133899	0.148189	0.0173488
ADRA2A	0.182565	0.0646085	-0.1101	-0.381424	-0.124004	0.0453653	-0.0668685	-0.0301341	-0.0611509	-0.0980816	0.147607	0.29129	-0.175588	-0.12331	0.52823	0.221609	0.0740531	0.275395	0.704379	-0.232538	0.0165517	0.147498	0.0296722	-0.393394	-0.157377	-0.441778	-0.222592	-0.286357	-0.12106	-0.233336	-0.203224	-0.037821	0.131123	0.103351	-0.190528	0.300496	-0.0041799	-0.223078	0.0215004	0.196462	0.0604854	-0.0648677	-0.208422	-0.0797128	-0.0332625	0.481137	0.211119	-0.0107385	-0.132919
ADRA2B	-0.391132	-0.131117	0.167874	-0.0616012	-0.236478	-0.222449	-0.10893	0.268752	-0.328965	0.4234	0.082601	0.193675	-0.245644	-0.498305	0.0564011	0.448752	-0.773823	0.0798531	-0.336804	-0.54416	-0.136356	-0.345197	0.17888	-0.270779	0.859895	0.27933	0.0624946	-0.417065	-0.121961	-0.291945	-0.242612	0.0902434	0.631565	-0.122636	0.0742331	-0.0143764	-0.0239613	0.0232346	0.235378	-0.0188566	0.204962	-0.450629	-0.187464	-0.292719	0.358209	-0.0166517	0.0520254	-0.262761	-0.0347903
ADRA2C	-0.271982	-0.289839	-0.30252	0.189685	-0.285169	-0.37411	-0.735062	-0.281115	-0.472041	-0.247214	-0.559841	0.0993036	-0.223527	-0.381011	0.253304	0.293548	-0.460832	-0.00811054	-0.324087	-0.055212	-0.0321494	-0.223527	0.238916	-0.0684197	0.547824	0.764288	-0.113133	0.0770235	-0.166621	0.11848	-0.11576	0.166816	-0.0573428	0.0457463	0.31119	0.376758	0.0679041	0.114644	0.327594	0.290707	0.292529	-0.221423	-0.166426	0.0456403	0.0504827	-0.237086	-0.163673	0.181026	-0.0696738
ADRB1	-0.130319	-0.151794	0.341027	0.174324	-0.137508	0.0674218	-0.0442696	0.0898777	-0.0789309	-0.0713879	0.358981	0.0167316	-0.19779	-0.0106413	-0.118961	-0.0274215	0.076323	0.199403	-0.0281669	-0.151395	-0.187627	-0.103269	0.230223	0.269928	0.143807	-0.143705	0.0971202	-0.0268512	-0.0570381	0.115041	-0.0315169	-0.0758401	-0.0422178	-0.314237	0.180691	0.138432	-0.392327	-0.138438	0.244854	0.0954733	-0.0693091	0.0166539	-0.110842	-0.0527399	0.0173488	-0.138828	-0.045631	0.0561884	-0.0199679
ADRB2	0.918728	-0.172659	0.0567613	-0.0546508	-0.360153	0.186543	-0.27373	0.124269	-0.368401	-0.394685	0.183947	-0.676237	0.589191	0.125095	0.089744	0.0362182	0.541474	0.368999	-0.0383724	0.303712	0.0230213	-0.24572	-0.0520398	0.359311	0.0391333	0.934892	0.437021	-0.60781	0.131531	0.60774	0.315837	-0.0287376	-0.152354	0.137568	-0.0416588	-0.219037	0.404572	0.4617	-0.183334	-0.0659763	-0.231392	0.269792	-0.176376	-0.231193	-0.279162	0.242246	-0.960393	-1.01568	-0.370471
ADRB3	-0.197077	-0.00158582	-0.00377086	0.0400245	0.0113249	-0.134029	-0.425069	-0.00967556	0.131574	0.187394	-0.00299137	0.444216	-0.129894	-0.21544	0.204169	0.27342	-0.492277	-0.235588	-0.241227	-0.0401743	-0.117111	-0.0211488	0.0650569	-0.0621889	0.222547	0.018722	-0.293137	-0.362508	-0.240994	-0.047844	-0.0928366	0.0308712	0.315739	0.339803	-0.0220901	0.377185	-0.0497078	0.0926294	-0.193876	0.226789	0.249329	0.0481299	-0.214088	0.0469383	-0.00413011	0.0338494	0.139798	-0.104994	-0.158749
ADRM1	0.00937978	-0.196846	-0.250759	0.0810999	0.0687819	0.0679992	0.0954369	-0.349587	-0.0468804	-0.280234	-0.110469	0.0111012	0.0634842	0.138946	-0.186755	-0.158607	-0.0492516	-0.440558	-0.000677823	-0.0957735	-0.265909	-0.245471	0.0895734	0.31113	-0.406234	0.0467893	0.0323967	-0.01911	0.14904	-0.0452313	0.192106	-0.112356	-0.429078	-0.203994	0.027815	-0.115252	-0.215587	-0.129186	0.025606	0.0732925	-0.314143	0.0500944	-0.0988332	0.110541	-0.171708	0.173069	-0.393571	-0.149182	0.0168086
ADSL	-0.0766406	-0.224288	-0.611035	-0.3782	-0.0456561	-0.226896	0.29227	-0.265835	-0.131186	-0.138404	-0.307214	-0.59019	0.0111778	0.434888	-0.57702	-0.864741	0.386232	-0.25082	0.0636527	0.11859	0.0789862	-0.271598	-0.377927	0.030656	-0.258247	0.0388601	0.557102	0.709018	0.503336	0.427544	0.706539	-0.364795	-0.00586523	-0.133501	-0.114225	-0.466941	0.394086	0.298635	0.0105227	-0.20495	-0.244372	0.187394	0.277033	0.00247869	-0.340491	-0.117313	-0.207781	0.0933387	-0.00685006
ADSS	0.138619	0.187061	0.0814494	0.205278	-0.0119652	0.0564011	0.088583	-0.0605224	-0.00845715	0.131194	0.138211	-0.00887455	0.153483	0.0894599	-0.137575	-0.149182	0.10448	-0.115138	0.0245587	0.100173	0.119473	-0.0327045	-0.0434619	0.153046	-0.0187816	0.134666	-0.0237945	0.109432	0.131643	0.123179	0.0962383	-0.0433573	-0.147861	0.0306836	-0.0207906	-0.00392954	0.030761	-0.011423	-0.0631519	-0.0932885	-0.103295	0.168701	-0.0401743	0.0940839	0.136969	-0.0673378	-0.00489702	0.0326064	0.228801
ADSSL1	-0.0860942	-0.308036	-0.00115175	-0.040656	0.0200546	-0.337697	-0.293448	0.0329089	-0.042172	0.12686	-0.0844732	0.268572	-0.157343	-0.0744249	0.0791686	0.28726	-0.0477896	-0.094555	-0.0834393	-0.137221	-0.462174	-0.00527502	0.390831	-0.435591	0.325374	-0.112527	-0.114537	-0.223272	-0.335694	-0.00379215	-0.129125	0.0889765	0.0486575	0.128633	0.199761	0.310089	-0.0798006	-0.126831	0.0165793	0.208004	0.0486575	-0.128511	0.177896	0.185952	0.168187	0.361411	-0.0201621	-0.0257542	0.00262238
ADTRP	-0.0512283	-0.292211	-0.101585	-0.155172	0.462241	0.280159	0.0588843	0.561034	0.218534	0.558919	-0.0909116	-0.152576	-0.183686	0.383975	-0.28038	-0.147658	-0.000727511	-0.200302	0.136487	0.0260908	-0.0126689	-0.135699	-0.193444	-0.523987	0.16178	-0.583834	-0.228726	1.42307	1.12377	1.60921	0.724156	-0.0739864	1.38733	-0.0269799	-0.244585	-0.231498	-0.15788	0.168892	0.709018	-0.33511	-0.337115	0.401891	0.368103	-0.0449184	0.335863	-0.145194	0.686319	0.403212	0.275811
AEBP1	-0.108828	-0.409492	-0.0543902	-0.0189065	-0.126021	-0.202753	-0.343432	0.153645	-0.0524635	0.0407194	-0.21168	-0.00243011	-0.154479	-0.0727906	-0.276966	0.0480358	0.127759	0.0720231	0.0896086	-0.257556	-0.186203	0.158567	0.487735	0.103917	0.0983192	-0.824814	0.141621	-0.251116	0.0624382	0.112398	0.115511	0.197442	-0.0510704	-0.246146	0.238723	0.0233179	-0.0713621	0.0134418	-0.267037	0.307054	0.00277709	0.241837	-0.370471	-0.288517	-0.172693	-0.16122	-0.0072871	-0.0353553	0.0971846
AEBP2	0.32398	0.00861875	0.225585	0.33466	-0.377034	0.19157	0.047732	-0.0158549	-0.19028	-0.138549	0.0168622	-0.0420959	0.0196888	0.284574	0.0115514	-0.175696	0.13921	-0.0964573	0.0618164	0.197046	0.198337	-0.152163	-0.0307427	0.0693147	-0.370868	0.234907	0.311036	0.153837	0.176321	0.174324	0.189554	-0.319718	-0.121997	0.191888	0.187525	-0.112527	0.29171	0.0991684	0.120794	-0.194089	-0.133328	0.0679992	0.371633	-0.0688897	-0.141506	-0.0996951	0.324062	0.398555	0.384238
AEN	-0.468045	-0.402909	-0.452031	-0.405815	-0.15173	-0.292589	0.0377882	-0.209733	-0.226405	-0.0556596	-0.326685	-0.158749	-0.55131	0.195605	-0.0592967	0.297981	-0.265083	0.00447179	-0.283508	-0.0524635	0.103881	-0.185736	-0.0591362	-0.187162	0.46017	-0.0630995	-0.101437	0.154824	0.0736261	0.24136	-0.0149448	0.103761	0.269189	-0.238052	-0.0985594	0.0216212	0.0229372	0.488927	0.0818178	-0.185173	0.238853	-0.239258	0.174191	-0.187377	-0.176281	-0.509617	-0.0491221	-0.264558	0.192897
AFAP1	0.651561	-0.430881	0.0274091	0.678782	0.0104651	-0.181733	1.00025	-0.26888	-0.0991382	0.0522632	0.30062	-0.158287	0.125923	-0.0210434	-0.161105	-0.044986	0.242727	0.0461457	0.684266	0.208896	0.500262	0.275326	0.739625	0.549888	0.210684	-0.0727906	0.175647	-0.019799	0.441473	0.249578	0.0968382	-0.00563461	0.0337039	-0.432202	0.249526	-0.284061	0.63901	0.398811	-0.0703658	-0.0901671	-0.280649	0.059509	0.218599	-0.305827	-0.333597	0.224295	-0.00163065	-0.307379	0.0346999
AFAP1-AS1	-0.216566	-0.286501	-0.126727	0.000280907	-0.0809117	-0.107254	0.0834023	0.13995	0.152702	0.147299	0.193188	0.235512	-0.21029	-0.326409	-0.0144199	0.0748146	-0.0959009	0.0568775	-0.0625417	-0.0691248	-0.216566	0.250257	0.326798	-0.0598015	0.3118	-0.279162	-0.209639	-0.400333	-0.215685	-0.047205	-0.178389	0.166006	-0.102619	0.058009	-0.0864136	0.285071	-0.405175	-0.392327	0.189975	0.00586053	0.0961381	0.0133078	-0.230419	-0.0434359	-0.0946092	0.410982	-0.0973795	-0.0879894	0.0650569
AFAP1L1	0.311275	-0.179994	0.173368	0.483391	0.206727	-0.133291	-0.0237945	0.0213159	0.425924	0.204577	0.0125948	-0.00805102	-0.0799225	-0.149613	0.0484181	0.0706469	0.0982567	0.113844	0.110214	0.188153	-0.129694	-0.0523256	0.189459	-0.067361	0.177332	-0.313626	-0.280649	-0.0615768	-0.136537	-0.02171	-0.252089	-0.0674992	-0.0103496	0.0491858	-0.0581477	0.225272	-0.014611	0.0258178	-0.0214203	-0.0787663	0.578307	0.260325	0.050596	0.0191177	0.0821462	-0.25871	0.249214	-0.0490488	0.120479
AFAP1L2	0.273009	0.255703	-0.45002	0.0899065	-0.191	0.00693274	-0.357404	-0.0915729	0.0403816	0.754231	-0.04988	-0.0741017	-0.314721	-0.25465	0.246405	0.313797	0.353402	0.702872	0.096528	-0.0995803	-0.0919579	0.103953	0.186497	-0.0103496	0.0523685	0.170578	-0.154254	0.310627	0.0258946	0.227733	-0.132205	0.0935088	0.105132	0.257571	0.488927	-0.0226438	-0.203589	0.131316	0.0582339	-0.162379	-0.0633841	0.385057	0.203801	-0.227251	0.529474	0.204029	-0.120376	-0.154714	-0.0533843
AFDN	-0.0909116	-0.0881389	-0.141008	-0.00952869	-0.00593728	-0.0767747	0.070551	0.0026435	0.0492159	-0.139603	-0.0935225	0.029299	-0.0958046	-0.0330228	0.266056	0.0366875	0.0742034	-0.0074934	0.0728127	-0.0890048	0.198897	0.0705823	0.0613424	0.208678	0.0437811	0.474687	0.0884957	0.0589425	-0.0241695	0.0403816	-0.0662014	0.128225	-0.0283476	-0.23742	-0.0497078	-0.00925978	0.0602696	0.0464886	0.108524	-0.194305	0.123646	-0.0133883	0.108296	0.204669	-0.0437224	-0.215853	0.00810491	0.175647	0.0280981
AFDN-DT	0.234626	-0.120977	-0.156261	0.291151	0.0628296	0.924609	0.22048	0.194615	-0.123727	0.435332	-0.167469	0.531408	0.233707	0.00593689	0.145357	0.00578559	-0.107529	0.0111524	-0.0416089	-0.355704	0.224348	-0.206685	-0.0902246	-0.287001	-0.174132	-0.229987	0.00439734	0.0787101	0.0891983	-0.257012	0.0160199	-0.304469	-0.0989609	0.0260441	0.163325	-0.0125352	-0.233818	-0.135324	0.161911	-0.111206	0.0310914	0.129967	0.156788	0.427372	-0.132579	-0.0304005	-0.00967556	0.317892	0.0368313
AFF1	-0.147341	0.247222	0.326081	0.270626	0.254046	0.355579	0.00854421	-0.0713879	0.0307827	-0.285943	0.178524	0.0836629	0.0815193	0.00427493	-0.128181	0.068249	0.112229	0.0397011	-0.126566	0.0610808	0.0124627	-0.322857	-0.202981	-0.190368	-0.0814494	-0.606812	-0.0598808	-0.0668109	-0.101614	-0.183334	-0.0678106	-0.20418	-0.355217	-0.192107	-0.126232	-0.000753801	-0.0830421	-0.0956728	-0.253631	0.672575	-0.209373	-0.268796	-0.104868	0.00685605	0.000211397	0.0482638	0.618319	0.373744	0.431043
AFF2	0.0735372	-0.1195	0.0537304	-0.0291328	0.255746	0.126488	0.0414437	0.098554	0.0933717	0.129856	0.22277	0.0665188	0.0167547	-0.151395	0.0859029	-0.0186571	-0.0140866	0.0228277	0.228071	-0.27821	-0.201363	0.163056	-0.106049	-0.147658	-0.00980057	-0.195074	-0.354298	-0.294798	-0.180947	-0.182523	-0.280848	0.13944	-0.0177901	0.266506	0.201281	0.0417769	-0.133838	-0.0678106	-0.233235	0.28228	0.164783	-0.224113	-0.270104	-0.0953448	0.130143	0.0158418	0.215208	-0.0193586	-0.034621
AFF3	0.0209223	0.0696235	0.0827892	0.0639735	0.741329	0.590183	0.0788026	0.34188	0.00654602	0.0939026	0.288156	0.0977255	-0.0639296	0.130833	0.631055	0.385615	0.0636206	0.0786808	0.271854	0.0121214	0.218105	0.688419	0.0818395	-0.0665668	0.0174518	0.23279	0.180345	0.0243595	0.150155	0.421571	0.0707134	0.108981	0.0131753	0.404572	0.296728	0.109167	0.310961	0.146837	0.225976	-0.020186	0.179358	0.187209	0.303163	0.278122	0.366629	0.138211	-0.0501087	0.001852	0.189223
AFF4	0.123571	-0.101876	0.00554565	0.223882	-0.011573	0.106488	0.0263783	0.0251642	-0.043868	-0.213864	-0.121362	-0.0915182	0.0838204	0.16187	-0.0598259	-0.189916	0.0874449	-0.161634	0.106688	0.0620774	0.0558579	0.137318	-0.265347	0.0798531	-0.291142	0.0932424	0.131643	0.160315	0.0911731	0.0617571	0.0355889	-0.0371033	-0.174362	-0.102973	-0.0750533	-0.116639	0.0165998	0.0789862	-0.0905216	0.00982203	-0.137433	0.0876837	-0.00700678	-0.101681	-0.0384278	0.0374814	0.0849896	0.105196	0.240124
AFG1L	0.0697231	-0.066595	0.0407194	0.0516001	-0.137543	0.112817	0.0136061	0.0823791	0.53344	-0.0627935	0.00514582	0.5871	-0.128085	-0.0407921	-0.0142451	0.0069576	-0.165755	-0.114137	-0.054117	0.0249133	0.142476	0.0561336	0.0443835	-0.104929	-0.112107	-0.0270252	0.00710337	0.0764436	0.0208494	-0.104994	0.00662326	0.0461678	0.0280444	0.0862199	0.274444	-0.00322627	-0.0995178	-0.0796634	-0.0620495	0.187147	0.0519352	-0.115532	-0.121997	0.0455024	-0.0738991	-0.135753	0.0478062	0.0710918	0.0327048
AFG3L1P	-0.0228514	-0.20787	-0.0576563	-0.112234	0.0978908	0.195694	0.0896086	0.0309842	-0.0829977	-0.0751963	-0.0837666	-0.123837	-0.0236694	0.217546	0.0434331	-0.352971	0.217546	0.121043	0.307584	0.0911731	0.0730589	0.0489398	0.0836629	0.118262	-0.164204	-0.0663506	0.247222	0.0648332	0.144	0.156177	0.105563	-0.131917	-0.0810618	-0.051342	-0.0139247	-0.193319	0.141856	-0.0177901	-0.0202114	-0.238933	-0.122197	0.177682	0.106589	0.211721	0.0871928	0.00791021	-0.0326582	0.0021568	0.122427
AFG3L2	0.118335	-0.126631	-0.250275	-0.0516758	-0.0482749	-0.0298667	0.107216	-0.14397	-0.259148	-0.184816	-0.0615484	-0.011647	0.07715	0.312636	-0.31071	-0.283054	0.0437811	0.018111	0.336834	0.0899065	0.115289	0.0179552	-0.175541	-0.0342298	-0.334154	-0.109321	0.285487	0.336756	0.309768	0.221371	0.232897	-0.183292	-0.148296	-0.179956	0.2143	-0.260616	0.168229	0.0490233	-0.00637066	-0.136427	-0.217546	0.450747	0.183912	0.184843	-0.108048	-0.192146	0.0368026	-0.00772725	0.238981
AFM	0.0490526	0.467688	0.200271	-0.220366	0.111383	0.020211	0.00864482	-0.0230382	1.1916	0.445382	0.275952	0.107688	0.0947977	0.071716	-0.0268985	-0.0125909	0.0138339	0.454641	-0.0477323	0.231684	0.194667	-0.133666	-0.10596	-0.152276	-0.0091274	-0.108352	-0.021073	-0.279018	-0.0196787	0.0953952	-0.208567	0.220805	0.0282273	0.232897	0.11237	-0.196465	-0.045375	0.197297	-0.222449	0.144506	0.00633133	-0.224288	0.0963021	-0.0607038	0.306911	-0.402909	0.226246	-0.370636	-0.153436
AFMID	-0.345504	-0.00262512	0.198806	-0.151107	-0.0148943	-0.689357	-0.298879	-0.148626	-0.212524	0.0836917	0.023995	0.159506	-0.392747	-0.155939	-0.154407	0.462796	-0.24044	-0.0120372	-0.511279	-0.406234	-0.346479	0.117232	-0.00972879	-0.0858081	0.0969267	-0.16383	0.0489641	0.00292893	-0.149819	0.164662	-0.234921	-0.0226438	0.263128	0.181407	0.336241	0.26194	0.150732	-0.0482152	-0.0273987	0.0130638	0.11812	-0.280234	-0.106049	-0.310309	-0.0210982	-0.118901	0.172737	0.0924643	-0.162812
AFP	-0.191366	-0.51358	-0.0759905	-0.447748	0.0815807	-0.307608	-0.288302	0.159506	-0.0862597	0.671978	-0.285481	0.373624	-0.459629	-0.435591	-0.302967	0.351766	-0.502409	-0.360547	-0.453836	-0.311167	0.0846056	0.603478	-0.155777	-0.574667	-0.0729565	-0.221674	0.0102822	-0.056559	0.0570093	0.053109	-0.0948632	0.063999	0.175769	0.404327	-0.531806	0.649367	-1.03004	-0.0766126	0.371287	0.454641	0.680006	-0.102861	-0.0672573	-0.696582	0.615885	-0.0815868	-0.177497	0.281688	-0.0961534
AFTPH	-0.0445382	0.413399	0.271726	0.16978	-0.0107854	0.0867022	0.0986833	-0.050758	0.0782239	-0.231392	0.120681	-0.18004	-0.0782998	0.08527	0.120861	-0.202937	0.212071	-0.0360993	0.170413	0.234963	0.165405	-0.112202	-0.103151	0.0875281	-0.219373	0.0927981	-0.0716125	0.228861	0.165685	0.163601	0.147948	0.0455024	-0.148626	0.0901495	-0.146629	-0.0350988	0.173768	0.104335	0.00430593	-0.21544	-0.214482	0.212127	0.357212	0.237113	0.0932424	0.184938	-0.118929	0.0832637	0.176008
AGA	-0.394151	0.474687	0.0197685	-0.105831	-0.242612	-0.491695	-0.124004	-0.200745	-0.184005	-0.172779	0.00507396	-0.336277	0.780775	0.139759	0.524897	-0.463797	0.0190099	-0.25951	0.0864006	0.0360324	0.0298866	-0.420294	-0.0974698	0.293898	-0.476958	0.0648332	0.360669	0.1925	0.557475	0.0399181	0.602094	-0.226302	-0.764485	-0.042906	-0.286766	-0.535818	0.335777	0.493145	-0.107835	0.0496256	-0.25082	0.130905	0.508768	0.0865499	0.264705	0.225534	-0.462836	-0.371231	0.172872
AGAP1	1.2718	0.29339	-0.331904	-0.0355362	-0.312319	-0.177793	0.824497	0.358981	0.374119	-0.179994	0.457468	-0.00611659	0.219669	0.188014	0.784338	0.142435	0.377726	0.351976	0.637951	-0.00780738	0.0231393	0.129385	0.0456707	-0.360449	-0.0505913	0.886157	0.12659	1.04578	0.0493827	0.287874	0.15829	0.0236521	-0.124962	0.443881	-0.175381	0.243246	0.418231	0.454258	0.0300584	-0.104022	0.145401	0.247679	-0.0652543	0.633191	-0.0983929	0.159823	0.241542	0.428552	-0.0163894
AGAP11	0.113978	-0.0813955	-0.133328	0.302325	-0.0321726	-0.194262	-0.240616	0.108421	-0.0673891	0.112653	-0.160881	-0.0210143	-0.270723	-0.0821466	-0.304919	0.236073	-0.248894	-0.152685	-0.0298898	-0.0760664	-0.15288	0.175769	0.031917	0.027815	0.247497	-0.0460655	-0.0985594	-0.0862029	0.0644321	0.0689193	-0.054679	0.0909866	0.155527	0.204621	0.16906	0.201789	0.0870939	-0.149469	0.023919	0.0467358	0.261254	-0.278953	0.028767	-0.311996	-0.0946974	0.00297972	0.00569206	-0.0103753	0.0886201
AGAP2	-0.210904	-0.112202	-0.0382215	-0.156217	0.0672188	-0.0918444	-0.0502865	-0.15458	-0.296136	0.0138339	-0.107107	-0.0262299	-0.107529	-0.092649	0.202362	0.0970516	0.014627	-0.130865	-0.200745	-0.368743	-0.160031	-0.170131	-0.043044	0.0138882	0.308764	0.0900249	-0.156705	-0.205427	-0.0832366	0.0123334	-0.314906	-0.173262	0.0177851	-0.376053	0.0115229	0.135019	-0.0355094	0.173368	-0.305176	0.199719	0.198979	-0.0840152	-0.373876	-0.0792557	-0.0875269	-0.199738	-0.0811174	-0.095261	-0.0856394
AGAP2-AS1	-0.0582995	0.209828	-0.391745	-0.150994	0.196652	-0.557374	-0.261428	0.0883475	0.041679	0.312308	0.0496256	0.150605	-0.328715	-0.7447	-0.394536	0.348374	-0.263132	0.59755	-0.305579	-0.0866701	-0.079491	0.235318	0.291562	-0.0611789	0.59801	-0.381155	-0.308823	-0.271653	-0.542167	-0.274696	-0.726869	0.368891	0.327753	0.28629	0.662679	0.614884	-0.155939	-0.282279	0.467293	0.647194	0.358345	-0.165639	-0.154407	0.174621	0.12051	-0.422878	0.130519	0.135019	0.0197434
AGAP3	0.0326064	-0.0158262	-0.0067796	0.0207099	0.103449	0.0725228	0.11763	-0.0240742	0.238853	-0.0337152	0.29171	-0.0074151	-0.0903251	-0.071223	-0.0856689	0.237336	-0.034058	0.0859975	0.0320919	-0.233869	-0.130019	-0.183052	0.0462951	0.102657	0.0563721	-0.0893872	-0.158643	-0.2274	0.0388149	-0.0644845	-0.188016	0.0779329	-0.142161	0.166954	0.475903	0.0840378	-0.0978685	0.0690564	0.0377008	-0.0896937	0.10509	0.0822301	-0.199485	0.137003	0.285354	0.0267309	-0.144164	0.0868946	-0.175503
AGAP4	0.914054	0.011448	-0.200598	0.208722	0.338178	0.43517	0.176971	0.0628296	0.503336	-0.0309897	0.0563251	0.0594801	0.148154	0.351052	0.0340891	-0.0867224	0.612191	0.102325	0.327237	0.40713	0.277504	0.486982	-0.0180779	0.221138	-0.467798	0.357456	0.381309	0.124232	0.127759	0.191793	-0.0242963	0.000382752	0.00649462	-0.161177	-0.0906878	-0.342868	0.0643791	0.112916	-0.249334	-0.0397618	-0.154367	0.403041	0.281908	0.421252	0.201694	-0.261735	0.270899	-0.0973236	0.109304
AGAP6	0.300138	0.0599408	-0.148559	-0.209777	0.33119	0.117386	0.289498	-0.0312713	0.145479	-0.045375	0.467293	0.0635045	-0.120875	-0.00115175	-0.0856114	-0.0302349	0.0414437	0.43885	0.0928538	0.0443835	0.141272	0.0332515	0.0615762	-0.0737508	0.000382752	0.12668	-0.164083	0.042216	-0.0960599	0.101093	-0.11544	0.297807	-0.00276031	-0.00522744	-0.142379	0.0982895	-0.0872999	0.3753	0.104923	0.144925	0.149383	-0.0374446	0.0464886	-0.484971	0.365509	-0.144164	0.18899	0.149801	0.148226
AGAP9	-0.292149	-0.279582	0.0794975	0.452296	0.458043	0.193188	-0.0862299	0.0997321	0.0419711	0.106114	0.120794	-0.612676	0.203801	0.519134	-0.162969	-0.254194	0.666045	-0.11992	-0.0488583	0.103953	0.234248	0.192458	-0.173308	0.387777	-0.210608	-0.248055	0.0998563	0.0871536	0.363472	0.152275	0.225636	-0.504575	-0.0292314	0.37306	0.218534	-0.0836384	0.259622	0.320186	-0.180504	-0.449396	-0.370868	0.10786	0.474217	0.693074	0.175338	-0.0693959	0.121492	0.188014	0.174324
AGBL1	-0.222223	-0.147901	0.181574	0.23212	-0.0142451	-0.121997	-0.197378	0.318061	0.364087	-0.187891	0.35844	0.909349	-0.184735	-0.252035	0.179975	0.306345	-0.161072	-0.0054303	0.142883	0.0598202	-0.120649	-0.28474	-0.117471	-0.316676	-0.0846207	-0.778307	-0.305336	-0.249864	-0.132651	-0.166998	-0.290402	0.077841	-0.082974	0.769491	-0.0830715	0.0558856	0.0306119	-0.0745356	0.0990662	0.0508626	0.210478	-0.220585	0.0780109	-0.0931856	0.790152	0.0443072	0.319153	-0.0879264	0.00937978
AGBL2	-0.363657	-0.259895	-0.00184676	0.0761824	0.42141	-0.133169	-0.0831549	-0.134229	-0.17787	0.187924	-0.114936	-0.106735	-0.0284494	0.53198	-0.121867	0.176429	-0.0297447	-0.378927	-0.20718	-0.466713	0.153188	0.00544401	0.39499	-0.336914	-0.0258558	0.181792	0.412575	0.172737	0.172442	0.279695	0.114871	0.144573	-0.0779742	0.343592	-0.320217	0.646688	0.0695922	0.297058	0.809518	0.231917	-0.0690461	-0.336704	0.40233	-0.0418474	0.471589	-0.574667	-0.389709	0.387948	0.0650861
AGBL3	-0.0561662	-0.0217814	-0.0422958	0.217829	-0.156217	0.15833	0.116818	-0.125346	0.0138655	-0.0425584	-0.0247618	-0.0178936	0.316509	0.251021	-0.0770363	0.0625843	0.0458791	-0.0813955	0.153599	-0.076197	0.18408	0.0207363	0.281613	-0.141369	-0.174703	0.0361409	0.274444	0.220232	0.0174518	0.0544643	0.371751	-0.117539	-0.00826967	-0.0825326	-0.138865	-0.0510477	-0.0601225	0.0645792	-0.00743915	-0.046735	-0.104386	0.0384463	0.0174755	-0.052953	-0.2479	0.0510092	-0.068528	0.0899624	0.127858
AGBL4	-0.195494	0.285617	0.022128	-0.154714	-0.111288	-0.252035	-0.190073	0.25557	0.0614679	-0.101298	0.0639165	0.186772	-0.0181535	-0.0119393	0.224348	0.00613194	-0.0914068	0.225791	-0.0680852	-0.200497	0.104231	0.0756603	0.0407495	-0.00513439	0.175292	0.100737	-0.0989292	0.0649739	-0.0440585	-0.181522	-0.173426	0.0692875	0.131766	0.198151	-0.126926	0.100433	-0.0172752	0.117415	-0.118741	-0.149013	0.112229	-0.129797	0.181531	-0.145338	-0.0273068	0.259375	-0.0486804	0.0458535	0.104832
AGBL5	-0.23345	-0.00558178	-0.144506	-0.409154	-0.305999	-0.133398	-0.23764	-0.167107	-0.357629	-0.143824	-0.293137	0.0618415	-0.309987	-0.026398	0.161204	0.359784	-0.163673	0.230808	0.172122	-0.106172	-0.246834	0.0669867	-0.0672573	0.116786	0.0613176	0.169629	-0.00813908	-0.131346	-0.0759299	0.102688	0.0869518	-0.0227746	0.147144	0.101005	-0.0528432	0.27296	-0.0253528	0.0778665	0.157451	0.413849	0.243186	-0.332925	-0.0510704	-0.250275	0.2169	0.0226946	-0.129588	-0.0245615	-0.00332902
AGER	0.0181594	-0.183256	-0.00456837	-0.118101	-0.15458	-0.156053	-0.425556	-0.180084	-0.0707339	0.0428428	-0.500396	-0.0872188	-0.263683	0.0122323	0.197643	0.271726	-0.552179	-0.402076	-0.287942	-0.2497	-0.39053	-0.147861	0.701618	-0.0380724	0.27342	0.362813	-0.110048	0.0314983	-0.373663	-0.451817	0.0524708	-0.0178628	-0.493818	-0.240342	0.198709	0.129819	-0.260143	0.0979704	-0.0895407	0.00236933	0.0187709	-0.112036	-0.0894234	-0.331174	0.00720785	-0.19779	-0.231244	0.149598	-0.0539861
AGFG1	-0.0443953	0.160396	-0.0913795	0.111519	-0.0299199	-0.021172	-0.0353818	-0.117925	-0.141403	-0.114324	-0.112036	-0.272626	0.0200546	0.102463	0.139249	-0.203278	0.247618	-0.201402	0.0674822	-0.0565363	-0.0704305	-0.129313	-0.177978	0.321898	-0.20824	0.162123	0.0458275	0.141075	0.113878	0.176521	0.149646	-0.0772338	-0.12118	0.0564979	-0.108084	-0.149469	0.066457	0.384849	0.112749	-0.135456	-0.155581	0.142588	0.100535	0.310257	0.0618946	-0.044244	-0.150714	0.000872525	0.103881
AGFG2	-0.00415518	-0.195851	0.0529302	0.0837878	0.0721961	0.0446506	0.219414	0.0980461	0.0738691	-0.0440585	0.121453	0.0371865	-0.142525	0.0736261	0.0930007	0.131643	-0.0946092	0.0860262	0.130665	0.125658	-0.00644047	0.0220972	0.041834	-0.0302575	0.104095	-0.203418	-0.064649	0.0162549	0.0589425	-0.0569606	-0.021735	0.127166	0.052497	0.157647	-0.0380724	0.0592937	-0.108387	-0.0972325	0.160315	0.00164772	0.132225	0.166387	0.082689	0.172519	0.129856	-0.16141	0.0721335	-0.0497789	-0.106357
AGGF1	0.162822	0.0284738	0.107216	-0.00322627	-0.156301	0.0755938	0.0172095	0.0510092	-0.105471	0.0938091	0.0703949	-0.139305	0.327676	0.191843	-0.0488583	-0.13927	0.234788	-0.130642	-0.0321228	0.165909	0.159823	-0.074204	-0.372073	-0.0150928	-0.126759	0.0117514	0.343799	0.413131	0.248127	0.303863	0.279142	-0.165361	-0.112234	-0.0982633	-0.17086	0.00883507	0.29833	0.291422	0.0973422	-0.142379	-0.153995	0.223597	0.0856532	0.297396	-0.0198465	-0.323897	0.00856687	0.0563721	0.147498
AGK	0.249766	0.0338735	-0.397326	-0.157608	-0.273349	-0.0455737	0.138055	-0.0877102	-0.121961	0.00606785	0.00705309	-0.0572808	0.0180578	0.372718	-0.230105	-0.353423	0.153361	0.0279903	0.0386201	-0.0655427	0.30178	-0.126792	-0.0986381	-0.269904	-0.116172	0.346685	0.411975	0.274979	0.311437	0.0393856	0.203564	-0.245002	-0.0964573	-0.0999881	0.0140943	-0.20654	0.19263	-0.108218	0.0569535	-0.27365	-0.30222	0.0291104	0.0528151	-0.0126464	-0.283767	-0.0997625	-0.0725758	-0.118901	0.264224
AGL	0.797161	0.158908	-0.076584	0.0429288	-0.510498	0.316004	0.45914	0.223656	-0.34132	0.350336	0.32425	-0.48711	0.805341	0.717156	-0.0190105	-0.347541	0.430369	0.057815	0.872369	0.833633	0.955636	0.193567	-1.1824	-0.173577	-0.563805	0.40571	0.523504	0.892138	0.539763	1.39528	0.698003	-0.136027	0.228475	0.661648	-0.0968983	-0.25871	0.75619	0.451402	0.866765	-0.533782	-0.127735	0.211064	0.794655	0.421736	0.0841635	-0.0797128	-0.222847	-0.181971	0.165099
AGMAT	0.0646982	-0.321703	-0.226451	-0.0454622	0.385505	0.290214	0.147144	0.120204	0.0144245	0.198571	0.126132	0.0225934	-0.0695063	0.198528	-0.275667	-0.151441	-0.0100175	0.089812	0.42269	0.128964	0.0899326	0.0416012	-0.0930185	-0.0786279	-0.0445382	-0.234289	0.170283	0.445382	0.116226	0.439195	0.230223	-0.0186853	0.141499	-0.0015116	0.200007	-0.013026	0.119618	0.376393	0.0142984	-0.0376528	-0.0171084	0.346812	0.464428	0.279971	0.0708593	0.0116957	0.462422	0.453502	0.107489
AGO1	0.0790711	0.240334	0.229828	0.199761	0.333367	0.0803419	-0.0360227	-0.180735	0.351598	-0.227665	-0.153673	-0.0109052	0.0992354	0.155892	0.203997	0.112439	0.275811	-0.0862597	0.336925	-0.000254792	0.128338	0.354332	-0.0648924	0.459618	-0.0697294	0.479386	0.0824447	0.0461678	0.113213	0.0461678	0.264572	0.233661	-0.272689	0.19824	-0.313352	-0.0843232	0.169999	0.45602	-0.184399	0.0266525	-0.0910216	0.151042	0.110141	0.278544	-0.129622	-0.120712	-0.243413	0.111741	-0.314721
AGO2	-0.188053	0.0486575	0.120717	0.201587	0.0249646	0.0944657	0.218105	-0.191451	0.0620166	-0.214658	-0.117111	-0.137865	0.127759	0.0577101	0.0986238	0.218799	0.0380745	0.139588	0.111559	-0.000555411	-0.0788447	0.123755	-0.201053	0.189517	0.0847708	0.13921	-0.0359219	0.249214	0.0427099	0.0667765	0.133049	-0.00289166	-0.122197	-0.114113	-0.282084	-0.249756	0.228524	0.363036	-0.284664	-0.190368	-0.0247873	0.136855	0.12686	0.246525	-0.101131	0.07452	0.0913752	0.33054	0.288092
AGO3	0.320186	-0.00428335	0.147328	0.547343	0.0819263	0.174324	0.0533275	-0.167498	0.268636	-0.0685008	-0.0140866	-0.212446	0.33635	0.485648	0.332813	-0.0315169	0.540063	-0.210234	0.129306	0.323414	0.198434	0.171517	-0.234705	0.257195	-0.0175007	0.27617	0.317551	0.305468	0.167874	0.227514	0.295321	-0.0532739	-0.175346	-0.221143	-0.505885	-0.0982074	0.298475	0.426557	0.144888	-0.258846	-0.469693	-0.00832394	0.367498	0.209323	-0.143389	-0.392181	-0.329059	0.0859329	-0.131949
AGO4	-0.0090312	0.528879	0.266446	0.316595	0.0933028	0.484941	0.111486	0.0254561	0.215318	-0.346085	-0.0972663	-0.128547	0.369989	0.0222365	0.458936	-0.0249054	0.541178	-0.021273	-0.210853	0.0711595	0.0938091	0.0538894	-0.126692	0.558175	0.0258389	0.599994	-0.170779	0.00200219	-0.000753801	-0.124456	0.088909	0.104161	-0.395403	-0.00422963	-0.296136	0.0643791	0.0972462	0.310483	-0.307608	-0.0861729	-0.241947	-0.138649	0.20213	0.147063	-0.117375	-0.02171	-0.199779	-0.0010104	-0.375576
AGPAT1	0.0300785	-0.0500244	0.0498455	0.066175	0.31408	-0.0237729	0.339195	-0.342666	0.169426	-0.354999	-0.0440017	0.466855	0.178524	0.0825095	-0.00753593	-0.0658697	0.103047	-0.124931	0.29956	-0.0821466	-0.273593	0.0179251	0.353914	0.147144	0.104767	-0.0791464	0.0771145	-0.162344	0.135736	-0.0323717	0.168274	-0.0868434	-0.277807	-0.140643	0.264175	0.0258689	0.156005	-0.240289	0.0533275	0.0147673	-0.251296	0.368762	-0.216758	-0.140853	-0.18337	0.330357	-0.540738	-0.554682	-0.525976
AGPAT2	-0.3176	-0.325345	-0.0103249	-0.13927	-0.110411	-0.326409	-0.432363	-0.185736	-0.260925	-0.125473	-0.357749	0.0176177	-0.288178	-0.342959	0.0526963	0.119852	-0.128722	-0.327487	-0.107276	-0.252035	-0.592613	-0.0250608	0.260396	0.150357	0.15332	0.11295	-0.401604	-0.369108	-0.151179	-0.0852907	-0.0368134	0.0302214	-0.131088	-0.0653398	-0.0480886	0.0534711	-0.20387	0.158698	-0.221674	0.0629334	0.132655	-0.0192042	-0.295368	-0.282676	-0.0613173	0.00856687	-0.255743	-0.0528999	-0.255337
AGPAT3	-0.186122	-0.161767	-0.101165	-0.290458	-0.0219238	-0.177662	-0.0571998	-0.335218	-0.350396	-0.0882409	-0.218746	-0.170094	-0.208325	0.0729299	-0.00882459	-0.13461	-0.00632748	0.00482728	-0.165403	-0.0827498	-0.0553972	-0.240945	-0.0820559	0.0434056	-0.221528	-0.0230382	0.0713586	0.0487463	0.148485	-0.00247692	0.250728	-0.0398137	-0.054809	0.127166	-0.0481316	-0.318877	0.0330462	0.109097	-0.494974	-0.0439487	0.0128638	0.0378103	-0.126263	-0.000956499	-0.214525	-0.0484686	0.211779	0.0739025	0.247841
AGPAT4	0.150276	0.00521267	-0.459399	-0.54847	-0.210141	-0.221372	-0.202842	-0.188721	-0.0804419	-0.210047	-0.163631	0.00883507	-0.483308	-0.383602	-0.232299	-0.0454622	-0.0890639	0.474897	0.106925	0.0194204	0.124635	0.0668587	-0.0462094	0.0385934	-0.136318	0.444536	-0.166621	-0.518503	0.101672	-0.459826	-0.097198	-0.448024	-0.342371	-0.694881	-0.365374	-0.248781	-0.082826	-0.102495	-0.23742	-0.188097	-0.0642905	-0.396268	-0.115113	0.190876	-0.00758634	-0.151794	-0.14323	-0.0301341	0.12826
AGPAT4-IT1	0.0988998	-0.122668	-0.619284	-0.231557	-0.271598	-0.282344	-0.106049	-0.0859551	-0.058569	-0.480998	-0.139377	-0.209907	-0.344222	-0.103269	0.397089	-0.433942	-0.0871269	0.360549	0.0787342	0.297469	0.177558	-0.0953448	-0.281055	-0.334251	-0.624895	0.497788	0.0336332	-0.276814	-0.028837	-0.163712	0.159904	-0.0196015	-0.594488	-0.757177	-0.557374	-0.328636	0.113844	-0.183885	0.106589	-0.227251	-0.129216	0.0318573	-0.490637	0.540063	-0.160503	-0.0377973	-0.0684197	0.0638622	0.275198
AGPAT5	0.01898	0.134354	-0.360645	-0.0271911	-0.130475	0.399593	0.469558	-0.10564	0.236582	0.325726	0.173557	-0.307144	0.310627	0.37947	-0.509101	-0.252806	0.212903	0.0987143	0.186634	0.531058	0.616805	0.0652937	-0.473433	-0.020186	-0.447654	0.129103	0.181326	0.21339	0.296492	0.861219	0.371633	-0.193876	0.0291397	0.104296	-0.135359	-0.287813	0.433614	0.0771145	0.113585	-0.105529	-0.118929	0.199261	0.520369	0.200912	0.107249	0.141157	0.519726	0.275248	0.302325
AGPS	0.765253	0.31408	-0.232013	-0.188016	-0.263019	-0.0857239	0.00613194	-0.0220901	-0.320295	0.0405588	0.285218	-0.286766	0.409421	0.299647	0.0104913	-0.381561	0.234461	-0.117979	0.0706121	0.44336	0.547343	-0.225253	-0.285402	-0.187288	-0.508844	0.310257	0.144085	0.249095	0.268699	0.212721	0.487995	-0.289132	-0.260439	0.350658	-0.219982	-0.283425	0.299161	-0.137652	0.329909	-0.258537	-0.237128	-0.0630681	0.13995	-0.312975	-0.00463638	-0.0512283	-0.135226	-0.3716	-0.0162353
AGR2	0.206727	-0.00874833	0.118262	-0.0235411	0.0680682	-0.0629067	0.0241369	0.13751	0.183735	0.304216	0.0872947	0.462422	0.047125	-0.430004	-0.109018	0.138577	-0.127801	0.160597	-0.310798	-0.120977	0.13219	0.212431	-0.00476642	0.0903963	0.178029	-0.433376	-0.184133	-0.0293011	-0.191529	-0.22553	-0.132651	0.202999	0.112653	-0.0646064	0.125658	0.0646085	-0.476087	-0.281764	-0.0465717	0.036347	0.238981	-0.279582	0.0458535	0.0310366	0.259622	0.0835615	0.0618719	-0.187587	-0.112912
AGR3	-0.148909	-0.202937	0.345398	-0.198321	0.261254	0.0370449	0.0120511	0.278344	0.168529	-0.115958	0.0302214	-0.0018158	0.179923	-0.207299	-0.0865333	-0.00976337	0.111961	-0.0339853	0.0233645	-0.0458463	0.0288782	0.563445	0.0397734	0.122288	0.00989186	0.123571	-0.153337	-0.133466	-0.0430681	-0.213585	-0.140473	0.619169	0.30513	-0.226547	0.00230908	0.154509	-0.484012	-0.187738	-0.26647	-0.228124	0.103077	-0.202261	0.0561072	-0.320217	0.0148157	0.53344	-0.011086	-0.0242705	0.111849
AGRN	-0.242467	-0.376643	-0.167193	-0.249864	-0.189709	-0.436639	-0.397463	-0.17656	-0.295368	0.0917996	-0.170203	0.00793872	-0.407958	-0.205598	-0.192268	0.218332	-0.36501	0.0316726	-0.185621	-0.35209	-0.422524	-0.130508	0.0972746	-0.215947	0.290214	0.0866751	-0.0451792	-0.362621	-0.252035	-0.235138	-0.176195	-0.147406	0.0806922	0.14619	-0.00949117	0.259175	-0.274453	-0.193009	-0.0382215	0.146878	0.163524	-0.152456	-0.104738	-0.220413	0.118946	-0.215989	0.168937	0.252212	0.00277709
AGRP	-0.125314	0.137003	-0.103774	0.276697	-0.281326	-0.108419	0.00748092	0.289563	0.120369	0.268382	0.420811	0.266375	0.139403	0.0282749	-0.0566954	-0.0736918	0.00490291	-0.0347187	-0.10307	-0.257268	0.12964	0.0407729	0.17612	0.0638109	0.890938	-0.269714	-0.233235	-0.176646	-0.325041	-0.35512	-0.149013	0.0446743	0.348264	0.274798	-0.021197	0.172442	-0.197426	-0.522372	-0.536126	-0.0357321	0.324878	0.0838535	0.110407	0.30076	0.379586	0.260615	-0.0483678	0.208057	-0.0732807
AGT	0.30394	0.0757173	0.300995	0.299161	0.500262	0.189418	-0.0556596	0.963318	0.423852	-0.128181	0.496302	0.836277	-0.277558	-0.169362	0.386732	0.240941	-0.0685548	0.283306	0.207705	0.837557	-0.0164579	0.276301	0.162195	-0.224065	-0.0408168	-0.415466	-0.306854	-0.34837	-0.166381	0.021861	-0.279521	0.0355266	0.211319	0.220419	0.393015	0.0396383	-0.00320212	-0.227608	0.0270112	0.544605	0.135325	-0.146181	-0.0821466	0.022906	0.266636	0.025606	-0.124604	-0.378697	0.140375
AGTPBP1	-0.0857493	0.204029	-0.00609481	0.540383	-0.125239	0.0741662	-0.145731	0.0265362	0.0408499	-0.145005	-0.23837	-0.172693	0.255812	0.053706	0.51052	-0.0577128	0.162123	0.0565224	-0.109261	0.20064	0.0286039	-0.0485257	-0.0462337	0.229025	-0.0363925	0.546967	0.0598487	0.0550451	0.0767619	-0.0299199	0.0534711	-0.138613	0.0559999	-0.230504	-0.214601	0.0317245	0.231684	0.467081	0.253259	-0.232971	-0.118255	0.0190634	0.0136535	0.218916	-0.0993262	0.059509	-0.33302	-0.240828	-0.381292
AGTR1	-0.162969	0.129065	0.21096	-0.00703135	-0.0486279	0.11456	-0.0101385	0.08949	0.26268	0.143681	0.361003	0.183066	-0.354408	-0.0292544	0.0125948	-0.0161064	-0.08034	0.163491	0.0088844	0.167533	0.141343	0.0110347	0.0336538	0.0483432	0.257265	0.00533795	0.0884651	-0.203636	-0.233144	-0.0821747	-0.0132257	-0.051123	0.0586245	-0.0168681	0.297469	0.0841054	-0.40019	-0.0125352	0.182565	0.110906	0.172837	-0.0909928	0.0561582	0.0673614	-0.0407146	-0.0133378	-0.0294323	0.0229896	-0.113794
AGTR2	0.0738083	0.0966693	-0.277102	-0.119016	0.0193688	-0.0350768	-0.035008	-0.0449409	0.130868	0.204756	0.261305	0.0341439	-0.030035	-0.0669262	-0.20092	0.205813	-0.0910523	0.0564253	-0.104081	0.0332031	-0.0945835	-0.0166517	-0.203958	0.0217208	0.148669	-0.148077	-0.0999076	-0.0261575	-0.113349	-0.0278187	-0.188211	0.0354769	0.048807	-0.0100175	-0.135699	0.0726924	-0.0506191	0.039564	0.0638896	-0.0179202	0.1042	-0.0652543	-0.0735756	0.269254	-0.0294605	0.33635	0.181667	-0.20674	-0.155172
AGTRAP	-0.169246	0.193831	-0.0459035	-0.244636	-0.0361715	-0.190073	-0.178659	-0.334554	-0.162927	-0.446133	-0.438826	-0.234921	-0.00824362	-0.1458	-0.0575522	-0.470586	0.0715846	-0.578327	-0.447459	-0.511279	-0.324964	-0.316077	-0.163208	0.590183	-0.424719	-0.137221	-0.449837	-0.541071	0.0652044	-0.48649	0.00737665	-0.314237	-0.370241	-0.272252	-0.255573	-0.208567	0.133008	-0.104894	-0.466941	-0.131445	-0.48711	0.121527	-0.250331	0.134322	0.12964	0.183112	-0.911411	-0.591717	-1.01132
AGXT	0.0316296	0.158371	0.122044	-0.138549	-0.00905362	-0.097198	0.00559507	0.162062	-0.147025	-0.124327	-0.0228015	0.151865	-0.397997	-0.0505913	0.157079	0.0624681	-0.181057	-0.0816778	0.0758626	-0.203636	-0.351044	-0.0945835	0.130868	0.0685333	0.255625	0.001852	0.0357844	-0.182483	-0.167037	-0.114567	-0.267908	0.00770586	0.164616	-0.0736918	-0.0454294	0.0461457	-0.232261	-0.0802805	-0.189009	0.241731	0.18899	0.0324551	0.0406169	0.0243098	0.0770847	-0.240945	-0.00675232	0.219414	-0.0632489
AGXT2	-0.000100289	0.0421071	0.329715	0.13334	0.351145	0.0132059	-0.0376528	0.633191	0.56316	0.49294	0.207705	0.458219	0.0631627	-0.397211	-0.0417856	0.0442079	-0.15461	0.848247	-0.0384756	0.0968684	0.112856	0.385505	-0.164996	-0.0681143	0.173149	-0.33511	-0.334349	-0.268744	-0.130082	-0.172057	-0.960393	-0.385523	0.702872	0.0320612	-0.144474	-0.0281936	-0.377764	-0.0425068	0.186056	0.813539	0.131047	0.117769	0.101066	0.269463	0.62072	0.263128	0.219785	-0.474887	-0.373787
AHCTF1	-0.101554	0.607324	0.263548	0.780775	-0.0372387	-0.00798462	0.206163	-0.110506	0.0561884	-0.225199	0.000467335	-0.143192	0.292354	0.046127	0.553244	-0.0111946	0.728179	-0.104081	-0.234867	0.131005	-0.0674737	0.254681	-0.0459035	0.236761	-0.0343574	0.714056	0.211064	0.367125	0.186286	0.263548	0.11328	-0.0275477	-0.396391	-0.138764	-0.334649	0.0600893	0.164783	0.660482	0.220974	-0.220682	-0.156675	0.11328	0.546967	0.408712	0.0424104	-0.179994	-0.279384	-0.00447044	-0.299627
AHCY	-0.182483	0.145937	-0.174865	-0.164577	-0.135989	-0.333117	0.241189	-0.21726	-0.339216	-0.149511	-0.138273	-0.286928	0.0673614	0.360047	-0.246103	-0.44081	0.175381	-0.122925	0.386232	0.108267	0.0779854	-0.200546	-0.0580265	0.33252	-0.0674992	-0.116813	0.0784041	0.1855	0.190416	0.0385655	0.366741	-0.25944	-0.101525	0.290433	-0.16583	-0.213444	0.185207	0.244416	0.0573783	-0.130109	-0.294701	0.13343	0.111849	0.184578	-0.129516	0.00775936	-0.11576	-0.0134605	-0.106476
AHCYL1	0.277581	-0.000802176	0.0209759	0.286911	0.286447	0.192802	0.171974	-0.108905	0.111318	-0.117408	0.179166	-0.100364	0.346601	0.290986	0.126488	-0.0695635	0.513928	0.0785889	0.3972	0.446713	0.363128	0.159137	-0.0824402	0.398418	-0.018254	0.424154	0.120861	0.199852	0.242246	0.261879	0.304629	0.103476	-0.133232	0.352379	0.085865	0.0290806	0.208423	0.362164	0.171451	0.000303062	-0.051123	0.366523	0.335953	0.337885	0.13334	0.504877	-0.050483	0.123793	0.103627
AHCYL2	0.518792	0.313483	0.00737665	-0.0711445	0.809518	0.28599	0.48318	0.4617	0.505589	0.160003	0.469558	-0.0134146	0.263688	-0.0238187	0.229337	-0.0441381	-0.189829	0.259309	0.232897	0.179068	0.621189	0.211419	-0.127435	0.132156	0.0635346	0.0782239	-0.123504	-0.152163	0.104448	0.11855	-0.140819	0.113717	-0.219982	0.32876	0.0900249	0.0120511	0.00314268	0.212867	-0.209733	0.209465	0.151372	0.440445	0.0618415	0.217156	0.325162	0.132585	0.0544032	-0.274696	-0.241528
AHDC1	0.307584	-0.210047	0.318427	-0.0426135	0.026805	0.412575	0.0147949	0.177294	0.1925	0.135769	-0.0226209	0.146361	0.0116957	-0.13167	0.158449	0.128188	-0.10185	-0.0315875	-0.0434619	-0.166742	-0.168723	0.262159	0.317892	-0.122668	0.21096	-0.0030922	0.0637468	-0.0671018	-0.134002	-0.123504	-0.0747365	-0.0147435	-0.105104	0.00035598	0.268331	0.121773	0.061959	-0.229327	-0.25082	0.086641	0.184938	0.0184081	-0.0937286	0.0549092	0.189554	-0.0789061	0.117123	-0.0771215	-0.102824
AHI1	0.143527	0.0462951	-0.0321494	-0.185694	0.0135615	0.127759	-0.152616	0.0269882	0.08736	-0.0641057	0.0982895	0.0517957	0.236482	0.0117514	0.0112794	-0.0612018	-0.000406471	-0.109261	-0.164462	-0.0798286	-0.140611	0.169211	-0.0792296	-0.0844039	0.0145798	-0.0802805	-0.0941123	0.094053	-0.0144992	0.172913	-0.0549641	0.253844	-0.0835865	-0.0238187	-0.0151167	-0.0853793	0.0224663	-0.123942	-0.0226209	-0.224502	0.0245035	0.0279903	-0.0106133	-0.117015	-0.0610755	-0.155552	0.231963	0.459618	0.0293514
AHNAK	0.221201	0.0641358	-0.109018	-0.326599	0.0323627	0.32999	0.0539461	-0.324361	0.0830392	-0.054679	-0.156336	0.167245	0.12742	0.112983	0.268699	0.0722596	-0.0302575	0.17226	0.244667	-0.0011979	0.130596	-0.0317801	-0.0646755	-0.00484506	0.0505643	0.427758	0.0365578	-0.0798907	-0.0282675	-0.163468	0.206061	-0.108905	-0.0193846	0.374214	-0.0881697	-0.240828	0.250373	0.312709	-0.103295	-0.200045	-0.0240086	0.0790711	0.107457	-0.0448424	0.1154	0.111004	-0.34745	-0.184623	-0.178785
AHNAK2	0.0128074	-0.154225	-0.316147	-0.213539	-0.238263	-0.0133137	-0.301601	-0.123195	0.0173488	0.386732	-0.344886	0.291893	-0.071194	-0.389709	-0.10307	0.389291	0.0540342	0.104335	-0.350299	-0.185736	-0.139893	-0.0261825	0.152236	0.103323	0.124885	-0.0671317	-0.403991	-0.0816168	-0.300856	-0.196415	-0.114474	0.53459	0.386125	0.035147	0.1597	0.351976	-0.152052	0.0467606	-0.0278693	0.00772753	-0.00775359	-0.0217814	-0.0417856	0.0860581	0.0655233	0.0783746	0.0231162	0.0934383	-0.166918
AHR	0.261426	1.00783	-0.335777	0.139141	-0.0438923	0.452296	0.337012	-0.223129	0.0178122	-0.0499585	0.226789	-0.0782431	0.233609	0.133384	0.00669587	-0.167895	0.123997	-0.0596901	0.301703	0.905571	0.960089	-0.247793	-0.207337	0.423555	-0.335327	-0.261611	-0.00788448	-0.523987	0.353054	-0.08294	0.248476	-0.364179	-0.255455	0.587482	-0.427482	-0.488143	0.228475	0.309768	0.587482	0.0254828	-0.525376	0.814558	0.201984	0.979779	0.2588	0.561362	-0.4175	-0.532372	0.500061
AHRR	0.151983	-0.251795	-0.114196	2.99398	-0.067614	-0.171975	0.0386201	0.356472	-0.147799	0.0322312	-0.0756554	-0.020514	-0.0293456	0.0662659	0.330288	-0.0618108	0.0635934	-0.0593991	-0.221143	-0.0380993	-0.381561	-0.365483	-0.113104	0.0318023	-0.13461	-0.224952	0.0822605	-0.431447	-0.271258	-0.0255322	-0.139406	-0.0221663	0.0871536	-0.0224585	-0.287514	0.021889	-0.124864	0.0385334	0.0642515	-0.0924265	-0.0944037	0.350336	-0.412045	-0.020816	0.00109965	-0.249756	-0.0589506	0.167951	0.12867
AHSA1	-0.0492255	-0.102946	-0.295822	-0.231968	0.00376761	0.0637769	0.0773589	-0.234533	-0.199312	-0.328456	-0.0293873	-0.146486	-0.126165	0.310627	-0.197974	-0.054809	0.0102822	-0.289132	0.330185	0.188793	0.285354	-0.147964	-0.119593	0.0405588	-0.178867	0.144784	0.0255785	0.217618	0.415335	0.350851	0.398961	-0.114437	-0.0675261	-0.0109318	-0.0574709	-0.323449	0.25146	0.23212	0.0201554	-0.194046	-0.215748	0.372354	0.12849	0.10203	-0.047844	0.28237	0.31941	0.473344	0.478495
AHSA2P	0.0803073	0.177604	0.238054	-0.0758157	-0.226451	0.0200269	0.180816	0.0322579	-0.0135663	-0.0638996	0.236991	-0.211572	0.790152	0.728893	-0.0681143	-0.223683	0.460597	-0.153119	0.143482	0.202807	0.14672	0.182609	-0.171271	-0.00866828	-0.131186	0.4617	0.344736	0.204621	0.122323	0.224908	0.399764	-0.273107	0.153875	-0.129894	-0.0244405	-0.0614694	0.348683	-0.118101	0.262744	-0.22123	-0.191801	0.0462951	0.24795	-0.0993262	-0.137652	-0.271387	-0.0321228	0.10329	-0.125607
AHSG	-0.198025	-0.0895742	-0.125473	-0.100046	0.0267072	-0.0403292	-0.149748	-0.0378786	0.0912588	0.103351	-0.111999	0.121043	-0.431642	-0.0547209	-0.0277122	0.280708	-0.0913524	0.0775648	-0.153771	-0.00892713	-0.0465717	-0.115226	0.446044	-0.149182	0.0967367	0.136391	-0.100783	-0.137824	-0.0792296	-0.19194	-0.164996	0.0943134	0.312967	0.171	-0.00053052	-0.0162353	0.0273574	0.117488	0.126352	0.0806096	0.046885	0.087864	-0.0776371	0.00339025	0.128459	-0.142161	0.422853	-0.218365	-0.0376528
AHSP	-1.11483	0.106242	-0.526665	-0.957207	-1.00297	-1.38056	-1.20023	-0.591717	-0.81832	1.9076	-1.39757	-0.843156	-1.31595	-1.39757	-0.239998	0.687798	-1.87743	1.09672	-1.21923	-0.33511	-0.370989	-0.853812	-0.040656	-0.336704	1.27884	0.522695	-0.346696	-0.462836	-1.73468	-0.573759	-0.318378	-0.133398	1.74928	0.902188	-0.442851	0.0398025	1.1589	1.21331	0.394493	-0.0535993	1.17656	-1.73468	-0.286844	-1.39757	-0.538694	-1.50878	-0.228626	0.48041	-0.161603
AICDA	-0.211178	-0.0950609	-0.192435	-0.0161621	-0.142812	0.0562441	-0.137508	-0.104868	0.417655	0.17582	0.149183	-0.0163665	0.0310914	-0.166257	-0.191199	-0.0463866	-0.197121	0.267276	-0.0641799	0.021012	-0.0267382	0.051772	-0.00657091	-0.215035	0.144537	-0.556517	-0.0138977	-0.371804	-0.151836	0.0822031	-0.171121	0.0987467	0.0567487	-0.234187	0.290214	0.225932	-0.162379	-0.00999238	-0.0722506	-0.0053818	0.0380234	-0.172911	0.127858	-0.124962	0.0650033	0.0219705	0.0432971	-0.263132	-0.128687
AIDA	-0.12331	-0.265287	-0.450272	-0.31695	-0.369236	-0.0715862	0.183555	-0.148589	-0.376261	0.744446	0.0795578	-0.295749	0.171327	0.280402	-0.377034	0.0461678	0.179795	0.356472	-0.0572808	-0.194947	0.118645	-0.23774	-0.389965	-0.520099	0.0370764	0.0828577	0.239094	0.225534	0.172737	0.437798	0.407629	-0.35839	0.305551	0.169964	-0.0966365	-0.454058	0.448926	0.387419	0.4408	-0.230999	-0.0171858	0.192897	0.164933	0.0202314	-0.392181	-0.275801	0.560331	0.284574	0.650965
AIF1	-0.122636	0.011904	-0.0398906	-0.430499	-0.344886	-0.56506	-0.400948	-0.659516	0.00987035	0.0680392	-0.146223	-0.224759	-0.0764405	-0.328295	0.11328	-0.0483011	0.0401558	-0.265287	-0.523659	-0.367671	-0.351539	-0.675361	-0.0449409	-0.377927	-0.119791	0.139588	0.292652	-0.213052	-0.0540951	-0.397576	0.378764	-0.375917	0.0765095	-0.0594497	-0.348047	-0.113858	0.244604	-0.0762261	0.0815193	-0.527341	-0.148909	-0.412045	-0.39917	-0.132957	-0.326599	0.0777105	-0.428202	-0.378815	-0.455175
AIF1L	-0.0203575	0.0937013	-0.38761	-0.00356365	0.105915	0.125658	0.0966693	0.398555	0.281986	0.18587	0.0742598	0.174621	-0.279769	-0.229418	-0.105321	0.036347	-0.281614	0.0881899	0.268572	0.289563	-0.0565363	0.151372	0.516769	-0.0769574	-0.0937541	0.101415	-0.163631	-0.0970825	-0.432202	0.0219705	-0.158029	-0.00370281	0.18198	0.0468612	-0.178302	-0.126631	-0.0557973	-0.0855884	-0.318877	0.0603846	0.172219	-0.153463	0.209041	0.127719	-0.00664763	0.300215	0.310172	-0.185736	-0.131602
AIFM1	0.393135	-0.0606343	-0.157411	-0.109109	0.0353654	-0.0626807	0.169889	-0.139964	-0.485969	-0.28872	0.0755938	-0.134378	0.269329	0.522966	-0.027987	-0.415926	0.0762417	-0.211325	0.673267	0.280159	0.602094	0.120037	-0.0551124	-0.021073	-0.356509	0.223712	0.103197	0.251209	0.402889	0.59507	0.347004	-0.282487	-0.172857	0.705177	-0.269191	-0.457619	0.302817	-0.0642905	0.0435943	-0.222592	-0.0909666	0.272488	0.361968	0.283021	-0.0865333	-0.265764	-0.0808834	-0.250992	0.08736
AIFM2	-0.166587	-0.0734285	-0.26515	0.349721	0.0227169	0.342567	0.246339	0.0657275	0.0653759	-0.0581477	0.250373	-0.0487403	0.00277709	0.165492	-0.00184676	-0.188295	-0.153954	0.544097	0.127858	0.00140174	0.000819388	0.0232593	0.0367428	0.0984272	0.246808	-0.166468	0.139729	-0.0220665	-0.100135	0.233609	-0.127058	-0.119532	0.204129	-0.224816	0.172219	0.269872	-0.149819	-0.00567875	-0.23723	-0.0278396	0.202946	0.118645	-0.038842	-0.451581	-0.14393	-0.194305	0.0602696	0.0293514	0.00297972
AIFM3	0.389931	0.0448069	0.48062	0.159096	0.389407	0.413694	-0.281861	0.443006	0.12445	0.00116993	0.264842	0.0427423	-0.34112	-0.174443	0.252212	-0.118961	0.282057	0.0139094	0.240695	-0.0608896	-0.0288843	-0.233395	-0.312892	0.105563	-0.443047	0.182061	0.152322	-0.220413	-0.141334	-0.265835	-0.355468	0.0783746	-0.0359727	0.0784964	-0.0634478	0.139027	0.00404796	-0.137265	-0.00188763	0.21096	0.119926	-0.308954	-0.231557	-0.228075	0.0177391	-0.323263	-0.0574416	-0.356305	-0.470791
AIG1	-0.0304876	-0.197931	0.0442436	-0.182653	0.00573409	-0.108218	0.0487463	-0.153163	-0.234236	-0.22265	-0.144206	-0.0538559	-0.149925	0.0336789	0.2315	-0.163468	0.274134	-0.250134	-0.0180023	-0.198321	-0.260739	-0.268744	-0.133605	-0.205981	-0.203224	-0.161481	0.0178935	-0.0350988	0.178297	-0.0207419	-0.0352279	0.0245035	-0.399614	-0.0904929	-0.454754	-0.164319	0.234788	-0.223639	0.00898321	-0.032612	-0.101681	0.182515	-0.28436	-0.200598	-0.192025	0.231571	-0.0156469	-0.0500244	0.292455
AIM2	-1.34529	0.122668	0.41241	-0.542167	-0.846386	-0.555461	-0.81832	-0.717843	-0.473169	-0.351765	-0.354855	-1.14372	-0.83054	-0.83054	-1.25236	-0.346369	0.0715189	-0.723691	-0.758246	-0.901656	-1.11483	-0.643554	-1.45757	-0.764485	-1.00297	-1.03943	-0.234533	-1.36467	-0.10987	0.00262238	-0.494271	-0.529949	-0.293137	-0.643039	-2.01538	-0.545926	-1.21923	-0.791578	-0.679744	0.283621	-1.27678	-1.10309	-0.729584	-1.14372	-1.11483	-1.4151	0.597106	-0.0738404	0.534867
AIMP1	0.138211	-0.195158	-0.41316	-0.159369	-0.150805	-0.0827498	0.0490526	-0.345395	-0.280316	0.430369	0.0387475	-0.463039	0.187209	0.460994	-0.296458	-0.123534	0.482124	-0.244537	0.0747768	-0.0170548	0.323489	-0.278705	-0.170656	-0.21726	-0.483308	0.297229	0.596653	0.356897	0.425118	0.401238	0.499859	-0.391635	-0.174403	-0.145514	-0.0435429	-0.546968	0.574413	0.0825443	0.226097	-0.368288	-0.498024	0.143412	0.100075	0.00437009	-0.29209	-0.403103	-0.138966	0.11328	0.18073
AIMP2	-0.170015	-0.23742	-0.219037	-0.249603	-0.0530545	-0.22435	-0.1411	-0.363993	-0.198742	-0.232261	-0.0533062	-0.142456	-0.00474189	0.124418	0.0245035	-0.122867	0.020579	0.010215	-0.170169	-0.117677	-0.0222614	-0.220962	-0.0550553	0.0628008	-0.234921	0.138432	0.0685333	0.0480115	0.0673875	0.143412	0.104644	0.00705309	-0.0369188	0.0891983	-0.1411	-0.023258	0.0789862	0.281908	0.0733231	-0.103994	-0.011525	0.157451	-0.083127	-0.116018	-0.0315666	0.0589707	-0.252035	-0.262818	-0.167437
AIP	-0.141988	-0.636861	-0.319327	-0.206112	0.107925	0.0881257	0.0168359	-0.303646	0.0156931	-0.261117	-0.219626	-0.080108	-0.18102	0.16017	-0.200087	-0.262313	0.204418	-0.286844	-0.0249843	-0.114597	-0.0555842	-0.205309	-0.0946388	0.169555	-0.112202	0.141819	0.160242	0.346368	0.398418	0.216064	0.175609	-0.049931	-0.0533062	-0.257896	0.00735223	0.0025014	0.195826	0.167081	0.00963154	-0.137115	-0.0857795	0.337012	0.145674	-0.0383724	-0.0360993	0.0483676	-0.350097	-0.23742	-0.156746
AIPL1	0.0215967	-0.0773552	-0.177066	-0.229739	-0.123284	-0.331293	-0.465606	-0.0311936	-0.221109	-0.0515502	-0.329732	0.0588843	-0.472275	-0.136753	0.290515	0.270899	-0.511902	0.0368026	-0.379726	-0.02405	-0.27373	-0.0183817	0.0197154	0.0809398	0.402641	0.00748092	0.0379193	0.00480051	-0.299627	-0.357629	0.0556768	0.0605167	0.74042	0.302472	-0.177294	0.682833	-0.153372	0.236991	0.0243859	0.194164	0.425924	-0.026714	-0.258948	0.0382351	0.197988	0.00557022	-0.0428809	0.00356601	0.0456164
AIRE	-0.644313	-0.356033	-0.123563	0.276083	-0.116566	-0.0606836	0.556778	-0.0316319	0.0401875	-0.363532	-1.01958	0.0803419	-0.386833	0.014627	-0.0482447	0.497544	-0.0499585	0.250257	-0.323985	-0.308954	0.172913	0.0127842	0.354759	-0.405313	0.187209	-0.136802	-0.132919	-0.166998	-0.0475273	0.0661161	-0.258305	-0.265687	0.720052	-0.301013	-0.0928648	0.263266	0.11401	-0.257074	-0.0360993	0.00898321	0.478243	0.0259642	0.129344	0.0554635	0.225272	0.240747	0.0500359	-0.174666	-0.0911349
AJAP1	0.130702	-0.0972325	-0.0713354	-0.169499	-0.0383724	-0.013512	-0.0622652	0.268382	0.107615	0.0179251	-0.0670544	0.208365	-0.147964	-0.122799	-0.0193044	0.215591	-0.147099	-0.0700303	0.0183607	-0.0603703	-0.121327	-0.0724468	0.0828577	0.0366065	0.154083	-0.154787	-0.128936	0.0830122	-0.0635514	-0.16828	0.0430655	0.219947	0.197684	0.0120025	-0.0787043	0.137432	-0.044965	-0.0477078	0.178297	0.216781	0.228304	-0.103235	0.045934	0.00948062	0.000382752	0.344011	-0.0278187	0.0373738	-0.103681
AJM1	-0.286424	-0.444322	0.342135	-0.127435	-0.0687096	-0.376261	-0.454425	0.0847708	-0.311996	0.401358	-0.771029	-0.119227	-0.370989	-0.196289	0.276629	1.07278	-0.56226	-0.192654	-0.327751	-0.306141	-0.31071	0.0040702	0.271268	-0.0280179	0.24916	0.211857	-0.014611	0.0124893	-0.448237	-0.258593	-0.395815	0.365509	0.684266	0.0822031	-0.3176	-0.0118259	-0.48074	0.598423	0.259436	0.236932	0.516769	-0.309427	-0.0657113	-0.0622147	0.26698	0.471589	0.0662371	0.0234886	-0.0661446
AJUBA	-0.03561	-0.0657923	0.0390328	-0.0903853	0.139027	0.27617	0.0722886	0.15297	-0.0161839	0.0908567	-0.0343805	0.0200795	0.0797304	0.0182062	-0.139333	0.0660564	-0.0324276	-0.0189639	0.134286	-0.127842	0.0260908	-0.0467903	-0.0203575	0.0322579	0.0378408	-0.0612513	0.00295956	-0.207337	0.0911109	0.0835903	-0.0551401	-0.0380993	0.0288991	-0.0350553	-0.130828	-0.0177901	0.05551	-0.157132	0.0178122	-0.187118	0.0136535	0.101483	0.0438399	-0.0725245	0.259053	-0.124261	0.0732623	-0.0413702	0.0445229
AK1	0.401751	-0.179255	1.23521	-0.206685	-0.230714	-0.272558	-0.444322	-0.356636	-0.155871	0.575612	-0.502984	0.18408	-0.0652828	-0.0520915	0.868062	0.812402	-0.218699	0.117362	-0.00345637	-0.513887	-0.228575	0.120136	-0.0496834	-0.0427167	0.568347	0.805341	0.109237	-0.040656	-0.363657	-0.0713113	-0.104022	0.343671	0.630534	-0.26647	0.342845	0.38168	0.117017	0.230337	0.292354	-0.291945	0.924609	-0.444892	-0.0860421	-0.300645	-0.329544	-0.469184	-0.0439212	0.434438	-0.0257542
AK2	-0.0956728	-0.201091	-0.295225	-0.370353	-0.0405837	-0.175311	-0.0633323	-0.0965081	-0.190191	-0.218051	-0.0834393	-0.18696	0.102194	0.08949	-0.226756	-0.260814	0.0665188	-0.180985	-0.0872999	-0.122668	-0.0820307	-0.281401	-0.303493	-0.245995	-0.269774	0.0241879	0.0236216	-0.0411111	0.184985	0.0548729	0.0982567	-0.155581	-0.0668109	-0.0382215	-0.0927573	-0.214747	-0.0128287	-0.00265447	-0.0440585	-0.171271	-0.165639	-0.000873067	-0.0615484	-0.107202	-0.0917524	0.00213109	-0.0574709	-0.00802836	0.177815
AK3	0.00187995	0.162854	-0.114113	-0.14393	-0.264747	0.105428	0.561945	-0.0421449	-0.0285621	0.103988	0.165814	-0.347345	0.318156	0.603135	-0.429211	-0.365133	0.163003	0.0967367	0.512537	0.51849	0.428057	0.0559157	-0.366977	-0.474684	-0.21052	-0.0551124	0.393452	0.599581	0.279546	0.366869	0.382191	-0.0911065	0.152063	-0.195615	0.028248	-0.394397	0.333077	0.42793	0.409956	-0.47037	-0.214388	0.205858	0.0482098	-0.0694811	-0.186995	-0.480287	0.66329	0.338994	0.521215
AK4	0.0228816	-0.0570684	-0.0508978	0.347302	0.177383	0.0908217	-0.199568	0.119819	0.215019	0.0759606	0.075427	0.0816436	0.139759	-0.118418	-0.00778251	-0.137433	0.0223615	-0.032474	0.0802244	-0.103745	-0.0160829	0.0129725	-0.054679	-0.0530279	-0.0390149	-0.309288	-0.0951463	-0.0622147	0.0182847	-0.0862299	0.0671872	8.62e-05	-0.135838	0.109613	-0.181192	0.334588	-0.601109	0.0332799	0.0395399	0.0716521	-0.0461313	-0.0537039	-0.2049	-0.248992	0.195	0.0530144	0.419729	0.109843	0.224956
AK4P1	0.246594	0.256382	0.338481	-0.0359487	-0.151836	0.352765	0.022066	0.488716	0.405987	-0.341526	0.118086	0.248353	0.00883507	-0.0278187	-0.027622	-0.258948	0.088909	-0.138966	0.377934	-0.338655	0.221263	0.166307	-0.148559	0.401618	-0.618177	-0.257144	0.0164011	-0.676237	-0.10304	-0.171165	0.248728	-0.33137	-0.406407	0.0451864	-0.156705	-0.651157	-0.471572	-0.258424	-0.651157	0.435038	-0.153238	-0.261206	-0.00289166	-0.175052	0.109973	0.0685001	1.0131	1.12884	0.783106
AK5	1.04116	-0.261363	0.227851	-0.0984167	-0.127058	0.137071	0.53259	0.0912588	0.00035598	0.272279	0.318663	-0.0318553	-0.00441774	0.900553	-0.598833	-0.180456	0.213288	-0.213343	0.546967	1.17656	1.07278	0.151331	0.0772035	-0.211936	0.209276	0.0026435	0.326882	1.14061	0.494417	1.07278	0.352676	0.48298	0.802956	-0.188892	-0.0179691	-0.10999	-0.153202	0.340165	0.329375	0.191268	0.306545	0.739625	0.582369	0.967365	-0.0770363	0.344736	-0.159837	0.0909482	-0.381424
AK6	-0.00680228	0.00687888	-0.0272349	-0.403103	-0.586062	-0.325606	-0.0911605	0.0706121	-0.167571	0.428859	-0.229634	-1.04575	-0.0570684	0.288156	0.00220854	-0.327406	0.0800801	-0.0763896	0.0573783	-0.0366032	0.257874	-0.398749	-0.0271911	-0.0314453	-0.288659	0.0833005	1.26703	0.267804	1.06965	0.173069	1.3096	-0.47979	-0.100294	-0.316304	-0.0536782	-0.153238	0.957684	0.0904608	0.799519	-0.584245	-0.764485	-0.145152	-0.423037	-0.801186	-0.571246	-1.34529	-0.573759	-0.0136162	0.155036
AK7	0.206111	0.0957902	0.0011192	0.00992123	0.0639165	0.107649	0.0456403	0.461431	0.361688	0.175895	0.367729	0.460994	-0.0207645	-0.146339	0.0449325	0.137679	-0.0128832	0.561034	0.123925	0.0231893	0.139324	0.1647	0.332813	-0.160575	-0.071223	-0.232765	-0.305093	-0.122799	-0.0848473	-0.121694	-0.314237	0.205369	0.35658	0.153398	0.284238	0.233326	-0.159035	-0.119412	-0.062564	0.124418	0.248408	-0.0578363	-0.0172752	0.089812	0.26319	0.21339	0.152702	-0.103295	-0.0723362
AK8	0.0687819	-0.00634868	0.0744317	0.0912855	0.312131	0.271854	-0.0728784	0.294785	0.512232	0.23879	-0.030035	0.378995	-0.0416323	-0.216025	-7.68e-05	0.194501	-0.128619	0.426687	-0.0202114	0.297534	-0.0507854	0.369366	-0.014551	-0.217305	-0.0514649	-0.114412	-0.395254	-0.0319624	-0.399491	0.0385334	-0.429211	0.273278	-0.0394459	0.234461	0.113386	0.224956	-0.278274	-0.776873	0.0694374	0.31781	0.162319	0.169139	-0.150805	-0.279162	0.357212	0.124742	-0.0109318	-0.174056	-0.125539
AK9	-0.0169145	0.189685	0.0558252	0.169211	-0.0590576	0.0742034	0.222385	0.304807	0.159374	0.27342	-0.020514	0.0538073	-0.0554217	0.219562	-0.0582995	0.0449025	0.144888	0.101996	0.0690285	0.200684	0.237862	0.350047	-0.162886	-0.0962696	-0.0240742	-0.0869926	0.371751	0.220912	0.280159	-0.0684197	0.157974	-0.066595	-0.0508978	-0.0371867	-0.0911065	0.146107	0.0832637	-0.0293663	-0.0721262	-0.125382	-0.210558	-0.00301716	0.164092	0.0719163	-0.0101165	-0.129763	-0.0316107	-0.306774	-0.0368134
AKAIN1	-0.048932	-0.230105	-0.233496	0.0394125	-0.134683	0.235113	-0.277682	0.242126	0.0872563	0.18215	-0.0545748	0.0886752	-0.155979	0.0559157	0.0679692	-0.0596901	-0.138112	0.0636872	-0.183454	-0.204772	-0.14597	-0.283971	0.0572878	0.395639	-0.0201621	-0.307677	-0.0897214	0.120611	0.135547	-0.429341	-0.101024	-0.452031	0.0977609	-0.180656	-0.0353064	-0.0288624	0.148189	-0.154443	0.229237	-0.189742	-0.0156469	-0.444128	-0.240167	0.132655	-0.380222	0.239628	-0.10258	-0.2589	-0.103411
AKAP1	0.0877134	-0.0813683	-0.233755	0.0750597	0.0984272	0.129306	0.367353	0.147948	0.0575807	-0.170695	0.1436	-0.0126464	0.245787	0.350658	-0.330222	-0.260082	0.199312	-0.0454837	0.242018	0.167207	0.180269	0.190064	-0.212569	-0.0175773	0.15049	0.0112273	0.230751	0.445707	0.383577	0.408712	0.24378	-0.00866828	0.0545472	-0.0359997	0.0709977	-0.395531	0.18578	0.324139	0.227454	0.00390067	-0.0718992	0.382427	0.173768	0.200974	0.0144758	0.0549622	0.0288782	0.00883507	0.144925
AKAP10	0.00463083	-0.272307	-0.147724	0.586416	-0.163712	0.300277	0.151624	-0.410278	-0.130475	-0.476747	0.110581	-0.213151	0.358902	0.102948	0.0475089	-0.350941	0.172952	-0.102122	-0.102495	-0.0988332	0.0618719	0.0364501	-0.190571	0.0863751	0.106312	0.0213946	0.268447	0.0742834	-0.0972325	-0.130865	0.110251	0.115939	-0.331174	-0.405815	-0.25781	-0.0403512	-0.0866443	0.290596	-0.349587	-0.0192305	-0.315004	0.168602	-0.00294414	0.277581	-0.0520398	0.1837	-0.172911	-0.0050895	0.0957216
AKAP11	-0.0564073	-0.152307	-0.218659	-0.275869	-0.258485	-0.10141	0.0245587	-0.00788448	-0.206147	-0.00556074	0.142361	-0.381969	0.179275	0.308949	-0.420592	-0.138799	-0.0385275	-0.242512	0.0549622	0.0760517	0.249647	-0.106297	-0.0955854	-0.00995006	-0.180456	0.429185	0.332813	0.354759	0.213288	0.674112	0.234517	0.00065492	0.117564	0.0952381	-0.139071	0.0384232	0.242588	0.125889	0.369626	-0.218506	0.00929798	0.145401	0.222498	0.0164563	0.0456164	0.00267234	0.123275	0.231736	0.131609
AKAP12	-0.388983	0.379228	0.123319	0.466855	-0.132858	-0.194046	-0.265422	-0.0927031	0.535088	0.244729	0.371633	0.0462682	0.0341989	-0.0788773	0.413399	-0.0633323	0.31159	-0.312237	-0.263549	-0.306543	-0.238522	0.0329367	0.0589109	1.23521	-0.125382	-0.198142	0.192677	0.617846	0.132871	0.159869	-0.320765	-0.250574	-0.217211	0.461884	-0.21248	0.0472153	-0.493818	-0.178785	-0.155581	0.679452	-0.130728	0.173907	-0.0220665	0.651561	-0.122668	-0.0293873	0.653825	0.775182	0.395248
AKAP13	0.0804411	0.354937	0.10786	0.482759	0.325456	0.15301	0.0550164	-0.281614	0.131496	-0.343138	0.0914012	-0.100328	0.123238	0.159545	0.149225	-0.127336	0.383975	0.0671576	0.0699837	0.130488	0.0098448	0.207904	-0.0329933	0.336834	-0.0331267	0.0917428	-0.0409495	0.139677	0.161585	0.21659	0.178828	0.138867	-0.214703	0.0470458	-0.149291	0.154044	0.107517	0.239686	-0.277682	0.549528	-0.149362	0.359096	0.317461	0.404471	0.00637592	0.0578722	-0.0923225	-0.168359	0.0179552
AKAP14	-0.0543608	0.00583591	-0.133367	-0.0279415	0.0161989	-0.0322434	-0.105409	0.122323	0.0902796	-0.0799573	0.107291	0.0371076	-0.179881	-0.00267986	-0.0692776	0.156341	-0.016896	-0.149182	0.0121214	-0.016631	-0.171868	-0.18182	0.171748	-0.0584584	-0.139001	-3.16e-05	0.0325848	-0.00884763	-0.0105506	-0.0667539	-0.0772967	0.0781616	-0.0169797	0.0122074	0.082601	-0.0538559	-0.148559	-0.0240086	-0.0530545	0.0852998	-0.0241256	-0.0348388	-0.0625135	-0.0281936	0.00810491	0.0745687	0.176785	-0.0198729	-0.114567
AKAP17A	-0.0535993	-0.046765	-0.0350988	0.142394	0.0335642	0.0167316	0.00838345	-0.0689957	0.0145337	-0.16954	-0.204086	-0.0389645	0.166307	0.213806	0.0137134	-0.193365	0.148037	-0.0956728	0.122044	-0.15886	-0.11243	0.0830122	0.00164772	0.0361409	0.0496031	0.333656	0.181282	0.162229	0.125204	0.00750856	0.0169369	0.0864006	-0.170332	-0.162305	-0.0859551	-0.211572	0.0249906	0.031917	0.0357559	-0.134029	-0.0125624	0.173208	0.0879214	0.187108	-0.15406	0.0140699	-0.0360227	0.238723	0.0857471
AKAP2	-0.16772	0.232169	-0.103745	-0.202376	0.71045	0.574838	0.24916	0.0440231	-0.14475	-0.119171	-0.0848768	-0.491416	-0.599821	0.276369	-0.166844	-0.279769	0.121283	-0.293214	0.204169	0.109676	0.205615	0.538209	-0.191451	-0.317453	-0.249233	-0.293064	0.182421	-0.629154	0.33119	0.428552	0.11577	-0.271982	-0.0258005	0.165814	0.17773	-0.473816	-0.0552725	-0.0941123	-0.161035	-0.198371	-0.157701	0.0687231	0.0806922	-0.0124341	-0.281326	-0.172952	0.675369	-0.0618428	0.928149
AKAP3	-0.00422963	0.208104	-0.165755	0.0163777	0.0176718	0.186727	0.283375	-0.0348982	0.0575174	-0.0212236	-0.137901	0.135019	-0.00876753	-0.139209	-0.0762812	-0.172097	-0.2972	0.101358	0.0987143	-0.592169	-0.16454	0.0260134	-0.046848	-0.15024	0.171327	-0.20634	-0.291481	-0.6033	-0.0661766	-0.219573	-0.641652	-0.414747	0.0927234	0.063012	0.239736	0.0373458	-0.730663	0.31279	-0.216325	0.0044979	0.00516914	-0.347746	0.0536781	-0.134289	0.290054	0.0586479	0.322962	0.0122323	-0.0603334
AKAP4	-0.175419	-0.220126	-0.162969	-0.140853	-0.0413439	0.0473542	-0.217652	-0.14706	-0.110812	-0.0753078	-0.301668	-0.0736918	-0.235295	-0.218894	0.762273	0.16783	-0.392327	-0.0623379	-0.363306	0.121911	0.22584	0.0564253	-0.0632489	0.108064	0.280094	0.500989	-0.024586	-0.0600696	-0.255517	-0.021474	-0.0411645	0.748925	0.123721	-0.0406071	0.0513977	0.21366	0.135019	0.377934	-0.0658697	0.0406949	0.269463	-0.156889	0.012384	-0.225112	-0.0448076	0.118335	-0.0611509	0.0583751	-0.000873067
AKAP5	0.0370764	0.0626335	-0.244215	0.0293784	-0.136272	-0.292849	-0.205179	-0.193876	-0.02405	-0.0958046	-0.165403	0.0386461	-0.0265654	-0.138438	-0.228124	0.416574	-0.14867	-0.0133378	-0.131704	-0.094262	0.0176388	-0.250452	-0.17975	0.0271912	-0.0277538	0.0193398	-0.015703	-0.0243688	-0.0128832	-0.0989004	-0.0793789	0.0506214	0.0565836	-0.0912112	0.0262028	-0.0820559	0.0977609	0.12964	-0.154753	-0.097992	0.210429	-0.0292012	-0.369236	0.049273	-0.107499	0.152673	0.425924	0.480877	0.213806
AKAP6	-0.0537039	0.0938091	0.275455	-0.0221359	0.0515404	-0.050046	-0.0966021	0.0662371	0.0604854	-0.0996148	-0.228124	0.0337591	-0.108123	-0.218051	0.08736	-0.0399726	-0.133115	0.696609	-0.187414	-0.190879	-0.0517544	0.314404	0.659742	0.407758	0.330842	0.203628	-0.00372753	-0.292361	-0.169978	-0.0927866	0.100737	0.256635	-0.205834	-0.117471	-0.024807	-0.096428	-0.0639858	0.0747768	-0.170059	0.393015	0.00526269	-0.0641057	-0.373341	0.175895	0.152565	-0.109109	0.0832637	0.128711	0.0818676
AKAP7	-0.00191483	-0.391366	0.115101	-0.15969	-0.443815	-0.339482	-0.265223	0.118442	-0.158407	0.29924	0.11237	-0.126792	0.0202597	-0.0300144	-0.250697	-0.000703817	-0.0467064	0.0334201	-0.119593	0.215525	0.538209	-0.2267	0.0306836	-0.310138	-0.0842883	-0.114905	0.215109	0.0281783	0.0690862	0.098927	0.106454	-0.274959	0.149723	0.00536148	-0.112912	-0.141302	0.0548173	-0.00720913	0.295321	-0.170444	-0.0762812	-0.00213754	-0.0557679	-0.0903251	0.0922937	0.00536148	0.340284	0.109943	0.125621
AKAP8	0.119473	0.0311509	-0.0270715	0.172561	-0.0432583	0.0656071	0.0558252	-0.202297	-0.0908305	-0.124426	0.0439946	-0.145623	0.477117	0.215318	0.0202314	-0.132381	0.232729	-0.0639564	0.206727	-0.0879264	0.123179	-0.0862886	-0.107751	0.0317496	-0.0515502	0.261305	0.213494	0.301367	0.291355	0.145994	0.29029	-0.0043961	-0.154645	0.12727	0.0996272	0.121283	0.254046	0.248353	0.0869518	-0.0123586	-0.0946092	0.437021	0.223829	0.256487	-0.161446	-0.0120792	-0.107254	-0.063129	0.159096
AKAP8L	-0.280927	-0.126165	-0.0263668	0.0578438	-0.0445106	-0.0459035	-0.109756	-0.178735	-0.0817936	-0.088764	-0.0738404	0.0190634	-0.125841	0.0111524	0.0455024	0.201984	0.0472153	-0.016412	-0.106263	-0.159193	-0.27517	-0.0410322	0.149149	0.000211397	0.143158	-0.00895142	-0.00474189	0.0576591	-0.0601225	-0.216809	0.0219134	0.0374005	0.0196621	-0.278565	-0.0706715	-0.128181	-0.0490726	0.246096	-0.326878	0.0615233	-0.079004	-0.179716	-0.148559	-0.228124	-0.195894	-0.250395	0.0996272	0.256707	0.106965
AKAP9	-0.215533	0.0443334	-0.61655	0.224348	0.144165	0.243596	-0.025183	-0.346807	0.0332515	-0.245945	-0.106074	-0.0242705	0.308183	0.258338	-0.219481	-0.138239	0.229025	0.0830122	-0.439462	0.0772287	0.104397	-0.120254	-0.0261356	0.00390067	-0.42233	0.064457	0.106794	0.212431	0.062736	0.109097	0.262552	-0.0587296	0.00725482	0.0421634	-0.280517	0.0195834	0.293684	0.286571	-0.409154	-0.107561	-0.25465	-0.0937541	-0.159913	-0.164959	0.0666471	0.0409045	0.218696	0.142813	0.149261
AKIP1	0.0436171	-0.190849	0.117977	-0.379221	0.289772	-0.0598808	0.0453653	-0.353655	-0.220962	-0.0808834	0.0374814	0.0364501	-0.0297708	0.0668314	0.134175	-0.191729	-0.0191726	0.0546053	0.201893	0.179661	0.000199576	-0.287871	-0.167469	-0.039069	-0.318378	-0.0583588	-0.143461	0.0669608	0.100978	-0.229589	0.0505643	-0.391499	-0.283837	-0.00320212	-0.0229891	-0.542521	-0.113376	-0.23264	-0.314079	0.0822301	-0.166033	-0.0204392	-0.00188763	-0.27114	-0.0258279	0.337012	0.265474	0.236528	0.0824447
AKIRIN1	-0.0617848	0.33252	0.0718294	-0.168469	0.151583	0.106242	0.11443	-0.112356	0.0853578	-0.0592967	0.0942492	-0.291142	0.227287	0.232069	0.336045	-0.0497078	0.180345	-0.0368661	-0.0956152	0.139027	0.225735	-0.0335258	-0.193239	0.342567	-0.181151	0.113917	-0.0937286	0.400172	0.37467	0.367	0.199015	0.315153	0.0428713	-0.0546256	-0.0392276	0.049103	0.0919037	0.470196	0.00976657	-0.0606089	-0.0200638	0.105392	0.674112	0.484751	-0.552922	0.247786	0.192012	0.222498	0.35298
AKIRIN2	-0.306721	0.423852	0.28397	0.11051	-0.0798572	0.0320303	-0.0870764	-0.163947	-0.329544	-0.387969	0.0756603	-0.102736	-0.0180023	-0.123223	0.127093	-0.121661	0.0402694	-0.198371	-0.0542891	0.295837	-0.00887455	-0.155373	-0.155056	0.275695	0.0135615	0.365397	-0.302065	-0.00294414	0.13004	0.0053083	-0.0730168	-0.0155279	-0.444708	-0.0928957	-0.234592	0.0174258	-0.00384704	0.207904	-0.0604004	0.222017	-0.114771	-0.171045	0.149523	-0.0579469	0.0109382	0.210478	0.128858	-0.0997625	0.175473
AKNA	0.0419711	-0.183928	0.0465466	0.259857	-0.0506191	0.053785	-0.0200638	-0.176604	0.0786808	-0.23747	0.0162789	-0.0569606	0.04301	0.0712937	0.0243098	-0.170779	0.0489118	-0.224551	0.0782834	0.0927636	-0.257953	0.0495157	0.0994223	0.120759	-0.153091	-0.0455121	-0.0100401	0.0832306	0.153757	-0.0139247	-0.151107	0.0126418	-0.342214	0.0250165	-0.0258005	-0.115113	-0.037585	-0.075254	-0.387235	-0.0396163	-0.169896	0.259684	-0.136027	0.120971	-0.0690986	-0.216025	-0.200598	-0.114936	-0.0711129
AKNAD1	-0.0275282	-0.0741837	-0.207337	0.125447	0.0108681	0.0522909	0.0010502	0.039218	0.0190902	-0.12118	0.0121214	0.134666	-0.0205426	-0.052232	-0.121362	0.157171	0.141117	-0.0731748	-0.0143276	0.0906953	-0.149583	-0.0707933	0.330076	-0.195029	0.0141146	0.0269882	-0.0839226	-0.0634752	0.0145798	0.0213413	-0.00798462	0.128375	0.0643489	-0.0487403	0.183333	-0.0106933	-0.0826866	0.0295684	0.0132789	0.179844	0.243406	0.0450391	-0.153238	0.147533	0.230223	0.206816	0.0036362	-0.0489917	-0.0491493
AKR1A1	0.0455304	-0.0789061	-0.384734	-0.234655	-0.0776055	-0.282596	0.0575513	-0.381292	-0.434091	0.00615475	-0.197077	-0.139632	-0.0627295	0.0740814	-0.156536	-0.675361	0.185441	-0.209142	0.1359	0.0487463	-0.129858	-0.432693	-0.208475	0.0791686	-0.585071	-0.138799	0.12188	-0.0556596	0.250187	0.0125392	0.228304	-0.327309	-0.23476	-0.187118	-0.19747	-0.527341	0.151702	-0.050201	-0.0139449	-0.333329	-0.35685	0.0670203	-0.303573	0.0197434	0.132251	-0.103121	-0.368153	-0.310067	-0.181733
AKR1B1	0.150155	-0.393303	-0.34745	-0.0015116	0.100706	0.103169	0.271435	-0.0593991	-0.194225	-0.345296	-0.00832394	-0.22338	0.190635	0.487245	0.0143787	-0.713496	0.200104	-0.219037	0.356897	0.0294377	0.00945405	-0.221957	-0.0832638	0.352676	-0.172146	0.233661	0.541474	0.429828	0.837557	0.324966	0.570509	-0.33482	0.013156	0.0157727	0.34772	-0.241462	0.429687	0.231736	0.221263	-0.27982	-0.283767	0.741329	0.179661	0.305665	-0.130475	-0.114905	-0.103235	0.181888	0.338481
AKR1B10	-0.0986999	-0.036478	-0.0272585	-0.00829817	0.185441	-0.16828	0.154906	0.260534	-0.0701129	-0.228075	0.383975	0.385276	-0.433719	0.113747	0.371287	0.131418	-0.123758	-0.146657	0.41354	0.0834023	-0.212569	0.0729022	0.470196	-0.541846	0.114776	-0.23837	-0.154028	0.425924	-0.413914	0.00784293	0.00439734	0.177771	-0.167861	0.408274	0.186972	0.19541	0.1925	-0.301958	-0.107866	-0.181569	0.111849	0.104509	-0.329442	-0.102032	0.0812902	-0.117346	-0.0404021	-0.0201621	0.00518599
AKR1C1	-0.0909928	0.0167844	0.0184332	-0.082855	0.0621321	-0.088849	-0.0877102	0.0770847	-0.00760918	0.0493557	-0.0974977	0.039564	-0.101204	-0.0229627	0.114462	0.0493003	-0.121767	-0.00271178	-0.0118939	-0.106074	0.0346078	0.0896437	0.0549622	-0.1118	0.232897	-0.0930521	-0.101131	-0.105471	-0.0134821	-0.0915462	-0.0982074	-0.027622	0.0345817	0.157124	0.150357	0.0529862	-0.0631519	-0.223323	0.0940839	0.0348328	0.137195	-0.117346	-0.0268512	0.0735372	-0.039713	0.116186	0.131531	0.0200269	-0.0646259
AKR1C2	0.0591592	0.0928835	-0.0771772	-0.507994	-0.378579	-0.0427167	-0.597384	-0.271064	-0.0420479	-0.00430619	-0.148005	-0.200402	0.226729	0.100843	-0.0873667	0.165858	-0.0911605	-0.121035	0.141543	-0.233496	0.212949	-0.409999	-0.267908	-0.238589	0.161375	0.151502	-0.320295	-0.234135	0.0676129	-0.217159	-0.167316	-0.271258	0.0954369	-0.126896	-0.0988678	-0.0588102	-0.0670769	-0.267271	0.0531344	-0.127601	0.0133319	-0.512183	-0.453636	0.267276	0.152755	0.0606021	0.162062	0.343671	-0.0151395
AKR1C3	1.9076	0.70224	-0.513015	-1.4151	-1.53671	-0.411706	-1.13521	-0.806481	-0.957207	0.00035598	0.00127146	-0.326599	1.55809	0.928149	0.7185	0.0311177	0.163564	-0.88679	0.833633	1.47671	2.07672	-0.926476	-0.493302	-0.781268	0.403473	1.68319	1.00526	0.717874	0.407992	-0.195494	1.22955	-1.48814	-0.430881	-0.069074	-0.27027	-0.846386	0.404471	-1.12796	1.29702	-1.0616	-0.421865	-0.29676	0.147684	1.29172	0.772576	0.635854	-0.278833	0.404031	0.450403
AKR1C4	-0.287736	0.125958	-0.0579959	0.00416667	-0.283579	0.000280907	0.0241879	-0.183928	0.136692	0.0737813	0.237991	0.296277	-0.077759	-0.181096	-0.0951762	-0.135604	-0.0732807	0.00245092	-0.211892	-0.0298667	-0.208834	-0.0712536	1.02167	-0.0321726	0.0801649	-0.0410581	0.0946391	-0.0506463	0.0104913	0.239212	0.137568	-0.167355	-0.0281177	-0.220072	-0.143574	-0.0397618	-0.0937286	-0.434934	-0.223483	0.0986549	-0.00325269	-0.0718447	0.192012	-0.185135	-0.220796	-0.26888	-0.213917	0.0665785	0.10103
AKR1C6P	-0.145074	0.214909	-0.278833	0.241189	0.247497	0.099519	0.333367	-0.164883	0.192458	-0.0675261	0.264572	0.279831	0.268871	-0.247848	0.225122	0.131123	0.128858	-0.109725	-0.226979	-0.174443	0.404572	-0.188673	0.0593929	-0.129383	-0.118523	-0.252347	-0.137338	-0.176604	0.0505643	0.0637193	-0.0593991	0.118682	0.0268842	0.101451	-0.00105568	0.0197154	-0.0710201	-0.057523	-0.0503609	0.419528	-0.0694811	0.015919	0.102724	0.111069	0.383687	0.28397	0.00730341	0.106312	-0.0629067
AKR1D1	0.476072	-0.0735756	-0.0728447	0.196908	0.306345	-0.180985	-0.204507	-0.0288843	-0.132018	0.433758	-0.0253775	0.144201	-0.13248	-0.0640146	-0.0534409	0.0237316	-0.0315875	-0.0805511	0.156617	0.0137654	-0.166182	-0.200266	-0.0531414	-0.126392	0.124305	-0.0270715	-0.217958	-0.093807	0.0392748	-0.202336	-0.0681422	0.110728	0.288739	-0.00611659	-0.283698	-0.0547426	-0.122609	0.317223	0.0500944	-0.113703	0.317372	0.0975329	-0.0188313	0.402485	0.0206596	0.0610808	0.000382752	-0.00829817	-0.108318
AKR1E2	-0.11976	-0.225734	-0.0710504	0.092188	0.247841	-0.304632	-0.235988	-0.0171858	-0.252464	-0.0818326	-0.0260555	0.240872	-0.316676	-0.176113	-0.0166517	0.630011	-0.599821	0.192949	-0.229634	-0.217492	0.0352316	0.0760517	0.318823	-0.0207645	0.0147412	0.0846056	-0.289069	-0.0465432	-0.33302	0.0571539	-0.176517	0.179844	0.1154	0.107489	0.569394	0.33635	-0.0492867	-0.280316	0.0414908	0.338178	0.0815193	-0.146374	-0.137047	0.106621	0.060241	-0.158896	-0.113069	0.136585	-0.104114
AKR7A2	0.149491	-0.188721	-0.00522744	-0.129484	0.0467606	0.0636206	0.344736	-0.320765	-0.267526	-0.384992	-0.170581	-0.355347	0.378052	0.433436	-0.104836	-0.651157	0.0826599	0.046885	0.365397	0.201732	0.10486	-0.0679517	-0.0927031	0.0460418	-0.103269	0.203155	0.174662	0.262614	0.723321	0.110581	0.332156	-0.110131	-0.306854	-0.175588	-0.158676	-0.485717	0.0406458	0.0344653	0.059509	-0.255271	-0.230305	0.421073	0.146149	0.00737665	0.119029	0.196414	-0.474684	-0.26237	-0.340192
AKR7A3	-0.0522534	-0.0787663	0.140907	0.112057	0.00356601	0.155696	-0.0319624	0.13833	-0.2174	0.0256315	0.125414	-0.0596901	0.103449	0.0123129	0.0240187	0.113818	-0.0783268	-0.00283659	0.00233511	-3.74e-06	-0.0780043	0.0682809	0.171121	-0.114506	0.172737	-0.297512	-0.0737204	-0.253748	0.0417263	-0.140237	-0.227442	0.00536148	0.0300367	0.0922937	0.254332	-0.0504563	-0.133929	0.0301916	0.428254	-0.141263	0.0436468	0.361867	0.0342465	-0.0107854	0.0758626	0.27867	-0.223129	0.130519	-0.380343
AKT1	0.472403	-0.0730433	-0.433068	0.0917996	0.19552	0.416281	0.117092	0.0450676	0.177503	-0.158098	0.10509	0.0694093	0.49602	0.0248648	0.156912	-0.0915462	0.217055	0.0463511	0.311275	0.323057	0.302986	-0.205888	0.262878	0.442879	0.140493	0.250851	0.172788	-0.0148647	0.187824	0.0524708	0.0530429	0.457468	-0.0809117	-0.0230598	-0.0235411	0.22971	-0.179295	-0.0191726	-0.188553	0.150564	-0.257208	0.471589	0.320943	-0.00447044	-0.198604	0.250141	-0.225833	-0.324087	-0.09902
AKT1S1	-0.104616	0.404327	-0.1118	-0.454259	0.29833	0.106114	-0.141008	0.0846056	-0.118779	0.205278	-0.162848	0.0911414	-0.119984	-0.105661	0.65333	0.779703	-0.37958	0.545967	0.165637	0.257825	0.0883475	0.278736	0.110344	0.0118568	0.26624	0.0350828	-0.516819	0.148711	0.00507396	-0.150567	-0.0525489	0.300496	0.354123	0.0195056	-0.0739564	-0.0759027	0.265159	0.204169	0.197988	0.0397493	0.522695	-0.298367	-0.0490726	-0.180615	-0.235931	0.286066	-0.430182	-0.366085	0.00885745
AKT2	-0.0165049	-0.143789	-0.263132	-0.140044	0.0482098	0.138401	-0.155795	-0.00824362	-0.0604445	-0.114711	-0.183094	-0.0823528	-0.0153084	0.144888	0.139141	0.0509777	-0.0427657	0.0327508	-0.0565897	-0.122799	-0.0725758	-0.083707	0.00843399	0.060695	-0.0512283	-0.0859835	0.00297972	0.1359	-0.00420534	-0.153337	0.0112273	-0.0408168	0.0502824	-0.116533	0.0268588	0.0649239	-0.0264679	-0.0169332	0.0671872	0.056551	-0.0433804	-0.050758	-0.0858344	0.0106949	-0.0604218	0.0662371	0.117977	0.105838	0.148369
AKT3	0.291057	-0.111825	0.0554011	0.243973	-0.00561292	0.208843	0.335189	-0.0623379	0.239628	-0.140819	0.26319	0.0109639	0.0483432	0.227915	-0.0695063	-0.244317	0.224612	0.0677147	0.145596	0.132364	0.111598	0.0715189	-0.036074	-0.141044	-0.157169	0.00107003	0.251277	0.174007	0.356897	0.200728	0.155285	-0.114059	-0.208104	-0.101768	-0.107075	-0.279313	0.134666	0.0924272	-0.0456021	-0.200825	-0.0586779	0.109432	0.0713851	-0.0129994	-0.112073	-0.198647	0.571147	0.603882	0.47539
AKTIP	0.162677	0.237792	0.380458	0.444216	0.00447179	0.136151	0.0530429	-0.143057	0.0767046	0.19774	0.273984	-0.167646	0.243729	0.46623	-0.41375	-0.208325	-0.0352279	-0.0728784	0.066175	0.225024	0.267454	0.152018	-0.370136	0.0124627	-0.474449	0.251158	0.223146	0.355692	0.162268	0.159506	0.111318	0.0441033	-0.13025	-0.285549	0.0887088	-0.271786	0.317142	0.126455	-0.126474	-0.0345026	-0.0755109	0.35878	0.745371	0.401618	-0.0877929	-0.274571	-0.157309	-0.0994554	-0.0147751
ALAD	-0.165142	-0.00131429	0.196414	-0.290228	-0.015452	0.0489398	0.0379461	-0.101165	-0.268941	0.0216692	-0.150644	-0.0903251	0.181888	0.0213646	0.243137	0.383687	0.0300084	0.0958217	0.144085	0.141739	0.0745977	-0.192836	-0.126446	-0.0510222	0.26203	0.0466803	-0.0174454	0.0781947	0.117807	0.298542	0.144745	0.275044	0.0637193	0.455344	-0.0624617	-0.0499082	0.0846056	0.27617	-0.0704905	0.168849	0.208104	-0.0439212	0.039564	-0.0125909	0.205112	-0.0995456	-0.541071	-0.141369	-0.382959
ALAS1	-0.103471	0.416453	-0.0170548	0.122539	0.436169	0.432721	0.456216	-0.00829817	0.174924	-0.400333	-0.0813955	-0.411398	0.338781	0.212431	0.116226	-0.43651	0.171	-0.316676	0.21542	0.300412	0.0092143	0.0399447	-0.0743451	0.765253	-0.0616782	0.400853	-0.13057	0.237395	0.373178	0.456867	0.236815	0.386732	-0.437435	0.136585	-0.301335	-0.492277	0.125991	0.374214	0.0237019	0.192802	-0.336178	0.110312	0.0604501	0.176785	0.427372	0.403324	-0.504029	-0.0840787	-0.440975
ALAS2	-0.371107	0.197255	0.059361	0.425607	-0.240503	-0.806481	-0.21404	0.515028	-0.35817	1.17221	-0.40241	-0.0516758	-1.02473	-0.314143	-0.245225	0.410982	-0.113294	0.727347	-0.932681	-0.564231	-0.785403	0.0173759	0.3753	0.0270112	0.496542	-0.143461	0.0504038	-0.237952	-0.36492	-0.00936112	-0.301746	0.329041	1.1451	-0.0549891	-0.168965	-0.272117	0.128459	0.396537	0.120647	0.104397	0.513928	-1.03004	-0.255	-0.536736	-0.0372387	-0.653264	-0.350633	-0.174942	0.167207
ALB	-0.00553842	0.0945427	0.172737	-0.060186	0.0645211	0.109055	-0.211572	0.204307	-0.0427657	0.0121665	-0.0986644	0.0901495	-0.172413	-0.0982074	0.0648949	0.0776256	-0.0129047	0.0867333	0.133985	0.0599408	-0.0649964	0.00381992	0.222017	-0.0903251	0.0702015	-0.0730945	-0.101739	-0.101955	-0.00358746	0.0912588	-0.0478152	0.138784	-0.0468804	0.032808	0.216993	-0.0375586	-0.000582401	0.0105479	-0.0555842	-0.137144	0.00788834	-0.181971	-0.216902	0.0768889	0.0273277	0.170578	-0.0555842	-0.0554715	0.0447303
ALCAM	-0.321783	-0.171586	-0.142379	0.110284	0.162822	0.863746	-0.328965	-0.0448424	0.510794	0.110407	0.221138	-0.0550202	0.34045	0.075535	0.0641904	-0.0366545	0.286066	-0.144244	-0.145415	-0.233818	-0.0856114	0.260396	-0.218939	-0.184735	0.158143	0.439709	0.289708	-0.0427433	0.218599	0.290926	0.0922615	0.149916	-0.0160311	-0.299627	-0.254256	0.5871	0.224813	-0.0227188	0.43517	-0.00372753	-0.493818	-0.471015	-0.0184993	0.493674	-0.36525	-0.00215927	-0.303053	-0.140205	0.191969
ALDH16A1	-0.0148431	-0.666386	-0.591717	-0.213299	-0.0474385	-0.0777892	0.0044979	-0.298659	-0.344005	0.129344	-0.112234	0.0572583	-0.0425337	0.261619	-0.0309168	-0.129986	0.279142	0.104894	0.0574058	0.0139367	0.0875003	-0.391499	0.212384	0.227514	0.220378	0.0543794	0.0690564	0.0179251	0.144784	0.0990662	0.309768	0.00541282	-0.273974	-0.264299	0.0578438	0.173298	0.217546	0.0635045	-0.0994798	0.166349	0.0548173	0.364308	0.40205	-0.126327	-0.149853	0.499859	-0.421552	0.0194791	-0.0683983
ALDH18A1	0.467487	-0.0230382	0.0168359	0.252089	0.112983	0.125204	0.700801	0.121809	0.148669	-0.0986644	0.195648	-0.0745868	0.25557	0.555811	-0.0159814	-0.165799	0.209917	0.430872	0.31781	0.200067	0.215257	0.56682	0.076296	-0.0744723	-0.0543902	0.0751845	0.333284	0.66104	0.467293	0.325278	0.432364	0.0671872	-0.0498062	-0.0776371	0.07715	0.0165091	0.281204	0.344328	0.0556146	0.153982	-0.0784973	0.393967	0.218486	0.227232	0.0270858	-0.0181758	-0.0475551	0.105696	0.24045
ALDH1A1	0.0501525	1.68319	1.01008	0.759834	-0.26907	-0.218097	-0.525134	-0.0249607	-0.413303	-0.0624305	-0.545506	-0.127058	0.0494397	-0.299495	0.632093	-0.317279	0.895474	-0.451177	0.226837	0.13883	0.0563251	0.164835	-0.649585	0.753301	-0.944761	0.89895	-0.316676	0.56682	0.592268	-0.651764	0.895474	0.191216	-0.187819	1.52748	-0.104738	-0.344222	0.614884	0.361509	0.310409	0.51849	-0.480025	0.542968	0.512537	3.272	1.9076	0.851205	-0.606214	-0.644313	-0.593117
ALDH1A2	-0.0475551	-0.0200638	-0.21168	-0.0488868	-0.0415036	0.0195347	-0.168054	-0.0738991	0.219723	0.107395	0.248191	0.0521193	-0.0458711	-0.114385	-0.0494224	0.246148	-0.35273	0.20733	-0.229418	-0.177497	-0.271598	0.042592	-0.0171636	-0.198825	0.160678	-0.222802	-0.0847889	0.143527	-0.130986	-0.198604	-0.0392276	-0.00461475	-0.0596029	0.0279079	0.637951	0.0470701	-0.129125	-0.18404	-0.182849	-0.151913	0.0655233	0.0772948	0.0668959	-0.120017	-0.145999	0.0924991	0.166232	-0.109353	0.173025
ALDH1A3	0.193621	-0.223953	0.0286039	0.209976	0.0970004	-0.0340839	-0.0709702	0.0754494	0.056551	0.0589109	0.0072307	0.150961	-0.16859	-0.0695635	-0.0245615	0.0813124	0.00640338	0.264437	0.10203	-0.214131	0.0563455	0.337577	0.0404431	0.0181594	0.491618	-0.0660923	-0.157343	-0.262434	-0.208197	0.048541	-0.0720394	0.162968	0.156999	0.223712	-0.145376	0.148527	0.233378	-0.332108	0.028767	0.0247602	0.483844	0.054577	-0.173224	-0.332554	0.325278	0.05776	0.15327	-0.0443736	-0.217749
ALDH1B1	0.101731	-0.172547	-0.103837	-0.102824	-0.0617848	0.0293195	0.172561	-0.00955375	-0.132651	-0.0514649	-0.117893	0.163856	-0.211936	-0.141263	0.126788	0.411975	-0.206112	0.186242	0.169016	0.348264	0.0348578	0.179749	0.520369	-0.294426	0.28667	0.00770586	-0.0673104	0.0224663	-0.110048	0.078953	-0.15152	0.0638376	0.374005	-0.198321	0.621189	0.102626	-0.0935564	0.103917	0.167916	0.0291397	0.472403	0.0238907	-0.0743721	-0.0896325	-0.0993943	0.278736	0.021478	-0.312732	-0.33511
ALDH1L1	-0.139856	0.164005	0.121043	0.00374532	-0.0841462	0.127313	0.116894	0.183912	0.230697	0.010798	-0.0692776	0.0906953	-0.172659	-0.285113	-0.0902246	0.0666471	-0.186157	-0.0670064	-0.110957	-0.0896937	-0.025029	0.109328	0.000492043	-0.0774096	0.4432	-0.280927	0.0730861	-0.232698	-0.0642339	-0.105867	-0.00651941	-0.0710821	-0.103598	0.0163513	0.144851	0.0487463	-0.157843	0.0415209	0.271555	-0.0666456	0.0100181	-0.276017	-0.0164356	-0.232349	0.308264	-0.0295571	0.115073	0.15761	0.00562157
ALDH1L1-AS2	-0.0461856	-0.131987	-0.0170086	-0.00651941	0.015204	0.099551	-0.140967	0.000517789	0.417237	0.148117	-0.105617	0.130143	-0.183256	-0.114437	0.0227407	0.100875	-0.102095	-0.10075	-0.351451	-0.542167	0.115871	-0.0126195	0.328106	-0.167402	-0.00567875	-0.611589	-0.0284757	-0.490963	-0.396391	-0.0665095	-0.314547	0.190064	0.672575	-0.00882459	0.211824	0.00957729	-0.197121	-0.0259266	-0.24202	-0.0534636	0.0721961	-0.153884	-0.110321	0.248004	0.334231	-0.0687804	-0.0748812	0.00885745	-0.298731
ALDH1L2	-0.150608	-0.0227449	-0.0602472	0.0718578	-0.0536782	-0.0976907	-0.1798	-0.052117	-0.0307679	0.0983895	-0.012797	0.00786483	-0.0101165	-0.0171858	0.0636872	-0.127097	0.0517957	0.0373458	0.0144021	0.00236933	0.0682244	0.105169	0.0172408	-0.1373	0.0679692	0.160427	-0.0403512	-0.0723902	0.0127468	-0.29076	-0.0598015	-0.228322	0.020816	-0.0732528	0.0895448	-0.0612018	-0.0860661	0.236367	0.0412536	-0.0551905	0.0181594	-0.151554	-0.0933489	0.0482893	0.0588511	-0.114324	-0.0358644	-0.0449184	0.119103
ALDH2	0.0551632	0.0672484	-0.299922	-0.188472	-0.145274	-0.390874	-0.92972	-0.8286	-0.454058	-0.360449	-0.877134	-0.139753	0.265037	-0.446311	0.301453	-0.293064	0.165492	-0.529949	0.0882524	-0.00184676	-0.123448	-0.603777	-0.229589	0.24378	-1.03004	0.244729	-0.512183	-0.65704	-0.00576165	-0.614413	0.260325	-0.663882	-0.499342	0.214564	-0.149401	-0.34132	0.131496	-0.0140866	0.283759	-0.420142	-0.464887	0.382803	-0.644927	0.608552	0.275759	0.000280907	-0.471015	-0.0253528	-0.388404
ALDH3A1	-0.462386	-0.238106	-0.0980381	-0.488143	-0.260143	0.0411789	0.146672	-0.0236694	-0.248055	-0.127842	-0.30341	0.00539099	-0.0705193	-0.021273	0.47806	0.462063	-0.175161	0.0404431	-0.330413	-0.212038	-0.264807	0.276837	0.209137	0.118148	0.593361	-0.204309	-0.109894	0.0398275	0.133168	-0.134229	-0.127842	-0.017139	0.299161	0.0193163	-0.0504563	0.177152	0.131418	0.00200219	0.32582	-0.0804696	0.189329	0.00728346	-0.113294	-0.0591362	0.0176718	-0.263309	-0.312466	0.193135	0.176563
ALDH3A2	0.463185	-0.0600119	0.0196103	0.354428	0.263266	0.318061	-0.125314	0.0650274	0.239336	0.337204	0.0521464	-0.0261825	-0.00807964	0.1194	0.28698	0.078953	0.308603	0.164412	0.409846	0.31824	0.474217	0.0159686	-0.217159	0.0771743	-0.0463347	0.245088	0.147827	0.0835615	0.253259	0.37209	0.162968	0.125447	0.0203988	0.217882	-0.184485	-0.0725497	0.218859	0.135632	0.5673	0.218739	-0.026928	0.254681	0.0690285	0.351052	0.0766435	0.0640505	-0.373548	-0.304238	-0.519821
ALDH3B1	0.256565	0.104131	0.196959	0.060241	0.047704	-0.226942	-0.387235	-0.112748	0.130929	0.123997	-0.180287	0.219785	0.21827	-0.173617	0.488251	0.156092	-0.0634179	-0.0940488	0.126243	0.00895952	-0.0817594	-0.0163894	0.29931	0.280787	-0.0222614	-0.0666956	-0.431642	-0.305176	0.0532235	-0.255626	-0.051179	0.00972824	-0.208688	0.421959	0.120611	0.0938091	-0.141302	-0.175814	-0.144853	0.137612	0.000788624	0.323057	0.00124879	0.0312011	0.316004	0.208365	-0.319242	-0.586062	-0.485229
ALDH3B2	0.0313131	0.144394	0.154017	-0.0177658	-0.0219772	0.235728	-0.0506191	-0.0141128	0.0266525	0.0689193	0.117532	0.124128	-0.0906878	-0.0244616	-0.00755945	0.0917996	-0.156499	-0.0570136	0.0562441	-0.128966	0.0878919	0.158527	0.0278751	-0.101585	-0.00184676	0.0215724	-0.117438	0.0228816	-0.2058	-0.0862886	0.0477562	0.502274	-0.158149	-0.130052	0.323057	0.276697	-0.278348	-0.0743721	-0.20087	0.149423	0.0113065	0.0745977	-0.131704	0.0945708	-0.0325015	-0.107668	-0.0122441	-0.119632	-0.0291828
ALDH4A1	0.00065492	-0.107561	-0.0806694	-0.112459	0.00817987	-0.187543	-0.26237	0.124911	-0.0956152	0.0746804	-0.253094	-0.130319	-0.222164	-0.226547	0.121109	0.357997	-0.333228	-0.0868434	-0.00621841	-0.038345	-0.175952	-0.203994	0.133274	0.252704	0.0849591	0.106898	-0.100364	-0.117979	-0.265909	-0.103533	0.0106949	-0.0974376	-0.195237	-0.0317058	0.124635	0.272027	-0.212569	-0.0159552	0.199505	0.258665	0.00989186	-0.0935815	-0.1731	-0.100046	0.130868	0.214084	-0.157411	-0.02202	0.0390571
ALDH5A1	-0.153848	0.266557	-0.122571	0.0276769	0.37306	0.494417	0.247438	0.433614	-0.104298	0.801647	-0.117471	-0.00905362	0.378279	0.293103	0.134827	0.839971	0.193328	1.13704	-0.00970381	0.387419	0.00308914	0.0565836	-0.0468804	-0.0201154	0.790152	0.13651	0.3189	0.404867	0.272895	0.517043	0.244906	1.42307	0.48318	0.361688	0.288017	-0.411398	0.568347	0.751167	0.157171	0.585533	0.354556	0.258396	0.451958	0.296881	0.288092	-0.314382	-0.145857	0.078343	0.00690722
ALDH6A1	0.346685	0.168772	-0.00128935	0.0712631	0.36177	0.168067	0.428859	0.152063	0.164835	-0.0683094	0.123075	-0.0600347	0.0929454	0.350961	0.0362969	-0.183408	0.433894	0.293307	0.4408	0.338264	0.325726	0.393452	-0.14393	0.451958	-0.130508	0.025606	0.125169	0.464428	0.418891	0.555103	0.135187	0.101066	0.134789	0.442395	0.0177153	0.10094	0.3236	0.639559	0.35298	0.322962	-0.0179202	0.53259	0.563809	0.276025	0.135019	0.400516	0.0211265	0.0644321	0.126893
ALDH7A1	-0.107866	0.021478	0.0236777	0.149183	0.109129	-0.0387957	0.00202639	0.0249646	-0.0332389	0.0926627	-0.2763	-0.00606782	-0.00928755	-0.256697	0.0427099	-0.0285379	-0.130415	0.0665188	-0.0626223	-0.195615	-0.161446	-0.151872	-0.0588102	-0.0987297	0.26597	-0.0786813	0.0404958	0.0439237	-0.108507	0.00960421	-0.034313	0.0568775	0.0710918	-0.0589226	-0.225833	0.146563	-0.0550553	0.129529	0.0561884	-0.0502252	0.039358	-0.0766126	0.0916539	-0.313275	0.0620461	0.0991408	-0.0475822	0.229828	-3.74e-06
ALDH8A1	-0.573759	0.116264	-0.110411	0.525554	0.902188	-0.0337898	-0.00977601	-0.121961	-0.999208	0.253796	-0.506968	0.0564011	-0.0334126	0.0549622	-0.0646064	-0.806481	-0.0783748	-0.641089	0.283228	-0.738286	-0.403571	-0.0939673	-0.0819159	-1.08869	-1.01958	0.157935	0.70372	1.45295	-0.529014	0.144816	0.0739025	-0.177833	-0.209454	-0.399345	-0.54315	-0.565462	0.111986	0.44911	-0.183408	-0.294426	0.0786808	0.86251	0.504385	0.396034	0.29339	-0.470586	0.310728	0.307312	0.00588478
ALDH9A1	0.249891	0.279546	0.0623696	0.337393	0.428057	0.309282	0.524614	-0.00374895	0.127719	-0.257342	0.502807	-0.0433109	0.482311	0.501747	0.424013	-0.151836	0.641184	-0.0717706	0.479727	0.353163	0.21074	0.364787	-0.192475	0.610501	0.12779	0.554115	0.224295	0.282585	0.639559	0.498012	0.297807	0.380624	-0.188385	0.382427	0.265159	0.546303	0.327676	0.690901	0.374454	-0.384734	-0.134029	0.893671	1.2426	0.501459	1.11605	0.780775	-0.555844	-0.283128	-0.210474
ALDOA	0.0191811	0.0647247	-0.0436229	0.368197	0.280708	-0.0249607	0.334049	-0.399491	-0.0204591	-0.646262	-0.0413439	-0.0390957	0.44728	0.120759	0.0629334	-0.550247	0.350157	-0.335996	0.260325	0.139175	-0.0849542	-0.036368	0.0920868	0.729843	-0.440189	0.00145876	-0.0958046	-0.116438	0.265091	0.0192846	0.210535	0.0247081	-0.669254	-0.190191	0.214797	-0.138438	-0.161446	-0.208283	-0.2246	-0.159409	-0.46872	0.570817	0.033018	0.279896	-0.0074151	0.475673	-0.443632	-0.182285	0.0273849
ALDOAP2	-0.158256	0.106488	-0.217652	0.233032	-0.056384	-0.0158262	-0.111236	-0.130475	0.108296	-0.0354371	-0.254194	-0.0919579	-0.22792	0.169999	0.118184	0.272768	0.276494	0.626582	0.367353	0.0517435	-0.170059	-0.120283	-0.020718	-0.179881	0.194667	0.316673	0.147104	0.103476	0.0406949	-0.363657	-0.00780738	0.0940209	-0.00933166	-0.433942	0.784338	-0.026928	-0.0403041	-0.148704	-0.17787	0.484751	-0.0483927	-0.0522746	-0.0746641	-0.431447	0.0271613	-0.140205	-0.139071	-0.0762261	-0.0425855
ALDOB	0.0121214	-0.0790675	-0.0529266	0.0274321	0.113781	-0.0123248	-0.022213	0.0449583	0.101066	0.211419	0.0628604	0.229143	-0.00619351	-0.104738	-0.0104262	0.0576284	-0.0321494	0.0059648	-0.0747672	0.00336123	-0.0782431	0.0975583	0.159904	-0.123084	0.0358088	-0.042347	-0.00139826	-0.108598	-0.116319	-0.137221	-0.00224097	0.0265658	0.0685685	-0.00641849	0.0687819	-0.0287165	-0.151944	0.00979304	-0.0428466	0.0163027	0.0383143	-0.0314211	-0.0452577	-0.0697022	0.00035598	0.0348328	-0.0620822	0.102876	-0.0459301
ALDOC	0.0424396	0.284872	0.462422	0.511382	0.272564	-0.000178351	0.318663	0.109129	0.109365	0.0246639	0.162062	-0.00484506	-0.0418704	0.157974	0.149685	-0.0508978	0.0503119	0.0165316	0.0729299	-0.0600347	-0.0668951	0.567626	0.133503	-0.124931	0.126712	0.138718	0.194708	0.367729	0.674112	0.294125	0.11954	0.135469	0.27963	-0.0815589	0.540063	-0.218746	0.301367	0.0735032	0.360889	0.163325	-0.345595	0.502482	0.0544643	0.568347	0.0525199	0.235632	-0.233989	0.0697539	-0.0779261
ALG1	0.00303605	0.0376483	-0.201281	-0.00370281	0.0299856	0.154554	-0.0944637	-0.188553	-0.501204	-0.0319357	-0.0754766	-0.0571757	-0.154968	0.144506	0.239686	-0.110957	-0.260262	0.0908217	0.000846836	-0.149327	0.150886	-0.317362	-0.193277	0.0203155	0.0290553	-0.153436	-0.121801	-0.183573	0.406427	-0.1039	0.0865499	0.202511	0.255257	0.333185	0.22132	-0.141843	-0.0455737	-0.687618	-0.227092	-0.0549891	-0.223639	-0.0112347	0.0135849	0.041921	0.144745	0.289021	-0.120905	-0.045152	-0.0346917
ALG10	-0.0474707	0.100639	0.212517	-0.0703053	0.010893	0.111849	-0.136168	0.142361	-0.102861	0.0715189	0.034359	-0.0581784	-0.0396686	0.118404	-0.181694	-0.0984513	0.300924	-0.082855	0.208423	0.165141	0.102758	-0.230105	-0.140262	-0.412876	-0.347858	-0.156261	0.180311	0.378498	-0.102946	-0.0859835	-0.00588769	-0.0250608	0.391343	0.189459	-0.0208625	-0.194612	0.242966	-0.272117	0.547343	-0.0427657	0.0589425	-0.0848191	0.131901	0.0862785	-0.199071	-0.0526587	0.228248	-0.0392276	0.255868
ALG11	0.0127198	0.075115	-0.326109	-0.158824	-0.199312	-0.145194	0.0740164	-0.195364	-0.24572	-0.0117149	-0.0112108	-0.382748	0.157079	0.369759	-0.0252562	-0.285716	0.327325	-0.00296491	0.0310366	0.215901	0.10253	-0.165874	-0.421061	0.0748146	-0.214983	0.0307827	0.147144	0.225272	0.293185	0.458043	0.151172	-0.298442	-0.155019	0.169349	-0.266926	-0.170972	0.450747	0.0560819	0.554405	-0.27821	-0.380754	0.176044	0.13772	-0.0888799	-0.23061	-0.20547	0.321405	0.00164772	0.18899
ALG12	-0.267722	-0.781268	0.147905	0.0583496	-0.094997	-0.0450343	-0.341617	-0.00128935	-0.372507	-0.196415	-0.189447	-0.115285	-0.168965	0.101224	0.230869	0.0766103	0.0234608	-0.132448	0.387299	-0.433719	-0.33874	-0.340396	0.34772	0.300553	-0.0704905	-0.283698	0.0304217	0.176239	-0.103007	0.112749	0.188845	-0.206488	0.138211	-0.249334	0.465635	0.328189	-0.0971103	0.105132	-0.0186853	0.539251	0.0981695	-0.0524346	0.0303798	-0.0640764	0.0424657	0.174974	-0.51599	0.00148441	-0.402327
ALG13	-0.117584	0.0999494	0.0788026	0.0163284	-0.0689144	0.235215	0.199359	0.101731	-0.0338186	0.257328	0.296342	-0.330222	0.165814	0.257998	-0.150099	-0.0644012	0.272488	0.0719458	-0.0510222	0.285421	0.372487	-0.0116212	-0.212344	-0.150567	-0.122636	-0.00659749	0.301862	0.264361	0.179275	0.342669	0.261254	-0.22553	0.198571	0.126288	-0.121147	-0.0676903	0.378629	0.104581	0.299161	-0.299495	-0.217595	-0.0518379	0.245088	0.051772	-0.135359	-0.186612	0.027815	-0.0455737	0.21191
ALG14	0.172913	0.429687	-0.519821	-0.398502	-0.0984167	-0.183536	0.130833	0.137318	-0.283698	0.182565	-0.197743	0.0625843	-0.180335	0.227793	-0.172588	0.077841	-0.124828	0.00223412	0.495563	0.00339025	0.31159	0.110176	-0.223795	0.0933387	0.210325	-0.116917	0.188942	-0.0274964	0.265356	-0.0305823	0.191793	-0.184005	0.0209996	0.431497	0.0924991	-0.227039	0.0948294	-0.331904	0.216684	-0.132957	0.0346709	-0.319242	-0.0443953	-0.102912	-0.196138	-0.163551	-0.230942	-0.282487	-0.224901
ALG2	0.137972	0.195782	-0.062564	-0.243359	-0.105496	0.048541	0.207122	-0.0650817	-0.145444	-0.0454071	0.234907	-0.194612	0.113978	0.212229	0.0790177	-0.0499987	-0.0178113	0.082601	-0.00664763	0.1283	0.152018	-0.0381968	-0.102946	0.286447	0.000788624	-0.0173485	0.0611154	0.109973	0.177294	0.054577	0.0598804	0.102325	-0.125907	0.150107	0.074906	-0.306374	0.209976	-0.0507011	0.240022	0.112509	-0.0277328	0.275198	-0.0271221	-0.127842	0.0447841	0.0275269	0.0738083	0.0924272	0.235838
ALG3	0.0876252	-0.0707668	-0.145932	0.267927	0.0814494	-0.1389	0.14632	-0.0686366	0.0318869	0.183016	-0.0783268	0.060695	-0.00644047	0.123865	0.00856687	0.00685605	0.0383694	-0.0355362	0.187566	0.0321443	0.00871685	-0.035008	0.0466586	-0.0746641	0.187566	-0.0570948	0.0231393	0.0249646	0.0556146	0.0519996	0.0470458	0.111037	0.12881	0.53459	0.0710264	0.114261	0.239894	0.00763551	0.267874	0.0962674	0.153757	-0.035782	-0.129986	0.158491	0.284405	0.141988	-0.290539	-0.236907	-0.316077
ALG5	-0.0610447	0.0717978	-0.384992	-0.0549891	0.0414684	-0.241176	-0.069914	-0.169123	-0.0731487	0.178486	0.00963154	-0.143539	-0.102708	0.0398025	-0.291073	0.0142085	-0.036215	0.0397493	-0.00632748	-0.0564272	0.107688	-0.130642	-0.233818	-0.18797	-0.0974698	0.0362498	0.184399	-0.0689957	0.0825443	-0.0341708	0.0847708	-0.0500244	-0.10914	0.244033	0.0238599	-0.140853	0.0966693	-0.0832638	-0.0288111	-0.00675232	-0.0482447	0.170366	-0.127366	0.120404	-0.163319	-0.0264447	-0.101554	-0.0986381	0.129033
ALG6	0.0584624	-0.0344265	0.047732	-0.47037	-0.188016	-0.136469	-0.124426	0.00124879	-0.539744	-0.255098	-0.254522	-0.26563	0.168564	0.204857	-0.105171	-0.0540951	0.0224663	-0.013722	-0.128247	0.218063	0.167617	-0.0994798	-0.444322	0.140267	-0.109809	0.287948	0.277797	0.313128	0.0828806	0.288958	0.198376	-0.279086	0.0572034	0.267994	-0.282676	-0.206391	0.300553	0.0725228	0.283488	-0.438826	-0.272353	0.13123	0.128556	0.127827	-0.119694	-0.169619	-0.207518	-0.00211516	-0.0358926
ALG8	0.156514	-0.291481	-0.307214	-0.509492	-0.118674	-0.20391	0.0326683	-0.10685	-0.307144	-0.0806092	-0.0787043	-0.450459	-0.27821	0.262614	-0.660268	-0.429666	0.172122	-0.0863512	0.26388	0.153945	0.0384463	-0.187738	-0.729584	-0.122764	0.0510904	0.236311	0.0366641	0.177244	0.326187	0.31694	0.209083	-0.160538	0.0318869	0.286911	-0.50431	-0.363993	0.268447	0.265653	0.10839	-0.044566	-0.0269799	0.28629	0.209976	0.0276215	0.0031896	0.0177851	-0.27034	-0.494974	0.126175
ALG9	0.089678	-0.123475	0.0209223	-0.269191	-0.0439212	-0.0342822	0.166349	-0.229418	-0.359039	-0.242837	-0.0674103	-0.0614175	0.00914157	0.628422	-0.196244	-0.429522	0.161204	0.0386201	0.323131	-0.213151	-0.150778	0.047861	-0.237352	-0.044965	-0.313275	-0.0582037	0.310172	0.23028	0.440988	0.126211	0.165591	-0.211988	-0.220413	-0.248838	-0.0249054	-0.2972	0.108524	0.218599	-0.425556	-0.116379	-0.127023	0.450185	0.416747	0.0968684	-0.0344792	0.358579	0.117232	0.184707	0.330644
ALK	-0.081342	-0.278833	-0.00879586	0.160726	-0.0528718	0.14576	-0.311811	0.197939	-0.0195778	0.175244	-0.0416588	0.137355	-0.152716	-0.237128	-0.171012	0.150528	-0.18797	0.503676	-0.0010104	0.0797925	-0.0432828	0.060843	0.0888829	0.127677	-0.217958	-0.159369	-0.224704	-0.148413	-0.171829	-0.143604	-0.281265	0.0138655	0.078113	0.0905477	0.129455	0.0949167	-0.224399	-0.208611	0.0580897	0.255812	0.143319	-0.013512	-0.217492	0.131981	0.0449325	0.129967	0.155527	-0.132984	-0.019466
ALKAL2	0.262878	0.715531	0.253304	-0.0830967	0.0441322	0.0540906	0.094053	-0.0986644	-0.29121	0.0123647	0.406988	-0.0711129	0.205369	0.025606	-0.149963	0.0365578	0.0429489	-0.0799573	0.0593929	0.266636	0.391226	0.245406	0.0822031	0.252022	0.163146	-0.213864	0.0233645	-0.160614	0.190471	0.0735936	0.209917	0.1082	0.0758981	0.354428	0.0853968	-0.241763	-0.0188818	0.0632552	-0.285549	0.134827	0.0131307	-0.0291044	-0.100724	-0.151693	0.00236933	0.127313	-0.213098	-0.0852341	0.124566
ALKBH1	0.207122	-0.0768328	0.0806353	-0.116048	0.0400548	-0.120116	-0.18696	-0.140718	0.064226	-0.203958	-0.199312	-0.231193	0.0613424	0.0110347	-0.260993	-0.367801	0.00472881	-0.0594497	0.0511579	-0.0628785	-0.29902	-0.194176	-0.0897214	-0.0327949	0.0684665	-0.0797421	0.174007	0.0952088	0.0944017	0.011448	0.1439	-0.0878282	-0.122996	0.188502	-0.388867	0.105428	-0.0341995	-0.0220665	0.0743167	-0.195322	-0.260082	0.0675199	0.295837	0.068883	0.157043	-0.0500244	-0.00570901	0.259	0.197337
ALKBH2	-0.354623	-0.445548	-0.197249	-0.18209	-0.0204852	0.0761523	-0.0140179	-0.0990476	-0.157501	-0.297577	-0.0497286	-0.374619	0.039358	0.0598804	-0.234705	0.0138882	-0.037585	-0.643039	0.00752999	-0.215114	0.0247836	-0.0749718	0.23996	-0.320151	0.478918	-0.408266	0.318986	0.0639735	0.285146	0.167533	0.0820838	0.0180578	-0.021251	-0.541641	0.0391869	-0.139469	-0.0414763	-0.0985594	-0.00145594	-0.27637	0.00786483	0.0397734	0.20447	0.0515404	-0.200825	-0.055084	-0.295441	0.199559	0.21339
ALKBH3	0.0614679	0.0113249	-0.34132	-0.154284	-0.0730433	-0.20824	-0.0540691	-0.2438	-0.583834	0.0413324	-0.374998	-0.544457	-0.113321	0.254863	0.0583751	-0.177709	-0.0846207	-0.0976103	-0.0137703	-0.042172	-0.0561138	-0.225833	0.025606	-0.39053	-0.188255	0.0494631	0.373412	0.167575	0.637951	0.0643489	0.338602	-0.384867	-0.0614431	-0.433548	0.273848	0.0291104	0.0469712	0.223882	-0.266805	-0.205834	-0.168511	-0.16954	-0.0283757	-0.0929561	-0.608277	-0.510194	-0.028298	0.209083	0.257195
ALKBH3-AS1	0.151546	0.0638622	0.201378	0.0377882	0.00528318	0.047125	-0.0145811	0.277643	0.0385655	0.101831	0.0597878	0.368197	-0.094348	-0.506968	-0.2049	0.37467	-0.276426	0.136311	0.0558252	0.113844	0.192592	0.158869	0.444874	-0.186926	0.179609	0.180098	-0.338317	-0.0494525	-0.453211	-0.230942	-0.304546	0.0415768	0.502807	0.089678	0.138466	0.136223	-0.146068	-0.393394	0.171748	0.343799	0.296728	-0.257208	-0.187543	-0.111206	0.317461	-0.0506766	0.0663598	-0.0862029	-0.170332
ALKBH4	-0.370136	0.00416667	-0.180656	-0.373548	-0.0749718	-0.373986	-0.392458	-0.289692	-0.69205	-0.185736	-0.516819	0.0723878	-0.0631812	0.240631	0.20246	-0.00634868	0.00135122	-0.232765	0.221609	0.380458	0.0799352	-0.506124	-0.155341	0.118946	0.0625561	0.210429	0.143074	-0.130602	0.172219	0.00644572	0.180528	0.32999	0.308695	0.255085	-0.181057	-0.331174	0.130929	0.868062	0.20256	0.0841054	-0.11294	0.257265	0.102463	0.412265	0.186413	0.102163	-0.162701	0.256382	-0.0384537
ALKBH5	-0.175864	-0.156018	-0.136537	0.144784	0.137003	-0.0373385	-0.0921296	-0.18486	-0.155412	-0.256201	-0.274763	-0.00659749	0.0256857	0.148787	-0.0470095	-0.0497789	0.0117772	-0.0575522	0.104671	0.0512622	-0.00356365	0.0395399	0.231407	0.177815	-0.0255725	0.0225934	0.0181387	0.0699221	0.208579	0.100535	0.101451	0.101731	-0.038842	0.0855241	-0.0271455	0.0342465	-0.00184676	0.0691987	-0.0379938	0.0815807	-0.0488583	0.383577	-0.0253084	0.0775648	0.0395165	-0.0209637	-0.00689776	0.260876	0.205112
ALKBH6	-0.0816168	-0.367671	-0.102678	-0.200222	-0.0607283	-0.149053	-0.287813	-0.368153	-0.467364	-0.306621	-0.259768	-0.506382	0.19552	0.343052	-0.270723	-0.147934	-0.038842	-0.257556	-0.0437224	-0.0996678	0.0549092	-0.299495	0.149801	0.344902	-0.459399	0.0401558	0.203893	0.306096	0.26388	-0.270543	0.149149	-0.212406	-0.271258	-0.485498	-0.263753	-0.75351	-0.128619	-0.120712	-0.0907698	-0.288104	-0.155247	0.300924	-0.319531	0.0912311	-0.404589	-0.0614694	-0.402076	0.0948294	-0.038345
ALKBH7	-0.288591	-0.246983	-0.233085	-0.097355	-0.128181	-0.104776	0.000137648	-0.0961214	-0.225059	-0.150423	-0.224399	-0.238589	-0.078058	0.0678359	-0.139305	-0.152235	-0.0111431	-0.403103	0.0516272	-0.025204	0.103169	-0.167144	0.150886	0.0575513	-0.286015	-0.111605	0.157568	0.202999	0.14726	-0.00211516	0.0816927	-0.128439	-0.196415	-0.227039	0.0140433	-0.0570684	0.117386	0.174621	-0.0741277	-0.28744	-0.0838589	0.211474	-0.00826967	0.195457	-0.173898	-0.0710821	0.0325848	0.274879	0.168151
ALKBH8	0.410429	0.50628	-0.224065	0.0239456	0.0111778	0.313393	0.520036	-0.00905362	0.268185	-0.0197311	0.238249	-0.250941	0.00945405	0.419729	0.215318	-0.20472	0.407259	0.099519	0.244906	0.52651	0.786855	0.246043	0.155328	0.153645	0.0332799	0.0683154	0.284328	0.745371	0.751167	0.5871	0.296645	-0.15609	0.356897	0.309702	0.36466	-0.148413	0.177152	0.334746	-0.345685	-0.134839	-0.159468	0.172913	0.378764	-0.0118939	-0.183052	-0.00832394	-0.113039	-0.259007	0.0553157
ALLC	0.000846836	0.368437	0.232278	0.0444748	0.132117	-0.131847	0.166816	0.309128	0.645617	0.201281	0.262212	0.530094	0.251021	-0.119791	0.191216	0.361185	-0.14475	0.0541737	-0.197688	0.0371373	-0.0105259	-0.0131473	0.287129	-0.379354	0.0732039	0.193878	0.0508296	-0.069914	-0.213444	0.23202	0.0326683	0.302226	0.510238	0.196097	1.00526	0.348586	-0.253318	-0.0766406	0.192592	0.258338	0.255996	0.254185	0.064457	0.307922	-0.191892	-0.0322434	0.210071	-0.0263383	-0.0793438
ALMS1	0.233032	0.177896	-0.0595759	0.154509	0.120001	0.685457	0.575202	0.0787101	0.101255	0.02378	0.261745	-0.0303802	0.280866	0.395639	-0.0959973	-0.282215	0.307054	0.337995	0.711083	0.350851	0.505372	0.403776	-0.0429349	0.32716	-0.203278	-0.211762	0.376267	0.32828	0.40713	0.272206	0.269393	0.141933	-0.00213754	0.198528	-0.00209448	-0.240226	0.27296	0.101605	0.0770568	0.0407194	-0.220413	0.613918	0.711083	0.385722	-0.107017	0.0938392	0.177196	0.0234343	0.0631893
ALMS1-IT1	0.226676	0.15508	0.0552204	0.139324	0.0518215	-0.325203	-0.0418949	0.121739	0.0044979	-0.043868	-0.224113	-0.0631812	0.244348	0.0981695	-0.0213166	-0.126534	0.252771	0.19541	-0.0288624	0.545282	-0.248496	0.0243364	-0.107047	-0.269143	-0.674565	0.0404704	0.0191177	-0.096428	0.104231	-0.276017	0.0426732	-0.268117	-0.165523	-0.069944	-0.0415554	0.0514247	0.148571	-0.217058	-0.101437	0.242469	-0.11038	-0.118101	-0.475357	-0.0481316	0.107395	-0.332554	0.483391	0.259375	0.392648
ALMS1P1	-0.117859	-0.0580265	-0.297805	0.500061	0.15049	-0.0197557	0.00430593	0.268331	0.376758	-0.021474	0.409672	0.130261	0.150782	-0.0714163	-0.246479	-0.00121785	-0.153276	-0.00667288	0.119618	-0.0255933	-0.0424802	0.247894	0.0163027	-0.200447	-0.0766406	-0.577954	-0.218051	0.0717489	-0.157343	-0.0318289	-0.175381	-0.131631	0.312709	-0.204999	0.259	0.0935707	-0.296136	-0.251973	0.0357844	0.126823	-0.30341	0.428723	0.11812	0.0997004	-0.237032	-0.427482	0.0332515	-0.289296	-0.27637
ALOX12	-0.376505	0.41329	1.74928	-0.542521	0.078917	-1.62442	0.268057	-0.92972	0.247276	0.0234116	-0.0661766	0.806681	-0.66988	-1.22851	0.424479	1.35584	0.131836	0.440445	0.193281	0.0638109	-0.390698	0.155451	-0.194612	-0.200266	1.9076	-0.285668	-0.14009	0.18086	-0.360153	-0.862658	0.261192	-0.530556	-0.186887	-0.282832	0.323229	0.972336	0.727347	-0.424092	1.18729	0.554774	0.160003	0.436023	-1.10309	0.0105668	0.0202855	1.03509	-0.485229	-0.510194	-0.492277
ALOX12-AS1	-0.396121	-0.165142	-0.0290028	-0.142238	-0.112491	-0.179037	-0.208051	-0.247947	-0.118616	-0.174865	-0.150747	-0.106788	0.391759	-0.023619	0.120901	-0.0806092	0.0313907	0.222294	-0.239201	-0.176473	0.0112016	-0.304711	-0.0553782	-0.0737788	0.0304031	-0.0932145	0.116264	0.0867333	-0.0639858	-0.40343	-0.10596	-0.295656	-0.300433	-0.221327	-0.101437	-0.0976103	-0.413637	-0.402245	0.23202	-0.182246	-0.211325	-0.163982	-0.0422691	-0.342779	-0.278642	-0.158445	-0.125808	-0.0357321	-0.019914
ALOX12B	0.000517789	-0.287942	0.110541	-0.0671018	0.249712	-0.261928	-0.342562	0.0225403	-0.153029	-0.337697	-0.224065	-0.0431734	-0.250452	-0.311317	0.614884	0.289563	-0.182612	0.457637	-0.117584	-0.302065	-0.369518	-0.248555	0.0864378	0.149801	-0.0273718	0.392538	-0.139575	-0.29902	-0.043868	-0.196846	-0.210808	-0.25938	0.0803419	-0.362259	0.0327048	0.408556	0.0509193	0.089678	0.413399	0.103534	0.248532	0.135769	-0.0434839	-0.423723	0.573712	0.0388875	-0.110261	0.0683447	-0.282752
ALOX12P2	0.213756	0.123144	0.299009	0.179749	0.470813	0.239094	0.34444	1.00526	0.652826	0.0314389	0.483391	0.611317	-0.177455	-0.164031	0.272645	0.283021	-0.0750814	0.308603	0.23996	0.532304	-0.121469	1.09339	-0.104776	-0.385814	-0.00231673	-0.352844	-0.0109548	0.103822	-0.513267	0.136876	-0.0134605	0.682158	0.564132	0.214956	0.295931	0.267276	-0.0607533	-0.487667	0.030761	0.478243	0.0895154	-0.0520398	0.175769	0.360889	0.37505	0.228304	0.0558856	-0.393303	-0.239807
ALOX15	0.844246	-0.0900019	-0.159035	-0.427016	0.355478	-0.735062	-0.601604	-0.366751	2.69136	0.420174	1.24762	0.238916	-0.0196787	1.33765	1.05204	0.0249133	1.0297	-0.167107	-0.0185494	-0.421226	-0.685669	-0.272749	0.174446	0.870764	-0.394685	0.739625	-0.0507011	0.266557	0.0605167	0.584981	0.147222	1.11141	0.154337	1.17656	0.444028	3.59908	0.237113	0.17944	1.16733	1.83206	-0.410152	0.689163	-0.57049	0.0111012	-0.245173	1.72294	-0.213539	0.0176388	-0.200175
ALOX15B	-0.123534	-0.0954676	0.0118317	-0.0738404	-0.0302804	0.180098	0.12445	0.0846954	0.190064	-0.0753328	0.102463	-0.0225048	0.030473	-0.274187	0.169095	0.0708924	0.00970732	0.00885745	0.0373206	0.0571226	0.0462951	0.167778	0.0021568	-0.105867	0.235059	-0.34837	-0.0548335	-0.0593991	-0.158407	-0.0715348	-0.249557	0.0507989	0.0382611	0.409956	0.219904	0.015892	-0.141988	0.161665	0.112886	-0.0691615	0.129103	0.0399181	0.0817536	0.350851	0.00533795	0.0478062	-0.0929561	-0.216466	-0.225059
ALOX5	-0.226405	0.488927	0.16255	0.355375	0.374454	0.126788	0.28998	0.140758	0.281075	-0.471385	-0.066034	0.0407729	0.300277	-0.192307	0.288357	-0.162067	0.282935	-0.0188067	-0.293602	0.019396	0.0905757	0.170629	-0.0205672	0.371633	0.0579859	0.535088	-0.399893	0.0303295	0.0618719	-0.0237456	0.0695667	0.121698	-0.215296	-0.174703	-0.23662	-0.0781192	-0.105067	0.335373	-0.21404	0.0589707	-0.076165	0.074374	0.327237	0.384368	0.365397	0.353163	-0.208197	-0.071194	-0.531509
ALOX5AP	-0.326285	1.23521	0.189936	0.415	-0.0707933	0.0253662	-0.368401	-0.187891	0.0318573	-0.716711	-0.449214	-0.233818	-0.0218519	-0.339116	0.203155	-0.190698	0.0589109	-0.92972	-0.899411	0.138211	-0.00854057	0.190106	-0.00527502	0.223656	0.00374532	0.193477	-0.404728	-0.28802	-0.0745012	-0.201761	-0.324634	0.180223	-0.505588	-0.280086	-0.466049	0.127128	0.0817871	0.0910485	-0.143257	-0.1458	-0.725454	-0.137865	0.371287	0.351145	0.439879	-0.200087	-0.321131	0.0987467	-0.348895
ALOXE3	0.303631	-0.317104	0.356248	-0.164762	-0.0266161	0.213976	-0.10185	0.0896086	0.207065	0.169016	0.320943	0.0747173	0.0844434	-0.525671	-0.0483499	0.0192556	-0.0912641	0.26203	0.0794615	-0.128906	-0.107928	0.0244589	0.0990327	-0.0645149	0.0496748	-0.14475	-0.00887455	-0.242992	-0.377376	-0.279442	-0.433548	0.0952088	0.159297	0.0334467	0.121773	0.545967	-0.312466	0.0260908	-0.102404	0.0692875	0.502482	-0.0908023	-0.172693	-0.113265	0.149646	-0.18418	0.106114	-0.145857	-0.00778251
ALPG	-0.303053	0.0837878	0.110906	-0.185415	-0.0682293	-0.235546	-0.163673	-0.0790383	-0.182451	0.115737	-0.348047	0.0307827	-0.466477	-0.313352	0.24026	0.196462	-0.354202	-0.000703817	-0.111048	-0.245781	0.0200546	0.151172	0.277448	-0.0912641	0.301059	0.0202855	-0.175419	-0.348505	-0.35594	-0.23004	-0.127166	0.129529	0.364787	0.143965	0.0810361	0.419394	-0.302444	0.0487784	0.309932	0.149968	0.2918	-0.105529	-0.211716	-0.0696738	0.279215	-0.0842319	-0.000753801	0.206512	0.00864482
ALPI	-0.417638	-0.0854699	0.0987467	0.0336789	-0.429666	-0.483308	-0.167646	0.0217208	-0.191451	-0.225253	-0.243628	0.0638622	-0.197688	0.0508899	0.542716	0.0708593	-0.255337	-0.0733057	-0.283698	-0.428333	-0.135423	-0.02405	0.0244115	-0.114086	0.348801	0.00815391	-0.0722804	-0.304238	-0.134347	-0.366751	-0.229181	-0.0107854	0.364087	0.0278751	-0.0194398	0.21027	-0.03384	0.0146711	0.0851485	-0.0148647	0.0708924	-0.023212	-0.253695	-0.22937	0.119965	-0.304324	0.00472881	0.158491	0.0180377
ALPK1	-0.65704	0.511928	0.57941	-0.143323	-0.0119931	0.105496	0.166097	-0.218614	0.092231	-0.408406	-0.340687	-0.206933	0.208154	0.00740373	-0.379969	-0.347013	0.240995	-0.223747	-0.348604	-0.390255	-0.424092	-0.228575	-0.482573	0.302722	-0.162587	-0.281537	-0.22771	-0.288517	-0.206112	-0.582015	-0.0540125	0.105324	-0.516252	-0.625481	-0.555162	-0.524289	-0.630234	-0.334649	-0.614961	-0.165142	-0.730663	-0.359601	0.191793	-0.411105	-0.389475	-0.248838	0.170875	-0.0235125	-0.160575
ALPK2	0.21659	-0.135728	-0.0167502	-0.11899	0.033509	-0.0246546	-0.0256611	-0.00471867	0.285286	-0.229882	-0.136598	0.237055	-0.152494	-0.094997	0.0740531	-0.00281191	-0.353423	0.307399	-0.025204	0.00148441	-0.0760664	0.120232	0.00876949	0.313718	0.105132	-0.272048	0.0490233	0.45602	0.0130146	-0.0436229	-0.0310677	-0.0465717	0.298709	-0.118356	0.132655	-0.134779	-0.0246089	-0.325417	0.0607566	-0.0876122	0.146797	-0.194007	-0.116499	-0.236981	0.224237	-0.0446277	0.289772	0.157935	0.0606595
ALPK3	-0.216953	0.31205	-0.180856	-0.0186032	-0.2817	-0.107561	-0.231727	0.0827892	0.334588	-0.0666956	-0.0851081	0.101574	-0.0553782	-0.190956	0.283488	0.175609	-0.347345	0.21339	-0.243568	-0.326787	0.0246367	0.0732039	-0.0339166	-0.183408	0.331547	-0.0640764	-0.188255	-0.309832	-0.120221	-0.312892	-0.156301	0.04376	0.106147	0.109024	-0.19074	0.148485	-0.36501	-0.0992035	-0.121961	0.125308	0.230387	0.0626101	-0.111175	-0.108287	0.430531	-0.258537	0.132871	0.141782	-0.149218
ALPL	-0.187853	0.858387	0.903831	0.413849	1.63944	0.852537	1.1916	0.0803419	1.30285	0.114232	-0.341526	0.920713	0.865131	-0.630234	1.72294	-0.0966365	0.196414	0.54839	-0.50768	0.0145538	-0.198516	-0.400802	-0.0749964	0.134213	0.19263	-0.0287623	-0.164996	0.0747173	0.0428428	0.264361	-0.211716	0.333185	0.00588478	-0.516819	-0.547721	-0.4175	-0.711479	0.516208	-0.0549075	0.415793	0.0648596	-0.520825	0.206816	-0.142555	0.656595	0.543328	-0.350299	-0.311167	-0.453027
ALPP	-0.308208	0.0667765	0.269189	-0.0900929	-0.0591137	-0.372507	0.0396683	0.165591	0.284176	-0.120678	-0.207079	0.17971	-0.258247	-0.0589226	0.0413324	0.114081	-0.112202	0.0918707	-0.218563	-0.115824	-0.00201322	-0.00763577	0.798539	0.0560585	0.378995	-0.0204392	-0.0213166	-0.172253	-0.107254	0.0743167	-0.100845	0.135401	0.599015	-0.226498	0.897351	0.0261512	-0.0520123	-0.0256866	-0.148218	-0.01911	-0.0789737	0.338886	-0.0215054	0.11855	0.391491	-0.283342	-0.161564	0.200421	-0.203589
ALS2	0.637951	0.243596	-0.0758401	0.262994	-0.135197	0.131836	0.013743	0.00852071	0.0289244	0.0555784	0.161946	0.0510346	0.281908	0.223491	-0.0782431	-0.0643451	0.43017	-0.127693	0.100396	0.00150059	-0.398502	0.0824835	0.130702	0.0293514	-0.326285	0.0702719	-0.0140179	0.144271	0.169304	0.325456	0.288655	-0.0681971	-0.0537039	0.0532489	-0.00276031	0.136585	0.177558	-0.373341	0.209616	0.353163	-0.185575	0.321977	0.0776853	-0.185815	0.0252547	0.148711	-0.105226	-0.0727636	-0.262313
ALS2CL	-0.00306335	0.0276506	-0.0279161	0.0418904	0.141419	0.0976576	0.238723	0.313797	0.184621	0.177015	0.0528151	0.123997	-0.0151395	-0.0361493	0.148787	0.129166	-0.322857	0.0822605	-0.170616	0.0599733	0.18149	0.198193	0.163956	-0.124227	-0.0217814	-0.127735	-0.168843	-0.189407	-0.0334818	-0.170169	-0.0719882	0.0542985	0.0944657	-0.0139706	0.075427	0.123319	-0.354999	0.0848278	0.0151528	0.136659	0.130766	-0.0109548	-0.151317	0.175115	0.0574915	0.026805	0.0617571	-0.190814	-0.289761
ALX1	0.117769	-0.0446277	-0.0290494	-0.113321	0.0991408	0.313051	-0.093702	-0.130147	-0.0719882	0.253682	-0.0349221	0.0696235	-0.104452	-0.18614	-0.0127431	0.136817	-0.0165537	0.00752999	0.10132	-0.142201	-0.180585	0.00740373	0.128925	-0.253318	0.213915	-0.0731989	-0.112388	0.0562441	-0.109074	0.00672065	-0.09902	0.110581	0.498012	0.154017	-0.367319	0.618784	-0.0348684	-0.562701	-0.360973	0.305888	0.0809398	0.078134	0.160726	0.266375	0.0578722	-0.108866	0.138172	0.211176	0.102876
ALX3	0.00416667	0.347217	0.063316	-0.0924575	0.0510612	-0.539436	-0.0294323	-0.15528	0.0133078	-0.078058	-0.189581	0.15315	-0.236748	-0.380473	-0.00425305	0.838669	0.0885191	0.110695	-0.0429938	-0.781268	0.221977	-0.167402	-0.210378	-0.161661	0.0935707	0.0170875	0.0528151	-0.142456	-0.414408	-0.27172	-0.400333	-0.23345	0.232492	-0.00586523	0.223829	0.317638	-0.434591	0.0272941	0.0159934	0.0523455	0.804168	-0.0568598	-0.157763	-0.119261	0.202362	-0.0292812	-0.120744	-0.139575	0.0755938
ALX4	-0.0181297	0.0275085	0.230751	-0.291667	-0.0838893	-0.114905	-0.0954676	-0.138273	-0.100328	-0.0137703	-0.200697	0.0502294	-0.109478	0.000303062	-0.311099	-0.13677	-0.0690986	0.506543	-0.00471867	-0.0666456	0.156005	-0.0964848	0.306911	0.214747	-0.093702	-0.0131473	-0.255626	-0.105023	0.00571374	-0.256759	-0.146876	0.902188	0.130076	0.115184	-0.0792869	-0.0297447	-0.285249	0.275695	-0.0741837	0.156273	-0.0462568	-0.009064	-0.204044	-0.361933	0.0181594	-0.130052	0.20213	0.18688	-0.217958
ALYREF	-0.170932	-0.0400011	-0.46004	-0.196327	-0.166881	-0.159651	0.252453	-0.716711	-0.336804	-0.731675	-0.266555	-0.391132	0.363589	0.616351	-0.46872	-0.93609	0.511928	-0.623324	0.0977255	-0.0239141	-0.0593991	-0.491958	-0.0454837	0.368331	-0.605379	0.138577	0.134746	0.00728346	0.81154	0.149887	0.657772	-0.37958	-0.542167	-0.0830421	-0.0918156	-0.82347	0.0446743	-0.391366	-0.27749	-0.309138	-1.01568	0.519134	-0.233989	-0.122099	-0.348152	-0.126792	-0.4351	-0.0567212	0.454641
AMACR	0.0872273	0.279831	-0.127601	0.21247	-0.191075	-0.0886803	-0.145229	-0.106679	-0.116846	0.00817987	0.163444	-0.0111431	0.161114	-0.0253528	0.166867	0.126211	0.232624	-0.0295571	0.168701	0.263266	0.14841	0.0169148	0.171932	0.0510092	0.059361	0.227287	-0.0156469	0.0233442	0.190249	0.22132	0.0197434	0.200728	-0.013026	-0.182612	-0.203278	-0.123942	0.0742834	0.15585	0.0690564	0.0445229	-0.00487243	0.0178357	0.140375	0.285617	0.557102	-0.00570901	-0.145699	0.0185839	-0.00843003
AMBN	0.125621	0.124377	0.262931	-0.0899045	0.889297	-0.288434	0.0184836	0.10683	0.252269	-0.0238385	0.136277	0.143038	-0.414408	-0.311236	0.100075	0.437426	0.0278751	0.354428	0.0314983	0.0905223	-0.39917	0.144888	0.26319	0.0710264	0.275811	-0.112234	-0.507435	-0.172219	-0.0228015	-0.213975	-0.293383	0.384964	0.0570093	-0.12118	-0.233235	-0.0198729	0.0496256	-0.553576	0.162789	0.0427641	0.314404	0.119132	-0.306454	-0.100631	0.0861529	0.105592	-0.0940488	-0.302153	-0.347541
AMBP	-0.214173	0.125582	0.289708	-0.195029	-0.113731	-0.298879	-0.382748	0.0589425	-0.26563	0.0857139	-0.231671	0.104335	-0.301259	-0.360863	0.380897	0.268522	-0.474047	-0.146629	-0.136898	-0.304919	-0.226498	-0.0889127	0.0692875	-0.188053	0.325726	0.0630436	-0.369937	-0.047844	-0.230254	-0.126362	-0.490637	-0.160614	0.135401	0.21247	0.0849261	0.462796	-0.178264	0.0294377	0.399468	0.470196	0.336451	-0.454058	-0.284875	-0.11272	0.146756	0.0896437	0.146629	-0.219678	0.0312552
AMBRA1	0.0159468	-0.0442122	0.0126934	0.142883	0.0582339	0.0285521	-0.0141128	-0.0641799	0.0685333	-0.0672573	0.0190332	-0.0895742	0.131005	0.0277347	0.0279582	-0.127911	0.0251404	-0.00145594	-0.0499082	-0.0689957	-0.0129488	0.159582	0.0762135	0.0688584	-0.208782	0.000167998	0.022442	0.0120025	0.146672	-0.00113329	0.0118014	-0.110544	0.0676792	-0.106575	0.16077	-0.051202	-0.125708	-0.0167041	-0.126421	0.014842	-0.0219772	0.104131	0.0316975	0.0871278	-0.0129994	0.0713586	0.389523	0.139909	0.284176
AMD1	0.0110347	0.406526	-0.0594218	0.356679	-0.0629317	0.355897	0.282057	-0.0637017	-0.0239141	-0.325041	0.10329	-0.171343	0.218534	0.191377	0.28237	-0.114739	0.150023	-0.318796	0.154824	0.342351	0.175935	-0.191766	-0.0687329	0.187713	-0.0690461	0.410853	0.0522373	0.252704	0.127166	0.306441	0.22132	0.0489641	-0.219733	-0.167646	0.0198767	0.330357	0.224908	0.142813	0.177644	-0.15419	-0.111261	0.482311	0.66667	0.545685	-0.117979	0.396169	-0.112601	-0.0584064	0.097589
AMDHD1	-0.279018	0.0470211	0.371522	-0.533058	-0.00276031	0.190579	-0.589172	-0.418246	0.144673	-0.677001	0.355265	-0.305176	0.575951	0.0687231	0.0355266	-0.00353412	0.24378	0.296962	0.000303062	-0.354676	0.0859673	-0.169743	-0.332199	0.160359	0.361411	0.705177	0.53606	-0.258078	-0.254867	-0.219037	1.01872	-0.187738	0.123893	-0.194262	0.0318573	0.0911894	-0.266619	-0.287288	0.432721	-0.0403041	0.102595	-0.00715219	-0.170169	-0.340396	-0.170491	0.265037	-0.528686	-0.517394	-0.0573934
AMDHD2	-0.488588	-0.113474	0.132156	-0.119663	-0.539744	-0.267271	-0.45002	-0.291073	-0.0843471	-0.332366	-0.196327	-0.0447046	-0.133635	-0.196798	0.0595632	0.0267549	-0.0905462	-0.460184	-0.505333	0.00644572	0.587908	0.0157928	-0.0911065	0.205226	-0.112601	0.367	0.236528	0.0168086	0.0877134	-0.22265	-0.383226	-0.149182	-0.279086	-0.201324	0.210111	-0.103387	-0.503779	-0.0976462	-0.0576266	-0.0434839	0.0259423	-0.324271	-0.603777	-0.376151	-0.307956	-0.197827	0.016987	0.34244	0.27342
AMELX	-0.0289103	0.162229	-0.021251	0.0586741	-0.0301341	0.0646699	-0.130728	-0.0678106	0.119653	-0.0269505	-0.0349526	0.0936352	-0.0503905	-0.0753578	0.0223379	0.0472938	-0.0251539	-0.266926	0.036478	-0.0282675	0.244906	0.383577	-0.139964	-0.388767	-0.0242461	-0.157245	-0.0125087	-0.0608896	-0.0932631	-0.0123893	0.0601441	0.0600598	-0.0260298	-0.298131	-0.154284	0.396956	-0.090119	0.166591	0.243973	-0.0385006	-0.0648043	-0.209952	0.0778665	0.0513162	0.164888	0.363966	0.141034	0.277308	-0.0129806
AMELY	0.113063	-0.444892	0.0780785	-0.298599	0.0740531	-0.156675	-0.156217	-0.104081	0.200271	-0.0963632	-0.157701	0.085865	0.0535632	0.141117	-0.327946	0.257998	-0.560689	0.0617571	-0.227251	0.00893609	0.0698669	-3.74e-06	0.174238	-0.220072	0.0880162	-0.294969	-0.168634	-0.474887	0.0480358	0.126893	-0.336614	0.0322312	0.32636	-0.104262	0.536685	0.151291	-0.153537	-0.422165	0.178443	0.201789	0.0120025	-0.164686	0.0367738	0.168435	-0.00573514	-0.0509963	-0.0218875	-0.0716406	-0.0268068
AMER1	0.107183	-0.257144	-0.0284245	-0.006165	0.242182	-0.306454	-0.283767	0.276301	-0.141008	0.340721	0.0617864	-0.0663178	-0.0211488	-0.448237	-0.0415554	0.505372	-0.831968	-0.0927031	-0.388284	0.0700783	-0.448024	-0.0267382	0.183112	-0.318608	0.59507	-0.345595	-0.557036	6.45e-05	-0.0434619	-0.346696	-0.0239386	0.0022546	0.0128356	0.19848	-0.011647	0.271489	-0.128936	-0.128378	-0.508497	0.0505093	0.257766	-0.163468	0.110251	-0.239043	-0.267846	-0.180615	0.0818178	0.0685685	0.0814494
AMER2	-0.0367527	0.00551824	-0.039841	-0.0913795	-0.0726755	-0.0620822	-0.148626	0.0837268	-0.00783231	0.0383143	0.0504038	0.0584065	-0.0169145	0.0245587	-0.0441876	-0.0458463	-0.0444217	0.0416262	-0.121431	0.0134136	-0.148179	-0.046765	0.0580316	0.0196103	0.0513434	-0.167532	-0.036074	0.146918	0.0212006	-0.265347	-0.14397	0.0826286	0.116151	0.0130146	-0.0455378	0.190787	-0.0261356	-0.112168	-0.22792	0.06096	0.0271107	-0.0675607	-0.134647	-0.00128935	0.144271	0.143038	-0.0492516	-0.146775	-0.0256866
AMER3	0.0173759	-0.0192042	-0.0365046	-0.0675894	-0.0534409	-0.0710821	-0.0486073	0.219469	0.183834	0.156439	-0.0623704	0.136487	0.117291	-0.246707	-0.0714163	0.0427641	-0.182892	0.0154855	-0.167977	-0.117255	0.0161779	-0.0237185	0.289708	-0.141873	-0.0366032	-0.412202	-0.0537552	-0.226302	-0.0574974	-0.220226	-0.357192	-0.0581477	0.32066	-0.167532	0.199359	0.00065492	-0.0886803	-0.228167	-0.0848768	0.0612061	0.167951	-0.0916638	-0.177381	-0.0761072	-0.126053	-0.0389645	0.0332237	0.00161865	0.00504947
AMFR	0.317971	-0.656231	-0.196103	-0.995165	0.0551632	0.0226415	-0.105867	-0.170491	0.0175188	-0.536126	0.0695667	-0.126959	-0.181655	-0.245345	0.957684	0.481675	-0.282832	-0.113104	0.271777	0.0235408	-0.145376	-0.0959674	-0.226756	0.836277	1.00526	0.409421	0.0951353	-0.131186	0.182609	0.0969593	0.443703	-0.638081	0.319153	0.658407	-0.329732	-0.750134	0.674112	0.0435594	0.627202	-0.1785	0.812402	0.286571	-0.150922	-0.722718	0.730678	0.373878	-0.13927	-0.0619499	0.241891
AMH	-0.151179	-0.239866	-0.235343	-0.346479	0.166639	-0.451399	-0.100483	-0.14302	-0.129313	0.126092	-0.0951762	0.0744932	-0.209551	-0.136272	-0.0422178	0.139476	-0.0233054	0.340898	-0.503779	-0.0410322	-0.22317	-0.182205	0.422255	-0.172097	0.530094	0.160814	-0.128378	-0.319069	-0.0669826	-0.133291	-0.127202	0.245846	-0.210558	0.207273	0.252911	0.462982	-0.0122717	0.0677779	-0.173537	0.0799352	0.0964008	0.119103	-0.335777	0.0363687	0.40713	-0.0355362	0.0624014	0.228023	0.16255
AMHR2	0.159956	0.326081	0.19015	-0.0929284	0.280326	-0.115599	-0.151659	0.090495	0.235728	0.410779	0.0676461	0.24733	-0.51599	-0.36619	0.0912855	0.578307	-0.456441	0.399351	-0.367115	0.26203	-0.208325	0.36466	-0.0302575	-0.0253775	-0.253695	0.201732	-0.513015	-0.482373	-0.77506	-0.331522	-0.776873	0.490994	0.540644	0.088909	-0.0830967	0.281908	0.0660892	-0.204462	-0.0439212	0.446376	0.387948	-0.539032	-0.471572	-0.0693388	0.00504947	0.205858	0.311036	-0.325123	-0.401756
AMIGO1	-0.00342773	-0.738286	-0.0328293	0.0848991	-0.0644012	0.289289	0.151137	-0.0868748	-0.06925	0.0270858	0.0938739	-0.0262838	0.149183	0.293968	-0.399491	-0.437228	-0.35209	-0.0348982	0.259375	0.241297	-0.171629	-0.0962696	0.406659	0.123721	-0.00218343	-0.116469	0.348801	0.319944	0.396956	0.121773	0.0542039	-0.0152696	0.384849	-0.368537	0.497059	0.15327	0.133697	0.248898	-0.272117	0.112749	-0.109197	0.124775	0.0750899	-0.00348115	-0.116675	-0.37691	-0.0625417	0.238551	-0.315292
AMIGO2	0.419279	-0.0036782	-0.0623704	-0.205981	-0.522372	0.15773	0.0872947	0.345002	-0.25357	0.361688	-0.122099	-0.220962	0.118217	0.671405	-0.598051	-0.228674	0.194708	-0.214173	0.111284	0.182828	0.189592	0.273009	-0.268553	-0.128013	-0.54315	-0.364314	0.646089	1.33765	0.411679	0.926792	0.337393	-0.426659	0.273086	-0.439991	-0.366882	-0.261061	0.500741	0.905571	-0.014611	-0.147658	-0.483072	0.403212	0.360781	0.323328	-0.315092	-0.454425	0.522966	0.533745	0.581244
AMMECR1	-0.0105506	-0.0600347	-0.0309437	0.183947	0.115431	0.320276	0.507954	0.152392	0.128414	-0.133869	0.0586245	-0.241647	0.0691669	0.352676	-0.113953	-0.176736	0.237792	0.238189	0.0830392	0.151546	0.20064	0.0973422	-0.138341	-0.189176	-0.162344	-0.337306	0.268699	0.479386	0.302986	-0.0544446	0.301059	-0.0960309	-0.145005	0.0580897	-0.157972	-0.448623	0.108494	0.18444	0.0647247	-0.119016	-0.175503	0.128995	0.336129	0.0514559	-0.223078	-0.147556	-0.0411111	0.123075	0.0663952
AMMECR1L	0.296881	-0.0775148	0.0550451	-0.0527107	-0.214939	0.125095	0.178486	-0.133328	0.0290553	-0.443047	-0.0889127	-0.195578	0.49255	0.346464	-0.0223332	-0.292014	0.0411131	-0.137144	0.0991408	0.0105227	0.146072	-0.0491729	-0.0842319	0.103232	-0.0786534	0.366869	0.313222	0.274739	0.362705	0.345875	0.343179	-0.107254	-0.342111	-0.0404248	-0.305827	-0.0284245	0.301153	0.333473	-0.0460139	-0.0471506	-0.217058	0.332608	0.342135	0.222939	-0.263619	0.292652	-0.238316	0.222591	0.202307
AMN	-0.360045	-0.130384	-0.116172	-0.269459	-0.00463638	0.0119547	-0.256088	0.118873	0.115871	0.0176945	0.00997196	0.0729022	-0.262818	-0.0793183	-0.0417639	0.266506	-0.225833	0.0794035	0.131418	-0.248555	-0.0780333	0.0206596	0.178217	0.0102822	0.184037	-0.113953	0.0237562	-0.0593454	-0.371481	-0.0870205	-0.345792	0.333748	0.151217	0.0399722	0.0132059	0.0903963	-0.200447	0.156092	-0.0204852	0.234788	0.307504	-0.269587	-0.0649964	-0.254021	0.205369	-0.149748	-0.0490965	-0.0532436	0.0274568
AMN1	-0.210949	0.136771	0.335863	0.0546842	0.281986	0.215742	0.0466056	0.181072	0.200328	-0.167688	0.341132	-0.177618	-0.0890048	0.0929132	-0.453435	-0.00834996	0.0998898	-0.0936104	-0.272048	-0.177935	-0.359039	-0.0652313	-0.25871	-0.362508	0.21827	-0.231347	0.177332	0.141387	-0.168965	0.0950473	-0.301013	-0.0301894	0.32215	-0.316394	-0.135666	-0.412337	0.119192	0.172788	-0.0992282	-0.10929	-0.321491	-0.466049	0.132515	-0.215638	-0.110812	-0.297958	-0.20547	-0.566242	-0.628546
AMOT	0.504137	0.0677451	0.160128	0.154125	0.459618	0.549256	0.211064	0.380005	0.222385	0.0976862	0.281688	0.504137	-0.0617578	-0.534115	0.0552204	-0.202517	0.0393856	0.593361	-0.0298667	0.493145	0.492274	0.471221	0.164616	0.233707	-0.0272132	-0.20495	0.167778	-0.265422	0.0115007	-0.0189639	-0.0189639	0.0800538	0.219838	0.0192036	0.513124	-0.0292812	-0.542864	-0.359379	-0.0962696	0.0580897	-0.0421173	-0.165717	0.0987774	-0.0273718	0.19175	0.317551	-0.0262838	-0.418753	-0.00121785
AMOTL1	-0.183885	-0.160503	0.0318339	-0.21052	0.0236216	-0.105496	-0.233869	0.116084	-0.0650817	0.226615	-0.0930521	0.0827534	-0.185656	-0.118164	0.286745	0.112016	-0.327141	0.00242378	-0.042906	-0.00340022	-0.105226	0.176396	0.0630436	0.0722596	0.221609	0.164273	-0.106914	-0.0954676	-0.197162	-0.130508	-0.216809	0.436559	0.243023	-0.00454363	0.0157226	0.202852	-0.159437	0.165405	0.143352	0.257766	0.250544	-0.303337	-0.275235	-0.159568	0.0022546	-0.0965771	-0.0053818	0.0676129	-0.0811174
AMOTL2	0.19205	0.259436	-0.156632	0.182109	-0.030305	-0.255626	-0.312237	0.0864378	0.0197972	0.0717489	-0.255402	0.235728	-0.110755	-0.249116	0.438331	0.240077	0.0855548	0.121216	0.028767	0.0172408	-0.0796371	-0.298507	-0.120221	-0.282752	0.106688	-0.214334	-0.0626807	-0.122261	-0.0438923	0.133985	-0.250632	0.477361	1.34781	-0.0181646	0.494671	0.29642	0.0906153	-0.0249843	0.0364236	-0.10224	0.106589	-0.381011	-0.109894	-0.0544179	0.36237	-0.374378	0.363966	0.111986	0.417806
AMPD1	0.194501	-0.217958	0.525245	0.284486	0.147533	-0.130537	0.112749	0.0196621	0.252831	-0.0155279	-0.0670769	0.0132567	-0.0190105	-0.0368134	0.053785	-0.150001	0.0701401	-0.1337	-0.0918444	0.100978	-0.270104	0.223213	-0.0420959	-0.426472	0.0449583	0.0310366	-0.20441	0.0136535	-0.181608	0.0361409	0.164502	-0.0573428	-0.174821	0.0959973	-0.156566	-0.00511119	-0.0658462	0.33838	-0.198859	-0.050758	-0.0489076	-0.0439487	-0.601109	0.328449	-0.179002	0.0188934	0.366276	-0.182927	-0.128218
AMPD2	0.0924991	-0.135533	0.306545	0.232336	0.489839	0.525554	0.233032	-0.233289	0.324966	-0.408701	0.375603	0.0244804	0.75525	0.0629126	0.839971	-0.00766497	0.581662	-0.299342	0.174538	0.33466	0.200179	0.133384	0.144347	0.496302	0.066457	0.302138	0.0290029	0.0483676	0.0898777	-0.264493	0.079907	0.297981	-0.418581	0.0349797	-0.343432	-0.156018	-0.0285922	-0.0617578	-0.215533	-0.013722	-0.0812915	0.622866	0.162789	0.47916	-0.201184	0.812402	-0.132858	0.381028	0.0839138
AMPD3	-0.107561	0.0809398	-0.019799	-0.260616	0.0869814	-0.209551	-0.0641057	-0.187377	0.23105	0.000408511	-0.266679	-0.0904929	0.0944336	-0.0115492	0.199015	0.0467358	-0.0968983	-0.354999	-0.281055	-0.222272	-0.444322	0.137034	-0.0410581	-0.0687096	-7.68e-05	-0.0248839	-0.183928	-0.245945	0.102799	0.20213	0.0371865	0.021478	-0.241887	0.0398529	-0.00527502	0.00611221	0.0101661	0.224956	0.168602	-0.172857	0.098554	-0.0940488	-0.101876	0.0705823	-0.160031	-0.0340365	-0.295368	0.355048	-0.23723
AMPH	0.038979	-0.210767	-0.0846744	0.0402994	-0.247793	-0.130797	-0.139305	0.0984272	-0.251238	-0.0304447	-0.11132	-0.023258	-0.0223104	-0.291481	-0.145584	0.00752999	-0.43651	0.33999	-0.167402	0.0883475	-0.326027	0.00758616	-0.2712	-0.0745356	0.182109	-0.286424	-0.120053	-0.139669	-0.320669	-0.177935	0.0011192	0.248353	-0.0416588	0.0480358	0.221609	-0.0549891	-0.102649	-0.274391	-0.0903853	0.231736	0.248784	-0.186157	-0.0568052	-0.301106	0.112817	-0.146181	0.115903	0.0603247	0.156827
AMT	0.0799352	0.142248	0.0507165	0.0517957	-0.075254	0.11051	-0.150099	0.216781	0.12779	0.234907	-0.0246546	0.400973	-0.0845002	-0.0983591	0.295155	0.254131	-0.251356	0.348264	0.0805574	-0.111145	0.0112523	0.403473	0.0915471	-0.103211	0.112197	-0.0731487	-0.423352	-0.268359	-0.398885	-0.126131	-0.296458	0.365397	-0.0334126	0.0489118	0.180572	0.0862785	-0.39668	-0.294969	-0.101899	0.0595326	0.222591	-0.282596	-0.130212	-0.544819	-0.0868106	-0.0160058	0.0243364	0.0325553	-0.537998
AMY1A	0.332608	-0.261428	0.836277	0.0776571	-0.353315	-0.040255	0.138702	-0.250878	-0.0860942	-0.111967	-0.389709	-0.481439	0.66939	0.761069	-0.282906	-0.378697	1.04116	0.0124893	0.62474	0.224859	0.549528	0.0423168	-0.00213754	-0.00226879	-0.354855	-0.182451	0.59755	0.233097	0.134061	0.0580316	0.497248	-0.0817936	-0.500118	-0.382748	-0.104144	-0.375275	0.360457	0.299647	0.78797	-0.489375	-0.633361	-0.110261	0.201085	0.172837	-0.476747	-0.0654813	-0.205046	-0.143705	-0.158256
AMZ1	-0.144244	0.078953	0.0877766	-0.0917242	0.0599084	-0.0653985	-0.00584155	0.403885	0.100274	0.194446	0.124128	0.339595	-0.202119	-0.331446	0.208999	0.0876837	-0.199312	0.2315	-0.195111	-0.0449184	-0.0814258	0.225976	0.161984	-0.125278	0.287129	-0.215252	-0.291667	-0.191689	-0.267777	-0.24572	-0.414408	0.14266	0.19263	-0.0139449	0.180012	0.398811	-0.208525	-0.265764	0.100706	0.474217	0.128414	-0.034406	-0.150644	-0.235988	0.393815	0.126488	0.0584311	-0.153884	-0.198232
AMZ2	0.153796	0.2315	-0.110261	0.0303556	-0.0135386	0.211566	0.421736	-0.309921	0.238123	0.301453	0.0473274	-0.436127	0.350259	0.558523	-0.373663	-0.153738	0.0708335	0.224237	-0.0838222	-0.301816	-0.626792	-0.0861235	-0.208006	0.0166285	-0.12015	0.207014	0.473999	0.120232	0.476536	0.500262	0.252771	-0.16772	-0.333117	-0.0427657	-0.256576	-0.256455	0.275952	0.374454	-0.121294	-0.289472	-0.179335	0.328359	0.522338	0.224181	0.192267	-0.200967	-0.19362	-0.149151	0.190249
AMZ2P1	-0.17398	0.0134629	-0.289385	-0.250134	-0.403991	-0.172911	-0.233196	-0.40748	-0.375682	-0.0711707	-0.509368	-0.388867	0.505589	0.234248	-0.213539	-0.399756	0.680006	-0.159992	0.0192556	-0.100223	-0.225199	-0.317279	-0.87304	0.0904277	-0.270214	0.289563	0.239264	0.439378	0.226454	-0.0670544	0.256861	0.283557	-0.20391	0.0356937	-0.30967	-0.325695	0.226033	-0.17562	0.0797925	-0.378579	-0.466713	0.147795	-0.0577852	-0.171456	0.119852	-0.301634	0.045934	0.464015	0.296567
ANAPC1	0.358579	0.00840748	-0.169978	0.218534	0.398679	0.497059	0.225689	0.345963	0.0628296	-0.330222	0.42543	-0.0180023	0.176882	0.276025	-0.0776696	-0.0237185	0.139027	0.433078	0.553843	0.129529	0.252532	0.212071	0.0653479	0.0968995	-0.0582995	0.15327	0.137432	0.283438	0.177896	0.284046	0.18149	0.171834	-0.183292	0.409421	0.235728	-0.0325519	0.145844	-0.156632	-0.0144006	0.0444442	0.0147412	0.393706	0.359967	0.0346078	0.366276	0.315739	-0.0580265	-0.00972879	0.0167844
ANAPC10	-0.0441672	0.132833	-0.283128	-0.352419	-0.541436	0.00314268	0.0200795	-0.1035	0.0147673	0.417655	-0.152085	-0.222363	0.415	0.161114	-0.320295	-0.102495	0.0133319	0.0771743	-0.256201	0.229387	0.589191	-0.335592	-0.200745	-0.41423	-0.174019	0.244604	0.509956	0.0978561	0.200104	-0.10893	0.579058	-0.522372	0.335262	0.070551	-0.170373	-0.0715862	0.340524	-0.0536501	0.264842	-0.627382	-0.0935815	-0.335501	-0.0360512	-0.524543	-0.456211	-0.128511	0.147375	0.0367738	0.117161
ANAPC11	-0.0226712	-0.142688	-0.150135	-0.134198	-0.130926	-0.147367	-0.115992	-0.231444	-0.0317801	-0.0750245	-0.0676658	-0.196369	-0.0391495	0.00145876	0.0956073	-0.181278	0.0894035	-0.131319	0.031917	0.0500648	0.0984272	-0.167498	0.134175	0.20346	-0.318046	-0.0810618	-0.0270433	-0.0167502	0.0458275	0.0490756	0.0243859	-0.113982	0.0902434	-0.0569877	-0.120446	-0.16074	-0.0298667	-0.117227	-0.300213	-0.0853793	-0.233818	0.200373	-0.16481	-0.353655	0.0514247	0.055368	-0.215216	-0.18934	-0.158896
ANAPC13	0.0193398	-0.159992	-0.0386793	-0.295905	-0.230157	-0.258247	-0.229234	-0.389088	-0.0291328	0.0262729	-0.0199864	-0.174482	0.0695357	-0.0159301	0.133985	0.00702869	0.0348578	-0.239091	-0.275667	-0.0490199	-0.0363925	-0.341526	-0.121501	0.0532704	-0.00854057	0.180906	0.0300785	-0.279313	0.0804708	0.204962	0.0932708	-0.190879	0.12686	-0.377506	-0.253817	0.0715846	0.00784293	0.0574058	0.0313131	-0.305751	-0.295225	-0.345891	0.182288	-0.0730686	-0.276159	0.0691669	-0.267208	-0.38264	-0.283971
ANAPC15	0.241237	-0.111288	-0.215989	-0.0734285	-0.295749	-0.0172752	0.0475958	-0.00858633	-0.0218034	0.219272	-0.0680038	0.0696541	0.0511221	-0.00408238	0.0625253	-0.199312	0.078917	-0.145074	-0.137937	-0.182341	-0.267597	-0.229882	0.268752	-0.240994	-0.709363	-0.108986	0.191009	-0.157927	0.042592	-0.406712	0.204719	-0.418581	0.156037	-0.331697	0.197778	-0.520099	-0.383602	-0.269838	-0.114739	-0.30373	-0.155201	-0.228953	-0.316304	-0.497258	-0.323174	-0.240226	-0.210608	-0.288852	-0.311996
ANAPC16	-0.067614	-0.228726	-0.200546	0.0117514	-0.117647	-0.0445382	0.124595	-0.234806	-0.167316	-0.04953	-0.00405588	-0.373235	0.2343	0.319611	-0.281456	-0.23061	0.216949	-0.233539	0.0711221	0.0948579	0.0618164	-0.307452	-0.222164	0.0954369	-0.249603	0.041201	0.344538	0.434595	0.467081	0.340721	0.289772	-0.0633524	0.0211543	0.0779854	0.0482347	-0.0372619	0.316595	0.408856	0.259738	-0.320569	-0.280028	0.390682	0.301862	0.377063	-0.166218	-0.168888	-0.0188566	0.303631	0.197778
ANAPC2	0.131574	-0.309591	0.538559	-0.180985	0.198282	0.0422627	0.203155	-0.0286158	0.0781616	-0.176687	-0.0328293	0.25925	0.278266	0.111741	0.0335642	0.0979704	0.0578965	0.0188259	0.529144	-0.0486516	0.0437811	0.126712	0.649886	0.152931	0.0668314	-0.0861235	0.286745	-0.0830421	0.0580611	0.163491	-0.00834996	-0.16114	-0.127842	0.413849	0.805341	0.165405	0.00963154	-0.00506267	-0.226942	-0.176736	0.27296	0.0853291	-0.306854	-0.249557	-0.11626	-0.025204	-0.287213	-0.374998	0.0219705
ANAPC4	0.323489	-0.0304213	-0.225785	-0.080312	-0.203224	-0.187247	0.0595892	-0.0956152	-0.353655	-0.139333	-0.131987	-0.242784	0.221138	0.417044	-0.350396	-0.351351	0.386125	-0.0322958	-0.0406328	-0.0993623	-0.0503609	-0.305669	-0.133734	0.0872563	-0.355819	0.406127	0.417044	0.470813	0.190635	0.407521	0.424677	-0.399893	-0.00358746	0.189517	-0.236095	-0.115891	0.465635	0.195142	0.501747	-0.368978	-0.26515	-0.0387957	0.0778075	0.289632	-0.161889	-0.484485	-0.117677	0.208423	-0.080577
ANAPC5	0.114776	-0.342666	-0.265486	-0.0114464	0.258932	0.134424	0.329221	-0.179581	0.115544	-0.11899	-0.0588102	-0.299342	0.204169	0.66104	-0.114653	-0.239429	0.657188	0.00205676	0.437603	0.488927	0.300924	0.0767046	-0.216025	0.289498	-0.148909	0.0819809	0.267276	0.255443	0.240179	0.309932	0.317461	-0.122372	-0.192307	-0.122197	-0.14751	-0.398749	0.0675462	0.145674	-0.0684197	-0.0618428	-0.305176	0.43017	0.330076	0.221201	-0.241051	-0.147861	-0.262818	-0.0880531	-0.292518
ANAPC7	-0.0831814	-0.165799	-0.133533	0.206861	0.0546301	-0.142024	0.18659	-0.203135	-0.261061	-0.246771	-0.238875	-0.299772	0.132018	0.334746	-0.223323	-0.138143	0.156483	0.163227	-0.0767455	-0.0726755	0.0601749	0.0723226	-0.39668	0.200728	-0.0595759	-0.0142451	0.147565	0.385505	0.301221	0.197003	0.260819	-0.143323	-0.379849	-0.0755109	0.0956889	-0.31022	0.177771	0.022963	0.0703949	-0.282676	-0.103183	0.17428	0.108684	0.00366259	-0.138143	-0.275941	-0.302775	-0.441355	-0.0413439
ANG	-0.169978	0.0594801	-0.11429	-0.166507	-0.50768	-0.239607	-0.534115	-0.623834	-0.0442951	-0.265486	-0.77506	-0.482573	-1.08261	-0.385952	-0.149925	-0.156991	0.183383	-0.383727	-0.27877	-0.171343	-0.473169	-0.25951	-0.54315	0.764288	0.146797	-0.483528	-0.553287	-0.623324	-0.0130975	-0.571652	-0.0311425	-0.392055	-0.179581	-0.233989	-0.667164	-0.198232	-0.0778383	-0.904148	-0.153091	-0.292211	0.153106	0.346273	-0.509368	0.652053	-0.267722	0.643192	-0.0687804	-0.0122187	-0.412202
ANGEL1	0.156215	-0.00654569	-0.107254	-0.0318553	0.240631	0.200179	0.107958	0.215375	0.18149	-0.0892375	0.179661	0.0118317	0.118404	0.0167316	-0.0108587	0.0958217	-0.121088	0.12942	0.144044	0.14826	0.327071	0.0888829	-0.0689144	0.00583591	0.0636527	-0.126792	-0.170059	-0.0492516	0.0328816	0.0581189	-0.0849021	0.0910184	0.0728668	0.192316	0.0806686	0.0318573	-0.0501087	-0.0607533	0.013811	0.0230437	0.136151	0.116619	0.014842	0.175935	0.139063	0.0507165	-0.014611	0.211119	0.123925
ANGEL2	0.492746	-0.176153	-0.0225244	-0.0277328	-0.310798	-0.232538	-0.0255524	-0.0913211	-0.190231	0.398025	0.0104651	-0.231498	0.458794	0.393967	0.282728	-0.0968983	0.189178	0.217379	-0.0196787	0.141621	0.132833	-0.247161	-0.458011	-0.0884109	-0.111538	0.548959	0.313393	0.39484	0.24553	0.288092	0.158698	-0.269013	0.386587	0.17013	-0.151179	-0.0838893	0.265775	0.0310078	0.178561	-0.423723	-0.243872	0.17773	-0.0161317	-0.0885847	-0.0161064	-0.381561	0.227116	0.271777	0.352578
ANGPT1	0.200271	0.169851	-0.0711707	0.658769	0.231684	0.146966	-0.110469	-0.347858	0.385615	0.428552	0.4776	0.201732	0.257512	-0.399614	0.448042	0.537613	0.223829	0.35757	0.140653	1.11963	1.33765	0.902188	0.152702	0.318061	0.188014	0.615885	0.186242	-0.472513	-0.214703	0.066175	-0.0192794	1.35584	-0.204269	0.0486046	-0.0893003	0.214687	0.399593	-0.311167	0.257128	-0.0273987	-0.0714459	-0.264368	0.572185	0.730678	-0.0759027	-0.314721	-0.322366	-0.370353	-0.286424
ANGPT2	-0.0769839	-0.0535724	0.0167844	0.0700514	0.0382106	-0.0324483	-0.0914615	0.0361168	0.147795	-0.0939469	-0.0908305	0.0205496	-0.0629609	-0.0306767	-0.111448	0.0563251	-0.0473649	-0.0401743	-0.172097	-0.0666711	-0.144362	-0.0523557	-3.16e-05	0.0360623	0.0932424	0.215208	0.0871536	0.0364501	0.0140179	-0.066034	0.0382861	0.11726	-0.00955375	0.00533795	0.186413	0.0945427	-0.0609423	0.0366875	-0.0867569	0.0187936	-0.0502577	0.0582647	0.06947	-0.0551401	0.0248084	0.0763546	-0.132205	0.183863	0.0372893
ANGPT4	0.153227	0.398961	0.0575513	-0.027475	0.3753	-0.260675	0.0295148	0.606863	-0.0666168	0.731531	-0.0551124	0.282215	-0.368288	-0.568407	0.194014	0.321477	-0.185041	0.323328	-0.026714	0.206816	0.218696	0.584618	0.247103	-0.0294323	-0.249171	-0.320151	-0.491416	-0.173031	-0.434245	-0.384603	-0.189135	0.453844	0.00710337	0.485841	-0.270608	0.0394364	-0.155759	0.0829159	0.162439	0.743691	0.566339	-0.23061	0.0453113	-0.401102	0.0383694	0.0115514	0.354937	-0.120035	-0.181444
ANGPTL1	-0.0889447	0.179883	-0.0651974	0.154988	-0.129656	-0.0593694	-0.160614	-0.0360993	-0.0733382	0.014842	0.136192	-0.107017	-0.134002	-0.0880223	0.0547921	0.19657	-0.00627743	-0.0222614	-0.0987297	-0.188892	-0.187377	-0.0835318	0.0532704	-0.0408448	-0.0258771	-0.140168	-0.057888	0.0257921	-0.0725011	-0.145338	-0.125672	0.0472153	-0.00153717	-0.0892142	0.0734378	0.26099	-0.157245	-0.0558571	-0.00400975	-0.0627607	0.026805	-0.189873	-0.0925508	0.0223858	0.0636206	0.075427	-0.00392954	0.17436	-0.0935815
ANGPTL2	0.0900249	0.156037	0.168396	0.134241	0.137679	0.224813	-0.089515	0.00109965	0.162319	0.0581769	0.213976	0.145357	-0.247999	-0.0478152	-0.0840787	0.0300785	-0.18012	-0.0159814	0.0495733	-0.021474	-0.110439	-0.0816778	-0.0420182	-0.249922	0.0924991	0.00987035	-0.0869047	-0.0800826	-0.0396922	-0.097198	-0.267465	0.02378	0.161741	-0.168177	-0.101086	0.0720768	-0.0935815	0.0259181	-0.0391495	0.197491	0.0215489	0.0796906	-0.178227	-0.177118	-0.0607283	0.267874	0.0742598	-0.0246546	-0.079004
ANGPTL3	-0.0989004	-0.0160556	0.0742331	-0.108533	-0.0854113	-0.100513	-0.181971	-0.0163894	0.0232593	0.0515696	-0.013026	0.326278	-0.174287	-0.0321726	0.022207	0.16747	-0.0176882	-0.0280961	-0.138404	-0.0384008	-0.0223563	0.0970516	0.251757	-0.0479711	0.102657	-0.011423	-0.0622652	0.0510346	-0.162587	0.000819388	-0.074398	0.264705	-0.0153822	-0.101324	0.170283	0.019396	-0.0568598	0.150961	0.0861825	-0.10747	0.0442436	-0.081029	-0.126831	-0.106137	0.150195	0.0769172	0.0446506	-0.0393096	-0.0825894
ANGPTL4	-0.389599	-0.321302	-0.27982	-0.0557679	-0.247425	-0.333228	-0.164501	-0.144506	-0.262883	0.0830122	-0.317279	0.147644	-0.375917	-0.453027	0.235901	0.3972	-0.354623	-0.0933993	-0.194612	-0.373876	-0.429666	-0.0650239	0.328546	-0.0559827	0.247389	0.0645211	-0.171083	-0.282676	-0.174865	0.0286606	-0.046735	-0.00365671	0.333284	0.101196	0.0512111	0.296492	-0.0342298	-0.0634752	0.130076	-0.06387	0.226454	4.28e-05	-0.222272	0.0103651	0.0199452	-0.382083	-0.171586	0.182971	0.107517
ANGPTL6	0.0053083	-0.545171	0.233609	-0.0468158	-0.404589	-0.0298898	-0.279955	0.564772	0.014718	0.429988	-0.107406	0.51849	-0.245345	-0.281936	-0.186317	0.241601	-0.301059	0.0371662	0.138289	-0.080312	0.264289	0.256263	0.425776	-0.170818	0.11295	-0.129546	-0.533058	-0.617701	-0.483528	-0.0899045	-0.199526	0.0432401	0.00150059	-0.0582668	0.0973724	0.0844434	0.17897	-0.0958298	0.322962	-0.0158791	0.4617	-0.589172	0.184399	0.279271	-0.15068	-0.244372	0.350336	-0.161035	-0.0398137
ANGPTL7	-0.184697	0.0226415	0.0790711	-0.0518677	0.0307316	0.129103	-0.00345637	0.210325	0.252532	-0.0483927	-0.352844	0.138466	0.049873	-0.115532	-0.209816	0.167617	0.143936	0.0487192	0.103761	-0.376053	-0.401925	0.195782	0.189279	-0.000100289	0.237738	-0.330413	-0.304632	-0.232158	-0.305751	-0.00384704	-0.2471	0.0413937	-0.025982	0.226309	0.230646	0.00311771	-0.238522	0.12878	-0.129025	0.236761	0.122916	-0.0968432	-0.142488	-0.255098	-0.147441	-0.158486	-0.0477323	0.200328	-0.0429349
ANGPTL8	-0.670691	-0.572955	-0.133232	-0.231294	-0.373431	-0.47762	-0.380343	-0.142555	-0.100294	-0.214801	-0.585071	0.246808	-0.406407	-0.0219958	0.223882	0.0769525	-0.103269	-0.0192042	0.163146	0.147758	0.194742	0.0300584	-0.120808	-0.291409	-0.170581	-0.0606343	-0.000703817	-0.528272	0.00948062	-0.446637	-0.206795	0.00763551	0.42527	0.00960421	0.733038	0.143447	-0.187288	0.187349	0.173599	0.886157	0.0986833	-0.299495	0.174063	-0.00898254	-0.0804419	0.0546585	-0.00821534	0.324062	0.102915
ANHX	0.120264	-0.1731	-0.0202349	0.185348	0.174063	-0.0349526	-0.196369	0.340721	0.140907	0.212016	0.0348578	0.498258	-0.00874833	-0.273539	0.288878	0.299883	-0.303646	0.245324	-0.00887455	-0.0379392	-0.0928648	0.176208	0.0100695	0.0905757	-0.0490965	0.0251642	-0.275801	-0.0594497	-0.15024	0.156341	-0.144815	0.203302	0.107249	0.235934	0.352073	0.309619	-0.180287	-0.0289368	0.254526	0.21339	0.312386	0.0763546	-0.0908305	-0.0168681	0.00267234	0.00228447	-0.107047	-0.0502865	-0.0223766
ANK1	-0.602648	0.418384	0.368662	-0.506382	0.304148	-0.314807	0.0458791	0.311508	0.00492605	0.868062	-0.462836	0.321745	-0.5312	-0.210687	0.761069	1.12884	-0.335777	1.52748	-0.0145811	-0.22553	-0.381155	0.0019296	0.366869	0.179576	1.57397	0.836277	-0.0693959	0.191843	-0.461411	0.0759303	-0.10819	1.77352	1.17221	0.499451	-0.0773841	-0.182163	1.00272	1.29172	0.259	0.868062	1.48838	-0.541846	-0.385141	-0.206488	-0.0600119	-0.560689	-0.139141	-0.183256	-0.274571
ANK2	0.0158418	0.256194	-0.0603703	-0.116566	-0.0230382	0.0990327	0.0931062	0.111927	0.241837	0.15447	0.149312	0.184883	-0.0337898	-0.0978685	-0.112459	-0.0950257	-0.0752841	0.0045208	-0.0150434	0.0361692	-0.0106933	-0.0782998	0.19194	-0.160254	-0.0460405	0.047098	0.000115046	0.0606595	-0.131065	-0.0342298	-0.0855618	0.0436468	0.181705	0.173732	0.326655	0.0355026	-0.210687	-0.215685	-0.05876	0.0586479	0.0269392	0.0226946	0.030656	0.0925269	0.0747768	-0.0360227	0.0599733	0.0538582	0.00157264
ANK3	-0.0728447	-0.59019	0.0467893	0.00815391	0.414405	-0.391003	0.558175	0.0748787	0.182916	-0.129243	0.0172673	-0.0749964	-0.941876	0.152602	-0.450272	-0.296062	0.187349	0.503912	-0.0792557	0.698792	0.513729	0.436694	-0.200222	-0.00588769	-0.0398638	0.00421854	0.298635	1.43053	0.802956	0.654492	0.341224	-0.342666	0.0117772	-0.257556	-0.201053	-0.111999	-0.0814818	0.53344	-0.0408448	-0.0799573	-0.182686	0.252532	0.131868	0.184359	0.250895	-0.363185	0.817082	0.915899	0.415335
ANKAR	-0.127366	-0.135026	-0.0312713	0.0274819	0.051372	0.0720231	-0.156597	0.0443583	0.0439237	0.0438399	-0.0944387	0.0251642	-0.113409	0.0529578	-0.010807	0.31408	-0.0333105	0.123238	0.181531	-0.22771	0.00173172	0.0323627	-0.00387092	0.0230437	-0.0483011	-0.00879586	0.132833	-0.048829	0.0546053	-0.0956728	-0.234236	-0.00793562	0.0812251	-0.125808	0.0340323	0.0324791	-0.156461	-0.0378518	-0.121501	-0.0761072	0.190579	-0.136736	-0.161519	0.0509193	-0.0914325	0.253373	0.233768	-0.0503123	-0.00952869
ANKDD1A	-0.514491	-0.155727	-0.351044	0.0200546	-0.0197557	0.113917	0.121081	-0.258846	-0.086383	0.326081	-0.721801	0.049273	-0.349999	-0.554682	-0.726869	-0.537661	0.375398	0.792222	0.227793	-0.816762	-0.43286	-0.410948	-0.36619	-0.397997	-0.0662605	0.432024	-0.96746	-0.00153717	-0.523659	-0.699772	-0.685669	-0.0190574	-0.233496	-0.445409	-0.235876	-0.0442122	-0.172588	0.133384	-0.306374	-0.306774	-0.0734995	0.123383	-0.582428	-0.764485	-0.0876122	-0.0929876	0.497788	0.508255	0.131194
ANKEF1	0.12524	-0.228893	-0.280927	-0.140336	0.248847	-0.132615	0.182745	-0.0583294	0.0362726	0.207542	-0.106172	0.0349274	-0.046735	0.341965	0.0856866	-0.106263	-0.0982896	-0.10344	0.223491	0.244795	-0.0539407	0.283375	0.400684	-0.0340839	0.0934068	-0.0295086	-0.00824362	-0.0202772	0.267536	0.253508	0.337492	0.0850181	0.0468139	-0.0786813	0.590183	-0.216025	0.0716812	0.143936	-0.00783231	-0.0667205	-0.146876	0.347107	0.248898	0.0893161	-0.318877	-0.405313	0.0637193	0.0576844	0.114747
ANKFN1	0.130665	-0.0563001	-0.156858	0.112094	-0.155795	-0.0219958	0.0662953	0.11401	-0.0813955	-0.00805102	0.0219134	0.161984	0.131347	-0.200302	0.0238054	0.021861	0.00963154	-0.129383	-0.118674	-0.188721	-0.172659	-0.181096	0.0207363	-0.0138977	-0.0118016	-0.0798286	-0.101648	-0.0393372	-0.0504563	0.146361	0.0319718	-0.0303513	0.0309491	0.0487463	0.00356601	-0.00461475	-0.230201	-0.038345	-0.0986644	0.0335366	0.12577	0.0204484	-0.0482749	-0.259697	-0.062564	-0.145152	-0.00257881	0.028503	-0.0142451
ANKFY1	-0.0289811	-0.130893	-0.00173908	-0.118288	0.0402694	-0.0967857	-0.0745868	-0.0949739	-0.163208	-0.360973	0.0123129	-0.171708	-0.0949507	-0.0397872	-0.0877102	-0.135295	-0.132071	-0.179335	-0.10111	-0.186411	-0.41244	-0.117561	0.0298634	-0.155552	-0.181444	-0.134409	-0.0911349	-0.135263	-0.200302	-0.0142946	0.0251642	0.071716	0.0314389	-0.124167	-0.0309671	-0.228626	-0.246256	-0.0994798	-0.287075	0.165269	-0.0382452	-0.0129047	-0.19939	0.0448563	-0.0909666	0.140993	0.687798	0.415335	0.409167
ANKH	-0.0504563	-0.401604	-0.0528432	-0.180819	0.00463083	-0.0757572	0.0548466	-0.0101165	-0.165915	0.0707653	-0.0671317	6.45e-05	-0.176824	0.0935366	0.0556146	0.397692	-0.0486279	0.21096	0.102325	-0.00176633	-0.0759299	0.145797	0.0775965	-0.207079	0.300553	-0.101614	0.0424396	0.0166783	0.0980099	0.211613	0.0731767	0.242966	0.458043	0.0130849	-0.00567875	-0.0482749	0.0707349	0.116684	0.229143	-0.0419672	0.277448	0.157495	-0.109074	-0.0323717	-0.17992	-0.083472	0.391897	0.408274	0.372953
ANKHD1	0.122398	-0.202173	0.398961	0.342946	0.422255	0.333367	0.217271	-0.00565747	0.17095	-0.601109	0.127128	-0.280997	0.337885	0.339803	-0.183138	-0.472275	0.5673	-0.005153	0.34045	0.214412	0.0278751	-0.0533062	-0.560689	0.246339	-0.565462	-0.197743	0.00386588	0.31617	0.0668314	-0.0949237	0.276906	-0.179124	-0.494974	-0.506631	-0.173308	-0.539032	0.102626	-0.186157	-0.598376	-0.240828	-0.304324	0.0172408	0.117056	0.00356601	-0.364179	-0.144005	-0.0407689	0.166639	0.29486
ANKHD1-EIF4EBP3	0.063999	0.0161779	0.207542	0.322312	0.336925	0.388996	0.320276	-0.133666	0.210071	-0.384056	0.0165316	-0.0568303	0.58884	0.39229	0.20421	-0.18669	0.473999	0.0312552	0.377063	0.359434	0.175859	0.202264	-0.074788	0.199852	-0.130761	0.227171	0.206916	0.410853	0.164579	0.219904	0.234678	0.153875	-0.370471	-0.114086	0.00685605	-0.16114	0.206772	0.365264	-0.281401	0.109304	-0.245173	0.640017	0.470595	0.467081	-0.108123	0.0737813	-0.149546	-0.0559107	0.14338
ANKIB1	-0.0191509	-0.134131	-0.0226712	0.0250917	-0.29902	-0.0598259	0.0851108	-0.0661148	-0.237952	0.0467097	-0.081536	-0.124327	0.0336538	0.372487	-0.118841	-0.119318	0.243246	-0.0119931	0.181369	0.217055	0.290515	0.146259	-0.186721	0.0486947	-0.0768047	0.254381	0.298709	0.454048	0.152565	0.253912	0.313222	-0.0659534	0.0319718	0.0584624	-0.0566162	-0.174362	0.357897	0.161627	0.18578	-0.210808	-0.250992	0.171082	-0.0410883	0.184883	-0.0757235	-0.198025	0.540644	0.424013	0.470401
ANKLE1	0.141419	0.0626101	-0.143323	-0.140408	-0.209733	-0.0430681	-0.254701	-0.1101	-0.122799	-0.0299715	-0.268359	-0.0307679	-0.00221667	0.0158173	0.0173759	-0.0208625	0.0410606	0.0784964	0.0453113	-0.0634985	-0.0195778	0.022963	1.11141	-0.315292	0.215591	-0.179535	0.0178122	-0.0631519	0.0554833	0.277581	-0.0327722	-0.220453	-0.0568859	-0.0645439	0.0695922	0.157079	0.176429	0.295086	-0.409863	0.0233179	-0.163468	-0.116469	-0.395118	0.0838535	0.212016	0.0264083	0.212867	0.114402	-0.016412
ANKLE2	0.10758	0.128459	0.0662659	-0.0187067	0.0838204	0.0207363	-0.074788	-0.0338887	0.0739911	-0.196678	0.148226	0.0011192	0.362259	0.139063	-0.0573934	-0.249461	0.117734	-0.0535461	0.216539	-0.138239	0.0863071	-0.0719882	0.0040702	0.0238341	-0.213539	-0.0254558	0.178255	0.219469	0.174538	0.129819	0.134023	-0.0300144	-0.282011	-0.210949	0.0718294	-0.178705	0.0823448	-0.0261356	0.103534	-0.105589	-0.129694	0.146563	0.172219	0.204914	0.153645	0.0128074	-0.00476642	0.0993554	0.0518466
ANKMY1	-0.138438	-0.0300553	-0.0433804	0.00316434	-0.0285922	-0.0853238	-0.139469	-0.0561662	0.057959	-0.0970825	0.0605414	-0.0852341	-0.165361	0.0302477	-0.0399174	-0.111633	-0.180909	-0.107311	-0.0378518	-0.145005	0.0578965	0.430369	0.266114	-0.136469	0.153398	-0.096992	-0.0149448	0.0648596	-0.0799573	-0.0365829	-0.058998	0.0384232	0.0872947	0.0779619	0.103263	-0.0495009	-0.0156286	0.183912	-0.374248	-0.00188763	0.0266525	0.00876949	-0.162737	0.0848608	-0.0165537	-0.120116	0.0989981	0.0649496	0.15537
ANKMY2	0.361003	0.0626615	0.0145337	-0.226942	-0.635519	0.107429	0.284722	-0.127735	-0.185415	-0.179881	-0.219113	-0.115925	0.14904	0.11958	-0.313211	-0.290458	0.225636	0.170041	-0.307379	-0.0950257	0.196959	-0.265764	-0.0290263	-0.177171	-0.0775427	-0.0929876	0.587908	0.205858	0.389674	0.0629126	0.356248	-0.41719	-0.380754	-0.449396	-0.269533	-0.116231	0.383449	-0.10111	0.246808	-0.442851	-0.60884	0.0156407	0.41329	-0.272307	-0.436303	-1.06684	-0.28452	0.145844	0.0864903
ANKRA2	0.406427	-0.103994	-0.0791741	0.0378408	-0.216236	-0.106415	-0.0483927	-0.214226	-0.144325	0.439511	0.120232	-0.329348	0.379883	0.149999	-0.0218519	-0.0833792	0.251323	0.0196103	-0.137652	0.110251	0.352073	-0.0452972	-0.223272	-0.161177	-0.400488	0.288878	0.403626	0.324062	0.179114	0.440988	0.387777	-0.43818	-0.0243688	0.530094	-0.0202349	0.0350303	0.412098	0.204621	0.473999	-0.25465	-0.368153	0.239037	0.301153	0.276447	0.04376	-0.0497078	0.227915	-0.0588683	0.218799
ANKRD1	0.350764	-0.0656564	-0.320073	0.192996	-0.0600119	-0.212038	0.150921	-0.0330707	0.0374814	-0.197077	-0.171868	0.0182062	0.207065	-0.0884916	0.0670203	0.00384291	-0.295037	0.0624382	0.276966	-0.106612	-0.340973	-0.0764173	-0.105898	-0.139603	-0.09006	0.0443334	0.0393252	0.0932065	0.0494631	-0.0896325	0.0568775	0.181369	-0.110159	-0.208964	0.561034	0.320943	-0.215035	0.18899	0.0291397	-0.0862597	0.0366065	-0.0616782	-0.0915182	-0.140932	-0.243453	0.11401	0.0576027	0.353292	-0.0806921
ANKRD10	-0.177294	-0.0747144	-0.0937794	0.01354	-0.0990476	-0.00365671	-0.0566712	-0.000381883	-0.117795	-0.110576	-0.175092	-0.220585	0.225735	0.257825	-0.402076	-0.23764	0.0641094	-0.20472	-0.115562	-0.0428809	-0.0391208	0.0857471	-0.190231	0.113617	-0.0782666	-0.0564272	0.252646	0.252771	0.198806	0.198282	0.130449	-0.104502	-0.202709	-0.194176	-0.025899	-0.4351	0.154083	0.190372	0.272279	-0.146951	-0.178705	0.135504	0.0600598	0.0509777	-0.262818	-0.195931	0.329467	0.349947	0.318521
ANKRD10-IT1	0.0496748	-0.360863	-0.24202	0.433436	0.193727	0.265529	0.244795	-0.242735	0.508768	-0.165874	0.0562441	-0.180084	0.310889	0.264983	-0.386218	-0.410559	0.203666	-0.374738	0.188883	0.167658	0.0406691	0.22064	-0.193401	0.159869	-0.654542	-0.27193	0.166307	0.0139916	0.224859	-0.00667288	-0.00267986	-0.0673378	-0.389222	-0.162026	-0.349999	-0.617701	-0.189097	-0.0698676	-0.408554	-0.122438	-0.399614	0.156341	0.0542662	0.0272941	-0.295368	-0.294569	0.238426	0.0360002	0.207598
ANKRD11	-0.123416	-0.172097	0.124775	0.175895	-0.0207419	-0.0068719	-0.0490726	-0.28715	0.0416985	-0.20495	-0.174975	-0.128619	0.0268355	0.231296	0.0370764	-0.119467	0.207273	-0.188472	0.0933387	-0.00474189	-0.0615484	0.0617571	0.143447	0.39421	-0.000802176	0.246867	0.224348	0.206163	0.156177	0.216539	0.129103	0.164092	-0.141202	-0.230714	0.0138655	-0.110019	0.123646	0.358209	-0.258782	-0.0337639	-0.117677	0.35757	0.16906	0.29486	-0.214279	-0.132984	-0.149748	0.194354	0.128595
ANKRD12	0.236024	0.182421	0.376393	0.558919	-0.305258	0.114158	0.352578	-0.0864456	0.325903	0.692244	0.337296	-0.118841	0.321226	0.281415	0.0428428	-0.0309897	0.5871	-0.0859228	0.147866	0.290926	0.0871536	0.133697	-0.244215	0.172014	-0.0506463	0.380005	0.628422	0.234461	0.61533	0.708258	0.308695	-0.218326	-0.100929	0.0376483	-0.152716	0.114531	0.520369	0.00752999	0.351876	-0.420735	-0.328877	0.104544	0.364195	0.023971	-0.234345	-0.143789	-0.140133	0.0597878	0.283438
ANKRD13A	-0.291266	0.0865499	0.237624	0.193188	0.140577	0.349158	0.130766	-0.28872	0.257927	-0.482171	-0.205517	-0.346085	0.227915	0.10094	-0.0330707	-0.400634	0.417806	-0.341526	-0.313352	-0.204864	-0.038842	-0.126291	-0.231616	0.13754	-0.0824111	0.1088	-0.236572	-0.011573	-0.11899	-0.146876	-0.111084	0.0502067	-0.382083	-0.371689	-0.699772	-0.188553	-0.443047	-0.0431223	-0.356397	0.290054	-0.374738	0.0160199	0.295002	0.34772	-0.332004	-0.0866151	-0.351351	-0.202842	-0.377376
ANKRD13B	-0.844768	-0.0963304	-0.446311	-0.555844	-0.421552	-0.636861	-0.441355	0.0318573	-0.0117775	0.130519	-0.185135	0.0133862	-0.357281	-0.340687	0.265529	0.391226	0.0163027	-0.214703	-0.0846207	-0.0831549	-0.225112	0.148571	0.0456954	-0.264747	0.0146951	0.393452	-0.14397	-0.206884	-0.0182309	-0.126605	-0.0474948	0.275117	-0.0945218	-0.162379	0.332156	-0.0850256	-0.0959324	0.168602	0.255703	0.345002	0.0726697	-0.179002	-0.305751	-0.471793	0.130929	0.277033	-0.260323	0.0986833	-0.153884
ANKRD13C	0.0991044	0.0171847	-0.0237945	-0.215035	-0.240725	0.00879284	0.0144021	0.0145337	-0.202885	0.286066	0.151825	-0.361933	0.0355266	0.441294	-0.187118	-0.215252	0.570064	0.131901	0.101288	0.41354	0.41597	-0.24872	-0.33397	-0.256141	-0.31695	0.294365	0.516769	0.400279	0.416116	0.365861	0.504385	-0.377144	0.0772035	0.00940624	-0.0917836	-0.212524	0.445707	0.125095	0.212903	-0.411886	-0.107696	0.112983	0.229101	-0.106983	-0.286424	-0.466049	0.252959	0.250895	0.395911
ANKRD13D	-0.164577	-0.332554	-0.00113329	0.322227	0.0234343	0.10839	-0.0309671	-0.474684	0.0638109	-0.51553	-0.209952	-0.286091	0.242789	0.170084	-0.170409	-0.132104	0.293898	0.0397734	-0.0186305	-0.266149	-0.359601	-0.219113	0.129819	0.264572	-0.00403719	0.0856532	0.0326683	-0.0669262	-0.19939	-0.276966	0.0292411	-0.00194183	-0.368978	-0.419578	-0.269391	-0.208525	-0.26256	-0.0979249	-0.319436	-0.212197	-0.301601	0.192996	-0.09902	-0.0513062	-0.319436	-0.0612018	-0.532372	-0.0139947	-0.426852
ANKRD16	0.0336332	-0.0127431	-0.494271	-0.304324	0.314916	0.0861825	-0.0627935	0.111416	-0.157843	-0.231347	0.326187	-0.136272	-0.0957417	0.137648	-0.10654	-0.159157	0.104397	0.0500648	0.44336	-0.0346702	0.129166	0.399764	-0.110506	-0.34353	-0.293519	-0.462174	0.0344935	-0.0215054	0.312552	0.132082	0.0878342	0.628422	0.0484181	0.0529068	0.0615762	-0.0370009	-0.217441	0.140653	0.169095	-0.0722506	0.109365	0.040413	-0.0318836	0.321226	0.127564	0.111318	-0.143257	-0.198025	-0.148296
ANKRD17	0.317051	0.117807	0.241731	0.235318	0.240872	0.314498	0.18444	-0.0465717	0.108907	-0.171045	0.131868	-0.132381	0.19323	0.310889	0.0896086	-0.178867	0.359096	0.0355266	0.258061	0.236073	0.304721	0.0946391	-0.0974977	0.0144758	0.00135122	0.181238	0.152359	0.350047	0.17217	0.432544	0.338994	0.00856687	-0.0499082	0.434734	-0.114196	-0.218699	0.313643	0.327753	-0.0952032	0.118615	-0.163353	0.336451	0.330434	0.4234	-0.0942264	0.0794035	0.172393	0.183283	0.27617
ANKRD18A	-0.0431223	0.150564	-0.0796371	0.0655496	0.042592	0.141075	0.0667152	0.179024	0.0930739	-0.0961214	0.0898777	-0.0114979	0.118516	-0.0725497	-0.113069	-0.110288	-0.0403749	-0.116499	-0.0744723	-0.0914615	0.0824447	-0.178113	0.218105	-0.140575	-0.000703817	0.131194	0.100307	0.116512	-0.0753078	0.0859673	0.0115997	-0.0161064	-0.0986094	-0.0553034	0.0750899	-0.0608362	-0.0320118	-0.00496067	-0.00425305	-0.135753	-0.0757572	-0.0464121	0.12188	-0.126165	0.158698	-0.19074	0.21897	0.0396383	0.0608172
ANKRD18B	-0.0051748	0.0335366	-0.158896	0.59801	0.0647793	0.492746	-0.00276031	0.285146	0.623696	0.304351	-0.0760161	-0.0346702	-0.0982896	-0.0590271	0.0841635	-0.0604733	0.0724491	0.0125643	0.0488309	-0.0180521	-0.332649	0.230592	0.648535	0.0981388	-0.0814258	-0.205756	0.116658	-0.304711	-0.375682	-0.201234	0.154509	0.283438	0.356136	-0.0801665	-0.0538332	0.544605	0.134827	-0.175696	0.313051	0.150644	-0.138305	-0.0249607	-0.142555	0.625644	-0.195931	0.0579265	-0.0534636	0.0384232	0.186772
ANKRD19P	-0.255098	-0.637478	-0.0910523	-0.0162551	-0.0213405	-0.268553	-0.0736634	0.0535632	0.0973724	-0.144206	-0.105684	0.334145	-0.22788	-0.482373	0.0618415	0.139992	0.0232854	0.0126204	-0.0814818	-0.111711	-0.352419	-0.325786	0.334588	-0.101298	-0.0544693	0.240995	-0.16383	-0.031167	-0.130893	0.0137134	-0.217211	-0.274763	-0.206391	-0.020141	-0.107899	-0.331522	-0.554682	-0.336103	0.0793112	-0.179002	-0.132919	-0.194176	-0.14068	0.117905	-0.2274	-0.266086	-0.125105	0.197217	-0.0472677
ANKRD2	-0.0643191	-0.171231	0.0358413	-0.20824	-0.269587	-0.457202	-0.583834	-0.104235	-0.204999	-0.227203	-0.273266	0.143527	-0.264299	-0.360357	0.159741	0.557475	-0.655062	-0.0101965	-0.385262	0.020602	-0.0218251	-0.288852	0.632551	0.171665	0.17095	-0.227203	0.0219387	-0.254381	-0.484971	0.090668	-0.305579	0.195314	0.577136	0.0198974	-0.123794	0.128014	-0.0504255	0.137281	-0.399015	0.105696	0.188649	-0.0631519	-0.124792	-0.25781	0.420811	-0.281537	0.0740814	0.153674	-0.265422
ANKRD20A1	-0.233929	-0.225785	0.346685	-0.194706	-0.0869651	-0.19651	-0.263753	-0.071558	-0.214983	-0.00247692	-0.377034	0.165099	-0.23723	-0.0768047	0.0667496	0.0850503	0.141697	-0.19028	-0.211084	-0.181522	-0.0700035	-0.108481	-0.297577	0.0106174	-0.013026	0.209041	-0.0206952	-0.142919	-0.00082807	0.132722	-0.044244	-0.0413439	0.146149	0.331395	-0.00723256	0.211779	-0.139712	0.107958	-0.135197	-0.0179431	0.286137	-0.130537	-0.169057	0.0812568	0.313128	-0.106137	-0.0849732	0.0505093	0.0592759
ANKRD20A11P	0.00698266	-0.212524	0.0133594	-0.0472927	0.479727	0.628828	-0.305496	0.115939	0.235059	-0.0193307	0.000332443	-0.283767	0.18899	0.284799	0.00150059	0.403885	-0.909088	-0.385523	0.199261	-0.00254589	-0.108016	-0.433376	1.41284	-0.500396	0.43017	0.616351	-0.0347187	-0.168093	0.26774	0.0744317	0.119965	0.00662326	0.167207	0.336925	0.219669	0.580192	0.120232	0.81154	-0.258362	0.0333898	-0.0874643	-0.238522	-0.333329	-0.231053	-0.32278	0.541474	-0.312636	-0.523255	-0.273974
ANKRD20A12P	0.2586	0.0272449	-0.0189277	0.389931	0.344736	0.0960358	0.0689743	0.0617864	-0.0621403	0.23381	0.220335	0.129926	-0.209952	0.0522909	0.110067	0.0956889	-0.0418704	0.0624946	0.269872	0.190326	-0.0182762	-0.0970494	0.206421	-0.162701	-0.16018	-0.128013	-0.293064	-0.164883	-0.23764	-0.117893	-0.258537	0.40205	0.362058	0.403885	0.0634629	-0.210987	-0.0638129	-0.308663	-0.0827192	0.0616706	0.130868	-0.380606	-0.00179276	-0.169123	0.156875	0.145642	0.0177153	-0.155581	-0.200266
ANKRD20A5P	-0.0648341	-0.243872	-0.217441	0.257456	0.138013	-0.130019	0.0569803	0.041921	-0.0520915	0.34328	0.584618	0.131609	0.649886	0.198611	0.493674	0.0252816	0.217722	-0.218985	0.108296	-0.26563	0.00472881	0.325903	0.0714781	0.0088844	-0.0556327	0.178698	-0.0534906	0.4004	0.0487463	0.185167	-0.0575522	0.237862	-0.137399	-0.225059	0.000137648	0.515028	-0.515023	0.0297285	0.400049	-0.00196882	0.301153	0.103323	0.428723	0.244906	0.175686	0.0309842	0.444216	0.0875911	-0.0634752
ANKRD22	-1.30362	0.624178	0.158944	-0.451817	-0.760775	-1.07697	-0.841214	-0.532114	-1.45757	-0.759581	-0.202376	-1.17474	-0.424392	-1.27678	-0.769867	-0.507159	-0.364314	-0.582015	-1.31595	-0.857765	-0.760775	-1.14372	-1.19167	-0.421552	-1.66259	-1.28974	-1.4151	-0.59678	-1.2094	-0.83054	0.0280981	-0.48649	-0.529323	-0.899411	-0.79761	-0.986954	-1.02473	-0.574168	-1.4151	1.36624	-0.96746	-1.2094	-1.1824	-0.79294	-0.790377	-0.909088	1.16389	0.542968	1.40372
ANKRD23	0.0512111	-0.0689653	0.264224	-0.0339166	0.0523685	-0.0545748	0.0606295	0.182465	-0.0783268	0.00533795	0.188793	0.031917	0.00987035	-0.0963304	-0.177978	0.0857139	-0.202709	0.240574	-0.148139	0.0622557	-0.14054	-0.0787365	0.164835	-0.126263	0.207382	-0.329348	-0.0183604	0.00752999	-0.057523	0.0712631	-0.122469	-0.0543067	0.0360002	0.0581189	0.130189	0.0523989	0.0400245	-0.219481	0.0227169	0.0153829	0.0308966	0.0446743	0.00439734	0.00715442	0.182565	-0.204309	-0.0929284	-0.0666711	-0.0553782
ANKRD24	-0.370868	-0.0726452	0.083533	-0.0704905	-0.328127	-0.289385	-0.201715	-0.0435695	0.0667496	0.236991	-0.260439	-0.0519431	0.0128356	-0.23837	0.310728	0.148117	-0.185781	-0.133838	-0.40241	0.0434331	-0.0566712	0.0792554	0.350961	-0.104963	0.363128	0.033018	-0.178021	-0.239922	-0.157245	0.0633448	-0.20013	-0.0775427	0.307399	0.17507	0.308764	0.0718848	0.0746804	0.0213159	0.0457269	0.222115	0.121739	-0.156818	-0.145376	-0.211178	0.0308378	-0.104738	0.178655	0.146451	0.154554
ANKRD26	-0.000406471	0.0649496	0.103693	0.278266	0.351876	0.0934383	-0.0253528	0.0996646	0.0843136	0.286447	0.47806	-0.099425	-0.200222	0.167392	-0.0447574	-0.104114	-0.150279	-0.0600119	0.231628	0.0275981	0.205709	-0.0367527	-0.0530044	-0.142345	-0.255337	0.259559	0.131347	-0.0241446	-0.0382452	0.254185	0.0184836	-0.123727	-0.366085	0.0602696	-0.123448	0.22332	0.196233	-0.0360227	0.167345	-0.147828	0.196864	-0.107635	-0.196765	-0.0602472	-0.0422691	-0.190655	0.039358	0.1741	0.176971
ANKRD26P3	0.194408	0.313051	0.180223	-0.171121	0.140758	0.258466	0.338691	0.705177	0.24824	0.405258	0.0167547	0.352274	0.0378408	-0.0472927	0.183735	0.219562	-0.160956	0.193621	0.229101	0.360549	0.177931	0.212771	-0.0178936	-0.0485257	-0.293448	0.00280554	-0.124792	0.0557417	0.0245258	-0.468231	-0.464887	0.892138	-0.286844	-0.0333651	0.196414	-0.251478	0.0321189	-0.625481	-0.179499	0.0404958	0.0758375	-0.0514937	0.576403	-0.23061	0.0673081	-0.0685008	0.245787	-0.271064	-0.0403512
ANKRD27	0.48018	0.0104165	0.15297	0.127936	0.105291	0.0249646	0.449504	-0.157169	0.0626949	-0.224399	0.231167	-0.267153	0.466038	0.605752	0.363589	-0.354729	0.548635	-0.0312437	0.3753	0.336644	0.210429	0.130189	-0.299627	0.47512	-0.303053	0.250494	0.468803	1.05204	0.580548	0.255812	0.52651	0.48041	-0.310466	-0.0246796	-0.00392954	-0.437228	0.470595	0.319243	0.427544	-0.240342	-0.248377	0.415	0.470196	0.560331	0.163361	0.409846	-0.435935	-0.205943	-0.435591
ANKRD28	-0.158824	0.48318	0.184659	-0.0949507	-0.337597	-0.258424	0.344328	-0.10714	0.121628	0.337885	-0.0194094	-0.0610755	-0.0382675	0.216264	-0.0261356	0.167207	0.146756	-0.272252	0.215019	0.083757	0.123865	0.252148	-0.240616	0.542968	0.340165	-0.0735756	0.556778	0.36177	0.302817	0.230179	0.222385	-0.366406	-0.0408717	-0.325516	-0.360253	0.042288	0.610011	-0.0125909	0.678782	-0.17421	-0.122345	-0.152235	0.00772753	-0.263487	-0.222164	-0.128846	-0.225622	-0.186565	0.0102607
ANKRD29	0.0393856	0.00791021	0.0380524	0.0121214	-0.112748	0.0600893	0.0936018	-0.0277756	-0.0824752	0.109613	0.118753	0.102498	-0.0570136	0.030106	0.0542662	-0.0450343	-0.074788	-0.14393	-0.115532	0.0998563	-0.0489076	-0.135604	0.0260441	-0.120017	-0.182927	-0.0592967	0.0985833	0.0514247	-0.057738	-0.230362	-0.104144	-0.0286158	-0.0433109	0.220974	0.342351	-0.0606836	-0.0943197	-0.328295	0.0138655	-0.138549	-0.0412142	-0.0221663	0.186919	0.0640505	0.0138882	-0.0346702	0.00885745	-0.094997	-0.0596624
ANKRD30A	-0.0873981	0.500989	0.799519	-0.115992	0.235838	0.179275	0.320186	-0.0643773	0.185994	0.315406	0.0388149	-0.113503	-0.1101	-0.206884	-0.168016	0.17364	-0.0619751	-0.10987	-0.223323	0.0698669	-0.0100175	0.561034	0.392414	-0.154645	0.0607253	0.0257106	-0.150031	-0.420451	-0.0756554	-0.0851742	-0.214568	-0.0917836	-0.101876	0.130562	0.0372156	-0.0881697	-0.0974376	0.0616352	-0.0142451	0.248728	0.064457	-0.15254	0.118516	0.383577	0.0678095	0.0191811	-0.10993	-0.172413	0.0107715
ANKRD30B	-0.0499585	-0.0650239	-0.257896	0.00968211	-0.146657	-0.081536	-0.114474	-0.166998	-0.0483245	0.101415	-0.0763896	0.074374	-0.202981	-0.040203	0.396537	0.0338494	0.00772753	-0.0902246	0.107183	-0.0478689	0.117291	0.025606	0.309619	-0.0551621	-0.0935225	0.464799	-0.0273987	0.00562157	0.0167547	0.00755703	-0.106914	0.0892539	-0.115252	0.178524	0.319318	0.0301568	-0.135636	0.108357	-0.179842	-0.0566712	-0.0749718	-0.114806	0.222115	0.105938	0.150528	-0.19939	-0.00265447	-0.104361	-0.0604004
ANKRD30BP2	-0.099425	0.562665	-0.340687	0.0561072	0.126823	0.160678	-0.0928118	0.0455024	-0.0983591	-0.125569	0.172122	-0.0437224	-0.0591362	-0.0869395	0.838669	-0.141915	0.0531923	-0.0561884	0.554774	0.110344	0.180816	0.267125	0.0310078	-0.0920729	-0.169978	-0.100666	-0.155308	-0.294569	0.0518767	-0.284815	0.0550164	0.0930007	0.0480358	0.0344935	-0.121694	-0.13167	-0.158749	-0.144432	-0.100543	-0.0369727	0.0669867	-0.446475	0.198337	0.310807	0.0917689	0.124535	-0.00730837	-0.0237456	-0.0450031
ANKRD30BP3	0.0124893	0.0200546	-0.0462568	-0.110074	0.0796906	-0.0551124	-0.0234575	0.128964	0.431043	0.126455	0.28726	0.019564	-0.0154105	-0.0122441	0.0401326	-0.0441876	0.132294	-0.141988	-0.067209	0.0994527	-0.0325261	0.186772	0.136897	0.0195834	0.0338494	-0.0970825	-0.00201322	-0.0735756	-0.118069	-0.120084	-0.184816	0.08949	0.419279	0.0827534	0.0118797	0.0439506	-0.12331	-0.0209888	-0.0604445	-0.0142946	-0.016631	-0.0561884	0.0185549	-0.0566954	0.131157	0.24045	0.216264	-0.172509	0.0657795
ANKRD31	0.500989	0.272348	0.128521	0.260682	0.210429	0.108421	0.253562	0.59087	0.0140433	0.285924	0.399468	0.979779	-0.014551	-0.113794	0.303328	0.266911	0.0718294	0.319318	0.00107003	0.0198974	0.291355	0.410429	0.000382752	-0.0555842	-0.355217	0.289231	-0.0371316	-0.234592	0.00618174	0.241237	0.0822605	0.325903	0.222884	-0.0605224	0.953579	0.00845755	-0.40685	-0.0751963	-0.0690986	-0.015244	0.0180109	-0.0207645	0.0903085	0.257766	-0.208376	0.379883	-0.108249	-0.23747	-0.162848
ANKRD33	-0.0933754	0.317551	0.0942492	0.194965	-0.313275	-0.230105	-0.0268792	-0.20509	0.00770586	-0.221776	-0.17421	0.0845078	0.00159489	0.0197154	0.178486	0.215375	-0.0389645	-0.445694	0.115184	-0.214568	0.145277	-0.0892142	0.141893	0.0552834	0.224612	-0.0928118	0.0243364	0.0762135	-0.0110577	-0.246479	-0.0914909	0.112682	0.149887	-0.398153	0.698792	0.103008	0.0505353	0.17364	0.0607253	-0.149119	0.047732	-0.0774902	-0.318046	-0.246367	0.158567	-0.321491	0.011721	-0.00936112	0.134872
ANKRD33B	-0.226093	-0.0238187	-0.151179	-0.2246	-0.132514	-0.166182	-0.0769323	-0.233395	0.0314684	-0.365699	-0.136537	0.0220429	-0.082506	-0.077703	0.203356	0.0909866	0.0813415	-0.246877	-0.127268	-0.349672	-0.406712	-0.144287	-0.269656	-0.233869	0.274377	-0.0761072	-0.124962	-0.124641	-0.0808834	0.00968211	-0.324087	-0.290228	-0.14054	0.111194	-0.529949	-0.420877	-0.170426	-0.524543	-0.136566	0.529144	-0.270161	-0.0813683	-0.0838589	-0.179376	-0.452453	-0.367801	0.121661	0.00940624	0.585533
ANKRD34A	0.299009	0.041921	0.0279903	-0.0684197	-0.0193307	-0.0609965	-0.208376	0.30513	0.1082	0.466574	-0.210652	0.324378	0.0462261	-0.0612894	0.0414437	0.00823297	-0.487909	0.951344	0.203405	-0.208567	-0.248942	0.167081	-0.086383	-0.0917836	0.216781	0.202307	-0.396938	-0.221957	0.143276	-0.114771	0.0652372	0.346368	0.152275	-0.18843	0.14338	0.163765	-0.204673	0.150528	0.536368	0.118373	0.0261746	-0.212963	0.255507	-0.249052	0.388874	0.172952	0.108296	-0.0405585	-0.398395
ANKRD34C	0.0252547	0.219326	0.0665785	-0.116204	-0.00851006	0.010822	-0.0126945	0.499652	0.0835903	0.11278	0.0780785	0.310553	0.0794975	-0.21548	-0.113214	0.0713586	-0.0357093	0.294125	-0.196012	-0.037963	-0.237128	-0.165717	0.387005	-0.519166	-0.114835	-0.43683	0.0824835	-0.0186032	-0.00627743	-0.0573698	0.073966	-0.170203	0.115184	-0.300433	-0.270459	0.0161205	-0.412045	0.0658678	-0.200825	-0.123794	0.0518466	-0.362621	0.0122074	0.046127	-0.00544807	0.0902796	0.317461	0.145002	0.0365578
ANKRD35	0.00630886	-0.133232	0.0171643	0.414854	-0.132176	-0.209816	-0.255	-0.0067796	0.239848	-0.180543	-0.18962	-0.0984513	0.17971	-0.684076	0.13772	0.189685	-0.402563	0.202307	-0.292361	-0.421394	-0.0146392	0.244416	-0.0652543	0.0189478	0.618319	-0.388404	-0.247672	0.127677	0.171404	0.0222848	0.0448292	0.315317	-0.233869	0.2143	0.37818	0.261254	-0.121088	0.57941	-0.0842883	-0.0952032	0.21897	-0.490963	-0.442615	0.300215	-0.133533	-0.208197	-0.0896033	0.47539	-0.298879
ANKRD36	0.759834	0.0513434	0.0673875	0.476298	0.476757	0.71186	0.538926	-0.0359727	0.366523	0.827196	0.00825698	-0.0764173	-0.00977601	0.758824	0.196509	0.057815	1.20095	0.342351	0.61533	0.967365	0.682158	0.497059	-0.301518	0.280402	-0.0971399	0.110445	0.687798	0.833633	0.36855	0.587908	0.285071	0.187611	-0.108598	-0.187414	-0.286844	-0.00387092	0.596236	0.649367	0.133314	-0.221109	-0.232765	0.192316	0.447475	0.316509	0.371392	-0.695648	0.235215	0.184578	0.231917
ANKRD36B	0.289837	-0.146775	0.385276	1.17221	-0.0108587	0.907588	1.06706	0.266636	0.348374	0.798539	0.258197	-0.202119	0.111004	1.22413	-0.0827498	-0.0610447	0.839971	0.778292	0.398811	0.920713	0.654492	1.47671	-0.134131	0.409421	0.0209223	0.0217741	1.2718	1.17221	1.43053	0.930399	0.522123	0.868062	0.0400548	0.151825	0.123721	0.00394737	0.670184	0.887876	0.69008	-0.341434	-0.390366	0.841375	0.920713	1.48838	0.439709	-0.752562	-0.425556	-0.227442	0.152602
ANKRD36BP2	1.12377	0.155159	-0.121561	-0.0481106	0.196193	0.255507	0.863746	0.318663	0.184399	-0.191366	0.124418	-0.143632	-0.0378518	0.682158	-0.0294839	0.0386937	-0.071194	-0.132344	0.0887412	-0.0134821	-0.0771215	0.236528	-0.251525	-0.0614431	-0.0202114	-0.57567	0.0829806	0.456622	0.135401	0.129385	-0.0221359	-0.0994798	0.681402	-0.0760664	0.139759	-0.00882459	0.104397	0.364195	-0.102708	0.0371662	-0.0401155	-0.17421	0.134942	0.0128904	0.199761	0.117843	0.0667765	-0.0905216	-0.0420479
ANKRD36C	0.315406	-0.188097	0.15327	0.151137	-0.0814258	0.230045	-0.217441	-0.00588769	0.0812251	0.295475	0.117734	0.079907	-0.0464647	-0.586516	-0.0737508	-0.0300144	-0.0648924	0.145077	0.637521	0.0448069	-0.00330649	0.111519	0.475903	-0.0697883	0.157337	0.0107497	0.205112	0.58601	0.0150981	-0.115697	0.0766103	1.00272	0.0756257	-0.205641	0.884589	-0.00213754	0.001852	0.075115	0.0227647	-0.170581	0.0811927	-0.260262	-0.299562	-0.220226	-0.0411381	0.264361	0.0550728	-0.0717913	-0.350828
ANKRD37	-0.229683	0.0311177	0.120172	-0.473625	-0.264106	-0.311639	-0.164844	-0.414408	-0.336514	-0.0426135	-0.261117	-0.197033	-0.506124	0.0878024	-0.0922312	-0.105867	-0.141726	0.165405	-0.370037	-0.158064	0.322312	0.208521	-0.0420714	0.000574309	0.297154	-0.132071	0.0436171	-0.219274	0.00331036	-0.170059	-0.164319	-0.0854699	0.139677	-0.461014	-0.171629	-0.100046	0.0546053	0.0805574	0.0849896	0.377934	-0.0250608	-0.270543	0.106277	-0.129484	-0.278274	-0.221327	0.650439	1.03238	0.685457
ANKRD39	-0.199037	-0.311553	0.0581462	-0.169096	-0.0915729	-0.228019	-0.0233541	-0.386833	-0.0920729	-0.210095	-0.0578363	-0.575165	-0.511902	0.265218	-0.23004	-0.112566	0.0304031	0.327416	0.0884041	-0.347657	0.110728	0.0801649	0.107762	-0.15995	0.0249906	-0.126926	0.405987	-0.226942	0.285704	-0.381011	0.340165	0.0768537	0.242522	-0.150778	-0.223891	-0.195931	0.0241113	0.204719	-0.0308954	0.0648054	-0.1118	-0.327751	-0.149853	0.0411789	-0.449214	0.0180377	-0.253094	-0.0161839	-0.354526
ANKRD40	0.227344	0.0428428	-0.196798	-0.105439	0.11278	0.0358674	0.0869814	0.0465717	-0.184657	-0.180158	0.0578438	0.0147412	0.0336332	0.198337	0.0972138	-0.158149	0.108064	-0.0383182	0.1855	0.00952736	0.020579	0.12007	-0.126926	-0.0599127	-0.0307149	0.325903	0.138754	0.231357	0.240077	0.344223	0.235632	-0.0865051	0.0503405	0.095542	0.010822	-0.130926	0.0829159	0.084542	-0.162812	-0.0477896	-0.00252632	0.185028	0.0689743	0.10379	-0.21544	0.157337	-0.0264245	-0.100079	0.17095
ANKRD40CL	-0.181775	0.342135	-0.035686	0.169811	0.0878342	0.21659	-0.0458463	-0.120808	0.113032	0.171834	0.123893	0.0552204	-0.0601225	-0.0422178	-0.300141	-0.135063	-0.081889	0.00107003	-0.0817074	-0.28474	0.173694	-0.0270025	0.127564	-0.115472	-0.104174	-0.0796881	0.105132	0.224119	0.103849	-0.365596	0.181194	-0.0187067	-0.207611	0.03973	0.580192	0.088377	-0.181363	-0.496036	-0.399345	-0.309921	-0.109809	0.125958	-0.00469145	0.0710264	-0.120376	0.0244804	0.0758981	-0.105104	0.0811927
ANKRD42	-0.391003	0.00604102	-0.449627	0.242908	-0.651157	0.720052	0.984956	0.00646879	-0.34171	-0.553973	0.126352	-0.49547	0.394417	1.9076	0.0283528	-0.105802	0.341965	1.06706	0.332899	0.193375	0.574413	0.751167	-0.306923	0.683543	-0.167765	-0.306221	-0.117539	1.59083	-0.0647304	0.0928538	0.554115	-0.547395	-0.419102	-1.00672	-0.463204	-0.0387455	0.450921	1.03238	-0.234655	-0.344654	-0.00576165	0.497544	-0.708366	-0.615492	-0.461212	0.252646	0.278607	0.336451	0.0574915
ANKRD44	-0.0839226	0.270899	0.283488	0.540644	0.0968071	0.470595	0.177931	0.0180578	0.119362	-0.0852611	-0.11429	-0.161928	0.770506	0.292954	0.0725444	-0.169619	0.613049	0.0502824	0.00159489	0.108684	0.182515	0.307312	-0.26647	0.198942	-0.253151	0.250962	0.137318	0.195457	0.164783	0.351052	0.106994	0.106544	-0.27877	-0.148107	-0.186361	0.129134	0.0881899	0.398961	0.0173225	0.0216442	-0.189873	0.159023	0.328106	0.424677	0.0846317	0.0272449	-0.115824	-0.0239386	0.0042456
ANKRD44-IT1	0.141499	0.00968211	0.431497	0.109973	0.142622	0.936773	0.00803579	-0.145037	1.00272	-0.181397	0.0831005	-0.161256	0.102876	0.220601	-0.190112	-0.70069	0.71045	0.0742034	-0.00413011	0.220805	-0.0392537	-0.0411645	-0.190112	0.60774	-0.051179	-0.115411	0.132975	0.315063	0.00521267	0.355048	0.00135122	0.182288	-0.0167502	-0.266215	-0.411886	-0.505885	0.249891	0.0493003	-0.492731	0.189418	-0.119467	0.0732039	0.16747	-0.378579	-0.265083	-0.0283219	0.283228	-0.0043961	0.161458
ANKRD45	-0.175128	-0.296376	0.00559507	0.114261	-0.0753328	-0.208525	-0.261117	0.0505643	0.0286369	-0.0904648	-0.114835	0.154626	-0.111999	-0.152276	0.0455837	0.422255	-0.181151	0.0351132	-0.155453	0.0313381	-0.11576	0.13715	-0.0547426	-0.160503	0.319243	0.253912	0.0307827	-0.216706	-0.0476332	-0.26225	-0.0704305	0.70372	0.1925	0.155241	0.326725	0.152565	0.0337039	-0.0682293	0.168319	0.101255	0.186242	-0.104421	0.0452235	-0.253888	0.270957	0.11097	-0.0480357	0.129819	-0.0320118
ANKRD46	0.172087	-0.048932	-0.0702286	0.144468	-0.140778	-0.0754462	0.289231	0.000467335	-0.268294	-0.0523557	-0.0707668	-0.236981	0.208255	0.714871	-0.313446	-0.250697	0.227232	-0.0410097	0.308527	0.140122	0.291151	-0.0179431	-0.122438	0.257456	-0.195531	-0.0380724	0.521807	0.582867	0.315739	0.494886	0.478918	-0.420294	0.0288232	-0.068528	-0.211849	-0.25944	0.490536	0.3236	0.315926	-0.434591	-0.216516	0.428395	0.479932	0.389407	-0.18078	-0.330499	0.0115997	0.474687	0.3972
ANKRD49	0.0348828	-0.0773235	-0.021735	-0.124531	-0.588236	-0.170932	-0.409154	-0.0299715	-0.0625135	0.660482	-0.033654	-0.263893	0.196652	0.219947	-0.076131	0.231963	0.15773	0.16881	-0.300645	0.22277	0.315739	-0.287813	-0.554682	-0.146657	0.232069	0.644445	0.771366	0.405258	0.00573409	0.481323	0.534276	-0.259951	0.712658	0.130519	-0.386706	0.297807	0.723321	0.241731	0.951344	-0.56462	-0.252866	-0.320217	0.157647	0.185121	-0.248268	-0.361281	-0.162412	0.373412	0.0936018
ANKRD50	-0.056777	0.337577	0.144394	-0.133635	-0.10258	-0.164959	-0.327671	-0.225622	-0.102946	0.280866	-0.127873	-0.0245615	0.324139	0.0179552	0.643192	0.0493266	0.137432	-0.0351253	0.0205261	0.169672	0.123646	-0.255271	-0.0645149	0.0844716	-0.255626	0.340075	-0.172465	-0.154284	-0.097959	-0.211892	0.198571	-0.314079	0.0165091	0.164449	-0.10356	0.0439946	0.251965	0.158908	0.327516	-0.00278742	0.00035598	-0.088296	-0.210687	0.167432	0.0141382	-0.0335795	-0.209048	-0.249557	-0.351247
ANKRD52	0.201838	-0.504837	0.332415	0.0581462	0.320853	-0.107047	-0.242992	0.0430915	0.206681	0.208623	-0.0948986	0.344538	0.0431262	-0.254021	0.237792	0.404867	-0.321131	0.314832	0.0936018	-0.0954376	-0.199433	0.264035	0.163676	-0.0725758	0.172052	0.215062	0.00065492	-0.157213	-0.107727	0.136151	-0.0464121	0.30062	0.149916	0.409846	0.460994	0.918728	0.173339	0.0892854	0.266778	0.318335	0.64892	0.00702869	0.0356937	-0.0769574	0.368999	0.0502067	-0.15528	-0.0417856	-0.0647304
ANKRD53	0.0662659	-0.291266	0.0541737	-0.0128832	-0.125708	-0.375426	-0.17398	0.00864482	0.0541207	0.201188	-0.103837	0.267276	-0.148942	-0.235715	0.23105	0.370329	-0.307379	-0.0248633	-0.308663	-0.16454	0.0486046	-0.266387	0.299384	-0.058644	-0.112774	-0.0187816	-0.21029	-0.230661	-0.198742	-0.104298	-0.104583	0.0551632	0.103953	0.0554312	0.0157483	0.196193	-0.0216894	0.0583	0.104799	0.104644	0.236582	-0.0636765	-0.173776	-0.079491	0.286507	-0.315092	-0.0462568	0.100606	-0.167861
ANKRD54	0.0641619	0.0685333	0.143936	0.023919	-0.193923	0.0954733	-0.132414	-0.212706	0.0252085	-0.0313689	0.000492043	-0.0595461	-0.0713354	-0.0198231	0.0879926	0.0253662	-0.124489	0.0757715	0.0214223	-0.242135	0.0070066	-0.052953	0.146493	-0.245056	0.0879593	0.295624	-0.0030922	-0.0403512	0.0569535	-0.0362939	0.0852412	-0.0467064	-0.110638	-0.312732	0.0688584	0.229768	0.0818395	-0.147025	0.353163	-0.0997915	-0.0125087	0.261055	-0.031167	-0.311099	0.0201848	0.0779024	0.047732	0.183204	0.0216692
ANKRD55	0.0472938	-0.757177	0.238426	0.199668	0.640017	-0.232391	0.116084	0.355692	-0.160881	-0.179165	-0.393571	-0.33874	0.112749	0.128556	-0.762094	-0.358285	0.509537	-1.01958	-0.0468158	0.722592	0.384849	-0.323795	0.147607	0.781887	0.0160628	-1.69598	0.499451	0.415492	1.38733	0.682833	0.272488	-0.821926	-0.170695	-0.667871	0.36725	0.322392	0.0348076	1.28438	0.446558	1.10334	-0.896187	-0.0683353	0.0859673	1.21882	0.0134886	-0.0011979	-0.3875	-0.24202	0.0581769
ANKRD6	-0.00570901	-0.0579706	0.106072	-0.0771215	-0.252738	-0.00664763	0.0728668	-0.212569	0.0200795	-0.548897	-0.0281669	-0.25174	0.308695	0.176171	0.213705	-0.176281	-0.0132723	-0.32218	-0.296208	-0.34837	-0.244935	0.220974	-0.160913	0.507113	-0.303493	0.105802	0.197842	-0.20824	0.190024	-0.346276	0.23028	-0.0018158	-0.439832	-0.277413	-0.324797	0.200421	0.0554635	-0.213343	0.00737665	-0.214482	-0.304711	-0.263073	-0.305414	-0.323174	-0.509617	-0.33511	-0.449013	-0.386218	-0.215114
ANKRD60	0.00823297	0.00960421	-0.35354	-0.211325	0.0117514	-0.140967	-0.884278	-0.222496	-0.0592399	0.0848608	-0.354526	0.0404704	-0.396517	-0.393037	0.364087	0.287322	-0.203682	0.19865	0.0962674	-0.197647	-0.00813908	0.0203391	0.245973	0.0212263	0.120435	0.111519	-0.326027	-0.5312	-0.48119	0.0160628	-0.210729	0.263481	0.362259	-0.0445106	0.039564	0.0302995	-0.0643191	0.115224	0.751167	0.386232	0.225024	-0.304919	-0.282676	-0.297512	-0.0270433	-0.279242	0.0486947	0.189459	-0.100294
ANKRD65	-0.143159	-0.00306335	-0.04988	-0.0689957	-0.00669842	-0.0572808	-0.312732	0.207014	-0.0995803	-0.00398525	0.00150059	0.167299	0.00569206	-0.193957	0.0748146	0.285924	-0.371804	-0.0444788	-0.116707	0.100906	-0.0601011	0.124377	0.361688	0.0949589	0.115289	0.0082813	-0.218794	-0.279384	-0.16074	-0.0799573	-0.217058	-0.0615199	0.116786	-0.077149	0.445546	0.269117	0.00687888	-0.0242461	0.036718	0.00765764	0.206001	-0.202655	0.00444254	0.00677665	0.34045	0.116264	-0.0036782	-0.0594497	0.0616352
ANKRD7	-0.0738118	0.370637	0.148298	-0.0752841	-0.221012	0.185687	-0.0247041	-0.131065	0.1018	0.489839	0.109973	-0.0912112	0.0317496	-0.0811464	-0.0837899	0.00997196	-0.110159	0.185348	-0.127569	-0.039069	0.0790711	-0.36619	-0.134683	-0.296062	-0.0256152	-0.0688604	-0.0662938	0.100075	-0.00551829	-0.10387	-0.139071	0.0690285	0.152755	-0.0114979	0.0386461	-0.0563001	0.110728	-0.153815	-0.0333105	-0.142782	-0.0307923	0.0554312	-0.184816	-0.0551621	-0.0447574	0.200872	0.281138	0.0872563	-0.0122961
ANKRD9	-0.527618	-0.0570381	-0.134447	-0.841214	-0.466941	-0.606214	-0.489098	-0.133765	-0.486704	0.564132	-0.245345	0.00242378	-0.975442	-0.811675	0.564435	0.793334	-0.293214	0.151291	-0.350396	-0.463204	-0.630234	-0.213814	0.109129	-0.581613	0.603882	-0.0678899	-0.414408	-0.116379	-0.422165	-0.163127	-0.0763423	0.0448292	0.284046	0.063316	-0.162447	-0.035008	0.457242	-0.215748	0.81154	0.0215246	0.471589	-0.552922	-0.888926	-0.343138	-0.326409	-0.107017	-0.183804	-0.0315666	-0.191451
ANKS1A	0.0798809	0.023919	0.32876	-0.114711	0.0302477	0.033793	-0.364681	-0.207827	-0.148448	-0.360253	-0.220319	0.0386201	0.270899	0.0365578	0.351492	-0.115599	-0.027475	-0.287514	0.0418904	0.00412394	-0.157102	-0.081536	-0.334435	0.120936	-0.307379	0.435332	-0.22435	0.283831	0.124377	0.0300785	0.0559503	-0.00561292	-0.137575	-0.00895142	-0.0304005	-0.0455378	0.1605	0.341508	-0.26269	0.399468	-0.286928	0.0234886	-0.209373	0.548635	-0.051342	0.62938	-0.165173	-0.246367	0.0668959
ANKS1B	-0.193957	-0.209048	-0.0707339	-0.147934	-0.180158	-0.0297935	-0.0192042	-0.00682387	-0.00342773	0.259622	-0.0206202	0.0889438	-0.183502	-0.147724	-0.0114021	0.0362969	-0.138482	-0.126759	0.0690862	-0.0750814	0.000115046	-0.0175007	0.0578965	-0.0308954	0.037241	-0.0547708	-0.0539133	0.0956365	0.0138339	-0.0877624	-0.112658	-0.0945835	0.106994	0.0997607	0.0177391	0.0222365	0.00269812	-0.139501	0.113386	0.00755703	0.0531616	0.0663952	-0.0225932	-0.00350687	0.0631335	-0.0635514	0.203155	0.25925	0.0194518
ANKS3	-0.369108	-0.234806	0.135769	-0.0284245	-0.200697	-0.222164	0.00321514	-0.196765	-0.203636	0.176285	-0.312168	-0.198422	-0.309757	0.0718578	-0.0233319	0.310627	-0.514491	-0.227548	0.00705309	-0.497481	-0.599289	-0.185992	0.368197	-0.08821	0.500262	-0.103121	0.102557	0.0472659	0.142588	-0.142782	0.00326574	-0.212963	-0.121961	0.42527	0.417543	0.517999	0.151083	0.403041	0.0361409	-0.281764	0.165549	0.0383428	-0.205641	-0.155341	0.123275	-0.544819	-0.194745	0.28214	-0.201851
ANKS4B	0.0225403	0.0525199	0.0526963	-0.051342	-0.011423	-0.00667288	0.094127	-0.136627	0.132759	0.108524	0.046636	0.372953	0.185028	0.0561884	0.345002	0.0855241	0.0710918	-0.0827737	0.18573	0.264035	-0.42612	0.0893161	0.181194	0.633191	-0.64238	-0.213539	0.0247081	-0.107866	-0.0405837	-0.0415036	-0.294969	-0.232698	0.204364	0.0967367	0.217939	0.578307	-0.381561	-0.963771	-0.545506	-0.103411	0.302138	0.117488	-0.0978113	0.109304	0.174007	-0.0549331	0.0347838	-0.0274503	-0.222009
ANKS6	0.0557679	-0.0462337	-0.0262838	0.0441787	0.185251	-0.2274	-0.104803	-0.0119931	-0.0873362	-0.0915729	-0.180585	-0.0205905	-0.127979	-0.019799	-0.0530279	-0.033654	0.0134136	-0.197162	-0.0813955	0.0786185	-0.111145	-0.00649265	0.00384291	-0.163252	-0.0483245	0.0602077	0.0448292	0.178083	0.0694093	-0.0215981	0.0273574	-0.196551	0.0952088	-0.126727	-0.131735	-0.043868	-0.0487071	0.0682809	0.0581769	-0.0786047	-0.00898254	-0.0414763	-0.149151	0.032808	-0.115379	-0.163176	-0.106643	0.156788	0.119778
ANKUB1	0.051372	-0.0560903	0.2143	0.309539	0.165176	0.171891	0.0815807	0.445024	0.217618	0.366195	0.373624	0.285071	0.267061	-0.215114	0.169176	-0.137972	-0.173507	0.325726	0.0401326	0.21463	0.0862486	0.301299	0.325055	-0.0657371	0.105621	-0.115668	-0.00840273	-0.0591362	-0.114412	-0.0510222	-0.277227	0.0801649	-0.104475	0.284176	0.257392	0.375912	-0.110892	-0.161035	-0.00586523	0.223999	0.134101	-0.115252	0.0611154	0.00559507	0.0658355	0.157647	0.00502158	-0.285943	0.00633133
ANKZF1	0.048541	-0.592169	0.247733	-0.100017	-0.155373	-0.1241	-0.169123	-0.212963	-0.108961	-0.220682	-0.458011	0.0294655	-0.0469798	0.0941602	0.0372156	-0.105589	-0.318206	-0.251056	0.0274091	-0.315923	-0.102764	0.00521267	0.425607	-0.100423	0.726748	0.316004	0.145919	0.209373	-0.0054303	0.0240787	-0.000677823	-0.0830421	0.0561884	-0.237786	0.401117	0.19505	0.0210495	0.0972746	0.165269	-0.134574	0.076323	-0.06925	0.00900443	-0.104531	-0.2205	-0.34171	-0.279018	0.292784	-0.153738
ANLN	-0.08341	0.288573	-0.158526	-0.113409	-0.130986	-0.122955	0.148958	-0.00793562	0.0741361	0.00885745	-0.0535724	-0.0133883	0.0464886	0.244966	0.132551	-0.099425	-0.150176	-0.266337	-0.160654	-0.280848	0.0256857	-0.172817	0.262493	-0.258136	0.242908	-0.054036	-0.0489076	0.15829	-0.0218519	-0.0431223	-0.0683983	-0.11272	-0.111911	0.205369	-0.0412832	-0.198194	-0.0778939	-0.160614	-0.0376747	-0.260381	0.00651826	-0.235343	-0.0732274	-0.144966	-0.262883	-0.0845262	-0.0772338	-0.0920376	0.00140174
ANO1	-0.00807964	-0.183653	0.0653237	0.115431	-0.055933	0.106179	-0.108986	-0.077059	0.0430915	0.0452534	0.0252085	0.148571	-0.0346034	-0.146911	-0.106199	0.163601	-0.2246	0.220174	-0.117408	-0.0273718	-0.0361232	-0.015727	0.216008	-0.0300553	0.0761186	0.0208999	-0.234705	0.0720768	-0.15747	-0.151279	-0.0547922	0.0611455	0.272895	0.0100953	0.256861	0.28228	-0.0885847	0.177383	-0.321837	0.312872	0.173963	-0.0348982	-0.121929	0.0861182	-0.0754766	-0.0838222	0.027061	0.00308914	0.0334786
ANO10	0.431367	0.219562	0.608552	0.0762671	-0.254522	-0.25951	-0.239147	-0.188255	0.0215489	-0.475094	-0.138828	0.322771	0.405124	-0.0427657	0.183517	0.0066709	-0.0368134	0.0994527	-0.0629067	-0.09753	-0.107377	0.109471	0.150528	0.227344	0.337296	0.0163777	-0.326787	-0.115163	-0.127693	-0.729584	-0.0116678	-0.142419	-0.0936104	0.199208	-0.323703	-0.093807	0.0146149	-0.351868	-0.252512	0.0499569	-0.0404021	-0.166338	0.187713	0.306028	0.340524	-0.312237	-0.644927	-0.57567	-0.630875
ANO2	-0.0010104	0.0736261	0.268382	-0.0259266	0.0186915	0.071225	0.0529862	0.0280444	0.0224895	0.101959	0.140079	0.595893	-0.0752252	-0.0957417	-0.110074	0.0981695	-0.140895	0.215848	0.0287378	-0.191729	0.0727544	-0.0271221	0.0810361	-0.0108808	0.355048	-0.272117	-0.0378518	0.0267549	-0.258424	-0.345395	-0.173349	0.00674452	0.417044	-0.103471	-0.0348388	0.0708335	-0.368537	-0.305336	0.164502	0.0157226	-0.055084	-0.283767	-0.366977	-0.0784379	0.0104651	0.210629	0.310483	0.181238	0.0407729
ANO3	0.302053	0.513124	-0.0769016	-0.101876	0.018083	0.169426	0.0876837	0.0726413	0.390531	0.0573783	-0.189742	0.150687	-0.201624	-0.120587	0.31248	0.183475	0.13772	0.112817	-0.0260555	-0.00864001	0.278884	-0.013698	0.00492605	-0.301746	0.19147	-0.0877372	-0.166587	-0.0390957	0.0786808	-0.462174	-0.133576	-0.128651	0.418074	-0.246531	-0.107406	-0.0672348	0.152519	0.168274	-0.280783	-0.0589506	-0.131574	-0.230201	-0.11576	0.0997321	-0.408113	-0.14393	0.386232	0.0237019	0.113878
ANO4	0.124742	-0.046659	-0.129729	-0.0714163	0.105225	0.236073	0.0919037	0.170671	0.0615762	0.259559	0.217829	0.0508626	-0.0478152	-0.0158262	0.0236521	0.0312011	0.035338	0.0227407	0.0383694	0.107068	0.169016	-0.03168	0.0617318	0.0773589	0.0272941	-0.139377	-0.0312978	-0.0282181	-0.015703	-0.13314	-0.1435	0.209976	-0.00469145	0.00833284	0.248647	-0.0326808	-0.116469	-0.146486	-0.132041	-0.163176	0.197217	0.10113	0.0434562	0.00825698	0.0691987	0.0176177	0.148448	-0.0306292	-0.0050416
ANO5	-0.126092	0.0795241	0.389674	0.296811	-0.071223	-0.248102	-0.160691	-0.0658462	0.134789	-0.00113329	-0.0553275	-0.0607038	0.139834	-0.321131	-0.211626	0.066457	-0.546248	0.0834721	0.0265658	-0.0251283	0.243023	0.26624	-0.130284	-0.0923225	0.0161459	-0.00796119	-0.221957	-0.469895	-0.112972	-0.241528	-0.349234	-0.0527399	-0.271982	-0.130384	-0.359486	0.0186915	-0.126759	-0.250331	0.450921	0.378995	-0.074788	-0.0868106	-0.112388	0.019824	0.0362498	0.294125	0.0653237	0.0308378	0.118184
ANO6	-0.0508978	0.36596	0.790152	-0.168511	-0.0652313	-0.163049	0.326725	0.0415519	0.249647	0.180691	0.231452	0.294125	-0.0559586	0.0714179	0.368197	0.324416	0.319944	0.287397	0.21921	0.258665	0.345484	0.3753	-0.348249	-0.0697294	0.388092	0.114499	0.0945708	0.336045	0.0610808	0.0453113	0.328106	-0.182009	-0.177536	-0.198691	0.157776	-0.161371	0.243729	0.160003	0.374798	0.0576844	-0.0408168	0.279021	-0.0308147	0.340721	0.329909	0.185952	-0.168135	-0.424555	0.0875281
ANO7	0.269673	-0.18669	0.109646	-0.145857	0.210905	-0.0902246	-0.138112	0.122189	-0.0397618	0.221977	-0.0274964	0.243651	-0.455175	-0.339316	0.194408	0.783106	-0.571652	0.539763	0.0585198	0.369875	0.0818944	0.497544	-0.0478689	-0.419265	0.106242	0.0172974	-0.440975	-0.179499	-0.445208	0.0162789	-1.38056	0.15825	0.057959	0.482759	-0.0162812	0.506043	-0.335327	-0.232971	-0.0101165	0.903831	0.511094	-0.00567875	-0.279641	0.1794	0.250851	-0.082826	0.236873	-0.0651974	-0.189916
ANO8	0.34045	-0.523255	-0.207299	0.181111	0.0547663	0.0444105	-0.415926	-0.0995178	-0.252405	-0.0989609	-0.0613421	0.54237	0.0538073	0.00893609	0.253004	0.339683	-0.0809117	-0.205834	0.548119	-0.022693	-0.0170086	0.164579	0.573712	0.1082	0.434438	0.229986	0.0991684	0.0458275	0.0561336	0.0112016	0.0670203	0.0102607	-0.105471	-0.228271	0.399893	0.0214507	0.181194	-0.371689	0.130226	0.264639	0.147948	0.152392	-0.392181	-0.0730168	0.256434	0.14016	-0.159001	0.0823791	-0.121632
ANO9	-0.0369188	-0.235184	0.322677	-0.0834393	0.172519	-0.0618108	-0.289069	-0.040474	-0.0989004	0.187713	-0.277413	0.00869427	-0.301601	0.0617864	-0.00705559	0.140033	-0.0971103	0.0878342	0.228524	0.109055	0.387299	0.163108	0.250795	-0.144853	0.116298	0.109328	-0.254324	0.182288	0.0477562	0.0724177	-0.0308689	0.12156	-0.0992897	-0.0668395	0.0284092	-0.0817594	-0.26515	0.126712	0.346179	0.00937978	0.309211	-0.259823	0.0092143	-0.281192	0.254046	-0.415101	0.144636	0.133205	0.00817987
ANOS1	0.154125	-0.0509717	-0.247947	-0.214525	-0.0428466	-0.316223	0.0584065	0.0939026	-0.138305	0.255384	-0.228271	0.167983	0.0999494	-0.176066	0.499016	-0.0608063	-0.295822	0.113032	0.290433	-0.212858	-0.0497789	0.0135104	-0.0571438	-0.0239613	-0.0477896	0.698792	-0.292361	-0.136537	-0.0407426	-0.336103	0.130519	-0.026714	0.160633	0.928149	0.705953	0.111519	-0.0768328	0.12642	0.0716521	0.0916539	0.371156	-0.128344	0.0343899	-0.128085	0.0988998	0.0111778	-0.0420714	0.00735223	-0.131812
ANP32A	-0.158331	-0.0283219	0.155774	0.195826	0.19194	-0.0121636	-0.00415518	-0.201892	-0.0682814	-0.331174	-0.356305	-0.348249	0.328359	0.106179	-0.0271911	-0.323094	0.469975	-0.479287	0.19911	-0.105529	-0.118741	-0.0252823	-0.246531	0.396537	-0.282419	0.164933	-0.00672384	0.0607253	0.131087	0.159741	0.107068	0.172913	-0.334649	0.162512	-0.334554	-0.0369727	0.106072	0.285354	-0.228518	-0.144287	-0.307608	0.152322	0.103476	0.176928	-0.137433	-0.148942	-0.386519	0.0426732	-0.208648
ANP32A-IT1	-0.630234	0.385996	0.717156	-0.424555	-0.0468158	0.000995458	0.16605	-0.165246	0.0523231	-0.459399	-0.4351	-0.444708	0.473344	0.140533	-0.287588	-0.518826	0.0463231	-0.65704	-0.334435	-0.467545	-0.418413	0.48062	-0.548897	0.248784	-0.636184	0.17742	-0.446475	0.0225652	0.110906	-0.69807	-0.249334	0.180816	-0.919786	-0.824814	-0.585544	-0.384178	-0.469693	0.23202	-0.462648	-0.0993262	-1.02473	-0.35685	-0.0533062	-0.243515	-0.222976	0.120717	-0.174595	0.197109	-0.157641
ANP32B	-0.225477	-0.232492	-0.233289	-0.175771	-0.256515	-0.307783	0.203051	-0.362845	-0.345395	0.345763	-0.232492	-0.213632	-0.195894	0.380624	-0.375275	0.0771145	0.156273	-0.0316107	-0.127631	-0.0910523	-0.176113	-0.133466	-0.268612	0.131123	-0.0156469	-0.0595062	0.332326	0.498555	0.333851	0.395492	0.301153	-0.0979249	0.0925269	0.0274321	-0.172338	-0.23662	0.379586	0.522695	0.10329	-0.198647	-0.0408971	0.287129	0.153046	0.298397	-0.237893	-0.47979	-0.16583	0.376656	0.217104
ANP32C	0.125923	-0.482846	0.108861	-0.0013449	0.0841371	0.040413	-0.312554	0.282433	-0.0579151	-0.0424298	-0.115862	0.329805	0.219723	-0.389836	-0.318046	0.384368	-0.345685	-0.168965	-0.288374	0.205007	-0.390126	-0.193957	0.422853	0.158908	0.19552	-0.0936429	-0.298284	-0.119077	-0.11177	0.0400752	0.0238341	0.105938	0.0303798	0.255922	-0.106612	0.216993	-0.0794633	-0.368037	0.0469383	0.00952736	0.0216989	0.115807	0.4679	0.180012	0.125556	0.0907261	-0.112628	0.0991684	-0.0668395
ANP32D	-0.0322958	-0.0137476	0.464214	0.128995	0.281688	-0.189916	-0.379726	0.0118568	-0.142419	0.130766	-0.115163	0.023995	-0.150844	-0.121294	0.204857	0.0491622	0.0122583	0.216684	0.31941	0.331806	-0.192268	0.0969593	0.00748092	-0.105776	-0.127801	0.167299	0.101638	0.106454	0.092188	-0.398502	-0.149218	-0.0982633	0.242126	0.0602077	0.100075	0.529474	-0.454425	-0.163754	-0.00558178	-0.149706	0.344804	-0.307526	-0.141334	-0.374619	0.154779	0.365597	-0.0636139	-0.0821466	-0.22842
ANP32E	0.467688	-0.0894546	-0.183256	-0.429522	-0.516529	-0.459629	0.552786	-0.301958	-0.402563	-0.123028	-0.0940831	-0.372507	0.0282749	0.604378	-0.289623	-0.330499	0.455825	-0.173898	0.0212006	0.0408004	0.528879	-0.315004	-0.660268	-0.723691	-0.304632	0.120717	0.473127	0.491361	0.780775	0.470813	0.326081	-0.416559	-0.0798006	0.503912	-0.0339853	-0.419578	0.495563	0.111351	0.403041	-0.441162	-0.301192	0.0611154	0.462241	-0.395403	-0.457031	-0.187037	0.341027	0.275198	0.601699
ANPEP	0.0160628	0.342946	0.206269	0.437989	0.363348	0.0489641	0.258197	0.00803579	0.0523455	-0.178144	0.134286	0.1088	0.146797	-0.0547922	-0.0968432	0.0276506	0.0516001	0.00979304	0.196233	-0.0997625	-0.0931181	0.187824	0.277924	0.201137	0.0257106	0.20346	-0.156018	-0.0248633	-0.0336298	0.0133594	-0.0158549	0.436023	-0.238479	-0.289296	-0.00176633	0.1848	-0.00672384	0.105915	-0.36239	0.0562956	0.0145538	-0.169123	-0.205598	0.0678359	0.210325	-0.116136	-0.336277	-0.311639	-0.244636
ANTXR1	-0.00547087	0.0488859	0.146998	-0.0243936	0.188547	0.131418	-0.0388951	0.13963	0.26774	0.27197	0.162159	0.0795968	-0.0658462	-0.0968737	0.0193163	-0.00563461	-0.0769323	0.262493	0.0432971	-0.0955854	0.12881	0.0898777	0.0940209	-0.174703	-0.0403512	-0.291815	-0.124261	-0.175541	-0.164616	-0.0143495	-0.146181	0.161154	0.0853291	0.0170538	0.128556	0.119327	-0.264106	-0.197426	0.0603247	0.0100403	0.100274	0.0575174	-0.100294	-0.12106	0.219614	0.202852	0.0610191	0.0519352	-0.153954
ANTXR2	-0.0231085	0.503336	0.347594	0.508526	0.305888	0.551712	0.0909482	-0.0993262	0.197842	-0.198908	-0.19028	-0.15254	-0.0807603	0.0029062	0.108623	0.142394	0.178443	-0.202885	-0.148734	-0.110702	-0.0236975	0.0592759	-0.154511	0.517043	0.110407	0.101196	0.0102607	0.0596688	0.0988416	-0.0663996	0.053706	0.0978561	-0.209733	-0.264031	-0.375682	0.147948	0.0956073	0.345669	0.11514	-0.0160311	-0.186511	-0.080312	0.37505	0.0269079	-0.25626	-0.0326808	-0.368978	-0.466941	-0.547395
ANXA1	0.436023	-0.0740449	-0.539744	-0.473433	-0.248377	-0.0693091	0.248647	-0.979391	-0.123084	0.0137872	-0.311726	-0.273794	0.115041	0.0618719	0.205056	-0.630875	0.44517	-0.457031	0.141453	-0.0401474	0.0766103	-0.827065	-0.226547	-0.455579	-0.0899635	0.308527	0.276906	-0.0244159	0.106965	-0.543832	0.631565	-0.891139	-0.472712	0.109843	-1.14372	-0.512438	0.453664	-0.430499	0.00861875	-0.77506	-0.677001	-0.514224	-0.37725	-0.285716	-0.96746	-0.453435	-0.104502	-0.221109	0.124989
ANXA10	0.619618	0.0502067	-0.0371867	0.0669227	0.136692	0.273489	-0.0204129	0.286745	-0.129446	-0.0462094	0.237921	0.0967671	-0.0128571	0.00502158	-0.303811	-0.154254	0.0391869	0.0816679	-0.114597	-0.0617848	-0.219191	-0.131065	-0.093427	-0.347746	0.144165	-0.0655973	-0.0845262	-0.118226	-0.161603	-0.0415554	0.156572	-0.0469568	-0.201402	-0.211716	-0.0769574	0.394601	0.208521	-0.262313	0.0497902	0.276494	-0.115285	0.0552533	-0.184351	-0.376053	0.0505093	0.177858	-0.023283	-0.222009	0.183383
ANXA11	-0.107377	0.0666471	0.0820245	0.309046	0.25146	0.0705117	0.249951	-0.0746641	0.225534	-0.323263	-0.110638	-0.040092	0.301453	0.120581	0.114373	-0.112748	0.0933717	-0.265909	0.0410006	0.0547351	-0.040656	0.300412	-0.145623	0.725844	0.0261512	0.218215	-0.000100289	0.163956	0.255443	0.0442436	0.0428136	0.205326	-0.309351	-0.272558	-0.184399	0.00239915	-0.210474	0.112542	-0.199071	0.0570093	-0.157377	0.317892	0.140122	0.227851	-0.00578866	0.0981044	-0.387726	-0.228271	-0.517394
ANXA13	-0.127023	-0.367921	-0.0860942	-0.164083	0.118909	-0.126792	0.0115763	0.0300367	-0.05142	0.114297	-0.340775	0.246973	-0.187377	-0.174327	0.193831	0.0532489	0.205424	0.282057	0.188245	-0.0683711	0.113483	-0.287736	0.715531	-0.206591	0.0532235	-0.145932	-0.147762	-0.588671	-0.205756	-0.249233	0.100706	0.109304	0.118299	0.154738	-0.105802	0.289498	-0.129057	-0.158225	0.0428713	0.281337	-0.0135663	-0.0784379	0.0487192	-0.120403	-0.0998183	-0.491416	-0.0948986	0.087864	-0.140005
ANXA2	0.0549887	-0.208869	-0.288994	-0.59566	0.00864482	-0.207337	-0.0325015	-0.489375	-0.192836	-0.204999	0.0118014	-0.169858	-0.20509	0.0671076	-0.0113559	-0.230504	0.12156	-0.264682	0.310483	-0.00115175	-0.12848	-0.448795	-0.250992	0.373521	-0.025482	0.287397	-0.164462	-0.0351734	0.209465	-0.0318027	0.275879	-0.368037	-0.24044	0.437426	-0.144658	-0.101298	0.17507	-0.154822	-0.0183034	-0.246658	-0.263893	0.305813	0.0796906	0.132364	0.424154	0.287194	-0.491695	-0.574168	-0.29076
ANXA2P1	-0.317788	0.126823	-0.116108	-0.116469	-0.375426	-0.221957	0.0468612	-0.301601	0.00874259	0.211064	0.605752	-0.0385931	-0.351044	-0.29821	0.770506	0.43166	-0.0769839	-0.0930521	0.188197	-0.351158	-0.0896937	0.0943433	0.397508	0.0488562	0.301623	0.03165	-0.199568	0.0507165	0.100674	0.138718	-0.257144	0.197046	-0.0382675	-0.0579959	0.231684	0.107489	-0.293732	-0.39053	0.0291923	0.49294	0.403626	0.0306836	0.116894	-0.0279415	-0.0341708	0.786855	-0.0210434	0.161741	-0.280649
ANXA2P2	0.075147	0.190635	0.0548173	-0.359379	0.344538	0.0948913	0.0218225	-0.216953	-0.0444217	-0.0695063	0.169811	-0.111354	-0.134261	-0.00662376	0.0531616	-0.124565	0.266855	-0.270033	0.453502	0.207164	0.102876	-0.26888	-0.140237	0.327594	-0.111448	-0.0074151	-0.290402	-0.155907	0.232278	-0.218365	0.0926627	-0.0526295	-0.0495493	0.587908	-0.0203079	-0.181397	-0.0338887	-0.198461	-0.0309897	-0.0906878	-0.174749	0.333185	0.119292	0.144925	0.502274	0.493145	-0.377144	-0.727934	-0.416559
ANXA2P3	0.157249	0.322962	-0.037585	-0.170444	0.642689	0.115903	0.129134	-0.0646064	0.151663	0.224612	0.647194	-0.126327	-0.0264245	-0.00435333	-0.00664763	0.125484	0.104509	-0.0944037	0.251209	-0.0649467	0.214687	-0.0785458	-0.0262088	0.101769	-0.412202	-0.381821	-0.246771	-0.120678	-0.160031	0.0730013	-0.10433	-0.117707	-0.288238	0.444536	-0.0729888	0.0452828	-0.114653	-0.201402	-0.193957	-0.0415554	-0.0445106	-0.0754462	0.288357	0.115041	0.149887	0.398961	0.0801118	-0.164031	-0.281936
ANXA2R	-0.278348	-0.493032	-0.484971	0.0744317	-0.406567	-0.225785	0.0245035	-0.35354	-0.131735	-0.0992035	-0.65704	-0.222697	-0.0887102	0.39206	-0.432202	-0.606812	0.0856209	-0.360357	-0.222496	-0.179994	-0.0825894	-0.304632	0.122119	-0.0641282	-0.4175	-0.0972325	0.465841	0.311691	0.339683	0.102163	0.200822	-0.0338647	-0.0275477	-0.465606	-0.0507854	-0.447842	0.0810999	0.0120511	-0.257607	-0.283425	-0.443047	0.134241	-0.0266161	-0.270843	-0.395697	-0.667871	0.879197	0.4234	0.724156
ANXA3	-0.970842	1.47671	1.03509	-0.411564	-0.202261	-0.130893	-0.0697022	-0.0579959	0.454048	-1.14372	-0.49625	-0.451581	0.0288474	-1.94188	0.237275	-1.00297	0.211779	-0.348047	-1.24228	-1.26387	-1.2094	-1.55748	-1.55748	0.398025	0.180191	-0.957207	-0.103387	-0.00788448	-0.222009	-0.567443	0.0683804	-1.07169	-0.51553	-1.06684	-1.66259	-1.33085	-0.196946	-0.114625	-0.235715	-0.405486	-1.12796	-2.10387	0.172014	-1.38056	-0.855816	-0.154511	0.345398	0.0786808	-0.191
ANXA4	0.216107	0.127093	0.204169	-0.558229	-0.174633	-0.474247	-0.345395	-0.309987	-0.327406	-0.288994	0.269725	-0.249864	0.18215	0.140653	0.00775936	-0.301668	0.296342	-0.203224	0.184528	-0.112234	-0.146522	-0.176872	-0.764485	-0.0225244	-0.195974	0.503912	-0.220962	-0.147861	0.0991044	0.0206827	0.308461	-0.34837	-0.318608	0.422535	-0.196551	-0.197827	0.273278	-0.064429	0.246652	-0.210332	-0.17787	-0.0384278	-0.283342	0.042533	0.230179	0.169211	-0.674565	-0.923604	-0.510498
ANXA5	-0.0547003	0.104422	0.250321	0.186972	0.00976657	0.110344	0.0752462	-0.647057	-0.384734	-0.569738	-0.0147955	-0.252035	-0.089771	-0.0544693	-0.947962	-0.565879	0.366869	-0.360863	0.236582	0.0310078	-0.108268	-0.398631	-0.15239	-0.0460993	-0.115562	0.261379	-0.297577	0.0449325	0.109304	-0.290539	0.436023	-0.0208869	-0.679744	0.222017	-0.396938	-0.0991701	-0.128966	-0.10654	-0.199356	0.240941	-0.249116	0.762273	-0.439462	0.49255	0.202852	0.638499	0.255703	0.124678	0.131047
ANXA6	0.304629	0.0760229	-0.0653697	0.0676129	0.252269	0.138686	0.140033	0.208521	-0.0551401	0.0810361	0.208791	0.283306	-0.0197762	0.192949	0.297981	0.0987467	0.00116993	0.774234	0.54839	0.604378	0.297632	0.280029	0.0278449	0.0611793	-0.000359295	0.32999	-0.0156286	0.227793	0.246339	0.40233	0.108827	0.150849	0.156827	0.40713	0.251209	-0.0110577	0.183426	0.187306	0.116746	-0.121221	0.175647	0.1042	0.350545	0.184224	0.45846	-0.0165537	-0.270033	-0.327946	-0.311726
ANXA7	0.242469	-0.0717219	0.0452235	0.107489	0.0401875	0.109471	0.438169	-0.0498359	-0.00487243	0.0310366	0.224119	-0.105751	0.647194	0.248647	0.0196621	-0.170656	0.369875	0.0879593	0.288213	0.226955	0.247894	0.131496	-0.114358	0.313393	-0.190191	0.18659	0.203997	0.368197	0.519134	0.313222	0.131901	0.0974951	-0.242877	0.334588	0.162062	-0.0584278	0.169426	-0.0669826	0.211319	-0.0653985	-0.0746641	0.665506	0.323414	0.502807	0.207065	0.469558	0.0635934	0.0602696	0.300845
ANXA9	-0.0919272	-0.0866923	0.128459	0.141697	0.245478	0.178655	0.285617	0.322312	-0.0901671	-0.0069831	-0.261675	0.027061	-0.350097	-0.104502	0.208471	-0.0869926	0.0366065	-0.111999	0.0256857	0.0828806	-0.243628	-0.23638	0.0249646	0.0628604	0.082284	-0.625481	-0.167037	-0.159468	-0.144164	-0.252464	-0.210474	0.0711221	-0.126666	0.595893	-0.0950888	0.333284	-0.0555236	-0.22788	-0.384056	0.706539	0.260615	-0.00614378	-0.0830967	-0.0607283	0.0632552	-0.217749	-0.0723661	-0.119318	-0.402563
AOAH	-0.139603	0.165099	0.0924643	0.00326574	-0.336804	-0.146775	-0.395118	-0.649585	-0.330686	-0.2763	-0.383727	-0.167939	0.460796	0.0168359	0.136548	-0.0878955	0.446897	-0.231557	-0.0716406	0.0916539	-0.0909666	-0.0732807	-0.188016	0.26698	-0.234386	0.146225	-0.185415	-0.530253	-0.0809117	-0.0790675	0.275395	-0.239147	-0.40241	-0.112912	-0.117859	0.0834023	0.111037	0.152359	0.108684	-0.122229	-0.382748	0.186242	-0.130761	0.623696	0.0855241	0.502274	-0.735062	-0.517629	-0.490637
AOC1	-0.586062	0.465383	-0.296616	-0.660268	-0.549646	-0.587903	0.874307	-0.0655724	0.333284	0.0323967	-0.186755	-0.301958	-0.0571218	-0.134261	-0.781268	-0.0178936	0.367729	-0.20654	0.475903	-0.951082	-0.510778	0.903831	0.0246367	1.41284	0.436023	-0.357955	-0.0110071	-0.0867224	2.49994	-0.611589	0.121739	1.12377	-0.0667539	-0.393175	0.762273	2.49994	0.116894	-0.0113305	0.156617	0.234907	-0.0393096	-0.554682	2.07672	-0.632673	-0.359486	-0.500645	-0.526278	-0.194225	-0.320151
AOC2	0.512232	0.854379	1.03794	1.13704	0.946564	0.866765	0.944621	0.834865	1.15427	-0.291039	0.806681	0.245727	0.7185	0.11584	1.2426	-0.0465717	0.183016	0.858387	0.0387964	0.590482	0.0110773	1.11141	-0.366085	0.989792	0.0903085	1.31654	0.0136535	0.0724491	-0.051702	0.442879	-0.313129	0.817082	-0.251422	0.634915	-0.230714	1.00272	0.305211	-0.0496834	-0.0697294	0.296811	0.0294655	1.00526	0.2979	0.997379	1.83206	-0.0503609	-0.318796	-0.588671	-0.864741
AOC3	-0.0759905	0.785581	0.223882	0.979779	0.0869518	0.156827	0.400516	-0.2205	0.203666	-0.290228	0.392765	-0.0314883	0.603135	0.179923	0.991875	-0.014141	0.285146	-0.416271	0.00557022	0.0638896	-0.253387	0.156408	-0.270666	0.464428	0.151137	1.27884	-0.0788208	0.0788621	-0.387843	0.635374	-0.275726	0.0912588	-0.395697	-0.26515	-0.385814	0.744446	0.399351	0.313797	0.292455	0.326973	-0.124864	0.987328	0.380345	0.5871	1.87226	0.152483	-0.719623	-0.77506	-0.539436
AOC4P	-0.0909396	-0.0421449	-0.0102972	0.039109	0.0291657	-0.39668	-0.304711	-0.0116971	-0.228124	0.297981	-0.257607	0.551712	-0.274763	-0.0723064	0.0334467	0.38409	-0.050201	0.0148157	0.0983895	0.113978	-0.415609	-0.0436229	0.117488	0.238249	0.524099	0.155617	-0.00845715	-0.133965	-0.161292	0.207431	-0.387726	-0.0918444	0.0172974	0.400516	0.164539	0.167245	-0.375682	0.197158	0.102397	0.26194	0.601699	-0.138039	-0.303493	-0.334251	0.305956	-0.121395	-0.0504255	0.0102607	-0.0523031
AOPEP	-0.00211516	0.138516	0.0104401	-0.0118687	-0.2387	-0.0159075	-0.27034	-0.0238945	-0.0859228	-0.0516261	-0.00390638	0.245088	-0.0351253	0.188462	-0.0373648	-0.101525	-0.169941	0.0807169	-0.0424024	-0.263019	0.00625835	-0.032729	0.0157226	-0.390366	0.12727	-0.278953	-0.0866151	0.0433523	0.132939	-0.227504	-0.308121	-0.116566	-0.19574	-0.000464925	-0.078465	0.0348578	-0.0534409	0.0340061	-0.115668	-0.115599	-0.0613173	-0.290228	0.148669	-0.0207906	-0.334649	-0.437228	0.13334	0.0180578	0.186459
AOX1	0.0890698	0.12007	0.0910812	0.285487	0.358209	-0.0317058	-0.204772	0.289837	0.393292	0.499236	0.159904	0.0275981	-0.00252632	-0.124604	-0.137366	0.0246639	0.0946391	0.00633133	0.121181	0.356363	0.0791	0.10758	0.0210763	-0.341929	-0.037909	-0.244372	-0.0649718	-0.0806381	-0.342868	0.00129924	-0.017552	0.307922	-0.0831814	0.20918	-0.0721643	0.195605	-0.249756	-0.596187	0.0381328	0.146563	0.0541737	0.110284	-0.152199	0.0336332	0.209323	0.0135732	0.328027	-0.153499	-0.165874
AOX2P	-0.263834	0.362943	0.133774	0.0203155	-0.00644047	0.107489	0.11328	0.129856	0.204418	0.349606	0.0508296	0.436559	-0.0710821	-0.492731	0.356679	0.134529	-0.187377	0.162625	0.354243	-0.0931531	0.0808145	0.481323	0.12141	-0.146596	0.172952	-0.118255	-0.194745	-0.265909	-0.111118	-0.0228282	-0.165285	0.484078	0.313643	0.330934	0.286745	0.0804411	-0.660931	-0.208376	0.0614066	0.0867022	0.280402	-0.00845715	-0.014217	0.169426	0.550158	0.0308378	-0.17656	-0.253269	0.0738379
AP1AR	0.136223	0.140653	0.00536148	0.0380745	-0.100393	0.137679	0.0467358	0.193878	0.00430593	0.291355	0.0784643	0.00444254	0.304018	0.207705	-0.0372619	-0.0535724	0.398025	0.0939614	0.239336	0.215157	0.380094	0.00791021	-0.0256611	0.0358088	-0.208325	0.00871685	0.184707	0.0381851	0.0369928	0.0592759	0.0982269	-0.212706	-0.0741017	0.155736	-0.099425	-0.104555	0.151372	0.141387	0.179844	-0.123055	-0.0427657	-0.118164	0.146259	-0.132688	-0.0114021	0.123032	-0.0438037	0.0242375	0.218003
[truncated: 19,736 more rows]
[truncated: 93 more columns]
