# Supplementary material for: Exploration of Potential Integrated Models of N6-Methyladenosine Immunity in Systemic Lupus Erythematosus by Bioinformatic Analyses
Source: Front Immunol. 2022 Feb 7;12:752736. doi: 10.3389/fimmu.2021.752736 (PMC8859446; doi:10.3389/fimmu.2021.752736)
Supplement: Supplementary Table 12 — Datas of the gene expression of GSE156751. [file Table_12.xls]

## Sheet: Sheet1
Genes	GSM4743461	GSM4743464	GSM4743467	GSM4743470	GSM4743473	GSM4743476	GSM4743479	GSM4743482	GSM4743462	GSM4743465	GSM4743468	GSM4743471	GSM4743474	GSM4743477	GSM4743480	GSM4743483	GSM4743463	GSM4743466	GSM4743469	GSM4743472	GSM4743475	GSM4743478	GSM4743481	GSM4743484
A1BG	0.61997	0.890691	-0.167085	0.254185	0.218583	0.20889	0.214338	-0.720747	0.475435	0.844602	0.0867447	0.387854	0.1815	0.399002	-0.124414	0.55982	0.266191	0.673843	0.282798	0.278088	-0.750638	-0.769474	-0.323967	-0.774992
A1BG-AS1	0.211401	0.114728	0.157039	0.32158	-0.458036	0.0313179	-0.0549638	0.484142	0.346265	0.275854	0.277633	0.699765	0.109863	0.480771	-0.289543	0.480604	-0.408217	-0.639885	-0.0953456	0.228755	-1.0659	-0.789315	-0.712416	-0.515468
A1CF	-0.459991	-0.144861	-0.465834	-0.284981	0.244958	0.34176	0.418004	0.599958	-0.196901	-0.38047	-0.290459	-0.313344	0.3762	0.346776	0.627647	0.597594	-0.178157	-0.27931	-0.171369	-0.35437	0.331721	0.389331	0.354623	0.272949
A2M	-1.33106	-1.32563	-1.2162	-1.1646	2.6864	0.245922	-0.318866	-0.337475	-1.13129	-1.052	-0.922333	-1.13967	-0.341199	-0.724403	-0.244547	-0.742012	3.62145	4.68053	3.90647	4.67327	4.22586	4.46	0.977902	3.32442
A2M-AS1	0.427914	0.0935058	0.339664	0.507598	-0.441727	0.187124	0.415844	-0.349172	0.0354741	0.318104	0.416213	0.0414385	-0.455442	-0.0361812	0.522593	-0.635465	-0.0656549	0.391486	0.515558	0.0945575	-0.943715	0.0794609	-0.46096	-0.633659
A2ML1	-0.512194	-0.357464	-0.441413	-0.337311	0.203017	0.307647	1.09302	0.746518	-0.377146	-0.348864	-0.274026	-0.356035	0.408743	0.0270823	0.442062	0.684024	0.218714	-0.413407	-0.566845	-0.308719	0.557471	0.752403	0.368302	0.276604
A2MP1	-0.468213	-0.480216	-0.0335107	-0.483107	0.280825	0.110816	0.234806	0.0809295	-0.353074	0.0891411	0.220595	0.272268	0.936888	-0.137493	0.259603	0.108574	-0.230748	-0.411365	-0.268694	-0.348163	0.60843	-0.058913	0.141284	0.0636163
A4GALT	0.148638	-0.130951	-0.848824	-0.182766	2.04546	0.905021	-0.437796	-1.25574	0.241447	-0.581523	-0.596089	-0.070617	2.7007	1.28196	-0.250936	-1.36515	-0.227277	0.527726	0.664222	0.266576	3.57462	2.48165	0.0446734	-0.201815
A4GNT	-0.624345	-0.639815	-0.617159	-0.632522	0.0896105	-0.00034997	0.0992286	-0.0705747	-0.516937	-0.52323	0.360644	-0.547802	0.168691	-0.242172	0.123146	-0.0891077	-0.429269	-0.0234875	-0.630994	-0.529175	0.115799	0.622654	-0.0128199	-0.0817477
AA06	-0.498243	-0.478318	-0.445123	-0.523404	0.139833	0.0955729	0.229318	0.0957199	-0.374705	-0.378649	-0.266956	-0.27844	0.248235	-0.206516	0.269372	0.0816429	-0.248432	-0.40355	0.979868	-0.446824	0.921227	-0.110992	0.137676	0.057866
AAAS	0.208647	0.04006	0.00100364	0.365432	-0.325627	-0.684155	-0.643292	-0.340165	0.176176	0.142511	0.19849	0.386204	-0.25153	-0.414845	-0.898857	-0.668207	1.15941	0.879263	0.908771	1.42941	0.940629	0.943898	0.802751	1.04739
AACS	-0.0481354	0.20838	-0.0112008	0.506784	-0.996306	-1.28896	-0.565921	-0.0610072	-0.694315	0.17984	-0.193635	0.395541	-0.869074	-0.351236	-0.378497	-0.282555	2.55926	2.45568	2.3014	2.88774	1.67753	1.51441	1.92381	1.91094
AACSP1	0.299848	-0.741902	-0.694515	-0.765688	-0.010626	-0.190712	0.762591	-0.221939	-0.618065	-0.597135	-0.533068	-0.25652	0.0716936	-0.393596	0.0556296	-0.222218	0.943898	0.403078	-0.123205	0.573729	0.0149783	0.489947	1.12128	0.118373
AADAC	-0.401099	-0.380704	-0.35602	-0.223123	0.266092	0.440232	0.561946	0.414944	-0.273074	-0.28967	-0.146511	-0.199402	0.540465	0.220883	0.714819	0.412016	-0.123729	-0.293544	-0.0312213	-0.131202	0.6359	0.198388	0.567944	0.434663
AADACL2	-0.329285	-0.331165	-0.277873	-0.368438	0.196562	0.26444	0.36539	0.226422	-0.229216	-0.164288	0.0537077	-0.361683	0.369359	0.0626644	0.36516	0.168606	0.0103084	-0.174446	-0.196269	-0.332709	0.378957	0.0366486	0.287802	0.218353
AADACL3	-0.204175	-0.0535171	0.282394	-0.115431	0.627976	-0.0237402	0.0556357	-0.502687	-0.0832092	0.392083	0.268307	-0.0487275	0.286242	0.626283	0.187297	-0.202009	-0.258053	-0.541885	-0.534821	-0.774733	-0.138324	-0.120738	-0.308344	-0.63034
AADACL4	-0.65115	0.204648	1.05457	0.165225	0.644213	0.72658	0.0734213	0.985865	0.272268	-0.507048	0.0589684	0.133676	0.0409453	-0.38959	1.84552	-0.18208	-0.373933	-0.656366	-0.949241	-0.313912	0.0295218	-0.345798	0.907901	0.548132
AADACP1	-0.40669	-0.581497	-0.0238258	-0.530761	0.26742	0.0884724	0.342655	0.42797	-0.461384	0.0398212	-0.313062	0.0555572	0.701243	0.477329	0.468479	0.260267	-0.353609	-0.57461	-0.441832	-0.520559	0.223971	0.269564	0.179357	0.0266122
AADAT	-0.841998	-0.766392	1.68243	-0.659336	-0.0743383	0.0199551	0.129338	-0.14591	-0.655811	-0.67992	-0.480183	-0.675394	0.181145	3.67639	0.124085	-0.195132	-0.599071	-0.853635	-1.02368	-0.811199	0.242201	-0.200705	0.0190337	-0.0825735
AAGAB	0.371751	0.129175	0.334001	0.48919	-0.316431	0.239128	-0.257527	-0.198584	-0.0616839	-0.384286	-0.42473	0.0360473	-1.10994	-0.311933	-0.540047	-0.633091	1.06587	0.701588	0.4	0.765784	-0.336651	0.530682	0.68055	-0.543938
AAK1	-0.729378	-0.769716	-0.791725	-0.455641	-0.780672	-1.21416	-0.320704	-0.788509	0.0674635	0.395414	-0.236258	-0.108343	-0.876261	-0.660486	-0.17118	-0.10688	2.22881	1.6895	1.73359	2.1119	1.62412	1.67142	1.2125	1.29455
AAMDC	0.0551313	0.292321	0.279897	0.0544608	0.346237	0.166992	-0.29919	-0.369715	-0.0202743	-0.383105	-0.113466	0.0157829	-0.431136	-0.258899	-0.793876	-0.801247	0.657295	0.540719	0.110986	0.859808	0.0584987	0.536669	0.561295	0.0444254
AAMP	0.267063	-0.0227304	0.0958853	0.277362	-0.740194	-0.630299	-0.599291	-0.498445	0.275701	-0.0336386	0.146022	0.479041	-0.407718	-0.742012	-0.72805	-0.78589	1.32793	1.13325	1.04819	1.2269	0.163559	0.47433	0.809502	0.648642
AANAT	-1.1256	-0.573317	-0.568106	-1.04214	-1.58309	-1.46548	-2.37288	-2.34365	0.642474	0.469891	0.451402	0.578875	-1.44478	-0.216523	-0.549475	-0.812267	0.630867	0.941048	0.378579	0.602813	-0.0743442	0.347761	0.0475668	-0.072382
AAR2	-0.725601	0.16425	-0.816287	-0.705436	-0.279873	-0.503435	-0.215058	-0.678973	-0.871037	-0.059166	-0.669635	-0.557166	-0.222456	-0.584974	-0.214803	-0.456585	1.32293	1.08936	0.617113	0.656705	-0.0171194	0.612543	1.11128	0.637431
AARD	-0.718592	-0.727424	-0.707963	-0.790526	0.0765821	-0.179855	0.024463	-0.26401	-0.60006	2.012	-0.564874	0.181145	0.10822	-0.39846	0.0391	-0.235782	-0.556181	-0.777842	0.55461	-0.721634	0.0291615	0.810221	-0.0998496	-0.180197
AARS	-0.0835724	-0.288129	-0.544792	0.266183	-0.168698	-0.825806	-1.00786	0.299152	-0.3012	-0.521852	-0.555355	0.178349	-0.445787	-1.13633	-1.76283	0.0371365	2.81115	2.30809	2.34824	3.12604	2.67058	2.23694	1.8922	2.47525
AARS2	0.30294	0.0979199	0.17765	0.220817	-0.432635	-0.284645	-0.940136	-0.311287	0.19783	0.194837	0.211554	0.364752	-0.224253	0.280226	-0.702814	-0.0532761	0.309798	-0.126133	-0.220458	0.148477	-0.115247	0.391486	-0.159336	0.751839
AARSD1	0.242541	0.117508	0.276555	0.271515	-0.45675	-0.622323	-0.67293	-0.39921	0.0610531	-0.0428358	0.216879	0.292026	-0.35776	-0.302568	-0.758739	-0.225598	0.51191	0.0698801	0.379112	0.453515	-0.00262759	0.306453	0.287438	0.52766
AASDH	0.301085	0.351896	-0.198126	0.250157	0.250896	-0.572735	-0.596202	-0.0109179	-0.0216456	0.33474	-0.0754853	0.389719	-0.00114881	0.437802	-0.173843	-0.234329	0.158848	-0.138706	-0.66348	0.227266	-0.0993071	-0.819252	-0.192427	-0.71766
AASDHPPT	-0.0851329	-0.406037	-0.235012	0.0999126	0.330214	0.468689	-0.538642	0.38923	0.11433	-0.13879	-0.0510725	0.234783	0.122326	0.32376	-0.601038	0.640827	0.279322	-0.0180461	0.140127	0.409192	0.421988	0.304068	0.11679	0.987368
AASS	-0.0618809	0.0394856	0.377399	0.76007	-0.450899	-2.2237	-0.0683976	-1.22379	2.07165	2.31543	1.74697	2.63938	0.609741	0.963005	0.00744525	1.42264	0.091674	-0.727305	-0.252437	-0.689611	0.0898794	-0.902561	-0.819507	-0.985884
AATBC	-0.212617	-0.276926	0.407577	-0.35602	0.0592268	-0.113807	0.137241	0.0526069	-0.208126	0.0222227	0.181145	0.0944328	0.349675	0.326834	-0.198394	0.434427	-0.440989	-0.514795	1.08905	-0.0841802	-0.343035	0.116319	-0.169296	-0.424163
AATF	-0.00266455	-0.033288	0.0227612	0.107333	-0.106873	-0.163204	-0.358679	-0.134167	0.0287808	-0.238463	-0.230841	0.218468	-0.23119	-0.45757	-0.640332	-0.507804	0.492796	0.26195	0.364767	0.565374	-0.0347007	0.397725	0.351173	0.520065
AATK	0.666215	0.426205	0.461951	0.275781	0.0479037	-0.0435646	-0.115285	-0.385551	-0.616442	-0.877505	-0.746975	-0.62943	-0.096465	-0.196176	-0.0766858	-0.422372	-0.114937	0.184098	0.292368	0.0288469	-0.130851	-0.342003	-0.154522	-0.297486
ABAT	0.434477	0.484651	0.149639	0.588224	-0.964321	-0.596202	0.0759288	-0.356079	0.931805	1.45963	0.375561	1.24516	-0.418706	-0.317773	0.127342	0.46746	-1.26444	-1.04177	-0.0765417	-1.35419	-1.22374	-0.840781	-1.51225	-1.47038
ABCA1	0.768863	0.644788	1.78986	0.716191	-1.23347	-0.50196	-0.894322	-0.741977	1.74901	2.11708	2.73761	1.88118	0.170879	0.389719	1.10771	1.44321	-1.86569	-3.33029	0.0146214	-1.27089	-3.0325	-2.06839	-1.37315	-1.09074
ABCA10	0.80386	0.285523	1.27805	-0.235107	0.941693	-0.369437	0.635635	-0.236474	-0.186624	-0.0902393	-0.266826	-0.62844	1.32699	-0.464774	-0.0192733	-0.42473	-0.126313	-1.00912	0.538776	-0.760486	-0.123071	-0.473017	-0.153062	-0.287651
ABCA12	-0.28276	-0.282822	-0.268525	-0.281126	0.438134	1.58113	0.412154	0.300434	-0.15716	-0.160414	-0.111247	-0.222027	0.598494	0.19723	0.476706	0.362373	0.021672	-0.151749	-0.097154	-0.109048	0.594032	0.191729	0.367146	0.320038
ABCA13	0.468474	-0.655943	0.171484	-0.746257	1.87283	-0.171334	0.362923	-0.181079	-0.546054	-0.386882	0.439481	-0.646653	2.7297	-0.355044	0.110563	-0.190796	-0.478456	-0.160534	-0.548775	0.181137	1.65626	-0.298246	0.210517	0.260524
ABCA17P	-0.347291	-0.451996	-0.423995	-0.377816	0.229246	0.228934	0.32291	0.21038	-0.266321	-0.33562	-0.248102	-0.332983	0.37146	0.00174504	0.397505	0.215774	-0.188722	0.0331976	-0.171066	0.10815	0.725805	0.0331038	0.280937	0.190862
ABCA2	0.731686	0.295671	0.578472	0.657457	-0.521579	-0.847334	-0.339577	0.459123	0.340373	0.097166	0.235671	0.102672	-0.167979	0.350069	0.0492866	0.589836	-1.51619	-0.352685	0.293211	-1.58881	-1.23684	-1.35888	-1.05773	-1.10176
ABCA3	1.37156	1.01607	1.1509	1.35097	0.753963	0.153991	-0.200266	1.02326	0.266309	-0.810093	0.131146	-0.0328854	0.906224	-0.265	-1.02265	0.199377	0.106941	-0.30347	-0.634552	0.941535	-0.686417	-0.547378	-1.85713	-1.1036
ABCA4	-0.760753	-0.74461	-0.693504	0.643823	0.00517399	0.0659166	0.197705	0.389273	-0.662055	-0.634108	-0.50589	0.00294046	1.14668	-0.178814	0.28097	0.827744	-0.596933	-0.819507	-0.656366	-0.508277	0.927601	-0.135458	0.154775	0.506491
ABCA5	0.300633	0.261888	0.434647	0.370459	-0.790687	0.184107	-0.884684	-1.05928	0.266694	0.278634	0.344302	0.479854	-0.430663	0.452868	-0.528463	-1.32454	0.0853642	0.98885	0.254441	0.48416	-0.834008	-0.404897	-0.754583	-0.885597
ABCA6	-0.0727202	-0.816672	0.948367	0.338608	-0.0703182	0.910587	0.415002	0.432518	-0.945037	-1.11113	-0.798736	-1.67646	-0.387591	0.48241	-1.34869	-1.72042	-0.752728	1.26175	3.18859	1.3994	-1.1581	-0.464715	0.615324	-0.141902
ABCA7	0.409299	-0.00970505	0.195095	0.339631	-0.224308	0.229661	0.0545985	0.874687	0.208318	0.256294	0.115327	0.264703	-0.449138	0.561792	0.0232873	0.489706	-0.40529	-0.248577	-0.166772	-0.336089	-1.31054	-0.807631	-1.17879	-0.751513
ABCA8	-0.292078	-0.257905	-0.276638	-0.24627	0.35769	0.352261	0.544007	0.341973	-0.247203	-0.234383	-0.131571	-0.225304	1.00378	0.195066	0.765264	0.360913	-0.0836582	-0.232605	0.0459215	-0.110907	0.550111	0.160617	0.952527	0.336322
ABCA9	0.731329	0.806711	0.841883	0.837681	-0.537021	0.0817851	-0.134757	-0.521681	0.669133	0.838781	0.806781	0.702846	-0.731362	0.0186399	0.109613	-0.333131	-0.237588	-0.240987	-0.269648	-0.361641	-1.0933	-0.679958	-0.903196	-1.268
ABCB1	0.35566	0.519555	0.0943141	0.398044	-1.14966	-1.32377	-0.334207	-1.13767	3.11634	3.81085	3.31014	3.98839	2.71281	2.62665	1.16377	2.23887	-1.82478	-0.0192586	-0.631711	-1.66829	-0.719817	-0.636827	-0.547147	-0.45091
ABCB10	-0.056877	0.104585	-0.404532	0.0410573	0.172423	0.149273	-0.644348	-0.305207	-0.0665392	0.392263	-0.130612	0.118415	-0.0872219	-0.793081	-0.370115	-0.409373	0.699037	0.801381	1.14374	0.916791	1.15255	0.209035	-0.0992132	-0.40529
ABCB11	-0.414809	-0.38873	-0.363093	-0.217898	0.269499	0.442321	1.0454	0.418168	-0.294157	-0.301105	-0.166788	-0.177142	0.527379	0.234369	0.725241	0.422528	-0.144914	-0.308182	-0.0602313	-0.125139	0.62148	0.211879	0.579209	0.431293
ABCB4	0.863943	0.0172271	0.633342	0.270655	-2.26615	-0.400924	-1.68664	-1.6612	2.46567	1.79715	2.19353	2.28266	0.332274	1.45911	0.866632	0.808289	-3.04839	-3.97911	0.472887	-2.80906	-5.77224	-4.05829	-4.46422	-4.61576
ABCB5	-0.43714	-0.33426	0.0459871	-0.163847	0.175189	0.205858	0.262897	0.133345	0.144728	-0.364765	-0.285086	-0.371336	0.307634	0.570543	0.386366	0.619617	0.104813	-0.156127	0.0191653	-0.262576	0.299125	0.0706554	0.338615	1.10232
ABCB6	0.0057205	-0.144013	-0.476465	0.0601335	-0.401836	-0.533121	-1.0431	-0.694644	0.228736	0.208078	0.0314758	0.609567	-0.216783	-0.0697609	-0.62344	-0.5213	1.76625	1.54551	0.945851	1.722	2.45054	2.13878	2.1519	2.21063
ABCB7	0.29169	0.11944	0.341872	0.313755	-0.525089	0.158024	-0.295712	-0.727652	0.454568	0.524321	0.366557	0.666649	-0.723342	0.264756	-0.332793	-0.446753	0.196618	0.203388	0.0722923	0.204336	-0.590398	-0.120957	-0.286513	-0.495151
ABCB8	0.0972218	0.380453	0.158534	0.139286	-0.289022	-0.036819	-0.569658	-0.399138	-0.144151	0.0763421	0.0914379	-0.0434429	-0.582451	0.123642	-0.727276	-0.845395	1.03939	1.00409	0.620021	0.912871	0.452994	0.742114	0.626147	0.632379
ABCB9	-0.0048644	-0.085755	0.136395	-0.222369	-1.00565	-0.54837	-0.513271	0.32521	-0.794433	-0.564943	-0.517032	-1.16308	-0.810093	-1.26738	-0.643856	-0.145618	3.64405	4.08083	3.56571	3.53856	2.83209	3.08553	3.95108	3.24472
ABCC1	0.20322	0.249203	0.216973	0.352605	-0.838953	-0.672004	-0.326568	-0.360085	-0.104073	-0.0750646	-0.313612	0.0776325	-1.15911	-1.26838	-0.579387	-0.754319	1.07709	0.958779	0.561295	1.17945	0.228217	0.434663	0.211046	0.637315
ABCC10	0.135964	0.222499	0.148721	0.109648	-1.00988	-0.686564	-0.499026	-0.235874	0.216757	0.382274	0.344813	0.317932	-1.02265	-0.386769	-0.321917	-0.0298229	0.377165	0.467995	0.227429	0.346465	-0.534619	-0.0543672	-0.255814	0.066986
ABCC11	-0.870108	-0.962761	-0.591734	-0.768729	-0.208485	-0.182529	0.575424	0.560487	-0.491151	0.759251	-0.594525	-0.722799	0.0297102	-0.0318253	0.963005	0.446966	0.162532	-0.152579	0.230045	0.121164	0.973747	0.476809	0.0654235	0.834853
ABCC12	-0.68124	0.288674	-0.673698	-0.697182	0.0489983	-0.0662	0.0616647	-0.141528	-0.57588	-0.576598	-0.533299	-0.0106187	0.12428	-0.292706	0.0826163	-0.161279	-0.505711	-0.735422	-0.719817	0.760533	0.0621256	-0.230888	-0.0535508	-0.116036
ABCC13	-0.441168	-0.470846	-0.399731	-0.40215	0.188413	0.219401	0.292832	0.195421	-0.354293	-0.330326	-0.238076	-0.365527	0.313988	0.0460846	0.367462	0.745794	-0.187225	0.143641	-0.316101	0.00416848	0.316091	0.00734234	0.248167	0.729982
ABCC2	-0.423269	-0.359988	-0.418343	0.156234	-0.398461	-0.474865	-0.449192	-0.253036	1.05767	0.253412	0.520878	0.0863576	-0.160806	-0.323858	-0.0870879	-0.156682	0.100607	0.391131	-0.0730138	0.112311	-0.156573	-0.343769	-0.207712	-0.104974
ABCC3	-0.39971	-0.404336	-0.346071	-0.45346	0.188744	0.171345	0.259535	0.427269	-0.300517	-0.281957	-0.18657	-0.400474	0.300216	-0.0117563	0.770645	0.128435	-0.133576	0.206042	-0.222042	-0.359018	0.283078	-0.0442737	0.18683	0.0964377
ABCC4	1.67475	1.53856	1.66603	2.31858	2.30677	0.318544	1.45739	1.17884	-1.22309	-1.11532	-1.22973	-0.1451	-0.525559	0.235922	0.791934	0.336452	0.108537	0.193191	-2.22575	0.0995747	-0.465938	-0.851983	-0.316165	-0.360474
ABCC5	0.191854	0.379732	0.445985	0.589892	-0.623032	-0.901805	-0.393802	0.0647176	0.310911	0.574597	0.544536	0.79065	-0.0745543	-0.369746	-0.155825	0.253528	-0.069078	0.0615441	0.143685	0.0964377	-0.738413	-0.919458	-0.846777	-0.68766
ABCC6	0.125614	-0.178268	-0.542196	-0.350083	0.0736744	-0.268574	-0.347967	-0.304882	-0.489254	-0.0624263	-0.494527	-0.153151	0.397384	0.175873	-0.184331	-0.301662	1.36286	0.682227	0.559169	0.29557	0.279789	0.137728	-0.222513	-0.421094
ABCC6P1	-0.130137	-0.517142	-0.442981	-0.576397	0.0548695	0.0632146	0.130892	-0.0123848	-0.391179	-0.373699	-0.297365	-0.509315	0.17162	-0.141451	0.130537	-0.037054	1.33028	-0.434235	-0.0842651	0.199931	0.0904042	-0.167099	0.00640273	-0.0809432
ABCC8	1.15436	-0.661247	-0.413309	0.230879	-0.796002	0.82086	1.21062	1.21405	0.285629	-0.196468	0.180528	-0.409873	1.09663	1.24234	1.06677	-1.22883	0.214112	0.0127833	-2.62924	1.11806	-0.594767	-0.989295	2.20686	-0.136064
ABCC9	-0.40747	-0.421358	-0.362901	-0.434358	0.555252	0.195165	0.28017	0.182319	-0.299779	-0.286634	0.156382	-0.404017	0.304386	-0.0331182	0.330315	0.138268	-0.136033	-0.302797	-0.227945	-0.378168	0.30892	-0.00286268	0.215817	0.126444
ABCD1	-0.0511196	-0.0318672	0.247207	-0.0191437	-0.715923	-0.564407	-0.19802	0.016211	0.418513	0.324026	0.528395	0.394315	-0.589625	-0.182765	-0.074963	-0.0607105	-0.129983	-0.0723283	0.250716	0.160174	-0.736949	-0.07007	-0.423138	-0.119257
ABCD2	0.178311	-0.219488	-1.58548	0.787099	1.24722	-0.783501	0.236724	-0.238691	-1.48509	-1.40577	-1.09764	-1.62823	-0.324314	-0.704878	-0.583108	-0.6496	0.855925	1.37648	0.663005	2.26991	2.26639	0.355575	1.32717	0.205596
ABCD3	-0.132841	0.392796	0.0167735	-0.112591	-1.30025	-1.54236	-0.283233	-1.07127	0.242377	0.732234	0.394718	0.215074	-2.38681	-0.909604	-0.0962059	-0.514007	0.50386	0.654371	0.220422	0.631592	-0.258197	-0.0445045	0.969873	-0.0135007
ABCD4	0.438725	0.210129	-0.0999454	0.244958	-0.417198	-0.132188	-0.916237	0.333794	0.269388	0.4012	0.575144	0.733658	-0.538148	0.383119	-0.423462	0.405961	0.211202	0.405289	0.709309	0.0851545	-0.437217	-0.564747	-0.887971	-0.651284
ABCE1	0.10208	-0.123905	-0.0946584	0.22323	0.0298073	-0.582228	-1.1315	-0.723429	0.219731	0.178432	0.15927	0.592431	0.131721	-0.316126	-0.984254	-0.0921441	0.695978	0.124226	0.1999	0.856118	1.07616	0.31536	0.403106	0.552312
ABCF1	0.063899	0.155025	-0.176887	0.183785	-0.0685953	-0.289343	-0.46749	0.174722	-0.124182	0.0541573	-0.383195	0.119677	-0.178153	-0.298827	-0.61738	-0.400331	0.91616	0.857196	0.682537	0.935027	0.7761	0.725805	0.715723	1.01432
ABCF2	0.138389	-0.00408417	0.113263	0.442192	-0.387819	-0.637884	-0.698386	-0.187467	0.0846514	0.0466108	-0.165163	0.414638	-0.00443239	-0.625859	-1.11773	-0.30728	0.807844	0.49219	0.504174	0.742356	0.515469	0.302308	0.462556	0.662559
ABCF3	-0.00237787	-0.0586255	-0.175555	0.0644718	-0.238062	-0.268677	-0.359561	-0.261613	-0.0570668	-0.0431579	-0.195871	0.197062	-0.310657	0.205347	-0.380329	-0.485536	0.784826	0.467485	0.546868	0.771276	0.465336	0.655813	0.313743	0.600858
ABCG1	0.640741	0.352028	0.516117	0.107643	-1.33521	-0.102609	-0.494135	-0.784705	1.31769	1.16045	1.28584	1.36385	0.266855	0.539283	1.57949	0.547034	-1.66829	-2.92248	0.0286618	-1.77274	-2.87669	-1.67172	-1.64898	-1.42284
ABCG2	-1.17684	-1.13691	-0.66065	-0.937043	-0.287515	-0.314748	1.15217	-0.355286	-0.764264	0.124888	-0.789199	-0.874765	-0.129314	2.05422	-0.0197705	0.781213	-1.00802	0.610712	0.544464	-1.05929	0.906867	0.834363	1.86417	0.889262
ABCG4	-0.688216	-0.698201	-0.661018	-0.62425	-0.110613	-0.0125622	0.138194	-0.00207601	-0.554134	-0.584974	1.30102	0.587829	0.142275	-0.271855	0.350853	-0.120436	-0.485155	-0.731719	-0.20995	-0.652596	0.0963842	-0.267345	0.0637186	-0.0348258
ABCG5	-0.540037	-0.380655	-0.00748824	-0.40837	-0.247741	0.642032	0.240362	0.280259	-0.490667	-0.817134	0.178155	-0.642285	-0.133715	0.422165	-0.0459471	-0.0117563	-0.698107	-0.0310086	-0.892102	-0.155162	-0.104794	0.822348	0.335672	-0.141684
ABCG8	-0.131519	-0.434926	-0.34726	0.163227	0.0633212	0.171276	0.238986	0.126233	-0.319598	-0.285304	-0.156682	-0.434877	0.230896	0.741247	0.227851	1.02608	-0.134961	-0.312771	-0.272188	-0.446988	1.10075	-0.0736135	0.137152	0.0590096
ABHD1	1.73914	1.98536	1.47186	1.76326	0.995419	1.49042	1.3169	1.18952	0.221351	0.482651	0.00852795	0.203775	-0.340136	0.262116	-0.289028	-0.463671	-1.10552	-0.343837	-0.218169	-0.917038	-0.57487	-0.878661	-1.24426	-1.178
ABHD10	-0.3176	-0.31362	-0.260152	-0.334194	0.814381	0.273772	0.380922	0.287575	-0.192699	-0.203625	-0.0184308	-0.292756	0.445477	0.133964	0.560337	0.257021	-0.0243121	-0.18361	0.0175504	-0.224763	0.429402	0.0466509	0.399845	0.266074
ABHD11	0.298659	0.0682817	0.0991281	-0.0156726	-0.96169	-0.644348	-1.15238	-0.79698	0.390934	0.110076	0.165351	0.285371	-0.658085	-0.607184	-1.33641	-0.715016	0.72081	0.757422	0.523144	0.665048	0.388354	0.693246	0.486298	0.595363
ABHD11-AS1	0.0631801	0.264307	-1.24036	0.191283	-1.00287	1.92921	1.56463	1.28649	-0.923846	-0.306673	-1.60039	-0.856019	-1.03941	0.778339	0.160527	0.0953322	0.823497	0.981646	0.740919	0.532327	-0.841251	0.817952	-0.850779	-0.408109
ABHD12	0.298329	-0.00717845	-0.108405	-0.0524373	-0.507105	-0.982189	0.102799	0.264552	0.203192	0.0540385	-0.219258	0.0515502	-0.426433	-1.14079	-0.86988	-0.197272	1.36894	1.47473	1.26385	1.64369	1.58468	1.22005	1.51148	1.43708
ABHD12B	-0.585038	-0.592916	-0.552473	-0.485892	0.0723559	0.135113	0.228695	0.108526	-0.485911	-0.353603	-0.338591	-0.053643	0.226614	0.289214	0.225274	0.0544803	-0.350376	-0.560557	-0.58482	-0.485691	0.219466	0.839008	0.116973	0.0645497
ABHD13	-0.38358	-0.406845	-0.149227	-0.213152	0.354639	0.429934	0.511502	0.389434	-0.303184	-0.284447	-0.16462	-0.143555	0.5385	0.233241	0.564824	0.420311	-0.124615	-0.281003	-0.277636	-0.106251	0.590632	0.221644	0.455982	0.413544
ABHD14A	0.20146	0.0544608	0.331544	-0.00373085	-0.64115	0.517651	-0.254599	-0.403204	-0.183881	-0.850856	-0.649983	-0.183794	-0.850617	-0.0666127	-0.890055	-0.563024	1.16631	1.07731	1.01021	1.19438	0.158443	0.866595	0.846783	0.194495
ABHD14B	0.441938	0.384529	0.785527	0.425545	0.300604	0.346704	-0.0651508	-0.328012	0.192915	0.0494631	0.228244	0.27369	0.142929	-0.131647	-0.436755	-0.517845	0.17371	0.334387	0.166513	0.295878	-0.37605	-0.260554	-0.471233	-0.631287
ABHD15	0.467326	0.407808	0.723708	0.484053	-0.136769	0.156011	0.130074	-0.344172	0.263356	0.718829	0.808853	0.399709	-0.65882	-0.444727	0.824366	-0.671822	-0.596124	-0.32058	0.186242	-0.0616395	-0.709941	-0.99681	-1.13229	-1.27218
ABHD16A	0.213002	0.204202	-0.0610072	0.447454	0.484142	-0.603247	-0.402726	0.607541	0.143119	0.194286	-0.0745543	0.346352	0.0901708	-0.599657	-0.554085	0.103867	0.314527	0.19294	0.161021	0.377599	0.157573	0.255063	-0.10887	0.227703
ABHD16B	0.267328	0.464378	0.147113	-1.34265	0.666824	0.98245	0.63637	0.0878469	0.144764	-0.724561	-0.0609306	-0.0840868	-0.38959	0.612994	0.00469017	0.549466	-1.15743	-0.0683398	-0.09366	0.374017	-0.310403	-0.512016	-0.210559	1.33395
ABHD17A	0.530257	0.180174	0.393856	0.572495	-0.357926	-0.267705	-0.164249	0.224044	0.429698	0.164791	0.303141	0.467519	-0.426634	-0.319764	-0.521852	-0.271762	0.174839	0.296556	0.159312	0.168957	-0.591811	-0.347421	-0.579985	-0.318015
ABHD17B	-0.36253	-0.175164	-0.0726719	-0.386254	0.0141772	-1.13964	0.0507709	-0.800992	0.0676224	0.604411	0.840809	0.237628	0.0676224	-0.506134	0.466389	-0.269611	0.256821	0.580801	0.448256	0.191729	-0.105748	-0.50611	-0.208313	-0.76682
ABHD17C	-0.197771	0.334324	-0.248868	0.0630551	-1.03009	-0.0648351	-0.367579	-0.269448	-0.841547	0.384487	-0.736674	-0.170466	-1.55248	-0.936126	0.165187	-1.36842	0.2707	1.64756	1.51548	1.26292	0.469656	0.996929	0.910722	1.67975
ABHD18	0.106921	0.0230619	-0.235706	0.367825	-0.547501	-0.957368	-0.837248	-0.129693	0.0310508	0.263502	-0.10315	0.427567	-0.604075	-1.47122	-0.694071	0.13935	0.848832	0.313412	0.451376	0.936444	0.410723	-0.238695	-0.326244	0.579078
ABHD2	0.416554	0.251004	0.00577037	0.592774	-0.398736	-2.24657	-2.03933	0.548773	0.373514	0.112504	0.285318	0.717883	-0.453736	-2.03707	-2.51962	0.647958	1.32444	1.43751	1.38138	1.39627	-0.297027	-1.08363	-0.456762	-0.576793
ABHD3	0.132508	-0.03838	-0.151004	0.124963	-0.0437028	-0.788982	-0.963283	0.185926	0.0516574	0.250178	0.0190412	0.183802	-0.396611	-0.824784	-1.05552	0.0473261	1.95669	1.71245	1.6895	2.05376	1.91447	1.15192	1.27932	1.70701
ABHD4	-0.246774	-0.71931	-0.937281	-0.159343	-0.471136	-0.367521	0.371504	0.499075	-0.478697	-0.959477	-1.08394	-0.299484	-0.0940705	0.16172	-0.212706	-0.046111	0.750201	0.931457	0.792305	0.816944	-0.29218	-0.166013	-0.125231	-0.485815
ABHD5	-0.234004	-0.23937	-0.314866	0.165255	0.774416	-0.265913	0.993282	0.116615	-1.1664	-1.59285	-1.48509	-1.40916	-1.34131	-1.47909	-0.684428	-2.11192	1.4503	1.24672	0.987368	1.53173	1.46497	1.21367	1.52038	1.60585
ABHD6	1.10213	0.563446	1.15365	1.49726	0.734101	0.630889	-0.536587	0.229806	0.363262	0.086179	-0.297022	0.701411	1.15091	0.496135	-0.345529	-0.108844	-1.40097	-1.89222	-1.50517	-0.902329	-1.11132	-1.5931	-1.30928	-1.02395
ABHD8	-0.107085	-0.362901	-0.27851	-0.305303	-0.628089	-0.0700973	-0.251113	-0.835743	0.264541	-0.0710896	0.0917213	0.171833	-0.368022	-0.0447669	-0.36484	-0.460316	0.494737	0.687663	0.545586	0.674642	0.0164401	0.716458	0.876937	0.481379
ABI1	0.435816	0.377234	0.364319	0.659582	0.637643	0.562069	-0.203681	0.486793	0.218372	0.172309	0.13086	0.388707	-0.11687	-0.292756	-0.306117	0.0157829	-0.0844692	0.0682897	0.237305	0.219153	-0.670542	-0.924461	-0.782371	-0.952153
ABI2	0.526769	0.87872	0.852397	0.909142	-1.21458	-0.282522	-0.985532	-0.27137	0.356001	0.820291	0.545745	0.589698	-1.09764	-0.143712	-1.43497	-0.0811165	0.0940481	0.246704	0.73779	0.168775	-1.46419	-0.70003	-2.06735	-0.793214
ABI3	0.226619	-0.134513	0.231917	0.622428	-0.978432	0.540748	-1.23847	0.216775	0.0184804	-0.488765	-0.799554	0.571914	0.13086	0.664596	-0.703807	0.34194	0.226405	0.226852	-0.226591	0.186932	-0.264915	0.628135	-0.363184	0.406179
ABI3BP	-0.468162	-0.474359	-0.432911	-0.493544	0.181931	0.125385	0.21649	0.156355	-0.154518	-0.00345312	-0.286838	-0.426778	0.264505	0.233484	0.234055	0.133964	-0.222219	-0.231147	-0.327691	-0.233901	0.758008	2.05293	0.116921	0.0469724
ABITRAM	0.27425	0.257497	-0.560255	0.0135075	-0.732949	-0.836539	-0.339945	-0.301493	1.17741	0.45547	0.626484	0.873055	0.0993497	-0.375102	-0.18043	-0.106812	-0.111461	0.444267	0.956493	0.55926	-0.0891723	-0.354663	-0.321449	-0.39592
ABL1	0.157176	0.38708	0.325568	-0.0625871	-0.537991	-0.613732	-0.335722	-0.46891	0.527433	0.611232	0.691654	0.275763	-0.325946	0.0632519	-0.383424	0.175567	0.102164	0.1944	0.360229	0.0787312	-0.537481	-0.356036	-0.469169	-0.0767941
ABL2	0.410413	0.525248	0.550502	-0.0837481	-0.584316	-0.338589	-0.594777	-1.11214	0.861752	1.02203	0.818112	0.462309	-0.238607	0.297457	0.158312	-0.335067	-1.0573	0.147773	0.309943	0.0077859	-0.488713	-0.346332	-0.718663	-0.524837
ABLIM1	0.380624	0.210085	0.52808	0.102453	-0.315196	-0.442333	-0.295985	-1.12912	0.322899	0.418889	0.522845	0.316956	0.256212	0.439162	0.153236	-0.199659	-2.95037	-3.58912	-1.63636	-3.25456	-3.64395	-4.04484	-3.09069	-4.08858
ABLIM2	1.24235	1.12587	1.26416	0.399253	-1.22334	-0.843405	-0.886281	-0.469886	2.25172	1.35592	2.0063	1.72826	0.685675	0.189862	0.120872	1.29917	-2.0199	-2.47555	-0.958983	-2.46486	-1.5581	-1.83823	-1.5605	-1.58547
ABLIM3	-0.100786	0.171624	0.149353	-0.108683	0.0473335	-0.607453	0.387589	-1.12092	-0.00881462	0.0164638	0.122608	-0.0478038	-0.0864003	-0.363	-0.0339859	-0.778823	0.383906	0.176927	0.188512	0.0236363	0.19188	1.66226	-0.646055	-0.287018
ABO	1.04198	-0.232624	0.529206	-0.206902	0.395878	-0.359852	0.239531	0.182245	1.78828	-1.25875	1.32589	-1.08786	0.186944	0.263994	-0.468588	-0.511565	0.161287	-0.380884	0.227192	-1.36615	-0.158782	0.154841	-0.136903	-0.491073
ABR	0.0761135	0.24079	0.290331	0.102287	-0.328036	-0.229832	-0.190753	0.0823478	0.921762	1.11338	1.27907	1.06841	0.13241	0.546301	0.638631	0.672637	-0.44309	-0.432798	-0.700348	-1.01497	-0.818849	-1.03584	-1.35208	-0.87546
ABRA	-0.695544	0.293332	-0.370843	-0.81033	1.84897	-0.179214	0.0267684	-0.234149	-0.608257	-0.581954	-0.480364	0.493639	0.0211244	-0.272889	0.0458356	-0.26282	-0.477284	-0.763144	-0.866357	3.58498	-0.00267983	-0.341731	0.294343	-0.183231
ABRACL	-0.681508	-1.17718	-1.69306	-0.758623	-0.116118	-0.266302	-0.275666	-0.440969	0.244672	-0.600749	-1.04604	0.186296	-0.493171	-0.468249	-0.704761	-0.531907	1.74704	1.43796	1.19474	1.24957	0.962763	1.00109	1.01083	0.841315
ABRAXAS1	0.224408	0.174892	0.269201	0.36874	0.0255112	-0.300424	-0.728141	-0.696645	1.02911	0.788964	1.03365	1.20987	0.210538	-0.11005	-0.248836	0.746645	-0.885597	-0.913814	-0.525932	-0.453508	-1.32881	-2.09231	-1.37838	-1.41793
ABRAXAS2	0.205339	0.133345	-0.0224893	0.696656	0.107407	-0.403793	-0.292977	-0.666727	0.025468	0.235132	0.00660004	0.602225	-0.116979	0.0140976	-0.547717	-0.400101	0.424854	0.375401	0.346612	0.549652	0.0098682	-0.205911	-0.427812	-0.371438
ABT1	0.0385954	0.284465	0.410181	0.239634	-0.858059	-0.502142	-0.397618	-0.587077	0.252038	0.284573	0.218582	0.499524	-0.74972	-0.130014	-0.239258	-0.166476	0.235816	-0.0233449	0.417065	0.485274	-0.547822	-0.466542	-0.201815	-0.45063
ABTB1	0.459123	0.240038	0.275461	0.191503	-0.346947	0.235822	0.595203	-0.094808	0.607475	0.282747	0.492431	0.430198	-0.469802	0.356883	0.0204693	-0.455442	0.0772109	0.0598795	0.190024	0.00468655	-1.65129	-1.34837	-1.30259	-1.74029
ABTB2	-1.44292	-1.19786	-0.999935	-1.11411	-1.79041	-1.01672	0.391454	0.159578	-1.079	-0.648344	-1.04168	-0.280343	-0.8599	-0.0646891	-0.190833	0.943044	0.778129	1.34065	0.262574	0.896879	1.61866	1.81751	1.90119	2.66609
ACAA1	0.0119634	-0.126892	-0.153173	-0.0250331	0.00282323	-0.354604	-0.253452	0.261441	-0.0381405	-0.10485	-0.267764	0.0324917	-0.280409	-0.355622	-0.465116	-0.11584	0.335737	0.359493	0.184269	0.391262	-0.100823	0.065918	-0.0981194	0.0308192
ACAA2	0.0818954	-0.0672104	0.212307	0.453083	-0.275422	-0.415701	-0.116422	0.0715889	-0.190996	-0.826286	-0.291757	0.07736	-0.655401	-0.871347	-0.766103	-0.986355	1.33958	1.13521	1.29183	1.59757	0.802133	0.556641	0.443532	0.765325
ACACA	0.0821358	0.27049	0.011134	0.204202	0.355005	-0.486966	-0.141893	-0.570092	0.113491	0.0368271	0.127264	0.185633	-0.31323	-0.613401	-0.310413	-0.00511431	0.500836	0.169255	-0.512456	0.504008	0.920133	0.22306	0.885159	0.2125
ACACB	0.656835	0.770541	1.12806	0.277242	-0.833414	-0.145787	-0.456368	-0.11254	1.02036	0.274033	0.943044	0.25192	-0.878075	0.674298	-0.267088	-0.344834	-0.849342	0.0586815	0.210378	-0.302352	-1.11237	-0.463984	-0.57757	-0.379752
ACAD10	0.219659	0.232948	0.156722	0.402997	-0.598269	-0.541305	-0.368866	-0.425989	0.367953	0.289475	0.193399	0.407198	-0.365214	-0.523815	-0.447248	0.259937	0.35493	0.241569	0.460386	0.43814	-0.2179	-0.361641	-0.283259	-0.343769
ACAD11	0.149396	0.436374	0.421472	0.500258	-0.895646	-0.754584	-0.901572	-0.283087	0.207008	0.314065	0.172807	0.241551	-0.914663	-0.238375	-0.858418	-0.183794	0.945545	1.07469	1.0091	0.935382	-0.399736	-0.357526	-0.791516	-0.230124
ACAD8	0.256555	0.101923	-0.142898	0.463011	-0.565268	-1.26943	-0.799606	0.643823	0.188587	0.142275	-0.232733	0.160527	-0.612074	-1.49304	-0.914663	0.174462	0.955653	0.807686	1.10286	1.20189	0.058356	0.0773702	-0.310176	0.627172
ACAD9	0.123282	-0.0451623	-0.0721323	0.177191	-0.443831	-0.374101	0.565407	-0.132478	0.0620368	-0.0603034	-0.269543	0.154839	-0.500046	-0.432608	0.329582	-0.311933	0.704647	0.451376	0.289258	0.767758	0.383703	0.533268	1.1132	0.608727
ACADL	-0.357464	-0.577724	0.384311	-0.508784	0.716191	0.0596522	0.218671	0.369984	-0.457161	-0.146955	-0.394708	-0.436166	0.262976	-0.211761	0.265361	0.0613604	-0.361669	-0.555986	-0.295973	-0.392555	0.224884	-0.106655	0.141187	0.0321647
ACADM	-0.113919	-0.126717	-0.0760319	0.185517	0.441642	-0.292579	-0.993836	-0.0635553	-0.344923	-0.757476	-0.996125	-0.32175	-0.0776263	-0.339591	-1.17593	-0.566379	0.955378	0.907281	0.736724	1.02336	1.22528	0.589851	0.363026	0.939829
ACADS	0.230286	0.0356535	-0.138289	0.0305917	-0.253135	-0.083962	-0.654423	-0.477491	-0.116523	-0.607892	-0.505601	0.245062	-0.160634	-0.756841	-1.23937	-1.6456	1.30471	1.39655	1.34065	1.46536	1.01134	0.936058	0.709459	0.544333
ACADSB	0.4812	0.412752	0.479687	0.34864	-0.314935	-0.322878	-0.647526	-0.563498	0.496004	0.398272	0.40439	0.581402	-0.140068	-0.0178838	-0.492647	-0.391252	-0.000390283	0.166169	0.385337	0.255599	-0.320229	-0.518236	-0.452351	-0.557767
ACADVL	-0.0313345	0.174658	-0.0333583	0.240073	-0.261613	-0.262604	0.243656	0.586669	-0.106515	0.0981059	-0.189282	0.17866	-0.507339	-0.337726	-0.324314	-0.25622	1.60644	1.53586	1.48982	1.77711	1.07887	1.00997	1.21054	1.48462
ACAN	0.203065	0.844116	-0.1654	-0.411626	-0.796163	0.54988	0.825963	-0.437796	0.0537077	0.142162	1.14856	0.147111	-0.0476287	0.565354	0.00517487	-0.553246	-1.17567	0.183501	0.27995	-0.798959	-0.322861	-0.192329	0.00851362	-0.635434
ACAP1	0.373408	0.640593	0.475074	0.547019	-0.0291553	-0.428525	-0.125692	0.483642	0.164354	0.390318	0.159237	0.257538	-0.137208	-0.513844	-0.426433	0.0602786	0.241146	0.28171	0.299281	0.114968	-0.598838	-0.657895	-0.747685	-0.561563
ACAP2	0.257497	0.310219	0.280756	0.466383	-0.305592	-0.94639	-0.709614	-0.0976454	0.453491	0.61843	0.436124	0.630636	0.100825	-0.167916	-0.139472	0.424891	-0.380057	0.00920826	0.165941	0.0511539	-0.763082	-1.33038	-1.07421	-0.70282
ACAP3	0.505061	0.413176	0.454327	0.289598	0.693326	0.679934	0.774674	-0.0452541	-0.095694	-0.310607	-0.396773	-0.16267	-0.00505124	0.281469	-0.0246343	-0.684015	0.292949	0.162055	0.163699	0.248698	-0.206649	0.292451	0.189099	-0.21271
ACAT1	0.0411176	0.178311	0.131612	0.456286	0.418621	-0.693622	-0.558596	-0.352257	-0.378436	-0.541413	-0.753591	-0.117973	-0.626012	-1.18591	-1.47952	-1.28558	1.86071	1.77047	1.60835	2.0123	1.81503	0.972971	1.16511	1.32573
ACAT2	-0.290032	-0.447958	-0.352257	0.221494	-0.14406	-0.133079	0.474257	0.303851	-0.353603	-0.566269	-0.593443	0.0759819	-0.284239	-0.355841	-0.207917	-0.239102	0.726417	0.274255	-0.328539	0.662692	0.497338	0.729726	1.48659	0.943646
ACBD3	0.401444	-0.17754	-0.111491	0.374876	-0.237417	-0.697503	-0.929478	-0.52621	0.536025	0.201025	0.139118	0.510775	-0.372897	-0.526029	-1.07394	-0.314241	0.793869	0.452994	0.640462	1.10505	0.0131424	-0.197147	-0.149338	0.189747
ACBD3-AS1	0.426758	0.0891872	-0.0976977	1.09162	-1.18959	-0.488076	-0.213019	0.505176	0.295222	0.299411	0.327739	0.954972	-2.28821	0.843838	-0.878294	0.174572	0.391776	0.198838	-0.0209949	-1.11519	-0.402213	0.0794388	-0.755526	-0.667042
ACBD4	0.105208	0.20322	0.121334	0.0911083	-0.519984	-0.423995	-0.607453	-0.250417	0.207169	0.163247	0.258656	0.255457	-0.176357	0.230783	-0.623786	0.0737235	0.399845	0.486692	0.320728	0.723805	-0.153909	0.452571	-0.352145	-0.437938
ACBD5	-0.164805	-0.000209183	-0.0216467	-0.369919	-0.62425	-0.260281	-0.0272477	-0.509776	0.410071	0.083146	0.0695156	-0.335461	-0.6496	-0.238137	-0.127642	-0.69857	0.30201	0.33793	0.265943	0.0642757	-0.20995	0.0312104	-0.0360764	-0.15326
ACBD6	0.447556	0.544007	0.602065	0.392796	-0.417608	-0.24287	-0.620367	-0.45111	0.376807	0.479814	0.566346	0.345755	-0.545006	-0.531246	-0.641742	-0.622327	0.0572607	-0.0107426	0.157323	0.159665	-0.534821	-0.50222	-0.834683	-0.631759
ACBD7	-0.644546	-0.49086	-0.367328	-0.692256	1.13684	-0.28854	0.343365	-0.0970641	-0.313183	-0.344923	-0.452989	-0.85191	1.46854	0.70072	0.427332	0.580152	0.201804	-0.183105	-0.483491	0.425557	1.8026	0.576703	0.403306	0.247927
ACCS	-0.342827	0.804132	0.913402	-0.043518	-0.76054	0.729154	0.544588	-0.260152	-0.23119	1.02184	1.08712	0.237924	-0.310047	0.757552	0.455989	-0.627339	-1.97361	0.450835	1.15506	-1.5373	-2.25745	-0.377563	-0.787636	-1.86914
ACCSL	-0.869235	-0.851577	-0.799127	-0.88905	0.503169	-0.312458	-0.0513366	-0.328147	0.26989	0.0306196	-0.528555	0.297942	-0.056559	0.662825	-0.013454	-0.398269	-0.690198	-0.960419	-0.910776	-1.01078	-0.101476	0.144689	1.28479	-0.246709
ACD	0.319353	0.16214	0.145686	0.171655	-0.237559	0.0154254	-0.607648	-0.300745	0.440836	-0.0479067	0.0451575	0.279411	-0.30539	0.0114089	-1.06959	-0.336744	0.389201	0.0992073	-0.434424	0.341452	-0.10096	0.318505	0.138558	0.323403
ACE	0.132834	0.116131	0.0635131	0.119064	1.23667	1.38551	0.812641	0.933434	-0.830556	-0.586154	-0.762336	-0.71589	0.504677	0.494396	-0.157222	-0.0291612	-0.566506	-0.179428	-0.863654	-0.574776	0.0262373	0.29557	-0.283744	-0.35078
ACE2	-0.821249	4.41928	-0.749855	-0.580246	-0.0680153	0.0491554	0.172158	0.0277442	-0.707988	-0.688543	-0.532737	-0.531599	0.140157	-0.133944	0.247136	-0.0779674	-0.65842	-0.902225	-0.821931	-0.621383	0.137282	-0.171971	0.125335	-0.0209089
ACER1	-0.111019	-0.415225	0.361526	-0.416436	-0.283897	1.22194	0.405087	0.167523	-0.106143	0.14103	0.107804	-0.395413	-2.50499	1.75186	0.471833	0.500836	0.26461	-0.112843	0.34715	-0.377824	-0.172385	1.01083	1.20167	0.244283
ACER2	0.347849	0.417147	-0.029745	-0.211025	-0.791838	-0.053349	-0.555917	-0.768565	-0.0840868	0.129313	0.451908	0.444842	-0.410052	0.87558	-0.768498	0.00341999	0.545816	-0.0731482	-0.266393	0.126444	-0.0549615	0.325085	0.427063	-0.339763
ACER3	0.762422	0.988467	0.193097	0.259956	-1.38728	-1.63042	-0.70622	0.161205	1.40926	1.48759	0.579302	0.413635	-1.27223	-0.477084	-0.516855	0.680714	0.453102	-0.140468	0.30201	0.435953	-0.324852	-1.4396	-0.993616	-1.15031
ACHE	-0.982189	-0.774868	-0.311062	-0.0832626	0.0826704	0.0520433	-0.445666	-0.498583	-0.53118	-0.951259	-0.747251	-0.128069	0.519494	0.71424	-0.109024	-0.68912	0.323976	0.497739	0.273219	0.335364	1.34174	1.04024	1.20676	1.08054
ACIN1	0.453237	0.176807	0.201094	0.106151	-1.18378	-0.0959241	-0.326226	-0.532951	0.540465	0.372225	0.182721	0.444531	-1.03306	0.605266	-0.260055	-0.136451	0.168163	-0.327288	-0.0148448	-0.0164907	-1.02434	-0.382509	-0.366024	-0.216936
ACKR1	-0.548817	-0.739129	-0.463257	-0.662222	0.230683	0.397847	0.158166	0.311451	-0.403519	-0.620622	-0.329907	-0.238299	0.351566	0.505524	0.123918	0.260345	-0.43767	-0.585162	-0.0874823	-0.657675	0.398563	0.449984	0.0827576	0.175348
ACKR2	-0.833596	0.61095	-0.155861	-0.0859673	-0.120892	-0.283263	0.796715	0.919292	-0.715433	-0.383602	0.0362789	-0.745347	-0.00528099	-0.441778	0.634232	1.89775	-0.703038	0.222946	-0.944629	-0.375929	-0.0649208	0.995822	-0.165189	-0.254735
ACKR3	0.870971	1.13744	0.967081	0.920086	-1.46548	0.600259	-0.714622	-0.595543	1.42917	0.770645	1.45497	1.32007	0.325704	0.506339	-0.627339	0.258426	-3.65378	-3.37686	-4.11811	-2.18712	-3.63574	-3.95477	-3.65999	-4.14305
ACKR4	1.38551	0.656533	1.03528	0.314781	-0.375719	0.542746	-0.42778	-0.566387	1.56416	1.3906	1.47016	1.5037	-0.795645	1.09765	-0.186979	0.850377	-1.32303	-2.75293	-0.833048	-2.0307	-1.07029	-1.19197	-0.992924	-0.46096
ACLY	0.0949959	0.177553	0.0505913	0.379342	-0.615983	-0.747374	-0.40837	0.430943	0.139549	0.180569	0.11433	0.373282	-0.716942	-1.00765	-0.663205	-0.128278	0.915238	0.681697	0.690128	0.699267	-0.106074	0.245961	0.0890752	0.533417
ACMSD	-0.271874	-0.266511	-0.233845	-0.255431	0.47959	0.356353	0.491741	0.334193	-0.141851	-0.118628	-0.0456518	-0.1938	0.648532	0.15572	0.560907	0.429941	0.0447278	-0.116395	0.0591064	-0.0844085	0.653582	0.202046	0.441463	0.331827
ACO1	0.117702	0.00505567	-0.54837	0.350076	-0.0653777	-0.553739	-1.86727	-1.31571	0.494934	-0.0968916	-0.738353	0.490129	0.0207224	-0.707797	-1.57357	-0.936126	1.09369	0.964848	1.06695	1.20584	0.853022	0.359493	-0.464475	-0.0952469
ACO2	0.0542992	0.11354	-0.00473091	0.230683	0.259477	-0.272862	-0.351583	-0.298978	0.0324917	0.0844499	-0.180743	0.0841267	0.0453393	-0.276458	-0.349275	-0.428745	1.0878	1.10674	0.855925	1.32595	1.35377	1.12787	1.29798	1.2072
ACOD1	-1.53081	1.01949	-0.256388	-1.31718	-0.59731	1.39004	-0.327234	0.535181	-1.24529	-0.432	2.1249	-1.23937	-0.31713	1.48759	0.331962	0.0835764	-0.908032	-0.433874	-2.17348	-1.02739	1.10108	1.4105	3.28301	0.980026
ACOT1	-0.718279	0.140652	-0.0274184	-0.504556	-0.772304	0.152809	0.0896915	0.215864	-1.05104	-0.00864476	-0.494761	-0.897955	-1.30065	-0.221573	-0.260172	-0.802904	0.846968	1.29798	1.0107	0.892548	0.0545238	1.2072	0.700864	0.914086
ACOT11	0.12341	-0.184278	0.305029	-0.167323	0.19343	0.533317	0.637132	-0.750784	0.0839875	-0.0072691	-0.6559	-0.28021	-0.424237	0.713935	0.948862	-0.106619	-0.0667983	0.2707	-2.06581	0.0390572	-0.201553	0.801668	1.18572	0.09764
ACOT12	-0.757448	-0.79483	-0.251077	0.109189	-0.350123	-0.268639	-0.051561	-0.340435	1.60638	2.09941	0.703663	0.974969	-0.0964094	0.245164	-0.062933	-0.418303	-0.560971	-0.821509	-0.917756	-1.00939	-0.117733	-0.377134	-0.0763073	-0.262317
ACOT13	0.249967	-0.209961	0.0135075	0.191034	0.560361	0.172012	-0.225533	-0.313647	-0.285617	-1.30146	-0.788182	-0.169153	-0.41239	-0.742394	-1.46913	-1.28712	1.44152	1.17476	0.986956	1.55063	1.39534	1.3994	1.27285	1.39763
ACOT4	-0.829713	0.117702	0.297548	0.0324632	0.27336	0.883682	-0.833414	0.567343	-2.68231	-1.91208	-1.70218	-2.39697	-1.85619	-0.966258	-4.70346	-1.99197	1.74753	2.05725	1.9941	2.33099	1.2521	1.63414	0.563307	0.716677
ACOT6	0.085326	-0.319756	0.11827	-0.943976	-0.34896	0.613677	-0.040876	1.37212	-0.672587	-0.642568	-0.508917	-0.899964	0.833479	0.468605	1.96856	0.534082	-0.570075	0.732939	0.216989	-1.06017	-0.0970055	0.396374	4.63449	-0.243477
ACOT7	-0.373846	-0.032618	-0.465221	0.640361	-0.944293	-1.24036	-0.215391	0.42682	-0.208433	-0.0825373	-0.225065	1.0863	-0.788392	-1.94643	-0.821381	-0.45733	2.54665	1.79	1.4308	2.50196	2.72011	2.75123	2.96686	3.25721
ACOT8	-0.121458	-0.0146499	-0.123203	-0.058055	-0.563231	-0.449662	0.241731	-0.00830383	-0.305006	-0.215369	-0.287937	-0.0705042	-0.799068	-0.5283	-0.412897	-0.32598	1.04875	0.863621	0.521079	0.858029	0.101749	0.788908	1.07148	0.57516
ACOT9	-0.0915778	0.124963	-0.0928513	0.186906	-0.391129	-0.474225	0.107465	0.239056	-0.120898	0.178299	0.096132	0.108501	-0.472903	-0.783581	0.486582	-0.150381	0.497602	0.616826	0.565458	0.951289	0.149647	0.319779	0.0456744	0.170467
ACOX1	0.391736	0.108064	0.213486	0.57896	0.498983	0.768863	-0.383303	-0.343944	0.340705	-0.0833652	-0.318643	0.300589	-0.189446	0.333254	-0.800661	-0.319536	0.3219	0.383193	0.225079	0.660805	-0.387331	-0.20981	-0.415494	-1.05142
ACOX2	-0.223496	-0.258767	-0.335667	-0.342859	0.216825	0.125614	0.311187	0.480878	-0.04864	0.0142465	-0.344394	-0.516114	0.198541	0.249895	0.42351	0.391974	-0.143118	-0.384594	-0.075478	-0.0945875	0.445722	0.283808	0.289196	0.477339
ACOX3	0.378255	-0.184726	-0.173167	0.410308	0.481799	0.441894	-0.458962	-0.586105	0.263246	-0.408274	-0.361683	0.265552	-0.334953	0.117573	-0.624324	-0.855363	0.787196	0.0462225	0.183026	0.716861	0.338084	0.69814	0.224276	-0.363184
ACOXL	-0.488076	-0.620268	-0.566185	-0.860442	-0.803989	-0.37162	0.628573	0.309829	-0.554947	-0.820098	-0.717287	-1.03529	-0.707797	-1.09396	-0.11199	-0.482285	4.03144	3.5282	2.4964	4.44935	3.89099	4.47283	5.72647	4.94208
ACOXL-AS1	-0.340165	-0.329677	-0.311912	-0.256314	0.371475	0.414474	0.448132	0.352605	-0.242962	-0.234889	-0.157694	-0.201101	0.535099	0.228323	0.549647	0.401408	-0.0738221	-0.231808	-0.191179	0.0978109	0.577304	0.223939	0.956171	0.379805
ACP1	0.236266	0.504294	0.341973	0.0819308	-0.325912	-1.18628	-0.437912	-0.413107	0.434164	0.587757	0.609316	0.318541	-0.809372	-0.490919	0.160005	-0.257823	0.386906	0.329455	0.451611	0.221929	-0.524325	-0.63423	-0.188346	0.0780283
ACP2	-0.384427	-0.186711	0.00364949	0.0269466	-0.806917	-1.25342	-1.19526	0.221617	-0.230652	-0.239606	0.245446	-0.0786888	-0.475606	-0.512104	-0.708178	0.65983	1.16123	1.86071	1.83339	1.98612	1.13521	1.65578	1.98788	2.44139
ACP4	-1.22454	-1.30025	-1.41994	-1.03832	-0.0219822	0.596809	-0.459347	0.892146	-0.571576	-0.378323	-0.425533	-1.59673	-0.602557	1.2619	1.65901	0.904603	-0.207949	0.989408	0.763932	-0.0164155	0.0159732	2.2446	-0.178833	1.53586
ACP5	0.61205	0.737392	0.848795	0.985865	0.730626	1.34454	1.08918	0.958642	-1.22883	-1.46913	-1.58127	-0.965109	-0.627777	-0.871037	0.199103	-0.597725	0.314615	0.620226	0.286784	0.270114	-0.586454	-0.0333339	-0.448373	-0.433468
ACP6	0.375442	-0.282156	0.235445	-0.00760803	-0.182364	0.844779	-1.28158	-0.369059	-0.0658075	-0.839806	-0.411171	-0.0312838	-0.457161	-1.94946	-1.55463	-0.265776	1.80112	1.28824	1.42941	1.59447	0.787196	0.541698	0.568786	0.319442
ACP7	-0.0293833	0.23774	-0.0174243	-0.147858	0.631169	-1.29228	-0.391947	-0.796002	-0.219149	0.00935318	-0.32167	-0.141121	0.718106	-0.942962	-0.241492	-0.224899	1.5438	1.42053	1.07094	1.26823	2.22539	0.482742	1.04398	1.57402
ACPP	0.180911	-0.339922	0.195775	0.0216387	-0.110567	1.02403	2.03581	1.69064	-0.298785	-0.743964	0.0434338	-0.111057	-0.0535513	-0.176004	1.60638	-0.365379	-0.394279	-0.158653	1.01908	-0.977748	0.306616	-0.408963	0.9227	0.602568
ACR	-0.368398	-0.865574	-0.332601	-1.18278	0.619507	0.916309	-0.208313	0.474376	-0.262578	0.907886	-0.590392	-0.155964	-0.221351	0.752348	-0.130873	0.141728	-0.262576	0.028153	-0.279967	0.237556	0.13271	0.783352	0.392715	0.417717
ACRBP	0.191559	-0.175415	-0.692184	0.327563	-0.196446	0.937216	1.06253	0.1157	0.723614	0.316915	0.121147	0.89676	-0.098374	0.756968	0.694244	-0.0765935	-0.780629	-1.11092	-1.11997	-1.03187	-1.2839	-0.633403	-0.883765	-1.80988
ACRV1	-0.0833414	0.0906259	-0.236261	-0.3086	0.415568	0.276161	0.396673	0.726417	-0.156844	-0.02279	-0.0400389	-0.266473	0.552607	0.0950708	0.505997	0.317511	0.015349	-0.130612	-0.0147867	-0.166976	0.538776	0.694069	0.370958	0.274675
ACSBG1	0.565806	0.120575	-0.072854	0.0467677	-0.371259	-0.221356	-0.082987	0.515061	0.0558079	0.117422	-0.0242056	-0.134558	-0.76668	-0.326016	-0.276788	0.5516	-1.10297	-1.01026	-1.13893	-1.05966	-0.330837	0.137499	-0.132035	0.619498
ACSBG2	0.0394336	-0.252716	-0.91086	0.171723	0.556691	0.702185	0.625431	1.32797	0.102397	0.0425744	-1.08315	-1.05025	-0.520473	-0.321828	-0.196254	0.490484	1.09911	0.0851545	0.922944	0.337979	-0.443298	0.611547	2.3014	1.26335
ACSF2	0.524457	0.841883	0.529554	0.785963	0.869419	0.784497	0.239426	1.07733	-1.24986	-1.36159	-1.28835	-1.2506	-1.06996	-1.21069	-1.24271	-1.79391	0.90136	0.96251	0.686244	0.729243	-0.64339	-0.492927	-0.985572	-0.778716
ACSF3	0.555686	0.0895396	0.520766	0.445331	-0.278071	0.29211	0.125544	-0.786415	0.0711568	-0.443113	0.0466108	0.070472	-0.512227	-0.371009	-0.513071	-1.47122	0.637431	0.250323	0.615905	0.891463	-0.318607	0.554429	0.550548	-0.582463
ACSL1	-0.162738	0.182401	-0.136231	0.508735	-0.41858	-1.31718	0.0544996	0.676564	-1.02265	-0.808255	-1.07553	-0.44794	-0.449579	-1.21177	-0.267578	-0.611283	0.630298	0.870686	0.905492	1.29568	1.44637	0.737309	0.708678	0.879568
ACSL3	0.271786	0.371629	0.570342	0.806984	0.144469	-0.397618	-0.974152	0.0844405	0.631216	0.445596	0.712638	1.12954	0.185202	-0.713559	-0.809032	0.534753	-1.101	-1.35419	-1.16881	0.0225561	-0.679307	-1.29198	-1.53112	-0.63072
ACSL4	0.0582582	0.097975	-0.181478	0.425367	0.012852	-1.45503	-0.692095	0.339202	-0.266084	-0.0497441	-0.823067	0.0227766	-0.21741	-0.913475	-0.858684	-0.215694	0.797736	0.865506	0.815524	1.13755	0.706432	-0.181325	-0.269517	1.21906
ACSL5	0.53224	0.365846	0.455408	0.682705	-0.366695	0.374149	-0.525375	0.132408	0.437458	0.335252	0.384079	0.796366	-0.429254	0.218175	-0.603509	0.0284028	-0.809181	-0.634131	-0.189008	-0.318323	-1.23714	-0.992281	-0.900057	-1.0235
ACSL6	-0.614309	-0.237898	0.140652	-0.592389	0.0437374	0.304005	0.692186	0.371038	-0.496449	-0.157993	0.519223	-0.127984	0.185563	-0.237889	0.493639	-0.0348466	0.0638916	-0.599071	0.452172	0.0512397	0.127907	-0.200074	0.618877	0.520524
ACSM1	0.0157336	0.293551	1.66452	0.16269	-1.44385	0.635817	-1.20565	0.0794492	1.14992	1.55286	2.09941	1.47016	1.51658	1.84029	-0.0682695	1.73294	-2.42721	-2.34062	0.200791	-2.1535	-1.2228	-1.71997	-1.20516	-1.25614
ACSM2A	0.182508	-0.482651	-0.471823	-0.440468	0.237924	0.181512	0.263227	0.144599	-0.177454	-0.397758	-0.314196	-0.376283	0.31527	-0.0497441	0.304479	0.174049	-0.269065	-0.439347	-0.420443	-0.302561	0.324372	-0.00338136	0.188133	0.133255
ACSM2B	-0.911715	-0.227497	-0.893764	-0.780352	-0.307481	-0.169065	0.0376392	-0.213062	-0.72994	0.0746881	-0.586239	-0.758401	0.0292818	0.451402	0.0633563	-0.285086	-0.718663	0.361226	0.133028	0.400083	0.012833	1.47768	-0.0785094	0.301321
ACSM3	-0.125692	0.363436	-0.0497943	0.347375	-0.993208	-1.09733	-0.764864	-0.854964	0.668561	0.534367	-0.343148	-0.0263206	0.808289	-0.52245	-0.372266	-0.328909	0.354015	1.12901	1.7199	1.1617	-0.174687	-0.216613	-0.259064	-0.277771
ACSM4	-0.620268	-0.117692	-0.610873	-0.589739	0.0445315	0.0713207	0.12737	0.00464594	-0.513259	-0.520089	-0.463046	0.371044	0.169754	-0.171282	0.164139	-0.0509439	-0.415024	-0.648952	-0.647093	-0.505355	0.13169	-0.141417	0.0300776	-0.0279371
ACSM5	-0.245359	-0.0155736	0.0700316	-0.0995836	-0.115989	0.618612	0.452722	-0.17422	-1.00215	-1.21007	0.108735	-0.83859	0.053133	0.0979821	0.24521	0.743646	-0.0225959	-0.112714	-1.05114	0.0821106	0.171182	0.429343	0.404977	0.230045
ACSM6	-0.188333	0.337299	0.0912392	0.673779	-0.280965	0.613046	0.0395572	-0.231777	0.844058	0.0423221	0.246784	0.604539	-0.0646268	0.512832	-0.123342	-0.532157	0.0925824	-0.195971	0.00920826	-0.0660569	-0.165729	0.194146	0.341141	-0.0627077
ACSS1	-0.33519	-0.205211	-0.645398	-0.322668	-1.14163	-1.05641	-0.227306	-0.587968	0.0989868	0.381773	0.204578	0.293555	-1.04604	-0.375747	-0.394708	-0.441829	1.30255	1.34876	0.765325	1.36446	0.113256	0.585408	0.90116	0.287258
ACSS2	0.554805	0.318131	0.511186	0.249341	-1.24166	-0.523095	-1.61898	-1.18004	1.12256	0.717323	0.904367	1.2698	-0.0967595	0.546589	-0.469452	0.208354	-0.267594	0.255003	0.650701	0.00268991	-1.10879	-0.889788	-1.09245	-0.722682
ACSS3	-0.403583	-0.146386	-0.343791	0.0303497	0.0519864	0.163047	0.230499	0.109678	-0.317461	-0.285851	-0.155767	-0.442763	0.216173	1.58163	0.217601	0.0452771	-0.131169	-0.309001	-0.275827	0.239859	0.175572	-0.0845353	0.568392	0.0459523
ACTA1	0.554154	0.299672	0.490829	0.242206	-0.955521	-0.362082	-0.937043	0.404845	-0.33132	0.0719489	-0.357548	-0.116196	-1.20643	-0.662916	-0.841335	0.363705	0.503982	0.105938	-0.275667	0.506889	0.124324	0.763932	0.531461	1.00037
ACTA2	-1.38175	-1.05205	-0.720444	0.363943	1.21405	-0.333192	1.33071	0.48639	-4.42533	-4.87731	-4.02095	-2.79822	-0.0613148	-2.28509	-0.40411	-2.1602	0.796122	0.728114	0.746074	1.43751	0.0669001	-0.560557	-0.19335	-0.319451
ACTB	0.140652	0.104058	0.127313	0.0871691	0.625193	-0.207873	0.464266	-0.690739	0.131502	0.0572409	0.14369	0.0532607	0.4134	-0.228297	0.00165317	-0.610976	0.46457	0.363542	0.339319	0.2497	0.790635	0.241203	0.645425	-0.147294
ACTBL2	0.0650944	0.0555018	-0.0819934	0.0708186	1.97563	-0.5823	0.543809	-0.540649	-0.315408	-0.0939923	0.10277	0.0893717	1.51561	-0.410052	-0.165802	-0.52483	0.93349	0.474197	0.414431	0.434303	2.21788	0.622117	0.774605	0.619584
ACTC1	-0.329308	-0.301046	-0.275378	-0.348557	0.192398	0.247807	0.355917	0.259646	-0.187753	-0.0212437	0.0722379	-0.344834	0.371585	0.040186	0.449668	0.183619	-0.0029483	-0.141902	-0.0700228	-0.299355	0.40756	-0.00718341	0.330357	0.229881
ACTG1	0.0600153	-0.0200263	-0.244298	0.380489	1.12306	-1.35052	0.273053	-0.650284	-0.663939	-1.09909	-1.0436	-0.107241	0.520878	-2.93867	-0.933195	-1.59056	2.15401	1.60312	1.76449	1.77952	2.2712	0.384796	0.762574	0.743167
ACTG1P17	0.560034	0.54148	0.30309	1.1062	-0.682884	-0.268146	-0.41168	-0.0732358	-0.0898949	0.513133	0.356154	0.867795	-0.56602	0.393983	-0.16359	0.723885	-0.321668	-0.0816241	-1.46793	-0.0660055	-0.853635	-0.546282	-0.980511	-0.371227
ACTG1P20	-0.110386	-0.226092	-0.328147	0.118179	0.59072	-0.0315032	0.584064	-0.482885	-0.746975	-1.06273	-1.1738	-0.251376	-0.183794	-1.3446	-0.517922	-1.30528	1.32877	1.02607	0.978162	1.10674	1.24492	0.728819	0.847836	0.676803
ACTG1P4	-0.892516	-0.931388	-1.51141	-0.292215	0.709762	1.47857	-0.366138	-0.367743	-1.40406	-0.937295	-1.75294	-0.498125	-0.18982	0.259125	-1.16308	-1.02793	0.689347	0.365571	0.329074	0.762316	1.68655	2.71552	0.556914	0.902085
ACTG2	-0.751731	-0.246057	1.10438	-0.838603	-0.276455	-0.234004	1.54586	0.650904	-0.741556	-0.726615	0.139824	-0.774991	0.473506	-0.145883	0.040259	-0.129789	-0.719527	0.629492	-0.234379	-0.493376	-0.0474061	0.391615	0.754238	0.618186
ACTL10	0.373533	-0.357926	-1.04549	0.559196	0.900117	1.04681	-0.948738	-0.189247	-0.117588	-2.01033	-1.51067	0.0234032	-0.386728	0.00702148	-3.26931	-1.70071	0.895613	0.752403	0.204971	1.30303	1.07148	0.937194	-0.41558	0.676954
ACTL6A	0.0101544	-0.186993	-0.0871947	0.37262	0.0499978	-0.254443	-0.898054	-0.637116	-0.190833	-0.546737	-0.575808	0.314511	-0.301748	-0.415083	-1.37072	-0.909244	0.738524	0.29177	0.35941	0.975585	0.934085	0.653582	0.784218	0.927895
ACTL6B	-0.115142	-0.132478	0.241829	-0.681848	0.187337	0.758557	0.578302	-0.348793	-1.23073	-0.565571	-1.052	-0.15181	0.625537	1.30647	0.439162	-0.403159	-0.862645	0.399043	0.19108	-0.347918	1.18311	1.36611	0.92175	0.601925
ACTL7A	-2.18881	-2.18881	-1.90248	-1.74641	-1.11756	0.716743	-0.834872	-0.231409	-1.80964	-0.595482	-0.602119	-1.8146	0.122414	0.259153	-0.7852	-0.265658	1.16078	0.982271	0.805349	1.08936	2.25831	1.845	2.15842	2.46
ACTL7B	0.280009	-0.214017	-1.05	-0.913761	-0.393321	0.847637	-0.0563577	-0.345848	0.0653248	0.893444	0.704678	-0.86	-0.106236	3.86405	-0.00881462	-0.412303	-0.984343	-1.3218	0.140924	-1.04774	-0.098195	0.0460148	-0.130851	-0.258157
ACTL8	0.51073	0.501757	0.170763	-0.235706	-0.843911	-0.265448	-0.536854	-0.722417	-0.739208	-0.0219687	0.20644	-0.32568	-0.35572	-0.342699	0.157047	-0.693727	0.78367	0.0421961	0.574465	0.421689	-0.574532	0.706663	1.12347	0.613668
ACTL9	-0.502225	-0.465754	-0.449379	-0.288969	0.195683	0.366332	1.25627	0.333332	-0.366523	-0.383028	-0.238896	-0.266736	0.811891	1.24959	1.91038	1.01125	-0.235861	-0.41383	-0.200272	-0.216613	0.496065	0.540897	1.22347	0.33043
ACTN1	-0.220855	-0.605467	-0.528037	-0.724514	-0.200625	-0.0602427	0.0723982	-0.144013	-0.481669	-0.455287	-0.315503	-0.383195	0.0436354	0.369359	0.0617175	-0.252637	-0.318098	3.62586	4.29536	0.0761503	0.000480906	-0.307235	1.87257	-0.135131
ACTN1-AS1	-0.432853	-0.470889	-0.416057	0.897078	0.0196972	0.128143	0.228807	0.0507185	-0.33051	-0.304855	-0.185249	-0.54132	0.19945	-0.154859	0.204578	-0.11408	-0.135529	-0.245428	-0.487346	-0.569422	0.20768	-0.155353	2.77358	2.19198
ACTN2	-0.848632	-0.863493	1.08718	-0.870108	-0.0727202	-0.30185	-0.0359718	-0.337548	0.836292	0.158165	-0.653608	-0.765883	0.820547	-0.476306	-0.0270148	-0.320811	0.549298	-0.970522	0.585408	-0.841348	-0.0552482	-0.38704	-0.146097	-0.252273
ACTN3	-0.96455	0.12844	0.0516007	1.1472	-0.46898	-0.0617268	2.60449	-0.492131	-0.845395	-0.803427	-0.659263	-0.985297	-0.206078	-0.551653	-0.164965	-0.554226	2.93854	4.34253	3.62586	4.08083	2.38656	2.48431	2.72295	-0.390774
ACTN4	0.169566	0.126474	0.0290131	0.103548	0.349668	-0.528829	0.159199	-0.502225	0.150509	0.0471848	0.199192	0.0123603	-0.189282	-0.198246	-0.316237	-0.771096	0.607072	0.493101	0.497338	0.727894	0.369739	0.545481	0.23183	0.531069
ACTR10	0.159154	0.148315	0.298935	0.329832	-0.120701	-0.258111	-0.285583	-0.595654	0.506167	0.536685	0.657887	0.700406	-0.222407	-0.0187286	-0.21741	-0.35157	-0.490706	-0.977248	0.075028	0.0528521	-0.53295	-0.98654	-1.3174	-1.00162
ACTR1A	0.149668	-0.0664679	-0.122998	0.292832	-0.0343401	-0.1974	-0.625854	-0.312135	0.104531	-0.411572	-0.385173	0.164955	-0.268771	-0.263909	-0.827686	-0.509587	0.771406	0.654121	0.554674	0.966712	0.21634	0.698485	0.435052	0.513988
ACTR1B	0.455367	0.370996	0.477448	0.399672	-0.439369	-0.435593	-0.358946	-0.281591	0.487812	0.378959	0.567087	0.626178	-0.453822	-0.414363	-0.502806	-0.123995	0.34261	0.164092	0.147259	0.438082	-0.5751	-0.573836	-0.409029	-0.669171
ACTR2	-0.0449551	-0.0182627	0.294861	-0.180143	-0.247213	-0.0176619	0.23411	-0.489871	0.306902	0.112619	0.333145	0.0963541	-0.433558	0.440653	0.0741141	0.117146	0.218406	0.578868	0.176675	-0.219287	-0.150794	-0.33709	-0.166685	-0.373509
ACTR3	0.083346	0.0189654	0.0374962	0.354007	0.336783	0.0431036	-0.463137	0.153252	0.0125023	-0.298412	-0.38634	0.194286	-0.268047	-0.627339	-0.923731	-0.558238	0.786178	0.557471	0.226207	0.789444	0.276604	0.275735	0.095428	0.496992
ACTR3B	0.452594	0.363022	0.302669	0.250484	-0.318451	-0.358926	-0.368462	-0.582068	0.681748	0.654434	0.68586	0.662645	-0.460981	-0.318733	-0.293246	-0.26477	-0.528946	-0.700562	-0.3654	-0.668439	-1.22244	-1.33379	-1.2573	-1.34161
ACTR3BP2	0.177066	-1.16236	0.0973975	-1.21558	1.58656	-0.583759	-0.273291	-0.587525	-0.0676795	-0.300291	0.713691	0.301703	-0.244068	1.41085	-0.182121	-0.638317	-1.02856	0.783238	-1.32208	-1.25091	1.19544	0.885966	-0.27854	1.04795
ACTR3BP5	-1.79402	-0.909112	-1.46387	-1.05986	-0.343944	-0.246372	-0.374318	-0.809686	-0.870779	-0.476163	-1.45018	-0.926933	0.0989868	0.697542	-0.282555	-0.543037	2.13272	2.52756	2.35655	3.11268	2.26493	3.58905	2.1132	2.08288
ACTR3C	0.506999	0.318706	0.688554	0.640266	-0.198789	-0.0527832	-0.60322	-1.17684	-0.901202	0.384877	0.161856	-0.034196	-1.16867	0.192862	0.233241	-0.875492	0.02126	0.502855	0.0243604	0.0627585	-0.651062	-0.124842	-0.521969	-0.635349
ACTR5	0.702393	0.651843	0.716347	0.469045	0.445331	-0.82554	-0.636404	0.322998	0.309306	0.334348	0.378179	0.208955	-0.417483	-0.828581	-0.595371	-0.5802	0.234101	0.220528	0.404128	0.117223	-0.196962	-0.43105	-0.504817	-0.301901
ACTR6	0.278376	0.0587434	0.177459	0.314841	0.127055	0.540204	-0.273494	-0.588495	0.399137	0.374423	0.318888	0.634156	-0.342983	-0.0989304	-0.0468647	-0.594666	0.189048	-0.00237946	0.0607726	0.229534	-0.483179	-0.404561	-0.208066	-0.768911
ACTR8	0.366261	-0.272999	-0.277333	0.423569	0.317819	-0.44951	-0.426565	-0.265588	0.363473	-0.350906	-0.7399	0.482978	0.178465	-0.281386	-0.805551	-0.385641	0.977502	0.253694	-0.378432	0.800634	0.426416	0.117694	-0.576085	0.166704
ACTRT1	0.537889	-0.237147	-0.454947	-0.676772	0.0501915	-0.0610934	0.0679422	-0.138505	-0.484692	-0.47411	-0.410028	-0.59515	0.126813	-0.280589	0.0632519	-0.147001	0.934085	-0.582545	-0.483901	-0.603667	0.0416543	-0.24463	-0.0643729	-0.140625
ACTRT2	1.06362	0.629775	0.218506	-0.482885	-0.189092	-0.381369	0.20879	-1.20916	0.0670381	0.366093	-0.429547	0.298669	0.353269	-0.780925	-0.675855	-0.478915	-0.0814903	1.21825	0.928778	0.991116	1.18903	-0.800423	-0.734782	-0.989967
ACTRT3	-1.00959	-1.02708	-0.967647	-1.05413	0.366807	-0.457614	-0.16723	1.72414	-0.858684	-0.840909	1.02911	0.277281	-0.105401	-0.581192	-0.125915	-0.482336	-0.448763	0.505895	-1.11392	0.408647	-0.135609	3.1392	-0.226187	-0.362079
ACVR1	0.0529808	0.403813	-0.16619	0.494971	0.00318545	-1.69306	-0.710047	-0.346693	-0.725005	-0.0118911	-0.92467	-0.0305582	-0.775984	-1.83558	-1.45737	-1.45872	1.14802	1.12714	0.622043	1.86573	1.15088	0.297088	0.353501	0.938016
ACVR1B	0.792508	1.41068	1.5272	0.541438	1.08269	-0.667665	-0.329677	-0.686564	1.29719	2.39691	1.76492	0.574226	-0.310787	-0.799343	-0.263776	-0.649866	-1.20823	-1.58663	-1.57297	-1.18273	-0.291699	-0.665606	-0.345711	-0.53903
ACVR1C	-0.161635	1.22907	1.29853	0.499279	-0.641668	-0.490942	-0.31509	-0.505935	-1.21454	-0.926933	-1.02793	-1.28835	-0.429547	-0.904671	-0.156062	-0.875013	0.19863	0.475331	0.457028	1.36842	0.462232	0.637872	0.62101	0.369841
ACVR2A	-1.18959	0.197776	-0.379205	-1.47269	-0.363564	-0.761995	2.30677	-0.81033	-0.12444	0.645305	1.54982	1.33567	-0.461826	0.234497	-0.365497	-0.170164	2.55012	2.12762	2.2638	1.73831	0.0390101	-0.768581	1.30987	-0.647773
ACVR2B	-0.314748	0.696074	0.466645	1.26824	0.276475	-0.606574	0.0799229	0.592774	-0.207017	0.175774	-1.09656	-0.111749	1.40226	1.32699	-1.39565	0.517872	-0.845468	0.329261	0.0607396	0.57684	-0.792184	-1.66428	0.629492	-1.20168
ACVR2B-AS1	-0.267276	-0.103764	-0.265448	-0.315238	0.426101	0.287538	0.378012	1.39413	-0.176592	-0.156062	-0.0929539	-0.258011	0.531691	0.0846514	0.417314	0.319061	0.0075728	-0.154593	0.135338	-0.148527	1.91889	1.80192	0.309281	0.233894
ACVRL1	-0.324718	-0.309144	-0.255693	-0.355722	0.237882	0.246759	0.353281	0.26001	-0.203185	-0.207369	0.012249	-0.31343	0.409089	0.108432	0.502157	0.229982	-0.0290666	-0.17998	-0.0163326	-0.257733	0.395905	0.0184634	0.35933	0.233671
ACY1	-0.0202931	-0.013928	-0.0951788	0.123214	0.18989	-0.116539	0.171624	-0.29854	-0.0605202	-0.0617728	-0.276926	0.0385936	0.127487	-0.0051665	-0.370246	-0.715688	0.349192	0.297269	0.318212	0.38654	-0.3002	-0.02124	-0.0752118	-0.262663
ACY3	-0.676938	-0.557425	-1.61459	-1.54236	0.146264	-1.85587	1.35885	-0.22341	-0.357162	0.274329	-1.40577	-0.122645	-0.333643	-1.8146	-0.81149	-0.489523	1.28453	2.2742	1.33132	2.03586	3.0153	3.27776	3.06787	2.31223
ACYP1	0.70912	0.317256	0.4306	0.413903	0.173291	0.392149	-0.638186	0.506103	0.231002	-0.0461992	0.105186	0.226015	-0.468588	-0.299075	-0.918265	-0.243982	0.155082	-0.0856356	-0.378903	-0.0306208	-0.288561	0.0527226	-0.256071	0.0904042
ACYP2	0.0826963	0.101501	0.0571656	0.105911	0.532602	-0.418426	-0.318249	-0.552992	0.227885	0.288541	0.0748271	0.334629	-0.162593	-0.279834	-0.121751	-0.252903	0.536522	0.351439	0.178478	0.190953	0.397571	0.0501543	-0.433349	-0.226347
ADA	-0.233891	0.0541152	0.263406	0.0894259	0.24162	0.870971	-0.415738	0.685894	-1.17988	-0.978907	-0.99578	-0.931072	-2.08957	-0.925695	-1.2097	-1.36961	3.12082	2.83612	3.11821	3.52241	3.29187	3.85376	3.44492	3.68436
ADA2	-0.307053	-0.233226	-0.124505	-0.0157047	-0.341353	0.219582	-0.286479	0.168824	-0.340884	-0.314583	-0.317999	0.0292818	-0.507531	0.120731	-0.624156	-0.712865	1.37107	2.02965	1.73609	1.94578	1.36611	1.12083	0.726488	1.02886
ADAD1	-0.772947	-0.76945	-0.712233	-0.555674	0.00335835	0.0526434	0.187482	0.671084	-0.678721	-0.644792	-0.514205	-0.499258	0.157682	-0.160284	0.270667	-0.0261579	-0.607452	0.910991	-0.771589	-0.291214	0.780823	-0.150794	0.141366	0.500204
ADAD2	0.17414	-0.172282	0.361221	0.442578	-0.34321	-0.0976185	-0.819409	-2.58303	0.688499	0.328396	0.823624	0.757942	-0.423903	0.439855	0.384725	0.132371	0.347761	0.210627	-0.898887	-0.079124	-0.795944	0.403306	-0.719091	-1.71474
ADAL	0.0440817	-0.352906	0.254047	0.361355	-0.147969	-0.763444	-0.540405	0.231745	-0.12261	-0.151411	0.171582	0.106665	-0.211167	-0.359107	-0.670474	0.143018	1.09178	0.34206	1.12737	0.585828	-0.135881	-0.30973	-0.486737	1.00301
ADAM10	-0.269107	-0.0146068	-0.113383	-0.368398	-0.468096	-0.787924	-0.457829	-0.710713	0.103728	0.441571	0.14852	0.0385702	-0.322229	-0.187363	0.109974	-0.284309	1.56215	1.64693	1.43991	1.73758	1.27991	0.932644	1.37046	1.14952
ADAM11	0.195921	-0.0149656	0.429934	0.188607	-1.13767	0.199367	-0.62972	-0.785793	0.562357	0.385389	0.61983	0.652706	-0.665031	0.563679	-0.465216	0.686605	-0.0773682	0.275035	0.365371	0.314615	-0.539322	-0.125982	-0.255565	1.0853
ADAM12	-0.559522	0.0695801	-0.0930125	-0.0748372	-0.343555	0.188784	0.12387	0.408633	0.148619	0.038039	-0.266685	-0.227831	-0.231394	-0.611732	0.00405766	0.0318163	0.0943024	0.0666825	0.174081	0.180539	-0.605916	0.306519	0.359634	0.301871
ADAM15	-0.0321088	0.0740237	0.0122018	0.201532	-0.437689	0.107797	0.947453	0.84709	-0.0681073	-0.0433159	-0.197876	-0.143065	-0.0173364	0.240063	0.921185	0.496592	0.575686	0.432301	0.390482	0.369469	-0.285292	0.402966	0.435534	-0.669308
ADAM17	0.119106	0.222342	0.300922	0.335421	-0.49485	-0.15253	-0.794176	-0.299431	-0.224941	0.0927664	-0.363298	0.130537	-0.57447	-0.0836423	-0.397135	0.0689218	0.255502	0.285168	0.333866	0.482541	-0.237614	0.23665	-0.359935	-0.0218634
ADAM18	-0.44677	-0.447195	-0.153334	-0.370961	0.205969	0.125012	0.242871	0.171345	-0.333554	-0.330187	0.16919	-0.415732	0.304673	-0.0908126	0.742616	0.104685	-0.193664	-0.364361	-0.231808	-0.368999	0.280631	-0.0780695	0.533108	0.125892
ADAM19	-0.132228	-0.0559504	-0.014698	-0.329629	-1.00174	-0.512001	-0.0385523	-0.56229	0.0690386	0.381979	0.36708	0.135913	-1.40753	0.34134	-0.0593416	-0.464589	0.747283	0.470678	0.270481	0.289495	-0.110236	0.427916	0.704078	0.474499
ADAM1A	0.383922	0.369155	0.404907	0.815604	-0.288701	-0.166234	-0.893688	0.467142	0.35292	0.288453	0.438386	0.612818	-0.383071	-0.0624263	-1.04851	0.503034	-1.49877	-1.65867	-1.0622	-0.910105	-1.32208	-1.4455	-2.1321	-1.32954
ADAM2	-0.35813	-0.353946	-0.330723	-0.257194	0.341581	0.4189	0.442232	0.358856	-0.260822	-0.253525	-0.180274	0.0337724	0.500108	0.229095	0.552102	1.20165	-0.0929569	-0.257863	-0.226645	-0.113095	0.554782	0.216738	0.439972	0.378679
ADAM20	1.08969	0.896739	0.544494	1.01903	-0.407831	-0.57486	-0.966733	-1.40112	1.23708	1.36385	0.596028	1.01919	-0.515368	0.819405	-0.173497	-0.0546651	0.187393	-0.148436	-1.43233	0.226187	-0.629212	0.559169	-1.04479	-1.36135
ADAM20P1	1.28227	1.15436	0.164551	0.573141	-0.296895	-0.203411	-0.747589	-0.269297	0.729176	1.04925	0.545995	0.59389	0.42172	0.430738	-0.640424	-0.206816	-0.367819	-1.90346	-2.48861	0.209981	-1.20936	-1.73296	-0.36746	-1.42821
ADAM21	-0.642762	-0.684546	-0.633802	0.975269	-0.0662505	-0.00511155	0.0761135	-0.0681555	-0.538011	-0.537337	-0.480592	0.934343	0.102397	-0.242376	0.10277	-0.169545	-0.443417	-0.689248	-0.671172	-0.654975	0.0469724	-0.222513	-0.0270391	-0.10748
ADAM21P1	-0.495226	0.290757	-0.610018	-0.513073	0.095316	0.0769315	0.213681	0.0812471	-0.571652	-0.536177	-0.430848	-0.442352	0.201666	-0.213833	0.267536	0.0696547	-0.459349	-0.67889	-0.553627	0.0588045	1.08854	-0.104992	0.144132	0.0188763
ADAM22	0.327486	0.389716	0.449609	0.147148	-0.638833	-1.2716	0.139642	0.274772	-1.02057	0.150864	-0.429098	-1.77667	-1.21572	-0.393009	-1.1046	-1.2559	0.377757	1.21724	-1.38417	1.30831	1.36357	0.489874	1.44851	1.12152
ADAM23	-0.623754	-1.09991	-0.61859	-1.32129	-0.400882	-0.705436	-0.45154	-0.78941	1.51138	3.4748	2.01579	1.71921	-0.0381405	-0.69828	1.80753	1.58723	-0.130404	0.0823998	2.52024	0.0268731	-0.406313	-0.153062	0.0591064	-0.48415
ADAM28	0.500053	0.807788	0.873706	1.03863	-0.760886	-1.30703	-0.539871	-0.271498	0.637312	1.10306	1.41369	1.12313	-0.103488	-0.143295	-0.168772	0.101916	-1.85901	-1.68416	-0.476381	-1.84292	-2.33534	-2.79851	-2.53986	-2.33919
ADAM29	-0.517613	0.154532	-0.370509	0.562392	-0.35974	1.28748	-0.0741587	-0.321943	-0.157449	-0.805696	-0.261024	-0.908071	-0.0778947	-0.37689	-0.0757492	0.793493	0.408837	0.0811365	-0.349969	0.021672	-0.101282	0.275844	-0.171123	-0.280401
ADAM30	0.549107	-0.305854	-0.822799	-0.789705	0.182022	-0.209649	0.0301747	-0.159789	0.280565	-0.72805	-0.619634	0.0454018	0.0119091	-0.410536	0.0751314	-0.243158	-0.723096	-1.01056	-0.955403	0.309054	-0.0218634	-0.336131	-0.0757211	-0.183743
ADAM32	-0.199256	-0.478247	-0.465533	-0.589842	0.106038	0.0337505	0.79215	0.013385	-0.41933	-0.0268939	0.128985	-0.0547182	0.20644	-0.211572	1.1599	-0.0187836	-0.302476	0.244564	0.0319857	0.532236	0.175348	1.52765	0.0562819	1.76123
ADAM33	-0.367743	-0.227437	0.024578	-0.0234157	-0.460841	0.38133	-0.273634	0.15378	-0.377784	-0.377932	-0.38126	0.0150283	-0.394357	-0.212514	-0.168729	-0.237935	-0.0317355	0.0613487	-0.277449	0.65348	0.292761	0.444915	-0.0991193	0.520279
ADAM3A	-0.655334	-0.667045	-0.598577	-0.735942	-0.217237	0.380981	0.0737832	-0.15994	-0.556788	-0.505125	-0.353603	-0.711871	1.59017	0.301578	0.0478617	-0.236708	0.59004	-0.416163	-0.710344	-0.838478	-0.00413425	0.144132	0.620361	0.817185
ADAM5	-0.41345	-0.182195	-0.373539	-0.393495	0.220087	0.40798	0.317994	0.201986	-0.300093	-0.299075	-0.186203	-0.356842	1.06677	0.0164638	0.381144	0.201907	-0.137918	0.0131424	-0.242979	-0.10652	0.9674	0.028956	0.875181	0.527184
ADAM6	-0.331508	-0.313945	-0.263381	-0.358193	0.223211	0.242541	0.347925	0.253657	-0.211119	-0.213044	0.0191517	-0.320946	0.398272	0.100784	0.486431	0.221761	-0.0355389	-0.186338	-0.0381202	-0.269065	0.386469	0.00801975	0.347696	0.227429
ADAM7	-0.456237	-0.487578	-0.398977	0.584843	-0.0319174	0.096019	0.165078	0.0198966	-0.366831	-0.339498	-0.224778	-0.523417	0.149158	-0.124766	0.156424	-0.0688474	-0.188282	-0.385182	-0.377563	-0.561067	0.0893807	-0.17998	0.0453086	-0.0425827
ADAM8	0.428502	0.807278	0.552588	0.401634	0.695284	0.7716	0.126233	0.882698	-0.244345	0.0934013	-0.536797	-0.259984	-0.357956	-0.120021	-0.259547	-0.33693	0.304158	0.643547	0.486428	0.186026	-0.368367	-0.94859	-1.74604	-0.948892
ADAM9	0.386197	-0.0594556	-0.588134	-0.498243	0.136292	0.0705061	0.220335	0.083192	-0.526558	-0.509084	-0.429732	-0.428934	0.229618	-0.222605	0.263994	0.0780026	-0.437345	-0.631495	-0.378831	-0.398152	0.199601	-0.0973821	0.482199	0.0276583
ADAMDEC1	2.1808	2.40121	2.47937	2.55656	-0.21392	-0.412205	-0.0557395	3.2287	0.112299	-0.798922	-0.0644775	0.107256	1.34863	-0.547717	0.608591	3.0572	-0.360075	-1.12257	-0.981312	0.161944	-0.116476	-0.470666	1.80859	-0.328831
ADAMTS1	-0.556698	-0.156685	-0.832337	-0.691618	-0.17715	-0.0777438	0.0899576	-0.0895743	-0.472524	-0.753412	0.360427	-0.638541	0.296559	-0.286228	0.176176	-0.199402	-0.749551	-1.01671	0.0917757	0.310946	0.0310807	-0.0781231	0.72035	-0.113495
ADAMTS10	-0.585476	-0.227033	-0.573551	0.00476487	-1.0489	-0.306589	2.55656	1.09041	1.59549	1.73294	2.19688	0.178203	-0.842076	0.287228	1.53936	0.354706	-0.126173	4.40335	4.04807	-0.843574	-0.684104	-1.11143	-0.184621	-0.939087
ADAMTS12	-0.922983	-0.920026	0.160471	1.07002	-0.212663	-0.265035	-0.0214334	0.0264469	0.361624	3.31014	-0.653933	-0.771931	-0.0239644	-0.46227	-0.0103471	-0.301556	0.127063	-1.04441	-1.07245	0.0252738	-0.0512067	-0.378432	1.56253	-0.00422932
ADAMTS13	-0.0602427	-0.181418	-0.242559	-0.4241	-0.624536	0.0319028	0.00291037	0.586985	-0.147717	0.0428626	-0.118308	0.381523	-0.530985	0.168007	0.268955	-0.427012	-0.400234	0.567331	-0.536722	-0.368367	0.0823998	-0.14725	-0.288561	0.506015
ADAMTS14	1.78986	-0.48426	-0.444551	-0.494372	0.0357442	0.0910141	0.215748	0.0915472	-0.376921	-0.380423	-0.211234	-0.485976	0.22677	-0.116413	0.26355	0.00744525	-0.231625	-0.41686	-0.325037	-0.514378	0.195355	-0.186745	0.140533	0.0536084
ADAMTS15	-0.107619	-0.508397	0.238477	-0.551612	0.228695	0.0520796	0.193272	0.0213319	-0.412968	-0.409373	-0.354999	-0.450233	0.278964	-0.209477	0.218324	0.0668185	-0.30166	-0.482718	-0.407914	-0.397677	0.258874	-0.0901582	0.0851545	0.0208487
ADAMTS16	-0.441824	-0.448159	-0.408653	-0.287748	0.266726	0.364319	0.394382	0.318435	-0.350033	-0.33663	-0.242706	-0.261347	0.418075	0.174207	0.472993	0.313823	-0.186109	0.103698	-0.379039	-0.16854	0.849334	0.144223	0.371221	0.323349
ADAMTS17	-0.662739	-0.65115	-0.623425	-0.680812	0.0861045	-0.068352	0.0798754	-0.0973103	-0.547802	-0.0761258	-0.422372	-0.627777	0.684642	0.771212	0.121717	-0.185101	-0.45573	0.418651	-0.638517	-0.679191	0.0473607	-0.0798009	-0.0197211	-0.106671
ADAMTS18	-0.716578	-0.755454	-0.691618	-0.733429	-0.206314	-0.104782	0.0713207	-0.113785	-0.600909	0.273436	0.553712	-0.723342	0.0686319	-0.3498	0.063383	-0.247968	-0.493233	-0.757626	-0.803346	0.997673	0.0217031	-0.302101	-0.0608711	-0.140784
ADAMTS19	0.503625	-0.23035	-0.054546	0.219736	-1.17513	0.903497	-0.682884	0.475755	0.224426	0.360427	-0.0166935	0.145976	-0.556013	0.980497	0.659565	0.905404	-0.632528	0.425001	-0.581911	0.439706	-0.772807	1.28193	-0.403738	1.2875
ADAMTS2	-0.799127	-0.797745	-0.702225	-0.8646	0.0880496	0.488215	-0.0151684	0.850503	-0.676598	-0.662916	-0.388101	-0.756959	0.0216539	0.0493299	0.00702148	0.224746	0.675685	0.782289	-0.411897	-0.84271	0.0240004	0.765588	0.635815	0.931926
ADAMTS20	-0.220452	-0.536337	-0.507355	-0.149027	0.12412	0.196708	0.27918	0.187686	-0.393069	-0.111305	-0.318167	-0.072754	0.350069	-0.0510213	0.361451	0.133343	-0.262464	-0.484741	0.25596	0.0738603	0.309331	-0.0292996	0.239273	0.139201
ADAMTS3	-0.0177652	-0.932308	-0.89607	-0.728507	-0.198126	-0.108683	0.0797352	-0.131601	-0.761939	-0.71224	-0.617848	-0.750736	0.0806186	0.381915	0.0845671	-0.254169	-0.685021	-0.995361	0.732119	-0.879305	0.0845598	0.54117	-0.0178015	-0.118286
ADAMTS4	-0.376805	-0.378752	-0.344307	-0.3834	0.239088	0.236449	0.317454	0.2197	-0.263776	-0.267533	-0.16093	-0.344609	0.365279	0.0212321	0.394659	0.474362	-0.107621	-0.263729	0.809502	0.0565854	0.39696	0.0257645	0.271692	0.199422
ADAMTS5	-0.297906	-0.232172	-0.218095	-0.34408	0.32528	0.263681	0.380453	0.275073	-0.164531	-0.168303	0.000268198	-0.286104	0.46679	0.118047	0.547225	0.26973	0.00678077	-0.140417	0.0315694	-0.20981	0.452772	0.0585478	0.391375	0.257041
ADAMTS6	0.426646	0.709951	1.52966	0.662246	-0.315527	0.559658	0.519697	0.521261	-0.888169	-0.151455	-0.0353113	-0.950818	-0.0284696	-0.00841104	0.765092	-0.435224	-1.0473	-0.0205069	0.92329	-1.60715	-1.36873	-1.509	-1.12791	-1.58013
ADAMTS7	0.165599	-0.335667	-0.268677	-0.136769	0.527847	0.19343	0.301334	0.508139	-0.0304959	-0.581638	-0.475441	-0.298099	0.513705	0.321907	0.269685	-0.33414	0.0795408	0.0832637	0.0300501	-0.149023	0.707496	0.678085	1.13542	-0.191283
ADAMTS7P1	-0.176224	-0.100786	0.0124367	-0.0362784	0.430855	0.276272	-0.0244199	0.232074	-0.84256	-0.104783	-0.270902	-0.326016	0.0149895	0.194875	-0.0788328	0.0544498	-0.0466025	0.0667395	0.168724	-0.0342784	-0.161792	0.372738	-0.206083	-0.263889
ADAMTS8	-0.520118	-0.52397	1.75921	-0.529733	0.104235	0.0616647	0.207799	0.0854681	-0.400378	-0.410291	-0.308758	-0.465899	0.239774	-0.146592	0.294386	0.0225954	-0.289657	-0.477284	-0.256761	-0.457034	0.191777	-0.163556	0.157821	0.0353139
ADAMTS9	-0.254947	-0.265188	-0.206314	-0.29952	0.434647	0.318666	0.386071	0.258557	-0.125915	-0.109183	-0.0324421	-0.245758	0.562159	0.145211	0.4188	0.331779	0.0715194	-0.102308	0.0189618	-0.134038	0.523856	0.145577	0.314122	0.250084
ADAMTS9-AS1	-0.319871	-0.333506	-0.304659	-0.273079	0.339921	0.403731	0.411214	0.338396	-0.212867	-0.213319	-0.153184	-0.230752	0.496472	0.225684	0.504279	0.342311	-0.0349311	-0.217206	-0.170017	-0.133995	0.536576	0.188194	0.400564	0.340372
ADAMTS9-AS2	-0.545823	0.103179	0.823225	-0.0464349	0.216396	0.178456	0.213977	0.0569596	-0.430363	-0.424606	-0.378977	-0.437248	0.281014	-0.220968	0.246577	0.0651142	-0.32867	-0.521142	-0.2929	-0.383925	1.92936	-0.0987199	0.123277	0.0233781
ADAMTSL1	-0.533451	-0.213562	-0.0855938	-0.790775	0.0956005	0.65541	-0.122744	-0.0509404	-0.843303	-0.715556	-0.445648	-0.811117	0.342867	0.351473	0.145068	0.233241	-0.00318346	-0.0513578	-0.143345	-0.127713	0.764844	0.400451	0.713236	1.15587
ADAMTSL2	-0.248328	-0.572331	-0.888471	-0.974858	-0.29489	0.298123	1.00182	-0.440789	0.181822	-0.71952	-0.691309	-0.294903	-0.179126	0.669952	-0.13736	1.04272	0.180632	0.372565	-0.895651	0.0304695	-0.0243857	0.460782	0.214806	0.52364
ADAMTSL3	-0.510591	-0.555561	-0.0879929	-0.517887	0.115235	0.0956962	0.219311	0.0699876	-0.434989	-0.45859	-0.339852	-0.475441	0.482305	-0.198667	0.251746	0.0514553	-0.32546	0.135763	-0.394358	-0.463006	0.256378	-0.117449	0.127478	0.0600181
ADAMTSL4	-0.28065	-0.136345	-0.243103	-0.200754	0.0049354	-0.363674	-0.0855488	0.288183	-0.649866	-0.43231	-0.547384	-1.10434	-0.45884	0.470353	-0.125692	0.340892	-0.546282	0.0361219	0.132919	-0.0290666	-0.076215	0.0540507	0.982699	0.908031
ADAMTSL4-AS1	0.266382	0.880743	0.214338	-0.157699	1.58749	0.462704	0.690418	-0.330625	-1.48883	0.0837335	-1.71884	-2.7162	-0.102169	-0.328909	0.510775	-1.89184	-0.338545	0.102773	-0.383505	0.269929	1.94513	1.55299	0.333339	0.581027
ADAMTSL5	-0.158953	-0.170868	-0.167323	-0.164018	0.203291	0.092875	0.045508	-0.657543	-0.132996	-0.0608761	0.0221659	-0.111097	-0.00560597	0.440463	-0.0588608	-0.597537	0.255677	0.318622	-0.149823	0.728289	0.890382	0.766123	0.21373	-0.04167
ADAP1	0.198937	0.628721	-0.291777	0.733698	0.549107	1.32522	2.40836	2.55656	-0.75445	-0.776705	-1.23585	-0.448118	0.999577	1.28938	1.86702	1.57166	0.123198	0.0602078	-1.15278	-0.75435	-0.256559	-0.283501	-0.555487	-0.00684062
ADAP2	0.814381	0.404756	0.796308	0.424284	-0.514227	0.00607115	-1.5866	-0.751731	0.492654	0.620672	0.530304	0.268696	0.596028	0.609316	-0.347603	0.258238	-2.86197	-1.92259	-0.98829	-1.83229	-2.00967	-3.02817	-3.07954	-3.83424
ADAR	-0.208541	-0.0717318	-0.172092	-0.00105762	0.111685	0.106921	-0.0169466	0.630987	-0.365846	-0.259794	-0.412458	-0.0664188	-0.107432	0.133383	-0.20514	0.816863	-0.100541	-5.72325e-05	-0.306973	0.185514	0.0112489	0.337613	0.25862	0.735688
ADARB1	-0.111174	0.134337	0.285905	0.238669	-0.368533	-1.00822	0.551424	0.00182606	2.3204	2.64575	2.83939	2.43882	1.19866	1.36103	1.27468	1.70938	-0.857365	-0.812015	0.778129	-1.18541	-1.57545	-2.03874	-1.42331	-1.68899
ADARB2	-0.293171	0.357378	-0.268448	-1.002	0.0200056	0.178645	0.0901757	0.777047	0.500478	0.150144	-0.298705	-0.639373	-0.104154	0.491062	0.992154	-0.0450981	-0.981312	0.330815	-1.10735	-0.340598	-0.0463447	0.431456	0.780309	0.882559
ADARB2-AS1	-1.10473	-1.12042	-0.491293	-1.09402	0.724683	-0.487773	-0.204815	-0.487434	-0.93037	-0.925086	-0.774897	-0.664197	-0.189246	-0.58901	-0.118481	-0.555005	1.03081	1.92433	1.64451	2.98099	-0.194478	2.74632	1.03135	1.24731
ADAT1	0.423258	0.591501	0.518727	0.647156	-0.280381	-0.228197	-0.155674	0.827011	0.057313	0.481125	0.669133	0.26231	-0.575957	-0.428216	-0.338815	1.03728	0.0556948	-0.0818222	-0.0686492	-0.0933131	-0.429269	-0.858416	-0.721014	-0.279564
ADAT2	0.191076	0.297681	0.158323	0.381741	0.411296	0.180648	-0.00140926	-0.304136	0.449808	0.381523	-0.173478	0.333145	0.654597	0.313731	-0.257749	-0.541989	-0.52124	-0.775557	-0.894025	-0.197298	-0.358779	-0.850286	-0.597408	-1.62226
ADAT3	0.351457	0.104119	0.149466	0.582299	1.05404	0.800534	-0.0339062	0.0366033	-0.00977637	-0.84431	-0.724221	-0.0825373	-0.308602	-0.358078	-0.684482	-0.834819	0.886778	0.298762	0.25862	0.74033	1.58929	0.613104	-0.466281	0.0666495
ADCK1	0.0320909	0.0997534	0.494034	0.175228	-0.892664	-1.22879	-0.688673	-0.0140891	0.0217081	0.509964	1.00206	0.35828	-0.388042	-0.964449	-0.575198	0.556196	0.416588	0.549193	1.11915	0.607689	-0.420059	-0.0872993	-0.42536	0.11885
ADCK2	0.555252	0.768863	0.630987	0.910858	0.600127	-0.678973	-0.587132	0.456491	0.418246	0.0490121	0.272206	0.31305	-0.151411	-1.65359	-0.627615	-0.191569	0.228378	0.406712	0.285831	0.214426	-0.48921	-0.942557	-0.971412	-1.07459
ADCK5	-0.108133	-0.0613406	-0.101844	-0.153173	-0.603094	-0.451645	-0.401202	-0.242365	0.250557	0.374527	0.270424	0.358182	-0.410374	0.188146	-0.258959	0.196119	0.270376	0.220075	0.110791	0.361307	-0.356145	0.0790723	-0.265088	0.005683
ADCY1	0.741802	2.18468	1.37922	0.251376	2.81859	-0.0398632	1.78986	0.461817	-0.513799	-1.27059	-1.13083	-1.33242	-0.458647	-0.980859	-0.376442	-0.939578	2.07443	0.410268	0.275544	0.417065	-0.402842	-0.805727	2.50614	-0.666359
ADCY10	-0.531094	-0.538558	-0.486314	-0.518972	0.0612957	0.0772467	0.210061	0.0945477	-0.410995	-0.426634	-0.3012	0.176582	0.228826	-0.132626	0.295029	0.0149467	-0.297145	1.21881	-0.277953	-0.479199	0.183247	-0.173663	0.160383	0.0456744
ADCY10P1	1.11929	0.905021	1.06643	0.549107	-1.07333	0.587421	-1.30993	-0.171728	2.30317	2.27686	2.01059	1.97456	-0.362651	1.56231	-0.573078	1.23832	-0.360706	-0.29218	-0.310219	-0.319191	-2.45169	-1.14069	-1.68279	-1.5472
ADCY2	-0.295375	-0.145342	-0.277952	-0.320704	0.43657	0.301519	1.13744	0.248926	-0.169622	-0.169106	-0.123995	-0.259318	0.564824	1.58469	0.437666	0.311977	0.000410143	-0.162918	-0.0792435	-0.145315	0.542443	0.135992	0.321336	0.439271
ADCY3	0.233406	0.693326	0.368154	-0.0308456	-0.0683029	0.112851	-0.558994	-0.372468	-0.18043	0.134653	-0.368634	0.0182825	-0.194658	-0.252039	-0.268561	-1.10321	0.20753	0.026554	0.311256	0.286431	-0.0234339	0.261651	0.200319	0.211046
ADCY4	0.463146	0.343318	0.427914	0.311187	0.00380761	0.281696	0.672371	0.501328	-0.620622	-0.278214	-0.240228	-0.654815	-0.6733	-0.377476	0.367347	-0.347116	0.545978	0.93349	1.29612	0.828722	-0.149431	0.509089	-0.011213	0.293441
ADCY5	-0.71938	-0.731424	1.41767	-0.778108	0.0751776	-0.219296	0.0325429	0.502138	-0.599895	-0.593108	-0.562537	-0.676746	0.112397	-0.398847	0.0512596	1.03943	0.394278	-0.777431	-0.63072	-0.71321	0.0302235	-0.31693	-0.0915136	-0.175222
ADCY6	-1.09013	-1.08924	-1.05398	-1.09333	-0.192457	0.572294	-0.130042	-0.512488	-0.912775	-0.849132	-0.699948	-1.0457	-0.158244	-0.646359	-0.157841	-0.638685	2.43658	1.8422	1.8922	2.01004	2.5146	0.407905	-0.226051	-0.339271
ADCY7	0.405508	0.203332	0.309562	0.645564	0.93299	0.603633	-0.619406	0.438525	0.238397	0.0950086	0.209994	0.401675	0.916232	0.537307	-0.626339	0.636837	-1.253	-0.93985	-1.06611	-0.592858	-0.638345	-1.18812	-1.97425	-0.973439
ADCY8	-0.282022	-0.276377	-0.221551	-0.291435	0.390781	0.335799	0.420535	0.294971	-0.171876	-0.13479	-0.00493362	-0.233304	0.50957	0.122414	0.472794	0.370479	0.0466095	-0.130109	-0.0177317	-0.140625	0.518257	0.149647	0.367815	0.272715
ADCY9	0.148385	1.0247	0.605214	0.301473	-0.56177	-1.0375	0.0750951	-1.45503	1.25808	1.54234	1.16788	1.24749	1.05255	0.505356	1.00303	1.13551	-3.49337	-0.235773	-0.120898	-2.86728	-0.96678	-2.23236	-1.74748	-2.09105
ADCYAP1	-0.248381	-0.288588	-0.21444	-0.362901	0.285011	0.310904	0.370412	0.243164	-0.124931	-0.109822	0.050943	-0.323125	0.408601	0.0658185	0.431918	0.233144	0.106091	-0.109915	-0.18988	-0.260771	0.478726	0.0673446	0.320728	0.244383
ADCYAP1R1	0.355415	-0.564288	0.00073409	0.301691	-0.536587	-0.482193	0.28186	-0.518383	0.490421	0.053499	0.243225	-0.805123	-0.234855	0.472323	1.29463	-0.548444	-1.11711	0.510535	-1.82207	0.242078	-0.198443	0.583721	0.101551	-0.398968
ADD1	0.204055	0.47959	0.214644	0.35153	-0.472453	-0.955174	-0.180143	-0.600032	0.622932	0.705921	0.609567	0.372399	-0.392726	-0.887786	-0.575072	-0.669127	0.844532	0.819007	0.391695	0.351616	-0.736422	-0.648248	-0.754223	-1.10687
ADD2	1.09692	0.801009	0.698773	0.623385	0.00481585	-0.285986	-0.790775	-0.879405	0.966158	1.39323	1.14992	0.476049	0.331078	1.02306	0.994391	1.20074	-3.09846	-3.73752	-4.15353	-3.28539	-2.63414	-2.47555	-2.44106	-2.88629
ADD3	0.363074	0.250619	0.422778	0.533403	0.430714	-0.350765	-0.594355	0.0170106	0.438386	0.22236	0.397846	0.498798	-0.00203697	-0.890837	-0.672841	-0.202646	-0.124341	0.0692904	0.205596	0.137676	-0.648396	-1.25583	-1.46487	-1.33234
ADD3-AS1	0.411779	0.236266	0.316262	0.2935	0.417965	0.279262	-0.168035	-0.614484	0.928419	0.340991	0.387296	0.175678	-0.733439	-0.1019	0.111477	0.626084	0.101624	-0.154478	0.135607	-0.0109182	-0.393412	-0.199906	-0.298931	-0.582206
ADGB	0.110574	-0.0639435	-0.26717	-0.107085	-0.04507	-0.366842	-0.105684	0.159638	0.214461	-0.0317139	1.01101	-0.904671	0.838461	0.427174	0.214461	-0.444509	-0.793021	-0.945112	0.319307	0.0118421	0.011298	-0.457383	-0.196269	0.356254
ADGRA1	-0.663436	-0.639203	0.00318545	-0.332918	0.261033	0.184457	0.27653	0.172591	-0.566483	-0.542282	-0.396251	-0.39105	0.260781	0.310831	0.392733	0.131289	-0.458391	-0.668625	-0.555034	-0.376459	0.676803	0.877958	0.262119	0.120932
ADGRA2	-0.861789	-0.0641002	-0.851434	-0.896589	-0.147691	0.202636	-0.0704408	-0.356485	-0.743738	-0.734828	-0.681658	-0.795645	-0.0178838	-0.448186	-0.0584735	1.39964	-0.730421	2.00002	1.96606	-0.877282	-0.0742561	0.848567	-0.168907	1.04725
ADGRA3	-0.928267	-0.937281	-0.874817	-0.430621	-0.264979	0.314547	0.643191	-0.36157	-0.100806	0.880935	-0.606615	0.092064	-0.0511525	-0.497392	0.994635	0.739699	0.996303	1.21264	1.28193	0.71929	0.747047	-0.45091	1.54263	-0.275945
ADGRB1	0.4464	0.747642	1.11011	0.877873	-0.000733182	0.489519	-0.282442	0.38138	0.040186	0.214911	0.206733	0.308926	-0.246721	-0.647419	-0.296298	-0.90945	-2.11645	-2.20307	-2.13595	-1.95034	-2.72379	-1.57788	-2.01325	-2.22056
ADGRB2	2.46639	2.71211	1.79477	2.76867	2.46639	1.72414	0.663043	1.3633	-1.0349	-0.968317	-0.933195	-0.858572	-0.315876	-0.271935	-0.477539	-1.07752	-0.533896	0.710876	0.645844	-0.647773	0.496992	-0.405129	-0.68766	-0.812896
ADGRB3	-0.385655	-0.40425	-0.34876	-0.21429	0.350363	0.432409	0.510819	0.389976	-0.303294	-0.28468	-0.167624	-0.204898	0.532199	0.235307	0.575144	0.420829	-0.125081	-0.282334	-0.280179	-0.0331463	0.586991	0.22335	0.460678	0.414513
ADGRD1	-0.380193	-0.400612	-0.10409	-0.613732	-0.230556	0.334888	0.000105514	-0.421955	0.882281	0.645676	2.04031	0.585812	-0.511161	0.935251	-0.15029	0.988455	-0.574919	0.185346	0.130337	-0.708413	-0.400234	-0.274256	-0.477675	0.435372
ADGRD2	0.0646617	0.670515	0.486455	0.201264	-0.810196	0.664793	-0.516279	0.101206	0.245446	0.142463	-0.198667	-0.179022	-0.358163	0.217081	-0.248939	0.271351	-0.555034	0.406179	-0.271719	0.243453	-1.19139	0.504796	0.293948	0.505607
ADGRE1	-0.14722	-0.692184	-0.619016	-0.455062	-0.270321	0.203928	-0.181756	0.432561	-0.500046	-0.0253616	-0.37079	-0.00688502	-0.225714	0.663715	-0.171876	-0.0515434	0.31632	0.111661	0.688083	0.217733	-0.126936	0.598833	-0.41412	0.240491
ADGRE2	-0.741013	-0.796296	0.268678	0.129973	0.370325	-0.199084	-0.0260636	0.374149	-0.639089	-0.628852	-0.552962	-0.0999516	-0.0171388	-0.355474	-0.0174619	-0.316656	-0.197417	2.83124	3.4525	-0.871285	-0.0772854	-0.362826	-0.134109	-0.225602
ADGRE3	-0.255081	-0.748856	0.132025	-0.627565	0.82144	-0.00258048	0.139194	-0.0144547	-0.593494	-0.597634	-0.477392	-0.612074	0.168606	0.333338	0.196617	-0.129553	-0.541352	0.387742	-0.573625	-0.685432	0.112205	-0.258609	0.0534086	-0.028523
ADGRE4P	-0.396096	-0.389526	-0.349959	-0.412013	0.190319	0.190444	0.280009	0.16617	-0.285552	-0.273011	0.116165	-0.386954	0.948862	-0.0339859	0.313648	0.14137	-0.114346	0.478595	-0.190183	-0.127048	0.31536	-0.0411752	0.208653	0.123198
ADGRE5	-0.201183	0.537776	-0.0780068	0.472447	0.425791	-0.554765	0.37996	0.808268	-1.38658	-0.850004	-1.48705	-0.936491	-0.208852	-0.840212	-0.0951866	-0.18078	-0.128756	0.35834	-0.715653	0.273461	-0.262034	-0.338276	-0.281834	0.263804
ADGRF1	-0.413792	-0.465308	-0.413028	-0.444179	0.214338	0.163989	0.260161	0.135488	-0.101779	-0.3333	-0.260055	-0.117315	0.339222	-0.0913381	0.287873	0.159004	0.17405	-0.383925	-0.275884	-0.119207	0.288488	-0.0318096	0.183554	0.0837868
ADGRF2	-0.272275	-0.290825	-0.188199	-0.37222	0.233406	0.274792	0.322281	0.213002	-0.167723	-0.139197	0.036116	-0.324802	0.355307	0.0823724	0.360067	0.221843	0.0736742	-0.125536	-0.103203	-0.262938	0.359854	0.0447278	0.259392	0.177553
ADGRF3	-1.57173	-2.09092	-1.79402	-0.800303	-1.05986	1.46497	0.0384802	-0.146581	-1.76283	-0.239207	-1.11605	-0.0753648	-0.373175	0.301236	-0.674217	0.831559	1.11846	1.16877	-1.20758	0.686919	0.982271	1.47695	1.21724	2.27612
ADGRF4	-0.775786	-0.788173	-0.736801	-0.683289	-0.0438116	-0.0939459	0.0976039	-0.0827245	-0.69684	-0.656946	-0.554947	-0.588592	0.0830545	-0.335686	2.07165	-0.124931	0.547236	0.663917	-0.743773	-0.662711	0.0388722	-0.263082	0.00518994	0.0376
ADGRF5	-0.423158	-0.420809	-0.38732	-0.351152	0.272936	1.00182	0.350363	0.245997	-0.316032	0.155938	-0.230369	-0.300976	0.835899	0.063383	0.62222	0.666044	-0.166685	-0.336514	-0.201873	-0.192068	0.426123	0.0702855	0.326375	0.246946
ADGRG1	-0.856106	-0.879984	-0.844886	-0.891125	-0.142622	-0.284167	-0.0657813	-0.352073	-0.73634	-0.727823	-0.675637	-0.790162	-0.0140689	-0.443317	-0.0554709	-0.348864	2.32308	9.87478	7.58418	0.982497	3.49436	-0.38791	1.40138	1.99664
ADGRG2	-0.218668	-0.388605	-0.352625	-0.381034	0.353196	0.21772	0.317214	0.198704	-0.268185	-0.263214	-0.223259	-0.317892	0.431724	0.0175198	0.388895	0.222041	-0.120191	-0.0368088	0.153635	-0.225667	0.412593	0.0462797	0.266191	0.183026
ADGRG3	-0.523095	-0.173451	-0.408052	-0.0176619	0.30716	0.0609344	-0.230379	0.0625274	-0.638928	-0.652445	-0.252039	-0.487169	-0.151024	0.561663	-0.139539	0.54368	-0.419068	0.715874	-0.129557	0.555492	-0.128552	1.11186	0.393426	0.509353
ADGRG4	-0.485892	-0.506614	-0.454707	-0.544099	0.150025	0.798541	0.163298	0.342463	0.346776	-0.370635	-0.309245	-0.472903	0.537474	-0.191639	1.79793	0.0292818	-0.245838	-0.433779	-0.326354	-0.440648	0.161424	-0.123729	0.926907	-0.0505855
ADGRG5	0.217152	0.54349	0.355116	0.936576	-0.880949	-0.279024	-0.40002	0.588713	0.220114	0.547682	0.112504	0.650808	-0.625604	-1.22817	-0.640616	0.498278	-0.191009	0.384609	0.00511231	0.454953	-0.357526	-0.156844	-0.439835	0.0496536
ADGRG6	-0.269803	-0.267953	-0.224077	-0.291253	0.445128	0.317537	0.45724	0.323423	-0.129011	-0.125872	-0.0440602	-0.22881	0.949233	0.154541	0.607475	0.352589	0.0416866	-0.117756	0.0718522	-0.124265	1.31506	0.141311	0.769327	0.321594
ADGRG7	-0.25072	-0.246842	-0.217344	-0.282501	0.513879	0.334193	0.445331	0.7836	-0.109789	-0.0976173	-0.047434	-0.216893	0.670965	0.157861	0.503533	0.382014	0.0774433	-0.0937232	0.0249175	-0.097154	0.687587	0.186161	0.387795	0.317721
ADGRL1	-0.178985	-0.635785	-0.315659	-1.22879	-0.208571	-0.298806	-0.26045	1.16653	-0.28173	-0.278662	0.154648	-0.0010775	-0.228206	0.412921	-0.22642	0.502458	0.361942	0.63041	-1.28637	-0.127859	-1.25339	0.651534	-0.609155	0.0247509
ADGRL2	-0.233261	-1.08125	-0.177252	-0.811206	0.338718	0.661502	0.325387	0.169038	-0.339661	-0.538097	-0.132417	-0.376003	-0.167591	0.459558	0.647202	0.208805	-0.205631	-0.225091	-0.229482	0.0510826	0.474784	0.569658	0.669437	0.481562
ADGRL3	-0.653304	0.475755	0.238986	0.209585	0.204854	-0.0459839	0.0613584	0.0669728	-0.443628	0.0925826	-0.298226	-0.452344	0.11813	-0.259984	0.0895982	-0.193635	-0.34972	-0.386232	-0.168436	-0.526434	0.0486248	-0.151902	-0.0252175	-0.0227131
ADGRL4	-0.189615	-0.424997	-0.388111	-0.321624	0.274792	0.310793	0.373262	0.460394	-0.321195	-0.305779	-0.237695	-0.175956	0.410387	0.466039	0.478006	0.284678	-0.16165	-0.340019	-0.229402	-0.117106	0.441529	0.260642	0.363896	0.266919
ADGRV1	-0.544099	1.69736	-0.527142	-0.38732	0.218205	0.0514827	0.213587	0.0562508	-0.428615	-0.423084	-0.377993	-0.437874	0.281791	-0.220771	0.246403	0.0641538	-0.167038	-0.518236	-0.291699	-0.384346	0.243814	-0.0990764	0.122821	0.0235463
ADH1A	-0.927957	-0.97588	-0.762854	-0.970068	-0.306939	-0.334097	0.888733	0.598736	-0.800661	0.0476993	-0.194028	-0.873193	-0.10263	0.299703	-0.10485	-0.433951	0.686244	-1.10735	0.551741	0.489127	-0.127776	-0.043393	-0.201672	-0.318492
ADH1B	-0.365215	-0.388005	-0.319277	-0.431356	0.204333	0.193171	0.252849	0.138728	0.0985846	-0.25474	-0.170632	-0.382676	0.300462	0.198032	2.42115	0.153382	-0.101867	-0.27032	-0.163556	-0.326033	0.273146	-0.0249491	0.159006	0.794756
ADH1C	-0.912523	-0.702318	-0.876196	-0.984352	-0.161013	-0.382406	-0.0963689	0.263406	-0.773617	-0.758591	-0.69388	-0.599657	-0.0359116	-0.0720375	-0.064137	0.906752	0.138186	-0.15911	1.58929	-0.0515853	-0.0962222	0.736891	-0.179377	1.49345
ADH4	-0.692514	0.309494	0.390363	0.669699	0.932486	-0.210614	0.174892	-0.202716	-0.703202	-0.697834	-0.595371	-0.731149	0.0153705	-0.389161	1.39106	-0.291042	-0.47468	-0.974061	-0.689389	-0.838868	-0.0378369	-0.375532	-0.0638711	-0.166504
ADH5	0.256786	0.0882473	0.228077	0.600455	0.264187	-0.496418	-0.950924	0.087046	0.511023	0.0894146	0.234966	0.596672	0.0510028	-0.579886	-0.763402	-0.155767	0.109494	0.160455	0.263322	0.351173	-0.1324	-0.893579	-0.628248	-0.330662
ADH6	-0.388005	-0.266426	-0.0959818	-0.413701	0.180648	0.211536	0.282517	0.191187	-0.280522	-0.251719	-0.17471	-0.378497	0.771664	0.0187225	0.357624	0.155649	-0.120151	-0.287769	-0.1884	0.0222842	0.31838	0.338241	0.707641	0.200643
ADH7	-0.47974	-0.728206	-0.67274	-0.757938	-0.171425	-0.140946	0.0463344	-0.00046375	-0.343421	-0.584401	0.89119	0.607708	0.783643	-0.363089	0.0677306	0.183517	0.036948	0.0921438	-0.385938	-0.814909	0.0077859	0.109542	-0.0751225	-0.1179
ADHFE1	-0.53442	0.387429	-0.723876	0.956771	-0.87689	-0.500768	0.225267	0.746222	0.0564146	0.477512	-0.269493	0.885664	0.0774163	0.504755	-0.161216	-0.136482	0.59323	1.49175	1.81552	-0.120927	-0.504269	-0.947605	-0.769607	-0.838096
ADI1	0.0347261	-0.132671	0.0474081	0.146568	-0.611671	-0.904491	-0.408908	-0.618351	-0.34787	-0.383936	-0.567018	-0.16395	-0.706571	-1.17248	-0.415341	-0.549124	1.42842	0.932644	1.06838	1.50359	0.722638	0.53366	1.11341	0.776489
ADIG	-0.571756	-0.573422	1.60739	-0.575531	0.280756	0.0185301	0.169142	0.0192713	-0.460866	-0.458	-0.344875	-0.505323	0.202351	0.387498	0.210782	-0.0152779	-0.344389	0.867096	-0.37768	-0.512146	0.147743	-0.188766	0.0750878	-0.0260919
ADIPOQ	-0.686909	-0.67974	-0.469737	-0.520313	0.142218	-0.0753671	0.237783	-0.117082	-0.536479	-0.405533	-0.332127	-0.577617	0.22952	0.168851	0.180843	0.524321	-0.352972	-0.494691	0.201907	-0.656535	0.0574635	-0.0677894	-0.0104352	0.0938743
ADIPOR1	0.0640279	0.0992286	0.123756	-0.0618809	-0.863691	-0.712413	-0.394987	-0.499918	0.101725	0.226911	0.161087	0.0609588	-0.68895	-0.460981	-0.221671	-0.285949	0.92713	0.949042	0.955986	1.12663	0.346355	0.625186	0.957244	0.823309
ADIPOR2	0.0634368	0.0521724	0.0373597	0.412027	-0.603741	-0.79656	-0.283789	-0.394759	0.321907	0.290931	0.337446	0.593497	-0.487793	-0.532867	-0.189446	-0.316278	0.258791	0.183179	0.264169	0.698666	-0.25459	-0.0688742	-0.15484	-0.235653
ADIRF	-0.0413124	0.156934	-0.569331	-0.48621	0.329619	-0.529788	-0.230885	-0.0863736	-0.942608	0.0685412	-0.26282	-0.327087	-0.226616	-0.694397	-0.167284	-0.607954	0.153635	0.985039	1.79891	1.23649	-0.196614	1.41119	-0.266506	0.202199
ADIRF-AS1	2.28203	2.89644	2.18468	2.46126	0.48043	1.14253	0.00251431	1.53564	-0.00184253	1.07796	-1.04391	-0.0374573	-2.69071	0.142556	-2.00785	-0.764169	-1.06628	1.3799	0.874396	0.0356906	-1.18756	-0.995589	-0.479075	-2.08011
ADK	0.100715	0.382837	0.061602	0.559124	0.0881294	-0.558126	0.602745	0.496471	1.16326	1.09363	1.39667	1.37504	-0.241535	0.204649	0.230783	0.565024	-0.346587	-0.368254	0.166453	-0.377893	-0.426868	-1.00039	-0.906602	-0.756574
ADM	0.140168	-0.109145	0.270934	-0.759099	-0.773053	-0.929225	-0.722593	-0.90405	-0.0965736	-0.103403	0.317875	-0.565942	-0.718937	-0.366088	0.0568542	2.02721	4.37426	4.05342	3.85726	5.59862	9.87478	6.84351	6.4099	9.87478
ADM2	0.00138295	-0.354077	-0.252623	0.745701	0.293551	0.475529	-0.508496	-0.926107	-1.1216	-1.02033	-0.851471	0.251084	-0.353149	0.588771	-0.227979	-0.546122	1.55063	1.49012	1.60156	2.11941	1.96749	1.59474	0.793231	0.921375
ADM5	-0.346565	-0.371157	-0.284866	-0.421902	0.128195	0.214934	0.269322	0.918024	-0.260683	-0.227255	-0.06759	-0.389002	0.280132	0.0406739	2.75554	0.136218	-0.0666264	0.17106	-0.169923	-0.35636	0.254351	-0.0286264	0.19188	1.17921
ADNP	0.366239	0.324447	0.265473	0.570381	0.243961	0.153612	-0.543246	-0.17807	0.387551	0.256727	0.257021	0.621656	0.128435	-0.315136	-0.552597	-0.0492893	-0.421094	-0.370506	-0.414785	0.129711	-0.525627	-0.684878	-0.807193	-0.715417
ADNP2	0.384791	0.740758	1.09576	0.213486	-0.544411	-0.442981	0.484976	0.0189654	0.154694	0.341518	0.435709	0.0312636	-0.563473	-0.0643467	0.867795	-0.758313	0.311351	0.0810299	0.290945	-0.102114	-0.404642	-0.750286	-0.127776	-0.203988
ADO	-0.0460581	0.0576846	0.465449	0.727471	1.92398	0.378328	-0.629938	-0.287553	0.395351	-0.722006	0.540104	0.687907	2.38135	0.351837	-0.711871	-0.393069	-0.280569	0.0951485	0.303577	0.332373	0.858432	-0.394763	-1.18614	-0.390041
ADORA1	-0.33901	-0.352455	-0.325212	-0.259704	0.303362	0.433645	0.446684	0.584843	-0.231311	-0.224899	-0.159819	-0.230369	0.495914	0.230325	0.578969	0.353269	-0.0512903	-0.239792	-0.212505	-0.145811	1.1768	0.206939	0.458317	0.377073
ADORA2A	0.093296	0.125809	-0.428419	0.0694379	-0.812552	-1.07127	-0.555561	-0.305516	0.581848	0.241912	-0.254169	0.939785	-0.016648	-0.89973	-1.75971	-0.232234	-0.0435507	0.708251	0.289003	0.652003	-0.104707	0.308035	0.0279186	0.67449
ADORA2A-AS1	-0.450502	-1.11654	-1.01867	-0.81862	0.565988	-0.27851	0.129124	0.135261	-0.213739	-0.209918	-0.306818	-0.499036	-0.181697	0.604253	0.181907	0.117782	-0.772142	-0.97248	0.767758	0.27633	0.428438	-0.203988	-0.0136323	1.12663
ADORA2B	-0.670888	-0.645785	-0.634924	1.21565	0.0913256	0.0131182	0.156355	-0.0287203	-0.569324	-0.562805	-0.468997	-0.511058	0.176837	-0.25474	2.49778	-0.0120946	-0.488976	-0.685538	0.276604	-0.490706	0.147936	-0.153366	0.0201645	-0.0246469
ADORA3	0.0420758	-0.312868	-0.272947	-0.268272	0.387965	0.371347	1.005	0.352112	-0.224168	-0.186484	-0.0468036	-0.21291	0.537239	0.156794	0.613099	0.413975	-0.00304607	-0.187891	-0.113495	-0.135298	0.588297	0.178875	0.47027	0.337218
ADPGK	0.336988	0.599428	0.385983	0.546257	-1.09537	-1.07947	-0.829012	0.457276	0.288624	0.668759	0.486125	0.488603	-0.638003	-0.862408	-0.440591	0.593091	0.148741	0.21057	0.674178	0.29495	-0.751107	-1.04968	-1.02269	-0.38682
ADPRH	1.04743	1.1954	1.05207	1.47966	2.23239	1.53564	0.876137	0.88538	0.106629	-0.199437	-0.362248	0.0872109	0.821817	0.161424	-0.74455	-0.651945	0.0782179	0.513275	0.369388	0.253119	-0.374031	-0.592858	-0.843841	-0.855715
ADPRHL1	-0.125177	-1.872	-0.866477	-0.637252	0.220679	-0.245359	-0.429148	-1.10753	-0.585358	-1.50672	-1.02979	-1.62757	-0.734385	0.545995	-0.584307	0.204856	1.91094	1.67009	1.71175	1.98162	1.05817	1.16443	1.58148	0.740237
ADPRHL2	-0.0603741	0.259956	0.141879	-0.0172826	-0.205134	-0.497033	-0.326954	-0.404532	0.177119	0.382531	0.384623	0.00165317	-0.273906	-0.950818	-0.312081	-0.651566	0.558446	0.182112	0.240805	0.55587	-0.079124	0.323883	0.0920123	0.501205
ADPRM	0.518926	0.514016	0.571808	0.136182	-0.875288	-0.968418	-0.786415	-0.78118	1.9007	2.04031	2.46152	1.65144	0.428212	0.403171	0.196857	1.19557	-0.0881349	-0.0717659	0.448368	-0.14536	-1.45193	-1.30453	-1.27046	-1.05257
ADRA1A	-0.222369	0.17663	-0.21681	0.146412	-0.302394	0.103011	0.38834	-0.232001	-0.18078	-0.0367865	0.226196	-0.312022	-0.215547	0.560337	0.298224	-0.216432	-0.408404	-0.0660569	-0.473893	-0.562221	-0.226645	0.590632	-0.119207	-0.323967
ADRA1B	-0.532951	1.62868	-0.475615	0.825436	2.24487	2.41311	0.13367	3.12888	-0.442037	-0.399428	-0.270572	-0.598989	0.31768	-0.215325	0.119112	-0.16447	-0.268993	-0.480533	0.248167	-0.686417	0.048799	-0.227826	0.00712202	-0.0835261
ADRA1D	-0.265512	-0.316057	-0.342565	-0.288398	0.242715	0.278292	0.399179	0.949659	-0.191224	-0.196299	0.0901171	-0.339905	0.436297	0.0181997	0.403305	1.11272	0.00956157	0.0118421	-0.176527	-0.278438	0.525108	0.018064	0.31536	0.794494
ADRA2A	-0.871933	1.28862	0.442515	-0.0678152	0.424959	-0.668902	-0.337399	0.740758	0.0534628	0.561001	-0.963977	-0.3391	-0.287776	-0.788182	-0.277584	-0.722234	1.15971	0.994367	1.14275	1.0568	-0.277574	-0.662527	-0.362438	-0.540734
ADRA2B	-0.087641	-0.635074	-0.590802	-0.178601	0.0849524	-0.0980684	1.20829	0.447742	-0.515585	2.1022	-0.445929	-0.598616	0.137487	-0.322947	0.0682346	-0.139072	-0.0890991	-0.625126	0.175617	0.61475	0.0553134	-0.251402	-0.0625142	-0.142743
ADRA2C	0.434647	-0.275666	0.74695	0.0593522	-1.0075	-1.25995	-0.252837	-0.500768	0.243824	0.370417	-1.01883	0.0399808	0.135747	0.844805	-1.19088	-1.41973	-1.16362	0.297963	0.988415	-2.28587	-0.226791	0.2658	-0.383456	-0.173844
ADRB1	-0.0344895	-0.616919	-0.320054	-0.497033	0.359558	1.17677	0.897078	1.78442	-0.488417	-0.49033	0.188231	-0.493531	0.223763	0.434164	0.870916	0.857268	-0.0948473	-0.625453	-0.434599	-0.527193	0.235364	-0.137567	0.565458	0.966528
ADRB2	1.60975	0.589975	1.89776	2.34092	1.52388	1.27485	-1.06518	-0.285713	0.0543206	-1.06516	-0.421142	0.544295	1.63763	0.433598	-1.4681	-0.758401	-0.309185	0.249072	0.300794	0.478726	-0.0556781	-0.464284	-1.1686	-0.505711
ADRB3	-0.554611	-0.796163	0.683534	-0.830804	0.1701	-0.641668	0.844462	0.554402	-1.05725	0.388109	-1.16694	-0.427135	-0.668838	3.48864	1.08689	0.939196	0.685335	-0.520671	0.0778179	-0.05498	-0.562629	0.552312	0.244592	0.539205
ADRM1	0.30425	0.135964	0.187296	0.245198	-0.333816	-0.346763	-0.119369	-0.360593	0.170577	-0.0757492	-0.0613148	0.149697	-0.4455	-0.548108	-0.608492	-0.69937	1.76827	1.40138	1.42449	1.61649	1.1819	1.34346	1.29825	1.20263
ADSL	-0.0127673	-0.0270808	-0.175763	0.143674	0.261516	-1.00988	-0.625627	-0.298392	-0.0276331	0.0117276	-0.0578333	0.218271	0.225818	-1.80864	-0.739208	0.000729305	1.61257	1.33543	1.1898	1.55139	1.95926	0.92427	1.32243	1.44737
ADSS	0.359115	0.402069	0.381563	0.638159	-0.410746	-0.341371	-0.650142	0.0907065	0.199772	0.35404	0.387476	0.437139	-0.586864	-0.969334	-0.694868	-0.249742	0.304409	0.27183	0.506137	0.377844	-0.415205	-0.596586	-0.64567	-0.404401
ADSSL1	-0.0181578	0.172371	0.24468	0.622172	-1.35819	0.274079	-1.2044	-1.4377	1.18889	0.880388	1.18614	1.47865	-1.41001	0.598999	-0.751677	-1.12335	0.599496	0.770759	-0.48466	0.610454	-0.130335	-0.392982	-0.461867	-0.565013
ADTRP	-0.944768	-1.06861	-0.949771	1.38112	-0.460215	-0.470612	-0.232263	-0.527037	-0.892784	-0.861032	-0.537042	-1.00143	-0.21672	-0.57909	-0.185101	-0.449138	2.66362	3.15927	3.58841	2.94782	-0.134574	0.897444	2.48431	3.60543
AEBP1	0.602745	-0.331137	0.0669728	0.12737	-1.89165	0.621316	-1.56922	0.385364	1.13906	0.908382	0.291351	0.502952	0.266253	0.432814	0.184226	1.72243	-2.4619	-2.26111	1.13044	-2.50613	-4.63553	-2.38543	-1.49786	-0.636827
AEBP2	0.486305	0.419438	0.493237	0.323652	0.14342	-0.00170484	-0.340165	-0.506289	0.593261	0.266417	0.269995	0.276228	-0.543158	-0.10303	-0.375044	-0.264863	0.104394	0.00189453	-0.271308	0.282798	-0.554244	-0.589688	-0.550773	-0.654495
AEN	0.111525	0.269584	0.381065	0.0414787	-0.883772	-1.52049	-0.506415	-0.763709	0.173812	0.572796	0.69917	0.257159	-0.735511	-1.22524	-0.00848676	-0.595543	0.736891	0.559384	0.846968	0.771583	-0.417984	-0.480236	-0.176	0.0370041
AFAP1	-0.71931	0.13762	-0.689046	-0.565081	1.22194	0.0911896	0.148145	0.0356535	-0.617576	-0.607516	-0.519182	-0.506818	0.145316	-0.183832	1.00879	-0.0263206	-0.536722	0.964663	-0.824069	-0.505277	0.129534	-0.131053	0.0627585	0.0066742
AFAP1-AS1	-0.519725	-0.408653	-0.409523	-0.494432	0.130156	-0.0746498	0.267394	-0.0466816	-0.556955	-0.560579	-0.424186	-0.628958	0.133383	-0.141918	0.219956	-0.202035	1.47805	0.0736122	-0.238695	1.05817	0.486779	-0.195388	-0.0497334	-0.0032426
AFAP1L1	0.181583	-0.911246	-0.868808	-0.79399	0.172899	-0.187443	-0.000666285	-0.241764	0.950062	-0.1136	0.592896	-0.710134	-0.00361203	-0.381563	0.0237	-0.257419	-0.780495	-0.0287319	1.5631	-0.778716	-0.037094	-0.327883	-0.10899	-0.170561
AFAP1L2	0.608501	0.416554	0.35069	0.626162	1.16153	0.147325	0.915739	0.09907	0.238719	0.19945	-0.149319	0.323446	-0.136542	1.82522	-0.653102	-0.284817	-0.112881	-0.980278	-1.07374	-1.751	-1.71678	-2.07792	-1.25339	-2.74035
AFDN	1.83629	1.5504	1.92398	1.40148	0.508952	0.592344	-0.105131	0.163433	0.999879	-0.292679	0.067701	-0.182438	-0.8258	-0.923011	-0.208321	-1.43497	0.527835	0.371694	0.563616	0.216738	-0.748625	-0.534821	-0.945657	-0.967478
AFDN-DT	-0.0388527	-0.404894	-0.260521	-0.418663	0.295461	0.597143	0.272997	0.164348	-0.283394	-0.0860149	-0.209837	-0.34914	0.340554	0.00165317	0.319061	0.422033	-0.0110328	-0.294747	-0.147874	-0.300901	0.313312	-0.0122879	0.245157	0.115903
AFF1	-0.154554	-0.234236	-0.0723303	0.163047	-0.793056	-0.736722	-0.878251	-0.86864	1.0242	0.950855	1.26644	1.06035	-0.339751	0.509001	0.0165757	0.354998	0.53025	0.0478155	0.319629	0.256854	-0.375985	-0.341359	-0.332709	-0.0990764
AFF2	-0.560772	-0.228269	-0.531094	-0.596773	0.17853	0.482949	0.168194	-0.00631195	-0.0533833	-0.446015	-0.0355898	-0.448443	0.239251	-0.241726	0.204946	0.010379	-0.253434	-0.172269	0.644357	-0.130161	0.20753	0.0572607	0.0640992	-0.0149257
AFF3	1.00983	0.425261	0.892825	0.58565	-0.993545	-0.308761	-0.886911	-0.906915	1.57061	1.6617	1.77349	1.62236	-0.0375582	0.682248	0.84713	0.66972	-3.97911	-3.82478	-0.137018	-4.37783	-5.04064	-5.11111	-4.77127	-4.56341
AFF4	0.484465	0.538648	0.599241	0.300166	-0.784105	-1.20663	-0.494432	-0.41126	1.04312	1.17854	1.13108	0.81097	-0.269493	-0.380104	0.202307	0.752348	-0.0343769	-0.0200026	0.258316	-0.0178901	-0.831258	-1.33204	-0.718311	-0.719366
AFG1L	-0.054546	0.338455	0.059286	0.0321355	0.151224	-0.0497511	0.0910141	0.0618911	-0.314751	-0.257871	-0.655401	-0.422133	-1.55356	-0.880712	-0.590876	-1.07046	0.710725	0.67449	0.128783	0.858305	0.295492	0.56641	0.616769	0.723638
AFG3L1P	0.469493	0.295386	0.136613	0.433761	-1.31646	-1.42493	-1.14591	0.563188	0.967846	0.689467	1.01648	1.24694	-0.592073	-0.258333	-1.16456	0.947781	0.474999	0.147259	-0.347269	0.209035	-0.876503	-0.456874	-1.21092	-0.112238
AFG3L2	0.0606031	0.156636	0.0486893	0.258557	0.0812821	-1.08854	-0.687047	-0.00951095	-0.291615	0.044047	-0.0489257	0.135747	0.0752016	-0.834016	-0.324576	0.137584	0.435457	0.506304	0.644562	0.73779	0.938385	-0.52346	0.0399719	0.526679
AFM	-0.425818	-0.465099	-0.322668	-0.446492	0.0735308	0.144469	0.258087	0.072975	-0.31564	-0.289861	0.206246	-0.534951	0.239829	-0.167284	0.777001	-0.126357	-0.11439	-0.338612	-0.338884	-0.553366	0.280287	-0.125704	0.16349	0.107639
AFMID	-0.405746	0.343506	-0.398404	0.279104	-0.0339544	0.186436	-0.415029	0.453169	-1.99197	-1.53345	-1.56436	-1.66917	-1.29689	-0.586452	-0.803898	-1.16183	0.721639	1.02165	0.427728	1.09044	0.550315	1.12564	0.998314	0.579909
AFP	-0.554482	-0.525189	-0.484204	-0.605592	0.583326	-0.00752432	0.151038	0.0188314	1.43507	-0.432063	-0.26021	1.07477	0.148722	-0.237935	0.215919	-0.110818	-0.303211	-0.473017	-0.373052	-0.633403	0.0995142	-0.273552	0.0765305	-0.0420668
AFTPH	0.24242	0.168194	0.0759288	0.242668	0.236449	0.177749	-0.498344	0.0968807	0.165187	-0.162551	-0.382676	0.119488	-0.210298	-0.22825	-0.74972	-0.422932	0.434561	0.445722	0.09632	0.580474	-0.197463	-0.228899	-0.398618	-0.0695752
AGA	0.00215721	0.337517	0.239531	0.178872	-0.30409	-0.760001	-0.527037	-0.433246	-0.0882362	0.174723	0.339789	0.271566	-0.385592	-0.722587	-0.783698	-0.427557	1.1241	1.36959	1.54021	1.74596	1.23278	0.563584	0.648074	1.173
AGAP1	-0.68813	-0.816923	-0.164528	-0.840541	-0.285857	0.837408	-1.09381e-05	-0.215666	-0.723342	-0.642947	-0.524388	-0.816278	-0.0169027	-0.429183	0.0321481	0.397505	-0.544778	0.898627	0.292761	-0.946868	0.0763123	0.869247	1.88037	2.17631
AGAP1-IT1	-0.749105	-0.718443	-0.673267	-0.847902	-0.176441	-0.254791	0.00390083	-0.252933	-0.0167766	-0.620192	-0.493766	-0.411572	0.0159948	-0.417088	0.0589989	-0.288851	0.301387	-0.76682	0.307343	0.468696	0.831328	0.71714	1.66467	1.37802
AGAP11	0.0647647	-0.138832	-0.300878	0.236266	0.67361	-0.803536	-0.813221	-1.01672	0.207972	-0.0866162	-0.560693	0.183745	0.136999	-0.0638221	-0.352755	-0.569074	1.35461	1.35193	1.05327	1.20773	1.05869	0.601232	0.946322	0.835445
AGAP2	0.321253	0.24107	0.0653649	0.315325	1.39621	0.592164	0.0574508	0.0817301	0.0905553	-0.172061	-0.483888	0.139496	0.728368	0.467339	-0.379083	-0.349956	0.339504	0.257215	-0.359658	0.182701	0.281977	0.0800214	-0.416052	-0.320362
AGAP2-AS1	0.696218	0.0223032	0.231355	0.250555	-0.527907	-0.213682	-0.084032	-0.765132	0.333201	0.0615517	-0.421955	-0.0492893	-0.656356	-0.156263	-2.53965	-0.46241	0.672291	0.906988	1.33067	0.425249	-0.171521	0.310762	-1.20996	-0.451362
AGAP3	0.699724	0.621123	0.590307	0.362102	0.391098	0.479359	-0.267605	-0.356695	-1.98228	-3.31209	-3.36659	-2.9956	-1.28712	-2.24282	-1.68747	-3.36659	1.18944	1.29897	0.292863	1.20144	0.738043	0.453267	-0.502367	-0.431182
AGAP4	0.435219	0.454973	0.159316	0.254856	-1.42291	-1.49193	-0.770761	-0.435213	0.450383	0.733567	0.275561	0.107833	-2.17689	-0.972731	0.116795	0.28799	0.551662	0.36876	0.57516	0.012722	-1.71353	-0.719817	-0.733642	0.39574
AGAP7P	0.592616	0.0777604	-0.185065	0.177553	0.507314	-0.658948	-0.617063	0.0706969	0.420196	0.132974	-0.133173	0.182372	0.479947	-0.736973	-0.395787	0.0408484	0.766754	0.105464	0.132992	0.179317	0.443015	-0.285646	-0.536607	-0.354597
AGBL1	-0.212523	-0.310196	-0.458962	-0.0649951	-0.275719	-0.0346914	0.473531	0.189698	-0.377573	0.0286808	-0.41225	-0.0935468	-0.079954	1.09142	0.168606	-0.478286	0.189747	0.195912	-0.132457	0.197376	0.171257	0.450402	0.361101	0.701801
AGBL1-AS1	-0.279024	-0.297509	-0.191778	-0.381329	0.209984	0.265808	0.311226	0.205891	-0.175397	-0.145883	0.0355803	-0.33651	0.339359	0.0829029	0.344618	0.206473	0.0646251	-0.131483	-0.108059	-0.277449	0.337345	0.0316246	0.247927	0.164923
AGBL2	0.359065	0.316474	0.0830452	0.383482	-0.582925	0.226989	-0.999395	0.181317	1.48401	1.2619	1.19794	1.61509	0.0368271	1.04977	-0.409795	0.545995	-2.75293	-2.36978	-1.677	-2.83039	-2.94426	-2.63774	-3.38458	-2.1034
AGBL3	0.213587	-0.41011	0.40188	-0.0229037	-0.27435	-0.410369	-0.197187	-0.333192	0.27552	-0.0496469	-0.368159	0.306615	-0.083967	-0.243258	-0.423266	-0.0542604	0.172589	0.0631393	0.750912	0.260024	0.106596	0.353565	0.13271	0.305793
AGBL4	-0.0663168	-0.110078	-0.325337	-0.16683	-0.652364	0.461817	0.195388	-0.211025	-0.00326242	0.0172984	0.568585	0.261674	-0.00521388	0.354655	0.393183	-0.77454	-0.258436	0.0599416	0.31702	-0.995589	-0.197298	0.355018	0.135805	-0.429747
AGBL5	0.190238	0.850503	0.464266	0.369198	-0.819632	-1.45136	-0.933864	-0.744101	0.134653	0.155327	0.213364	0.08293	-1.55463	-2.19998	-1.80164	-0.946427	1.26312	0.751265	0.829637	1.05895	0.00535077	0.225251	-0.0540593	0.193137
AGER	0.131233	0.141189	0.22399	0.726039	-0.874938	0.2052	-0.599005	0.335421	0.260106	0.484254	0.555181	0.734074	-0.793081	0.399137	-0.942608	0.0209535	0.118486	0.0716255	0.536576	0.141717	-0.788469	-0.107287	-0.712996	0.0314605
AGFG1	0.00828402	0.155535	0.289322	0.222303	-0.3186	-0.889962	-0.345592	-0.710305	0.335456	0.426244	0.643857	0.547393	-0.0257419	-0.0817546	0.46679	-0.165062	-0.0986877	-0.132615	0.281579	0.0254499	-0.625859	-0.827451	-0.509853	-0.34708
AGFG2	0.271584	0.329784	0.572495	0.721638	-0.120753	0.915739	0.361025	0.945357	-0.783046	-0.186082	-0.373074	-0.415879	-0.457489	-0.423462	-0.553343	-0.766608	-0.276369	0.658865	-0.663089	0.244109	0.0720335	0.694996	-0.199662	1.09825
AGGF1	0.425094	0.17673	0.275781	0.389846	-0.164935	-0.209685	-0.790015	-0.216987	0.630932	0.335774	0.415366	0.702088	-0.0879364	-0.454585	-0.49604	0.356883	0.142743	0.158498	0.00406825	0.246027	-0.456273	-0.704428	-0.572872	-0.599071
AGK	0.17262	0.231745	-0.00859872	0.312543	-0.158209	-0.445734	-0.444706	-0.412402	-0.043501	0.22593	-0.286583	0.0409453	-0.291682	-0.158853	-0.531907	-0.577719	2.04509	1.88709	1.63275	1.84813	1.86475	1.75704	1.59386	1.92381
AGL	0.224721	0.273791	0.36928	0.722076	0.336263	0.253694	-0.757528	-0.287436	0.282474	0.216578	0.364916	0.747154	0.121093	0.0572409	-0.705273	-0.142084	-1.02013	-1.18756	-0.573279	0.0251425	-0.70266	-0.974842	-0.806697	-0.987304
AGMAT	-0.237738	0.00257793	-0.167506	0.0260546	0.730848	0.301085	0.752252	0.326484	-1.49898	-1.28712	-1.36159	-1.46415	-0.702814	-1.97399	-1.0322	-2.4747	0.664222	0.912706	0.91561	0.634729	-0.127713	0.233083	0.635711	0.345144
AGMO	-0.639463	-0.632793	-0.623194	-0.634924	0.117822	-0.00932228	0.108816	-0.0718262	-0.529781	2.13154	-0.47913	-0.533644	0.183431	-0.257787	0.133964	-0.0625071	-0.446374	-0.659237	-0.64593	-0.508111	0.137152	0.113674	-0.00601482	-0.0669261
AGO1	0.12004	0.0560693	0.00972019	-0.0162489	-0.381034	-0.704155	-0.294034	-0.654366	0.483252	0.427012	0.374599	0.436451	-0.187363	-0.0807309	-0.102955	-0.257787	0.233636	0.252569	-0.134109	0.238493	0.272376	-0.368156	-0.313509	-0.23844
AGO2	0.0348416	0.083797	-0.104977	-0.213019	-0.674397	-1.32859	-0.722131	-1.48679	0.987781	1.03728	0.920154	0.746134	-0.737228	0.229344	0.778645	0.0337222	0.460563	0.27354	0.40704	0.369224	-0.348696	-0.469763	-0.404966	-0.487346
AGO3	0.337989	0.286511	0.262371	0.169864	-0.620841	-0.583109	-0.425989	-0.899335	0.427113	0.454086	0.298894	0.271262	-0.492935	0.215536	-0.105714	-0.40411	0.261918	0.130809	0.0334947	0.24125	-0.40019	-0.283744	-0.332347	-0.105406
AGO4	-0.0873327	-0.197096	0.146599	0.144908	0.0529015	-0.498885	0.268598	-0.239161	0.767732	0.769915	0.829528	0.943771	0.0403981	0.548778	0.910462	0.477827	-0.50883	-0.0129046	0.649298	0.0364308	-0.970815	-1.46639	-1.64821	-1.83229
AGPAT1	-0.133295	-0.0804255	-0.292621	-0.126366	-0.240602	0.0877636	-0.0428447	-0.164935	-0.219811	-0.265565	-0.544452	-0.156062	-0.249059	-0.127068	-0.407576	-0.461294	0.606492	0.543828	0.215508	0.547236	0.303934	0.66885	0.93073	0.875418
AGPAT2	0.078408	0.0994389	0.213923	-0.161861	-0.0903216	0.462853	0.431288	-0.0132332	0.45877	0.192385	0.256294	0.167047	-0.219149	0.269551	-0.0923664	-0.236004	0.238701	0.217046	-0.134482	0.124324	-0.539952	0.00698326	-0.343503	-0.70003
AGPAT3	-0.267076	0.258473	-0.082987	0.0350539	0.313597	-0.364976	-0.484107	-0.273291	-0.54407	0.0843976	-0.327015	-0.0522559	-0.0971023	-0.404203	-0.456193	-0.415006	0.586991	0.770273	0.519091	0.939829	1.28453	0.747573	0.667885	0.929405
AGPAT4	0.152652	0.189632	-0.188546	-0.114719	-0.713047	-1.30595	-0.41286	0.942184	0.717674	1.03435	0.43833	0.642793	-0.998032	0.11454	0.611232	1.05887	0.557642	0.70704	1.03584	-1.11237	-1.95034	-2.17348	-1.79945	-1.60609
AGPAT4-IT1	0.492563	0.282761	0.00297339	0.558293	-0.542541	-0.843532	-0.627732	0.910858	1.07514	1.40689	1.01047	1.19462	-0.544452	0.382074	0.777547	1.50234	-0.419273	0.214426	1.07657	-1.67655	-3.33029	-3.25456	-3.89553	-1.6712
AGPAT5	-0.177089	-0.129693	0.120074	0.545973	-0.142518	0.137577	-0.0552391	-0.483261	1.18552	1.14296	1.30919	1.78561	0.362705	0.576645	0.777709	0.633385	-1.92462	-1.94721	0.177851	-0.87765	-1.42481	-2.24035	-1.93311	-2.10819
AGPS	0.0179907	0.2045	0.075783	0.0982939	0.0775073	-0.184159	-0.174542	-0.477278	-0.0931528	0.11433	-0.279273	0.0602786	-0.546408	-0.665401	-0.329568	-0.690729	0.815391	0.57977	0.536127	0.79945	0.376192	0.333438	0.60843	0.537039
AGR2	-0.627862	-0.900759	-1.32506	-1.26775	-0.616522	0.910161	-0.327363	-0.640483	-1.21663	-1.19184	-1.03196	0.260345	-0.361907	0.282474	0.819663	-0.718236	0.525867	0.89076	0.943378	0.348974	-0.301067	0.980147	0.0062649	0.749793
AGR3	-0.35493	-0.353624	-0.3086	-0.246057	0.383053	0.394187	0.53224	0.388212	-0.26833	-0.232503	-0.10792	-0.192778	0.556521	0.195294	0.67755	0.439011	-0.0807377	-0.250966	-0.141738	-0.122956	0.626	0.475909	2.76098	0.376249
AGRN	0.729441	-0.0645709	0.229875	0.194243	-0.701024	0.429459	-0.440648	0.45934	0.452064	0.400965	0.277422	0.444597	0.662363	0.732949	-0.00161993	1.17356	-1.51178	-1.1729	-0.17857	-1.15301	-1.20859	-0.746461	-1.10633	-0.3677
AGRP	-0.430575	-0.217386	-0.0298415	-0.000880266	-0.255431	0.542877	0.192177	-0.411384	-1.80164	-1.02793	-0.921984	-1.95937	-1.37841	0.951606	-0.298827	-2.29293	1.8492	1.42015	1.776	2.43455	2.00538	1.3123	1.19257	1.04271
AGT	-0.346849	-0.182466	-0.334012	-0.265725	0.346853	0.383132	0.5853	0.370083	-0.218288	-0.22197	-0.0825373	-0.181505	0.692635	0.180843	0.612258	0.390374	-0.0539169	-0.113937	-0.109551	-0.102308	0.597678	0.193884	0.637431	0.379503
AGTPBP1	0.256926	0.212095	0.300976	0.142647	0.43712	-0.660727	0.0401679	-0.461575	0.439162	0.310911	0.403249	0.0642993	-0.0277766	-0.593377	0.473873	-0.461494	0.222091	0.322858	0.833575	0.1432	-0.239915	-0.883306	-0.568802	-0.788173
AGTR1	-0.272832	-0.303369	-0.224626	-0.399138	0.176662	0.264307	0.320134	3.25113	-0.157907	-0.134156	0.0581481	-0.374618	0.327652	0.0571977	0.351942	0.150976	0.0868307	-0.127374	-0.182526	-0.326879	0.352317	0.40094	0.260746	0.187208
AGTR2	-0.283433	-0.136951	-0.259883	-0.293051	0.376363	0.586409	0.415126	0.311942	-0.154625	-0.140807	-0.0611479	-0.25589	0.544095	0.167548	1.05255	0.611346	0.0346353	-0.148086	-0.0327317	-0.0168047	0.532236	0.145305	0.375605	0.607072
AGTRAP	-0.0687942	0.357902	-0.0241107	0.169528	-0.318652	-0.0579802	-0.326752	0.394112	-0.0226636	0.298271	0.0539985	0.184827	-0.150097	-0.524625	-0.755364	0.215555	0.362408	0.753019	0.15215	0.829081	-0.801425	0.683585	-0.409384	0.148632
AGXT	-0.0251581	-0.223093	0.0926467	-0.419295	-1.35965	0.753668	0.183336	-0.324351	0.202062	-0.545365	0.210412	-0.419626	-1.34869	0.995164	-0.275184	-0.175376	0.151438	0.316191	-0.465454	0.29848	-0.196332	0.688083	1.19078	0.488961
AGXT2	-0.318101	-0.291435	-0.28483	-0.332164	0.432724	0.283991	0.384458	0.247586	0.0811216	-0.194762	-0.123272	-0.261985	0.557244	0.0905553	0.460444	0.322543	-0.0348258	-0.178654	-0.00432372	-0.153399	0.550548	0.127703	0.336322	0.274355
AHCTF1	0.472927	0.708719	0.42855	0.380922	0.0119419	-0.515824	-0.377216	-0.371085	0.532105	0.540798	0.45871	0.331475	-0.101525	-0.0472222	0.206408	0.221127	-0.051824	-0.133807	-0.00834669	-0.0143718	-0.397615	-0.879541	-0.70318	-0.615318
AHCY	0.0648497	0.0476759	0.170455	0.230158	-0.933165	-1.58108	-0.872198	-0.638603	0.214417	0.395716	0.278576	0.489621	-0.358634	-1.94171	-1.24774	-0.408394	2.48874	1.81427	1.64723	2.60808	1.96474	1.37696	1.7626	1.69574
AHCYL1	0.208201	0.109769	-0.0958864	0.313998	-0.24242	-0.441439	-0.589842	0.123806	0.443703	0.156935	0.288998	0.48173	-0.16066	-0.0466144	-0.685552	0.244602	0.44195	0.344143	0.057866	0.46246	-0.355426	-0.607665	-0.589393	-0.270075
AHCYL2	0.554575	0.832933	0.328029	0.747823	0.692504	-0.136386	0.0185301	0.619557	0.0164638	0.455076	-0.170314	0.326313	-0.28359	-1.23778	-0.303294	-0.302336	0.155278	0.205376	0.210239	0.382571	-0.562383	-1.178	-0.921327	-0.895651
AHDC1	0.51917	0.401634	-0.130997	-0.167019	-0.08867	0.250273	-0.0116157	-0.147798	0.31844	0.162582	-0.421698	0.120653	-0.217971	0.537117	0.131618	0.24654	-0.133699	0.210128	-0.0714598	-1.01771	-0.843064	-0.493276	-0.580122	-0.603667
AHI1	-2.23814	0.624771	0.25378	0.134739	-0.873488	0.511186	-0.271708	0.509193	-2.07045	0.579176	-0.155505	0.0985335	-0.480724	0.460899	-0.25098	0.754035	-0.862218	0.586991	-0.212183	0.357054	-0.463006	-0.27784	-0.282873	0.258129
AHNAK	0.226916	0.822908	0.263591	0.233087	0.882197	-0.446336	-0.00897139	0.227149	-0.994528	-0.603164	-1.14676	-1.35988	-0.784755	-2.12968	-0.924413	-1.61409	0.527184	1.06982	0.230168	0.740556	0.897444	-0.532339	-0.616428	-0.20577
AHNAK2	-0.217035	-0.561674	0.20643	-0.0267944	0.182479	0.405831	0.177191	0.458223	-0.104738	0.0265264	-0.401358	-0.46241	0.687277	0.433318	0.205078	1.14856	-0.106044	-0.548658	-0.480977	-0.0723283	0.786375	0.752727	0.0736122	0.499073
AHR	0.899054	1.16214	0.26897	0.93996	1.34375	-0.167506	1.02723	0.970752	-0.158306	0.0748564	-1.45977	-0.107555	-0.612465	-0.612351	-0.181747	-0.385511	0.536127	0.564088	0.0960981	0.0959662	-0.715738	-1.27421	-0.741835	-0.377464
AHRR	0.269712	-1.12537	-1.04792	-0.277918	-0.394211	-0.144565	-0.0627436	-0.334051	-0.265389	-0.880063	-0.786805	-0.301556	-0.123619	-0.46241	0.298629	0.447738	0.715723	1.48659	0.191494	1.74911	0.91716	-0.439032	-0.129083	-0.264737
AHSA1	0.373752	0.181462	-0.00491905	0.489008	-0.277087	-0.900759	-0.921352	-0.0364031	0.237039	-0.229985	-0.294645	0.396701	-0.420701	-1.34044	-2.02931	-0.406859	0.761899	0.482961	0.118069	0.820943	0.238415	0.236019	0.25277	0.747694
AHSA2P	0.325948	0.278695	0.232046	0.319149	-0.347103	-0.414133	-0.394211	-0.0426883	0.285735	0.386204	0.228906	0.443427	-0.415122	0.296474	-0.319668	-0.00161993	0.20072	0.514549	0.919452	0.299125	-0.805108	-0.506904	-0.698264	-0.113605
AHSG	-1.27782	0.15156	-1.18239	-0.231226	0.245053	1.12306	1.16327	0.821173	-1.09486	0.376334	-0.918662	-1.10129	-0.291636	1.00138	0.865943	0.647685	-0.612427	0.170852	-1.5085	-0.375617	-0.271094	1.63355	-0.326427	1.06126
AHSP	0.725631	-0.711792	1.54318	-0.767143	-0.00284657	0.564746	0.00797135	-0.257152	-0.578394	-0.567377	-0.525484	-0.682656	0.0682346	-0.0242056	0.00507335	-0.242215	-0.504019	-0.510389	-0.646612	-0.730421	-0.00436847	-0.315593	-0.116435	2.55926
AICDA	0.325134	-0.0201958	0.851097	2.72904	3.02854	3.59123	4.68764	3.74782	0.122055	-1.12595	-2.23176	1.10665	3.31014	3.03192	2.90022	2.29238	-1.7747	-0.771761	-1.76913	-0.882748	-1.70311	-1.62662	-1.013	-0.535486
AIDA	0.394187	0.526769	0.305885	0.51177	0.00531043	-0.852607	-0.654286	0.363654	1.07198	0.651504	0.435265	0.662363	0.333539	-0.292341	-0.329225	1.33417	0.400733	0.0790723	0.0159732	0.289111	-0.505466	-0.776349	-0.416893	-0.471881
AIF1	-0.874344	-0.207149	-0.100672	-0.164528	-0.194608	1.15986	-0.0465359	0.941391	-0.543531	-0.00335072	-0.494238	-0.652445	0.211341	1.04039	0.312294	0.940477	-1.46172	1.48982	1.80438	-0.729334	-0.349882	0.807844	-0.112367	1.11593
AIF1L	-0.420002	-0.112378	-0.184462	-0.271109	0.256257	0.152724	0.0663329	-0.19274	-0.915662	0.140525	-0.247523	-0.127328	0.265983	0.380612	0.532621	0.272812	-0.187891	-0.316296	-0.470666	0.122106	0.449551	0.51443	0.849792	0.439625
AIFM1	0.0615584	-0.0973103	-0.155522	0.0748563	0.0587434	-0.346216	-0.348857	0.00541969	-0.456431	-0.952995	-0.722124	-0.0866162	-0.288244	-1.14105	-1.25241	-0.937482	1.69654	1.24574	1.05121	1.57555	1.72458	1.31304	1.34832	1.58044
AIFM2	0.139875	0.150498	0.138038	0.157872	0.557648	0.494168	0.218276	0.372758	-0.00383444	0.0113166	0.0887856	-0.0283564	-0.190108	-0.453509	-0.30354	-0.320902	0.182466	0.0322967	0.0787934	0.188452	0.272169	-0.00186924	-0.21767	-0.335902
AIFM3	2.30677	2.33534	2.81859	1.91776	0.414869	1.34299	0.925545	0.240858	0.701243	0.410686	0.916413	0.946368	-0.921984	-0.407883	-0.77454	-0.811193	-1.62945	0.0191653	-1.04968	-1.51225	-2.01219	-0.93461	-0.862218	-2.39313
AIG1	0.533527	0.245053	0.604776	0.352644	-0.666954	-0.369637	-1.53432	-1.02375	0.0245789	-0.675075	-0.650251	-0.0655182	-0.144932	-0.652604	-1.54921	-0.86988	1.21621	0.942307	0.828647	1.81896	0.484707	0.607381	-0.172598	-0.0601078
AIM2	1.8633	1.39962	1.46203	1.48467	2.45449	1.93657	0.966898	1.60739	-1.0688	-2.52881	-2.25448	-2.38958	-0.203093	-0.412685	-1.69896	-1.53345	0.869896	0.477821	-0.566219	-0.904014	-0.240245	-0.35504	-0.407562	-0.550408
AIMP1	0.000919669	0.0536893	0.352153	0.00710165	-0.293558	-0.456161	-0.619331	-0.136148	0.0600253	0.255783	0.397505	0.148036	-0.33663	-0.569744	-0.438675	-0.383105	0.497849	0.402204	0.624029	0.591139	0.316604	0.241635	0.0756981	0.549193
AIMP2	0.0417507	-0.235973	-0.0828147	0.293451	0.139642	-0.377216	-0.332918	0.0303864	-0.402042	-0.975816	-0.779201	-0.0328226	-0.463111	-1.13778	-1.21334	-0.787554	1.53227	0.851905	0.968947	1.52765	1.52367	0.988069	1.35921	1.44675
AIP	0.279386	0.312913	0.32679	0.148145	-0.266764	0.221463	0.126655	0.153127	-0.188131	-0.158591	-0.276177	-0.0937979	-0.476499	-0.218504	-0.482665	-0.567974	0.450835	0.389429	0.394474	0.15292	-0.492425	0.0485242	-0.238119	-0.291829
AIPL1	-0.500248	-0.529788	1.36379	-0.558596	0.579371	0.0448113	0.151502	-0.0198353	-0.397885	-0.391566	-0.351788	-0.48421	0.236016	-0.193516	0.150144	0.00525772	-0.271921	-0.472197	-0.369861	-0.434235	0.181832	-0.122346	0.0194147	-0.0494032
AIRE	-1.08854	-0.317029	-0.903914	-1.39888	-1.1359	0.747055	0.169933	-0.172507	0.702458	0.42873	0.578064	-0.346341	-0.362406	1.07056	0.821522	0.207693	1.8422	0.150297	-0.290019	-1.36835	1.10597	0.0787312	-1.42996	-1.10633
AJAP1	0.0478219	-0.584796	-0.112968	-0.625234	0.00227529	-0.0424807	0.697523	0.546033	-0.50291	0.0679606	-0.371444	-0.575412	0.157747	0.00711265	0.703317	-0.0971023	-0.142134	-0.617299	0.0503967	-0.204151	0.104813	-0.253213	0.0436214	0.0408113
AJM1	-0.352372	-0.350669	-0.327392	-0.250856	0.763714	0.432483	0.456071	0.372692	-0.253734	-0.246201	-0.172329	-0.206638	1.07528	0.238136	0.814476	0.390458	-0.0824283	-0.251332	-0.222483	-0.112881	0.91744	0.224624	0.458457	0.390223
AJUBA	-0.196202	-0.630773	0.730626	-0.686909	0.971824	0.180138	0.0681206	0.325022	-0.50101	-0.494351	-0.453382	-0.600909	0.151623	-0.307229	0.0650001	-0.149776	-0.166042	-0.618008	0.842408	-0.58854	0.0645125	-0.242099	-0.0666264	-0.138179
AK1	0.564876	0.735611	0.235236	0.515211	-0.384061	0.252234	1.36533	1.08193	-0.305041	-0.0320307	-0.671947	-0.170714	-1.12819	-0.201557	0.406518	0.117102	0.138873	0.591406	0.915067	0.499851	-0.661362	-0.40529	-0.41985	-0.763362
AK2	-0.0230369	0.059286	0.100251	0.124661	-0.268146	-0.26717	-0.602923	0.0863005	0.177297	-0.0281572	0.109369	0.18677	-0.49033	0.25991	-0.593108	-0.118384	0.0428219	-0.028997	0.344518	0.3526	-0.05916	0.361942	0.226773	0.500836
AK3	-0.198789	0.263643	0.108179	0.342571	-0.371907	-0.504556	-0.348032	-0.770761	-0.259794	0.289325	-0.0732421	0.209478	-0.56817	-0.449906	-0.69637	-0.996801	0.962995	1.44278	1.09994	1.29183	0.764406	0.638247	0.942145	0.401206
AK4	-0.125465	-0.223473	-0.869912	0.414685	0.692084	0.454414	-0.766392	-0.298212	-0.0911882	0.180767	0.418317	0.162143	0.65983	0.321034	0.00315532	0.549886	-1.00983	0.494189	-0.82556	-0.0735523	-0.667924	-0.0775411	-0.407003	-0.755526
AK5	-0.162328	-0.89607	-0.0253945	-0.290661	-0.191453	0.464598	0.28995	0.285695	-0.74455	-0.728874	0.904603	0.0877779	0.10115	0.565799	-0.0328226	0.0515993	-0.725274	0.012833	0.52825	0.054846	-0.0593342	0.332556	0.494653	0.449809
AK6	-0.10091	-0.0966198	-0.430812	0.186744	-0.0251581	-0.914941	-0.915177	0.180648	-0.0929539	-0.0401717	-0.687824	0.0447469	-0.195982	-1.08315	-1.23479	-0.13479	0.988069	0.693772	0.479331	1.29455	1.31276	0.510429	0.701996	1.31664
AK7	-0.388553	-0.23644	-0.136769	-0.30282	0.332072	0.375343	0.328308	0.344652	-0.0341524	-0.23119	-0.0906681	-0.136331	0.387551	0.0893469	0.39605	0.310381	-0.152428	-0.184228	0.132338	-0.0150768	0.380333	0.0593423	0.591933	0.260151
AK8	1.88232	2.7352	1.69064	1.43632	4.06791	2.30868	1.48809	2.09703	-1.94946	-0.0695489	-1.59429	-3.02963	1.02306	-0.0842178	-0.261157	-0.592073	1.37467	0.255146	0.103521	-1.87382	-0.532715	-1.13854	-1.91668	-1.72203
AK9	0.0821752	-0.036917	0.310904	0.548511	-0.82554	-0.543206	-0.498109	0.207228	0.292344	0.78337	0.908868	1.02333	-0.156263	0.372128	0.180022	0.755524	-1.06017	-1.22683	-0.195665	-0.0779524	-0.930006	-0.826902	-1.02013	-0.996615
AKAIN1	-0.255133	-0.256012	-0.217035	-0.268759	0.520766	0.341839	0.460596	0.308491	-0.118938	-0.100704	-0.0372966	-0.207769	0.658903	0.149158	0.504677	0.398567	0.0719511	-0.0973821	0.0560426	-0.0906181	0.660106	0.189397	0.398681	0.310344
AKAP1	0.207582	0.188413	0.0925842	0.594827	0.0210159	-0.624148	-0.432709	0.173053	0.0328547	0.109974	0.116693	0.360304	-0.225823	-0.629108	-0.491994	0.11091	0.227192	-0.109667	-0.534044	0.356254	-0.116395	-0.421286	-0.175067	0.0817777
AKAP10	0.297507	0.232263	0.535646	0.378861	-0.703739	-0.541869	-0.841998	-0.291777	0.503952	0.607813	0.906958	0.617794	0.0988834	0.444782	-0.300879	0.39882	-0.518133	-0.326746	0.209765	0.0391091	-0.986763	-0.845468	-1.59187	-0.756841
AKAP11	0.470957	0.534069	0.686857	0.46466	0.674435	0.442125	-0.345711	-0.328617	0.561663	0.239046	0.258898	0.198032	0.221814	0.291277	-0.168677	-0.428533	-1.01564	-0.406738	-0.984343	-0.810724	-0.890145	-1.18841	-1.079	-1.06881
AKAP12	-0.643898	-0.812773	-0.398038	-0.308241	-0.37713	0.255715	-0.294418	-0.629472	-1.07092	0.559595	-0.335015	-0.185917	-0.12277	0.804108	0.536321	0.858657	-0.347214	3.05995	1.95926	-0.0328028	-0.053074	1.8422	-0.171173	-0.402112
AKAP13	0.474911	0.601683	0.47738	0.866447	0.0869831	0.297766	-0.108977	0.14982	0.24371	0.440275	0.151234	0.522142	-0.383195	-0.189754	-0.207104	-0.246824	-1.00199	-0.180197	-0.0867599	-0.226051	-1.30128	-1.14088	-1.19964	-1.20516
AKAP14	-0.853007	-0.763709	0.290166	-0.200266	-0.00143909	0.0149293	0.194528	-0.239482	-0.685967	0.332329	-0.136727	-0.707058	0.153999	0.616441	0.0265264	-0.253578	-0.646425	-0.920291	-0.709594	-0.700744	0.461289	0.579411	0.363156	0.847264
AKAP17A	0.281501	-0.209562	0.111415	0.296283	-1.09013	-1.34118	-1.08091	0.57708	0.309007	0.146906	0.450929	0.341112	-0.89389	-1.39864	-0.56223	0.506054	0.689162	0.376692	0.870957	0.480875	-0.480344	-0.961652	-0.818972	-0.0815621
AKAP2	-0.0750731	0.307529	0.244793	0.219401	-0.522106	-1.29089	-0.814582	-0.538247	0.225105	0.573165	0.570526	0.331962	-0.482212	-0.890055	-0.909858	-0.106717	0.376396	0.307829	0.0906228	0.729551	-0.151213	-0.37605	-0.54636	-0.116937
AKAP3	-1.12217	-1.16306	-0.444015	1.70907	2.22954	-0.539341	-0.27465	-0.217691	-0.957832	0.0258059	0.131618	1.37418	0.614378	-0.638317	-0.220271	0.499578	-0.288225	-1.3449	1.22175	1.89852	0.00399239	-0.578049	-0.300374	-0.463984
AKAP4	-0.172846	-0.0639819	-0.359929	-0.0456618	0.432483	-0.277873	1.03486	0.454904	-0.449906	-0.896105	-0.422279	-0.583108	0.902094	0.681562	0.832205	-0.437446	-0.164686	0.22323	-1.10927	-0.480236	1.12202	0.690694	1.01815	0.626522
AKAP5	1.03863	1.06253	1.36952	0.61997	2.5521	1.01354	0.625887	1.00182	-1.12416	-1.20471	-1.06435	-1.30351	0.421348	-0.55274	-0.389524	-1.54487	-0.677679	0.429144	0.0362536	-0.507044	-0.309459	-0.670801	-0.0233449	0.508931
AKAP6	-0.996636	-0.524518	-0.940136	0.267143	-0.293939	0.367458	-0.135848	-0.436692	0.580677	0.712963	1.40785	1.59113	0.62786	0.599242	-0.0661157	-0.466183	-0.859176	-0.51333	-0.99618	0.194985	-0.135494	-0.492425	-0.194868	-0.341731
AKAP7	0.373262	0.135538	0.279746	0.453798	-1.26036	0.117045	-0.654986	-0.868124	1.58658	1.4762	1.4734	1.73439	0.632229	0.978126	0.196729	1.06243	-1.65736	-1.42331	-0.987138	-0.576211	-3.23349	-1.47287	-1.32429	-2.35651
AKAP8	0.217946	0.444492	0.392264	0.179001	0.00791624	-0.339279	-0.1352	-0.573165	0.247442	0.497324	0.372861	0.248235	-0.139267	-0.486908	-0.0263206	-0.497083	0.24644	0.161133	0.164595	0.0912907	-0.586025	-0.777842	-0.280515	-0.786156
AKAP8L	0.196387	0.170401	0.288953	0.129573	-0.563075	-0.348617	-0.123042	-0.0313345	0.398629	0.30696	0.426305	0.304386	-0.461987	-0.256097	-0.406968	-0.357282	0.415429	0.34824	0.350119	0.288354	-0.524553	-0.281954	-0.0536762	-0.357244
AKAP9	0.241702	0.368475	0.485972	0.448946	-0.55208	-0.483899	-0.547501	-1.05328	0.497702	0.589188	0.392263	0.513705	-0.432943	-0.269832	0.460594	-0.846689	0.140586	0.440376	0.528886	0.100116	-0.491394	-1.06276	-0.313074	-0.46381
AKIP1	-0.233162	-0.927067	-3.12046	-0.712794	-0.356299	-0.674658	-1.03626	0.386265	0.606697	0.00593922	-0.8239	0.248776	-0.00271948	0.0526792	-0.736496	0.857655	0.705653	0.234013	0.198138	0.838053	1.24979	0.892548	1.08488	1.50269
AKIRIN1	0.192017	0.0428164	0.202536	0.0619225	0.0078731	0.0990247	0.325433	0.21437	0.150284	-0.313344	-0.415879	-0.0155036	-0.351194	0.114908	-0.0825918	-0.246568	0.396483	0.0644499	0.0861749	0.225079	-0.203828	0.237266	0.681697	0.73965
AKIRIN2	0.189833	0.0696904	0.14342	0.0230991	-0.360831	-0.761034	-0.470558	-0.213396	0.353	0.191819	0.246088	0.194995	-0.437446	-0.239162	-0.471968	-0.186082	1.03646	0.955653	0.695573	0.711564	-0.129315	0.288748	0.073922	0.0906696
AKNA	0.734698	0.524025	0.266726	0.309081	-0.620618	-0.273717	0.0420291	-0.491027	0.314734	0.777001	0.563679	0.170646	-0.600224	0.599812	0.826372	-0.232733	-1.3626	-1.70616	-0.178761	-1.66741	-0.81649	-0.938053	-0.538644	-0.954011
AKNAD1	0.385298	-0.115565	-0.864422	-0.00336605	-0.206461	-0.0659463	0.0753507	0.443945	-0.768941	-0.647086	-0.622405	-0.69159	0.059472	-0.339069	0.0963541	-0.218685	-0.709032	0.0607726	-1.15743	0.294682	0.0416866	1.41166	-0.0179907	-0.108135
AKR1A1	0.0448546	0.284413	0.0676614	0.220679	-0.585615	-1.02187	-0.439424	-0.308432	0.0267588	0.178155	-0.0222834	0.229982	-0.25622	-1.16561	-0.745129	-0.198614	1.96474	1.97843	1.7205	1.82023	1.44278	1.2321	1.55391	1.52616
AKR1B1	-0.141477	-0.0624391	-0.0804255	0.319765	-0.691618	-0.97237	-0.282207	-0.348285	-0.0649857	-0.0296784	-0.105628	0.383602	-0.396445	-1.11719	-0.679021	-0.121894	1.03014	0.959173	0.673843	1.4395	0.895479	0.90077	1.1617	1.31004
AKR1B10	-0.528619	-0.596202	-0.674875	-0.0821185	0.27309	0.232211	0.092875	-0.153923	-0.604918	-0.604736	-0.296616	-0.649511	0.0909297	0.412173	0.113533	0.735432	-0.252868	-0.0147077	-0.646284	-0.700167	0.317999	0.246373	-0.0376097	-0.130752
AKR1B15	-0.723905	-0.122235	-0.678564	-0.715849	-0.190975	-0.163083	0.0557318	-0.184278	0.267435	-0.0990094	-0.362839	-0.712475	0.07237	0.261891	0.0665891	-0.259318	-0.48696	-0.72555	-0.750286	-0.826902	0.0204269	0.51026	-0.071938	-0.132108
AKR1C1	-0.545308	-0.570651	0.0862171	-0.446625	0.109189	0.675785	0.238544	0.144725	-0.452058	-0.442486	0.224027	-0.289028	0.250855	-0.0313412	0.695788	0.462838	-0.313422	-0.173997	-0.529304	-0.372636	0.814825	-0.0402012	0.161753	0.475668
AKR1C2	-0.37281	-0.368737	-0.339994	-0.233806	0.330801	0.443577	0.485669	1.26824	-0.279325	-0.267829	-0.177708	-0.198176	0.510775	0.241597	0.601008	0.418442	-0.105895	-0.2718	-0.260126	-0.105584	0.57977	0.235045	0.479763	0.4123
AKR1C3	-0.148593	-0.888618	-0.84229	-0.973733	-0.193875	-0.370961	-0.082924	-0.38275	0.333145	0.949233	-0.667607	-0.84829	-0.0364272	-0.50789	-0.0408652	3.12985	-0.755836	5.36944	4.82088	-0.963829	-0.0965388	-0.448101	-0.165641	-0.286708
AKR1C4	-0.393619	-0.403484	-0.341228	-0.400663	0.362923	0.201125	0.29889	0.173486	-0.285851	-0.277981	0.434905	-0.333461	0.420883	-0.0146425	0.354126	0.209002	-0.139382	-0.305912	-0.157222	-0.239656	0.404216	0.353244	0.23358	0.157
AKR1C6P	-0.273079	-0.28086	-0.202094	-0.327555	0.328308	0.311693	0.376597	0.256358	-0.164965	-0.131647	0.0224201	-0.276423	0.433653	0.096698	0.424653	0.301703	0.0703703	-0.125051	-0.0781231	-0.196201	0.454808	0.10137	0.318622	0.23183
AKR1C7P	-0.283087	-0.279478	-0.222519	-0.357464	0.302767	0.277123	0.366332	0.329287	-0.157369	-0.136683	0.0248369	-0.309179	1.00662	0.0937203	0.426244	0.232225	0.0546092	-0.12402	-0.0865828	-0.237614	0.440435	0.114033	0.320532	0.579288
AKR1C8P	-0.380097	-0.391215	-0.337311	-0.412471	0.66904	0.204724	0.285011	0.165907	-0.290273	-0.264422	0.122954	-0.358388	1.71158	-0.0274234	0.314857	0.199103	-0.109875	-0.28631	-0.185406	-0.291123	0.32564	0.00550245	0.210082	1.3994
AKR1D1	-0.469296	-0.432709	0.0318322	-0.390552	0.205571	0.242138	0.333126	0.206091	-0.329225	-0.345821	-0.217194	-0.360162	0.38135	0.00568402	0.403171	0.996918	-0.186629	-0.361992	-0.258892	-0.316101	0.445448	0.0375597	0.289623	0.211752
AKR1E2	-0.168472	-0.323311	-0.617319	-0.673503	0.744493	-0.0369638	0.278216	0.645823	-0.522715	-0.526029	-0.411449	0.244281	0.119949	-0.258236	0.0811216	-0.165244	-0.0878546	1.31378	-0.623941	-0.612855	0.284994	-0.227106	0.239199	-0.119623
AKR7A2	0.0987543	-0.036819	0.251655	0.122004	0.148037	-0.352712	-0.373889	-0.596331	0.116693	-0.111012	0.112575	0.225962	0.0873757	-0.650173	-0.596171	-0.606207	0.498413	0.418974	0.312801	0.703496	0.255599	-0.0831332	-0.291303	-0.226305
AKR7A2P1	-0.00760803	0.169142	0.330119	0.236369	1.06858	-0.536854	-0.635913	-0.452089	0.262514	-0.229106	0.199952	0.105424	1.02699	-0.900492	-1.76856	-0.216076	0.457211	0.41667	0.23275	0.723638	1.23398	-0.134864	-0.273979	-0.75933
AKR7A3	0.247114	0.198812	0.320505	0.21629	-0.410176	-0.619778	-0.503364	-0.659955	0.237162	-0.0255063	0.194837	0.259772	-0.334236	-0.741885	-0.774415	-0.643261	0.624774	0.53997	0.477821	0.745637	-0.167651	-0.0705006	-0.279424	-0.369934
AKR7L	0.482364	0.417219	0.79215	0.207508	-0.365344	0.00874497	-0.345072	-0.657839	0.15754	0.401886	0.512832	0.221941	-1.42161	-0.199977	-0.186484	-0.867846	0.33269	0.486507	0.614475	0.394374	-0.561267	-0.582545	-0.394694	-1.12758
AKT1	0.0160385	0.145398	0.0467283	-0.0438666	0.0136527	-0.766561	-0.233437	-0.032782	0.0265264	0.11091	-0.00155608	-0.0369591	-0.218724	-0.393431	-0.46607	-0.36573	0.380172	0.366365	0.424376	0.367815	0.0296962	0.232924	-0.242295	-0.205394
AKT1S1	-0.164312	0.017642	0.274079	-0.0635553	-0.376968	-0.54139	-0.0741082	-0.444357	-0.253054	0.563448	-0.256124	0.346857	-0.483704	0.0520798	-0.208721	-0.566483	-0.205849	0.929405	-0.0410826	-0.108059	-0.111826	0.34715	-0.181007	-0.401684
AKT2	0.216935	0.384266	0.222696	0.109769	-0.954044	-0.607648	0.269864	-0.322668	0.511074	0.598593	0.534367	0.506054	-0.143662	0.134999	0.781213	0.513993	-1.01086	-0.891529	-0.0303185	-0.386232	-1.13642	-1.12224	-0.813451	-0.986763
AKT3	0.915008	0.567786	1.08553	0.986733	-0.358679	0.20879	-1.76851	-0.979765	0.575762	0.250798	0.355368	0.687668	0.651108	0.50063	-0.483888	-0.115689	-1.40248	-2.05584	-0.856902	-1.0304	-2.23677	-1.96059	-4.14305	-2.65235
AKTIP	0.212749	-0.180212	-0.0915273	0.107181	0.307647	-0.454765	-1.48762	-0.451002	0.394909	-0.0215427	-0.0371467	0.423354	0.110348	-0.438029	-1.66417	-0.324802	0.789108	0.873493	0.495987	0.952527	0.231221	-0.205697	-0.485997	0.360053
ALAD	0.796308	0.547548	0.66082	0.640741	-0.16619	-0.0228596	-0.763709	0.527007	0.734214	0.245969	0.617945	0.772104	-0.338211	-0.503055	-0.778823	0.506339	0.197376	0.246283	0.187565	0.178478	-0.898583	-0.623941	-0.688645	-0.507318
ALAS1	-0.0634343	-0.424597	-0.793904	0.29889	0.435459	-0.395119	-0.532951	0.178211	-0.399261	-1.34972	-1.12456	-0.0528238	-0.251376	-0.939578	-1.95937	-0.477005	1.46497	1.02886	0.867185	1.48659	1.54661	0.982984	0.926098	1.16631
ALAS2	-0.559844	-0.624889	-2.01279	-1.45897	-1.3329	0.561008	-0.0995836	-0.818022	-2.42015	-0.870167	0.101857	-2.23335	-0.379523	0.909809	-1.53936	0.129653	0.958469	1.19751	0.415429	1.07785	0.403423	0.829081	0.800781	0.898478
ALB	-0.359514	-1.37661	-0.00951095	-0.134473	-0.659676	2.6864	-0.347903	-0.501727	1.1503	-0.86013	0.359047	0.00287666	0.826636	0.467519	-0.306206	-0.129597	0.200868	1.38404	-1.05375	0.395957	-0.336169	1.49292	1.29612	1.34234
ALCAM	0.172312	0.231084	0.545513	0.312602	-0.36042	-0.513198	-0.000287276	-0.586178	-0.218583	0.336991	0.189966	0.267291	-0.227921	-0.09529	-0.466333	-0.917814	0.22323	0.270043	0.223796	0.551561	-0.44762	-0.349518	0.0635531	-0.234949
ALDH16A1	-0.0229892	0.0152134	-0.068352	0.0797352	-0.11254	-0.511207	-0.186711	-0.29361	0.14981	0.0998539	0.130573	0.214138	-0.215996	-0.149494	-0.389913	-0.526218	0.814825	0.796613	0.888662	0.691469	0.729726	0.617741	0.574465	0.176081
ALDH18A1	0.226172	0.22681	0.165642	0.396879	-0.342138	-0.213805	-0.543755	0.10908	0.0347117	0.0228659	-0.229558	0.0999652	-0.620334	-0.74904	-0.852551	-0.347996	1.67907	1.50861	1.49292	1.95223	1.43143	1.22528	1.23028	1.66936
ALDH1A1	-1.18848	-0.444015	-0.30409	-0.947764	-0.508318	-0.13761	0.231158	-0.399357	-0.199115	0.144096	-0.790162	0.0425522	-0.212073	1.68904	1.07933	3.04217	-1.01531	0.46049	1.3123	-0.665104	-0.186872	0.253363	0.0735156	0.259256
ALDH1A2	0.29392	-0.566084	-0.525535	-0.516137	0.60063	0.0633995	0.215966	0.0876319	-0.437248	-0.20666	-0.36599	-0.448771	0.249895	-0.176983	0.291528	0.0373073	-0.340966	-0.537393	-0.27215	-0.422244	0.208512	-0.136661	0.16002	0.0403346
ALDH1A3	-0.305242	-0.325222	-0.244127	-0.401655	0.154574	0.243164	0.301742	0.191854	-0.208822	-0.174677	0.0307703	-0.374176	0.308313	0.743309	3.17573	0.153296	0.0299404	-0.162643	-0.156408	-0.334569	0.304409	-0.00237946	0.234065	0.151788
ALDH1B1	-0.228514	-0.0508783	-0.152071	0.0575741	-0.0643577	0.199825	-0.410213	-0.726019	-1.03529	-1.24319	-1.2506	-0.659115	-0.069946	-0.0127932	-0.56024	-0.713932	1.259	1.31062	0.732005	1.58148	1.73359	1.03605	1.29568	1.61014
ALDH1L1	-0.76685	-0.53408	0.212749	-0.473378	-0.0802871	0.0657035	0.236758	-0.31362	-0.657925	-0.653102	-0.466966	-0.743153	0.0234504	-0.401265	-0.0295997	-0.307494	0.62101	-0.879541	1.69654	0.564661	-0.0420948	-0.355795	-0.0184535	-0.229293
ALDH1L2	0.195868	-0.288733	0.314991	-1.76476	-1.40539	-1.68279	-1.04507	-1.07297	-0.372591	0.247442	-1.82123	-0.523983	-1.10383	0.574524	-0.154859	-0.983919	4.3211	3.37883	3.49771	4.23094	3.9372	4.06546	4.75485	3.96314
ALDH2	0.594325	0.239881	0.591501	0.846051	-0.605467	-0.0321088	-0.012094	0.0931188	0.478245	-0.0502305	0.275061	0.615397	-0.0949114	-0.298785	-0.312807	-0.133827	-2.72773	-0.5203	-0.119715	-1.18583	-3.08699	-2.33105	-1.51726	-2.49352
ALDH3A1	-0.227306	-0.301144	-0.316564	-1.40236	0.619557	0.339363	0.277586	0.0287524	0.329684	-0.298926	-0.678375	-0.663205	0.235671	0.172505	-0.243093	-0.133337	0.0910018	2.90021	0.671719	-0.117302	-0.14298	0.384059	1.14631	-0.207022
ALDH3A2	0.569516	0.0225088	-0.180904	0.248599	-0.591014	0.266441	-1.35693	0.0630551	0.469448	-0.153369	-0.911806	0.175196	-0.195606	0.287873	-3.02963	-0.563838	1.33831	0.945851	0.0688535	1.0601	0.406112	0.489443	-0.168501	0.599044
ALDH3B1	0.206815	0.0473804	-0.0793856	-0.162777	-0.678477	0.215704	-0.362148	0.326024	-1.02663	-0.651182	-0.257749	-0.162473	-0.406767	0.625537	0.506054	1.19255	0.316726	0.498413	0.614319	-0.0555677	-0.0426458	0.850307	0.392589	0.182511
ALDH3B2	0.343029	1.60739	-0.0810984	0.304641	1.26351	-0.751938	-0.421807	0.557876	1.49036	0.295639	-0.750122	0.545745	-0.403346	1.15536	-0.360104	0.720763	-0.931682	-0.0553759	-1.7652	-0.0308636	-0.363356	1.28145	-0.184009	-0.62364
ALDH4A1	-0.0885237	-0.180035	-0.295516	-0.705036	-0.884966	-0.269751	0.255715	-0.664906	-0.906863	-0.0616253	-0.392116	-1.35385	-0.781845	-0.252349	-0.304456	-0.0550402	2.14743	1.60482	1.49431	1.61813	2.05376	1.93116	2.57437	1.95223
ALDH5A1	0.290847	0.154716	0.28742	0.653334	0.155061	0.102799	-0.577133	0.0859064	0.00248552	0.0134297	-0.315662	0.31629	0.170945	-0.19234	-0.816278	-0.1938	0.184035	0.262119	0.428228	0.57639	-0.167143	-0.887007	-0.892102	-0.534821
ALDH6A1	0.0538831	-0.21805	-0.164074	-0.0402179	-0.282594	-0.489964	-0.392458	-0.480882	0.30347	0.0300443	0.0247229	0.179918	-0.106779	-0.0722096	-0.477602	-0.152084	0.858534	0.689436	0.663917	1.1327	0.589044	-0.00250923	-0.0787034	0.304267
ALDH7A1	-0.71149	-0.00927886	-0.386587	-0.0527832	-0.50493	-0.293423	-0.445291	-0.141162	-0.422169	0.0800175	0.115505	-0.163745	0.174964	-0.386882	-0.526755	-0.460424	0.17106	0.217346	0.105382	-0.0422951	0.0282034	0.430133	0.367686	0.674746
ALDH8A1	-0.570573	-0.114558	-0.517247	-0.761034	0.616958	-1.71277	-1.10473	0.525248	0.177403	0.499146	0.208139	-0.277703	-1.36684	0.313988	-1.16867	-1.53076	2.26639	1.82967	0.265521	2.21916	1.92381	1.18226	0.281043	2.13527
ALDH9A1	0.019811	0.258173	-0.198323	0.291558	0.139149	-0.566517	-0.821974	-0.529888	0.190213	0.201632	-0.366192	0.636737	-0.0380292	-0.444657	-0.882438	-0.548108	0.716014	0.887162	0.218225	0.671873	0.347257	0.303934	-0.269137	-0.282783
ALDOA	0.00738997	0.044732	0.247058	0.0489263	-0.227553	-0.286268	0.129256	-0.311861	-0.298827	-0.35746	-0.325899	-0.0856867	-0.301406	-0.484602	-0.470237	-0.567629	1.25294	0.9634	0.844532	1.0781	1.19018	1.09314	1.53173	1.31917
ALDOAP2	-0.606574	-0.606192	0.32158	-0.575169	0.26592	0.136102	1.1639	0.0168439	-0.17525	-0.48191	-0.385236	-0.490003	1.00138	-0.262676	0.203192	0.0253459	-0.381036	-0.161671	-0.511614	-0.492184	0.158198	-0.0632371	0.0706554	-0.0371415
ALDOB	-0.781371	0.123214	-0.472453	-0.850986	-0.335579	0.346372	0.345727	0.508221	-0.24991	-0.666427	-0.304122	-0.128633	-0.0352086	0.808289	0.0160351	0.158487	0.216468	0.606899	-0.0955679	-0.191218	0.140029	0.975162	1.00688	-0.205697
ALDOC	0.101052	0.114097	0.0342389	0.272019	0.200739	-0.157103	0.30767	0.0294351	0.249726	0.216925	0.184582	0.423056	0.631904	0.365734	-0.0510725	0.0337724	-1.19381	-0.595404	0.113498	-1.45513	-1.08759	-1.2265	-0.652735	-1.2363
ALG1	0.100061	-1.1308	-0.298491	0.230753	0.487239	-0.473162	-0.58388	-0.600085	-0.267982	-1.03174	-0.428157	0.203851	-0.0399798	-0.570745	-0.799554	-0.567695	1.18474	0.223124	0.875588	1.35788	1.42015	0.763268	1.30916	0.839798
ALG10B	-0.0240121	0.0917063	0.00676167	0.154968	0.285905	-0.739832	-0.778601	-0.696383	0.333763	0.500216	0.265071	0.539987	0.150814	-0.0239196	-0.593575	0.175011	0.401734	0.107387	0.0601384	0.462556	0.735296	0.272321	-0.0501065	0.408563
ALG11	0.370879	-0.0357999	0.174192	0.0998017	-0.890156	0.226392	-0.732008	-1.31514	0.61498	0.2685	0.192314	0.458253	-1.09694	-0.14907	-0.578894	-1.10383	0.995822	0.451244	0.567331	0.760405	-0.380199	0.637431	-0.217851	-0.367152
ALG12	0.182022	0.265736	0.0968807	-0.215528	-0.74225	-0.780462	-0.572331	-0.768362	0.451456	0.328041	0.28656	0.169808	-0.378614	-0.210566	-0.42967	-0.36044	0.964848	0.746074	0.639775	0.742257	0.354983	0.524675	0.135992	0.172354
ALG13	0.0875327	0.330614	0.182931	0.22314	-0.414755	-0.508397	-0.382585	-0.515108	0.267612	0.538173	0.298943	0.210484	-0.318985	-0.271116	0.10991	-0.309562	-0.752831	-0.0235697	-0.171623	0.0242642	-0.673442	-0.731719	-0.844167	-0.588881
ALG14	0.213681	-0.265448	0.0569527	0.0691427	0.370576	-0.0750731	-0.582869	-0.273242	-0.0419771	-0.214599	0.131037	0.125937	-0.618614	-0.670158	-0.894301	0.0406158	3.16821	2.51824	2.352	3.23357	3.08377	2.55012	2.8821	2.48874
ALG1L13P	-0.211976	-0.751009	-0.730599	-0.705194	-0.01031	-0.0791313	0.0639635	-0.136386	-0.331106	0.336357	-0.566851	0.669313	0.387039	-0.314161	0.807079	-0.147865	-0.61352	-0.837421	-0.290639	-0.62364	0.0475253	-0.24405	-0.0500284	-0.108468
ALG1L2	0.127173	-0.201183	-0.0702724	0.0966519	-0.553332	-0.406481	-0.241764	-0.119007	0.11685	-0.0855891	0.0382951	0.150377	-0.379043	-0.671729	-0.670382	0.179972	1.85072	1.68026	1.53335	1.84402	1.65672	1.46383	1.78747	1.66758
ALG1L9P	0.22877	-0.0231637	-0.0131421	0.141297	-0.332659	-0.705764	-0.464634	-0.244711	0.233241	0.0496761	0.128435	0.0257517	-0.286738	-0.836894	-0.881945	0.158871	1.81361	1.75389	1.62437	2.01995	1.95669	1.36087	1.87478	1.69235
ALG2	0.029667	-0.0571489	0.0819308	0.353406	0.0694379	-0.539051	-0.406845	-0.321254	-0.012998	-0.103488	-0.647331	-0.0411846	-0.479034	-0.586815	-0.0354785	-0.502636	1.48045	1.70486	1.72517	2.29705	1.99124	1.0107	0.862911	1.13169
ALG3	0.0711198	-0.1189	-0.112045	0.0274807	-0.270935	0.304424	-0.0429511	-0.361326	0.00255361	-0.303661	-0.290886	-0.0111957	-0.604996	0.0782491	-0.467825	-0.189406	1.30137	0.898478	0.547518	1.15136	1.50269	1.54457	1.95826	1.40014
ALG5	0.0924802	0.151224	0.169186	0.136769	-0.31871	-0.377729	-0.453984	-0.268825	0.162757	0.198929	0.342021	0.260049	-0.459226	-0.563548	-0.522919	-0.072754	2.76098	2.46577	2.23694	2.85661	2.49108	2.31223	2.75436	2.47325
ALG6	-0.00902477	-0.13172	-0.0316425	0.218205	-0.286307	-0.302394	-0.573356	-0.273792	0.0466799	-0.00326242	-0.011471	0.351861	-0.323858	-0.335246	-0.527456	-0.126647	0.775791	0.409116	0.557038	0.705653	0.533836	0.373929	0.719658	0.787196
ALG8	0.165317	-0.0234157	0.236774	0.15863	-0.508148	-0.0432799	-0.588305	-0.668536	0.201519	0.130537	0.192807	0.174814	-0.629879	-0.0516425	-0.780693	-0.351929	1.22765	0.82447	0.861258	1.51635	0.883703	0.962057	1.26615	1.15432
ALG9	0.0359283	1.5073	0.369942	0.182809	-0.936072	-0.305632	-1.1808	-0.814064	0.140979	0.349263	0.434707	0.185287	-0.323517	-0.0671987	-0.6229	-0.0683581	0.118815	0.767505	0.225695	0.572325	-0.511517	0.15323	0.497262	-0.105584
ALK	-0.319756	-0.333968	-0.304911	-0.273682	0.338079	0.403813	0.411387	0.338672	-0.212563	-0.212945	-0.153036	-0.231311	0.494768	0.22557	0.504175	0.340554	-0.0344205	-0.217598	-0.17051	-0.134784	0.535741	0.185991	0.400225	0.339319
ALKAL1	-0.635639	0.496099	-0.605059	-0.597558	0.143829	-0.024617	0.154441	-0.0236932	-0.524172	-0.510134	-0.454585	-0.502554	0.207252	-0.290499	0.185563	-0.0208396	-0.440855	0.120082	0.294343	0.0314605	0.14985	-0.175691	0.812227	-0.060408
ALKAL2	2.12258	4.35291	3.47327	2.63333	0.424872	0.0125353	0.687592	-1.04214	0.705921	0.29804	1.73294	0.789305	-0.99827	-1.71402	2.38135	-1.65476	-2.06295	-0.373439	0.00651597	-1.69889	-0.811339	-1.28144	-0.864211	-1.13939
ALKBH1	0.160405	-0.176224	-0.141127	0.224305	0.270232	-0.272144	-0.341259	-0.595044	0.16128	0.027726	0.241828	0.217791	0.253042	-0.189167	-0.773318	0.2532	0.131317	-0.0119314	-0.133807	0.490664	0.483054	0.337696	0.00230536	0.273374
ALKBH2	0.21457	0.110983	-0.102609	0.150201	-0.335835	0.245248	-0.590525	-0.704415	0.226115	0.248908	0.119527	0.379019	-0.229339	0.0551815	-0.631163	-0.839455	0.43326	0.0785412	-0.108794	0.34156	-0.171623	0.364912	-0.16001	-0.076362
ALKBH3	0.0502695	-0.0677332	0.181806	0.191785	0.110816	-0.578922	-0.555081	0.173897	-0.0557208	-0.0421691	0.177077	0.0149467	-0.180884	-0.696518	-0.761412	-0.250019	0.98885	0.913576	0.936934	0.902281	0.741122	0.650356	0.588452	0.848033
ALKBH3-AS1	-0.138344	-0.466342	-0.440316	-0.0139741	0.210208	0.357979	1.12111	1.42851	-0.374176	-0.378497	-0.247789	-0.0643741	1.19794	0.175961	1.16189	1.51561	-0.242042	0.102699	-0.185365	-0.197147	0.473102	0.126034	0.490757	0.896879
ALKBH4	-0.0772781	-0.435351	-0.505324	-0.0603741	-0.440468	0.184704	-0.329542	-0.788883	0.187381	-0.00228984	-0.131513	0.442127	-0.18657	0.460363	-0.620334	-0.338362	0.644434	0.336788	0.146089	0.73578	0.00264698	0.735688	0.747694	0.683585
ALKBH5	0.297402	0.290655	0.102961	0.0406585	-0.953478	-0.917637	-0.616522	-0.52951	0.328396	0.342021	0.11791	0.192072	-0.509108	-0.49684	-0.421312	-0.159781	0.916599	0.970829	0.726002	0.973747	-0.176402	0.213192	-0.109551	0.454347
ALKBH6	0.350272	0.28044	0.101281	0.231355	-0.491386	-0.329846	-0.176693	-0.0702724	0.197799	0.292757	0.16817	0.261586	-0.260776	-0.574149	-0.495286	-0.454352	0.252432	0.347257	0.0623294	0.398496	-0.470134	0.227059	-0.364716	-0.32745
ALKBH7	0.113915	0.239056	0.266924	0.217765	-0.547418	-0.261112	-0.231855	-1.10979	-0.226846	-0.30552	-0.602179	-0.0182697	-0.562941	-0.578806	-0.617142	-1.72254	0.760264	0.850544	0.632235	0.911915	-0.188282	0.593078	0.291678	0.051862
ALKBH8	0.354066	0.0756067	-0.374949	0.000105514	-0.42682	1.38915	-0.28065	-0.411201	0.0337222	0.360067	-0.68149	0.0457068	-0.091557	0.602454	-0.18817	-0.456785	0.46118	0.493932	-0.419706	-0.0024396	-0.114098	-0.970815	-0.236493	-0.231808
ALLC	-0.324909	-0.306808	-0.142195	-0.202465	0.537776	0.323612	0.374274	0.396398	-0.182702	-0.111476	-0.0676795	-0.263407	0.430371	0.17162	0.488377	0.282966	0.138636	-0.199662	-0.144914	-0.152961	0.710224	0.126542	0.463335	0.328347
ALMS1	0.231917	0.0376392	0.441258	0.0754173	-0.742068	-0.993545	-0.761135	-1.72506	0.525373	0.387621	0.639919	0.294069	-0.88748	-0.232691	-0.368766	-0.510752	0.586594	0.140758	0.22631	0.184685	-0.0970495	-0.470069	-0.120957	0.212554
ALMS1P1	0.332344	0.731686	0.201861	0.387773	0.894666	-0.378616	-0.776607	-1.27328	0.364641	0.212085	0.0969611	0.8167	0.771212	-1.52388	-0.691113	-1.49787	0.57491	-1.06346	-1.57788	0.437964	1.34898	-1.17096	-0.752196	-0.209105
ALOX12	-0.460998	-0.484515	-0.416923	-0.553933	-0.0140891	0.110866	1.7499	0.0422856	-0.36187	-0.32814	-0.203659	-0.534269	0.178099	-0.141121	1.09017	-0.0926203	-0.176466	-0.379465	0.700041	-0.57706	0.144633	-0.167352	0.0872125	0.0125184
ALOX12-AS1	0.0633212	-0.223496	0.226237	0.274905	0.391942	0.363436	-0.335405	0.504839	0.381592	0.0617785	0.389533	0.532105	-0.00911807	0.241982	-0.570266	0.481017	-0.187294	-0.0915497	0.114256	0.134157	-0.77544	-0.614544	-0.843273	-0.879047
ALOX12B	0.949659	0.0995984	0.503169	0.443681	-1.36683	-0.712233	-0.5046	-0.746011	0.583164	0.559026	0.139447	0.258035	0.712372	0.388707	-0.00830903	-1.54856	-0.18585	0.344746	-0.605629	0.136237	-1.0544	0.364399	-0.329985	-0.638805
ALOX12P2	-0.469661	-0.480934	-0.123497	-0.294252	-0.0750033	-0.0448556	0.0195482	-0.349883	-0.344556	-0.659263	-0.345592	-0.39975	-0.143133	0.010538	-0.0160889	0.147274	0.542578	1.00731	0.474784	0.0424557	0.495987	0.396483	1.17111	0.68868
ALOX15	0.0990019	0.111043	0.176783	0.189413	-0.328578	-0.314901	-0.0173149	0.418431	0.160441	0.251863	0.282498	0.10448	-0.528353	0.354773	-0.102329	0.1238	-0.547095	-0.0567399	-0.288276	-0.0970708	-0.911418	-0.544171	-0.64593	-0.355426
ALOX15B	0.0761685	0.109996	0.0199551	-0.0785532	0.430285	0.623215	0.928454	-0.982864	0.268696	0.105365	-0.694315	0.25577	-0.187314	1.30327	0.475907	-0.486032	-0.0319181	0.423673	0.370226	-0.0592251	-0.313509	0.499002	0.504557	-0.390315
ALOX5	0.487372	-0.102609	0.762422	0.272814	-0.243921	0.0366033	-0.337288	-0.0355676	0.318009	0.257074	-0.166276	-0.140675	-0.0975484	0.445084	-0.191224	-0.305623	-2.26379	-2.39507	-1.21855	-2.3034	-2.22009	-2.54406	-2.38642	-2.1103
ALOX5AP	0.0410028	-0.219659	0.173897	0.104828	-0.231079	0.484418	0.583093	0.332072	0.738197	0.437739	0.687555	0.720273	1.48401	0.927959	0.940158	1.07885	-2.89626	-1.73621	0.0907006	-1.81578	-2.46486	-2.37538	-0.696616	-1.86043
ALOXE3	-0.438057	-1.22056	-1.94286	-1.90607	-1.10438	0.00034283	-0.17386	-0.690175	-1.84068	-1.75003	-1.45232	-1.71599	-0.498301	0.33281	-0.631527	0.222263	1.03774	0.956171	1.21367	1.40342	1.7621	2.57317	1.17325	1.50428
ALPG	-0.0686578	0.20889	0.00885661	-0.0780068	0.51427	-0.515699	0.265656	-0.632391	-0.245009	0.199707	-0.212108	0.0163903	0.481599	0.425558	0.524505	-0.188131	0.228217	0.239782	0.502632	0.462774	1.48521	0.939829	0.664222	0.51415
ALPI	-0.369871	-0.584959	-1.18332	-2.03414	-0.218198	0.71218	-0.984596	0.744188	-1.11042	-0.149193	-0.593022	-1.9799	-1.19368	-0.556955	-0.318167	0.570543	1.47227	2.14635	1.33309	1.5438	1.78388	1.65495	-0.243297	1.27086
ALPK1	0.584312	0.436675	0.414119	0.8287	0.00716067	-0.0300106	-0.52358	0.014082	0.3412	0.484652	0.52302	0.674143	-0.161691	0.35998	-0.154403	0.0988834	-1.05023	-1.18484	-1.05338	-1.09869	-1.31217	-1.41842	-1.74029	-1.38295
ALPK2	-0.439814	-0.401609	-0.38976	-0.232723	0.247614	0.84393	0.548096	0.61223	-0.307494	-0.321441	-0.169313	-0.217106	0.520966	0.236041	0.681939	0.385948	-0.157776	-0.329855	-0.136545	-0.161792	1.37738	0.205086	0.554127	0.41946
ALPK3	-1.06544	-0.0851329	-0.913199	0.126818	0.0806507	-1.24233	-0.800303	-1.16922	1.02736	0.702293	0.834963	0.363209	-0.245209	-0.212409	-0.730277	-0.265565	0.618562	0.316912	0.424793	0.917964	-0.717051	-0.0504979	-0.781574	0.949922
ALPL	2.21558	1.51528	1.70458	1.60508	-1.25995	0.373335	-0.932308	-0.676373	0.109557	-0.407624	0.480103	0.158246	-1.13083	0.410686	0.781032	0.641656	0.35882	0.410592	0.781759	-2.22944	-0.896094	-0.402368	-0.917038	-0.825829
ALPP	0.109996	0.01681	0.00384284	-0.16619	0.450232	-0.0652081	0.169749	-0.32209	0.344513	-0.137592	-0.204675	0.174242	-0.0922123	0.590776	0.191347	-0.344198	0.139201	0.233946	0.347538	0.223939	0.194561	0.806791	0.59839	0.335672
ALS2	-0.0631108	0.550502	0.151739	0.162079	-0.66872	-0.801243	-0.472453	-0.527654	0.115898	0.701653	0.119646	0.182938	-0.531907	-0.565373	-0.173714	-0.282488	0.822451	1.23818	1.06177	1.01539	0.11312	-0.270772	-0.21701	-0.178416
ALS2CL	-0.398461	0.0290131	0.198345	-0.362952	-0.305349	-0.255904	-0.520627	-0.404675	0.256877	0.291071	0.185425	0.388565	0.90153	0.68586	-0.317095	0.503081	-0.475927	0.786571	0.446467	-0.299002	-0.450396	-0.193426	-0.40204	0.33069
ALX1	-1.02541	-1.03864	0.904398	0.154441	-0.347383	0.213464	-0.0423999	-0.28757	0.559507	-0.851065	-0.741821	-0.405363	1.41323	0.295639	0.686254	-0.359276	0.221296	0.187633	0.303626	-0.957099	-0.0835261	0.637315	-0.126967	0.212879
ALX3	-0.482651	-1.78083	-0.959953	0.213378	-0.458125	1.73385	1.00404	-0.373889	-1.49787	-0.224941	0.590167	-0.905822	-0.660183	0.863107	0.986604	1.10466	-0.583698	0.886778	0.212385	0.401512	-0.262181	1.05939	0.440561	0.849559
ALX4	-1.0375	-1.14068	-1.62743	-1.33521	-0.149759	0.837096	0.235137	0.256876	-1.2329	-1.45421	-1.11361	-0.745129	0.258196	0.267435	-0.119729	-0.643856	0.444669	1.12035	-1.04022	0.391695	0.945851	1.35693	0.722638	0.594957
ALYREF	-0.141728	-0.0285914	-0.100815	-0.48123	0.0100756	-0.397554	-0.152258	-0.232884	-0.128758	-0.311279	-0.339751	-0.36484	-0.360729	-0.683124	-0.262947	-0.43642	1.34876	0.847675	0.560305	1.12347	1.82023	1.22645	1.75635	1.82585
AMACR	0.228505	0.0274191	-0.183296	0.171276	0.488683	-0.426928	-0.746656	-0.0303662	0.176035	0.197582	-0.522919	0.869402	0.744426	-0.16075	-0.541504	0.29673	0.283808	0.504867	0.0860199	0.589239	0.202046	-0.547095	-0.265291	-0.223667
AMBN	-0.52773	-0.538417	0.0409809	-0.472276	0.0724573	0.825055	0.918716	0.137316	-0.398714	-0.426693	-0.295891	-0.435592	0.261542	1.4446	0.331429	0.0749203	-0.283501	-0.496699	-0.265329	-0.429545	0.912193	1.38995	0.199682	0.0952214
AMBP	-0.521817	-0.548503	-0.470204	-0.638186	-0.00729422	0.00134953	0.0987543	-0.0722666	-0.433951	-0.412064	-0.312433	-0.562078	0.117782	-0.235353	0.096698	-0.0990974	0.725805	-0.486572	-0.41829	-0.144299	0.0442407	0.171848	-0.0235697	-0.114678
AMBRA1	0.26444	0.580287	0.255064	0.1806	-0.651963	-0.473331	-0.288294	-0.680937	0.364129	0.62656	0.254891	0.220338	-0.646359	-0.0930992	-0.095694	-0.217583	0.394822	0.175513	-0.00705294	0.139416	-0.781574	-0.382331	-0.446087	-0.433099
AMD1	0.12593	-0.0180034	0.20325	-0.177394	-0.693622	-0.704043	-0.708939	-0.485229	0.527985	0.531208	0.598298	0.230098	-0.504773	-0.270611	0.261631	0.141313	0.503569	0.100712	0.179697	0.396819	-0.22894	-0.379345	0.0217031	0.281234
AMDHD1	0.258587	-0.236638	-0.120364	0.552967	0.79337	0.630041	-0.548503	0.29296	0.312401	-1.21511	-0.913669	-0.0822314	-0.0666127	-0.143416	-1.51619	-0.622405	0.505834	-0.0522438	-1.0382	0.806982	-0.128709	-0.292514	-0.230748	-0.288952
AMDHD2	0.287989	0.29405	0.380318	0.185781	-0.383709	-0.151546	-0.222519	0.290847	0.121147	0.00583596	-0.131846	0.131247	-0.543422	-0.184791	0.173267	0.112247	0.113723	0.00468655	-0.0137197	0.0556252	-0.809861	-0.333269	-0.392555	-0.261596
AMELX	-0.597558	-0.596123	-0.544411	-0.66143	0.0313933	-0.06302	0.120697	-0.03838	0.393147	-0.484495	-0.379083	-0.259669	0.164162	0.649588	0.20608	-0.112724	-0.388058	-0.582206	-0.380354	-0.602824	0.0822201	-0.272474	0.0505448	0.662387
AMELY	-0.484752	-0.515012	-0.463137	-0.536233	0.11827	1.12204	0.20673	0.0571656	-0.395949	-0.37079	-0.284577	-0.475782	0.215074	-0.206704	0.227153	0.0513911	0.153267	-0.444459	0.841315	-0.476427	0.436745	-0.110831	0.677932	0.574582
AMER1	0.242792	-0.227363	0.673118	0.0248926	-0.117878	0.106684	-0.0357999	-0.621835	0.616027	0.1792	0.105496	0.658471	0.514488	0.604539	0.295077	-0.531377	-0.575285	0.220749	-0.402689	0.0922089	-0.251891	-0.52124	-0.134864	-0.375384
AMER2	-0.613393	-1.54105	0.333126	-1.38315	-0.64055	0.589029	-0.188199	-0.718443	-1.30351	-1.25773	-1.0924	0.298358	1.54596	-0.858329	-0.273414	0.929867	0.26907	0.679295	0.0667395	0.802952	-0.360527	0.837136	0.633312	0.0674985
AMER3	-0.960609	-1.01221	-0.913005	-0.151705	0.159891	-0.169993	0.783238	-0.205745	-0.842076	-0.79542	-0.0511525	-0.393251	0.0155918	1.12188	0.0251711	-0.288305	-0.798689	0.695573	-0.123672	-0.83905	-0.0172948	1.23028	-0.0938614	-0.163361
AMFR	0.835203	0.680388	0.634743	0.249967	-0.14936	0.206477	0.320171	0.165389	0.618314	0.548124	0.439808	-0.0769438	-0.526624	-0.121642	0.00921067	-0.335817	0.127478	0.0443654	0.279851	-0.526521	-1.1735	-0.991128	-0.832726	-0.92232
AMH	0.932486	0.352153	-0.981733	0.668893	-0.647315	-0.793395	-0.265549	0.875564	-0.472737	0.071488	0.222131	-0.762336	-0.629347	-0.636243	-1.15652	-0.468098	1.13974	0.229156	0.2125	1.13542	-0.008464	-0.0495288	0.704806	1.16719
AMHR2	-0.605159	-0.677919	0.377262	-0.61847	-0.102332	-0.00650527	0.142441	0.183598	-0.529495	-0.56617	-0.393145	0.926578	0.163876	-0.282909	0.185342	-0.116196	-0.439719	-0.706017	-0.5566	-0.688942	0.132668	-0.269648	0.352163	-0.0214069
AMIGO1	0.461951	0.716191	0.187026	0.232825	0.515061	0.684192	-0.459675	-0.600603	1.35866	0.352067	0.454636	-0.00812526	-0.226384	0.276145	-0.990176	-0.0516425	-0.184598	0.511468	-0.815052	-0.0807377	-1.26699	-0.862645	-1.05452	-0.839187
AMIGO2	0.588083	0.462594	0.551686	0.761685	-0.574519	0.665337	-0.998682	-0.359164	0.575901	0.654831	0.0947047	0.854152	-0.213984	0.443117	-0.205415	-0.0980323	-0.617768	0.0168864	-0.419527	-0.0196581	-1.41261	-1.09574	-0.920872	-1.19306
AMMECR1	0.443818	0.61562	0.453388	0.34844	-0.0137576	-0.210824	-0.274773	0.0209452	0.17162	0.434511	0.347554	0.206408	-0.633282	-0.445028	-0.200804	-0.0339859	0.211332	0.0503218	0.132041	0.128992	-0.52346	-0.505277	-0.709032	-0.455369
AMMECR1L	0.591051	0.242621	0.257052	0.872979	0.601321	0.391544	-0.706766	-0.0512007	0.707235	0.0910195	0.165249	0.782103	-0.0332439	-0.937295	-0.692104	0.274075	0.140213	-0.097506	-0.403738	0.340842	-0.347573	-0.714325	-0.968248	-0.660012
AMN	0.317994	0.291478	0.431515	-0.146722	1.02687	0.578596	0.202733	-0.912104	-0.599625	-0.744734	-0.616546	-0.601578	0.842212	0.478098	0.624714	-0.904795	0.0532477	0.106542	-0.293464	-0.0667983	1.17724	0.475782	0.596512	-0.365786
AMN1	0.935211	0.522531	0.992688	0.972473	0.203873	-0.556432	-0.854261	-0.121499	1.46074	1.21289	1.20165	1.57295	1.11145	-0.283363	-0.459574	0.887532	-2.18941	-1.21674	-0.352871	-1.42284	-2.53439	-1.31881	-2.65235	-2.97408
AMOT	0.25575	-0.517467	-0.0289945	0.012852	0.450433	-0.215528	-0.517939	0.25126	-0.00994019	0.303842	0.261745	0.0591335	0.896976	0.345154	-0.481243	0.471239	-1.52907	-0.923482	-0.828188	-0.734985	-0.332143	-0.812896	-0.417744	-0.360965
AMOTL1	-0.397666	-0.246204	-0.298427	-0.815936	0.924985	-0.521992	1.27717	-0.446492	0.0119091	-0.212867	-0.10717	-0.308639	0.827416	0.275221	0.873756	0.519622	0.655945	-0.912181	-1.01185	-0.265291	0.950999	0.110953	1.77655	0.593849
AMOTL2	-1.11797	-1.1256	0.360705	-0.302458	-0.391842	0.890691	-0.196874	-0.502142	-0.959808	-0.917619	-0.71589	-0.965714	-0.186829	-0.316486	-0.144003	-0.0312838	0.927895	-1.3174	0.542157	0.218661	-0.180467	0.442228	0.173285	0.949321
AMPD1	-1.07978	-1.16023	-1.08924	-1.08571	-0.416708	0.779842	-0.207496	-0.481324	-0.985595	-0.969142	-0.835461	0.0605143	-0.187899	-0.59495	-0.144634	-0.525704	3.86563	3.90647	3.68436	3.77018	1.92086	1.91195	0.88394	1.47448
AMPD2	0.54349	0.240284	0.206921	0.640593	-0.368619	-0.467926	-0.638704	0.425421	-0.20225	-0.523417	-0.667932	-0.0275091	-0.452721	-0.635356	-0.606018	-0.0345371	0.489248	0.231882	0.461698	0.43358	-0.220146	-0.106001	-0.378168	0.437455
AMPD3	0.329426	-0.214942	0.00513443	0.360605	-0.525273	0.149973	-0.580987	-0.272183	-0.973773	0.191529	0.552461	0.389533	-0.262947	0.580677	-0.644792	-0.303294	-1.88112	-3.04839	-0.788173	-1.48217	-1.00125	-1.56759	-1.06947	-1.31599
AMPH	-0.822426	-0.823361	-0.772468	-0.903914	0.196589	-0.315438	-0.038648	-0.325112	-0.696518	-0.520351	0.397963	-0.794267	-0.00287366	0.645774	0.172807	-0.34594	-0.683645	-0.929018	0.448731	0.363782	-0.0693355	-0.416728	-0.128137	-0.245761
AMT	0.285666	0.41159	0.114556	0.26897	-0.500338	-0.302948	-0.331508	0.636854	0.483812	1.03481	0.658471	0.598298	-0.163083	0.282341	-0.00596583	0.691793	-1.53932	-0.669171	-0.214202	-1.42193	-1.70751	-1.35368	-1.71216	-1.12613
AMTN	-0.539051	-0.558398	-0.492277	-0.649477	-0.117295	0.0070653	0.187337	-0.0542405	-0.444068	-0.40272	0.571806	-0.627339	0.10358	-0.243421	0.113845	-0.196145	-0.266789	0.598727	0.290756	-0.709941	0.0526627	-0.251612	1.11715	-0.0813717
AMY1C	0.494526	0.66082	0.425421	1.0454	-0.631322	0.0126768	-1.20385	0.528942	0.551973	0.781032	0.343803	0.863654	-0.567448	0.301159	-0.442828	0.525472	-2.16467	-1.39946	-1.26676	-1.22023	-2.34557	-2.13429	-3.33879	-1.86306
AMZ1	1.05606	1.17239	1.11973	0.723708	0.591363	0.487807	-0.130888	-0.498186	0.668404	0.561733	0.587829	0.312167	-0.316428	-0.0339513	-0.520224	-0.606361	-2.51133	-2.99802	-4.00677	-2.38456	-1.28362	-1.88819	-1.75307	-2.03874
AMZ2	-0.0583699	0.0357104	-0.0940516	0.0441853	-0.410868	-0.879219	-0.592253	-0.148409	0.103055	0.357177	0.175678	0.319633	-0.393596	-0.776975	-0.230561	0.0467765	0.39735	0.414979	0.0710322	0.62157	0.158672	-0.111503	-0.170951	0.343026
AMZ2P1	-0.300018	-0.316799	-0.505144	-0.304348	0.0583891	-1.15238	-0.618936	-0.181713	0.153999	0.215774	0.213063	-0.0291977	-0.071545	-0.672719	-0.333244	-0.301105	0.872908	0.160383	0.30864	0.408392	0.983422	0.286636	-0.29154	0.281977
ANAPC1	0.156636	0.254647	0.237393	-0.0168915	-0.149027	-0.513676	-0.44943	-0.602836	-0.013302	0.305014	0.0954082	0.140391	-0.135349	0.0410319	-0.175725	-0.28233	0.501813	0.416169	0.321965	0.126186	0.399212	-0.334965	0.244383	0.125097
ANAPC10	0.234024	-0.023529	0.0700599	0.238728	0.135679	-0.4318	-0.692777	-0.150736	0.401988	-0.0220968	0.174392	0.28806	-0.300935	-0.552865	-0.499899	-0.180743	0.169672	0.343722	0.113674	0.455982	0.0605815	-0.0136323	-0.0234339	-0.314339
ANAPC11	0.212246	0.0414787	0.20713	0.0836802	-0.138289	0.332645	0.17607	-0.391721	0.0677306	-0.449005	-0.261217	0.0448507	-0.408804	-0.251108	-0.36326	-0.513189	1.40297	1.12564	0.789444	1.32113	1.13591	1.57127	1.85669	1.39989
ANAPC13	-0.174395	-0.191404	-0.28822	0.12387	0.018287	-0.585265	-0.48621	0.205969	-0.237	-0.290886	-0.665505	0.0135602	-0.0906043	-0.897955	-0.630731	0.166411	0.956578	0.754378	0.471775	1.26039	0.972646	0.896661	1.29984	1.26496
ANAPC15	0.187124	0.144036	0.338079	-0.073038	-0.563351	-0.469398	0.10365	-0.732267	0.085398	0.25551	0.290545	0.00606793	-0.607892	-0.760023	-0.331858	-1.0392	1.58148	1.17921	1.01539	1.29529	1.06457	1.34014	1.91293	1.31752
ANAPC16	0.314781	0.358088	0.440334	0.36486	0.229392	-0.27864	-0.741399	-0.477046	0.602356	0.611082	0.415105	0.864761	-0.194939	-0.232833	-0.524999	0.130056	-1.39383	-0.859176	-1.10633	-0.461802	-1.19023	-1.59649	-1.55507	-1.94509
ANAPC1P1	0.432724	0.137389	0.29882	-0.0595729	0.584527	-0.728386	-0.723933	-0.399048	0.0541573	0.543238	0.449589	0.28703	0.592431	0.541601	0.142796	0.103493	-0.653928	-0.0323352	-0.696301	-0.3654	1.06488	-0.447678	0.176675	-0.369861
ANAPC2	-0.0961107	-0.251437	-0.274514	-0.0233932	-0.0169875	-0.749238	-0.331348	-0.214552	-0.117381	-0.0078349	0.158165	0.0354741	-0.0712398	-0.614476	-0.436457	-0.38126	0.658777	0.537666	0.574123	0.643547	1.02557	0.385725	0.030593	0.349585
ANAPC4	0.405455	0.585773	0.634099	0.37458	0.0319028	0.132157	-0.398077	0.231226	0.301703	0.515084	0.583708	0.287938	-0.561267	-0.273488	-0.414845	-0.3498	0.121511	0.110864	0.384541	0.180336	-0.533725	-0.401799	-0.433303	-0.422511
ANAPC5	-0.0295991	0.0597532	0.0565561	0.187611	-0.278037	-0.121499	-0.214552	0.0152475	-0.100608	0.012319	0.0758989	0.148951	-0.623642	-0.0792888	-0.41136	-0.48506	0.914281	0.728602	0.698354	1.11694	0.954316	0.937665	1.19858	0.719982
ANAPC7	-0.0505437	0.0322385	-0.337359	0.312707	-0.398191	-1.51748	-1.22103	0.249428	-0.0525358	-0.0654249	0.00725978	0.255946	-0.117042	-1.20597	-1.24841	0.203718	0.490965	0.435215	0.38582	0.498853	0.155206	-0.254663	-0.224496	0.464163
ANG	-1.12835	0.262988	-0.448014	0.669387	0.497235	-0.148646	-0.483162	-0.336296	-5.18059	-2.4747	-2.73787	-3.18845	-3.57505	-2.79822	-2.76263	-2.75726	1.53528	1.93698	1.6107	2.29249	2.07873	2.38852	2.50407	2.35655
ANGEL1	0.343399	0.026146	0.0445609	0.430547	0.0878677	-0.338762	-0.853978	-0.55914	0.436539	0.076677	0.0732362	0.636991	0.08471	-0.600191	-1.0208	-0.344946	0.405116	0.280631	0.300861	0.76464	0.277596	0.0457338	-0.45187	-0.467963
ANGEL2	0.251803	0.442321	0.345479	0.571345	-0.288802	-0.0494423	-0.538247	-0.59399	0.359273	0.575901	0.386091	0.623507	-0.29455	0.26973	-0.235679	0.10723	-0.661061	-0.263486	-0.538859	-0.0889282	-0.85093	-0.860573	-0.802148	-1.01862
ANGPT1	-0.404382	-0.396924	-0.358926	-0.298806	0.343399	0.299566	0.418812	0.879046	-0.301662	-0.284871	-0.213791	-0.240162	0.466941	0.0835764	0.562787	0.329415	0.191729	-0.307515	-0.0636034	-0.15276	0.474844	0.121581	0.986225	0.282283
ANGPT2	-0.242032	0.456807	0.428744	0.24699	-0.522937	-0.338381	-0.359988	0.263181	0.499387	1.681	1.06082	1.42495	-1.13433	2.54718	0.0581883	-0.0285395	-2.08011	-2.14273	-1.64673	-0.779107	-0.871285	-0.212505	-0.81228	-0.568596
ANGPT4	-1.15824	-0.0313824	0.0877161	0.133838	-0.51001	1.2999	0.800781	-0.170671	-0.733314	-0.965276	-0.313856	0.147274	0.759879	1.92117	1.22059	1.33812	-0.99449	0.579209	-1.33277	0.0615903	-0.191983	2.79238	0.310452	1.1255
ANGPTL1	1.58749	1.18952	1.10831	1.23542	-0.967069	-0.056078	-0.331942	-0.604685	0.688329	1.06289	0.825921	0.856144	-1.18683	0.355427	-0.0477312	-0.608492	-1.83972	-2.62924	-1.05838	-2.39313	-1.73296	-1.9575	-1.77274	-1.41186
ANGPTL2	-0.568371	-0.59378	-0.519598	-0.705981	1.06362	0.503846	0.087046	-0.117878	0.567823	-0.443317	-0.303294	-0.150097	0.0578827	-0.27611	0.0741723	-0.0665046	-0.310478	1.10913	-0.596349	-0.758863	0.464905	-0.295332	-0.03445	0.273594
ANGPTL3	-0.344619	-0.323271	-0.303172	-0.251295	0.747642	0.403644	0.484513	0.360875	-0.251655	-0.239857	-0.121397	-0.196176	0.565937	0.203302	0.56944	0.444782	-0.0824797	-0.219287	-0.176778	-0.091695	0.628963	0.22555	0.437514	0.395254
ANGPTL4	-0.307949	-0.0343729	-0.251437	-0.344258	0.261664	0.269022	0.383575	0.28257	-0.16447	-0.181291	0.0422154	-0.319288	0.414249	0.0309078	0.490916	1.55286	0.0114999	-0.121652	-0.026016	0.21355	0.467995	0.0429647	0.35386	0.451752
ANGPTL5	-0.276377	-0.274773	-0.206902	-0.304608	0.372377	0.321625	0.397847	0.272427	-0.164341	-0.129011	0.00525772	-0.249588	0.479231	0.114847	0.441359	0.342761	0.0549063	-0.00992283	-0.022141	-0.157806	0.486298	0.130492	0.339291	0.25063
ANGPTL6	0.916309	1.2776	1.06305	1.43479	0.877873	0.832595	0.725631	1.15708	-0.38455	-0.753591	-1.09178	-0.941913	-0.825148	-0.45171	-0.790541	-1.23479	0.222229	0.103471	-0.308344	0.359697	-0.659465	0.0844952	-0.105045	-0.0881349
ANGPTL7	-0.321115	-0.289966	-0.278266	-0.269501	0.41642	0.378255	0.477937	0.341839	4.9025e-05	-0.208192	-0.0704167	-0.208192	0.586685	0.173375	0.560058	0.435514	-0.0409818	-0.172503	-0.125844	-0.108168	0.647241	0.203545	0.425066	0.376774
ANGPTL8	-0.336019	0.0107595	-0.0237402	-0.36689	0.700056	0.232362	0.33633	0.242512	-0.0390161	-0.211394	0.0440881	-0.33562	0.37337	0.0736964	0.460184	0.203993	-0.033956	0.145577	-0.061222	-0.289657	0.370607	0.798251	0.326143	1.66137
ANHX	-0.326525	-0.257025	-0.289306	-0.285248	0.355077	0.329593	0.458223	0.346512	0.0467765	-0.21235	-0.114253	-0.235095	0.54482	0.162287	0.638161	0.331924	-0.0589961	-0.20981	0.0545627	-0.143086	0.5261	0.121262	0.483054	0.332556
ANK1	0.259178	0.140277	0.23774	0.258435	-0.458539	0.475229	-0.161061	0.376904	0.214508	0.191883	0.229095	0.139899	-0.620877	-0.327592	-0.052974	0.469448	-1.52068	-0.727886	-0.516705	-1.31024	-1.91375	-1.48871	-1.46131	-0.944292
ANK2	-0.929225	-0.53228	0.401095	-0.297617	0.486793	0.457198	-0.16005	-0.47143	-0.464953	-0.0379651	-0.745742	-0.680698	0.733869	-0.020792	0.783115	0.7819	-0.744369	-0.0168374	0.221841	-1.16471	-0.15787	0.414157	0.830254	-0.352972
ANK3	2.01386	2.0904	2.37081	2.519	0.658554	0.592497	2.23239	0.509302	-0.225445	-0.452989	-1.12819	-0.0198155	0.00748975	0.24484	1.01961	-1.17644	-1.49543	-1.30259	-1.31698	-1.28081	-1.06611	-1.22112	-0.541006	-1.19681
ANKAR	0.175594	0.0271941	0.28033	0.303362	-0.561197	-0.291278	-0.716429	-0.618287	1.635	1.18504	1.49978	1.69475	-0.217371	0.600474	0.30491	0.711378	-1.54065	-1.77886	0.42458	-1.30453	-1.98346	-1.83972	-2.86386	-1.74441
ANKDD1A	-0.225385	0.334001	-1.15238	0.132377	-0.850252	-0.550379	-0.187727	-0.580893	-1.54182	-0.159451	-1.22883	-0.824089	-0.553624	-0.710134	0.298582	-0.343535	1.28515	1.08323	1.21688	1.42434	1.72324	1.20523	1.00966	1.472
ANKDD1B	-0.652034	-0.110487	-0.328112	-0.468835	0.247058	0.124926	0.782928	-0.0523239	-0.208022	0.0504898	-0.343963	-0.396944	-0.00701803	-0.0681073	0.117146	0.13707	0.291543	0.0990581	-0.338184	-0.826676	-0.0363795	0.0605815	0.240428	-0.157776
ANKEF1	-0.113664	-0.168174	-0.32272	0.247614	0.582145	-0.164935	-1.72063	-0.758088	-0.444793	-0.412458	-0.374176	0.0866253	-0.0789256	-0.301923	-2.62978	-1.01345	0.763586	0.766009	0.445922	0.985389	1.47473	0.345564	-0.262535	0.0979734
ANKFN1	-0.67496	-0.677136	-0.640158	-0.692675	0.0645425	-0.111788	0.0793514	-0.141289	0.516695	-0.546704	-0.483051	-0.594525	1.20312	0.306295	0.090224	-0.128825	-0.485691	-0.699348	-0.549156	-0.61352	0.0514476	-0.259467	-0.0433431	-0.137709
ANKFY1	0.869767	-0.203053	0.543809	0.421838	-0.617159	0.208437	-0.739129	-0.468779	1.02881	-0.0390776	0.540165	0.0140035	-0.182344	0.381719	-0.578616	2.22486	-0.153494	-0.0642219	-0.830147	0.277385	-0.621536	0.0491832	-0.220208	-0.286012
ANKH	1.81488	1.04594	1.26755	1.60342	0.398295	-0.0484637	0.650659	-1.42691	1.31542	0.574524	0.831559	1.23009	-0.319365	-0.0638979	-0.967373	-1.72712	-1.62772	-1.94226	-0.597749	-0.547147	-1.57788	-1.92534	-1.65235	-2.28587
ANKHD1	-0.122442	0.236297	-0.0152352	-0.147631	-0.979242	-0.866477	-0.111097	-0.801743	0.136797	0.338581	0.0909297	0.0341506	-0.494978	-0.305779	-0.0975484	-0.452944	1.97293	1.6107	1.46669	1.76733	1.83824	1.44132	2.00409	1.75846
ANKHD1-EIF4EBP3	0.233349	-0.0610934	0.164708	0.174346	-0.306218	0.158166	-0.423403	-0.490782	0.194475	0.0907411	0.242758	0.22564	-0.136061	0.113328	-0.291271	-0.215793	0.46569	0.0744663	0.182157	0.584799	-0.175849	0.24644	-0.439527	-0.217206
ANKIB1	0.110181	0.238623	0.0699876	0.468957	-0.681848	-0.714735	-0.605467	0.24188	0.201268	0.161856	0.23801	0.302769	-0.554313	-1.19332	-0.783432	-0.551356	1.34234	1.24731	1.42594	1.73284	-0.24321	0.111846	-0.514258	0.577304
ANKK1	1.91101	1.9448	2.38593	2.00687	-0.764538	0.232493	-0.9872	-0.304248	1.52589	1.28808	2.08222	1.59017	-1.00255	0.574719	0.0616111	-0.195023	-1.4122	-0.445005	-3.33029	0.0101013	-2.14273	-1.4291	-2.48046	-1.79083
ANKLE1	0.644394	0.375058	-0.305753	0.827268	-0.432587	-0.478714	-1.78338	1.17017	-0.905822	-1.39864	-1.77039	-1.09694	-0.499071	-2.10457	-2.39697	-0.472085	1.14895	0.384796	0.505834	0.819007	0.932877	0.378957	-0.181426	0.971303
ANKLE2	0.293261	0.371038	0.418084	0.534238	0.107797	-0.864924	-0.715186	0.13004	0.48606	0.392864	0.332739	0.574719	-0.263629	-0.358033	-0.536214	0.177647	0.154013	-0.0324127	0.0941235	0.202917	-0.311128	-0.718663	-0.574919	-0.342479
ANKMY1	1.0454	0.589771	0.544145	0.337936	-0.297848	0.152291	0.287747	0.522821	0.723275	0.226252	0.484586	0.136625	-0.579971	-0.136967	0.369287	0.504755	0.232249	-0.174351	0.113175	0.0658963	-1.02368	-0.843479	-0.615713	-1.21297
ANKMY2	0.673118	0.181512	0.591729	0.978578	-0.365954	-0.296804	-0.642503	0.477767	0.161241	-0.0021545	-0.00255352	0.32433	-0.553938	-0.427956	-0.834689	-0.333643	1.39476	0.975776	1.50428	1.31853	-0.338276	0.0606863	-0.787961	0.0875166
ANKRA2	0.10202	0.0686874	-0.0734803	0.225577	0.000644802	-0.589739	-0.655075	0.625302	0.218906	0.302378	0.286413	0.365048	-0.06734	-0.427724	-0.448771	0.766381	0.410442	0.435052	0.350235	0.410723	-0.569422	-1.22572	-0.911732	-0.504019
ANKRD1	-0.67744	-0.683551	-0.636505	0.82794	0.00837366	-0.134585	0.0561617	-0.184881	1.17925	-0.552068	-0.474915	-0.0787799	0.0860227	-0.358757	0.0605952	0.325556	-0.483179	-0.705349	-0.592858	-0.678571	0.0213846	-0.288952	-0.0740714	-0.161175
ANKRD10	0.289161	0.171235	0.0292397	0.176689	-0.335991	-0.668809	-0.665105	-0.372302	0.385196	0.314233	0.278857	0.381915	-0.117276	-0.667813	-0.259733	-0.111012	0.451852	0.444353	0.621335	0.379384	-0.565284	-0.532583	-0.560795	-0.325396
ANKRD10-IT1	0.163939	0.451732	0.111088	0.155172	-0.675671	-0.840305	-0.3078	-0.406274	0.196857	0.486582	0.133121	0.255847	-0.68299	-0.06849	0.417041	-0.489661	0.839639	0.629942	1.24006	0.445722	-0.832525	-0.117049	-0.61653	-0.286584
ANKRD11	0.567258	0.289322	0.234092	0.414119	-0.296082	-0.66143	-0.287436	-0.488333	0.506898	0.460363	0.441167	0.365999	0.0732979	-0.0151311	-0.00860737	-0.495762	0.0870299	-0.305973	0.0400045	-0.00787764	-0.496078	-0.823896	-0.883058	-0.655293
ANKRD12	0.299566	0.591051	0.588961	0.429582	0.507152	1.32316	-0.619778	-0.631322	0.357026	0.469031	0.552843	0.3629	0.513754	0.142331	-0.256097	-0.66039	-0.216754	0.236528	0.162624	-0.026016	-0.457851	-0.815968	-1.48296	-1.00983
ANKRD13A	0.793228	0.771043	0.929322	0.741324	0.738303	0.402189	0.303803	-0.123271	0.0167456	0.182857	0.110808	0.0942162	-0.0228341	-0.0251904	-0.0865321	-0.775663	0.229401	0.297558	0.312593	0.171797	-0.645074	-0.70794	-0.665606	-0.95294
ANKRD13B	0.0674142	0.241021	0.332344	0.16201	-0.367274	-0.768275	0.353846	-0.565215	-0.890055	-0.602879	-0.758591	-0.944613	-1.03793	-0.702277	-0.5712	0.270305	0.561295	0.719982	0.647591	0.408212	-0.450863	0.527835	0.289111	0.169093
ANKRD13C	0.237313	0.0797352	0.250012	0.894326	0.633342	0.723981	-0.165045	0.41854	0.250673	-0.0251637	-0.281854	0.321441	-0.0492373	0.458012	-0.41777	0.0599231	-0.0515853	0.252333	-0.0451127	0.365571	-0.393966	-0.477366	-0.677323	-0.135838
ANKRD13D	0.528942	0.299526	0.397289	0.309353	-0.393802	0.663686	0.0891472	0.351223	0.59591	0.173981	0.470045	0.470124	-0.762336	0.302803	-0.292635	-0.224876	-0.0309626	-0.291063	-0.20588	-0.35504	-1.05899	-0.437167	-0.634661	-0.658729
ANKRD16	-0.0454829	-0.443594	-0.0701717	0.00901443	-0.432709	0.0692158	-0.454947	-0.245226	0.34134	-0.460981	0.208078	0.186199	-0.481132	-0.420474	-0.833493	-0.297484	1.70031	1.45332	1.62269	1.79449	1.58321	1.92086	1.96095	1.33067
ANKRD17	0.352153	0.363174	0.0629495	0.319824	0.0664006	-1.04282	-0.633005	-0.254425	0.381773	0.445477	0.142665	0.579969	0.158165	-0.500046	-0.466795	0.0542899	0.311806	0.0539911	0.0674985	0.463974	-0.134158	-0.448953	-0.492777	-0.420164
ANKRD18A	0.02063	-0.284463	-0.138675	-0.344795	0.30161	0.285905	0.332883	0.907589	-0.16364	-0.136018	0.00912465	-0.293907	0.403608	0.111399	1.2377	0.261891	0.0564677	-0.122295	-0.0373842	-0.212748	0.389968	0.0762644	0.265565	0.612913
ANKRD18B	-0.332256	-0.0512766	-0.295586	-0.256553	0.404756	0.358293	0.507447	0.369544	-0.216344	0.0683846	-0.12973	-0.19908	0.601435	0.168492	0.651416	0.393777	-0.0689465	-0.210911	0.0563966	-0.103869	0.57684	0.170644	0.504008	0.361046
ANKRD18CP	1.08269	0.861072	0.311942	0.927595	0.146301	-0.574519	0.03588	-0.0832626	0.918402	-0.268561	0.167047	0.00871169	-0.663293	0.0895982	-0.0226297	-0.423728	0.187261	-0.0567788	-2.77895	-0.054332	0.281491	-0.898887	-0.554952	-0.83588
ANKRD18DP	0.176329	1.17051	0.492275	0.966898	-0.730031	-0.528659	0.11668	0.0868827	0.508375	1.34559	1.95796	1.1503	0.205556	-0.771496	0.123361	-0.129877	-0.633906	-1.13229	-0.62675	-1.7288	-1.80429	-0.980278	-0.75166	-0.522253
ANKRD19P	0.473007	-0.523506	-0.144013	0.0103489	-0.185983	-0.203053	0.00151472	-0.256472	0.586489	0.012249	0.153854	0.139118	0.00560271	0.387784	0.0178097	-0.111839	-0.337636	-0.834683	-0.857365	-0.822715	0.337826	-0.350291	-0.112571	-0.190054
ANKRD2	0.572172	-0.9728	-0.814064	-1.20058	0.424284	1.01631	1.08413	0.595946	-1.06996	-1.02938	-0.901202	-0.210236	1.57594	-0.72097	-0.217583	0.75904	-0.207583	0.160963	-1.45513	-1.23126	0.548638	1.6011	1.02721	1.29568
ANKRD20A1	0.0594943	0.018287	-0.414809	0.0392561	-0.312301	0.214338	-0.22551	0.435298	-0.0175439	0.059072	-0.174152	-0.118172	-0.213319	0.664231	-0.0976173	0.864025	-0.222158	-0.419068	-0.891209	-0.0772854	-0.438227	0.147003	-0.515777	-0.168329
ANKRD20A11P	0.82848	-0.356625	0.536508	-1.66655	-1.06728	0.411145	-0.931938	-0.0607361	1.20772	0.310947	0.795213	-1.72712	-0.728642	0.777968	0.217653	0.562357	-0.894856	-0.288436	0.634229	-2.42721	-1.02013	0.140029	-0.87765	0.0807111
ANKRD20A19P	-0.264232	-1.11605	0.34864	-1.00071	-0.426132	0.272189	0.585773	-0.388329	-0.925695	-0.910636	0.146351	-0.94477	0.101249	0.959746	0.705921	0.464289	-0.00795358	-1.29769	0.25776	-0.282188	-0.116715	0.346209	-0.150281	0.273735
ANKRD20A2	0.655193	-0.852861	0.357265	-0.173368	-0.758088	0.729843	0.161579	0.482364	0.703907	-0.950818	0.194875	-0.803427	-0.57014	0.509886	0.103055	-0.0496469	0.260393	-2.0942	-0.025679	0.0885678	-0.584997	0.25603	-0.433581	0.144689
ANKRD20A4	-0.0853962	-1.19593	-0.257624	-0.810196	-0.384202	0.811953	-0.193491	-0.298282	-0.429098	-0.984815	0.262946	-0.101602	-0.20332	0.599688	-0.1136	-0.0513541	0.237089	-1.39525	0.0852976	0.032877	-0.0169103	-0.0457364	0.151118	-0.393927
ANKRD20A5P	2.11721	0.270655	0.709762	-0.0127673	-1.09753	0.207821	-0.589047	-0.229436	1.68364	0.915029	0.797614	-0.666538	-0.390841	0.607813	0.0201678	0.10822	0.181867	-0.565755	-0.459616	-0.777842	-0.976686	-0.103281	-0.991733	-0.417984
ANKRD20A8P	0.315033	-1.0419	0.795929	-1.20916	-0.604177	0.9803	0.319393	0.244793	0.670965	-0.877198	0.551517	-0.919594	-0.335956	0.7819	0.716648	0.492345	0.294622	-2.12141	0.762316	-0.423529	-0.103458	0.0481622	-0.577496	-0.142329
ANKRD20A9P	0.523421	-0.5442	0.212392	-0.764377	-0.144013	0.508847	0.143503	-0.287142	0.56149	-0.769622	1.02203	-0.983182	0.193866	0.704502	0.307111	-0.139472	-0.364438	-1.26477	0.78261	-1.19306	-0.217991	0.298264	-0.187891	-0.194931
ANKRD22	-0.419517	-0.413368	-0.389808	-0.337359	0.297435	0.303362	0.340904	0.753963	-0.323328	-0.316992	-0.249123	-0.280559	0.405453	0.774703	0.417489	0.278377	-0.168163	-0.338184	-0.315566	-0.184706	1.30188	0.509633	0.301321	0.261259
ANKRD23	0.143095	-0.00902477	-0.135614	-0.183645	-0.665229	-0.272668	-0.593877	0.38133	0.226409	0.283255	0.0437773	-0.0855557	-0.926718	-0.281194	-0.644416	-0.807529	0.875418	1.00146	0.539858	0.90136	0.704078	0.49454	0.757084	0.556641
ANKRD24	0.075735	0.191076	0.188096	0.377129	0.332275	-0.573551	-0.658948	0.738303	-0.668921	-0.0548544	-0.272591	-0.91932	-0.263951	-0.590193	-1.05316	-0.813714	1.25358	0.860137	0.493752	0.564425	-0.274608	0.412548	-0.203317	0.709459
ANKRD26	-0.223123	-0.328764	-0.476557	0.392888	-0.342324	-0.400194	-0.151705	-0.172231	0.396305	-0.177674	0.157821	0.693925	-0.223331	-0.251773	0.838461	-0.180981	-0.0917518	-0.372833	-0.211076	0.155769	0.0652459	-0.374307	-0.188629	0.210128
ANKRD26P1	-0.8399	-0.0706548	-0.78192	-0.897032	-0.281973	0.457518	0.0349222	0.258435	-0.0289214	-0.59884	-0.600224	-0.808436	0.985376	0.551199	0.130377	-0.0224084	0.217346	-0.111056	-0.244802	0.323191	1.32076	1.09922	-0.14536	0.64708
ANKRD26P3	2.14158	0.0973358	-1.23607	2.05695	-0.499597	1.96885	0.995016	0.978801	-1.12204	-1.09178	-0.971593	-1.1204	-0.287462	-0.690989	-0.229106	-0.703565	3.01218	-1.57014	1.16719	0.798111	-0.2743	0.306288	-0.317408	-0.51179
ANKRD27	0.703385	0.734698	0.561885	0.716743	0.0664408	-0.362796	-0.587245	-0.416823	0.499938	0.418482	0.398629	0.425704	-0.250737	-0.101244	-0.455049	-0.382815	0.116393	0.0375597	-0.0420668	0.202436	-0.675957	-0.729334	-1.01371	-0.681464
ANKRD28	0.0715221	0.365308	0.145193	0.464209	-0.0780068	-0.448817	-0.7522	-0.365882	0.0711028	0.254693	0.238946	0.419072	-0.812267	-0.851471	-1.32915	-0.601038	0.345181	0.524675	0.602232	1.10997	-0.166504	-0.285292	-0.606059	0.0380087
ANKRD29	-0.47692	-0.477914	0.087507	-0.405696	0.227856	0.223618	0.278376	0.180399	-0.374941	-0.37445	-0.312327	-0.3477	0.329252	0.0229046	0.334276	0.193127	-0.238878	-0.424721	-0.415174	-0.266555	0.341225	0.036878	0.220383	0.171096
ANKRD30A	-0.605467	-0.395226	-0.578009	-0.431241	0.485669	0.130005	0.687104	0.37512	-0.278287	-0.0835695	-0.15495	-0.552865	0.151935	0.0605143	0.153553	-0.083967	0.103974	-0.311886	-0.58164	-0.577697	0.098965	0.0645125	0.0144936	1.24692
ANKRD30B	-0.164675	-0.71149	-0.630693	-0.227713	0.688268	0.252799	0.1646	0.0294794	-0.0398321	-0.58222	-0.455943	-0.161337	0.612818	-0.248541	0.217993	0.346695	0.118011	-0.0767145	-0.638043	-0.589008	0.710529	-0.204069	0.854467	-0.0181901
ANKRD30BL	0.653987	-0.0133467	1.80491	-0.400782	0.699979	0.459559	0.738434	0.0538302	-1.9007	-1.53268	-0.732727	-2.78654	-0.467558	-0.745129	-0.644375	-1.80864	0.483886	1.4395	1.35377	-0.0677251	0.960274	-0.432419	-0.107732	0.379602
ANKRD30BP2	0.00626061	-0.168385	0.369544	0.0526069	0.596809	-0.26802	0.72726	0.401158	-0.641075	-1.15704	-0.0369591	-0.920161	-0.309462	-0.731449	-0.130938	-0.360898	0.696224	0.684079	0.907477	0.342525	1.28072	0.332169	0.649426	0.59839
ANKRD30BP3	-1.08339	-0.499214	-0.769024	1.32854	-0.324183	-0.302617	-0.0563011	-0.340689	0.174304	-0.884122	-0.11	-0.889645	-0.0677583	-0.479789	-0.0683581	0.423237	-0.112176	0.379503	-1.44039	1.14107	-0.0935016	0.519619	-0.159143	-0.25744
ANKRD31	-0.342077	0.133932	-0.325627	-0.36701	0.14325	0.25663	0.315826	-0.155645	0.115756	-0.036521	0.0524131	-0.711621	0.0382559	-0.204468	0.045916	-0.208532	-0.461215	-0.827993	-0.557389	-0.802148	-0.00205606	-0.324159	0.282355	-0.165945
ANKRD33	0.0750475	0.0230991	0.287005	-0.163417	0.36949	0.434837	0.887861	-0.375101	-0.10802	-0.0409598	-0.143133	-0.148936	-0.101413	0.54097	0.240182	-0.198035	0.224496	0.315759	0.212153	0.200791	-0.283744	0.787346	0.477114	0.299953
ANKRD33B	0.374034	1.22126	0.485896	0.36441	0.648022	0.0489263	-0.168802	-0.295738	-0.0828426	0.0805877	-0.21298	-0.122121	-0.125777	0.269034	0.195331	-0.563389	0.114353	-0.300846	-1.6007	-0.0227131	-0.289628	-0.335167	-0.734593	-0.321588
ANKRD34A	1.47553	0.622036	0.222201	0.881592	1.07112	0.636205	-0.898623	0.0696363	-0.133173	-1.79025	0.347651	-0.820098	1.87128	-0.500438	-0.839455	-0.130817	0.274066	-1.51105	-1.80267	0.185834	-0.186187	-1.35419	-0.181068	-1.14747
ANKRD34B	-0.607883	-0.626462	-0.598031	-0.590444	0.0705497	0.0640279	0.126438	-0.00622048	-0.501406	-0.507612	1.11731	-0.510134	0.179918	-0.172915	0.159922	-0.0453459	-0.402775	-0.276617	-0.619044	-0.492078	0.137676	-0.140518	0.0245895	-0.0329229
ANKRD34C	-0.24939	-0.250123	-0.21325	-0.275764	0.513055	0.336263	0.450762	0.29678	-0.109237	-0.0946126	-0.0428358	-0.213379	0.669952	0.153679	0.499387	0.386283	0.0797263	-0.092714	0.0439486	-0.0927755	0.68055	0.187565	0.38793	0.312069
ANKRD34C-AS1	0.417147	-0.931938	0.571472	0.219354	-0.233845	-0.288802	0.981227	-0.327057	-0.812267	0.387933	-0.672587	-0.347498	-0.0406334	-0.480183	0.932739	1.46285	-0.593692	0.0664124	-1.09749	-0.905389	0.885966	-0.39592	0.219568	1.56054
ANKRD35	0.750711	0.0896105	0.315947	0.12535	-1.00844	-0.243133	0.624771	0.624771	-1.71599	-1.0713	-0.179429	-0.080986	-0.80942	0.178261	0.792197	-1.39684	1.27187	1.75235	0.671589	0.648501	-0.347791	0.812778	-0.648051	-0.513704
ANKRD36	0.357628	1.13004	0.326068	0.103073	0.168458	-0.877112	0.0740237	-0.626194	0.176678	0.762052	-0.192778	-0.116302	0.043511	-0.662183	0.445722	-0.780808	1.46383	2.04735	1.33831	0.96251	1.13499	0.085556	0.777738	0.232069
ANKRD36B	0.597637	0.472927	0.350811	0.621911	-0.252037	0.449212	-0.305964	-0.411811	-0.00856583	0.364425	-0.178413	0.0870433	-0.284216	0.692984	0.00963159	-0.49102	0.327597	0.241203	-0.00601482	0.161564	-0.858993	0.0875753	-0.400531	-0.546034
ANKRD36BP1	0.207751	0.458935	0.585773	0.471408	0.233047	-0.311062	-0.102286	-0.837143	0.22564	0.55756	0.711024	0.552843	-0.203625	-0.135903	-0.25043	-1.02281	-1.09574	-1.29297	-0.608238	-1.50331	-1.91055	-1.79603	-1.64559	-1.79178
ANKRD36BP2	0.189947	0.0907376	0.180528	0.446972	0.0933877	-0.681174	-0.551269	-0.886911	-0.92626	-0.53118	-1.26983	-0.999196	-0.67378	-0.892309	-0.729792	-1.40916	3.69834	3.73908	3.70754	4.03797	2.92361	2.82832	2.06053	2.60477
ANKRD36C	0.548667	0.577962	0.587421	0.308067	-0.395455	-0.489796	-0.331165	-0.539799	0.265586	0.415777	0.0850021	-0.101817	-0.227704	-0.287257	-0.00560597	-0.783432	0.536365	0.523856	0.477339	0.0413684	-0.559479	-0.717051	-0.457474	-0.521969
ANKRD37	-0.182963	-0.154627	0.253821	-0.458786	-0.903914	-0.991382	0.0780456	-0.361653	-0.122645	-0.113004	0.37186	-0.470094	-1.51619	-1.30146	0.765971	-0.409595	1.78127	1.40646	0.923743	1.92086	1.11427	1.09825	0.133597	0.649568
ANKRD39	-0.0317042	0.178456	0.101603	-0.130451	-0.63892	-0.206847	0.137821	-0.449249	0.124224	0.141879	0.224593	-0.0943468	-0.928264	-0.719403	-0.242962	-0.913475	1.39425	1.2238	1.00146	1.33105	1.12564	1.35009	1.50861	1.07387
ANKRD40	0.110816	0.126531	0.126835	0.292072	0.0612137	0.291372	-0.752859	-0.461652	0.254613	0.287938	0.239638	0.422938	-0.119647	0.540306	-0.428157	0.32612	-0.0328498	0.00339948	-0.197147	0.384734	-0.308842	-0.0559645	-0.408497	-0.440989
ANKRD40CL	-0.162186	-0.41594	-0.491247	-0.290489	-0.221893	0.374876	0.218048	0.207372	-0.137267	-0.0864861	0.24457	-0.366319	0.0292524	-0.119091	0.212294	0.0839495	-0.151846	-0.0307473	-0.183556	-0.18493	0.0600596	-0.101395	-0.0877091	0.123965
ANKRD42	0.584527	0.16201	0.605999	0.240594	0.780952	0.401158	-0.577805	-0.548817	0.443335	0.243069	0.244281	0.254022	0.516289	0.456747	-0.184026	-0.0948207	-1.58208	-1.32029	-1.32724	-1.25457	-0.880804	-1.81163	-0.923177	-1.67527
ANKRD44	0.317454	0.679366	0.58939	0.319193	0.172469	-0.400663	-0.01105	-0.520313	0.119299	0.233856	0.486504	0.498463	-0.237455	-0.223566	0.272725	0.0991974	-0.0875323	-0.121059	-0.210444	-0.26823	-0.345711	-0.553047	-0.3589	-0.436496
ANKRD45	0.938965	0.869931	0.670381	0.896038	-0.233348	-0.284615	-0.249242	-0.536653	0.521918	1.02306	0.826372	0.85307	-0.655647	0.221609	-0.311154	-0.304833	-0.42321	-0.818638	-0.990333	-0.86385	-0.830253	-0.811104	-0.861159	-1.15853
ANKRD46	-0.0378055	0.367763	0.280686	0.0123738	-0.0251125	0.561738	-0.577531	0.185697	0.425939	0.460184	0.375228	0.288162	-0.217814	0.023367	-0.857351	1.57295	0.250417	0.38756	0.364709	0.551854	0.356729	-0.36973	-0.153756	0.31838
ANKRD49	0.132946	0.305093	0.47759	0.176362	-0.536459	-0.22382	-0.28566	-0.151083	0.501637	0.658372	0.653701	0.524405	-0.377878	-0.0262006	-0.227414	0.00985047	-1.33379	-0.749333	-0.706829	-0.532491	-1.26256	-1.2621	-1.11862	-1.06611
ANKRD50	-0.554226	-0.541588	-0.514776	-0.430021	0.200953	0.161874	0.276696	0.165992	-0.445622	-0.432684	-0.34943	0.196539	0.303842	-0.0894604	0.361691	0.159882	-0.335245	-0.520156	-0.251906	-0.302797	0.291543	-0.0295332	0.233764	0.11532
ANKRD52	0.281781	0.313755	0.202116	0.257774	-0.363882	0.420794	0.128363	0.14921	0.254223	0.135677	0.18681	0.184664	-0.707058	0.352841	-0.144304	-0.295558	-0.105969	-0.206867	-0.834683	0.026153	-0.698264	-0.310478	-0.245428	-0.312575
ANKRD53	-0.00511155	0.343065	0.528942	-0.444468	-0.715032	-0.387905	-0.479534	0.329426	-0.354045	0.723885	0.478932	0.195657	-0.495833	0.657679	-0.197977	0.899055	0.202719	0.0425069	0.331562	0.00969707	-0.428778	1.32076	0.287258	0.156767
ANKRD54	0.249203	0.0939088	-0.125411	0.235118	-0.728386	-0.77918	-0.887809	0.158795	0.239829	-0.0941549	-0.211761	0.213859	-0.235542	-0.702814	-0.995328	-0.316071	1.01614	0.440229	0.6796	0.854738	0.425249	0.58333	-0.13287	0.466838
ANKRD55	-0.699165	-0.645398	-0.665105	-0.474529	-0.000940581	-0.0654211	0.119238	0.57066	-0.579971	-0.585647	-0.0748888	-0.567539	0.141679	-0.300517	0.200023	-0.125563	-0.53295	1.79127	1.13612	-0.591233	0.066986	-0.262424	0.0479129	-0.0836582
ANKRD6	0.397847	1.63898	1.0647	1.7607	1.76772	-0.26984	-0.149286	-0.78192	0.40281	0.280625	-0.966784	-0.0422792	0.88069	-0.877505	-0.351788	-0.865487	-1.20193	0.718353	-0.191283	1.37738	-0.373933	-0.760703	-0.428778	-0.603538
ANKRD60	-0.113759	-0.280584	-0.231738	-0.358246	0.227517	0.253575	0.364604	0.269458	-0.169313	-0.178349	0.0610015	-0.324117	0.392168	0.0541573	0.488479	0.222315	0.0132668	-0.120003	-0.012485	-0.271953	0.419216	0.0194147	0.354015	0.235453
ANKRD61	0.371179	-0.601558	-1.22879	-0.492277	-0.304178	0.39424	0.253842	-0.0273688	-0.0072691	0.289953	-0.953569	0.265646	-0.276693	-0.420384	-0.210298	-0.625425	0.292761	-0.717971	-1.0468	-1.22466	-0.243652	0.750912	-0.295382	0.578465
ANKRD62	-0.411776	-0.527907	-0.416851	0.0514827	0.537107	0.140331	0.232411	0.117822	-0.530256	0.0532297	-0.36048	-0.423385	0.234017	-0.0996754	0.497119	0.088935	-0.425865	-0.111176	-0.301198	-0.258053	0.231315	0.185346	0.173002	0.0700137
ANKRD62P1-PARP4P3	-0.55914	-0.0293101	0.186345	-0.557002	0.111249	0.0352372	0.174292	0.0276188	-0.4455	-0.45171	-0.239976	-0.492815	0.635249	-0.215145	0.213181	1.00138	-0.337705	-0.544854	0.858534	0.123339	0.169829	-0.162052	0.0798779	-0.0156838
ANKRD63	0.183664	0.758557	-1.34511	0.463585	-0.775513	0.824305	-0.532402	-0.578633	0.10822	0.0431502	1.10771	0.207169	0.822764	0.998532	-0.444829	1.03502	0.478905	0.819748	0.314122	0.260238	-0.467963	0.427229	0.731862	-0.579549
ANKRD65	-0.680775	-0.661613	-0.608792	-0.737035	-0.206088	0.205751	0.0528042	0.674728	0.846173	-0.559757	-0.375958	-0.68895	0.0540385	-0.326943	0.118378	-0.248102	-0.468225	-0.67694	1.90658	-0.79806	-0.00507275	0.927601	-0.0338674	0.872217
ANKRD7	-0.919375	-0.86916	-0.85539	-0.149227	0.686743	-0.0303007	0.106592	-0.0715408	0.195066	-0.764418	-0.594748	0.149547	0.0674071	-0.300572	0.164831	-0.185827	-0.374307	-1.0147	1.48258	0.647023	0.0594487	-0.273692	1.36188	-0.0882426
ANKRD9	-0.235874	0.331503	0.0316773	-0.126717	-0.722342	0.0998017	0.275781	-0.196202	-1.58331	-1.89184	-2.34442	-2.49604	-4.75859	-1.33109	-0.350825	-2.61017	1.33132	1.80192	1.53255	1.57276	1.81427	2.04597	1.74704	1.95926
ANKS1A	0.311094	0.207658	0.311284	0.271255	-0.749238	0.463869	-0.0372581	0.134099	-0.36499	0.353464	0.141679	0.113263	-0.229518	-0.266751	-0.302477	-0.327295	-0.148902	0.124595	-0.486857	0.161424	-0.555487	-0.00728697	-0.17491	0.135518
ANKS1B	-0.125828	-0.0551086	0.0265679	0.0211997	0.108105	0.643076	0.204267	0.545634	-0.110558	-0.394745	-0.239701	-0.124066	0.329996	-0.202784	0.19651	0.00975646	-0.287386	-0.501773	0.573805	-0.48696	0.53607	0.352951	0.172404	0.496633
ANKS3	0.578695	0.386131	0.626616	0.403731	-0.233437	0.54337	-0.494053	-0.313321	0.692407	0.47457	0.639602	0.722995	-0.339498	0.30225	-0.411753	-0.224294	0.221508	0.0178723	0.134403	0.249769	-0.541474	-0.0869131	-0.653008	-0.379345
ANKS4B	-0.482285	-0.439692	-0.431081	-0.269803	0.225267	0.399961	0.48392	0.342511	-0.345872	-0.358331	-0.208101	-0.258078	0.464112	1.68364	0.625694	0.318798	-0.202765	-0.379212	-0.234895	-0.211164	0.575759	0.161564	0.503569	0.359041
ANKS6	1.45124	1.06407	1.48263	1.12306	0.512638	0.783375	-0.519234	-0.522821	1.18943	0.82797	0.971072	0.837086	0.121041	0.199707	-0.58808	-1.0358	-0.591137	-0.757182	-0.404218	-0.124184	-0.722271	-1.02117	-2.27224	-2.35081
ANKUB1	0.379732	-0.904705	-0.878046	-0.894738	-0.165897	-0.286512	-0.0574704	-0.346405	4.45153	0.711378	-0.230074	-0.0791339	-0.0228634	4.64345	-0.0390161	-0.333401	-0.777614	-1.05652	-1.08075	-0.869433	-0.0668583	-0.385469	-0.156408	-0.240663
ANKZF1	0.506486	0.295178	0.325515	0.962096	0.0689959	-0.256728	-0.812117	0.359065	0.272386	0.159849	0.209173	0.68128	-0.0951866	-0.173991	-0.822511	0.0340571	-0.0439657	0.0170829	0.237784	0.242907	-0.580712	-0.690922	-1.15853	-0.696852
ANLN	-0.97301	-0.981054	-0.921161	-0.947863	-0.225445	-0.369968	-0.0891808	-0.388005	-0.832951	-0.802449	-0.722493	-0.835461	-0.0620595	-0.532588	-0.0687021	-0.389524	4.29935	3.03778	2.32132	4.22586	5.15811	4.1644	4.46585	5.00802
ANO1	-0.1159	-0.0286759	0.427402	-0.607453	0.51694	0.24456	1.00268	-0.0204301	-0.255709	-0.475782	-0.403247	-0.522402	0.643381	-0.27957	0.314155	-0.0319184	-0.365966	-0.601379	-0.546192	-0.532339	0.936934	-0.176591	0.048395	-0.0501065
ANO10	-0.140505	0.43472	0.369397	0.102799	-0.238612	0.134546	-0.916358	-1.49454	-0.160414	0.255946	-0.213258	-0.0516999	-1.21985	-1.07939	-1.36635	-2.9222	1.43751	1.67408	1.29897	1.75936	1.26356	1.49642	0.615179	-0.175691
ANO2	-0.371318	-0.614817	0.0684444	-0.705867	0.0241292	-0.102565	0.214438	0.584527	0.140359	-0.498769	-0.405533	0.102593	0.764209	0.13086	0.242972	-0.152982	-0.406255	-0.607006	-0.482325	-0.321972	0.0455076	-0.00413425	0.90136	0.478479
ANO3	-0.35111	-0.356161	-0.341371	-0.0844823	0.299344	0.467142	0.544395	0.426205	-0.221819	-0.20806	-0.131696	-0.232833	0.590643	0.210165	0.65736	0.393741	-0.0160251	-0.233854	-0.265947	-0.166419	0.715172	0.241466	0.542268	0.442745
ANO4	-0.278544	-0.247309	-0.209477	-0.311809	0.440111	0.311491	0.429639	0.291478	-0.137721	-0.131571	-0.0109031	-0.240228	0.60344	0.127801	0.538951	0.362967	0.0415284	-0.105748	-0.0116303	-0.137567	0.604371	0.145542	0.401334	0.309155
ANO5	-0.291126	-0.278808	-0.243133	-0.261896	0.430003	0.358527	0.47738	0.333658	-0.178856	-0.144151	-0.0334169	-0.200008	0.593497	0.145847	0.547393	0.427277	0.0232465	-0.14032	0.0187443	-0.106001	0.577441	0.187321	0.433339	0.31545
ANO6	-0.2068	-0.0387382	-0.183213	-0.0260142	0.404277	-0.0506729	0.0479037	-0.013707	-0.0656472	0.106943	0.0908287	-0.0249303	0.921185	-0.189246	0.00954169	0.368332	-0.326577	-0.0209949	-0.262136	0.0350494	-0.114757	-0.676777	-0.4241	-0.491971
ANO7	0.309562	0.454795	0.330378	0.820072	-0.392898	1.54392	-0.241615	0.499279	-0.471786	-0.083266	-0.81139	-1.09396	-0.703807	0.16501	-0.285304	-0.479034	-0.170398	0.34156	0.512619	0.16165	-0.42727	0.917629	0.457882	0.151175
ANO7L1	0.297799	-0.832337	0.115235	-0.133019	0.363436	-0.702743	-0.808741	0.506418	-0.403346	-0.727646	-1.26585	0.132147	-0.806109	-0.977249	-0.549989	0.990912	1.0829	1.43853	1.66428	1.68764	2.0123	2.62277	2.36762	2.80802
ANO8	-0.311005	-0.315331	-0.272862	-0.274773	1.005	0.346771	0.477518	0.362376	-0.181897	-0.196254	-0.0788328	-0.226846	1.77616	0.178796	0.655755	0.347966	-0.0272687	-0.184706	0.0699718	-0.135059	0.54147	0.130248	0.499199	0.350925
ANO9	1.34042	1.45124	1.49726	1.31212	0.758251	0.630442	0.152953	1.22476	0.221491	-0.166605	0.20952	0.143063	-0.150607	-0.0999516	-0.379523	-0.397521	-1.02146	-0.309246	0.294826	-0.964856	-1.53245	-1.37746	-1.26256	-1.58663
ANOS1	-0.028438	-0.804429	1.26351	-0.814582	-0.256081	-0.159399	0.0161322	-0.218344	0.398222	-0.635088	-0.299665	-0.754221	0.32279	-0.392775	0.0388201	-0.294492	0.745764	-0.856902	-0.0396079	-0.340363	-0.0135754	-0.343475	0.0157143	-0.176848
ANOS2P	1.33194	-0.407918	1.5073	-1.07333	-0.361326	-0.466976	0.368557	0.264398	0.368638	-0.435768	0.322543	-0.588181	-0.193549	0.261228	0.326834	-0.488974	0.824297	-1.33889	1.15136	-0.726475	0.295016	-0.165345	-0.237978	-0.37605
ANP32A	0.210599	0.277954	0.25556	0.371906	0.455928	-0.667443	-0.600085	-0.15509	0.552843	0.533031	0.594683	0.842462	-0.24095	-0.0678919	-0.719013	-0.526159	0.18562	-0.231199	0.189	-0.463077	-0.25831	0.0148488	-0.527392	-0.754223
ANP32A-IT1	0.368626	0.415484	0.274637	0.283886	-0.435213	-0.385551	-0.327287	-0.971661	0.641388	0.728002	0.675789	0.850377	-0.406529	0.45756	0.104892	-0.000182306	-1.10633	-1.40032	-0.801661	-1.69009	-0.918378	-0.891358	-1.06476	-1.49786
ANP32B	0.346165	0.359754	0.313688	0.286022	-0.455762	-0.66233	-0.370843	-0.265346	-0.0144079	0.140323	-0.0752556	0.0819922	-0.627008	-0.729427	-0.627008	-0.512915	0.792959	0.389068	0.208597	0.66989	-0.063191	0.31702	0.453828	0.586594
ANP32C	-0.923078	1.005	-0.858736	-0.0307082	1.18102	-0.217898	0.029903	-0.204078	-0.786666	0.103511	-0.0275806	0.160336	2.50543	2.06752	1.36815	1.31542	0.250161	0.00705017	-0.756236	0.14452	2.59034	-0.345059	0.874635	1.28355
ANP32D	0.0408358	-0.200685	-0.237898	-0.0172408	0.709326	-0.442671	-0.540037	-0.593282	0.357102	0.178857	0.208633	0.485843	0.967536	-0.354165	-0.546737	-0.24991	0.425746	0.141919	0.520399	0.437857	1.69235	0.481141	0.587587	0.666484
ANP32E	-0.080953	0.125223	0.0799229	-0.181079	0.248367	-0.328707	-0.269264	-0.302287	-0.406859	-0.257046	-0.557695	-0.308075	-0.234453	-0.454193	-0.560355	-0.746387	1.27285	0.682354	0.397725	1.11545	1.57446	1.10962	1.36247	1.48409
ANPEP	1.08718	0.26488	0.345558	0.137999	-1.30476	0.974307	-2.22842	1.99396	0.335034	0.299788	0.139899	0.0666895	-0.397954	0.619705	0.0559126	1.66431	-1.08533	0.499199	1.63512	-1.35208	-2.38291	-1.02013	-2.34557	-0.972134
ANTXR1	-0.298756	-0.282111	-0.255799	-0.318769	0.332165	0.306117	0.409199	0.264274	-0.183059	-0.137647	0.0212921	-0.286583	0.466225	0.0982469	0.42873	0.260967	0.0379508	-0.14181	-0.0922092	-0.21189	0.478226	0.101551	1.11994	0.267473
ANTXR2	1.00782	1.02687	0.971025	0.81983	0.647156	0.151437	-0.438895	-0.273634	0.278377	0.0816429	0.109863	0.0575163	-0.690632	-0.36869	-0.463711	-0.741556	0.620121	0.47738	0.531814	0.54147	-0.613331	-1.03151	-0.911948	-1.02187
ANTXRL	-0.389808	-0.150736	-0.334887	-0.434058	0.24333	0.17607	0.288996	0.510975	-0.277372	-0.273389	-0.174258	-0.376312	0.350345	-0.0291312	0.387621	0.540405	-0.128083	0.0273361	0.202542	-0.320736	0.339367	0.425001	0.24985	0.139486
ANXA1	-1.05246	-0.260569	-0.975131	-0.956601	0.429311	-0.355286	-0.0835229	-0.367703	-0.914841	-0.227943	-0.748558	-0.848734	4.00658	-0.251084	3.86405	-0.394645	2.38852	7.58418	7.35898	1.9422	3.15927	1.55184	-0.161986	-0.298803
ANXA10	-0.706337	-0.215465	-0.658131	-0.329308	0.408633	0.00155495	0.162391	0.011134	-0.617848	-0.579001	0.175073	-0.51021	0.152215	0.532908	0.217733	-0.0192418	-0.520671	-0.749055	-0.652312	-0.543808	0.123748	-0.180384	0.0787312	-0.0490589
ANXA11	0.463615	0.568927	0.680388	0.259837	-0.491885	-0.673398	-0.32213	-0.268935	0.321608	0.260907	0.629143	0.117684	-0.780808	-0.71383	-0.44765	-0.817842	0.101083	0.234758	0.758155	-0.148168	-1.13257	-0.981116	-0.872608	-0.633906
ANXA13	0.500633	-0.807108	-0.779812	-0.901468	-0.107085	-0.305162	0.553973	-0.335324	-0.70024	-0.690729	-0.613953	-0.14684	0.910462	1.19462	-0.00377241	0.823445	0.590747	-0.348432	-0.840781	-0.876764	-0.0488492	-0.396034	-0.138179	0.261624
ANXA2	-0.522548	-0.447439	-0.609464	-0.259538	0.496826	-0.088284	0.111486	0.35221	-1.56193	-1.83151	-1.6236	-1.64346	-0.408021	-1.16144	-0.565373	-0.937652	1.15158	0.535575	0.404373	1.5225	1.43277	0.877463	0.733316	0.830102
ANXA2P1	-0.154463	-0.0641797	-0.287478	0.135079	1.3462	-0.420252	-0.226337	0.647233	-2.28821	-2.70821	-2.48901	-2.37539	-0.234383	-2.93065	-1.91942	-1.82881	2.16502	1.76381	1.57483	1.86417	2.14466	1.13591	1.13561	0.995593
ANXA2P3	0.247728	-0.814804	-0.804429	-0.633392	1.01204	0.0172271	0.13425	-0.0624391	-0.718937	-0.722799	-0.541818	-0.545365	0.123918	-0.195066	0.182122	-0.16359	1.26529	-0.943847	0.0227035	-0.740683	2.13878	-0.206434	0.0625613	-0.0664852
ANXA2R	0.446051	0.271707	0.13539	0.344014	0.11007	0.694603	-0.314307	-0.631715	0.634909	0.286185	0.391315	0.842754	0.25551	0.720273	-0.461247	-0.711056	-1.77096	-1.48593	-2.93603	-1.83129	-2.4121	-1.17148	-1.23867	-1.6475
ANXA3	-1.19076	-1.0092	-1.1383	-1.17829	-0.356949	-0.553048	-0.27501	-0.543295	-0.992785	-0.788853	-0.86013	-1.02979	2.79691	-0.327782	0.512942	1.75737	3.85376	2.05449	1.82734	3.95766	5.56354	3.9372	1.67681	2.23116
ANXA4	0.465395	0.0925461	0.178257	1.46759	0.98245	0.494034	1.32106	1.21958	-0.418651	0.0120455	0.257845	0.435514	-0.277523	-0.757737	0.625794	0.171833	-0.0821466	0.0152517	0.421988	-0.959242	-1.48296	-2.25745	-1.27363	-1.59539
ANXA5	-0.306751	-0.0166197	-0.0784893	-0.0358547	0.494034	-0.0973103	-0.226276	0.413399	-1.19876	-1.05409	-0.945037	-0.757218	-0.453269	-0.863797	-0.85225	-0.610748	1.82585	1.57183	1.46432	1.71342	1.74753	1.26356	1.65771	1.79063
ANXA6	0.131612	0.487239	0.0750951	0.178162	0.259402	-0.559978	-0.42807	-0.37137	-0.0337625	0.411198	-0.185624	0.158914	0.380612	-0.469748	-0.691829	-0.00484172	0.420009	0.388978	0.171622	0.346836	-0.087755	-0.0919004	-0.106671	-0.162918
ANXA7	0.150089	0.310394	0.311616	0.299152	0.668282	0.369397	0.0849524	-0.306916	-0.43231	-0.732727	-0.686571	-0.135138	-0.465682	-0.63952	-0.569804	-1.05409	0.4403	0.472887	0.275889	0.507531	-0.100896	0.00866261	0.187565	-0.14661
ANXA8L1	-1.87014	-0.634728	-1.68093	-1.63655	-0.868342	2.35447	-0.586035	0.0223537	-0.847115	0.175636	-0.539958	-0.423988	-0.239345	0.282364	-0.504944	0.320003	1.19947	1.20523	1.73831	1.33067	-0.539422	1.55986	1.33679	2.32132
ANXA9	-1.1426	-0.835393	-0.852401	-0.624512	-0.361844	-0.357099	-0.218635	0.439313	-0.847377	-0.844606	-0.640685	-0.904917	-0.18795	-0.482665	-0.167879	-0.19821	0.0179253	1.41968	0.318423	0.696462	-0.117049	0.545816	-0.130077	0.736891
AOAH	-0.370114	0.326068	-0.103383	-1.35875	0.389846	-0.700394	-0.39457	-0.721864	1.23896	-0.0388434	0.210086	0.0953322	1.03796	-0.854427	-0.326312	-0.861487	2.73728	3.47465	3.36692	1.28515	1.22264	0.762316	0.0763123	-0.585646
AOC1	-0.252287	-0.245785	-0.13481	-0.285143	0.887236	0.330294	0.448621	0.293983	-0.110609	-0.0988537	-0.0434429	-0.217525	0.789908	0.154153	0.515559	0.951913	0.0759648	-0.0938614	0.0260495	-0.100126	0.689778	1.02403	0.397401	0.320769
AOC2	0.906105	0.341509	0.562392	-0.431944	-0.552238	-0.27868	-0.342077	-0.277873	0.742616	0.364304	0.170847	-0.014268	-0.667241	-0.139596	-0.354045	-0.425533	0.124755	0.858305	0.881366	0.359854	-0.519738	-0.502367	-0.285962	-0.342003
AOC3	0.328999	-0.0547603	-1.41063	-0.426227	-2.50291	-1.61742	-1.41195	-0.660824	0.103171	0.582702	-0.0739005	0.158312	-1.55011	-0.0220114	-2.65558	0.188171	1.22809	1.50066	1.48332	1.63917	0.709626	1.13612	0.527046	2.09896
AOC4P	-0.0835229	0.946092	-1.04638	-0.0547603	-0.41813	-0.422476	-0.2095	-0.190975	-0.934845	-0.0696802	0.611082	-0.807759	-0.183323	-0.549852	-0.149658	-0.528147	-0.623941	0.563173	1.01299	0.336404	-0.178192	-0.508111	-0.242099	1.23581
AOPEP	-0.163204	0.189833	0.352112	0.339961	0.179124	-0.952126	-0.175415	-0.420973	0.447738	0.498278	0.289953	0.553712	-0.614668	0.118324	0.370746	-0.557865	-0.576378	0.121814	-0.336586	0.0324575	-0.961186	-0.655839	-0.390957	0.131236
AOX1	-0.48791	-0.416987	-0.483349	-0.320364	-0.0619192	0.0225088	0.149864	0.467499	-0.198176	-0.396445	0.190845	-0.587306	0.135913	0.406053	0.167369	-0.154882	-0.237614	-0.440648	-0.474892	0.0534086	0.114718	0.313157	0.919986	0.75044
AOX2P	-0.443523	-0.211367	-0.586649	-0.148646	0.105175	0.452903	0.187065	0.0527769	-0.424401	-0.285217	-0.425948	-0.100185	0.407198	-0.195871	0.514591	0.476049	-0.411796	-0.0653323	0.814825	-0.440596	0.29283	-0.108289	0.0966824	0.00940239
AOX3P	-0.820789	-0.822426	-0.0605993	-0.683388	-0.154463	-0.0317042	0.0693093	-0.0843575	-0.712331	0.354773	-0.604996	0.225192	0.0583072	-0.288431	0.110378	-0.176692	-0.663357	-0.933762	0.285956	-0.400095	0.0304234	-0.24321	-0.0214726	-0.0977161
AOX3P-AOX2P	-0.897206	-0.234535	-0.398191	-0.796002	0.22323	1.33435	-0.0620681	-0.315196	0.0037893	-0.725311	1.36161	-0.434021	-0.0646891	0.414462	-0.0838419	0.0972093	-0.723251	0.351216	-1.12613	-0.0348258	0.685543	0.483149	0.74489	-0.266555
AP1AR	0.417773	0.174192	0.105449	0.517651	-0.597166	0.161502	-1.13447	-0.105684	0.526935	0.304479	0.297069	0.472508	-0.449669	0.34602	-0.69561	0.549159	-0.287018	-0.570745	0.380674	0.441665	-0.761483	-0.967146	-1.28934	-0.814909
AP1B1	0.00405861	0.0442805	-0.0231637	0.0998545	-0.591156	-0.749501	-0.290032	-0.468354	0.494664	0.446966	0.215393	0.453491	-0.278253	-0.537179	-0.195725	0.131893	0.181582	-0.0148448	-0.239344	0.2599	-0.18597	0.00481698	0.145577	-0.176108
AP1B1P1	0.233286	0.263792	0.182849	-0.0410411	-0.256988	-1.29293	0.0917531	-0.934683	0.641292	0.791377	0.815318	0.533393	-0.482122	-0.0994411	0.895322	-0.112853	0.0632669	-0.00186924	-0.761114	-0.148599	-0.436386	-0.590398	-0.0736135	0.0435188
AP1G1	-0.0649951	0.315033	0.246558	0.302302	-0.692514	-0.343393	-0.123629	-0.603654	0.104034	0.522464	0.442282	0.296859	-0.697834	-0.123502	0.0849174	-0.564624	0.204395	0.267607	0.385905	0.54391	-0.534697	-0.532399	-0.251508	-0.520725
AP1G2	0.440065	0.541291	0.388833	0.571603	-0.25072	-0.348898	-0.247088	0.869931	0.317373	0.620998	0.47102	0.55048	-0.31535	-0.163149	-0.302738	0.757942	0.158066	0.132668	0.278814	0.110187	-0.941272	-0.734985	-0.869209	-0.418746
AP1M1	0.058843	0.0798754	1.12922e-05	0.290166	0.109502	-0.299674	-0.0184549	-0.0209633	0.182047	0.033092	0.0662991	0.229913	-0.0818216	-0.382096	-0.293299	-0.445028	0.220132	0.0869777	0.166401	0.320769	-0.279761	-0.180986	-0.202217	-0.177449
AP1M2	-0.736395	0.738767	-0.690831	-0.206391	-0.150279	-0.245528	-0.0237402	0.801449	-0.637706	0.0324917	-0.535343	-0.740032	-0.00223166	0.278181	1.20312	-0.289157	-0.569518	-0.00488137	-0.714698	0.174839	0.0418652	0.352353	-0.0644566	-0.24119
AP1S1	0.591203	0.260388	0.563812	0.22494	-0.51876	-0.350283	0.233087	-0.849033	-0.880063	0.100133	0.16509	0.201853	-0.313183	-0.291636	0.103602	0.489621	0.531642	0.336696	0.127987	0.269564	-0.111423	-0.186942	1.24979	0.752727
AP1S2	0.0495692	0.160847	0.0832452	0.716632	0.642032	-0.191036	0.286617	0.589029	-0.113512	0.167851	0.000610373	0.28799	0.238397	-0.476547	-0.13391	-0.501302	0.182205	0.308727	0.27894	0.163771	-0.071938	0.590174	-0.556181	-0.421739
AP1S3	2.41311	2.13829	2.16569	1.36857	0.977705	0.988073	1.01607	-0.265305	0.705352	-0.24597	-1.01189	-1.17925	0.327969	0.0312182	0.868489	-0.718119	-0.811104	0.276014	-0.094544	-0.956019	-1.08977	-1.0235	-0.622176	-1.20823
AP2A1	0.36806	0.199212	0.0350063	0.257126	-0.554939	-0.808491	-0.460055	-0.0459839	0.042978	-0.0724918	-0.306673	0.264036	-0.427724	-0.604075	-0.658491	-0.743831	1.04852	0.743015	0.847467	0.942307	-0.0404196	0.427568	0.20926	0.226405
AP2A2	0.355809	0.600259	0.528668	0.377707	-0.391215	-0.530992	-0.179673	0.0984957	0.299703	0.628751	0.589586	0.465972	-0.631583	-0.426313	-0.331386	-0.181353	-0.4958	0.130301	-0.0341119	-0.304692	-0.962042	-1.04441	-1.00983	-1.14588
AP2B1	0.406948	0.393178	0.574357	0.32679	-0.276926	-0.372727	-0.139353	-0.770186	-0.0173755	0.236325	0.313	0.482203	-0.172999	0.119949	-0.124871	0.492431	-0.719194	-1.45852	-0.804984	-0.70828	-0.775755	-1.39201	-0.537114	-0.838203
AP2M1	-0.185492	-0.0459256	-0.148246	-0.0249043	-0.29757	0.0758809	0.490553	-0.0053879	0.00195799	0.0569097	0.0834505	0.0702313	-0.504259	-0.184734	-0.225782	-0.345592	0.581319	0.524848	0.356905	0.591248	0.175766	0.681281	0.910259	0.718543
AP2S1	-0.11876	-0.204994	-0.119273	-0.145251	-0.153334	0.813094	0.823484	0.272936	-0.630812	-1.01048	-0.972168	-0.41256	-0.584307	-0.205608	-0.268625	-0.606459	0.89076	0.732119	0.248615	0.589566	0.0638124	0.892021	1.17888	0.791029
AP3B1	-0.201418	-0.385959	-0.248971	-0.483451	-0.573005	-1.14068	-0.746399	-0.844709	0.189898	0.339692	0.420439	0.399793	0.13644	-0.071545	-0.21591	-0.109255	0.0957759	0.0901761	0.340372	0.212554	-0.0858754	-0.0893707	-0.205697	0.0214337
AP3B2	-0.514837	-0.751731	0.217607	0.168048	0.00684464	-0.0541203	0.123282	0.845543	-0.658013	-0.629108	-0.534874	1.06559	0.118645	-0.31477	0.18028	-0.0752556	-0.600841	-0.822298	-0.618093	-0.572471	0.0640992	-0.215327	0.0350149	-0.0939025
AP3D1	0.0893033	0.0301747	0.038207	0.27886	-0.805083	-0.996306	-0.559522	0.272592	0.198634	0.109863	0.162143	0.225612	-0.792385	-1.09584	-0.774041	0.0877139	1.845	1.69574	1.55876	1.87953	1.1303	0.920669	1.10941	1.68607
AP3M1	-0.0503849	-0.0784442	-0.376031	-0.0310196	-0.150736	-0.619331	-0.364168	-0.272526	-0.0105864	-0.0173755	-0.457205	0.0698459	-0.0875474	-0.446795	-0.448271	0.086179	0.513727	0.500575	0.456468	0.613668	0.18683	-0.110907	0.0217567	0.426939
AP3M2	0.35858	0.667446	0.460266	0.689745	0.338608	0.0974486	-0.127546	-0.200964	-0.151024	0.437571	0.341518	0.234853	-0.538207	-0.307162	-0.19898	-0.678375	-0.805727	-0.0428458	-0.190548	-0.131011	-0.297145	-0.366251	-0.655839	-0.641168
AP3S1	-0.0625297	0.139334	0.255277	0.218385	0.410068	0.14557	0.00939464	-0.553933	-0.472046	-0.356288	-0.647995	-0.122802	-0.190251	-0.671093	-0.258838	-1.22524	0.319164	0.39467	0.257215	0.560882	-0.0461003	0.00154233	0.138667	-0.189213
AP3S2	-0.00595362	0.135333	-0.119137	0.0668684	-0.52563	-0.0370857	-0.308852	-0.120836	0.119112	0.0297536	-0.127521	0.208139	-0.481336	-0.241464	-0.544582	-0.206471	1.08158	1.01282	0.581503	1.35097	0.524185	0.921053	0.67716	0.873493
AP4B1	0.075783	0.186906	-0.0394959	-0.00219584	-0.89517	-1.21002	-0.629621	0.233349	0.110766	0.514805	0.333201	0.293806	-0.693067	-1.04111	-0.237935	0.316778	0.518413	0.163699	0.4619	0.550744	-0.202935	-0.325857	-0.539219	-0.111941
AP4E1	0.148673	0.0437954	0.190481	0.276134	-0.0656931	-0.351204	-0.579215	0.056023	0.259125	0.220114	0.316136	0.40423	-0.116472	-0.38736	-0.513907	0.0937203	-0.0834526	0.0176873	0.174512	0.417717	-0.235228	-0.391066	-0.33311	-0.311969
AP4M1	0.305645	-0.0534127	0.14921	0.53907	-0.464347	-0.673071	-0.0625871	0.211111	0.191575	0.0235912	-0.133827	0.241728	-1.11635	-0.957302	-0.756726	-0.437317	0.644997	0.974093	0.211823	0.772656	-0.383043	-0.270533	-0.376989	-0.140691
AP4S1	-0.167932	-0.0660962	-0.053271	0.0418286	1.47027	-0.158698	-0.399048	0.518335	0.288109	0.0604418	0.436681	0.114986	0.974969	-0.0319184	0.223329	0.535444	-0.136611	-0.477424	-0.458589	-0.00411213	0.420157	-0.635649	-0.563413	-0.0178015
AP5B1	0.838341	0.644958	0.682796	0.817518	-0.475203	0.459985	-0.150035	-0.387538	1.00378	0.568184	0.791678	0.810572	-1.94643	0.59591	-0.68973	-0.0454887	0.152849	0.0380087	-2.20975	-1.79083	-1.68344	-0.658192	-1.10538	-1.87506
AP5M1	0.083089	0.095968	-0.0727764	0.393945	0.184203	-0.363065	-0.450414	-0.0323065	-0.0120946	0.0302533	-0.183059	0.117229	-0.275442	-0.75273	-0.449669	-0.33841	0.679132	0.531814	0.571653	0.8283	0.289775	0.223402	-0.156785	0.309812
AP5S1	-0.262728	-0.00105762	-0.110137	-0.332086	-0.21343	-0.188824	0.227149	-0.5073	0.00419739	0.198634	0.0381209	-0.143133	-0.45967	-0.322603	0.113491	-0.634108	1.491	1.34295	1.37211	1.21218	1.02847	1.0609	1.64424	0.79021
AP5Z1	-0.0373543	-0.10463	-0.114272	0.094896	-0.0109179	-0.0483041	-0.289638	0.155227	0.151022	0.033947	-0.110769	0.26973	-0.212315	-0.0840384	-0.37436	-0.17435	0.388354	0.449295	0.150244	0.385591	-0.332954	-0.0138704	-0.205555	-0.175849
APAF1	0.910587	0.0052406	0.399083	0.883682	0.529497	0.315573	-0.57591	0.114878	0.375951	0.189222	0.0461504	0.52337	-0.0077761	0.0167147	-0.273111	0.416863	-1.0434	-0.574776	-1.41298	-0.660722	-1.10043	-1.6866	-1.48163	-1.21557
APBA1	-0.836244	-1.00266	-1.30993	-0.318866	1.21565	-0.082987	-0.280544	0.160521	-1.15044	0.00255361	-1.16994	-0.392252	0.207096	0.504175	1.06941	0.260511	-0.363877	-2.00633	0.00535077	0.308875	1.2043	0.247284	-0.135458	-0.0867971
APBA2	-0.895375	-0.88905	-0.843697	-0.826415	-0.151546	-0.233162	0.00384284	-0.258588	-0.780925	-0.751341	-0.366255	-0.725311	0.00702148	0.0456614	0.0462659	-0.271935	0.161806	2.76737	1.74148	-0.823678	0.989408	0.460999	1.12973	0.666716
APBA3	0.0607462	0.055094	-0.036211	0.0606284	-0.328176	-0.229655	-0.236892	0.330536	0.250767	0.159153	0.277085	0.427174	-0.319219	-0.0672723	-0.603779	0.228475	0.327349	0.357054	-0.351989	0.265679	-0.359147	0.0230977	-0.573836	-0.153999
APBB1	1.00743	1.26278	0.241702	0.347849	-0.514903	-0.612459	-0.698666	-0.809848	1.97843	2.30317	2.11708	2.17275	1.23312	0.48692	-0.174258	0.131762	-1.4082	-1.79083	-0.10752	-1.87277	-1.05838	-1.10482	-0.704716	-1.03663
APBB1IP	0.920435	0.34176	0.441817	0.787342	0.569219	0.230718	-0.24998	-0.139065	0.428136	0.0313884	-0.124135	0.305494	-0.0730852	-0.112853	-0.281479	-0.643499	0.378957	0.0722923	0.335424	0.166169	-0.505711	-0.771999	-1.39946	-1.52516
APBB2	-1.31136	-0.978991	-0.883772	-1.33708	-0.0878374	-0.463137	-0.512834	-0.675922	1.18446	2.59624	1.92494	1.61703	-0.269703	0.478245	1.63275	0.485843	-0.902329	-0.310063	2.12397	-0.467963	-0.0930026	-0.0165523	-0.10748	-0.424244
APBB3	0.364604	0.247024	0.0869232	0.312967	-0.749661	-0.523725	-0.749501	0.412082	0.224375	0.30964	0.195489	0.438077	-0.135903	-0.52732	-0.530985	0.69917	0.35152	0.164414	0.088107	0.298974	-0.644596	-0.398968	-0.724293	0.11999
APC	0.387773	0.479359	0.385021	0.264552	-0.075337	-0.518383	-0.442746	-0.885142	0.588771	0.784436	0.732675	0.729176	0.263301	0.291413	-0.19206	-0.430514	-0.502488	-0.910676	-0.337996	-0.569866	-0.400459	-0.696301	-0.603735	-0.796859
APC2	0.754136	0.338396	1.56233	0.425596	-0.836391	0.573419	-0.793704	-0.579055	1.42707	0.354236	0.858657	0.413737	-0.495914	0.293998	0.692984	0.885379	-1.22023	-0.811199	-0.30292	-0.357812	-0.87119	-1.09245	-0.453704	-1.19266
APCDD1	-0.941716	-0.462756	-0.901963	-0.776002	-0.306649	-0.147363	0.0307063	-0.185759	1.71044	1.84938	1.01484	1.60082	0.00357369	0.951013	2.22385	2.47723	-0.68042	0.338949	1.41119	0.119794	-0.00870971	-0.337496	-0.0632371	0.476961
APCDD1L	-0.391129	-0.375833	-0.352232	-0.227869	0.264307	0.436104	1.055	0.41081	-0.261298	-0.283512	-0.133872	-0.207477	0.545745	0.211471	0.702738	0.399709	-0.111706	-0.28712	-0.0220401	-0.137977	0.641337	0.186242	0.557984	0.433339
APCDD1L-DT	-1.66821	-0.265305	0.519453	-0.696223	-0.724816	-0.784705	0.727871	0.444857	0.317089	0.2532	0.366594	0.360471	-0.487482	-0.926933	-0.324443	-0.891652	0.636635	0.30561	1.34717	0.116186	-0.408842	0.72035	-0.416222	0.31071
APCS	-0.353874	-0.649181	-0.541656	0.0137475	-0.165581	0.337431	-1.0536	0.48322	-0.282909	-0.691516	0.0741723	-0.559516	-0.249399	0.868028	0.492073	0.237311	0.21355	0.449167	-0.45063	0.255003	0.716145	0.980026	1.10478	0.780309
APEH	0.0556357	0.00126341	-0.0384173	0.240533	-0.0990768	-0.722342	-0.456671	0.132377	-0.0245679	-0.279219	-0.292536	0.102923	-0.256944	-1.25322	-1.02869	-0.22121	1.15463	0.890244	0.788041	1.18715	0.891837	0.331282	0.849334	0.722638
APEX1	0.585773	0.393243	0.188832	0.54349	-0.240388	-0.910494	-0.938395	-0.348557	0.24041	0.374706	0.129885	0.496857	-0.18653	-1.33715	-0.922556	-0.385033	0.419313	0.276145	0.237089	0.529039	-0.365135	-0.69507	-0.481238	-0.204477
APEX2	-0.0831709	-0.409305	-0.765621	-0.0424807	-0.175164	-0.026319	-0.288398	-0.278808	0.0879747	-0.433741	-0.426313	0.246217	-0.351143	-0.131696	-0.676049	-0.517746	0.86277	0.43326	0.157573	0.648074	1.07709	1.24828	1.14354	1.43796
APH1A	0.155562	0.152809	0.310044	-0.0842045	-0.557056	-0.684379	-0.155382	-0.82501	0.213743	0.39482	0.409177	0.136044	-0.380577	-0.78941	-0.0925546	0.0999652	0.625076	0.308784	0.458761	0.688453	-0.202301	-0.480977	-0.231925	0.686462
APH1B	-0.0812877	0.165078	0.193876	-0.143777	-0.453552	-0.148683	0.542097	-0.660244	-0.0650262	0.188028	0.176773	-0.0829729	-0.583685	-0.388607	0.07357	-0.903274	0.911915	0.507953	0.73927	0.889721	-0.253864	-0.0748902	0.92713	-0.29202
API5	0.0887018	-0.091188	-0.127669	0.005938	-0.154373	-1.02147	-0.640871	-0.552918	0.0799792	0.196617	0.125863	0.119727	0.0115505	-0.502867	-0.471464	-0.407214	0.678605	0.437514	0.491868	0.753865	0.860137	0.148	0.318423	0.694578
APIP	-0.326717	-0.378814	-0.47692	0.236297	0.974307	-0.488723	-0.984169	-0.636281	-0.266736	-0.0303706	-0.306879	0.37083	0.547225	0.143529	-0.423823	-0.242863	0.271116	0.248615	0.167876	0.341035	0.88847	0.510016	0.112447	1.0423
APLF	-0.399357	-0.351947	-0.285248	-0.444096	0.198551	0.187482	0.682075	0.146814	-0.310607	-0.286373	-0.196468	-0.392775	0.296153	-0.0658075	0.302769	0.155577	-0.120368	-0.316719	0.263362	-0.35136	0.304317	-0.0303185	1.07291	0.101965
APLN	-0.069273	-0.0720585	-0.256437	-0.117295	0.17398	0.304293	0.277845	0.24583	-0.11169	-0.104644	-0.00984681	-0.292016	0.29691	0.411198	0.318798	0.143267	-0.18168	-0.0809432	-0.270568	-0.0159391	0.29848	0.0250663	0.208794	0.0989195
APLNR	0.0881294	-1.42691	0.361607	-1.19954	-0.583185	-0.173984	1.4891	1.18063	0.785751	-0.82021	-0.718407	-0.280759	0.320035	-0.683732	1.61509	0.653368	-1.17376	-0.403642	-1.53331	-1.27859	0.539731	1.55246	0.0419877	1.48946
APLP1	0.599241	0.560615	0.330536	-0.992957	0.266989	0.470424	-0.416239	-0.589125	-0.123742	0.0306621	0.249173	-0.879843	-0.12561	0.883103	-0.864863	-0.414678	-1.51906	0.472986	-2.44106	0.02185	-0.41412	0.71704	0.011176	0.477558
APLP2	0.146024	0.339114	0.640593	0.160143	-1.01983	-0.579821	-0.892664	-0.859474	2.8052	3.44482	3.17573	3.31014	2.16444	2.30767	1.44073	2.14875	-0.815572	0.351575	2.04284	0.0891955	-0.934016	-0.956895	-0.646706	-0.706954
APMAP	0.119064	-0.372987	-0.0689412	0.282675	-0.126254	-2.09921	-1.55133	-0.543896	-0.245547	-0.323858	-0.223888	0.164094	0.289706	-2.08957	-2.46965	-0.0322068	1.35377	1.44132	1.02607	1.93354	1.72413	0.669207	0.521304	1.19474
APOA1	0.0733638	-0.0112373	-0.145552	-0.309629	0.274159	0.443009	0.114878	0.164291	0.112084	0.164435	-0.35157	-0.0737726	0.18386	0.314979	-0.310447	0.528681	0.147259	0.0574635	0.0829393	-0.000390283	-0.132108	0.139486	0.324446	0.18562
APOA2	-0.294075	-0.308176	-0.281294	-0.287553	0.377214	0.37322	0.390467	0.30294	-0.176965	-0.184404	-0.12848	-0.238463	0.516517	0.207972	0.460899	0.905747	0.00314917	-0.177026	-0.119154	-0.133289	0.52825	0.62542	0.354545	0.301657
APOA4	-0.509107	0.4812	-0.50656	-0.535723	0.256926	0.501328	0.189632	0.444556	-0.39184	-0.388317	-0.363797	-0.451789	0.290849	-0.226203	0.199728	0.0504898	-0.281744	-0.47313	-0.33339	-0.387395	0.878654	-0.0942211	0.0698801	-0.00382139
APOA5	-0.0566868	0.111486	-0.33901	-1.07978	-0.468389	0.694094	-0.17684	0.969865	-0.90945	-0.847256	0.665159	-1.01517	-0.193872	0.45162	-0.167448	1.26074	-0.878661	0.121262	-1.33234	-1.21674	-0.189213	0.566777	1.6554	1.09947
APOB	-0.434058	-0.372142	0.0505206	-0.266694	0.130861	0.171603	0.303274	0.31517	-0.295399	-0.341381	0.0117276	-0.303661	0.277281	0.383495	0.623695	0.505419	-0.135838	-0.231029	-0.19158	-0.154978	0.300215	0.0591871	0.261059	0.267025
APOBEC1	-0.357529	-0.343316	-0.318451	-0.24242	0.377558	0.417518	0.484142	0.36904	-0.266413	-0.254663	-0.144932	-0.192861	0.545071	0.219674	0.577823	0.601646	-0.0980021	-0.244449	-0.208272	-0.0884976	0.603657	0.23117	0.448433	0.402285
APOBEC2	0.255995	-0.833414	-0.820789	-0.103166	-0.183418	0.198937	0.129848	-0.0519514	-0.737126	-0.237219	-0.387428	0.134999	0.102923	-0.231167	0.18712	-0.159451	-0.710191	-0.969315	0.222296	0.744662	0.112311	-0.215033	0.0629549	0.716861
APOBEC3A	-0.692095	-0.835906	-0.809329	-0.62461	-0.203813	0.00335835	0.134604	-0.0151684	-0.732589	-0.737418	-0.576598	-0.578095	0.0865408	-0.26021	1.63038	-0.126777	-0.716705	1.22645	2.01679	-0.676631	0.0703703	-0.22237	0.923072	-0.000915887
APOBEC3B	-0.631322	0.607797	0.0874322	-0.368251	-0.372024	-0.558177	-0.282672	1.30299	-2.9956	-2.02183	-1.4779	-1.53662	-0.629047	-0.395787	-0.687824	0.732675	5.54104	6.05973	5.74525	6.45677	5.86997	6.47666	5.0427	7.35898
APOBEC3C	-0.17754	-0.179673	-0.174973	-0.0155736	-0.0412458	-0.513909	-0.59077	-0.636681	0.229095	0.0266559	0.0997521	0.318059	0.206876	-0.142749	-0.754319	-0.33971	0.976829	1.41912	0.781292	1.62269	1.41779	1.13954	0.583721	0.807184
APOBEC3F	-0.276168	-0.176693	-0.253932	-0.200964	-0.435287	-0.251906	-0.45242	-0.374968	0.0703084	-0.210404	0.0684784	0.119332	-0.214298	-0.13517	-0.648935	-0.317892	0.966415	1.45242	1.01188	1.58873	1.06279	1.21109	0.439058	0.917824
APOBEC3G	-0.0974095	-0.0392677	-0.177697	0.247356	-0.480934	-0.750267	-0.931388	0.707428	-0.0680507	-0.361077	-0.280231	0.195984	-0.169106	-0.975816	-1.72254	0.696972	1.87387	2.40916	1.8492	2.49525	1.60312	1.11341	0.652899	1.90163
APOBEC3H	-0.99206	-1.67725	-0.444468	0.197945	0.607541	0.430047	-0.763794	0.845324	-3.09461	-1.99197	-2.4115	-1.70948	-0.506401	-1.76283	-0.810338	-1.9799	1.65054	2.47191	2.30291	3.13237	2.00715	1.95713	1.46432	2.06174
APOBEC4	-0.598745	-0.848408	-0.336931	-0.843009	-0.138937	-0.247542	0.283921	-0.284645	-0.105714	-0.241358	-0.629542	-0.73634	0.00686008	-0.434112	0.0107155	0.635072	-0.275775	0.633095	0.299381	-0.815384	-0.0296142	0.678972	0.459325	-0.194579
APOBR	0.0321806	-0.230556	-1.02147	-1.05583	-0.739487	-0.440072	-0.637991	-0.470204	0.224002	0.389031	-0.161389	0.375627	-0.416918	-0.123742	-0.29795	-0.631422	3.03778	2.82832	2.56029	2.59446	2.0155	2.21406	-0.118002	0.063769
APOC1	-0.501229	1.9552	-0.470915	-0.665617	-0.0524373	0.00885661	2.0102	1.14288	-0.41136	-0.395078	1.17414	-0.609626	0.105837	-0.261755	0.122102	-0.149243	-0.229293	-0.466542	-0.534443	-0.663585	0.0676081	-0.24277	2.07241	-0.0967646
APOC2	-0.704155	-0.631801	-0.665967	-0.217344	0.0125353	0.249898	0.278141	0.115637	-0.531451	-0.570068	-0.375882	0.18386	0.26989	-0.0648648	0.294725	0.0826163	-0.444459	0.10459	-0.592522	-0.507894	0.340578	-0.0482407	0.204395	0.809171
APOC3	-0.613732	-0.643236	-0.605903	-0.683951	0.0803482	-0.0661537	0.0640759	-0.145787	-0.509019	0.396807	-0.469218	-0.602179	0.142603	0.668759	0.0698997	-0.158802	-0.416893	-0.63928	-0.57566	-0.591554	0.0628937	-0.233026	-0.0629846	-0.129415
APOC4	-0.084032	0.247893	-0.273871	-0.297035	-0.701339	2.2794	0.0653649	1.03699	0.148722	0.0870697	0.211025	-0.218151	-1.43122	0.515237	-0.370575	-0.117768	0.972971	0.252127	-0.935484	0.488756	-0.988995	0.838255	0.49864	0.821568
APOD	1.39962	-0.642762	-0.626929	-0.703641	0.153372	-0.0226482	1.48263	0.0531418	-0.51669	0.452763	-0.487662	-0.604333	0.184902	-0.335554	0.874866	-0.146592	-0.195036	0.0863523	-0.28799	-0.578166	0.109923	-0.245108	-0.043174	-0.123477
APOE	0.963846	0.662127	0.703646	-0.0432322	-0.789336	0.799565	-0.321512	0.097975	0.515237	0.188619	-0.188506	-0.154086	-0.652741	0.724218	-0.459863	-0.318513	0.185834	0.0330119	-0.0130743	-0.0587383	0.600655	0.407325	-0.00814683	0.205498
APOF	-0.788883	-0.777838	-0.013405	-0.573894	-0.132478	0.0500883	0.175228	0.0496754	0.214	-0.67205	-0.533353	-0.228671	0.297342	-0.23632	0.246217	-0.0542243	-0.636571	-0.871748	0.964207	-0.569627	0.114852	-0.189308	0.745037	-0.00149619
APOH	-0.483451	-0.20035	0.218098	-0.50947	0.225283	0.103702	0.222615	0.0658362	-0.11354	-0.40259	-0.331106	-0.425581	0.287094	-0.165244	0.243293	0.106943	-0.288436	-0.45801	-0.4061	-0.36973	0.279866	-0.0677251	0.119218	0.0613487
APOL1	-0.0578219	-0.0053879	-0.17007	0.397907	-0.366786	0.615339	-0.510269	0.691632	-0.642383	-0.797422	-0.94125	-0.151835	-0.438375	-0.210125	-0.819612	-0.13049	1.67825	1.92225	1.43277	2.03957	1.23166	1.93698	1.69837	1.72876
APOL2	0.0680387	0.0899576	-0.0644458	0.344483	-0.213198	0.486205	-0.38873	0.376001	-0.567475	-0.796888	-0.887913	-0.151355	-0.510537	-0.162089	-0.758591	-0.435264	0.762962	0.817952	0.533506	1.07678	0.866821	1.26637	1.18743	1.26842
APOL3	0.148315	0.367027	0.231968	0.630718	-0.66928	0.347413	-0.340715	0.209339	-0.83859	0.100892	-0.358124	0.0931713	-0.202784	0.0936297	-0.633826	-0.968047	0.267387	0.86868	0.0925824	0.709757	1.08323	0.933598	-0.200774	0.482199
APOL4	-0.0780068	0.273494	-0.134243	0.747055	0.444857	0.192346	-0.15509	-0.375719	-0.215455	0.158871	-0.428439	-0.0708917	0.309551	-0.0942768	-0.239606	0.309684	-0.0416358	0.402664	-0.037173	0.1731	0.348785	0.517852	-0.300971	-0.0283123
APOL5	0.688554	0.252849	0.979192	0.150942	-0.790015	-0.853978	0.633927	0.199142	0.187074	0.680183	-1.15841	0.267536	-0.380255	-0.365316	-0.375318	-1.01098	-1.1439	0.878654	1.9422	0.535042	1.09457	-0.548721	-0.463513	0.83339
APOL6	-0.175669	-0.271132	-0.358984	-0.0243382	-0.591734	0.851733	0.637354	0.834814	-1.33885	-1.06822	-1.30765	-0.871843	-0.902383	0.388768	-0.142781	1.07056	-0.441464	0.232295	0.27947	0.29326	-0.237008	0.460678	1.14421	0.930008
APOLD1	0.0568602	0.205254	0.194457	-0.255188	-0.724216	-0.548188	-0.427974	-0.546077	0.090259	0.566159	0.619705	0.241066	-1.12961	-0.411277	-0.176055	-0.388853	0.639001	0.367909	-0.026657	0.429762	0.331056	0.432629	-0.35068	-0.241465
APOM	-0.116987	-0.0581808	0.192123	-0.0928513	-0.792145	-0.351624	0.044732	-0.926377	0.000673518	0.161168	0.274535	-0.0284696	-1.19461	-0.9416	-0.0793645	-1.166	1.23879	0.984785	0.983742	1.04157	-0.0986877	0.878043	1.40972	0.218714
APOO	0.263181	0.209293	0.393067	0.246952	-0.42849	-0.149144	-0.530613	-0.519811	-0.0864003	-0.236004	-0.0941549	-0.0662964	-0.662554	-0.758591	-1.23778	-0.813544	1.37738	0.889721	0.95459	1.28133	1.30418	1.23166	1.33469	1.65005
APOOL	-0.165515	-0.00322718	-0.0334574	-0.0724053	-0.0690667	-0.0535171	-0.271874	-0.733701	-0.0550402	-0.0226636	-0.204559	-0.077714	-0.425008	-0.0198155	-0.319411	-0.453943	1.06457	0.654778	0.337826	0.604371	0.666716	0.803933	1.24006	0.867434
APOOP5	0.274	-1.00844	-0.464996	0.92225	-0.297468	-0.199256	-0.0119416	0.325387	0.107256	-0.836708	0.44004	-0.751526	0.534511	0.367521	0.0132311	-0.30341	-0.844474	-0.433983	-1.25023	-0.393927	-0.0614126	-0.352449	-0.111105	-0.184995
APP	1.24797	0.908265	1.49042	0.534314	-1.45238	-0.43222	-2.02991	-0.875964	1.46596	1.79144	1.59741	1.67817	-0.220683	1.02805	0.860136	0.808853	-1.81372	0.088107	0.0254265	-1.55127	-0.724672	-1.02548	-2.30847	-0.490706
APPBP2	0.561184	0.0669728	0.303873	0.505714	0.0720956	0.246875	-1.13043	-0.425287	0.980497	0.436681	0.670965	0.958717	0.00275599	0.324287	-0.769381	0.148857	-0.453891	-0.580122	0.036717	0.132992	-0.761644	-0.755648	-1.38925	-0.933076
APPL1	0.909142	0.622428	0.983136	0.928733	-0.631626	0.361438	-0.651855	-0.933165	1.36746	1.29101	1.33812	1.64751	-0.285086	0.479547	-0.302104	-0.753013	-0.667133	-0.018925	0.33793	0.0287621	-1.3626	-1.2869	-1.1291	-1.56973
APPL2	0.245534	-0.00951095	-0.0973758	0.173257	-0.540534	-0.977833	-0.500592	-1.00666	0.972749	0.730342	0.489706	0.762814	0.635933	-0.0694703	0.10323	-0.444919	0.517003	0.322103	0.937194	0.565663	-0.288355	-0.823257	-0.69507	-0.878044
APRT	0.220542	0.227581	0.323468	0.00126341	-0.438958	0.000105514	0.049041	-0.78721	0.211308	0.187662	0.31719	0.0792146	-0.527689	-0.385327	-0.343572	-0.929546	0.565234	0.3661	0.0363585	0.327501	-0.264823	0.28511	0.657627	-0.270533
APTX	-0.0506729	-0.0143394	-0.174542	-0.0787229	-0.427454	-0.550093	-0.414859	-0.347632	-0.0208396	-0.0184938	-0.197272	-0.0240851	-0.613068	-0.343875	-0.325851	-0.482447	0.897002	0.677415	0.5836	0.801021	0.410592	0.613817	0.909845	0.712538
AQP1	0.225036	0.197945	-0.558994	0.00505567	-0.4402	0.34749	-0.272668	-0.636082	0.0602786	0.0811588	-0.590005	-0.342444	-0.441688	0.0419116	0.019533	-0.907597	1.49053	1.6011	0.718353	1.14728	0.146089	1.54853	1.18654	0.858029
AQP10	-1.46813	0.0115241	-1.19954	-1.24166	-0.571822	0.368654	-0.288757	0.0156296	0.437862	-1.18521	-0.9416	-1.166	2.40504	-0.641742	-0.225445	-0.725863	1.06888	-1.27697	0.588579	0.223642	1.60644	0.000834321	1.53131	0.537128
AQP11	-0.199741	0.434213	-1.0179	-0.0153067	-1.24036	-0.318451	0.0484771	-0.211147	0.142021	-0.0206873	-0.677061	0.199952	-0.0544685	-0.536648	-0.292341	-2.12968	1.07424	0.360053	-0.728792	1.05121	1.1255	0.624425	-0.793846	0.64671
AQP12B	-0.384542	-0.42092	-0.369637	-0.388781	0.230158	0.247024	0.285225	0.517295	-0.286997	-0.284538	-0.0459471	-0.34594	0.348643	1.07775	0.335628	0.187845	-0.127653	-0.314339	-0.253434	0.0801532	0.346836	0.0433468	0.615039	1.29499
AQP2	-0.342196	-0.575169	-0.536287	-0.653838	0.258173	-0.0608559	0.110949	-0.0421578	-0.477204	-0.479526	-0.291875	-0.628852	0.106381	-0.278498	0.171895	-0.186707	0.332458	-0.54425	0.281491	-0.710023	1.2409	0.670865	0.0246752	-0.0908072
AQP3	0.176909	0.623853	0.0222576	1.10545	-0.710522	-0.398108	-1.05328	-0.72913	-2.66157	-2.4853	-2.209	-2.0505	-1.71736	-2.15159	-1.8648	0.333145	8.06222	7.43354	6.66964	7.73434	7.21778	6.71776	6.28906	6.18146
AQP4	-0.682063	0.221898	0.051403	0.0235908	0.0226762	0.178858	0.0493631	-0.200086	-0.0572025	-0.427254	-0.483747	-0.0805925	0.635072	0.190481	0.0967685	0.58907	-0.501293	-0.0863204	-0.575564	-0.630201	0.0315694	0.119548	-0.0559645	0.65562
AQP4-AS1	-0.441413	-0.478755	-0.402871	-0.557534	0.0645714	0.108485	0.181965	0.0325429	-0.351641	-0.333512	-0.236282	-0.497798	0.187585	-0.170294	0.186002	0.00361088	-0.16953	4.15096	-0.39141	-0.503651	0.161564	-0.142191	0.0692904	-0.0170509
AQP5	0.0683344	-0.0393658	0.259018	-0.152643	0.0706969	0.211479	0.055839	-0.493968	-0.636927	-0.0407827	0.165291	-0.164531	-0.252349	0.734613	-0.195439	-0.839315	0.222827	0.0306994	-1.0256	0.301871	0.0162371	0.870957	0.8695	0.567868
AQP6	-0.57111	-0.588305	0.0977311	-0.330295	0.0727355	0.00260703	0.129407	-0.0334226	-0.472329	-0.456431	0.577823	-0.521935	0.171553	-0.244926	0.147111	-0.0552313	-0.35437	-0.5566	-0.407775	0.32564	0.0965748	-0.191115	0.645957	0.0475253
AQP7	-1.06312	-0.237016	-0.603741	-0.235973	-0.673071	-0.298392	0.60865	-0.369408	-0.8465	0.269842	-0.270525	-1.03174	-0.197324	2.76533	-0.308843	0.229913	1.23941	1.02815	-0.744024	0.163804	-0.230311	1.01215	-0.142265	-0.346826
AQP7P1	-0.106652	0.445606	-0.737035	-0.91086	-0.977402	-1.15662	-0.948558	-0.393619	0.406518	0.548283	-1.80164	-1.05725	-1.16428	-1.00429	-0.970012	0.133737	3.24472	2.55445	0.256717	1.32717	0.536473	1.22437	-0.362763	1.51635
AQP7P3	0.679049	-0.0643577	-2.3371	-0.753263	-0.279091	-0.604177	-1.08229	0.546257	0.618867	0.0673105	-3.57505	-1.50533	-1.9799	-0.887913	-0.694315	-0.00443239	3.51188	2.33204	0.164414	1.48079	1.0837	1.95669	-0.197298	1.66877
AQP8	0.713634	0.403731	0.458635	-0.0591636	-0.555231	-0.659206	0.276755	-0.656535	-0.296543	-0.0399014	0.494664	0.0264494	-0.333692	0.611652	-0.23136	0.516517	0.335608	-0.1697	0.403203	-0.150715	-0.305721	0.864171	0.140924	-0.380146
AQP9	-0.992755	-0.470747	-0.751731	-0.912523	0.0131959	-0.271605	0.0147892	-0.00393012	-0.840619	-0.752628	-0.675978	-0.753681	-0.0948207	-0.350227	1.43349	-0.299882	-0.569284	0.878043	1.97556	-0.454268	-0.116138	-0.0773682	-0.140007	-0.169254
AQR	0.146972	0.214175	0.273161	0.484418	0.171123	-0.516815	-0.766336	-0.0532363	0.206408	0.353763	0.369287	0.5831	-0.0678419	-0.537261	-0.690879	0.181874	-0.115743	-0.0369469	0.0955691	0.152977	-0.305642	-0.599865	-0.682024	-0.302561
AR	-0.472372	-0.354246	-0.42849	-0.25388	0.168194	0.181672	0.259441	0.280636	-0.327722	-0.356961	-0.282741	-0.367723	0.361624	-0.0430624	0.297131	0.127892	-0.170778	-0.0347735	0.241926	-0.170317	0.274355	-0.067307	0.220995	0.150825
ARAF	0.0044985	0.282821	0.0950323	-0.141728	-0.720747	-0.859313	-0.120364	0.231508	0.125212	0.416863	0.292115	0.0830545	-0.87262	-0.578286	0.0910195	0.524505	0.560522	0.682687	0.450402	0.324877	-0.426126	-0.357812	0.120932	0.338241
ARAFP2	-0.814435	-0.712046	-0.853255	-1.2044	0.125255	-0.427293	-0.299077	-1.17243	-0.875621	-0.976203	-0.799642	-0.869262	-0.230426	0.099523	-0.481132	-1.16428	0.500745	0.385905	0.506956	1.68744	1.03523	1.21097	0.578361	0.520399
ARAP1	0.736973	0.110341	0.287321	1.06984	-0.670133	-0.629558	-0.00155787	0.752539	0.416799	-0.305006	0.297457	0.572914	-0.456842	-0.270124	-0.166417	0.623793	0.292066	-0.0781548	0.321437	0.292066	-0.904131	-0.904921	-0.821509	-0.598971
ARAP1-AS2	0.611036	0.907377	0.130618	0.751435	0.270855	-0.88304	-0.276207	-0.223473	1.24516	0.79065	-0.427135	0.00660004	-0.5493	0.493705	0.587829	-0.27345	-1.43731	-1.87506	-2.28299	-0.656262	0.570126	1.05131	-0.512456	-0.563413
ARAP2	0.463382	0.635635	0.328057	0.813615	-0.427154	-0.393153	-0.845865	0.0493241	0.658235	1.01681	0.496592	0.933348	-0.253147	-0.34415	-0.083266	0.586197	-1.31162	-0.315261	-1.00802	-2.12252	-3.09676	-3.53386	-3.18779	-2.7566
ARAP3	0.994314	0.527197	1.74677	0.607207	0.697718	1.16367	0.418744	0.532357	-0.0409105	-2.05712	-1.71467	-2.09554	-0.0510213	-0.788559	-1.13778	0.342021	-2.37166	1.6573	1.37925	-2.40161	-1.01086	-1.51843	-1.05966	-1.37165
ARC	-0.222519	1.17529	-0.415648	-0.0825219	0.0812471	0.105299	0.184324	0.0346559	-0.362248	0.17453	-0.250763	-0.490547	0.193791	-0.18043	0.189267	0.0200455	-0.182766	-0.392692	-0.391654	-0.489048	0.169541	-0.134158	0.070606	-0.0169103
ARCN1	-0.101587	-0.083962	-0.140946	-0.133295	-0.130825	-0.546291	-0.689967	-0.577133	0.0448507	0.0715928	-0.213567	-0.059843	-0.144198	-0.0573045	-0.524339	-0.420752	1.24455	1.00059	0.895742	1.23237	1.5438	0.772485	0.930148	0.921881
AREG	1.65333	1.76902	2.56608	-0.694358	-2.1595	-2.42278	1.96885	-0.408471	2.64575	2.47723	2.68781	-0.0990094	-4.20966	-1.71599	4.00658	0.385004	-1.11058	0.587445	1.38404	-1.73227	-1.1246	-0.839461	-0.279889	-0.894025
AREL1	0.0355064	0.00205657	-0.297719	-0.130997	0.362376	-0.397925	-0.203463	-0.106392	-0.0542604	0.0547251	-0.295216	-0.166872	-0.0120946	0.374706	0.214382	0.175708	0.451461	0.207179	0.184542	0.227239	0.26664	-0.160871	0.0962059	0.479832
ARF1	-0.0377199	0.0711198	0.0475471	0.147219	-0.488602	-1.46926	-0.835743	-0.00563005	0.18427	0.222263	0.200837	0.0783491	-0.287672	-2.09111	-0.878567	-0.125893	1.72745	1.59711	1.58261	1.8407	1.55918	0.731427	0.922944	1.32113
ARF3	0.383992	0.0412214	0.311693	0.520766	-0.421012	-0.0835724	0.0815055	-0.211432	0.19664	0.150573	0.180181	0.343493	-0.560939	0.312028	-0.157993	-0.363497	0.540719	0.0819175	0.347615	0.106739	-0.887605	-0.947738	-0.148708	-0.460622
ARF4	-0.115385	-0.0475478	-0.2095	0.0390072	0.291254	-0.340213	-0.506942	0.13762	-0.0264521	-0.389332	-0.477084	0.10822	-0.246775	-0.505986	-0.674721	-0.218901	2.04284	1.7621	1.95033	2.33538	2.09859	1.66093	1.39279	2.13989
ARF5	0.00234446	0.0462119	0.111249	0.00067	-0.390757	0.342511	0.598736	-0.0436412	0.124006	0.0518191	0.0716936	0.110627	-0.62267	0.290545	0.00294046	-0.516229	0.78472	0.864313	0.678605	0.74924	-0.300472	0.420303	0.451244	-0.276011
ARF6	0.711081	0.725083	0.658554	1.05785	0.428744	-0.0798409	-0.452987	0.145906	0.451402	0.278269	0.239598	0.5773	-0.0489637	-0.676049	-0.976203	-0.294789	-0.445105	-0.022141	-0.0699359	0.0733121	-0.79725	-1.3856	-1.26125	-1.00584
ARFGAP1	-0.0822089	-0.0741587	-0.122278	-0.104179	-0.459796	-0.27533	-0.173673	-0.133079	-0.0340203	-0.0391877	-0.117505	-0.0267507	-0.587019	0.102712	-0.350574	-0.347525	0.880223	0.764968	0.512909	0.862086	0.4123	0.802352	0.760533	0.931628
ARFGAP2	0.0836802	0.362222	0.332883	0.20838	-0.179214	0.213279	0.029667	-0.314307	0.192072	0.345863	0.34902	0.230783	-0.434877	0.303842	-0.13879	-0.566651	0.0914489	0.0914489	0.182327	0.0853642	-0.582545	-0.0920003	-0.170263	-0.567694
ARFGAP3	-0.214017	-0.074503	-0.215768	0.147952	-0.886281	-1.66655	-0.798999	-0.373817	0.18677	0.277706	0.206971	0.371523	-0.405533	-0.976203	-0.493373	0.097166	2.5974	2.69994	2.41028	3.05314	2.10904	1.40577	1.57183	2.19822
ARFGEF1	0.38708	0.118508	0.509429	0.358226	0.276001	0.615774	-0.733429	-0.646144	-0.0626464	0.123361	0.107049	0.207972	-0.215027	0.215278	-0.0468036	0.334101	0.177671	0.318729	0.15799	0.069754	-0.187702	-0.829759	-0.859823	-0.706391
ARFGEF2	0.0207229	0.218319	0.26592	0.238142	-0.507173	-0.258195	-0.596259	-0.738893	0.330984	0.326059	0.37874	0.506453	-0.695457	-0.417373	-0.161104	-0.646359	0.0986631	0.309943	0.50845	0.683682	-0.771589	-0.648952	-0.258571	-0.725973
ARFGEF3	-0.659955	-0.736395	-0.698386	-0.753578	-0.0333247	-0.143028	0.0270439	-0.213198	-0.609947	-0.605675	-0.512104	-0.559822	0.0712977	-0.336345	0.0429283	-0.224994	1.90163	-0.0396664	0.241521	0.30788	0.76225	-0.0418805	-0.0939025	0.118915
ARFIP1	0.14088	-0.647737	0.0873506	0.469968	0.168762	-0.479121	-1.1746	-0.87367	0.415552	-0.0430939	0.0450881	0.868875	0.653489	0.511074	-1.18219	-0.0471175	0.396528	-0.0440762	-0.635059	0.576978	-0.159185	0.0162371	-0.486294	-0.265987
ARFIP2	0.294624	0.145085	0.176546	0.15578	-0.432001	-0.379936	-0.330295	-0.329173	0.224334	0.062496	0.165557	0.281866	-0.542981	-0.208101	-0.461451	-0.473649	1.18008	1.03431	0.952527	1.12945	0.555027	1.0024	1.12035	0.919986
ARFRP1	0.0580701	0.239531	0.0617141	0.0321806	-0.159052	0.0716414	-0.322305	-0.0889602	0.226874	0.0694477	-0.101335	0.0099786	-0.170737	0.291225	-0.326674	-0.27572	0.32221	0.399845	0.284203	0.500338	-0.150094	0.432156	-0.0508356	0.155942
ARG1	-0.806545	-0.81862	-0.776748	-0.749961	-0.0967347	0.702852	0.297402	-0.181027	0.165459	0.146274	-0.50226	-0.667241	1.61972	0.394142	0.537605	-0.214298	-0.645805	0.202542	-0.181463	-0.743773	0.0148488	-0.29945	1.19292	-0.146353
ARG2	-1.11381	-0.591065	-1.63791	0.296922	0.817518	0.627976	1.52595	-1.29153	-0.364765	-0.8048	-1.0671	-1.10358	-0.356288	-1.52169	-0.619309	-1.63924	2.70242	1.84699	2.16908	2.99297	1.89304	2.79839	2.7134	0.477298
ARGFX	-0.091929	-0.717186	-1.08041	-0.311349	0.595056	-0.539244	0.25575	0.154095	-1.67855	-0.0204541	0.354773	-0.300648	-1.15151	0.47856	-0.0543431	-0.0270148	0.220935	1.12347	-0.760058	0.400312	-0.765092	1.10997	0.629387	1.07522
ARGFXP2	0.912036	0.831338	0.41086	1.03759	-0.612395	0.637242	-0.347755	-0.68347	-0.559094	-0.584547	0.966941	0.570731	0.384877	0.00357369	-0.295399	-0.43231	-1.06611	-1.44076	-1.54247	0.200604	-0.337792	-0.682631	-0.370052	-0.208313
ARGLU1	0.325707	0.241937	0.259915	0.135152	0.163127	-0.391129	-0.248048	-0.263727	0.334831	0.260511	0.261118	0.183206	-0.151883	0.456288	-0.0703512	-0.361907	-0.381502	-0.285104	0.0536523	-0.709594	-0.789315	-0.959868	-0.855418	-0.79568
ARHGAP1	0.174722	0.282428	0.139783	0.230626	-0.474225	-0.130329	-0.0878374	-0.63287	0.196688	0.289563	0.180843	0.339127	-0.76325	-0.369796	-0.361416	-0.76325	0.421067	0.35566	0.374426	0.320309	-0.4958	-0.00420952	-0.197757	-0.454119
ARHGAP10	-0.897935	-0.202258	0.136292	-0.979765	-0.22793	-0.36705	-0.0844054	-0.382016	-0.762871	-0.0808957	-0.482212	-0.851471	-0.0495485	-0.509587	-0.0424415	-0.392116	2.3413	2.56704	1.98543	1.0169	2.75123	2.08365	1.18668	-0.285962
ARHGAP11A	1.80491	-0.613107	-1.14068	-0.00729422	-0.645785	-0.806671	0.226356	0.0078731	-0.380167	-0.962899	-1.10129	1.53936	-0.488417	-0.973773	-0.355841	-0.477896	2.57633	1.86475	1.91731	2.59034	3.04204	2.36471	3.25721	3.47935
ARHGAP12	-0.0156726	0.229318	0.316106	0.237507	-0.665691	-0.383987	-0.361812	-0.549831	0.399793	0.636837	0.579404	0.526328	-0.346058	-0.390274	0.0887545	-0.214456	0.448808	0.743304	0.743807	0.637958	-0.909354	-0.975506	-1.09493	-0.945657
ARHGAP15	0.254647	0.401205	0.339009	0.322187	-0.268935	-0.760886	-0.697065	-0.198789	0.345428	0.539874	0.336452	0.410814	0.106743	-0.555766	-0.290499	0.269842	-0.440269	0.0319384	-0.162235	-0.200934	-0.547779	-1.23348	-1.13002	-0.644261
ARHGAP17	0.599958	0.32737	0.445331	0.566394	-0.686564	0.23567	-0.522937	0.116871	0.48692	0.32053	0.445875	0.654075	-0.26206	0.456462	-0.390274	0.0985846	-3.42508	-3.21832	-1.34657	-3.79353	-3.65378	-3.21832	-3.35795	-3.44088
ARHGAP18	-0.182605	-0.0625871	-0.397409	0.162424	0.558859	-0.333874	-0.291972	0.992688	-0.507233	-0.0650262	-1.15389	-0.0574365	-0.783795	-0.139385	-0.428615	-0.369451	1.43575	1.60585	1.52232	1.60482	0.713697	0.582162	0.468182	0.834178
ARHGAP19	0.2197	0.0145834	0.139934	-0.0536918	-0.349172	-0.773224	-0.307053	-0.709904	0.277317	0.30865	0.381389	0.222263	-0.366613	-0.278214	-0.241358	-0.350739	0.344518	-0.346761	-0.24277	0.0620293	-0.138706	0.0962059	0.52364	0.122821
ARHGAP20	3.31848	2.98943	4.27331	2.62646	-0.649181	1.76326	-0.41345	-0.309337	2.20179	2.8052	2.6928	2.05422	-0.442263	1.61703	-0.328811	-0.838977	-1.32683	-1.7628	0.35871	0.301387	-0.367599	-0.750834	-0.416794	-0.613331
ARHGAP21	0.393243	0.776585	-0.0466022	0.629088	0.660581	0.464378	-0.294124	0.667124	-1.08177	-0.846689	-1.11476	-1.22309	-0.455877	-0.611283	-0.385327	-0.458755	0.54493	1.68504	-0.00887589	0.556134	0.114584	-0.290674	-0.519945	0.278641
ARHGAP22	0.177589	1.32158	1.29578	0.935821	-1.1081	-3.53914	-0.429642	-3.01284	3.94011	4.64345	4.92288	4.50308	-0.0363637	2.01579	1.68364	-0.132441	-2.39073	-2.50613	0.90136	-1.73741	-2.25888	-2.67514	-2.32865	-2.68733
ARHGAP23	-0.526371	-0.854512	-0.601747	-0.874938	-0.69197	0.277078	-0.183213	-0.511864	-0.462377	-0.137493	-0.818208	-0.351641	-0.0647909	-0.493649	-0.40369	-0.10303	2.66944	2.43953	2.09359	1.75846	1.78451	1.36784	1.51722	2.33204
ARHGAP24	1.73611	1.55953	2.31858	1.73774	0.47278	0.842309	0.0683967	-0.210373	0.909282	0.254833	0.946157	0.0790647	-0.276478	0.3762	-0.552962	-2.34234	-2.80024	-2.2317	0.678208	-4.27496	-2.58502	-3.197	-3.32342	-3.76461
ARHGAP25	0.690936	0.229392	0.644213	0.862548	0.365308	0.326605	-0.296868	0.211848	0.360187	-0.446162	0.0376287	0.233734	-0.175112	-0.121516	-0.265443	-0.644068	-0.904131	-1.51178	-0.968086	-0.805281	-1.16584	-1.28203	-1.59925	-1.23274
ARHGAP26	0.349066	-0.306589	-0.100063	-0.172092	0.0228277	-0.392666	-0.911455	-0.682247	-0.303775	1.13906	-0.0539295	0.0338736	0.703467	0.26776	0.103677	0.173943	0.0762644	-0.0417679	0.368724	0.114124	-0.24883	-0.658729	-0.288894	-0.553962
ARHGAP27	0.0225503	0.000249075	-0.0920784	0.0480327	0.177833	0.0216387	0.0989169	0.205711	-0.0246343	0.00739301	-0.0900242	-0.0187836	-0.201191	-0.339948	-0.318985	-0.58222	0.806309	1.10414	0.716861	1.1805	0.947958	1.15699	1.48185	1.04437
ARHGAP27P1	0.455111	-0.283285	-0.601183	-0.357411	-0.21871	0.465395	0.0788476	0.751849	-0.973298	0.201453	0.0931713	-0.836374	0.25991	0.578702	-1.10185	1.03609	-1.89025	0.672929	-0.691985	0.256217	-0.392555	0.349585	0.246321	1.15136
ARHGAP27P2	0.399083	0.149273	-0.397366	0.166575	-0.265725	-0.0275014	-0.186638	0.964935	1.2087	0.567935	0.469031	0.765264	-0.27491	1.01125	0.912093	1.02353	-1.63396	-1.08708	-2.82298	-1.53475	-0.830935	-0.765307	-1.55878	-0.893579
ARHGAP28	-0.418873	-0.455347	-0.41011	-0.386009	0.173127	0.266051	0.300872	0.57571	-0.314161	-0.303933	-0.250313	-0.363861	0.339567	0.479437	0.369492	0.183233	-0.149363	0.0150837	-0.338276	-0.319804	0.359697	0.0441333	0.25916	1.20211
ARHGAP29	-0.661075	-0.664243	-0.0496701	-0.599628	-0.0822089	0.151038	0.158883	0.00347396	0.124602	-0.122195	-0.373317	0.0542899	0.413209	-0.267982	0.8167	-0.0918478	-0.423922	-0.685266	-0.532491	-0.659879	0.152977	0.350351	0.0580782	-0.00372043
ARHGAP29-AS1	-0.334621	-0.3078	-0.259386	0.108217	0.241912	0.221558	0.329784	0.230753	-0.215635	-0.211667	-0.0172506	-0.33206	0.38435	0.292026	0.464112	0.214932	-0.0535069	-0.179051	-0.0376623	-0.276238	0.377073	0.00197189	0.320567	0.198838
ARHGAP30	0.516471	0.318191	0.312602	0.558019	-0.0590449	-0.232329	-0.316933	0.0517144	0.404516	0.263994	0.141221	0.540199	-0.254663	0.057799	-0.625152	-0.276846	0.38414	0.214874	0.143833	0.312682	-0.571643	-0.427004	-0.655102	-0.460123
ARHGAP31	0.672257	1.1558	0.76412	1.18036	1.00983	0.160613	0.270699	0.730848	-1.91942	-1.97861	-2.11745	-1.94292	-0.168413	-1.2329	-1.63182	-1.71163	0.239273	0.348349	0.704078	-0.563336	-0.844167	-1.33689	0.491074	-0.429269
ARHGAP32	0.316369	-0.0369638	-0.0941561	0.128544	-1.33342	-0.874817	-0.0831012	-1.00603	3.56111	3.59727	3.62543	3.70255	-0.475508	1.03248	1.78735	1.12365	-0.502116	-0.438804	2.07147	-0.337996	-0.507318	-0.956562	-0.60883	-0.60331
ARHGAP33	-0.102424	-0.190712	0.196064	-0.325627	0.382416	-0.12097	0.0410573	-0.501324	-0.2107	-0.143844	-0.220683	-0.152212	-0.134336	0.446647	-0.0396041	-0.459169	0.266116	-0.00728697	0.104493	0.0590597	0.294343	0.389112	0.468481	0.524848
ARHGAP35	0.562931	0.618612	0.39424	0.183936	-0.945285	-0.611104	-0.398736	-0.689797	0.80143	0.941512	0.718106	0.449151	-0.0250814	0.0154361	-0.0995005	0.239638	0.38111	0.063769	-0.00764198	0.0259777	-0.598145	-0.83588	-0.0643223	-0.292224
ARHGAP36	-0.515262	0.352897	-0.465591	-0.52358	0.0215323	0.101145	0.230158	0.067779	-0.412155	-0.34902	-0.223716	-0.528953	0.21045	-0.173863	0.188527	-0.0611901	-0.228899	-0.427397	-0.483756	-0.606595	0.179845	-0.139747	0.0998682	0.0346353
ARHGAP39	0.164348	-0.61866	-0.455136	-0.883582	-0.822426	0.0232375	-0.599391	0.0555018	1.96236	2.28038	1.13806	1.31094	0.754454	1.03181	0.41669	1.31438	0.356433	0.0449782	0.00845049	-1.00322	-0.492514	0.0658236	-0.582285	-0.379465
ARHGAP4	0.289598	0.256311	0.379487	0.0881294	-0.0429511	0.336988	0.344014	0.110734	0.305116	0.296474	0.382296	0.182488	-0.316656	0.23742	0.0683846	-0.393984	-0.690741	-0.274608	-0.289864	-0.331455	-0.91349	-0.681886	-0.689842	-0.977748
ARHGAP40	-0.0172826	0.0660124	0.202022	-0.0654211	-0.362017	0.490145	-0.340055	0.422095	-1.25322	-1.39209	-1.65359	-1.83843	-1.15841	-0.445552	-0.900835	-0.571423	0.61137	0.3526	0.0725642	0.167498	-0.0336069	0.534406	-0.411957	0.377844
ARHGAP42	-0.134642	0.0966905	0.0568092	-0.172396	-2.84078	-1.54304	-0.749961	-1.41843	0.0836312	0.578314	0.350915	0.135293	-0.698197	-0.59779	0.167658	-0.599625	1.51198	1.53657	0.623045	1.13779	0.772889	0.604371	0.676803	1.08065
ARHGAP44	-0.0244199	0.00347396	0.30877	0.454178	-0.990935	0.418621	1.39004	0.515358	-1.75883	-1.92931	-2.07045	-3.31209	-2.09313	-0.824089	-0.840047	-1.62757	0.596424	1.3123	-0.0463447	0.51255	-0.397776	0.970397	1.80192	1.77806
ARHGAP45	0.360071	0.345727	0.309353	0.378954	-0.234829	0.194113	0.119064	-0.0805062	0.457655	0.211603	0.276228	0.372128	-0.617576	-0.329439	-0.293661	-0.356605	-0.143011	-0.00943622	-0.0917518	-0.0830261	-0.920408	-0.74242	-0.726475	-0.872608
ARHGAP5	0.545058	0.506103	0.822709	0.482316	0.356756	-0.620268	-0.865897	-1.01543	0.260049	0.582811	0.383269	0.187662	0.562255	0.361958	0.0263948	-0.611732	-1.12257	-0.704716	-0.448763	-0.558299	-0.441887	-1.11176	-1.08518	-1.44138
ARHGAP5-AS1	1.31212	0.756551	1.54164	0.427376	-0.387092	0.625431	-1.03263	-0.797745	1.14107	0.4441	1.01983	0.470259	0.4064	0.451835	-0.633532	0.189929	-1.12085	-0.917947	-0.489048	-1.35041	-1.04441	-0.813648	-1.224	-0.909879
ARHGAP6	2.3006	0.111415	1.42565	1.12204	2.88509	1.65692	0.301473	0.554154	-0.348217	-1.43757	-1.22817	-1.52854	0.140525	-0.541504	-0.538534	-1.18888	2.18264	0.94477	0.511158	0.0339409	0.193	-0.561697	-0.601993	-0.618008
ARHGAP8	-1.29798	0.245491	-0.0643577	-1.25399	0.0374325	-0.597972	0.706425	0.329703	-1.10383	-0.117155	-0.962125	-1.10503	-0.297608	-0.704415	1.41457	-0.689346	1.40577	0.829911	1.38756	0.866417	-0.266393	0.390948	0.719876	-0.498477
ARHGAP9	0.278944	0.0635761	0.209612	0.213279	-0.647737	0.0813765	-0.411735	0.608242	0.629143	0.511571	0.515401	0.936006	-0.114229	0.55236	-0.180575	0.75178	-1.1147	-0.812562	0.126186	-1.0009	-1.77	-1.32029	-1.39238	-1.07784
ARHGDIA	0.115163	0.273245	0.252678	-0.094287	-0.0764688	-0.669021	-0.0369638	-0.439692	-0.0831009	-0.128758	-0.237574	-0.316992	-0.46012	-0.629347	-0.341998	-0.870779	1.07532	0.704647	0.875661	0.873671	0.964207	0.722995	0.966712	0.823066
ARHGDIB	-0.0161657	0.127313	0.0546816	0.0566921	0.217305	-0.365954	0.083346	-0.478714	0.129313	0.0372213	0.202932	0.136797	-0.220008	-0.578095	-0.270525	-0.556656	0.578791	0.363782	0.326715	0.346612	-0.136979	-0.0447033	-0.131662	-0.405828
ARHGDIG	-0.486798	-0.492131	0.130553	-0.510269	0.22797	0.762957	0.226202	0.474856	-0.368634	-0.366787	-0.319085	-0.43308	0.299411	-0.0352638	0.276877	1.23708	-0.254862	-0.429331	-0.251612	-0.380057	1.46966	-0.0931547	0.150244	0.578562
ARHGEF1	0.365787	0.263591	0.16617	0.468356	-0.867867	-0.389611	-0.400882	0.22077	0.255214	0.519494	0.412876	0.452732	-0.462204	0.221663	-0.104358	0.145558	-0.470366	-0.186629	0.276536	-0.245277	-1.33277	-0.888256	-1.12849	-0.872092
ARHGEF10	0.116463	-0.202327	0.886086	1.65898	-0.811808	-0.343593	-0.450193	0.237547	0.411552	0.0972093	0.309007	1.09863	-0.512513	0.604084	0.265482	0.893751	-0.729216	-1.23478	-0.718663	-0.215507	-0.830482	-0.67535	-0.335902	1.78305
ARHGEF10L	1.89568	1.97248	2.07416	1.37011	-2.29186	-0.78118	-0.923078	-2.63996	0.537307	-0.814972	-0.245758	-0.0968516	-2.17923	-2.16704	-1.53837	-2.35997	2.97393	2.93654	2.5287	2.67879	0.998779	1.49599	-0.690102	-0.944041
ARHGEF11	0.384852	0.336025	-0.652317	-0.0966198	0.931903	1.67237	-0.286973	1.11929	0.333691	0.219084	0.109244	-0.409595	0.677419	0.501637	-0.183323	0.849911	-1.48946	-0.974842	0.310344	-2.76681	-1.30818	-1.75186	-1.32544	-1.36558
ARHGEF12	0.333332	-1.81619	0.914683	0.691094	0.938173	-0.371679	-0.662222	-0.315527	0.32136	0.538633	0.523984	-0.0419283	-0.747973	0.375698	-0.573239	1.06704	0.584671	0.148893	-0.00771475	0.147396	-0.596586	-0.161831	-0.630201	0.329005
ARHGEF15	-0.0632699	-0.204964	-0.346565	-0.18165	0.735155	0.529032	-0.223916	0.772005	0.0222783	0.174318	0.106244	0.00336176	0.265191	1.09282	0.142929	0.707306	0.131085	0.0665158	-0.510336	0.118011	-0.238808	0.593647	-0.174619	0.586455
ARHGEF16	0.179276	0.582941	0.355917	-0.19762	-0.784846	0.5958	-0.24584	-0.762854	-0.607292	-1.6859	0.115756	-1.00765	-0.828129	0.434244	-0.243158	-0.587233	0.333438	0.0230977	0.260746	0.475459	0.742114	1.04531	0.936934	0.343722
ARHGEF17	-0.839656	-0.873037	-0.797565	-0.632066	-0.0992949	-0.0282846	0.0944064	-0.0608986	-0.747251	-0.715016	-0.589414	-0.621223	2.07328	-0.2811	1.21177	-0.153985	-0.690102	0.88847	1.33395	-0.653008	0.0442797	-0.238554	-0.0202545	-0.0839197
ARHGEF18	0.561008	0.952176	0.56816	0.521903	-0.337311	-0.702866	-0.684683	0.0752912	0.81846	1.1937	1.01315	0.822012	-0.17548	-0.85017	-0.392252	0.563292	-0.13898	-0.0654283	0.178595	-0.0813001	-1.07574	-1.23184	-1.32823	-1.14658
ARHGEF19	-0.334576	0.0505696	0.105326	0.0874499	-0.92674	-0.224678	-0.551947	0.29719	-0.181652	0.503731	0.0887545	0.944792	-0.999673	0.292901	-0.971917	-0.154149	0.209841	0.710778	1.16078	0.609865	-0.111503	-0.555986	0.121164	-0.329025
ARHGEF2	0.637242	0.421953	0.405934	0.503055	-0.30185	-0.373889	-0.539415	0.141595	0.660835	0.237836	0.419748	0.381618	-0.0614607	0.131289	-0.74212	0.573165	-0.138635	-0.385365	-0.536943	0.0594773	-0.580515	-0.614152	-1.15374	-0.547497
ARHGEF25	-0.417039	-0.397323	-0.382621	-0.302669	0.252558	0.489296	1.05699	0.306419	-0.281317	-0.300346	-0.171587	-0.284577	0.478856	0.395291	0.558712	0.289475	-0.134038	-0.270214	-0.124184	-0.223393	0.552312	0.376363	0.440435	0.323567
ARHGEF26	0.028814	-0.197458	-0.397158	0.344153	0.172199	0.250351	0.188026	0.0260849	0.282747	0.102278	-0.27611	1.00924	0.23541	-0.0171388	0.209478	0.0610015	-0.333332	-0.532185	-0.446013	-0.425746	0.213668	-0.105162	0.0787934	-0.0011179
ARHGEF26-AS1	-0.800303	1.0464	-0.782888	-0.852023	-0.0172826	-0.229209	0.225371	0.7366	-0.69388	-0.686098	-0.620192	-0.779453	0.750229	0.84122	0.369688	-0.344344	-0.453425	1.3475	-0.289291	-0.894518	-0.0867599	-0.377388	0.637958	1.00966
ARHGEF28	-0.587132	-0.405616	-0.341411	-0.598936	-0.0438666	0.652695	0.444979	0.445719	-0.480592	-0.2581	-0.375044	-0.554134	0.220114	0.511516	0.206177	0.201453	0.242078	-0.00507275	-0.241117	-0.0603476	0.119081	0.765784	0.879663	0.804484
ARHGEF3	0.175014	0.101145	-0.0885985	0.0585524	0.655591	-0.290386	0.324387	0.635635	0.423907	0.387141	0.303842	0.0416229	0.154934	0.358869	0.295416	0.614632	-0.476813	-0.0711415	0.59323	-0.466542	-0.732141	-1.3383	-1.10852	-0.511281
ARHGEF3-AS1	-0.167506	-0.0960207	-0.109228	-0.977833	1.36657	-0.13739	0.277123	-0.275122	0.202307	-0.085892	-0.286336	-0.850395	1.5931	0.635456	0.175708	-0.0599823	0.208865	0.239666	-0.747606	-0.04167	-0.249869	0.678417	0.555334	0.523856
ARHGEF33	1.50786	0.288629	1.10668	1.26565	0.66102	-0.29854	-0.502772	0.98866	0.31838	-0.0166935	1.02805	0.173207	-0.56234	-1.01345	-0.385764	1.5037	-1.15686	-1.07159	-2.19789	-1.61131	-0.46512	-0.853845	-0.0707131	0.55245
ARHGEF35	-0.0735951	0.0564811	0.0324632	0.0403922	-0.350627	-0.97714	-3.32319	-2.27989	0.825285	1.22622	1.36815	0.951013	-0.366088	1.19643	-0.151279	-0.621339	0.795967	0.601232	0.414066	0.4414	-0.180767	0.0229973	-1.44039	-0.880529
ARHGEF37	1.10335	0.455723	0.160588	0.253842	0.518411	-0.798329	-0.487259	0.75462	-1.46415	-1.37759	-1.19638	-1.37152	-0.531246	-0.946427	-0.395862	-0.971593	3.54848	2.68571	3.19505	4.70068	3.43553	1.91447	-0.465259	0.596083
ARHGEF38	-0.567353	-0.0347683	-0.537021	-0.426447	0.0142779	0.799135	0.214814	0.108179	-0.435397	-0.433808	0.33789	-0.509892	0.942739	0.372934	0.954972	-0.00135732	0.213668	-0.51609	0.130301	-0.54995	0.816546	-0.133942	0.150535	0.561149
ARHGEF39	-0.82866	-0.826109	-0.703335	-0.32228	-0.416851	-0.429776	0.161073	0.0552883	-1.30238	-0.746228	-0.468511	-1.01262	-0.793523	-1.13578	-0.359333	-0.674606	2.23047	1.11806	1.0024	1.51583	1.49693	2.24727	0.895161	2.45568
ARHGEF4	-0.609464	-0.193076	-0.472756	-0.343985	-0.250123	0.139049	0.0526069	1.58221	-0.81299	-0.538822	-0.215501	-0.575198	0.799318	-0.407006	0.0222463	0.607262	-0.569627	0.501464	-1.0573	-0.107204	-0.0564992	-0.0680747	-0.112197	0.862315
ARHGEF40	-0.139153	0.805848	0.517119	0.456413	0.943498	-0.811206	-0.316284	1.46105	-0.516587	-0.493531	-0.368474	-1.67325	0.683895	-2.78654	-0.576259	0.709968	-0.292795	1.43461	1.69699	0.688862	-0.339025	0.36876	-1.10585	-0.345519
ARHGEF5	-0.438771	-1.1109	-1.17243	0.305645	-0.0190666	-0.86727	-3.12046	-1.45683	0.545745	-0.0837288	0.230414	0.554233	-0.307962	-0.227364	-0.57014	-0.418471	1.00833	0.500745	0.412959	0.896574	0.962332	0.746595	-1.84535	-0.282366
ARHGEF6	0.28257	0.259535	0.0637096	0.338455	0.169038	-1.37057	-0.47741	0.454118	0.178925	0.318888	0.264297	0.390976	-0.116196	-0.991903	-0.485976	0.62222	0.383344	0.20481	0.587445	0.211752	-0.730421	-1.11296	-0.991425	-1.01056
ARHGEF7	0.35902	0.254185	0.163989	0.0465452	-0.863947	-0.710305	-0.481379	-0.481379	0.878789	0.922231	0.884866	0.834495	-0.235814	0.099144	0.793191	0.443508	-0.0103542	0.0237379	0.260024	-0.102386	-0.875907	-0.64593	-0.70266	-0.439611
ARHGEF9	0.398699	0.297353	0.392666	0.435005	-0.384653	-0.65641	-0.476557	-0.522548	0.715687	0.741951	0.948862	0.772905	-0.272131	-0.136331	-0.275347	-0.177708	-0.441535	-0.033956	0.46808	0.14646	-0.490393	-0.526658	-0.559836	-0.574919
ARID1A	1.00917	0.874687	0.510975	0.885093	-0.627672	-1.10672	-0.993208	-0.626316	0.908868	0.935251	0.961781	1.01125	-0.303739	-0.547384	-0.80644	-0.187431	0.536803	0.101965	0.520892	0.376774	-0.506221	-0.511614	-0.862645	-0.330263
ARID1B	0.314486	0.469968	0.499938	0.210848	-0.443523	-0.356079	-0.107942	-0.547567	0.733394	0.772104	0.921541	0.568407	-0.378395	0.322471	0.243364	0.0809875	-0.346125	-0.0201124	-0.0334351	-0.176264	-1.22917	-0.915728	-1.06017	-1.03067
ARID2	-0.00923707	0.593956	0.469915	0.347273	-0.777008	-0.581763	-0.0340694	-0.460353	0.0613604	0.64821	0.548635	0.202167	-0.700468	-0.910098	0.126813	0.0562708	0.137924	0.433625	0.474499	0.296424	-0.501293	-0.541274	-0.334569	-0.473356
ARID3A	0.0516333	-0.204175	0.0749704	0.157206	0.00710165	0.0999126	0.78834	0.302248	-1.6859	-2.36911	-2.07527	-1.87157	-1.33539	-1.60891	-0.667241	-1.98423	1.17652	0.696791	0.415511	1.17167	0.698354	0.657835	0.372418	0.85575
ARID3B	0.148458	0.277123	0.206643	0.0539702	-0.601791	-0.366465	-0.168278	-0.142085	-0.242821	-0.160994	-0.400101	-0.352234	-1.08821	-0.608395	-0.775984	-0.901202	0.930008	0.947799	0.534911	0.655208	-0.0579505	0.43448	0.920669	0.845384
ARID3C	-0.104179	-1.52716	0.234392	-0.0989514	-0.703335	-0.640871	-0.336048	0.322028	-0.599377	-0.650251	1.27423	0.0324595	0.0325573	0.518018	0.683104	1.04191	-1.38131	1.04852	1.04758	-0.340686	-0.290799	-0.698264	0.0372137	1.38383
ARID4A	0.152551	0.232973	0.326605	0.365332	-0.329807	-0.770955	-0.613732	-0.0440048	0.525024	0.717883	0.372934	0.315184	-0.247036	0.592023	0.0249425	-0.210821	-0.085141	-0.315091	0.308189	-0.136185	-1.05142	-1.65736	-1.18003	-0.827451
ARID4B	0.489682	0.396981	0.505	0.587421	-0.682984	-0.7682	-0.589392	0.0288845	0.606105	0.757552	0.946845	0.811891	-0.678871	0.0137918	-0.0767338	0.471581	-1.68219	-1.10852	-0.318492	-1.75439	-1.6959	-1.52068	-0.99513	-1.8292
ARID5A	-0.210282	0.935821	0.0777954	0.00487098	-0.237344	-0.473859	1.49122	-0.0429511	0.0471848	1.26722	0.674784	0.0597556	0.0458356	0.0135602	1.98209	-0.143769	-0.537552	0.499903	0.216468	0.0918506	-0.629704	-0.459939	-0.0109182	-0.321759
ARID5B	0.221078	0.767988	0.606173	0.180689	-0.332484	-0.525375	0.731144	0.251655	0.385332	0.664474	0.631406	0.209683	-0.825967	-0.393145	0.0412761	0.32279	-0.21612	0.0783735	0.397401	-0.114678	-1.00275	-1.02434	-0.658971	-0.902768
ARIH1	0.303851	0.698591	0.440065	0.261978	-0.321254	-0.444179	-0.149759	-0.412263	0.369055	0.656979	0.469372	0.346604	-0.37263	-0.00532697	0.328825	0.186726	0.129861	0.185721	0.0292276	0.168846	-0.482325	-0.629858	-0.636571	-0.472391
ARIH2	0.290809	0.182319	0.303274	0.2745	-0.390094	-0.107085	-0.36147	-0.0276545	0.267849	0.142021	0.19561	0.245256	-0.490667	-0.315043	-0.444308	-0.197192	0.306839	0.175239	0.335257	0.417222	-0.444689	-0.315815	-0.322948	-0.458229
ARIH2OS	0.12412	0.453388	0.513937	0.0796031	-0.612982	-0.4213	-0.56557	-0.877889	0.854559	0.939595	1.26074	0.847356	-0.331481	-0.307456	-0.566682	-0.13447	0.256094	0.668135	0.731239	0.323107	-0.557528	0.054846	-0.280039	-0.453425
ARL1	0.107733	0.204583	0.103107	0.174945	-0.217753	-0.388504	-0.512512	-0.501512	0.268137	0.154589	0.0749203	0.304673	-0.220379	-0.249466	-0.600996	-0.533426	0.927744	0.937665	0.941302	1.23371	0.737691	0.458967	0.121814	0.493291
ARL10	0.741995	2.11477	0.54337	0.685481	0.169566	-0.924611	-0.438664	-0.936506	0.654937	0.609112	0.5773	0.631684	0.549377	0.0356552	-0.487595	-0.0106892	-2.85755	-2.31725	-2.43819	-1.94921	-1.4239	-1.41006	-1.87643	-1.81372
ARL11	1.07399	0.0262325	0.320946	0.996509	0.191076	0.148942	-1.18332	-0.257815	1.44638	0.261891	0.15754	1.9928	-0.845604	1.63665	-0.17525	1.69475	-2.14273	-2.60407	-3.50052	-2.13716	-2.42197	-2.94018	-2.06141	-2.82791
ARL13A	-0.549288	-0.523335	-0.500592	-0.489639	0.0867839	0.11309	0.221433	0.0966905	-0.00401257	0.129686	-0.286997	-0.140545	0.223837	0.382142	0.247074	0.0483455	-0.306344	0.0298434	-0.439347	-0.447178	0.220586	-0.120927	0.126764	0.0628937
ARL13B	0.851992	0.739479	0.228139	1.13359	0.705662	-1.12912	-0.687347	-0.331753	0.552102	0.636633	0.478375	0.66573	1.19077	-0.719713	-0.530755	-0.453122	-0.416728	-0.248129	-0.98629	0.65827	0.995822	-0.977248	-0.69113	-0.504962
ARL14	1.46653	2.72109	2.09953	2.81859	3.27724	1.28227	0.606463	1.87639	-1.77322	-2.09313	-1.79627	-2.17689	-0.609541	-2.08232	-1.31114	-2.12457	1.64781	1.92086	0.0640175	0.578562	-0.384858	-1.60813	-0.769253	-0.154382
ARL14EP	0.57835	0.436769	0.424217	0.506254	0.200133	0.299785	-0.329234	0.168989	0.564707	0.371585	0.417314	0.314233	-0.598989	-0.490404	-1.16994	-0.245262	0.103138	-0.00591054	0.200908	0.215716	-1.01671	-0.962797	-1.14452	-1.20033
ARL14EPL	-0.598936	-0.596061	-0.547242	1.1655	1.56335	-0.0714968	0.117319	1.26565	-0.480084	-0.48421	-0.386251	-0.573934	0.16668	-0.275347	0.19945	-0.114017	-0.390618	-0.58319	-0.387602	0.646556	0.0863523	-0.271199	0.0427509	-0.0881022
ARL15	0.986733	0.674092	0.165907	0.518174	1.10668	-1.09476	-0.81057	-0.0206217	0.234938	0.934343	0.941512	0.390233	0.704678	-1.17988	0.320035	-0.442568	0.222946	0.179514	-1.81065	0.124908	-0.510138	-1.41261	0.478444	-1.25949
ARL16	0.302155	0.341839	0.224621	0.362159	-0.527037	-0.594355	-0.268525	0.146922	0.247321	0.475624	0.384521	0.357469	-0.413821	-0.466795	-0.374941	-0.294037	0.296379	0.130388	0.133552	0.293071	-0.654594	-0.2377	-0.342003	-0.350863
ARL17A	0.360253	1.5835	0.337676	0.907056	-0.492845	-0.753053	-0.31689	-0.124713	0.511571	1.27372	0.209842	0.770991	-0.464057	-0.352348	0.135266	0.529886	-0.989295	0.390825	-1.56973	0.0161078	-0.778716	-1.14193	-1.03531	-0.455639
ARL2	0.656187	0.605738	0.559196	0.872102	0.953403	0.992688	0.384266	0.646143	0.111739	-0.437727	-0.355879	0.31105	0.905404	0.61498	-0.600618	0.11511	-0.166883	-0.0765417	-0.339271	0.101965	-0.56247	-0.32154	-0.745002	-0.565507
ARL2BP	0.2405	0.332459	0.396673	0.259082	0.675514	0.23669	-0.0682136	-0.373129	0.331779	0.0637107	0.2468	0.259309	-0.149974	-0.237695	-0.57588	-0.535394	0.112955	0.090842	-0.34319	0.280051	-0.123347	-0.650358	-0.591023	-0.69592
ARL2BPP2	-0.56127	0.730451	-0.50072	-0.578998	-0.0567435	0.0047255	0.161205	0.593774	-0.432579	-0.432943	-0.242679	-0.0672723	0.159849	0.703907	0.205464	-0.117276	-0.298498	-0.476896	-0.416052	-0.631287	0.120344	-0.268993	0.0720335	-0.0234339
ARL3	1.07645	0.611825	1.17407	1.60975	0.642575	0.980619	-0.136705	0.56904	0.187354	-0.52652	0.212294	0.236507	-0.1128	0.529956	-1.01689	-0.393342	-1.77	-1.677	-0.369934	-0.638805	-0.762105	-0.669515	-2.3534	-0.355795
ARL4A	1.26755	0.414828	1.01143	-0.146581	0.626803	-0.0915273	-1.1402	-0.240713	1.72243	0.65188	1.07026	-0.0485096	0.813116	0.590027	-0.0107836	0.70072	-0.628248	-1.26652	0.0296962	-1.5609	-1.17567	-1.94803	-2.44751	-1.80556
ARL4C	0.222386	-0.703888	-0.105759	-0.754584	-0.480661	0.172899	1.26943	0.438447	0.0488098	-0.894471	-0.802636	-0.447187	-0.723892	-0.108411	1.43507	-0.286307	1.16904	1.24037	1.48045	1.13881	0.220383	0.299354	-0.288102	-0.528919
ARL4D	0.496099	0.773141	0.28625	0.921682	1.14953	1.49661	0.840794	0.317819	0.468256	-0.077714	-0.525863	-0.0861637	1.88419	0.55608	1.31487	-0.34189	-1.71216	-1.91817	-3.44906	-2.1034	-2.14966	-1.21855	-1.94921	-1.56759
ARL5A	0.11425	0.140804	0.0957483	0.10526	-0.0080864	-0.576122	-0.228197	-0.368183	0.16919	0.121383	-0.343641	-0.0788328	-0.39687	-0.551887	-0.122069	-0.13517	0.721365	0.665414	0.680338	0.732762	0.697817	0.194781	0.263526	0.489248
ARL5B	-0.124758	-0.0161038	-0.364451	-0.853978	-0.337359	-1.51286	-0.193172	-1.31074	0.0565448	0.441508	0.0622263	-0.602385	-0.152982	-0.803427	0.78555	-0.733314	1.23711	0.785755	0.422078	0.92713	1.35137	0.293359	1.15088	1.02573
ARL5C	-0.082924	-0.0482019	0.0131182	-0.134513	-0.372176	0.915457	0.432079	0.285415	0.536805	0.00808401	0.107608	-0.126217	-1.56865	0.408337	0.15212	0.356586	0.247488	0.134302	0.525108	-0.960894	0.0945575	0.612913	-0.318153	0.49088
ARL6	0.347049	0.551143	-0.0587862	0.0116133	0.209021	-1.65536	-0.517142	-1.64058	-0.0461992	0.335696	0.253528	0.287304	0.970325	-1.92407	-1.07553	0.175678	0.248167	-1.09156	-2.32601	0.847075	0.334157	-1.42152	-0.318551	0.0736122
ARL6IP1	0.139334	0.108526	0.154929	0.230718	-0.501649	-1.36683	-0.803233	0.228505	0.213554	0.265876	0.179137	0.260005	0.0271976	-1.45977	-0.536648	0.389649	1.59941	1.42712	1.36204	1.72517	0.827014	-0.320229	-0.516791	0.54117
ARL6IP4	0.0381622	0.0747921	0.145085	0.0271941	-0.199696	0.124488	0.173127	-0.0140129	-0.0775615	-0.00356731	0.00991556	0.0235384	-0.422932	-0.342217	-0.349956	-0.604405	0.71929	0.579598	0.316912	0.653219	0.0172982	0.635082	0.698065	0.489312
ARL6IP5	0.428744	0.167937	0.203132	0.73918	1.09936	0.460471	0.0908462	0.561946	0.136523	-0.513565	-0.664572	0.361586	0.407717	-0.267346	-0.660779	0.115505	-0.150018	0.325154	-0.25369	0.0617157	-0.284247	-1.10772	-0.549336	-0.193
ARL6IP6	0.312707	0.0436483	0.16695	0.502673	0.652072	-0.216882	-0.764377	0.217673	0.302932	0.0183366	-0.217891	0.229095	-0.213678	-0.845274	-0.652853	-0.300879	0.354899	-0.130795	0.218843	0.545176	-0.123842	-0.911418	-0.279277	-0.594455
ARL8A	0.37004	0.455928	0.527941	0.198218	-0.252799	-0.040876	0.339664	0.480693	0.324749	0.247232	0.354706	0.134479	-0.471851	-0.110954	-0.0181303	0.189587	-0.00137248	0.108398	0.146404	-0.0424952	-1.03187	-1.05257	-0.646612	-0.525932
ARL8B	-0.11836	0.0822501	0.0462832	0.0501239	-0.105577	-0.501727	-0.264554	-0.58388	-0.114835	0.396245	0.0292149	0.120975	-0.188634	-0.400273	-0.246991	-0.467029	0.763268	0.667382	0.632141	0.745953	0.140422	-0.0525911	0.815169	0.256167
ARL9	-1.7521	0.773345	-3.49017	-1.92828	0.308408	1.09066	-0.145133	0.0527316	-1.47511	0.0716936	-1.1664	-1.23778	-1.24046	0.150573	-0.126326	0.150066	-0.0613333	0.399185	-2.13716	0.531814	-0.652735	0.291499	-0.45573	0.131645
ARMC1	0.25355	0.199411	0.137156	0.221248	-0.829012	-0.321724	-0.9728	-0.68813	0.172564	0.339828	0.476122	0.421254	-0.594196	-0.0745543	-0.722124	-0.660183	0.532327	0.218089	-0.402842	0.632725	-0.267594	0.480115	-0.296935	-0.239552
ARMC10	0.26775	-0.0158431	0.005662	0.119968	-0.0294636	-0.0191437	-0.668902	-0.384164	0.171553	-0.0923664	-0.38844	0.167197	-0.157694	-0.631052	-1.19928	-0.231759	1.10621	0.784218	0.635815	1.10108	1.04584	0.453388	0.43413	0.671719
ARMC12	-0.140946	0.689745	0.349939	0.493705	0.525143	0.0196972	0.587579	1.1149	-0.26206	0.435265	-0.283681	0.0668185	-1.31344	-0.674399	0.204526	0.534465	-0.31654	0.406804	0.341067	-0.0385408	-0.297102	-1.34566	-0.539987	-1.12926
ARMC2	-1.21416	-1.1646	-0.29189	-0.86916	-0.505037	-1.11546	0.110816	-0.367786	-0.0218022	0.00758583	-0.491368	-0.304349	-0.961807	0.0510522	-0.124042	-0.0204961	0.659965	1.58192	1.08065	1.89369	0.210696	0.331056	-0.338612	0.216702
ARMC3	-0.618159	0.269372	-0.364025	-0.639699	0.0036961	-0.0197958	0.113863	0.362551	-0.468098	-0.590005	-0.405959	-0.564662	0.280169	0.0667486	0.161656	-0.101035	-0.332486	-0.766377	-0.527323	-0.0213768	1.21109	0.231927	0.0214646	0.165022
ARMC4	-0.516682	-0.01105	-0.460131	-0.439754	0.333555	0.139783	0.256102	0.122544	-0.384789	-0.371189	-0.238463	-0.424111	0.28493	-0.161389	1.43293	0.076018	-0.237457	-0.418839	-0.372671	0.0499007	0.294219	-0.0811064	0.163639	0.267569
ARMC5	0.195725	0.226533	0.128175	-0.00679197	0.16466	0.39852	0.163862	-0.0369638	-0.0422792	-0.252349	-0.414314	-0.141652	-0.370215	-0.388291	-0.199934	-0.628336	0.677415	0.457276	0.0486248	0.296694	0.183879	0.624315	0.452772	0.41349
ARMC6	0.107797	0.0700316	0.0103489	0.158606	0.0322796	-0.438538	-0.469936	-0.256244	-0.00656039	0.0794149	-0.09529	0.250178	-0.0581931	-0.381395	-0.631422	-0.243506	0.932644	0.602937	0.693899	0.851905	0.772656	0.557984	0.646189	0.899408
ARMC7	0.446752	-0.00519751	0.0391421	0.209504	0.180988	0.37301	-0.703739	-0.241534	0.449589	-0.589308	-0.308958	0.153553	-0.0837928	0.062496	-1.32366	-0.685052	0.401836	-0.108794	-0.224389	0.439625	-0.203045	0.332902	-0.34469	-0.554244
ARMC8	0.330801	0.473474	0.380376	0.307584	-0.574989	-0.109405	-0.243358	-0.100886	0.435265	0.535444	0.547487	0.376606	-0.568368	0.0449184	-0.0758574	0.117263	0.0534086	-0.0238164	-0.0420948	-0.0011179	-0.662711	-0.652141	-0.45813	-0.374837
ARMC9	-0.462381	0.299444	-0.0226029	0.282898	-0.845075	-1.09107	-1.07801	-0.443018	0.183233	0.3285	-0.320217	0.0537917	0.0427302	-0.861897	-1.11897	-0.757218	2.46	1.91672	1.34546	2.00282	1.49053	0.864707	1.46966	0.664625
ARMCX1	-1.64058	-1.63564	-1.48816	-1.51465	-0.718279	-0.806545	-0.489639	0.105089	0.721968	0.756771	0.339047	1.72366	1.56906	2.16444	1.00138	1.83023	-0.399256	1.23494	1.53953	-1.23045	-0.420955	-0.612594	-0.47659	1.42111
ARMCX2	0.593289	0.258909	0.373335	1.20979	0.332736	0.846051	-0.881586	0.762036	0.554069	0.0776918	0.148036	1.18295	0.80099	0.750663	-0.659705	1.02625	-1.66975	-1.92375	-1.6025	0.0457338	-1.69997	-1.37798	-2.75038	-1.3218
ARMCX3	0.361844	0.315269	-0.066617	-0.0943756	-0.840541	-0.541931	-1.09674	-0.293051	0.283956	0.222964	-0.320642	-0.274326	-0.482665	-0.330854	-0.431321	-0.384736	2.01156	1.51332	1.62352	2.17994	2.30413	1.77095	1.05663	1.96095
ARMCX3-AS1	-1.04961	0.863943	-0.634197	0.259535	-0.31689	-0.285766	-0.0666684	-0.334286	0.493394	-0.520659	-0.75212	-0.404995	0.45871	2.77454	-0.0537716	-0.250737	0.647791	-0.648601	-0.216514	-0.931682	1.53131	-0.407562	0.651064	-0.24383
ARMCX4	0.299152	0.220978	0.0836148	-0.0936381	0.0731059	-0.349111	0.0701712	0.1798	0.535099	0.270955	0.313648	0.106028	-0.178284	0.325854	0.0212921	0.637975	-0.562844	-0.383848	-1.09869	-0.791516	-0.427946	-0.538045	-0.414376	-0.453044
ARMCX5	0.284603	0.401553	0.387481	0.154532	-0.54482	-0.00462386	-0.51429	-0.338067	0.160258	0.410956	0.277317	0.331429	-0.43231	-0.215027	-0.374778	-0.406193	0.341067	0.392344	0.416978	0.182112	-0.560971	-0.359289	-0.0741712	-0.061222
ARMCX6	-0.0135258	0.0297439	-0.0288064	0.258909	0.0744769	-0.291611	-0.484814	0.443577	0.0552355	-0.0679892	-0.177103	0.283956	0.14105	-0.633473	-0.753412	0.0354741	0.267337	0.317175	0.459762	0.372525	-0.233673	-0.345946	-0.566097	-0.0970055
ARMH1	0.180793	-0.0390565	-0.635383	-0.0290542	-1.65141	-0.298042	0.638604	0.122829	1.68904	1.89775	1.25474	1.51393	0.0695995	1.04862	1.53133	0.601348	-3.22403	-2.12655	1.01815	-3.1701	-4.15353	-4.56341	-3.9095	-3.82478
ARMH3	0.14342	0.411528	0.436915	-0.143606	-0.748709	-0.703243	0.604776	-0.321212	0.259732	0.437802	0.443976	0.0776918	-0.747392	-0.605675	-0.0209211	-0.41933	0.000577952	0.00740856	0.145081	-0.334784	-1.15719	-0.812562	-0.322568	-0.629212
ARMH4	-0.487204	-0.523725	-0.460353	-0.5046	0.0317396	0.399514	0.192017	0.0878218	-0.385835	-0.371531	-0.292984	-0.480838	0.201302	-0.0770054	0.204768	0.0119835	-0.234291	0.32975	-0.416794	0.0735156	0.16478	-0.063191	0.0943527	0.0154394
ARMS2	0.46466	-0.514412	-0.675922	-0.627972	0.729843	-0.0408107	0.134739	-0.0103576	-0.592682	0.0727408	0.194376	-0.0266024	0.143977	-0.287462	0.215393	0.775815	-0.460364	0.260585	-0.453508	-0.567253	0.0761503	-0.237245	0.0700137	-0.0625945
ARMT1	-0.386587	-0.573776	-1.64326	0.0856843	0.374199	-0.611402	-0.59297	0.194848	-1.10845	-1.28202	-1.0787	-0.312251	0.000551835	-0.467825	-0.713749	-0.458	0.895317	0.747694	0.444734	0.929021	0.881557	0.410627	0.441018	0.837503
ARNT	0.361086	0.0395699	-0.104917	0.263544	-0.653689	-0.680004	-0.831983	-0.629938	0.614138	0.616695	0.547393	0.848162	-0.0413642	0.756599	-0.195066	0.123146	0.270481	0.110341	0.685866	0.559384	-0.538859	-0.752196	-0.782044	-0.673874
ARNT2	-0.86916	-0.859807	-0.0236932	-0.183504	-0.191645	0.195278	0.008495	0.337449	-0.720049	0.14898	-0.602879	-0.0874027	0.0184304	-0.275623	0.0208824	-0.292679	-0.697546	0.230168	0.239403	-0.865719	0.856648	0.106739	0.246105	-0.185721
ARNTL	0.36486	0.329287	0.131955	0.160765	-0.538714	-0.261481	0.618101	0.167389	0.270214	0.35741	0.0459938	0.045775	-0.208321	0.18712	0.889959	-0.3477	0.117284	0.256252	0.12142	-0.526299	-1.14338	-0.740024	-0.344591	-1.09637
ARNTL2	-0.785279	0.0233602	-1.80276	-0.0941561	1.59273	-0.025916	0.811464	0.343826	-1.70579	-1.94946	-2.31615	-1.9007	-0.63322	-1.31675	-0.58901	-3.40123	2.44629	1.69054	1.31004	2.39391	2.76737	2.08555	2.72908	2.47191
ARPC1A	0.104185	-0.141385	-0.00377244	0.209339	-0.364943	-0.170251	-0.45346	0.105808	0.236092	-0.0917612	-0.134923	0.378403	-0.352941	-0.251352	-0.528814	-0.235259	0.391131	0.323191	0.401074	0.895161	0.0708595	0.622302	0.242727	0.540586
ARPC1B	0.14452	0.219613	0.102612	0.406501	0.635068	-0.406621	0.253821	0.596227	-0.442226	-0.417913	-0.65421	-0.0372966	-0.280179	-1.09764	-0.495471	-0.52732	0.74104	0.728428	0.607381	0.352241	-0.175591	-0.300546	-0.244331	-0.287177
ARPC2	0.0282713	0.0303497	0.0234825	0.12863	0.207937	0.0674142	0.591634	0.159891	-0.253919	-0.239701	-0.371656	-0.11905	-0.410536	-0.523202	-0.183395	-0.435163	0.394166	0.369085	0.224112	0.299354	-0.170903	0.227806	0.123897	0.208512
ARPC3	0.131855	0.226916	0.276134	0.0825136	0.0606735	0.108895	0.169271	-0.0932347	0.242135	0.194755	0.247681	0.209613	-0.294218	-0.420993	-0.185917	-0.352148	0.31475	0.339504	0.11516	0.194602	-0.489351	-0.334833	-0.266442	-0.448461
ARPC4	0.225769	0.147746	0.224589	0.288128	-0.597972	-0.244089	-0.0996436	-0.345058	0.127342	0.157712	0.202685	0.252228	-0.703103	-0.583653	-0.447553	-0.552345	0.630753	0.380674	0.309864	0.386906	-0.582285	0.267814	-0.109763	-0.598359
ARPC5	-0.249417	-0.192457	-0.114558	0.314602	-0.359347	0.962096	1.58113	-0.307179	-0.483051	-0.457789	-0.750471	0.0499593	-0.554184	0.273743	0.885252	-1.05706	0.613817	0.594561	0.352241	0.465564	-0.360151	0.881965	1.26266	0.060924
ARPC5L	0.263227	0.0786066	0.151284	0.170873	-0.540279	-0.216049	0.952785	0.478233	-0.209669	-0.723802	-0.812267	-0.255502	-0.915944	-0.986655	-0.454794	-1.01048	0.906518	0.617432	0.380769	0.650356	-0.11872	0.842154	1.01365	0.874069
ARPIN	-0.375889	-0.357671	-0.319111	-0.212758	0.367501	0.417773	0.569623	0.417773	-0.277826	-0.255065	-0.141032	-0.17418	0.579016	0.216925	0.724328	1.27468	-0.113058	-0.265814	-0.0304752	-0.082853	0.616354	0.233451	0.570377	0.411292
ARPP19	-0.0170481	0.101828	0.0384802	0.0599339	-0.168385	-0.572494	-0.39971	0.167719	-0.312433	-0.0117563	-0.419834	-0.138597	-0.579001	-1.14855	-0.469049	0.0174828	0.589352	0.528395	0.509089	0.74104	0.156111	-0.070366	-0.162201	0.486779
ARPP21	-0.0946584	-0.608837	-0.584316	-0.616181	0.170685	-0.0388527	0.136025	-0.058055	-0.492708	-0.482212	-0.439872	-0.517414	0.215138	-0.292934	0.158165	-0.0393096	-0.401034	-0.36805	2.08288	-0.489713	0.158939	-0.182331	0.0168864	-0.0776109
ARR3	0.255334	-1.09621	0.494168	-0.361366	-0.350765	0.506662	-0.221356	1.0392	-0.913669	-0.370361	0.485519	0.189966	-0.164242	-0.578894	-0.172472	1.27751	-0.932347	-1.27089	-1.29708	-1.10552	-0.173722	-0.516154	-0.260038	0.577143
ARRB1	-0.977609	1.80709	2.45449	0.42231	-0.27833	-0.402286	-0.160619	-0.459899	-0.838406	-0.631583	0.163338	0.228906	1.18188	-0.532659	-0.130271	-0.462959	-0.844008	2.45054	1.98612	-1.02589	1.60412	0.307507	-0.225291	-0.348494
ARRB2	0.345695	0.199643	0.301895	0.150572	-0.492277	-0.026211	0.412904	0.183936	0.452868	0.344596	0.439885	0.302183	-0.674217	0.0914379	0.0752016	-0.461451	0.126542	0.00773072	0.345144	-0.575196	-1.04952	-0.613763	-0.444689	-0.714996
ARRDC1	0.218385	0.238669	0.27552	0.311813	-0.238691	0.228952	-0.0583699	0.0393148	0.187662	0.179944	0.337795	0.477512	-0.488106	0.409423	-0.405959	-0.452435	0.093403	0.300279	0.472722	0.147453	-1.17836	-0.697739	-1.18273	-1.15407
ARRDC1-AS1	0.0630551	0.0243505	0.0496472	-0.00772966	-0.750267	-0.543096	-0.497427	-0.270031	0.27167	0.240182	-0.0206177	0.200638	-0.682743	-0.408719	-0.538148	0.0860709	0.610454	0.678085	0.341225	0.710364	-0.265947	0.450568	-0.131169	0.276288
ARRDC2	0.368475	1.19144	0.995016	0.307647	-0.672004	-0.943032	-0.181837	-0.372727	0.644152	1.5509	1.46522	0.722723	-0.224294	-0.562163	0.851018	0.0229738	-1.97011	-1.65319	-0.581751	-1.79523	-2.7165	-2.92576	-2.94018	-2.81256
ARRDC3	0.695462	0.267909	0.909532	0.817196	0.424217	-0.0796978	-1.37935	-0.267514	0.854152	0.18281	0.598593	1.06457	-0.253734	-0.151755	-1.95126	-0.433263	0.202645	0.175766	0.107097	0.215263	-0.166772	-0.723251	-0.533644	-0.980826
ARRDC3-AS1	-0.55103	-0.543064	-0.501727	-0.54482	-0.000509247	0.0418286	0.18466	0.0533569	-0.428157	0.239774	-0.273751	-0.519709	0.204162	-0.173526	0.240925	0.0646111	-0.299292	0.464817	-0.375278	-0.560486	0.156516	-0.210911	0.108875	0.0162807
ARRDC4	0.429558	0.759243	1.19452	0.322328	-3.18699	-4.15521	-1.00988	-1.48369	2.14875	2.46567	2.55457	1.83023	-0.38366	0.0922846	1.93216	1.97843	-2.24035	-1.52677	2.12762	-3.73078	-2.55594	-2.93878	-2.61724	-2.98687
ARRDC5	0.258689	0.149396	0.67621	0.202853	-1.49193	-0.405818	-0.685382	-0.381773	1.49356	1.68364	1.90619	1.86928	-0.549989	0.950855	-0.127722	0.927547	-0.170706	0.461289	0.984341	-0.276946	-1.50331	-0.0189809	-0.598145	-0.398618
ARSA	-0.224077	-0.210223	-0.161984	-0.188113	-0.634295	0.141752	0.730626	0.371179	-0.339558	-0.457834	-0.485835	-0.212029	-1.31249	-0.676746	0.100739	-0.594994	1.46536	1.67907	1.68308	1.58684	0.89319	1.24492	1.11694	1.15668
ARSB	-0.140836	0.0845389	0.047179	-0.573165	-1.07197	-1.06636	-0.322668	-0.622464	0.178245	0.305218	-0.149494	-0.0491699	-0.846099	-0.198369	-0.141621	0.0552355	1.4705	1.50166	1.3164	1.33395	1.1116	1.08407	1.52821	1.69965
ARSD	0.552288	0.825638	0.524457	-0.48943	-0.535475	0.278611	-0.0697197	0.345008	0.362551	0.783845	0.635762	-0.172061	-0.620192	0.576246	-0.116745	0.62018	-0.866009	0.0932633	-0.719366	-2.31425	-1.64673	-1.66829	-1.19221	-1.98238
ARSD-AS1	0.454118	-0.603094	-0.313293	-0.687681	0.000171912	-0.0658399	0.117508	-0.0534127	0.569618	-0.507457	-0.369796	-0.617309	0.131456	-0.331624	0.164094	-0.113975	-0.406528	-0.580197	-0.511185	-0.66827	0.10688	-0.271342	0.00657308	-0.0866207
ARSE	-0.363125	-0.353164	-0.352194	-0.203315	1.35097	0.47665	1.29447	1.56233	-0.212514	-0.169425	-0.0662074	-0.243706	0.69091	0.170813	0.703467	0.441167	0.0314605	-0.194478	-0.335946	-0.179377	0.806309	0.259392	0.602004	0.484876
ARSEP1	-0.451241	-0.435157	-0.390389	-0.274614	0.286095	0.35109	1.87023	0.356756	-0.351499	-0.330749	-0.226288	0.0690386	0.442451	0.169754	0.64494	0.352399	-0.199662	-0.366024	-0.163015	-0.15911	0.485024	0.148174	0.497098	0.324766
ARSF	-1.19416	-0.0949591	-1.02862	-1.54787	-0.817431	0.541605	0.974307	-0.263154	-1.4722	-1.39565	-1.22729	-1.04643	-0.345988	0.412789	-0.318643	-1.03663	2.2263	2.51658	2.5974	3.22287	2.33538	2.79573	2.47659	2.7134
ARSG	1.22355	0.34611	0.245874	0.773758	-0.392505	0.191598	-1.63301	-0.97588	-0.00356731	-0.767136	-0.977789	-0.256663	-1.67325	-0.448211	-3.43229	-2.00405	2.2712	2.19822	1.61257	2.39045	1.25765	1.26762	-0.127982	0.242078
ARSH	0.50925	-0.825399	-0.794285	-0.801835	-0.125465	-0.185288	-0.00859872	-0.258717	-0.697975	-0.694566	-0.633282	-0.513071	0.0242173	1.00095	0.0147683	-0.274361	-0.668625	0.24985	-0.950105	-0.766563	-0.0235697	1.65626	-0.114678	0.838629
ARSI	0.192767	-0.441824	-0.391685	-0.454947	0.262592	0.153036	0.235068	0.0976039	-0.315662	-0.301139	-0.265565	-0.398029	0.953039	-0.0635322	0.415612	0.129617	-0.162918	-0.34019	-0.162201	-0.330263	0.286299	-0.0362446	0.120438	0.0584987
ARSJ	-0.659749	-0.643542	0.142082	-0.449192	0.10908	0.159091	0.263406	0.157913	-0.304456	-0.538618	-0.408274	-0.398847	0.244281	-0.0518948	0.368824	0.122954	-0.458764	-0.673646	-0.552075	-0.384594	0.260393	-0.0477825	0.234804	0.100465
ARSK	0.771043	0.281825	0.248851	0.461951	-0.5756	-0.573622	-0.566185	-0.379205	0.969319	-0.997449	-0.288431	0.735738	-0.236972	-0.28353	-0.632373	-0.367331	0.457882	0.397676	0.743632	0.92175	-0.0443449	-0.531712	-0.248682	-0.340363
ART1	0.085408	-0.112242	-0.19118	-0.382935	0.211708	0.270232	0.317487	0.208139	-0.165062	-0.138836	0.0439096	-0.33943	0.342974	0.074016	0.354502	0.203967	0.0777531	-0.126015	-0.122507	-0.280902	0.351616	0.500299	0.255348	0.174908
ART3	-0.325222	-0.294991	-0.26802	-0.372142	0.355238	0.235068	0.353954	0.232605	-0.20274	-0.198667	-0.0758574	-0.301406	0.45877	0.530475	0.464824	0.263747	-0.043877	-0.174202	-0.0559645	-0.220458	0.46118	0.0593136	0.327678	0.226049
ART4	-0.552473	0.65758	-0.48487	-0.612982	-0.0591005	-0.00923707	0.151664	0.0199551	-0.424795	-0.429732	-0.264262	-0.107008	0.20363	-0.254439	0.21562	-0.117042	0.254777	-0.462601	-0.364361	-0.639885	0.105095	0.281412	0.0746462	0.364223
ART5	0.226202	-0.85349	-0.360292	-0.0468397	-0.00386695	-0.0667172	0.076889	0.433429	-1.09018	-0.236568	-0.953862	-0.155657	-0.407402	2.1888	-0.0315406	0.383964	0.36116	-0.601993	-2.01407	0.497555	-0.197716	2.37663	-0.336826	0.177748
ARTN	0.187026	0.680055	0.490145	0.309989	-0.331653	1.48809	0.71446	0.954757	0.0571977	0.173453	0.216376	-0.130817	-0.684428	1.96092	0.241912	0.246691	0.082823	-0.00372043	-0.023619	-0.0498489	-0.890545	1.23673	-0.319636	-0.548775
ARV1	0.183976	-0.423316	-0.224111	0.211479	0.0998017	0.221494	-0.967647	0.217379	0.19409	-0.820806	-0.224941	0.48051	-0.385033	-0.207317	-1.94292	0.242194	0.597086	0.18683	0.333339	0.750008	0.632627	0.529039	0.644783	0.858203
ARVCF	-0.0370857	0.859712	-0.393528	0.0781142	-0.569137	-0.172155	-0.262973	-0.559978	0.16376	0.653022	0.189862	0.617485	0.187964	-0.59918	-0.34902	-0.844606	0.111757	0.229822	0.480115	-0.201815	-0.352795	-0.438507	-0.109048	-0.614248
ARX	-0.784438	-1.69786	-0.133426	0.574357	0.0367662	0.145612	0.198638	-1.20518	-1.56976	-0.00191806	-0.769091	-0.385835	-0.42488	0.444395	0.712059	0.167822	0.437132	0.50167	-0.355513	0.832467	-0.661128	0.789222	-0.130029	-0.721152
AS3MT	0.236724	0.24456	0.490382	0.0931012	0.249236	1.38294	-0.136231	-0.637769	0.728002	0.376727	0.281014	0.146686	-0.274361	0.433757	-0.177514	0.105032	0.144633	0.310094	-0.736625	-0.701066	-0.357399	0.410592	-0.29011	-0.510903
ASAH1	0.185697	0.27358	0.160334	0.414339	-0.0420455	-0.260808	-0.311287	0.383482	0.259643	0.225872	0.174909	0.205078	-0.188522	-0.580348	-0.231394	0.331962	-0.225549	0.323708	-0.00983586	0.180963	-0.728048	-1.25142	-1.32145	-1.25583
ASAH2	0.174346	0.137189	0.240451	-0.0104175	-0.398295	-0.974437	-0.695359	-0.944768	0.384079	-0.166219	0.476466	0.106629	0.410814	-0.276625	-0.765244	-0.808255	1.15486	0.450746	1.22059	0.703898	1.09564	0.543076	1.19195	1.19827
ASAP1	0.318387	0.382092	0.140601	0.503328	-0.72616	-0.300328	-0.0924831	0.144398	0.369615	0.380362	0.324708	0.0707795	-0.583767	0.426244	-0.0147287	0.393983	-1.47797	-1.35769	-1.74662	-0.736309	-1.40931	-1.91055	-1.40728	-1.08245
ASAP1-IT1	0.529828	0.561008	0.520656	0.874485	-0.596899	0.0101544	-0.140836	-0.420078	0.441242	0.7363	0.329028	0.297667	-0.374534	0.675226	0.885895	-0.511313	-1.76913	-1.87696	-1.37484	-1.98784	-2.54605	-1.36873	-2.09884	-1.79523
ASAP2	-0.327177	0.127173	-0.277617	-0.351469	0.309202	0.272427	0.38781	0.273712	-0.201761	-0.208022	-0.0198155	-0.304705	0.438578	0.0286808	0.479437	0.278181	-0.034179	-0.16044	-0.0811064	-0.11589	0.493826	0.0686526	0.341067	0.266074
ASAP3	-0.00056407	0.505176	0.480693	0.290074	0.627512	-0.0721323	0.29622	0.708214	0.527128	-0.0543431	0.233892	-0.890055	-0.106338	0.426884	1.58375	0.366773	-0.834008	-0.0685687	0.0612545	0.0574635	-0.726475	-0.524127	-0.481666	-0.520671
ASB1	0.280047	0.241451	0.000611885	0.0626505	-0.486454	-0.335463	-0.384427	-0.449341	0.557973	0.444782	0.3668	0.389135	-0.236282	0.201505	-0.408021	-0.224484	0.00141726	0.0501543	-0.194236	0.280863	-0.54425	-0.295706	-0.700348	-0.752728
ASB10	-0.54837	-0.662222	-0.307876	-0.117082	0.102287	0.800781	-0.128309	-0.389235	-0.421231	-0.264967	-0.594828	-0.210125	-0.113512	0.469682	-0.175868	-0.0430939	0.208937	-0.00205606	-0.95294	0.360513	0.54806	0.998073	0.64856	0.0884713
ASB11	-0.40514	-0.393742	-0.357926	-0.295879	0.397515	0.366261	0.424622	0.279051	-0.282627	-0.284899	-0.100099	-0.278253	1.11921	1.35364	0.490807	0.74733	-0.116937	-0.284171	-0.219029	-0.214828	0.583038	0.142279	0.505021	0.56511
ASB12	0.906824	1.83407	1.64583	0.280492	-0.809848	-0.969661	0.0321355	0.550259	-1.30834	1.63038	0.989056	0.277509	-0.606713	-1.1204	0.484156	-0.591417	0.197768	0.12842	-0.397677	-1.70812	-0.509853	0.534036	-0.102759	-0.350124
ASB13	0.500125	0.100288	0.366895	0.519555	0.189477	0.142588	-0.36689	-0.907679	0.650229	0.308723	0.423993	0.705745	0.955744	0.414346	-0.0430939	0.0491674	-0.892591	-0.447543	-1.46998	-0.553482	-0.868484	-0.156408	0.709626	-0.852184
ASB14	-0.983172	-0.232816	0.454461	-0.95439	-0.275612	-0.327519	1.02098	-0.38732	-0.844111	0.413591	0.468104	-0.383238	-0.0830579	0.519092	-0.0818583	0.286765	-0.269376	-1.15584	-0.687478	-0.947738	-0.110522	-0.425865	-0.186745	-0.282504
ASB15	0.321363	-1.2465	0.388105	-0.177089	-0.545645	-0.625099	-0.300244	0.625193	1.55414	0.864474	1.35782	0.145068	-0.308111	-0.763402	0.730342	-0.327532	-1.10585	0.952001	-1.50442	-1.32544	-0.25961	-0.660416	-0.0832371	-0.176892
ASB16	-0.571982	-0.172009	-0.940428	-0.186711	-0.250417	0.220626	-0.553739	-0.121776	-0.288694	-0.190605	-0.631817	-0.219007	-0.286254	-0.0159599	-0.276387	-0.390739	0.509353	0.311351	-0.05498	0.880223	1.00688	0.984196	-0.20429	0.637572
ASB16-AS1	0.478667	0.0847068	0.18973	0.559529	-0.722788	-0.259883	-0.352319	0.210085	0.374387	0.175117	0.352644	0.574023	-0.523983	0.520693	-0.537462	0.581076	0.264169	-0.00734156	-0.058913	0.180213	-0.520559	-0.0433431	-0.452269	-0.14746
ASB17	-0.383934	-0.383358	-0.345892	-0.224077	0.330948	0.443945	0.501002	0.392324	-0.293173	-0.277507	-0.177739	-0.0255063	0.515859	0.241632	0.600864	0.422986	-0.116138	-0.280825	-0.278594	-0.105748	0.583897	0.234613	0.482742	0.419007
ASB18	-0.415981	-0.0849268	-0.13767	-1.86489	1.086	0.300922	-0.353303	-0.590802	0.100491	-0.645633	0.182159	-0.0664701	0.325953	0.491536	-0.154603	0.559723	0.220422	0.481976	-0.985076	-1.00069	1.63869	0.415429	0.669567	-0.269827
ASB2	-0.36117	-0.276049	-0.881704	0.104235	1.10083	1.00743	0.47759	-0.0381106	-3.40123	-4.84478	-4.99502	-3.39083	-0.617046	-2.02183	-1.88383	-3.2433	4.29536	3.27057	2.2712	3.43553	3.99501	3.16821	1.49944	0.788908
ASB3	0.485112	0.318972	0.317409	0.376841	-0.947515	-0.32241	-0.4402	-0.567449	0.478856	0.483604	0.394081	0.379423	-1.07394	-0.0373989	-0.226846	-0.363904	0.505607	0.212219	0.228982	0.268006	-0.740024	-0.175943	-0.669308	-0.0237315
ASB4	-0.506857	0.230453	-0.0275014	-0.503483	0.0907065	0.113313	0.941693	0.0947532	-0.171315	-0.393069	-0.311826	-0.46193	0.231079	-0.10802	0.243536	0.784602	0.411364	-0.471483	-0.314068	-0.460123	0.529911	0.300397	0.299354	0.498149
ASB5	-0.288449	-0.288398	-0.252583	-0.270688	0.426575	0.34291	0.489519	0.351779	-0.151133	-0.11687	-0.0688474	-0.212315	0.628386	0.171116	0.641764	0.3742	0.00984993	-0.147874	0.0807111	-0.112571	0.598086	0.156433	0.49088	0.348697
ASB6	0.558624	0.306155	-0.0451623	0.674728	-0.278963	-0.209111	-0.709343	0.0222576	0.299863	-0.262676	-0.427069	0.633197	-0.256961	-0.536479	-1.19535	-0.17872	0.496633	0.0564677	-0.0213321	0.397676	-0.434235	-0.113962	-0.553772	-0.5892
ASB7	0.116131	0.182205	-0.0173149	0.051403	-0.519653	-0.276238	-0.328857	-0.425122	0.383269	0.396635	0.291626	0.308723	-0.486545	-0.453678	-0.362332	-0.321701	0.551027	0.397085	0.476161	0.517852	-0.529825	-0.501293	0.0196942	-0.327211
ASB8	-0.0951788	-0.0174958	0.134546	0.195278	-0.131654	-0.563351	-0.336019	-0.540868	0.280063	0.277085	0.163407	0.151783	-0.0584735	-1.46261	-0.552345	-1.03723	0.759179	0.847467	0.480875	0.743015	-0.0753833	-0.144947	-0.157317	-0.551698
ASB9	-0.504403	-0.539516	-0.50137	-0.525446	0.966259	0.531592	0.162523	0.0262325	-0.40369	-0.404639	0.180608	-0.466007	0.230754	-0.11408	0.173741	0.0154646	-0.27784	-0.489148	-0.421615	-0.421739	0.189501	-0.0958424	0.0456095	-0.0117661
ASB9P1	-0.288892	-0.313274	-0.220258	-0.365715	0.227165	0.270965	0.305353	0.21236	-0.190796	-0.165244	-0.0140184	-0.323328	0.353225	0.130454	0.334101	0.215393	0.0220139	-0.152455	-0.0733516	-0.261031	0.32855	0.0644499	0.237784	0.15709
ASCC1	-0.0414192	0.0109098	-0.450899	0.135576	-0.347135	-0.903194	-0.556698	-0.276886	0.202932	0.197037	-0.0556821	0.401738	-0.125822	-0.868865	-0.709595	-0.115116	0.801212	0.657835	0.676462	0.94079	0.356627	0.176901	-0.221558	0.461698
ASCC2	0.299444	0.341209	0.209938	0.212828	-1.02571	-0.937972	-0.673874	-0.376572	0.330315	0.196166	0.272928	0.340937	-0.937482	-0.734541	-1.00383	-0.552068	0.730477	0.46026	0.205915	0.531299	-0.527747	-0.0805325	-0.200894	-0.258571
ASCC3	0.167171	0.174762	0.169914	0.0142379	-0.400194	-0.22451	-0.174154	-1.07947	0.227734	0.399002	-0.0012136	0.0452215	-0.30037	0.330728	0.306902	-0.629347	0.657627	0.586455	0.0428855	0.232548	-0.0933502	0.370431	0.208248	0.158595
ASCL1	-0.523155	-0.49546	-0.487146	-0.458492	0.217379	0.159467	0.252072	0.97617	-0.420254	-0.415999	0.0634213	-0.393851	0.298629	0.922899	0.285208	0.155327	0.117469	-0.461019	-0.436268	-0.335167	0.305667	-0.028405	0.168163	0.697137
ASCL2	3.07763	1.80491	-1.21558	1.7264	0.0831347	2.90566	0.326484	0.84931	1.71158	-0.991401	-3.21493	0.412416	2.02721	2.97132	-0.442184	0.233038	-1.43794	0.0466983	-1.27789	-3.09349	-4.01342	-2.59099	-3.07237	-3.78567
ASCL3	-1.02244	-1.05986	0.381684	-0.348251	-0.382167	1.10905	-0.117692	-0.366181	-0.873586	0.601435	0.574226	-0.89296	-0.128037	0.442826	-0.0780714	-0.446162	-0.866477	0.261918	0.162055	-1.05002	-0.127671	1.4219	-0.181274	-0.291303
ASCL4	-0.383554	-0.408805	-0.38822	-0.325421	0.232948	0.35258	0.424284	0.337796	-0.254572	-0.229644	-0.172224	-0.334612	0.473397	0.51176	0.493394	0.254494	-0.067307	-0.288719	-0.322377	-0.316372	0.578361	0.123127	0.399482	0.311742
ASF1A	0.238925	0.383132	-0.302505	0.219237	1.361	0.0185977	-0.920746	0.260719	-0.494584	-0.558532	-1.56364	0.763969	0.912623	-1.26051	-0.90945	-0.221648	1.06902	0.676954	0.273862	0.607381	0.959838	-0.214744	-0.700562	0.482742
ASF1B	-0.194192	-0.695	-0.744372	-0.106947	-0.65548	-0.344854	0.298063	0.239833	-0.0760673	-0.705377	-0.818965	0.0187225	-0.861032	-0.450546	-0.304705	0.282927	3.75098	2.4142	2.13527	3.4573	3.69834	4.11536	4.28779	4.07022
ASGR1	-0.890841	-0.858311	-0.254443	-0.69737	-0.330277	0.313122	0.0099966	-0.265667	-0.83111	-0.82988	-0.719403	-0.814726	0.252847	-0.0219687	0.443794	-0.0593974	0.0480898	1.3247	1.92225	0.0449109	-0.0412712	0.250417	0.0222842	-0.145598
ASGR2	-1.69534	-2.35052	-0.702743	-1.47849	-0.734293	0.0198966	-0.94888	-0.0296904	-1.71402	-1.05552	-1.139	-1.21007	0.795458	-0.178469	1.49356	-0.378323	0.331993	2.61255	4.08984	0.775178	0.207428	1.11694	-0.228766	0.402966
ASH1L	0.321	0.427637	0.536416	0.148925	0.490436	-0.00402774	-0.230135	-0.919588	0.542416	0.649732	0.661706	0.578433	0.332397	-0.412631	0.245784	-0.692008	-0.908783	-0.757734	-0.995957	-0.970326	-0.671362	-0.88146	-1.08977	-1.59223
ASH1L-AS1	0.0388143	0.53907	0.760801	-0.276926	-0.427707	-0.977609	0.0526434	0.128143	0.158487	0.759625	0.973866	0.0284897	-0.851471	-0.58959	-0.132022	0.510494	0.208383	0.487152	0.429695	0.0882689	-0.318659	-0.301067	0.111661	-0.25597
ASH2L	-0.0215743	-0.195819	-0.278216	0.075735	-0.348159	-0.282924	-0.741191	0.196861	0.14105	0.0247229	0.157995	0.424265	-0.104883	-0.367331	-0.487419	0.347425	0.354238	0.10688	0.339741	0.311871	-0.170778	0.0930655	-0.115218	0.433543
ASIC1	-0.795927	-0.065655	1.055	0.0925129	-0.228392	-0.277918	-0.0167158	0.928733	0.464426	-0.677751	-0.572103	0.198339	1.39396	-0.420135	0.0505838	0.623175	-0.00908352	0.117098	-0.677925	-0.886249	-0.0685303	-0.409217	-0.101451	0.864313
ASIC2	0.304334	-0.0288064	-0.0699968	0.931903	-0.261314	0.175535	-0.63477	-0.431859	-0.0315406	0.338283	0.851636	-1.53268	-0.596171	1.43133	0.344302	-1.20706	0.308422	0.388811	-0.293021	0.583245	-0.539629	1.53227	0.791725	-0.848434
ASIC3	0.453438	0.625302	0.342463	0.273642	-1.11605	-0.132841	-0.727424	-0.925304	-0.727823	0.0617175	-0.15571	-0.0215427	-1.38438	0.580273	-0.337171	-0.384411	0.66989	1.18572	0.241466	0.424746	-0.351616	1.91672	-0.281612	0.763932
ASIC4	-0.111582	-0.0724908	0.19171	0.0106762	1.9879	0.302081	1.04962	-0.104179	0.181637	0.219009	0.540798	0.413539	2.08624	0.761684	0.802308	0.414807	-1.13434	-0.98829	-0.222811	-0.75813	0.425066	-0.534913	-0.483394	-0.792704
ASIC5	-0.522894	-0.273494	-0.524968	-0.564986	0.209899	0.0394015	0.156579	-0.0208482	-0.4154	0.434244	-0.383297	-0.481031	0.253678	-0.206244	0.162143	0.00954169	-0.302671	-0.503502	-0.418839	-0.420059	0.213093	-0.11134	0.028745	-0.028405
ASIP	0.0840646	0.34181	-0.682167	0.419134	1.19452	0.565904	-0.465151	-0.814937	0.768983	0.375951	-0.909244	0.849911	0.0767569	-0.276693	0.017575	0.103171	-0.137429	-0.0919004	1.03014	0.055981	-0.396473	-0.173017	-0.374667	-0.65185
ASL	-0.215869	0.084407	-0.360525	0.148315	-0.090029	-0.228392	0.66582	0.466383	-0.505601	0.0780026	-0.63322	-0.144932	-0.790861	-0.592682	-0.397036	-0.704304	1.18798	1.24406	1.14354	1.19349	0.329608	0.701801	0.710364	0.662692
ASMT	1.11597	1.35262	-0.0270401	1.35441	0.568517	-0.207967	-1.02297	-0.703888	-1.93901	0.122954	-1.83151	-1.18521	-3.25488	-1.30765	-3.72319	-0.716297	2.18152	2.31223	1.11245	2.01924	0.318096	0.0489712	-1.07066	-0.0723283
ASMTL	0.204823	0.105998	0.342792	-0.0267534	-0.218012	-0.175864	-0.0194618	-0.541975	0.698608	0.439234	0.884129	0.537474	-0.17657	0.217542	-0.129528	-0.458988	0.15791	0.152573	0.797736	0.11312	-0.41368	-0.222483	-0.386143	-0.605318
ASMTL-AS1	0.694291	1.29514	1.38801	0.646541	-1.12912	-0.702225	-0.325933	0.354958	-0.203748	0.692635	0.611346	0.0175198	-1.46913	-0.79542	-0.36499	-0.252944	0.436363	0.902604	0.92414	0.122963	-0.807041	-0.727305	-0.715653	0.036717
ASNS	0.471408	0.668282	0.357097	0.420735	-0.595154	-0.33162	-0.776002	0.251112	0.286926	0.54482	0.40817	0.189808	-0.901759	-0.0668631	-0.5213	0.350263	0.473703	0.536935	0.503569	0.362362	-0.519474	-0.58482	-0.621006	-0.345626
ASNSD1	-0.0581808	0.157748	-0.0249043	0.0568092	-0.0565902	-0.279131	-0.509046	-0.760388	-0.00860737	0.358058	0.194995	0.267372	-0.333401	0.0947619	-0.488609	-0.699562	0.295216	0.37695	0.192559	0.42637	-0.144096	-0.177844	-0.159276	-0.13877
ASPA	-0.574989	-0.561197	-0.548817	-0.63184	0.184903	-0.0339062	0.14088	-0.0564586	-0.458515	1.14668	-0.400667	-0.520224	1.62651	-0.275184	0.175774	-0.0317139	-0.360248	-0.550408	-0.451117	-0.494519	0.187565	1.17256	0.0290093	-0.053157
ASPDH	0.332275	0.258435	0.767988	-1.01983	-0.355722	-0.420293	-0.130755	0.430161	-0.0721166	-0.0703512	-0.796023	-0.907247	0.392968	0.236618	0.896452	0.27319	-0.959868	-0.98772	-0.0611755	-0.304907	-0.15131	1.09457	1.15629	-0.337496
ASPG	0.41086	-0.706766	-0.659336	-0.822799	-0.0931565	1.09325	0.0211485	-0.231692	0.0199668	-0.597962	-0.502025	-0.359766	1.33165	1.4261	0.0814591	-0.265317	-0.552197	-0.750125	-0.602742	-0.39545	-0.0142452	0.669437	-0.0765878	1.53131
ASPH	0.784497	0.569161	0.925969	1.21958	-0.717466	0.37619	-0.848319	-0.36749	0.687442	0.464824	0.45643	1.35693	-1.21407	0.788796	-0.657345	-1.00663	-0.155512	0.0403697	-0.876235	0.301832	-0.642273	-0.282366	-0.440648	-0.161256
ASPHD1	-0.00284657	-0.327959	0.359984	0.393856	-1.15889	0.316106	-0.881704	-1.42114	0.693925	0.0310508	-0.439624	-0.178349	0.0786064	-0.323994	-0.858572	0.181239	-1.83749	0.783352	0.620281	0.2066	0.634138	0.229048	-0.292323	0.918782
ASPHD2	-0.0249702	-0.432911	-0.0503101	0.280926	-0.663762	-0.267738	-0.528441	0.10202	-0.0762274	-0.705707	-0.790861	0.078869	-0.693162	-0.595371	-0.635838	-0.467378	0.698485	0.704012	0.788736	1.22403	-0.00609832	0.846265	0.121262	0.603563
ASPM	-1.0536	-0.730031	-1.33203	-0.852401	-0.28427	0.29719	0.61349	0.519555	-1.75294	-2.08818	-1.80649	-2.07527	-1.34741	-1.19638	-0.217917	-0.614845	5.86997	4.64243	4.02161	6.15465	6.81784	6.35643	5.47206	6.20803
ASPN	-0.472832	0.163298	-0.687906	-0.653056	0.300071	0.410308	0.0600153	-0.115989	-0.624324	0.05484	-0.503567	-0.514362	0.0564146	-0.265389	0.116274	-0.207369	-0.563102	0.075028	-0.754006	0.150579	0.767477	0.854467	0.617004	0.517319
ASPRV1	0.239328	0.125584	0.365709	0.115912	-0.445666	0.171873	-0.794704	-0.557002	0.482055	0.580152	0.467519	0.202096	-0.748558	0.109101	-0.455657	0.359649	0.525342	0.258994	0.425937	0.798964	-0.409029	0.164414	-0.698847	-0.333269
ASPSCR1	0.304106	0.148385	0.299769	0.150181	-0.462207	0.0796678	0.111287	0.229537	-0.196609	0.162368	0.0626103	0.0735082	-0.449061	-0.0390776	-0.415732	-0.485835	0.266355	0.62291	0.0519253	0.163342	-0.345305	0.303427	-0.370385	-0.25166
ASRGL1	0.165389	0.121114	0.138996	0.129407	-0.785279	-0.517887	-0.325212	-0.296152	0.250009	0.363591	0.211308	-0.0901794	-1.67159	-0.250856	-0.311457	-0.252867	1.29455	0.282798	0.315834	0.632519	0.31326	1.49944	1.59082	1.08676
ASS1	-0.267514	-0.313521	0.250307	0.158438	-0.357172	-1.4377	-0.453837	0.0964391	-2.09111	-1.7417	-1.92407	-2.27028	-0.606087	-2.33299	-0.317743	-1.15252	2.75698	2.58308	2.73657	3.15435	3.99029	2.12076	2.00632	2.00905
ASTE1	0.427637	0.261237	0.509962	0.194491	0.118155	0.314237	-0.422052	0.457696	0.781597	0.385749	0.768983	0.169677	0.262441	0.438512	-0.338292	0.989425	-0.904419	-0.545196	0.0161078	-0.081883	-0.809181	-1.10927	-0.866477	-0.853162
ASTL	0.291323	0.152776	-0.925038	-0.159505	1.12503	-0.280381	1.77227	-0.747413	-0.520351	1.15337	-0.951918	-1.15389	1.18614	0.82697	2.02845	-0.785414	-1.21092	1.21763	1.3756	-1.36365	-0.323898	-0.69737	0.59935	0.237305
ASTN1	-0.41011	-0.425381	-0.370724	-0.386113	0.194022	0.237976	0.320237	0.217152	-0.305838	-0.300648	-0.201221	-0.340424	0.341072	0.0196685	0.405996	0.205502	-0.139584	0.183962	-0.179626	-0.284955	0.357261	0.0208007	0.288179	0.188512
ASTN2	-0.137026	-0.32837	0.207582	0.078408	1.02509	-0.462448	-0.109044	-0.444551	-0.270124	-0.462204	-0.679636	0.133452	0.0788177	-0.781134	-0.538097	-0.37352	2.1519	1.75704	1.18764	2.01156	1.89369	1.06381	1.1724	1.62412
ASTN2-AS1	-0.456559	-0.457388	-0.451002	-0.348646	0.166276	0.285741	0.369697	0.251694	-0.31343	-0.349319	-0.208532	-0.343535	0.40629	0.0254092	0.456462	0.225192	-0.167523	-0.384447	0.179041	-0.299623	0.468356	0.0406755	0.336404	0.279073
ASXL1	0.135079	0.275303	0.226392	-0.286624	-0.784705	-0.566774	0.574765	0.0650944	0.0537361	0.0177509	-0.131234	-0.363942	-1.67724	-0.600618	0.174723	-0.905093	0.691132	0.478305	0.259568	0.371344	-0.00718341	0.919066	1.56486	0.908433
ASXL2	0.312823	0.481565	0.584843	0.3411	0.222786	0.103324	-0.413166	-0.290386	0.632881	0.507324	0.699959	0.499846	-0.516229	-0.077714	-0.0648648	0.0627378	0.314255	-0.0616395	-0.598838	0.239273	-0.341475	-0.693689	-1.03663	-0.892262
ASXL3	-0.350627	-0.355616	-0.330419	-0.251979	0.312797	0.439746	0.459123	0.381145	-0.246423	-0.239345	-0.170249	-0.217371	0.5025	0.236704	0.591725	0.374945	-0.0712824	-0.25021	-0.228218	-0.128604	0.571249	0.220383	0.46808	0.391776
ASZ1	-0.432587	-0.42518	-0.375719	-0.268574	0.311727	0.363112	0.481799	0.365635	-0.341142	-0.314241	-0.208924	-0.218881	0.462134	0.673731	0.657887	0.365907	-0.176045	-0.346212	-0.199906	-0.15787	0.518511	0.162376	0.507865	0.337535
ATAD1	0.173897	0.0729361	0.230718	0.368358	0.101957	0.205365	-0.684155	-0.269751	0.122213	-0.0370116	0.0682346	0.196446	-0.323125	0.209173	-0.550262	-0.610649	0.425249	0.378548	0.369674	0.635336	-0.314423	-0.297681	-0.29202	-0.0461315
ATAD2	-0.0830409	-0.0227976	-0.158452	0.0813398	-0.382083	-0.275569	-0.302617	-0.0907765	-0.0387129	0.0892034	-0.205844	0.110497	-0.469134	-0.237219	-0.236708	-0.447825	1.44737	0.945223	0.795443	1.49984	1.76449	1.8498	2.40916	2.37823
ATAD2B	0.257617	0.267981	-0.0446994	0.17765	0.161808	0.206136	-0.229044	0.182279	0.187241	0.456886	0.0930042	0.400609	-0.171282	0.296859	-0.0498405	0.169362	-1.36378	-1.51619	-0.815968	-1.12726	-1.80988	-1.93154	-2.16467	-1.87696
ATAD3A	0.0781326	0.0355919	-0.0266721	0.0532371	-0.652618	0.176593	-0.00735696	0.0626934	-0.0303176	-0.0269263	0.0416848	0.0964757	-0.903567	-0.00114881	-0.201221	-0.264522	0.836205	0.31588	0.21111	0.7359	0.767977	1.23581	1.68764	1.21763
ATAD3B	0.222615	0.136102	0.0244152	0.118961	-0.814064	-0.114558	-0.244127	0.0808704	0.134895	0.0680697	0.0713933	0.130793	-1.02938	0.064674	-0.188414	0.0559572	0.472887	0.0664635	-0.404561	0.339597	0.0145474	0.599274	1.04998	0.76197
ATAD3C	-0.00706376	-0.0159694	0.351457	0.431907	0.20678	0.224044	-0.591405	-1.09991	-1.14914	-0.769734	-1.11071	-0.111839	-0.969665	-0.686571	-1.22049	-0.35018	1.78574	1.32326	1.55326	1.91631	1.36512	0.999521	1.1327	0.498713
ATAD5	0.169654	-0.645665	-0.0392677	-0.190071	-0.316151	-0.661075	-1.69112	-0.7494	0.493705	0.191927	0.291413	0.242194	-0.236387	0.177683	-0.699674	-1.33715	1.173	0.161021	0.723307	1.09451	2.12076	1.78848	2.08194	1.95473
ATAT1	0.852397	0.744233	0.457198	0.72726	-0.471823	-0.296635	-0.709984	0.584312	0.562469	0.428297	0.330923	0.712638	-0.536589	0.0529143	-0.639002	-0.148904	-0.243891	0.087268	0.362294	-0.0308941	-1.10255	-0.507596	-1.01771	-0.221369
ATCAY	-0.0154084	-0.603378	-0.556166	-0.186304	0.126576	0.388168	0.223491	0.099274	-0.508035	-0.491634	-0.230266	-0.430848	0.232447	0.111122	0.27591	0.649362	-0.397776	-0.582704	-0.46726	-0.365268	0.220335	0.46694	0.823066	0.209128
ATE1	-0.179345	-0.0175759	-0.236474	-0.2095	0.641242	-0.585323	0.532796	-0.397783	-0.235144	-0.292389	-0.280409	-0.15998	-0.0340743	0.251229	0.0860227	-0.779453	0.634466	0.356523	0.199818	0.672539	1.14577	0.24065	0.327052	0.767661
ATE1-AS1	0.364319	1.19791	-0.101816	-0.909112	0.9924	-0.39607	0.257738	1.65692	-0.277393	-0.0184308	-1.21069	-1.80964	-0.930736	-0.997185	-0.749412	1.40502	1.033	1.58608	0.362901	-1.91375	-0.142172	0.30788	-0.786824	0.531897
ATF1	0.378749	0.204823	0.306975	0.517022	0.0656889	0.00972019	-0.937281	-0.375351	0.537038	0.238888	0.325268	0.733168	-0.169755	-0.192619	-0.844485	0.021487	0.105236	-0.051945	-0.442947	0.411292	-0.40804	-0.833048	-0.690922	-0.750834
ATF2	0.0441483	0.187161	0.175342	0.083797	-0.52893	-0.421955	-0.470889	-0.63892	0.114427	0.339275	0.0719489	0.140979	-0.183552	0.299863	0.11637	-0.166854	0.701276	0.412593	0.557151	0.440561	-0.14049	0.159182	-0.398521	0.127703
ATF3	-0.153839	-0.130755	-0.865231	-1.39331	-0.802563	-0.579486	0.280137	1.5073	-0.360829	-0.893633	-0.935374	-1.50672	-0.809032	-0.46607	0.346449	1.11846	1.17111	1.4983	1.87341	0.664625	-0.248129	0.197845	0.0540507	1.53528
ATF4	0.0530161	0.285299	0.306575	-0.0116157	-0.346405	-0.0584389	-0.155227	-0.441667	-0.092687	0.0718244	0.116544	-0.114017	-0.945851	-0.551165	-0.444611	-1.04643	1.16221	1.07239	0.970829	1.02721	0.242484	0.732939	1.01484	0.621861
ATF4P4	-0.224308	-0.446895	-0.0978479	-0.66484	-0.817172	0.663334	0.588083	-0.0773996	-0.592073	-0.26967	0.34075	-1.20561	-0.417002	1.12226	-0.0369205	-0.217525	0.33408	0.283592	-0.539629	0.165522	0.801021	0.603485	1.11111	1.0107
ATF5	-0.201371	-0.334367	0.0208094	-0.0655891	0.0390884	0.839929	0.328143	1.21686	-1.50817	-1.72042	-1.41001	-1.44887	-2.01807	-0.954049	-0.910438	-1.80649	2.28746	2.06305	2.60477	3.17645	1.35437	2.07332	2.04284	2.3394
ATF6	-0.0943965	-0.105972	-0.0913625	-0.14936	-0.601006	-0.0113991	-0.344045	-0.301772	-0.211965	0.136398	-0.271855	-0.0532761	-0.566379	0.33658	-0.259198	-0.271306	1.13881	0.995593	0.997017	1.44132	1.04725	1.40696	1.6142	1.51051
ATF6B	0.305402	-0.0943965	-0.0323407	-0.164935	0.572763	-0.474803	-0.546367	-0.65641	0.428297	0.231891	-0.289311	0.19945	0.752971	-0.79283	-0.22825	-0.43793	0.368017	0.103219	0.911836	0.605841	1.17167	-0.0561913	-0.849342	1.59474
ATF7	0.29882	-0.0216467	0.0701712	-0.0199057	-0.604103	-0.491885	0.219538	-0.378814	-0.186779	-0.0867796	0.123642	-0.120604	-0.707988	-0.710201	-0.0959696	-0.567783	0.175239	0.158198	0.1731	0.172831	-0.183424	-0.0765417	0.303934	0.161133
ATF7IP	0.339114	0.327433	0.116463	-0.0641002	0.012268	-0.775121	-0.223201	-0.674182	1.23009	1.11102	0.620838	0.799318	-0.18043	-0.0693439	0.14391	0.138592	-0.476169	-0.397364	-0.587321	-0.887797	-0.443005	-1.013	-0.771589	-0.820762
ATF7IP2	0.271338	0.187686	0.304005	0.133963	-0.730825	-0.530854	-0.287478	0.0351212	0.565224	0.408102	0.447738	0.315859	-0.702277	-0.464496	0.481441	0.609316	0.450132	-0.0229153	0.467911	0.146651	-0.854252	-0.561629	-0.610869	-0.618278
ATG10	0.20218	0.0627357	0.340434	0.350272	-0.599291	-0.632522	-0.492646	-0.531094	0.272667	-0.0963506	-0.239779	0.58735	-0.578286	-1.12371	-0.138336	-0.307008	0.161753	0.591933	0.410055	0.861803	-0.114795	0.124413	-0.244919	-0.227022
ATG101	0.330614	-0.108977	0.00182606	0.241302	-0.440789	-0.360969	-0.49086	-0.106873	0.019533	-0.625152	-0.810338	0.0493299	-0.252773	-0.484692	-0.633993	-0.423013	1.10884	0.904084	0.810221	1.09128	0.15263	0.514907	0.082345	0.651361
ATG12	0.0205	0.30594	0.505464	0.366966	-0.226092	-0.340124	-0.426132	-0.218897	0.394246	0.359777	0.466039	0.579635	-0.160071	-0.391252	-0.529714	0.147834	-0.987304	-0.059495	-0.254141	0.175239	-0.606281	-0.41686	-0.779456	-0.530411
ATG13	0.0189917	0.101334	-0.0486971	0.135179	-0.65641	-0.807505	-0.271963	-0.131378	0.0070558	0.15754	-0.122195	0.0652826	-0.366132	-0.883633	-0.370088	0.162249	1.68256	1.60712	1.56967	1.6107	0.712538	0.579209	1.09451	0.680455
ATG14	0.248032	1.15365	-0.575985	0.212593	0.114606	0.762591	-0.731849	0.434769	0.612258	1.2698	-0.398482	0.272667	-0.681584	0.132114	-0.0458856	-0.7399	-0.79853	0.51026	0.34709	-1.70094	-0.480796	-0.415494	-0.47468	-0.891529
ATG16L1	0.243006	0.353196	0.171402	0.176662	-0.622843	-0.54425	-0.322197	0.058368	0.343662	0.555854	0.572796	0.481125	-0.575198	-0.173216	0.151659	0.360427	0.143881	0.120254	0.34734	-0.0103542	-0.698617	-0.605046	-0.400602	-0.139584
ATG16L2	0.33341	0.56128	0.601479	0.536237	-0.0636837	0.0850577	-0.438011	0.486032	-0.0852261	0.316956	0.454968	0.331508	-0.445552	0.0957936	-0.540991	0.07306	-1.3968	-1.03239	-1.29382	-1.14494	-1.58422	-1.2366	-1.55416	-1.70251
ATG2A	0.0228277	-0.00533022	-0.0542405	-0.014698	-0.385746	-0.410213	0.134337	-0.159291	0.0897571	-0.052974	-0.154518	0.0204059	-0.390004	-0.311279	-0.0831666	-0.443814	0.777102	0.736459	0.502783	0.57096	-0.175222	0.0569815	0.173075	-0.0437969
ATG2B	0.328257	0.258557	0.348873	0.442515	-0.627301	-0.547834	-0.624148	-0.695	0.434011	0.537038	0.5058	0.512541	-0.604736	-0.0971023	-0.399428	-0.263049	0.291082	0.472818	0.552956	0.49864	-0.779815	-0.919295	-0.639342	-0.710677
ATG3	0.00996569	-0.20462	-0.370638	0.0505913	-0.343896	-0.740644	-0.716213	-0.128573	0.1968	-0.327015	-0.31535	0.227251	-0.229915	-0.782542	-0.59951	-0.00841104	0.997017	0.839183	0.851302	1.10863	0.957244	0.574465	0.886367	1.03939
ATG4A	0.089648	-0.07947	-0.0285914	0.148638	-0.0399817	-0.0437667	-0.550687	-0.172317	0.110679	-0.000800745	-0.145842	0.278181	-0.492074	-0.244547	-0.681584	-0.431252	1.75745	1.85072	1.70701	1.93467	1.19292	1.242	1.22467	1.21264
ATG4B	0.247356	0.149922	0.143674	0.188784	-0.235012	-0.375101	-0.255974	0.231472	0.357212	0.161045	0.232322	0.29267	-0.308194	-0.297435	-0.561825	-0.238896	0.453617	0.378679	0.61215	0.455193	-0.407562	-0.0506492	-0.625344	-0.369191
ATG4C	-0.0799457	-0.0586763	0.00931999	-0.0746907	-0.0378055	0.535901	-1.42188	-0.672004	0.144587	-0.240491	-0.41635	0.199728	1.44379	-0.169831	-0.659032	0.12061	0.110293	0.0829845	0.167196	0.334563	1.17614	-0.400095	-0.518548	-0.0981565
ATG4D	0.2804	0.391227	0.433497	0.150885	0.229358	0.236235	0.299286	0.257581	0.165914	0.339973	0.434957	0.151996	0.152077	0.350403	-0.000287502	-0.400527	-1.15969	-1.51041	-2.38456	-1.70903	-1.35111	-1.39301	-0.70828	-1.39988
ATG5	0.318972	0.392218	0.322945	0.513227	0.0647647	-0.390552	-0.324879	-0.221356	0.367741	0.353269	0.28493	0.421639	-0.317388	-0.497726	-0.432063	-0.540628	0.433945	0.526259	0.780823	0.734609	-0.418504	0.221296	-0.32745	-0.422684
ATG7	0.394568	0.53821	0.287934	0.289525	-0.379936	-0.426864	-0.300071	-0.374761	0.207556	0.418147	0.118415	0.114624	-0.388168	-0.354914	-0.260663	-0.561718	0.0891172	0.0730172	0.177647	0.329109	-0.522174	-0.487428	-0.520725	-0.433983
ATG9A	0.149466	0.208201	0.191388	0.10923	-0.591405	-0.856384	-0.0499175	0.0577704	0.163603	0.212739	0.237974	0.111919	-0.244607	-0.998032	0.00600579	0.111855	0.610152	0.431293	0.550111	0.317576	-0.192658	-0.324045	-0.300472	-0.44348
ATG9B	0.39424	0.301742	0.512362	-0.402916	-0.0377199	0.452025	-0.0157696	0.246531	0.228826	0.340827	0.335971	-0.818045	0.792092	0.243462	0.941844	-0.203029	-0.7713	-0.351035	-0.287824	-1.47085	-0.896513	-0.808692	-0.506795	-0.895952
ATIC	0.107362	0.221034	0.190716	0.41866	0.17224	-0.097974	-0.469886	-0.291827	-0.0994411	-0.0343472	-0.301033	0.21581	-0.216837	-0.63091	-0.907247	-0.479893	0.61215	0.240559	0.287169	0.648867	1.05762	0.535741	0.797873	0.846639
ATL1	-0.180518	-0.0773996	0.0715889	-0.151895	-0.412115	-0.473565	-1.03488	-0.897032	0.086179	0.35775	0.499938	0.43833	-0.247831	0.332594	-0.395606	-1.17593	0.321502	0.829637	1.36019	0.76989	-0.24119	0.436041	-0.382875	-0.265507
ATL2	-0.033123	0.394017	0.0664408	0.247586	-0.134684	-0.650688	-0.321133	-0.786954	0.267078	0.940158	0.319678	0.59695	-0.539839	-0.445407	0.449925	-0.229683	-0.136115	-0.0367486	-0.0424176	0.399212	0.000577952	0.191589	-0.19849	-0.319513
ATL3	0.0225088	0.384174	0.12737	0.10954	-0.308432	-0.531514	0.165933	-0.416851	-0.0201986	0.164404	0.259643	-0.0245679	-0.607028	-0.838406	-0.260354	-0.754806	2.11464	1.98008	1.69303	2.23694	1.99556	1.89852	2.38516	2.03856
ATM	0.323208	0.442443	0.35221	0.376275	0.112124	-0.208245	-0.0652687	-0.31209	0.103392	0.346776	0.246992	0.289325	0.10991	0.451689	-0.0222834	0.199495	-1.63051	-1.52309	-1.14308	-1.71926	-1.17045	-1.43731	-1.44418	-1.21057
ATMIN	0.175342	0.360071	0.0424495	-0.0153469	-0.0989514	-0.291733	-0.378294	-0.414463	0.106109	-0.00511431	-0.0507849	-0.0475022	-0.254481	0.0317501	-0.764418	-0.44211	0.799552	0.787196	0.584988	0.798615	-0.00372043	0.309551	-0.212343	0.453267
ATN1	1.23667	1.44363	1.27156	0.839929	-0.628983	-0.537869	-0.544996	-0.985532	1.06559	1.20118	1.16907	0.82001	-0.330137	-0.0322068	-0.152294	-0.0963506	-0.997392	0.318505	0.241706	-0.284724	-1.93154	-1.30128	-1.47287	-1.63466
ATOH1	-0.347947	-0.35587	-0.339204	-0.23881	0.295984	0.463585	0.530257	0.419438	-0.220805	-0.208568	-0.13447	-0.234855	0.574387	0.211849	1.18235	0.384794	-0.0170851	-0.234291	-0.257247	-0.167143	0.702827	0.237784	0.529431	1.21367
ATOH7	-0.549096	-0.595928	-0.53228	-0.583604	-0.0114966	0.0812821	0.133007	0.0243505	-0.450233	-0.441746	-0.366319	-0.540991	0.159822	-0.142904	0.155694	-0.0760673	-0.317265	0.529348	-0.505129	-0.570624	0.102773	-0.166504	0.0254844	-0.0523952
ATOH8	-0.290443	-1.26831	-0.0852135	-0.112045	-0.671432	0.392324	0.826585	0.221326	-0.459743	0.0645228	-1.04907	-0.413519	-0.450352	0.729897	-0.0500524	0.095201	0.377964	-0.0393852	-1.42821	0.183026	0.153029	0.582726	-0.0244856	0.927344
ATOX1	-0.31816	-0.12745	-0.0974095	-0.140307	-0.00408417	0.474078	0.134648	0.150261	-0.935698	-0.752903	-0.920537	-0.440591	-0.429835	-0.420084	-0.401983	-0.397695	1.73101	1.87749	1.54853	2.04694	1.90524	2.44804	2.45745	2.41662
ATP10A	-1.05398	-0.790891	-0.730319	-0.365508	0.805445	0.663977	1.64583	0.617218	-1.32552	1.18332	-1.60534	-1.44282	0.679994	0.349812	0.690095	0.849044	-1.52677	0.440678	0.150747	-2.21183	-0.378697	-0.262849	0.637007	-0.095919
ATP10B	0.377357	-0.221737	-0.0411774	-0.192229	0.818325	-0.0731571	0.175793	-0.27493	0.366594	-0.18467	-0.0919245	-0.253851	0.855141	0.0218156	0.221556	-0.139815	0.0100344	-0.0909361	-0.0801291	-0.0379497	0.750794	0.0346353	0.0542242	-0.141041
ATP10D	-0.146933	-0.59543	-0.611471	0.349316	-0.574034	0.472524	-1.54937	-0.545645	1.52409	1.2603	1.15602	1.70065	0.878349	0.596384	0.0681831	0.859927	-0.431697	-1.63466	-0.517536	0.233671	-1.4599	-0.0614126	-1.40642	-0.236544
ATP11A	0.806984	-0.137097	-0.0412713	-0.150403	-0.760618	-0.52358	-0.0758538	-0.617519	1.42495	0.959746	1.10993	1.0226	0.197161	0.406518	-0.0711485	-0.248484	0.788736	0.214295	0.741906	0.311511	-0.601253	-0.413113	-0.444868	-0.436125
ATP11AUN	-0.312038	-0.282442	-0.227553	-0.36914	0.28333	0.241154	0.355809	0.418621	-0.184456	-0.1093	0.012319	-0.309245	0.420829	0.107917	0.494396	0.244118	-0.0131039	-0.144994	-0.0057588	-0.245761	0.418974	0.0351138	0.352765	0.2254
ATP11B	0.038094	0.260458	0.111371	0.0809295	0.120813	-0.807722	-0.850252	-0.266358	0.22593	0.634794	0.300022	0.190393	0.177022	0.211747	-0.0237471	0.477512	-0.109738	0.263749	0.131236	0.445448	0.335161	-0.845695	-0.752123	-0.362826
ATP11C	0.124155	0.194665	0.12484	0.147996	0.213681	-0.0727202	0.939345	0.550502	0.147602	0.134319	-0.139539	0.195812	-0.289447	-0.384667	-0.00618513	-0.354704	0.591817	0.295492	0.350539	0.428228	-0.27261	-0.64567	-0.371906	-0.500627
ATP12A	-0.466103	-0.47809	-0.461899	-0.488333	0.297616	0.103687	0.227205	0.0587434	-0.350959	-0.134183	-0.324209	-0.417636	0.328572	-0.152772	0.235213	0.103677	0.320416	-0.408963	-0.297216	-0.349769	0.300794	1.04852	0.115744	0.0539474
ATP13A1	-0.0268269	0.00695841	-0.0382989	0.292581	-0.311287	0.175948	-0.404976	0.47759	-0.31498	-0.455657	-0.637032	-0.0556349	-0.540531	-0.211234	-0.592073	-0.128633	1.21218	1.22059	0.962763	1.45485	1.35328	1.40438	1.56174	1.43575
ATP13A2	0.56816	0.461951	0.359825	0.680388	-0.412471	-0.338067	-0.49677	0.115083	0.51206	0.485932	0.54176	0.663343	-0.50589	0.07306	-0.55567	0.334276	-0.102138	-0.124475	-0.65738	0.190403	-0.452351	-0.463513	-0.453891	-0.647932
ATP13A3	0.361025	0.328467	0.367389	0.320903	-0.461957	-0.135441	0.390722	-0.717894	0.0631856	0.0883165	-0.217007	0.157712	-0.648109	-0.320383	0.210205	-0.698409	0.361654	0.276288	0.144877	0.57491	-0.124265	-0.409384	0.601232	-0.327109
ATP13A4	0.055094	0.0222576	0.263792	-0.120247	-0.754404	-0.879405	-0.0641797	-0.441315	0.472867	1.0119	-0.118089	0.441803	-0.536479	-0.940568	-0.0604857	1.17593	-0.0967646	-0.788606	0.459157	0.67334	-0.174446	-0.858643	-0.491394	-0.698847
ATP13A5	-0.670455	-0.686909	-0.642762	-0.510062	0.72067	0.0927076	0.19171	0.0629067	-0.585528	-0.576259	-0.446239	-0.482122	0.196539	-0.208618	0.195756	0.0460846	-0.49617	-0.68766	-0.707816	0.382062	0.190355	-0.109254	0.059556	0.128725
ATP1A1	0.879928	0.721362	1.07551	0.465334	-0.765621	-0.582068	0.357979	0.194893	-0.0990094	-0.324678	-0.597306	-0.683192	-1.2941	-0.712681	-0.17732	-0.280092	0.346401	-0.390774	-0.323225	-0.992924	-0.596933	-0.963829	0.399584	-0.671673
ATP1A1-AS1	0.376073	-0.344795	0.0252366	0.235168	-0.420809	-0.0454829	-0.98623	-0.587245	0.574719	-0.264068	0.266541	0.756299	0.123294	0.433852	-1.14965	0.456747	0.171409	0.125386	-0.274858	0.386957	-0.536943	-0.0322761	-0.623818	-0.326803
ATP1A2	-0.240353	-0.499597	-0.369919	-0.425765	0.19977	0.192256	0.830856	0.360705	-0.384825	-0.383071	-0.311366	-0.380051	1.07549	-0.0243235	0.775719	0.155938	-0.255379	-0.439898	-0.24359	0.0628549	0.36876	-0.0155279	0.446925	0.14181
ATP1A3	-0.115737	0.129813	0.0142779	-0.0684404	0.358626	0.568517	0.16644	-0.0641424	-0.545977	-0.521115	-0.71224	-0.272078	0.0176309	0.44701	-0.00769194	-0.746614	0.392648	0.42653	0.103974	0.144877	0.756308	0.731666	0.642175	-0.431105
ATP1A4	0.143715	0.254949	-0.0388527	0.239128	0.721802	-0.897935	-0.126892	0.0154816	-0.867846	-1.106	-0.824784	-0.687675	0.368638	-1.44681	-0.667813	-1.0518	0.613313	0.416588	-0.342758	0.776968	1.84813	0.43581	0.588297	0.513154
ATP1B1	0.99377	0.247989	0.863493	1.32522	1.78613	0.807573	-0.953478	-0.315692	-1.32454	-0.333859	-1.06136	-1.27994	-0.921627	-1.52484	-1.00255	-2.15731	1.62412	1.1057	1.11846	1.48258	0.562451	0.5904	-0.383925	-0.384059
ATP1B2	-0.153116	0.0867839	-1.4067	-1.69112	-0.534479	-1.02375	-0.601422	-1.01983	0.928808	0.678193	1.58658	0.482751	-0.651414	1.36385	1.57594	0.298224	0.30622	-0.000586417	0.835622	0.143134	-0.280427	1.13851	1.9922	1.70217
ATP1B3	-0.126817	0.12259	-0.0826838	0.0805875	-0.066617	-0.866087	-0.0642381	0.0433799	-0.692008	-0.371444	-0.912644	-0.169947	-0.796485	-1.86231	-0.11005	-0.939973	1.62352	1.4663	1.19723	1.68863	1.73831	1.31752	1.69787	1.92847
ATP1B4	-0.273902	-0.270321	-0.213562	-0.28757	1.22355	0.332344	0.418621	0.289322	-0.156723	-0.123995	-0.0102831	0.069218	0.53957	0.127107	0.463901	0.373229	0.0508187	-0.118089	0.0139629	-0.130699	0.527726	0.155553	0.361046	0.271396
ATP23	-0.306547	-0.449734	0.0439009	-0.149821	-0.649586	-0.961932	-1.35819	-0.0408107	-0.0668631	-0.288547	0.374988	0.358717	-0.77454	-1.10129	-2.02451	0.0706782	1.40257	1.15432	1.34194	1.49053	1.06153	0.944086	0.76989	1.40696
ATP2A1	0.0658362	0.390363	-0.443831	-0.141385	-0.733701	0.309051	-0.298933	-0.287748	-0.467029	-0.46964	-0.526029	0.300418	-0.5395	0.187019	-0.111097	-0.0381405	0.429144	0.399584	-0.645805	0.341141	-0.23844	0.869734	0.182112	-0.423323
ATP2A2	0.0390489	0.00952718	-0.0677332	0.108895	-0.427578	-0.938853	-0.488723	-0.356625	-0.167879	0.230098	0.15572	0.157423	-0.813544	-0.523559	-0.362044	-0.1445	1.73437	1.29455	1.28479	1.6591	1.43853	0.665273	0.824037	1.39279
ATP2A3	0.276475	0.214934	0.102287	0.263718	-0.658342	-1.0983	-0.527907	-0.012094	0.25551	0.391628	0.278315	0.276465	-0.159563	-0.922333	-0.245564	0.493905	0.40462	0.366966	0.529911	0.256167	-0.289394	-0.594455	-0.563522	-0.340966
ATP2B1	0.585119	1.35836	0.470325	0.693724	0.720829	-0.309943	0.274	0.116499	0.412557	0.819405	0.0731673	0.152866	-0.576598	0.0330053	0.848162	-0.359534	-0.731464	-0.00705294	-0.653928	-1.15278	-1.29636	-1.45935	-1.21754	-1.30382
ATP2B1-AS1	-0.0653777	1.08841	0.0143181	0.194993	0.886086	-0.307534	0.275709	0.652296	0.265876	1.48241	0.804454	0.526255	0.201416	-0.272757	-0.13553	0.560808	-1.65129	-0.42187	-1.05059	-2.36713	-0.786395	-0.828709	-1.55181	-0.908575
ATP2B2	-0.881586	0.181114	0.131038	-0.343821	0.399453	1.04408	0.216904	0.169323	-0.505828	-0.490547	0.427277	-0.578473	-0.0455748	0.295171	-0.0591911	-0.0768194	-0.745422	-1.02269	-0.998509	0.086519	-0.0958176	1.11368	0.577921	0.625186
ATP2B3	-0.243103	-0.567812	-0.222214	-0.0639819	-0.423158	0.0440296	-0.178774	0.535558	-0.156201	-0.235732	0.261674	-0.140807	0.386618	0.329458	0.377039	0.718829	-0.326478	0.134016	0.238415	-0.295382	-0.533836	0.511158	2.04466	0.49129
ATP2B4	0.589029	1.05137	0.301387	0.486866	1.37508	-0.24517	-0.210765	0.457986	-1.71736	-2.11387	-1.84929	-2.40046	-0.982438	-2.262	-1.54704	-2.4853	0.579411	1.0665	0.259691	0.519203	0.458457	-0.455639	-0.39687	-0.436552
ATP2C1	-0.142703	-0.179909	-0.0517617	-0.0587415	0.668157	-0.171879	0.0935058	0.896038	-0.0677583	-0.0196152	-0.19072	-0.0262006	0.326396	-0.0418706	-0.135742	0.0117563	0.461488	0.29182	0.561944	0.47254	0.748711	0.672929	1.10842	1.06617
ATP2C2	-0.116645	-0.591487	-0.565167	-0.622519	0.155496	-0.0143641	0.108271	-0.0819934	-0.461655	-0.462438	-0.429022	-0.535736	0.203673	-0.252421	0.115756	-0.0714878	-0.101055	0.148174	-0.493122	0.382239	0.141187	0.673505	0.165702	1.288
ATP4A	-0.434489	0.143302	-0.423011	-0.412205	0.290021	1.74274	0.277192	0.16466	-0.331858	-0.329664	-0.286634	-0.34902	0.442391	0.00808401	0.321608	0.645676	-0.188148	-0.368817	-0.326244	-0.260091	0.363589	0.0343464	0.209922	0.15525
ATP4B	-0.286848	-0.283342	-0.232816	-0.308288	0.38467	0.301742	0.42689	0.315573	-0.148847	-0.154882	-0.0380292	-0.251561	0.561876	0.150066	0.607262	0.31719	0.0172982	-0.140222	0.0621256	-0.156844	0.52522	0.104394	0.448368	0.301086
ATP5F1A	-0.0542405	-0.0177165	-0.11797	0.191924	0.241773	-0.665545	-0.201729	-0.232172	-0.504073	-0.574929	-0.726844	-0.0153761	-0.186454	-1.28667	-0.737639	-0.882537	1.58929	1.56395	1.39729	1.85072	1.93943	1.33679	1.84297	1.51148
ATP5F1B	0.044732	0.200988	0.171301	0.245785	-0.0308456	-0.777838	-0.38822	0.175407	-0.299946	-0.145759	-0.380577	-0.0296205	-0.234889	-1.55154	-0.841125	-0.393279	1.72708	1.36611	1.20558	1.64825	1.56967	0.899959	1.32595	1.3818
ATP5F1C	-0.0227976	-0.110416	-0.00408417	0.0875327	0.348567	-1.02862	-0.409156	0.314286	0.00711265	-0.0774225	0.0341174	0.0442215	-0.0100345	-1.64346	-0.803084	-0.0894078	1.75936	1.48946	1.4219	1.81751	1.87633	1.02309	1.21147	1.57127
ATP5F1D	0.199043	0.350811	0.0932513	0.249868	-0.326673	-0.21871	0.158726	-0.612147	0.0587004	0.202096	-0.0831666	0.153679	-0.40259	-0.490547	-0.342496	-0.830108	1.2869	1.26731	0.900542	1.24492	0.826592	0.989408	1.08236	0.703496
ATP5F1E	0.015116	0.0648497	0.329426	0.134921	0.0626186	-0.394049	0.0481586	-0.574256	0.165291	0.339222	0.470353	0.440653	-0.325153	-0.818965	-0.244839	-0.56817	0.41667	0.167032	0.345181	0.382984	-0.0658826	-0.0607711	0.411107	0.242605
ATP5IF1	0.0890795	0.00318545	0.128861	0.0200834	0.198747	0.226087	0.137316	-0.213849	0.0106708	-0.126326	-0.244487	0.0901708	-0.382516	-0.474304	-0.165119	-0.510953	0.690257	0.577441	0.55756	0.416767	0.353781	0.673843	0.979614	0.120344
ATP5MC1	0.127422	0.144324	0.246685	0.0829951	-0.183602	0.166671	-0.161791	-0.561576	0.0386631	0.0139465	0.141511	0.121093	-0.431701	-0.325153	-0.476419	-0.456982	1.73042	1.17195	1.02428	1.80192	1.82363	2.24149	2.68113	2.00632
ATP5MC2	0.0968035	0.197401	0.176299	0.106477	-0.234736	0.38872	0.499536	-0.424857	0.0995738	-0.0659499	-0.00392515	0.074487	-0.386954	0.219084	-0.180967	-0.597012	0.482643	0.511682	0.25916	0.501908	-0.0924971	0.48405	0.755373	0.254101
ATP5MC3	0.211054	0.103324	0.208078	0.126141	0.0403166	-0.160372	-0.0715408	-0.424772	-0.0935468	-0.436337	-0.396199	0.0145268	-0.42685	-0.674217	-0.681339	-0.818836	2.08288	1.54973	1.54694	1.95785	1.86236	1.74596	2.07775	1.84402
ATP5MD	-0.075594	0.124096	0.183274	0.0527316	-0.243424	0.474257	0.226466	-0.269712	-0.389848	-0.481031	-0.513344	-0.0482172	-0.934632	-0.840441	-0.433015	-0.681093	1.0086	1.00947	0.746716	1.12803	0.551089	1.07469	1.40608	1.01307
ATP5ME	0.108816	0.192256	0.208038	0.0571979	-0.325554	0.264332	0.462302	-0.595986	-0.0391252	-0.0337625	-0.187314	-0.00415076	-0.84773	-0.53759	-0.232503	-0.857658	1.39359	1.19292	0.912871	1.17921	0.756928	1.36708	1.6895	1.02641
ATP5MF	-0.277918	-0.231738	-0.361283	-0.195861	0.236154	0.196974	0.259477	-0.302757	-0.610976	-0.582641	-0.660324	-0.273488	-0.357548	-0.687824	-0.342918	-0.480724	1.49345	1.16183	0.849031	1.32832	1.3301	1.65005	1.9512	1.47768
ATP5MG	0.0499978	0.0945868	0.16194	0.0225503	-0.214698	0.106537	0.357378	-0.540727	-0.072754	-0.0761699	-0.190962	-0.0771248	-0.472046	-0.519235	-0.178962	-0.69498	1.31543	1.26427	1.09268	1.21367	0.72685	0.999428	1.37847	0.750259
ATP5MGL	-0.2841	-0.232263	-0.122331	-0.187689	0.669197	-0.520765	-0.0559504	-0.3564	0.488014	-0.224168	-0.129314	-0.127137	0.369492	-0.616442	0.318723	0.450383	-0.151432	0.186594	-0.346514	-0.0395291	1.55115	0.315976	-0.176977	-0.327691
ATP5MPL	0.0870117	-0.0495748	0.162047	0.129463	-0.214744	0.477767	0.481502	-0.0835229	-0.345592	-0.646359	-0.664197	-0.0813214	-0.512992	-0.0157872	-0.354704	-0.491634	0.625624	0.54806	0.21437	0.533417	-0.257863	0.354095	0.804753	0.244772
ATP5PB	-0.0441703	-0.00582723	-0.114865	0.179276	0.292889	-0.280584	-0.264119	-0.447439	-0.230266	-0.37352	-0.49061	0.0852647	-0.237935	-0.712106	-0.665182	-0.832117	0.964663	0.895161	0.579358	1.03063	0.854738	0.656705	0.900094	0.704549
ATP5PD	-0.00386695	-0.0513979	0.0980713	0.037601	-0.101332	0.490687	0.255995	-0.11478	-0.107379	-0.515251	-0.351194	0.00155574	-0.640616	-0.488149	-0.441688	-0.472261	0.867185	0.693071	0.613668	0.873257	0.184035	1.04368	1.19329	0.84161
ATP5PF	-0.0111331	0.0208484	0.125385	0.0719311	0.297766	0.455486	0.0571656	-0.283025	0.0149086	-0.185036	0.0364641	0.152159	-0.455943	-0.126302	-0.4918	-0.389332	1.83454	1.50217	1.21825	1.82193	1.64781	1.98162	2.39198	1.96705
ATP5PO	0.198638	0.281573	0.370277	0.171212	-0.39457	0.118066	0.0375498	-0.554383	0.0948278	0.0983525	0.131352	0.20356	-0.53118	-0.603779	-0.463046	-0.826444	1.05131	0.686024	0.319442	0.77107	0.0607726	0.74002	1.09076	0.648501
ATP6AP1	-0.223916	-0.362671	-0.434187	-0.103383	-0.36749	-0.279379	-0.127402	-0.365163	-0.362406	-0.45009	-0.623642	-0.128278	-0.308288	0.0647599	-0.276846	-0.301033	0.610044	0.764178	0.336322	0.838255	0.38111	0.487056	0.621217	0.630753
ATP6AP1L	0.0307462	-0.266764	-0.613867	-0.717349	0.0818153	-0.411571	-0.678357	-0.383656	0.929867	-0.0193965	-1.19088	-0.00377241	-0.502867	-0.366192	-0.483535	0.128043	1.65409	0.706432	0.760264	0.725438	0.363074	0.236773	-0.648823	0.737146
ATP6AP2	-0.207246	-0.22332	-0.277189	-0.163615	0.0990019	-0.503234	-0.397715	-0.559438	0.120848	0.202144	-0.0455162	0.155938	0.0449733	0.258977	-0.359005	-0.184297	1.63414	1.52743	1.3994	1.86701	1.56395	1.10505	1.41968	1.38063
ATP6V0A1	-0.0330824	-0.181837	-0.490068	-0.198563	-1.47113	-1.23146	-0.927602	-1.57551	1.12954	1.16907	0.785345	1.32391	-0.819612	0.154839	-0.1052	-0.441451	0.231882	0.366616	0.245157	0.641394	-0.0985096	0.133552	-0.109399	-0.260959
ATP6V0A4	-0.627387	-0.219842	-0.000509247	0.227517	-0.58082	-0.581497	-0.280209	-0.598577	-0.081622	0.984574	0.781597	0.291691	-0.281801	0.093287	-0.2348	-0.70075	0.701588	-0.786156	0.381258	0.404216	-0.253434	-0.208182	-0.0575924	-0.481238
ATP6V0B	-0.0337917	-0.0835229	0.0268312	-0.00859872	-0.370222	-0.173368	0.552871	-0.0708268	-0.473203	-0.629817	-0.620622	-0.166958	-0.58123	-0.555103	-0.193872	-0.512829	1.02385	0.813849	0.81106	0.937517	0.867434	0.940629	1.47981	1.088
ATP6V0C	0.0987109	0.138077	0.350022	-0.138585	-0.396712	0.214438	0.457446	-0.278037	0.203673	0.0639685	0.21126	-0.0281572	-0.431379	-0.258572	0.264156	-0.291757	0.371942	0.407663	0.288748	0.252657	-0.0502614	0.450635	0.859494	0.266719
ATP6V0D1	0.691494	0.651464	0.619557	0.599551	-1.15418	-0.78721	-0.150736	0.0961097	0.288494	0.365279	0.338777	0.291071	-1.29116	-0.619385	-0.143914	-0.440398	0.294177	0.241146	0.287764	0.110293	-1.74748	-0.641232	-0.514685	-0.442026
ATP6V0D2	-0.918176	0.790954	0.010957	-0.708289	-0.148535	-0.0759498	0.081074	-0.130604	-0.791394	-0.76325	-0.603164	-0.669952	0.071912	-0.231703	3.75187	2.31543	-0.753524	-1.03988	-1.09991	-0.808087	0.055981	0.830372	0.16218	-0.124748
ATP6V0E1	0.178257	0.142112	0.286818	0.410462	0.526101	-0.0701717	-0.221037	0.495139	-0.0170399	-0.399848	-0.378795	0.236215	0.148921	-0.62536	-0.551799	0.43701	0.196242	0.343126	0.208865	0.617741	-0.223393	-0.356801	-0.461538	-0.33105
ATP6V0E2	0.494684	0.609473	0.320804	1.11973	0.617962	-0.67496	-0.285804	-0.462313	0.647494	0.196963	0.258035	0.883291	0.816863	-0.58776	-1.07465	-0.186289	0.284415	0.224112	-0.147133	0.899268	-0.350615	-0.543938	-0.42405	-0.516949
ATP6V0E2-AS1	-0.0165782	0.2521	0.397579	0.30294	-0.485069	-0.354831	-1.35965	-0.610788	0.644299	0.477827	0.796073	1.82051	0.0490467	0.350263	-1.80649	0.686942	-1.78109	-0.856244	-2.63414	0.635082	-0.770863	-0.967794	-2.38291	-0.299076
ATP6V1A	-0.232884	-0.122998	-0.481985	0.401385	0.336195	-0.368353	0.505231	0.30549	-0.44211	-0.183733	-0.622489	0.225516	-0.692323	-1.02518	-0.47923	-0.54646	0.419264	0.446925	0.235509	0.997017	0.201215	0.368133	0.846968	0.687479
ATP6V1B1	0.108606	-0.310714	-0.293558	-0.353097	0.437195	0.241731	0.36441	0.22681	-0.19234	-0.190108	-0.144475	-0.283917	0.550976	0.0494631	0.445125	0.27872	-0.038881	-0.188879	-0.0445856	-0.174687	0.519498	0.0912907	0.31838	0.235122
ATP6V1B2	0.0961829	0.123469	0.0882473	0.520056	-0.900229	-1.27782	-0.70508	0.204854	0.178857	0.347386	0.142021	0.568833	-0.292285	-1.05552	-0.418015	0.156263	0.680007	0.62914	0.853022	0.948219	-0.270075	-0.705426	-0.333149	0.116921
ATP6V1C1	0.168356	-0.0102432	0.0746188	0.39241	-0.367786	-0.105023	-0.584049	-0.273937	0.304138	0.225516	0.233856	0.577106	-0.12905	0.0227391	-0.408639	0.0189591	0.58603	0.397571	0.336696	0.790635	-0.164631	-0.0372177	-0.0633993	0.0364308
ATP6V1C2	-0.164418	-0.923204	-0.172396	-0.0786697	-0.690456	0.0896915	0.233233	0.0864049	-1.25476	-0.923011	-0.699756	-0.561661	-0.771931	-0.762336	-0.280798	-0.245634	1.35306	1.25092	1.2597	1.24053	2.119	1.75168	1.83693	2.05174
ATP6V1D	-0.356043	-0.397833	-0.718167	-0.0711858	0.148553	-0.303757	-0.292621	-0.138713	-0.371767	-1.0142	-0.939973	-0.0544685	-0.252996	-0.546808	-0.759407	-0.688195	0.575596	0.597015	0.256659	0.648642	-0.152428	-0.0399357	-0.162918	-0.0928588
ATP6V1E1	-0.0610934	-0.111582	-0.0583699	0.0724959	-0.129991	-0.18844	-0.411811	0.325568	-0.0968516	-0.259361	-0.420726	0.0553954	-0.188383	-0.67311	-0.400474	0.0242173	0.514907	0.488385	0.0823998	0.649568	0.329074	0.44483	0.589566	0.272169
ATP6V1E2	0.0770031	0.45934	0.624074	0.319393	-0.934053	0.045508	-0.311457	0.0405905	0.167047	0.422737	0.741858	0.282674	-0.576495	-0.216127	-0.54132	-0.49033	-0.0181582	0.0994629	0.547574	-0.00382139	-1.04177	-0.361207	-0.555628	-0.827769
ATP6V1F	0.208525	0.179359	0.191463	-0.0588495	-0.416436	0.176999	0.603012	-0.292621	0.140939	0.0791717	-0.0967595	-0.0877814	-0.489523	0.0471273	0.163154	-0.485651	0.457028	0.39735	0.0943527	0.409794	-0.172891	0.589951	0.733864	0.419264
ATP6V1FNB	-0.296804	-0.0153067	-1.25399	-0.120364	-0.598745	0.851992	2.2233	1.28945	0.939785	-1.1445	-0.973298	-1.16867	-0.346447	0.860136	-0.226931	0.6903	-1.2363	0.168846	1.47605	-1.24454	-0.236013	0.660262	2.55012	0.983247
ATP6V1G1	0.168737	0.307584	0.42774	0.164448	0.0262022	-0.236983	-0.345534	0.177589	0.46294	0.522845	0.666291	0.637177	0.13328	-0.130551	-0.36724	0.586081	-0.0127717	0.133068	-0.0992522	0.0712369	-0.528269	-0.538859	-0.504582	-0.417892
ATP6V1G2	0.758929	1.05243	0.421708	1.39004	0.408964	-0.174154	-0.302861	1.10276	0.439658	0.16509	0.0934013	0.709548	-0.0472939	-0.528423	-0.952995	0.581676	-1.38185	-0.652735	-1.03257	-1.34566	-2.22861	-1.71295	-1.97224	-1.13588
ATP6V1G3	0.214175	0.203017	-0.676187	-1.38934	0.20137	-0.700632	0.0613985	0.671242	1.14181	1.10143	1.62236	0.826098	-0.377227	-0.842076	-0.292245	1.54596	-1.11779	-1.52389	1.46157	-1.3986	-0.0756357	-0.705669	-0.389938	-0.111503
ATP6V1H	0.0807439	-0.0853962	-0.150921	0.324642	0.0624985	-1.20916	-1.33708	0.0502249	-0.0271668	-0.00881462	0.188431	0.353942	0.370417	-1.16777	-0.993652	0.199879	0.438495	0.266919	0.706232	0.424119	0.105837	-0.833265	-0.469223	-0.281996
ATP7A	0.0950323	0.0765195	0.108721	0.132556	-0.386113	-0.201556	-0.483899	-0.850986	0.406935	0.628209	0.607813	0.521083	-0.230308	0.397138	-0.116196	-0.421909	-0.120438	0.0214337	0.10307	0.171656	-0.330587	-0.135298	-0.506629	-0.6308
ATP7B	0.00441852	-1.16607	-1.77641	-0.0553335	0.785098	-0.4082	-0.793782	0.214438	0.265552	-0.929546	-0.841125	-0.318679	-0.1136	-1.42161	-0.750736	-0.563548	5.21346	5.34303	4.75485	5.47206	3.63374	3.074	2.82636	3.64923
ATP8A1	-0.083962	-0.00814514	0.058299	0.329703	-0.343316	-0.686319	0.304192	0.338718	0.487386	0.823624	0.70508	0.937547	0.631684	0.480717	0.784436	0.836292	-0.346415	-0.0666264	0.233894	0.131258	-1.17096	-1.24354	-0.323225	-0.832103
ATP8A2	-0.656997	-0.505077	-0.233564	-0.685789	0.119238	-0.0534127	2.14158	-0.122331	-0.347443	-0.545108	-0.477896	-0.614971	0.105924	-0.29113	1.39483	0.352323	0.0987253	0.0438948	-0.18168	-0.101395	0.752727	1.24957	2.33433	1.06028
ATP8B1	0.800781	0.704795	0.389273	0.807278	-0.545959	-0.59543	-0.605714	0.364223	1.34785	0.56058	0.474428	1.29582	-0.0707964	0.34047	-0.67137	0.602542	-2.31041	-0.581302	-1.4034	-1.10282	-0.422511	-1.6776	-1.20758	-1.34056
ATP8B2	0.662583	0.501609	-0.319912	0.0841068	0.150089	-0.588887	-0.717349	-0.000733182	0.0569097	-0.514087	-0.872739	-0.664572	-1.59429	-1.29315	-1.93203	-1.1445	2.84915	1.89133	1.524	2.0765	1.78635	1.30548	1.2269	1.66045
ATP8B3	-0.447387	-0.472988	-0.0346022	-0.458724	0.208647	0.164398	0.243112	0.127919	-0.339591	-0.332983	-0.288329	-0.409443	0.307111	0.209147	0.264541	0.602719	-0.195665	-0.389213	-0.126596	-0.361314	0.293948	-0.037173	0.159611	0.63288
ATP8B4	-0.660348	-0.659676	-0.614072	-0.521448	0.0932169	0.0767101	0.212048	0.0788476	-0.574222	-0.537042	-0.42967	-0.453199	0.199879	-0.20796	0.270374	0.0572409	-0.454406	1.30255	-0.610869	-0.47162	0.193372	-0.109828	0.143641	0.0184971
ATP8B5P	-0.0590449	-0.0453529	-0.267276	0.0467283	1.04331	-0.423403	0.013385	0.156537	-0.316071	-0.342839	-0.446753	-0.138949	0.815687	-0.869615	-0.636348	-0.62536	0.400451	0.248375	0.00418791	0.310344	1.22567	0.151609	-0.493029	0.0462225
ATP9A	0.0756616	0.413455	-1.75412	-1.89859	-0.368398	-1.21458	-0.142806	-1.19786	-0.640008	-0.0279574	-1.30834	-1.6456	0.207349	-1.39565	-0.647419	-1.46659	0.641195	1.63652	1.05131	2.91874	2.9996	2.40259	3.96314	3.56571
ATP9B	0.309202	0.134546	0.194993	0.274079	-0.549738	-0.655943	-0.804139	-0.195297	0.294219	0.0979821	0.27872	0.415711	-0.632604	-0.651672	-0.648209	-0.0349357	0.48178	0.327889	0.344875	0.75959	-0.117844	-0.381721	-0.572282	-0.401597
ATPAF1	0.0966519	0.0951391	0.376785	0.40676	-0.732464	-1.05328	-1.33865	-0.238368	-0.440826	0.296559	-1.07465	0.147707	-0.102001	-0.676244	-1.4722	0.678495	0.700616	0.236702	0.392453	0.645957	0.537582	0.25417	-0.112843	-0.555805
ATPAF2	0.232652	0.290809	0.288343	0.196272	-0.330991	-0.353762	-0.269712	-0.324277	0.058004	0.125806	-0.217471	0.139765	-0.23607	-0.264289	-0.394685	-0.396146	0.453515	0.391615	0.383421	0.380769	-0.356523	0.245053	0.220704	-0.209581
ATPSCKMT	0.220897	0.222754	0.16644	0.358955	0.0609858	0.304641	-0.526103	-0.287366	-0.368132	-0.248836	-0.781537	0.283158	-0.398091	-0.0950471	-0.620877	-0.244407	0.459762	0.20678	-0.0288633	0.778031	0.903659	0.389631	0.0867522	0.398205
ATR	0.100985	0.255675	0.11164	0.285263	-0.245528	-0.546077	-0.670133	0.0765195	0.217474	0.531628	0.285208	0.37186	-0.123393	0.118378	-0.219149	0.369055	0.120171	0.0200791	0.0111299	0.14948	-0.202827	-0.673506	-0.510984	-0.295024
ATRAID	0.171345	0.0762188	0.267063	0.220403	-0.445578	-0.377959	-0.54264	-0.458394	0.125473	0.229618	0.336357	0.396197	-0.60454	-0.796193	-0.864497	-0.472196	1.09128	0.993543	0.935683	1.48889	0.377894	0.714617	0.665869	0.558909
ATRIP	0.168899	-0.227834	0.105175	0.087046	-0.220108	-0.250572	-0.542114	0.127313	0.50825	-0.0613552	0.245481	0.223263	-0.394745	0.00801493	-0.614668	-0.162911	0.376014	-0.079124	-0.330734	0.241823	0.0101623	0.628533	0.65175	0.560522
ATRN	0.0337505	0.215421	0.230075	-0.05788	-0.910269	-1.31646	-0.355056	-1.49126	0.143364	0.46746	0.657753	0.238465	-0.798493	-0.861487	-0.142382	-0.817558	0.585456	0.503255	0.443295	0.747694	0.167101	-0.387668	0.412031	-0.301067
ATRNL1	0.635216	0.384458	0.56499	1.26174	0.66582	0.634491	0.100589	-0.379779	-0.105118	0.178388	-0.169153	-1.24702	-0.101602	1.08005	0.0500723	0.316456	-0.398207	-0.497317	-1.70251	-1.08608	-0.359935	-0.0096118	-0.413113	-0.601563
ATRX	0.436997	0.391302	0.0713207	0.287675	-0.0535779	-0.519775	-0.756073	-0.396867	0.2195	0.367264	0.121093	0.353145	-0.194829	0.436297	-0.0740851	0.0605585	-0.0456083	0.478905	0.105749	0.312303	-0.180563	-0.100375	-0.736949	-0.767642
ATXN1	0.0767101	-0.00212141	0.444344	0.981227	-0.698386	-0.11629	-0.355246	0.82086	-1.63023	-2.69071	-3.02963	-2.75104	-0.909244	-1.3342	-1.83031	-1.01457	1.52743	2.00632	1.69235	2.40081	1.58426	1.65409	0.279851	1.93593
ATXN10	0.149973	0.0466838	-0.0157696	0.220335	-0.295314	-0.301085	-0.516137	-0.29489	0.385454	0.372655	0.295999	0.418889	-0.205288	-0.103463	-0.376795	0.07736	0.273009	0.142099	0.284611	0.286973	-0.434599	-0.456679	-0.313683	-0.383357
ATXN1L	-0.203908	0.221494	-0.169222	-0.0269754	-0.484566	-0.576796	-0.326906	-0.108977	-0.115748	-0.0256472	0.515826	-0.967513	-0.69828	-0.892185	-0.50789	-0.859443	0.689258	0.929309	0.352353	1.02165	-0.326577	-0.525187	0.62047	0.410055
ATXN2	0.764568	0.603786	0.426471	1.05051	-0.696645	0.110535	-0.775925	0.51427	0.593497	0.515442	0.556813	0.855499	-0.67974	0.256167	-0.710201	0.676025	-0.0663582	-0.842359	-0.124977	0.148	-1.13854	-0.472331	-1.83749	-0.461734
ATXN2L	0.31565	0.386644	0.266051	0.186964	-0.69008	-0.30804	-0.488241	-0.300111	0.223763	0.321684	0.213019	0.131673	-0.708912	-0.274786	-0.401001	-0.394455	0.594957	0.310002	0.406586	0.37056	-0.156927	0.255599	-0.120086	0.261651
ATXN3	0.401095	0.341872	0.274108	0.399758	0.444131	-0.264232	-0.380097	-0.817884	0.518346	0.405827	0.359136	0.386049	-0.102955	0.257952	-0.0295068	-0.555309	-0.747777	-0.412657	0.0531046	-0.289231	-0.989295	-1.751	-1.16184	-1.71575
ATXN3L	0.0127248	0.147822	0.473474	-0.930773	0.0107595	-0.0478485	0.148445	-0.336175	-0.728553	-0.00756431	-0.132527	0.0134297	0.101916	-0.505323	0.0400284	-0.0330848	-0.0902627	-0.743773	-0.838695	0.00678077	-0.0865401	-0.0510583	0.699913	0.771276
ATXN7	0.405087	0.891006	0.573648	1.13412	-0.706482	-1.18997	-0.551861	0.731996	0.408291	1.03943	0.442127	0.668404	-0.455693	-0.607292	0.233484	0.292115	-0.383848	0.0169862	0.542398	-0.106639	-1.13229	-1.30315	-1.13177	-0.889006
ATXN7L1	0.686497	0.372128	-0.00422647	-0.0620134	-0.344575	0.0268655	0.141249	0.136888	0.351023	-0.0405541	0.207658	-0.0390526	-0.484062	0.0357804	-0.326208	-0.272647	1.08133	1.26676	1.24979	0.757307	-0.396555	0.276231	-0.115481	-0.345946
ATXN7L2	0.451429	0.0298073	0.285148	-0.0168376	-0.763794	0.0882473	-0.110416	-0.293196	0.2532	0.19651	0.183093	0.0210206	-0.906863	0.295776	-0.0286107	-0.305089	0.501464	0.113831	-0.115525	0.151245	-0.564104	0.345804	0.119491	0.488279
ATXN7L3	0.255929	0.356627	0.36874	0.227261	0.0964391	-0.124291	0.229246	-0.0119416	0.296587	0.185031	0.288453	0.179557	-0.191569	-0.434186	-0.125402	-0.223966	0.0321901	-0.133038	-0.23422	0.082452	-0.418839	-0.182835	-0.473244	-0.468712
ATXN7L3B	0.546863	0.633056	0.632619	0.300604	-0.681011	-0.71931	-0.406037	-0.309422	0.890415	0.932739	1.03688	0.988455	-0.271165	0.0544803	-0.2107	0.840809	-0.495498	-0.0348811	0.225828	-0.0951841	-1.3788	-1.09654	-0.883576	-0.920872
ATXN8	0.0482827	-0.0206486	-0.367166	-0.409947	0.761685	-0.644765	-0.194973	-1.23418	-0.417483	0.919051	0.239004	0.23541	0.709773	0.948225	-0.201159	-1.71599	0.278752	-1.00243	0.607907	-1.40642	-0.146876	-0.1119	-0.105089	-1.21433
ATXN8OS	-0.394759	-0.404382	-0.352816	-0.421807	0.231084	0.203461	0.275917	0.167894	-0.294838	0.122326	-0.208022	-0.374496	0.336148	0.00606793	0.315934	0.170681	-0.134109	-0.300791	0.0272782	-0.315408	0.322888	-0.00052815	0.206394	0.128496
AUH	0.204914	0.161556	0.085303	0.361526	0.173053	-0.571073	-0.482651	0.262207	-0.082907	0.126107	-0.137917	0.0496761	-0.266595	-0.609541	-0.989165	-0.539761	1.12372	0.960829	0.955653	1.34582	0.83339	0.27135	-0.273792	0.547658
AUNIP	-1.53612	0.281973	-1.37417	-2.55417	-0.779753	-0.627515	1.54716	-0.357172	-2.33759	-0.935113	-1.26809	-2.204	-1.28253	-0.644901	0.132974	0.15395	3.32219	2.18264	2.19527	3.33621	3.97015	3.99029	4.39095	4.37426
AUP1	0.184816	0.421267	0.181931	0.237393	-0.718777	-0.715275	-0.457206	0.16194	0.0944328	0.27319	0.13442	0.170847	-0.616615	-1.07162	-0.741188	-0.256994	0.926098	0.972511	0.75959	0.89955	0.074578	0.406396	0.750259	0.578981
AURKA	-0.552611	-0.806545	-0.897695	-0.17422	0.146814	0.359065	-0.393528	-0.217727	-0.0491699	-0.890638	-0.955305	-0.643114	-0.654304	-1.13225	-1.18591	0.22051	4.48916	3.22856	3.03778	4.34253	5.1994	5.01896	4.27638	5.06634
AURKAIP1	-0.261737	-0.170482	-0.294124	-0.322356	0.126763	-0.265981	0.0408976	-0.278384	-0.28353	-0.563838	-0.618529	-0.311219	-0.295967	-0.629879	-0.684603	-0.883371	1.16204	1.19515	0.885807	1.21724	1.37952	1.64563	1.66877	1.37925
AURKB	0.240943	-0.536172	-0.721703	0.144813	-0.533299	-0.588033	0.837408	0.645564	0.202576	-1.0822	-0.840619	-1.45737	-0.801821	-2.11387	-1.20055	0.446345	5.38207	3.74306	3.23687	5.31881	4.4318	5.26868	5.2348	5.40813
AURKC	0.568927	-0.897206	0.162594	0.275229	-1.24786	-0.633802	-0.780013	1.00604	1.22801	-0.105474	0.0357804	0.111855	-1.76539	-1.9799	-0.283791	0.311143	0.752403	-0.135736	-2.07792	0.700337	-0.0270391	0.256854	-0.117511	0.704806
AUTS2	0.933434	0.73444	1.56463	0.668157	-2.69041	-1.03009	-2.43916	-1.94048	1.7797	1.83894	1.81041	1.56906	-0.362887	0.478667	1.10031	0.507175	-3.18779	-2.57563	0.409053	-3.18779	-3.11514	-2.80393	-3.11514	-3.36284
AVEN	-0.129116	0.181317	0.155535	0.136948	0.643524	-0.318334	0.2052	-0.50601	-0.234694	0.0757496	-0.0439706	0.0885192	-0.182037	-1.16694	-0.418156	-0.575665	2.58869	2.3378	2.35374	2.79238	2.84915	2.44378	2.77035	2.38417
AVIL	-0.141127	-0.0516742	-1.16658	0.707153	-0.345958	0.766458	-0.717818	0.484053	0.316603	-0.789893	-0.422742	0.38241	0.837304	0.801826	-1.66134	1.24819	-0.15166	0.155686	0.439625	0.865273	0.278884	1.2125	-1.34361	-0.924915
AVL9	-0.128202	0.0600153	-0.0300106	-0.199206	-0.193744	-0.913005	-0.282263	-0.743137	0.220288	0.402975	0.390318	0.0894146	-0.141652	-0.649354	0.00185016	-0.429183	0.335851	0.346907	0.120673	0.39221	-0.101055	-0.482325	-0.230377	0.0617798
AVP	0.151709	-0.46905	0.192557	-0.542196	1.92104	-1.23972	-0.354982	0.112124	0.637541	-1.6456	-0.134437	-0.137917	0.765742	1.09818	0.330095	0.61524	0.171205	-1.83662	-0.965714	-2.25888	2.13272	1.10274	1.02957	0.58866
AVPI1	0.152154	1.04198	1.19791	-0.423316	-0.864422	-0.402769	0.93367	-0.438011	-0.334953	0.274221	0.510051	-0.700569	-1.38728	-0.822776	0.895618	-1.27391	0.419116	0.638564	0.877958	0.181832	-0.48696	0.003563	0.127276	-0.302229
AVPR1A	-0.309144	-0.28566	-0.222601	-0.359852	0.271707	0.245939	0.359984	0.260458	-0.181819	-0.184826	0.0202619	-0.306392	0.422577	0.100186	0.510936	0.241828	-0.00820494	-0.148225	0.0114153	-0.24383	0.411265	0.0313833	0.3661	0.232359
AVPR1B	0.451285	-0.265827	-0.455347	-0.579533	0.137999	0.520323	1.76552	-0.0136103	-0.400527	-0.383844	-0.310486	-0.511992	0.173091	-0.141484	0.315662	-0.0426779	-0.25442	0.092614	-0.368017	-0.51609	0.0922565	-0.167057	0.00381887	-0.081883
AVPR2	-0.502174	-0.539244	-0.49086	-0.572944	0.133523	0.0499978	0.134099	-0.0226029	-0.405433	-0.399365	0.375835	-0.499615	0.207169	-0.170555	0.136625	-0.0234167	0.144278	-0.480236	-0.38704	-0.466433	0.142043	-0.142032	0.00718654	-0.0660569
AWAT1	-0.657758	-0.666652	-0.645518	-0.608162	0.0418286	0.0361658	0.113187	0.240362	-0.553343	0.265983	-0.499071	-0.524453	0.154453	-0.212468	0.151935	0.659119	-0.467745	-0.699158	-0.703919	-0.519641	0.118069	1.29455	0.0131059	-0.0456083
AWAT2	-0.278963	-0.2485	-0.22332	-0.301772	0.456286	0.32457	0.438083	0.297435	-0.139472	-0.133788	-0.0258278	-0.229683	0.621656	0.139718	0.534283	0.381082	0.0388184	-0.110738	-0.0296142	-0.123672	0.642175	0.164923	0.403464	0.324273
AXDND1	0.19744	-0.837431	0.220403	-0.878251	-0.152258	-0.292379	-0.0519514	-0.347194	-0.708178	-0.681584	-0.613835	-0.778079	-0.0189527	-0.464589	-0.0557714	-0.327951	-0.670288	0.788041	-0.806144	1.033	-0.0841146	3.75909	-0.161564	-0.269949
AXIN1	0.339202	0.35047	0.304192	0.22589	-0.260808	-0.804558	-0.0933058	0.11248	0.548283	0.625694	0.676325	0.571059	-0.109237	-0.998457	-0.297989	-0.223233	-0.501182	0.125761	0.334563	-0.026657	-1.0009	-1.11392	-0.920291	-1.17926
AXIN2	-1.0819	-0.242118	-0.164935	0.382092	-0.360048	-0.447439	0.609098	-0.454353	-0.259065	1.60082	0.264934	0.453748	0.379337	-0.454048	-0.0951453	-0.487067	0.771884	0.862086	0.289495	0.197316	-0.0694436	-0.48466	0.499568	0.313157
AXL	0.168824	-0.114719	0.119894	-0.0316425	0.57571	0.424702	0.791213	-0.511582	0.258898	0.184193	0.0596726	-0.0220114	0.0356552	0.564472	0.70863	0.170719	0.179357	0.118069	0.0337612	0.109605	0.60808	0.57639	1.00409	0.022787
AZGP1	1.13744	-0.0288994	0.352028	1.39753	-0.798999	0.958642	-1.04595	-0.833319	0.187431	0.241828	0.774703	0.279892	-0.129553	-0.161951	-1.07706	-0.0539295	-2.18646	0.460563	0.184499	-1.28851	-0.959134	0.62832	-0.735825	0.0842883
AZGP1P1	-0.940742	-0.121052	-0.0265701	-0.35242	0.916898	-0.0818894	0.212682	0.599241	-0.80357	-0.271077	-0.305415	-0.797226	-0.0474607	0.515114	0.465881	-0.290139	-0.788469	-0.127653	0.356165	-0.05285	0.184542	-0.394589	0.989752	0.0102422
AZI2	-0.59267	-0.418726	-0.809848	-0.277688	0.0684444	-0.452179	-0.61972	0.187794	-0.0324421	-0.217782	-0.540593	-0.00264141	-0.032249	-0.0446417	-0.336208	0.536461	0.621974	0.375605	0.456891	0.659235	0.590747	0.0745114	0.197011	0.619316
AZIN1	-0.0299364	0.100536	0.0408358	0.164897	0.226422	0.222845	-0.272144	-0.179162	-0.498439	-0.116196	-0.518214	-0.0117019	-0.452099	-0.643499	-0.494919	-0.645232	0.790635	0.90116	0.737903	0.919659	0.843603	0.55926	0.487641	0.506137
AZIN1-AS1	0.0080838	-0.11996	-0.313989	-0.056078	-0.522894	-0.533357	0.248367	-0.0118779	-0.00317129	0.295222	0.31747	0.143977	-0.818391	-0.555952	-0.220481	-0.949709	0.458581	0.666573	-0.245428	0.711407	0.082515	1.05121	0.746595	0.243178
AZIN2	0.442125	-0.0759498	0.703769	1.42504	0.463951	0.226172	-0.38044	-0.314718	-0.497493	-1.82881	-0.929257	-0.385883	-0.355209	-0.89389	-0.525813	-1.26682	-0.0846764	0.261651	1.47402	3.15649	0.632953	0.221461	-0.894246	-0.65371
AZU1	0.185781	1.21686	0.787099	-1.4454	-0.584214	-1.6344	0.144908	-1.6012	0.504993	2.15427	0.981002	0.185202	-0.259198	-0.830455	1.37084	0.0495747	0.160887	1.21486	1.34809	0.0774433	-0.732396	-1.39988	0.230895	-0.484981
B2M	-0.119273	-0.00631195	0.0163612	0.0415601	0.257774	-0.59272	-0.285738	0.145024	-0.532157	-0.457161	-0.69561	-0.195439	-0.164851	-1.08522	-0.436541	0.115756	0.351728	0.479093	0.233946	0.446205	0.518064	0.232041	0.280995	0.479694
B3GALNT1	0.189786	-0.0330824	-0.262214	-0.217302	0.414437	0.064193	-0.406095	-0.0996436	-0.62536	-0.690879	-1.04778	-0.373074	-0.730181	0.264505	-0.0685574	-0.928909	1.35055	0.362541	0.0321647	0.316091	1.27495	0.610897	1.03431	0.595692
B3GALNT1P1	-0.769024	-0.808741	-0.703888	0.109419	-0.339922	-0.282297	-0.0802153	-0.354168	-0.561825	1.09765	-0.529365	-0.835091	-0.103525	0.409898	-0.0822314	-0.39846	0.377599	1.14641	1.03135	0.142671	-0.129415	-0.436496	-0.176466	0.567702
B3GALNT2	0.557876	0.135621	0.083797	0.164398	-0.558913	-0.538161	-0.311211	-0.296751	0.12305	-0.0190356	-0.643327	-0.16673	-0.381861	0.265361	-0.310787	-0.316183	1.0091	0.61215	0.519711	0.663666	0.301086	0.262648	0.932877	0.620121
B3GALT1	-0.32893	-0.161213	-0.269501	-0.328012	0.366239	0.349173	0.36889	0.437195	-0.224317	-0.206955	-0.0168512	-0.260948	0.565354	0.132447	0.462309	0.26055	-0.0329229	-0.185325	-0.130404	-0.17928	0.452571	0.150535	0.353014	0.308189
B3GALT2	-0.689967	-0.147969	1.15786	-0.651855	0.736092	0.701915	0.121194	1.2059	-0.569545	-0.581718	-0.42685	-0.575072	2.04734	-0.288006	0.207693	1.66539	-0.517926	0.0381018	-0.444254	-0.61191	0.0646251	-0.0410826	0.0553134	-0.0748036
B3GALT4	0.328339	0.00108647	0.03683	0.761875	0.829427	1.02509	0.292469	-0.113963	0.00721329	-0.799642	-0.767485	0.212418	-0.0955338	0.124366	-0.492133	-1.08786	0.300549	0.513227	0.143134	0.451966	-0.454735	0.0196942	-0.404642	-0.729275
B3GALT5	-0.315273	-0.3134	-0.24082	-0.185811	0.349589	0.351161	0.420844	0.313454	-0.202593	-0.163083	-0.066016	-0.249123	0.527433	0.170719	0.508828	0.328196	0.00221083	-0.182526	-0.105683	-0.117479	0.530682	0.141366	0.408933	0.281043
B3GALT5-AS1	-0.196778	0.574504	0.428502	-0.201556	0.0386883	1.20369	0.061602	-0.224361	-0.0316012	0.138328	0.0587294	0.152215	0.000268198	0.0786064	0.040186	-0.217636	-0.407181	-0.848748	0.00381887	-0.378761	-0.130795	-0.494519	-0.220755	-0.179626
B3GALT6	0.820072	0.015833	1.11178	0.597943	0.503913	0.212855	-0.587525	-0.11247	0.91323	0.0856888	1.15091	1.05531	0.275701	0.112207	-0.379778	0.530935	-0.29011	-1.58126	-0.16953	-0.069078	-0.715417	-0.969104	-1.26418	-0.907704
B3GAT1	-0.740136	-0.723771	-0.694747	-0.704043	-0.00124008	-0.0902105	0.0860493	-0.109954	-0.630388	-0.628336	-0.509642	-0.625485	0.102672	-0.346812	0.106244	-0.126217	-0.577906	3.0476	3.7759	-0.658011	0.0680647	-0.261802	-0.0413659	-0.101476
B3GAT2	0.140115	0.576572	0.622172	0.359754	0.469315	0.66295	-0.253135	-0.272275	-0.0755976	0.0793572	0.72643	0.289614	-0.300692	-0.366468	-0.407096	-0.518214	-0.18013	0.159039	0.012722	0.578073	-1.03217	0.318622	-0.280092	-1.34739
B3GAT3	0.0789932	0.138194	0.22178	0.0311159	-0.374318	0.136666	0.0126182	-0.392601	0.215278	0.207752	0.389649	0.214725	-0.170987	0.406935	-0.132572	-0.212133	-0.498477	-0.485916	-0.380809	-0.29945	-0.374837	0.104943	0.170529	-0.235273
B3GLCT	-1.97643	1.36533	0.432518	1.09066	0.0112517	-1.03348	0.387773	-0.249102	-1.72254	0.909809	-0.22679	0.917198	-0.240314	-0.677751	-0.343096	-0.287568	-4.48775	0.60897	-0.941272	1.12999	-0.673506	-0.850606	-0.144635	-0.334496
B3GNT10	0.392796	-0.14936	0.0879274	-0.415484	-0.680937	-0.290298	-0.662519	-0.603054	0.685516	0.458878	0.517364	0.0553426	-0.420474	0.650808	-0.702383	-0.644237	0.62914	0.51415	0.302741	0.290569	0.131258	0.225828	0.100814	-0.423922
B3GNT2	0.229627	-0.205275	-0.298933	0.0825558	0.482188	0.149353	-1.37278	-0.160687	0.310788	-0.331106	-0.428248	0.062496	-0.0753021	0.486504	-1.9007	0.0386631	0.548463	0.273862	-0.0668583	0.235859	-0.144878	-0.0347007	-0.442947	0.933226
B3GNT3	-1.18239	-1.18314	0.406075	-1.02937	-0.442981	-0.373039	-0.12417	-0.295836	-0.945265	0.172456	0.185202	-0.97604	-0.145184	0.228432	-0.0904084	-0.0755976	-0.103403	0.551089	-1.62872	-0.794883	1.41727	1.16704	-0.0822834	0.411626
B3GNT4	-0.131825	-0.856665	0.130677	-0.766561	-0.195367	-0.135912	0.00791624	-0.208192	-0.727549	-0.72127	-0.642843	0.254996	0.599141	-0.342561	0.0423919	-0.256097	-0.697739	-0.981116	-1.02434	0.951813	-0.018925	0.136267	-0.09366	1.82282
B3GNT5	-0.617519	-0.624345	-0.584214	0.227313	-0.00764916	0.0764434	0.201194	0.0836148	-0.483462	-0.516163	-0.377627	-0.0873217	0.861958	-0.190108	0.274161	-0.0127932	-0.393684	0.382163	-0.366996	-0.522782	0.174639	-0.182913	0.143134	0.0449109
B3GNT6	-0.310106	-0.288195	-0.282383	-0.269222	0.430646	0.385062	0.447454	0.32737	-0.199316	-0.197616	-0.116274	-0.203093	0.599362	0.200152	0.525779	0.413459	-0.02418	-0.177449	-0.130752	-0.092537	0.636743	0.216989	0.412464	0.363994
B3GNT7	0.123469	0.514485	0.141066	-0.109074	0.703952	0.223738	0.316138	0.365193	0.0300899	0.0416848	-0.597634	-0.298827	-0.106008	0.487628	0.229219	0.658471	-0.0825735	0.0907824	-0.437456	0.0290093	-0.290215	0.742474	-0.195036	-0.22923
B3GNT8	0.0608801	0.132556	0.100589	-0.154116	-0.170868	0.325022	0.550577	-0.557174	-0.0548544	0.182266	0.435881	-0.034377	-0.406968	1.08071	0.760611	0.163603	-0.246515	-0.0358103	0.551561	-0.0249108	0.242987	0.591933	0.408723	0.93416
B3GNT9	0.471595	-0.179567	-0.611671	0.381454	-0.0237402	-1.05272	-0.478486	0.770541	-0.713749	-1.87001	-1.48829	-0.818208	-0.709726	-1.7467	-0.884122	-0.37916	2.36923	2.77892	2.04597	2.86594	2.47525	2.07443	1.39425	2.36287
B3GNTL1	0.241773	-0.040876	-0.77918	0.218816	-0.00590306	-0.47964	-0.852023	-0.54549	-0.00848676	0.0655253	0.235624	0.226053	0.159551	-0.248884	-0.598389	-0.326372	0.273067	0.717574	0.440561	0.601562	-0.157181	0.107908	0.0628937	-0.0507243
B4GALNT1	-0.397554	-0.457661	-0.385807	-0.570092	0.0402821	0.13539	0.209223	0.0480327	-0.300443	-0.291543	-0.187753	-0.533068	0.195377	-0.156757	0.543238	-0.0783278	-0.0998956	-0.328066	-0.46832	0.540291	1.33336	-0.152972	0.588579	0.0408547
B4GALNT2	-0.888217	-0.912319	-0.835393	0.76858	-0.299373	-0.297906	-0.036819	0.277242	-0.751341	-0.753932	0.809213	-0.154518	-0.0368375	-0.445852	0.0327871	-0.365078	-0.747413	-0.297486	-0.768045	0.392453	-0.094544	0.402385	-0.0977161	0.0547628
B4GALNT3	0.0249949	-0.758291	-0.454353	-0.233639	-0.00698441	-0.0978152	0.0622426	0.564876	-0.660529	0.130903	-0.227515	-0.626726	0.0911376	0.1232	0.0881121	0.550928	-0.614152	-0.83565	-0.0580144	-0.645296	0.0452215	0.783853	-0.0528011	-0.114937
B4GALNT4	-0.381773	-0.386995	0.102453	-0.404182	0.306419	0.198024	0.311056	0.198551	-0.271288	-0.268832	-0.207017	-0.340231	0.405111	0.00235781	0.422381	0.200023	-0.127021	-0.288819	-0.0834526	-0.263889	0.379569	0.628199	0.285044	0.173862
B4GALT1	0.978244	-0.235534	0.140277	0.0412766	-0.0786124	0.14882	0.592164	-0.229655	1.05671	-0.236438	-0.349559	-0.103694	-0.530322	-0.207071	0.468256	-0.529566	0.428624	-1.62284	-0.83239	-0.00186924	-0.217794	0.636278	0.676085	0.682077
B4GALT2	-0.308979	-0.257677	-0.611791	0.0161816	-0.106797	0.0602019	0.610249	0.600259	-1.97625	-1.87417	-2.04609	-2.11387	-1.15577	-0.959477	-0.363089	-1.48763	2.36471	2.12525	1.85669	2.53898	2.06643	1.7626	1.63322	1.845
B4GALT3	0.0126182	-0.134642	0.0308026	0.148695	-0.362901	-0.434489	-0.581662	-0.0438666	0.0368631	-0.313701	-0.121516	0.190953	-0.191942	-0.389781	-0.988148	-0.204938	3.0153	2.91624	2.6743	3.19134	2.57991	2.56265	2.03337	2.30948
B4GALT4	-0.290193	0.485379	0.178162	0.277192	-0.369059	-0.536057	-0.405494	0.318191	-0.245758	0.161898	-0.318679	-0.0792599	-0.57527	-0.896511	-0.531031	-0.199316	0.698887	1.10962	1.0572	1.04875	0.359192	0.240746	0.268087	0.815169
B4GALT5	-0.0301889	0.252204	0.446272	0.367589	0.833263	-0.0410046	-0.0788296	0.863493	-0.0469364	-0.0848995	0.155853	0.359273	0.732949	0.278436	-0.183881	0.535018	-1.86914	-1.27261	-1.00584	-0.870006	-0.482718	-1.13968	-1.92996	-0.713952
B4GALT6	-0.2778	0.0516007	-0.221085	-0.27993	0.421472	0.339712	0.432409	0.303	-0.16066	-0.126357	-0.0155036	-0.221082	0.55988	0.131673	0.480923	0.387841	0.0466983	-0.122179	0.0175051	-0.123071	0.78183	0.165022	0.376363	0.282686
B4GALT7	0.113863	-0.180277	-0.0449551	0.00291037	-0.526985	-0.7155	-0.669163	-0.291278	0.214213	-0.0359116	0.0766543	0.260967	-0.178543	-0.493601	-0.545501	0.229583	0.934747	0.780309	0.798512	1.20167	0.302209	0.796613	0.618186	0.951813
B4GAT1	0.0981772	-0.275612	0.148037	0.19199	0.378378	-0.112088	-1.23607	-0.344795	-0.0662964	-0.958101	-0.800978	0.244118	0.0544498	-0.803989	-2.18291	-0.621964	1.24574	1.41562	0.940512	1.68026	1.39425	0.43946	0.618562	0.632953
B9D1	0.221751	0.338307	0.382533	-0.0716235	-0.723933	-0.594557	-0.157371	-0.285092	-0.331386	-0.556578	-0.624663	-1.04468	-0.897241	-0.684428	-0.508769	-0.347822	5.46771	5.35462	5.2348	6.03276	5.46771	5.09363	5.49618	5.31881
B9D2	0.198747	0.296972	0.246875	0.0030677	-0.454185	-0.266484	0.188468	-0.246372	0.080729	-0.251773	-0.228434	-0.0349357	-1.19433	-0.259496	0.189686	-0.481522	0.671589	0.347011	0.0162025	0.356165	-0.543938	0.150244	0.0922565	-0.277083
BAALC	-0.373244	-0.27833	-0.341049	-0.300878	0.0615584	0.470719	0.757755	0.505904	-0.0388434	0.036609	-0.0330145	-0.198246	0.819405	0.486642	0.86097	0.456148	-0.868484	0.0688958	-0.527587	-0.664378	-0.180608	0.475547	-0.0188837	0.209035
BAALC-AS1	-0.599076	-0.607648	-0.0534127	-0.150205	-0.109431	-0.0754826	0.073045	-0.100148	-0.493766	-0.48625	-0.355323	-0.122258	0.169995	0.1305	0.111855	-0.191038	-0.381462	0.0370931	0.163142	0.325467	0.0144936	-0.297823	-0.0260919	-0.0764645
BAALC-AS2	-0.335405	-0.449563	-0.187443	-0.606015	0.611501	-0.265725	0.244373	-0.666112	-0.606459	-0.498016	-0.294789	-0.0878729	0.741391	-0.0900917	-0.0363247	-0.388317	0.0267227	0.29283	0.505689	0.274543	1.25568	0.875007	0.0536978	0.175572
BAAT	-0.877889	0.209068	0.830144	-0.68813	-0.11019	-0.0758538	0.0968807	-0.0761085	-0.777815	-0.736973	1.09282	-0.631052	0.0706782	-0.270237	0.187585	-0.188449	-0.727784	-1.01157	-1.00939	-0.741003	2.8675	-0.274346	0.0316246	3.15649
BABAM1	0.0813765	0.171539	0.155838	0.170364	-0.56851	-0.320435	-0.218668	-0.291573	0.0870697	0.113374	0.202466	0.160673	-0.569804	-0.11199	-0.459103	-0.337539	0.64176	0.485335	0.510429	0.668353	-0.201011	0.686571	0.597015	0.228323
BABAM2	-0.11797	-0.0598018	-0.177089	0.00158722	0.116733	-0.538601	0.129573	-0.135298	-0.125692	-0.0378058	-0.470323	-0.114312	0.208318	-0.360898	-0.232202	-0.293029	0.52915	0.4123	0.190862	0.399754	-0.0122879	-0.0868492	-0.191115	-0.245108
BACE1	-0.0457211	0.208318	0.258909	0.254827	-0.337399	0.467616	0.0323463	0.385115	-0.102112	-0.4154	-0.0702673	-0.0385338	-0.575575	0.257327	-0.425581	-0.201221	0.400225	0.191494	0.543828	0.155206	-0.229049	-0.121312	-0.251125	-0.392188
BACE1-AS	0.864614	0.109189	0.0488208	0.619685	-0.116908	0.534238	-0.894738	0.31952	1.25388	0.408521	-0.739298	0.837304	-0.501406	1.24516	0.1154	0.381773	-0.263486	0.198925	0.0104676	0.162883	-0.550069	-0.457474	-0.256007	-0.622552
BACE2	0.75462	0.19037	0.620862	0.428868	-0.00676379	0.572967	0.817196	0.574992	0.628681	-0.0141577	0.181555	0.283446	0.74733	0.614138	-0.302675	-0.932757	-0.83239	-1.08679	-2.07225	-1.71216	-0.99062	-0.997624	-0.839847	-1.26387
BACH1-AS1	-0.502943	-0.0914422	0.100754	-0.167826	0.785963	-0.478997	0.292252	-0.482014	0.147802	0.529075	-0.717689	0.277199	-0.127137	0.989884	0.762522	0.149038	-0.581302	0.972273	-2.61094	-0.0732689	-0.656262	0.576978	0.125097	0.0062649
BACH1-IT1	0.455408	0.553095	0.579371	0.0862646	-0.521248	-0.850091	0.795929	0.319393	0.818112	1.09418	0.886249	0.213515	-0.403579	0.139078	2.15727	-0.2799	0.150747	0.122602	0.0784817	-0.448537	-0.277396	-0.638665	-0.142172	-0.650171
BACH1-IT2	0.215207	0.23707	1.57088	-0.430679	-0.675013	-0.671145	0.777901	-0.558126	-1.09062	1.01101	0.724933	0.106381	-0.0411146	0.643666	2.34844	0.774239	-1.08851	-1.51539	-1.86569	-1.47591	-0.342087	-0.1137	0.50744	0.4158
BACH1-IT3	0.218098	0.387589	0.207751	0.438192	-0.676772	0.0495283	0.0674142	-0.987445	-0.00361203	0.228581	0.0746881	0.427788	-1.02869	0.607262	1.80016	0.413868	-1.91953	-0.845695	-0.501882	0.257041	-0.179428	-0.0962678	-0.376187	-1.60137
BACH2	0.642655	0.371504	0.731329	0.514077	-0.583759	-0.962266	-0.927067	-1.27592	2.61101	2.28597	2.59624	2.8052	1.37084	1.70157	1.37197	1.86702	-1.92259	-2.63414	0.0758473	-1.43794	-2.38642	-3.79714	-4.67347	-3.70807
BAD	0.175407	0.275073	0.371687	0.0889509	-1.02937	-0.221893	-0.17619	-0.34321	-0.125515	0.0892506	0.103602	-0.0939923	-0.69159	-0.310486	-0.498956	-0.0396041	0.368724	0.504894	0.116243	0.52869	-0.408629	0.290233	0.231783	-0.272068
BAG1	-0.30804	-0.242986	-0.327959	-0.305592	-0.477671	-0.594027	-0.097974	-0.150627	-0.124414	-0.110131	-0.282871	-0.0882362	-0.432872	-0.6382	-0.181326	0.117684	1.1303	0.845626	0.775986	0.957433	0.816388	0.696985	1.13779	0.996061
BAG2	0.335175	0.238874	0.173327	0.391653	0.145612	-0.572892	-0.511658	-0.395176	-0.210404	-0.736674	-0.612074	-0.0765222	-0.759289	-1.51067	-1.5752	-1.66756	1.15751	0.712538	0.743304	0.975776	0.851302	0.51014	0.0680647	0.842794
BAG3	0.068072	1.18815	1.05575	0.0281487	-0.0218722	-1.30303	-0.459487	0.161649	-0.568069	-1.32618	-1.03073	-1.08625	-0.822381	-0.686098	-0.549852	-1.08117	2.55445	2.37119	2.29976	2.56207	1.00375	0.458808	0.858534	1.75576
BAG4	-0.760618	-0.660464	0.0387488	0.0509301	0.920662	-0.902561	-0.250572	-0.739354	-0.0291977	-0.0803259	-0.0105864	0.052296	0.411285	-0.637706	1.06343	0.349742	-0.167718	0.17679	0.594032	0.145365	1.41562	-0.717971	-0.121652	0.283477
BAG5	0.365538	0.21462	0.259441	0.0980105	0.324035	-0.280499	-0.24794	-0.252875	0.392733	0.138592	0.178099	0.212794	0.189898	-0.116979	-0.306333	0.218807	0.082515	-0.0865828	-0.168907	0.0930897	-0.280401	-0.621006	-0.231199	-0.264915
BAG6	0.0749312	0.186436	0.182894	0.204134	-0.673969	-0.281591	-0.163417	-0.388111	0.144496	0.201218	0.17615	0.260187	-0.718407	-0.0924519	-0.453411	-0.532916	0.650017	0.597743	0.497662	0.785572	-0.124373	0.578791	0.668353	0.315976
BAGE	0.508406	0.589892	0.247751	0.348165	0.494396	-0.559438	-0.163519	-0.650823	0.591725	0.669133	0.188146	0.0562289	-0.0824305	-0.372062	0.210564	-0.42685	-0.579549	0.093403	0.109923	-0.5306	-0.337336	-0.664901	-0.511517	-0.61049
BAGE4	-1.35451	0.556377	0.540609	-0.23246	2.64785	-0.684683	-0.3577	0.162523	-1.15338	-1.05145	0.871345	-0.713348	2.8249	0.566439	-0.296748	0.725782	-0.924583	-1.45935	0.101624	-1.34443	1.84402	-0.685158	0.683451	-0.0357454
BAHCC1	-0.490195	-0.446286	-1.08507	-0.68666	-0.512488	-0.0978479	-0.306481	-0.630461	0.579176	0.597594	0.328396	-0.0124848	-0.285851	0.0747338	1.42111	3.57781	-1.01497	0.957669	2.018	0.16029	-0.275547	-0.619714	-0.327109	-0.505967
BAHD1	0.314991	0.198311	0.328467	0.235475	-0.307663	-0.321356	-0.259838	-0.272113	0.488073	0.216757	0.364975	0.557973	-0.268513	0.142722	-0.283681	-0.233043	0.192423	0.0337612	0.0715194	0.276432	-0.60453	-0.476896	-0.640435	-0.419387
BAIAP2	-1.33995	-0.908148	-0.129158	-0.16438	-0.385624	-0.55091	-0.489724	-0.595154	0.646181	0.699765	0.893004	0.752348	-0.00994019	0.752616	-0.233562	-0.229339	-0.985572	0.520524	0.020927	-0.148902	-0.542865	0.0540968	0.0838526	-0.393621
BAIAP2-DT	0.240858	0.825436	0.175734	0.165851	-0.487773	0.219893	-0.0310839	-0.499597	1.17255	0.745205	1.53936	1.10933	0.00838071	0.457238	-0.453269	-1.27994	-1.57014	0.968706	1.43378	0.162376	-0.762473	-1.10255	-0.485815	-1.74111
BAIAP2L1	-0.316751	-0.841698	-0.969386	-0.676001	-0.433554	-0.193302	-0.603094	0.306975	0.148219	-0.0851744	-0.511058	-0.0866707	-0.403201	0.387476	0.392569	0.231345	0.310502	0.140586	0.054271	0.845384	-0.539219	-0.0629846	0.257691	0.488065
BAIAP2L2	0.321057	-0.222519	0.401158	0.0388551	-0.830156	0.568429	0.16617	-0.353727	0.274535	-0.070679	-0.296209	-0.195982	-0.432107	0.224746	-0.231167	0.283681	0.562153	1.06587	0.65175	0.567702	-0.793389	0.455982	-0.28521	0.00314917
BAIAP3	2.84786	3.38067	2.76867	3.27724	3.29822	1.62758	0.701915	2.29269	-2.204	-1.83843	-2.01414	-2.35806	-0.527983	-2.14152	-2.79253	-1.30469	0.640374	1.51635	1.30867	0.338869	-0.591233	-1.46523	-1.5988	-0.360151
BAK1	0.0103489	0.176243	-0.0325502	-0.0454829	-0.652842	-0.0644924	0.656187	0.327261	-0.69937	-0.872739	-0.886376	-0.446321	-1.37888	-0.794267	-0.262769	-1.01478	2.36287	1.76625	1.51583	2.12762	1.65409	2.03076	1.4705	1.9562
BAMBI	1.89148	0.280492	2.26858	-0.408128	-0.0523827	-0.671602	1.22907	-0.968738	1.83652	0.171876	1.0119	-0.41771	-3.48919	-1.49101	-0.364932	-0.591625	0.883141	1.37603	1.36662	-1.27908	-0.643039	-1.02856	0.238701	1.11245
BANF1	0.198024	0.37004	0.104828	0.256786	-0.565819	-0.195197	-0.530209	-0.885356	0.0885192	0.173624	0.100825	0.40496	-0.404203	-0.179574	-0.805901	-0.474324	1.39918	1.05189	1.02815	1.0665	0.165856	0.957669	0.659144	0.636635
BANF2	-0.537529	-0.537726	-0.50196	-0.513397	0.174292	0.0696904	0.19791	1.00106	0.666291	-0.413579	-0.340019	-0.439495	0.678193	-0.225194	0.208078	0.0806903	-0.305022	-0.499811	-0.353609	-0.404966	0.205846	-0.0949008	0.0865961	-0.00887589
BANK1	0.491226	0.552871	0.47959	0.766723	0.605807	0.0652305	-0.320787	0.0224257	0.146078	0.221491	0.202887	0.419822	-0.00820375	-0.343641	-0.302336	-0.360999	-2.30847	-2.72379	-3.06831	-2.65493	-2.72773	-3.68783	-3.58912	-3.63574
BANP	0.648763	0.445929	0.461584	0.419438	-0.739964	-0.453143	-0.698003	-0.20732	0.817649	0.687442	0.711907	0.783115	-0.353845	-0.307085	-0.208126	0.201505	0.116643	-0.0057588	-0.236544	0.02126	-0.764073	-0.488713	-0.750286	-0.363918
BAP1	0.164551	0.238007	0.137316	0.106982	-0.620325	-0.85539	-0.59022	-0.359852	0.132017	0.308384	0.307196	0.242972	-0.311309	-1.0208	-0.454301	-0.225065	0.676462	0.509806	0.465564	0.62291	-0.0903893	0.0507788	0.0747958	-0.142515
BARD1	-0.162575	-0.182171	-0.423158	-0.0705747	-0.331997	-0.47312	-0.420325	-0.338241	0.245944	0.243536	0.215555	0.309255	-0.303081	-0.283681	-0.285776	0.55937	0.330815	0.139486	0.317629	0.283477	0.383036	0.592404	1.05302	0.638681
BARHL1	-0.680004	-0.661906	-0.618351	-0.715032	-0.185759	-0.137899	0.0642549	-0.130529	-0.556153	0.120731	-0.36484	-0.676845	0.0727408	-0.0887084	0.119868	-0.230369	0.406804	-0.679005	0.164881	-0.785434	0.0130325	2.19259	-0.028405	-0.125895
BARHL2	-0.90851	-0.771924	-0.528974	-0.718167	-0.233508	1.3398	0.049796	1.25889	-0.784343	-0.756841	-0.645633	-0.677642	0.028556	0.45923	0.0787587	-0.224092	-0.74228	0.629874	-1.14193	-0.433779	0.00724009	0.853508	-0.0461315	0.690437
BARX1	-0.29435	-0.25677	-0.226158	-0.000839145	0.404351	0.321522	0.436526	0.309051	-0.161167	-0.159003	0.00361088	-0.245335	0.558459	0.115788	0.545071	0.36874	0.0191653	-0.116863	-0.0442182	-0.151115	0.584424	0.141717	0.404216	0.32064
BARX2	-0.264979	-0.262886	-0.230556	-0.25677	0.490906	0.354434	0.492919	0.332505	-0.131264	-0.113083	-0.0475352	-0.194874	0.661999	0.157915	0.566837	0.425428	0.0513163	-0.110333	0.0665671	-0.081931	0.672539	0.284923	0.443671	0.335001
BASP1	0.178717	0.347228	0.228421	0.258173	0.179618	0.335946	-0.299908	0.145612	-0.0494629	-0.255448	-0.773494	-0.123231	-0.371926	-0.319219	-0.347746	-0.209754	0.082345	0.363026	-0.122057	0.301464	-0.651284	-0.188554	-0.322718	-0.136476
BASP1-AS1	1.17801	1.89776	0.974008	1.22272	0.886922	-0.0826838	-0.543344	0.508406	0.213302	0.506711	-0.310371	-0.651322	-0.277321	0.287444	-0.431823	-0.659569	-1.11176	-1.0468	-1.66356	-1.26699	-0.492184	-0.560795	-0.368017	-0.325313
BASP1P1	0.286583	0.232411	0.290708	0.210061	-0.164312	-0.375618	-0.357627	-0.122908	-0.0747174	-0.147288	-0.489254	-0.0616032	-0.149584	0.0828591	-0.458	0.0763014	0.219706	0.31055	0.130145	0.269806	-0.423138	0.0719511	-0.303592	0.164162
BATF	0.256876	-0.56851	-0.553171	0.15828	-0.0432799	0.973104	-0.29594	0.350195	-0.712865	-2.11192	-2.08232	-0.690102	-0.610361	0.18717	-1.28667	-0.800978	0.600858	0.247927	-0.459939	0.364968	-0.219287	0.677766	0.196286	0.339504
BATF2	1.35097	0.424049	1.03486	2.46639	2.41929	2.61359	-1.82074	2.15734	0.189192	-0.0550402	-0.226616	1.34264	4.42107	2.51401	-1.89184	2.22693	-3.32732	-4.04484	-3.61167	-3.14826	-1.65658	-1.20996	-1.70148	-0.278955
BATF3	-0.0189916	-0.108478	-0.116875	0.36904	1.36952	1.30535	1.21482	1.33657	-1.31114	-0.946156	-1.65476	-2.04798	-1.01098	-0.615929	-0.342879	-0.465549	1.17963	1.18798	1.4923	0.571557	-0.00705294	-0.0999665	0.634297	-0.417292
BAX	0.278488	0.299769	0.405289	0.100158	-0.769116	-0.138505	0.208421	-0.782295	-0.23858	0.2662	0.163971	0.0834505	0.0266559	0.264881	0.871345	0.231593	0.0728169	-0.0331874	-0.354313	0.093792	-0.505129	-0.279479	0.257957	-0.339166
BAZ1A	0.214962	0.15417	0.203928	0.334888	0.00121394	0.211401	-0.715923	-0.156132	0.367264	0.35432	0.332465	0.55671	-0.136191	0.402883	-0.439624	0.120426	-0.450519	-0.612855	0.0524609	0.0152112	-0.411003	-0.436386	-0.706829	-0.411668
BAZ1B	0.326117	0.0913256	0.0968035	0.355151	-0.471206	-0.0698844	-0.739292	-0.53639	0.398107	-0.0789256	0.0761372	0.368172	-0.694397	0.155327	-1.21572	-0.669764	0.597015	0.0216373	-0.158349	0.493291	-0.29548	0.479934	0.087268	0.107939
BAZ2A	0.584843	0.752898	0.677094	0.537889	-1.09564	-0.769024	-0.857032	-0.281697	0.9621	1.10357	0.937986	0.948607	-0.659405	-0.356742	-0.297044	0.368941	0.296277	0.339741	0.224566	0.227703	-1.55365	-1.20547	-0.756841	-1.37838
BAZ2B	0.00765832	0.107733	-0.0943756	0.696218	0.458771	-0.495782	-1.68093	-0.270935	0.406818	0.622049	0.324998	0.815975	0.029158	-0.0771248	-0.410291	0.189033	-0.375706	0.402622	0.449719	0.275171	-1.00162	-0.968912	-1.52757	-1.57297
BBC3	0.0078731	1.04463	0.390082	0.142477	0.696351	0.497142	1.3633	0.691214	-2.41691	-1.67088	-2.86928	-2.72167	-0.207369	-0.589724	0.437284	-0.911806	1.42941	1.47981	0.825456	0.434716	-1.12726	-1.55284	-0.518467	-1.43321
BBIP1	0.311693	0.293383	0.0566921	0.232411	0.279386	-0.494725	-0.610238	-0.561536	0.550213	0.448418	0.537954	0.45756	0.057799	-0.58504	0.021068	-0.611478	0.412675	0.247284	0.140295	0.213966	-0.334965	-0.438705	-0.551477	-0.478
BBOF1	0.569975	0.56499	1.52388	0.822709	-0.606082	-0.624981	-0.137849	-0.253932	0.941512	1.04191	1.04925	1.08874	-0.163035	0.454376	-0.368634	-0.0923248	-0.436663	-1.58208	-1.3838	0.20323	-0.6308	-1.18324	-0.209581	-0.642371
BBOX1	-0.572331	-0.594951	-0.17446	-0.47398	0.0463807	2.01889	0.231945	0.14496	-0.452435	-0.451528	-0.385423	0.191575	0.236242	-0.0789256	0.272667	0.0673105	-0.315593	-0.567694	-0.611125	-0.231413	0.264322	-0.0526653	0.1742	0.0941235
BBOX1-AS1	0.340262	0.300102	0.167129	-1.12295	2.09346	-0.50947	-0.224808	-0.512881	-1.05706	0.663824	-0.889825	-1.0167	-0.22881	-0.635088	-0.135593	0.286612	-0.69346	1.55472	0.333648	-1.19108	0.18378	-0.576378	-0.238554	-0.402842
BBS1	0.489118	0.0255112	-0.0375711	0.244118	0.172931	-0.263154	-0.804842	0.0328967	0.195872	-0.0445513	-0.361523	0.608349	0.0320354	0.00664748	-0.599804	1.00206	0.269375	-0.0267833	-0.625344	0.358419	-0.279424	-0.2743	-0.597749	-0.636571
BBS10	0.854536	0.14678	0.076889	1.29853	0.969316	0.914683	-0.847735	-0.160428	1.02184	0.357896	0.382981	1.60638	0.81846	0.663824	-1.21069	0.561663	-1.0235	-0.736309	-1.84853	0.0498484	-0.531712	-0.874839	-1.49933	-1.05059
BBS12	-0.514648	-0.612604	-0.960609	0.735893	1.04064	-0.350439	-1.16513	-0.570265	0.224027	-1.05025	-0.685767	0.212513	0.869588	-0.459226	-1.13006	-1.4068	0.445336	0.607585	0.408212	1.55326	1.46324	0.234244	-0.807439	-0.161114
BBS2	0.360114	0.333332	0.138267	0.911527	-0.171524	-0.110487	-0.869562	0.205535	0.284759	0.288691	0.0761804	0.624926	-0.246222	0.113194	-0.788392	0.0748564	-1.30453	-1.16471	-1.53515	-0.226347	-1.23561	-1.86569	-2.35811	-1.55878
BBS4	0.479494	0.395822	0.410593	0.375868	-1.04765	-0.323271	-0.21572	-0.505369	0.911636	0.989425	0.792197	0.916413	-0.53963	0.368941	-0.0411146	-0.241585	-0.176778	-0.0667983	-0.218682	-0.1351	-1.15031	-0.761959	-0.583868	-0.877072
BBS5	0.689745	0.639489	0.46474	0.338718	0.413399	-0.470379	-0.439582	-0.560772	-0.565416	-0.472196	0.285552	-0.109255	-0.637706	-0.355389	-0.292984	-0.620192	0.692715	0.425937	0.0489712	0.505412	-0.110255	0.432042	-0.478665	0.159039
BBS7	0.639611	0.196974	0.10365	0.169654	0.649775	-1.1646	-0.612982	0.470719	0.518768	-0.344609	0.294648	0.129653	-0.266258	-0.902866	-0.871843	-0.23684	0.897711	0.632725	0.196734	0.729156	0.951813	-0.319333	-0.0752507	1.22264
BBS9	0.204854	0.202279	0.371099	0.186345	0.34611	-0.627732	-0.392746	-0.473056	0.432814	0.34602	0.187478	0.402497	0.65287	0.404644	-0.0974568	0.136836	-0.258157	-0.0915136	-0.0117091	0.140213	-0.23069	-1.63466	-1.44341	-0.866887
BBX	0.390324	0.533047	0.657876	0.216178	-0.359929	-0.252583	-0.552238	-0.735738	0.55053	0.835427	0.774031	0.443006	-0.19937	0.16668	-0.122432	-0.0860149	-0.933762	-0.375834	-0.287386	-0.53295	-1.27046	-1.33234	-1.24354	-1.42852
BCAM	-0.713047	-0.288969	-0.897206	-0.31387	-0.457905	0.1646	-0.170768	0.0114366	-0.817558	0.416993	1.71773	-0.996989	-0.134558	0.271893	-0.149974	-0.578616	0.0316246	0.0902415	-1.26729	0.434873	-0.176656	-0.376989	-0.230311	0.450309
BCAN	-0.422829	-0.381424	-0.393993	-0.235452	0.248142	0.455791	0.561184	0.380573	-0.271448	-0.30354	-0.123342	-0.240491	0.584667	0.204475	0.643131	0.385454	-0.118002	-0.302293	-0.137709	-0.183556	0.725119	0.416259	0.528484	1.12128
BCAP29	0.395297	0.451898	0.575276	0.693066	0.193035	0.133155	-0.622741	-0.505243	0.853719	0.795646	0.92424	0.985767	-0.354644	0.27151	-0.356216	-0.288066	-1.83129	-1.93387	-0.837539	-1.30315	-1.88917	-1.65075	-1.35267	-1.79428
BCAP31	-0.121776	-0.114006	0.105398	-0.0521262	-0.0447705	-0.0308456	-0.221465	-0.361603	-0.0251904	-0.104883	-0.0243235	0.0731208	-0.209805	-0.150546	-0.465353	-0.343317	0.600449	0.485415	0.487641	0.783352	0.519091	0.659355	0.975162	0.52869
BCAR1	-0.633985	-1.0075	-1.07978	-0.997604	-0.438302	0.554301	-0.0550625	0.250555	-0.111786	-0.0468036	-0.821976	-0.430248	-0.177376	-0.344609	-0.0442334	0.108906	1.71842	1.56425	1.30987	2.40512	1.47303	2.34314	1.75576	1.42712
BCAR3	-0.390757	-0.399858	-0.550325	-0.12405	-0.558994	-0.133907	0.943108	1.38003	-1.71163	-1.88668	-2.30886	-1.54921	-0.274982	-0.696272	-0.0438956	0.484393	0.492482	0.292949	-0.0895298	1.38383	-0.285158	0.412675	0.144375	0.894702
BCAR4	0.836792	-0.00299321	0.141648	-0.774868	-0.53013	0.801009	-0.32763	-0.678167	1.53837	0.328782	-0.92626	-0.565059	-0.329704	-0.77472	-0.268896	0.945211	-0.931275	0.504281	1.44152	0.0984936	-0.300659	0.0495595	1.00632	1.06587
BCAS1	0.346771	2.16036	0.495604	1.21883	1.91465	0.661646	2.17778	2.13829	-3.22826	-2.66157	-2.66157	-3.46879	-0.192023	-2.5131	-0.0325136	-1.45977	-0.89685	0.307188	-0.807631	0.291713	-1.50032	-0.587584	0.884194	-0.672375
BCAS2	0.0182129	-0.00269923	0.151437	-0.0390565	-0.0131421	-0.492951	-0.366488	-0.104137	0.17599	0.0627378	0.140238	-0.0123956	-0.242215	-0.65859	-0.289269	-0.326943	0.641394	0.352483	0.478843	0.783238	0.557984	0.161133	0.654543	0.676557
BCAS3	0.356087	0.434837	0.213464	0.414944	-0.139065	-0.755856	-0.281243	-0.393073	0.304322	0.46105	0.398533	0.379112	-0.142026	-0.533353	-0.231759	-0.362157	0.300861	0.751062	0.646556	0.515268	-0.243244	-0.614929	-0.955403	-0.587584
BCAS4	0.00962118	0.212828	0.0162655	0.113313	0.509861	0.287211	0.309923	0.341872	-0.0299834	-0.100299	0.0478617	-0.16412	0.0318163	0.415934	-0.0829729	0.240593	-1.24907	-0.958983	-1.53112	-1.43842	-1.30965	-1.26418	-0.904419	-0.852323
BCAT1	1.0363	0.107465	0.499637	0.623853	1.32854	0.566261	0.894326	1.38635	0.0875016	-1.77322	-1.66917	-1.4207	-0.608492	-0.911191	-0.780114	-0.682846	1.00167	1.22264	-0.828878	0.447809	-0.433303	-1.05023	0.328653	-0.623818
BCAT2	0.15572	0.0149293	0.0468962	0.194893	-0.323185	0.322434	-0.0882379	-0.0318672	-0.0610019	-0.304705	-0.331124	0.0232128	-0.557695	0.165557	-0.55274	-0.70271	0.631005	0.334925	0.359996	0.70371	-0.1179	0.692715	0.598727	0.686024
BCCIP	0.275825	0.0371364	-0.00927886	0.116199	0.144599	-0.802563	-0.947764	0.0270439	0.337987	0.128944	-0.201712	0.310714	0.0414915	-0.7828	-1.03968	-0.0228341	0.842603	0.507865	0.942746	0.634056	0.937194	0.326462	0.466215	0.568221
BCDIN3D	-0.119137	-0.132188	-0.297509	0.310793	0.440714	-0.216151	-0.870378	-1.17111	0.389317	0.407717	0.701243	0.960054	0.244337	0.386049	-0.58123	-0.216041	-0.0529367	0.177993	-0.622436	0.698887	-0.137516	-0.180951	-0.747413	-0.973751
BCDIN3D-AS1	-0.770497	-0.784252	-0.759472	-0.783389	0.347849	-0.181362	0.00487098	-0.252485	1.59113	-0.06759	0.603558	-0.686436	0.055378	-0.364135	0.0235092	-0.247683	-0.622699	-0.872608	-0.867145	0.0464499	0.00268991	1.08108	-0.108135	-0.174109
BCHE	-0.780013	-0.0788296	-0.750267	-0.799334	-0.0369638	0.82848	0.0259271	-0.23488	-0.655647	-0.650104	-0.597201	0.908868	0.0664542	-0.292536	0.070904	-0.262578	-0.638517	0.336135	0.862086	-0.757734	-0.00513289	-0.347573	1.47097	0.532236
BCKDHA	0.457276	0.284637	0.465119	0.481101	-0.35242	-0.354376	-0.0778413	-0.428446	0.567935	-0.0160889	0.420829	-0.0468647	-0.273207	-0.491877	0.0530431	-0.492074	0.302135	0.530184	-0.0577491	0.155686	0.251216	0.233894	0.336505	0.669798
BCKDHB	0.136129	0.192557	0.224225	0.378012	-0.543998	-1.28399	-0.790891	-0.11826	0.283255	0.377635	-0.102767	0.212152	-0.263776	-0.990468	-0.952661	-0.61108	0.734274	0.651064	0.852527	0.930008	-0.206604	-0.722805	-0.58854	-0.16189
BCKDK	-0.0789757	-0.187377	-0.207388	-0.105305	-0.000209183	-0.376763	-0.0798409	-0.0769067	0.0628144	-0.632496	-0.444611	0.033947	-0.293173	-0.425367	-0.603926	-0.497798	2.07873	2.17299	1.90702	2.16908	2.0765	1.85395	1.92433	1.80192
BCL10	-0.597338	-0.590312	-0.562025	-0.500473	0.173432	0.0656501	0.217454	0.0709779	-0.488477	-0.472329	-0.402893	-0.429098	0.24781	-0.22881	0.247373	0.0822354	-0.389317	-0.581751	0.572774	0.119941	0.21437	-0.091639	0.128562	0.0198361
BCL11A	0.597943	0.381145	0.644394	0.38611	-0.168472	0.0762913	-0.543506	-0.622519	0.996918	0.768588	0.816863	0.930882	0.227816	0.448418	0.0351384	0.185242	-2.55333	-3.22403	-1.41842	-2.98687	-3.05835	-2.85755	-3.68783	-3.01311
BCL11B	-1.2716	-0.00874635	-0.280499	0.192972	0.108414	-0.170868	0.306178	0.938691	-1.19051	-1.0072	-1.53936	-0.1217	1.34264	0.324026	-0.0840868	0.87862	0.182701	0.787625	0.991994	-0.384991	0.0902415	0.160887	-0.698107	-0.601253
BCL2	0.471027	0.659742	0.680576	0.330575	0.596982	0.293383	0.0878677	-0.202465	0.411805	0.59389	0.410464	0.158117	0.234195	-0.105951	-0.30398	-0.440706	-1.49479	-0.359147	-0.443383	-0.968086	-1.24907	-2.04419	-2.27968	-1.929
BCL2A1	1.14871	0.656006	0.98866	0.841	0.641823	0.733132	1.28018	0.838808	0.0810501	-0.267719	-0.612351	-0.0549694	-0.278662	-0.222682	1.01047	0.142402	-0.886249	-0.722476	0.197249	-1.50663	-1.6556	-1.54309	-1.35598	-1.0468
BCL2L1	0.162641	0.301807	0.102661	0.187296	-0.353109	-0.688673	-0.546077	-0.168385	0.09264	0.181555	0.222528	0.0785034	-0.16412	-1.17297	-0.821976	-0.395307	2.29249	1.91889	1.96232	2.15992	1.90289	1.74223	2.04735	2.352
BCL2L10	0.760801	1.29447	0.981227	1.20325	3.3395	-1.11654	-0.688049	1.03528	-0.996125	-1.55844	-0.650371	-0.886092	-2.3808	-1.05666	-2.1698	2.61101	0.753633	2.04838	1.46497	0.8695	2.00409	-2.19358	-1.28317	-1.16659
BCL2L11	-0.186638	0.354675	0.537608	-1.029	-1.1808	-0.853787	1.32024	-0.720948	-0.414917	0.329082	0.0186399	-0.390102	-0.878567	-0.518871	1.53341	-0.906863	0.580801	0.816546	0.641857	0.779569	-0.236318	0.730306	1.48791	1.18572
BCL2L12	0.199411	0.175734	0.310998	0.188026	-0.223039	0.0719928	-0.156055	-0.368619	-0.43091	-0.84829	-0.673679	-0.176537	-0.866498	-0.834534	-0.962518	-0.878567	1.67009	1.20823	0.981729	1.49175	1.25435	1.81674	1.70031	1.69837
BCL2L13	0.223466	0.0682089	0.118991	0.19885	-0.605382	-0.828009	-0.311005	0.237238	0.421582	0.385864	0.347966	0.287534	-0.257709	-0.277751	-0.598269	0.255783	0.517223	0.373795	0.172183	0.398681	-0.45091	-0.529304	-0.548568	-0.4015
BCL2L14	-0.746089	-0.294835	0.513631	-0.836539	-0.281388	-0.243473	0.01108	1.10213	-0.607954	-0.617781	-0.452493	-0.784755	-0.0131146	-0.443719	0.0668716	1.49622	0.325975	-0.741003	-0.669839	-0.924315	-0.0350215	0.54493	-0.059098	-0.0862599
BCL2L15	-0.23246	-0.225861	-0.374915	-0.172941	-0.284301	-0.248328	-0.0238258	-0.482946	-0.0646268	-0.00812526	0.147192	0.0500723	-0.15029	0.385389	0.258977	-0.395733	1.38214	1.43607	1.78521	1.59474	1.92676	1.70486	1.54973	1.29798
BCL2L2	0.216396	0.491389	0.378632	0.332645	-0.231911	-0.337399	0.173327	0.120628	-1.09909	-0.545006	-1.18433	-1.02057	-0.610748	-0.819386	-0.249466	-0.608686	0.286335	0.560305	0.638101	0.456089	-0.474447	-0.530042	-0.344094	-0.525257
BCL3	0.334476	1.97026	1.63037	0.137389	-0.562753	0.194491	1.62292	-0.047115	-0.14907	1.3207	0.827744	-0.284731	-0.887786	-0.446886	1.18786	-1.18277	-0.0427903	0.129223	0.53624	-0.300659	-0.818108	0.0389139	-0.135332	-0.61465
BCL6	0.0436483	-0.3086	0.330014	0.160334	-0.740873	-0.261144	1.15315	-0.544651	2.66534	2.51401	2.65609	2.75554	1.45911	1.64162	2.33373	2.04734	-3.96065	-1.81163	1.56425	-2.8722	-4.67347	-3.63574	-1.2565	-2.95225
BCL6B	-1.07113	1.4891	0.0851193	0.165035	0.832105	-0.157209	0.775222	-0.435287	-0.0379368	0.382981	-0.775103	-0.0560736	1.02333	0.391114	-0.100806	-0.445126	-0.924315	0.92702	0.378781	0.234155	-0.140691	-0.480533	-0.202985	-0.34944
BCL7A	1.05404	-0.178774	0.172706	0.270262	-1.85897	-0.758291	-0.328617	-0.751518	2.77454	2.14875	2.49197	2.39239	-0.36036	1.70821	1.49822	1.81041	0.111181	-0.319118	0.327349	0.245053	-0.763621	-0.0823831	-0.419527	-0.529416
BCL7B	0.358955	0.409836	0.34181	0.177589	1.71056	-1.02594	-0.580147	-0.284981	0.163971	0.324665	0.309551	0.159822	1.49622	-0.288812	-0.305838	0.113328	0.647023	0.166562	0.336404	0.124827	1.51548	-0.4015	-0.432365	-0.38704
BCL7C	0.292321	0.410181	0.277078	0.640022	-0.0197398	-0.54892	0.517022	-0.582586	0.587757	-0.311398	0.290795	-0.00505124	0.149963	0.255783	-0.214573	-0.423903	-0.432298	-0.417744	-1.20936	-0.220208	-0.68766	-0.510984	-0.811199	-0.655102
BCL9	-0.254076	-0.225888	-0.142566	-0.466243	0.108645	-0.343283	0.957091	-0.296052	-0.390274	0.127578	-0.0250289	0.0265664	-1.20532	-0.135379	-0.244345	-1.64871	2.24727	1.91195	1.40199	1.60981	1.6142	1.09241	2.16908	1.0837
BCL9L	0.52808	0.19109	0.341624	0.365241	-0.519329	-0.38537	0.670214	0.222429	0.938675	0.346073	0.651317	0.453841	-0.352148	0.325633	0.70072	0.241597	-0.950618	-1.40403	-0.751744	-1.18663	-1.72267	-1.45125	-2.03385	-1.7288
BCLAF1	0.395361	0.432135	0.496471	0.164348	-0.549586	-0.383076	-0.450502	-0.574466	0.448317	0.501502	0.39882	0.162553	-0.60324	0.0329324	-0.139304	-0.508588	0.297764	0.0740779	0.0898172	0.0661493	-0.74793	-0.661128	-0.225244	-0.283259
BCLAF3	0.920662	0.624226	0.754136	0.868287	0.626919	-0.253265	-0.598129	-0.645518	0.809833	0.491448	0.43595	0.643477	0.127439	0.201085	-0.12848	-0.777432	-0.129557	-0.0127717	-0.0515453	-0.0210571	-0.620776	-0.71164	-0.959558	-1.57267
BCO1	-0.360969	-0.360149	-0.347529	-0.221516	0.577646	0.47372	0.573419	1.14871	-0.232875	-0.211846	-0.12983	-0.227809	0.688089	0.20874	0.675597	0.417314	-0.0219192	-0.236634	-0.289657	-0.160041	0.732119	0.24985	2.63398	0.71475
BCO2	0.841274	0.718153	0.337936	0.944461	-0.655695	-0.374831	-0.700833	-0.353013	0.722129	0.152025	0.104759	0.234319	-0.114413	-0.355284	-0.710662	-0.411623	1.00109	0.503509	0.0848515	0.619398	-0.359018	0.314946	-1.1306	-0.282574
BCOR	0.192889	-0.0541203	0.298373	0.356981	-0.711384	-0.604103	-0.459139	-0.409679	0.770363	0.972901	0.663621	1.11921	0.0761372	0.4603	-0.169638	0.158063	-0.829359	-0.11976	0.211879	-0.00313019	-0.521719	-0.0331463	-0.289291	-0.126133
BCORL1	0.881293	0.557876	0.379791	0.706609	1.00604	0.692504	-0.296026	-0.469936	0.484771	0.305747	0.0792742	0.456196	0.359185	0.559281	-0.607741	-0.311219	-0.98629	-1.09397	-0.818972	-0.239756	-0.958795	-1.00777	-1.58081	-1.24454
BCORP1	-0.0496701	-0.367743	-0.115613	-0.434566	0.138267	0.29237	0.0210734	-0.480433	-0.373782	-0.438308	-0.184026	-0.402517	-0.0855557	0.37146	0.0316926	-0.02879	0.782485	0.669437	0.798376	0.817952	1.11201	0.920464	0.973575	0.800365
BCR	-0.392799	0.255064	0.240943	0.4464	-0.158518	-1.05	-0.532476	-0.799928	0.303724	0.854921	0.765971	0.97176	-0.00060655	-0.327951	-0.165163	0.521126	-1.44341	0.23165	0.180963	0.267892	-0.444107	-0.953811	-0.718152	-0.970326
BCRP2	-1.11488	0.458451	0.0234489	0.403509	-0.498718	-1.17718	-0.582517	-0.768883	-0.371189	0.52491	0.538317	0.787127	-0.156682	-0.970617	-0.404426	0.221249	-0.870433	-0.0345829	0.368615	0.681697	0.335672	-0.033454	-0.313356	-0.361529
BCS1L	0.32259	0.258725	0.204724	0.345969	0.0459176	0.101501	-0.679807	-0.12097	0.0119835	0.118564	0.115788	0.207096	-0.518324	-0.316656	-1.19027	-0.633389	0.207585	-0.00338136	-0.298246	0.291901	0.17405	0.423927	0.0826801	0.481477
BCYRN1	0.599674	0.659052	0.501474	0.486793	-0.59022	-0.126817	-0.214245	-0.798869	0.645602	0.660307	0.652315	0.567823	-0.835841	0.280727	-0.0630756	-0.423385	-0.554429	-0.324955	-0.319333	-0.880195	-1.06682	-0.706538	-0.837539	-1.03618
BDH1	0.206056	0.166879	0.38467	0.290972	-0.297765	0.47235	-0.276275	-0.570352	0.0255025	0.388515	0.059472	0.185509	-0.180233	0.297279	-0.334236	-0.1847	0.345035	-0.226853	0.0463765	0.351439	-0.384529	-0.0321781	-0.310219	-0.483683
BDH2	0.527571	0.290331	0.898778	0.589771	-0.351246	0.688761	-0.72795	0.891006	0.637645	0.162107	0.634041	1.18332	-0.825887	0.583227	-0.679354	0.832205	-0.279708	-1.41726	-0.010176	-0.423473	-0.685538	-0.954566	0.870822	-0.955285
BDKRB1	-0.681114	-0.649262	-0.638704	-0.682063	0.0731802	-0.0619192	0.102108	-0.0949031	-0.572017	-0.56587	-0.469845	-0.572229	0.149247	0.597975	0.131543	0.577106	-0.498546	0.300549	-0.670972	-0.574919	0.110427	-0.212793	-0.0153057	-0.0870393
BDKRB2	-0.408805	-0.810749	-0.772562	-0.790891	-0.0266721	0.893185	0.749487	-0.253498	-0.688832	-0.664083	-0.223966	-0.691908	0.0556982	-0.42685	0.0405602	-0.246044	0.639089	1.33336	-0.687404	-0.142515	0.801668	0.698666	-0.0977652	0.280457
BDNF	-0.449598	-0.458492	-0.411735	-0.398977	0.219008	0.208566	0.300976	0.194113	-0.340424	0.018865	-0.256432	-0.34669	1.14055	-0.0162598	0.380953	0.197337	-0.196962	-0.377287	-0.170744	0.160887	0.335812	0.00495681	0.258714	0.155399
BDNF-AS	0.176388	-0.026319	-0.0125036	0.113773	-0.2841	-0.229611	-0.755584	0.0778355	0.571806	-0.678083	0.47219	-0.112933	-0.342561	0.288227	-1.94946	-1.87157	0.429453	0.430842	0.851449	0.72448	-0.255814	0.27209	-1.29893	-0.246189
BDP1	0.833851	0.368237	0.614297	1.15986	-0.451996	-0.826568	-0.703099	0.865409	0.82564	0.369055	0.781032	1.04312	-0.0652213	-0.418421	-0.304928	1.00068	0.124595	-0.536151	0.266191	0.291369	-0.46949	-1.47797	-1.26942	-0.586666
BEAN1	0.424217	0.0393148	-0.135113	0.482949	-0.0272477	0.951097	-0.300293	-0.435593	0.434905	-0.577247	-0.634622	0.135561	-0.743296	0.600754	-0.279058	0.468479	0.50103	0.00197189	-0.444587	-0.0234875	-0.618586	0.244676	0.27958	0.297916
BECN1	0.282197	0.232924	0.298329	0.0397722	-0.253932	-0.555231	-0.450737	-0.171689	0.319061	0.322033	0.365816	0.0952403	-0.4665	-0.407402	-0.338211	-0.234598	0.539858	0.450309	0.234244	0.290476	-0.256071	-0.380276	-0.319712	-0.42187
BEGAIN	1.98353	-5.18547	1.64332	-5.84786	-0.328661	1.59784	0.822709	1.58491	2.04974	-4.52887	2.33578	-4.44963	1.37329	2.20179	1.5005	1.95131	-3.11514	-7.97063	0.408392	-4.77127	-3.40982	-2.44106	-3.30797	-2.45875
BEND2	-0.109646	2.5276	0.0476362	-0.0482019	-0.298392	-0.222822	-0.0482019	-0.25367	0.0593461	-0.0845372	-0.268309	-0.255677	-0.138878	0.322899	-0.0842178	0.0169263	0.168957	-0.0243121	-0.269376	-0.210365	0.2066	-0.0159391	-0.194931	-0.191983
BEND3	-0.119512	0.278216	-0.0800533	0.0896915	0.360347	-0.522106	-0.175763	-0.553171	-0.337412	0.179443	-0.230179	-0.0446824	-0.847857	-0.46803	-0.30628	-0.315766	0.162055	0.500407	0.326652	0.4258	0.451376	0.384541	-0.0521606	0.227059
BEND3P1	-0.0592683	0.884703	0.636854	0.163989	0.710474	-0.498344	0.255929	-0.425066	-0.11463	0.257845	1.1503	-0.493897	-0.50789	-0.195771	-0.387682	0.736639	-0.21393	0.534658	-0.0215099	0.950123	-0.126015	0.495522	0.613817	-0.488018
BEND4	0.271473	0.362726	0.335421	0.505464	-0.124505	-0.123997	-0.209755	-0.318249	0.442772	0.382296	-0.196215	0.306295	-0.152166	0.211025	-0.305292	-0.497689	0.49262	-0.0207125	-0.735422	-0.855138	-1.0473	-1.3604	-1.07245	-1.37315
BEND5	0.669197	0.324275	0.302767	0.504384	0.106789	-0.475458	-1.21718	-0.731849	1.51936	1.11762	1.2698	1.9361	1.03302	0.286345	-0.982438	0.66898	-1.06717	-0.535544	-0.213084	-1.09637	-1.06346	-1.17234	-1.09599	-0.653269
BEND6	-0.415029	-1.09333	-0.140063	-0.633873	-0.366321	0.109281	-0.151951	-0.13172	0.249762	-0.897955	-0.178543	-0.115501	-0.0908567	-0.549989	-0.0670055	-0.465391	0.387	-1.26835	0.0118421	-0.312575	0.129784	0.0151395	0.760405	0.486974
BEND7	-0.571871	-0.290972	-0.447608	0.422174	-0.295173	0.919292	0.866052	0.102487	-0.717943	0.00481511	-0.288387	-0.151485	-0.0500524	1.44638	-0.0106892	0.0149895	1.01848	-0.289952	-0.375834	-0.439032	-0.0629846	2.26744	-0.142896	0.36575
BEST1	0.00862199	-0.64984	-0.728727	-0.411325	-0.385807	-0.0113425	0.0911896	-0.286735	0.827416	-0.845274	0.198457	0.204768	0.0329087	0.0309768	0.365649	0.599477	-1.04149	-1.23797	-0.317408	-1.22213	-0.0163326	-0.19166	-0.173227	-0.0245285
BEST2	-0.175254	-0.113919	0.0735308	-0.202913	0.437501	0.768345	0.794894	0.46466	-0.323517	-0.336151	-1.06543	-1.01976	-0.45266	0.797103	0.969034	-0.322537	0.186423	0.359854	-0.289231	0.496792	1.03717	1.26962	1.1057	0.914695
BEST3	-0.24584	-0.337399	-0.35304	-0.306002	-0.201134	0.383342	0.253394	0.24742	-0.120498	0.0204059	-0.287963	-0.31842	-0.21591	0.253328	0.379831	0.691654	-0.116715	0.379805	-0.151819	-0.45187	-0.191218	0.286903	0.323191	0.048799
BEST4	1.8603	1.40917	1.35836	1.78159	1.3169	2.02326	-0.271183	0.568429	-0.714387	-1.10994	-1.05589	-0.48916	-0.904369	-0.304405	-1.40247	-1.8228	1.32365	1.722	1.1978	1.30383	-0.410528	-0.526943	-1.54309	-1.70311
BET1	0.396915	-0.0835724	0.0726046	0.2832	0.0662439	-0.1189	-1.18496	-0.568283	0.680183	0.411065	0.332073	0.639919	0.0997521	0.0589989	-0.779361	0.0116646	0.631322	0.446416	0.56067	0.788265	-0.182053	0.279183	-0.315566	0.288888
BET1L	-0.150627	0.110181	0.284603	-0.361934	-0.52951	-0.482797	-0.136051	-0.485949	-0.10382	0.0833216	0.327346	-0.270457	-0.231067	-0.287895	-0.130086	-0.456695	1.0609	0.880851	0.991225	1.02198	0.801983	0.833178	0.880851	0.964663
BEX1	0.17853	2.24487	3.04509	0.718153	-0.503976	-0.255405	0.491606	-0.716578	0.441571	0.535178	0.799966	-1.1639	-0.320062	1.5037	-0.305222	-0.74671	-1.15775	-1.54065	0.313677	-0.285514	-0.302476	-0.670972	0.7534	1.40508
BEX2	0.474557	0.743647	0.950008	0.157176	-0.563454	0.588713	-0.475615	0.346817	0.470259	0.313338	0.392492	0.270955	-0.223433	0.479337	-0.260683	-0.282951	-0.520968	-0.204245	-0.330107	-0.772624	-2.13429	-1.62772	-1.9575	-1.91953
BEX3	-0.109074	0.177833	0.297766	-0.332957	0.758557	1.56819	0.780952	1.25627	-2.48007	-2.87591	-2.69071	-3.32822	-2.73787	-1.26239	-0.683732	-1.48705	1.27086	0.820463	0.707496	0.326429	-0.467414	0.697299	1.11245	0.907901
BEX4	0.0376392	0.303308	0.290318	0.427637	-0.82501	-0.814582	-0.493544	0.40798	0.982576	1.23406	1.10434	1.2161	0.740181	0.4188	0.0551045	1.18552	-0.631287	-0.112759	0.194003	-0.382697	-1.90231	-1.8835	-1.36955	-1.11519
BEX5	0.589226	1.13054	0.281573	1.05699	-0.891678	-1.21953	-0.555827	-0.578557	-0.0607105	-0.616681	-0.593938	-0.127795	-1.01689	-1.35385	-2.9851	-0.336692	4.58575	4.48544	4.13986	5.05906	3.10129	3.86173	4.01497	3.74786
BFAR	0.0248926	0.0809065	-0.00608942	0.330271	0.00505567	0.0239663	-0.853255	-0.361771	-0.130014	0.877985	-0.262157	0.151935	-0.255166	0.265071	-0.749836	0.0346517	0.388398	0.195318	-0.148168	0.608197	0.0785915	0.0676081	-0.357903	-0.31268
BFSP1	-0.780672	-0.784705	-0.401025	-0.824147	0.0987922	0.229627	0.0121127	-0.241259	-0.642056	-0.649044	-0.5191	-0.706146	0.146574	-0.339498	0.0370379	-0.258011	-0.60208	2.32427	0.599118	-0.126936	0.0147845	0.25277	0.00672936	-0.185803
BFSP2	-3.53914	-2.66787	-3.2221	-2.92628	-0.665105	-1.92247	0.131297	0.437678	-4.20966	-2.72167	-4.15413	-3.0032	-0.407966	-1.18639	0.332197	0.460444	0.859936	1.56215	0.476849	1.34234	1.98788	2.24878	3.46277	3.0153
BFSP2-AS1	-1.74918	-0.599217	-1.00988	-0.147732	-1.03263	0.389576	-0.431306	0.881293	-0.0949114	-0.461655	-1.10792	-0.983745	-1.52714	0.0216105	-1.14036	0.733869	1.60981	2.07873	1.56395	2.16502	1.83908	2.11095	2.01156	1.94578
BGLAP	0.0896105	0.124242	-0.288802	0.211237	-0.540086	0.449116	-0.349913	-0.232963	0.305523	0.297279	0.0871886	0.460832	-0.224573	0.750882	-0.326271	0.235307	-0.0764124	-0.0736135	-0.377985	0.0836061	-0.277333	0.272278	0.797736	0.087268
BGN	0.868287	1.00851	0.347049	0.818708	-0.743006	-0.509107	-0.5294	0.726507	-0.982996	0.729965	0.0802889	-1.39786	-0.108411	0.182537	-0.360012	0.4188	-1.19082	-1.00039	-1.22023	-1.6025	-0.448537	0.31485	0.788908	-0.229482
BHLHA15	-0.562091	-1.24869	-2.14532	-1.43398	-0.253498	-0.283475	-0.34979	-0.830999	-0.952995	-2.28378	-1.97146	-1.53837	-0.578012	-0.624324	-0.187659	0.635249	3.4525	2.85077	2.976	3.33848	2.91161	3.00373	2.77639	3.17271
BHLHA9	0.377771	0.556691	-0.327001	0.102757	0.0129174	0.7774	0.223284	0.706425	-1.21985	-0.0446824	-0.378436	0.0166437	-0.387536	0.645602	0.78337	0.831146	-1.00745	-0.00342158	-1.71216	-0.30154	-0.325591	1.07975	0.897711	1.20481
BHLHB9	0.57896	-0.531355	0.122646	0.591995	-0.262604	1.53738	-0.604781	-1.00959	-0.0889148	-1.39043	-1.02033	-0.0224409	-0.27716	0.808532	-0.531377	-0.246423	0.669567	1.2437	-0.0396664	0.857793	-0.00186924	0.500836	0.605329	0.955986
BHLHE22	-0.321254	-0.306132	-0.250572	-0.355776	0.24583	0.247457	0.35566	0.261559	-0.198667	-0.203056	0.0104335	-0.310843	0.413163	0.110304	2.09941	0.23243	-0.0247363	-0.174619	-0.00580104	-0.252667	0.398939	0.0218752	0.363678	0.234613
BHLHE23	-0.0286759	-0.274424	-0.32648	-0.0703858	1.894	0.817708	-0.145787	-1.08339	0.174723	0.392712	-0.0553381	-0.184026	1.7038	0.560808	-0.214154	-1.07465	0.339367	0.0617157	0.529348	0.213249	2.85255	2.25247	0.345564	-0.516624
BHLHE40	0.973371	0.642339	0.274718	1.01725	0.824841	0.775222	1.207	1.95705	-0.772074	-2.04421	-2.08818	-0.932905	0.360808	-0.079954	-0.224573	0.323092	-1.74909	-0.120602	0.275337	-2.8433	-2.06963	-3.28539	-1.75519	-1.25339
BHLHE41	-0.209111	-0.215994	-0.224395	0.462502	0.711412	-0.296983	-0.38976	-0.818392	-2.35146	-3.34841	-2.9956	-2.05712	-0.0987489	-1.98228	-2.01807	-2.85491	0.657443	0.873061	0.581141	1.19018	1.22437	0.791912	0.471775	0.107387
BHMG1	-0.413654	-0.415349	-0.392094	-0.0442761	0.263227	0.767988	0.984973	0.57265	-0.284794	-0.2799	-0.176004	-0.282627	0.769358	0.119385	0.604411	1.07721	-0.111766	-0.301331	-0.236634	-0.220755	0.929179	0.140295	0.604371	0.372297
BHMT	-0.672336	0.226237	0.524358	-0.757448	0.199643	-0.156366	0.382533	-0.207149	-0.741885	-0.725152	-0.615159	-0.503862	0.0388201	-0.369255	0.0494631	-0.210756	-0.71321	-0.00387113	-0.989593	-0.0536762	0.00364595	0.286247	-0.0928082	0.594638
BHMT2	-0.303917	-0.296458	-0.255974	-0.205181	0.392796	0.362102	0.474557	0.336954	-0.204149	-0.166476	-0.0275091	-0.213791	0.533393	0.14114	0.575519	0.409947	0.0154059	-0.164205	-0.0687232	-0.130851	0.561067	0.173581	0.443609	0.316809
BICC1	-0.15253	-0.211915	-0.0405591	-0.743253	-0.0986722	-0.116582	0.0298073	0.0995984	-0.118308	-0.428533	-0.48396	-0.665505	0.0494631	1.05633	0.184902	0.583708	-0.478665	0.888931	-0.68968	-0.290639	-0.00623889	-0.252273	-0.0928588	0.610766
BICD1	0.834814	0.81983	0.40543	0.404577	0.515795	-0.511658	-0.692594	-0.642242	0.36619	0.240063	-0.469283	0.25533	0.0585147	-0.507612	-0.152084	-0.737126	0.175158	0.143533	0.171977	0.455606	0.387795	-0.422335	-0.789686	-0.327957
BICD2	0.950008	0.331356	0.506892	0.647631	0.362222	-0.336841	-0.711792	-0.41422	1.37831	0.693925	0.949233	0.958791	0.151332	-0.200178	-0.653234	0.0278388	0.227266	0.0464889	0.291606	0.0775724	-0.673646	-1.07459	-0.954011	-0.957846
BICDL1	0.278695	1.36467	0.283644	0.338874	-0.522753	-0.432125	0.600455	1.37738	0.410814	0.35447	-0.921627	0.0678079	0.285089	-0.302348	-0.344394	0.228244	-0.219983	0.300653	0.242346	0.00310503	-0.0105938	-0.419204	-0.299997	-0.633547
BICDL2	0.339631	0.588961	0.588473	-0.153534	-0.904705	-0.299564	-0.512563	-0.286512	0.524505	0.217733	0.90153	0.243631	-0.639452	0.110437	-0.0552313	-0.135651	0.153986	-0.148373	0.39813	-1.27671	-1.23348	-0.507894	-0.609238	-0.504817
BICRA	0.0597013	0.0656501	-0.00415678	-0.0920112	0.232013	-0.211796	0.0154254	-0.766	0.0591335	0.170079	0.145926	-0.12054	-0.136562	0.27872	-0.0122779	-0.498301	0.323403	0.299445	0.021672	0.154841	0.114383	0.276288	-0.0989594	-0.630034
BICRAL	0.416093	0.498048	0.503055	0.668694	0.676773	0.209749	-0.160815	-0.268996	0.50802	0.281143	0.212513	0.350069	-0.334021	-0.148936	-0.609626	-0.653933	-0.0777345	0.0356906	0.148575	0.111055	-0.711932	-0.870433	-1.01131	-1.29297
BID	-0.0982915	0.131678	-0.013707	0.139833	0.024463	-0.12976	0.552452	-0.373244	-0.920161	-0.938295	-1.16257	-0.406058	-0.889645	-1.35988	-0.000107438	-1.1956	1.93283	1.90222	1.66362	2.00002	1.8498	1.46521	2.12273	1.5269
BIK	-1.93167	-2.31697	-3.09244	-1.18848	0.726417	0.789566	1.35441	1.38169	-5.83859	-5.83859	-4.75859	-4.27651	-3.84079	-3.94338	-0.930976	-1.83248	4.49768	3.84244	3.53453	3.83669	3.81213	4.01497	3.32863	3.83669
BIN1	0.865176	0.728723	1.10213	0.114477	-0.353471	0.345969	-0.386113	-0.492205	0.678044	0.506453	0.775719	0.249339	0.244912	0.349885	-0.162089	-0.538342	-1.91055	-1.1439	0.495113	-2.65744	-3.17139	-1.57014	-2.75293	-2.67774
BIN2	-0.0346914	0.0184336	-0.0980684	-0.128873	-0.229044	-0.538851	0.171123	0.532512	0.475103	0.501264	0.663824	0.19849	-0.975492	-0.750842	-0.543983	-0.486786	1.15354	1.19858	1.50745	1.38063	-0.0292128	-0.0694436	-0.517926	-0.391206
BIN3	0.239216	0.153127	-0.0421578	0.114007	-0.208313	-0.432911	-0.426277	-0.301679	0.333254	0.230167	0.151623	0.381773	-0.224758	0.0812051	-0.259234	-0.263214	0.365504	0.102297	0.0851545	0.225283	-0.44132	-0.114877	-0.226347	-0.22114
BIN3-IT1	0.726328	0.676413	0.408316	-0.065041	-0.579923	-0.352257	0.258527	0.104894	0.0683846	0.596441	0.591397	-0.22535	-0.993952	0.253838	0.135169	0.49676	-0.200629	0.00254029	-0.0235697	-0.605763	-0.60875	-0.184009	-0.389041	-0.153446
BIRC2	-0.00299321	-0.019307	0.0383855	0.0560693	0.202536	-0.789802	-0.676999	0.17262	0.0123603	0.176449	0.19999	-0.0527833	-0.0145071	-0.606087	-0.316712	-0.0719054	0.504867	0.348622	0.597086	0.66436	0.0075728	-0.470134	-0.196425	0.184499
BIRC3	-0.0634008	0.602745	0.699166	0.47278	1.33263	0.872979	-0.728206	-1.18332	0.50957	1.26125	1.49622	1.06627	1.44928	0.88069	-0.140937	-0.516982	-2.56542	-1.97752	-0.56715	-1.76568	-1.20823	-2.61094	-3.197	-3.41885
BIRC5	-1.63791	-2.39268	-2.31697	-1.1746	-0.795634	1.10438	1.71591	0.0280728	-3.89207	-3.57505	-3.91494	-3.6944	-4.87731	-3.46879	-0.431914	0.22952	6.63246	5.10202	5.0254	6.18146	6.18146	6.63246	7.00041	6.03276
BIRC6	0.250157	0.0917531	0.130861	0.311528	0.0169746	0.0320909	-0.370638	-0.194192	0.483345	0.273095	0.211393	0.413975	-0.0980822	0.161856	-0.034587	-0.235542	-0.771999	-0.304448	-0.71321	0.0259437	-0.752457	-0.82926	-0.885057	-1.03893
BIRC7	-0.149428	0.543123	1.0481	0.563948	-0.557895	0.61662	0.880743	0.0850098	0.243881	0.0826163	-0.603984	0.143018	-0.33051	1.02436	0.271035	0.761871	0.506431	-1.22572	-1.45819	0.0218752	-0.299803	-0.692157	0.959525	-0.526361
BIRC8	-0.56851	0.961663	-0.529695	-0.507863	0.168521	0.0709444	1.54318	0.0558087	-0.469134	-0.443247	-0.364872	-0.433951	0.238063	-0.229742	0.226821	0.0872528	-0.345519	-0.542022	-0.374031	-0.400602	0.209384	-0.0907571	2.8214	0.003563
BIVM	0.103362	0.606309	0.434023	0.026908	0.190481	0.118508	-0.251859	0.532602	-0.804354	-0.54275	-0.520967	-1.48975	-1.29643	-0.899363	-1.6061	-1.34972	1.09922	1.35137	1.27696	0.690543	-0.396791	-0.02418	-0.692185	0.0406755
BLACE	-0.0382989	-0.84107	-0.809686	-0.410305	-0.053131	-0.0206937	0.152003	1.05207	-0.672154	1.43425	-0.534593	-0.688372	0.716648	0.611001	0.140584	-0.179159	0.136447	-0.205141	-1.12109	-0.264216	1.58044	-0.212234	0.0473607	0.699037
BLCAP	0.297641	0.200877	0.42984	0.51358	-0.765132	-0.627672	-0.230293	0.381597	0.659318	0.435793	0.952685	0.718829	-0.541818	-0.476499	-0.143769	0.905903	-0.000649731	-0.000649731	-0.126838	0.0273361	-0.775217	-0.751361	-0.815286	-0.853491
BLID	-0.257815	-0.26045	-0.207193	-0.28263	0.458028	0.330378	0.420121	0.283582	-0.127722	-0.106812	-0.0249609	-0.225105	0.607708	0.138949	0.458333	0.371179	0.0692904	-0.101118	0.0378714	-0.114607	0.563378	0.166562	0.35566	0.277997
BLK	0.745296	0.630889	0.754848	0.955054	0.775222	0.795562	0.439815	0.334888	0.135615	0.121147	0.0910522	0.290361	0.106943	0.281571	-0.157818	-0.484328	-0.949445	-0.795276	-0.365852	-0.377563	-1.90807	-1.98011	-2.45618	-2.6655
BLM	0.071457	0.165225	-0.0606619	0.350769	0.262207	-0.136306	-0.305162	-0.397042	0.000610373	0.0631856	-0.36638	0.0811216	-0.685967	-0.471464	-0.819971	-0.877505	1.38102	1.50962	1.22264	1.76381	1.51837	1.27718	1.34194	0.806309
BLMH	-0.053349	-0.0300106	-0.248774	0.294178	0.211903	-0.498665	0.233349	0.620238	-0.547442	-0.849682	-0.855043	-0.38126	-0.507457	-1.15482	-0.516229	-0.299526	2.38656	1.8498	1.93116	2.54165	1.93698	1.39037	1.80573	1.85832
BLNK	0.104983	-0.0981709	-0.0167158	0.0551554	-0.200713	-0.391016	-0.792145	-0.0563011	0.136888	0.124006	-0.187534	0.231002	-0.0679892	-0.30728	-0.735613	0.076677	0.532236	0.302106	0.479093	0.384466	-0.171369	-0.237457	-0.27212	0.283012
BLOC1S1	0.0509647	0.0881036	-0.00129649	-0.0534871	-0.596259	0.338531	0.637946	-0.17684	0.0349078	0.0207224	0.210538	0.158634	-0.408573	0.504863	-0.00287366	-0.265187	0.519498	0.396374	0.262168	0.413544	-0.349189	0.9105	0.721365	0.222827
BLOC1S2	0.152953	-0.843697	0.230453	-0.617706	-0.269751	-0.292511	0.0542521	0.0799229	1.19866	0.222002	1.11814	0.311143	-0.0218966	0.433445	0.208139	0.636429	-0.173441	-1.59377	0.305667	-1.65374	-0.977898	-1.00939	-0.679191	-0.865254
BLOC1S3	0.230158	0.109733	0.160613	-0.0477838	0.509047	0.376785	0.35069	-0.596569	0.453649	0.118976	0.27114	0.231079	-0.000416154	0.385004	-0.0355898	-0.429388	0.192028	-0.00627688	-0.123623	0.155159	-0.09366	0.294682	-0.201553	-0.452269
BLOC1S4	0.170763	-0.104866	0.84393	1.08413	1.87925	0.757474	-0.424661	-0.682551	0.26973	-0.0587417	0.869819	1.06878	1.54982	0.415312	-0.930024	-0.431823	-0.525627	-1.30155	-0.564401	0.592404	0.730816	-0.0776109	-0.82018	-1.15184
BLOC1S5	0.342344	0.14342	0.247807	0.361086	0.708719	0.246468	-0.606341	-0.435483	0.504279	0.164094	0.256167	0.517276	0.46344	0.293918	-0.486032	-0.390565	0.0828961	-0.231684	-0.261944	0.157821	-0.214072	-0.38682	-0.682537	-0.473439
BLOC1S5-TXNDC5	-0.344494	-0.636404	-0.61678	0.0313933	0.276318	-0.903914	-0.290489	-0.900759	-0.0175952	-0.631817	0.152025	0.460752	-0.733104	-1.24702	-0.616615	0.0659432	6.18146	5.91354	5.86997	6.35643	6.11144	6.03276	5.74525	5.66872
BLOC1S6	0.143382	0.142647	0.237783	0.203928	-0.5226	-0.641846	-0.344534	-0.95122	0.613611	0.482055	0.631055	0.740181	-0.268896	-0.481427	-0.157322	-0.517322	0.377368	0.265855	0.419548	0.460386	-0.328539	-0.579549	-0.234757	-0.562844
BLVRA	-0.0993456	0.0478219	-0.284645	-0.0652687	0.0723191	0.136613	0.637242	0.453438	-1.50672	-2.2491	-2.09111	-1.87304	-1.5752	-2.25573	-0.780808	-1.85793	0.970829	1.4432	0.92713	0.994367	0.408933	0.897711	1.74298	1.29183
BLVRB	0.770541	0.248264	0.399133	0.730848	0.591995	1.11722	0.725083	-0.261374	0.0621611	-0.549852	-0.319411	0.231593	0.249523	0.318541	0.195687	-0.472085	-1.60488	-1.74984	-2.02422	-1.16925	-0.833048	-0.361529	-0.383505	-0.938598
BLZF1	0.158323	0.274772	-0.061779	0.40798	-0.38386	-0.547501	-0.548051	-0.589392	0.334804	0.68586	0.421254	0.450383	-0.62943	-0.324511	-0.0472939	-0.363759	0.471919	0.302803	0.510016	0.41714	-0.316719	-0.3589	-0.730067	-0.371113
BMERB1	3.04509	2.17778	3.09629	2.14158	0.576718	1.60508	1.57985	0.968096	1.09783	-1.882	-1.28394	-1.03793	-0.322011	-0.194555	0.151022	-1.40851	1.26496	-1.02434	0.153903	0.315759	-2.53753	-1.24527	-0.470134	-0.785434
BMF	1.20919	0.414214	1.15831	0.687362	-0.241127	0.638159	0.615339	0.665106	0.516517	-0.0726502	0.461984	0.349503	-0.269571	-0.150771	-0.454534	-0.358331	-0.372833	-0.216352	0.160122	0.011476	-0.951513	-1.47199	-0.537931	-0.743499
BMI1	0.807278	0.474156	0.663686	0.370732	0.563277	0.498048	-0.797877	-0.243608	0.160731	0.163091	0.15548	0.246932	0.527712	0.3631	-0.560841	0.136091	-0.19849	0.0884713	-0.212975	0.0845598	-0.250637	-0.895111	-0.728293	-0.675523
BMP1	-1.17243	0.348597	-1.08973	-1.21416	0.752704	-0.576236	-0.156983	-0.215528	-0.712106	-0.851846	0.40281	-1.0822	-0.0197705	0.258465	-0.205782	-0.331975	0.64671	0.880361	-0.0663984	0.116921	1.75846	1.70651	1.16525	0.200241
BMP10	0.532602	-0.20653	0.557876	-0.647894	-0.541869	1.01522	0.260458	-0.571871	0.392083	0.591841	-0.73826	-1.07752	-0.260482	0.735738	0.0637676	0.461827	0.275735	-0.506292	-1.02739	-1.03988	-0.235453	-0.41829	1.50796	-0.437596
BMP15	-0.277982	-0.269326	-0.237305	-0.254671	0.469227	0.358658	0.493788	0.33643	-0.150347	-0.123896	-0.0460642	-0.192548	0.641979	0.155938	0.565612	0.433852	0.0373069	-0.123144	0.0547628	-0.085042	0.644088	1.16719	0.445215	0.332169
BMP2	-0.365847	-0.357642	-0.329062	-0.236838	0.361278	1.78613	0.484651	0.376972	-0.2758	-0.264289	-0.16075	-0.192388	0.529298	0.230932	0.584063	0.436833	-0.105362	-0.257924	-0.231199	-0.0905523	0.587587	0.234013	0.457118	0.406323
BMP2K	0.052341	0.263854	0.142218	0.432483	0.135576	-0.646626	-0.0355676	-0.0393658	0.375179	0.836292	0.234866	0.503952	1.06517	0.158508	0.750229	0.778645	-2.28587	-2.03448	-1.46639	-1.61242	-1.29893	-1.83129	-1.26986	-1.07612
BMP3	-1.1402	-0.901805	-1.07229	-0.250572	-0.357057	-0.193491	0.821173	-0.508629	2.81154	2.65609	1.94285	2.90861	-0.181858	-0.585118	2.01965	1.1695	-0.121976	0.380769	2.66362	-0.608238	-0.181068	-0.520045	0.0768215	-0.386658
BMP4	-0.912319	3.02854	-0.849262	-0.709193	-0.157463	1.11305	0.0877161	-0.180429	0.0297536	-0.0800745	-0.560736	-0.703351	0.105496	-0.234654	0.883291	0.612818	-0.709743	0.565374	-1.09	-0.845695	0.128992	-0.271308	-0.00591054	-0.119103
BMP5	-0.510961	0.252799	-0.48446	-0.467993	0.23707	0.412752	0.239328	0.0972443	0.125152	-0.382284	-0.330854	-0.403789	0.298271	-0.168413	1.0036	0.507427	-0.276094	-0.45813	-0.273073	-0.347269	0.274401	0.990368	0.145823	0.0553907
BMP6	0.264083	-0.00111243	-1.09476	0.509302	-0.159343	-1.41616	0.215207	-0.683289	0.0992797	-1.40916	-2.06431	0.182721	-1.06959	-1.67995	-2.25573	-0.418817	4.94208	5.454	4.26941	5.34303	5.12685	4.48002	4.99478	5.28592
BMP7	0.00412389	-0.241453	-0.502831	-0.0348567	0.122373	0.164201	0.256182	0.123125	-0.431194	-0.269302	-0.287257	-0.430566	0.461827	0.281791	0.320763	0.564707	-0.292323	-0.281696	-0.459758	-0.116476	0.79021	-0.0503805	0.22335	0.460203
BMP8A	0.775787	-1.92593	-1.72653	0.109996	-0.885752	-1.18959	1.73774	1.47261	-1.60828	-1.55632	-1.35867	0.190752	-0.739208	-1.36842	1.57166	1.43685	3.15927	3.93374	3.36297	3.20022	1.14694	1.01188	-0.546819	-0.280224
BMP8B	-0.378176	0.263145	0.382837	0.232211	-0.240182	-1.03626	-0.243921	-0.686909	-0.28601	-0.990759	-0.858886	-1.05104	-0.988148	-0.792042	-0.63091	-1.30765	3.69414	3.46573	3.64405	3.64405	2.80337	3.12604	1.62507	1.89963
[truncated: 23,591 more rows]
